# Supplementary material for: Lupus dermal fibroblasts are proinflammatory and exhibit a profibrotic phenotype in scarring skin disease
Source: PubMed Central journal article supplement (PMC10972618; doi:10.1172/jci.insight.173437), 2024-02-15
Supplement: jciinsight-9-173437-s136.pdf [file jciinsight-9-173437-s136.pdf]

**Supplemental Figure 1. Fibroblast subtype populations present before (a) and after (b) cytokine stimulation.** Visualization of raw normalized counts (a) and log<sub>2</sub>FC for DEGs (b) using the top 10 cell markers for each fibroblast subtype cluster identified in the scRNA-seq dataset.

**A**

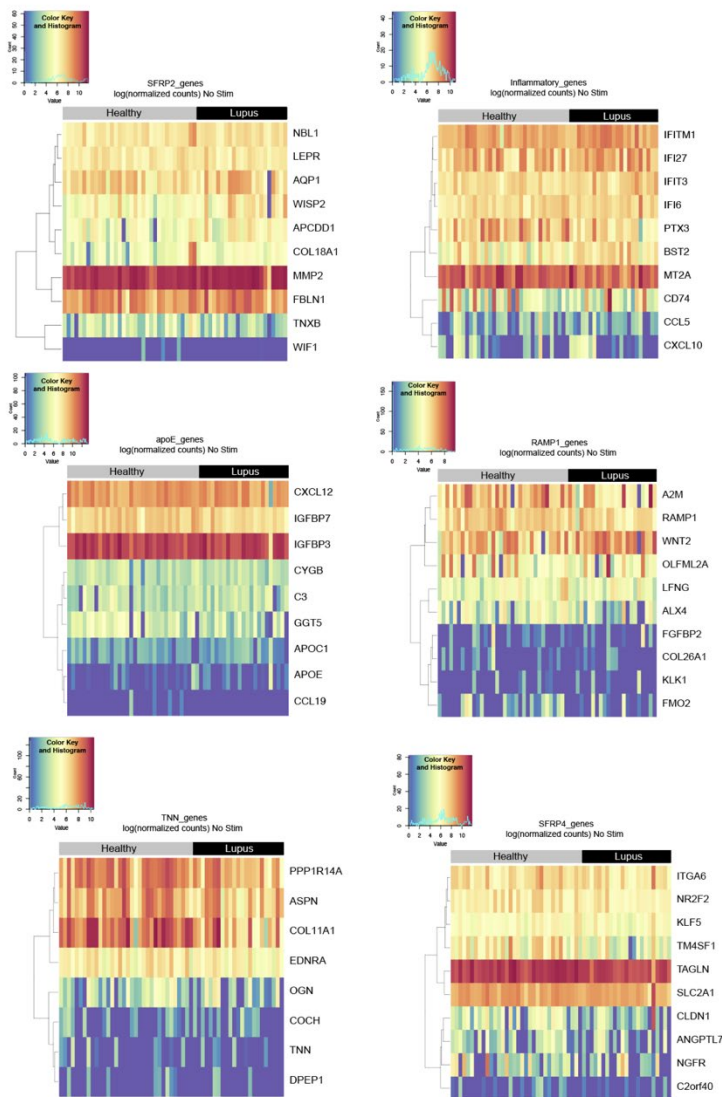

B

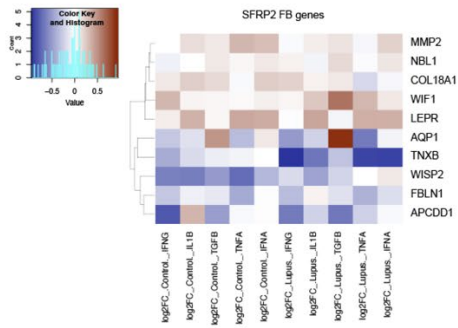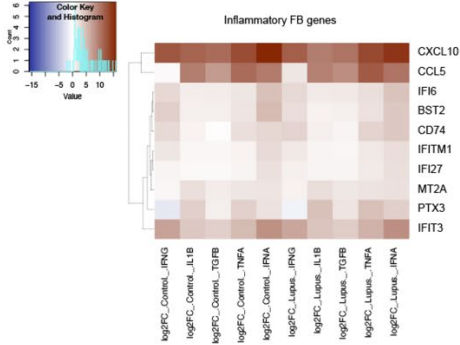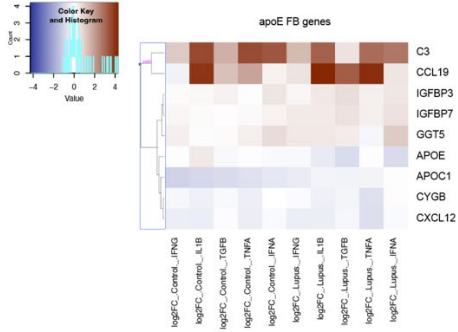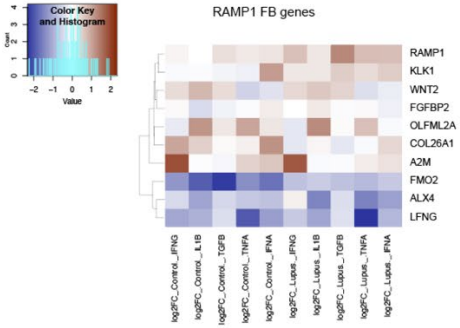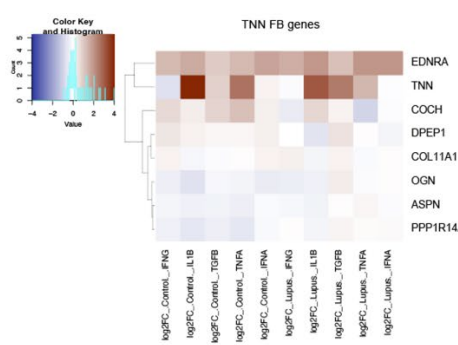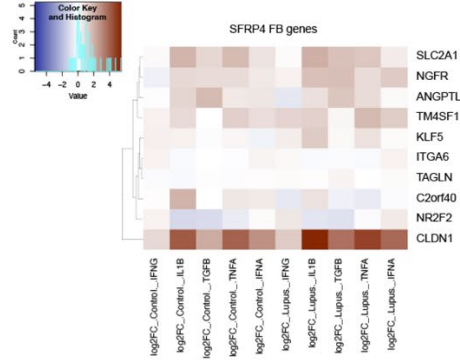

**Supplemental Figure 2:** Workflow schematic for SCLE vs. DLE single cell RNA sequencing analysis.

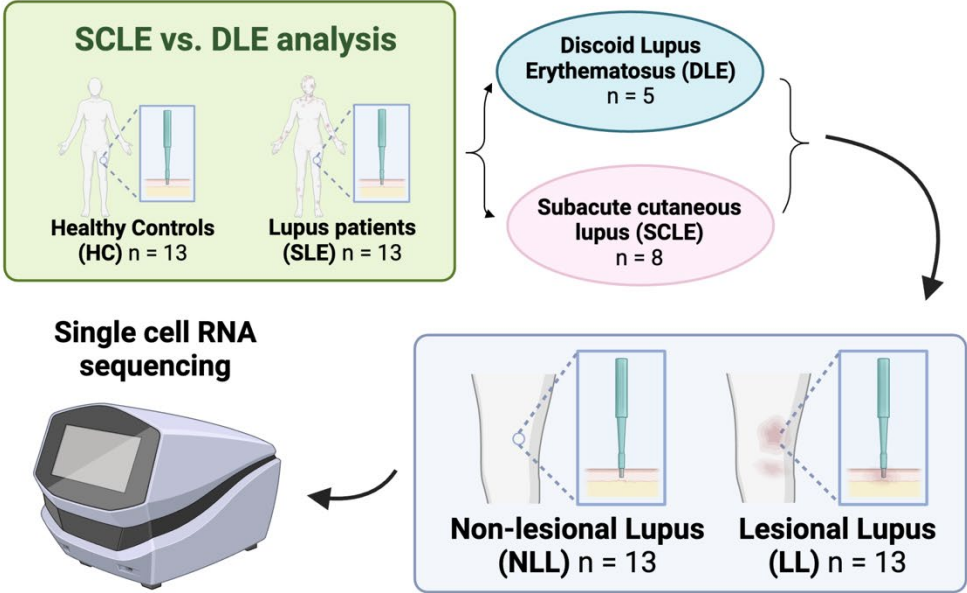

**Supplemental Figure 3: Upregulation of inflammatory pathway and collagen genes skewed in fibroblasts are found in lesional biopsies from scarring or non-scarring CLE.** Heatmaps illustrating the relatively higher upregulation of **a)** cytokine-cytokine receptor pathway, **b)** collagen pathway, and **c)** inflammatory pathway genes in lesional bulk RNA-seq data from patients with DLE (scarring) vs. SCLE (non-scarring).

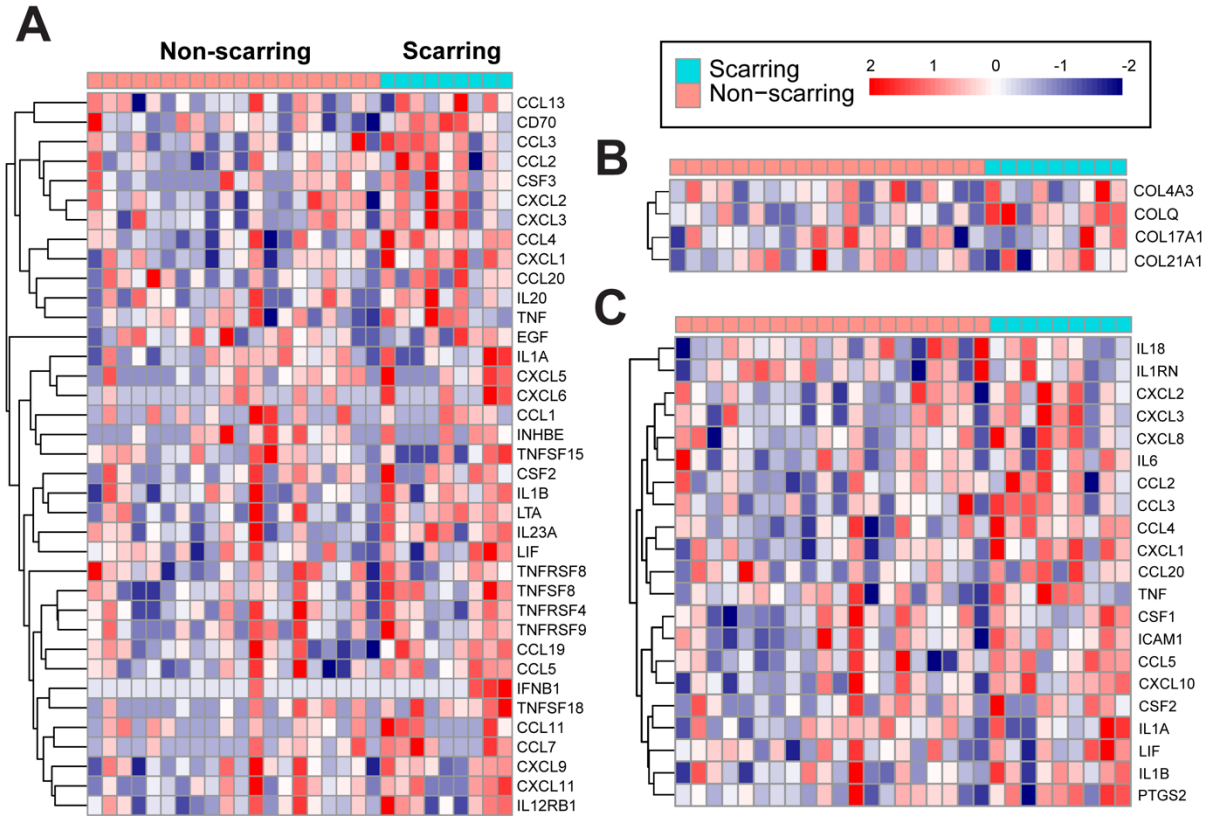

**Supplemental Figure 4:** Cell-cell interactions. Visualization of cell-cell communications from the single-cell data using CellChat (9). Node size indicates number of interactions and edge weight denotes strength of interaction. Numerous strong interactions are noted between inflammatory fibroblasts and SFRP2+ fibroblasts.

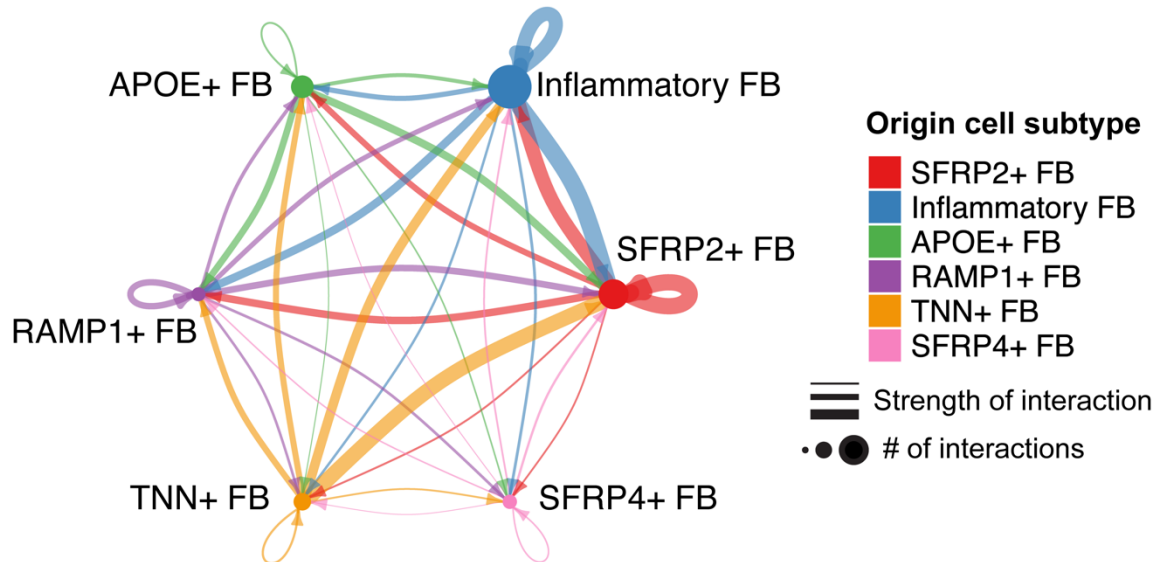

**Supplemental Figure 5: Pseudotime analysis.** Pseudotime trajectory between the various subtypes of fibroblasts (A) and heatmap showing gene expression for each of the subtypes across pseudotime (B).

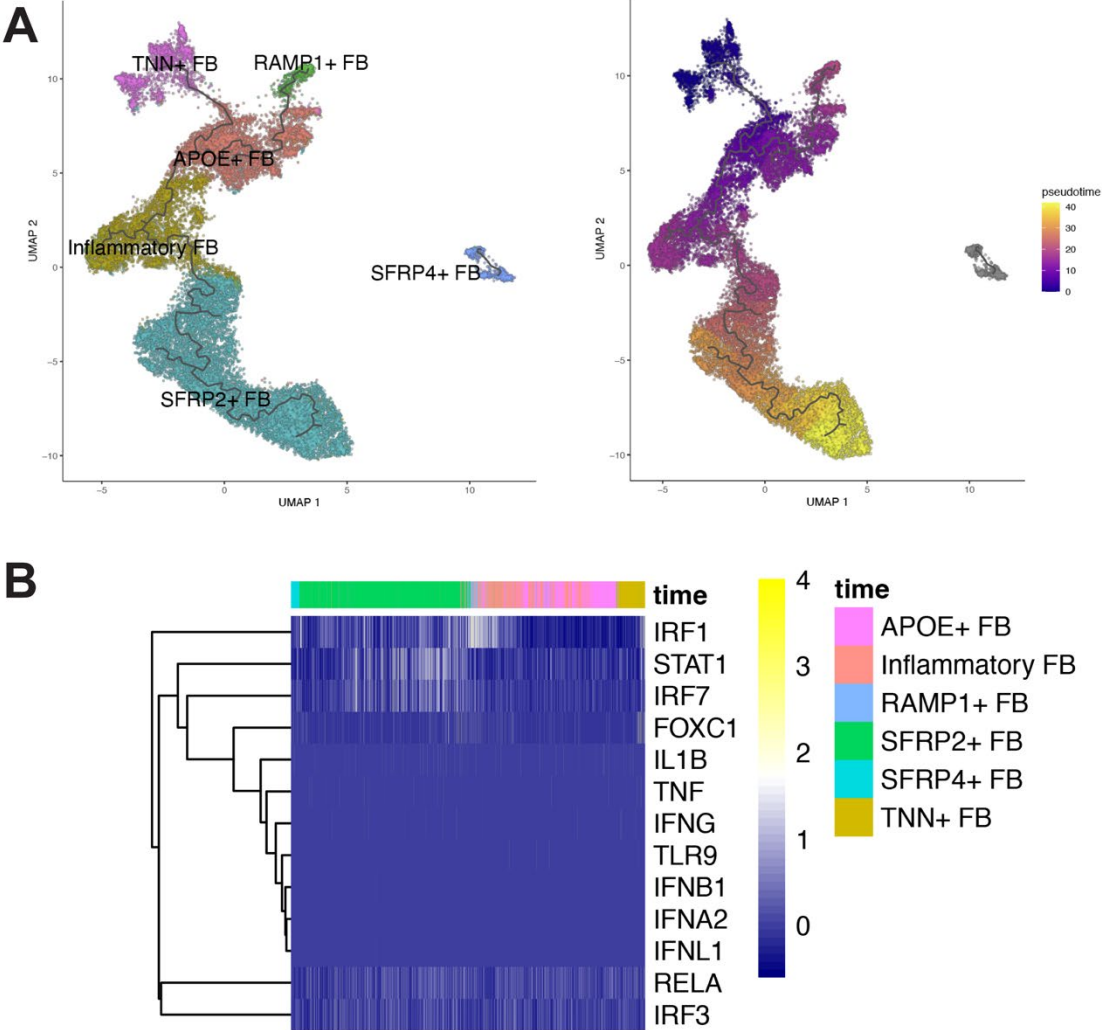

**Supplemental Figure 6. Additional immunostaining for specific collagens in lesional skin sections from additional lupus patients with SCLE or DLE.** Formalin-fixed paraffin-embedded tissue sections from lesional skin were stained for COL17A1, COL21A1, and COL4A3. Representative images from different patients of each subtype are shown at 200X magnification with a scale bar of 200  $\mu$ m.

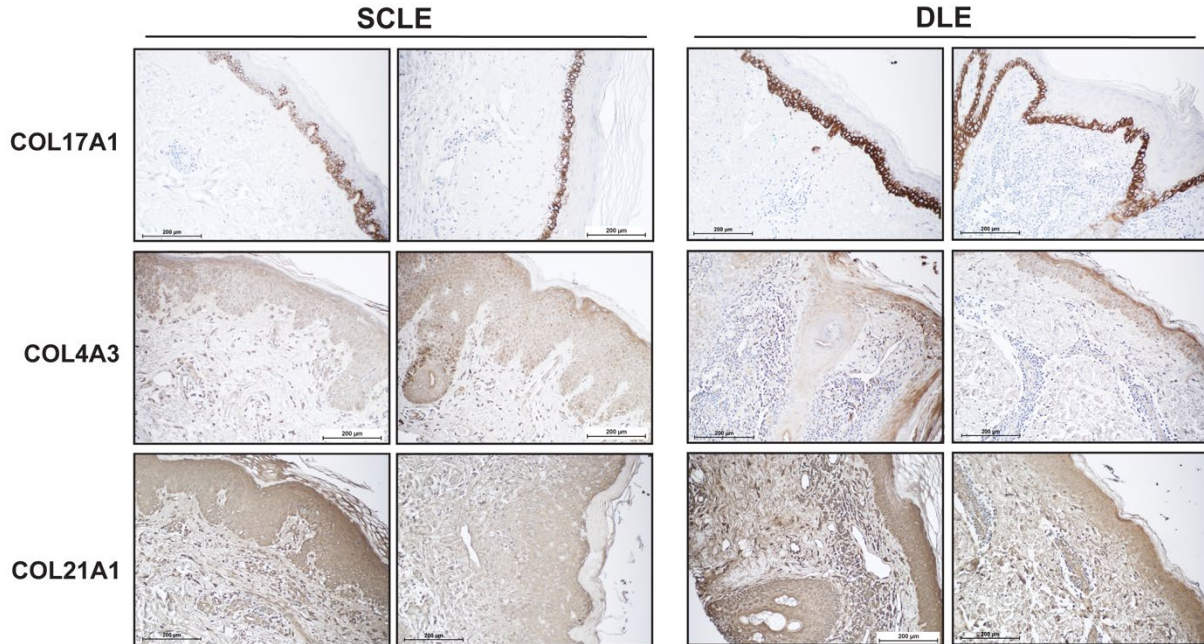



**Supplemental Figure 7. TGF- $\beta$  induces significantly high levels of COL1A1 expression in dermal fibroblasts from SLE patients with scarring skin disease.** (A) Quantification of immunostaining for COL21A1, COL4A3, and COL17A1 from **Figure 6**. (B) Dermal fibroblasts isolated from healthy control (HC, n=3) volunteers or from the non-lesional skin of patients with non-scarring (SCLE, n=3) or scarring (DLE, n=4) CLE were treated with vehicle or stimulated with 10 ng/mL TGF- $\beta$  for 24 hours. Collagen type I alpha 1 (COL1A1) expression was quantified by qPCR. Expression was normalized to  $\beta$ -actin and compared to untreated HC. Data were analyzed by one-way ANOVA; p-values for all comparisons are shown, and the statistically significant response is denoted by asterisks (\*\*p-value < 0.01).

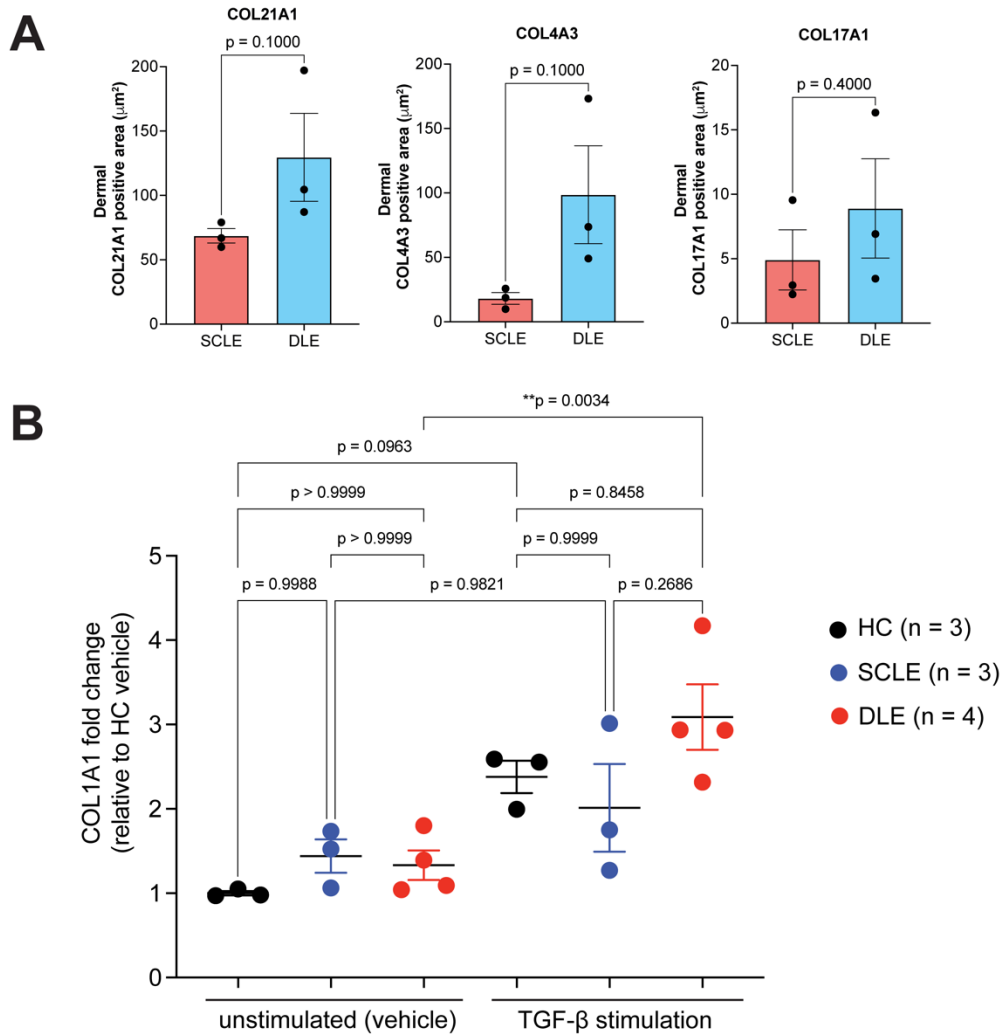



**Supplementary Table 1: Demographic data for study population**

|                                             | <b>Control (n = 33)</b> | <b>Non-damage (n = 13)</b> | <b>Damage (n = 8)</b> |
|---------------------------------------------|-------------------------|----------------------------|-----------------------|
| <b>Age at skin biopsy, years, mean (SD)</b> | 27.5 (19.8)             | 47.6 (13.0)                | 49.7 (15.0)           |
| <b>Sex (n)</b>                              |                         |                            |                       |
| Female                                      | 24 (73%)                | 11 (85%)                   | 8 (100%)              |
| Male                                        | 9 (27%)                 | 2 (15%)                    | 0 (0%)                |
| <b>Ethnicity (n)</b>                        |                         |                            |                       |
| Caucasian                                   | 31 (94%)                | 13 (100%)                  | 3 (38%)               |
| Black                                       | 3 (9%)                  | 0 (0%)                     | 6 (75%)               |
| Hispanic                                    | 0 (0%)                  | 1 (8%)                     | 0 (0%)                |
| Other/Unspecified                           | 1 (3%)                  | 0 (0%)                     | 0 (0%)                |
| <b>BMI, mean (SD)</b>                       | 27.4 (5.5)              | 32.2 (7.2)                 | 26.9 (6.0)            |
| <b>Autoantibodies** (n)</b>                 |                         |                            |                       |
| dsDNA (21)                                  |                         | 5 (38%)                    | 5 (63%)               |
| Smith (21)                                  |                         | 2 (15%)                    | 3 (38%)               |
| SSA/SSB (16)                                |                         | 2 (22%)                    | 2 (29%)               |
| RNP (15)                                    |                         | 3 (33%)                    | 0 (0%)                |
| Chromatin (15)                              |                         | 3 (33%)                    | 1 (17%)               |
| Beta2-glycoprotein, anti-cardiolipin (15)   |                         | 0 (0%)                     | 3 (50%)               |
| <b>Low C3 and/or C4 (n)</b>                 |                         | 6 (46%)                    | 5 (63%)               |
| <b>Type of skin lesion* (n)</b>             |                         |                            |                       |
| <b>ACLE</b>                                 |                         | 9 (69%)                    | 4 (50%)               |
| <b>SCLE</b>                                 |                         | 3 (23%)                    | 2 (25%)               |
| <b>DLE</b>                                  |                         | 3 (23%)                    | 5 (63%)               |
| <b>Lupus panniculitis</b>                   |                         | 0 (0%)                     | 1 (13%)               |
| <b>Lupus tumidis</b>                        |                         | 0 (0%)                     | 1 (13%)               |
| <b>CLASI-Activity, mean (SD)</b>            |                         | 6.9 (13.3)                 | 7.0 (6.0)             |
| <b>CLASI-Damage, mean (SD)</b>              |                         | 0 (0)                      | 7.5 (3.6)             |
| <b>Lupus nephritis class III or IV (n)</b>  |                         | 1 (8%)                     | 5 (63%)               |
| <b>SLEDAI, mean (SD)</b>                    |                         | 5.1 (5.5)                  | 6.9 (5.5)             |

\*Some patients had more than one lesion subtype in their rash history, all patients with ACLE in the “damaged” subgroup had concurrent hx of DLE.

\*\*Some antibody data was not available for each patient

| Gene       | log2FoldChange | padj        |
|------------|----------------|-------------|
| CXCL10     | 10.96312251    | 1.20698E-38 |
| CX3CL1     | 8.987904923    | 8.43699E-17 |
| CXCL8      | 8.918660889    | 1.38175E-79 |
| CXCL11     | 8.531203901    | 4.86983E-16 |
| CCL20      | 8.384389483    | 1.40164E-21 |
| OASL       | 8.270019379    | 1.80921E-34 |
| RSAD2      | 7.985986838    | 2.88898E-18 |
| GPR84      | 7.910249847    | 1.39939E-16 |
| CXCL3      | 7.767424611    | 7.40624E-39 |
| CCL5       | 7.676087616    | 6.54854E-30 |
| SELE       | 7.612795184    | 3.6729E-06  |
| CXCL1      | 7.089087118    | 7.96446E-53 |
| CCL8       | 7.052575603    | 8.14375E-13 |
| OAS1       | 6.681889017    | 2.30374E-24 |
| CMPK2      | 6.67813158     | 3.52338E-17 |
| CD69       | 6.666172172    | 4.72871E-08 |
| BCL2A1     | 6.54846124     | 6.36706E-17 |
| CSF3       | 6.537483717    | 3.50699E-06 |
| LINC01539  | 6.345032827    | 7.06158E-10 |
| MRGPRX3    | 6.328679599    | 1.34374E-07 |
| CXCL9      | 6.322765801    | 3.1765E-06  |
| G24578     | 6.16579548     | 1.19795E-07 |
| TLR2       | 6.020946263    | 5.08478E-14 |
| IL1B       | 5.898025243    | 2.144E-22   |
| KYNU       | 5.872770065    | 4.04523E-17 |
| GBP1P1     | 5.84305287     | 2.38692E-24 |
| GCH1       | 5.701138106    | 1.94228E-27 |
| GPR37L1    | 5.625879938    | 3.79436E-18 |
| KDR        | 5.389528672    | 2.78092E-18 |
| AC022509.2 | 5.383604904    | 1.8293E-23  |
| SSTR2      | 5.348856024    | 1.04911E-12 |
| NOD2       | 5.322246378    | 7.84288E-15 |
| CXCL2      | 5.292846997    | 8.12304E-20 |
| MEOX1      | 5.281162754    | 9.88496E-18 |
| DCLK3      | 5.277687047    | 2.19845E-21 |
| GBP4       | 5.192848744    | 6.08537E-23 |
| KCNK9      | 5.053905143    | 6.99698E-06 |
| CXCL6      | 5.015349453    | 5.87415E-30 |
| IL33       | 4.98707369     | 2.19424E-29 |
| CSF2       | 4.980017154    | 5.94518E-12 |
| IDO1       | 4.978205243    | 1.13222E-11 |
| TNF        | 4.967471711    | 1.91645E-15 |
| AC022509.1 | 4.959964363    | 0.000822975 |

|             |             |             |
|-------------|-------------|-------------|
| TNFAIP6     | 4.937679489 | 6.38778E-37 |
| IFIT2       | 4.834214274 | 3.71492E-20 |
| CCL1        | 4.827579427 | 0.004465009 |
| CXCL5       | 4.816486208 | 7.6107E-19  |
| TNFRSF9     | 4.780620698 | 5.07945E-13 |
| ACOD1       | 4.742449412 | 0.004702949 |
| AC083837.1  | 4.72277589  | 1.10285E-08 |
| IL4I1       | 4.620181962 | 3.49778E-16 |
| SLAMF8      | 4.605386806 | 2.37474E-14 |
| AL078604.2  | 4.53321298  | 1.8911E-05  |
| RASGEF1B    | 4.523143092 | 2.34102E-16 |
| RCSD1       | 4.518070308 | 5.61012E-11 |
| ICAM1       | 4.507297466 | 5.87415E-30 |
| CCL7        | 4.486516554 | 5.53081E-27 |
| AL356234.3  | 4.48002288  | 1.81582E-15 |
| G26207      | 4.474432021 | 1.24413E-21 |
| EXOC3L1     | 4.441205658 | 4.7613E-18  |
| ELOVL7      | 4.414177544 | 3.03775E-07 |
| KPNA7       | 4.406930628 | 5.85021E-07 |
| SLC7A2      | 4.361174768 | 1.6314E-09  |
| TNFSF10     | 4.351138434 | 3.07971E-11 |
| AL356414.1  | 4.346354803 | 0.000323786 |
| EFNA1       | 4.195145018 | 2.77895E-09 |
| CLDN14      | 4.18791239  | 2.1334E-23  |
| AC105450.1  | 4.181059334 | 0.000274432 |
| MIR3142HG   | 4.167551636 | 8.17811E-05 |
| TNFSF13B    | 4.163115431 | 4.55572E-13 |
| XLOC_005900 | 4.158681825 | 7.56519E-14 |
| NPTX1       | 4.135289622 | 2.73795E-18 |
| ELF3        | 4.080586883 | 1.37997E-06 |
| TNFAIP2     | 4.079698675 | 7.42037E-31 |
| IFI44L      | 4.061561943 | 1.58234E-20 |
| SAA2        | 3.994823374 | 4.56259E-14 |
| C15orf48    | 3.989667392 | 7.35015E-25 |
| CCL2        | 3.947305474 | 2.85629E-30 |
| TNFAIP3     | 3.916791755 | 9.54228E-31 |
| HERC5       | 3.896463055 | 1.49596E-10 |
| MX1         | 3.88722442  | 1.95876E-14 |
| ODAPH       | 3.861804952 | 3.93253E-06 |
| CYP7B1      | 3.858690723 | 3.61555E-22 |
| TCIM        | 3.822441673 | 4.83639E-37 |
| HAS1        | 3.815299586 | 4.39589E-25 |
| CD274       | 3.788344042 | 1.28007E-30 |

|            |             |             |
|------------|-------------|-------------|
| SPATA20P1  | 3.780978853 | 1.24303E-10 |
| SOD2       | 3.764409135 | 3.6577E-29  |
| CD38       | 3.761597687 | 0.001453888 |
| IFIT3      | 3.72847741  | 4.03713E-15 |
| IL1RN      | 3.721948854 | 3.06955E-11 |
| AL135818.2 | 3.711012723 | 3.26983E-07 |
| GBP7       | 3.700178364 | 0.024006421 |
| EGR2       | 3.695921554 | 9.62156E-47 |
| LINC02156  | 3.598833776 | 4.24078E-12 |
| HSPD1P6    | 3.597072152 | 2.57147E-09 |
| KCNF1      | 3.569926793 | 0.000244778 |
| PHOSPHO1   | 3.563229943 | 5.47083E-13 |
| GNA15      | 3.557291083 | 0.000769098 |
| LINC02392  | 3.550898499 | 4.46019E-05 |
| FTLP15     | 3.542168534 | 4.22466E-06 |
| TRAF1      | 3.532713213 | 7.41634E-22 |
| LIF        | 3.505275811 | 1.44381E-29 |
| CXCR5      | 3.493772516 | 1.57219E-05 |
| RORB       | 3.472429437 | 0.000688371 |
| AC011511.5 | 3.462895055 | 0.000304597 |
| EREG       | 3.443763245 | 1.42679E-07 |
| IFIH1      | 3.436003566 | 1.25141E-14 |
| FAM177B    | 3.417088869 | 1.65807E-21 |
| GBP5       | 3.415070397 | 3.64992E-12 |
| TTC4P1     | 3.409963062 | 1.95271E-11 |
| AP001434.1 | 3.37534852  | 1.03471E-09 |
| PIK3AP1    | 3.359806163 | 2.69778E-06 |
| AC068205.1 | 3.35437823  | 0.035134347 |
| DNAAF1     | 3.347431256 | 0.000174246 |
| NR4A3      | 3.341296478 | 7.49727E-13 |
| LCP2       | 3.337315567 | 0.036997889 |
| EXOC3L4    | 3.337277749 | 3.88584E-08 |
| AL135818.1 | 3.326635234 | 2.30343E-13 |
| PTGS2      | 3.304103782 | 6.83683E-22 |
| AP003119.3 | 3.282910234 | 2.00882E-11 |
| LINC00944  | 3.27775924  | 5.30311E-09 |
| GPR68      | 3.260683    | 1.34469E-59 |
| GOS2       | 3.245831277 | 3.35047E-15 |
| VCAM1      | 3.23805057  | 1.05723E-15 |
| BIRC3      | 3.213451778 | 4.60727E-19 |
| TP63       | 3.21272748  | 1.14596E-06 |
| CCL11      | 3.210979664 | 1.85401E-14 |
| CHI3L2     | 3.203996522 | 7.87479E-09 |

|             |             |             |
|-------------|-------------|-------------|
| IL6         | 3.20109248  | 5.84778E-30 |
| ICOSLG      | 3.196382596 | 4.57903E-09 |
| BATF2       | 3.186900389 | 1.16229E-07 |
| AC025580.2  | 3.182927423 | 9.02719E-10 |
| ESM1        | 3.166569224 | 4.63724E-32 |
| DDX58       | 3.154250467 | 4.25397E-16 |
| TRIM36      | 3.149162683 | 1.24597E-09 |
| CAVIN4      | 3.141320762 | 1.50482E-22 |
| XLOC_000133 | 3.132042686 | 0.000107233 |
| NLRP3       | 3.110633181 | 8.28915E-05 |
| LRRC4C      | 3.10053176  | 7.79124E-11 |
| ANGPTL4     | 3.095724855 | 3.12182E-39 |
| NKX3-1      | 3.089469885 | 7.30079E-39 |
| MX2         | 3.069154437 | 3.26549E-10 |
| IFIT1       | 3.063515154 | 9.02023E-11 |
| EGOT        | 3.04873265  | 0.010883476 |
| PKP1        | 3.045356977 | 5.32888E-09 |
| LIPG        | 3.043786581 | 4.01844E-22 |
| TRPA1       | 3.041437675 | 1.30721E-23 |
| AC022816.1  | 3.041002609 | 0.005749887 |
| HRASLS2     | 3.032318293 | 0.00702696  |
| TNFRSF4     | 3.001897344 | 0.000501277 |
| AKR1B15     | 2.994339745 | 3.21072E-05 |
| AC126178.1  | 2.991179813 | 2.78692E-07 |
| AC083837.2  | 2.978255409 | 7.49465E-15 |
| HOXD11      | 2.967687096 | 2.7842E-06  |
| CFAP161     | 2.950839629 | 5.18339E-07 |
| HSD11B1     | 2.915161065 | 9.2083E-09  |
| TGFA        | 2.907163916 | 4.10503E-09 |
| AC099489.1  | 2.903037665 | 0.00066502  |
| CFB         | 2.885734842 | 1.18808E-12 |
| SP6         | 2.878731077 | 2.8803E-05  |
| RTP4        | 2.878568266 | 1.19176E-10 |
| DNER        | 2.867876182 | 2.81104E-05 |
| IER3        | 2.840528128 | 1.49926E-44 |
| ZC3H12A     | 2.833132644 | 1.08856E-22 |
| AP000640.2  | 2.829011778 | 0.000561127 |
| NOTUM       | 2.82130535  | 0.008758794 |
| SOST        | 2.820516651 | 3.13822E-09 |
| PCDH17      | 2.813432657 | 0.000999879 |
| AC026461.3  | 2.813251836 | 0.019419242 |
| CHRNA9      | 2.799141222 | 1.53457E-13 |
| G25440      | 2.793762755 | 1.29733E-07 |

|            |             |             |
|------------|-------------|-------------|
| AC009950.1 | 2.789592695 | 5.66728E-06 |
| SPTBN5     | 2.785823936 | 8.07875E-05 |
| SLFN12L    | 2.782919379 | 0.002827269 |
| NKD1       | 2.780724156 | 6.10057E-08 |
| KANK4      | 2.780284251 | 1.16874E-19 |
| AC004988.1 | 2.774874747 | 9.5649E-05  |
| GRIP2      | 2.767642152 | 6.08491E-06 |
| TMEM52B    | 2.761007119 | 6.74835E-06 |
| RGS16      | 2.737454352 | 1.05052E-16 |
| SLC12A1    | 2.736036353 | 3.27124E-06 |
| USP18      | 2.735536146 | 5.55774E-12 |
| UNC13A     | 2.719045232 | 4.69176E-08 |
| MMP13      | 2.71492744  | 0.00094444  |
| AL355304.1 | 2.708413586 | 2.67718E-09 |
| PDZK1IP1   | 2.705771332 | 1.5351E-06  |
| RHBDL3     | 2.700551777 | 0.000157952 |
| HBEGF      | 2.693384021 | 9.30009E-29 |
| OAS3       | 2.675803923 | 4.49259E-11 |
| AC099552.1 | 2.670472113 | 0.001679802 |
| BTBD11     | 2.665738305 | 2.90512E-11 |
| ACTN2      | 2.64789284  | 0.025696598 |
| LINC01629  | 2.626242066 | 0.000284049 |
| OAS2       | 2.624808022 | 1.3331E-10  |
| FAM107A    | 2.622317878 | 0.008265495 |
| BDKRB1     | 2.615845633 | 3.01938E-20 |
| WNT1       | 2.611628006 | 0.047043295 |
| AC005549.3 | 2.608471826 | 0.000145767 |
| EBI3       | 2.603645679 | 2.68816E-06 |
| PEG13      | 2.596357193 | 1.19601E-05 |
| KLHL38     | 2.596328143 | 5.4644E-06  |
| FOSB       | 2.589365014 | 5.37429E-07 |
| USP30-AS1  | 2.585550347 | 8.45552E-05 |
| PKN2-AS1   | 2.576199052 | 7.07692E-07 |
| P2RY6      | 2.575757312 | 2.26677E-21 |
| IL20       | 2.573359548 | 8.19463E-08 |
| PLAC4      | 2.571647535 | 3.59327E-05 |
| NIPAL4     | 2.564147339 | 5.55899E-12 |
| AC012020.2 | 2.563508314 | 0.004278543 |
| AC131649.2 | 2.562832965 | 0.005266034 |
| STRA6      | 2.560396975 | 5.21469E-12 |
| IL22RA1    | 2.558872278 | 5.90985E-08 |
| SERPINA9   | 2.54418348  | 4.45107E-08 |
| RASL11B    | 2.524889904 | 1.60113E-20 |

|             |             |             |
|-------------|-------------|-------------|
| ITGB6       | 2.520826869 | 0.003609155 |
| CLIC6       | 2.519292026 | 9.0147E-06  |
| HERC6       | 2.511939093 | 9.07828E-09 |
| IFI44       | 2.504442082 | 4.63998E-16 |
| CFAP58-DT   | 2.497930002 | 1.21415E-09 |
| AL162274.1  | 2.494572376 | 1.36496E-05 |
| CCL3        | 2.476537004 | 0.001614972 |
| IL32        | 2.476253301 | 5.10239E-21 |
| P2RY2       | 2.469398319 | 5.72473E-06 |
| XLOC_002530 | 2.46894345  | 6.31816E-05 |
| OLR1        | 2.464999994 | 8.43699E-17 |
| BTC         | 2.464201702 | 0.006581804 |
| RELB        | 2.460876056 | 1.67221E-29 |
| DRAXIN      | 2.453494886 | 4.00805E-05 |
| AL445490.1  | 2.44921877  | 0.036336377 |
| XLOC_011331 | 2.445296535 | 0.000472029 |
| AC044781.1  | 2.442018227 | 0.000458879 |
| PPP4R4      | 2.440099078 | 1.44408E-07 |
| AIM2        | 2.439858277 | 0.004554534 |
| IFI30       | 2.436493682 | 0.01428142  |
| PAIP1P1     | 2.435686348 | 0.001628626 |
| G11966      | 2.433718191 | 0.01568741  |
| ROBO4       | 2.432561162 | 0.000292789 |
| LST1        | 2.424792215 | 9.81545E-05 |
| GBP1        | 2.423402271 | 4.26129E-12 |
| S1PR5       | 2.421977096 | 2.89821E-16 |
| EPSTI1      | 2.419112108 | 1.25916E-10 |
| HELZ2       | 2.417103243 | 5.42817E-10 |
| USP43       | 2.413964192 | 8.66053E-05 |
| CACNA1G     | 2.412535024 | 2.07703E-07 |
| PRAL        | 2.409148225 | 0.018538747 |
| AL158166.1  | 2.405633556 | 5.77024E-05 |
| XLOC_012049 | 2.402864286 | 1.15107E-09 |
| IL15RA      | 2.399991842 | 5.83242E-13 |
| CTSS        | 2.396492051 | 6.70085E-11 |
| HTR1D       | 2.385199187 | 9.69836E-07 |
| PGBD5       | 2.384395095 | 0.001064451 |
| XLOC_000358 | 2.382780594 | 4.41202E-07 |
| DCSTAMP     | 2.374211501 | 3.24946E-05 |
| IRAK2       | 2.369207476 | 1.51295E-19 |
| XLOC_000283 | 2.366950329 | 0.009341297 |
| AL033397.2  | 2.344356466 | 0.004438834 |
| AC110015.1  | 2.340690236 | 1.99936E-08 |



|             |             |             |
|-------------|-------------|-------------|
| AC099494.3  | 2.339840237 | 8.24066E-06 |
| AL049825.1  | 2.339562376 | 4.66667E-09 |
| LINC02470   | 2.323875292 | 0.002033755 |
| DIRC1       | 2.321170101 | 8.72448E-07 |
| IL11        | 2.316059046 | 1.68998E-18 |
| AL391056.1  | 2.313407988 | 2.46394E-13 |
| FAM124A     | 2.311535754 | 1.12135E-07 |
| TMEM51      | 2.311043899 | 5.96319E-12 |
| IL12RB1     | 2.309915788 | 0.000103463 |
| IL10RB-DT   | 2.30984346  | 1.32496E-06 |
| TSPAN2      | 2.307301719 | 1.64137E-39 |
| LINC01828   | 2.304717642 | 0.008739801 |
| IRF7        | 2.298016996 | 1.7458E-13  |
| TMEM88      | 2.276614254 | 0.027032293 |
| SLCO5A1     | 2.276390446 | 2.93039E-05 |
| RND1        | 2.274079082 | 0.000230714 |
| XLOC_003146 | 2.274011237 | 6.92815E-28 |
| LMO2        | 2.27189239  | 0.009680923 |
| MMP12       | 2.271115411 | 3.02251E-09 |
| AC009152.3  | 2.26589135  | 7.98831E-10 |
| AC018644.1  | 2.262273022 | 2.19647E-06 |
| KIAA0040    | 2.26114438  | 4.55338E-20 |
| TBILA       | 2.260064345 | 0.006198066 |
| PRRG4       | 2.259275596 | 0.011231705 |
| AC005840.3  | 2.25760646  | 0.003293904 |
| CLDN1       | 2.248359157 | 1.00268E-10 |
| SMAD7       | 2.238934414 | 7.82202E-29 |
| AC005899.8  | 2.229094592 | 0.000509566 |
| TLR5        | 2.215778845 | 7.17766E-06 |
| XIRP1       | 2.21529732  | 0.008338425 |
| AC006249.1  | 2.210869666 | 8.74562E-05 |
| LDLRAD4     | 2.205298832 | 1.60727E-14 |
| AL357673.2  | 2.19736469  | 0.005576723 |
| AC097451.1  | 2.19193582  | 2.09642E-10 |
| ST6GAL2     | 2.190629416 | 0.001981018 |
| AC099494.1  | 2.188402112 | 6.68324E-06 |
| SNX10       | 2.185119187 | 0.00889055  |
| TSLP        | 2.182901957 | 3.92015E-07 |
| PTHLH       | 2.182348416 | 5.23327E-17 |
| CD83        | 2.180449491 | 1.19176E-10 |
| AC004817.3  | 2.178917113 | 0.000149371 |
| KCTD11      | 2.178612167 | 2.58618E-34 |
| PLA1A       | 2.175199485 | 0.029617134 |

|             |             |             |
|-------------|-------------|-------------|
| BCL2L14     | 2.172946517 | 0.007742678 |
| AC016397.2  | 2.169861519 | 5.69109E-08 |
| C1QTNF1     | 2.156774519 | 4.31776E-14 |
| CACNA1G-AS1 | 2.155806738 | 0.016728276 |
| TRABD2B     | 2.154847781 | 0.02737114  |
| CD70        | 2.154080949 | 4.97388E-10 |
| TRAPPC3L    | 2.146115164 | 6.93042E-05 |
| AC007686.1  | 2.13763389  | 0.000105618 |
| RASL12      | 2.137204347 | 0.001014711 |
| NFATC2      | 2.130009704 | 9.04457E-13 |
| HCK         | 2.124511675 | 2.10533E-08 |
| C3AR1       | 2.122297791 | 0.001069092 |
| PARP12      | 2.119661942 | 8.12304E-20 |
| BHLHE40     | 2.117330543 | 2.53109E-22 |
| DHX58       | 2.115753499 | 3.50405E-10 |
| AC080014.1  | 2.109240554 | 1.22034E-05 |
| ETV7        | 2.109027486 | 3.54396E-08 |
| ATF3        | 2.10842272  | 1.76757E-12 |
| NFKB2       | 2.105493957 | 1.00736E-18 |
| NFKBIZ      | 2.103254516 | 6.43113E-27 |
| MMP1        | 2.102868901 | 3.35214E-12 |
| IL34        | 2.099572768 | 3.05595E-09 |
| TYMP        | 2.095776796 | 5.76036E-14 |
| SOCS1       | 2.093054482 | 8.96317E-05 |
| TLR3        | 2.092155666 | 4.5932E-07  |
| LEFTY2      | 2.084457438 | 0.001300834 |
| AP002852.1  | 2.07318675  | 9.32897E-06 |
| QRFP        | 2.072144773 | 7.85824E-05 |
| P2RY1       | 2.071823231 | 0.000370851 |
| TFPI2       | 2.071737506 | 3.02351E-21 |
| BEST3       | 2.069088114 | 0.001815527 |
| AC131009.2  | 2.058635218 | 0.009359025 |
| THEMIS2     | 2.055051406 | 1.47985E-11 |
| NR4A2       | 2.051277352 | 4.57903E-09 |
| CYP27B1     | 2.049310962 | 3.27546E-06 |
| AL024508.1  | 2.034282807 | 0.021811603 |
| SLC39A14    | 2.021941604 | 6.12529E-20 |
| CFAP45      | 2.019920411 | 1.33734E-07 |
| HLA-DOB     | 2.019240476 | 0.005574733 |
| DDX60       | 2.014326966 | 1.8565E-12  |
| MFSD2A      | 2.008836076 | 3.38853E-12 |
| SEMA4D      | 1.993248155 | 4.3651E-07  |
| KCNJ15      | 1.990874123 | 8.68017E-24 |

|            |             |             |
|------------|-------------|-------------|
| C1orf147   | 1.986919038 | 0.024289653 |
| RELT       | 1.983531379 | 1.58065E-20 |
| AC009152.1 | 1.982819793 | 0.027280807 |
| SLC22A2    | 1.982574551 | 0.026714397 |
| XAF1       | 1.981437924 | 1.46418E-16 |
| FYB1       | 1.979500895 | 0.005468718 |
| FAM19A3    | 1.976727424 | 4.42265E-05 |
| CLEC1A     | 1.971668233 | 8.66053E-05 |
| FOXP1-IT1  | 1.970214862 | 5.80274E-07 |
| PARP14     | 1.967827556 | 7.34789E-12 |
| 44258      | 1.966698881 | 1.08865E-23 |
| AC008083.1 | 1.966551819 | 0.000106236 |
| RN7SL368P  | 1.964762231 | 0.013374582 |
| IFNE       | 1.963226455 | 0.000102409 |
| PMEPA1     | 1.958450413 | 6.84333E-32 |
| IRF1       | 1.956186029 | 1.69986E-08 |
| SLC12A7    | 1.946743894 | 4.38916E-10 |
| RN7SL834P  | 1.944622742 | 0.024774205 |
| TNFAIP8    | 1.943095395 | 1.03557E-18 |
| AC020913.3 | 1.942236861 | 0.006473472 |
| AMPD3      | 1.937572107 | 2.92397E-14 |
| PHACTR1    | 1.93702651  | 1.46534E-16 |
| NFKBIE     | 1.935540978 | 4.13199E-11 |
| XXYLT1-AS2 | 1.935522674 | 0.000874584 |
| CD34       | 1.934329729 | 1.14712E-08 |
| TRIB1      | 1.934188455 | 1.33562E-06 |
| GFPT2      | 1.933733238 | 2.00055E-32 |
| RNF19B     | 1.933218294 | 1.23022E-14 |
| ADAP1      | 1.93301867  | 3.79939E-11 |
| SLC19A2    | 1.932621764 | 1.54294E-29 |
| SAMD9L     | 1.924003048 | 3.04428E-11 |
| BMP2       | 1.92240212  | 1.03296E-05 |
| CSRNP1     | 1.920267225 | 8.92345E-28 |
| AL592546.1 | 1.919878816 | 0.011618051 |
| ISG20      | 1.919340198 | 1.25003E-07 |
| CCL4       | 1.917584213 | 0.019684448 |
| LINC00640  | 1.916386349 | 0.000156834 |
| LINC00622  | 1.916313347 | 0.003845738 |
| LINC02086  | 1.912103294 | 1.58903E-05 |
| WWC1       | 1.911666268 | 1.14447E-10 |
| SAA1       | 1.909163708 | 5.822E-09   |
| TNIP3      | 1.907662886 | 1.52129E-06 |
| IL18BP     | 1.905076858 | 5.99773E-07 |

|             |             |             |
|-------------|-------------|-------------|
| RASSF5      | 1.904486754 | 1.7818E-05  |
| HSPA6       | 1.903769114 | 0.025382144 |
| MSC         | 1.903633749 | 7.71179E-19 |
| VNN1        | 1.90086761  | 0.003198674 |
| RHOH        | 1.899934519 | 0.001669661 |
| AC009949.1  | 1.898303789 | 0.009572677 |
| AL158166.2  | 1.896554044 | 0.032924027 |
| XLOC_007602 | 1.89357291  | 7.77086E-05 |
| ENC1        | 1.892765284 | 3.13151E-37 |
| LRRC8C      | 1.892495783 | 1.07559E-30 |
| SERPINB2    | 1.890564154 | 1.50007E-11 |
| LRIG1       | 1.890234739 | 1.70727E-19 |
| PROX1       | 1.889678881 | 0.000139541 |
| TBX3        | 1.887721742 | 1.9816E-39  |
| AL356234.1  | 1.884014154 | 0.004232781 |
| DLL1        | 1.882239545 | 0.000162148 |
| APOL4       | 1.879974567 | 0.003180022 |
| SPACA6P-AS  | 1.877491501 | 0.011755896 |
| JUNB        | 1.875264973 | 5.60712E-27 |
| PTGER2      | 1.874199412 | 4.53451E-09 |
| AP003555.2  | 1.872245731 | 0.000361982 |
| AC243571.2  | 1.871163476 | 0.003484615 |
| TNIP1       | 1.86945669  | 7.99814E-15 |
| XLOC_013952 | 1.866841842 | 4.22466E-06 |
| AC083949.1  | 1.860475204 | 0.022575665 |
| CLEC12A-AS1 | 1.860193252 | 6.68471E-08 |
| CAMK2A      | 1.859688267 | 1.92833E-05 |
| ADAMTS4     | 1.856134174 | 3.73439E-31 |
| SERPINA1    | 1.851090363 | 0.000260481 |
| RNU6-60P    | 1.849171304 | 6.76981E-05 |
| AL021408.2  | 1.843823182 | 0.000169667 |
| AC034223.1  | 1.836027425 | 0.004329066 |
| ANGPTL7     | 1.833357424 | 1.04144E-07 |
| AL139807.1  | 1.83089513  | 0.004657015 |
| ITGA2       | 1.826442103 | 3.11625E-24 |
| AC013451.2  | 1.821820624 | 0.000244395 |
| MMP8        | 1.821060337 | 0.003893202 |
| SAMD9       | 1.820814124 | 9.32558E-13 |
| PDGFB       | 1.814703433 | 0.012479274 |
| HMOX1       | 1.812769583 | 9.28994E-35 |
| MTSS1       | 1.805513279 | 5.66739E-08 |
| AL355102.4  | 1.803808484 | 0.005188722 |
| AL355102.1  | 1.802626004 | 0.014138228 |

|             |             |             |
|-------------|-------------|-------------|
| ZNF259P1    | 1.799985722 | 1.83506E-23 |
| DDX60L      | 1.798012251 | 5.58135E-13 |
| ARHGEF16    | 1.796617887 | 0.004655234 |
| CEACAM1     | 1.795524913 | 0.020632062 |
| NFKBIA      | 1.791899538 | 2.11049E-16 |
| IL1A        | 1.790819655 | 0.013807572 |
| G41319      | 1.789753114 | 1.76321E-06 |
| DGKI        | 1.789072102 | 4.31513E-26 |
| AL139405.1  | 1.788599937 | 0.000546989 |
| LINC01140   | 1.786293525 | 9.38324E-07 |
| EDN1        | 1.784728269 | 2.32431E-24 |
| HMG2P46     | 1.783696304 | 6.19568E-05 |
| SLC16A6     | 1.780446318 | 0.01465372  |
| GBP2        | 1.779669249 | 5.80421E-09 |
| RBM47       | 1.769185976 | 5.42322E-07 |
| NCOA7       | 1.767846969 | 2.1083E-09  |
| AL357992.1  | 1.767384765 | 4.1101E-08  |
| SLC16A9     | 1.766869625 | 0.001830939 |
| SRSF12      | 1.765143946 | 7.32974E-10 |
| NFKB1       | 1.757661604 | 3.84587E-23 |
| NCF2        | 1.753271527 | 5.87467E-11 |
| XLOC_007190 | 1.748734499 | 0.003016546 |
| SMOX        | 1.747426625 | 1.06711E-20 |
| APOL1       | 1.746593323 | 4.09635E-09 |
| PIK3CD      | 1.746567431 | 3.44663E-24 |
| RN7SL683P   | 1.741483228 | 0.002018757 |
| XLOC_009415 | 1.739102002 | 0.015068922 |
| AC003092.1  | 1.736304487 | 4.21321E-07 |
| GPR183      | 1.73420417  | 1.66022E-07 |
| RIPK2       | 1.732121585 | 5.4202E-23  |
| CCDC184     | 1.730205801 | 1.80207E-11 |
| AL157937.1  | 1.728166079 | 0.001838434 |
| LINC00222   | 1.725963825 | 0.010867031 |
| AC004974.1  | 1.725768488 | 0.027015828 |
| AC079174.1  | 1.723321246 | 0.003612929 |
| AC004832.5  | 1.714071261 | 1.02346E-05 |
| LINC00515   | 1.712697847 | 0.000155968 |
| ITPRIP      | 1.711002552 | 2.53492E-26 |
| MYO10       | 1.709813241 | 1.29139E-38 |
| C5orf56     | 1.707374554 | 1.16229E-07 |
| AC097634.1  | 1.706902971 | 0.000287647 |
| BATF3       | 1.705930146 | 0.005436214 |
| P3H2        | 1.701054434 | 2.22742E-14 |

|             |             |             |
|-------------|-------------|-------------|
| G14029      | 1.700493817 | 0.001582668 |
| L1TD1       | 1.698209337 | 2.24088E-12 |
| MCC         | 1.694516672 | 1.47358E-22 |
| SNORD39     | 1.69420235  | 2.60677E-05 |
| SUSD6       | 1.693534805 | 3.89393E-34 |
| LAMC2       | 1.69347441  | 3.66151E-14 |
| AC109347.2  | 1.692525117 | 0.002201757 |
| LINC02085   | 1.692229206 | 0.01161262  |
| PLSCR1      | 1.688511745 | 2.1819E-09  |
| RRAD        | 1.679101925 | 5.75518E-13 |
| PFKFB3      | 1.676070511 | 4.83639E-37 |
| RPL35AP32   | 1.674124269 | 0.041482577 |
| NR4A1       | 1.673995624 | 2.16289E-11 |
| HOXC13-AS   | 1.66393762  | 9.95252E-06 |
| EFR3B       | 1.662094385 | 5.6851E-13  |
| DHRS2       | 1.661722051 | 8.94979E-07 |
| ISG15       | 1.661539474 | 3.98715E-08 |
| LINC01711   | 1.661144323 | 0.002371503 |
| HIVEP3      | 1.659408863 | 8.20287E-19 |
| C3orf52     | 1.656741883 | 1.3182E-28  |
| AP000695.1  | 1.655373463 | 3.40355E-06 |
| AP004609.1  | 1.653344269 | 0.02139178  |
| ADGRG1      | 1.652944114 | 7.20902E-07 |
| XLOC_001195 | 1.648933607 | 0.002361967 |
| ACKR3       | 1.648278413 | 4.56434E-10 |
| WTAPP1      | 1.648064369 | 1.31687E-06 |
| NPAS2       | 1.646981166 | 3.09642E-14 |
| AP001970.1  | 1.646030016 | 0.012704651 |
| CALHM6      | 1.64361074  | 4.66589E-06 |
| APOL3       | 1.64180581  | 2.24016E-05 |
| CSF1R       | 1.636772681 | 1.1695E-09  |
| C3          | 1.636053111 | 1.22944E-07 |
| TAP1        | 1.635269515 | 2.51368E-10 |
| TNFSF15     | 1.624246023 | 0.004523095 |
| LGALS9      | 1.619260088 | 1.20513E-07 |
| WNT10B      | 1.614500467 | 0.000795108 |
| AC116366.1  | 1.610869454 | 0.002647358 |
| MFS4A       | 1.607927022 | 0.034986649 |
| LINC01359   | 1.605631146 | 0.039084399 |
| AC025186.1  | 1.603891235 | 0.036420907 |
| XYLT1       | 1.601953702 | 3.38289E-33 |
| AC107021.2  | 1.597744093 | 2.93178E-15 |
| POU3F2      | 1.59477258  | 0.014298248 |

|             |             |             |
|-------------|-------------|-------------|
| GBP3        | 1.59131831  | 5.37602E-09 |
| CETP        | 1.590956293 | 0.019196943 |
| PDPN        | 1.588381617 | 5.36639E-17 |
| AC007728.2  | 1.58835272  | 0.001311952 |
| APOL2       | 1.586949705 | 2.35585E-08 |
| AC093567.1  | 1.581639891 | 0.000385273 |
| NECTIN4     | 1.580269662 | 0.000563281 |
| AL691420.1  | 1.579310859 | 3.23218E-06 |
| PTPRE       | 1.576167442 | 1.36475E-13 |
| STX11       | 1.575208169 | 4.46019E-05 |
| HS3ST3B1    | 1.572921649 | 2.82218E-31 |
| AQP9        | 1.572319627 | 0.000108767 |
| IL23A       | 1.567984911 | 1.80021E-05 |
| GCSAM       | 1.566863452 | 0.03604777  |
| LRRTM2      | 1.565712193 | 3.28652E-06 |
| RAP1GAP2    | 1.565260853 | 3.02117E-06 |
| MMP10       | 1.565190664 | 0.000793282 |
| KIAA1755    | 1.564044951 | 1.61955E-07 |
| SSBP3-AS1   | 1.562901004 | 0.006588639 |
| LAMB3       | 1.560157217 | 9.53886E-09 |
| TRIM25      | 1.555453883 | 1.81625E-10 |
| ZNFX1       | 1.547428516 | 1.6479E-12  |
| LINC00525   | 1.546899267 | 0.010828602 |
| TNFRSF18    | 1.545256542 | 0.000689408 |
| DLX2        | 1.544684222 | 1.33734E-07 |
| COL27A1     | 1.544615743 | 7.47498E-38 |
| XLOC_014038 | 1.54340843  | 0.000429764 |
| LINC01686   | 1.543399853 | 0.00090075  |
| ANO1        | 1.540051094 | 0.001260862 |
| LRRN3       | 1.539747739 | 9.50103E-36 |
| IBSP        | 1.538570119 | 0.00151914  |
| IFI6        | 1.538543088 | 2.27836E-07 |
| RPA4        | 1.536104005 | 0.022784124 |
| ANGPTL1     | 1.533620459 | 1.14992E-05 |
| AC087164.1  | 1.532618881 | 0.007737571 |
| ARL9        | 1.531662668 | 8.98043E-05 |
| CHST15      | 1.527470555 | 2.38914E-17 |
| PTGES       | 1.527366897 | 9.08179E-10 |
| STAT5A      | 1.526008289 | 6.79634E-11 |
| AC090617.2  | 1.522833924 | 0.020713549 |
| AL357060.1  | 1.515944727 | 5.58917E-05 |
| ACHE        | 1.510440761 | 0.011073096 |
| AC124319.4  | 1.507401463 | 0.0016223   |



|            |             |             |
|------------|-------------|-------------|
| FMNL3      | 1.504862661 | 3.08466E-28 |
| SECTM1     | 1.504220516 | 0.000193021 |
| TRAF3      | 1.504039041 | 1.36212E-29 |
| AL021707.6 | 1.502316366 | 7.54931E-06 |
| TRIM21     | 1.500501904 | 4.89707E-10 |
| KDM6B      | 1.491692804 | 1.05723E-15 |
| NUAK2      | 1.491415833 | 1.44847E-10 |
| NGF        | 1.491279603 | 9.80927E-28 |
| AC068860.1 | 1.489995739 | 0.002969704 |
| NOCT       | 1.488492242 | 3.44829E-30 |
| LEF1       | 1.483087833 | 3.70586E-10 |
| CLDN4      | 1.480292381 | 2.71673E-06 |
| GPR146     | 1.478779067 | 5.93353E-06 |
| LHX8       | 1.478297181 | 0.002860033 |
| NAMPTP1    | 1.47571304  | 1.48622E-10 |
| AL078590.2 | 1.470570052 | 0.016859308 |
| KIF5C      | 1.467824425 | 0.000323717 |
| ZC3HAV1    | 1.467092725 | 5.80834E-10 |
| TNFSF18    | 1.466422722 | 6.99712E-07 |
| AL136295.2 | 1.466128548 | 0.000230399 |
| AC022079.1 | 1.465867582 | 0.023855137 |
| AL359752.1 | 1.464945355 | 3.85589E-08 |
| ARHGAP27   | 1.460008162 | 0.000438581 |
| GIMAP2     | 1.459163976 | 0.013974009 |
| AC067751.1 | 1.455136547 | 5.2087E-05  |
| AC099506.1 | 1.455008671 | 0.009382298 |
| FZD8       | 1.454526581 | 1.11808E-09 |
| L3MBTL4    | 1.452360043 | 0.036421887 |
| CNTN1      | 1.451953712 | 5.98246E-05 |
| NTN1       | 1.448226991 | 0.000198199 |
| POU2F2     | 1.446786172 | 1.28229E-10 |
| MAFF       | 1.445266479 | 2.32314E-15 |
| MIR155HG   | 1.444595849 | 1.32442E-06 |
| AC109588.1 | 1.441291375 | 0.004877989 |
| MT2A       | 1.439144719 | 3.44831E-15 |
| ZSWIM4     | 1.438323847 | 1.58629E-07 |
| G38640     | 1.438025571 | 4.55158E-06 |
| MYOCD      | 1.437067689 | 3.1073E-08  |
| RARRES3    | 1.436047385 | 6.25264E-07 |
| AL157702.2 | 1.435904215 | 0.002223149 |
| PMAIP1     | 1.435822318 | 1.05826E-08 |
| RNA5SP385  | 1.433748812 | 0.000439308 |
| SAT1       | 1.431723503 | 1.49663E-14 |

|            |             |             |
|------------|-------------|-------------|
| TDRD7      | 1.431328936 | 4.7487E-05  |
| AL356273.3 | 1.431218415 | 0.000313209 |
| SLFNL1     | 1.430494598 | 0.024552892 |
| GZMK       | 1.426962117 | 0.000229636 |
| NGF-AS1    | 1.426642208 | 0.018487185 |
| CSF1       | 1.425888714 | 7.9446E-07  |
| SAMHD1     | 1.424691454 | 1.57646E-08 |
| REL        | 1.422279118 | 2.42942E-17 |
| CHST11     | 1.412176573 | 7.09411E-31 |
| MOB3B      | 1.41176882  | 0.001492996 |
| SNRPGP5    | 1.40655628  | 0.032915653 |
| PCDH19     | 1.404485246 | 3.69457E-06 |
| SLC41A2    | 1.403739823 | 3.48197E-24 |
| FGFR3      | 1.403197251 | 0.022470964 |
| SLC25A28   | 1.402189534 | 1.05349E-08 |
| CACHD1     | 1.399359165 | 5.06536E-16 |
| TIFA       | 1.397108811 | 1.91189E-12 |
| YEATS2-AS1 | 1.397105028 | 0.042628258 |
| PRG4       | 1.394552881 | 0.001375144 |
| RIPOR3     | 1.392998865 | 1.00844E-07 |
| GLDN       | 1.392678808 | 0.00010876  |
| TMOD1      | 1.391577492 | 0.032278221 |
| RFLNA      | 1.391186262 | 1.64909E-12 |
| PPP1R14C   | 1.390789286 | 0.001371817 |
| FGF18      | 1.390072945 | 0.007372273 |
| HCG20      | 1.388683125 | 0.027936536 |
| THBS4      | 1.38269311  | 5.0516E-05  |
| PID1       | 1.377627077 | 4.91161E-13 |
| AC022509.3 | 1.373961861 | 0.00773412  |
| PAK3       | 1.367000101 | 0.015415399 |
| AL603832.1 | 1.366452615 | 0.007040188 |
| GPRC5B     | 1.365197239 | 5.45691E-06 |
| PLEK2      | 1.362215506 | 9.63145E-21 |
| EDARADD    | 1.360995913 | 2.03932E-06 |
| SLC7A8     | 1.360405862 | 3.99521E-17 |
| CIITA      | 1.35856302  | 0.00362064  |
| CD82       | 1.356030038 | 2.34562E-07 |
| SUSD4      | 1.353867951 | 0.001182927 |
| ANXA13     | 1.349585167 | 0.025189318 |
| INHBA      | 1.342967979 | 2.75258E-17 |
| HIVEP2     | 1.341547352 | 1.97171E-28 |
| AGAP9      | 1.335702958 | 0.022066953 |
| SEC14L2    | 1.333190525 | 7.24726E-25 |

|             |             |             |
|-------------|-------------|-------------|
| AC124276.2  | 1.331332939 | 8.43699E-17 |
| SP110       | 1.329401035 | 4.48642E-07 |
| AFF2        | 1.328467873 | 3.98259E-05 |
| IL24        | 1.327350488 | 0.005917797 |
| WWC2-AS2    | 1.325876567 | 0.000458748 |
| RSPO3       | 1.325156407 | 1.69012E-05 |
| MIR503      | 1.3237037   | 1.0393E-06  |
| RNU6-1208P  | 1.323386205 | 0.039374511 |
| BDKRB2      | 1.322538075 | 3.90431E-08 |
| C5AR2       | 1.321385738 | 5.72084E-05 |
| XLOC_008812 | 1.32044775  | 0.037098282 |
| SLC22A3     | 1.316751967 | 0.002249188 |
| CTGF        | 1.316431312 | 1.15415E-05 |
| TSKU        | 1.313801811 | 1.99658E-21 |
| KIAA1024    | 1.31265074  | 4.34843E-11 |
| HDX         | 1.309678059 | 2.85403E-12 |
| NIPAL1      | 1.309118335 | 0.0043344   |
| AC012462.1  | 1.307258534 | 9.837E-05   |
| SNCAIP      | 1.306330425 | 8.77949E-08 |
| PLK3        | 1.305572787 | 3.38992E-20 |
| MGAM        | 1.305570477 | 0.001611294 |
| PTX3        | 1.298036958 | 1.80747E-05 |
| NAMPT       | 1.297364869 | 8.27141E-14 |
| CHRNA1      | 1.294513871 | 0.018718606 |
| RNU6-301P   | 1.289738949 | 0.012725256 |
| AF117829.1  | 1.288334943 | 2.54337E-08 |
| SPHK1       | 1.288136725 | 6.15129E-19 |
| BST2        | 1.287428224 | 0.000328366 |
| AC073410.1  | 1.287312363 | 0.002213805 |
| KDM7A       | 1.287138105 | 3.73024E-13 |
| ART3        | 1.287082664 | 0.049987404 |
| GLIS3       | 1.284060734 | 1.72315E-20 |
| PNPT1       | 1.283349567 | 1.29266E-12 |
| ITGB3       | 1.280800072 | 5.46082E-09 |
| EDNRB       | 1.279819931 | 0.000325375 |
| KBTBD8      | 1.279624524 | 0.000633526 |
| ABTB2       | 1.277481087 | 3.28472E-09 |
| SLFN5       | 1.276796166 | 1.22963E-09 |
| TAF4B       | 1.275129852 | 2.88871E-06 |
| SLCO3A1     | 1.274891588 | 1.02291E-13 |
| DGKG        | 1.274698725 | 0.014208388 |
| AC092800.1  | 1.270967886 | 0.030248509 |
| AC104389.4  | 1.269757902 | 0.038999883 |

|              |             |             |
|--------------|-------------|-------------|
| XLOC_011309  | 1.268128538 | 0.006978202 |
| BHLHE40-AS1  | 1.2671572   | 0.000218445 |
| MIR503HG     | 1.266854764 | 5.67001E-07 |
| PARP10       | 1.266177993 | 1.91692E-05 |
| LINC01411    | 1.265744846 | 0.014643438 |
| MYOM3        | 1.263663127 | 0.002581167 |
| AC097059.2   | 1.261474324 | 0.005141691 |
| AP000442.2   | 1.260513328 | 0.029733421 |
| AC129507.1   | 1.258604183 | 0.009036948 |
| RHBDF2       | 1.258583301 | 1.15414E-09 |
| PRDM16       | 1.258081347 | 0.007098564 |
| EPHB2        | 1.257975398 | 1.4795E-09  |
| CBFB         | 1.255591177 | 1.64791E-16 |
| PARP15       | 1.255078003 | 0.005766412 |
| DTX3L        | 1.254882669 | 2.02747E-06 |
| LNC SRLR     | 1.25322702  | 4.16673E-05 |
| SLC43A2      | 1.251977024 | 5.17751E-08 |
| ERV MER34-1  | 1.250843542 | 0.013089362 |
| MSX2         | 1.248864343 | 0.040702769 |
| HLA-F        | 1.248543209 | 2.77741E-07 |
| SLC1A3       | 1.247558611 | 9.91733E-11 |
| NEDD9        | 1.247063042 | 1.85905E-40 |
| FGF2         | 1.246492579 | 3.77116E-25 |
| BEAN1        | 1.244864871 | 0.011110195 |
| NINJ1        | 1.244169172 | 1.33737E-08 |
| CAPN3        | 1.240779401 | 0.038368369 |
| SLC2A6       | 1.237799475 | 6.39001E-14 |
| AC009404.1   | 1.23640763  | 1.54634E-15 |
| AC092718.3   | 1.235635441 | 0.000772456 |
| LINC01943    | 1.234633846 | 7.19612E-16 |
| ZNF267       | 1.234633674 | 9.52364E-23 |
| RPL7L1P9     | 1.233921369 | 0.003751053 |
| PANX1        | 1.233151643 | 5.55774E-12 |
| IL15         | 1.233148105 | 4.92231E-09 |
| RASD2        | 1.230259954 | 9.61456E-05 |
| AC105105.3   | 1.229350628 | 0.027112583 |
| AL158050.1   | 1.228860529 | 0.042871197 |
| NKILA        | 1.223343148 | 1.2658E-06  |
| IFNAR2       | 1.221016151 | 3.41337E-11 |
| PRICKLE2-AS3 | 1.217772494 | 0.004985575 |
| SLC39A8      | 1.217445179 | 1.69839E-06 |
| LAP3         | 1.216794077 | 8.72794E-09 |
| ESR1         | 1.214954432 | 0.017014999 |

|             |             |             |
|-------------|-------------|-------------|
| AC087623.1  | 1.213742701 | 0.04645006  |
| RNF122      | 1.213537399 | 2.00882E-11 |
| PRDM1       | 1.21225153  | 2.21929E-34 |
| FOXO3       | 1.210871757 | 2.00055E-32 |
| AC037459.2  | 1.209406106 | 0.0032037   |
| GPR75       | 1.209355173 | 0.015931804 |
| AC017002.1  | 1.207671093 | 1.59461E-10 |
| TLR1        | 1.206603173 | 0.00016837  |
| SYTL3       | 1.206285304 | 1.752E-08   |
| SLC28A3     | 1.201442832 | 0.019433212 |
| TMEM217     | 1.199177888 | 7.63654E-07 |
| G12163      | 1.198234718 | 0.007737571 |
| AL355355.1  | 1.19767066  | 0.017976091 |
| ARRDC2      | 1.197153321 | 5.04115E-10 |
| SHISAL1     | 1.196736209 | 2.42161E-18 |
| NAV2        | 1.19624729  | 3.97902E-35 |
| AL078644.1  | 1.195748082 | 0.015594967 |
| SQOR        | 1.194682022 | 1.05261E-11 |
| RASD1       | 1.194629014 | 1.58175E-06 |
| CNGA3       | 1.194484121 | 0.014479283 |
| LAMA3       | 1.191959113 | 9.63231E-07 |
| AL596325.2  | 1.191928336 | 4.90341E-05 |
| LINC01239   | 1.190255658 | 0.01508876  |
| AC018628.1  | 1.187214415 | 2.94801E-05 |
| LYPD3       | 1.187146214 | 0.00087767  |
| POLH-AS1    | 1.186980037 | 0.030914942 |
| AC017002.3  | 1.185933481 | 3.10312E-07 |
| PML         | 1.185599695 | 3.684E-09   |
| CGAS        | 1.185184047 | 3.76452E-11 |
| AC107021.1  | 1.185119532 | 0.001420226 |
| TJP2        | 1.184239331 | 4.70581E-05 |
| XLOC_008957 | 1.181967683 | 0.017362169 |
| NOX4        | 1.178548062 | 1.81141E-15 |
| MYO7B       | 1.175288918 | 3.60401E-05 |
| COL22A1     | 1.175040918 | 0.029165999 |
| FAM49A      | 1.174352462 | 0.003112239 |
| FRMD4A      | 1.173902321 | 6.10047E-11 |
| PPARD       | 1.171364159 | 2.74619E-14 |
| ERN1        | 1.170783225 | 3.03424E-16 |
| PLXNA2      | 1.170590033 | 7.86392E-09 |
| PRICKLE2    | 1.1704811   | 1.85795E-20 |
| RHEBL1      | 1.168957871 | 3.02453E-05 |
| ARNTL2      | 1.166702282 | 3.06851E-08 |

|            |             |             |
|------------|-------------|-------------|
| AL139022.1 | 1.165373623 | 0.020474906 |
| ZCCHC2     | 1.164896694 | 4.7654E-09  |
| SPSB1      | 1.164749962 | 1.95638E-10 |
| JAK2       | 1.164478246 | 5.55729E-06 |
| PSMB9      | 1.162509549 | 1.03075E-06 |
| AL672207.1 | 1.161687353 | 0.049662319 |
| DRP2       | 1.161503786 | 0.000742296 |
| AC093908.1 | 1.16022588  | 0.003528975 |
| AC024909.2 | 1.159783565 | 0.048387635 |
| CIART      | 1.15624655  | 7.31017E-15 |
| AL132656.4 | 1.15458836  | 2.68997E-05 |
| CFLAR-AS1  | 1.154420216 | 0.003154203 |
| APOL6      | 1.153488462 | 2.00311E-05 |
| APOBEC3G   | 1.15182425  | 1.32297E-05 |
| G36605     | 1.15081278  | 0.00060876  |
| OGFR       | 1.149014962 | 3.77848E-06 |
| AC245100.8 | 1.145901062 | 4.31334E-08 |
| PSTPIP2    | 1.144474594 | 7.4794E-16  |
| ANGPT4     | 1.144137602 | 0.011230153 |
| CDKN2B     | 1.143295829 | 1.56272E-15 |
| PCDH9      | 1.140021083 | 3.26068E-15 |
| S1PR3      | 1.138923127 | 4.03713E-15 |
| AL354732.1 | 1.135974416 | 0.000989137 |
| CCDC88C    | 1.134267912 | 0.002965571 |
| AL359711.2 | 1.133272178 | 0.038963263 |
| AC078785.1 | 1.132745083 | 0.010961066 |
| TAP2       | 1.131580508 | 1.94428E-09 |
| TBXAS1     | 1.131408228 | 1.85581E-05 |
| RELN       | 1.131177939 | 0.045026579 |
| AC005224.3 | 1.131086575 | 0.000501006 |
| CD7        | 1.129776988 | 0.026168021 |
| STARD4     | 1.129144716 | 6.08537E-23 |
| BAK1P1     | 1.128132503 | 0.032680002 |
| AP005136.2 | 1.126177439 | 0.032612245 |
| WNK4       | 1.124922122 | 1.74112E-09 |
| KY         | 1.123773254 | 0.020672165 |
| TRIM14     | 1.122516297 | 8.58643E-07 |
| KDM7A-DT   | 1.122238771 | 9.30897E-08 |
| SNAI1      | 1.117272659 | 1.2928E-08  |
| ST3GAL1    | 1.113418533 | 3.957E-20   |
| IL18       | 1.113184796 | 0.001360705 |
| FAM71F1    | 1.112165083 | 0.023940535 |
| IRF2       | 1.111765306 | 1.1323E-05  |

|             |             |             |
|-------------|-------------|-------------|
| SHANK3      | 1.111391468 | 0.020587698 |
| ZNF295-AS1  | 1.111200375 | 0.001674513 |
| AL357054.4  | 1.108801718 | 0.030273334 |
| CFLAR       | 1.108386033 | 1.36475E-13 |
| SLC2A1      | 1.105832934 | 2.59402E-13 |
| ACOX1       | 1.105650398 | 1.09878E-22 |
| FOXP1       | 1.104516574 | 6.50281E-26 |
| DIRAS3      | 1.103689341 | 0.000111331 |
| IFI35       | 1.100247529 | 4.39573E-06 |
| NMI         | 1.094645179 | 1.94361E-06 |
| CCIN        | 1.09355351  | 1.82613E-12 |
| PPM1K       | 1.092885552 | 1.77007E-05 |
| RNF152      | 1.09202367  | 1.31421E-07 |
| CD3EAP      | 1.091181307 | 1.96149E-11 |
| AC010343.3  | 1.091073604 | 0.000126257 |
| RIMS2       | 1.090850771 | 0.023866814 |
| AC103702.2  | 1.090133106 | 0.002305293 |
| APCDD1L-DT  | 1.089502949 | 1.45271E-13 |
| AL162727.3  | 1.088770246 | 0.047177493 |
| CPN2        | 1.088596694 | 0.044235804 |
| ZFPM2       | 1.088100453 | 0.000260481 |
| NET1        | 1.08776958  | 9.36019E-14 |
| GMPR        | 1.087219531 | 0.002421226 |
| MT2P1       | 1.085252287 | 5.03433E-05 |
| MOB3C       | 1.083804196 | 9.94683E-07 |
| CPNE5       | 1.08312706  | 0.01089305  |
| BMPR1B      | 1.080709512 | 1.06514E-08 |
| HIVEP1      | 1.079141029 | 1.62121E-19 |
| SYNDIG1     | 1.079069968 | 3.90431E-08 |
| AC021205.1  | 1.076117782 | 7.23277E-05 |
| TMEM92      | 1.074820294 | 0.000637418 |
| MYD88       | 1.073645229 | 6.09255E-06 |
| B4GALT1     | 1.070382853 | 7.97615E-54 |
| MT1X        | 1.069982389 | 6.62139E-11 |
| LRRC4       | 1.069395496 | 0.030751704 |
| LINC00908   | 1.067250989 | 0.041216836 |
| CLEC2A      | 1.066093624 | 3.62716E-10 |
| CLEC2B      | 1.064731311 | 6.88901E-11 |
| XLOC_003077 | 1.06374649  | 0.023142538 |
| PARP9       | 1.06234772  | 0.000110619 |
| AC079298.3  | 1.061057671 | 2.25079E-06 |
| AC009549.1  | 1.060988979 | 0.016668123 |
| ZNF469      | 1.06061522  | 1.12508E-10 |



|            |             |             |
|------------|-------------|-------------|
| ZC3H12C    | 1.059845876 | 5.94199E-07 |
| TGM2       | 1.059281585 | 1.21497E-15 |
| CASP1      | 1.058715897 | 9.91451E-06 |
| SHB        | 1.056501231 | 4.45107E-08 |
| PLAT       | 1.056172302 | 3.38914E-10 |
| IRAK3      | 1.056005672 | 1.29212E-05 |
| RHBDL2     | 1.055210716 | 9.32199E-14 |
| AL031595.3 | 1.053669442 | 0.014572899 |
| AL390719.1 | 1.053221201 | 0.038874395 |
| BTN3A3     | 1.052402958 | 2.07193E-09 |
| LCP1       | 1.052390286 | 0.008695822 |
| DIO3OS     | 1.051968053 | 0.025798206 |
| ELOVL3     | 1.05165594  | 1.04514E-05 |
| FLT1       | 1.049000615 | 1.26763E-07 |
| SIRPAP1    | 1.048414355 | 0.02035033  |
| AL136295.5 | 1.047879258 | 0.042318966 |
| CCNJ       | 1.047081292 | 1.63227E-14 |
| HLA-J      | 1.047005472 | 0.041482577 |
| MARCKSL1   | 1.046306704 | 9.19226E-06 |
| SLC25A37   | 1.046140529 | 1.68546E-11 |
| A4GALT     | 1.044076437 | 1.82909E-07 |
| CDYL2      | 1.043562784 | 2.58474E-11 |
| ASPHD2     | 1.043082811 | 0.000242925 |
| NKX2-6     | 1.042641773 | 0.014087552 |
| DUSP5      | 1.042559519 | 5.70276E-07 |
| IFNGR2     | 1.042020397 | 9.90421E-11 |
| LINC01060  | 1.041892189 | 3.97444E-05 |
| HSPD1P4    | 1.041337929 | 0.010512708 |
| RUNX3      | 1.040815495 | 5.62611E-11 |
| AC034223.2 | 1.040795684 | 0.011179324 |
| PDZD2      | 1.040622037 | 0.001430301 |
| CGNL1      | 1.03886367  | 1.71952E-05 |
| PGM2L1     | 1.038023096 | 5.56272E-27 |
| AC093724.1 | 1.037856614 | 0.009720977 |
| SLFNL1-AS1 | 1.035830709 | 0.008692635 |
| FAM168A    | 1.034597869 | 3.56331E-21 |
| FRMD6      | 1.033901323 | 1.53175E-23 |
| ADAMTS9    | 1.032833269 | 0.001602297 |
| AL138724.1 | 1.032183147 | 0.000198132 |
| GEM        | 1.031662079 | 3.2548E-17  |
| HK2        | 1.031611616 | 4.07703E-17 |
| TET3       | 1.031395406 | 1.41582E-05 |
| C19orf66   | 1.030390061 | 1.94828E-05 |

|             |             |             |
|-------------|-------------|-------------|
| KLF10       | 1.029971692 | 3.39982E-18 |
| BCOR        | 1.029322567 | 4.68838E-13 |
| BEND5       | 1.028993354 | 0.003377912 |
| SERPINE1    | 1.028911325 | 3.86282E-14 |
| RAB20       | 1.028504432 | 0.00477087  |
| MSANTD3     | 1.027717101 | 7.32872E-19 |
| EDNRA       | 1.026521724 | 1.42679E-07 |
| TMEM140     | 1.024614511 | 0.001453377 |
| HOMER1      | 1.021292943 | 8.94545E-12 |
| LINC01561   | 1.021198043 | 0.039084399 |
| XLOC_004803 | 1.018007225 | 1.2055E-06  |
| SKIL        | 1.012321281 | 3.3361E-15  |
| IPO7P2      | 1.010702637 | 0.009473173 |
| PKNOX2      | 1.010584235 | 0.012571928 |
| SLC7A5      | 1.009861707 | 3.08546E-13 |
| C21orf91    | 1.003408207 | 2.40184E-09 |
| PHACTR4     | 1.003277174 | 1.16139E-08 |
| APOBEC3D    | 1.003272992 | 0.014489129 |
| LRRC49      | 1.00310989  | 1.80703E-12 |
| AC090197.1  | 1.000053348 | 2.88601E-05 |
| EVA1A       | 0.999045463 | 1.2802E-19  |
| AK3P3       | 0.998278149 | 0.033649704 |
| KCNN4       | 0.998021319 | 0.000105296 |
| CCDC144CP   | 0.997748285 | 0.017811721 |
| SPRY4       | 0.997740626 | 1.82745E-14 |
| GRB14       | 0.994569154 | 0.047032398 |
| RAI14       | 0.993591884 | 7.71818E-27 |
| TRAFD1      | 0.993063367 | 1.72538E-05 |
| DUSP3       | 0.989864735 | 2.4769E-25  |
| DCP1A       | 0.989280531 | 1.59112E-12 |
| CLEC2D      | 0.98860142  | 0.000140515 |
| FSTL3       | 0.986979818 | 3.18492E-06 |
| RTTN        | 0.986442411 | 2.23966E-19 |
| LINC01013   | 0.986162698 | 2.96081E-09 |
| ADAM19      | 0.986136534 | 3.32195E-24 |
| MSX1        | 0.984715946 | 4.72007E-08 |
| CDC42SE1    | 0.980898785 | 9.74777E-20 |
| KCNG1       | 0.980303631 | 3.38353E-07 |
| IL18R1      | 0.979797709 | 0.044814528 |
| PDCD1LG2    | 0.979612457 | 1.24413E-21 |
| LINC00519   | 0.979611695 | 0.000100892 |
| KLF9        | 0.978171842 | 8.14238E-10 |
| SLC11A2     | 0.976449559 | 3.24362E-15 |

|            |             |             |
|------------|-------------|-------------|
| ABLIM3     | 0.975055154 | 5.08679E-18 |
| NOTCH2     | 0.974729442 | 4.83639E-37 |
| MIRLET7A2  | 0.974462176 | 0.002045607 |
| AL358115.1 | 0.973543357 | 0.014713775 |
| CASP7      | 0.971160185 | 3.07573E-07 |
| HIPK2      | 0.968488048 | 2.10818E-23 |
| MLKL       | 0.967712522 | 1.53995E-05 |
| AUTS2      | 0.965441645 | 3.95999E-13 |
| RNF213     | 0.964762421 | 4.36215E-06 |
| AC112721.2 | 0.962647804 | 0.014694392 |
| AMZ1       | 0.961312248 | 9.00383E-14 |
| TPM1-AS    | 0.960509078 | 0.014087552 |
| AL355355.2 | 0.957865188 | 0.006501506 |
| PFKFB4     | 0.956186367 | 5.05941E-11 |
| MMP25-AS1  | 0.95410835  | 4.005E-06   |
| STK38L     | 0.954000382 | 1.45952E-11 |
| MTFP1      | 0.953505102 | 8.36708E-09 |
| ATP2B1     | 0.953338364 | 4.76163E-11 |
| ARID5A     | 0.952935775 | 1.97916E-08 |
| STAT4      | 0.952800736 | 3.40478E-05 |
| CYLD       | 0.951933609 | 2.4941E-13  |
| TICAM1     | 0.951230885 | 7.95228E-11 |
| CREB3L2    | 0.949315992 | 9.39224E-33 |
| DRAM1      | 0.947365759 | 2.27557E-09 |
| TMEM63B    | 0.946118861 | 3.45211E-09 |
| G17127     | 0.944458494 | 0.008505828 |
| MAFB       | 0.944446738 | 0.000485058 |
| AC060766.4 | 0.943223246 | 0.002883105 |
| NGFR       | 0.942262924 | 0.031635005 |
| CD40       | 0.941750896 | 8.32698E-08 |
| MORC3      | 0.940991635 | 1.04361E-25 |
| ZNF710     | 0.9409768   | 8.78066E-05 |
| C15orf39   | 0.940373817 | 2.46909E-08 |
| AC040162.1 | 0.937762055 | 0.012009722 |
| AL157394.1 | 0.937208778 | 0.00052635  |
| HLX        | 0.936847823 | 2.91372E-09 |
| RNF114     | 0.93566526  | 9.09558E-11 |
| NAB1       | 0.935545519 | 2.87744E-13 |
| HIST2H2BC  | 0.93553211  | 0.001838851 |
| ITPR3      | 0.932940865 | 7.08778E-10 |
| ARHGAP31   | 0.932687712 | 1.00654E-22 |
| IL1RL1     | 0.932263393 | 0.000380509 |
| C17orf49   | 0.931823208 | 0.017215831 |

|             |             |             |
|-------------|-------------|-------------|
| DENND5A     | 0.931283226 | 1.02665E-20 |
| TMEM41B     | 0.930314438 | 1.53346E-17 |
| IFIT5       | 0.928916542 | 3.88758E-07 |
| ZNF107      | 0.928317449 | 3.40676E-07 |
| BIRC2       | 0.926741028 | 8.33193E-19 |
| XLOC_006335 | 0.92597185  | 1.99275E-06 |
| XLOC_007116 | 0.925595735 | 4.89742E-05 |
| FOXP4       | 0.925002478 | 1.4163E-08  |
| AC105105.1  | 0.924733065 | 0.04645006  |
| PRSS35      | 0.923235284 | 0.031095647 |
| ENTPD7      | 0.920816921 | 4.60134E-16 |
| ETS1        | 0.920740054 | 7.62677E-13 |
| BMT2        | 0.920582603 | 5.64571E-16 |
| AC124798.1  | 0.919783521 | 0.002526697 |
| LINC00842   | 0.919387097 | 0.0019605   |
| FUT4        | 0.919032651 | 0.000107214 |
| SMURF1      | 0.918630073 | 1.13452E-20 |
| SPRY2       | 0.918463152 | 5.23894E-12 |
| C2orf27A    | 0.916315699 | 2.84131E-13 |
| XLOC_006303 | 0.915799908 | 3.14292E-06 |
| IL4R        | 0.915386115 | 2.61318E-17 |
| CTPS1       | 0.914511923 | 4.03437E-21 |
| PLAUR       | 0.913456885 | 2.89468E-24 |
| DNAJB5      | 0.912588267 | 5.78163E-14 |
| AC091806.1  | 0.911307477 | 0.006139756 |
| AC004816.2  | 0.909916031 | 0.000110741 |
| NRIP2       | 0.909660657 | 0.008282821 |
| B3GNT2      | 0.909457057 | 1.4806E-07  |
| TTC39B      | 0.907551068 | 8.98142E-09 |
| N4BP1       | 0.907405038 | 2.82739E-10 |
| AMIGO2      | 0.906592951 | 5.33838E-21 |
| AL645929.1  | 0.906253887 | 0.033811242 |
| TMEM132A    | 0.904988533 | 1.8835E-05  |
| XLOC_000523 | 0.90492542  | 0.013329223 |
| NFATC1      | 0.904543209 | 6.05565E-10 |
| AP000866.6  | 0.901851984 | 0.045989516 |
| HS3ST3A1    | 0.901623963 | 1.7446E-10  |
| AL139393.2  | 0.90150755  | 0.000259315 |
| TLNRD1      | 0.900651725 | 4.41172E-08 |
| RAPGEF2     | 0.900242168 | 6.97654E-12 |
| TRAF2       | 0.899919478 | 2.25811E-08 |
| ARHGEF40    | 0.898924345 | 3.42633E-15 |
| MIR1245A    | 0.897614587 | 4.57397E-05 |

|              |             |             |
|--------------|-------------|-------------|
| AC090607.2   | 0.895455649 | 0.02921111  |
| CALB2        | 0.895223362 | 0.000326945 |
| GASAL1       | 0.895105258 | 2.30972E-06 |
| GPR137C      | 0.895073902 | 0.035444045 |
| AC004832.4   | 0.89397091  | 0.036148472 |
| TRIM38       | 0.893733934 | 8.01555E-07 |
| NLRC5        | 0.892725824 | 1.86279E-05 |
| EGFR         | 0.892493531 | 1.14362E-15 |
| IKBKE        | 0.891286233 | 8.2443E-07  |
| PPP1R3B      | 0.890157329 | 2.71584E-20 |
| USP42        | 0.886259194 | 1.83165E-10 |
| WDFY2        | 0.885069203 | 2.63485E-16 |
| KCNT2        | 0.884891375 | 0.00773604  |
| FERMT1       | 0.884098706 | 0.004172749 |
| PELI1        | 0.883471355 | 6.91971E-09 |
| UAP1         | 0.882999995 | 1.41414E-21 |
| PNP          | 0.882863977 | 6.04895E-14 |
| G7242        | 0.881991565 | 0.008470709 |
| SH3PXD2A     | 0.881733043 | 2.04828E-28 |
| CRISPLD2     | 0.881543819 | 2.39438E-20 |
| BAZ1A        | 0.880495071 | 1.19299E-10 |
| ACSL5        | 0.879397792 | 0.001033395 |
| BHLHE41      | 0.879207407 | 4.07432E-07 |
| APBB2        | 0.879114238 | 8.85584E-22 |
| AC060766.5   | 0.878118623 | 0.044990507 |
| FRMD3        | 0.877805251 | 0.035405544 |
| MIR4482-1    | 0.875308191 | 0.018802766 |
| NPTX2        | 0.875266977 | 0.017010445 |
| ELK3         | 0.873792051 | 8.72637E-34 |
| AC093801.1   | 0.873488437 | 1.74788E-06 |
| BTN2A2       | 0.872946593 | 4.40866E-10 |
| GFRA2        | 0.872363306 | 0.019160835 |
| GPR3         | 0.872303384 | 0.016361088 |
| MAML2        | 0.869796626 | 4.40866E-10 |
| MOV10L1      | 0.868250914 | 0.012812545 |
| MAP3K5       | 0.868142793 | 0.000144062 |
| PTPRJ        | 0.867983466 | 2.53019E-05 |
| VEGFC        | 0.867127136 | 5.11607E-13 |
| TPST1        | 0.866341153 | 4.34845E-17 |
| TNS1         | 0.865523729 | 2.63734E-12 |
| PREX1        | 0.864625372 | 0.000633526 |
| ADAMTSL4-AS1 | 0.864512437 | 0.036198033 |
| PARP8        | 0.863736469 | 1.62838E-11 |

|              |             |             |
|--------------|-------------|-------------|
| LHFPL2       | 0.863328739 | 2.52085E-13 |
| TSHZ3        | 0.862206773 | 8.51086E-13 |
| ADTRP        | 0.861873181 | 5.89243E-07 |
| SYT15        | 0.860518266 | 0.000442569 |
| LRCH1        | 0.860274399 | 3.48523E-11 |
| UBASH3B      | 0.860064857 | 1.64557E-14 |
| ACSL4        | 0.860012423 | 3.85795E-21 |
| SIRPA        | 0.859923118 | 1.51609E-25 |
| BNC1         | 0.859259838 | 0.009812504 |
| MICB         | 0.858418799 | 1.21111E-07 |
| SLFN13       | 0.857571404 | 0.000355929 |
| NCR3LG1      | 0.857443719 | 0.004675098 |
| G14979       | 0.857273017 | 0.022453362 |
| CDK6         | 0.857139843 | 9.13856E-13 |
| SAMD4A       | 0.857082351 | 2.38895E-15 |
| GTPBP1       | 0.857028078 | 1.55702E-06 |
| CXCL16       | 0.856393679 | 6.58383E-05 |
| SPATA13      | 0.854020952 | 9.32597E-05 |
| PPP3CC       | 0.85331742  | 1.98132E-06 |
| AL157871.3   | 0.852415501 | 0.000565522 |
| ANKRD44      | 0.852123881 | 5.26829E-12 |
| RUNX1        | 0.851369244 | 1.79955E-14 |
| E2F7         | 0.850737136 | 8.76244E-09 |
| CDKL5        | 0.849226344 | 0.000495859 |
| PODXL        | 0.848481296 | 4.38508E-07 |
| TCAF2        | 0.847768048 | 2.71053E-05 |
| SALL1        | 0.847464291 | 0.00021465  |
| KRT16        | 0.84702008  | 0.017765807 |
| AC108010.1   | 0.846599891 | 0.009209543 |
| RPSAP52      | 0.846396907 | 6.46431E-11 |
| HECW2        | 0.846233081 | 2.27034E-05 |
| PALM2        | 0.845163262 | 0.000224486 |
| PCNX1        | 0.845120564 | 1.39967E-21 |
| BMPR2        | 0.843900633 | 1.04031E-18 |
| PLEKHA4      | 0.842002069 | 0.000154491 |
| TBC1D1       | 0.840759246 | 6.8044E-11  |
| ARNTL        | 0.837898506 | 3.4459E-23  |
| LINC01592    | 0.837840304 | 2.24271E-05 |
| PRKCZ        | 0.837790401 | 0.000881683 |
| MSC-AS1      | 0.83771117  | 2.93801E-23 |
| DLX5         | 0.837705346 | 0.029156563 |
| EIF2AK2      | 0.837608583 | 8.86477E-08 |
| RP11-640M9.1 | 0.837286139 | 0.000198132 |

|             |             |             |
|-------------|-------------|-------------|
| TRIM26      | 0.835914038 | 4.59892E-06 |
| TMEFF1      | 0.83546501  | 0.041196031 |
| POPDC2      | 0.834828367 | 0.000615759 |
| WTAP        | 0.834686901 | 1.77528E-11 |
| WARS        | 0.834340538 | 1.28339E-06 |
| ITPRIPL2    | 0.832785438 | 2.57554E-10 |
| GSAP        | 0.831185358 | 0.002526683 |
| SH2B3       | 0.830939194 | 3.43049E-13 |
| IRS2        | 0.830673089 | 1.27497E-09 |
| BTN3A1      | 0.830344647 | 8.23421E-05 |
| ADCY4       | 0.829579836 | 6.58383E-05 |
| COL24A1     | 0.829345195 | 3.22614E-06 |
| RORA        | 0.829285047 | 5.82116E-12 |
| AL121603.2  | 0.829285012 | 0.028491043 |
| LINC01137   | 0.828514555 | 4.30275E-10 |
| CBR3        | 0.827281352 | 2.86085E-07 |
| SMURF2      | 0.826898287 | 2.79245E-31 |
| RNF31       | 0.82674881  | 9.54718E-05 |
| B4GALT5     | 0.825872424 | 1.6479E-12  |
| XLOC_013420 | 0.825257002 | 0.010709564 |
| SSBP3       | 0.82462253  | 1.2397E-16  |
| TNFAIP8L3   | 0.823916889 | 0.014754481 |
| SOX11       | 0.82238261  | 0.000149162 |
| LINC01426   | 0.822371653 | 2.05598E-05 |
| FAS         | 0.821783471 | 5.58135E-13 |
| GAS7        | 0.820594306 | 7.67698E-09 |
| ZBED6       | 0.820115639 | 0.024395647 |
| ABL1        | 0.818884674 | 4.01877E-10 |
| AC245297.2  | 0.81834337  | 0.011958909 |
| SHROOM4     | 0.817657799 | 0.000184312 |
| AC004987.2  | 0.816671883 | 0.007517006 |
| TMEM106A    | 0.816354705 | 1.50985E-06 |
| IL21R       | 0.81495282  | 0.037150537 |
| TSPAN13     | 0.814673072 | 6.52995E-10 |
| SRRM3       | 0.813809125 | 0.000154796 |
| ARL5B       | 0.813714337 | 3.41828E-07 |
| ROS1        | 0.813160218 | 0.015188123 |
| ADAMTS6     | 0.812596427 | 7.17372E-15 |
| EHD1        | 0.812297217 | 1.00744E-06 |
| RNF126      | 0.811982139 | 2.78734E-09 |
| VEGFA       | 0.811863857 | 2.74136E-09 |
| ANKLE2      | 0.811359174 | 3.15373E-19 |
| TBC1D10A    | 0.810564562 | 2.85259E-09 |

|            |             |             |
|------------|-------------|-------------|
| DNAJA1     | 0.810451443 | 8.35062E-12 |
| MASTL      | 0.810325192 | 3.54354E-05 |
| SLC22A23   | 0.808320046 | 3.58365E-08 |
| CYP51A1P2  | 0.806832219 | 0.049462435 |
| TBC1D2B    | 0.805623303 | 3.70452E-11 |
| AC108463.3 | 0.805454955 | 0.039472924 |
| SLC35G1    | 0.804887171 | 3.79119E-10 |
| PLAU       | 0.802102784 | 7.12678E-05 |
| MDGA1      | 0.801769309 | 0.000268795 |
| RGS20      | 0.80137851  | 2.34613E-05 |
| NUDCD1     | 0.799840839 | 2.30406E-12 |
| OTUD4      | 0.798704277 | 3.17082E-09 |
| APCDD1L    | 0.796594118 | 5.60865E-09 |
| RARRES1    | 0.796333517 | 0.044784535 |
| ZNF470     | 0.796035705 | 4.88468E-10 |
| SERPINB8   | 0.795467338 | 1.16223E-23 |
| ADPRHL2    | 0.793152815 | 3.73954E-10 |
| UBE2L6     | 0.79242529  | 0.000192916 |
| UCK2       | 0.792227089 | 3.71728E-19 |
| TMEM171    | 0.791409721 | 0.020639194 |
| LRP4       | 0.790775137 | 0.001339769 |
| KSR1       | 0.788280201 | 6.88099E-06 |
| PLXNA4     | 0.788230314 | 0.003141401 |
| RASGRP1    | 0.788217941 | 0.005460082 |
| GALNT16    | 0.787337323 | 0.002062104 |
| CLMAT3     | 0.786284359 | 7.35174E-06 |
| TP53BP2    | 0.785803992 | 6.90439E-10 |
| ZNF670     | 0.785400853 | 5.4184E-07  |
| SERTAD1    | 0.784338976 | 8.0406E-13  |
| PVR        | 0.783686736 | 1.79251E-16 |
| INSIG1     | 0.78332929  | 3.0746E-06  |
| AC068491.4 | 0.783239331 | 0.000248312 |
| TNFRSF10B  | 0.783136158 | 2.63764E-10 |
| EHD4       | 0.782406086 | 1.37217E-06 |
| S1PR2      | 0.78117158  | 1.78371E-09 |
| AC060766.7 | 0.780332098 | 0.00188583  |
| ETV6       | 0.778343482 | 7.3307E-27  |
| RGPD5      | 0.778333015 | 0.001716529 |
| LINC00624  | 0.775342417 | 0.004626942 |
| PIK3R3     | 0.774139965 | 0.025991653 |
| GPR180     | 0.773098988 | 3.54274E-11 |
| APAF1      | 0.772127441 | 6.66611E-09 |
| CEP350     | 0.771733082 | 1.16139E-08 |



|             |             |             |
|-------------|-------------|-------------|
| CASP10      | 0.770574081 | 0.000664506 |
| ANO7L1      | 0.770270609 | 0.002212371 |
| NCK2        | 0.768652724 | 1.3849E-11  |
| CARD16      | 0.768001197 | 0.000325375 |
| GALNT3      | 0.765536837 | 0.00280799  |
| EMP2        | 0.764399169 | 1.28151E-08 |
| NRG1        | 0.763684388 | 3.67641E-20 |
| AC002056.1  | 0.762113255 | 0.020827916 |
| SH3PXD2B    | 0.76199619  | 2.17813E-11 |
| CEP170P1    | 0.761953132 | 2.29082E-07 |
| CYTH1       | 0.761890878 | 1.56743E-08 |
| TIPARP      | 0.761528015 | 2.19264E-12 |
| CEP170      | 0.761000928 | 1.42892E-23 |
| CEMIP2      | 0.759997657 | 1.19641E-19 |
| MAP2        | 0.756760052 | 0.000176697 |
| KLF7        | 0.756645461 | 9.48441E-19 |
| SP100       | 0.754087652 | 2.54926E-09 |
| RBM24       | 0.753526706 | 1.03296E-05 |
| RCAN1       | 0.752649179 | 1.16378E-05 |
| SLFN11      | 0.752371476 | 4.90456E-09 |
| NRP2        | 0.75067964  | 1.2988E-08  |
| SPECC1      | 0.750587363 | 2.34586E-21 |
| SDC1        | 0.750229211 | 3.75741E-09 |
| CDH2        | 0.747994378 | 5.75248E-23 |
| GSTO2       | 0.747037617 | 2.02057E-06 |
| ZNF597      | 0.746614787 | 0.00019399  |
| TRIM22      | 0.74633393  | 2.12951E-06 |
| CYTOR       | 0.74473144  | 4.01449E-16 |
| CXorf38     | 0.744707044 | 2.5398E-08  |
| C17orf67    | 0.744320745 | 0.00330035  |
| NUS1P1      | 0.744078147 | 0.012911656 |
| BTG3        | 0.742530662 | 4.16191E-11 |
| TRIM5       | 0.742448402 | 5.68768E-05 |
| AC008147.2  | 0.742299891 | 0.045987156 |
| RAP2C       | 0.742000341 | 1.17265E-09 |
| XLOC_004362 | 0.73929487  | 0.001780732 |
| SPEN        | 0.73861683  | 7.37485E-11 |
| HHIP        | 0.738545988 | 0.000913568 |
| CCDC93      | 0.738376784 | 4.00949E-26 |
| RCL1        | 0.73816465  | 6.30519E-16 |
| ELL         | 0.738092821 | 3.06477E-07 |
| NAV3        | 0.737998008 | 4.0808E-18  |
| PNRC2P1     | 0.737965027 | 0.038365928 |

|            |             |             |
|------------|-------------|-------------|
| SAMD11     | 0.737833898 | 0.004016247 |
| XRN1       | 0.736924737 | 4.3651E-07  |
| TLE3       | 0.735929079 | 1.20011E-07 |
| STX1B      | 0.735767652 | 0.033253322 |
| HIF1A      | 0.735657445 | 3.27168E-18 |
| GABARAPL1  | 0.735609098 | 1.6431E-12  |
| DGKH       | 0.735575215 | 5.10047E-07 |
| TIAM2      | 0.734828246 | 1.32609E-11 |
| AC021205.3 | 0.734461353 | 0.020683078 |
| ADGRD1     | 0.73302062  | 6.53903E-07 |
| BLZF1      | 0.732968979 | 1.48531E-09 |
| HELB       | 0.732625759 | 0.002101641 |
| MT1E       | 0.729067501 | 1.0444E-07  |
| ABL2       | 0.728921274 | 4.36941E-18 |
| PRKD2      | 0.727877692 | 0.000513017 |
| AL356417.2 | 0.727818614 | 6.40817E-05 |
| ZBTB21     | 0.727313053 | 1.61099E-14 |
| TAPBP      | 0.727261757 | 1.09333E-06 |
| NBN        | 0.727134292 | 2.83415E-11 |
| SDC4       | 0.726768679 | 3.41828E-07 |
| PTGIR      | 0.725431905 | 1.4237E-05  |
| CACNA1A    | 0.725380081 | 0.002352183 |
| LIMD2      | 0.723761146 | 2.96075E-05 |
| G6708      | 0.723395523 | 4.78916E-05 |
| ANKFY1     | 0.722057594 | 6.22461E-08 |
| TMEM100    | 0.721076496 | 0.045955859 |
| UNC5B      | 0.720714547 | 1.32911E-08 |
| LACTB      | 0.720328201 | 3.83815E-11 |
| PHLDB1     | 0.720276293 | 2.10608E-06 |
| TRIP10     | 0.719498006 | 1.12537E-08 |
| GPD2       | 0.719381394 | 2.1205E-07  |
| PDLIM4     | 0.719303579 | 4.09009E-11 |
| PAX8       | 0.717443897 | 0.000584844 |
| AC243964.3 | 0.717065507 | 3.59327E-05 |
| PIM3       | 0.71565267  | 0.000671172 |
| TBC1D16    | 0.712505035 | 4.14274E-10 |
| MMP3       | 0.710554246 | 1.21472E-06 |
| AMOTL1     | 0.71043221  | 3.58782E-20 |
| TLE4       | 0.709049013 | 2.87358E-10 |
| RBMS1P1    | 0.708352128 | 0.011336586 |
| MAP3K8     | 0.708213857 | 0.000398156 |
| TENT4A     | 0.706122623 | 1.33281E-08 |
| JMJD6      | 0.705949542 | 3.0244E-28  |

|            |             |             |
|------------|-------------|-------------|
| DTX4       | 0.705579441 | 0.002030486 |
| UXS1       | 0.705161929 | 2.9734E-10  |
| ARHGAP42   | 0.704649974 | 0.000408299 |
| RNU2-59P   | 0.70418575  | 0.006981274 |
| CHST2      | 0.703774222 | 0.004240005 |
| XIAP       | 0.701687676 | 2.8163E-16  |
| CD44       | 0.701078401 | 2.37591E-13 |
| TRIM47     | 0.700307009 | 0.008641295 |
| ETV3       | 0.698486597 | 8.44568E-07 |
| PLA2G4A    | 0.697778179 | 0.000865768 |
| AC005229.1 | 0.696045059 | 0.000104612 |
| MCL1       | 0.695728861 | 6.31149E-11 |
| ERRFI1     | 0.694102089 | 1.72538E-05 |
| CSRNP2     | 0.693884167 | 3.62841E-08 |
| HLA-L      | 0.693271098 | 2.91495E-06 |
| FIBCD1     | 0.689302444 | 0.000208983 |
| PIM1       | 0.688942709 | 0.000418263 |
| CFH        | 0.688338397 | 9.20959E-05 |
| LRRC15     | 0.686994678 | 2.9262E-07  |
| GLIPR2     | 0.685936049 | 1.07637E-14 |
| STIL       | 0.685877262 | 1.54783E-10 |
| 1-Dec      | 0.685517801 | 0.034830714 |
| SYTL4      | 0.685340065 | 0.003948068 |
| OSGIN2     | 0.684976951 | 2.48022E-06 |
| MICAL3     | 0.684385836 | 2.66873E-05 |
| GTF2B      | 0.684227817 | 3.36911E-08 |
| ATP10A     | 0.683677954 | 5.77267E-15 |
| ATP2B1-AS1 | 0.683434038 | 0.008492438 |
| WWC3       | 0.682872603 | 9.70459E-15 |
| FAM83G     | 0.682093486 | 0.000462123 |
| SGK1       | 0.680917768 | 1.45848E-11 |
| ZBTB11-AS1 | 0.68070167  | 0.002655419 |
| SEMA7A     | 0.679324928 | 3.30303E-08 |
| PSD4       | 0.679112135 | 0.005790968 |
| PSMB10     | 0.679088514 | 4.4431E-05  |
| CD58       | 0.67889121  | 6.53937E-12 |
| TRANK1     | 0.676104606 | 0.002110212 |
| PRKCD      | 0.676088728 | 2.15887E-07 |
| MAP1S      | 0.676071995 | 0.000405958 |
| MEF2A      | 0.675198045 | 8.14919E-20 |
| FILIP1L    | 0.675022185 | 1.60274E-18 |
| IFITM1     | 0.674371906 | 0.000275924 |
| TRPM3      | 0.673480964 | 0.004646126 |

|            |             |             |
|------------|-------------|-------------|
| RELA       | 0.673178186 | 2.49461E-06 |
| AC112220.2 | 0.673010748 | 1.54091E-07 |
| AP000525.9 | 0.672692226 | 0.000164318 |
| SLC7A7     | 0.672172231 | 9.97562E-05 |
| MYOSLID    | 0.671979846 | 2.01075E-06 |
| CCDC150    | 0.671399265 | 0.008354064 |
| CHIC2      | 0.670866634 | 2.20895E-16 |
| TENM4      | 0.669662537 | 1.10832E-06 |
| IFNWP19    | 0.669399601 | 3.28985E-05 |
| EPB41L4A   | 0.668046888 | 0.009999524 |
| NUP58      | 0.667582214 | 5.53141E-19 |
| HILPDA     | 0.667524844 | 5.83014E-13 |
| NHS        | 0.666944836 | 0.004193735 |
| NUP62      | 0.666518046 | 1.10854E-06 |
| DOT1L      | 0.663568485 | 1.26109E-05 |
| PCGF5      | 0.663541183 | 3.94863E-06 |
| ANKRD1     | 0.663047805 | 0.001536647 |
| CTDP1      | 0.662598828 | 0.00256266  |
| BAHCC1     | 0.662438154 | 1.1961E-05  |
| SPP1       | 0.662390516 | 3.90139E-05 |
| ADAMTS14   | 0.661354731 | 0.033778872 |
| BCL10      | 0.659416236 | 1.41414E-21 |
| WSB1       | 0.657249384 | 1.78813E-19 |
| MEX3B      | 0.656005275 | 0.000800786 |
| SERTAD2    | 0.654313614 | 4.21069E-11 |
| SP140L     | 0.653594652 | 7.98114E-10 |
| DNAJB9     | 0.653172465 | 7.32872E-19 |
| UHRF1BP1   | 0.651538376 | 0.000185944 |
| BCL7A      | 0.651151856 | 2.18089E-05 |
| BPGM       | 0.650980854 | 9.47569E-16 |
| PSMB8      | 0.650430597 | 0.000156834 |
| FAM110A    | 0.650414187 | 0.045632352 |
| SLC35F2    | 0.650288715 | 6.02212E-09 |
| SEC24A     | 0.650275864 | 1.30324E-10 |
| FAM210A    | 0.649649295 | 9.69675E-11 |
| KLHL21     | 0.649476365 | 3.19856E-08 |
| PPP1R13L   | 0.648247967 | 9.26693E-07 |
| OGFRL1     | 0.64802255  | 1.31846E-05 |
| LDLRAD3    | 0.646931336 | 2.42953E-09 |
| NUB1       | 0.645498165 | 5.51977E-07 |
| FAM208B    | 0.645205528 | 2.08046E-16 |
| LIMS1      | 0.644314121 | 6.66118E-21 |
| FAM155A    | 0.644137263 | 0.012359759 |

|              |             |             |
|--------------|-------------|-------------|
| BAK1         | 0.643243979 | 3.57655E-05 |
| LUZP1        | 0.643186753 | 1.24631E-21 |
| PLPP4        | 0.643161873 | 2.00025E-08 |
| AC080013.4   | 0.643058088 | 0.033461519 |
| HASPIN       | 0.642876542 | 0.004037559 |
| PPAN         | 0.641058092 | 0.034140821 |
| STBD1        | 0.639565011 | 4.78128E-08 |
| PDE4D        | 0.63950758  | 0.005758342 |
| ABCC6        | 0.638903827 | 0.007956343 |
| SGPL1        | 0.63821017  | 2.77476E-16 |
| TBX2         | 0.638035334 | 0.014432243 |
| ZNF618       | 0.636353621 | 0.000484833 |
| SLC30A7      | 0.636111454 | 3.74045E-11 |
| ARSI         | 0.635915608 | 0.00095054  |
| NNMT         | 0.635394525 | 9.28222E-11 |
| FUT11        | 0.633917508 | 7.07304E-15 |
| TBC1D9       | 0.633411993 | 4.78255E-07 |
| GADD45B      | 0.632481953 | 8.91832E-09 |
| MPP3         | 0.632104414 | 0.000634862 |
| WDR66        | 0.631493192 | 0.001986539 |
| SPTLC2       | 0.63143925  | 7.68887E-32 |
| DUSP6        | 0.630898149 | 4.43348E-06 |
| TNFAIP1      | 0.630604891 | 3.11213E-08 |
| JAK3         | 0.629203344 | 0.000237776 |
| MLXIP        | 0.628952482 | 7.4559E-11  |
| ROBO1        | 0.62859838  | 6.48678E-10 |
| ARHGAP22     | 0.628218917 | 3.64115E-07 |
| USP31        | 0.628044763 | 5.30389E-06 |
| RP6-206I17.1 | 0.627287434 | 1.39519E-05 |
| PSMD6-AS2    | 0.626990194 | 0.029231487 |
| ZNF697       | 0.626932297 | 0.00019236  |
| SLFN12       | 0.626699368 | 3.41828E-07 |
| HIST2H2AA3   | 0.626377057 | 0.021742204 |
| PUS7         | 0.62634421  | 7.19867E-13 |
| DENND2C      | 0.626271377 | 4.02061E-05 |
| KDM6A        | 0.625788998 | 9.94683E-07 |
| BICDL2       | 0.625262083 | 0.044385585 |
| FMR1         | 0.624901428 | 1.07568E-06 |
| SELENOI      | 0.624851893 | 6.47805E-09 |
| DOCK9        | 0.624426699 | 8.44136E-06 |
| PIGA         | 0.623638194 | 5.9381E-11  |
| CNP          | 0.623564076 | 2.68997E-05 |
| STARD13-AS   | 0.623432928 | 0.001453888 |

|             |             |             |
|-------------|-------------|-------------|
| NOD1        | 0.622431764 | 0.004902418 |
| MOV10       | 0.621651226 | 3.34308E-05 |
| VHL         | 0.62079477  | 4.75618E-07 |
| CLCF1       | 0.620659464 | 2.27821E-07 |
| LINC01705   | 0.620503217 | 0.004337897 |
| KBTBD2      | 0.620479145 | 8.32257E-18 |
| JCAD        | 0.619416731 | 6.67101E-14 |
| APLF        | 0.619136081 | 2.20842E-05 |
| PABPC4L     | 0.618606814 | 0.011222348 |
| SERPINB9    | 0.61858739  | 0.010651741 |
| ODF2L       | 0.618270059 | 1.56983E-08 |
| IRF9        | 0.617675425 | 0.014486126 |
| G33445      | 0.615919792 | 0.001558171 |
| MICAL2      | 0.615848396 | 1.53457E-13 |
| MICALL2     | 0.614571491 | 0.000168762 |
| NOTCH2NLA   | 0.614440187 | 8.27141E-14 |
| ADAMTS9-AS2 | 0.613681722 | 0.001152329 |
| TMEM189     | 0.613460391 | 3.57149E-09 |
| EPHB1       | 0.613245474 | 0.008492288 |
| SPAG1       | 0.612980884 | 0.019597545 |
| JADE3       | 0.611505263 | 5.72544E-06 |
| RNF149      | 0.610585066 | 2.1572E-05  |
| APOBEC3F    | 0.610564314 | 0.002535223 |
| ADO         | 0.609497634 | 9.56676E-10 |
| PHF11       | 0.609380428 | 1.03122E-06 |
| CPEB4       | 0.60906477  | 3.46284E-08 |
| BTN2A1      | 0.60895264  | 6.15058E-11 |
| WISP1       | 0.608695216 | 1.13644E-06 |
| GNPNAT1     | 0.607779229 | 2.86018E-22 |
| BAZ2A       | 0.607700512 | 2.31166E-06 |
| SOX4        | 0.607464011 | 1.26572E-05 |
| SMG6        | 0.606213714 | 2.00638E-07 |
| BLOC1S3     | 0.605368305 | 5.96655E-11 |
| STARD13     | 0.604732457 | 2.39694E-09 |
| FGF5        | 0.604434837 | 1.90137E-08 |
| P2RY11      | 0.603781467 | 0.039333034 |
| CHST3       | 0.602801524 | 1.97351E-09 |
| ULK1        | 0.602332177 | 2.32307E-05 |
| MFHAS1      | 0.601670754 | 0.000121654 |
| YWHAG       | 0.601168759 | 3.00203E-15 |
| NANOS3      | 0.600986944 | 0.000461202 |
| SDK2        | 0.600603112 | 1.99014E-05 |
| BID         | 0.600256466 | 7.43653E-08 |

|              |              |             |
|--------------|--------------|-------------|
| SENP8        | -0.600063622 | 0.000148404 |
| AC008946.1   | -0.600417468 | 0.027551936 |
| AL135925.1   | -0.600515083 | 9.7793E-05  |
| BLOC1S1-RDH5 | -0.60065305  | 0.017701818 |
| SHOX2        | -0.600793617 | 5.32186E-06 |
| ZNF503       | -0.600841183 | 9.88132E-05 |
| AC005736.1   | -0.601986887 | 7.74073E-06 |
| NHLRC1       | -0.602037541 | 0.00015502  |
| OXLD1        | -0.602061362 | 2.84352E-07 |
| ACBD4        | -0.602998009 | 0.000230403 |
| SRP14-AS1    | -0.604311831 | 0.000778865 |
| AKR1C3       | -0.604756508 | 5.48748E-07 |
| LINC00475    | -0.605401038 | 0.006710551 |
| DDX47        | -0.605504393 | 0.000315922 |
| AC133552.5   | -0.605860445 | 0.007176541 |
| ZFP36        | -0.606150467 | 1.92738E-05 |
| COQ8B        | -0.606768872 | 4.93978E-06 |
| PLEKHF1      | -0.607772324 | 0.010752677 |
| OTUD1        | -0.607806271 | 0.02035821  |
| SMAD3        | -0.607918319 | 2.22944E-08 |
| ARHGAP18     | -0.608081241 | 7.22073E-14 |
| ZNF248       | -0.608648932 | 6.80574E-06 |
| C20orf96     | -0.608711298 | 1.00846E-06 |
| VSIR         | -0.608943901 | 8.28937E-05 |
| FAM24B       | -0.609352473 | 0.000203424 |
| ARHGAP20     | -0.609494903 | 0.045990751 |
| ARMC7        | -0.609593369 | 5.03125E-05 |
| TMEM53       | -0.610371938 | 3.36891E-08 |
| DKK2         | -0.610400594 | 0.000253053 |
| KBTBD7       | -0.610526811 | 1.00246E-06 |
| AL031320.2   | -0.610699873 | 0.012571001 |
| AL450998.1   | -0.610782164 | 0.003818433 |
| LIN7A        | -0.610863324 | 0.000165063 |
| FANCE        | -0.610912218 | 0.012834499 |
| MINCR        | -0.611555093 | 3.67359E-06 |
| TGFBR3L      | -0.614262108 | 0.000724537 |
| ZFP36L2      | -0.61482527  | 1.49326E-06 |
| ABHD11-AS1   | -0.615078412 | 0.036264602 |
| ARMCX7P      | -0.615622494 | 0.014450069 |
| GALM         | -0.615832179 | 9.04457E-13 |
| AC134043.2   | -0.616195681 | 4.90421E-05 |
| FAM133CP     | -0.616583581 | 0.040538887 |
| THRB-IT1     | -0.617096539 | 0.047192568 |

|             |              |             |
|-------------|--------------|-------------|
| INTS6-AS1   | -0.617764906 | 0.007517006 |
| HSPB3       | -0.618032856 | 2.01619E-09 |
| KCCAT198    | -0.618150277 | 0.000218704 |
| CCDC9B      | -0.618503513 | 2.38178E-08 |
| TLL7        | -0.618771717 | 0.000197259 |
| CASC2       | -0.619810519 | 0.008716171 |
| THAP11      | -0.619811265 | 3.75531E-07 |
| ORAI3       | -0.620742182 | 2.68707E-05 |
| LDB2        | -0.621271432 | 4.18935E-08 |
| DOCK11      | -0.621758572 | 5.57378E-05 |
| AC016065.1  | -0.622334675 | 4.31156E-05 |
| BAIAP2-DT   | -0.623342527 | 6.88249E-05 |
| ZNF90       | -0.623629259 | 0.012028907 |
| NUDT7       | -0.623741379 | 0.001113774 |
| C1orf134    | -0.624327901 | 0.00347433  |
| TNS2        | -0.624506576 | 4.47659E-05 |
| TXNRD3      | -0.624759102 | 0.002724402 |
| PRR16       | -0.624973507 | 4.95663E-06 |
| BDNF-AS     | -0.625155176 | 0.007026491 |
| GLYATL2     | -0.625512235 | 0.005330971 |
| PXMP2       | -0.625755809 | 0.001562558 |
| ZSCAN16     | -0.625875263 | 0.000339947 |
| FAM86EP     | -0.626633251 | 0.022197526 |
| GNAI1       | -0.626639696 | 1.03E-09    |
| CEMIP       | -0.627969794 | 1.03213E-06 |
| EVA1C       | -0.627982027 | 0.00178064  |
| TSHZ1       | -0.628009548 | 0.000169834 |
| CUEDC1      | -0.628301008 | 0.000199713 |
| AL096870.2  | -0.628314542 | 0.025551301 |
| CCDC125     | -0.629295588 | 1.79177E-05 |
| SNPH        | -0.629386054 | 0.00470412  |
| NDUFA7      | -0.629926529 | 0.038984221 |
| CUTALP      | -0.631441521 | 5.45556E-10 |
| RHOBTB3     | -0.631557127 | 3.79579E-13 |
| CTDSPL      | -0.631675746 | 1.07466E-12 |
| GS1-124K5.4 | -0.631724113 | 6.93749E-06 |
| AC090515.2  | -0.631729685 | 0.009295907 |
| CEBPD       | -0.631985094 | 2.29823E-05 |
| ZNF630      | -0.63257285  | 0.000619221 |
| ZNF563      | -0.633071359 | 0.000295925 |
| AC016582.3  | -0.634556263 | 0.043657992 |
| PRIM1       | -0.634906822 | 1.67375E-05 |
| PGPEP1      | -0.63503803  | 2.12654E-11 |



|            |              |             |
|------------|--------------|-------------|
| ELOVL4     | -0.635610048 | 7.83102E-07 |
| RANGRF     | -0.636219563 | 0.000901416 |
| SNORA84    | -0.636435668 | 0.012501921 |
| AL928921.2 | -0.636981353 | 0.027138018 |
| CC2D1A     | -0.637374047 | 1.74881E-06 |
| TSEN54     | -0.637654714 | 7.86278E-07 |
| TMEM177    | -0.638159396 | 6.23567E-09 |
| ST6GALNAC5 | -0.63906809  | 2.37347E-05 |
| SSX2IP     | -0.639424268 | 0.002389129 |
| CRIP1      | -0.640260186 | 0.005966604 |
| LRRC43     | -0.640516924 | 0.034103313 |
| TRIM6      | -0.642517807 | 0.007546992 |
| PLEKHH3    | -0.643173477 | 0.000264099 |
| CAPS2      | -0.643666017 | 0.0148964   |
| PER3       | -0.644213842 | 2.01601E-07 |
| ZNF793-AS1 | -0.644471526 | 0.027165317 |
| ATP6V1E2   | -0.645606345 | 0.005917797 |
| EHBP1      | -0.646883959 | 3.71385E-15 |
| FAM27A     | -0.647345791 | 0.014765801 |
| AC026979.2 | -0.647552082 | 0.003290398 |
| RSRP1      | -0.648296802 | 1.60727E-14 |
| FAM117B    | -0.648497331 | 0.026732791 |
| AC138207.8 | -0.648844985 | 1.13352E-05 |
| NEIL1      | -0.649097012 | 0.002651113 |
| LRRC1      | -0.649941568 | 0.042579925 |
| NTHL1      | -0.649971634 | 1.43665E-13 |
| PEX11A     | -0.650049683 | 7.06158E-10 |
| JRK        | -0.650085019 | 5.31578E-07 |
| SERAC1     | -0.650323857 | 1.75794E-06 |
| INMT       | -0.651178979 | 9.55866E-05 |
| TOLLIP-AS1 | -0.652310501 | 0.002291203 |
| RTL10      | -0.653047951 | 8.85617E-08 |
| OSGEPL1    | -0.654417639 | 3.67275E-06 |
| TRAM1L1    | -0.655129607 | 0.0006686   |
| FRMPD4     | -0.655333022 | 0.033705333 |
| GAD1       | -0.655598362 | 0.014453019 |
| CSKMT      | -0.656679494 | 6.37729E-10 |
| AC244153.1 | -0.657820668 | 1.47131E-10 |
| EID2B      | -0.65833884  | 0.01176338  |
| MYLK-AS1   | -0.658466218 | 0.03839149  |
| BTBD3      | -0.658486338 | 1.75883E-07 |
| HCP5       | -0.658601246 | 0.042579925 |
| AL031599.1 | -0.659691766 | 0.003472186 |

|            |              |             |
|------------|--------------|-------------|
| AL137782.1 | -0.659972037 | 0.034196696 |
| AL021707.2 | -0.660169035 | 0.01943463  |
| AC068338.2 | -0.660357673 | 0.04516727  |
| PHLPP1     | -0.660882117 | 0.00260229  |
| NDRG4      | -0.660908199 | 0.001685393 |
| AC132192.2 | -0.661248214 | 0.047177493 |
| CASTOR3    | -0.661427629 | 0.00681856  |
| MAP3K1     | -0.661804749 | 9.83797E-06 |
| AP002360.1 | -0.662083326 | 0.000314286 |
| RDH5       | -0.663325    | 0.000151005 |
| LCA5       | -0.664967183 | 1.56566E-06 |
| NR2F2-AS1  | -0.665234281 | 0.007146212 |
| EHHADH     | -0.665360434 | 8.50296E-08 |
| IRF6       | -0.666053993 | 0.025660733 |
| AL158206.1 | -0.666325821 | 0.00285224  |
| ZNF517     | -0.66784925  | 0.007413248 |
| TCEA3      | -0.668535144 | 1.03122E-06 |
| CEP126     | -0.668955113 | 6.51356E-07 |
| AC138409.2 | -0.669052559 | 0.023487292 |
| LGR4       | -0.669455772 | 1.26009E-08 |
| CCDC89     | -0.669584234 | 3.00829E-06 |
| KRT19      | -0.67003365  | 8.24066E-06 |
| BCDIN3D    | -0.670176649 | 1.88153E-11 |
| ARID3B     | -0.670494196 | 0.044219117 |
| LRIG3      | -0.670767804 | 1.18269E-06 |
| ZNF395     | -0.671605527 | 9.20355E-06 |
| TGFB3      | -0.672072407 | 0.000166499 |
| BICRAL     | -0.673463284 | 3.92901E-07 |
| PCYT2      | -0.67400981  | 1.91444E-07 |
| FAM214A    | -0.674322233 | 1.19855E-09 |
| CASP9      | -0.67454759  | 8.40115E-09 |
| AC041040.1 | -0.674914184 | 0.03135861  |
| FZD4       | -0.675005128 | 1.96728E-07 |
| FGD4       | -0.675314773 | 0.000619853 |
| UBE3D      | -0.675349369 | 1.01286E-06 |
| KANTR      | -0.675741621 | 0.000990275 |
| TM4SF20    | -0.676122687 | 7.07447E-05 |
| AHRR       | -0.676872263 | 4.40023E-10 |
| AL136116.3 | -0.677483147 | 3.04475E-05 |
| HIST1H2AG  | -0.678124096 | 0.002775724 |
| SERTAD4    | -0.678379253 | 9.45911E-07 |
| SNX21      | -0.679172147 | 5.0155E-07  |
| LINC02202  | -0.679519755 | 1.67894E-05 |

|             |              |             |
|-------------|--------------|-------------|
| LINC00899   | -0.679622623 | 1.41768E-05 |
| ZNF573      | -0.680534173 | 5.54741E-05 |
| HDHD3       | -0.680942184 | 3.68845E-09 |
| PSG1        | -0.681422674 | 6.75546E-05 |
| THEM6       | -0.681482289 | 2.70709E-05 |
| SNHG7       | -0.682654996 | 0.000160485 |
| PLAC8       | -0.682683218 | 2.11278E-06 |
| TRIP6       | -0.682824125 | 1.27674E-06 |
| MVK         | -0.682833453 | 1.40803E-06 |
| NABP1       | -0.683205219 | 1.46519E-12 |
| AC084033.3  | -0.683466029 | 3.77849E-15 |
| FRY         | -0.68409024  | 3.75621E-07 |
| RIN1        | -0.684240483 | 2.70585E-05 |
| SLC43A1     | -0.684721475 | 8.44568E-07 |
| ATP1A1-AS1  | -0.684820347 | 0.00547937  |
| FAM86HP     | -0.685909583 | 0.0021324   |
| SHROOM3     | -0.686028015 | 7.73363E-08 |
| B3GALT4     | -0.686643937 | 0.000361982 |
| LINC01336   | -0.686658813 | 0.039514544 |
| CASC10      | -0.686720276 | 0.002598607 |
| HNMT        | -0.686753323 | 7.31422E-14 |
| TFAP2C      | -0.686932198 | 1.12574E-09 |
| XLOC_001583 | -0.686946677 | 0.024307929 |
| AC002456.1  | -0.687768183 | 0.011346785 |
| ZNF436-AS1  | -0.687791547 | 2.04068E-06 |
| AP002387.1  | -0.68862254  | 0.002892288 |
| AC002066.1  | -0.689025665 | 0.000559274 |
| PJKV        | -0.6892418   | 0.030661632 |
| LZTS1       | -0.689294654 | 0.033746835 |
| EFNA5       | -0.68936662  | 0.000410888 |
| ZNF30       | -0.690153114 | 0.000732303 |
| MIR4754     | -0.690172389 | 0.005406507 |
| RDH10       | -0.690833437 | 3.32305E-08 |
| LINC01534   | -0.690928657 | 0.043381403 |
| SLC25A35    | -0.692727079 | 0.0003734   |
| IDH1-AS1    | -0.692990194 | 0.022062293 |
| PWWP2B      | -0.693640973 | 0.010212817 |
| CDK15       | -0.693729566 | 1.22495E-06 |
| TMTC1       | -0.693998807 | 0.000253396 |
| NEAT1       | -0.69629009  | 5.69109E-08 |
| EPHB3       | -0.69650959  | 0.005388458 |
| TRIM2       | -0.696685296 | 8.75452E-11 |
| CACFD1      | -0.696930054 | 0.000265791 |

|             |              |             |
|-------------|--------------|-------------|
| PARD6G      | -0.69816479  | 0.041556515 |
| GPR1        | -0.699066408 | 2.82143E-16 |
| CATSPER1    | -0.699258756 | 0.000293828 |
| DLEU1       | -0.699463072 | 3.40536E-07 |
| AL163051.1  | -0.700430751 | 0.041006466 |
| CFL1P1      | -0.701482569 | 0.043277797 |
| EFCAB7      | -0.701835793 | 3.59679E-06 |
| MTERF2      | -0.702010418 | 2.42183E-09 |
| FAM111B     | -0.702436754 | 0.002879333 |
| AVPI1       | -0.702548076 | 1.46151E-08 |
| E2F8        | -0.706114864 | 0.014999597 |
| LINC01778   | -0.706290158 | 0.025874732 |
| RAB3D       | -0.706331769 | 3.94378E-08 |
| AC010245.2  | -0.706648371 | 0.043392342 |
| FAT4        | -0.707348374 | 1.77623E-11 |
| CDON        | -0.70747496  | 0.012725256 |
| HOXA10-AS   | -0.708137803 | 0.000216315 |
| XLOC_002344 | -0.708385603 | 0.024522012 |
| AC008035.1  | -0.708597329 | 0.006997633 |
| STAMBPL1    | -0.711519628 | 5.70061E-08 |
| AC080023.1  | -0.71218893  | 0.000118809 |
| ZNF503-AS2  | -0.714166335 | 8.26013E-05 |
| CCDC171     | -0.715087585 | 0.000363842 |
| SSC4D       | -0.716741254 | 0.024363543 |
| FAM20A      | -0.716846754 | 0.001331259 |
| RASGRP2     | -0.716898498 | 0.007356612 |
| YPEL3       | -0.717694518 | 1.30027E-08 |
| PDZD7       | -0.720642698 | 0.014542422 |
| KIF13B      | -0.721457662 | 0.001272847 |
| GHR         | -0.721693966 | 0.02609798  |
| ARHGAP35    | -0.723496809 | 1.04373E-12 |
| PPFIA3      | -0.723551028 | 0.034196696 |
| ROR1        | -0.724190227 | 5.76902E-05 |
| GDPD5       | -0.724332806 | 6.60815E-05 |
| RCCD1       | -0.724553146 | 1.59473E-08 |
| AC010864.1  | -0.725114039 | 0.035457561 |
| HTR7P1      | -0.726106114 | 0.001939989 |
| HOXC4       | -0.726170875 | 5.15208E-07 |
| PPIEL       | -0.726571615 | 0.000708975 |
| LACTB2      | -0.727638442 | 8.07924E-25 |
| TMEM131L    | -0.728232555 | 0.00012733  |
| XLOC_010145 | -0.731688447 | 9.61949E-06 |
| HSPB2       | -0.731724231 | 2.31923E-06 |

|             |              |             |
|-------------|--------------|-------------|
| DLGAP1      | -0.731974162 | 0.040983966 |
| ISCA2       | -0.732961883 | 4.39275E-20 |
| XLOC_004049 | -0.733624125 | 2.04846E-11 |
| SOCS3       | -0.733643624 | 0.000143923 |
| PAXIP1-AS1  | -0.736162102 | 0.00289157  |
| XLOC_008704 | -0.737045271 | 0.0129536   |
| LYPD6B      | -0.737501132 | 3.20496E-14 |
| SBF2        | -0.737527102 | 6.31149E-11 |
| MYH2        | -0.737616355 | 0.026626627 |
| XLOC_001188 | -0.739581316 | 5.84514E-05 |
| FAM86C2P    | -0.739665351 | 0.000651869 |
| LBH         | -0.739973415 | 1.50928E-07 |
| AC097534.2  | -0.740011903 | 3.35214E-12 |
| LINC01956   | -0.745110308 | 0.005945065 |
| VMAC        | -0.746341521 | 2.20524E-05 |
| AMIGO1      | -0.746606517 | 0.041805576 |
| AC106782.2  | -0.746701913 | 0.009063589 |
| CDHR3       | -0.747226486 | 0.000265418 |
| HRAT17      | -0.747956655 | 0.001263045 |
| LY6G5C      | -0.748794169 | 0.004409928 |
| SLC46A1     | -0.750386068 | 5.26036E-05 |
| RAET1E      | -0.750544308 | 0.038757122 |
| GTF2IP20    | -0.752147964 | 0.018862317 |
| AC011451.3  | -0.752456767 | 0.011306126 |
| NR1D2       | -0.754375967 | 4.26042E-14 |
| ZBED3       | -0.755129946 | 0.049884554 |
| IQCC        | -0.755426082 | 0.00860637  |
| CCDC163     | -0.7561183   | 0.014095799 |
| SH2D4A      | -0.756480004 | 5.03719E-16 |
| HAND2       | -0.75652784  | 0.00152773  |
| SEMA6A      | -0.757133549 | 0.005523038 |
| LURAP1      | -0.757601102 | 1.16079E-05 |
| XLOC_007462 | -0.758726375 | 0.005848051 |
| SHROOM2     | -0.760549154 | 0.00895396  |
| S100A5      | -0.761541558 | 0.013574522 |
| GYG2        | -0.762022525 | 0.008367385 |
| AC139530.1  | -0.762351167 | 0.000127228 |
| EIF3J-DT    | -0.764222759 | 8.31799E-14 |
| AP001160.2  | -0.764793547 | 0.025755978 |
| TMEM155     | -0.765931613 | 1.27289E-05 |
| C16orf86    | -0.766549358 | 0.000163837 |
| AL035563.1  | -0.766637254 | 0.021966271 |
| ZNF497      | -0.766686573 | 0.011984889 |

|             |              |             |
|-------------|--------------|-------------|
| LINC00476   | -0.766856328 | 4.80962E-08 |
| ABHD6       | -0.767920117 | 0.00014693  |
| PRKG2       | -0.769176648 | 0.041919775 |
| ZNF540      | -0.770635177 | 0.003554333 |
| CCDC121     | -0.771604137 | 0.013115173 |
| ADAMTS1     | -0.774414788 | 4.66301E-13 |
| ATP6V1G3    | -0.775420725 | 0.000290283 |
| AL121672.3  | -0.776013998 | 0.025712056 |
| SLC27A3     | -0.7763212   | 0.004446034 |
| VWA5A       | -0.776941278 | 1.22099E-09 |
| ARIH2OS     | -0.777560511 | 0.000174882 |
| LINC00342   | -0.778917084 | 0.002537916 |
| LGR5        | -0.779118115 | 0.000420271 |
| SREBF2-AS1  | -0.78016545  | 2.41899E-07 |
| EPHA5       | -0.780916648 | 0.043105276 |
| KRTAP2-3    | -0.780995346 | 0.000124452 |
| AC009061.2  | -0.781472343 | 0.012406184 |
| AC137767.1  | -0.78220301  | 0.000140321 |
| TIMP4       | -0.782562016 | 0.013584073 |
| LINC00265   | -0.782651423 | 0.035732218 |
| AC093323.1  | -0.782767723 | 0.007754024 |
| C14orf93    | -0.78285102  | 7.85515E-07 |
| HOXC8       | -0.782855856 | 4.10339E-09 |
| SPSB2       | -0.783060085 | 6.12459E-13 |
| GPRC5A      | -0.783322739 | 4.59771E-09 |
| LINC00886   | -0.783822349 | 3.37264E-05 |
| KCNK2       | -0.783956823 | 6.54688E-15 |
| ETV1        | -0.784756675 | 6.16798E-05 |
| KIF18A      | -0.784831488 | 1.43056E-05 |
| AL356515.1  | -0.78517096  | 9.11172E-06 |
| XLOC_009668 | -0.786689843 | 0.014331954 |
| GPAT3       | -0.790481183 | 0.010846329 |
| LINC01089   | -0.790612167 | 8.12515E-07 |
| LINC00346   | -0.790783043 | 0.005350717 |
| AC007114.1  | -0.791007028 | 0.012581995 |
| RPP25       | -0.79125934  | 0.000217037 |
| AGFG2       | -0.791727239 | 0.000688371 |
| EFNB2       | -0.791897161 | 0.000109603 |
| RGS14       | -0.792258797 | 0.0093993   |
| CCDC88B     | -0.792518304 | 0.005287797 |
| CCDC30      | -0.79295691  | 0.002167746 |
| AC007098.1  | -0.793541719 | 5.10963E-05 |
| AC107294.2  | -0.794815619 | 0.00160942  |

|             |              |             |
|-------------|--------------|-------------|
| CPLANE2     | -0.795244761 | 0.000781064 |
| NRK         | -0.796260084 | 0.006523386 |
| ALDH3A1     | -0.796864188 | 0.044003542 |
| ZNF214      | -0.799869337 | 0.001358808 |
| AJUBA       | -0.801321885 | 2.82527E-09 |
| AC108488.1  | -0.801717457 | 1.76077E-11 |
| AKAP1       | -0.802917144 | 1.13615E-06 |
| THAP7-AS1   | -0.804464805 | 3.10925E-05 |
| AL358472.4  | -0.804994181 | 0.001059119 |
| SAMD3       | -0.805040751 | 0.007668652 |
| AL355338.1  | -0.805245747 | 1.79087E-09 |
| SAMD12      | -0.805465708 | 6.11313E-05 |
| FAM185BP    | -0.805872935 | 0.035913881 |
| SCOC-AS1    | -0.80618001  | 0.004747244 |
| AL354920.1  | -0.808384357 | 2.43656E-06 |
| NCK1-DT     | -0.808389683 | 4.54667E-06 |
| METTL21A    | -0.808477247 | 2.43768E-20 |
| FLJ31356    | -0.811553366 | 0.009048908 |
| STAM-AS1    | -0.812106724 | 0.011163605 |
| SATB2-AS1   | -0.812817218 | 0.012249987 |
| AL390955.2  | -0.815144173 | 5.29053E-05 |
| MINDY1      | -0.815223959 | 5.58379E-14 |
| AC138696.2  | -0.816004229 | 0.003101845 |
| LINC01301   | -0.816815502 | 0.006202589 |
| MGARP       | -0.817044834 | 7.07004E-21 |
| APOC1       | -0.817988249 | 0.038743982 |
| TBX15       | -0.819146432 | 2.59459E-13 |
| C15orf65    | -0.81942498  | 4.07278E-09 |
| SAC3D1      | -0.8202915   | 0.011355076 |
| SETDB2      | -0.820938142 | 2.0185E-08  |
| AP001189.5  | -0.821122611 | 0.049400449 |
| ZSCAN23     | -0.821772774 | 0.011456483 |
| SNX18       | -0.822367772 | 5.46754E-13 |
| BFSP1       | -0.822433929 | 0.003503731 |
| TMEM246     | -0.822463673 | 2.17176E-16 |
| PXN-AS1     | -0.823308487 | 1.38673E-05 |
| HSD11B1L    | -0.823445478 | 1.30587E-07 |
| TACC2       | -0.823510721 | 2.97925E-11 |
| RHOBTB1     | -0.824295815 | 4.51542E-12 |
| RAB11FIP2   | -0.826982692 | 5.7839E-13  |
| XLOC_002951 | -0.827287392 | 0.037479007 |
| LINC01788   | -0.827395037 | 0.002625983 |
| TRIM45      | -0.827977616 | 0.00183724  |

|               |              |             |
|---------------|--------------|-------------|
| CDKN1C        | -0.830112399 | 1.72195E-10 |
| LINC00884     | -0.833370296 | 0.010883549 |
| TMCC1-AS1     | -0.833390928 | 0.017661255 |
| SYTL2         | -0.833982893 | 8.43699E-17 |
| ARHGAP28      | -0.834285676 | 0.000322527 |
| XLOC_000294   | -0.835440158 | 0.03017744  |
| RENBP         | -0.837340322 | 0.000278611 |
| KRT80         | -0.837628824 | 0.006254427 |
| TRIM46        | -0.838332829 | 0.012379389 |
| AP001107.5    | -0.839418471 | 0.011078199 |
| KIZ           | -0.840802381 | 2.09676E-15 |
| ARHGEF26      | -0.841261087 | 0.02451578  |
| ID2           | -0.8413653   | 5.017E-11   |
| BDH1          | -0.842000853 | 1.62149E-07 |
| AL137779.2    | -0.842136413 | 0.015311745 |
| HOXA13        | -0.842566673 | 0.014496365 |
| PHF7          | -0.843231293 | 6.46661E-06 |
| COQ10A        | -0.843240827 | 2.15886E-10 |
| NDUFA6-DT     | -0.843469967 | 0.020071466 |
| CAMK2G        | -0.844437634 | 5.40685E-22 |
| MITF          | -0.844618845 | 7.56906E-05 |
| LMOD1         | -0.844738704 | 1.04733E-19 |
| AP001372.2    | -0.844748904 | 0.030967265 |
| MKNK2         | -0.844881119 | 1.07921E-12 |
| TCF7L2        | -0.845405951 | 6.86391E-13 |
| CHAC1         | -0.845728309 | 1.56643E-06 |
| TMEM37        | -0.845910732 | 0.00175395  |
| ANO3          | -0.847067722 | 0.001646931 |
| CHN2          | -0.847162175 | 0.029750915 |
| ARHGEF4       | -0.847649773 | 8.95705E-06 |
| MC1R          | -0.847656837 | 0.045026579 |
| RP11-436G20.1 | -0.849647502 | 0.044779716 |
| AL355472.1    | -0.849707601 | 0.000889651 |
| SFTA1P        | -0.850710713 | 1.24745E-05 |
| GUCY1B1       | -0.851030554 | 1.43521E-05 |
| CABCOCO1      | -0.852782268 | 1.25014E-06 |
| AKAP6         | -0.854143586 | 1.20121E-08 |
| AP002026.1    | -0.854614299 | 3.26686E-07 |
| ID2-AS1       | -0.855263576 | 0.034202293 |
| FSIP1         | -0.85661365  | 1.08873E-06 |
| KLRA1P        | -0.858997515 | 0.014001157 |
| ZNF385D       | -0.862484451 | 6.22663E-08 |
| NR1D1         | -0.862946721 | 8.67489E-07 |



|             |              |             |
|-------------|--------------|-------------|
| XLOC_004198 | -0.862962681 | 0.002210393 |
| XLOC_005361 | -0.86341112  | 0.012693628 |
| AC023509.4  | -0.865018591 | 0.029989646 |
| AP001107.3  | -0.865832486 | 0.02586996  |
| MYO1H       | -0.865956056 | 0.009116343 |
| FAM218A     | -0.865959298 | 2.06359E-06 |
| SYP         | -0.866519963 | 0.00807879  |
| BAG2        | -0.867885869 | 6.17962E-18 |
| AXIN2       | -0.868835468 | 1.40804E-05 |
| ZBTB18      | -0.869209626 | 7.55165E-11 |
| AC244258.1  | -0.871261884 | 5.80421E-09 |
| AC098820.1  | -0.873181189 | 0.027782465 |
| XLOC_001460 | -0.873243075 | 0.022641977 |
| AP002884.1  | -0.873868462 | 1.85343E-16 |
| SLC25A42    | -0.873944338 | 7.31247E-06 |
| MKX         | -0.874353895 | 6.21985E-11 |
| ABHD15      | -0.874837478 | 7.44357E-05 |
| XLOC_011753 | -0.874895089 | 0.032756479 |
| LINC01118   | -0.87491022  | 0.000106355 |
| OXCT2P1     | -0.875048175 | 0.000801824 |
| CDKN2C      | -0.877433046 | 1.63638E-16 |
| AL157402.2  | -0.877845914 | 2.73822E-16 |
| XLOC_002900 | -0.87817176  | 2.78155E-08 |
| MISP3       | -0.878251503 | 0.002668761 |
| NRXN2       | -0.879541313 | 9.82758E-08 |
| PLPP6       | -0.879815324 | 1.22097E-07 |
| C15orf61    | -0.8801347   | 1.10635E-15 |
| IQCH-AS1    | -0.880224077 | 2.97218E-07 |
| ZKSCAN7     | -0.88142366  | 1.33097E-05 |
| MDH1B       | -0.882182705 | 0.042021131 |
| FAHD2CP     | -0.883039969 | 1.09511E-07 |
| AL353626.2  | -0.883666898 | 0.044528996 |
| ZC2HC1C     | -0.885697335 | 0.007809414 |
| RIMS1       | -0.887883261 | 1.32417E-07 |
| RAB3IL1     | -0.887901547 | 0.000684415 |
| AC012615.1  | -0.889935318 | 0.000190731 |
| WDR63       | -0.890102555 | 0.000316471 |
| AL359513.1  | -0.890103179 | 0.005833954 |
| PLEKHG3     | -0.891418008 | 0.006966686 |
| IQCD        | -0.891726028 | 0.001609153 |
| KIAA0895    | -0.892112159 | 0.038479398 |
| AL136164.3  | -0.893964155 | 0.01294168  |
| ZNF815P     | -0.895430476 | 0.007763345 |

|              |              |             |
|--------------|--------------|-------------|
| KIAA1958     | -0.895524315 | 0.000674418 |
| USP44        | -0.896152774 | 0.044301237 |
| G35570       | -0.89646643  | 0.001241643 |
| SYCP2        | -0.897168885 | 0.000444079 |
| G23966       | -0.897574548 | 0.000782897 |
| GSN-AS1      | -0.899396457 | 0.000239132 |
| AC063944.1   | -0.899563544 | 0.00813381  |
| AL356277.3   | -0.899687698 | 0.000413427 |
| LINC01094    | -0.900358967 | 2.13258E-09 |
| FAM84A       | -0.902982474 | 1.07926E-06 |
| AC110597.1   | -0.904157984 | 0.013380865 |
| AL139156.2   | -0.904885235 | 0.018892389 |
| MIR616       | -0.90582639  | 0.000410927 |
| G4361        | -0.907831014 | 0.032187434 |
| NUDT6        | -0.90796311  | 1.71345E-13 |
| KCTD21-AS1   | -0.908075418 | 0.002965797 |
| HAGLROS      | -0.908080907 | 0.027729914 |
| C21orf62-AS1 | -0.908129078 | 0.003530895 |
| TMEM144      | -0.908316708 | 0.000118245 |
| AC016355.1   | -0.91117495  | 0.038823618 |
| USP3-AS1     | -0.912642222 | 0.037957302 |
| SPAAR        | -0.912765173 | 0.044140463 |
| USP51        | -0.912952819 | 0.032278221 |
| AC245060.5   | -0.913126563 | 0.013489645 |
| PSTPIP1      | -0.914347223 | 0.047873718 |
| C11orf45     | -0.914829626 | 0.016754306 |
| FRMD4B       | -0.914981177 | 0.012720912 |
| AP001033.1   | -0.915447775 | 0.023487292 |
| BMF          | -0.915644853 | 0.039865205 |
| EBF1         | -0.915917425 | 8.12189E-15 |
| LINC01011    | -0.91648847  | 0.005669855 |
| TMEM169      | -0.917259217 | 0.04516727  |
| CYP26B1      | -0.917818363 | 0.007675751 |
| LINC00663    | -0.920384814 | 0.018487185 |
| TRIB3        | -0.9206727   | 2.48997E-09 |
| HOXA6        | -0.922856318 | 0.033784986 |
| RASSF7       | -0.923072642 | 5.23482E-07 |
| DEPDC4       | -0.923522765 | 0.001796549 |
| EIF1B-AS1    | -0.925567262 | 0.000429105 |
| MAN1C1       | -0.927705584 | 4.75216E-07 |
| SYDE2        | -0.927845411 | 0.000690365 |
| PDE1A        | -0.928450675 | 1.14498E-06 |
| AC022400.1   | -0.929588701 | 0.043596506 |

|               |              |             |
|---------------|--------------|-------------|
| DKFZp779M0652 | -0.929767026 | 0.009805367 |
| AC103702.1    | -0.929999435 | 5.30167E-07 |
| PHOSPHO2      | -0.93034273  | 3.73318E-08 |
| GCHFR         | -0.931257788 | 0.009912406 |
| AC004812.2    | -0.931460007 | 0.023789423 |
| GDF15         | -0.93148091  | 2.57818E-07 |
| FAM221A       | -0.931993322 | 0.029511828 |
| ABCA7         | -0.932169006 | 0.042118768 |
| PRR15         | -0.932296851 | 0.000949644 |
| LRRC8B        | -0.932414338 | 0.024541097 |
| ITGA9-AS1     | -0.932459842 | 3.9392E-07  |
| AC009414.2    | -0.932708642 | 4.62299E-06 |
| ZSCAN31       | -0.933223485 | 0.000851002 |
| IRAK1BP1      | -0.933960505 | 1.05005E-09 |
| ANKRD65       | -0.935220002 | 0.046199521 |
| AP003469.4    | -0.935721853 | 0.003264447 |
| AL109918.1    | -0.936284386 | 3.86297E-09 |
| NEURL2        | -0.937300186 | 0.029518278 |
| MAF           | -0.937674257 | 4.26289E-12 |
| XLOC_009060   | -0.937998246 | 2.98429E-06 |
| ANKRD33B      | -0.938154291 | 0.017377516 |
| ZFP2          | -0.938693649 | 0.000288602 |
| SEL1L2        | -0.939479133 | 4.07278E-09 |
| AL512329.2    | -0.942088373 | 0.048666594 |
| AC004477.1    | -0.94273478  | 0.001773915 |
| ABHD8         | -0.944329457 | 0.00261225  |
| RAB11FIP1     | -0.944700605 | 8.75767E-08 |
| HOXB-AS3      | -0.947258104 | 5.10239E-21 |
| AC114763.1    | -0.948631012 | 0.013448242 |
| HESX1         | -0.949278787 | 0.01837994  |
| AC116914.2    | -0.950256614 | 0.036111804 |
| HOXB3         | -0.951076145 | 1.2324E-10  |
| C2orf81       | -0.951684314 | 6.22461E-08 |
| XLOC_003471   | -0.952837181 | 0.010396866 |
| KITLG         | -0.953761529 | 1.74878E-11 |
| GACAT2        | -0.956318339 | 5.16588E-05 |
| MAP3K12       | -0.956521365 | 0.000732587 |
| LINC00517     | -0.957041075 | 0.000243217 |
| TMEM86A       | -0.957869795 | 2.03899E-07 |
| FAM86FP       | -0.958911382 | 1.0687E-10  |
| G39927        | -0.959496437 | 0.006910938 |
| KCNMB4        | -0.960848342 | 0.020069244 |
| HOXC5         | -0.961950036 | 7.2711E-05  |

|             |              |             |
|-------------|--------------|-------------|
| LHX9        | -0.962302262 | 3.01932E-08 |
| AC007541.1  | -0.962322801 | 0.00831917  |
| SH2D5       | -0.96241334  | 0.007356612 |
| C9orf170    | -0.965247789 | 0.021882738 |
| CNNM1       | -0.96561532  | 0.045069715 |
| AC023794.3  | -0.966515903 | 1.03775E-05 |
| AL021368.2  | -0.97007977  | 0.001303101 |
| IL20RA      | -0.970141802 | 0.001420226 |
| XLOC_002952 | -0.970620586 | 1.93538E-05 |
| LINC01637   | -0.97175423  | 5.52209E-08 |
| AL138756.1  | -0.973524206 | 0.041360921 |
| ANKRD35     | -0.974040092 | 5.55281E-11 |
| MTSS1L      | -0.975060261 | 9.0803E-06  |
| RIMKLBP2    | -0.975784511 | 0.040099155 |
| NOSTRIN     | -0.976127394 | 0.001977932 |
| AL022476.1  | -0.97673831  | 0.027327475 |
| CDC20P1     | -0.976811001 | 0.010608274 |
| MIR99AHG    | -0.978023336 | 2.2973E-09  |
| AL049838.1  | -0.980468204 | 0.000868124 |
| LINC00211   | -0.981971769 | 0.010890619 |
| PPP1R26-AS1 | -0.982478045 | 0.035379753 |
| LIPT2       | -0.982842749 | 2.30513E-05 |
| PITPNA-AS1  | -0.983385496 | 3.04975E-09 |
| ARRDC4      | -0.983599359 | 5.3674E-13  |
| DNAJC28     | -0.98607899  | 1.1323E-05  |
| AC107884.1  | -0.987978639 | 0.002259003 |
| XLOC_000566 | -0.988243716 | 0.021733457 |
| HOXC6       | -0.989364513 | 4.57949E-10 |
| ATP8B1      | -0.989635046 | 3.0521E-25  |
| ALG1L9P     | -0.991044314 | 0.031688303 |
| RCAN2       | -0.991118772 | 2.48424E-13 |
| PLD1        | -0.991140592 | 2.30491E-05 |
| CTXN1       | -0.994470884 | 0.005917797 |
| AL022157.1  | -0.994762333 | 0.036031243 |
| ZMYND10     | -0.99547286  | 0.003567155 |
| NUDT18      | -0.996892606 | 2.43694E-06 |
| TMC3-AS1    | -0.997222397 | 1.72384E-07 |
| BX537318.1  | -0.99884777  | 0.000154485 |
| PTPRH       | -0.999778771 | 0.038197526 |
| SLC26A1     | -1.001291437 | 0.04674688  |
| TSPAN10     | -1.00267807  | 0.000225742 |
| SPEG        | -1.005415987 | 2.24923E-11 |
| LINC01936   | -1.00655512  | 0.027547013 |

|            |              |             |
|------------|--------------|-------------|
| AC106791.1 | -1.006856371 | 0.036921981 |
| AP003068.2 | -1.009817161 | 0.018931179 |
| ZNF781     | -1.011628742 | 0.015780603 |
| TRIM7      | -1.013502541 | 0.001212727 |
| AC025181.2 | -1.013940829 | 0.000931547 |
| AC007383.2 | -1.016147614 | 5.89687E-05 |
| CBX8       | -1.016295969 | 3.53276E-07 |
| SLC11A1    | -1.016940096 | 0.000517189 |
| ELOA-AS1   | -1.020062828 | 3.67245E-06 |
| AC105383.1 | -1.020466483 | 0.046841624 |
| DAPK1      | -1.02237943  | 3.77405E-06 |
| KCTD4      | -1.025438919 | 2.49461E-06 |
| CPEB1      | -1.025650796 | 0.009085457 |
| TTC28-AS1  | -1.025730444 | 9.30897E-08 |
| CCDC136    | -1.026775957 | 2.00692E-07 |
| AC037486.1 | -1.027148816 | 0.027685051 |
| PRCD       | -1.027202945 | 0.049504644 |
| AP005264.7 | -1.028589916 | 0.036233955 |
| LINC01134  | -1.029999513 | 0.036264602 |
| PLD6       | -1.034558699 | 5.04427E-05 |
| SNORA77    | -1.035331206 | 0.012634529 |
| CNKSR3     | -1.035571853 | 2.38769E-05 |
| MRVI1      | -1.03797081  | 2.86832E-27 |
| TIGD2      | -1.038624078 | 7.60107E-08 |
| AL590822.1 | -1.039508295 | 0.002386738 |
| GDPGP1     | -1.040318772 | 1.67719E-05 |
| ZNF589     | -1.041951992 | 9.38324E-07 |
| AC089983.1 | -1.04199544  | 1.34491E-06 |
| GIPR       | -1.042126078 | 0.02628216  |
| PKIB       | -1.043014249 | 0.017189526 |
| RASIP1     | -1.046414328 | 0.002040537 |
| HOXA1      | -1.046423544 | 0.026991344 |
| GVQW3      | -1.04679849  | 0.011512939 |
| HDAC2-AS2  | -1.046909294 | 0.000239249 |
| MORN3      | -1.048105232 | 0.00250706  |
| LINC02019  | -1.050153023 | 0.001361097 |
| LINC01563  | -1.052137735 | 0.027978674 |
| ZNF33B     | -1.053995757 | 1.87652E-06 |
| AL365214.2 | -1.054288195 | 0.023772086 |
| AMOT       | -1.054392239 | 6.07707E-07 |
| CHDH       | -1.054774858 | 0.027206849 |
| NR2F2      | -1.055130346 | 2.9614E-21  |
| ANKRD30B   | -1.056646276 | 0.001962295 |

|             |              |             |
|-------------|--------------|-------------|
| PWAR6       | -1.057138553 | 0.011147712 |
| SEPSECS-AS1 | -1.057261592 | 0.001054828 |
| XLOC_000403 | -1.05787708  | 0.006783137 |
| THAP8       | -1.060036163 | 5.00973E-16 |
| SBF2-AS1    | -1.060043623 | 9.36284E-21 |
| Z99289.1    | -1.060102651 | 0.037456146 |
| TGFBR3      | -1.061119512 | 4.03713E-15 |
| TEF         | -1.061630602 | 2.78678E-06 |
| PURPL       | -1.064638193 | 0.000619362 |
| ARMC4       | -1.065421969 | 8.74379E-06 |
| L3MBTL1     | -1.068161798 | 0.00110191  |
| RABGAP1     | -1.071916924 | 3.19061E-19 |
| ZIC4        | -1.072342917 | 0.002628988 |
| MEIS2       | -1.076251595 | 2.16809E-21 |
| GPR39       | -1.077576397 | 0.025924055 |
| MYCBPAP     | -1.080908378 | 0.031218507 |
| MTCL1       | -1.082386142 | 6.78287E-12 |
| 44264       | -1.084357207 | 0.001206749 |
| AC013394.1  | -1.084446813 | 0.028714319 |
| CHRM2       | -1.085668222 | 0.001262182 |
| AC023632.2  | -1.087019418 | 0.040849543 |
| DPH6-DT     | -1.087142951 | 0.002965262 |
| ERICH5      | -1.087711211 | 0.000308575 |
| FAM217B     | -1.088220568 | 1.39652E-11 |
| BDNF        | -1.08869033  | 4.50097E-09 |
| FAM198B-AS1 | -1.088745663 | 4.22397E-06 |
| AC138150.2  | -1.088797083 | 0.000665662 |
| ANKEF1      | -1.089500906 | 1.36391E-05 |
| AC114284.1  | -1.090475139 | 3.91428E-10 |
| SPIN2A      | -1.091508241 | 0.000205315 |
| XLOC_011981 | -1.092225833 | 0.009637666 |
| AQP11       | -1.09333246  | 1.07306E-05 |
| FAM13C      | -1.095811974 | 0.018967684 |
| LENG9       | -1.097748576 | 0.020175093 |
| PKP3        | -1.099658461 | 0.007097608 |
| SUSD3       | -1.0999014   | 0.018866272 |
| XLOC_002888 | -1.100801377 | 0.025374567 |
| NR3C2       | -1.100853377 | 0.002697617 |
| STON2       | -1.101466132 | 0.001264632 |
| SLC38A4     | -1.103765272 | 0.000410365 |
| AP001273.1  | -1.105210807 | 0.017504753 |
| AL035448.1  | -1.110071104 | 0.011856883 |
| SALL2       | -1.11057036  | 0.042550495 |

|             |              |             |
|-------------|--------------|-------------|
| SSR4P1      | -1.110763352 | 0.028188896 |
| LINC02595   | -1.110897762 | 8.23078E-11 |
| AC016757.1  | -1.113593734 | 0.034581575 |
| NXNL2       | -1.114911639 | 3.31386E-07 |
| BX284668.4  | -1.114950385 | 9.13599E-08 |
| MAOA        | -1.115236482 | 7.23277E-05 |
| CYYR1-AS1   | -1.115437156 | 0.004610615 |
| AL355001.2  | -1.117258393 | 0.000546989 |
| LINC01569   | -1.120540004 | 0.012479274 |
| LINC00840   | -1.12242339  | 4.37757E-05 |
| SEC31B      | -1.12289173  | 0.002571863 |
| ARL4D       | -1.123356682 | 2.75739E-15 |
| RUNX1T1     | -1.126520541 | 2.73645E-18 |
| AC254633.1  | -1.127896921 | 0.000253053 |
| KCNJ2       | -1.130315958 | 8.13404E-07 |
| TFAP4       | -1.133464571 | 1.70087E-07 |
| AL161911.1  | -1.133613692 | 0.031635005 |
| FAM86JP     | -1.134513298 | 0.000101014 |
| RPARP-AS1   | -1.136548935 | 0.002342909 |
| AC090877.1  | -1.136567077 | 0.043343505 |
| CPA3        | -1.137012759 | 0.017085902 |
| METTL7B     | -1.137033956 | 1.60697E-05 |
| ANXA9       | -1.137900641 | 0.00037363  |
| PRICKLE1    | -1.138043681 | 9.21855E-12 |
| DNAJC9-AS1  | -1.138173344 | 1.3493E-06  |
| LINC00565   | -1.139230606 | 3.71059E-07 |
| ADRA2A      | -1.139317782 | 1.81756E-07 |
| INHBE       | -1.139400651 | 3.3232E-07  |
| CCNO        | -1.14167881  | 0.001914147 |
| SOCS2       | -1.144370526 | 3.718E-16   |
| LNX2        | -1.144943717 | 4.05141E-07 |
| OSR2        | -1.146931448 | 1.94744E-05 |
| XLOC_001374 | -1.147502073 | 0.038792507 |
| LINC01546   | -1.147585879 | 0.005540263 |
| AC005532.1  | -1.150718926 | 0.031166283 |
| PPARG       | -1.152746939 | 5.00705E-06 |
| FALEC       | -1.156591    | 0.004353811 |
| SIM1        | -1.158209345 | 5.76036E-14 |
| AL133355.1  | -1.158668446 | 0.04105462  |
| THRB        | -1.160948262 | 1.01345E-14 |
| IGSF10      | -1.16148162  | 0.001954413 |
| LINC00547   | -1.163174292 | 4.52475E-05 |
| ZIC1        | -1.164022089 | 2.60823E-06 |

|            |              |             |
|------------|--------------|-------------|
| HOXA10     | -1.164116017 | 2.99276E-18 |
| MYO15B     | -1.164712302 | 0.032064615 |
| AC092171.5 | -1.165499517 | 1.47518E-11 |
| PSCA       | -1.167374878 | 1.27014E-06 |
| AL357146.1 | -1.170949176 | 0.000421063 |
| CCDC54     | -1.171063589 | 0.023696789 |
| PPL        | -1.17111461  | 0.000289508 |
| SOX12      | -1.171234238 | 2.04846E-11 |
| STXBP6     | -1.173415249 | 6.9119E-05  |
| BCL11B     | -1.174173717 | 0.007770965 |
| DDIT3      | -1.17420705  | 5.9677E-23  |
| SIRT4      | -1.175898709 | 2.6898E-06  |
| AC108062.1 | -1.176400753 | 0.000175143 |
| CPAMD8     | -1.177707053 | 0.009041246 |
| IMPA2      | -1.179568347 | 1.04529E-05 |
| LINC02550  | -1.180017686 | 0.034524516 |
| AC007906.2 | -1.181214525 | 0.022415258 |
| GRPR       | -1.182537686 | 0.000674359 |
| SEMA3B-AS1 | -1.184851764 | 0.005926325 |
| AC006273.1 | -1.184882451 | 0.018487185 |
| 44256      | -1.18613382  | 0.003221907 |
| AP001092.1 | -1.187466584 | 0.006587922 |
| AF186192.2 | -1.189112694 | 0.024301739 |
| LRRK2      | -1.190293102 | 1.83468E-05 |
| RXFP1      | -1.190574726 | 0.000919351 |
| ACSS1      | -1.191440691 | 0.001136813 |
| AL162231.2 | -1.194143852 | 4.86327E-06 |
| NATD1      | -1.19439317  | 1.0959E-13  |
| ZNF192P1   | -1.195107355 | 0.003510284 |
| FLRT3      | -1.196335554 | 0.00090811  |
| ARHGEF37   | -1.196819367 | 0.000354988 |
| HOXA5      | -1.206437287 | 0.002607947 |
| LKAAEAR1   | -1.20715171  | 0.039788644 |
| LACTB2-AS1 | -1.210242319 | 0.001452393 |
| PCSK4      | -1.211182088 | 0.011019589 |
| ZMAT4      | -1.211530809 | 0.020479943 |
| SSTR1      | -1.211637805 | 4.94006E-09 |
| STX18-AS1  | -1.212828157 | 1.19572E-05 |
| PALMD      | -1.212893317 | 1.03279E-07 |
| GAS1RR     | -1.213876211 | 2.207E-15   |
| EMX2       | -1.214432859 | 6.26435E-30 |
| AC011389.1 | -1.216927119 | 0.005417336 |
| AC011444.1 | -1.220346481 | 0.003712723 |



|             |              |             |
|-------------|--------------|-------------|
| SUCLA2-AS1  | -1.221107056 | 0.005577287 |
| TWIST1      | -1.221667862 | 8.19917E-25 |
| DEF6        | -1.222618662 | 0.017794417 |
| AC090360.1  | -1.225079766 | 0.041241039 |
| ID4         | -1.22639994  | 4.53949E-09 |
| SNORA26     | -1.226759604 | 0.001453377 |
| AC023908.3  | -1.227953203 | 0.000901416 |
| PCDH18      | -1.237755142 | 2.05733E-14 |
| NBEAL2      | -1.237798661 | 0.007258249 |
| A2M-AS1     | -1.238965548 | 0.031104571 |
| TNFRSF19    | -1.240348528 | 9.28348E-19 |
| AC007953.1  | -1.243066662 | 0.006492534 |
| SLC14A1     | -1.244632249 | 0.000104897 |
| XLOC_002925 | -1.24548986  | 0.011462165 |
| RGMA        | -1.246317492 | 6.14848E-08 |
| CALCRL      | -1.248165453 | 3.63552E-05 |
| AL023581.2  | -1.2482637   | 0.027979542 |
| AP001412.1  | -1.250296544 | 0.042403595 |
| LINC01085   | -1.252138175 | 0.000185684 |
| LINC01111   | -1.252834949 | 0.007819261 |
| AC004130.1  | -1.253112449 | 0.000155135 |
| HRCT1       | -1.253845054 | 1.6314E-09  |
| MAMSTR      | -1.254939098 | 2.49977E-08 |
| AC010173.1  | -1.25642481  | 0.00406321  |
| DEPTOR      | -1.256621317 | 5.71298E-18 |
| PDE3A       | -1.256878286 | 5.58574E-07 |
| TNKS2-AS1   | -1.258798111 | 0.02638949  |
| ZNF713      | -1.259181952 | 0.005483368 |
| XLOC_007348 | -1.26450942  | 1.50343E-09 |
| AC005674.2  | -1.266858386 | 0.027411929 |
| TRERF1      | -1.2717067   | 2.40817E-12 |
| AC005696.1  | -1.272262338 | 0.0012896   |
| G7528       | -1.272917632 | 0.034821337 |
| AL353141.1  | -1.27339789  | 0.047045984 |
| DLK2        | -1.273424894 | 0.039358621 |
| CCDC96      | -1.275144303 | 0.003970952 |
| ANKRD34A    | -1.277581039 | 1.55386E-08 |
| ELL3        | -1.278052008 | 0.014021182 |
| AP005264.1  | -1.281527954 | 0.001974208 |
| LINC01305   | -1.283612775 | 1.5715E-05  |
| HOXA11-AS   | -1.286940851 | 3.00054E-06 |
| FBXO16      | -1.290353832 | 0.000100396 |
| EBF2        | -1.291059221 | 3.36913E-06 |

|             |              |             |
|-------------|--------------|-------------|
| XLOC_000263 | -1.291479687 | 0.029519468 |
| AL080317.2  | -1.29516111  | 0.021349577 |
| TAF1A-AS1   | -1.297774537 | 0.003631062 |
| G6313       | -1.29897857  | 2.86128E-05 |
| XLOC_007506 | -1.301791686 | 0.016160002 |
| PWAR5       | -1.302604002 | 0.018931179 |
| AC012470.1  | -1.304372764 | 0.029238485 |
| LYPLAL1-DT  | -1.306359938 | 0.03872289  |
| MYLIP       | -1.309475154 | 6.55288E-05 |
| MRGPRF      | -1.309525407 | 4.28042E-18 |
| PANO1       | -1.311659227 | 0.016965981 |
| IRX5        | -1.312806679 | 4.4431E-10  |
| LINC01550   | -1.313916698 | 0.001743483 |
| AC092171.4  | -1.314113137 | 0.037954614 |
| TET1        | -1.320402084 | 3.29733E-12 |
| ANKRD20A5P  | -1.32086814  | 0.003299484 |
| HOXB8       | -1.321955087 | 0.000716231 |
| AC131235.3  | -1.322274018 | 0.037456146 |
| XLOC_005587 | -1.323058217 | 0.004706824 |
| SYNPO2L     | -1.330538919 | 0.042309216 |
| SLC9A3-AS1  | -1.332779992 | 0.001527858 |
| HOXA9       | -1.334845738 | 6.82424E-13 |
| XLOC_002552 | -1.335119212 | 0.000201844 |
| KHK         | -1.335309287 | 0.00015579  |
| SEMA6D      | -1.338568166 | 5.1423E-08  |
| AC008507.1  | -1.339438335 | 0.016626359 |
| SLC25A27    | -1.34405467  | 3.78391E-06 |
| RASSF9      | -1.345143459 | 0.000198132 |
| AC026250.1  | -1.345727299 | 3.9159E-10  |
| RASL11A     | -1.350051192 | 0.045705126 |
| XLOC_001527 | -1.352516993 | 0.001423856 |
| LRRC20      | -1.354077354 | 0.001059145 |
| AC092171.3  | -1.363357358 | 0.023081874 |
| MBOAT1      | -1.368972227 | 0.000296014 |
| AC011365.1  | -1.369595325 | 0.013516566 |
| XLOC_011016 | -1.370734149 | 0.00099751  |
| AC107398.2  | -1.370749754 | 0.038551899 |
| MTUS2       | -1.37210199  | 2.40364E-05 |
| AC011389.3  | -1.374487587 | 0.001486547 |
| AC145285.2  | -1.37790048  | 0.009064527 |
| WEE1        | -1.381307152 | 4.54831E-20 |
| TBKBP1      | -1.382737814 | 2.05811E-07 |
| FSBP        | -1.383243769 | 0.024349039 |

|             |              |             |
|-------------|--------------|-------------|
| S1PR1       | -1.387507116 | 7.49465E-15 |
| SAMD5       | -1.387917581 | 0.006349874 |
| ADAMTS5     | -1.390902593 | 8.03715E-21 |
| GPR162      | -1.390994432 | 0.012686152 |
| OSBPL7      | -1.391340031 | 0.002386051 |
| AC092535.4  | -1.391745587 | 0.027965401 |
| XLOC_004822 | -1.391864459 | 3.21248E-09 |
| NUDT16P1    | -1.392741241 | 8.67395E-06 |
| FLJ46284    | -1.393937023 | 0.016661465 |
| ADAMTS15    | -1.400064394 | 0.042409385 |
| C19orf73    | -1.402382969 | 5.27262E-08 |
| INKA2-AS1   | -1.404374436 | 0.001477802 |
| TMEM26      | -1.407484682 | 0.000856087 |
| AC051619.5  | -1.40927144  | 0.006701838 |
| CASS4       | -1.409749689 | 0.008034768 |
| FGF10       | -1.411569865 | 1.91176E-06 |
| XLOC_012692 | -1.411586523 | 0.017411906 |
| AC087477.2  | -1.411871097 | 0.000324907 |
| ACTL10      | -1.416338836 | 0.005954013 |
| AL592158.1  | -1.416929285 | 0.003525352 |
| B4GALNT4    | -1.417780924 | 0.029107763 |
| NOG         | -1.419981269 | 3.59864E-08 |
| Z97634.1    | -1.4222595   | 0.030904729 |
| C11orf88    | -1.422813217 | 0.020278972 |
| AARD        | -1.424706854 | 1.75883E-07 |
| AL590560.1  | -1.425448363 | 0.027165317 |
| MYHAS       | -1.426365346 | 0.001750641 |
| XLOC_002543 | -1.426551105 | 0.012238273 |
| CITED2      | -1.427106996 | 1.48687E-23 |
| CISH        | -1.433114521 | 0.000144642 |
| FIGN        | -1.434400395 | 7.93807E-07 |
| NLRP10      | -1.434551653 | 1.11951E-05 |
| AC003102.1  | -1.436993697 | 1.14992E-05 |
| TRIM17      | -1.438045663 | 0.01456706  |
| AC022154.1  | -1.439726307 | 0.017533269 |
| AL359504.2  | -1.439861462 | 2.07962E-08 |
| AP000813.1  | -1.440254616 | 0.019626776 |
| REM2        | -1.441222039 | 0.010296105 |
| GCK         | -1.444918493 | 1.01056E-05 |
| MME-AS1     | -1.444934144 | 0.019924155 |
| LIPE        | -1.44661604  | 0.008180329 |
| AP000662.1  | -1.45368562  | 0.003893202 |
| SH3TC2      | -1.454211182 | 0.001593103 |

|             |              |             |
|-------------|--------------|-------------|
| LINC00484   | -1.457904898 | 0.046939286 |
| HOXA7       | -1.460175581 | 2.0474E-09  |
| INKA2       | -1.460934838 | 3.71852E-05 |
| ADIRF-AS1   | -1.465642039 | 8.11588E-06 |
| GLIPR1L1    | -1.46715802  | 0.005687953 |
| MATN1-AS1   | -1.47050419  | 0.01857694  |
| VWCE        | -1.474423506 | 0.003394424 |
| IL6R        | -1.479596661 | 6.41119E-11 |
| GDPD1       | -1.480391239 | 0.000532485 |
| CAVIN2      | -1.48281466  | 1.04826E-30 |
| KBTBD3      | -1.483539833 | 2.16651E-23 |
| AC026801.2  | -1.483553588 | 0.03600968  |
| LINC02361   | -1.48370976  | 0.015244586 |
| DDIT4L      | -1.484888191 | 2.68925E-15 |
| AP003071.4  | -1.485485017 | 0.012485713 |
| HOXA11      | -1.485818613 | 1.16371E-11 |
| MEOX2       | -1.487537438 | 1.2582E-20  |
| AC120036.3  | -1.487545711 | 4.69961E-05 |
| EYA4        | -1.487973808 | 0.01143045  |
| G8154       | -1.491404595 | 0.007957955 |
| FAM78A      | -1.491760167 | 0.004424423 |
| ADM         | -1.492910739 | 1.68297E-16 |
| AC245060.6  | -1.494611624 | 0.018444691 |
| LINC01273   | -1.497644402 | 0.001416476 |
| XLOC_002440 | -1.505309373 | 1.57251E-08 |
| MBP         | -1.505458259 | 5.74151E-08 |
| XLOC_009535 | -1.505853634 | 0.001279337 |
| AL844908.1  | -1.505897969 | 0.000691447 |
| FZD2        | -1.509760478 | 1.58234E-20 |
| SAMD13      | -1.516248283 | 0.027165317 |
| BX470102.1  | -1.518523626 | 4.92086E-06 |
| XLOC_006829 | -1.520318138 | 0.029131808 |
| G2112       | -1.521515185 | 0.020278972 |
| CYSRT1      | -1.524246503 | 1.58355E-05 |
| ARL4C       | -1.526176944 | 2.03756E-19 |
| GRTP1       | -1.530602874 | 3.21768E-05 |
| XLOC_000917 | -1.532865969 | 0.000896389 |
| AC144652.1  | -1.537161471 | 0.013974009 |
| CSRNP3      | -1.538540701 | 0.023605932 |
| RPS3AP24    | -1.545224473 | 0.032174214 |
| AL358176.4  | -1.546375001 | 0.002336734 |
| AL109924.2  | -1.547207783 | 0.000105107 |
| AL590428.1  | -1.549504265 | 0.000153285 |

|             |              |             |
|-------------|--------------|-------------|
| PLCE1-AS1   | -1.550928673 | 1.652E-11   |
| XLOC_003703 | -1.553081253 | 7.85523E-06 |
| AC027237.3  | -1.558084577 | 4.14648E-08 |
| AL353593.1  | -1.558883428 | 0.010053038 |
| RCOR2       | -1.564103113 | 0.043915812 |
| LMO7DN      | -1.56563152  | 1.68133E-05 |
| SPRY1       | -1.566251173 | 8.82345E-11 |
| AC021054.1  | -1.570313832 | 4.55442E-06 |
| OPRL1       | -1.584329298 | 8.43624E-06 |
| AC003986.2  | -1.585633031 | 0.000110619 |
| LINC01444   | -1.591080751 | 1.4327E-07  |
| AL132780.2  | -1.591132037 | 1.42834E-05 |
| G28383      | -1.594072824 | 9.7793E-05  |
| SIPA1L2     | -1.598197718 | 7.8722E-10  |
| KCNS1       | -1.598389131 | 0.004586579 |
| TMC3        | -1.618019003 | 0.010789275 |
| FRAT1       | -1.61879922  | 0.011439477 |
| AC138207.3  | -1.621957624 | 0.004033288 |
| LINC00327   | -1.624130515 | 2.58016E-14 |
| MPP7        | -1.626796107 | 3.18576E-12 |
| PDE7B       | -1.626801454 | 2.9705E-10  |
| AC009093.1  | -1.630538425 | 3.37264E-05 |
| RIPK4       | -1.630932476 | 5.8638E-05  |
| REERG       | -1.633485444 | 0.046034705 |
| FLNB-AS1    | -1.634832449 | 0.001926661 |
| AL109741.1  | -1.636706975 | 0.002337983 |
| STOX2       | -1.63816427  | 0.041956739 |
| SLC40A1     | -1.641847028 | 6.91607E-06 |
| CCDC102B    | -1.64594685  | 3.70586E-10 |
| AC007920.2  | -1.647696016 | 5.26248E-13 |
| TTC34       | -1.650472424 | 0.019924155 |
| DICER1-AS1  | -1.653837369 | 5.88957E-07 |
| FUT1        | -1.654335254 | 0.022667757 |
| GPFR1       | -1.65714707  | 4.174E-20   |
| SLC7A4      | -1.664735224 | 0.01705507  |
| RTN4RL1     | -1.666735084 | 0.013291181 |
| PRSS36      | -1.669974158 | 4.45754E-05 |
| MKX-AS1     | -1.672648862 | 2.40817E-12 |
| LURAP1L     | -1.672750513 | 6.09396E-30 |
| BRINP1      | -1.677183091 | 6.99717E-26 |
| AC078881.1  | -1.677768588 | 0.019807031 |
| LINC01443   | -1.682905536 | 0.005758342 |
| AP000911.1  | -1.684338462 | 0.002077454 |

|             |              |             |
|-------------|--------------|-------------|
| PAN3-AS1    | -1.6847473   | 0.002409611 |
| RGCC        | -1.686753305 | 8.086E-05   |
| FAXDC2      | -1.690560008 | 2.53492E-26 |
| AP006623.1  | -1.690986244 | 0.037372495 |
| FAM84B      | -1.697447168 | 9.45069E-05 |
| XLOC_007038 | -1.700684487 | 0.023886446 |
| ZNF385B     | -1.709701064 | 0.025509535 |
| ZNF608      | -1.713337164 | 2.42957E-05 |
| IRX6        | -1.717014901 | 0.043181435 |
| GAS6-AS1    | -1.725133982 | 0.017931757 |
| KRTAP1-1    | -1.730564957 | 3.0961E-06  |
| AC011369.2  | -1.743767188 | 0.015036448 |
| AC120036.4  | -1.746198127 | 3.18492E-06 |
| JAKMIP3     | -1.74665811  | 7.60885E-05 |
| EYA1        | -1.748882995 | 0.027362009 |
| KCNE3       | -1.749571839 | 0.000101768 |
| AC040160.1  | -1.752481711 | 2.10503E-05 |
| RTN4R       | -1.755364234 | 0.00048933  |
| NALT1       | -1.758796667 | 0.027394718 |
| LINC00857   | -1.759485838 | 5.76275E-08 |
| PNMA8B      | -1.76499889  | 0.003827091 |
| XLOC_003261 | -1.767231106 | 0.000396377 |
| AC018755.1  | -1.777920898 | 0.014593358 |
| EEPD1       | -1.781169605 | 1.10203E-12 |
| TSHR        | -1.786227935 | 0.000689719 |
| AC010997.3  | -1.791218088 | 0.006804196 |
| AC110048.2  | -1.791548733 | 0.004043537 |
| SH3RF2      | -1.793307494 | 1.30336E-06 |
| EXPH5       | -1.793404697 | 5.54155E-14 |
| PDK4        | -1.793844437 | 1.34115E-12 |
| AC005550.2  | -1.795790634 | 0.000189826 |
| TRPC6       | -1.796378301 | 7.59764E-10 |
| LINC01750   | -1.809459194 | 7.58052E-08 |
| NAPSA       | -1.81276325  | 0.001531978 |
| ZNF396      | -1.815101415 | 2.58242E-10 |
| TRIM55      | -1.826207737 | 0.007087627 |
| AL138689.2  | -1.830648932 | 0.041587793 |
| EVI2B       | -1.847125303 | 4.11815E-09 |
| KCNJ8       | -1.857484141 | 3.56412E-12 |
| DBP         | -1.869271391 | 1.16852E-16 |
| ANKFN1      | -1.874301854 | 0.001319422 |
| AL109924.4  | -1.878406583 | 0.046573446 |
| FBXL22      | -1.884397409 | 9.13868E-05 |

|             |              |             |
|-------------|--------------|-------------|
| AC090152.1  | -1.884493091 | 5.71298E-18 |
| AC117395.1  | -1.89773283  | 0.005497111 |
| XLOC_010311 | -1.901885094 | 2.8713E-08  |
| GAS1        | -1.910148582 | 1.1123E-27  |
| XLOC_001457 | -1.915781216 | 0.001012438 |
| ADH1B       | -1.922241573 | 0.002625983 |
| TOB1-AS1    | -1.92681378  | 0.0001969   |
| KLRG1       | -1.929078424 | 0.000296014 |
| XLOC_007920 | -1.937323581 | 0.004742653 |
| AC009093.2  | -1.943308068 | 1.25938E-06 |
| PIK3C2B     | -1.953239889 | 7.72456E-10 |
| CNKSR2      | -1.970492415 | 1.4748E-14  |
| AC069224.1  | -1.973256044 | 0.049094653 |
| ZNF233      | -1.990381231 | 9.12559E-07 |
| GSC         | -1.991824694 | 3.43682E-05 |
| SP9         | -1.999144757 | 9.28913E-05 |
| LINC02172   | -2.007830919 | 0.0030816   |
| YPEL4       | -2.011563136 | 0.000412343 |
| AC008708.2  | -2.039011998 | 5.32888E-09 |
| AC010359.1  | -2.047363773 | 0.000814818 |
| AL355596.1  | -2.075613467 | 0.000287942 |
| SMILR       | -2.087971148 | 3.68968E-15 |
| EVI2A       | -2.098648902 | 1.26992E-16 |
| XLOC_006390 | -2.100197489 | 1.83658E-06 |
| SIX2        | -2.110235649 | 0.004532586 |
| LINC00398   | -2.118392335 | 0.007844735 |
| AP001596.1  | -2.1214768   | 0.000137469 |
| TENT5B      | -2.12615059  | 1.61366E-06 |
| AC027808.2  | -2.14118382  | 0.002505471 |
| PRRT1       | -2.145006029 | 3.51084E-06 |
| ZSWIM2      | -2.145422287 | 0.001481182 |
| LINC01836   | -2.148525529 | 1.00108E-07 |
| MAP2K6      | -2.174568184 | 5.51368E-16 |
| KRTAP1-5    | -2.210495627 | 3.6577E-29  |
| LMO3        | -2.233045316 | 7.46013E-05 |
| PKD1L2      | -2.23927017  | 0.003762941 |
| Z99289.3    | -2.242589841 | 0.000597202 |
| INHA        | -2.248247253 | 2.21747E-06 |
| LINC00954   | -2.262919426 | 0.000265418 |
| AC124947.1  | -2.270682709 | 8.45552E-05 |
| AL513534.1  | -2.271011413 | 7.39714E-14 |
| XLOC_003463 | -2.30103428  | 0.011439477 |
| TOX         | -2.310244324 | 9.52266E-23 |

|              |              |             |
|--------------|--------------|-------------|
| AC022395.1   | -2.391897891 | 4.65052E-06 |
| AC116351.1   | -2.408181223 | 0.027073897 |
| APELA        | -2.411004331 | 4.70716E-07 |
| LINC02587    | -2.449977344 | 1.33448E-05 |
| PPIAP39      | -2.464545868 | 1.62363E-09 |
| XLOC_008955  | -2.496153972 | 5.04369E-14 |
| PPARGC1A     | -2.516750265 | 3.43067E-06 |
| FGF9         | -2.565233241 | 3.34861E-07 |
| C11orf87     | -2.567340875 | 7.02787E-26 |
| OSR1         | -2.601458138 | 6.34025E-23 |
| MSTN         | -2.608313892 | 5.60377E-07 |
| AC008705.1   | -2.667132363 | 0.000635744 |
| LUARIS       | -2.681604987 | 0.000506972 |
| BMP4         | -2.722998531 | 1.93844E-14 |
| CTB-178M22.2 | -2.755919325 | 1.53337E-07 |
| CYP39A1      | -2.757698204 | 2.97218E-07 |
| AC109779.1   | -2.760497508 | 4.25139E-13 |
| FILNC1       | -2.942359466 | 1.55485E-13 |
| NFE2         | -3.252764318 | 0.001389324 |
| GDF5         | -3.616668978 | 1.28459E-19 |
| G30615       | -3.639980837 | 5.59589E-05 |
| MC4R         | -3.831470184 | 4.47401E-17 |
| KIT          | -5.182154278 | 6.28255E-26 |



| Gene          | log2FC_Non.Damaged._IFNA | padj_Non.Damaged._IFNA | log2FC_Damaged._IFNA | padj_Damaged._IFNA | ES_Non.Damaged._Damaged._IFNA |
|---------------|--------------------------|------------------------|----------------------|--------------------|-------------------------------|
| AL356235.1    | -3.252784586             | 0.001808032            | 2.997573667          | 0.070192072        | 6.250358253                   |
| HIST1H2BF     | -3.879539696             | 0.03265849             | 0.616911346          | 1                  | 4.496451043                   |
| KCNC3         | -4.104026598             | 0.00168848             | 0.304173144          | 1                  | 4.408199742                   |
| HSD11B1       | 2.667288225              | 0.016913299            | 6.504779704          | 2.89126E-06        | 3.837491479                   |
| MCSR          | -3.741957199             | 0.002572382            | -0.108736753         | 0.977664147        | 3.633220446                   |
| FRMD7         | 1.841659082              | 0.506012021            | 5.41763982           | 0.011305089        | 3.575980739                   |
| DNAAF1        | 2.410420024              | 0.09561123             | 5.922981996          | 5.36397E-08        | 3.512561972                   |
| IFNB1         | 2.675924633              | 0.594964589            | 6.151725631          | 1.17146E-05        | 3.475800998                   |
| AC112128.1    | -3.632502668             | 0.021295641            | -0.207369346         | 0.932561265        | 3.425133322                   |
| SLC38A3       | -4.113524806             | 0.006103354            | -0.794184116         | 0.777773973        | 3.31934069                    |
| AC008074.2    | 0.16735707               | 0.93482762             | 3.398556497          | 0.003300616        | 3.231199427                   |
| LRRC37A7P     | -3.218216023             | 0.010412766            | -0.007517731         | 1                  | 3.210698292                   |
| ARAP2         | 1.183948736              | 0.070618399            | 4.359090144          | 7.71796E-06        | 3.175141407                   |
| AL592424.1    | -4.308249068             | 0.018926016            | -1.152088641         | 1                  | 3.156160426                   |
| BCL2A1        | 5.864785934              | 1.01265E-07            | 8.95722323           | 2.12164E-10        | 3.092437296                   |
| XLOC_002041   | 0.792353886              | 0.693348162            | 3.874878031          | 0.049041492        | 3.082524144                   |
| PLEKHG6       | 1.203422663              | 0.575704453            | 4.260828573          | 0.022113953        | 3.05740591                    |
| CYP27B1       | 2.705859086              | 6.26016E-05            | 5.736384569          | 1.40119E-09        | 3.030525484                   |
| ZNF366        | 2.058329682              | 1                      | 5.039028221          | 0.024345777        | 2.980698539                   |
| HNF1B         | 1.976503371              | 0.101498132            | 4.934858398          | 0.001579226        | 2.958355028                   |
| XLOC_005458   | -3.470683964             | 0.044223482            | -0.513416358         | 0.887511219        | 2.957267606                   |
| NT5CP1        | 0.849671465              | 0.382965969            | 3.789464019          | 0.00506264         | 2.939792555                   |
| AC092296.2    | -4.516170659             | 0.000453877            | -1.615738609         | 0.521457435        | 2.900432051                   |
| SERPINB4      | 2.554000394              | 0.025177794            | 5.450816212          | 0.035204432        | 2.896815818                   |
| PTGER4        | 0.025212706              | 0.985759756            | 2.916628669          | 0.004434244        | 2.891415963                   |
| BMP3          | 0.291286494              | 0.870908801            | 3.122170915          | 0.043464471        | 2.830884421                   |
| AC069224.1    | 0.474650225              | 0.881568246            | 3.263065123          | 0.045829551        | 2.788414898                   |
| ENPEP         | 0.836433159              | 0.259312807            | 3.607287365          | 8.05871E-05        | 2.770854206                   |
| IRF8          | 2.716097719              | 0.587423133            | 5.450134473          | 4.52606E-06        | 2.734036754                   |
| AC020915.1    | -3.821685072             | 0.003117886            | -1.104070722         | 0.534382985        | 2.71761435                    |
| DHCR24-DT     | -4.189127372             | 0.022541381            | -1.471732336         | 1                  | 2.717395036                   |
| XLOC_004201   | 1.926159242              | 1                      | 4.59875979           | 0.004327602        | 2.672600549                   |
| C6orf163      | -1.364275236             | 0.044037021            | 1.243289318          | 0.202062486        | 2.607564554                   |
| NIP7P3        | -3.380926143             | 0.043994559            | -0.786220928         | 1                  | 2.594705216                   |
| AL022345.4    | 0.207586091              | 0.921740217            | 2.80129267           | 0.027110752        | 2.593706579                   |
| CXCL5         | 5.002820266              | 1.45869E-11            | 7.595621908          | 5.02138E-09        | 2.592801642                   |
| RP11-380M21.4 | -2.369411194             | 0.042975321            | 0.206481232          | 1                  | 2.575892426                   |

|            |              |             |              |             |             |
|------------|--------------|-------------|--------------|-------------|-------------|
| PWAR6      | -3.822487409 | 1.63007E-05 | -1.277333395 | 0.341050357 | 2.545154014 |
| ZNF474     | -2.040563606 | 0.025350595 | 0.5033644    | 0.634320329 | 2.543928006 |
| FER1L5     | -2.298658581 | 0.008934604 | 0.244641714  | 0.893935621 | 2.543300296 |
| RPA4       | 0.627170147  | 0.55978711  | 3.167157477  | 0.00104072  | 2.53998733  |
| HLA-V      | 1.893737568  | 0.026733514 | 4.425774287  | 0.000615457 | 2.53203672  |
| AC010168.2 | 0.140837366  | 0.916477975 | 2.668064635  | 1.0575E-06  | 2.52722727  |
| AL161891.1 | -2.693660468 | 0.013980711 | -0.171352735 | 0.946490198 | 2.522307734 |
| PCA3       | -4.380376657 | 0.004601009 | -1.858397084 | 0.298550509 | 2.521979574 |
| PRKCQ      | 2.393317097  | 0.551422233 | 4.904215455  | 0.038974304 | 2.510898358 |
| CXCL6      | 4.344253333  | 1.67704E-11 | 6.852754334  | 5.62202E-10 | 2.508501    |
| AC092919.2 | -3.833529593 | 0.03061351  | -1.334063917 | 0.368776489 | 2.499465676 |
| AC005899.8 | 2.004171564  | 0.047811321 | 4.471906154  | 0.003792882 | 2.467734591 |
| AC083837.1 | 6.287528902  | 3.94639E-18 | 8.738783533  | 9.36288E-11 | 2.451254631 |
| CD69       | 6.50905389   | 0.001050035 | 8.935467487  | 5.69158E-24 | 2.426413597 |
| AL683813.1 | -2.897737697 | 0.028317948 | -0.473600632 | 0.854402805 | 2.424137065 |
| RASGEF1B   | 3.675914607  | 2.23589E-06 | 6.090363611  | 3.96292E-11 | 2.414449004 |
| AL137186.1 | 2.017669563  | 0.36468201  | 4.421241343  | 0.005108376 | 2.40357178  |
| TTC4P1     | 2.342250379  | 0.02764942  | 4.74351205   | 0.002136323 | 2.401261672 |
| LYZ        | -2.738113646 | 0.042883347 | -0.344366851 | 0.895324696 | 2.393746795 |
| AL356234.3 | 4.482086879  | 4.01293E-06 | 6.857959946  | 8.77098E-11 | 2.375873067 |
| AP001596.1 | -3.88451995  | 0.000377701 | -1.541624054 | 0.154754645 | 2.342895896 |
| AC022816.1 | 4.194360229  | 0.000229451 | 6.517222807  | 2.95708E-05 | 2.322862578 |
| IFI30      | 5.525938332  | 1.59071E-14 | 7.840767211  | 1.12449E-14 | 2.314828879 |
| AC073862.4 | 2.941635934  | 0.127631304 | 5.256076532  | 0.000295869 | 2.314440598 |
| XIRP1      | 6.071039823  | 4.56537E-11 | 8.376890602  | 6.41647E-08 | 2.305850779 |
| C19orf38   | 0.71845491   | 0.448056057 | 3.024120231  | 0.02222518  | 2.305665321 |
| AC004988.1 | 3.7649853    | 1.24512E-07 | 6.025225595  | 2.70831E-07 | 2.260240296 |
| CFAP161    | 1.54886102   | 0.042283448 | 3.799499761  | 0.001175729 | 2.250638742 |
| FRRS1      | 2.056901819  | 0.022017285 | 4.292938516  | 0.002611256 | 2.236036697 |
| AC131649.2 | 2.279147603  | 0.22743498  | 4.507863003  | 0.012022724 | 2.228715399 |
| AC067838.1 | -2.629127298 | 0.00218226  | -0.406480145 | 0.661791496 | 2.222647153 |
| CCDC162P   | 1.233583381  | 0.104600197 | 3.440785912  | 0.020349244 | 2.207202531 |

|             |              |             |              |             |             |
|-------------|--------------|-------------|--------------|-------------|-------------|
| HIPK1-AS1   | -2.701725386 | 0.006314184 | -0.517348582 | 0.889303512 | 2.184376804 |
| NR4A3       | 3.165645271  | 3.20016E-09 | 5.343820213  | 2.12895E-23 | 2.178174943 |
| P2RY1       | 3.605897846  | 0.00012682  | 5.781544058  | 0.000106227 | 2.175646212 |
| G7822       | -2.905402123 | 0.011407177 | -0.730913262 | 0.703784278 | 2.174488861 |
| XLOC_011313 | -2.350770616 | 0.00084852  | -0.204483144 | 0.893514283 | 2.146287472 |
| EGFLAM      | 0.575599814  | 0.461366981 | 2.72168513   | 0.001909232 | 2.146085316 |
| AL132780.4  | -2.520220404 | 0.000256715 | -0.376224904 | 1           | 2.143995501 |
| IBSP        | 2.808392967  | 0.005889724 | 4.949976445  | 0.002604198 | 2.141583479 |
| CSF2        | 4.648181362  | 2.00459E-06 | 6.788580082  | 8.64702E-10 | 2.14039872  |
| AC008147.2  | 0.135669625  | 0.91634768  | 2.253320665  | 0.000441731 | 2.11765104  |
| STARD8      | -0.12840416  | 0.920612569 | 1.98030379   | 0.000697554 | 2.10870795  |
| CD79A       | 1.056701304  | 0.571715473 | 3.163116985  | 0.038172035 | 2.10641568  |
| HEATR9      | 3.94630816   | 0.041746489 | 6.051541624  | 1.33093E-05 | 2.105233464 |
| AL137009.1  | 0.939399816  | 0.637513269 | 3.024017272  | 0.011517537 | 2.084617456 |
| COL4A3      | -2.099597207 | 0.03821952  | -0.016457893 | 0.993730228 | 2.083139314 |
| PPARGC1A    | -4.391824778 | 3.78936E-05 | -2.331422362 | 0.033021098 | 2.060402415 |
| AC099489.1  | 4.009747474  | 4.73628E-07 | 6.070084092  | 4.54528E-15 | 2.060336618 |
| HCK         | 3.145264043  | 5.11152E-05 | 5.204802791  | 0.000223326 | 2.059538747 |
| FAM107A     | 7.600952027  | 7.48589E-23 | 9.659334098  | 3.48654E-13 | 2.058382071 |
| B3GNT5      | 1.033491403  | 0.212131262 | 3.082970439  | 0.005187705 | 2.049479036 |
| AD000864.1  | 0.194057221  | 0.869530723 | 2.232129863  | 0.015959811 | 2.038072642 |
| CP          | 1.348268782  | 0.282650577 | 3.38443452   | 9.59452E-05 | 2.036165738 |
| TP63        | 3.148654041  | 4.83422E-05 | 5.183223378  | 3.98219E-08 | 2.034569337 |
| KBTBD11     | -0.948523472 | 0.174624816 | 1.071443523  | 0.00792838  | 2.019966995 |
| KRT18P63    | -3.313029082 | 0.049947387 | -1.294722671 | 1           | 2.018306411 |
| LINC02392   | 4.181212077  | 0.022626066 | 6.1941042    | 8.24737E-05 | 2.012892122 |
| ADD2        | 0.978611101  | 0.154527309 | 2.987839994  | 0.00381357  | 2.009228893 |
| MEOX1       | 4.444867378  | 4.13659E-08 | 6.452881268  | 3.43543E-16 | 2.00801389  |
| AC010524.1  | 0.245084675  | 1           | 2.25144637   | 0.045399678 | 2.006361695 |
| AC108673.2  | 1.053226506  | 0.366430596 | 3.054276152  | 0.010143353 | 2.001049646 |
| AC016590.3  | -2.802614243 | 0.016567086 | -0.808637361 | 1           | 1.993976883 |
| BANF1P1     | 1.107813711  | 0.250047119 | 3.101650972  | 0.018563449 | 1.993837262 |

|             |              |             |              |             |             |
|-------------|--------------|-------------|--------------|-------------|-------------|
| SLC12A1     | 2.539106741  | 0.09565917  | 4.52387191   | 0.001124535 | 1.984765169 |
| RP11-87H9.3 | -2.322856648 | 0.031950678 | -0.342326369 | 1           | 1.979620279 |
| AL590648.3  | 3.904897541  | 0.000325417 | 5.855178729  | 0.000243897 | 1.950281188 |
| DNER        | 4.97173059   | 4.93772E-06 | 6.918612749  | 9.27863E-09 | 1.946882159 |
| FTLP15      | 1.584398643  | 0.243552879 | 3.528286056  | 0.011827968 | 1.943887412 |
| DUSP8       | -3.152274691 | 0.026663093 | -1.211445333 | 0.680111958 | 1.940829358 |
| FBXL22      | -3.31041336  | 0.001319133 | -1.391585025 | 0.254575447 | 1.918828335 |
| AL136382.1  | 1.041987787  | 0.384762448 | 2.957777299  | 0.021729368 | 1.915789512 |
| RHBDL3      | 2.251145593  | 0.121115516 | 4.165611742  | 0.016781181 | 1.914466149 |
| RRAD        | 1.165906123  | 0.0076278   | 3.071282028  | 6.73057E-05 | 1.905375906 |
| LGI4        | 3.245380334  | 1.27138E-06 | 5.147266019  | 4.66438E-11 | 1.901885685 |
| AC103923.1  | 0.559296265  | 0.660022364 | 2.458329387  | 0.02922274  | 1.899033121 |
| SHISA9      | -1.525140211 | 0.007360317 | 0.37210946   | 0.808923183 | 1.897249671 |
| RNU6-26P    | -1.920829768 | 0.003707789 | -0.046891208 | 0.981866698 | 1.87393856  |
| RBPM52      | -2.500139709 | 0.001220924 | -0.638953002 | 0.125302055 | 1.861186706 |
| TRHDE-AS1   | -2.072305913 | 0.036135509 | -0.212708238 | 0.886374841 | 1.859597675 |
| LINC00865   | -2.28417729  | 0.049024051 | -0.431273709 | 0.772585337 | 1.852903582 |
| KIAA1671    | 3.412496129  | 2.55275E-05 | 5.258780808  | 1.30814E-11 | 1.846284679 |
| CCL4L1      | 2.92447228   | 0.550349772 | 4.767574633  | 0.024395822 | 1.843102353 |
| DCLK3       | 2.662277858  | 0.041830414 | 4.500756825  | 0.011795673 | 1.838478968 |
| PTPRB       | -2.150399634 | 0.000204861 | -0.321422536 | 0.723494516 | 1.828977098 |
| PROX1       | 2.287598856  | 0.000307555 | 4.113537799  | 2.9222E-05  | 1.825938943 |
| EXOC3L4     | 3.762627567  | 0.000951301 | 5.582790231  | 3.41597E-10 | 1.820162663 |
| XLOC_012442 | 3.268435978  | 0.005950534 | 5.084103947  | 0.001116261 | 1.815667969 |
| FZD5        | 0.677371674  | 0.440705216 | 2.485069316  | 0.000161626 | 1.807697643 |
| LINC01140   | 2.125034786  | 0.000508203 | 3.912294066  | 7.59628E-07 | 1.78725928  |
| TNFSF18     | 2.884167721  | 9.78008E-05 | 4.649865655  | 1.89904E-07 | 1.765697934 |
| AC116003.1  | -2.797583966 | 0.024398849 | -1.036421058 | 1           | 1.761162908 |
| CREB5       | -1.910495296 | 7.60617E-05 | -0.157117002 | 0.825098071 | 1.753378294 |
| AL592429.1  | 4.193251277  | 1.50142E-05 | 5.942358598  | 1.30508E-06 | 1.749107321 |
| AC004917.1  | 0.126927143  | 0.934666646 | 1.853721765  | 0.03133383  | 1.726794622 |
| BAK1P1      | 0.857877455  | 0.440366805 | 2.579660637  | 0.00247165  | 1.721783182 |

|            |              |             |              |             |             |
|------------|--------------|-------------|--------------|-------------|-------------|
| CCNA1      | 3.800746508  | 0.045012799 | 5.519902174  | 0.032810742 | 1.719155665 |
| LIF        | 3.970241249  | 7.65441E-05 | 5.689335524  | 4.88457E-09 | 1.719094275 |
| SLC14A1    | -1.901673581 | 0.002775307 | -0.204695363 | 0.820577052 | 1.696978218 |
| MAP3K12    | -1.782102324 | 0.003760098 | -0.094654991 | 0.90347525  | 1.687447334 |
| LEP        | -2.043295732 | 0.005834531 | -0.358336652 | 0.595275724 | 1.684959081 |
| AC005703.6 | 1.147290122  | 0.122291806 | 2.829792127  | 0.000875643 | 1.682502005 |
| AC006160.1 | 1.6383527    | 0.252671849 | 3.318347675  | 0.021182644 | 1.679994975 |
| AC073548.1 | 1.745540134  | 0.043880999 | 3.421787159  | 0.013805658 | 1.676247025 |
| NEFM       | -1.632782129 | 0.002026261 | 0.037192549  | 0.967301166 | 1.669974678 |
| AL035071.2 | -2.52411758  | 0.045693778 | -0.858364309 | 1           | 1.665753271 |
| SAA2       | 5.590723123  | 1.50744E-35 | 7.254101745  | 2.39038E-52 | 1.663378621 |
| TFAP2A-AS2 | -1.098761806 | 0.008837646 | 0.53529416   | 0.610431071 | 1.634055966 |
| SLAMF8     | 6.273937072  | 1.78641E-34 | 7.907255398  | 6.96337E-25 | 1.633318326 |
| RUNDC3B    | -1.886371677 | 0.03652963  | -0.270134437 | 0.811567111 | 1.61623724  |
| LTB        | 1.724531409  | 0.227630061 | 3.331628834  | 0.002112713 | 1.607097425 |
| AP000924.1 | 2.967024578  | 0.392177266 | 4.571802058  | 0.009455051 | 1.604777481 |
| NEFL       | -1.49438483  | 0.008785537 | 0.107503916  | 0.833539586 | 1.601888746 |
| SAA1       | 3.119352879  | 2.13483E-18 | 4.717681857  | 7.41678E-20 | 1.598328978 |
| CARD10     | -2.315305988 | 0.006948581 | -0.717045136 | 0.33937623  | 1.598260852 |
| CAMK2B     | -2.148968425 | 0.021295641 | -0.554315559 | 0.693079249 | 1.594652866 |
| NPL        | 0.387394824  | 0.288144599 | 1.975071357  | 0.013191554 | 1.587676533 |
| PPP1R2P1   | 2.318728707  | 0.035214813 | 3.856745795  | 0.009732336 | 1.538017087 |
| SP140      | 3.307113723  | 0.000304389 | 4.843436234  | 0.004676363 | 1.536322512 |
| AL021707.7 | 2.726891828  | 0.001218721 | 4.259736599  | 0.000125358 | 1.532844771 |
| PAX5       | 5.526369263  | 9.53396E-14 | 7.058639285  | 1.47911E-12 | 1.532270022 |
| PCSK9      | -2.382464671 | 0.002671259 | -0.855653161 | 0.559264521 | 1.52681151  |
| AC011498.7 | -1.977830203 | 0.017884358 | -0.468807045 | 1           | 1.509023159 |
| ZNF205     | -1.885692588 | 0.012037413 | -0.379888348 | 0.846000048 | 1.505804241 |

|                    | skin_biopsy_nonlesional | loisy_nonlesionpsy | nonlesio_lesional | log2opsy_lesional | skin_biopsy_lesional | padj     |
|--------------------|-------------------------|--------------------|-------------------|-------------------|----------------------|----------|
| <b>XLOC_010133</b> | NA                      | NA                 | NA                | -20.15            | 3.08E-10             | 7.55E-06 |
| <b>IGKJ1</b>       | 0.48                    | 8.19E-01           | 1.00E+00          | 5.23              | 3.74E-08             | 3.19E-04 |
| <b>CYP1A2</b>      | -0.62                   | 5.36E-01           | 1.00E+00          | -7.15             | 3.91E-08             | 3.19E-04 |
| <b>IGKC</b>        | 4.31                    | 4.14E-11           | 2.61E-08          | 5.03              | 5.67E-08             | 3.47E-04 |
| <b>CHRD12</b>      | -4.31                   | 1.63E-02           | 8.04E-01          | 4.80              | 1.25E-07             | 6.15E-04 |
| <b>IGLV3-25</b>    | 5.01                    | 1.31E-01           | 1.00E+00          | 6.44              | 1.69E-07             | 6.50E-04 |
| <b>LINC00668</b>   | -1.37                   | 3.89E-01           | 1.00E+00          | -5.33             | 1.86E-07             | 6.50E-04 |
| <b>IGHV4-4</b>     | 1.74                    | 6.05E-01           | 1.00E+00          | 7.00              | 2.18E-07             | 6.50E-04 |
| <b>IGHV4-34</b>    | -2.12                   | 4.29E-01           | 1.00E+00          | 6.22              | 2.39E-07             | 6.50E-04 |
| <b>IGHA2</b>       | 8.73                    | 1.29E-26           | 3.92E-22          | 4.71              | 2.66E-07             | 6.51E-04 |
| <b>MMP3</b>        | -1.56                   | 1.61E-01           | 1.00E+00          | 5.20              | 3.00E-07             | 6.67E-04 |
| <b>G30725</b>      | -0.14                   | 8.94E-01           | 1.00E+00          | -5.66             | 3.92E-07             | 8.00E-04 |
| <b>SFRP2</b>       | 0.74                    | 2.19E-01           | 1.00E+00          | 2.26              | 1.18E-06             | 2.23E-03 |
| <b>IGLV2-23</b>    | 4.30                    | 5.69E-02           | 1.00E+00          | 5.99              | 1.53E-06             | 2.68E-03 |
| <b>IGHA1</b>       | 4.85                    | 4.91E-10           | 2.80E-07          | 4.33              | 1.69E-06             | 2.76E-03 |
| <b>CCL18</b>       | 0.82                    | 3.70E-01           | 1.00E+00          | 3.49              | 1.88E-06             | 2.88E-03 |
| <b>CACNA1G-AS1</b> | -0.45                   | 6.94E-01           | 1.00E+00          | 4.91              | 3.35E-06             | 4.84E-03 |
| <b>HMGA2</b>       | -0.43                   | 7.90E-01           | 1.00E+00          | 4.09              | 4.09E-06             | 5.57E-03 |
| <b>PLS3-AS1</b>    | 1.29                    | 6.05E-02           | 1.00E+00          | -3.53             | 5.12E-06             | 6.55E-03 |
| <b>HIST1H1E</b>    | -0.61                   | 3.17E-01           | 1.00E+00          | -3.05             | 5.34E-06             | 6.55E-03 |
| <b>IGHG2</b>       | 4.13                    | 1.17E-02           | 6.70E-01          | 5.27              | 5.76E-06             | 6.72E-03 |
| <b>SNORD3B-2</b>   | -1.05                   | 3.30E-01           | 1.00E+00          | -4.31             | 6.14E-06             | 6.84E-03 |
| <b>IGHV3-23</b>    | 3.51                    | 1.10E-02           | 6.46E-01          | 4.67              | 7.62E-06             | 8.11E-03 |
| <b>RNASEH2A</b>    | -2.38                   | 2.23E-01           | 1.00E+00          | -3.92             | 8.19E-06             | 8.36E-03 |
| <b>IGLV1-51</b>    | 2.68                    | 9.79E-03           | 6.13E-01          | 4.17              | 9.59E-06             | 9.22E-03 |
| <b>HTR3A</b>       | 0.31                    | 7.78E-01           | 1.00E+00          | 4.49              | 1.00E-05             | 9.22E-03 |
| <b>ARL14</b>       | -4.52                   | 9.91E-02           | 1.00E+00          | 4.64              | 1.02E-05             | 9.22E-03 |
| <b>GLMP</b>        | 0.12                    | 4.76E-01           | 1.00E+00          | 0.90              | 1.62E-05             | 1.38E-02 |
| <b>C1QTNF6</b>     | -0.77                   | 2.75E-01           | 1.00E+00          | 2.71              | 1.63E-05             | 1.38E-02 |
| <b>RAP2B</b>       | -0.23                   | 3.68E-01           | 1.00E+00          | 0.85              | 1.78E-05             | 1.45E-02 |
| <b>RPS19P7</b>     | 0.66                    | 8.49E-01           | 1.00E+00          | -4.07             | 1.93E-05             | 1.52E-02 |

|                   |       |          |          |       |          |          |
|-------------------|-------|----------|----------|-------|----------|----------|
| <b>GTF2IP1</b>    | -0.10 | 6.81E-01 | 1.00E+00 | -1.03 | 2.05E-05 | 1.57E-02 |
| <b>CBLN1</b>      | -0.93 | 5.69E-01 | 1.00E+00 | -4.91 | 2.43E-05 | 1.81E-02 |
| <b>INHBA</b>      | 0.11  | 8.60E-01 | 1.00E+00 | 2.13  | 2.58E-05 | 1.86E-02 |
| <b>IGLV2-8</b>    | 6.14  | 1.94E-03 | 2.39E-01 | 5.49  | 3.32E-05 | 2.32E-02 |
| <b>RAC1P2</b>     | -0.26 | 5.43E-01 | 1.00E+00 | -2.18 | 3.60E-05 | 2.41E-02 |
| <b>IGKV3D-20</b>  | 3.70  | 1.05E-02 | 6.33E-01 | 5.05  | 3.69E-05 | 2.41E-02 |
| <b>PRSS27</b>     | -0.80 | 7.81E-02 | 1.00E+00 | 2.74  | 3.74E-05 | 2.41E-02 |
| <b>MZB1</b>       | 4.49  | 9.95E-04 | 1.63E-01 | 3.61  | 3.97E-05 | 2.46E-02 |
| <b>OOEP</b>       | 1.20  | 3.00E-01 | 1.00E+00 | -4.89 | 4.02E-05 | 2.46E-02 |
| <b>IGKV3-20</b>   | 6.32  | 3.38E-08 | 1.48E-05 | 4.57  | 4.11E-05 | 2.46E-02 |
| <b>MTRNR2L8</b>   | -2.71 | 3.15E-02 | 1.00E+00 | -2.28 | 4.84E-05 | 2.82E-02 |
| <b>COL5A1</b>     | -0.55 | 3.78E-01 | 1.00E+00 | 3.09  | 5.37E-05 | 3.06E-02 |
| <b>FKBP11</b>     | -0.24 | 4.73E-01 | 1.00E+00 | 0.89  | 6.17E-05 | 3.44E-02 |
| <b>IGKV2-30</b>   | 5.77  | 9.10E-04 | 1.54E-01 | 4.72  | 6.53E-05 | 3.53E-02 |
| <b>STMN2</b>      | -0.46 | 4.46E-01 | 1.00E+00 | 2.41  | 6.62E-05 | 3.53E-02 |
| <b>LINC02223</b>  | 0.51  | 5.97E-01 | 1.00E+00 | 3.38  | 7.12E-05 | 3.71E-02 |
| <b>IGKV3D-15</b>  | 4.19  | 1.88E-03 | 2.39E-01 | 5.29  | 8.12E-05 | 4.06E-02 |
| <b>AC006372.2</b> | -0.77 | 7.96E-01 | 1.00E+00 | 5.12  | 8.13E-05 | 4.06E-02 |
| <b>IGKV1D-39</b>  | 0.63  | 7.94E-01 | 1.00E+00 | 4.68  | 8.32E-05 | 4.08E-02 |
| <b>MT-RNR2</b>    | 0.09  | 8.44E-01 | 1.00E+00 | -1.76 | 8.56E-05 | 4.11E-02 |
| <b>MZT2B</b>      | -0.06 | 8.47E-01 | 1.00E+00 | -1.96 | 9.38E-05 | 4.42E-02 |
| <b>G826</b>       | 0.14  | 9.27E-01 | 1.00E+00 | -2.35 | 9.88E-05 | 4.57E-02 |
| <b>AL078595.1</b> | NA    | NA       | NA       | -4.86 | 1.02E-04 | 4.61E-02 |
| <b>GUF1</b>       | -0.02 | 9.11E-01 | 1.00E+00 | -0.61 | 1.03E-04 | 4.61E-02 |
| <b>MMP14</b>      | -0.22 | 4.21E-01 | 1.00E+00 | 3.41  | 1.06E-04 | 4.61E-02 |
| <b>COL1A1</b>     | 0.51  | 6.23E-01 | 1.00E+00 | 2.62  | 1.07E-04 | 4.61E-02 |
| <b>LINC01705</b>  | NA    | NA       | NA       | 4.67  | 1.13E-04 | 4.64E-02 |
| <b>CD37</b>       | -0.19 | 6.13E-01 | 1.00E+00 | 2.33  | 1.13E-04 | 4.64E-02 |
| <b>PTPN20B</b>    | -0.72 | 3.90E-01 | 1.00E+00 | -2.22 | 1.14E-04 | 4.64E-02 |
| <b>RPL3L</b>      | -0.49 | 5.38E-01 | 1.00E+00 | -3.01 | 1.16E-04 | 4.64E-02 |
| <b>SLC16A3</b>    | -0.39 | 2.76E-01 | 1.00E+00 | 3.38  | 1.19E-04 | 4.65E-02 |
| <b>CRNDE</b>      | -0.20 | 4.69E-01 | 1.00E+00 | -1.39 | 1.20E-04 | 4.65E-02 |

|                    |       |          |          |       |          |          |
|--------------------|-------|----------|----------|-------|----------|----------|
| <b>AL033527.5</b>  | -0.91 | 4.73E-01 | 1.00E+00 | -4.91 | 1.24E-04 | 4.65E-02 |
| <b>EPGN</b>        | -1.76 | 6.30E-02 | 1.00E+00 | 3.40  | 1.28E-04 | 4.65E-02 |
| <b>PTHLH</b>       | 0.02  | 9.80E-01 | 1.00E+00 | 2.35  | 1.28E-04 | 4.65E-02 |
| <b>IGHV4-28</b>    | 0.56  | 8.71E-01 | 1.00E+00 | 6.60  | 1.29E-04 | 4.65E-02 |
| <b>IGHJ6</b>       | 1.29  | 7.08E-01 | 1.00E+00 | 5.74  | 1.29E-04 | 4.65E-02 |
| <b>COL5A2</b>      | -0.24 | 6.92E-01 | 1.00E+00 | 2.63  | 1.47E-04 | 5.07E-02 |
| <b>CXCL1</b>       | -1.25 | 1.18E-01 | 1.00E+00 | 3.16  | 1.48E-04 | 5.07E-02 |
| <b>EVI2B</b>       | -0.15 | 7.24E-01 | 1.00E+00 | 1.59  | 1.50E-04 | 5.07E-02 |
| <b>MTND2P28</b>    | 0.33  | 6.21E-01 | 1.00E+00 | -2.76 | 1.52E-04 | 5.07E-02 |
| <b>MDK</b>         | 0.11  | 8.37E-01 | 1.00E+00 | 1.71  | 1.52E-04 | 5.07E-02 |
| <b>AC091488.1</b>  | 1.73  | 4.46E-01 | 1.00E+00 | -5.33 | 1.53E-04 | 5.07E-02 |
| <b>CCL4L1</b>      | -3.00 | 3.02E-01 | 1.00E+00 | 5.17  | 1.58E-04 | 5.17E-02 |
| <b>SIGLEC10</b>    | -0.54 | 3.43E-01 | 1.00E+00 | 2.95  | 1.71E-04 | 5.38E-02 |
| <b>LGALS2</b>      | 0.48  | 3.49E-01 | 1.00E+00 | 2.27  | 1.72E-04 | 5.38E-02 |
| <b>SLC7A8</b>      | -0.01 | 9.75E-01 | 1.00E+00 | 1.16  | 1.74E-04 | 5.38E-02 |
| <b>MTRNR2L10</b>   | 2.28  | 5.03E-01 | 1.00E+00 | -4.26 | 1.77E-04 | 5.38E-02 |
| <b>NCF1C</b>       | -0.19 | 8.12E-01 | 1.00E+00 | 3.48  | 1.79E-04 | 5.38E-02 |
| <b>XLOC_010219</b> | -1.39 | 6.89E-01 | 1.00E+00 | -3.35 | 1.82E-04 | 5.38E-02 |
| <b>PPP1R14D</b>    | -1.29 | 3.72E-01 | 1.00E+00 | -3.87 | 1.82E-04 | 5.38E-02 |
| <b>RETN</b>        | -2.24 | 2.01E-01 | 1.00E+00 | 3.99  | 1.83E-04 | 5.38E-02 |
| <b>ISG15</b>       | -0.14 | 8.99E-01 | 1.00E+00 | 2.77  | 1.85E-04 | 5.38E-02 |
| <b>FNDC1</b>       | -0.84 | 5.66E-02 | 1.00E+00 | 2.76  | 1.89E-04 | 5.40E-02 |
| <b>NDP</b>         | -0.66 | 4.42E-01 | 1.00E+00 | 2.48  | 1.90E-04 | 5.40E-02 |
| <b>XLOC_000595</b> | -0.91 | 3.06E-01 | 1.00E+00 | -4.05 | 1.95E-04 | 5.49E-02 |
| <b>FKBP1B</b>      | -0.42 | 5.66E-01 | 1.00E+00 | -2.71 | 2.03E-04 | 5.61E-02 |
| <b>TREM1</b>       | 0.14  | 8.73E-01 | 1.00E+00 | 3.70  | 2.04E-04 | 5.61E-02 |
| <b>TNFRSF12A</b>   | -0.76 | 1.05E-01 | 1.00E+00 | 1.25  | 2.08E-04 | 5.66E-02 |
| <b>AC006994.2</b>  | -0.06 | 9.48E-01 | 1.00E+00 | -4.15 | 2.13E-04 | 5.66E-02 |
| <b>FHL2</b>        | -0.04 | 8.37E-01 | 1.00E+00 | 0.66  | 2.14E-04 | 5.66E-02 |
| <b>AC108449.2</b>  | -0.24 | 6.88E-01 | 1.00E+00 | -2.03 | 2.17E-04 | 5.66E-02 |
| <b>GPR15</b>       | 2.52  | 2.90E-01 | 1.00E+00 | 5.26  | 2.17E-04 | 5.66E-02 |
| <b>AC126768.2</b>  | -0.38 | 6.69E-01 | 1.00E+00 | -1.43 | 2.23E-04 | 5.76E-02 |



|                    |       |          |          |       |          |          |
|--------------------|-------|----------|----------|-------|----------|----------|
| <b>AC007608.3</b>  | -2.58 | 7.34E-02 | 1.00E+00 | 2.44  | 2.31E-04 | 5.88E-02 |
| <b>LCE3A</b>       | 0.61  | 6.92E-01 | 1.00E+00 | 4.33  | 2.35E-04 | 5.95E-02 |
| <b>AL132780.4</b>  | -4.16 | 2.76E-03 | 2.72E-01 | -4.75 | 2.49E-04 | 6.23E-02 |
| <b>AP002748.3</b>  | -0.02 | 9.58E-01 | 1.00E+00 | -1.44 | 2.58E-04 | 6.33E-02 |
| <b>FCRL5</b>       | 2.76  | 1.21E-01 | 1.00E+00 | 5.04  | 2.59E-04 | 6.33E-02 |
| <b>AC093510.1</b>  | 0.02  | 9.90E-01 | 1.00E+00 | -4.10 | 2.63E-04 | 6.33E-02 |
| <b>AL355338.1</b>  | -0.31 | 3.81E-01 | 1.00E+00 | -1.05 | 2.63E-04 | 6.33E-02 |
| <b>SETD9</b>       | 0.09  | 8.24E-01 | 1.00E+00 | -1.07 | 2.72E-04 | 6.46E-02 |
| <b>AC007038.1</b>  | 1.38  | 5.23E-01 | 1.00E+00 | -3.99 | 2.81E-04 | 6.61E-02 |
| <b>AC009949.1</b>  | -3.06 | 2.54E-01 | 1.00E+00 | 4.56  | 2.91E-04 | 6.73E-02 |
| <b>LCE3E</b>       | -0.80 | 1.97E-01 | 1.00E+00 | 2.72  | 2.91E-04 | 6.73E-02 |
| <b>KRT16</b>       | -1.18 | 4.34E-03 | 3.73E-01 | 3.36  | 2.95E-04 | 6.75E-02 |
| <b>AC011451.3</b>  | 0.03  | 9.91E-01 | 1.00E+00 | -5.08 | 2.98E-04 | 6.75E-02 |
| <b>IGLC2</b>       | 5.35  | 3.39E-13 | 2.50E-10 | 3.97  | 3.06E-04 | 6.88E-02 |
| <b>AC008691.1</b>  | 0.37  | 7.97E-01 | 1.00E+00 | 3.85  | 3.17E-04 | 7.06E-02 |
| <b>ABHD6</b>       | 0.28  | 3.85E-01 | 1.00E+00 | -1.13 | 3.28E-04 | 7.21E-02 |
| <b>IGKV3D-11</b>   | 4.01  | 1.82E-01 | 1.00E+00 | 5.05  | 3.30E-04 | 7.21E-02 |
| <b>MTRNR2L1</b>    | -1.45 | 6.71E-01 | 1.00E+00 | -3.38 | 3.44E-04 | 7.44E-02 |
| <b>TMEM271</b>     | -0.66 | 1.69E-01 | 1.00E+00 | -3.38 | 3.51E-04 | 7.44E-02 |
| <b>PM20D2</b>      | 0.05  | 8.85E-01 | 1.00E+00 | -0.99 | 3.53E-04 | 7.44E-02 |
| <b>ZNF469</b>      | -0.66 | 1.97E-01 | 1.00E+00 | 3.36  | 3.55E-04 | 7.44E-02 |
| <b>COLQ</b>        | 0.38  | 7.51E-01 | 1.00E+00 | 3.27  | 3.55E-04 | 7.44E-02 |
| <b>XLOC_007264</b> | 2.08  | 2.48E-01 | 1.00E+00 | -2.43 | 3.58E-04 | 7.44E-02 |
| <b>AC040174.1</b>  | 0.05  | 9.36E-01 | 1.00E+00 | -3.01 | 3.66E-04 | 7.54E-02 |
| <b>FKBP10</b>      | 0.22  | 6.20E-01 | 1.00E+00 | 2.50  | 3.76E-04 | 7.68E-02 |
| <b>NCF1</b>        | -0.27 | 6.29E-01 | 1.00E+00 | 3.33  | 3.82E-04 | 7.75E-02 |
| <b>B3GNT7</b>      | -0.84 | 7.98E-02 | 1.00E+00 | 1.56  | 3.88E-04 | 7.79E-02 |
| <b>IGHV1-8</b>     | 1.75  | 4.44E-01 | 1.00E+00 | 5.23  | 3.95E-04 | 7.86E-02 |
| <b>PKIA</b>        | 0.13  | 7.57E-01 | 1.00E+00 | -2.34 | 4.00E-04 | 7.90E-02 |
| <b>RCN3</b>        | 0.13  | 7.93E-01 | 1.00E+00 | 1.57  | 4.13E-04 | 8.01E-02 |
| <b>IFIT1</b>       | 0.01  | 9.95E-01 | 1.00E+00 | 2.28  | 4.15E-04 | 8.01E-02 |
| <b>XLOC_004545</b> | 1.89  | 1.14E-01 | 1.00E+00 | -7.22 | 4.15E-04 | 8.01E-02 |

|                    |       |          |          |       |          |          |
|--------------------|-------|----------|----------|-------|----------|----------|
| <b>CCDC121</b>     | 0.53  | 1.63E-01 | 1.00E+00 | -1.36 | 4.31E-04 | 8.25E-02 |
| <b>IGFL1</b>       | -1.86 | 4.76E-02 | 1.00E+00 | 3.40  | 4.43E-04 | 8.42E-02 |
| <b>XLOC_002675</b> | 0.66  | 5.08E-01 | 1.00E+00 | 2.47  | 4.48E-04 | 8.44E-02 |
| <b>ANKRD30BL</b>   | -1.19 | 5.23E-01 | 1.00E+00 | -3.03 | 4.56E-04 | 8.53E-02 |
| <b>STAP1</b>       | 1.63  | 6.90E-02 | 1.00E+00 | 2.59  | 4.65E-04 | 8.58E-02 |
| <b>NDUFA7</b>      | 0.37  | 7.69E-01 | 1.00E+00 | -1.95 | 4.66E-04 | 8.58E-02 |
| <b>AP002986.1</b>  | 0.90  | 5.16E-01 | 1.00E+00 | -2.34 | 4.70E-04 | 8.58E-02 |
| <b>AL359182.1</b>  | 0.15  | 8.75E-01 | 1.00E+00 | 2.12  | 4.73E-04 | 8.58E-02 |
| <b>AP001043.1</b>  | 0.22  | 7.91E-01 | 1.00E+00 | 1.88  | 4.76E-04 | 8.58E-02 |
| <b>ECM1</b>        | 0.25  | 3.88E-01 | 1.00E+00 | 0.93  | 4.84E-04 | 8.66E-02 |
| <b>FAM20C</b>      | -0.45 | 7.60E-02 | 1.00E+00 | 2.35  | 4.90E-04 | 8.71E-02 |
| <b>AC112491.1</b>  | NA    | NA       | NA       | -3.26 | 5.03E-04 | 8.87E-02 |
| <b>AC138207.8</b>  | -0.34 | 3.52E-01 | 1.00E+00 | -1.16 | 5.11E-04 | 8.95E-02 |
| <b>LYZ</b>         | -0.44 | 3.06E-01 | 1.00E+00 | 3.13  | 5.19E-04 | 9.01E-02 |
| <b>DERL3</b>       | 0.07  | 9.50E-01 | 1.00E+00 | 2.79  | 5.23E-04 | 9.03E-02 |
| <b>CFAP65</b>      | -3.02 | 2.76E-02 | 9.71E-01 | -3.87 | 5.28E-04 | 9.05E-02 |
| <b>GALNT5</b>      | -0.44 | 4.30E-01 | 1.00E+00 | 2.30  | 5.36E-04 | 9.11E-02 |
| <b>AC007952.4</b>  | -0.27 | 8.30E-01 | 1.00E+00 | -2.57 | 5.58E-04 | 9.36E-02 |
| <b>FAM89B</b>      | -0.45 | 6.28E-01 | 1.00E+00 | -2.06 | 5.60E-04 | 9.36E-02 |
| <b>AC004130.1</b>  | 0.42  | 4.42E-01 | 1.00E+00 | -1.88 | 5.62E-04 | 9.36E-02 |
| <b>CD14</b>        | -0.15 | 7.38E-01 | 1.00E+00 | 1.92  | 5.79E-04 | 9.53E-02 |
| <b>MIR3936HG</b>   | 0.32  | 6.95E-01 | 1.00E+00 | -1.88 | 5.81E-04 | 9.53E-02 |
| <b>AC026356.2</b>  | 0.48  | 6.96E-01 | 1.00E+00 | 4.26  | 5.83E-04 | 9.53E-02 |
| <b>MTCO1P40</b>    | -0.86 | 5.66E-01 | 1.00E+00 | 2.66  | 5.88E-04 | 9.54E-02 |
| <b>CAMP</b>        | 1.85  | 1.25E-01 | 1.00E+00 | 3.54  | 6.01E-04 | 9.68E-02 |
| <b>TTC3P1</b>      | -0.40 | 6.15E-02 | 1.00E+00 | -1.08 | 6.04E-04 | 9.68E-02 |
| <b>AC010198.1</b>  | -3.72 | 3.82E-02 | 1.00E+00 | -4.34 | 6.13E-04 | 9.76E-02 |
| <b>PLAUR</b>       | -0.57 | 6.84E-02 | 1.00E+00 | 1.74  | 6.23E-04 | 9.82E-02 |
| <b>IGKV2-28</b>    | 4.39  | 6.75E-04 | 1.24E-01 | 3.99  | 6.28E-04 | 9.82E-02 |
| <b>JCHAIN</b>      | 4.73  | 1.58E-10 | 9.19E-08 | 2.66  | 6.29E-04 | 9.82E-02 |
| <b>SNORA12</b>     | 0.56  | 8.71E-01 | 1.00E+00 | -2.75 | 6.33E-04 | 9.82E-02 |
| <b>HHIP-AS1</b>    | -3.05 | 2.08E-02 | 8.94E-01 | -2.85 | 6.43E-04 | 9.91E-02 |

|                      |       |          |          |       |          |          |
|----------------------|-------|----------|----------|-------|----------|----------|
| <b>ADAM12</b>        | 1.63  | 1.01E-01 | 1.00E+00 | 2.90  | 6.50E-04 | 9.96E-02 |
| <b>SEMA6B</b>        | 0.04  | 9.32E-01 | 1.00E+00 | 3.37  | 6.58E-04 | 1.00E-01 |
| <b>AGTRAP</b>        | 0.13  | 7.36E-01 | 1.00E+00 | 0.86  | 6.95E-04 | 1.05E-01 |
| <b>HMG11P36</b>      | -0.41 | 6.18E-01 | 1.00E+00 | -1.43 | 7.03E-04 | 1.05E-01 |
| <b>CEMIP</b>         | -0.57 | 2.89E-01 | 1.00E+00 | 2.74  | 7.06E-04 | 1.05E-01 |
| <b>RP11-292F22.7</b> | -2.21 | 9.74E-02 | 1.00E+00 | -4.40 | 7.14E-04 | 1.06E-01 |
| <b>IGKV1-27</b>      | -2.80 | 2.81E-01 | 1.00E+00 | 4.85  | 7.16E-04 | 1.06E-01 |
| <b>C10orf99</b>      | -0.69 | 2.84E-01 | 1.00E+00 | 3.01  | 7.30E-04 | 1.07E-01 |
| <b>AC012146.1</b>    | -0.63 | 5.48E-01 | 1.00E+00 | -2.16 | 7.66E-04 | 1.12E-01 |
| <b>ARMC10P1</b>      | 0.12  | 8.63E-01 | 1.00E+00 | -2.43 | 7.72E-04 | 1.12E-01 |
| <b>LILRB4</b>        | 0.12  | 8.24E-01 | 1.00E+00 | 3.41  | 7.96E-04 | 1.15E-01 |
| <b>LINC01050</b>     | NA    | NA       | NA       | 5.83  | 8.08E-04 | 1.16E-01 |
| <b>AP001362.2</b>    | -0.35 | 5.54E-01 | 1.00E+00 | -1.41 | 8.40E-04 | 1.20E-01 |
| <b>PDPN</b>          | -0.16 | 6.58E-01 | 1.00E+00 | 1.37  | 8.52E-04 | 1.21E-01 |
| <b>TRDN-AS1</b>      | 2.23  | 2.38E-01 | 1.00E+00 | -4.89 | 8.69E-04 | 1.22E-01 |
| <b>MMP13</b>         | 0.61  | 5.65E-01 | 1.00E+00 | 3.85  | 8.77E-04 | 1.23E-01 |
| <b>KRT6B</b>         | -0.08 | 8.83E-01 | 1.00E+00 | 3.03  | 8.82E-04 | 1.23E-01 |
| <b>AL020996.1</b>    | -0.31 | 6.64E-01 | 1.00E+00 | -1.89 | 9.20E-04 | 1.26E-01 |
| <b>SAMD9</b>         | -0.50 | 5.05E-01 | 1.00E+00 | 1.84  | 9.21E-04 | 1.26E-01 |
| <b>VAV1</b>          | 0.02  | 9.74E-01 | 1.00E+00 | 3.08  | 9.22E-04 | 1.26E-01 |
| <b>CDK8P2</b>        | -3.65 | 1.79E-02 | 8.39E-01 | -4.34 | 9.23E-04 | 1.26E-01 |
| <b>NCF1B</b>         | 0.24  | 7.27E-01 | 1.00E+00 | 2.73  | 9.28E-04 | 1.26E-01 |
| <b>PPT2-EGFL8</b>    | 1.27  | 7.13E-01 | 1.00E+00 | -4.64 | 9.64E-04 | 1.30E-01 |
| <b>HIST1H4E</b>      | -0.15 | 8.00E-01 | 1.00E+00 | -2.66 | 9.90E-04 | 1.32E-01 |
| <b>HEBP2</b>         | 0.12  | 6.25E-01 | 1.00E+00 | -1.94 | 9.91E-04 | 1.32E-01 |
| <b>GBP3</b>          | -0.01 | 9.84E-01 | 1.00E+00 | 1.41  | 1.00E-03 | 1.32E-01 |
| <b>AC022784.1</b>    | 0.28  | 5.42E-01 | 1.00E+00 | -1.90 | 1.00E-03 | 1.32E-01 |
| <b>SH3PXD2B</b>      | -0.25 | 4.61E-01 | 1.00E+00 | 1.85  | 1.01E-03 | 1.32E-01 |
| <b>LINC02030</b>     | -0.85 | 5.83E-01 | 1.00E+00 | -4.57 | 1.02E-03 | 1.33E-01 |
| <b>CKB</b>           | -0.49 | 6.27E-04 | 1.18E-01 | -0.84 | 1.02E-03 | 1.33E-01 |
| <b>ZNF66</b>         | 0.04  | 9.37E-01 | 1.00E+00 | -1.45 | 1.04E-03 | 1.34E-01 |
| <b>XLOC_013542</b>   | -1.20 | 5.69E-01 | 1.00E+00 | 4.05  | 1.05E-03 | 1.35E-01 |

|                   |       |          |          |       |          |          |
|-------------------|-------|----------|----------|-------|----------|----------|
| <b>IGHV1-18</b>   | 2.63  | 1.22E-01 | 1.00E+00 | 4.68  | 1.06E-03 | 1.35E-01 |
| <b>AK4</b>        | 0.10  | 6.94E-01 | 1.00E+00 | -0.52 | 1.06E-03 | 1.35E-01 |
| <b>TRIM25</b>     | 0.68  | 7.33E-02 | 1.00E+00 | 1.24  | 1.07E-03 | 1.35E-01 |
| <b>IGHV3-33</b>   | 2.96  | 1.86E-02 | 8.56E-01 | 4.90  | 1.08E-03 | 1.36E-01 |
| <b>AL139289.2</b> | -0.09 | 8.39E-01 | 1.00E+00 | -1.78 | 1.12E-03 | 1.40E-01 |
| <b>ACP5</b>       | 0.01  | 9.69E-01 | 1.00E+00 | 1.44  | 1.14E-03 | 1.42E-01 |
| <b>IL6R</b>       | 0.36  | 3.16E-01 | 1.00E+00 | 1.11  | 1.18E-03 | 1.45E-01 |
| <b>CCL3L3</b>     | 0.25  | 9.42E-01 | 1.00E+00 | 4.19  | 1.18E-03 | 1.45E-01 |
| <b>LINC01579</b>  | 0.63  | 5.14E-01 | 1.00E+00 | -2.69 | 1.18E-03 | 1.45E-01 |
| <b>OASL</b>       | -0.39 | 7.56E-01 | 1.00E+00 | 2.76  | 1.19E-03 | 1.45E-01 |
| <b>OSCAR</b>      | -0.21 | 5.15E-01 | 1.00E+00 | 2.23  | 1.21E-03 | 1.46E-01 |
| <b>ANAPC4</b>     | 0.16  | 4.95E-01 | 1.00E+00 | -0.87 | 1.22E-03 | 1.47E-01 |
| <b>AL445205.1</b> | -2.20 | 9.25E-02 | 1.00E+00 | 3.14  | 1.22E-03 | 1.47E-01 |
| <b>LINC01186</b>  | -1.29 | 6.84E-01 | 1.00E+00 | -2.41 | 1.26E-03 | 1.51E-01 |
| <b>SLC14A1</b>    | 0.46  | 7.05E-01 | 1.00E+00 | -2.17 | 1.29E-03 | 1.52E-01 |
| <b>SERPINA1</b>   | -0.48 | 3.23E-01 | 1.00E+00 | 2.69  | 1.29E-03 | 1.52E-01 |
| <b>GRID1</b>      | 0.05  | 8.96E-01 | 1.00E+00 | 1.88  | 1.30E-03 | 1.53E-01 |
| <b>IFIT2</b>      | -1.10 | 3.24E-01 | 1.00E+00 | 1.92  | 1.31E-03 | 1.53E-01 |
| <b>RNU2-59P</b>   | 0.53  | 7.32E-01 | 1.00E+00 | -2.62 | 1.32E-03 | 1.53E-01 |
| <b>MSR1</b>       | 0.08  | 8.45E-01 | 1.00E+00 | 2.37  | 1.33E-03 | 1.53E-01 |
| <b>APLN</b>       | 0.60  | 3.41E-01 | 1.00E+00 | 2.60  | 1.33E-03 | 1.53E-01 |
| <b>NOG</b>        | 0.07  | 8.78E-01 | 1.00E+00 | 2.04  | 1.34E-03 | 1.53E-01 |
| <b>AL121601.1</b> | 0.13  | 9.70E-01 | 1.00E+00 | -3.05 | 1.34E-03 | 1.53E-01 |
| <b>IGHV3-74</b>   | 6.41  | 6.21E-11 | 3.76E-08 | 3.39  | 1.35E-03 | 1.53E-01 |
| <b>FAM133CP</b>   | 0.25  | 8.12E-01 | 1.00E+00 | 1.77  | 1.35E-03 | 1.53E-01 |
| <b>MFSD2B</b>     | 1.78  | 2.54E-01 | 1.00E+00 | 2.16  | 1.35E-03 | 1.53E-01 |
| <b>IGHV3-15</b>   | 4.33  | 3.33E-04 | 7.10E-02 | 3.94  | 1.37E-03 | 1.54E-01 |
| <b>IGLV3-19</b>   | 8.44  | 3.08E-04 | 6.69E-02 | 6.11  | 1.38E-03 | 1.54E-01 |
| <b>C11orf87</b>   | -6.05 | 1.07E-04 | 2.56E-02 | 3.69  | 1.39E-03 | 1.54E-01 |
| <b>AGXT</b>       | 1.57  | 3.69E-01 | 1.00E+00 | -4.58 | 1.44E-03 | 1.59E-01 |
| <b>IGHV4-31</b>   | 1.20  | 6.55E-01 | 1.00E+00 | 4.58  | 1.44E-03 | 1.59E-01 |
| <b>SLC11A1</b>    | 0.39  | 3.51E-01 | 1.00E+00 | 2.14  | 1.46E-03 | 1.60E-01 |

|                    |       |          |          |       |          |          |
|--------------------|-------|----------|----------|-------|----------|----------|
| <b>MFAP2</b>       | 0.09  | 8.30E-01 | 1.00E+00 | 1.16  | 1.46E-03 | 1.60E-01 |
| <b>CD79A</b>       | 1.17  | 8.54E-02 | 1.00E+00 | 3.23  | 1.47E-03 | 1.60E-01 |
| <b>PXMP2</b>       | -0.12 | 8.94E-01 | 1.00E+00 | -1.94 | 1.49E-03 | 1.61E-01 |
| <b>FGFR2</b>       | 0.08  | 7.23E-01 | 1.00E+00 | -1.26 | 1.50E-03 | 1.62E-01 |
| <b>AL365361.1</b>  | -2.22 | 9.73E-02 | 1.00E+00 | 3.75  | 1.51E-03 | 1.62E-01 |
| <b>IGSF6</b>       | -0.86 | 1.20E-01 | 1.00E+00 | 1.57  | 1.52E-03 | 1.63E-01 |
| <b>IGKV1-39</b>    | 4.05  | 1.18E-03 | 1.81E-01 | 4.32  | 1.53E-03 | 1.63E-01 |
| <b>IGLL5</b>       | 3.96  | 7.94E-02 | 1.00E+00 | 4.53  | 1.53E-03 | 1.63E-01 |
| <b>PAPPA</b>       | 0.11  | 8.03E-01 | 1.00E+00 | 2.21  | 1.54E-03 | 1.63E-01 |
| <b>MSH3</b>        | 0.15  | 4.44E-01 | 1.00E+00 | -0.44 | 1.57E-03 | 1.65E-01 |
| <b>KCNC3</b>       | -0.61 | 1.81E-01 | 1.00E+00 | 2.82  | 1.57E-03 | 1.65E-01 |
| <b>MMP11</b>       | -0.65 | 2.72E-01 | 1.00E+00 | 2.75  | 1.62E-03 | 1.69E-01 |
| <b>CPXM1</b>       | -1.64 | 2.99E-03 | 2.87E-01 | 2.55  | 1.63E-03 | 1.69E-01 |
| <b>SPANXA2-OT1</b> | 2.93  | 1.09E-01 | 1.00E+00 | -4.50 | 1.64E-03 | 1.70E-01 |
| <b>RFX8</b>        | -1.37 | 3.84E-01 | 1.00E+00 | 3.24  | 1.65E-03 | 1.70E-01 |
| <b>CD48</b>        | -0.32 | 6.26E-01 | 1.00E+00 | 2.70  | 1.68E-03 | 1.72E-01 |
| <b>ATOH7</b>       | -1.61 | 4.51E-01 | 1.00E+00 | -3.93 | 1.70E-03 | 1.74E-01 |
| <b>AC100771.2</b>  | 1.56  | 7.65E-02 | 1.00E+00 | -3.05 | 1.73E-03 | 1.76E-01 |
| <b>SPINK9</b>      | -2.18 | 3.84E-01 | 1.00E+00 | 3.50  | 1.74E-03 | 1.76E-01 |
| <b>S100A8</b>      | -0.95 | 1.90E-01 | 1.00E+00 | 2.79  | 1.74E-03 | 1.76E-01 |
| <b>CTSA</b>        | -0.09 | 6.60E-01 | 1.00E+00 | 0.37  | 1.77E-03 | 1.76E-01 |
| <b>AP000580.1</b>  | 1.85  | 4.48E-01 | 1.00E+00 | -2.70 | 1.78E-03 | 1.76E-01 |
| <b>G5850</b>       | -0.09 | 9.62E-01 | 1.00E+00 | -4.98 | 1.78E-03 | 1.76E-01 |
| <b>IFNG-AS1</b>    | -1.63 | 6.25E-01 | 1.00E+00 | 4.25  | 1.80E-03 | 1.76E-01 |
| <b>PCCA</b>        | 0.09  | 7.36E-01 | 1.00E+00 | -0.73 | 1.81E-03 | 1.76E-01 |
| <b>NLGN4Y</b>      | -0.86 | 2.46E-01 | 1.00E+00 | 3.96  | 1.82E-03 | 1.76E-01 |
| <b>CERNA2</b>      | -1.96 | 2.04E-01 | 1.00E+00 | 4.40  | 1.83E-03 | 1.76E-01 |
| <b>GREM1</b>       | 0.06  | 9.14E-01 | 1.00E+00 | 2.00  | 1.83E-03 | 1.76E-01 |
| <b>THBS1</b>       | 0.21  | 7.17E-01 | 1.00E+00 | 1.61  | 1.84E-03 | 1.76E-01 |
| <b>ALPL</b>        | 0.26  | 6.64E-01 | 1.00E+00 | 2.27  | 1.84E-03 | 1.76E-01 |
| <b>FHAD1</b>       | 0.50  | 4.55E-01 | 1.00E+00 | 2.79  | 1.85E-03 | 1.76E-01 |
| <b>B4GALT1-AS1</b> | 0.46  | 3.91E-01 | 1.00E+00 | -1.76 | 1.85E-03 | 1.76E-01 |

|                    |       |          |          |       |          |          |
|--------------------|-------|----------|----------|-------|----------|----------|
| <b>IGLV6-57</b>    | 1.72  | 2.68E-01 | 1.00E+00 | 4.11  | 1.86E-03 | 1.76E-01 |
| <b>CP</b>          | 0.54  | 2.99E-01 | 1.00E+00 | 1.98  | 1.86E-03 | 1.76E-01 |
| <b>G10215</b>      | 2.28  | 3.75E-01 | 1.00E+00 | -3.12 | 1.87E-03 | 1.76E-01 |
| <b>AC097534.1</b>  | -0.94 | 3.70E-01 | 1.00E+00 | -2.38 | 1.88E-03 | 1.76E-01 |
| <b>RXYLT1</b>      | -0.27 | 1.89E-01 | 1.00E+00 | -0.80 | 1.88E-03 | 1.76E-01 |
| <b>PLPP4</b>       | -1.17 | 2.12E-01 | 1.00E+00 | 1.65  | 1.89E-03 | 1.76E-01 |
| <b>XLOC_002813</b> | -1.09 | 6.15E-01 | 1.00E+00 | 4.45  | 1.89E-03 | 1.76E-01 |
| <b>DPYSL4</b>      | -1.28 | 1.84E-02 | 8.51E-01 | 3.01  | 1.89E-03 | 1.76E-01 |
| <b>XLOC_002925</b> | -2.26 | 6.71E-02 | 1.00E+00 | -2.29 | 1.92E-03 | 1.77E-01 |
| <b>LINC00273</b>   | -0.80 | 8.18E-01 | 1.00E+00 | -3.10 | 1.92E-03 | 1.77E-01 |
| <b>IGHV3-48</b>    | 2.20  | 5.15E-01 | 1.00E+00 | 3.82  | 1.93E-03 | 1.77E-01 |
| <b>NELL2</b>       | -0.14 | 8.24E-01 | 1.00E+00 | 1.68  | 1.93E-03 | 1.77E-01 |
| <b>SLC13A5</b>     | -0.61 | 7.33E-01 | 1.00E+00 | 3.12  | 1.94E-03 | 1.77E-01 |
| <b>NLGN2</b>       | -0.30 | 4.23E-01 | 1.00E+00 | 2.49  | 1.95E-03 | 1.77E-01 |
| <b>PAK5</b>        | -0.32 | 6.02E-01 | 1.00E+00 | -2.81 | 1.95E-03 | 1.77E-01 |
| <b>RNU2-61P</b>    | NA    | NA       | NA       | -3.17 | 1.96E-03 | 1.77E-01 |
| <b>C1QC</b>        | 0.15  | 7.72E-01 | 1.00E+00 | 2.10  | 1.98E-03 | 1.78E-01 |
| <b>C5orf64</b>     | 3.60  | 5.09E-02 | 1.00E+00 | -4.27 | 1.99E-03 | 1.79E-01 |
| <b>AC131392.1</b>  | 0.79  | 4.85E-01 | 1.00E+00 | -2.07 | 2.00E-03 | 1.79E-01 |
| <b>IGHV3-20</b>    | 1.52  | 6.57E-01 | 1.00E+00 | 6.05  | 2.01E-03 | 1.79E-01 |
| <b>RENBP</b>       | 0.16  | 6.45E-01 | 1.00E+00 | 2.55  | 2.01E-03 | 1.79E-01 |
| <b>AL160006.1</b>  | 1.04  | 5.30E-02 | 1.00E+00 | 1.07  | 2.04E-03 | 1.80E-01 |
| <b>LINC01094</b>   | -0.50 | 3.57E-01 | 1.00E+00 | 1.11  | 2.05E-03 | 1.80E-01 |
| <b>HMGB1P24</b>    | -0.88 | 8.01E-01 | 1.00E+00 | -2.33 | 2.07E-03 | 1.80E-01 |
| <b>C19orf66</b>    | -0.20 | 6.75E-01 | 1.00E+00 | 1.10  | 2.07E-03 | 1.80E-01 |
| <b>GPSM3</b>       | -0.23 | 5.09E-01 | 1.00E+00 | 1.80  | 2.07E-03 | 1.80E-01 |
| <b>IGKV1D-33</b>   | 6.69  | 2.98E-02 | 9.97E-01 | 4.45  | 2.08E-03 | 1.80E-01 |
| <b>TNFSF13B</b>    | -0.19 | 7.41E-01 | 1.00E+00 | 1.71  | 2.09E-03 | 1.80E-01 |
| <b>POU2F2</b>      | -0.19 | 6.86E-01 | 1.00E+00 | 2.26  | 2.09E-03 | 1.80E-01 |
| <b>AC079313.2</b>  | -0.70 | 6.26E-01 | 1.00E+00 | -2.49 | 2.09E-03 | 1.80E-01 |
| <b>AC144831.1</b>  | 0.55  | 3.08E-01 | 1.00E+00 | 1.53  | 2.10E-03 | 1.80E-01 |
| <b>ABCA1</b>       | 0.68  | 2.13E-02 | 8.94E-01 | 1.00  | 2.12E-03 | 1.80E-01 |

|                   |       |          |          |       |          |          |
|-------------------|-------|----------|----------|-------|----------|----------|
| <b>COL27A1</b>    | -0.37 | 3.64E-01 | 1.00E+00 | 2.01  | 2.12E-03 | 1.80E-01 |
| <b>PABPC1P4</b>   | -0.14 | 7.87E-01 | 1.00E+00 | 0.98  | 2.13E-03 | 1.80E-01 |
| <b>AKNA</b>       | 0.17  | 6.13E-01 | 1.00E+00 | 2.61  | 2.16E-03 | 1.82E-01 |
| <b>WISP1</b>      | 0.44  | 4.70E-01 | 1.00E+00 | 2.30  | 2.16E-03 | 1.82E-01 |
| <b>HAMP</b>       | 0.07  | 9.58E-01 | 1.00E+00 | 2.56  | 2.18E-03 | 1.83E-01 |
| <b>SVIP</b>       | 0.27  | 1.82E-01 | 1.00E+00 | -1.32 | 2.19E-03 | 1.83E-01 |
| <b>TSGA10IP</b>   | 0.86  | 3.97E-01 | 1.00E+00 | 2.22  | 2.19E-03 | 1.83E-01 |
| <b>PPM1B</b>      | 0.23  | 4.55E-01 | 1.00E+00 | -1.12 | 2.20E-03 | 1.83E-01 |
| <b>ABL2</b>       | -0.05 | 8.24E-01 | 1.00E+00 | 1.15  | 2.25E-03 | 1.86E-01 |
| <b>AL662884.3</b> | -1.60 | 6.43E-01 | 1.00E+00 | -2.54 | 2.27E-03 | 1.86E-01 |
| <b>CFB</b>        | -0.66 | 4.71E-01 | 1.00E+00 | 1.69  | 2.28E-03 | 1.86E-01 |
| <b>IGLC3</b>      | 4.73  | 3.28E-11 | 2.11E-08 | 3.17  | 2.28E-03 | 1.86E-01 |
| <b>UVRAG-DT</b>   | 1.22  | 5.47E-03 | 4.37E-01 | -0.98 | 2.29E-03 | 1.86E-01 |
| <b>SLC38A5</b>    | -0.11 | 7.07E-01 | 1.00E+00 | 1.06  | 2.29E-03 | 1.86E-01 |
| <b>DMXL2</b>      | 0.04  | 9.26E-01 | 1.00E+00 | 1.77  | 2.29E-03 | 1.86E-01 |
| <b>AKR1B15</b>    | 0.18  | 7.92E-01 | 1.00E+00 | 2.39  | 2.32E-03 | 1.87E-01 |
| <b>PGBD5</b>      | -0.24 | 7.11E-01 | 1.00E+00 | 2.72  | 2.33E-03 | 1.88E-01 |
| <b>ACTG1P14</b>   | -0.51 | 8.83E-01 | 1.00E+00 | 4.01  | 2.35E-03 | 1.88E-01 |
| <b>EHHADH</b>     | 0.32  | 3.95E-01 | 1.00E+00 | -0.90 | 2.35E-03 | 1.88E-01 |
| <b>SPRR1A</b>     | -0.45 | 5.30E-01 | 1.00E+00 | 2.55  | 2.36E-03 | 1.88E-01 |
| <b>SLC35E2A</b>   | -0.95 | 5.26E-02 | 1.00E+00 | -0.88 | 2.37E-03 | 1.88E-01 |
| <b>AC112243.1</b> | -1.23 | 4.04E-01 | 1.00E+00 | -4.81 | 2.43E-03 | 1.92E-01 |
| <b>EXOSC6</b>     | -0.22 | 3.03E-01 | 1.00E+00 | -0.66 | 2.43E-03 | 1.92E-01 |
| <b>LGALS9</b>     | 0.20  | 7.14E-01 | 1.00E+00 | 1.73  | 2.47E-03 | 1.95E-01 |
| <b>AP001107.9</b> | -0.81 | 3.68E-02 | 1.00E+00 | -1.23 | 2.51E-03 | 1.97E-01 |
| <b>TP53I3</b>     | -0.18 | 6.49E-01 | 1.00E+00 | 0.97  | 2.54E-03 | 1.98E-01 |
| <b>B4GALT1</b>    | -0.08 | 6.93E-01 | 1.00E+00 | 1.19  | 2.54E-03 | 1.98E-01 |
| <b>AC009275.1</b> | -0.87 | 6.81E-01 | 1.00E+00 | 3.21  | 2.56E-03 | 1.99E-01 |
| <b>DDX60L</b>     | 0.00  | 9.96E-01 | 1.00E+00 | 1.47  | 2.58E-03 | 2.00E-01 |
| <b>AL512343.2</b> | 6.06  | 2.48E-02 | 9.28E-01 | -3.20 | 2.59E-03 | 2.00E-01 |
| <b>AC063960.1</b> | 0.11  | 9.28E-01 | 1.00E+00 | -4.00 | 2.60E-03 | 2.00E-01 |
| <b>MT-TY</b>      | 0.83  | 4.47E-01 | 1.00E+00 | -2.23 | 2.61E-03 | 2.01E-01 |

|                   |       |          |          |       |          |          |
|-------------------|-------|----------|----------|-------|----------|----------|
| <b>BCL7C</b>      | 0.15  | 5.19E-01 | 1.00E+00 | -1.50 | 2.64E-03 | 2.02E-01 |
| <b>TCERG1L</b>    | -0.12 | 8.97E-01 | 1.00E+00 | -2.94 | 2.66E-03 | 2.03E-01 |
| <b>AC007098.1</b> | -0.52 | 5.65E-01 | 1.00E+00 | -1.32 | 2.68E-03 | 2.03E-01 |
| <b>TMPRSS11D</b>  | -3.69 | 1.11E-02 | 6.49E-01 | 4.23  | 2.68E-03 | 2.03E-01 |
| <b>CTPS2</b>      | 0.33  | 2.92E-01 | 1.00E+00 | -0.60 | 2.71E-03 | 2.04E-01 |
| <b>AC110995.1</b> | 0.48  | 5.04E-01 | 1.00E+00 | 1.64  | 2.71E-03 | 2.04E-01 |
| <b>STC2</b>       | -0.30 | 4.92E-01 | 1.00E+00 | 1.90  | 2.72E-03 | 2.05E-01 |
| <b>AL031728.1</b> | 0.00  | 1.00E+00 | 1.00E+00 | 3.11  | 2.73E-03 | 2.05E-01 |
| <b>SH3GL2</b>     | -6.02 | 8.99E-09 | 4.25E-06 | -4.48 | 2.77E-03 | 2.05E-01 |
| <b>SLAMF8</b>     | -1.22 | 5.62E-02 | 1.00E+00 | 2.16  | 2.77E-03 | 2.05E-01 |
| <b>ZNF295-AS1</b> | 0.08  | 9.65E-01 | 1.00E+00 | -2.39 | 2.78E-03 | 2.05E-01 |
| <b>AC005034.4</b> | -0.98 | 6.95E-01 | 1.00E+00 | -4.24 | 2.79E-03 | 2.05E-01 |
| <b>AC008105.2</b> | 4.45  | 4.67E-04 | 9.32E-02 | -1.77 | 2.79E-03 | 2.05E-01 |
| <b>IRF7</b>       | -0.37 | 6.00E-01 | 1.00E+00 | 1.72  | 2.80E-03 | 2.05E-01 |
| <b>GPAA1P1</b>    | 1.17  | 7.31E-01 | 1.00E+00 | 3.13  | 2.81E-03 | 2.05E-01 |
| <b>LINC01605</b>  | -0.57 | 1.98E-01 | 1.00E+00 | 1.95  | 2.82E-03 | 2.05E-01 |
| <b>CD86</b>       | 0.03  | 9.41E-01 | 1.00E+00 | 1.41  | 2.82E-03 | 2.05E-01 |
| <b>BBS10</b>      | 0.16  | 5.44E-01 | 1.00E+00 | -0.73 | 2.83E-03 | 2.05E-01 |
| <b>AC064807.4</b> | -0.26 | 8.11E-01 | 1.00E+00 | -3.12 | 2.83E-03 | 2.05E-01 |
| <b>PTCRA</b>      | -0.12 | 9.73E-01 | 1.00E+00 | 3.93  | 2.85E-03 | 2.06E-01 |
| <b>RPL12P14</b>   | -1.48 | 6.61E-01 | 1.00E+00 | -2.63 | 2.87E-03 | 2.07E-01 |
| <b>ID4</b>        | 0.13  | 6.24E-01 | 1.00E+00 | -1.51 | 2.90E-03 | 2.07E-01 |
| <b>NOC2LP1</b>    | -1.33 | 5.91E-02 | 1.00E+00 | -1.54 | 2.91E-03 | 2.07E-01 |
| <b>BST2</b>       | -0.48 | 5.33E-01 | 1.00E+00 | 2.02  | 2.92E-03 | 2.07E-01 |
| <b>KLHL6</b>      | 0.08  | 8.82E-01 | 1.00E+00 | 2.94  | 2.92E-03 | 2.07E-01 |
| <b>C5AR2</b>      | -0.62 | 1.75E-01 | 1.00E+00 | 2.33  | 2.93E-03 | 2.07E-01 |
| <b>GRN</b>        | -0.25 | 2.14E-01 | 1.00E+00 | 0.90  | 2.93E-03 | 2.07E-01 |
| <b>LCE3D</b>      | -0.23 | 7.28E-01 | 1.00E+00 | 2.30  | 2.94E-03 | 2.07E-01 |
| <b>AL683887.1</b> | -3.03 | 2.77E-02 | 9.71E-01 | -1.88 | 2.95E-03 | 2.07E-01 |
| <b>ABHD10</b>     | 0.21  | 3.81E-01 | 1.00E+00 | -1.11 | 2.95E-03 | 2.07E-01 |
| <b>REEP3</b>      | 0.16  | 4.84E-01 | 1.00E+00 | -0.64 | 2.96E-03 | 2.07E-01 |
| <b>FYB1</b>       | -0.12 | 7.86E-01 | 1.00E+00 | 1.67  | 2.98E-03 | 2.08E-01 |



|                  |       |          |          |       |          |          |
|------------------|-------|----------|----------|-------|----------|----------|
| <b>FPR3</b>      | -0.04 | 9.42E-01 | 1.00E+00 | 2.01  | 2.98E-03 | 2.08E-01 |
| <b>PKD1P5</b>    | 0.07  | 9.29E-01 | 1.00E+00 | 3.21  | 2.99E-03 | 2.08E-01 |
| <b>SPRR1B</b>    | -0.96 | 1.93E-01 | 1.00E+00 | 2.40  | 3.00E-03 | 2.08E-01 |
| <b>COL12A1</b>   | 0.47  | 4.01E-01 | 1.00E+00 | 1.71  | 3.03E-03 | 2.09E-01 |
| <b>FBXL3</b>     | 0.30  | 2.66E-01 | 1.00E+00 | -1.00 | 3.13E-03 | 2.15E-01 |
| <b>IRF9</b>      | 0.59  | 6.92E-01 | 1.00E+00 | 1.74  | 3.17E-03 | 2.18E-01 |
| <b>NFAM1</b>     | 0.01  | 9.86E-01 | 1.00E+00 | 2.29  | 3.20E-03 | 2.19E-01 |
| <b>HIST1H1B</b>  | -1.71 | 1.81E-01 | 1.00E+00 | -3.11 | 3.22E-03 | 2.19E-01 |
| <b>PLA2R1</b>    | -0.24 | 6.31E-01 | 1.00E+00 | -1.06 | 3.22E-03 | 2.19E-01 |
| <b>BMF</b>       | -0.07 | 8.05E-01 | 1.00E+00 | 2.05  | 3.23E-03 | 2.19E-01 |
| <b>SDS</b>       | -1.05 | 2.34E-01 | 1.00E+00 | 2.67  | 3.23E-03 | 2.19E-01 |
| <b>IGKV1D-17</b> | 2.02  | 5.50E-01 | 1.00E+00 | 6.14  | 3.24E-03 | 2.19E-01 |
| <b>SAMM50</b>    | 0.13  | 6.24E-01 | 1.00E+00 | -0.51 | 3.26E-03 | 2.19E-01 |
| <b>NCOA7</b>     | 0.00  | 9.98E-01 | 1.00E+00 | 0.96  | 3.28E-03 | 2.20E-01 |
| <b>PDE6G</b>     | -3.30 | 3.03E-03 | 2.89E-01 | 1.68  | 3.29E-03 | 2.20E-01 |
| <b>SHISAL1</b>   | 0.24  | 6.63E-01 | 1.00E+00 | 2.42  | 3.32E-03 | 2.22E-01 |
| <b>IGKV4-1</b>   | 6.71  | 2.34E-02 | 9.15E-01 | 3.51  | 3.33E-03 | 2.22E-01 |
| <b>SCNN1D</b>    | -1.20 | 6.82E-02 | 1.00E+00 | 3.41  | 3.37E-03 | 2.24E-01 |
| <b>RPS15AP17</b> | 4.56  | 1.74E-01 | 1.00E+00 | -2.54 | 3.38E-03 | 2.24E-01 |
| <b>CLEC2D</b>    | 0.02  | 9.76E-01 | 1.00E+00 | 1.50  | 3.39E-03 | 2.24E-01 |
| <b>SIAH1</b>     | 0.13  | 6.06E-01 | 1.00E+00 | -1.08 | 3.41E-03 | 2.25E-01 |
| <b>IGF2BP3</b>   | -0.96 | 5.18E-01 | 1.00E+00 | 2.84  | 3.44E-03 | 2.26E-01 |
| <b>ALDH2</b>     | 0.50  | 7.10E-02 | 1.00E+00 | -0.59 | 3.45E-03 | 2.26E-01 |
| <b>VWFP1</b>     | 2.93  | 1.60E-02 | 7.91E-01 | 2.11  | 3.47E-03 | 2.26E-01 |
| <b>LINC02421</b> | 0.26  | 9.40E-01 | 1.00E+00 | -5.50 | 3.48E-03 | 2.26E-01 |
| <b>RPLP0P2</b>   | -0.84 | 4.82E-01 | 1.00E+00 | 1.60  | 3.49E-03 | 2.26E-01 |
| <b>RPS2P7</b>    | -1.29 | 2.98E-01 | 1.00E+00 | -1.97 | 3.51E-03 | 2.26E-01 |
| <b>U62317.1</b>  | 1.10  | 7.38E-01 | 1.00E+00 | 2.39  | 3.51E-03 | 2.26E-01 |
| <b>HLA-F</b>     | -0.09 | 8.17E-01 | 1.00E+00 | 1.16  | 3.53E-03 | 2.26E-01 |
| <b>RALYL</b>     | -1.26 | 7.16E-01 | 1.00E+00 | -4.96 | 3.53E-03 | 2.26E-01 |
| <b>CLEC7A</b>    | -1.10 | 1.68E-01 | 1.00E+00 | 1.59  | 3.54E-03 | 2.26E-01 |
| <b>SDHAF4</b>    | 0.09  | 7.50E-01 | 1.00E+00 | -0.67 | 3.55E-03 | 2.26E-01 |

|             |       |          |          |       |          |          |
|-------------|-------|----------|----------|-------|----------|----------|
| PQLC2L      | 0.84  | 2.91E-01 | 1.00E+00 | -1.82 | 3.55E-03 | 2.26E-01 |
| AC107956.1  | -1.96 | 2.85E-01 | 1.00E+00 | -3.28 | 3.55E-03 | 2.26E-01 |
| P3H3        | -0.13 | 7.36E-01 | 1.00E+00 | 1.69  | 3.56E-03 | 2.26E-01 |
| BGN         | -0.21 | 6.72E-01 | 1.00E+00 | 1.44  | 3.56E-03 | 2.26E-01 |
| AL031847.1  | -1.23 | 7.24E-01 | 1.00E+00 | -4.00 | 3.58E-03 | 2.26E-01 |
| BRSK1       | -1.12 | 9.64E-02 | 1.00E+00 | 2.53  | 3.60E-03 | 2.26E-01 |
| CST3        | 0.12  | 6.94E-01 | 1.00E+00 | 0.76  | 3.61E-03 | 2.26E-01 |
| XLOC_005405 | -1.47 | 6.70E-01 | 1.00E+00 | -3.41 | 3.61E-03 | 2.26E-01 |
| SCGB2B2     | -0.94 | 3.68E-01 | 1.00E+00 | -1.92 | 3.61E-03 | 2.26E-01 |
| AMDHD2      | -0.18 | 5.20E-01 | 1.00E+00 | 0.83  | 3.62E-03 | 2.26E-01 |
| MUC5B       | -1.88 | 4.86E-02 | 1.00E+00 | 4.08  | 3.63E-03 | 2.26E-01 |
| FNBP1P1     | -0.08 | 9.18E-01 | 1.00E+00 | -1.84 | 3.64E-03 | 2.26E-01 |
| TMEM86A     | 0.24  | 6.38E-01 | 1.00E+00 | 1.14  | 3.66E-03 | 2.26E-01 |
| EIF3C       | -0.44 | 1.06E-01 | 1.00E+00 | -0.71 | 3.68E-03 | 2.27E-01 |
| LY6E        | 0.16  | 7.75E-01 | 1.00E+00 | 1.23  | 3.68E-03 | 2.27E-01 |
| DRD4        | 0.28  | 7.01E-01 | 1.00E+00 | 3.50  | 3.71E-03 | 2.27E-01 |
| IGHV1-3     | -0.50 | 8.54E-01 | 1.00E+00 | 4.13  | 3.72E-03 | 2.27E-01 |
| CDH12       | -0.51 | 3.66E-01 | 1.00E+00 | -1.91 | 3.72E-03 | 2.27E-01 |
| PLAU        | -0.30 | 5.78E-01 | 1.00E+00 | 1.13  | 3.72E-03 | 2.27E-01 |
| IGKV2-29    | 3.87  | 2.51E-01 | 1.00E+00 | 6.29  | 3.75E-03 | 2.27E-01 |
| FADS2       | 0.88  | 2.61E-01 | 1.00E+00 | -2.27 | 3.75E-03 | 2.27E-01 |
| POLR3G      | -0.08 | 8.23E-01 | 1.00E+00 | 1.23  | 3.76E-03 | 2.27E-01 |
| MSTN        | -1.83 | 2.10E-01 | 1.00E+00 | -2.89 | 3.77E-03 | 2.27E-01 |
| COL1A2      | 0.83  | 4.70E-01 | 1.00E+00 | 1.77  | 3.78E-03 | 2.27E-01 |
| ACOT4       | 0.55  | 4.90E-01 | 1.00E+00 | -1.27 | 3.78E-03 | 2.27E-01 |
| KCNJ6       | 0.22  | 9.49E-01 | 1.00E+00 | 4.13  | 3.79E-03 | 2.27E-01 |
| HES5        | 0.66  | 2.25E-01 | 1.00E+00 | -2.76 | 3.80E-03 | 2.27E-01 |
| KRT16P2     | -3.42 | 1.06E-02 | 6.36E-01 | 2.58  | 3.80E-03 | 2.27E-01 |
| ANKRD1      | -1.96 | 5.61E-01 | 1.00E+00 | 3.43  | 3.83E-03 | 2.27E-01 |
| G40988      | -0.35 | 4.78E-01 | 1.00E+00 | 1.28  | 3.83E-03 | 2.27E-01 |
| IL7R        | 0.43  | 5.10E-01 | 1.00E+00 | 2.67  | 3.85E-03 | 2.28E-01 |
| AL031316.1  | 0.06  | 9.85E-01 | 1.00E+00 | -2.55 | 3.85E-03 | 2.28E-01 |

|                   |       |          |          |       |          |          |
|-------------------|-------|----------|----------|-------|----------|----------|
| <b>PTGER2</b>     | 0.35  | 4.14E-01 | 1.00E+00 | 1.35  | 3.91E-03 | 2.30E-01 |
| <b>METTL21EP</b>  | 0.57  | 8.33E-01 | 1.00E+00 | -4.04 | 3.91E-03 | 2.30E-01 |
| <b>AC011008.2</b> | 0.04  | 9.68E-01 | 1.00E+00 | -3.16 | 3.98E-03 | 2.32E-01 |
| <b>ANKLE1</b>     | 0.82  | 5.67E-01 | 1.00E+00 | 1.73  | 3.98E-03 | 2.32E-01 |
| <b>PLA2G4C</b>    | 0.66  | 2.13E-01 | 1.00E+00 | 1.37  | 3.98E-03 | 2.32E-01 |
| <b>PRSS23</b>     | -0.15 | 7.18E-01 | 1.00E+00 | 1.15  | 3.99E-03 | 2.32E-01 |
| <b>GALNT1</b>     | 0.39  | 2.71E-01 | 1.00E+00 | -1.27 | 4.04E-03 | 2.35E-01 |
| <b>RBM26-AS1</b>  | -1.35 | 1.59E-01 | 1.00E+00 | -1.67 | 4.06E-03 | 2.35E-01 |
| <b>PRKY</b>       | 0.68  | 3.30E-01 | 1.00E+00 | 3.47  | 4.07E-03 | 2.35E-01 |
| <b>QSOX1</b>      | -0.09 | 7.18E-01 | 1.00E+00 | 1.27  | 4.09E-03 | 2.35E-01 |
| <b>SULT1C2</b>    | 1.83  | 2.88E-01 | 1.00E+00 | 3.69  | 4.09E-03 | 2.35E-01 |
| <b>SMIM18</b>     | -1.24 | 7.19E-01 | 1.00E+00 | 2.32  | 4.10E-03 | 2.35E-01 |
| <b>BX284668.5</b> | -0.79 | 3.03E-01 | 1.00E+00 | -1.59 | 4.10E-03 | 2.35E-01 |
| <b>CRISP3</b>     | -0.04 | 9.76E-01 | 1.00E+00 | -2.37 | 4.13E-03 | 2.36E-01 |
| <b>TLR2</b>       | 0.15  | 7.18E-01 | 1.00E+00 | 1.69  | 4.16E-03 | 2.37E-01 |
| <b>HIST1H2BJ</b>  | -0.54 | 5.39E-01 | 1.00E+00 | 1.54  | 4.17E-03 | 2.37E-01 |
| <b>PCDH17</b>     | -0.41 | 4.48E-01 | 1.00E+00 | 1.94  | 4.18E-03 | 2.37E-01 |
| <b>HAS2</b>       | 0.42  | 2.77E-01 | 1.00E+00 | 1.29  | 4.20E-03 | 2.38E-01 |
| <b>FAIM2</b>      | 0.25  | 7.91E-01 | 1.00E+00 | 1.41  | 4.24E-03 | 2.39E-01 |
| <b>AL121790.1</b> | -0.09 | 9.66E-01 | 1.00E+00 | -3.02 | 4.24E-03 | 2.39E-01 |
| <b>UPP1</b>       | -0.14 | 7.35E-01 | 1.00E+00 | 1.36  | 4.26E-03 | 2.39E-01 |
| <b>IGHV3-64</b>   | NA    | NA       | NA       | 5.84  | 4.26E-03 | 2.39E-01 |
| <b>DDTL</b>       | 0.29  | 6.98E-01 | 1.00E+00 | 1.46  | 4.27E-03 | 2.39E-01 |
| <b>KCNJ1</b>      | 0.35  | 7.78E-01 | 1.00E+00 | 3.13  | 4.27E-03 | 2.39E-01 |
| <b>EEF1A1P4</b>   | -1.04 | 5.95E-01 | 1.00E+00 | -1.65 | 4.28E-03 | 2.39E-01 |
| <b>THEMIS2</b>    | 0.53  | 2.30E-01 | 1.00E+00 | 1.92  | 4.30E-03 | 2.39E-01 |
| <b>AC020928.1</b> | -2.53 | 1.81E-01 | 1.00E+00 | -4.58 | 4.32E-03 | 2.39E-01 |
| <b>COL3A1</b>     | 1.28  | 3.83E-01 | 1.00E+00 | 1.93  | 4.32E-03 | 2.39E-01 |
| <b>ALOX5</b>      | -0.71 | 1.77E-01 | 1.00E+00 | 1.48  | 4.34E-03 | 2.40E-01 |
| <b>EEF1A1P6</b>   | -0.01 | 9.75E-01 | 1.00E+00 | -0.59 | 4.37E-03 | 2.40E-01 |
| <b>CERCAM</b>     | 0.39  | 5.58E-01 | 1.00E+00 | 1.55  | 4.38E-03 | 2.41E-01 |
| <b>CD33</b>       | -0.19 | 6.85E-01 | 1.00E+00 | 1.49  | 4.40E-03 | 2.41E-01 |

|             |       |          |          |       |          |          |
|-------------|-------|----------|----------|-------|----------|----------|
| HERC5       | 0.23  | 6.98E-01 | 1.00E+00 | 1.59  | 4.43E-03 | 2.42E-01 |
| NT5C3A      | 0.01  | 9.67E-01 | 1.00E+00 | 0.73  | 4.45E-03 | 2.42E-01 |
| PLD4        | -0.37 | 5.00E-01 | 1.00E+00 | 1.93  | 4.45E-03 | 2.42E-01 |
| AC090236.2  | NA    | NA       | NA       | -5.13 | 4.49E-03 | 2.42E-01 |
| XLOC_005595 | -0.37 | 5.00E-01 | 1.00E+00 | -1.17 | 4.49E-03 | 2.42E-01 |
| GJB2        | -0.41 | 2.87E-01 | 1.00E+00 | 2.07  | 4.49E-03 | 2.42E-01 |
| MUC21       | 1.03  | 6.03E-01 | 1.00E+00 | -5.06 | 4.53E-03 | 2.42E-01 |
| CDH22       | -0.65 | 6.38E-02 | 1.00E+00 | -2.30 | 4.54E-03 | 2.42E-01 |
| KRT20       | -3.85 | 2.14E-02 | 8.94E-01 | -4.45 | 4.54E-03 | 2.42E-01 |
| AC138207.5  | 0.69  | 2.52E-01 | 1.00E+00 | 2.05  | 4.54E-03 | 2.42E-01 |
| HIST1H1C    | -0.01 | 9.69E-01 | 1.00E+00 | -0.95 | 4.55E-03 | 2.42E-01 |
| AL109613.1  | 0.45  | 7.18E-01 | 1.00E+00 | 2.10  | 4.55E-03 | 2.42E-01 |
| LINC02544   | -3.01 | 9.13E-02 | 1.00E+00 | 2.53  | 4.56E-03 | 2.42E-01 |
| ZNF396      | 0.11  | 7.83E-01 | 1.00E+00 | -1.61 | 4.56E-03 | 2.42E-01 |
| AL583722.1  | 0.92  | 3.58E-01 | 1.00E+00 | 3.65  | 4.58E-03 | 2.43E-01 |
| PRB1        | -1.82 | 1.11E-01 | 1.00E+00 | -2.71 | 4.59E-03 | 2.43E-01 |
| LMAN2L      | 0.20  | 3.97E-01 | 1.00E+00 | -0.80 | 4.61E-03 | 2.43E-01 |
| AC004069.1  | 0.68  | 8.04E-01 | 1.00E+00 | -2.63 | 4.62E-03 | 2.43E-01 |
| AP000925.1  | 0.01  | 9.98E-01 | 1.00E+00 | 4.18  | 4.62E-03 | 2.43E-01 |
| RNU1-60P    | 0.32  | 7.53E-01 | 1.00E+00 | -2.07 | 4.65E-03 | 2.44E-01 |
| MIR635      | 0.94  | 2.91E-01 | 1.00E+00 | 2.88  | 4.68E-03 | 2.45E-01 |
| TSLP        | 1.17  | 6.85E-02 | 1.00E+00 | 1.22  | 4.69E-03 | 2.45E-01 |
| SLC7A7      | 0.35  | 4.27E-01 | 1.00E+00 | 1.87  | 4.70E-03 | 2.45E-01 |
| OR1N1       | NA    | NA       | NA       | -4.38 | 4.72E-03 | 2.45E-01 |
| MPG         | -0.20 | 4.12E-01 | 1.00E+00 | 0.59  | 4.76E-03 | 2.47E-01 |
| VMO1        | -0.07 | 8.56E-01 | 1.00E+00 | 1.38  | 4.80E-03 | 2.48E-01 |
| NTN1        | 0.35  | 4.06E-01 | 1.00E+00 | 2.49  | 4.82E-03 | 2.49E-01 |
| TPTE2P5     | -0.06 | 9.66E-01 | 1.00E+00 | -2.49 | 4.84E-03 | 2.50E-01 |
| FNTA        | 0.19  | 2.99E-01 | 1.00E+00 | -1.00 | 4.86E-03 | 2.50E-01 |
| XLOC_000600 | 0.68  | 6.90E-01 | 1.00E+00 | -3.07 | 4.88E-03 | 2.50E-01 |
| AC093908.1  | -0.20 | 7.55E-01 | 1.00E+00 | 1.99  | 4.88E-03 | 2.50E-01 |
| G36296      | -3.52 | 7.35E-02 | 1.00E+00 | 2.06  | 4.91E-03 | 2.51E-01 |

|                   |       |          |          |       |          |          |
|-------------------|-------|----------|----------|-------|----------|----------|
| <b>PBRM1</b>      | -0.05 | 8.47E-01 | 1.00E+00 | -0.84 | 4.91E-03 | 2.51E-01 |
| <b>LGMN</b>       | 0.29  | 3.79E-01 | 1.00E+00 | 1.00  | 4.92E-03 | 2.51E-01 |
| <b>SIRPB2</b>     | -0.01 | 9.87E-01 | 1.00E+00 | 1.91  | 4.94E-03 | 2.51E-01 |
| <b>AC239799.1</b> | -0.65 | 4.34E-01 | 1.00E+00 | 1.39  | 4.95E-03 | 2.51E-01 |
| <b>ENC1</b>       | -0.45 | 2.96E-01 | 1.00E+00 | 1.41  | 4.95E-03 | 2.51E-01 |
| <b>AC012313.8</b> | 0.09  | 9.14E-01 | 1.00E+00 | -3.48 | 5.00E-03 | 2.53E-01 |
| <b>MAPKAPK2</b>   | -0.04 | 8.05E-01 | 1.00E+00 | 1.75  | 5.05E-03 | 2.54E-01 |
| <b>AC090517.5</b> | 0.18  | 7.89E-01 | 1.00E+00 | -0.99 | 5.06E-03 | 2.54E-01 |
| <b>AP003680.1</b> | -0.06 | 9.86E-01 | 1.00E+00 | -4.65 | 5.07E-03 | 2.54E-01 |
| <b>AL132780.2</b> | 0.22  | 6.77E-01 | 1.00E+00 | -1.33 | 5.08E-03 | 2.54E-01 |
| <b>FRZB</b>       | -0.54 | 3.37E-01 | 1.00E+00 | -1.10 | 5.08E-03 | 2.54E-01 |
| <b>ZHX1</b>       | -0.02 | 9.17E-01 | 1.00E+00 | -0.45 | 5.12E-03 | 2.55E-01 |
| <b>WAS</b>        | -0.70 | 1.31E-01 | 1.00E+00 | 1.97  | 5.20E-03 | 2.58E-01 |
| <b>TIMP1</b>      | 0.09  | 8.33E-01 | 1.00E+00 | 1.02  | 5.20E-03 | 2.58E-01 |
| <b>MT1G</b>       | -0.46 | 2.79E-01 | 1.00E+00 | -1.52 | 5.21E-03 | 2.58E-01 |
| <b>TRPM2</b>      | 0.23  | 7.01E-01 | 1.00E+00 | 2.57  | 5.21E-03 | 2.58E-01 |
| <b>LINC00996</b>  | -0.61 | 7.71E-01 | 1.00E+00 | 3.97  | 5.23E-03 | 2.58E-01 |
| <b>AC107032.2</b> | -0.41 | 6.53E-01 | 1.00E+00 | -1.58 | 5.28E-03 | 2.60E-01 |
| <b>AC104237.2</b> | 2.62  | 1.19E-01 | 1.00E+00 | -4.29 | 5.30E-03 | 2.61E-01 |
| <b>TRIM52-AS1</b> | -0.29 | 3.27E-01 | 1.00E+00 | -0.93 | 5.34E-03 | 2.62E-01 |
| <b>G42895</b>     | -0.13 | 8.83E-01 | 1.00E+00 | -2.93 | 5.35E-03 | 2.62E-01 |
| <b>TTC33</b>      | 0.32  | 3.32E-01 | 1.00E+00 | -1.02 | 5.42E-03 | 2.65E-01 |
| <b>TOMM20L</b>    | -0.28 | 7.78E-01 | 1.00E+00 | -2.12 | 5.43E-03 | 2.65E-01 |
| <b>PTAFR</b>      | -0.34 | 3.13E-01 | 1.00E+00 | 1.76  | 5.47E-03 | 2.66E-01 |
| <b>AC138474.1</b> | -0.92 | 5.77E-01 | 1.00E+00 | -3.28 | 5.53E-03 | 2.69E-01 |
| <b>MTATP8P1</b>   | -1.26 | 7.13E-01 | 1.00E+00 | -2.63 | 5.54E-03 | 2.69E-01 |
| <b>KATNAL2</b>    | -0.23 | 6.64E-01 | 1.00E+00 | -1.68 | 5.56E-03 | 2.69E-01 |
| <b>Z99129.3</b>   | -0.80 | 8.18E-01 | 1.00E+00 | -4.06 | 5.60E-03 | 2.70E-01 |
| <b>AC004233.2</b> | 0.56  | 6.74E-01 | 1.00E+00 | -3.75 | 5.60E-03 | 2.70E-01 |
| <b>HTR2A</b>      | -0.56 | 5.27E-01 | 1.00E+00 | 1.81  | 5.62E-03 | 2.70E-01 |
| <b>SPCS2P4</b>    | -0.35 | 4.27E-01 | 1.00E+00 | -1.16 | 5.62E-03 | 2.70E-01 |
| <b>SPATA31D5P</b> | -0.05 | 9.88E-01 | 1.00E+00 | -2.11 | 5.65E-03 | 2.70E-01 |

|                    |       |          |          |       |          |          |
|--------------------|-------|----------|----------|-------|----------|----------|
| <b>SYNGAP1</b>     | -0.63 | 4.73E-02 | 1.00E+00 | 2.34  | 5.67E-03 | 2.70E-01 |
| <b>LINC02156</b>   | 0.56  | 8.71E-01 | 1.00E+00 | 4.02  | 5.67E-03 | 2.70E-01 |
| <b>OLFML3</b>      | 0.61  | 2.24E-01 | 1.00E+00 | 1.24  | 5.68E-03 | 2.70E-01 |
| <b>IFITM1</b>      | 0.24  | 6.41E-01 | 1.00E+00 | 1.21  | 5.69E-03 | 2.70E-01 |
| <b>AC046158.1</b>  | 1.13  | 7.44E-01 | 1.00E+00 | -4.09 | 5.70E-03 | 2.70E-01 |
| <b>SLC2A9</b>      | -0.36 | 2.73E-01 | 1.00E+00 | 0.89  | 5.70E-03 | 2.70E-01 |
| <b>LCP2</b>        | 0.26  | 5.72E-01 | 1.00E+00 | 1.58  | 5.73E-03 | 2.70E-01 |
| <b>MXD1</b>        | 0.05  | 8.95E-01 | 1.00E+00 | 0.87  | 5.73E-03 | 2.70E-01 |
| <b>AC008972.2</b>  | -0.05 | 9.66E-01 | 1.00E+00 | 1.99  | 5.73E-03 | 2.70E-01 |
| <b>ISG20</b>       | -0.49 | 4.00E-01 | 1.00E+00 | 1.64  | 5.75E-03 | 2.71E-01 |
| <b>LINC01152</b>   | 0.56  | 5.69E-01 | 1.00E+00 | -2.24 | 5.77E-03 | 2.71E-01 |
| <b>GK-IT1</b>      | 0.56  | 8.71E-01 | 1.00E+00 | 4.41  | 5.81E-03 | 2.72E-01 |
| <b>SULF1</b>       | -0.28 | 5.74E-01 | 1.00E+00 | 1.68  | 5.83E-03 | 2.72E-01 |
| <b>COL4A4</b>      | -1.48 | 1.33E-02 | 7.22E-01 | 2.96  | 5.85E-03 | 2.72E-01 |
| <b>PAQR3</b>       | 0.24  | 3.88E-01 | 1.00E+00 | -1.10 | 5.86E-03 | 2.72E-01 |
| <b>LINC00871</b>   | 0.59  | 5.45E-01 | 1.00E+00 | -3.83 | 5.86E-03 | 2.72E-01 |
| <b>AC187652.1</b>  | -1.19 | 2.21E-01 | 1.00E+00 | 3.71  | 5.87E-03 | 2.72E-01 |
| <b>AL390037.1</b>  | -0.79 | 8.13E-01 | 1.00E+00 | -3.69 | 5.90E-03 | 2.73E-01 |
| <b>CHN1</b>        | -0.64 | 3.11E-01 | 1.00E+00 | 1.62  | 5.94E-03 | 2.74E-01 |
| <b>NEXMIF</b>      | -0.86 | 8.12E-03 | 5.56E-01 | -1.68 | 5.94E-03 | 2.74E-01 |
| <b>PRSS22</b>      | -0.28 | 6.29E-01 | 1.00E+00 | 2.44  | 5.99E-03 | 2.76E-01 |
| <b>DLGAP1-AS5</b>  | -0.91 | 5.12E-01 | 1.00E+00 | -3.52 | 6.01E-03 | 2.76E-01 |
| <b>XLOC_000916</b> | 0.33  | 7.82E-01 | 1.00E+00 | -2.85 | 6.03E-03 | 2.77E-01 |
| <b>MNDA</b>        | -0.13 | 8.05E-01 | 1.00E+00 | 1.19  | 6.04E-03 | 2.77E-01 |
| <b>SLC47A1</b>     | -0.36 | 1.78E-01 | 1.00E+00 | -0.98 | 6.07E-03 | 2.77E-01 |
| <b>BMP8A</b>       | 0.32  | 7.82E-01 | 1.00E+00 | 3.87  | 6.17E-03 | 2.82E-01 |
| <b>H19</b>         | 1.24  | 1.32E-02 | 7.22E-01 | 1.55  | 6.22E-03 | 2.83E-01 |
| <b>TTYH3</b>       | -0.77 | 9.66E-03 | 6.09E-01 | 2.13  | 6.22E-03 | 2.83E-01 |
| <b>AKR1B10</b>     | -0.98 | 1.71E-02 | 8.25E-01 | 2.06  | 6.24E-03 | 2.83E-01 |
| <b>RNU2-64P</b>    | NA    | NA       | NA       | -3.04 | 6.24E-03 | 2.83E-01 |
| <b>IRAK1BP1</b>    | -0.23 | 2.90E-01 | 1.00E+00 | -0.95 | 6.26E-03 | 2.83E-01 |
| <b>AC010168.1</b>  | 0.44  | 5.77E-01 | 1.00E+00 | -2.20 | 6.30E-03 | 2.84E-01 |

|                    |        |          |          |       |          |          |
|--------------------|--------|----------|----------|-------|----------|----------|
| <b>IGKV2D-30</b>   | 3.66   | 5.54E-02 | 1.00E+00 | 3.82  | 6.38E-03 | 2.87E-01 |
| <b>HLA-V</b>       | 0.03   | 9.74E-01 | 1.00E+00 | 1.35  | 6.40E-03 | 2.87E-01 |
| <b>SGCA</b>        | 0.64   | 3.12E-01 | 1.00E+00 | 1.44  | 6.40E-03 | 2.87E-01 |
| <b>ACADL</b>       | 0.34   | 3.50E-01 | 1.00E+00 | -1.62 | 6.44E-03 | 2.87E-01 |
| <b>MGST1</b>       | 2.40   | 3.37E-02 | 1.00E+00 | -1.84 | 6.45E-03 | 2.87E-01 |
| <b>AC007608.4</b>  | 1.44   | 4.13E-01 | 1.00E+00 | -3.47 | 6.46E-03 | 2.87E-01 |
| <b>ADAM23</b>      | -0.47  | 3.68E-01 | 1.00E+00 | 2.15  | 6.47E-03 | 2.87E-01 |
| <b>TMSB4XP8</b>    | -0.15  | 6.23E-01 | 1.00E+00 | -1.15 | 6.48E-03 | 2.87E-01 |
| <b>HSD17B1</b>     | -0.40  | 1.58E-01 | 1.00E+00 | -1.52 | 6.49E-03 | 2.87E-01 |
| <b>PROSER2-AS1</b> | -0.19  | 7.86E-01 | 1.00E+00 | -2.04 | 6.50E-03 | 2.87E-01 |
| <b>OLFML2B</b>     | -0.26  | 6.06E-01 | 1.00E+00 | 1.87  | 6.51E-03 | 2.87E-01 |
| <b>CREB3L1</b>     | 0.11   | 8.50E-01 | 1.00E+00 | 1.31  | 6.52E-03 | 2.87E-01 |
| <b>FAM173B</b>     | 0.12   | 7.17E-01 | 1.00E+00 | -0.96 | 6.52E-03 | 2.87E-01 |
| <b>CMPK1</b>       | 0.10   | 5.98E-01 | 1.00E+00 | -0.66 | 6.55E-03 | 2.88E-01 |
| <b>TENM3</b>       | 0.95   | 2.02E-01 | 1.00E+00 | 2.10  | 6.57E-03 | 2.89E-01 |
| <b>ITGAM</b>       | 0.10   | 8.38E-01 | 1.00E+00 | 2.16  | 6.64E-03 | 2.91E-01 |
| <b>C1QB</b>        | 0.34   | 5.45E-01 | 1.00E+00 | 1.93  | 6.65E-03 | 2.91E-01 |
| <b>TNFAIP8L2</b>   | -0.44  | 5.29E-01 | 1.00E+00 | 1.33  | 6.71E-03 | 2.92E-01 |
| <b>RP1</b>         | -0.44  | 6.49E-01 | 1.00E+00 | -2.34 | 6.71E-03 | 2.92E-01 |
| <b>KRT37</b>       | -2.12  | 1.69E-01 | 1.00E+00 | 3.69  | 6.72E-03 | 2.92E-01 |
| <b>ZNF683</b>      | -0.02  | 9.88E-01 | 1.00E+00 | 2.64  | 6.75E-03 | 2.93E-01 |
| <b>RNU2-63P</b>    | -10.56 | 2.06E-03 | 2.39E-01 | -2.58 | 6.76E-03 | 2.93E-01 |
| <b>RBFOX2</b>      | 0.15   | 6.59E-01 | 1.00E+00 | 0.42  | 6.79E-03 | 2.93E-01 |
| <b>XLOC_007053</b> | -2.22  | 3.25E-01 | 1.00E+00 | 1.66  | 6.79E-03 | 2.93E-01 |
| <b>IGKJ5</b>       | NA     | NA       | NA       | 4.76  | 6.80E-03 | 2.93E-01 |
| <b>HMG2N2P6</b>    | -1.02  | 7.65E-01 | 1.00E+00 | -1.73 | 6.81E-03 | 2.93E-01 |
| <b>SCAMP5</b>      | 0.91   | 2.42E-01 | 1.00E+00 | 1.98  | 6.86E-03 | 2.94E-01 |
| <b>AC005696.4</b>  | -0.62  | 1.86E-01 | 1.00E+00 | -2.48 | 6.87E-03 | 2.94E-01 |
| <b>FOLH1B</b>      | -1.60  | 6.41E-01 | 1.00E+00 | 2.94  | 6.87E-03 | 2.94E-01 |
| <b>STEAP1B</b>     | -0.76  | 2.02E-01 | 1.00E+00 | 1.70  | 6.87E-03 | 2.94E-01 |
| <b>MCUR1</b>       | 0.13   | 7.03E-01 | 1.00E+00 | -0.73 | 6.88E-03 | 2.94E-01 |
| <b>MYO1G</b>       | -0.55  | 2.58E-01 | 1.00E+00 | 2.37  | 6.91E-03 | 2.94E-01 |

|                    |       |          |          |       |          |          |
|--------------------|-------|----------|----------|-------|----------|----------|
| <b>AC009950.1</b>  | 0.45  | 5.86E-01 | 1.00E+00 | 1.50  | 6.92E-03 | 2.95E-01 |
| <b>CASP4</b>       | -0.18 | 5.10E-01 | 1.00E+00 | 0.74  | 6.95E-03 | 2.95E-01 |
| <b>PCOLCE</b>      | 0.32  | 5.91E-01 | 1.00E+00 | 1.43  | 7.01E-03 | 2.97E-01 |
| <b>ZNF471</b>      | 0.40  | 2.90E-01 | 1.00E+00 | -1.49 | 7.02E-03 | 2.97E-01 |
| <b>SCD</b>         | 1.04  | 7.44E-01 | 1.00E+00 | -2.16 | 7.02E-03 | 2.97E-01 |
| <b>AC241584.1</b>  | -1.38 | 6.85E-01 | 1.00E+00 | -2.87 | 7.07E-03 | 2.97E-01 |
| <b>EFCAB11</b>     | 0.04  | 9.01E-01 | 1.00E+00 | -0.67 | 7.08E-03 | 2.97E-01 |
| <b>DNAJC27-AS1</b> | 0.15  | 7.33E-01 | 1.00E+00 | -1.13 | 7.09E-03 | 2.97E-01 |
| <b>TAGAP</b>       | 0.32  | 4.78E-01 | 1.00E+00 | 1.65  | 7.12E-03 | 2.97E-01 |
| <b>AL356056.1</b>  | NA    | NA       | NA       | 3.19  | 7.12E-03 | 2.97E-01 |
| <b>C16orf54</b>    | -0.03 | 9.67E-01 | 1.00E+00 | 1.50  | 7.12E-03 | 2.97E-01 |
| <b>YBX3</b>        | -0.09 | 7.61E-01 | 1.00E+00 | -1.44 | 7.13E-03 | 2.97E-01 |
| <b>CD300A</b>      | -0.22 | 5.79E-01 | 1.00E+00 | 1.46  | 7.18E-03 | 2.99E-01 |
| <b>AC006511.3</b>  | 0.20  | 8.51E-01 | 1.00E+00 | -1.78 | 7.22E-03 | 2.99E-01 |
| <b>AC009902.3</b>  | 2.95  | 7.53E-02 | 1.00E+00 | -3.26 | 7.23E-03 | 2.99E-01 |
| <b>LYPD1</b>       | -0.46 | 6.46E-01 | 1.00E+00 | 3.05  | 7.23E-03 | 2.99E-01 |
| <b>AVL9</b>        | 0.09  | 6.31E-01 | 1.00E+00 | 0.75  | 7.26E-03 | 2.99E-01 |
| <b>KLK12</b>       | -0.27 | 9.04E-01 | 1.00E+00 | 2.60  | 7.27E-03 | 2.99E-01 |
| <b>TF</b>          | 2.32  | 1.38E-01 | 1.00E+00 | -2.26 | 7.28E-03 | 2.99E-01 |
| <b>AC068282.1</b>  | -2.39 | 1.93E-02 | 8.74E-01 | -1.42 | 7.29E-03 | 2.99E-01 |
| <b>AC012618.3</b>  | -1.87 | 4.74E-01 | 1.00E+00 | 2.52  | 7.29E-03 | 2.99E-01 |
| <b>THBS2</b>       | 0.03  | 9.31E-01 | 1.00E+00 | 0.84  | 7.31E-03 | 2.99E-01 |
| <b>SMIM22</b>      | 2.84  | 2.23E-02 | 8.98E-01 | -1.87 | 7.31E-03 | 2.99E-01 |
| <b>CCDC91</b>      | -0.10 | 6.43E-01 | 1.00E+00 | -0.65 | 7.31E-03 | 2.99E-01 |
| <b>RNU5A-1</b>     | -2.88 | 2.90E-01 | 1.00E+00 | -2.22 | 7.35E-03 | 3.00E-01 |
| <b>PPIAP59</b>     | 0.65  | 7.76E-01 | 1.00E+00 | 2.87  | 7.36E-03 | 3.00E-01 |
| <b>MVB12A</b>      | -0.29 | 2.40E-01 | 1.00E+00 | 0.31  | 7.37E-03 | 3.00E-01 |
| <b>CTSL</b>        | 0.16  | 6.80E-01 | 1.00E+00 | 1.37  | 7.41E-03 | 3.01E-01 |
| <b>AL139156.2</b>  | -0.35 | 7.05E-01 | 1.00E+00 | -1.37 | 7.43E-03 | 3.01E-01 |
| <b>CCL11</b>       | -1.39 | 6.89E-01 | 1.00E+00 | 3.41  | 7.44E-03 | 3.01E-01 |
| <b>AL359317.2</b>  | 0.53  | 5.90E-01 | 1.00E+00 | -2.29 | 7.48E-03 | 3.02E-01 |
| <b>RGS4</b>        | -1.43 | 1.72E-01 | 1.00E+00 | 3.07  | 7.48E-03 | 3.02E-01 |



|                          |       |          |          |       |          |          |
|--------------------------|-------|----------|----------|-------|----------|----------|
| <b>AEN</b>               | -0.56 | 9.25E-02 | 1.00E+00 | 1.34  | 7.50E-03 | 3.02E-01 |
| <b>RN7SL138P</b>         | -0.80 | 4.97E-01 | 1.00E+00 | 1.86  | 7.51E-03 | 3.02E-01 |
| <b>PTK7</b>              | -0.10 | 7.15E-01 | 1.00E+00 | 1.34  | 7.52E-03 | 3.02E-01 |
| <b>MIR5689HG</b>         | 0.98  | 7.78E-01 | 1.00E+00 | 3.87  | 7.54E-03 | 3.02E-01 |
| <b>LY9</b>               | 0.18  | 8.04E-01 | 1.00E+00 | 2.07  | 7.55E-03 | 3.02E-01 |
| <b>ADIPOR2</b>           | 0.43  | 1.01E-01 | 1.00E+00 | 0.89  | 7.56E-03 | 3.02E-01 |
| <b>MIR181A1HG</b>        | NA    | NA       | NA       | 3.04  | 7.60E-03 | 3.03E-01 |
| <b>AC108673.2</b>        | -0.89 | 3.13E-01 | 1.00E+00 | 3.37  | 7.62E-03 | 3.03E-01 |
| <b>ZSCAN16-AS1</b>       | 0.51  | 4.60E-01 | 1.00E+00 | -1.12 | 7.62E-03 | 3.03E-01 |
| <b>TRAF3IP2</b>          | -0.09 | 7.04E-01 | 1.00E+00 | 0.57  | 7.64E-03 | 3.04E-01 |
| <b>AL121672.2</b>        | 1.39  | 2.72E-01 | 1.00E+00 | -2.69 | 7.66E-03 | 3.04E-01 |
| <b>B3GAT1</b>            | 0.17  | 9.46E-01 | 1.00E+00 | 3.41  | 7.68E-03 | 3.04E-01 |
| <b>PTPN1</b>             | -0.07 | 7.53E-01 | 1.00E+00 | 0.92  | 7.76E-03 | 3.06E-01 |
| <b>C1QA</b>              | 0.20  | 6.78E-01 | 1.00E+00 | 1.74  | 7.76E-03 | 3.06E-01 |
| <b>SHMT1</b>             | -0.06 | 8.09E-01 | 1.00E+00 | -0.86 | 7.84E-03 | 3.08E-01 |
| <b>DUXAP10</b>           | -0.63 | 4.16E-01 | 1.00E+00 | 2.28  | 7.84E-03 | 3.08E-01 |
| <b>GKAP1</b>             | 0.08  | 8.55E-01 | 1.00E+00 | -1.67 | 7.87E-03 | 3.09E-01 |
| <b>GPR183</b>            | -1.03 | 1.31E-01 | 1.00E+00 | 1.22  | 7.94E-03 | 3.11E-01 |
| <b>AL034376.1</b>        | -2.51 | 2.45E-02 | 9.24E-01 | 1.99  | 7.99E-03 | 3.13E-01 |
| <b>G30347</b>            | -1.36 | 5.86E-02 | 1.00E+00 | 3.40  | 8.02E-03 | 3.13E-01 |
| <b>NARS2</b>             | 0.05  | 7.83E-01 | 1.00E+00 | -0.76 | 8.03E-03 | 3.13E-01 |
| <b>G25302</b>            | -3.09 | 1.74E-03 | 2.31E-01 | -3.13 | 8.04E-03 | 3.13E-01 |
| <b>GAL</b>               | 0.15  | 9.25E-01 | 1.00E+00 | -2.63 | 8.07E-03 | 3.14E-01 |
| <b>AC083829.2</b>        | 0.43  | 9.03E-01 | 1.00E+00 | -2.66 | 8.13E-03 | 3.15E-01 |
| <b>TIMD4</b>             | -0.12 | 9.17E-01 | 1.00E+00 | 2.19  | 8.14E-03 | 3.15E-01 |
| <b>TYROBP</b>            | -0.29 | 4.74E-01 | 1.00E+00 | 1.31  | 8.15E-03 | 3.15E-01 |
| <b>LRRC37A</b>           | 0.42  | 4.75E-01 | 1.00E+00 | 1.04  | 8.20E-03 | 3.16E-01 |
| <b>PLD3</b>              | -0.14 | 6.00E-01 | 1.00E+00 | 1.06  | 8.20E-03 | 3.16E-01 |
| <b>PAX6</b>              | -0.49 | 5.57E-01 | 1.00E+00 | -2.40 | 8.20E-03 | 3.16E-01 |
| <b>G39617</b>            | -0.97 | 6.36E-01 | 1.00E+00 | -2.36 | 8.25E-03 | 3.18E-01 |
| <b>LINC02446</b>         | -1.24 | 3.80E-01 | 1.00E+00 | 3.70  | 8.29E-03 | 3.18E-01 |
| <b>LL22NC03-N14H11.1</b> | 2.34  | 1.80E-01 | 1.00E+00 | 4.30  | 8.31E-03 | 3.19E-01 |

|                     |       |          |          |       |          |          |
|---------------------|-------|----------|----------|-------|----------|----------|
| <b>RAD51-AS1</b>    | 0.77  | 9.20E-02 | 1.00E+00 | -1.05 | 8.36E-03 | 3.20E-01 |
| <b>RPL9P29</b>      | -0.24 | 8.91E-01 | 1.00E+00 | 2.95  | 8.37E-03 | 3.20E-01 |
| <b>NLGN4X</b>       | 0.21  | 5.11E-01 | 1.00E+00 | 1.52  | 8.39E-03 | 3.20E-01 |
| <b>AL357833.1</b>   | 1.32  | 1.55E-01 | 1.00E+00 | 1.93  | 8.39E-03 | 3.20E-01 |
| <b>ADAMTS16</b>     | -1.75 | 1.60E-01 | 1.00E+00 | 2.91  | 8.45E-03 | 3.21E-01 |
| <b>AC105094.1</b>   | -0.18 | 8.68E-01 | 1.00E+00 | -2.16 | 8.46E-03 | 3.21E-01 |
| <b>RTP4</b>         | -0.41 | 6.19E-01 | 1.00E+00 | 1.63  | 8.47E-03 | 3.21E-01 |
| <b>WNT5A</b>        | -0.61 | 4.45E-02 | 1.00E+00 | 1.62  | 8.50E-03 | 3.21E-01 |
| <b>TYW1B</b>        | 2.01  | 5.73E-03 | 4.50E-01 | 1.24  | 8.51E-03 | 3.21E-01 |
| <b>ADA2</b>         | -0.39 | 2.55E-01 | 1.00E+00 | 1.60  | 8.54E-03 | 3.21E-01 |
| <b>POC1B-AS1</b>    | 0.03  | 9.56E-01 | 1.00E+00 | -1.06 | 8.54E-03 | 3.21E-01 |
| <b>EFNA3</b>        | -0.06 | 8.99E-01 | 1.00E+00 | -1.42 | 8.54E-03 | 3.21E-01 |
| <b>MC5R</b>         | 0.29  | 7.83E-01 | 1.00E+00 | -3.15 | 8.58E-03 | 3.21E-01 |
| <b>IGSF5</b>        | -0.89 | 4.17E-01 | 1.00E+00 | -2.55 | 8.59E-03 | 3.21E-01 |
| <b>EYA2</b>         | 0.08  | 8.83E-01 | 1.00E+00 | 1.18  | 8.60E-03 | 3.21E-01 |
| <b>ZNF565</b>       | -0.20 | 5.89E-01 | 1.00E+00 | -0.87 | 8.61E-03 | 3.21E-01 |
| <b>CCDC62</b>       | -0.23 | 7.70E-01 | 1.00E+00 | -2.42 | 8.64E-03 | 3.21E-01 |
| <b>LGALS3BP</b>     | 0.13  | 8.34E-01 | 1.00E+00 | 1.31  | 8.64E-03 | 3.21E-01 |
| <b>PLA2G5</b>       | 0.91  | 1.40E-01 | 1.00E+00 | 1.55  | 8.65E-03 | 3.21E-01 |
| <b>CTD-2328D6.1</b> | 0.06  | 8.49E-01 | 1.00E+00 | -1.69 | 8.67E-03 | 3.21E-01 |
| <b>AC018638.7</b>   | 2.98  | 3.78E-01 | 1.00E+00 | 5.70  | 8.67E-03 | 3.21E-01 |
| <b>EPSTI1</b>       | -0.22 | 7.61E-01 | 1.00E+00 | 1.80  | 8.67E-03 | 3.21E-01 |
| <b>CEP70</b>        | -0.03 | 9.16E-01 | 1.00E+00 | -0.75 | 8.68E-03 | 3.21E-01 |
| <b>B4GALT5</b>      | 0.39  | 2.08E-01 | 1.00E+00 | 1.50  | 8.72E-03 | 3.22E-01 |
| <b>FAM53B-AS1</b>   | 1.44  | 6.73E-01 | 1.00E+00 | -3.91 | 8.74E-03 | 3.23E-01 |
| <b>FCGR3A</b>       | -0.55 | 3.75E-01 | 1.00E+00 | 2.31  | 8.78E-03 | 3.23E-01 |
| <b>IGKV1D-27</b>    | 1.43  | 6.78E-01 | 1.00E+00 | 4.09  | 8.78E-03 | 3.23E-01 |
| <b>IL10</b>         | 0.06  | 9.48E-01 | 1.00E+00 | 2.21  | 8.79E-03 | 3.23E-01 |
| <b>AL109628.1</b>   | NA    | NA       | NA       | -3.42 | 8.83E-03 | 3.24E-01 |
| <b>AP005717.1</b>   | -3.62 | 2.83E-01 | 1.00E+00 | -3.82 | 8.86E-03 | 3.24E-01 |
| <b>XLOC_011805</b>  | 0.55  | 7.73E-01 | 1.00E+00 | -3.64 | 8.86E-03 | 3.24E-01 |
| <b>LATS2</b>        | -0.16 | 5.16E-01 | 1.00E+00 | 1.24  | 8.95E-03 | 3.27E-01 |

|                    |       |          |          |       |          |          |
|--------------------|-------|----------|----------|-------|----------|----------|
| <b>RIN2</b>        | -0.18 | 2.78E-01 | 1.00E+00 | 0.65  | 8.98E-03 | 3.27E-01 |
| <b>GATC</b>        | 0.08  | 7.57E-01 | 1.00E+00 | -0.49 | 8.99E-03 | 3.27E-01 |
| <b>G38234</b>      | -0.80 | 6.75E-01 | 1.00E+00 | -3.12 | 9.04E-03 | 3.28E-01 |
| <b>ACP2</b>        | 0.01  | 9.59E-01 | 1.00E+00 | 0.80  | 9.06E-03 | 3.28E-01 |
| <b>COL5A3</b>      | -0.62 | 2.55E-02 | 9.29E-01 | 1.90  | 9.08E-03 | 3.28E-01 |
| <b>MAP4K5</b>      | 0.07  | 8.23E-01 | 1.00E+00 | -0.59 | 9.08E-03 | 3.28E-01 |
| <b>AC011473.4</b>  | -0.45 | 4.82E-01 | 1.00E+00 | 1.70  | 9.09E-03 | 3.28E-01 |
| <b>KPNA2</b>       | 0.04  | 8.77E-01 | 1.00E+00 | 0.57  | 9.09E-03 | 3.28E-01 |
| <b>C5AR1</b>       | 0.34  | 4.18E-01 | 1.00E+00 | 1.92  | 9.12E-03 | 3.28E-01 |
| <b>C1QL4</b>       | 0.00  | 9.97E-01 | 1.00E+00 | -3.11 | 9.14E-03 | 3.28E-01 |
| <b>SZRD1</b>       | -0.01 | 9.38E-01 | 1.00E+00 | 0.66  | 9.14E-03 | 3.28E-01 |
| <b>LINC01203</b>   | -1.93 | 5.74E-01 | 1.00E+00 | -3.92 | 9.15E-03 | 3.28E-01 |
| <b>TRBV7-6</b>     | 4.10  | 1.04E-01 | 1.00E+00 | 2.26  | 9.16E-03 | 3.28E-01 |
| <b>AP001024.1</b>  | -2.04 | 5.52E-01 | 1.00E+00 | -2.16 | 9.20E-03 | 3.29E-01 |
| <b>TFP1</b>        | 1.97  | 2.73E-01 | 1.00E+00 | -3.49 | 9.20E-03 | 3.29E-01 |
| <b>KRT6A</b>       | -0.57 | 2.13E-01 | 1.00E+00 | 2.48  | 9.26E-03 | 3.29E-01 |
| <b>CATSPER2</b>    | -0.15 | 8.14E-01 | 1.00E+00 | -1.18 | 9.27E-03 | 3.29E-01 |
| <b>AL109917.1</b>  | 0.00  | 9.95E-01 | 1.00E+00 | -2.19 | 9.27E-03 | 3.29E-01 |
| <b>SLFNL1-AS1</b>  | 2.59  | 8.72E-02 | 1.00E+00 | 2.34  | 9.27E-03 | 3.29E-01 |
| <b>CCDC3</b>       | -0.41 | 1.30E-01 | 1.00E+00 | -1.10 | 9.28E-03 | 3.29E-01 |
| <b>CCDC28B</b>     | -0.25 | 6.35E-01 | 1.00E+00 | 0.84  | 9.28E-03 | 3.29E-01 |
| <b>AC093157.1</b>  | -0.67 | 1.49E-01 | 1.00E+00 | -1.10 | 9.31E-03 | 3.29E-01 |
| <b>AC068733.3</b>  | 1.63  | 1.85E-01 | 1.00E+00 | -2.43 | 9.32E-03 | 3.29E-01 |
| <b>STARD3</b>      | -0.02 | 9.01E-01 | 1.00E+00 | 0.43  | 9.35E-03 | 3.30E-01 |
| <b>STAB1</b>       | 0.24  | 6.36E-01 | 1.00E+00 | 1.87  | 9.39E-03 | 3.30E-01 |
| <b>C1orf162</b>    | -0.46 | 1.99E-01 | 1.00E+00 | 1.11  | 9.41E-03 | 3.30E-01 |
| <b>LCE3C</b>       | 0.00  | 1.00E+00 | 1.00E+00 | 3.72  | 9.41E-03 | 3.30E-01 |
| <b>LIPC</b>        | 0.89  | 6.30E-02 | 1.00E+00 | 1.40  | 9.43E-03 | 3.31E-01 |
| <b>AL356056.2</b>  | 0.08  | 9.07E-01 | 1.00E+00 | 1.60  | 9.46E-03 | 3.31E-01 |
| <b>XLOC_008786</b> | 0.22  | 8.94E-01 | 1.00E+00 | -3.51 | 9.49E-03 | 3.32E-01 |
| <b>YBX1P2</b>      | -0.05 | 9.59E-01 | 1.00E+00 | -0.81 | 9.53E-03 | 3.32E-01 |
| <b>PTPRO</b>       | -0.04 | 9.60E-01 | 1.00E+00 | 2.87  | 9.53E-03 | 3.32E-01 |

|            |       |          |          |       |          |          |
|------------|-------|----------|----------|-------|----------|----------|
| LIMD2      | -0.51 | 1.57E-01 | 1.00E+00 | 1.47  | 9.54E-03 | 3.32E-01 |
| CXCL3      | -1.50 | 2.56E-01 | 1.00E+00 | 2.45  | 9.56E-03 | 3.32E-01 |
| 10-Sep     | 0.13  | 3.73E-01 | 1.00E+00 | -0.37 | 9.59E-03 | 3.32E-01 |
| G20080     | -1.80 | 4.42E-01 | 1.00E+00 | 3.78  | 9.59E-03 | 3.32E-01 |
| LONRF1     | 0.39  | 2.53E-01 | 1.00E+00 | -0.98 | 9.61E-03 | 3.32E-01 |
| EIF1AXP1   | 0.46  | 3.45E-01 | 1.00E+00 | -0.85 | 9.61E-03 | 3.32E-01 |
| PLXND1     | 0.07  | 8.63E-01 | 1.00E+00 | 1.94  | 9.65E-03 | 3.33E-01 |
| IL4I1      | -1.21 | 1.13E-01 | 1.00E+00 | 2.34  | 9.66E-03 | 3.33E-01 |
| AC099066.2 | -0.20 | 9.02E-01 | 1.00E+00 | 1.99  | 9.69E-03 | 3.33E-01 |
| MX2        | -0.04 | 9.59E-01 | 1.00E+00 | 1.93  | 9.72E-03 | 3.34E-01 |
| PPP1R9B    | -0.46 | 6.99E-02 | 1.00E+00 | 1.90  | 9.77E-03 | 3.35E-01 |
| FBXO25     | 0.10  | 5.41E-01 | 1.00E+00 | -0.46 | 9.77E-03 | 3.35E-01 |
| WBP2NL     | -0.39 | 6.31E-01 | 1.00E+00 | -1.51 | 9.81E-03 | 3.36E-01 |
| COPZ2      | 0.01  | 9.72E-01 | 1.00E+00 | -1.72 | 9.82E-03 | 3.36E-01 |
| HELZ2      | -0.40 | 4.80E-01 | 1.00E+00 | 2.25  | 9.87E-03 | 3.36E-01 |
| P3H1       | -0.19 | 6.28E-01 | 1.00E+00 | 1.06  | 9.87E-03 | 3.36E-01 |
| AP003392.4 | -0.47 | 2.59E-01 | 1.00E+00 | -1.21 | 9.88E-03 | 3.36E-01 |
| RPRML      | 0.76  | 5.08E-01 | 1.00E+00 | -2.10 | 9.90E-03 | 3.36E-01 |
| PGRMC2     | 0.06  | 8.31E-01 | 1.00E+00 | -0.95 | 9.91E-03 | 3.36E-01 |
| AP003774.3 | -0.16 | 9.62E-01 | 1.00E+00 | 4.47  | 9.92E-03 | 3.36E-01 |
| TSTD3      | -0.19 | 7.45E-01 | 1.00E+00 | -1.18 | 9.94E-03 | 3.36E-01 |
| FAM20A     | -0.02 | 9.69E-01 | 1.00E+00 | 1.91  | 9.95E-03 | 3.36E-01 |
| CCL5       | -1.34 | 4.21E-02 | 1.00E+00 | 1.82  | 9.97E-03 | 3.36E-01 |
| DLSTP1     | -0.45 | 8.42E-01 | 1.00E+00 | 1.88  | 9.99E-03 | 3.36E-01 |
| TRAV30     | 1.33  | 6.99E-01 | 1.00E+00 | 3.65  | 1.00E-02 | 3.36E-01 |
| LST1       | -0.92 | 4.06E-02 | 1.00E+00 | 0.92  | 1.00E-02 | 3.36E-01 |
| IFITM3     | 0.27  | 5.94E-01 | 1.00E+00 | 0.93  | 1.00E-02 | 3.36E-01 |
| MRC2       | 0.30  | 5.13E-01 | 1.00E+00 | 1.66  | 1.00E-02 | 3.37E-01 |
| RPTN       | -0.43 | 5.79E-01 | 1.00E+00 | 2.18  | 1.01E-02 | 3.38E-01 |
| RRP7BP     | -0.46 | 3.38E-01 | 1.00E+00 | 1.14  | 1.01E-02 | 3.38E-01 |
| RASSF3     | 0.53  | 3.25E-01 | 1.00E+00 | 1.30  | 1.01E-02 | 3.38E-01 |
| G33755     | -1.65 | 6.32E-01 | 1.00E+00 | 3.85  | 1.01E-02 | 3.38E-01 |

|            |       |          |          |       |          |          |
|------------|-------|----------|----------|-------|----------|----------|
| ZBTB37     | 0.11  | 7.07E-01 | 1.00E+00 | 0.47  | 1.02E-02 | 3.38E-01 |
| ARRB2      | -0.29 | 1.80E-01 | 1.00E+00 | 1.09  | 1.02E-02 | 3.39E-01 |
| PFN1P8     | 0.76  | 6.83E-01 | 1.00E+00 | -2.99 | 1.02E-02 | 3.39E-01 |
| NMI        | -0.29 | 5.47E-01 | 1.00E+00 | 0.79  | 1.03E-02 | 3.39E-01 |
| FBXO10     | -0.02 | 9.57E-01 | 1.00E+00 | 1.16  | 1.03E-02 | 3.39E-01 |
| ENOPH1     | 0.00  | 9.99E-01 | 1.00E+00 | -0.29 | 1.03E-02 | 3.39E-01 |
| TLR7       | -0.28 | 6.06E-01 | 1.00E+00 | 2.22  | 1.03E-02 | 3.39E-01 |
| SLC36A1    | 0.06  | 7.98E-01 | 1.00E+00 | 1.10  | 1.03E-02 | 3.39E-01 |
| CXCR4      | 0.18  | 6.48E-01 | 1.00E+00 | 1.82  | 1.03E-02 | 3.39E-01 |
| PLXDC1     | -0.13 | 7.44E-01 | 1.00E+00 | 1.31  | 1.03E-02 | 3.39E-01 |
| AC022167.3 | -2.19 | 3.48E-01 | 1.00E+00 | -2.20 | 1.03E-02 | 3.39E-01 |
| RNU4-2     | -0.17 | 8.89E-01 | 1.00E+00 | -2.43 | 1.03E-02 | 3.39E-01 |
| NSRP1P1    | 0.88  | 3.19E-01 | 1.00E+00 | 1.42  | 1.04E-02 | 3.40E-01 |
| HIST1H1D   | -0.71 | 4.48E-01 | 1.00E+00 | -2.02 | 1.04E-02 | 3.40E-01 |
| CASP16P    | -1.76 | 2.32E-01 | 1.00E+00 | 3.22  | 1.04E-02 | 3.40E-01 |
| LIMK1      | -0.23 | 3.75E-01 | 1.00E+00 | 1.74  | 1.04E-02 | 3.40E-01 |
| AGRN       | -0.07 | 8.22E-01 | 1.00E+00 | 2.04  | 1.06E-02 | 3.45E-01 |
| SIGLEC1    | 0.70  | 2.19E-01 | 1.00E+00 | 2.31  | 1.06E-02 | 3.46E-01 |
| AL161457.2 | -1.86 | 5.37E-01 | 1.00E+00 | -2.07 | 1.06E-02 | 3.46E-01 |
| NGF-AS1    | 1.98  | 4.79E-01 | 1.00E+00 | 3.38  | 1.07E-02 | 3.46E-01 |
| FNDC3A     | 0.17  | 5.22E-01 | 1.00E+00 | 0.56  | 1.07E-02 | 3.46E-01 |
| CNPY3      | -0.04 | 8.80E-01 | 1.00E+00 | 0.73  | 1.07E-02 | 3.46E-01 |
| IGKV1-33   | 0.93  | 6.15E-01 | 1.00E+00 | 3.63  | 1.07E-02 | 3.46E-01 |
| AC092171.2 | -0.12 | 7.85E-01 | 1.00E+00 | 1.15  | 1.07E-02 | 3.46E-01 |
| GDF11      | -0.24 | 5.71E-01 | 1.00E+00 | 1.27  | 1.08E-02 | 3.48E-01 |
| AL162412.1 | 1.27  | 5.02E-01 | 1.00E+00 | -3.63 | 1.08E-02 | 3.48E-01 |
| TTC19      | 0.05  | 7.80E-01 | 1.00E+00 | -1.33 | 1.08E-02 | 3.48E-01 |
| DDX3Y      | 0.91  | 2.83E-01 | 1.00E+00 | 2.78  | 1.09E-02 | 3.50E-01 |
| LAMA5-AS1  | -1.00 | 7.53E-01 | 1.00E+00 | -2.72 | 1.09E-02 | 3.50E-01 |
| FBXL4      | 0.19  | 5.87E-01 | 1.00E+00 | -0.53 | 1.09E-02 | 3.50E-01 |
| PRMT8      | -1.86 | 3.07E-01 | 1.00E+00 | 2.81  | 1.09E-02 | 3.50E-01 |
| FRA10AC1   | 0.32  | 2.92E-01 | 1.00E+00 | -0.85 | 1.09E-02 | 3.50E-01 |

|                   |       |          |          |       |          |          |
|-------------------|-------|----------|----------|-------|----------|----------|
| <b>KRT16P1</b>    | -1.13 | 6.02E-01 | 1.00E+00 | 1.81  | 1.10E-02 | 3.50E-01 |
| <b>AL157829.1</b> | -2.50 | 1.93E-01 | 1.00E+00 | 2.91  | 1.10E-02 | 3.50E-01 |
| <b>DNAJC5</b>     | 0.01  | 9.64E-01 | 1.00E+00 | 1.23  | 1.10E-02 | 3.50E-01 |
| <b>FAM172A</b>    | 0.36  | 1.81E-01 | 1.00E+00 | -0.70 | 1.11E-02 | 3.51E-01 |
| <b>GALK1</b>      | -0.03 | 8.59E-01 | 1.00E+00 | 0.63  | 1.11E-02 | 3.51E-01 |
| <b>LAMC2</b>      | 0.22  | 4.40E-01 | 1.00E+00 | 1.05  | 1.11E-02 | 3.52E-01 |
| <b>SCT</b>        | -2.90 | 3.45E-01 | 1.00E+00 | 3.70  | 1.11E-02 | 3.53E-01 |
| <b>BMP1</b>       | -0.44 | 1.40E-01 | 1.00E+00 | 1.67  | 1.12E-02 | 3.53E-01 |
| <b>KRT4</b>       | 2.27  | 6.45E-02 | 1.00E+00 | 2.43  | 1.12E-02 | 3.53E-01 |
| <b>ARMC10</b>     | 0.25  | 2.97E-01 | 1.00E+00 | -1.50 | 1.12E-02 | 3.53E-01 |
| <b>CALR4P</b>     | -0.80 | 8.18E-01 | 1.00E+00 | -4.20 | 1.13E-02 | 3.53E-01 |
| <b>CFP</b>        | -0.03 | 9.49E-01 | 1.00E+00 | 1.45  | 1.13E-02 | 3.53E-01 |
| <b>AC002429.2</b> | -1.59 | 5.17E-01 | 1.00E+00 | -3.98 | 1.13E-02 | 3.53E-01 |
| <b>BTF3L4P2</b>   | 0.61  | 4.38E-01 | 1.00E+00 | -1.11 | 1.13E-02 | 3.53E-01 |
| <b>HIST2H2AC</b>  | -0.24 | 8.11E-01 | 1.00E+00 | -1.35 | 1.13E-02 | 3.53E-01 |
| <b>CTSS</b>       | 0.00  | 9.90E-01 | 1.00E+00 | 1.40  | 1.13E-02 | 3.53E-01 |
| <b>CYP19A1</b>    | -0.17 | 7.74E-01 | 1.00E+00 | 2.06  | 1.13E-02 | 3.54E-01 |
| <b>GRIA1</b>      | -1.18 | 1.90E-01 | 1.00E+00 | 2.11  | 1.13E-02 | 3.54E-01 |
| <b>ITGB3BP</b>    | -0.41 | 2.03E-01 | 1.00E+00 | -0.85 | 1.14E-02 | 3.54E-01 |
| <b>ERVMER61-1</b> | 2.43  | 4.64E-02 | 1.00E+00 | -2.71 | 1.14E-02 | 3.54E-01 |
| <b>RELT</b>       | -0.43 | 2.75E-01 | 1.00E+00 | 1.68  | 1.14E-02 | 3.54E-01 |
| <b>SIRPAP1</b>    | -0.39 | 8.99E-01 | 1.00E+00 | -2.68 | 1.14E-02 | 3.54E-01 |
| <b>AC008147.3</b> | 1.39  | 2.06E-01 | 1.00E+00 | 2.24  | 1.14E-02 | 3.54E-01 |
| <b>ARNT2</b>      | -0.38 | 4.55E-01 | 1.00E+00 | 1.45  | 1.14E-02 | 3.54E-01 |
| <b>AP001627.1</b> | 1.35  | 2.62E-01 | 1.00E+00 | -2.72 | 1.14E-02 | 3.54E-01 |
| <b>FCGR1B</b>     | -1.21 | 3.48E-01 | 1.00E+00 | 2.33  | 1.14E-02 | 3.54E-01 |
| <b>LINC01615</b>  | -0.22 | 6.52E-01 | 1.00E+00 | 1.44  | 1.15E-02 | 3.54E-01 |
| <b>SIGLEC8</b>    | 1.71  | 1.08E-01 | 1.00E+00 | 2.75  | 1.15E-02 | 3.54E-01 |
| <b>AL157700.1</b> | -1.11 | 4.99E-01 | 1.00E+00 | -2.74 | 1.15E-02 | 3.54E-01 |
| <b>LINC01305</b>  | -0.34 | 7.33E-01 | 1.00E+00 | 2.53  | 1.15E-02 | 3.54E-01 |
| <b>AL158212.5</b> | 0.59  | 3.93E-01 | 1.00E+00 | 1.87  | 1.16E-02 | 3.55E-01 |
| <b>G10489</b>     | -0.91 | 2.39E-01 | 1.00E+00 | -3.46 | 1.16E-02 | 3.55E-01 |

|            |       |          |          |       |          |          |
|------------|-------|----------|----------|-------|----------|----------|
| HIBADH     | 0.39  | 3.21E-01 | 1.00E+00 | -0.91 | 1.16E-02 | 3.55E-01 |
| AC018755.4 | 0.32  | 7.98E-01 | 1.00E+00 | 2.54  | 1.16E-02 | 3.55E-01 |
| GCSH       | 0.86  | 4.30E-01 | 1.00E+00 | -1.20 | 1.16E-02 | 3.55E-01 |
| PKD1L3     | -1.93 | 4.48E-01 | 1.00E+00 | 2.73  | 1.17E-02 | 3.55E-01 |
| LINC01002  | -0.93 | 4.31E-01 | 1.00E+00 | 2.81  | 1.17E-02 | 3.55E-01 |
| SP110      | -0.14 | 7.71E-01 | 1.00E+00 | 1.00  | 1.17E-02 | 3.55E-01 |
| MT-TE      | NA    | NA       | NA       | -4.50 | 1.17E-02 | 3.55E-01 |
| KCP        | 0.42  | 5.38E-01 | 1.00E+00 | 1.88  | 1.17E-02 | 3.55E-01 |
| AL355353.1 | -0.86 | 1.68E-01 | 1.00E+00 | -1.39 | 1.17E-02 | 3.55E-01 |
| EPHA5      | -1.03 | 1.14E-01 | 1.00E+00 | -2.79 | 1.18E-02 | 3.55E-01 |
| PAX5       | -2.30 | 4.82E-01 | 1.00E+00 | 2.36  | 1.18E-02 | 3.55E-01 |
| AC015910.1 | 0.56  | 5.86E-01 | 1.00E+00 | -2.00 | 1.18E-02 | 3.55E-01 |
| CD180      | 0.58  | 5.83E-01 | 1.00E+00 | 2.43  | 1.18E-02 | 3.55E-01 |
| SLC26A7    | 0.15  | 8.80E-01 | 1.00E+00 | -2.14 | 1.18E-02 | 3.55E-01 |
| CBX6       | 0.06  | 8.77E-01 | 1.00E+00 | 0.66  | 1.18E-02 | 3.55E-01 |
| PODNL1     | 0.05  | 9.00E-01 | 1.00E+00 | 1.19  | 1.18E-02 | 3.55E-01 |
| SYCP3      | -1.22 | 5.66E-01 | 1.00E+00 | -2.06 | 1.18E-02 | 3.55E-01 |
| OAS1       | 0.48  | 5.40E-01 | 1.00E+00 | 1.41  | 1.18E-02 | 3.55E-01 |
| MXI1       | 0.07  | 7.91E-01 | 1.00E+00 | -0.88 | 1.19E-02 | 3.55E-01 |
| SMPD1      | -0.09 | 7.26E-01 | 1.00E+00 | 0.79  | 1.19E-02 | 3.55E-01 |
| LINC02386  | -3.00 | 1.21E-01 | 1.00E+00 | -3.63 | 1.19E-02 | 3.55E-01 |
| AC009093.1 | -1.79 | 1.20E-01 | 1.00E+00 | 1.60  | 1.19E-02 | 3.55E-01 |
| IGLC7      | 1.76  | 6.07E-01 | 1.00E+00 | 3.03  | 1.19E-02 | 3.55E-01 |
| CYP3A5     | 1.00  | 1.14E-01 | 1.00E+00 | 1.54  | 1.20E-02 | 3.56E-01 |
| STXBP5L    | -1.65 | 1.60E-01 | 1.00E+00 | -3.38 | 1.20E-02 | 3.56E-01 |
| TTC6       | 0.51  | 7.81E-01 | 1.00E+00 | -2.55 | 1.20E-02 | 3.56E-01 |
| AC036176.1 | -0.04 | 9.54E-01 | 1.00E+00 | -1.14 | 1.20E-02 | 3.57E-01 |
| SLC7A4     | -0.12 | 7.89E-01 | 1.00E+00 | -1.54 | 1.21E-02 | 3.58E-01 |
| CDC42P6    | 2.78  | 2.07E-02 | 8.94E-01 | 1.30  | 1.22E-02 | 3.59E-01 |
| COX6CP1    | 0.56  | 8.71E-01 | 1.00E+00 | 2.44  | 1.22E-02 | 3.59E-01 |
| BICC1      | 0.31  | 4.94E-01 | 1.00E+00 | 0.93  | 1.22E-02 | 3.59E-01 |
| NACC1      | -0.18 | 5.96E-01 | 1.00E+00 | 2.03  | 1.22E-02 | 3.61E-01 |

|             |       |          |          |       |          |          |
|-------------|-------|----------|----------|-------|----------|----------|
| MARCKS      | -0.03 | 8.64E-01 | 1.00E+00 | 0.83  | 1.23E-02 | 3.61E-01 |
| AL353807.3  | 0.44  | 5.43E-01 | 1.00E+00 | 1.33  | 1.23E-02 | 3.62E-01 |
| CCL4L2      | 0.71  | 8.09E-01 | 1.00E+00 | 3.38  | 1.23E-02 | 3.62E-01 |
| ARMC9       | 0.28  | 2.47E-01 | 1.00E+00 | 0.84  | 1.23E-02 | 3.62E-01 |
| CRAT37      | -1.24 | 7.19E-01 | 1.00E+00 | 4.98  | 1.24E-02 | 3.62E-01 |
| OR7E13P     | NA    | NA       | NA       | -3.92 | 1.24E-02 | 3.62E-01 |
| MDM2        | 0.07  | 7.78E-01 | 1.00E+00 | 0.50  | 1.24E-02 | 3.62E-01 |
| AL137186.2  | 0.35  | 6.95E-01 | 1.00E+00 | 1.37  | 1.24E-02 | 3.62E-01 |
| DBP         | -0.97 | 6.76E-03 | 4.99E-01 | -1.47 | 1.25E-02 | 3.63E-01 |
| ZNF747      | -0.02 | 9.52E-01 | 1.00E+00 | -0.68 | 1.26E-02 | 3.66E-01 |
| IFIT1B      | -2.44 | 2.96E-01 | 1.00E+00 | 3.86  | 1.26E-02 | 3.66E-01 |
| SLC16A1     | -0.14 | 6.62E-01 | 1.00E+00 | 0.61  | 1.26E-02 | 3.66E-01 |
| SNX3        | 0.10  | 5.31E-01 | 1.00E+00 | -0.97 | 1.26E-02 | 3.67E-01 |
| AC011330.1  | 0.40  | 7.91E-01 | 1.00E+00 | -2.69 | 1.27E-02 | 3.68E-01 |
| NCF2        | 0.27  | 3.79E-01 | 1.00E+00 | 1.06  | 1.27E-02 | 3.68E-01 |
| LRRC4       | -0.54 | 3.31E-01 | 1.00E+00 | 2.24  | 1.27E-02 | 3.68E-01 |
| ISLR        | 0.76  | 9.21E-02 | 1.00E+00 | 1.11  | 1.27E-02 | 3.68E-01 |
| NPFFR2      | -0.51 | 6.32E-01 | 1.00E+00 | 2.92  | 1.28E-02 | 3.68E-01 |
| LENG1       | 0.04  | 8.56E-01 | 1.00E+00 | 0.75  | 1.28E-02 | 3.68E-01 |
| NCF4        | -0.09 | 7.82E-01 | 1.00E+00 | 1.24  | 1.28E-02 | 3.68E-01 |
| ADH7        | -0.74 | 3.68E-01 | 1.00E+00 | 1.89  | 1.28E-02 | 3.69E-01 |
| ACSS2       | 0.26  | 4.34E-01 | 1.00E+00 | -0.98 | 1.29E-02 | 3.69E-01 |
| S1PR2       | 0.20  | 5.13E-01 | 1.00E+00 | 0.80  | 1.29E-02 | 3.69E-01 |
| PDGFA       | -0.58 | 2.21E-02 | 8.96E-01 | 1.07  | 1.29E-02 | 3.69E-01 |
| HEPHL1      | -1.00 | 6.71E-01 | 1.00E+00 | 2.42  | 1.29E-02 | 3.70E-01 |
| DCAF4L1     | -1.32 | 6.98E-01 | 1.00E+00 | -3.00 | 1.29E-02 | 3.70E-01 |
| SORCS2      | 0.07  | 8.96E-01 | 1.00E+00 | 2.29  | 1.29E-02 | 3.70E-01 |
| BLK         | -2.28 | 1.67E-01 | 1.00E+00 | 3.78  | 1.30E-02 | 3.70E-01 |
| AL845321.1  | -0.79 | 6.96E-01 | 1.00E+00 | -3.58 | 1.30E-02 | 3.71E-01 |
| XLOC_000992 | 1.01  | 1.45E-01 | 1.00E+00 | -1.94 | 1.30E-02 | 3.71E-01 |
| SNF8        | -0.24 | 2.77E-01 | 1.00E+00 | -1.13 | 1.31E-02 | 3.72E-01 |
| SND1-IT1    | -1.95 | 4.05E-01 | 1.00E+00 | -2.31 | 1.31E-02 | 3.72E-01 |



|                    |       |          |          |       |          |          |
|--------------------|-------|----------|----------|-------|----------|----------|
| <b>CTSK</b>        | 0.46  | 3.16E-01 | 1.00E+00 | 1.06  | 1.31E-02 | 3.72E-01 |
| <b>TRGC1</b>       | 0.44  | 7.68E-01 | 1.00E+00 | 2.64  | 1.31E-02 | 3.72E-01 |
| <b>G14986</b>      | -0.79 | 5.92E-01 | 1.00E+00 | -3.29 | 1.32E-02 | 3.72E-01 |
| <b>DKK4</b>        | -2.40 | 5.83E-02 | 1.00E+00 | -3.07 | 1.32E-02 | 3.72E-01 |
| <b>AL355312.3</b>  | 0.35  | 9.19E-01 | 1.00E+00 | 2.33  | 1.32E-02 | 3.72E-01 |
| <b>MCCC1</b>       | 0.18  | 4.59E-01 | 1.00E+00 | -0.62 | 1.32E-02 | 3.72E-01 |
| <b>AC080013.1</b>  | -0.39 | 6.28E-01 | 1.00E+00 | -1.83 | 1.32E-02 | 3.72E-01 |
| <b>CPZ</b>         | 0.76  | 7.99E-01 | 1.00E+00 | 2.54  | 1.32E-02 | 3.73E-01 |
| <b>TRIM38</b>      | -0.09 | 8.08E-01 | 1.00E+00 | 0.69  | 1.33E-02 | 3.73E-01 |
| <b>AC093227.1</b>  | -0.08 | 9.07E-01 | 1.00E+00 | -1.33 | 1.33E-02 | 3.73E-01 |
| <b>CASR</b>        | -2.97 | 2.79E-01 | 1.00E+00 | 3.85  | 1.33E-02 | 3.73E-01 |
| <b>PECR</b>        | 1.22  | 8.50E-02 | 1.00E+00 | -1.27 | 1.33E-02 | 3.73E-01 |
| <b>AC007389.5</b>  | -0.07 | 9.59E-01 | 1.00E+00 | -2.23 | 1.34E-02 | 3.74E-01 |
| <b>RTCA-AS1</b>    | 0.20  | 7.64E-01 | 1.00E+00 | -1.09 | 1.34E-02 | 3.76E-01 |
| <b>SNX18</b>       | 0.00  | 9.79E-01 | 1.00E+00 | 1.01  | 1.35E-02 | 3.76E-01 |
| <b>FBLIM1</b>      | -0.44 | 2.13E-01 | 1.00E+00 | 1.22  | 1.35E-02 | 3.76E-01 |
| <b>CBWD3</b>       | 0.08  | 8.55E-01 | 1.00E+00 | -0.95 | 1.35E-02 | 3.76E-01 |
| <b>CD4</b>         | -0.01 | 9.87E-01 | 1.00E+00 | 1.25  | 1.35E-02 | 3.76E-01 |
| <b>AC100872.1</b>  | -2.62 | 1.88E-01 | 1.00E+00 | -3.63 | 1.35E-02 | 3.76E-01 |
| <b>HPR</b>         | 2.74  | 1.01E-01 | 1.00E+00 | 2.76  | 1.36E-02 | 3.77E-01 |
| <b>PCDHGB9P</b>    | -2.35 | 2.07E-01 | 1.00E+00 | 3.04  | 1.36E-02 | 3.77E-01 |
| <b>CYTH4</b>       | -0.04 | 9.31E-01 | 1.00E+00 | 1.82  | 1.36E-02 | 3.77E-01 |
| <b>RIPOR3</b>      | 0.67  | 1.93E-01 | 1.00E+00 | 2.26  | 1.36E-02 | 3.77E-01 |
| <b>AC009237.14</b> | 0.02  | 9.71E-01 | 1.00E+00 | -1.42 | 1.37E-02 | 3.77E-01 |
| <b>AC069307.1</b>  | 1.32  | 2.00E-01 | 1.00E+00 | -1.85 | 1.37E-02 | 3.77E-01 |
| <b>ASIP</b>        | -0.15 | 8.33E-01 | 1.00E+00 | 1.16  | 1.38E-02 | 3.79E-01 |
| <b>ACOX1</b>       | 0.39  | 2.42E-02 | 9.19E-01 | -0.33 | 1.38E-02 | 3.79E-01 |
| <b>SPTLC2</b>      | 0.04  | 8.62E-01 | 1.00E+00 | 0.60  | 1.38E-02 | 3.79E-01 |
| <b>DNAJC12</b>     | 2.14  | 7.97E-02 | 1.00E+00 | 2.20  | 1.38E-02 | 3.80E-01 |
| <b>AACS</b>        | 0.09  | 7.44E-01 | 1.00E+00 | -0.82 | 1.39E-02 | 3.80E-01 |
| <b>FCGR1CP</b>     | 0.07  | 9.80E-01 | 1.00E+00 | 3.42  | 1.39E-02 | 3.80E-01 |
| <b>IGHV4-55</b>    | NA    | NA       | NA       | 4.93  | 1.39E-02 | 3.80E-01 |

|                    |       |          |          |       |          |          |
|--------------------|-------|----------|----------|-------|----------|----------|
| <b>AC132192.2</b>  | 1.34  | 4.04E-01 | 1.00E+00 | -3.30 | 1.39E-02 | 3.81E-01 |
| <b>CTSD</b>        | 0.16  | 4.67E-01 | 1.00E+00 | 0.97  | 1.40E-02 | 3.81E-01 |
| <b>AC018653.3</b>  | 1.32  | 3.12E-01 | 1.00E+00 | 2.51  | 1.40E-02 | 3.82E-01 |
| <b>OLA1</b>        | -0.18 | 3.37E-01 | 1.00E+00 | -0.28 | 1.40E-02 | 3.82E-01 |
| <b>SPATA13</b>     | 0.00  | 9.97E-01 | 1.00E+00 | 0.90  | 1.40E-02 | 3.82E-01 |
| <b>ST8SIA4</b>     | -0.25 | 5.91E-01 | 1.00E+00 | 1.26  | 1.41E-02 | 3.82E-01 |
| <b>CD22</b>        | 0.75  | 5.91E-01 | 1.00E+00 | 2.32  | 1.41E-02 | 3.82E-01 |
| <b>TRBV7-3</b>     | -0.13 | 9.57E-01 | 1.00E+00 | 1.89  | 1.41E-02 | 3.82E-01 |
| <b>AC004865.2</b>  | -1.96 | 1.82E-01 | 1.00E+00 | 2.15  | 1.41E-02 | 3.82E-01 |
| <b>RBP7</b>        | 0.39  | 5.16E-01 | 1.00E+00 | -1.21 | 1.41E-02 | 3.82E-01 |
| <b>RPS2P55</b>     | -3.41 | 5.85E-04 | 1.11E-01 | -1.51 | 1.42E-02 | 3.83E-01 |
| <b>SLAMF7</b>      | -0.40 | 3.25E-01 | 1.00E+00 | 1.82  | 1.42E-02 | 3.83E-01 |
| <b>CYBB</b>        | 0.04  | 9.32E-01 | 1.00E+00 | 1.86  | 1.42E-02 | 3.83E-01 |
| <b>ARHGEF25</b>    | 0.22  | 6.64E-01 | 1.00E+00 | 1.57  | 1.42E-02 | 3.83E-01 |
| <b>NBPF16</b>      | 0.76  | 2.43E-01 | 1.00E+00 | 1.08  | 1.42E-02 | 3.83E-01 |
| <b>CAPN7</b>       | 0.14  | 4.29E-01 | 1.00E+00 | -0.41 | 1.42E-02 | 3.83E-01 |
| <b>G2520</b>       | 0.51  | 4.46E-01 | 1.00E+00 | -2.46 | 1.43E-02 | 3.84E-01 |
| <b>AC100847.1</b>  | 1.41  | 2.58E-01 | 1.00E+00 | -1.70 | 1.43E-02 | 3.84E-01 |
| <b>PRR34-AS1</b>   | 0.22  | 6.48E-01 | 1.00E+00 | -1.63 | 1.44E-02 | 3.85E-01 |
| <b>RNF213</b>      | 0.06  | 8.64E-01 | 1.00E+00 | 1.40  | 1.44E-02 | 3.85E-01 |
| <b>CXCL12</b>      | 0.42  | 4.40E-01 | 1.00E+00 | 1.16  | 1.44E-02 | 3.85E-01 |
| <b>LINC01206</b>   | -0.56 | 8.73E-01 | 1.00E+00 | 3.88  | 1.44E-02 | 3.85E-01 |
| <b>G36839</b>      | -0.85 | 3.81E-01 | 1.00E+00 | -2.48 | 1.45E-02 | 3.85E-01 |
| <b>RPL24P2</b>     | -4.27 | 1.54E-01 | 1.00E+00 | -1.78 | 1.45E-02 | 3.85E-01 |
| <b>GAPDHP2</b>     | -0.79 | 8.17E-01 | 1.00E+00 | 3.61  | 1.45E-02 | 3.85E-01 |
| <b>ANKDD1B</b>     | -0.55 | 5.78E-01 | 1.00E+00 | -2.34 | 1.45E-02 | 3.85E-01 |
| <b>XLOC_008785</b> | 3.74  | 2.76E-02 | 9.71E-01 | -2.87 | 1.45E-02 | 3.85E-01 |
| <b>H3F3AP6</b>     | -0.10 | 7.85E-01 | 1.00E+00 | -0.86 | 1.45E-02 | 3.85E-01 |
| <b>CHRNA9</b>      | -1.91 | 5.67E-01 | 1.00E+00 | 2.31  | 1.45E-02 | 3.85E-01 |
| <b>SLC25A18</b>    | 0.32  | 6.32E-01 | 1.00E+00 | -1.79 | 1.45E-02 | 3.85E-01 |
| <b>ZNF662</b>      | 0.09  | 7.97E-01 | 1.00E+00 | 0.84  | 1.46E-02 | 3.85E-01 |
| <b>C1orf109</b>    | 0.27  | 2.69E-01 | 1.00E+00 | -0.66 | 1.46E-02 | 3.86E-01 |

|                   |       |          |          |       |          |          |
|-------------------|-------|----------|----------|-------|----------|----------|
| <b>AL391005.1</b> | -1.06 | 2.74E-01 | 1.00E+00 | -4.31 | 1.46E-02 | 3.86E-01 |
| <b>JAML</b>       | -0.36 | 5.42E-01 | 1.00E+00 | 1.34  | 1.47E-02 | 3.86E-01 |
| <b>LRP1</b>       | 0.76  | 1.43E-01 | 1.00E+00 | 1.64  | 1.47E-02 | 3.86E-01 |
| <b>CD2BP2</b>     | -0.01 | 9.20E-01 | 1.00E+00 | 0.50  | 1.47E-02 | 3.86E-01 |
| <b>DSG1-AS1</b>   | -0.86 | 5.83E-01 | 1.00E+00 | 1.65  | 1.47E-02 | 3.86E-01 |
| <b>CKM</b>        | -2.05 | 5.29E-01 | 1.00E+00 | -2.92 | 1.47E-02 | 3.86E-01 |
| <b>RNF125</b>     | -0.10 | 6.15E-01 | 1.00E+00 | -0.57 | 1.47E-02 | 3.86E-01 |
| <b>GPATCH11</b>   | 0.31  | 2.61E-01 | 1.00E+00 | -1.05 | 1.47E-02 | 3.86E-01 |
| <b>TMEM115</b>    | -0.06 | 7.80E-01 | 1.00E+00 | 0.42  | 1.47E-02 | 3.86E-01 |
| <b>AP000894.4</b> | 0.15  | 8.41E-01 | 1.00E+00 | -1.52 | 1.48E-02 | 3.86E-01 |
| <b>AC122718.1</b> | 0.10  | 8.64E-01 | 1.00E+00 | 1.14  | 1.48E-02 | 3.86E-01 |
| <b>AGAP2</b>      | -0.54 | 3.19E-01 | 1.00E+00 | 1.87  | 1.48E-02 | 3.86E-01 |
| <b>IQCH-AS1</b>   | -0.02 | 9.57E-01 | 1.00E+00 | -1.28 | 1.48E-02 | 3.86E-01 |
| <b>RNF14</b>      | 0.53  | 1.02E-01 | 1.00E+00 | -0.74 | 1.48E-02 | 3.86E-01 |
| <b>MUCL1</b>      | 0.71  | 5.70E-01 | 1.00E+00 | -1.98 | 1.49E-02 | 3.86E-01 |
| <b>GLIS2</b>      | 0.01  | 9.78E-01 | 1.00E+00 | 1.74  | 1.49E-02 | 3.86E-01 |
| <b>ADAM8</b>      | -0.98 | 8.05E-02 | 1.00E+00 | 2.53  | 1.49E-02 | 3.86E-01 |
| <b>LPIN3</b>      | -0.27 | 3.55E-01 | 1.00E+00 | 0.69  | 1.49E-02 | 3.86E-01 |
| <b>PCNX1</b>      | 0.31  | 2.24E-01 | 1.00E+00 | 1.06  | 1.49E-02 | 3.86E-01 |
| <b>ALG14</b>      | 0.02  | 9.35E-01 | 1.00E+00 | -0.69 | 1.49E-02 | 3.86E-01 |
| <b>PSPC1</b>      | -0.27 | 7.47E-02 | 1.00E+00 | 0.45  | 1.49E-02 | 3.86E-01 |
| <b>PANX1</b>      | -0.13 | 7.19E-01 | 1.00E+00 | 0.89  | 1.50E-02 | 3.86E-01 |
| <b>AC012569.1</b> | -1.55 | 6.45E-01 | 1.00E+00 | 2.69  | 1.50E-02 | 3.86E-01 |
| <b>FAF1</b>       | -0.14 | 5.55E-01 | 1.00E+00 | -1.18 | 1.50E-02 | 3.86E-01 |
| <b>CDH3</b>       | -0.65 | 2.28E-02 | 9.09E-01 | 1.45  | 1.50E-02 | 3.86E-01 |
| <b>CFAP97</b>     | -0.01 | 9.64E-01 | 1.00E+00 | -0.52 | 1.50E-02 | 3.86E-01 |
| <b>MTCL1</b>      | -0.96 | 4.92E-02 | 1.00E+00 | 1.91  | 1.50E-02 | 3.86E-01 |
| <b>USP2</b>       | -0.40 | 5.44E-01 | 1.00E+00 | 1.04  | 1.50E-02 | 3.86E-01 |
| <b>AL354920.1</b> | -0.80 | 8.64E-02 | 1.00E+00 | -1.03 | 1.51E-02 | 3.86E-01 |
| <b>ATF5</b>       | 0.00  | 9.94E-01 | 1.00E+00 | 1.32  | 1.51E-02 | 3.86E-01 |
| <b>CATSPER2P1</b> | -0.33 | 4.73E-01 | 1.00E+00 | -0.84 | 1.51E-02 | 3.86E-01 |
| <b>MIR4653</b>    | -3.27 | 2.82E-02 | 9.75E-01 | 1.39  | 1.52E-02 | 3.86E-01 |

|             |       |          |          |       |          |          |
|-------------|-------|----------|----------|-------|----------|----------|
| LHFPL2      | 0.19  | 6.67E-01 | 1.00E+00 | 1.50  | 1.52E-02 | 3.86E-01 |
| SRSF2       | -0.04 | 8.67E-01 | 1.00E+00 | -0.57 | 1.52E-02 | 3.86E-01 |
| FOXI3       | -1.04 | 4.46E-01 | 1.00E+00 | -3.70 | 1.52E-02 | 3.86E-01 |
| NFYC-AS1    | -2.58 | 1.28E-01 | 1.00E+00 | -2.60 | 1.52E-02 | 3.86E-01 |
| RAPGEF2     | 0.07  | 8.51E-01 | 1.00E+00 | 0.98  | 1.52E-02 | 3.86E-01 |
| YRDC        | 0.00  | 9.92E-01 | 1.00E+00 | -1.14 | 1.53E-02 | 3.89E-01 |
| UBE2L6      | -0.15 | 7.67E-01 | 1.00E+00 | 0.93  | 1.53E-02 | 3.89E-01 |
| MYO9B       | -0.59 | 3.57E-02 | 1.00E+00 | 1.77  | 1.53E-02 | 3.89E-01 |
| TSPAN9      | -0.02 | 9.36E-01 | 1.00E+00 | 1.25  | 1.54E-02 | 3.90E-01 |
| AL627309.1  | -0.52 | 6.63E-01 | 1.00E+00 | 2.61  | 1.54E-02 | 3.90E-01 |
| ABI3        | -0.27 | 4.31E-01 | 1.00E+00 | 1.01  | 1.54E-02 | 3.90E-01 |
| XLOC_013370 | -2.78 | 2.17E-01 | 1.00E+00 | -3.61 | 1.54E-02 | 3.90E-01 |
| PIAS2       | 0.08  | 7.62E-01 | 1.00E+00 | -0.74 | 1.55E-02 | 3.90E-01 |
| G16357      | -1.24 | 7.22E-03 | 5.15E-01 | 2.73  | 1.55E-02 | 3.90E-01 |
| OR52K3P     | 0.29  | 8.48E-01 | 1.00E+00 | 2.79  | 1.55E-02 | 3.90E-01 |
| NFATC4      | 0.23  | 5.40E-01 | 1.00E+00 | 1.46  | 1.56E-02 | 3.91E-01 |
| PTGIR       | 0.06  | 8.90E-01 | 1.00E+00 | 1.26  | 1.56E-02 | 3.92E-01 |
| RPS4XP22    | 0.54  | 8.31E-01 | 1.00E+00 | -2.60 | 1.56E-02 | 3.92E-01 |
| PSMB9       | -0.31 | 4.91E-01 | 1.00E+00 | 0.92  | 1.57E-02 | 3.92E-01 |
| SNX29       | -0.11 | 6.17E-01 | 1.00E+00 | 0.84  | 1.57E-02 | 3.92E-01 |
| FBN2        | 0.57  | 4.64E-01 | 1.00E+00 | 3.00  | 1.57E-02 | 3.92E-01 |
| MUT         | 0.07  | 7.81E-01 | 1.00E+00 | -0.59 | 1.57E-02 | 3.92E-01 |
| NSUN6       | -0.11 | 7.47E-01 | 1.00E+00 | -0.77 | 1.57E-02 | 3.92E-01 |
| TIMP2       | 0.38  | 4.21E-01 | 1.00E+00 | 1.38  | 1.57E-02 | 3.92E-01 |
| ALKBH3-AS1  | 0.37  | 7.31E-01 | 1.00E+00 | 2.18  | 1.58E-02 | 3.92E-01 |
| MIR31HG     | -1.88 | 5.82E-01 | 1.00E+00 | 3.33  | 1.58E-02 | 3.93E-01 |
| MYD88       | -0.28 | 4.27E-01 | 1.00E+00 | 0.86  | 1.58E-02 | 3.93E-01 |
| VCAN        | 0.12  | 7.70E-01 | 1.00E+00 | 1.05  | 1.59E-02 | 3.93E-01 |
| DYNCL1I2    | 0.16  | 3.05E-01 | 1.00E+00 | 0.41  | 1.59E-02 | 3.93E-01 |
| C1RL        | -0.01 | 9.80E-01 | 1.00E+00 | 1.23  | 1.59E-02 | 3.93E-01 |
| LYSMD3      | 0.13  | 6.85E-01 | 1.00E+00 | -0.77 | 1.59E-02 | 3.93E-01 |
| NREP        | -0.25 | 5.77E-01 | 1.00E+00 | 0.76  | 1.59E-02 | 3.93E-01 |

|                    |       |          |          |       |          |          |
|--------------------|-------|----------|----------|-------|----------|----------|
| <b>AC012360.1</b>  | -1.60 | 5.08E-01 | 1.00E+00 | -3.64 | 1.60E-02 | 3.93E-01 |
| <b>AF064858.2</b>  | 0.98  | 5.90E-01 | 1.00E+00 | 3.22  | 1.60E-02 | 3.93E-01 |
| <b>APOBR</b>       | -0.91 | 6.08E-02 | 1.00E+00 | 2.49  | 1.60E-02 | 3.93E-01 |
| <b>FLJ42969</b>    | -3.54 | 1.20E-01 | 1.00E+00 | 3.29  | 1.60E-02 | 3.93E-01 |
| <b>ZNF300P1</b>    | 0.87  | 1.14E-01 | 1.00E+00 | -1.66 | 1.60E-02 | 3.93E-01 |
| <b>AK7</b>         | -0.11 | 8.38E-01 | 1.00E+00 | -1.12 | 1.60E-02 | 3.93E-01 |
| <b>TMEM229B</b>    | -0.73 | 6.52E-02 | 1.00E+00 | 1.69  | 1.61E-02 | 3.93E-01 |
| <b>VN1R20P</b>     | -0.39 | 7.99E-01 | 1.00E+00 | -2.92 | 1.61E-02 | 3.93E-01 |
| <b>SCARNA21</b>    | -2.18 | 4.76E-01 | 1.00E+00 | -2.20 | 1.61E-02 | 3.93E-01 |
| <b>WNT9A</b>       | 0.02  | 9.63E-01 | 1.00E+00 | 1.74  | 1.61E-02 | 3.93E-01 |
| <b>PARVG</b>       | -0.27 | 5.60E-01 | 1.00E+00 | 1.39  | 1.61E-02 | 3.93E-01 |
| <b>AC093700.1</b>  | -0.80 | 8.18E-01 | 1.00E+00 | 2.66  | 1.61E-02 | 3.93E-01 |
| <b>HRASLS</b>      | 0.05  | 9.05E-01 | 1.00E+00 | -1.56 | 1.62E-02 | 3.93E-01 |
| <b>RAB21</b>       | 0.02  | 9.03E-01 | 1.00E+00 | -0.58 | 1.62E-02 | 3.93E-01 |
| <b>EMP3</b>        | -0.02 | 9.62E-01 | 1.00E+00 | 0.64  | 1.62E-02 | 3.93E-01 |
| <b>GDNF-AS1</b>    | -1.04 | 5.16E-01 | 1.00E+00 | 2.47  | 1.62E-02 | 3.93E-01 |
| <b>STAM-AS1</b>    | 0.79  | 7.65E-01 | 1.00E+00 | 1.90  | 1.62E-02 | 3.93E-01 |
| <b>AL109840.2</b>  | -0.87 | 7.94E-01 | 1.00E+00 | 2.46  | 1.62E-02 | 3.93E-01 |
| <b>CSPG4P11</b>    | -0.27 | 6.65E-01 | 1.00E+00 | 2.08  | 1.62E-02 | 3.93E-01 |
| <b>IL2RG</b>       | -1.04 | 2.08E-01 | 1.00E+00 | 1.08  | 1.62E-02 | 3.93E-01 |
| <b>AL359921.2</b>  | -0.34 | 6.66E-01 | 1.00E+00 | 1.61  | 1.63E-02 | 3.94E-01 |
| <b>RAB40B</b>      | 0.05  | 7.73E-01 | 1.00E+00 | -0.83 | 1.63E-02 | 3.94E-01 |
| <b>TCEA3</b>       | 0.05  | 7.73E-01 | 1.00E+00 | -0.83 | 1.63E-02 | 3.94E-01 |
| <b>DHRS4-AS1</b>   | -0.21 | 3.99E-01 | 1.00E+00 | -0.60 | 1.63E-02 | 3.94E-01 |
| <b>MRAP2</b>       | -0.71 | 7.57E-02 | 1.00E+00 | -1.68 | 1.64E-02 | 3.94E-01 |
| <b>PON3</b>        | -0.63 | 1.66E-01 | 1.00E+00 | -1.55 | 1.64E-02 | 3.94E-01 |
| <b>AOAH</b>        | 0.23  | 5.95E-01 | 1.00E+00 | 1.77  | 1.64E-02 | 3.94E-01 |
| <b>TMEM202-AS1</b> | 0.07  | 9.17E-01 | 1.00E+00 | -1.23 | 1.64E-02 | 3.94E-01 |
| <b>ESD</b>         | 0.06  | 7.35E-01 | 1.00E+00 | -0.50 | 1.64E-02 | 3.94E-01 |
| <b>PLPBP</b>       | 0.18  | 4.47E-01 | 1.00E+00 | -0.60 | 1.64E-02 | 3.94E-01 |
| <b>KCNJ5</b>       | -0.09 | 8.51E-01 | 1.00E+00 | 2.01  | 1.64E-02 | 3.94E-01 |
| <b>MASP1</b>       | 0.39  | 4.98E-01 | 1.00E+00 | 1.55  | 1.64E-02 | 3.94E-01 |

|                   |       |          |          |       |          |          |
|-------------------|-------|----------|----------|-------|----------|----------|
| <b>TRIM60P18</b>  | 0.23  | 9.14E-01 | 1.00E+00 | -2.73 | 1.65E-02 | 3.94E-01 |
| <b>RNU6-37P</b>   | 0.78  | 4.28E-01 | 1.00E+00 | 2.50  | 1.65E-02 | 3.94E-01 |
| <b>TCEA1P2</b>    | -0.11 | 8.24E-01 | 1.00E+00 | -0.72 | 1.65E-02 | 3.94E-01 |
| <b>NAALADL2</b>   | 0.30  | 3.97E-01 | 1.00E+00 | -0.77 | 1.66E-02 | 3.95E-01 |
| <b>CCR1</b>       | 0.56  | 3.90E-01 | 1.00E+00 | 2.10  | 1.66E-02 | 3.95E-01 |
| <b>BHLHB9</b>     | -0.15 | 5.24E-01 | 1.00E+00 | -0.98 | 1.66E-02 | 3.95E-01 |
| <b>U2AF2</b>      | -0.23 | 2.29E-01 | 1.00E+00 | 1.74  | 1.66E-02 | 3.95E-01 |
| <b>G41661</b>     | 0.08  | 8.85E-01 | 1.00E+00 | 1.95  | 1.66E-02 | 3.95E-01 |
| <b>ALPK2</b>      | -0.34 | 7.04E-01 | 1.00E+00 | 2.30  | 1.66E-02 | 3.95E-01 |
| <b>AC139100.1</b> | -0.53 | 6.10E-01 | 1.00E+00 | -1.69 | 1.67E-02 | 3.95E-01 |
| <b>LCAT</b>       | 0.13  | 7.78E-01 | 1.00E+00 | 1.22  | 1.67E-02 | 3.95E-01 |
| <b>PLAC8</b>      | 0.33  | 7.45E-01 | 1.00E+00 | 1.79  | 1.67E-02 | 3.95E-01 |
| <b>P2RY2</b>      | -0.43 | 2.78E-01 | 1.00E+00 | 1.28  | 1.68E-02 | 3.96E-01 |
| <b>GLCCI1</b>     | 0.04  | 9.07E-01 | 1.00E+00 | -0.86 | 1.68E-02 | 3.97E-01 |
| <b>SMAD5</b>      | 0.24  | 2.89E-01 | 1.00E+00 | -0.45 | 1.68E-02 | 3.97E-01 |
| <b>KANSL1-AS1</b> | 0.11  | 8.50E-01 | 1.00E+00 | -1.16 | 1.69E-02 | 3.97E-01 |
| <b>DSC2</b>       | -0.54 | 6.10E-02 | 1.00E+00 | 0.95  | 1.69E-02 | 3.97E-01 |
| <b>IVL</b>        | -0.14 | 7.97E-01 | 1.00E+00 | 2.06  | 1.69E-02 | 3.97E-01 |
| <b>LINC02298</b>  | -0.25 | 6.14E-01 | 1.00E+00 | -1.37 | 1.69E-02 | 3.97E-01 |
| <b>FOXS1</b>      | 0.06  | 9.23E-01 | 1.00E+00 | 1.15  | 1.69E-02 | 3.97E-01 |
| <b>CCER2</b>      | -2.22 | 1.20E-02 | 6.79E-01 | -2.12 | 1.69E-02 | 3.97E-01 |
| <b>AP001160.3</b> | -1.15 | 4.45E-01 | 1.00E+00 | -2.60 | 1.69E-02 | 3.97E-01 |
| <b>SERPINH1</b>   | -0.16 | 6.99E-01 | 1.00E+00 | 1.08  | 1.69E-02 | 3.97E-01 |
| <b>HS3ST1</b>     | 0.03  | 9.58E-01 | 1.00E+00 | 1.09  | 1.70E-02 | 3.97E-01 |
| <b>EIF2S2P3</b>   | 3.05  | 1.18E-01 | 1.00E+00 | 1.83  | 1.71E-02 | 3.99E-01 |
| <b>FBLN7</b>      | 0.97  | 1.12E-03 | 1.75E-01 | 1.37  | 1.71E-02 | 3.99E-01 |
| <b>TRBV9</b>      | -1.62 | 3.86E-01 | 1.00E+00 | 2.36  | 1.72E-02 | 4.01E-01 |
| <b>LAPTM5</b>     | -0.17 | 4.62E-01 | 1.00E+00 | 1.29  | 1.72E-02 | 4.02E-01 |
| <b>LNCAROD</b>    | 1.37  | 1.85E-01 | 1.00E+00 | 2.75  | 1.72E-02 | 4.02E-01 |
| <b>AC005618.1</b> | -0.19 | 7.91E-01 | 1.00E+00 | -2.09 | 1.73E-02 | 4.02E-01 |
| <b>CYP1B1</b>     | -0.22 | 6.36E-01 | 1.00E+00 | 0.78  | 1.73E-02 | 4.02E-01 |
| <b>FN1</b>        | -0.14 | 7.75E-01 | 1.00E+00 | 1.53  | 1.73E-02 | 4.02E-01 |

|              |       |          |          |       |          |          |
|--------------|-------|----------|----------|-------|----------|----------|
| ARHGAP9      | -0.73 | 2.53E-01 | 1.00E+00 | 1.16  | 1.73E-02 | 4.02E-01 |
| AC067945.1   | 0.28  | 8.74E-01 | 1.00E+00 | 2.04  | 1.74E-02 | 4.02E-01 |
| MMP2         | 0.31  | 5.71E-01 | 1.00E+00 | 1.46  | 1.74E-02 | 4.02E-01 |
| AC073335.2   | -0.82 | 4.09E-01 | 1.00E+00 | 2.03  | 1.74E-02 | 4.02E-01 |
| AL078590.2   | -0.36 | 8.13E-01 | 1.00E+00 | 2.14  | 1.74E-02 | 4.02E-01 |
| ARSA         | -0.26 | 4.75E-01 | 1.00E+00 | 1.01  | 1.74E-02 | 4.02E-01 |
| AC018523.1   | 30.00 | 6.59E-18 | 5.54E-15 | -1.78 | 1.75E-02 | 4.02E-01 |
| APOBEC3C     | -0.36 | 1.98E-01 | 1.00E+00 | 0.51  | 1.75E-02 | 4.02E-01 |
| REST         | 0.26  | 1.34E-01 | 1.00E+00 | -0.68 | 1.75E-02 | 4.03E-01 |
| ZBTB20-AS4   | 1.16  | 3.59E-01 | 1.00E+00 | -1.97 | 1.75E-02 | 4.03E-01 |
| FAM89A       | 0.36  | 3.24E-01 | 1.00E+00 | -1.47 | 1.75E-02 | 4.03E-01 |
| HLA-DPB2     | -1.03 | 7.43E-01 | 1.00E+00 | 1.88  | 1.76E-02 | 4.04E-01 |
| SLC38A7      | -0.19 | 4.48E-01 | 1.00E+00 | 0.73  | 1.76E-02 | 4.04E-01 |
| RP11-423O2.5 | -0.20 | 7.56E-01 | 1.00E+00 | -0.96 | 1.76E-02 | 4.04E-01 |
| IGKV6-21     | 2.81  | 8.25E-02 | 1.00E+00 | 2.70  | 1.76E-02 | 4.04E-01 |
| AC005831.1   | -0.92 | 6.60E-01 | 1.00E+00 | -2.41 | 1.76E-02 | 4.04E-01 |
| KRT17        | -0.84 | 1.44E-01 | 1.00E+00 | 1.72  | 1.77E-02 | 4.04E-01 |
| KCNK2        | 0.01  | 9.86E-01 | 1.00E+00 | 1.47  | 1.77E-02 | 4.04E-01 |
| AC104986.2   | 0.18  | 7.61E-01 | 1.00E+00 | -1.09 | 1.77E-02 | 4.04E-01 |
| TGFB2-AS1    | -0.57 | 3.33E-01 | 1.00E+00 | 1.26  | 1.78E-02 | 4.05E-01 |
| CD163        | -0.25 | 6.03E-01 | 1.00E+00 | 1.81  | 1.78E-02 | 4.05E-01 |
| STAC3        | -0.78 | 9.33E-02 | 1.00E+00 | 2.40  | 1.78E-02 | 4.05E-01 |
| AP001206.1   | -1.10 | 7.53E-01 | 1.00E+00 | -3.88 | 1.78E-02 | 4.05E-01 |
| BISPR        | -0.92 | 1.78E-01 | 1.00E+00 | 1.46  | 1.79E-02 | 4.05E-01 |
| CHST11       | -0.46 | 5.46E-02 | 1.00E+00 | 2.03  | 1.79E-02 | 4.05E-01 |
| UBE2SP1      | -0.98 | 6.75E-01 | 1.00E+00 | -2.61 | 1.79E-02 | 4.05E-01 |
| AL021155.2   | -3.54 | 1.09E-02 | 6.43E-01 | -1.88 | 1.79E-02 | 4.05E-01 |
| ZNF697       | 0.25  | 5.57E-01 | 1.00E+00 | 1.48  | 1.79E-02 | 4.06E-01 |
| TRIM21       | -0.13 | 7.98E-01 | 1.00E+00 | 0.90  | 1.80E-02 | 4.06E-01 |
| AL355994.2   | -2.69 | 4.91E-02 | 1.00E+00 | -3.18 | 1.80E-02 | 4.06E-01 |
| DLG4         | -0.44 | 3.79E-01 | 1.00E+00 | 2.54  | 1.80E-02 | 4.06E-01 |
| MNX1         | -0.30 | 8.21E-01 | 1.00E+00 | -3.27 | 1.81E-02 | 4.06E-01 |

|                    |       |          |          |       |          |          |
|--------------------|-------|----------|----------|-------|----------|----------|
| <b>SMOX</b>        | 0.01  | 9.90E-01 | 1.00E+00 | 1.14  | 1.81E-02 | 4.06E-01 |
| <b>AL157838.1</b>  | 0.19  | 8.62E-01 | 1.00E+00 | 2.61  | 1.81E-02 | 4.06E-01 |
| <b>IGF2BP2</b>     | -0.18 | 6.80E-01 | 1.00E+00 | 1.21  | 1.81E-02 | 4.06E-01 |
| <b>PIGX</b>        | 0.08  | 7.13E-01 | 1.00E+00 | -1.00 | 1.81E-02 | 4.06E-01 |
| <b>PLA2G12AP1</b>  | -0.63 | 6.66E-01 | 1.00E+00 | -1.94 | 1.81E-02 | 4.06E-01 |
| <b>ZNF420</b>      | 0.33  | 3.85E-01 | 1.00E+00 | -0.97 | 1.81E-02 | 4.06E-01 |
| <b>SNX12</b>       | 0.08  | 6.23E-01 | 1.00E+00 | 1.03  | 1.81E-02 | 4.06E-01 |
| <b>ALDH3B1</b>     | 0.13  | 7.34E-01 | 1.00E+00 | 0.97  | 1.82E-02 | 4.07E-01 |
| <b>KCNAB2</b>      | -0.27 | 2.00E-01 | 1.00E+00 | 1.45  | 1.82E-02 | 4.08E-01 |
| <b>AL451060.1</b>  | -1.43 | 2.00E-01 | 1.00E+00 | -1.34 | 1.83E-02 | 4.08E-01 |
| <b>SDR42E2</b>     | -2.94 | 6.71E-02 | 1.00E+00 | -2.24 | 1.83E-02 | 4.08E-01 |
| <b>PDE6A</b>       | 0.97  | 5.15E-01 | 1.00E+00 | -2.35 | 1.83E-02 | 4.08E-01 |
| <b>TGFBI</b>       | -0.08 | 7.62E-01 | 1.00E+00 | 0.79  | 1.83E-02 | 4.08E-01 |
| <b>AC128709.2</b>  | -0.92 | 6.47E-01 | 1.00E+00 | -2.73 | 1.83E-02 | 4.08E-01 |
| <b>GRINA</b>       | -0.09 | 7.14E-01 | 1.00E+00 | 1.07  | 1.83E-02 | 4.08E-01 |
| <b>COL6A3</b>      | -0.40 | 3.98E-01 | 1.00E+00 | 1.64  | 1.84E-02 | 4.08E-01 |
| <b>AGPAT4</b>      | 0.10  | 7.97E-01 | 1.00E+00 | 1.08  | 1.84E-02 | 4.08E-01 |
| <b>GPSM2</b>       | 0.00  | 9.91E-01 | 1.00E+00 | -1.11 | 1.84E-02 | 4.08E-01 |
| <b>SPG21</b>       | 0.17  | 3.17E-01 | 1.00E+00 | -0.85 | 1.85E-02 | 4.08E-01 |
| <b>IFIT3</b>       | -0.40 | 6.13E-01 | 1.00E+00 | 1.61  | 1.85E-02 | 4.08E-01 |
| <b>SHC1</b>        | -0.01 | 9.68E-01 | 1.00E+00 | 0.81  | 1.85E-02 | 4.08E-01 |
| <b>RHOJ</b>        | 0.09  | 8.18E-01 | 1.00E+00 | 0.92  | 1.85E-02 | 4.08E-01 |
| <b>PPP1R14BP3</b>  | 0.25  | 6.44E-01 | 1.00E+00 | -1.13 | 1.85E-02 | 4.09E-01 |
| <b>PDK2</b>        | 0.07  | 7.85E-01 | 1.00E+00 | -0.63 | 1.85E-02 | 4.09E-01 |
| <b>TFPT</b>        | 0.07  | 7.54E-01 | 1.00E+00 | 0.69  | 1.86E-02 | 4.09E-01 |
| <b>XLOC_000271</b> | -1.45 | 2.44E-01 | 1.00E+00 | 1.83  | 1.86E-02 | 4.09E-01 |
| <b>EGFEM1P</b>     | 0.26  | 9.39E-01 | 1.00E+00 | -4.49 | 1.87E-02 | 4.10E-01 |
| <b>ECHS1</b>       | 0.30  | 4.41E-01 | 1.00E+00 | -0.71 | 1.87E-02 | 4.10E-01 |
| <b>SLC30A5</b>     | 0.32  | 2.32E-01 | 1.00E+00 | -0.81 | 1.87E-02 | 4.10E-01 |
| <b>TRMT12</b>      | 0.20  | 3.09E-01 | 1.00E+00 | 0.59  | 1.87E-02 | 4.10E-01 |
| <b>NDUFB1</b>      | -0.05 | 8.70E-01 | 1.00E+00 | -1.05 | 1.87E-02 | 4.10E-01 |
| <b>AC005014.2</b>  | -1.69 | 6.19E-01 | 1.00E+00 | -3.71 | 1.88E-02 | 4.10E-01 |



|                   |       |          |          |       |          |          |
|-------------------|-------|----------|----------|-------|----------|----------|
| <b>MDFI</b>       | 0.30  | 6.36E-01 | 1.00E+00 | 1.81  | 1.88E-02 | 4.10E-01 |
| <b>BTN3A3</b>     | 0.03  | 9.55E-01 | 1.00E+00 | 1.11  | 1.88E-02 | 4.10E-01 |
| <b>NEFL</b>       | -2.60 | 4.20E-01 | 1.00E+00 | 1.85  | 1.88E-02 | 4.10E-01 |
| <b>SGIP1</b>      | 0.13  | 8.71E-01 | 1.00E+00 | 1.75  | 1.88E-02 | 4.10E-01 |
| <b>NNMT</b>       | 0.30  | 4.21E-01 | 1.00E+00 | 1.26  | 1.88E-02 | 4.10E-01 |
| <b>AC140479.7</b> | -0.27 | 9.38E-01 | 1.00E+00 | 3.92  | 1.88E-02 | 4.10E-01 |
| <b>MBD1</b>       | -0.04 | 8.74E-01 | 1.00E+00 | 0.58  | 1.89E-02 | 4.10E-01 |
| <b>PPIAP22</b>    | -0.25 | 2.81E-01 | 1.00E+00 | -0.51 | 1.89E-02 | 4.11E-01 |
| <b>CCR7</b>       | -0.65 | 3.55E-01 | 1.00E+00 | 1.99  | 1.91E-02 | 4.15E-01 |
| <b>ZNF394</b>     | -0.05 | 8.32E-01 | 1.00E+00 | 0.30  | 1.91E-02 | 4.15E-01 |
| <b>RNLS</b>       | -0.07 | 7.17E-01 | 1.00E+00 | -0.67 | 1.92E-02 | 4.16E-01 |
| <b>NDUFAF3</b>    | 0.06  | 8.07E-01 | 1.00E+00 | -0.70 | 1.92E-02 | 4.16E-01 |
| <b>HSF2</b>       | -0.26 | 3.59E-01 | 1.00E+00 | -0.78 | 1.93E-02 | 4.17E-01 |
| <b>FOXD4</b>      | -1.89 | 3.43E-01 | 1.00E+00 | 3.59  | 1.93E-02 | 4.17E-01 |
| <b>AC012236.1</b> | 0.93  | 7.24E-01 | 1.00E+00 | 2.87  | 1.93E-02 | 4.17E-01 |
| <b>DNAH8</b>      | -3.77 | 2.35E-02 | 9.15E-01 | -2.91 | 1.93E-02 | 4.17E-01 |
| <b>AC104692.1</b> | -0.13 | 9.70E-01 | 1.00E+00 | 3.46  | 1.94E-02 | 4.18E-01 |
| <b>CD53</b>       | -0.05 | 9.09E-01 | 1.00E+00 | 1.41  | 1.94E-02 | 4.18E-01 |
| <b>USF2</b>       | -0.16 | 4.38E-01 | 1.00E+00 | 1.36  | 1.94E-02 | 4.18E-01 |
| <b>CD72</b>       | -1.88 | 1.16E-02 | 6.66E-01 | 2.04  | 1.95E-02 | 4.20E-01 |
| <b>AL033397.2</b> | 0.50  | 6.64E-01 | 1.00E+00 | -2.31 | 1.96E-02 | 4.21E-01 |
| <b>MRPL33</b>     | 0.24  | 3.57E-01 | 1.00E+00 | -0.99 | 1.96E-02 | 4.21E-01 |
| <b>MFGE8</b>      | -0.10 | 8.11E-01 | 1.00E+00 | 0.93  | 1.97E-02 | 4.22E-01 |
| <b>CLEC11A</b>    | -0.27 | 5.15E-01 | 1.00E+00 | 0.78  | 1.97E-02 | 4.22E-01 |
| <b>HFE</b>        | 0.14  | 6.78E-01 | 1.00E+00 | 0.86  | 1.98E-02 | 4.24E-01 |
| <b>AC010809.1</b> | -2.19 | 2.48E-01 | 1.00E+00 | 2.27  | 1.98E-02 | 4.24E-01 |
| <b>MYO1F</b>      | -0.14 | 6.89E-01 | 1.00E+00 | 1.77  | 1.99E-02 | 4.24E-01 |
| <b>AL359915.2</b> | 0.20  | 6.91E-01 | 1.00E+00 | 0.74  | 1.99E-02 | 4.24E-01 |
| <b>RAD9A</b>      | -0.15 | 5.21E-01 | 1.00E+00 | 0.58  | 2.00E-02 | 4.24E-01 |
| <b>SSH1</b>       | 0.18  | 2.47E-01 | 1.00E+00 | 1.16  | 2.00E-02 | 4.24E-01 |
| <b>PIK3CD</b>     | 0.11  | 7.66E-01 | 1.00E+00 | 1.58  | 2.00E-02 | 4.24E-01 |
| <b>AL392172.1</b> | -0.05 | 9.14E-01 | 1.00E+00 | -0.90 | 2.00E-02 | 4.24E-01 |

|                    |       |          |          |       |          |          |
|--------------------|-------|----------|----------|-------|----------|----------|
| <b>LUARIS</b>      | 0.43  | 9.01E-01 | 1.00E+00 | 4.19  | 2.01E-02 | 4.24E-01 |
| <b>TRGV7</b>       | -1.73 | 4.61E-01 | 1.00E+00 | 2.11  | 2.01E-02 | 4.24E-01 |
| <b>THEMIS</b>      | -0.73 | 3.47E-01 | 1.00E+00 | 2.14  | 2.01E-02 | 4.24E-01 |
| <b>AC138951.1</b>  | -2.70 | 8.37E-02 | 1.00E+00 | -1.83 | 2.01E-02 | 4.24E-01 |
| <b>WISP2</b>       | 1.37  | 1.29E-02 | 7.15E-01 | 1.26  | 2.01E-02 | 4.24E-01 |
| <b>AC004706.3</b>  | -0.49 | 4.96E-01 | 1.00E+00 | 4.07  | 2.01E-02 | 4.24E-01 |
| <b>CAMTA1</b>      | -0.20 | 3.99E-01 | 1.00E+00 | -0.70 | 2.01E-02 | 4.24E-01 |
| <b>UBXN11</b>      | 0.20  | 4.10E-01 | 1.00E+00 | 0.54  | 2.01E-02 | 4.24E-01 |
| <b>AC069213.3</b>  | NA    | NA       | NA       | -2.06 | 2.01E-02 | 4.24E-01 |
| <b>KCNJ10</b>      | -4.26 | 8.52E-04 | 1.48E-01 | 3.17  | 2.01E-02 | 4.24E-01 |
| <b>PTPRE</b>       | -0.23 | 3.45E-01 | 1.00E+00 | 0.84  | 2.01E-02 | 4.24E-01 |
| <b>RPL23AP58</b>   | 0.85  | 8.00E-01 | 1.00E+00 | -3.47 | 2.02E-02 | 4.25E-01 |
| <b>TNFSF13</b>     | 0.44  | 2.77E-01 | 1.00E+00 | 0.90  | 2.02E-02 | 4.25E-01 |
| <b>LUCAT1</b>      | 0.69  | 2.88E-01 | 1.00E+00 | 1.61  | 2.02E-02 | 4.25E-01 |
| <b>WDR45</b>       | -0.08 | 7.10E-01 | 1.00E+00 | 0.38  | 2.02E-02 | 4.25E-01 |
| <b>NRXN2</b>       | 0.14  | 8.59E-01 | 1.00E+00 | 1.98  | 2.03E-02 | 4.25E-01 |
| <b>ADGRF5P1</b>    | -2.90 | 2.91E-02 | 9.89E-01 | -2.54 | 2.03E-02 | 4.26E-01 |
| <b>XLOC_012579</b> | -0.18 | 8.46E-01 | 1.00E+00 | 1.57  | 2.03E-02 | 4.27E-01 |
| <b>LTBP3</b>       | 0.23  | 5.55E-01 | 1.00E+00 | 1.04  | 2.04E-02 | 4.27E-01 |
| <b>PEX7</b>        | -0.01 | 9.83E-01 | 1.00E+00 | -0.84 | 2.04E-02 | 4.27E-01 |
| <b>ZBED5</b>       | 0.13  | 5.94E-01 | 1.00E+00 | -0.47 | 2.05E-02 | 4.27E-01 |
| <b>THOC7</b>       | -0.13 | 5.05E-01 | 1.00E+00 | -0.52 | 2.05E-02 | 4.27E-01 |
| <b>XLOC_008417</b> | -0.44 | 7.48E-01 | 1.00E+00 | -3.42 | 2.05E-02 | 4.27E-01 |
| <b>MTRNR2L3</b>    | 1.36  | 6.93E-01 | 1.00E+00 | 2.99  | 2.05E-02 | 4.27E-01 |
| <b>AC012181.1</b>  | -2.44 | 2.02E-01 | 1.00E+00 | 2.16  | 2.05E-02 | 4.27E-01 |
| <b>TRBV5-1</b>     | -1.94 | 1.79E-01 | 1.00E+00 | 2.18  | 2.05E-02 | 4.27E-01 |
| <b>ODF3B</b>       | -0.15 | 8.06E-01 | 1.00E+00 | 0.91  | 2.06E-02 | 4.28E-01 |
| <b>MGAT5</b>       | 0.03  | 9.19E-01 | 1.00E+00 | 1.31  | 2.06E-02 | 4.28E-01 |
| <b>XLOC_008020</b> | -0.24 | 7.43E-01 | 1.00E+00 | 1.86  | 2.06E-02 | 4.28E-01 |
| <b>LLGL1</b>       | -0.18 | 4.51E-01 | 1.00E+00 | 1.75  | 2.06E-02 | 4.28E-01 |
| <b>PTPRJ</b>       | 0.22  | 5.72E-01 | 1.00E+00 | 1.54  | 2.06E-02 | 4.28E-01 |
| <b>AC007216.4</b>  | -1.59 | 3.63E-01 | 1.00E+00 | 2.53  | 2.07E-02 | 4.28E-01 |

|                    |       |          |          |       |          |          |
|--------------------|-------|----------|----------|-------|----------|----------|
| <b>AC103691.1</b>  | 0.25  | 8.96E-01 | 1.00E+00 | -1.76 | 2.07E-02 | 4.28E-01 |
| <b>EIF3CL</b>      | -0.24 | 5.89E-01 | 1.00E+00 | -0.61 | 2.07E-02 | 4.28E-01 |
| <b>AREG</b>        | -0.78 | 4.24E-01 | 1.00E+00 | 1.22  | 2.08E-02 | 4.28E-01 |
| <b>RNF180</b>      | -0.18 | 4.60E-01 | 1.00E+00 | -0.86 | 2.08E-02 | 4.28E-01 |
| <b>RSAD2</b>       | -0.08 | 9.50E-01 | 1.00E+00 | 1.95  | 2.08E-02 | 4.28E-01 |
| <b>IGKV3-7</b>     | NA    | NA       | NA       | 5.46  | 2.08E-02 | 4.28E-01 |
| <b>FMO5</b>        | 0.33  | 4.47E-01 | 1.00E+00 | -0.93 | 2.08E-02 | 4.28E-01 |
| <b>RPS19P3</b>     | -0.11 | 9.58E-01 | 1.00E+00 | -1.51 | 2.09E-02 | 4.28E-01 |
| <b>G895</b>        | 0.34  | 6.37E-01 | 1.00E+00 | 2.31  | 2.09E-02 | 4.28E-01 |
| <b>LCT</b>         | -0.26 | 9.27E-01 | 1.00E+00 | -3.38 | 2.09E-02 | 4.28E-01 |
| <b>SCOC-AS1</b>    | 0.26  | 7.57E-01 | 1.00E+00 | -1.14 | 2.09E-02 | 4.28E-01 |
| <b>AC026412.1</b>  | -0.53 | 1.08E-01 | 1.00E+00 | -1.16 | 2.09E-02 | 4.29E-01 |
| <b>PLCXD2</b>      | 0.66  | 1.29E-01 | 1.00E+00 | 1.66  | 2.10E-02 | 4.30E-01 |
| <b>IGLV3-10</b>    | 30.00 | 3.93E-19 | 5.54E-15 | 3.17  | 2.10E-02 | 4.30E-01 |
| <b>4-Mar</b>       | -1.26 | 2.80E-01 | 1.00E+00 | 3.62  | 2.10E-02 | 4.30E-01 |
| <b>NPC1</b>        | 0.32  | 1.93E-01 | 1.00E+00 | 0.64  | 2.10E-02 | 4.30E-01 |
| <b>ATRN1</b>       | -0.47 | 6.62E-01 | 1.00E+00 | -2.49 | 2.11E-02 | 4.30E-01 |
| <b>MPV17L</b>      | -0.24 | 6.40E-01 | 1.00E+00 | -1.10 | 2.11E-02 | 4.31E-01 |
| <b>KRT77</b>       | 0.32  | 4.45E-01 | 1.00E+00 | -1.55 | 2.11E-02 | 4.31E-01 |
| <b>G10734</b>      | 0.15  | 7.43E-01 | 1.00E+00 | -1.81 | 2.12E-02 | 4.31E-01 |
| <b>FHOD1</b>       | 0.01  | 9.84E-01 | 1.00E+00 | 1.33  | 2.12E-02 | 4.32E-01 |
| <b>NDNF</b>        | 0.16  | 7.78E-01 | 1.00E+00 | -1.50 | 2.12E-02 | 4.32E-01 |
| <b>AP2S1</b>       | -0.13 | 4.93E-01 | 1.00E+00 | 0.53  | 2.14E-02 | 4.35E-01 |
| <b>CHCHD7</b>      | 0.05  | 8.15E-01 | 1.00E+00 | -0.62 | 2.15E-02 | 4.36E-01 |
| <b>RASA4DP</b>     | -0.42 | 6.41E-01 | 1.00E+00 | 1.59  | 2.15E-02 | 4.36E-01 |
| <b>C9orf139</b>    | -2.16 | 1.10E-01 | 1.00E+00 | 1.55  | 2.15E-02 | 4.36E-01 |
| <b>REEP6</b>       | -0.22 | 5.46E-01 | 1.00E+00 | -0.76 | 2.15E-02 | 4.36E-01 |
| <b>FAM83A</b>      | -0.87 | 6.23E-02 | 1.00E+00 | 2.01  | 2.15E-02 | 4.36E-01 |
| <b>KPNA5</b>       | 0.31  | 2.47E-01 | 1.00E+00 | -0.68 | 2.16E-02 | 4.36E-01 |
| <b>IGLV4-60</b>    | 1.83  | 5.90E-01 | 1.00E+00 | 5.75  | 2.16E-02 | 4.36E-01 |
| <b>SEPSECS-AS1</b> | 0.68  | 2.32E-01 | 1.00E+00 | -1.10 | 2.16E-02 | 4.36E-01 |
| <b>TOR1B</b>       | 0.21  | 3.05E-01 | 1.00E+00 | 0.52  | 2.17E-02 | 4.36E-01 |

|            |       |          |          |       |          |          |
|------------|-------|----------|----------|-------|----------|----------|
| ZNF618     | -0.48 | 6.66E-02 | 1.00E+00 | 1.15  | 2.17E-02 | 4.36E-01 |
| AK3        | 0.14  | 4.72E-01 | 1.00E+00 | -0.58 | 2.17E-02 | 4.36E-01 |
| GPR62      | -0.49 | 5.32E-01 | 1.00E+00 | -2.21 | 2.17E-02 | 4.36E-01 |
| CSNK1G1    | 0.03  | 8.91E-01 | 1.00E+00 | 0.60  | 2.17E-02 | 4.36E-01 |
| COL14A1    | 0.03  | 9.53E-01 | 1.00E+00 | 1.43  | 2.17E-02 | 4.36E-01 |
| FAM120AOS  | 0.17  | 3.61E-01 | 1.00E+00 | -0.48 | 2.18E-02 | 4.36E-01 |
| CCZ1       | -0.43 | 1.72E-01 | 1.00E+00 | -1.19 | 2.18E-02 | 4.36E-01 |
| RCHY1      | 0.44  | 1.37E-01 | 1.00E+00 | -0.81 | 2.18E-02 | 4.37E-01 |
| AL162726.3 | -0.16 | 9.62E-01 | 1.00E+00 | 2.36  | 2.18E-02 | 4.37E-01 |
| ACVRL1     | 0.49  | 2.01E-01 | 1.00E+00 | 1.50  | 2.19E-02 | 4.38E-01 |
| GLIPR1     | -0.35 | 4.03E-01 | 1.00E+00 | 0.77  | 2.19E-02 | 4.38E-01 |
| KLK6       | -2.15 | 4.07E-01 | 1.00E+00 | 1.99  | 2.19E-02 | 4.38E-01 |
| AL035563.1 | -0.39 | 5.34E-01 | 1.00E+00 | -1.43 | 2.20E-02 | 4.38E-01 |
| DLL3       | -0.82 | 7.37E-01 | 1.00E+00 | -2.67 | 2.20E-02 | 4.38E-01 |
| CARNMT1    | -0.11 | 7.25E-01 | 1.00E+00 | -0.65 | 2.20E-02 | 4.38E-01 |
| PEAK3      | 1.41  | 8.44E-02 | 1.00E+00 | 2.21  | 2.20E-02 | 4.38E-01 |
| PBX3       | -0.08 | 7.56E-01 | 1.00E+00 | -0.55 | 2.20E-02 | 4.38E-01 |
| CFHR5      | -0.80 | 8.18E-01 | 1.00E+00 | 4.42  | 2.21E-02 | 4.39E-01 |
| PTPRD      | -0.69 | 2.36E-01 | 1.00E+00 | 1.07  | 2.21E-02 | 4.39E-01 |
| LINC02580  | -0.03 | 9.70E-01 | 1.00E+00 | -1.08 | 2.21E-02 | 4.39E-01 |
| MS4A6A     | 0.25  | 6.41E-01 | 1.00E+00 | 0.96  | 2.22E-02 | 4.40E-01 |
| ZNF534     | -2.91 | 1.66E-01 | 1.00E+00 | -2.99 | 2.22E-02 | 4.40E-01 |
| RETREG1    | 0.35  | 3.38E-01 | 1.00E+00 | -0.65 | 2.22E-02 | 4.40E-01 |
| LRRC25     | -0.10 | 8.76E-01 | 1.00E+00 | 1.53  | 2.23E-02 | 4.40E-01 |
| RHOH       | 0.20  | 7.33E-01 | 1.00E+00 | 1.44  | 2.23E-02 | 4.40E-01 |
| METTL27    | 0.14  | 8.51E-01 | 1.00E+00 | 1.16  | 2.23E-02 | 4.40E-01 |
| CCNH       | 0.01  | 9.52E-01 | 1.00E+00 | -0.83 | 2.23E-02 | 4.40E-01 |
| AC011595.1 | 0.75  | 6.41E-01 | 1.00E+00 | -2.64 | 2.23E-02 | 4.40E-01 |
| TRIM5      | -0.27 | 5.37E-01 | 1.00E+00 | 0.77  | 2.24E-02 | 4.40E-01 |
| COL4A1     | 0.19  | 7.72E-01 | 1.00E+00 | 1.82  | 2.24E-02 | 4.41E-01 |
| EME2       | -0.21 | 6.54E-01 | 1.00E+00 | 1.49  | 2.24E-02 | 4.41E-01 |
| NEK10      | -0.18 | 8.85E-01 | 1.00E+00 | -2.17 | 2.25E-02 | 4.41E-01 |

|                    |       |          |          |       |          |          |
|--------------------|-------|----------|----------|-------|----------|----------|
| <b>PNRC1</b>       | -0.39 | 2.09E-01 | 1.00E+00 | -1.24 | 2.25E-02 | 4.41E-01 |
| <b>ADAP2</b>       | -0.23 | 5.27E-01 | 1.00E+00 | 0.85  | 2.25E-02 | 4.41E-01 |
| <b>TRBC2</b>       | -0.52 | 3.52E-01 | 1.00E+00 | 1.37  | 2.25E-02 | 4.41E-01 |
| <b>TIPRL</b>       | -0.06 | 7.82E-01 | 1.00E+00 | -0.38 | 2.25E-02 | 4.41E-01 |
| <b>SELPLG</b>      | -0.25 | 5.49E-01 | 1.00E+00 | 1.23  | 2.25E-02 | 4.41E-01 |
| <b>XLOC_001823</b> | -0.74 | 8.29E-01 | 1.00E+00 | -2.57 | 2.25E-02 | 4.41E-01 |
| <b>TRAV20</b>      | -1.64 | 6.25E-01 | 1.00E+00 | 3.27  | 2.26E-02 | 4.41E-01 |
| <b>RNASE6</b>      | -0.30 | 5.21E-01 | 1.00E+00 | 0.83  | 2.26E-02 | 4.41E-01 |
| <b>MXRA5</b>       | -0.37 | 2.12E-01 | 1.00E+00 | 1.34  | 2.26E-02 | 4.42E-01 |
| <b>CXCL8</b>       | -2.83 | 6.89E-02 | 1.00E+00 | 2.13  | 2.27E-02 | 4.42E-01 |
| <b>FAT1</b>        | -0.37 | 2.42E-01 | 1.00E+00 | 1.03  | 2.27E-02 | 4.42E-01 |
| <b>DECR1</b>       | -0.02 | 9.44E-01 | 1.00E+00 | -0.54 | 2.27E-02 | 4.42E-01 |
| <b>CAV2</b>        | 0.26  | 4.83E-01 | 1.00E+00 | -0.87 | 2.27E-02 | 4.42E-01 |
| <b>MGAT3</b>       | 0.03  | 9.45E-01 | 1.00E+00 | 1.74  | 2.28E-02 | 4.42E-01 |
| <b>NUTM2A-AS1</b>  | -0.19 | 5.82E-01 | 1.00E+00 | -0.55 | 2.28E-02 | 4.42E-01 |
| <b>AC009299.2</b>  | 0.90  | 5.63E-01 | 1.00E+00 | 1.71  | 2.28E-02 | 4.42E-01 |
| <b>FXYD5</b>       | -0.33 | 2.16E-01 | 1.00E+00 | 0.77  | 2.28E-02 | 4.42E-01 |
| <b>SIGLEC14</b>    | -0.08 | 9.31E-01 | 1.00E+00 | 2.25  | 2.28E-02 | 4.43E-01 |
| <b>SERTAD4</b>     | -0.03 | 9.05E-01 | 1.00E+00 | -0.80 | 2.29E-02 | 4.43E-01 |
| <b>MX1</b>         | -0.02 | 9.77E-01 | 1.00E+00 | 1.51  | 2.29E-02 | 4.43E-01 |
| <b>SPHK1</b>       | -0.29 | 8.39E-02 | 1.00E+00 | 1.40  | 2.29E-02 | 4.43E-01 |
| <b>IGLV7-43</b>    | -0.15 | 9.36E-01 | 1.00E+00 | 3.90  | 2.29E-02 | 4.43E-01 |
| <b>TDRD5</b>       | -0.14 | 8.98E-01 | 1.00E+00 | -1.97 | 2.30E-02 | 4.43E-01 |
| <b>SNX29P1</b>     | 1.74  | 4.08E-01 | 1.00E+00 | 2.56  | 2.30E-02 | 4.43E-01 |
| <b>PROX1</b>       | -0.16 | 7.37E-01 | 1.00E+00 | 1.20  | 2.30E-02 | 4.43E-01 |
| <b>HIST2H3D</b>    | -1.60 | 1.71E-01 | 1.00E+00 | -2.69 | 2.30E-02 | 4.43E-01 |
| <b>DCST2</b>       | -0.09 | 8.73E-01 | 1.00E+00 | 1.21  | 2.30E-02 | 4.43E-01 |
| <b>RLN2</b>        | 1.16  | 1.29E-01 | 1.00E+00 | -1.73 | 2.31E-02 | 4.43E-01 |
| <b>AC026310.2</b>  | NA    | NA       | NA       | 4.91  | 2.31E-02 | 4.43E-01 |
| <b>FBXO27</b>      | 0.37  | 3.12E-01 | 1.00E+00 | -0.92 | 2.31E-02 | 4.43E-01 |
| <b>ADGRB2</b>      | -0.39 | 5.78E-01 | 1.00E+00 | 1.75  | 2.31E-02 | 4.43E-01 |
| <b>POU6F2</b>      | 1.13  | 3.40E-01 | 1.00E+00 | -2.40 | 2.31E-02 | 4.43E-01 |

|                   |       |          |          |       |          |          |
|-------------------|-------|----------|----------|-------|----------|----------|
| <b>AL355309.1</b> | -2.56 | 4.53E-01 | 1.00E+00 | -1.99 | 2.31E-02 | 4.43E-01 |
| <b>SLC15A3</b>    | 0.16  | 7.44E-01 | 1.00E+00 | 2.05  | 2.32E-02 | 4.43E-01 |
| <b>AC073569.1</b> | 0.67  | 7.10E-01 | 1.00E+00 | 2.05  | 2.32E-02 | 4.43E-01 |
| <b>MDH1</b>       | 0.04  | 7.99E-01 | 1.00E+00 | -0.85 | 2.32E-02 | 4.43E-01 |
| <b>AL359258.3</b> | -1.28 | 5.21E-01 | 1.00E+00 | -2.28 | 2.32E-02 | 4.43E-01 |
| <b>AC090587.1</b> | -1.81 | 2.51E-01 | 1.00E+00 | -1.56 | 2.32E-02 | 4.43E-01 |
| <b>AC098820.1</b> | -0.85 | 8.05E-01 | 1.00E+00 | -2.87 | 2.33E-02 | 4.44E-01 |
| <b>ALOX15B</b>    | -0.14 | 7.38E-01 | 1.00E+00 | -1.43 | 2.33E-02 | 4.44E-01 |
| <b>ACP6</b>       | -0.20 | 5.94E-01 | 1.00E+00 | -1.00 | 2.34E-02 | 4.45E-01 |
| <b>LRRC1</b>      | -0.01 | 9.79E-01 | 1.00E+00 | -0.83 | 2.34E-02 | 4.45E-01 |
| <b>GGT1</b>       | 0.48  | 4.55E-01 | 1.00E+00 | 1.10  | 2.35E-02 | 4.45E-01 |
| <b>NT5E</b>       | 0.38  | 3.69E-01 | 1.00E+00 | 1.06  | 2.35E-02 | 4.45E-01 |
| <b>GCSHP5</b>     | -0.46 | 6.19E-01 | 1.00E+00 | -1.24 | 2.35E-02 | 4.45E-01 |
| <b>ACOT11</b>     | -0.74 | 1.07E-01 | 1.00E+00 | 1.62  | 2.35E-02 | 4.45E-01 |
| <b>ACRV1</b>      | -1.95 | 2.18E-01 | 1.00E+00 | 1.94  | 2.35E-02 | 4.45E-01 |
| <b>NLRP7</b>      | 0.90  | 7.96E-01 | 1.00E+00 | 3.48  | 2.35E-02 | 4.45E-01 |
| <b>HMGB1P51</b>   | 0.56  | 8.71E-01 | 1.00E+00 | 2.60  | 2.36E-02 | 4.45E-01 |
| <b>CHMP4B</b>     | -0.11 | 6.21E-01 | 1.00E+00 | 1.69  | 2.36E-02 | 4.45E-01 |
| <b>AC023509.4</b> | 0.83  | 4.10E-01 | 1.00E+00 | -1.00 | 2.36E-02 | 4.45E-01 |
| <b>PILRA</b>      | -0.98 | 4.69E-02 | 1.00E+00 | 1.59  | 2.36E-02 | 4.46E-01 |
| <b>FIGNL2</b>     | 0.21  | 7.88E-01 | 1.00E+00 | 3.15  | 2.37E-02 | 4.47E-01 |
| <b>IGHJ5</b>      | 1.29  | 7.08E-01 | 1.00E+00 | 3.38  | 2.37E-02 | 4.47E-01 |
| <b>LINC00237</b>  | -1.87 | 2.37E-01 | 1.00E+00 | -2.80 | 2.38E-02 | 4.47E-01 |
| <b>CR392039.2</b> | 1.86  | 3.59E-02 | 1.00E+00 | -2.20 | 2.38E-02 | 4.47E-01 |
| <b>AL359397.1</b> | -1.86 | 5.88E-01 | 1.00E+00 | -2.43 | 2.38E-02 | 4.47E-01 |
| <b>G42437</b>     | 1.80  | 6.00E-01 | 1.00E+00 | -3.60 | 2.39E-02 | 4.47E-01 |
| <b>TNFAIP6</b>    | 0.14  | 8.06E-01 | 1.00E+00 | 1.25  | 2.39E-02 | 4.47E-01 |
| <b>JOSD2</b>      | -0.20 | 4.79E-01 | 1.00E+00 | 0.57  | 2.39E-02 | 4.47E-01 |
| <b>AL049597.2</b> | 0.20  | 7.37E-01 | 1.00E+00 | -1.04 | 2.39E-02 | 4.47E-01 |
| <b>KLHL31</b>     | 2.28  | 2.25E-02 | 9.03E-01 | -1.75 | 2.39E-02 | 4.47E-01 |
| <b>SHISA5</b>     | 0.17  | 6.44E-01 | 1.00E+00 | 0.64  | 2.39E-02 | 4.47E-01 |
| <b>LINC00239</b>  | -0.17 | 8.38E-01 | 1.00E+00 | -1.60 | 2.39E-02 | 4.47E-01 |

|                    |       |          |          |       |          |          |
|--------------------|-------|----------|----------|-------|----------|----------|
| <b>CRLS1</b>       | 0.24  | 2.03E-01 | 1.00E+00 | -1.50 | 2.39E-02 | 4.47E-01 |
| <b>ROCR</b>        | -0.99 | 3.51E-01 | 1.00E+00 | -1.66 | 2.40E-02 | 4.47E-01 |
| <b>TRAV29DV5</b>   | 0.59  | 7.33E-01 | 1.00E+00 | 2.09  | 2.40E-02 | 4.47E-01 |
| <b>HCK</b>         | -0.52 | 2.45E-01 | 1.00E+00 | 1.26  | 2.40E-02 | 4.47E-01 |
| <b>HDDC2</b>       | 0.00  | 9.91E-01 | 1.00E+00 | -0.49 | 2.40E-02 | 4.47E-01 |
| <b>CDH11</b>       | -0.24 | 5.26E-01 | 1.00E+00 | 1.02  | 2.40E-02 | 4.47E-01 |
| <b>SUCLG1</b>      | 0.06  | 6.58E-01 | 1.00E+00 | -0.41 | 2.40E-02 | 4.47E-01 |
| <b>ADAMTS7</b>     | -0.10 | 8.80E-01 | 1.00E+00 | 1.93  | 2.41E-02 | 4.47E-01 |
| <b>AL139147.1</b>  | 0.92  | 7.41E-01 | 1.00E+00 | 4.03  | 2.41E-02 | 4.48E-01 |
| <b>XLOC_011313</b> | -0.35 | 5.52E-01 | 1.00E+00 | 1.33  | 2.42E-02 | 4.48E-01 |
| <b>MT-TC</b>       | 0.91  | 6.67E-01 | 1.00E+00 | -1.74 | 2.42E-02 | 4.48E-01 |
| <b>SLC24A2</b>     | 2.19  | 5.12E-01 | 1.00E+00 | 2.74  | 2.42E-02 | 4.49E-01 |
| <b>FAM96AP2</b>    | -0.98 | 2.76E-01 | 1.00E+00 | 1.70  | 2.43E-02 | 4.49E-01 |
| <b>SYN2</b>        | 0.01  | 9.90E-01 | 1.00E+00 | -1.50 | 2.43E-02 | 4.49E-01 |
| <b>TNFRSF17</b>    | 1.63  | 5.20E-01 | 1.00E+00 | 3.08  | 2.43E-02 | 4.49E-01 |
| <b>AC098828.1</b>  | -1.10 | 7.53E-01 | 1.00E+00 | -2.62 | 2.43E-02 | 4.49E-01 |
| <b>ANTXR1</b>      | 0.04  | 8.72E-01 | 1.00E+00 | 0.92  | 2.43E-02 | 4.49E-01 |
| <b>OSER1-DT</b>    | -0.14 | 6.44E-01 | 1.00E+00 | -0.85 | 2.44E-02 | 4.49E-01 |
| <b>HSP90AB4P</b>   | 0.30  | 8.86E-01 | 1.00E+00 | 1.92  | 2.44E-02 | 4.49E-01 |
| <b>FAM78A</b>      | 0.15  | 7.73E-01 | 1.00E+00 | 2.18  | 2.45E-02 | 4.51E-01 |
| <b>PTGDS</b>       | -1.98 | 8.16E-02 | 1.00E+00 | 1.26  | 2.45E-02 | 4.51E-01 |
| <b>STAT1</b>       | -0.06 | 9.06E-01 | 1.00E+00 | 1.23  | 2.46E-02 | 4.51E-01 |
| <b>PNRC2P1</b>     | -2.31 | 2.42E-01 | 1.00E+00 | -1.06 | 2.46E-02 | 4.51E-01 |
| <b>UBA7</b>        | 0.14  | 7.63E-01 | 1.00E+00 | 1.12  | 2.46E-02 | 4.51E-01 |
| <b>HLTF</b>        | 0.26  | 4.72E-01 | 1.00E+00 | -0.60 | 2.46E-02 | 4.51E-01 |
| <b>ELOVL5</b>      | 0.98  | 1.12E-01 | 1.00E+00 | -1.34 | 2.46E-02 | 4.51E-01 |
| <b>FOXN3</b>       | 0.06  | 7.81E-01 | 1.00E+00 | -0.54 | 2.46E-02 | 4.51E-01 |
| <b>AEBP1</b>       | 0.24  | 6.54E-01 | 1.00E+00 | 1.55  | 2.47E-02 | 4.52E-01 |
| <b>FBXL22</b>      | -0.45 | 3.40E-01 | 1.00E+00 | -1.11 | 2.47E-02 | 4.52E-01 |
| <b>SDHD</b>        | 0.03  | 9.05E-01 | 1.00E+00 | -1.08 | 2.47E-02 | 4.52E-01 |
| <b>TBXAS1</b>      | -0.10 | 8.49E-01 | 1.00E+00 | 1.29  | 2.48E-02 | 4.52E-01 |
| <b>AC097059.2</b>  | 1.15  | 6.28E-01 | 1.00E+00 | 3.62  | 2.48E-02 | 4.52E-01 |

|                   |       |          |          |       |          |          |
|-------------------|-------|----------|----------|-------|----------|----------|
| <b>SNX20</b>      | -0.70 | 3.10E-01 | 1.00E+00 | 1.73  | 2.48E-02 | 4.52E-01 |
| <b>GABRB1</b>     | -0.82 | 6.71E-01 | 1.00E+00 | -2.87 | 2.48E-02 | 4.52E-01 |
| <b>INKA2-AS1</b>  | -2.86 | 4.00E-01 | 1.00E+00 | -2.65 | 2.49E-02 | 4.52E-01 |
| <b>PNP</b>        | -0.86 | 7.93E-02 | 1.00E+00 | 0.73  | 2.49E-02 | 4.52E-01 |
| <b>AC116651.1</b> | -1.04 | 7.46E-01 | 1.00E+00 | -2.68 | 2.49E-02 | 4.52E-01 |
| <b>CLCF1</b>      | -1.25 | 2.88E-02 | 9.88E-01 | 1.49  | 2.49E-02 | 4.52E-01 |
| <b>DIO2</b>       | -0.28 | 4.78E-01 | 1.00E+00 | 1.19  | 2.49E-02 | 4.52E-01 |
| <b>NID1</b>       | 0.47  | 3.02E-01 | 1.00E+00 | 1.32  | 2.49E-02 | 4.52E-01 |
| <b>HAVCR2</b>     | 0.49  | 3.81E-01 | 1.00E+00 | 1.38  | 2.50E-02 | 4.52E-01 |
| <b>PKD1P1</b>     | -0.50 | 2.20E-01 | 1.00E+00 | 2.01  | 2.50E-02 | 4.52E-01 |
| <b>PRRT3-AS1</b>  | 1.67  | 1.41E-01 | 1.00E+00 | -1.52 | 2.50E-02 | 4.52E-01 |
| <b>CCDC58</b>     | 0.00  | 9.93E-01 | 1.00E+00 | -1.16 | 2.50E-02 | 4.52E-01 |
| <b>AC011005.1</b> | -0.30 | 8.40E-01 | 1.00E+00 | -1.31 | 2.51E-02 | 4.54E-01 |
| <b>TBC1D16</b>    | 0.36  | 4.11E-01 | 1.00E+00 | 0.96  | 2.52E-02 | 4.54E-01 |
| <b>TRAV13-2</b>   | 1.38  | 5.93E-01 | 1.00E+00 | 2.81  | 2.52E-02 | 4.54E-01 |
| <b>TNFSF10</b>    | -0.09 | 8.42E-01 | 1.00E+00 | 0.79  | 2.52E-02 | 4.54E-01 |
| <b>1-Mar</b>      | -0.06 | 8.92E-01 | 1.00E+00 | 1.16  | 2.53E-02 | 4.54E-01 |
| <b>G39123</b>     | 1.57  | 6.35E-01 | 1.00E+00 | -2.41 | 2.53E-02 | 4.54E-01 |
| <b>PLPPR4</b>     | -0.32 | 4.80E-01 | 1.00E+00 | 0.91  | 2.53E-02 | 4.54E-01 |
| <b>AC231533.2</b> | -1.37 | 6.93E-01 | 1.00E+00 | -1.59 | 2.53E-02 | 4.54E-01 |
| <b>AC104758.2</b> | -0.50 | 7.47E-01 | 1.00E+00 | 2.59  | 2.53E-02 | 4.54E-01 |
| <b>USP3-AS1</b>   | -0.64 | 6.85E-01 | 1.00E+00 | -1.95 | 2.53E-02 | 4.55E-01 |
| <b>AC020763.3</b> | -2.46 | 4.32E-02 | 1.00E+00 | 2.14  | 2.54E-02 | 4.55E-01 |
| <b>JTB</b>        | -0.24 | 6.39E-01 | 1.00E+00 | -1.38 | 2.54E-02 | 4.55E-01 |
| <b>AP003390.1</b> | 0.26  | 6.45E-01 | 1.00E+00 | 1.45  | 2.54E-02 | 4.55E-01 |
| <b>STX5</b>       | -0.04 | 7.57E-01 | 1.00E+00 | 0.34  | 2.54E-02 | 4.55E-01 |
| <b>AC211433.1</b> | 1.29  | 7.02E-01 | 1.00E+00 | 2.26  | 2.54E-02 | 4.55E-01 |
| <b>ZNF529-AS1</b> | 0.12  | 8.29E-01 | 1.00E+00 | -0.93 | 2.54E-02 | 4.55E-01 |
| <b>TRAV12-2</b>   | -2.36 | 1.69E-01 | 1.00E+00 | 2.40  | 2.55E-02 | 4.55E-01 |
| <b>IL15RA</b>     | 0.34  | 3.55E-01 | 1.00E+00 | 0.82  | 2.55E-02 | 4.55E-01 |
| <b>AC009078.3</b> | 2.08  | 7.70E-02 | 1.00E+00 | -3.08 | 2.55E-02 | 4.55E-01 |
| <b>PSMB10</b>     | -0.52 | 1.09E-01 | 1.00E+00 | 0.77  | 2.55E-02 | 4.55E-01 |



|                    |       |          |          |       |          |          |
|--------------------|-------|----------|----------|-------|----------|----------|
| <b>XLOC_006336</b> | -0.69 | 4.24E-01 | 1.00E+00 | 1.33  | 2.56E-02 | 4.55E-01 |
| <b>IFI35</b>       | 0.14  | 7.81E-01 | 1.00E+00 | 1.03  | 2.56E-02 | 4.55E-01 |
| <b>PIK3AP1</b>     | 0.44  | 4.54E-01 | 1.00E+00 | 1.65  | 2.56E-02 | 4.55E-01 |
| <b>TRAV21</b>      | 0.60  | 6.17E-01 | 1.00E+00 | 2.05  | 2.56E-02 | 4.55E-01 |
| <b>ZSCAN4</b>      | 1.16  | 3.36E-01 | 1.00E+00 | -3.48 | 2.56E-02 | 4.55E-01 |
| <b>AP001972.5</b>  | 1.03  | 4.40E-02 | 1.00E+00 | 0.82  | 2.57E-02 | 4.56E-01 |
| <b>HEPH</b>        | 0.29  | 5.02E-01 | 1.00E+00 | 1.23  | 2.57E-02 | 4.56E-01 |
| <b>MEGF8</b>       | 0.08  | 8.68E-01 | 1.00E+00 | 1.45  | 2.57E-02 | 4.56E-01 |
| <b>NCALD</b>       | 0.50  | 5.10E-01 | 1.00E+00 | -0.91 | 2.58E-02 | 4.56E-01 |
| <b>PABPC4</b>      | -0.05 | 8.21E-01 | 1.00E+00 | 0.85  | 2.58E-02 | 4.56E-01 |
| <b>GIPC2</b>       | 0.24  | 4.90E-01 | 1.00E+00 | -0.88 | 2.58E-02 | 4.56E-01 |
| <b>CMIP</b>        | -0.32 | 2.13E-01 | 1.00E+00 | 1.70  | 2.58E-02 | 4.56E-01 |
| <b>XLOC_006166</b> | -1.18 | 5.97E-01 | 1.00E+00 | -2.02 | 2.58E-02 | 4.56E-01 |
| <b>MTND5P2</b>     | NA    | NA       | NA       | 2.79  | 2.59E-02 | 4.57E-01 |
| <b>MTURN</b>       | 0.35  | 5.05E-01 | 1.00E+00 | -0.94 | 2.59E-02 | 4.57E-01 |
| <b>MYO15B</b>      | -0.21 | 6.52E-01 | 1.00E+00 | 1.87  | 2.59E-02 | 4.57E-01 |
| <b>CEMIP2</b>      | 0.32  | 4.47E-01 | 1.00E+00 | 1.32  | 2.60E-02 | 4.57E-01 |
| <b>PEX3</b>        | -0.26 | 4.05E-01 | 1.00E+00 | -0.73 | 2.60E-02 | 4.58E-01 |
| <b>FGD3</b>        | -0.59 | 1.22E-01 | 1.00E+00 | 1.22  | 2.60E-02 | 4.58E-01 |
| <b>UBE2E2</b>      | -0.09 | 7.16E-01 | 1.00E+00 | -0.58 | 2.61E-02 | 4.58E-01 |
| <b>GRAMD1B</b>     | -0.73 | 2.50E-01 | 1.00E+00 | 2.51  | 2.61E-02 | 4.58E-01 |
| <b>MAL2</b>        | 0.28  | 5.27E-01 | 1.00E+00 | -1.11 | 2.61E-02 | 4.58E-01 |
| <b>PLTP</b>        | 0.20  | 6.17E-01 | 1.00E+00 | 0.88  | 2.62E-02 | 4.58E-01 |
| <b>CADM2</b>       | -0.36 | 4.89E-01 | 1.00E+00 | -1.41 | 2.62E-02 | 4.58E-01 |
| <b>AL049838.1</b>  | -0.86 | 2.30E-01 | 1.00E+00 | -1.55 | 2.62E-02 | 4.58E-01 |
| <b>SEC14L4</b>     | 1.49  | 2.18E-01 | 1.00E+00 | -2.50 | 2.62E-02 | 4.58E-01 |
| <b>SIDT2</b>       | 0.13  | 5.45E-01 | 1.00E+00 | 0.84  | 2.63E-02 | 4.58E-01 |
| <b>CCDC154</b>     | -2.55 | 1.38E-01 | 1.00E+00 | 3.90  | 2.63E-02 | 4.58E-01 |
| <b>ALDOC</b>       | 0.33  | 3.86E-01 | 1.00E+00 | -0.90 | 2.63E-02 | 4.58E-01 |
| <b>HAGHL</b>       | -0.60 | 2.24E-01 | 1.00E+00 | 1.41  | 2.63E-02 | 4.58E-01 |
| <b>AC053503.2</b>  | -1.53 | 6.53E-01 | 1.00E+00 | 3.49  | 2.63E-02 | 4.58E-01 |
| <b>CCDC122</b>     | -0.42 | 2.99E-01 | 1.00E+00 | -0.66 | 2.63E-02 | 4.58E-01 |

|             |       |          |          |       |          |          |
|-------------|-------|----------|----------|-------|----------|----------|
| CD74        | -0.56 | 7.31E-02 | 1.00E+00 | 0.80  | 2.64E-02 | 4.59E-01 |
| LIPT1       | 0.10  | 7.64E-01 | 1.00E+00 | -0.90 | 2.64E-02 | 4.59E-01 |
| CSNK1E      | 0.10  | 6.94E-01 | 1.00E+00 | 0.51  | 2.64E-02 | 4.59E-01 |
| ADGRE2      | -0.09 | 8.65E-01 | 1.00E+00 | 1.27  | 2.65E-02 | 4.60E-01 |
| SNHG9       | 0.56  | 5.11E-01 | 1.00E+00 | -1.32 | 2.65E-02 | 4.60E-01 |
| RABL3       | 0.11  | 5.97E-01 | 1.00E+00 | -0.63 | 2.66E-02 | 4.60E-01 |
| LINC01607   | -0.14 | 8.98E-01 | 1.00E+00 | -1.90 | 2.66E-02 | 4.60E-01 |
| UBE2E3      | -0.02 | 9.28E-01 | 1.00E+00 | -0.60 | 2.66E-02 | 4.60E-01 |
| AC016727.1  | -0.20 | 6.88E-01 | 1.00E+00 | -0.90 | 2.66E-02 | 4.60E-01 |
| AL359317.1  | -2.57 | 1.68E-01 | 1.00E+00 | -2.18 | 2.67E-02 | 4.61E-01 |
| SMAD1       | 0.03  | 8.94E-01 | 1.00E+00 | -0.49 | 2.67E-02 | 4.61E-01 |
| XLOC_013276 | 0.25  | 7.47E-01 | 1.00E+00 | -1.81 | 2.67E-02 | 4.61E-01 |
| EVL         | -0.36 | 1.54E-01 | 1.00E+00 | 1.43  | 2.67E-02 | 4.61E-01 |
| AC243829.4  | -2.94 | 3.87E-01 | 1.00E+00 | 3.44  | 2.67E-02 | 4.61E-01 |
| MYBPHL      | -0.14 | 9.68E-01 | 1.00E+00 | 2.78  | 2.68E-02 | 4.62E-01 |
| ZCCHC2      | -0.10 | 7.99E-01 | 1.00E+00 | 1.00  | 2.69E-02 | 4.62E-01 |
| PAX1        | 0.09  | 9.12E-01 | 1.00E+00 | 2.91  | 2.69E-02 | 4.62E-01 |
| USP18       | 0.02  | 9.77E-01 | 1.00E+00 | 1.34  | 2.69E-02 | 4.63E-01 |
| RALGPS1     | -0.10 | 6.06E-01 | 1.00E+00 | -0.80 | 2.71E-02 | 4.65E-01 |
| AC104083.1  | -0.47 | 3.74E-01 | 1.00E+00 | 1.03  | 2.71E-02 | 4.65E-01 |
| CSMD2       | -1.02 | 2.13E-01 | 1.00E+00 | 1.69  | 2.71E-02 | 4.65E-01 |
| IKBKG       | 0.05  | 8.05E-01 | 1.00E+00 | 0.49  | 2.72E-02 | 4.65E-01 |
| AC004687.1  | 1.00  | 6.32E-01 | 1.00E+00 | 3.95  | 2.72E-02 | 4.65E-01 |
| RIN3        | -0.37 | 2.19E-01 | 1.00E+00 | 1.33  | 2.72E-02 | 4.65E-01 |
| RUNX1       | -0.21 | 6.28E-01 | 1.00E+00 | 1.38  | 2.72E-02 | 4.65E-01 |
| VAMP3       | -0.13 | 4.21E-01 | 1.00E+00 | -0.43 | 2.72E-02 | 4.65E-01 |
| ZNF204P     | 0.38  | 2.86E-01 | 1.00E+00 | -1.02 | 2.72E-02 | 4.65E-01 |
| LY86        | -1.10 | 1.35E-02 | 7.28E-01 | 1.06  | 2.73E-02 | 4.67E-01 |
| AC104692.2  | NA    | NA       | NA       | 4.27  | 2.74E-02 | 4.67E-01 |
| AC068831.1  | 0.42  | 8.50E-01 | 1.00E+00 | 2.43  | 2.74E-02 | 4.67E-01 |
| SEZ6L2      | -1.80 | 1.43E-05 | 4.42E-03 | 1.46  | 2.75E-02 | 4.68E-01 |
| MASTL       | -0.45 | 1.62E-01 | 1.00E+00 | 0.78  | 2.75E-02 | 4.68E-01 |

|             |       |          |          |       |          |          |
|-------------|-------|----------|----------|-------|----------|----------|
| TPRG1-AS1   | 1.88  | 5.87E-02 | 1.00E+00 | -1.55 | 2.76E-02 | 4.69E-01 |
| KIF3B       | -0.01 | 9.69E-01 | 1.00E+00 | 0.63  | 2.76E-02 | 4.69E-01 |
| SCGB1D2     | -0.40 | 7.74E-01 | 1.00E+00 | -2.04 | 2.76E-02 | 4.69E-01 |
| ANKRD36BP2  | 1.14  | 1.15E-01 | 1.00E+00 | -2.40 | 2.77E-02 | 4.70E-01 |
| UBXN6       | 0.05  | 8.36E-01 | 1.00E+00 | 1.02  | 2.77E-02 | 4.70E-01 |
| FCN1        | 0.93  | 1.21E-01 | 1.00E+00 | 1.65  | 2.77E-02 | 4.70E-01 |
| CKLF        | -0.28 | 9.34E-01 | 1.00E+00 | -1.84 | 2.78E-02 | 4.70E-01 |
| ELFN1       | -1.26 | 3.11E-05 | 8.71E-03 | 2.20  | 2.78E-02 | 4.70E-01 |
| LCMT2       | -0.06 | 7.74E-01 | 1.00E+00 | 0.56  | 2.78E-02 | 4.70E-01 |
| AC078883.2  | -2.59 | 4.27E-01 | 1.00E+00 | -2.50 | 2.78E-02 | 4.70E-01 |
| COL6A1      | -0.14 | 7.67E-01 | 1.00E+00 | 1.58  | 2.78E-02 | 4.70E-01 |
| ULBP2       | -1.25 | 3.45E-01 | 1.00E+00 | 1.70  | 2.79E-02 | 4.70E-01 |
| GDNF        | -0.63 | 3.16E-01 | 1.00E+00 | 1.79  | 2.79E-02 | 4.70E-01 |
| HSD17B13    | 2.25  | 7.59E-04 | 1.35E-01 | -1.86 | 2.79E-02 | 4.70E-01 |
| FAM83A-AS1  | -0.93 | 3.77E-01 | 1.00E+00 | 2.51  | 2.79E-02 | 4.70E-01 |
| COL11A1     | 0.43  | 7.53E-01 | 1.00E+00 | 1.91  | 2.79E-02 | 4.70E-01 |
| AC109826.1  | 2.58  | 1.32E-01 | 1.00E+00 | 2.55  | 2.79E-02 | 4.70E-01 |
| XLOC_012881 | -0.31 | 8.92E-01 | 1.00E+00 | 2.59  | 2.79E-02 | 4.70E-01 |
| AL591806.1  | -0.70 | 5.06E-01 | 1.00E+00 | -2.32 | 2.80E-02 | 4.70E-01 |
| TLR4        | 0.57  | 2.00E-01 | 1.00E+00 | 1.22  | 2.80E-02 | 4.70E-01 |
| AL137802.2  | 1.31  | 7.05E-01 | 1.00E+00 | -2.65 | 2.80E-02 | 4.70E-01 |
| C2          | 0.00  | 9.95E-01 | 1.00E+00 | 1.39  | 2.80E-02 | 4.70E-01 |
| ST20        | -2.19 | 5.19E-01 | 1.00E+00 | -1.38 | 2.80E-02 | 4.70E-01 |
| PPID        | 0.25  | 3.85E-01 | 1.00E+00 | -0.43 | 2.80E-02 | 4.70E-01 |
| CBLB        | 0.54  | 1.04E-01 | 1.00E+00 | 0.80  | 2.81E-02 | 4.70E-01 |
| ECHDC3      | -0.25 | 5.12E-01 | 1.00E+00 | -1.45 | 2.81E-02 | 4.70E-01 |
| ATP1B3      | -0.35 | 6.93E-02 | 1.00E+00 | -0.67 | 2.81E-02 | 4.70E-01 |
| DUS4L       | -0.11 | 7.25E-01 | 1.00E+00 | -0.54 | 2.82E-02 | 4.70E-01 |
| OAT         | -0.07 | 6.99E-01 | 1.00E+00 | -0.47 | 2.82E-02 | 4.71E-01 |
| RGCC        | 0.48  | 3.16E-01 | 1.00E+00 | -1.45 | 2.82E-02 | 4.71E-01 |
| TRAM2       | 0.25  | 3.82E-01 | 1.00E+00 | 1.00  | 2.82E-02 | 4.71E-01 |
| CETN2       | 0.08  | 7.10E-01 | 1.00E+00 | -0.43 | 2.83E-02 | 4.71E-01 |

|                    |       |          |          |       |          |          |
|--------------------|-------|----------|----------|-------|----------|----------|
| <b>AP002360.1</b>  | 0.19  | 6.52E-01 | 1.00E+00 | -0.82 | 2.83E-02 | 4.71E-01 |
| <b>GOLT1A</b>      | -0.51 | 6.02E-01 | 1.00E+00 | -2.22 | 2.83E-02 | 4.71E-01 |
| <b>CD5L</b>        | 0.59  | 8.51E-01 | 1.00E+00 | 4.16  | 2.83E-02 | 4.71E-01 |
| <b>XLOC_009145</b> | 0.11  | 7.86E-01 | 1.00E+00 | -0.67 | 2.84E-02 | 4.71E-01 |
| <b>CALCA</b>       | -0.87 | 8.02E-01 | 1.00E+00 | 3.97  | 2.84E-02 | 4.71E-01 |
| <b>CR381653.1</b>  | -0.01 | 9.84E-01 | 1.00E+00 | -0.87 | 2.84E-02 | 4.71E-01 |
| <b>MAFK</b>        | -0.36 | 1.31E-01 | 1.00E+00 | 2.14  | 2.84E-02 | 4.71E-01 |
| <b>SLC45A3</b>     | -0.17 | 6.36E-01 | 1.00E+00 | 1.22  | 2.85E-02 | 4.72E-01 |
| <b>NFS1</b>        | 0.03  | 9.12E-01 | 1.00E+00 | -0.73 | 2.85E-02 | 4.72E-01 |
| <b>MMP10</b>       | -1.37 | 6.93E-01 | 1.00E+00 | 3.68  | 2.86E-02 | 4.74E-01 |
| <b>AL591485.1</b>  | -0.16 | 6.37E-01 | 1.00E+00 | -1.11 | 2.87E-02 | 4.74E-01 |
| <b>NMNAT3</b>      | 0.46  | 1.93E-01 | 1.00E+00 | -0.73 | 2.87E-02 | 4.74E-01 |
| <b>ZNF804A</b>     | -1.73 | 2.83E-01 | 1.00E+00 | 3.17  | 2.87E-02 | 4.74E-01 |
| <b>PLEKHG7</b>     | -2.19 | 5.23E-01 | 1.00E+00 | 2.89  | 2.87E-02 | 4.74E-01 |
| <b>PREX1</b>       | -0.01 | 9.84E-01 | 1.00E+00 | 1.63  | 2.88E-02 | 4.74E-01 |
| <b>NOA1</b>        | -0.32 | 1.68E-01 | 1.00E+00 | 0.42  | 2.88E-02 | 4.74E-01 |
| <b>GALNS</b>       | -0.11 | 7.52E-01 | 1.00E+00 | 0.92  | 2.88E-02 | 4.74E-01 |
| <b>DDC</b>         | -1.74 | 2.19E-01 | 1.00E+00 | -3.85 | 2.88E-02 | 4.74E-01 |
| <b>FAM241A</b>     | 0.03  | 9.17E-01 | 1.00E+00 | -1.21 | 2.89E-02 | 4.74E-01 |
| <b>FUZ</b>         | 0.11  | 6.94E-01 | 1.00E+00 | 0.55  | 2.89E-02 | 4.74E-01 |
| <b>PRAM1</b>       | -0.80 | 3.58E-01 | 1.00E+00 | 2.53  | 2.89E-02 | 4.74E-01 |
| <b>ABCG4</b>       | -1.63 | 8.44E-02 | 1.00E+00 | 2.86  | 2.89E-02 | 4.74E-01 |
| <b>RTN4IP1</b>     | -0.11 | 6.86E-01 | 1.00E+00 | -0.60 | 2.90E-02 | 4.74E-01 |
| <b>AC084809.2</b>  | 1.86  | 2.50E-01 | 1.00E+00 | 1.78  | 2.90E-02 | 4.74E-01 |
| <b>EGR2</b>        | -0.32 | 5.61E-01 | 1.00E+00 | 0.99  | 2.90E-02 | 4.74E-01 |
| <b>RTN4R</b>       | -0.30 | 3.65E-01 | 1.00E+00 | -1.15 | 2.90E-02 | 4.74E-01 |
| <b>IFI16</b>       | -0.34 | 3.85E-01 | 1.00E+00 | 0.77  | 2.90E-02 | 4.74E-01 |
| <b>G6339</b>       | 0.48  | 6.77E-01 | 1.00E+00 | -2.22 | 2.90E-02 | 4.74E-01 |
| <b>ARTN</b>        | -0.93 | 2.29E-01 | 1.00E+00 | 2.61  | 2.90E-02 | 4.74E-01 |
| <b>AL358852.1</b>  | -2.84 | 7.88E-02 | 1.00E+00 | -1.39 | 2.90E-02 | 4.74E-01 |
| <b>LINC00906</b>   | 3.96  | 3.42E-02 | 1.00E+00 | 3.26  | 2.91E-02 | 4.75E-01 |
| <b>CR769775.1</b>  | -0.97 | 2.17E-01 | 1.00E+00 | -1.37 | 2.91E-02 | 4.75E-01 |

|            |       |          |          |       |          |          |
|------------|-------|----------|----------|-------|----------|----------|
| USF1       | 0.14  | 5.90E-01 | 1.00E+00 | 2.04  | 2.92E-02 | 4.75E-01 |
| GAPT       | 1.06  | 2.01E-01 | 1.00E+00 | 1.16  | 2.92E-02 | 4.75E-01 |
| AL049637.1 | 1.18  | 7.26E-01 | 1.00E+00 | -3.47 | 2.92E-02 | 4.75E-01 |
| ATP5ME     | 0.31  | 3.36E-01 | 1.00E+00 | -1.50 | 2.92E-02 | 4.75E-01 |
| IFI6       | 0.29  | 7.87E-01 | 1.00E+00 | 1.68  | 2.93E-02 | 4.75E-01 |
| RAB17      | 0.04  | 9.55E-01 | 1.00E+00 | -1.12 | 2.93E-02 | 4.76E-01 |
| CD93       | 0.13  | 8.13E-01 | 1.00E+00 | 1.39  | 2.93E-02 | 4.76E-01 |
| SH3D21     | -0.64 | 2.91E-02 | 9.89E-01 | 1.45  | 2.94E-02 | 4.77E-01 |
| JOSD1      | -0.15 | 4.17E-01 | 1.00E+00 | 1.06  | 2.94E-02 | 4.77E-01 |
| MPC1       | 0.02  | 9.45E-01 | 1.00E+00 | -0.67 | 2.94E-02 | 4.77E-01 |
| CD44-AS1   | -0.87 | 6.95E-01 | 1.00E+00 | 1.73  | 2.95E-02 | 4.77E-01 |
| AC092135.3 | 2.28  | 1.19E-01 | 1.00E+00 | 3.39  | 2.96E-02 | 4.78E-01 |
| MIR3687    | -0.33 | 5.73E-01 | 1.00E+00 | -3.33 | 2.96E-02 | 4.78E-01 |
| AC135178.1 | -0.83 | 4.10E-01 | 1.00E+00 | 2.01  | 2.96E-02 | 4.78E-01 |
| YBX3P1     | 0.15  | 9.35E-01 | 1.00E+00 | -1.71 | 2.96E-02 | 4.78E-01 |
| SUGT1P2    | -0.80 | 8.18E-01 | 1.00E+00 | 2.74  | 2.96E-02 | 4.78E-01 |
| PXDN       | 0.79  | 2.43E-01 | 1.00E+00 | 1.42  | 2.97E-02 | 4.79E-01 |
| HEXA-AS1   | -1.25 | 1.41E-01 | 1.00E+00 | -1.78 | 2.97E-02 | 4.79E-01 |
| TAF11      | 0.38  | 2.01E-01 | 1.00E+00 | 0.30  | 2.98E-02 | 4.79E-01 |
| CDK5R1     | -1.17 | 1.91E-03 | 2.39E-01 | 1.66  | 2.98E-02 | 4.79E-01 |
| CATSPER1   | -0.45 | 6.17E-01 | 1.00E+00 | 1.38  | 2.98E-02 | 4.79E-01 |
| FAM184B    | -0.42 | 5.20E-01 | 1.00E+00 | -1.37 | 2.98E-02 | 4.79E-01 |
| AC080080.1 | -0.43 | 5.52E-01 | 1.00E+00 | -2.01 | 2.98E-02 | 4.79E-01 |
| DDX39B     | 0.24  | 6.69E-01 | 1.00E+00 | 1.24  | 2.99E-02 | 4.79E-01 |
| CCSER1     | -0.75 | 1.12E-01 | 1.00E+00 | -1.01 | 2.99E-02 | 4.79E-01 |
| NFYB       | 0.32  | 2.59E-01 | 1.00E+00 | -0.47 | 2.99E-02 | 4.79E-01 |
| SUN1       | -0.04 | 8.23E-01 | 1.00E+00 | -0.35 | 2.99E-02 | 4.79E-01 |
| ORAI2      | 0.03  | 9.42E-01 | 1.00E+00 | 1.37  | 3.00E-02 | 4.80E-01 |
| ZNF92      | -0.07 | 8.62E-01 | 1.00E+00 | -0.94 | 3.00E-02 | 4.80E-01 |
| LINC02487  | 0.58  | 7.24E-01 | 1.00E+00 | 2.83  | 3.01E-02 | 4.80E-01 |
| CCL3L1     | 0.49  | 8.88E-01 | 1.00E+00 | 2.14  | 3.01E-02 | 4.82E-01 |
| IQSEC2     | -0.49 | 6.77E-02 | 1.00E+00 | 0.95  | 3.02E-02 | 4.83E-01 |

|                    |        |          |          |       |          |          |
|--------------------|--------|----------|----------|-------|----------|----------|
| <b>NALCN</b>       | -0.73  | 2.94E-01 | 1.00E+00 | -1.69 | 3.03E-02 | 4.83E-01 |
| <b>SYK</b>         | 0.11   | 6.97E-01 | 1.00E+00 | 0.80  | 3.03E-02 | 4.83E-01 |
| <b>TRANK1</b>      | -0.29  | 6.69E-01 | 1.00E+00 | 1.60  | 3.04E-02 | 4.84E-01 |
| <b>AC130371.2</b>  | -0.03  | 9.53E-01 | 1.00E+00 | 1.93  | 3.04E-02 | 4.84E-01 |
| <b>MAPK6</b>       | -0.11  | 7.76E-01 | 1.00E+00 | 0.56  | 3.04E-02 | 4.84E-01 |
| <b>ATAD1</b>       | 0.21   | 3.30E-01 | 1.00E+00 | -0.41 | 3.04E-02 | 4.84E-01 |
| <b>HMOX1</b>       | -0.34  | 5.56E-01 | 1.00E+00 | 1.16  | 3.04E-02 | 4.84E-01 |
| <b>AL121820.2</b>  | -1.77  | 6.24E-02 | 1.00E+00 | -1.28 | 3.05E-02 | 4.84E-01 |
| <b>AL050327.1</b>  | 2.74   | 4.20E-01 | 1.00E+00 | -3.10 | 3.05E-02 | 4.84E-01 |
| <b>G4615</b>       | -14.72 | 1.70E-05 | 5.09E-03 | -1.86 | 3.06E-02 | 4.84E-01 |
| <b>AC017104.5</b>  | 1.03   | 4.54E-01 | 1.00E+00 | -1.97 | 3.06E-02 | 4.84E-01 |
| <b>TMEM68</b>      | 0.24   | 4.59E-01 | 1.00E+00 | -0.76 | 3.06E-02 | 4.84E-01 |
| <b>TRDV2</b>       | -0.67  | 8.47E-01 | 1.00E+00 | 3.91  | 3.06E-02 | 4.84E-01 |
| <b>ZC3H7B</b>      | 0.03   | 8.95E-01 | 1.00E+00 | 1.83  | 3.07E-02 | 4.86E-01 |
| <b>BNC2-AS1</b>    | -2.19  | 9.60E-03 | 6.08E-01 | -1.43 | 3.07E-02 | 4.86E-01 |
| <b>XLOC_008233</b> | -0.23  | 8.17E-01 | 1.00E+00 | -1.16 | 3.08E-02 | 4.86E-01 |
| <b>FAM210B</b>     | -0.07  | 6.83E-01 | 1.00E+00 | -0.88 | 3.08E-02 | 4.86E-01 |
| <b>KIAA1024</b>    | -0.06  | 8.97E-01 | 1.00E+00 | 2.10  | 3.09E-02 | 4.86E-01 |
| <b>LILRB3</b>      | -0.59  | 4.79E-01 | 1.00E+00 | 1.97  | 3.09E-02 | 4.86E-01 |
| <b>PTPA</b>        | -0.12  | 5.62E-01 | 1.00E+00 | 0.79  | 3.09E-02 | 4.86E-01 |
| <b>XLOC_003146</b> | -1.80  | 6.02E-01 | 1.00E+00 | 3.73  | 3.09E-02 | 4.86E-01 |
| <b>AL158825.2</b>  | -1.05  | 3.19E-01 | 1.00E+00 | 1.43  | 3.09E-02 | 4.86E-01 |
| <b>RFX1</b>        | -0.27  | 3.88E-01 | 1.00E+00 | 1.37  | 3.09E-02 | 4.86E-01 |
| <b>TMC8</b>        | -0.95  | 8.19E-02 | 1.00E+00 | 1.51  | 3.09E-02 | 4.86E-01 |
| <b>TGDS</b>        | 0.36   | 1.88E-01 | 1.00E+00 | -0.71 | 3.10E-02 | 4.86E-01 |
| <b>GBGT1</b>       | 0.18   | 7.62E-01 | 1.00E+00 | 1.67  | 3.10E-02 | 4.86E-01 |
| <b>IFI27</b>       | 0.14   | 8.41E-01 | 1.00E+00 | 1.25  | 3.10E-02 | 4.86E-01 |
| <b>RIPOR1</b>      | -0.08  | 8.19E-01 | 1.00E+00 | 1.23  | 3.10E-02 | 4.86E-01 |
| <b>G33524</b>      | -1.32  | 4.53E-01 | 1.00E+00 | 2.13  | 3.10E-02 | 4.86E-01 |
| <b>PVT1</b>        | -0.95  | 6.32E-02 | 1.00E+00 | 1.13  | 3.11E-02 | 4.86E-01 |
| <b>AL391421.1</b>  | 0.12   | 9.09E-01 | 1.00E+00 | 2.26  | 3.11E-02 | 4.86E-01 |
| <b>TMEM256</b>     | 0.15   | 8.24E-01 | 1.00E+00 | -1.39 | 3.11E-02 | 4.86E-01 |

|            |       |          |          |       |          |          |
|------------|-------|----------|----------|-------|----------|----------|
| PPARG      | 2.13  | 1.16E-02 | 6.66E-01 | -1.44 | 3.11E-02 | 4.86E-01 |
| SLC35C2    | -0.17 | 2.92E-01 | 1.00E+00 | 0.23  | 3.12E-02 | 4.87E-01 |
| CMKLR1     | 0.31  | 4.55E-01 | 1.00E+00 | 1.34  | 3.13E-02 | 4.88E-01 |
| ICAM3      | -0.84 | 3.84E-01 | 1.00E+00 | 1.21  | 3.13E-02 | 4.88E-01 |
| NRROS      | 0.12  | 8.29E-01 | 1.00E+00 | 1.92  | 3.13E-02 | 4.88E-01 |
| HESX1      | -1.43 | 6.67E-02 | 1.00E+00 | 1.15  | 3.13E-02 | 4.88E-01 |
| AP1S1      | -0.22 | 5.12E-01 | 1.00E+00 | 0.90  | 3.13E-02 | 4.88E-01 |
| ACOT7      | -0.48 | 1.15E-01 | 1.00E+00 | 0.67  | 3.14E-02 | 4.89E-01 |
| PRR3       | -0.02 | 9.60E-01 | 1.00E+00 | 0.78  | 3.15E-02 | 4.89E-01 |
| AC024361.2 | 0.94  | 5.79E-01 | 1.00E+00 | -2.44 | 3.15E-02 | 4.90E-01 |
| AL031123.1 | -1.61 | 5.10E-02 | 1.00E+00 | -1.37 | 3.15E-02 | 4.90E-01 |
| GJB6       | -0.74 | 6.17E-02 | 1.00E+00 | 1.51  | 3.16E-02 | 4.90E-01 |
| TMEM176B   | 0.14  | 6.95E-01 | 1.00E+00 | 1.12  | 3.16E-02 | 4.90E-01 |
| RNF139-AS1 | -2.29 | 3.65E-02 | 1.00E+00 | 1.98  | 3.16E-02 | 4.90E-01 |
| HADH       | 0.35  | 2.75E-01 | 1.00E+00 | -0.57 | 3.16E-02 | 4.90E-01 |
| TNFRSF21   | 0.34  | 4.19E-01 | 1.00E+00 | 1.01  | 3.16E-02 | 4.90E-01 |
| LINC00632  | 1.02  | 1.30E-01 | 1.00E+00 | -1.17 | 3.17E-02 | 4.90E-01 |
| AC119427.1 | 0.21  | 6.78E-01 | 1.00E+00 | -1.50 | 3.17E-02 | 4.90E-01 |
| AL365356.5 | -1.56 | 2.28E-01 | 1.00E+00 | 2.71  | 3.18E-02 | 4.91E-01 |
| SALL4      | -3.00 | 2.02E-02 | 8.85E-01 | 2.44  | 3.18E-02 | 4.91E-01 |
| MT1L       | -0.27 | 6.79E-01 | 1.00E+00 | -0.80 | 3.18E-02 | 4.91E-01 |
| TNFRSF10B  | -0.09 | 7.44E-01 | 1.00E+00 | 1.16  | 3.19E-02 | 4.92E-01 |
| SIRPA      | -0.02 | 9.26E-01 | 1.00E+00 | 1.15  | 3.19E-02 | 4.92E-01 |
| SCFD2      | -0.21 | 3.68E-01 | 1.00E+00 | -0.43 | 3.20E-02 | 4.92E-01 |
| CYP24A1    | -0.29 | 7.84E-01 | 1.00E+00 | 2.27  | 3.20E-02 | 4.92E-01 |
| SUMO4      | -3.51 | 2.65E-02 | 9.49E-01 | 1.78  | 3.20E-02 | 4.92E-01 |
| HPCA       | -3.54 | 2.47E-01 | 1.00E+00 | 2.76  | 3.21E-02 | 4.93E-01 |
| NME7       | -0.09 | 7.81E-01 | 1.00E+00 | -0.71 | 3.21E-02 | 4.93E-01 |
| AL353648.1 | 1.72  | 2.93E-01 | 1.00E+00 | -4.55 | 3.21E-02 | 4.93E-01 |
| TRIM22     | 0.21  | 7.05E-01 | 1.00E+00 | 1.14  | 3.21E-02 | 4.93E-01 |
| HACL1      | -0.09 | 7.43E-01 | 1.00E+00 | -0.64 | 3.23E-02 | 4.94E-01 |
| AIF1       | -0.31 | 4.40E-01 | 1.00E+00 | 0.76  | 3.23E-02 | 4.94E-01 |

|                    |       |          |          |       |          |          |
|--------------------|-------|----------|----------|-------|----------|----------|
| <b>AC068860.1</b>  | -0.80 | 7.03E-01 | 1.00E+00 | -2.90 | 3.23E-02 | 4.94E-01 |
| <b>LINC01644</b>   | -0.42 | 9.02E-01 | 1.00E+00 | 3.98  | 3.23E-02 | 4.94E-01 |
| <b>G8687</b>       | -2.56 | 8.27E-02 | 1.00E+00 | -2.27 | 3.24E-02 | 4.94E-01 |
| <b>GZMK</b>        | -3.06 | 7.46E-02 | 1.00E+00 | 1.95  | 3.24E-02 | 4.94E-01 |
| <b>XLOC_003809</b> | -2.01 | 2.62E-01 | 1.00E+00 | 2.92  | 3.24E-02 | 4.94E-01 |
| <b>POLR2J3</b>     | 0.34  | 5.81E-01 | 1.00E+00 | 0.79  | 3.24E-02 | 4.94E-01 |
| <b>ZNF865</b>      | -0.54 | 1.08E-01 | 1.00E+00 | 1.96  | 3.24E-02 | 4.94E-01 |
| <b>HTR2B</b>       | 0.84  | 4.67E-01 | 1.00E+00 | 1.63  | 3.24E-02 | 4.94E-01 |
| <b>ZC3H11A</b>     | -1.10 | 7.53E-01 | 1.00E+00 | 2.09  | 3.24E-02 | 4.94E-01 |
| <b>F8A1</b>        | -0.21 | 5.29E-01 | 1.00E+00 | -1.31 | 3.24E-02 | 4.94E-01 |
| <b>AC068338.3</b>  | NA    | NA       | NA       | -1.97 | 3.25E-02 | 4.94E-01 |
| <b>TGM1</b>        | 0.12  | 8.46E-01 | 1.00E+00 | 1.27  | 3.25E-02 | 4.94E-01 |
| <b>IDH1</b>        | 0.63  | 1.31E-01 | 1.00E+00 | -0.84 | 3.26E-02 | 4.94E-01 |
| <b>AC026367.1</b>  | 0.43  | 6.43E-01 | 1.00E+00 | 2.19  | 3.26E-02 | 4.94E-01 |
| <b>COLGALT1</b>    | -0.12 | 5.65E-01 | 1.00E+00 | 0.61  | 3.26E-02 | 4.94E-01 |
| <b>AC105250.1</b>  | -0.87 | 7.99E-01 | 1.00E+00 | -1.52 | 3.27E-02 | 4.94E-01 |
| <b>SNHG12</b>      | 0.25  | 7.18E-01 | 1.00E+00 | 1.14  | 3.27E-02 | 4.94E-01 |
| <b>SRC</b>         | 0.09  | 7.00E-01 | 1.00E+00 | 1.38  | 3.27E-02 | 4.94E-01 |
| <b>ATP5PDP4</b>    | -0.27 | 9.38E-01 | 1.00E+00 | -1.60 | 3.27E-02 | 4.94E-01 |
| <b>ERFE</b>        | -0.26 | 8.58E-01 | 1.00E+00 | 2.84  | 3.27E-02 | 4.94E-01 |
| <b>CCDC153</b>     | -0.27 | 5.01E-01 | 1.00E+00 | -0.80 | 3.28E-02 | 4.94E-01 |
| <b>SH3RF3</b>      | 0.10  | 7.08E-01 | 1.00E+00 | 1.39  | 3.28E-02 | 4.94E-01 |
| <b>PDK3</b>        | 0.25  | 6.65E-01 | 1.00E+00 | -0.76 | 3.28E-02 | 4.94E-01 |
| <b>FKBP15</b>      | -0.14 | 4.50E-01 | 1.00E+00 | 0.79  | 3.28E-02 | 4.94E-01 |
| <b>ITGA4</b>       | -0.67 | 5.05E-02 | 1.00E+00 | 1.18  | 3.28E-02 | 4.94E-01 |
| <b>KRT222</b>      | 0.65  | 6.83E-01 | 1.00E+00 | -2.07 | 3.28E-02 | 4.94E-01 |
| <b>CEBPZOS</b>     | 0.02  | 9.21E-01 | 1.00E+00 | -0.45 | 3.28E-02 | 4.94E-01 |
| <b>GLIS3</b>       | -0.36 | 4.61E-01 | 1.00E+00 | 1.61  | 3.28E-02 | 4.94E-01 |
| <b>LYRM1</b>       | 0.26  | 1.83E-01 | 1.00E+00 | -0.63 | 3.29E-02 | 4.94E-01 |
| <b>RUNX2</b>       | -0.21 | 5.35E-01 | 1.00E+00 | 1.21  | 3.29E-02 | 4.94E-01 |
| <b>COQ5</b>        | 0.40  | 5.57E-02 | 1.00E+00 | -0.51 | 3.29E-02 | 4.94E-01 |
| <b>IGHV3-49</b>    | 6.57  | 2.25E-07 | 8.84E-05 | 3.88  | 3.29E-02 | 4.94E-01 |



|                    |       |          |          |       |          |          |
|--------------------|-------|----------|----------|-------|----------|----------|
| <b>KRT8P36</b>     | -0.07 | 9.74E-01 | 1.00E+00 | -1.92 | 3.30E-02 | 4.95E-01 |
| <b>NRP2</b>        | 0.08  | 8.41E-01 | 1.00E+00 | 1.45  | 3.30E-02 | 4.95E-01 |
| <b>AC007619.1</b>  | 0.37  | 8.57E-01 | 1.00E+00 | 1.71  | 3.30E-02 | 4.95E-01 |
| <b>GPLD1</b>       | 0.34  | 5.23E-01 | 1.00E+00 | -0.90 | 3.30E-02 | 4.95E-01 |
| <b>KRT18P63</b>    | -3.71 | 7.70E-03 | 5.38E-01 | 2.22  | 3.31E-02 | 4.95E-01 |
| <b>PSTPIP1</b>     | -0.32 | 5.01E-01 | 1.00E+00 | 1.15  | 3.31E-02 | 4.95E-01 |
| <b>CYB5A</b>       | 0.08  | 6.81E-01 | 1.00E+00 | -0.87 | 3.31E-02 | 4.95E-01 |
| <b>COG8</b>        | -0.20 | 5.68E-01 | 1.00E+00 | -0.55 | 3.31E-02 | 4.95E-01 |
| <b>G26894</b>      | -1.69 | 4.16E-01 | 1.00E+00 | 3.88  | 3.32E-02 | 4.96E-01 |
| <b>KIAA0513</b>    | -0.24 | 4.99E-01 | 1.00E+00 | 0.89  | 3.32E-02 | 4.96E-01 |
| <b>GON7</b>        | -0.14 | 4.93E-01 | 1.00E+00 | -0.56 | 3.32E-02 | 4.96E-01 |
| <b>TNN</b>         | -0.96 | 2.71E-01 | 1.00E+00 | -1.83 | 3.33E-02 | 4.96E-01 |
| <b>IGSF22</b>      | 0.32  | 4.23E-01 | 1.00E+00 | 0.95  | 3.33E-02 | 4.96E-01 |
| <b>CSK</b>         | -0.14 | 5.29E-01 | 1.00E+00 | 1.19  | 3.33E-02 | 4.96E-01 |
| <b>GPR85</b>       | -0.17 | 8.40E-01 | 1.00E+00 | 1.63  | 3.34E-02 | 4.97E-01 |
| <b>ITGB2</b>       | -0.20 | 5.43E-01 | 1.00E+00 | 1.59  | 3.34E-02 | 4.97E-01 |
| <b>HIPK2</b>       | 0.34  | 4.99E-01 | 1.00E+00 | 0.58  | 3.35E-02 | 4.98E-01 |
| <b>MICA</b>        | 0.04  | 8.60E-01 | 1.00E+00 | 0.47  | 3.35E-02 | 4.98E-01 |
| <b>MN1</b>         | -0.40 | 2.79E-01 | 1.00E+00 | 0.95  | 3.35E-02 | 4.98E-01 |
| <b>AC011239.2</b>  | -2.17 | 1.34E-01 | 1.00E+00 | -2.18 | 3.36E-02 | 4.98E-01 |
| <b>CDKN2AIPNL</b>  | -0.01 | 9.61E-01 | 1.00E+00 | -0.61 | 3.36E-02 | 4.98E-01 |
| <b>G9105</b>       | 0.11  | 9.39E-01 | 1.00E+00 | -2.12 | 3.36E-02 | 4.98E-01 |
| <b>PPP4R1</b>      | -0.24 | 3.81E-01 | 1.00E+00 | 0.71  | 3.37E-02 | 4.98E-01 |
| <b>NPM3</b>        | -0.83 | 4.71E-04 | 9.32E-02 | 0.87  | 3.37E-02 | 4.98E-01 |
| <b>BTK</b>         | 0.03  | 9.49E-01 | 1.00E+00 | 1.25  | 3.37E-02 | 4.98E-01 |
| <b>MTCO1P12</b>    | -0.77 | 8.10E-01 | 1.00E+00 | -1.59 | 3.37E-02 | 4.98E-01 |
| <b>XLOC_004054</b> | 0.92  | 7.17E-01 | 1.00E+00 | 2.62  | 3.37E-02 | 4.98E-01 |
| <b>AC092167.1</b>  | 0.43  | 9.03E-01 | 1.00E+00 | 2.88  | 3.37E-02 | 4.98E-01 |
| <b>TMBIM4</b>      | 0.21  | 4.23E-01 | 1.00E+00 | -0.88 | 3.38E-02 | 4.98E-01 |
| <b>LINC01431</b>   | -1.24 | 2.06E-01 | 1.00E+00 | -1.32 | 3.38E-02 | 4.98E-01 |
| <b>LRRC15</b>      | -0.47 | 5.48E-01 | 1.00E+00 | 1.59  | 3.38E-02 | 4.98E-01 |
| <b>TTLL10</b>      | 0.21  | 8.06E-01 | 1.00E+00 | -2.58 | 3.38E-02 | 4.98E-01 |

|                   |       |          |          |       |          |          |
|-------------------|-------|----------|----------|-------|----------|----------|
| <b>COL16A1</b>    | 0.00  | 9.98E-01 | 1.00E+00 | 1.38  | 3.38E-02 | 4.98E-01 |
| <b>AC011247.1</b> | 0.32  | 6.90E-01 | 1.00E+00 | -1.13 | 3.39E-02 | 4.98E-01 |
| <b>SLC34A1</b>    | -2.41 | 5.03E-02 | 1.00E+00 | 2.14  | 3.39E-02 | 4.99E-01 |
| <b>AC008556.1</b> | -0.07 | 8.83E-01 | 1.00E+00 | -1.35 | 3.39E-02 | 4.99E-01 |
| <b>CD2</b>        | -0.92 | 1.41E-01 | 1.00E+00 | 1.61  | 3.40E-02 | 5.00E-01 |
| <b>CD84</b>       | 0.41  | 4.77E-01 | 1.00E+00 | 1.25  | 3.41E-02 | 5.00E-01 |
| <b>AL357079.2</b> | -0.35 | 8.51E-01 | 1.00E+00 | -2.16 | 3.41E-02 | 5.00E-01 |
| <b>HOXB13</b>     | 1.84  | 4.69E-01 | 1.00E+00 | 3.37  | 3.41E-02 | 5.00E-01 |
| <b>GLRX5</b>      | -0.01 | 9.68E-01 | 1.00E+00 | -1.35 | 3.42E-02 | 5.00E-01 |
| <b>AGFG2</b>      | 0.15  | 4.51E-01 | 1.00E+00 | -0.60 | 3.42E-02 | 5.00E-01 |
| <b>AC092953.1</b> | 1.99  | 3.92E-01 | 1.00E+00 | 2.12  | 3.42E-02 | 5.00E-01 |
| <b>LINC01506</b>  | -0.03 | 9.92E-01 | 1.00E+00 | 1.95  | 3.43E-02 | 5.01E-01 |
| <b>TNK2</b>       | -0.22 | 2.83E-01 | 1.00E+00 | 1.46  | 3.43E-02 | 5.01E-01 |
| <b>PPIF</b>       | 0.02  | 9.55E-01 | 1.00E+00 | 0.71  | 3.43E-02 | 5.01E-01 |
| <b>CDH18</b>      | -0.19 | 8.42E-01 | 1.00E+00 | -3.18 | 3.43E-02 | 5.01E-01 |
| <b>DDA1</b>       | -0.05 | 8.50E-01 | 1.00E+00 | 0.29  | 3.43E-02 | 5.01E-01 |
| <b>ARSJ</b>       | -0.09 | 8.37E-01 | 1.00E+00 | 0.97  | 3.43E-02 | 5.01E-01 |
| <b>CHRAC1</b>     | -0.15 | 3.92E-01 | 1.00E+00 | -0.41 | 3.44E-02 | 5.01E-01 |
| <b>PHOSPHO2</b>   | 0.11  | 8.49E-01 | 1.00E+00 | -1.31 | 3.44E-02 | 5.01E-01 |
| <b>LHFPL3-AS1</b> | 0.95  | 4.85E-01 | 1.00E+00 | 2.27  | 3.44E-02 | 5.01E-01 |
| <b>ARHGAP30</b>   | 0.02  | 9.54E-01 | 1.00E+00 | 1.54  | 3.44E-02 | 5.01E-01 |
| <b>DDX41</b>      | -0.35 | 7.71E-02 | 1.00E+00 | 0.44  | 3.45E-02 | 5.01E-01 |
| <b>ORAI1</b>      | -0.21 | 5.44E-01 | 1.00E+00 | -1.05 | 3.45E-02 | 5.01E-01 |
| <b>AC137723.1</b> | 0.04  | 9.86E-01 | 1.00E+00 | -1.81 | 3.45E-02 | 5.01E-01 |
| <b>AC084036.1</b> | -0.33 | 7.14E-01 | 1.00E+00 | -1.37 | 3.45E-02 | 5.01E-01 |
| <b>SRGN</b>       | 0.51  | 3.27E-01 | 1.00E+00 | 1.04  | 3.46E-02 | 5.01E-01 |
| <b>SERPINB9</b>   | 0.87  | 7.18E-02 | 1.00E+00 | 1.19  | 3.46E-02 | 5.02E-01 |
| <b>ADPGK</b>      | -0.06 | 7.61E-01 | 1.00E+00 | 0.46  | 3.46E-02 | 5.02E-01 |
| <b>CHRNA7</b>     | 1.41  | 8.75E-02 | 1.00E+00 | 1.21  | 3.46E-02 | 5.02E-01 |
| <b>BCL2L1</b>     | 0.19  | 3.59E-01 | 1.00E+00 | 0.64  | 3.47E-02 | 5.02E-01 |
| <b>FGFR3</b>      | -0.15 | 6.99E-01 | 1.00E+00 | -1.73 | 3.47E-02 | 5.02E-01 |
| <b>ITGA11</b>     | 0.29  | 6.51E-01 | 1.00E+00 | 1.11  | 3.47E-02 | 5.02E-01 |

|                   |       |          |          |       |          |          |
|-------------------|-------|----------|----------|-------|----------|----------|
| <b>FBXO9</b>      | 0.18  | 4.28E-01 | 1.00E+00 | -0.55 | 3.48E-02 | 5.03E-01 |
| <b>ACADM</b>      | 0.47  | 1.73E-01 | 1.00E+00 | -0.68 | 3.48E-02 | 5.03E-01 |
| <b>TRBV7-8</b>    | 0.22  | 8.83E-01 | 1.00E+00 | 2.49  | 3.49E-02 | 5.03E-01 |
| <b>MMP2-AS1</b>   | 0.40  | 8.51E-01 | 1.00E+00 | 2.29  | 3.49E-02 | 5.03E-01 |
| <b>NPAS1</b>      | -0.28 | 6.31E-01 | 1.00E+00 | -1.68 | 3.49E-02 | 5.03E-01 |
| <b>CDC25B</b>     | 0.03  | 9.17E-01 | 1.00E+00 | 1.18  | 3.49E-02 | 5.03E-01 |
| <b>CD83</b>       | 0.01  | 9.82E-01 | 1.00E+00 | 0.67  | 3.49E-02 | 5.03E-01 |
| <b>RUBCN</b>      | -0.06 | 8.06E-01 | 1.00E+00 | 0.52  | 3.50E-02 | 5.03E-01 |
| <b>CXorf21</b>    | 0.51  | 4.35E-01 | 1.00E+00 | 1.70  | 3.50E-02 | 5.03E-01 |
| <b>PNPLA5</b>     | 1.87  | 2.94E-01 | 1.00E+00 | -2.34 | 3.50E-02 | 5.03E-01 |
| <b>LUZP1</b>      | -0.24 | 2.40E-01 | 1.00E+00 | 0.41  | 3.50E-02 | 5.03E-01 |
| <b>MPEG1</b>      | -0.29 | 5.64E-01 | 1.00E+00 | 1.35  | 3.50E-02 | 5.03E-01 |
| <b>AC002091.2</b> | -1.31 | 6.67E-01 | 1.00E+00 | 2.81  | 3.51E-02 | 5.03E-01 |
| <b>AC083799.1</b> | -0.32 | 3.42E-01 | 1.00E+00 | 0.66  | 3.51E-02 | 5.03E-01 |
| <b>CBX5</b>       | 0.39  | 2.80E-01 | 1.00E+00 | -0.42 | 3.51E-02 | 5.03E-01 |
| <b>AL353708.3</b> | -1.47 | 6.70E-01 | 1.00E+00 | -2.92 | 3.52E-02 | 5.03E-01 |
| <b>SNX29P2</b>    | 0.37  | 6.80E-01 | 1.00E+00 | 1.73  | 3.52E-02 | 5.03E-01 |
| <b>NEK7</b>       | 0.92  | 3.83E-02 | 1.00E+00 | -1.03 | 3.52E-02 | 5.03E-01 |
| <b>MED28P3</b>    | -0.76 | 4.35E-01 | 1.00E+00 | -1.64 | 3.52E-02 | 5.03E-01 |
| <b>SLC25A1</b>    | 0.17  | 6.05E-01 | 1.00E+00 | -1.02 | 3.53E-02 | 5.03E-01 |
| <b>CGGBP1</b>     | 0.18  | 3.90E-01 | 1.00E+00 | -0.37 | 3.53E-02 | 5.03E-01 |
| <b>AP000911.2</b> | -1.09 | 7.12E-01 | 1.00E+00 | -3.39 | 3.53E-02 | 5.03E-01 |
| <b>RPL30P11</b>   | -3.52 | 2.96E-01 | 1.00E+00 | -3.40 | 3.54E-02 | 5.03E-01 |
| <b>RGS19</b>      | 0.02  | 9.50E-01 | 1.00E+00 | 0.85  | 3.54E-02 | 5.03E-01 |
| <b>SNHG6</b>      | -0.27 | 4.46E-01 | 1.00E+00 | -0.85 | 3.54E-02 | 5.03E-01 |
| <b>IL33</b>       | -0.33 | 4.59E-01 | 1.00E+00 | -0.73 | 3.54E-02 | 5.03E-01 |
| <b>YIPF6</b>      | 0.36  | 2.59E-02 | 9.40E-01 | -0.56 | 3.54E-02 | 5.03E-01 |
| <b>OPN3</b>       | 0.85  | 5.41E-02 | 1.00E+00 | -1.45 | 3.54E-02 | 5.03E-01 |
| <b>RBMS1P1</b>    | -1.38 | 4.41E-01 | 1.00E+00 | -1.02 | 3.55E-02 | 5.03E-01 |
| <b>ADAMTS2</b>    | 0.16  | 8.17E-01 | 1.00E+00 | 1.78  | 3.55E-02 | 5.03E-01 |
| <b>CCDC51</b>     | 0.02  | 9.18E-01 | 1.00E+00 | 0.43  | 3.55E-02 | 5.03E-01 |
| <b>SALL1</b>      | -2.49 | 1.23E-02 | 6.93E-01 | 2.99  | 3.55E-02 | 5.03E-01 |

|                    |       |          |          |       |          |          |
|--------------------|-------|----------|----------|-------|----------|----------|
| <b>AL731569.1</b>  | -0.11 | 8.24E-01 | 1.00E+00 | -1.86 | 3.55E-02 | 5.03E-01 |
| <b>SP100</b>       | 0.09  | 8.20E-01 | 1.00E+00 | 0.52  | 3.55E-02 | 5.03E-01 |
| <b>AL669831.5</b>  | 0.03  | 9.75E-01 | 1.00E+00 | 1.07  | 3.55E-02 | 5.03E-01 |
| <b>AC080023.2</b>  | 2.05  | 3.23E-01 | 1.00E+00 | -1.23 | 3.56E-02 | 5.04E-01 |
| <b>SUCLA2</b>      | 0.26  | 2.87E-01 | 1.00E+00 | -0.63 | 3.57E-02 | 5.06E-01 |
| <b>ADCY2</b>       | -0.31 | 2.99E-01 | 1.00E+00 | -1.02 | 3.58E-02 | 5.06E-01 |
| <b>TIGD7</b>       | 0.20  | 7.86E-01 | 1.00E+00 | -1.11 | 3.58E-02 | 5.06E-01 |
| <b>AL022069.1</b>  | -2.51 | 1.01E-01 | 1.00E+00 | -2.93 | 3.59E-02 | 5.06E-01 |
| <b>AC011503.1</b>  | 2.64  | 1.08E-01 | 1.00E+00 | -3.11 | 3.59E-02 | 5.07E-01 |
| <b>CLECL1</b>      | 0.00  | 9.98E-01 | 1.00E+00 | 1.57  | 3.59E-02 | 5.07E-01 |
| <b>TMEM26</b>      | -2.55 | 4.56E-02 | 1.00E+00 | 2.73  | 3.59E-02 | 5.07E-01 |
| <b>NOV</b>         | -0.19 | 5.57E-01 | 1.00E+00 | 0.82  | 3.60E-02 | 5.07E-01 |
| <b>SMURF2P1</b>    | -0.34 | 3.19E-01 | 1.00E+00 | 1.48  | 3.60E-02 | 5.07E-01 |
| <b>HSH2D</b>       | 0.17  | 8.37E-01 | 1.00E+00 | 2.33  | 3.61E-02 | 5.08E-01 |
| <b>ZNF687</b>      | -0.26 | 1.57E-01 | 1.00E+00 | 1.41  | 3.61E-02 | 5.08E-01 |
| <b>ANKRD20A4</b>   | -4.32 | 5.78E-03 | 4.52E-01 | -1.76 | 3.62E-02 | 5.08E-01 |
| <b>RPS4XP2</b>     | NA    | NA       | NA       | 1.54  | 3.62E-02 | 5.08E-01 |
| <b>SLC30A8</b>     | -3.17 | 2.14E-01 | 1.00E+00 | -4.51 | 3.62E-02 | 5.08E-01 |
| <b>AL354928.1</b>  | -2.22 | 1.36E-01 | 1.00E+00 | 2.53  | 3.62E-02 | 5.08E-01 |
| <b>TLR8</b>        | -0.32 | 6.51E-01 | 1.00E+00 | 2.14  | 3.62E-02 | 5.08E-01 |
| <b>IGDCC4</b>      | 0.27  | 6.68E-01 | 1.00E+00 | 1.30  | 3.63E-02 | 5.08E-01 |
| <b>ARMCX7P</b>     | 1.70  | 3.76E-01 | 1.00E+00 | -1.11 | 3.63E-02 | 5.08E-01 |
| <b>GPX7</b>        | 0.26  | 5.30E-01 | 1.00E+00 | 0.60  | 3.63E-02 | 5.08E-01 |
| <b>YIF1B</b>       | -0.39 | 6.19E-02 | 1.00E+00 | 0.41  | 3.63E-02 | 5.08E-01 |
| <b>XLOC_001953</b> | 0.65  | 3.73E-01 | 1.00E+00 | 1.39  | 3.63E-02 | 5.08E-01 |
| <b>ZNF208</b>      | 0.28  | 7.36E-01 | 1.00E+00 | -2.05 | 3.63E-02 | 5.08E-01 |
| <b>SSC5D</b>       | 0.01  | 9.81E-01 | 1.00E+00 | 1.59  | 3.64E-02 | 5.08E-01 |
| <b>LINC02211</b>   | 4.85  | 4.83E-03 | 4.03E-01 | 2.59  | 3.64E-02 | 5.08E-01 |
| <b>AP000439.2</b>  | 0.64  | 1.50E-01 | 1.00E+00 | -2.07 | 3.64E-02 | 5.08E-01 |
| <b>HIST1H2BE</b>   | -1.85 | 1.88E-01 | 1.00E+00 | -2.19 | 3.64E-02 | 5.08E-01 |
| <b>PIEZO2</b>      | 0.84  | 1.04E-01 | 1.00E+00 | 1.31  | 3.65E-02 | 5.08E-01 |
| <b>AC034243.1</b>  | -1.10 | 6.86E-01 | 1.00E+00 | -2.13 | 3.65E-02 | 5.08E-01 |

|             |       |          |          |       |          |          |
|-------------|-------|----------|----------|-------|----------|----------|
| PIK3R5      | -0.34 | 4.08E-01 | 1.00E+00 | 1.75  | 3.65E-02 | 5.08E-01 |
| WFDC12      | -0.88 | 1.83E-01 | 1.00E+00 | 1.66  | 3.66E-02 | 5.09E-01 |
| DZIP1       | 0.08  | 8.73E-01 | 1.00E+00 | 1.00  | 3.66E-02 | 5.09E-01 |
| BSN         | -1.67 | 1.61E-02 | 7.94E-01 | 2.42  | 3.67E-02 | 5.10E-01 |
| COL2A1      | -1.96 | 2.13E-02 | 8.94E-01 | -2.76 | 3.67E-02 | 5.10E-01 |
| AC007546.1  | 3.41  | 2.95E-01 | 1.00E+00 | -2.91 | 3.67E-02 | 5.10E-01 |
| STAG2       | 0.20  | 3.50E-01 | 1.00E+00 | 0.30  | 3.67E-02 | 5.10E-01 |
| PNPLA6      | -0.16 | 3.89E-01 | 1.00E+00 | 1.18  | 3.68E-02 | 5.10E-01 |
| FLVCR2      | -0.02 | 9.71E-01 | 1.00E+00 | 1.00  | 3.68E-02 | 5.10E-01 |
| AC068620.1  | -0.20 | 8.41E-01 | 1.00E+00 | -1.36 | 3.68E-02 | 5.10E-01 |
| XIST        | -0.88 | 1.36E-01 | 1.00E+00 | 1.24  | 3.68E-02 | 5.10E-01 |
| CORO1A      | -0.36 | 3.12E-01 | 1.00E+00 | 1.29  | 3.68E-02 | 5.10E-01 |
| CNTNAP2     | -2.43 | 1.11E-02 | 6.52E-01 | 1.81  | 3.69E-02 | 5.10E-01 |
| XLOC_014097 | -1.54 | 5.99E-01 | 1.00E+00 | 2.72  | 3.69E-02 | 5.10E-01 |
| LINC01443   | -0.13 | 9.24E-01 | 1.00E+00 | 2.01  | 3.69E-02 | 5.10E-01 |
| SLC20A2     | -0.11 | 6.47E-01 | 1.00E+00 | 0.52  | 3.69E-02 | 5.10E-01 |
| PPP4R1-AS1  | -1.76 | 5.63E-01 | 1.00E+00 | -2.05 | 3.70E-02 | 5.10E-01 |
| ITPA        | -0.17 | 4.35E-01 | 1.00E+00 | 0.37  | 3.70E-02 | 5.10E-01 |
| RIMS1       | -0.54 | 5.90E-01 | 1.00E+00 | -1.48 | 3.70E-02 | 5.10E-01 |
| XLOC_009498 | 1.92  | 1.01E-01 | 1.00E+00 | -1.76 | 3.71E-02 | 5.10E-01 |
| KLRB1       | -0.64 | 4.50E-01 | 1.00E+00 | 1.49  | 3.71E-02 | 5.10E-01 |
| AC116407.1  | -0.29 | 7.52E-01 | 1.00E+00 | -2.25 | 3.71E-02 | 5.10E-01 |
| ARPP19      | 0.38  | 1.06E-01 | 1.00E+00 | -0.41 | 3.71E-02 | 5.10E-01 |
| AC004812.2  | -0.39 | 3.09E-01 | 1.00E+00 | -1.12 | 3.72E-02 | 5.10E-01 |
| PLIN3       | -0.32 | 3.12E-01 | 1.00E+00 | 0.45  | 3.72E-02 | 5.10E-01 |
| SLC44A1     | 0.15  | 4.67E-01 | 1.00E+00 | -0.52 | 3.72E-02 | 5.10E-01 |
| HIC1        | 0.50  | 3.15E-01 | 1.00E+00 | 1.48  | 3.72E-02 | 5.10E-01 |
| TOR2A       | -0.18 | 4.90E-01 | 1.00E+00 | 0.54  | 3.72E-02 | 5.10E-01 |
| PNOC        | -1.22 | 7.08E-01 | 1.00E+00 | 3.27  | 3.72E-02 | 5.10E-01 |
| AP001021.2  | -0.20 | 9.01E-01 | 1.00E+00 | -1.95 | 3.72E-02 | 5.10E-01 |
| AC093912.1  | -2.92 | 3.90E-01 | 1.00E+00 | -4.05 | 3.73E-02 | 5.10E-01 |
| XLOC_006617 | -0.93 | 7.87E-01 | 1.00E+00 | 5.16  | 3.73E-02 | 5.11E-01 |

|                    |       |          |          |       |          |          |
|--------------------|-------|----------|----------|-------|----------|----------|
| <b>AC017104.3</b>  | 1.92  | 1.17E-01 | 1.00E+00 | 2.02  | 3.74E-02 | 5.11E-01 |
| <b>RUBCNL</b>      | 0.61  | 3.43E-01 | 1.00E+00 | 1.10  | 3.74E-02 | 5.11E-01 |
| <b>AC007318.2</b>  | -3.34 | 9.79E-02 | 1.00E+00 | 1.73  | 3.74E-02 | 5.11E-01 |
| <b>DPEP2</b>       | 0.33  | 5.84E-01 | 1.00E+00 | 1.19  | 3.75E-02 | 5.11E-01 |
| <b>AC099552.3</b>  | 1.23  | 4.56E-01 | 1.00E+00 | -2.89 | 3.75E-02 | 5.11E-01 |
| <b>LTBP2</b>       | 0.36  | 4.58E-01 | 1.00E+00 | 1.20  | 3.75E-02 | 5.12E-01 |
| <b>AL035530.2</b>  | 0.00  | 9.98E-01 | 1.00E+00 | -0.77 | 3.76E-02 | 5.12E-01 |
| <b>MRPL19</b>      | -0.10 | 6.13E-01 | 1.00E+00 | -0.47 | 3.76E-02 | 5.12E-01 |
| <b>ARL15</b>       | -0.06 | 8.25E-01 | 1.00E+00 | -0.82 | 3.77E-02 | 5.12E-01 |
| <b>FCER1G</b>      | 0.20  | 6.29E-01 | 1.00E+00 | 0.91  | 3.77E-02 | 5.12E-01 |
| <b>KIAA0391</b>    | 0.28  | 2.91E-01 | 1.00E+00 | 0.72  | 3.77E-02 | 5.12E-01 |
| <b>PIP5KL1</b>     | -0.04 | 9.11E-01 | 1.00E+00 | 0.79  | 3.77E-02 | 5.12E-01 |
| <b>LINC01269</b>   | 2.53  | 2.88E-01 | 1.00E+00 | 2.24  | 3.77E-02 | 5.12E-01 |
| <b>ATP5MC3</b>     | 0.15  | 5.38E-01 | 1.00E+00 | -0.42 | 3.77E-02 | 5.12E-01 |
| <b>HNRNPDL</b>     | 0.13  | 5.54E-01 | 1.00E+00 | 0.35  | 3.78E-02 | 5.12E-01 |
| <b>DBNL</b>        | -0.12 | 5.87E-01 | 1.00E+00 | 0.38  | 3.78E-02 | 5.12E-01 |
| <b>KLF12</b>       | -0.08 | 8.28E-01 | 1.00E+00 | 0.58  | 3.78E-02 | 5.12E-01 |
| <b>DRAM2</b>       | 0.17  | 5.07E-01 | 1.00E+00 | -0.71 | 3.79E-02 | 5.12E-01 |
| <b>C9orf116</b>    | -0.02 | 9.76E-01 | 1.00E+00 | 0.75  | 3.79E-02 | 5.12E-01 |
| <b>NACA4P</b>      | -0.13 | 9.52E-01 | 1.00E+00 | -1.47 | 3.79E-02 | 5.12E-01 |
| <b>G29073</b>      | -4.34 | 1.23E-01 | 1.00E+00 | 2.59  | 3.80E-02 | 5.12E-01 |
| <b>ACTR3C</b>      | 0.10  | 8.43E-01 | 1.00E+00 | -0.95 | 3.80E-02 | 5.12E-01 |
| <b>AC006449.5</b>  | -0.24 | 8.28E-01 | 1.00E+00 | -2.02 | 3.80E-02 | 5.12E-01 |
| <b>IGFBP2</b>      | -0.13 | 7.42E-01 | 1.00E+00 | 1.54  | 3.80E-02 | 5.12E-01 |
| <b>AC009542.1</b>  | 0.59  | 8.65E-01 | 1.00E+00 | 2.90  | 3.80E-02 | 5.12E-01 |
| <b>XLOC_012551</b> | -1.27 | 7.09E-01 | 1.00E+00 | -2.92 | 3.80E-02 | 5.12E-01 |
| <b>OTOGL</b>       | -1.17 | 2.58E-01 | 1.00E+00 | -2.06 | 3.80E-02 | 5.12E-01 |
| <b>TMEM260</b>     | -0.08 | 7.85E-01 | 1.00E+00 | -0.57 | 3.80E-02 | 5.12E-01 |
| <b>PTER</b>        | -0.27 | 2.74E-01 | 1.00E+00 | -0.54 | 3.81E-02 | 5.12E-01 |
| <b>BX293535.1</b>  | -3.36 | 1.62E-01 | 1.00E+00 | -2.18 | 3.81E-02 | 5.12E-01 |
| <b>SELL</b>        | 0.14  | 7.95E-01 | 1.00E+00 | 1.69  | 3.81E-02 | 5.12E-01 |
| <b>ANO1</b>        | -0.21 | 3.94E-01 | 1.00E+00 | -0.58 | 3.82E-02 | 5.12E-01 |

|             |       |          |          |       |          |          |
|-------------|-------|----------|----------|-------|----------|----------|
| FER1L5      | 1.03  | 5.52E-01 | 1.00E+00 | -3.02 | 3.82E-02 | 5.12E-01 |
| NUDT16      | 0.01  | 9.62E-01 | 1.00E+00 | 0.68  | 3.82E-02 | 5.12E-01 |
| TUBB2A      | -0.23 | 5.65E-01 | 1.00E+00 | 0.64  | 3.83E-02 | 5.12E-01 |
| SEC14L1P1   | -1.02 | 2.57E-01 | 1.00E+00 | 1.46  | 3.83E-02 | 5.12E-01 |
| CD3D        | -0.38 | 5.98E-01 | 1.00E+00 | 1.30  | 3.83E-02 | 5.12E-01 |
| CCDC78      | -1.24 | 4.39E-01 | 1.00E+00 | 2.67  | 3.83E-02 | 5.12E-01 |
| FRMD6-AS1   | 0.02  | 9.68E-01 | 1.00E+00 | 0.92  | 3.83E-02 | 5.12E-01 |
| FAM45BP     | 0.07  | 9.27E-01 | 1.00E+00 | -0.83 | 3.83E-02 | 5.12E-01 |
| XLOC_000567 | -0.35 | 7.03E-01 | 1.00E+00 | -1.55 | 3.84E-02 | 5.12E-01 |
| CSF3R       | -0.41 | 4.24E-01 | 1.00E+00 | 2.04  | 3.84E-02 | 5.12E-01 |
| ANKRD2      | 0.23  | 7.44E-01 | 1.00E+00 | 1.30  | 3.84E-02 | 5.12E-01 |
| SDK2        | -1.15 | 1.65E-02 | 8.08E-01 | 1.29  | 3.84E-02 | 5.12E-01 |
| MAFTRR      | 0.14  | 8.53E-01 | 1.00E+00 | -1.35 | 3.85E-02 | 5.12E-01 |
| TRPT1       | 0.06  | 7.87E-01 | 1.00E+00 | -0.46 | 3.85E-02 | 5.12E-01 |
| GIMAP2      | 0.24  | 5.90E-01 | 1.00E+00 | 1.01  | 3.85E-02 | 5.12E-01 |
| BMI1        | 0.20  | 5.22E-01 | 1.00E+00 | -0.63 | 3.85E-02 | 5.12E-01 |
| PCSK4       | 0.02  | 9.83E-01 | 1.00E+00 | 1.81  | 3.85E-02 | 5.12E-01 |
| RHOQP1      | 1.73  | 2.09E-01 | 1.00E+00 | -2.12 | 3.86E-02 | 5.12E-01 |
| YJU2        | -0.33 | 2.12E-01 | 1.00E+00 | 0.40  | 3.86E-02 | 5.12E-01 |
| TMEM17      | 0.66  | 4.84E-02 | 1.00E+00 | -0.64 | 3.86E-02 | 5.12E-01 |
| RAB5C       | 0.06  | 7.79E-01 | 1.00E+00 | 0.54  | 3.86E-02 | 5.12E-01 |
| DOK3        | -0.04 | 9.43E-01 | 1.00E+00 | 1.80  | 3.86E-02 | 5.12E-01 |
| FNBP1L      | 0.03  | 9.36E-01 | 1.00E+00 | -0.56 | 3.86E-02 | 5.12E-01 |
| GPS2        | -3.40 | 3.55E-02 | 1.00E+00 | -0.94 | 3.86E-02 | 5.12E-01 |
| C8orf34     | 0.30  | 6.44E-01 | 1.00E+00 | -1.55 | 3.86E-02 | 5.12E-01 |
| KYNU        | -0.70 | 9.42E-02 | 1.00E+00 | 1.26  | 3.87E-02 | 5.13E-01 |
| TMEM14B     | 0.29  | 2.25E-01 | 1.00E+00 | -0.82 | 3.87E-02 | 5.13E-01 |
| HCLS1       | 0.07  | 8.40E-01 | 1.00E+00 | 1.26  | 3.87E-02 | 5.13E-01 |
| MRPL28      | -0.26 | 2.14E-01 | 1.00E+00 | 0.36  | 3.88E-02 | 5.13E-01 |
| ZNFX1       | -0.03 | 9.43E-01 | 1.00E+00 | 0.92  | 3.88E-02 | 5.13E-01 |
| CLDND2      | -3.08 | 1.15E-01 | 1.00E+00 | -1.41 | 3.88E-02 | 5.13E-01 |
| BCAR3       | -0.01 | 9.72E-01 | 1.00E+00 | -0.83 | 3.89E-02 | 5.13E-01 |

|                   |       |          |          |       |          |          |
|-------------------|-------|----------|----------|-------|----------|----------|
| <b>CRYBB2P1</b>   | -0.11 | 8.46E-01 | 1.00E+00 | 0.67  | 3.89E-02 | 5.13E-01 |
| <b>SLC7A2</b>     | 0.37  | 2.18E-01 | 1.00E+00 | 0.86  | 3.89E-02 | 5.13E-01 |
| <b>IGKV2D-40</b>  | NA    | NA       | NA       | 3.97  | 3.89E-02 | 5.13E-01 |
| <b>OSBPL8</b>     | 0.15  | 6.20E-01 | 1.00E+00 | -0.38 | 3.89E-02 | 5.13E-01 |
| <b>PRNCR1</b>     | 2.11  | 5.33E-01 | 1.00E+00 | -1.63 | 3.89E-02 | 5.13E-01 |
| <b>AP000347.1</b> | 0.29  | 8.10E-01 | 1.00E+00 | 1.93  | 3.89E-02 | 5.13E-01 |
| <b>SLC16A7</b>    | 0.17  | 5.82E-01 | 1.00E+00 | -0.59 | 3.90E-02 | 5.13E-01 |
| <b>DDHD2</b>      | 0.30  | 4.45E-01 | 1.00E+00 | -0.63 | 3.90E-02 | 5.13E-01 |
| <b>ANAPC13</b>    | 0.22  | 2.38E-01 | 1.00E+00 | -0.77 | 3.91E-02 | 5.14E-01 |
| <b>TMSB10</b>     | 0.00  | 1.00E+00 | 1.00E+00 | 0.66  | 3.91E-02 | 5.14E-01 |
| <b>LINC01871</b>  | 0.44  | 7.66E-01 | 1.00E+00 | 1.19  | 3.91E-02 | 5.14E-01 |
| <b>ALKAL1</b>     | 1.62  | 3.33E-01 | 1.00E+00 | -3.23 | 3.92E-02 | 5.15E-01 |
| <b>Z94721.3</b>   | -2.71 | 3.15E-02 | 1.00E+00 | 2.27  | 3.93E-02 | 5.15E-01 |
| <b>PRKRIP1</b>    | 0.16  | 4.57E-01 | 1.00E+00 | 0.41  | 3.94E-02 | 5.16E-01 |
| <b>PTN</b>        | 0.08  | 8.66E-01 | 1.00E+00 | 0.94  | 3.94E-02 | 5.16E-01 |
| <b>AP002026.1</b> | 0.11  | 9.15E-01 | 1.00E+00 | -1.32 | 3.94E-02 | 5.16E-01 |
| <b>P2RX6P</b>     | 0.85  | 3.76E-01 | 1.00E+00 | -1.94 | 3.95E-02 | 5.17E-01 |
| <b>DNAJC25</b>    | -0.14 | 6.97E-01 | 1.00E+00 | -0.97 | 3.95E-02 | 5.17E-01 |
| <b>MMP19</b>      | 0.20  | 6.15E-01 | 1.00E+00 | 1.35  | 3.95E-02 | 5.17E-01 |
| <b>TYSND1</b>     | -0.09 | 6.76E-01 | 1.00E+00 | -0.48 | 3.96E-02 | 5.17E-01 |
| <b>CANT1</b>      | 0.00  | 9.81E-01 | 1.00E+00 | 0.75  | 3.97E-02 | 5.18E-01 |
| <b>SLCO2A1</b>    | 0.09  | 6.84E-01 | 1.00E+00 | 1.24  | 3.97E-02 | 5.19E-01 |
| <b>PRAG1</b>      | -0.49 | 5.50E-02 | 1.00E+00 | 1.49  | 3.98E-02 | 5.19E-01 |
| <b>ANKRD45</b>    | -0.74 | 7.21E-01 | 1.00E+00 | 2.38  | 3.98E-02 | 5.19E-01 |
| <b>GBAP1</b>      | 0.48  | 1.96E-01 | 1.00E+00 | 0.96  | 3.98E-02 | 5.19E-01 |
| <b>SPON2</b>      | -0.25 | 5.15E-01 | 1.00E+00 | 0.59  | 3.99E-02 | 5.19E-01 |
| <b>SLC22A3</b>    | 0.47  | 1.28E-01 | 1.00E+00 | -0.75 | 3.99E-02 | 5.19E-01 |
| <b>MTIF2</b>      | -0.09 | 6.55E-01 | 1.00E+00 | -0.26 | 3.99E-02 | 5.19E-01 |
| <b>ZSCAN26</b>    | 0.11  | 8.17E-01 | 1.00E+00 | -0.79 | 4.00E-02 | 5.19E-01 |
| <b>SPINK7</b>     | -2.17 | 6.86E-02 | 1.00E+00 | 1.90  | 4.00E-02 | 5.19E-01 |
| <b>HRH2</b>       | -0.88 | 3.46E-02 | 1.00E+00 | 1.57  | 4.00E-02 | 5.19E-01 |
| <b>RETREG3</b>    | 0.28  | 1.35E-01 | 1.00E+00 | -0.46 | 4.00E-02 | 5.19E-01 |



|             |       |          |          |       |          |          |
|-------------|-------|----------|----------|-------|----------|----------|
| PGM1        | 0.25  | 4.27E-01 | 1.00E+00 | -0.69 | 4.00E-02 | 5.19E-01 |
| AL161431.1  | -1.04 | 4.00E-01 | 1.00E+00 | 1.90  | 4.00E-02 | 5.19E-01 |
| SMTNL1      | -2.03 | 7.10E-02 | 1.00E+00 | 2.18  | 4.01E-02 | 5.19E-01 |
| SLC3A2      | -0.25 | 2.67E-01 | 1.00E+00 | 0.29  | 4.01E-02 | 5.19E-01 |
| DYNC2H1     | 0.03  | 9.31E-01 | 1.00E+00 | -0.42 | 4.01E-02 | 5.19E-01 |
| HIST1H2AJ   | -2.52 | 2.11E-01 | 1.00E+00 | -2.30 | 4.02E-02 | 5.19E-01 |
| XLOC_007038 | 1.68  | 4.35E-01 | 1.00E+00 | -2.39 | 4.02E-02 | 5.19E-01 |
| P2RX5       | -1.00 | 6.80E-01 | 1.00E+00 | 3.84  | 4.02E-02 | 5.19E-01 |
| AC010245.2  | 0.91  | 1.30E-01 | 1.00E+00 | -1.74 | 4.02E-02 | 5.19E-01 |
| ZCCHC4      | 0.20  | 5.51E-01 | 1.00E+00 | -0.64 | 4.02E-02 | 5.19E-01 |
| ERGIC3      | -0.14 | 5.21E-01 | 1.00E+00 | 0.29  | 4.02E-02 | 5.19E-01 |
| THUMPD2     | 0.25  | 2.97E-01 | 1.00E+00 | -0.49 | 4.03E-02 | 5.19E-01 |
| PARP9       | -0.10 | 8.71E-01 | 1.00E+00 | 0.99  | 4.03E-02 | 5.19E-01 |
| PTGFRN      | -0.11 | 5.64E-01 | 1.00E+00 | 0.84  | 4.04E-02 | 5.20E-01 |
| APOBEC3G    | -0.09 | 8.43E-01 | 1.00E+00 | 1.42  | 4.04E-02 | 5.20E-01 |
| PPP1R18     | -0.30 | 1.94E-01 | 1.00E+00 | 1.26  | 4.04E-02 | 5.20E-01 |
| PITX1       | -1.74 | 1.23E-03 | 1.86E-01 | 2.29  | 4.04E-02 | 5.20E-01 |
| LINC02067   | 1.03  | 2.96E-01 | 1.00E+00 | -2.62 | 4.05E-02 | 5.20E-01 |
| TMEM198B    | 0.34  | 2.00E-01 | 1.00E+00 | 0.65  | 4.06E-02 | 5.22E-01 |
| AP000864.1  | -0.80 | 8.18E-01 | 1.00E+00 | 3.45  | 4.07E-02 | 5.22E-01 |
| UQCRQ       | -0.02 | 9.13E-01 | 1.00E+00 | -1.09 | 4.07E-02 | 5.22E-01 |
| SLFN12      | 0.12  | 7.90E-01 | 1.00E+00 | 0.83  | 4.07E-02 | 5.22E-01 |
| BCHE        | -0.56 | 1.35E-01 | 1.00E+00 | -0.98 | 4.08E-02 | 5.22E-01 |
| AC115284.2  | -0.25 | 7.59E-01 | 1.00E+00 | -1.93 | 4.08E-02 | 5.22E-01 |
| CDR2L       | 0.09  | 8.49E-01 | 1.00E+00 | 0.93  | 4.08E-02 | 5.22E-01 |
| MIR3945HG   | NA    | NA       | NA       | 2.54  | 4.08E-02 | 5.22E-01 |
| IL16        | 0.91  | 2.73E-02 | 9.66E-01 | 0.73  | 4.08E-02 | 5.22E-01 |
| XLOC_013547 | 1.53  | 5.58E-01 | 1.00E+00 | 3.40  | 4.08E-02 | 5.22E-01 |
| HLF         | -0.39 | 1.71E-01 | 1.00E+00 | -0.86 | 4.09E-02 | 5.22E-01 |
| AKR1C2      | 0.74  | 3.20E-01 | 1.00E+00 | -1.22 | 4.09E-02 | 5.22E-01 |
| RFX5        | 0.13  | 6.27E-01 | 1.00E+00 | 0.60  | 4.09E-02 | 5.22E-01 |
| AC073508.3  | -0.22 | 6.68E-01 | 1.00E+00 | -0.88 | 4.10E-02 | 5.22E-01 |

|                   |       |          |          |       |          |          |
|-------------------|-------|----------|----------|-------|----------|----------|
| <b>RUFY2</b>      | -0.23 | 4.10E-01 | 1.00E+00 | -0.31 | 4.10E-02 | 5.22E-01 |
| <b>PPP1R14C</b>   | 0.45  | 2.85E-01 | 1.00E+00 | -1.41 | 4.10E-02 | 5.22E-01 |
| <b>TUBB3</b>      | -0.80 | 5.96E-01 | 1.00E+00 | 1.55  | 4.10E-02 | 5.22E-01 |
| <b>TEX29</b>      | -0.21 | 9.51E-01 | 1.00E+00 | 2.96  | 4.10E-02 | 5.22E-01 |
| <b>AC110609.1</b> | 3.31  | 3.27E-01 | 1.00E+00 | -3.66 | 4.10E-02 | 5.22E-01 |
| <b>AC092868.1</b> | -2.03 | 2.47E-01 | 1.00E+00 | 2.51  | 4.11E-02 | 5.22E-01 |
| <b>AC091868.1</b> | 1.41  | 6.79E-01 | 1.00E+00 | -2.96 | 4.11E-02 | 5.22E-01 |
| <b>COL8A1</b>     | 1.00  | 1.90E-01 | 1.00E+00 | 1.09  | 4.11E-02 | 5.22E-01 |
| <b>AL513548.1</b> | 0.00  | 9.99E-01 | 1.00E+00 | 2.51  | 4.12E-02 | 5.22E-01 |
| <b>LINC00689</b>  | -3.98 | 9.50E-03 | 6.06E-01 | -2.33 | 4.12E-02 | 5.22E-01 |
| <b>OVOL3</b>      | 1.74  | 3.60E-01 | 1.00E+00 | -3.43 | 4.12E-02 | 5.22E-01 |
| <b>RNA5-8SP2</b>  | -1.53 | 2.53E-01 | 1.00E+00 | -1.89 | 4.12E-02 | 5.23E-01 |
| <b>GSTO1</b>      | -0.12 | 4.56E-01 | 1.00E+00 | 0.45  | 4.12E-02 | 5.23E-01 |
| <b>IPO5P1</b>     | 0.33  | 4.79E-01 | 1.00E+00 | -0.66 | 4.13E-02 | 5.24E-01 |
| <b>C17orf51</b>   | 0.21  | 6.38E-01 | 1.00E+00 | 0.72  | 4.14E-02 | 5.24E-01 |
| <b>TMEM59L</b>    | -1.25 | 6.55E-01 | 1.00E+00 | 2.07  | 4.14E-02 | 5.24E-01 |
| <b>PSIP1</b>      | 0.06  | 7.86E-01 | 1.00E+00 | -0.69 | 4.14E-02 | 5.24E-01 |
| <b>AC005410.1</b> | 0.44  | 8.14E-01 | 1.00E+00 | -2.18 | 4.14E-02 | 5.24E-01 |
| <b>SLC9A3-AS1</b> | -0.71 | 5.63E-02 | 1.00E+00 | 1.65  | 4.14E-02 | 5.24E-01 |
| <b>TSPAN11</b>    | 0.09  | 8.16E-01 | 1.00E+00 | 1.50  | 4.15E-02 | 5.24E-01 |
| <b>EP300-AS1</b>  | -0.80 | 2.86E-01 | 1.00E+00 | 0.82  | 4.15E-02 | 5.24E-01 |
| <b>AC004951.2</b> | -1.44 | 1.71E-01 | 1.00E+00 | 1.41  | 4.16E-02 | 5.25E-01 |
| <b>STYX</b>       | -0.06 | 8.09E-01 | 1.00E+00 | -0.50 | 4.16E-02 | 5.25E-01 |
| <b>GPR35</b>      | 0.57  | 3.27E-01 | 1.00E+00 | 2.06  | 4.16E-02 | 5.25E-01 |
| <b>BRMS1</b>      | -0.27 | 2.89E-01 | 1.00E+00 | 0.35  | 4.16E-02 | 5.25E-01 |
| <b>LINC01376</b>  | -0.39 | 5.31E-01 | 1.00E+00 | -1.34 | 4.17E-02 | 5.25E-01 |
| <b>AC005498.3</b> | 0.30  | 6.29E-01 | 1.00E+00 | -1.44 | 4.17E-02 | 5.25E-01 |
| <b>SFMBT2</b>     | 0.27  | 6.68E-01 | 1.00E+00 | 1.80  | 4.17E-02 | 5.25E-01 |
| <b>C1QL2</b>      | -3.96 | 1.11E-03 | 1.75E-01 | -3.10 | 4.17E-02 | 5.25E-01 |
| <b>LGALS1</b>     | 0.27  | 5.79E-01 | 1.00E+00 | -0.84 | 4.18E-02 | 5.25E-01 |
| <b>AC010422.8</b> | 0.28  | 9.25E-01 | 1.00E+00 | 1.71  | 4.18E-02 | 5.25E-01 |
| <b>PTPN6</b>      | -0.39 | 7.42E-02 | 1.00E+00 | 0.74  | 4.18E-02 | 5.25E-01 |

|             |       |          |          |       |          |          |
|-------------|-------|----------|----------|-------|----------|----------|
| ZNF807      | -0.34 | 8.55E-01 | 1.00E+00 | -3.32 | 4.18E-02 | 5.25E-01 |
| BDKRB2      | 0.11  | 7.67E-01 | 1.00E+00 | 0.85  | 4.19E-02 | 5.25E-01 |
| PRXL2A      | 0.50  | 7.12E-02 | 1.00E+00 | -0.63 | 4.20E-02 | 5.27E-01 |
| SPINDOC     | -0.13 | 6.53E-01 | 1.00E+00 | 1.61  | 4.20E-02 | 5.27E-01 |
| NGEF        | -0.34 | 3.57E-01 | 1.00E+00 | -1.11 | 4.21E-02 | 5.27E-01 |
| ISCA1P1     | 0.84  | 8.06E-01 | 1.00E+00 | -1.05 | 4.21E-02 | 5.27E-01 |
| CLEC2L      | -1.38 | 1.96E-01 | 1.00E+00 | -2.33 | 4.21E-02 | 5.27E-01 |
| BEX1        | -1.68 | 7.64E-02 | 1.00E+00 | -1.06 | 4.21E-02 | 5.27E-01 |
| P4HA3       | -0.02 | 9.84E-01 | 1.00E+00 | 2.12  | 4.21E-02 | 5.27E-01 |
| VIPAS39     | 0.07  | 7.14E-01 | 1.00E+00 | 0.31  | 4.22E-02 | 5.27E-01 |
| NDUFA5      | 0.02  | 9.24E-01 | 1.00E+00 | -0.86 | 4.22E-02 | 5.27E-01 |
| XLOC_004672 | 0.14  | 8.40E-01 | 1.00E+00 | 2.17  | 4.22E-02 | 5.27E-01 |
| AC026765.2  | -2.28 | 5.01E-01 | 1.00E+00 | -2.55 | 4.22E-02 | 5.27E-01 |
| ANKRD18A    | -0.23 | 7.31E-01 | 1.00E+00 | -1.32 | 4.23E-02 | 5.27E-01 |
| UGT2B4      | 0.76  | 8.27E-01 | 1.00E+00 | -3.31 | 4.23E-02 | 5.27E-01 |
| AP001610.1  | -2.32 | 4.96E-01 | 1.00E+00 | 2.33  | 4.23E-02 | 5.27E-01 |
| CAMSAP3     | -0.35 | 5.27E-01 | 1.00E+00 | -1.56 | 4.23E-02 | 5.27E-01 |
| ZNF441      | 0.04  | 9.03E-01 | 1.00E+00 | -0.82 | 4.24E-02 | 5.27E-01 |
| CXCR6       | 0.31  | 7.46E-01 | 1.00E+00 | 2.13  | 4.24E-02 | 5.27E-01 |
| AC112191.2  | NA    | NA       | NA       | -1.50 | 4.24E-02 | 5.27E-01 |
| HPSE        | 0.39  | 4.09E-01 | 1.00E+00 | 0.88  | 4.24E-02 | 5.27E-01 |
| PYROXD1     | -0.04 | 8.74E-01 | 1.00E+00 | -0.50 | 4.25E-02 | 5.27E-01 |
| MTRNR2L6    | 1.02  | 7.67E-01 | 1.00E+00 | -1.93 | 4.25E-02 | 5.27E-01 |
| DOCK4       | 0.17  | 6.47E-01 | 1.00E+00 | 1.27  | 4.25E-02 | 5.27E-01 |
| PPIL6       | -0.07 | 8.80E-01 | 1.00E+00 | -0.87 | 4.26E-02 | 5.27E-01 |
| HMG2P3      | -0.18 | 6.49E-01 | 1.00E+00 | -0.81 | 4.26E-02 | 5.27E-01 |
| AAK1        | -0.15 | 6.10E-01 | 1.00E+00 | 0.61  | 4.26E-02 | 5.27E-01 |
| CD27        | -0.96 | 3.18E-01 | 1.00E+00 | 1.53  | 4.26E-02 | 5.27E-01 |
| DAB2IP      | -0.01 | 9.85E-01 | 1.00E+00 | 1.29  | 4.26E-02 | 5.28E-01 |
| S1PR3       | 0.03  | 9.19E-01 | 1.00E+00 | 1.02  | 4.27E-02 | 5.28E-01 |
| SCCPDH      | 0.44  | 1.70E-01 | 1.00E+00 | -0.77 | 4.27E-02 | 5.28E-01 |
| GBA         | 0.14  | 5.21E-01 | 1.00E+00 | 0.50  | 4.28E-02 | 5.29E-01 |

|                    |       |          |          |       |          |          |
|--------------------|-------|----------|----------|-------|----------|----------|
| <b>BTG1</b>        | 0.14  | 5.45E-01 | 1.00E+00 | -0.75 | 4.28E-02 | 5.29E-01 |
| <b>DENND4C</b>     | 0.11  | 6.10E-01 | 1.00E+00 | -0.47 | 4.29E-02 | 5.30E-01 |
| <b>RRS1-AS1</b>    | -2.16 | 2.58E-01 | 1.00E+00 | -2.60 | 4.30E-02 | 5.30E-01 |
| <b>LCTL</b>        | -0.18 | 9.59E-01 | 1.00E+00 | 2.54  | 4.30E-02 | 5.30E-01 |
| <b>PCDHA6</b>      | -3.09 | 9.31E-03 | 6.05E-01 | -2.28 | 4.30E-02 | 5.30E-01 |
| <b>FCHSD1</b>      | 0.10  | 7.67E-01 | 1.00E+00 | 1.01  | 4.30E-02 | 5.30E-01 |
| <b>XLOC_008151</b> | -2.02 | 5.57E-01 | 1.00E+00 | -1.96 | 4.31E-02 | 5.30E-01 |
| <b>AL669831.4</b>  | 0.21  | 7.68E-01 | 1.00E+00 | -1.29 | 4.31E-02 | 5.30E-01 |
| <b>TXNDC15</b>     | 0.12  | 6.25E-01 | 1.00E+00 | 0.43  | 4.31E-02 | 5.30E-01 |
| <b>AC126773.1</b>  | 1.33  | 6.25E-01 | 1.00E+00 | 2.84  | 4.31E-02 | 5.30E-01 |
| <b>TMEM164</b>     | 0.04  | 8.96E-01 | 1.00E+00 | 0.73  | 4.31E-02 | 5.30E-01 |
| <b>LYRM7</b>       | -0.02 | 9.39E-01 | 1.00E+00 | -0.69 | 4.32E-02 | 5.30E-01 |
| <b>AZGP1P1</b>     | 0.61  | 2.72E-01 | 1.00E+00 | 1.01  | 4.32E-02 | 5.30E-01 |
| <b>SRGAP1</b>      | 0.52  | 3.29E-01 | 1.00E+00 | 0.53  | 4.32E-02 | 5.30E-01 |
| <b>SLC12A8</b>     | 0.19  | 7.62E-01 | 1.00E+00 | 0.99  | 4.32E-02 | 5.30E-01 |
| <b>PKM</b>         | -0.22 | 9.80E-02 | 1.00E+00 | 0.46  | 4.33E-02 | 5.30E-01 |
| <b>AC005000.1</b>  | -0.18 | 8.71E-01 | 1.00E+00 | -0.87 | 4.33E-02 | 5.30E-01 |
| <b>ATPAF1</b>      | 0.16  | 6.25E-01 | 1.00E+00 | -1.23 | 4.33E-02 | 5.30E-01 |
| <b>ZNF616</b>      | -0.01 | 9.86E-01 | 1.00E+00 | -0.57 | 4.33E-02 | 5.30E-01 |
| <b>ZNF773</b>      | 0.29  | 2.94E-01 | 1.00E+00 | -0.47 | 4.34E-02 | 5.30E-01 |
| <b>UBALD2</b>      | -0.05 | 8.89E-01 | 1.00E+00 | 1.60  | 4.34E-02 | 5.30E-01 |
| <b>PPIAP29</b>     | 0.74  | 2.16E-01 | 1.00E+00 | -0.71 | 4.34E-02 | 5.30E-01 |
| <b>GOLGA2P7</b>    | 0.00  | 9.99E-01 | 1.00E+00 | 1.30  | 4.34E-02 | 5.30E-01 |
| <b>COMP</b>        | -0.43 | 5.48E-01 | 1.00E+00 | 1.40  | 4.35E-02 | 5.31E-01 |
| <b>AUNIP</b>       | -1.39 | 4.39E-03 | 3.74E-01 | 1.38  | 4.36E-02 | 5.31E-01 |
| <b>PLEKHG2</b>     | -0.24 | 5.30E-01 | 1.00E+00 | 1.57  | 4.36E-02 | 5.31E-01 |
| <b>GRIP2</b>       | 0.34  | 5.64E-01 | 1.00E+00 | 1.53  | 4.36E-02 | 5.31E-01 |
| <b>RDH14</b>       | 0.13  | 6.01E-01 | 1.00E+00 | -0.65 | 4.36E-02 | 5.31E-01 |
| <b>PCGF6</b>       | 0.18  | 5.07E-01 | 1.00E+00 | -0.49 | 4.36E-02 | 5.31E-01 |
| <b>SLC44A3-AS1</b> | -0.41 | 5.97E-01 | 1.00E+00 | 0.79  | 4.38E-02 | 5.33E-01 |
| <b>PALB2</b>       | -0.07 | 7.65E-01 | 1.00E+00 | 0.48  | 4.38E-02 | 5.33E-01 |
| <b>LINC02478</b>   | -0.90 | 5.29E-01 | 1.00E+00 | -2.41 | 4.38E-02 | 5.33E-01 |

|                    |       |          |          |       |          |          |
|--------------------|-------|----------|----------|-------|----------|----------|
| <b>MMD</b>         | 2.47  | 2.53E-03 | 2.58E-01 | -1.23 | 4.39E-02 | 5.33E-01 |
| <b>NOTCH2NLA</b>   | 0.28  | 4.07E-01 | 1.00E+00 | 0.57  | 4.39E-02 | 5.33E-01 |
| <b>AL645933.2</b>  | -0.51 | 4.54E-01 | 1.00E+00 | 1.21  | 4.39E-02 | 5.33E-01 |
| <b>TOP1MT</b>      | 0.14  | 7.14E-01 | 1.00E+00 | 0.58  | 4.40E-02 | 5.33E-01 |
| <b>VASH1</b>       | 0.29  | 6.26E-01 | 1.00E+00 | 1.70  | 4.40E-02 | 5.34E-01 |
| <b>AL513550.1</b>  | -1.10 | 1.45E-03 | 2.09E-01 | -0.96 | 4.40E-02 | 5.34E-01 |
| <b>TRBV2</b>       | -1.20 | 5.66E-01 | 1.00E+00 | 2.80  | 4.41E-02 | 5.34E-01 |
| <b>LPXN</b>        | -0.24 | 5.36E-01 | 1.00E+00 | 0.91  | 4.41E-02 | 5.34E-01 |
| <b>IL10RA</b>      | -0.22 | 6.35E-01 | 1.00E+00 | 1.42  | 4.41E-02 | 5.34E-01 |
| <b>DNASE1L1</b>    | -0.03 | 9.33E-01 | 1.00E+00 | 0.73  | 4.42E-02 | 5.34E-01 |
| <b>IFIH1</b>       | -0.05 | 9.44E-01 | 1.00E+00 | 1.11  | 4.43E-02 | 5.35E-01 |
| <b>MMRN1</b>       | 0.38  | 3.76E-01 | 1.00E+00 | 1.01  | 4.43E-02 | 5.35E-01 |
| <b>WDR26</b>       | -0.10 | 7.88E-01 | 1.00E+00 | 0.72  | 4.43E-02 | 5.35E-01 |
| <b>GPR68</b>       | -0.75 | 3.58E-02 | 1.00E+00 | 1.45  | 4.44E-02 | 5.35E-01 |
| <b>AC092164.1</b>  | 0.26  | 7.39E-01 | 1.00E+00 | -1.14 | 4.44E-02 | 5.35E-01 |
| <b>AC096642.1</b>  | 0.17  | 9.20E-01 | 1.00E+00 | -3.92 | 4.44E-02 | 5.35E-01 |
| <b>FOXQ1</b>       | 0.01  | 9.70E-01 | 1.00E+00 | -1.59 | 4.44E-02 | 5.35E-01 |
| <b>XLOC_009272</b> | -0.74 | 4.37E-01 | 1.00E+00 | -1.92 | 4.44E-02 | 5.35E-01 |
| <b>ZNF503</b>      | 0.28  | 4.34E-01 | 1.00E+00 | 1.55  | 4.44E-02 | 5.35E-01 |
| <b>IGHV3-72</b>    | 1.65  | 6.27E-01 | 1.00E+00 | 4.06  | 4.44E-02 | 5.35E-01 |
| <b>STXBP5-AS1</b>  | 0.00  | 9.91E-01 | 1.00E+00 | 1.30  | 4.45E-02 | 5.35E-01 |
| <b>G20694</b>      | 0.63  | 5.11E-01 | 1.00E+00 | -1.48 | 4.45E-02 | 5.35E-01 |
| <b>AC090206.1</b>  | 1.91  | 5.79E-01 | 1.00E+00 | -2.15 | 4.45E-02 | 5.35E-01 |
| <b>LILRB2</b>      | -0.21 | 6.92E-01 | 1.00E+00 | 1.81  | 4.45E-02 | 5.35E-01 |
| <b>XLOC_012945</b> | -2.16 | 3.22E-01 | 1.00E+00 | -3.16 | 4.45E-02 | 5.35E-01 |
| <b>PREPL</b>       | 0.00  | 9.89E-01 | 1.00E+00 | -0.51 | 4.46E-02 | 5.35E-01 |
| <b>HIF1A-AS2</b>   | 1.25  | 6.51E-01 | 1.00E+00 | 1.59  | 4.47E-02 | 5.36E-01 |
| <b>SLC12A2</b>     | 0.11  | 8.84E-01 | 1.00E+00 | -0.96 | 4.47E-02 | 5.36E-01 |
| <b>SLC17A9</b>     | -0.16 | 7.81E-01 | 1.00E+00 | 1.86  | 4.48E-02 | 5.37E-01 |
| <b>SPRY4</b>       | 0.53  | 2.93E-01 | 1.00E+00 | 1.12  | 4.48E-02 | 5.37E-01 |
| <b>PSTK</b>        | -0.11 | 7.20E-01 | 1.00E+00 | -0.93 | 4.49E-02 | 5.38E-01 |
| <b>ZNF707</b>      | -0.22 | 5.36E-01 | 1.00E+00 | 1.49  | 4.49E-02 | 5.38E-01 |

|                    |       |          |          |       |          |          |
|--------------------|-------|----------|----------|-------|----------|----------|
| <b>SCAF1</b>       | -0.24 | 3.15E-01 | 1.00E+00 | 1.54  | 4.50E-02 | 5.38E-01 |
| <b>GPR18</b>       | -0.90 | 5.74E-01 | 1.00E+00 | 1.46  | 4.50E-02 | 5.38E-01 |
| <b>CLDN11</b>      | 0.09  | 8.54E-01 | 1.00E+00 | 1.13  | 4.51E-02 | 5.38E-01 |
| <b>STRADB</b>      | 0.96  | 1.42E-01 | 1.00E+00 | -1.02 | 4.51E-02 | 5.38E-01 |
| <b>AC145625.1</b>  | 0.73  | 4.18E-01 | 1.00E+00 | 1.78  | 4.51E-02 | 5.38E-01 |
| <b>AC125603.3</b>  | -0.89 | 7.07E-01 | 1.00E+00 | 2.27  | 4.51E-02 | 5.38E-01 |
| <b>TMEM206</b>     | -0.05 | 8.95E-01 | 1.00E+00 | 0.69  | 4.52E-02 | 5.39E-01 |
| <b>ARRDC1</b>      | -0.31 | 3.49E-01 | 1.00E+00 | 0.34  | 4.52E-02 | 5.39E-01 |
| <b>MYPOP</b>       | -0.43 | 1.24E-01 | 1.00E+00 | 1.45  | 4.52E-02 | 5.39E-01 |
| <b>RPE65</b>       | 0.55  | 7.01E-01 | 1.00E+00 | 2.53  | 4.53E-02 | 5.39E-01 |
| <b>NUGGC</b>       | 1.21  | 2.38E-01 | 1.00E+00 | 2.17  | 4.53E-02 | 5.39E-01 |
| <b>SYDE2</b>       | -0.03 | 9.37E-01 | 1.00E+00 | -1.35 | 4.53E-02 | 5.39E-01 |
| <b>SULT4A1</b>     | -2.25 | 3.27E-01 | 1.00E+00 | 2.67  | 4.54E-02 | 5.39E-01 |
| <b>XLOC_014409</b> | -1.06 | 4.70E-01 | 1.00E+00 | -3.87 | 4.54E-02 | 5.40E-01 |
| <b>SAMSN1</b>      | 0.57  | 3.16E-01 | 1.00E+00 | 1.41  | 4.56E-02 | 5.41E-01 |
| <b>ADAMTS12</b>    | 0.16  | 7.89E-01 | 1.00E+00 | 1.37  | 4.56E-02 | 5.41E-01 |
| <b>XLOC_003993</b> | 0.88  | 6.54E-01 | 1.00E+00 | -1.98 | 4.56E-02 | 5.41E-01 |
| <b>GDPD3</b>       | 0.14  | 8.36E-01 | 1.00E+00 | 1.12  | 4.56E-02 | 5.41E-01 |
| <b>AC008946.1</b>  | 1.37  | 2.31E-01 | 1.00E+00 | -1.28 | 4.56E-02 | 5.41E-01 |
| <b>CETN3</b>       | 0.30  | 2.82E-01 | 1.00E+00 | -0.61 | 4.57E-02 | 5.41E-01 |
| <b>LINC01482</b>   | -0.60 | 7.29E-01 | 1.00E+00 | 1.96  | 4.57E-02 | 5.41E-01 |
| <b>CAVIN3</b>      | -0.02 | 9.56E-01 | 1.00E+00 | 0.73  | 4.57E-02 | 5.41E-01 |
| <b>CTSB</b>        | -0.02 | 9.46E-01 | 1.00E+00 | 0.94  | 4.57E-02 | 5.41E-01 |
| <b>TMEM64</b>      | 0.39  | 1.24E-01 | 1.00E+00 | -0.69 | 4.57E-02 | 5.41E-01 |
| <b>PTPRH</b>       | -1.26 | 3.00E-02 | 9.97E-01 | 1.87  | 4.58E-02 | 5.41E-01 |
| <b>XLOC_008971</b> | 0.68  | 5.34E-01 | 1.00E+00 | -2.19 | 4.58E-02 | 5.41E-01 |
| <b>TMEM252</b>     | 0.27  | 6.54E-01 | 1.00E+00 | -2.23 | 4.58E-02 | 5.41E-01 |
| <b>FOXP1-IT1</b>   | 0.18  | 9.53E-01 | 1.00E+00 | -2.11 | 4.58E-02 | 5.41E-01 |
| <b>EIF4E3</b>      | 0.17  | 5.39E-01 | 1.00E+00 | -0.76 | 4.58E-02 | 5.41E-01 |
| <b>ATP5F1E</b>     | 0.13  | 4.33E-01 | 1.00E+00 | -0.71 | 4.59E-02 | 5.41E-01 |
| <b>EIF2AK1</b>     | -0.10 | 5.58E-01 | 1.00E+00 | -0.82 | 4.59E-02 | 5.41E-01 |
| <b>LNX2</b>        | -0.14 | 6.31E-01 | 1.00E+00 | -0.57 | 4.59E-02 | 5.41E-01 |

|                   |       |          |          |       |          |          |
|-------------------|-------|----------|----------|-------|----------|----------|
| <b>RAB4A</b>      | 0.06  | 8.20E-01 | 1.00E+00 | -0.77 | 4.60E-02 | 5.41E-01 |
| <b>AC005476.2</b> | -2.40 | 3.30E-02 | 1.00E+00 | -1.30 | 4.60E-02 | 5.41E-01 |
| <b>CIC</b>        | -0.56 | 8.55E-03 | 5.69E-01 | 1.65  | 4.61E-02 | 5.42E-01 |
| <b>KRBOX1</b>     | 0.20  | 9.12E-01 | 1.00E+00 | -1.63 | 4.61E-02 | 5.42E-01 |
| <b>CACNA1E</b>    | -1.97 | 5.60E-01 | 1.00E+00 | 3.01  | 4.61E-02 | 5.42E-01 |
| <b>GABARAPL2</b>  | 0.22  | 3.60E-01 | 1.00E+00 | -0.62 | 4.61E-02 | 5.42E-01 |
| <b>AC022540.1</b> | -0.32 | 8.61E-01 | 1.00E+00 | 2.19  | 4.62E-02 | 5.42E-01 |
| <b>PUDP</b>       | 0.12  | 6.76E-01 | 1.00E+00 | 0.48  | 4.62E-02 | 5.42E-01 |
| <b>P3H4</b>       | -0.16 | 5.11E-01 | 1.00E+00 | 0.58  | 4.62E-02 | 5.42E-01 |
| <b>AC005392.2</b> | NA    | NA       | NA       | 3.32  | 4.62E-02 | 5.42E-01 |
| <b>CISD3</b>      | -0.19 | 3.45E-01 | 1.00E+00 | -0.46 | 4.63E-02 | 5.43E-01 |
| <b>RRBP1</b>      | -0.33 | 2.60E-01 | 1.00E+00 | 1.12  | 4.63E-02 | 5.43E-01 |
| <b>FGD2</b>       | -0.87 | 2.10E-02 | 8.94E-01 | 1.08  | 4.64E-02 | 5.43E-01 |
| <b>MCEMP1</b>     | NA    | NA       | NA       | 3.11  | 4.64E-02 | 5.43E-01 |
| <b>AC239800.1</b> | -1.12 | 6.38E-01 | 1.00E+00 | -1.85 | 4.64E-02 | 5.43E-01 |
| <b>WDR72</b>      | -0.69 | 2.75E-01 | 1.00E+00 | -1.40 | 4.64E-02 | 5.43E-01 |
| <b>PDGFRL</b>     | 0.88  | 8.72E-02 | 1.00E+00 | 1.16  | 4.65E-02 | 5.43E-01 |
| <b>FMNL1</b>      | 0.11  | 7.57E-01 | 1.00E+00 | 1.40  | 4.65E-02 | 5.43E-01 |
| <b>NUDT22</b>     | -0.22 | 4.12E-01 | 1.00E+00 | 0.44  | 4.65E-02 | 5.43E-01 |
| <b>AC016925.1</b> | NA    | NA       | NA       | -1.57 | 4.65E-02 | 5.43E-01 |
| <b>PARS2</b>      | 0.19  | 4.92E-01 | 1.00E+00 | -0.50 | 4.65E-02 | 5.43E-01 |
| <b>DHX58</b>      | -0.10 | 8.55E-01 | 1.00E+00 | 1.10  | 4.66E-02 | 5.43E-01 |
| <b>PPM1E</b>      | -4.32 | 3.24E-04 | 6.99E-02 | 2.25  | 4.66E-02 | 5.43E-01 |
| <b>AC138969.1</b> | 1.35  | 4.60E-01 | 1.00E+00 | 2.10  | 4.66E-02 | 5.43E-01 |
| <b>RGS20</b>      | -0.38 | 5.57E-01 | 1.00E+00 | 0.90  | 4.67E-02 | 5.43E-01 |
| <b>FBXO7</b>      | 0.12  | 5.60E-01 | 1.00E+00 | -0.31 | 4.67E-02 | 5.43E-01 |
| <b>AGL</b>        | -0.08 | 7.77E-01 | 1.00E+00 | -0.41 | 4.67E-02 | 5.43E-01 |
| <b>PCAT18</b>     | 0.10  | 9.52E-01 | 1.00E+00 | -2.07 | 4.67E-02 | 5.43E-01 |
| <b>CSTF2T</b>     | 0.05  | 8.04E-01 | 1.00E+00 | 0.46  | 4.68E-02 | 5.43E-01 |
| <b>SLC25A40</b>   | 0.09  | 7.26E-01 | 1.00E+00 | -0.63 | 4.68E-02 | 5.43E-01 |
| <b>CCDC71L</b>    | 0.10  | 7.47E-01 | 1.00E+00 | 1.48  | 4.68E-02 | 5.43E-01 |
| <b>NKIRAS1</b>    | 0.47  | 1.35E-01 | 1.00E+00 | -0.76 | 4.68E-02 | 5.43E-01 |

|                   |       |          |          |       |          |          |
|-------------------|-------|----------|----------|-------|----------|----------|
| <b>AKR1D1</b>     | -1.67 | 6.27E-01 | 1.00E+00 | -4.17 | 4.68E-02 | 5.43E-01 |
| <b>FGF5</b>       | -3.56 | 5.01E-02 | 1.00E+00 | 3.86  | 4.69E-02 | 5.43E-01 |
| <b>HLA-DMB</b>    | -0.62 | 1.57E-01 | 1.00E+00 | 0.75  | 4.69E-02 | 5.43E-01 |
| <b>RAB6A</b>      | 0.12  | 5.77E-01 | 1.00E+00 | -0.34 | 4.69E-02 | 5.43E-01 |
| <b>PLCB4</b>      | 0.22  | 6.92E-01 | 1.00E+00 | -0.92 | 4.69E-02 | 5.43E-01 |
| <b>CCDC74B</b>    | 0.17  | 7.69E-01 | 1.00E+00 | 0.71  | 4.69E-02 | 5.43E-01 |
| <b>PLA1A</b>      | -0.37 | 6.04E-01 | 1.00E+00 | 1.99  | 4.69E-02 | 5.43E-01 |
| <b>ANAPC2</b>     | -0.22 | 3.07E-01 | 1.00E+00 | 1.14  | 4.70E-02 | 5.43E-01 |
| <b>TLNRD1</b>     | 0.01  | 9.79E-01 | 1.00E+00 | 1.37  | 4.70E-02 | 5.43E-01 |
| <b>ANO3</b>       | 1.71  | 5.68E-02 | 1.00E+00 | -1.53 | 4.70E-02 | 5.43E-01 |
| <b>TCN2</b>       | 0.47  | 2.59E-01 | 1.00E+00 | 1.04  | 4.71E-02 | 5.43E-01 |
| <b>CCDC114</b>    | -0.19 | 7.55E-01 | 1.00E+00 | -2.16 | 4.71E-02 | 5.43E-01 |
| <b>SETP14</b>     | 0.16  | 8.70E-01 | 1.00E+00 | -0.78 | 4.71E-02 | 5.43E-01 |
| <b>SNX8</b>       | -0.04 | 8.83E-01 | 1.00E+00 | 0.72  | 4.72E-02 | 5.44E-01 |
| <b>MINDY1</b>     | -0.11 | 6.08E-01 | 1.00E+00 | 0.41  | 4.72E-02 | 5.44E-01 |
| <b>LOXL3</b>      | 0.12  | 8.00E-01 | 1.00E+00 | 1.36  | 4.72E-02 | 5.44E-01 |
| <b>SDHAF3</b>     | -0.01 | 9.68E-01 | 1.00E+00 | -0.93 | 4.72E-02 | 5.44E-01 |
| <b>GIMAP5</b>     | 1.39  | 3.05E-01 | 1.00E+00 | 1.54  | 4.73E-02 | 5.45E-01 |
| <b>UBE2FP1</b>    | 0.94  | 2.29E-01 | 1.00E+00 | 1.30  | 4.74E-02 | 5.45E-01 |
| <b>AC093503.1</b> | -1.86 | 5.23E-01 | 1.00E+00 | -2.18 | 4.74E-02 | 5.45E-01 |
| <b>TMEM183B</b>   | -0.62 | 2.69E-01 | 1.00E+00 | -0.83 | 4.74E-02 | 5.45E-01 |
| <b>FSD1</b>       | 1.64  | 3.79E-01 | 1.00E+00 | 2.97  | 4.75E-02 | 5.45E-01 |
| <b>ANAPC16</b>    | 0.09  | 5.87E-01 | 1.00E+00 | -0.52 | 4.75E-02 | 5.45E-01 |
| <b>G4643</b>      | 1.00  | 3.63E-01 | 1.00E+00 | 1.70  | 4.75E-02 | 5.45E-01 |
| <b>FGR</b>        | 0.42  | 2.51E-01 | 1.00E+00 | 1.55  | 4.76E-02 | 5.45E-01 |
| <b>TRBV20-1</b>   | -1.75 | 8.87E-02 | 1.00E+00 | 1.54  | 4.76E-02 | 5.45E-01 |
| <b>Z73979.1</b>   | 1.10  | 1.44E-01 | 1.00E+00 | -1.56 | 4.76E-02 | 5.45E-01 |
| <b>TNFRSF13B</b>  | -1.15 | 5.72E-01 | 1.00E+00 | 3.31  | 4.76E-02 | 5.45E-01 |
| <b>ACAP1</b>      | -0.03 | 9.39E-01 | 1.00E+00 | 1.06  | 4.77E-02 | 5.45E-01 |
| <b>G19426</b>     | -4.10 | 6.89E-02 | 1.00E+00 | -2.61 | 4.77E-02 | 5.45E-01 |
| <b>KMT5B</b>      | 0.07  | 7.05E-01 | 1.00E+00 | -0.55 | 4.77E-02 | 5.45E-01 |
| <b>GNGT2</b>      | 0.02  | 9.70E-01 | 1.00E+00 | 1.13  | 4.77E-02 | 5.45E-01 |



|                        |       |          |          |       |          |          |
|------------------------|-------|----------|----------|-------|----------|----------|
| FAM81A                 | -0.21 | 6.22E-01 | 1.00E+00 | -0.97 | 4.77E-02 | 5.45E-01 |
| DTX2P1-UPK3BP1-PMS2P11 | -1.87 | 2.39E-01 | 1.00E+00 | -1.37 | 4.78E-02 | 5.45E-01 |
| EGOT                   | 0.60  | 5.20E-01 | 1.00E+00 | 1.38  | 4.78E-02 | 5.45E-01 |
| DOK4                   | 0.16  | 6.89E-01 | 1.00E+00 | -0.83 | 4.78E-02 | 5.45E-01 |
| AC025280.3             | -2.24 | 3.17E-01 | 1.00E+00 | 1.76  | 4.78E-02 | 5.46E-01 |
| ARL4C                  | -0.32 | 3.34E-01 | 1.00E+00 | 1.00  | 4.79E-02 | 5.46E-01 |
| CHRM4                  | -0.03 | 9.71E-01 | 1.00E+00 | -2.11 | 4.79E-02 | 5.46E-01 |
| OLIG1                  | -0.53 | 5.95E-01 | 1.00E+00 | -1.69 | 4.80E-02 | 5.47E-01 |
| ASNA1                  | -0.08 | 7.02E-01 | 1.00E+00 | 0.23  | 4.80E-02 | 5.47E-01 |
| IDI1                   | -0.03 | 8.99E-01 | 1.00E+00 | -0.75 | 4.81E-02 | 5.47E-01 |
| GRM5                   | -1.24 | 5.75E-01 | 1.00E+00 | -3.52 | 4.81E-02 | 5.47E-01 |
| PSMC3IP                | 0.02  | 9.41E-01 | 1.00E+00 | 0.49  | 4.82E-02 | 5.47E-01 |
| CXCR1                  | -1.92 | 4.28E-02 | 1.00E+00 | 1.29  | 4.82E-02 | 5.47E-01 |
| PATL1                  | -0.11 | 6.02E-01 | 1.00E+00 | 0.92  | 4.82E-02 | 5.47E-01 |
| QPRT                   | 0.12  | 8.05E-01 | 1.00E+00 | 0.85  | 4.82E-02 | 5.47E-01 |
| PGM5P4                 | -0.74 | 4.11E-02 | 1.00E+00 | -1.31 | 4.82E-02 | 5.48E-01 |
| PEBP1                  | 0.09  | 6.44E-01 | 1.00E+00 | -0.39 | 4.83E-02 | 5.48E-01 |
| FMNL2                  | -0.11 | 7.93E-01 | 1.00E+00 | 1.04  | 4.83E-02 | 5.48E-01 |
| IGLJ2                  | NA    | NA       | NA       | 6.22  | 4.84E-02 | 5.48E-01 |
| STAG3L5P               | -0.23 | 8.66E-01 | 1.00E+00 | 1.29  | 4.84E-02 | 5.48E-01 |
| LEMD1                  | -0.45 | 6.78E-01 | 1.00E+00 | 1.31  | 4.85E-02 | 5.49E-01 |
| FOSL1                  | -3.10 | 2.83E-02 | 9.75E-01 | 1.23  | 4.86E-02 | 5.50E-01 |
| SLC38A9                | 0.28  | 4.79E-01 | 1.00E+00 | 0.65  | 4.86E-02 | 5.50E-01 |
| PLEKHO1                | -0.51 | 1.63E-01 | 1.00E+00 | 1.43  | 4.86E-02 | 5.50E-01 |
| NIPSNAP3B              | 1.00  | 1.45E-01 | 1.00E+00 | -1.28 | 4.87E-02 | 5.50E-01 |
| AC022306.2             | 0.61  | 6.23E-01 | 1.00E+00 | -1.25 | 4.87E-02 | 5.50E-01 |
| XLOC_002113            | -0.36 | 5.84E-01 | 1.00E+00 | -1.14 | 4.87E-02 | 5.50E-01 |
| RGS10                  | -0.35 | 1.22E-01 | 1.00E+00 | 0.51  | 4.87E-02 | 5.50E-01 |
| PLK2                   | -0.61 | 9.82E-02 | 1.00E+00 | 0.60  | 4.88E-02 | 5.50E-01 |
| AL691432.2             | -0.40 | 1.90E-01 | 1.00E+00 | -0.96 | 4.88E-02 | 5.50E-01 |
| RNF128                 | -0.33 | 1.69E-01 | 1.00E+00 | -0.90 | 4.89E-02 | 5.50E-01 |
| COMMD10                | -0.07 | 7.32E-01 | 1.00E+00 | -0.80 | 4.89E-02 | 5.50E-01 |

|                   |       |          |          |       |          |          |
|-------------------|-------|----------|----------|-------|----------|----------|
| <b>AC015908.3</b> | -0.78 | 5.84E-01 | 1.00E+00 | -1.54 | 4.89E-02 | 5.50E-01 |
| <b>RBMS2</b>      | 0.59  | 1.13E-01 | 1.00E+00 | 0.83  | 4.90E-02 | 5.50E-01 |
| <b>ROM1</b>       | -0.11 | 7.42E-01 | 1.00E+00 | 0.52  | 4.90E-02 | 5.50E-01 |
| <b>ARHGAP4</b>    | -0.10 | 7.50E-01 | 1.00E+00 | 1.46  | 4.90E-02 | 5.50E-01 |
| <b>IGF2</b>       | 0.71  | 2.69E-01 | 1.00E+00 | 1.18  | 4.90E-02 | 5.50E-01 |
| <b>G33837</b>     | -0.08 | 9.45E-01 | 1.00E+00 | -2.36 | 4.90E-02 | 5.50E-01 |
| <b>GSG1L</b>      | 0.05  | 9.52E-01 | 1.00E+00 | -2.12 | 4.90E-02 | 5.50E-01 |
| <b>AC004943.1</b> | 1.58  | 2.28E-01 | 1.00E+00 | 2.33  | 4.91E-02 | 5.50E-01 |
| <b>AC004233.3</b> | -1.92 | 5.78E-01 | 1.00E+00 | -2.52 | 4.91E-02 | 5.50E-01 |
| <b>LINC00467</b>  | 0.08  | 8.44E-01 | 1.00E+00 | -0.63 | 4.91E-02 | 5.50E-01 |
| <b>OVCH1</b>      | 0.69  | 6.49E-01 | 1.00E+00 | -2.98 | 4.91E-02 | 5.50E-01 |
| <b>GARS-DT</b>    | 0.17  | 6.26E-01 | 1.00E+00 | -0.59 | 4.92E-02 | 5.50E-01 |
| <b>VWA3B</b>      | -1.11 | 5.61E-01 | 1.00E+00 | 2.16  | 4.92E-02 | 5.50E-01 |
| <b>TRBV27</b>     | 0.43  | 8.26E-01 | 1.00E+00 | 2.54  | 4.92E-02 | 5.50E-01 |
| <b>CCDC173</b>    | -1.18 | 1.82E-01 | 1.00E+00 | 1.40  | 4.92E-02 | 5.50E-01 |
| <b>AL031733.2</b> | 1.78  | 1.83E-01 | 1.00E+00 | 1.69  | 4.92E-02 | 5.50E-01 |
| <b>LCORL</b>      | 0.05  | 8.82E-01 | 1.00E+00 | -0.57 | 4.92E-02 | 5.50E-01 |
| <b>AP001372.2</b> | -0.11 | 7.38E-01 | 1.00E+00 | -0.92 | 4.92E-02 | 5.50E-01 |
| <b>AC004471.1</b> | 0.27  | 8.79E-01 | 1.00E+00 | -2.33 | 4.93E-02 | 5.50E-01 |
| <b>LILRA6</b>     | -0.65 | 3.05E-01 | 1.00E+00 | 1.62  | 4.93E-02 | 5.50E-01 |
| <b>NDST1</b>      | 0.02  | 9.10E-01 | 1.00E+00 | 0.88  | 4.93E-02 | 5.50E-01 |
| <b>ZNF626</b>     | 0.29  | 3.60E-01 | 1.00E+00 | -0.89 | 4.93E-02 | 5.50E-01 |
| <b>G8228</b>      | 0.16  | 8.63E-01 | 1.00E+00 | 1.78  | 4.93E-02 | 5.50E-01 |
| <b>PAWR</b>       | -0.04 | 9.11E-01 | 1.00E+00 | -0.54 | 4.93E-02 | 5.50E-01 |
| <b>GINM1</b>      | 0.15  | 3.72E-01 | 1.00E+00 | -0.38 | 4.93E-02 | 5.50E-01 |
| <b>MMAB</b>       | 0.02  | 9.32E-01 | 1.00E+00 | -0.40 | 4.95E-02 | 5.50E-01 |
| <b>AL357143.1</b> | -1.24 | 7.19E-01 | 1.00E+00 | 3.26  | 4.95E-02 | 5.50E-01 |
| <b>NUBP1</b>      | -0.18 | 2.97E-01 | 1.00E+00 | 0.46  | 4.95E-02 | 5.50E-01 |
| <b>EIF3G</b>      | -0.13 | 4.68E-01 | 1.00E+00 | 0.44  | 4.95E-02 | 5.50E-01 |
| <b>FAH</b>        | 1.08  | 1.27E-01 | 1.00E+00 | -1.05 | 4.95E-02 | 5.50E-01 |
| <b>CHRM1</b>      | -0.36 | 5.36E-01 | 1.00E+00 | -1.34 | 4.95E-02 | 5.50E-01 |
| <b>FCGR2C</b>     | -0.65 | 4.43E-01 | 1.00E+00 | 1.42  | 4.96E-02 | 5.50E-01 |

|                      |       |          |          |       |          |          |
|----------------------|-------|----------|----------|-------|----------|----------|
| <b>CXCR2</b>         | -0.47 | 2.42E-01 | 1.00E+00 | 0.69  | 4.96E-02 | 5.50E-01 |
| <b>LINC01497</b>     | 0.67  | 6.97E-01 | 1.00E+00 | -2.47 | 4.96E-02 | 5.50E-01 |
| <b>PRMT6</b>         | -0.34 | 2.81E-01 | 1.00E+00 | 0.35  | 4.97E-02 | 5.51E-01 |
| <b>POU5F1P5</b>      | 0.19  | 9.55E-01 | 1.00E+00 | 4.33  | 4.97E-02 | 5.51E-01 |
| <b>OAZ3</b>          | -0.12 | 8.99E-01 | 1.00E+00 | -0.68 | 4.98E-02 | 5.51E-01 |
| <b>HNRNPCP1</b>      | 1.19  | 1.46E-01 | 1.00E+00 | 1.89  | 4.98E-02 | 5.51E-01 |
| <b>MAPKAPK5</b>      | -0.17 | 4.11E-01 | 1.00E+00 | -0.37 | 4.98E-02 | 5.51E-01 |
| <b>KLK10</b>         | -0.50 | 2.75E-01 | 1.00E+00 | 1.20  | 4.98E-02 | 5.51E-01 |
| <b>LINC01215</b>     | -0.54 | 8.74E-01 | 1.00E+00 | 3.35  | 4.99E-02 | 5.51E-01 |
| <b>ADAMDEC1</b>      | -0.87 | 2.87E-01 | 1.00E+00 | 2.80  | 5.00E-02 | 5.52E-01 |
| <b>AL138820.1</b>    | 0.13  | 9.65E-01 | 1.00E+00 | -2.74 | 5.00E-02 | 5.52E-01 |
| <b>AC015911.8</b>    | -0.44 | 7.81E-01 | 1.00E+00 | 3.61  | 5.00E-02 | 5.52E-01 |
| <b>AC079944.2</b>    | -0.34 | 6.64E-01 | 1.00E+00 | 1.31  | 5.00E-02 | 5.52E-01 |
| <b>UBE3A</b>         | 0.11  | 5.47E-01 | 1.00E+00 | -0.52 | 5.00E-02 | 5.52E-01 |
| <b>MYH4</b>          | NA    | NA       | NA       | 4.42  | 5.01E-02 | 5.52E-01 |
| <b>RFLNA</b>         | -0.05 | 9.37E-01 | 1.00E+00 | 2.24  | 5.01E-02 | 5.52E-01 |
| <b>AL158063.1</b>    | -1.24 | 7.19E-01 | 1.00E+00 | -3.61 | 5.01E-02 | 5.52E-01 |
| <b>JAK3</b>          | -0.03 | 9.47E-01 | 1.00E+00 | 1.36  | 5.02E-02 | 5.53E-01 |
| <b>MKNK1</b>         | -0.32 | 1.48E-01 | 1.00E+00 | 0.50  | 5.02E-02 | 5.53E-01 |
| <b>HLA-DPB1</b>      | -0.63 | 6.90E-02 | 1.00E+00 | 0.83  | 5.02E-02 | 5.53E-01 |
| <b>METTL15P1</b>     | -2.06 | 2.36E-01 | 1.00E+00 | 1.27  | 5.03E-02 | 5.53E-01 |
| <b>TECPR1</b>        | -0.09 | 6.69E-01 | 1.00E+00 | 1.08  | 5.03E-02 | 5.53E-01 |
| <b>FH</b>            | -0.04 | 7.77E-01 | 1.00E+00 | -0.25 | 5.03E-02 | 5.53E-01 |
| <b>ITM2A</b>         | 0.21  | 6.55E-01 | 1.00E+00 | -0.98 | 5.04E-02 | 5.53E-01 |
| <b>RP11-193H22.2</b> | NA    | NA       | NA       | -4.01 | 5.04E-02 | 5.53E-01 |
| <b>EI24</b>          | 0.12  | 4.24E-01 | 1.00E+00 | -0.79 | 5.04E-02 | 5.53E-01 |
| <b>TXNL4A</b>        | -0.03 | 8.56E-01 | 1.00E+00 | -0.91 | 5.04E-02 | 5.53E-01 |
| <b>TMEM218</b>       | -0.20 | 4.58E-01 | 1.00E+00 | -0.68 | 5.05E-02 | 5.53E-01 |
| <b>USP45</b>         | -0.09 | 8.01E-01 | 1.00E+00 | -0.41 | 5.05E-02 | 5.53E-01 |
| <b>TMEM203</b>       | 0.14  | 5.13E-01 | 1.00E+00 | -1.09 | 5.05E-02 | 5.53E-01 |
| <b>NRTN</b>          | -0.63 | 2.14E-01 | 1.00E+00 | -1.34 | 5.05E-02 | 5.53E-01 |
| <b>INF2</b>          | -0.16 | 5.49E-01 | 1.00E+00 | 1.24  | 5.06E-02 | 5.53E-01 |

|             |       |          |          |       |          |          |
|-------------|-------|----------|----------|-------|----------|----------|
| POLL        | 0.35  | 2.99E-01 | 1.00E+00 | 0.75  | 5.07E-02 | 5.54E-01 |
| DPEP1       | -1.24 | 1.23E-01 | 1.00E+00 | 1.90  | 5.07E-02 | 5.54E-01 |
| AL354892.2  | -0.32 | 7.07E-01 | 1.00E+00 | -1.18 | 5.07E-02 | 5.54E-01 |
| KCNJ8       | 0.45  | 3.86E-01 | 1.00E+00 | 0.89  | 5.07E-02 | 5.54E-01 |
| LKAAEAR1    | -1.14 | 1.87E-01 | 1.00E+00 | -1.77 | 5.07E-02 | 5.54E-01 |
| SDK1        | -0.39 | 3.57E-01 | 1.00E+00 | 1.70  | 5.08E-02 | 5.54E-01 |
| IKZF1       | 0.07  | 8.39E-01 | 1.00E+00 | 1.22  | 5.09E-02 | 5.55E-01 |
| AL391422.1  | 1.23  | 1.65E-01 | 1.00E+00 | 1.73  | 5.09E-02 | 5.55E-01 |
| MIR34AHG    | 0.65  | 4.28E-01 | 1.00E+00 | 1.75  | 5.09E-02 | 5.55E-01 |
| TRIM66      | -0.15 | 7.23E-01 | 1.00E+00 | 1.20  | 5.09E-02 | 5.55E-01 |
| PPIAP11     | 1.15  | 3.50E-01 | 1.00E+00 | -0.81 | 5.10E-02 | 5.55E-01 |
| NEUROD2     | -0.92 | 1.17E-01 | 1.00E+00 | -1.38 | 5.10E-02 | 5.55E-01 |
| MIR4458HG   | -0.60 | 2.87E-02 | 9.87E-01 | -0.98 | 5.11E-02 | 5.55E-01 |
| AL121749.1  | -1.86 | 1.83E-01 | 1.00E+00 | -2.18 | 5.11E-02 | 5.55E-01 |
| KLF13       | 0.16  | 6.21E-01 | 1.00E+00 | 1.11  | 5.11E-02 | 5.55E-01 |
| XLOC_004581 | -0.10 | 8.25E-01 | 1.00E+00 | 1.93  | 5.11E-02 | 5.55E-01 |
| SASH3       | -0.22 | 6.68E-01 | 1.00E+00 | 1.53  | 5.11E-02 | 5.55E-01 |
| AMZ2        | 0.08  | 6.52E-01 | 1.00E+00 | -0.63 | 5.12E-02 | 5.55E-01 |
| PON2        | -0.29 | 2.47E-01 | 1.00E+00 | -0.71 | 5.12E-02 | 5.55E-01 |
| DPH6-DT     | -2.07 | 2.18E-01 | 1.00E+00 | 1.74  | 5.13E-02 | 5.55E-01 |
| DENND6B     | -0.02 | 9.40E-01 | 1.00E+00 | 1.05  | 5.13E-02 | 5.55E-01 |
| CLYBL       | -0.33 | 1.94E-01 | 1.00E+00 | -0.55 | 5.13E-02 | 5.55E-01 |
| SLC4A5      | 1.16  | 2.65E-01 | 1.00E+00 | 1.72  | 5.13E-02 | 5.55E-01 |
| SPATA3      | -2.93 | 2.25E-01 | 1.00E+00 | -2.63 | 5.13E-02 | 5.55E-01 |
| SERPINB3    | -1.29 | 2.71E-01 | 1.00E+00 | 1.78  | 5.13E-02 | 5.55E-01 |
| AC134407.2  | 0.31  | 6.01E-01 | 1.00E+00 | 1.90  | 5.14E-02 | 5.55E-01 |
| PEX19       | 0.43  | 1.41E-01 | 1.00E+00 | -0.65 | 5.14E-02 | 5.55E-01 |
| LMTK3       | -0.59 | 6.86E-02 | 1.00E+00 | 1.24  | 5.14E-02 | 5.55E-01 |
| ARMC1       | 0.29  | 3.52E-01 | 1.00E+00 | -0.36 | 5.14E-02 | 5.55E-01 |
| TSSC4       | -0.04 | 8.72E-01 | 1.00E+00 | 0.40  | 5.14E-02 | 5.55E-01 |
| AC090877.2  | -0.69 | 4.32E-01 | 1.00E+00 | 2.03  | 5.14E-02 | 5.55E-01 |
| ZBTB25      | -0.29 | 3.00E-01 | 1.00E+00 | -0.45 | 5.15E-02 | 5.55E-01 |

|                     |       |          |          |       |          |          |
|---------------------|-------|----------|----------|-------|----------|----------|
| <b>XLOC_012065</b>  | -0.24 | 8.17E-01 | 1.00E+00 | -1.70 | 5.15E-02 | 5.55E-01 |
| HTT                 | 0.19  | 3.24E-01 | 1.00E+00 | 0.89  | 5.15E-02 | 5.55E-01 |
| HILS1               | 0.53  | 6.42E-01 | 1.00E+00 | 2.88  | 5.15E-02 | 5.55E-01 |
| SNX7                | 0.09  | 7.23E-01 | 1.00E+00 | -0.95 | 5.15E-02 | 5.55E-01 |
| STXBP6              | 0.25  | 5.09E-01 | 1.00E+00 | -0.68 | 5.16E-02 | 5.55E-01 |
| NEDD1               | 0.25  | 3.86E-01 | 1.00E+00 | -0.42 | 5.16E-02 | 5.55E-01 |
| HLA-B               | 0.04  | 9.18E-01 | 1.00E+00 | 0.90  | 5.16E-02 | 5.55E-01 |
| NPIP6               | -1.02 | 3.36E-01 | 1.00E+00 | -1.61 | 5.17E-02 | 5.55E-01 |
| WIPF1               | 0.28  | 4.15E-01 | 1.00E+00 | 0.99  | 5.17E-02 | 5.55E-01 |
| ITGAD               | 0.24  | 8.66E-01 | 1.00E+00 | 2.99  | 5.17E-02 | 5.56E-01 |
| DACH1               | -0.33 | 4.98E-01 | 1.00E+00 | -1.01 | 5.18E-02 | 5.56E-01 |
| POU2F3              | -0.12 | 7.67E-01 | 1.00E+00 | -1.40 | 5.18E-02 | 5.56E-01 |
| DNMT3A              | -0.21 | 5.21E-01 | 1.00E+00 | 0.75  | 5.18E-02 | 5.56E-01 |
| ZNF319              | -0.12 | 6.71E-01 | 1.00E+00 | 1.04  | 5.18E-02 | 5.56E-01 |
| SPATA4              | -1.86 | 4.50E-01 | 1.00E+00 | -3.56 | 5.19E-02 | 5.56E-01 |
| POU2F1              | 0.22  | 4.35E-01 | 1.00E+00 | 0.45  | 5.19E-02 | 5.56E-01 |
| HMCES               | -0.11 | 4.99E-01 | 1.00E+00 | -0.30 | 5.19E-02 | 5.56E-01 |
| CDKL4               | -1.08 | 7.35E-01 | 1.00E+00 | -3.26 | 5.19E-02 | 5.56E-01 |
| PRKCE               | -0.06 | 8.52E-01 | 1.00E+00 | 0.88  | 5.20E-02 | 5.56E-01 |
| GRIN2D              | -0.20 | 6.33E-01 | 1.00E+00 | 2.02  | 5.20E-02 | 5.56E-01 |
| <b>AC092142.1</b>   | -2.66 | 3.93E-02 | 1.00E+00 | -1.35 | 5.20E-02 | 5.56E-01 |
| HOXB-AS2            | -0.97 | 2.70E-01 | 1.00E+00 | -1.82 | 5.21E-02 | 5.56E-01 |
| DLEU7               | -1.19 | 2.14E-01 | 1.00E+00 | 1.73  | 5.21E-02 | 5.56E-01 |
| SMIM4               | -0.15 | 6.33E-01 | 1.00E+00 | -0.81 | 5.21E-02 | 5.56E-01 |
| RNU4-62P            | -0.74 | 6.43E-01 | 1.00E+00 | 2.51  | 5.21E-02 | 5.56E-01 |
| LIPT2               | -0.35 | 4.08E-01 | 1.00E+00 | -0.75 | 5.21E-02 | 5.56E-01 |
| KMT2B               | -0.33 | 2.69E-01 | 1.00E+00 | 1.45  | 5.21E-02 | 5.56E-01 |
| IGLV3-27            | 0.56  | 8.71E-01 | 1.00E+00 | 4.75  | 5.21E-02 | 5.56E-01 |
| <b>TMEM56-RWDD3</b> | -0.34 | 8.28E-01 | 1.00E+00 | -1.69 | 5.22E-02 | 5.56E-01 |
| DIS3L               | 0.30  | 1.62E-01 | 1.00E+00 | -0.47 | 5.22E-02 | 5.56E-01 |
| IL24                | -0.62 | 4.02E-01 | 1.00E+00 | 2.05  | 5.22E-02 | 5.56E-01 |
| PSME2               | -0.08 | 8.22E-01 | 1.00E+00 | 0.58  | 5.23E-02 | 5.56E-01 |

|                   |       |          |          |       |          |          |
|-------------------|-------|----------|----------|-------|----------|----------|
| <b>SNTB2</b>      | 0.27  | 1.51E-01 | 1.00E+00 | -0.54 | 5.23E-02 | 5.56E-01 |
| <b>ATP2A1</b>     | 1.18  | 4.27E-01 | 1.00E+00 | 2.64  | 5.23E-02 | 5.56E-01 |
| <b>AP001056.2</b> | 0.01  | 9.90E-01 | 1.00E+00 | 2.04  | 5.24E-02 | 5.57E-01 |
| <b>HSD17B8</b>    | 0.08  | 6.99E-01 | 1.00E+00 | -0.70 | 5.24E-02 | 5.57E-01 |
| <b>IL32</b>       | -0.36 | 5.07E-01 | 1.00E+00 | 1.13  | 5.25E-02 | 5.58E-01 |
| <b>ZMYM3</b>      | -0.09 | 7.10E-01 | 1.00E+00 | 0.79  | 5.26E-02 | 5.58E-01 |
| <b>PRB2</b>       | -0.79 | 3.49E-01 | 1.00E+00 | -1.69 | 5.26E-02 | 5.58E-01 |
| <b>NPIPA1</b>     | 0.04  | 9.41E-01 | 1.00E+00 | 1.18  | 5.26E-02 | 5.58E-01 |
| <b>ARID3A</b>     | -0.08 | 8.56E-01 | 1.00E+00 | 1.28  | 5.26E-02 | 5.58E-01 |
| <b>GVINP1</b>     | 0.48  | 5.20E-01 | 1.00E+00 | 1.61  | 5.26E-02 | 5.58E-01 |
| <b>RNF122</b>     | -0.39 | 4.20E-01 | 1.00E+00 | 1.64  | 5.27E-02 | 5.58E-01 |
| <b>SYCE1L</b>     | 0.08  | 7.99E-01 | 1.00E+00 | -0.69 | 5.27E-02 | 5.58E-01 |
| <b>TMEM178A</b>   | -0.16 | 7.43E-01 | 1.00E+00 | -1.49 | 5.28E-02 | 5.58E-01 |
| <b>PRPS1</b>      | 0.07  | 7.47E-01 | 1.00E+00 | 0.45  | 5.28E-02 | 5.58E-01 |
| <b>RHBDD3</b>     | -0.15 | 6.45E-01 | 1.00E+00 | 0.58  | 5.28E-02 | 5.58E-01 |
| <b>CD3G</b>       | -1.04 | 1.51E-01 | 1.00E+00 | 0.96  | 5.29E-02 | 5.58E-01 |
| <b>AC106820.3</b> | 2.85  | 1.96E-01 | 1.00E+00 | -1.68 | 5.29E-02 | 5.58E-01 |
| <b>ING1</b>       | 0.15  | 4.16E-01 | 1.00E+00 | 0.31  | 5.29E-02 | 5.58E-01 |
| <b>AL122017.1</b> | 2.12  | 5.34E-01 | 1.00E+00 | -2.09 | 5.29E-02 | 5.58E-01 |
| <b>AC007383.2</b> | -0.18 | 6.02E-01 | 1.00E+00 | -0.87 | 5.30E-02 | 5.58E-01 |
| <b>TIAL1</b>      | 0.13  | 3.79E-01 | 1.00E+00 | 0.40  | 5.30E-02 | 5.58E-01 |
| <b>SGPP1</b>      | -0.29 | 3.10E-01 | 1.00E+00 | -1.01 | 5.30E-02 | 5.58E-01 |
| <b>CENPBD1P1</b>  | 0.07  | 7.82E-01 | 1.00E+00 | 0.59  | 5.30E-02 | 5.58E-01 |
| <b>AC104170.1</b> | 1.62  | 1.89E-01 | 1.00E+00 | -1.22 | 5.30E-02 | 5.58E-01 |
| <b>RGS7BP</b>     | -1.82 | 1.50E-02 | 7.62E-01 | -1.46 | 5.30E-02 | 5.58E-01 |
| <b>MECP2</b>      | 0.19  | 5.60E-01 | 1.00E+00 | 0.64  | 5.30E-02 | 5.58E-01 |
| <b>CAMK2B</b>     | -1.60 | 1.15E-02 | 6.65E-01 | -1.41 | 5.31E-02 | 5.59E-01 |
| <b>AC026412.3</b> | -0.30 | 6.42E-01 | 1.00E+00 | 1.21  | 5.31E-02 | 5.59E-01 |
| <b>COX5A</b>      | -0.24 | 1.87E-01 | 1.00E+00 | -0.45 | 5.32E-02 | 5.59E-01 |
| <b>OXCT1-AS1</b>  | 1.87  | 6.18E-02 | 1.00E+00 | -1.58 | 5.33E-02 | 5.59E-01 |
| <b>ACTR3B</b>     | 0.20  | 7.03E-01 | 1.00E+00 | -0.85 | 5.33E-02 | 5.59E-01 |
| <b>PLEKHA2</b>    | 0.25  | 3.31E-01 | 1.00E+00 | 0.94  | 5.33E-02 | 5.59E-01 |

|              |       |          |          |       |          |          |
|--------------|-------|----------|----------|-------|----------|----------|
| LY6G5C       | 0.03  | 9.62E-01 | 1.00E+00 | -0.92 | 5.33E-02 | 5.59E-01 |
| NAGA         | -0.22 | 2.85E-01 | 1.00E+00 | 0.49  | 5.33E-02 | 5.59E-01 |
| INPP5D       | -0.30 | 3.65E-01 | 1.00E+00 | 1.22  | 5.33E-02 | 5.59E-01 |
| UPB1         | 1.25  | 2.47E-01 | 1.00E+00 | -2.19 | 5.33E-02 | 5.59E-01 |
| FAM225A      | -1.23 | 5.39E-01 | 1.00E+00 | 2.19  | 5.34E-02 | 5.59E-01 |
| LINC01963    | 0.67  | 1.38E-01 | 1.00E+00 | -1.05 | 5.34E-02 | 5.59E-01 |
| PODN         | 1.18  | 3.03E-02 | 1.00E+00 | 1.13  | 5.34E-02 | 5.59E-01 |
| AC011939.1   | 1.19  | 7.31E-01 | 1.00E+00 | -1.61 | 5.35E-02 | 5.59E-01 |
| YIPF2        | 0.04  | 8.59E-01 | 1.00E+00 | 0.46  | 5.35E-02 | 5.59E-01 |
| PAFAH1B1     | 0.14  | 4.50E-01 | 1.00E+00 | 0.55  | 5.35E-02 | 5.59E-01 |
| AC008592.3   | -0.83 | 1.42E-01 | 1.00E+00 | 0.73  | 5.36E-02 | 5.59E-01 |
| AC106047.1   | -0.31 | 8.37E-01 | 1.00E+00 | -1.37 | 5.36E-02 | 5.59E-01 |
| XLOC_005754  | -1.34 | 5.84E-01 | 1.00E+00 | -2.61 | 5.36E-02 | 5.59E-01 |
| TRAV9-2      | -1.22 | 6.45E-01 | 1.00E+00 | 1.90  | 5.36E-02 | 5.59E-01 |
| NIT1         | 0.04  | 8.21E-01 | 1.00E+00 | 0.34  | 5.37E-02 | 5.59E-01 |
| AMZ1         | -2.98 | 4.80E-02 | 1.00E+00 | 1.96  | 5.37E-02 | 5.59E-01 |
| ZNF283       | 0.22  | 3.65E-01 | 1.00E+00 | -0.62 | 5.37E-02 | 5.60E-01 |
| SLC25A10     | 0.23  | 5.13E-01 | 1.00E+00 | -0.74 | 5.38E-02 | 5.60E-01 |
| MTMR3        | 0.10  | 6.89E-01 | 1.00E+00 | 0.52  | 5.38E-02 | 5.60E-01 |
| ZNF84        | 0.08  | 7.92E-01 | 1.00E+00 | -0.64 | 5.38E-02 | 5.60E-01 |
| PQLC2        | -0.18 | 5.77E-01 | 1.00E+00 | 0.55  | 5.39E-02 | 5.61E-01 |
| LINC01242    | NA    | NA       | NA       | -4.08 | 5.39E-02 | 5.61E-01 |
| HLA-DRB6     | -0.86 | 3.07E-01 | 1.00E+00 | 0.99  | 5.40E-02 | 5.61E-01 |
| SMIM19       | 0.10  | 5.61E-01 | 1.00E+00 | -0.83 | 5.40E-02 | 5.61E-01 |
| MAOA         | 1.03  | 3.16E-03 | 2.95E-01 | -0.85 | 5.40E-02 | 5.61E-01 |
| ALDH1L2      | -0.05 | 9.32E-01 | 1.00E+00 | 1.02  | 5.41E-02 | 5.62E-01 |
| RBM12        | -0.10 | 4.77E-01 | 1.00E+00 | 0.44  | 5.42E-02 | 5.62E-01 |
| TMEM52       | -1.10 | 2.41E-02 | 9.18E-01 | -1.06 | 5.42E-02 | 5.62E-01 |
| DHX33        | -0.10 | 5.79E-01 | 1.00E+00 | 0.73  | 5.42E-02 | 5.62E-01 |
| DKK3         | -0.07 | 8.27E-01 | 1.00E+00 | 0.51  | 5.42E-02 | 5.62E-01 |
| SCML2P2      | -2.45 | 9.98E-02 | 1.00E+00 | 2.36  | 5.43E-02 | 5.62E-01 |
| TMEM161B-AS1 | -0.16 | 6.54E-01 | 1.00E+00 | -0.86 | 5.44E-02 | 5.63E-01 |

|             |       |          |          |       |          |          |
|-------------|-------|----------|----------|-------|----------|----------|
| LINC02384   | -0.08 | 9.66E-01 | 1.00E+00 | 1.34  | 5.44E-02 | 5.63E-01 |
| G10488      | -1.79 | 1.48E-01 | 1.00E+00 | -2.46 | 5.44E-02 | 5.63E-01 |
| AC027307.2  | 0.07  | 8.62E-01 | 1.00E+00 | 0.82  | 5.44E-02 | 5.63E-01 |
| CFAP43      | -1.38 | 2.82E-02 | 9.75E-01 | -1.60 | 5.45E-02 | 5.63E-01 |
| TRAV13-1    | 0.05  | 9.70E-01 | 1.00E+00 | 1.95  | 5.45E-02 | 5.63E-01 |
| AC022210.1  | -0.86 | 7.00E-01 | 1.00E+00 | -1.71 | 5.45E-02 | 5.63E-01 |
| WASH7P      | 0.14  | 6.60E-01 | 1.00E+00 | 1.17  | 5.45E-02 | 5.63E-01 |
| TNS3        | 0.66  | 1.88E-01 | 1.00E+00 | 1.10  | 5.46E-02 | 5.64E-01 |
| SPNS1       | 0.36  | 7.69E-01 | 1.00E+00 | 1.90  | 5.46E-02 | 5.64E-01 |
| HMG2P5      | 0.15  | 6.35E-01 | 1.00E+00 | -0.72 | 5.47E-02 | 5.64E-01 |
| TRBV4-1     | -2.12 | 3.86E-01 | 1.00E+00 | 2.39  | 5.47E-02 | 5.64E-01 |
| IGHV3-11    | 6.41  | 5.39E-05 | 1.42E-02 | 4.27  | 5.48E-02 | 5.64E-01 |
| CNTNAP1     | -0.28 | 5.62E-01 | 1.00E+00 | 1.69  | 5.48E-02 | 5.64E-01 |
| TPD52L1     | 0.08  | 8.11E-01 | 1.00E+00 | -0.64 | 5.50E-02 | 5.66E-01 |
| SVBP        | -0.09 | 7.60E-01 | 1.00E+00 | -0.78 | 5.51E-02 | 5.67E-01 |
| OXGR1       | 0.09  | 9.21E-01 | 1.00E+00 | -1.24 | 5.51E-02 | 5.67E-01 |
| XLOC_011298 | 0.09  | 9.80E-01 | 1.00E+00 | 2.82  | 5.52E-02 | 5.67E-01 |
| TREX2       | -0.10 | 8.72E-01 | 1.00E+00 | 1.30  | 5.52E-02 | 5.67E-01 |
| IMPA2       | 0.07  | 8.26E-01 | 1.00E+00 | -0.97 | 5.52E-02 | 5.67E-01 |
| TMEM237     | 0.14  | 3.81E-01 | 1.00E+00 | -0.65 | 5.52E-02 | 5.67E-01 |
| CENPB       | -0.23 | 3.21E-01 | 1.00E+00 | 1.22  | 5.52E-02 | 5.67E-01 |
| CEND1       | -0.93 | 4.31E-01 | 1.00E+00 | 2.02  | 5.53E-02 | 5.67E-01 |
| ST8SIA2     | -3.67 | 2.15E-02 | 8.94E-01 | 2.95  | 5.54E-02 | 5.68E-01 |
| DCHS1       | 0.28  | 4.76E-01 | 1.00E+00 | 1.63  | 5.54E-02 | 5.68E-01 |
| XLOC_009092 | -2.62 | 7.99E-02 | 1.00E+00 | -1.84 | 5.55E-02 | 5.68E-01 |
| NOP9        | -0.01 | 9.42E-01 | 1.00E+00 | 1.05  | 5.55E-02 | 5.68E-01 |
| HLA-H       | -0.39 | 5.89E-01 | 1.00E+00 | 0.86  | 5.55E-02 | 5.68E-01 |
| GOLM1       | 0.06  | 8.90E-01 | 1.00E+00 | 0.97  | 5.55E-02 | 5.68E-01 |
| MLLT1       | -0.21 | 3.92E-01 | 1.00E+00 | 1.09  | 5.55E-02 | 5.68E-01 |
| CNTLN       | -0.33 | 2.80E-01 | 1.00E+00 | -0.33 | 5.56E-02 | 5.68E-01 |
| MBD6        | -0.53 | 6.81E-02 | 1.00E+00 | 1.41  | 5.56E-02 | 5.68E-01 |
| FCGR2A      | 0.21  | 5.05E-01 | 1.00E+00 | 1.08  | 5.57E-02 | 5.68E-01 |



|                   |       |          |          |       |          |          |
|-------------------|-------|----------|----------|-------|----------|----------|
| <b>CASC10</b>     | -0.46 | 1.90E-01 | 1.00E+00 | -0.76 | 5.57E-02 | 5.68E-01 |
| <b>COX6A1P2</b>   | -0.29 | 7.34E-01 | 1.00E+00 | -1.12 | 5.57E-02 | 5.68E-01 |
| <b>AL157373.2</b> | -0.12 | 9.14E-01 | 1.00E+00 | -2.10 | 5.57E-02 | 5.68E-01 |
| <b>LINC01943</b>  | -2.78 | 7.45E-02 | 1.00E+00 | 1.59  | 5.58E-02 | 5.69E-01 |
| <b>ZNF667-AS1</b> | 0.51  | 1.59E-01 | 1.00E+00 | -0.98 | 5.58E-02 | 5.69E-01 |
| <b>SYT17</b>      | 0.39  | 3.41E-01 | 1.00E+00 | -0.92 | 5.59E-02 | 5.69E-01 |
| <b>HOGA1</b>      | 0.65  | 3.23E-01 | 1.00E+00 | -1.24 | 5.59E-02 | 5.69E-01 |
| <b>LUM</b>        | 0.63  | 1.99E-01 | 1.00E+00 | 0.96  | 5.59E-02 | 5.69E-01 |
| <b>NFU1</b>       | 0.15  | 6.12E-01 | 1.00E+00 | -0.56 | 5.59E-02 | 5.69E-01 |
| <b>CHPT1</b>      | 0.44  | 1.70E-01 | 1.00E+00 | -1.09 | 5.59E-02 | 5.69E-01 |
| <b>DTX3</b>       | 0.15  | 7.19E-01 | 1.00E+00 | 0.73  | 5.59E-02 | 5.69E-01 |
| <b>STRIP2</b>     | -0.56 | 3.95E-01 | 1.00E+00 | 1.91  | 5.60E-02 | 5.69E-01 |
| <b>DPH6</b>       | -0.22 | 4.80E-01 | 1.00E+00 | -0.58 | 5.60E-02 | 5.69E-01 |
| <b>AL122058.1</b> | -1.56 | 8.10E-02 | 1.00E+00 | -1.65 | 5.62E-02 | 5.71E-01 |
| <b>AP001596.1</b> | 0.15  | 9.29E-01 | 1.00E+00 | -2.26 | 5.63E-02 | 5.71E-01 |
| <b>KIF26B</b>     | -0.38 | 3.99E-01 | 1.00E+00 | 1.43  | 5.63E-02 | 5.71E-01 |
| <b>TTC9C</b>      | 0.05  | 8.30E-01 | 1.00E+00 | 0.40  | 5.63E-02 | 5.71E-01 |
| <b>SMAD2</b>      | 0.09  | 5.28E-01 | 1.00E+00 | -0.35 | 5.63E-02 | 5.71E-01 |
| <b>NLRP3</b>      | 0.23  | 4.66E-01 | 1.00E+00 | 1.32  | 5.64E-02 | 5.71E-01 |
| <b>XAF1</b>       | -0.28 | 7.20E-01 | 1.00E+00 | 1.31  | 5.65E-02 | 5.72E-01 |
| <b>RLN1</b>       | 0.09  | 9.56E-01 | 1.00E+00 | -1.71 | 5.66E-02 | 5.73E-01 |
| <b>LDHAP4</b>     | -0.43 | 6.74E-01 | 1.00E+00 | -1.21 | 5.66E-02 | 5.73E-01 |
| <b>DYNLL2</b>     | 0.15  | 4.47E-01 | 1.00E+00 | 1.21  | 5.67E-02 | 5.73E-01 |
| <b>ADGRG2</b>     | 0.93  | 2.05E-01 | 1.00E+00 | -1.18 | 5.68E-02 | 5.74E-01 |
| <b>FAM200B</b>    | 0.29  | 2.67E-01 | 1.00E+00 | -0.74 | 5.68E-02 | 5.74E-01 |
| <b>SCIN</b>       | -0.36 | 1.94E-01 | 1.00E+00 | -0.73 | 5.69E-02 | 5.75E-01 |
| <b>GPR162</b>     | -0.88 | 1.81E-01 | 1.00E+00 | 2.07  | 5.70E-02 | 5.75E-01 |
| <b>ITIH3</b>      | -1.30 | 1.54E-01 | 1.00E+00 | 2.24  | 5.70E-02 | 5.75E-01 |
| <b>CLDN17</b>     | 1.76  | 4.01E-01 | 1.00E+00 | 2.28  | 5.70E-02 | 5.75E-01 |
| <b>LMCD1-AS1</b>  | -0.78 | 4.04E-01 | 1.00E+00 | 1.12  | 5.70E-02 | 5.75E-01 |
| <b>ZSWIM7</b>     | 0.23  | 2.88E-01 | 1.00E+00 | -0.49 | 5.70E-02 | 5.75E-01 |
| <b>ICAM5</b>      | -2.29 | 1.50E-02 | 7.62E-01 | 2.75  | 5.70E-02 | 5.75E-01 |

|                    |       |          |          |       |          |          |
|--------------------|-------|----------|----------|-------|----------|----------|
| <b>ALDH9A1</b>     | 0.25  | 2.87E-01 | 1.00E+00 | -0.29 | 5.71E-02 | 5.75E-01 |
| <b>JHY</b>         | -0.07 | 8.03E-01 | 1.00E+00 | -0.68 | 5.71E-02 | 5.75E-01 |
| <b>RAB44</b>       | 0.70  | 1.59E-01 | 1.00E+00 | 1.72  | 5.72E-02 | 5.76E-01 |
| <b>PTPRC</b>       | -0.44 | 4.43E-01 | 1.00E+00 | 0.99  | 5.72E-02 | 5.76E-01 |
| <b>VGLL1</b>       | 1.73  | 4.03E-01 | 1.00E+00 | 3.88  | 5.72E-02 | 5.76E-01 |
| <b>EAF1</b>        | 0.15  | 5.95E-01 | 1.00E+00 | 0.47  | 5.73E-02 | 5.76E-01 |
| <b>ZNF138</b>      | -0.57 | 1.51E-01 | 1.00E+00 | -0.79 | 5.74E-02 | 5.77E-01 |
| <b>ARL11</b>       | 0.55  | 2.66E-01 | 1.00E+00 | 1.26  | 5.75E-02 | 5.77E-01 |
| <b>FOLH1</b>       | -0.56 | 3.53E-01 | 1.00E+00 | 0.86  | 5.76E-02 | 5.78E-01 |
| <b>LAMB1</b>       | -0.09 | 7.74E-01 | 1.00E+00 | 1.04  | 5.76E-02 | 5.78E-01 |
| <b>SRP9</b>        | 0.19  | 4.33E-01 | 1.00E+00 | -0.73 | 5.76E-02 | 5.78E-01 |
| <b>PENT</b>        | 0.18  | 6.53E-01 | 1.00E+00 | -0.73 | 5.77E-02 | 5.79E-01 |
| <b>CCDC159</b>     | 0.11  | 7.71E-01 | 1.00E+00 | 0.37  | 5.78E-02 | 5.79E-01 |
| <b>MERTK</b>       | 0.22  | 6.22E-01 | 1.00E+00 | 1.06  | 5.78E-02 | 5.79E-01 |
| <b>GLT8D2</b>      | 0.39  | 3.63E-01 | 1.00E+00 | 0.68  | 5.78E-02 | 5.79E-01 |
| <b>HNRNPA1P50</b>  | -0.25 | 9.41E-01 | 1.00E+00 | -1.97 | 5.78E-02 | 5.79E-01 |
| <b>AKAP13</b>      | -0.10 | 6.09E-01 | 1.00E+00 | 0.40  | 5.79E-02 | 5.79E-01 |
| <b>C11orf1</b>     | -0.22 | 3.33E-01 | 1.00E+00 | -0.71 | 5.79E-02 | 5.79E-01 |
| <b>C14orf28</b>    | 0.15  | 6.21E-01 | 1.00E+00 | -0.64 | 5.79E-02 | 5.79E-01 |
| <b>FLJ46906</b>    | -0.28 | 6.86E-01 | 1.00E+00 | 0.64  | 5.80E-02 | 5.79E-01 |
| <b>DES11</b>       | -0.24 | 3.96E-01 | 1.00E+00 | 0.62  | 5.80E-02 | 5.80E-01 |
| <b>SLC43A3</b>     | -0.08 | 7.32E-01 | 1.00E+00 | 0.49  | 5.81E-02 | 5.80E-01 |
| <b>FAM47E</b>      | -0.85 | 3.63E-01 | 1.00E+00 | -1.29 | 5.81E-02 | 5.80E-01 |
| <b>AC068491.4</b>  | 1.25  | 7.09E-01 | 1.00E+00 | 1.60  | 5.81E-02 | 5.80E-01 |
| <b>ATG9B</b>       | 0.04  | 9.51E-01 | 1.00E+00 | 0.70  | 5.82E-02 | 5.81E-01 |
| <b>LMO7-AS1</b>    | -0.93 | 5.10E-01 | 1.00E+00 | -1.24 | 5.83E-02 | 5.81E-01 |
| <b>XLOC_001341</b> | -0.19 | 9.56E-01 | 1.00E+00 | -1.98 | 5.83E-02 | 5.81E-01 |
| <b>MS4A1</b>       | -1.40 | 3.62E-01 | 1.00E+00 | 2.54  | 5.83E-02 | 5.81E-01 |
| <b>IKBKE</b>       | -0.03 | 9.28E-01 | 1.00E+00 | 0.71  | 5.83E-02 | 5.81E-01 |
| <b>PYCR1</b>       | -0.79 | 4.95E-02 | 1.00E+00 | 0.62  | 5.84E-02 | 5.81E-01 |
| <b>HCG22</b>       | 0.92  | 3.26E-01 | 1.00E+00 | 2.65  | 5.84E-02 | 5.81E-01 |
| <b>AC124276.1</b>  | -0.71 | 5.86E-01 | 1.00E+00 | -2.75 | 5.85E-02 | 5.81E-01 |

|                    |       |          |          |       |          |          |
|--------------------|-------|----------|----------|-------|----------|----------|
| <b>CYP2E1</b>      | -0.05 | 9.47E-01 | 1.00E+00 | -1.28 | 5.85E-02 | 5.81E-01 |
| <b>SMIM34B</b>     | -0.89 | 4.77E-01 | 1.00E+00 | 1.57  | 5.85E-02 | 5.81E-01 |
| <b>TMEM119</b>     | -0.05 | 8.94E-01 | 1.00E+00 | 1.21  | 5.85E-02 | 5.81E-01 |
| <b>LINC00672</b>   | -1.19 | 3.54E-01 | 1.00E+00 | 1.77  | 5.85E-02 | 5.81E-01 |
| <b>BCL9L</b>       | -0.55 | 3.88E-02 | 1.00E+00 | 1.65  | 5.85E-02 | 5.81E-01 |
| <b>DENND3</b>      | 0.55  | 1.85E-01 | 1.00E+00 | 1.44  | 5.86E-02 | 5.81E-01 |
| <b>PIK3CG</b>      | 0.33  | 5.11E-01 | 1.00E+00 | 1.32  | 5.86E-02 | 5.81E-01 |
| <b>TCEA1</b>       | 0.16  | 4.45E-01 | 1.00E+00 | -0.34 | 5.86E-02 | 5.81E-01 |
| <b>CRNN</b>        | -0.69 | 3.14E-01 | 1.00E+00 | 1.56  | 5.86E-02 | 5.81E-01 |
| <b>AL390036.1</b>  | -0.50 | 7.70E-01 | 1.00E+00 | 1.36  | 5.87E-02 | 5.81E-01 |
| <b>ISOC1</b>       | 0.13  | 5.40E-01 | 1.00E+00 | -0.79 | 5.87E-02 | 5.81E-01 |
| <b>SURF1</b>       | -0.08 | 7.58E-01 | 1.00E+00 | -0.90 | 5.87E-02 | 5.81E-01 |
| <b>XLOC_004431</b> | 0.78  | 4.02E-01 | 1.00E+00 | -2.41 | 5.87E-02 | 5.81E-01 |
| <b>MPC2</b>        | 0.10  | 6.58E-01 | 1.00E+00 | -0.85 | 5.87E-02 | 5.81E-01 |
| <b>SLC14A2</b>     | 2.27  | 5.18E-02 | 1.00E+00 | -1.97 | 5.88E-02 | 5.81E-01 |
| <b>AKAP3</b>       | -0.78 | 4.82E-02 | 1.00E+00 | -1.13 | 5.89E-02 | 5.81E-01 |
| <b>AC023301.1</b>  | -0.37 | 8.08E-01 | 1.00E+00 | -2.60 | 5.89E-02 | 5.81E-01 |
| <b>AC010624.1</b>  | -2.85 | 3.19E-01 | 1.00E+00 | 2.62  | 5.89E-02 | 5.81E-01 |
| <b>CBFB</b>        | -0.02 | 9.33E-01 | 1.00E+00 | -0.56 | 5.89E-02 | 5.81E-01 |
| <b>HADHAP2</b>     | -0.46 | 7.75E-01 | 1.00E+00 | -1.08 | 5.90E-02 | 5.81E-01 |
| <b>SKIDA1</b>      | 0.25  | 6.65E-01 | 1.00E+00 | -0.82 | 5.90E-02 | 5.81E-01 |
| <b>AC012360.2</b>  | 2.38  | 3.04E-01 | 1.00E+00 | -2.25 | 5.90E-02 | 5.81E-01 |
| <b>AL139353.1</b>  | -0.24 | 8.23E-01 | 1.00E+00 | -1.12 | 5.90E-02 | 5.81E-01 |
| <b>HIST2H3DP1</b>  | 0.88  | 6.25E-01 | 1.00E+00 | 1.86  | 5.91E-02 | 5.81E-01 |
| <b>FUT4</b>        | 0.08  | 8.38E-01 | 1.00E+00 | 1.48  | 5.91E-02 | 5.81E-01 |
| <b>ZNF677</b>      | 0.02  | 9.34E-01 | 1.00E+00 | -0.61 | 5.91E-02 | 5.81E-01 |
| <b>IRS3P</b>       | 1.20  | 5.68E-01 | 1.00E+00 | 2.36  | 5.91E-02 | 5.81E-01 |
| <b>PIWIL2</b>      | 0.66  | 3.16E-01 | 1.00E+00 | -2.02 | 5.91E-02 | 5.81E-01 |
| <b>DHTKD1</b>      | 0.07  | 6.87E-01 | 1.00E+00 | -0.42 | 5.91E-02 | 5.81E-01 |
| <b>NOCT</b>        | -1.06 | 2.07E-02 | 8.94E-01 | 1.08  | 5.92E-02 | 5.81E-01 |
| <b>PCDHGA12</b>    | 0.05  | 8.33E-01 | 1.00E+00 | 1.18  | 5.92E-02 | 5.82E-01 |
| <b>AC018644.1</b>  | 0.41  | 8.06E-01 | 1.00E+00 | 2.50  | 5.93E-02 | 5.82E-01 |

|                     |       |          |          |       |          |          |
|---------------------|-------|----------|----------|-------|----------|----------|
| <b>G33706</b>       | -0.14 | 9.38E-01 | 1.00E+00 | -1.08 | 5.94E-02 | 5.82E-01 |
| <b>XPR1</b>         | -0.13 | 5.97E-01 | 1.00E+00 | 0.62  | 5.94E-02 | 5.82E-01 |
| <b>GPR107</b>       | 0.13  | 5.60E-01 | 1.00E+00 | 0.71  | 5.94E-02 | 5.82E-01 |
| <b>ZNF91</b>        | 0.17  | 5.24E-01 | 1.00E+00 | -0.65 | 5.94E-02 | 5.82E-01 |
| <b>HADHB</b>        | -0.04 | 8.50E-01 | 1.00E+00 | -0.32 | 5.94E-02 | 5.82E-01 |
| <b>CCDC144B</b>     | 0.90  | 3.60E-01 | 1.00E+00 | -1.06 | 5.95E-02 | 5.82E-01 |
| <b>MTSS1L</b>       | -0.31 | 2.96E-01 | 1.00E+00 | 1.31  | 5.95E-02 | 5.82E-01 |
| <b>AL450322.2</b>   | -1.79 | 2.16E-01 | 1.00E+00 | 1.78  | 5.95E-02 | 5.82E-01 |
| <b>XLOC_004625</b>  | 0.38  | 9.14E-01 | 1.00E+00 | -3.04 | 5.95E-02 | 5.82E-01 |
| <b>CLDN10</b>       | 0.18  | 8.87E-01 | 1.00E+00 | -1.42 | 5.96E-02 | 5.82E-01 |
| <b>BTN3A1</b>       | 0.07  | 8.59E-01 | 1.00E+00 | 0.79  | 5.96E-02 | 5.82E-01 |
| <b>KLK14</b>        | -0.31 | 5.92E-01 | 1.00E+00 | 1.22  | 5.96E-02 | 5.82E-01 |
| <b>RPS15AP10</b>    | -0.31 | 8.67E-01 | 1.00E+00 | -1.86 | 5.97E-02 | 5.83E-01 |
| <b>SARAF</b>        | 0.13  | 4.06E-01 | 1.00E+00 | -0.37 | 5.97E-02 | 5.83E-01 |
| <b>ZNF143</b>       | 0.03  | 8.71E-01 | 1.00E+00 | -0.31 | 5.97E-02 | 5.83E-01 |
| <b>RP11-782C8.1</b> | -0.63 | 4.57E-01 | 1.00E+00 | -1.04 | 5.97E-02 | 5.83E-01 |
| <b>ITGAX</b>        | -0.24 | 7.04E-01 | 1.00E+00 | 1.70  | 5.98E-02 | 5.83E-01 |
| <b>NAMPT</b>        | -0.32 | 2.52E-01 | 1.00E+00 | 0.76  | 5.98E-02 | 5.83E-01 |
| <b>COL6A2</b>       | -0.02 | 9.54E-01 | 1.00E+00 | 1.46  | 5.98E-02 | 5.83E-01 |
| <b>RAB43</b>        | -0.34 | 3.91E-01 | 1.00E+00 | 1.70  | 5.99E-02 | 5.83E-01 |
| <b>RBMX2</b>        | 0.06  | 6.87E-01 | 1.00E+00 | 0.45  | 5.99E-02 | 5.83E-01 |
| <b>PRELID3A</b>     | -0.69 | 1.77E-01 | 1.00E+00 | 1.41  | 5.99E-02 | 5.83E-01 |
| <b>SOWAHD</b>       | -1.48 | 1.70E-02 | 8.22E-01 | 2.34  | 5.99E-02 | 5.83E-01 |
| <b>ANO8</b>         | -0.26 | 5.91E-01 | 1.00E+00 | 1.72  | 6.00E-02 | 5.83E-01 |
| <b>MGRN1</b>        | -0.21 | 3.06E-01 | 1.00E+00 | 1.05  | 6.00E-02 | 5.83E-01 |
| <b>UBE2R2-AS1</b>   | 1.25  | 3.35E-01 | 1.00E+00 | 2.52  | 6.01E-02 | 5.83E-01 |
| <b>TXLNB</b>        | 0.14  | 7.48E-01 | 1.00E+00 | 1.27  | 6.01E-02 | 5.83E-01 |
| <b>ARMH4</b>        | -0.31 | 4.59E-01 | 1.00E+00 | -0.53 | 6.01E-02 | 5.83E-01 |
| <b>GULP1</b>        | -0.07 | 7.91E-01 | 1.00E+00 | -0.67 | 6.01E-02 | 5.83E-01 |
| <b>CDC37L1</b>      | 0.14  | 4.77E-01 | 1.00E+00 | -0.48 | 6.01E-02 | 5.83E-01 |
| <b>TEKT1</b>        | -0.89 | 7.93E-01 | 1.00E+00 | 2.03  | 6.01E-02 | 5.83E-01 |
| <b>AL355355.1</b>   | 0.53  | 5.67E-01 | 1.00E+00 | -1.66 | 6.02E-02 | 5.84E-01 |

|                    |       |          |          |       |          |          |
|--------------------|-------|----------|----------|-------|----------|----------|
| <b>AC135977.1</b>  | 0.82  | 7.53E-01 | 1.00E+00 | -1.90 | 6.03E-02 | 5.84E-01 |
| <b>AL118508.1</b>  | 0.01  | 9.94E-01 | 1.00E+00 | -1.60 | 6.03E-02 | 5.84E-01 |
| <b>DUT</b>         | 0.19  | 3.38E-01 | 1.00E+00 | -0.74 | 6.03E-02 | 5.84E-01 |
| <b>KCNK12</b>      | -0.41 | 6.67E-01 | 1.00E+00 | 2.27  | 6.04E-02 | 5.84E-01 |
| <b>CRMP1</b>       | 0.13  | 7.48E-01 | 1.00E+00 | 1.09  | 6.04E-02 | 5.84E-01 |
| <b>OCRL</b>        | 0.09  | 6.80E-01 | 1.00E+00 | 0.58  | 6.04E-02 | 5.85E-01 |
| <b>MSL3</b>        | 0.39  | 2.27E-01 | 1.00E+00 | 0.40  | 6.04E-02 | 5.85E-01 |
| <b>REEP1</b>       | 0.25  | 5.57E-01 | 1.00E+00 | -1.13 | 6.05E-02 | 5.85E-01 |
| <b>MEIG1</b>       | -2.77 | 1.54E-01 | 1.00E+00 | -2.20 | 6.06E-02 | 5.85E-01 |
| <b>MIIP</b>        | -0.49 | 8.27E-02 | 1.00E+00 | 0.39  | 6.06E-02 | 5.85E-01 |
| <b>NDST1-AS1</b>   | 0.69  | 7.61E-01 | 1.00E+00 | -1.48 | 6.06E-02 | 5.85E-01 |
| <b>SEMA7A</b>      | -0.26 | 5.94E-01 | 1.00E+00 | 1.51  | 6.06E-02 | 5.85E-01 |
| <b>TMX2P1</b>      | 0.25  | 5.23E-01 | 1.00E+00 | 1.08  | 6.06E-02 | 5.85E-01 |
| <b>WSCD2</b>       | -0.09 | 8.87E-01 | 1.00E+00 | -1.61 | 6.06E-02 | 5.85E-01 |
| <b>GSPT1</b>       | 0.15  | 3.50E-01 | 1.00E+00 | -0.71 | 6.07E-02 | 5.85E-01 |
| <b>ABCD1</b>       | -0.33 | 4.37E-01 | 1.00E+00 | 1.36  | 6.08E-02 | 5.85E-01 |
| <b>SOX9-AS1</b>    | -1.00 | 1.18E-01 | 1.00E+00 | -1.12 | 6.08E-02 | 5.85E-01 |
| <b>NRARP</b>       | -1.74 | 2.16E-02 | 8.94E-01 | -1.35 | 6.08E-02 | 5.85E-01 |
| <b>CD300LG</b>     | 1.07  | 2.12E-01 | 1.00E+00 | -1.40 | 6.08E-02 | 5.85E-01 |
| <b>ZFPM2-AS1</b>   | 1.76  | 4.11E-01 | 1.00E+00 | -2.33 | 6.08E-02 | 5.85E-01 |
| <b>FAM111A</b>     | 0.00  | 9.96E-01 | 1.00E+00 | 0.41  | 6.08E-02 | 5.85E-01 |
| <b>STIM2</b>       | -0.13 | 5.37E-01 | 1.00E+00 | -0.58 | 6.08E-02 | 5.85E-01 |
| <b>GPR160</b>      | 0.57  | 3.33E-01 | 1.00E+00 | -0.91 | 6.09E-02 | 5.85E-01 |
| <b>FER1L6</b>      | 1.75  | 4.51E-01 | 1.00E+00 | 3.36  | 6.09E-02 | 5.85E-01 |
| <b>RAB1C</b>       | -0.58 | 8.67E-01 | 1.00E+00 | 1.51  | 6.09E-02 | 5.85E-01 |
| <b>TMEM70</b>      | 0.08  | 7.54E-01 | 1.00E+00 | -0.46 | 6.10E-02 | 5.85E-01 |
| <b>AL603756.1</b>  | 1.27  | 4.02E-01 | 1.00E+00 | 1.53  | 6.10E-02 | 5.85E-01 |
| <b>MIR4435-2HG</b> | 0.70  | 7.12E-02 | 1.00E+00 | 0.94  | 6.10E-02 | 5.85E-01 |
| <b>SUCLG2-AS1</b>  | 0.30  | 6.90E-01 | 1.00E+00 | -1.14 | 6.10E-02 | 5.85E-01 |
| <b>PCDH9</b>       | 0.38  | 6.08E-01 | 1.00E+00 | -1.12 | 6.11E-02 | 5.85E-01 |
| <b>TRIM34</b>      | -1.09 | 6.50E-01 | 1.00E+00 | 1.46  | 6.11E-02 | 5.85E-01 |
| <b>PDHA1</b>       | 0.05  | 8.57E-01 | 1.00E+00 | -0.44 | 6.11E-02 | 5.85E-01 |

|             |       |          |          |       |          |          |
|-------------|-------|----------|----------|-------|----------|----------|
| PARVB       | 0.33  | 3.27E-01 | 1.00E+00 | 0.73  | 6.11E-02 | 5.85E-01 |
| RHOT1       | 0.27  | 4.60E-01 | 1.00E+00 | -0.58 | 6.12E-02 | 5.85E-01 |
| IRS1        | 0.14  | 7.02E-01 | 1.00E+00 | 1.00  | 6.12E-02 | 5.85E-01 |
| IGF2R       | 0.43  | 1.47E-01 | 1.00E+00 | 1.18  | 6.12E-02 | 5.85E-01 |
| RNF13       | -0.13 | 4.38E-01 | 1.00E+00 | -0.50 | 6.12E-02 | 5.85E-01 |
| MKRN3       | -0.24 | 8.05E-01 | 1.00E+00 | -2.09 | 6.13E-02 | 5.86E-01 |
| DOK5        | 0.78  | 3.31E-01 | 1.00E+00 | 0.86  | 6.14E-02 | 5.86E-01 |
| ALDH1A2     | 0.66  | 3.01E-01 | 1.00E+00 | -1.02 | 6.14E-02 | 5.86E-01 |
| ROS1        | 0.08  | 9.76E-01 | 1.00E+00 | -3.75 | 6.15E-02 | 5.86E-01 |
| AP001830.1  | -2.28 | 4.71E-02 | 1.00E+00 | -1.43 | 6.15E-02 | 5.86E-01 |
| BHLHE22     | -0.55 | 3.30E-01 | 1.00E+00 | 1.53  | 6.15E-02 | 5.86E-01 |
| WASHC1      | -0.36 | 3.17E-01 | 1.00E+00 | 0.58  | 6.15E-02 | 5.86E-01 |
| XLOC_014271 | 1.17  | 5.59E-01 | 1.00E+00 | -2.86 | 6.16E-02 | 5.86E-01 |
| FOLR3       | -0.20 | 8.48E-01 | 1.00E+00 | 1.52  | 6.16E-02 | 5.86E-01 |
| PAIP1       | 0.05  | 8.10E-01 | 1.00E+00 | -0.57 | 6.16E-02 | 5.86E-01 |
| APH1A       | 0.18  | 3.16E-01 | 1.00E+00 | 0.57  | 6.16E-02 | 5.86E-01 |
| SCGB3A1     | 1.24  | 2.02E-01 | 1.00E+00 | -1.08 | 6.16E-02 | 5.86E-01 |
| NKX2-5      | -3.60 | 3.58E-02 | 1.00E+00 | 1.39  | 6.17E-02 | 5.86E-01 |
| DAPK3       | -0.21 | 3.68E-01 | 1.00E+00 | 0.62  | 6.17E-02 | 5.86E-01 |
| TLR3        | 0.09  | 8.42E-01 | 1.00E+00 | 0.67  | 6.17E-02 | 5.86E-01 |
| ZFHX4       | 0.96  | 1.75E-01 | 1.00E+00 | 0.87  | 6.17E-02 | 5.86E-01 |
| HLA-DQA2    | -1.92 | 1.45E-03 | 2.09E-01 | 1.54  | 6.18E-02 | 5.87E-01 |
| SLC25A4     | 0.02  | 9.65E-01 | 1.00E+00 | -0.57 | 6.18E-02 | 5.87E-01 |
| AL031432.4  | -1.11 | 3.01E-01 | 1.00E+00 | -1.78 | 6.19E-02 | 5.87E-01 |
| PMS2P1      | -0.06 | 8.42E-01 | 1.00E+00 | -0.53 | 6.19E-02 | 5.87E-01 |
| LINC02551   | -0.97 | 5.61E-01 | 1.00E+00 | 2.48  | 6.20E-02 | 5.87E-01 |
| HLA-DOA     | -0.79 | 3.63E-02 | 1.00E+00 | 1.12  | 6.20E-02 | 5.87E-01 |
| G32185      | -0.94 | 7.85E-01 | 1.00E+00 | 2.67  | 6.20E-02 | 5.87E-01 |
| YIPF3       | -0.09 | 6.30E-01 | 1.00E+00 | 0.22  | 6.20E-02 | 5.87E-01 |
| PSD3        | 0.06  | 8.66E-01 | 1.00E+00 | 0.54  | 6.20E-02 | 5.87E-01 |
| AC005041.3  | -0.73 | 6.46E-01 | 1.00E+00 | 1.76  | 6.20E-02 | 5.87E-01 |
| TRIO        | 0.11  | 6.28E-01 | 1.00E+00 | 1.14  | 6.21E-02 | 5.87E-01 |

|             |       |          |          |       |          |          |
|-------------|-------|----------|----------|-------|----------|----------|
| TNRC18      | -0.50 | 9.07E-02 | 1.00E+00 | 1.66  | 6.21E-02 | 5.87E-01 |
| RRAGC       | 0.13  | 5.43E-01 | 1.00E+00 | 0.40  | 6.21E-02 | 5.87E-01 |
| HYPK        | 2.08  | 3.06E-03 | 2.89E-01 | -1.00 | 6.22E-02 | 5.87E-01 |
| PAG1        | 0.05  | 8.73E-01 | 1.00E+00 | 0.56  | 6.22E-02 | 5.87E-01 |
| TCTA        | 0.09  | 7.68E-01 | 1.00E+00 | -0.46 | 6.22E-02 | 5.87E-01 |
| STON2       | -0.59 | 2.47E-02 | 9.28E-01 | 0.50  | 6.22E-02 | 5.87E-01 |
| G22722      | 0.47  | 5.21E-01 | 1.00E+00 | -2.38 | 6.24E-02 | 5.88E-01 |
| G43442      | -2.32 | 4.29E-01 | 1.00E+00 | 2.28  | 6.24E-02 | 5.88E-01 |
| EEF1A1P14   | -2.72 | 4.11E-01 | 1.00E+00 | 1.77  | 6.24E-02 | 5.88E-01 |
| RMI2        | -0.09 | 8.18E-01 | 1.00E+00 | -1.27 | 6.25E-02 | 5.88E-01 |
| IGFBP4      | 0.47  | 2.01E-01 | 1.00E+00 | 1.33  | 6.25E-02 | 5.88E-01 |
| CSF1R       | -0.19 | 6.69E-01 | 1.00E+00 | 1.02  | 6.25E-02 | 5.88E-01 |
| ZNF256      | -0.36 | 3.11E-01 | 1.00E+00 | -0.81 | 6.26E-02 | 5.88E-01 |
| FXVD2       | -0.91 | 6.17E-01 | 1.00E+00 | 1.58  | 6.26E-02 | 5.88E-01 |
| ZNF426-DT   | 0.43  | 5.40E-01 | 1.00E+00 | -1.21 | 6.26E-02 | 5.88E-01 |
| AC025034.1  | 0.19  | 8.73E-01 | 1.00E+00 | 1.84  | 6.26E-02 | 5.88E-01 |
| NUDT12      | -0.04 | 9.02E-01 | 1.00E+00 | -0.51 | 6.27E-02 | 5.88E-01 |
| CALCR       | -1.29 | 5.09E-01 | 1.00E+00 | 2.54  | 6.27E-02 | 5.88E-01 |
| MAP4K3      | 0.26  | 3.20E-01 | 1.00E+00 | -0.66 | 6.27E-02 | 5.88E-01 |
| XLOC_007094 | 0.58  | 8.01E-01 | 1.00E+00 | -2.53 | 6.27E-02 | 5.88E-01 |
| AC092881.1  | 2.87  | 1.92E-01 | 1.00E+00 | -2.62 | 6.27E-02 | 5.88E-01 |
| MTATP6P1    | 0.07  | 9.21E-01 | 1.00E+00 | -1.07 | 6.27E-02 | 5.88E-01 |
| ABCG1       | -0.01 | 9.68E-01 | 1.00E+00 | 0.88  | 6.28E-02 | 5.88E-01 |
| AC015802.3  | -2.55 | 1.83E-01 | 1.00E+00 | -1.54 | 6.28E-02 | 5.89E-01 |
| STK16       | -0.14 | 4.61E-01 | 1.00E+00 | 0.39  | 6.29E-02 | 5.89E-01 |
| TANC2       | -0.35 | 1.34E-01 | 1.00E+00 | 0.89  | 6.29E-02 | 5.89E-01 |
| NDUFB2      | 0.27  | 2.12E-01 | 1.00E+00 | -1.03 | 6.30E-02 | 5.89E-01 |
| HNRNPKP2    | -1.68 | 6.27E-01 | 1.00E+00 | -0.95 | 6.30E-02 | 5.89E-01 |
| CCDC18-AS1  | 0.14  | 7.69E-01 | 1.00E+00 | 0.61  | 6.30E-02 | 5.89E-01 |
| ZNF772      | 0.49  | 2.25E-01 | 1.00E+00 | -0.85 | 6.31E-02 | 5.89E-01 |
| AC087501.4  | -0.69 | 4.45E-01 | 1.00E+00 | 0.93  | 6.31E-02 | 5.89E-01 |
| CCDC88B     | -0.15 | 7.71E-01 | 1.00E+00 | 1.70  | 6.31E-02 | 5.89E-01 |

|              |       |          |          |       |          |          |
|--------------|-------|----------|----------|-------|----------|----------|
| ZNF676       | -1.28 | 2.66E-01 | 1.00E+00 | -1.52 | 6.31E-02 | 5.89E-01 |
| ACKR2        | 0.05  | 9.21E-01 | 1.00E+00 | 1.13  | 6.31E-02 | 5.89E-01 |
| ZNF879       | 0.26  | 4.82E-01 | 1.00E+00 | -0.74 | 6.32E-02 | 5.90E-01 |
| NMRK1        | 0.25  | 1.78E-01 | 1.00E+00 | -0.45 | 6.33E-02 | 5.90E-01 |
| NANOS3       | 0.00  | 9.97E-01 | 1.00E+00 | -1.40 | 6.34E-02 | 5.91E-01 |
| CCL4         | -0.94 | 2.33E-01 | 1.00E+00 | 1.22  | 6.34E-02 | 5.91E-01 |
| SHLD2P1      | 1.43  | 5.10E-01 | 1.00E+00 | 1.23  | 6.34E-02 | 5.91E-01 |
| SUSD6        | 0.00  | 9.93E-01 | 1.00E+00 | 0.61  | 6.35E-02 | 5.91E-01 |
| TRADD        | -0.28 | 3.05E-01 | 1.00E+00 | 0.38  | 6.35E-02 | 5.91E-01 |
| MCCC2        | 0.02  | 9.17E-01 | 1.00E+00 | -0.34 | 6.35E-02 | 5.91E-01 |
| LAPTM4B      | -0.05 | 8.20E-01 | 1.00E+00 | -0.88 | 6.36E-02 | 5.91E-01 |
| AC112220.2   | 0.18  | 5.57E-01 | 1.00E+00 | 0.50  | 6.36E-02 | 5.91E-01 |
| NDUFAF8      | -0.34 | 1.10E-01 | 1.00E+00 | -0.60 | 6.36E-02 | 5.91E-01 |
| AC092140.2   | -2.28 | 3.16E-01 | 1.00E+00 | -2.10 | 6.37E-02 | 5.91E-01 |
| RANBP1       | -0.22 | 2.67E-01 | 1.00E+00 | -0.58 | 6.37E-02 | 5.91E-01 |
| TPI1         | -0.13 | 2.70E-01 | 1.00E+00 | 0.32  | 6.37E-02 | 5.91E-01 |
| HMCN1        | -0.15 | 6.86E-01 | 1.00E+00 | 1.17  | 6.37E-02 | 5.91E-01 |
| RPS10        | -1.93 | 3.78E-01 | 1.00E+00 | -1.16 | 6.37E-02 | 5.91E-01 |
| ZNF22        | 0.38  | 1.77E-01 | 1.00E+00 | -0.68 | 6.38E-02 | 5.91E-01 |
| TRAF3IP2-AS1 | 0.55  | 1.81E-01 | 1.00E+00 | -0.81 | 6.38E-02 | 5.91E-01 |
| LINC01235    | 0.55  | 5.78E-01 | 1.00E+00 | 1.06  | 6.38E-02 | 5.91E-01 |
| IL4R         | -0.25 | 4.62E-01 | 1.00E+00 | 1.27  | 6.39E-02 | 5.91E-01 |
| PLSCR2       | 0.68  | 7.24E-01 | 1.00E+00 | 1.84  | 6.39E-02 | 5.91E-01 |
| C1R          | 0.52  | 1.96E-01 | 1.00E+00 | 0.96  | 6.39E-02 | 5.91E-01 |
| CHST14       | 0.21  | 5.00E-01 | 1.00E+00 | 1.18  | 6.39E-02 | 5.91E-01 |
| STARD4-AS1   | -0.64 | 4.66E-01 | 1.00E+00 | 1.23  | 6.40E-02 | 5.91E-01 |
| CTSH         | -0.46 | 1.74E-01 | 1.00E+00 | 0.65  | 6.40E-02 | 5.91E-01 |
| DDX25        | -0.13 | 8.26E-01 | 1.00E+00 | -1.22 | 6.40E-02 | 5.91E-01 |
| ANKRD31      | 0.00  | 9.98E-01 | 1.00E+00 | 1.53  | 6.42E-02 | 5.93E-01 |
| RAB30-AS1    | -0.02 | 9.65E-01 | 1.00E+00 | -0.87 | 6.43E-02 | 5.93E-01 |
| APBA2        | -0.94 | 3.78E-02 | 1.00E+00 | 1.44  | 6.43E-02 | 5.93E-01 |
| TAPBPL       | -0.19 | 4.93E-01 | 1.00E+00 | 0.48  | 6.43E-02 | 5.93E-01 |



|                    |       |          |          |       |          |          |
|--------------------|-------|----------|----------|-------|----------|----------|
| <b>TTLL3</b>       | 0.52  | 2.61E-01 | 1.00E+00 | 0.74  | 6.44E-02 | 5.93E-01 |
| <b>NTSR1</b>       | -2.25 | 1.55E-02 | 7.76E-01 | 2.26  | 6.44E-02 | 5.93E-01 |
| <b>AL133243.3</b>  | -0.39 | 6.29E-01 | 1.00E+00 | 0.95  | 6.44E-02 | 5.93E-01 |
| <b>CHRFAM7A</b>    | 1.41  | 1.43E-01 | 1.00E+00 | 1.40  | 6.44E-02 | 5.93E-01 |
| <b>C3orf86</b>     | -2.36 | 3.95E-01 | 1.00E+00 | 2.01  | 6.45E-02 | 5.93E-01 |
| <b>HACD3</b>       | 0.16  | 5.58E-01 | 1.00E+00 | -0.40 | 6.45E-02 | 5.93E-01 |
| <b>AL360181.2</b>  | -2.03 | 1.89E-01 | 1.00E+00 | 1.83  | 6.45E-02 | 5.93E-01 |
| <b>AC125807.2</b>  | -0.30 | 3.95E-01 | 1.00E+00 | 1.34  | 6.45E-02 | 5.93E-01 |
| <b>XLOC_008935</b> | -0.18 | 8.31E-01 | 1.00E+00 | 1.77  | 6.45E-02 | 5.93E-01 |
| <b>PAXIP1-AS2</b>  | 0.04  | 9.27E-01 | 1.00E+00 | 0.48  | 6.45E-02 | 5.93E-01 |
| <b>XLOC_010389</b> | 2.47  | 4.68E-01 | 1.00E+00 | -2.81 | 6.45E-02 | 5.93E-01 |
| <b>EPM2A</b>       | 0.03  | 9.31E-01 | 1.00E+00 | -0.77 | 6.46E-02 | 5.93E-01 |
| <b>KIF5C</b>       | -1.26 | 4.09E-02 | 1.00E+00 | 1.16  | 6.46E-02 | 5.93E-01 |
| <b>THG1L</b>       | 0.06  | 8.22E-01 | 1.00E+00 | 0.53  | 6.47E-02 | 5.94E-01 |
| <b>AHRR</b>        | 0.11  | 7.79E-01 | 1.00E+00 | 1.28  | 6.47E-02 | 5.94E-01 |
| <b>RAB42</b>       | 0.46  | 4.34E-01 | 1.00E+00 | 1.39  | 6.47E-02 | 5.94E-01 |
| <b>AC099850.3</b>  | -0.37 | 6.00E-01 | 1.00E+00 | 1.69  | 6.48E-02 | 5.94E-01 |
| <b>NCKAP5</b>      | -0.23 | 2.63E-01 | 1.00E+00 | 0.58  | 6.48E-02 | 5.94E-01 |
| <b>CAHM</b>        | -1.24 | 1.66E-01 | 1.00E+00 | -1.50 | 6.49E-02 | 5.94E-01 |
| <b>MTCO2P2</b>     | -1.34 | 6.97E-01 | 1.00E+00 | -1.57 | 6.49E-02 | 5.94E-01 |
| <b>AL162586.1</b>  | -0.86 | 4.93E-01 | 1.00E+00 | 1.69  | 6.49E-02 | 5.94E-01 |
| <b>MIR3142HG</b>   | 0.32  | 8.52E-01 | 1.00E+00 | 1.98  | 6.50E-02 | 5.94E-01 |
| <b>KYAT1</b>       | -0.01 | 9.73E-01 | 1.00E+00 | -0.86 | 6.50E-02 | 5.94E-01 |
| <b>IFI44</b>       | -0.11 | 8.85E-01 | 1.00E+00 | 1.23  | 6.50E-02 | 5.94E-01 |
| <b>AL157996.1</b>  | 0.26  | 7.58E-01 | 1.00E+00 | -2.51 | 6.50E-02 | 5.94E-01 |
| <b>FAM227B</b>     | -0.15 | 5.84E-01 | 1.00E+00 | -0.75 | 6.50E-02 | 5.94E-01 |
| <b>AP000229.1</b>  | -2.47 | 9.29E-02 | 1.00E+00 | -1.78 | 6.50E-02 | 5.94E-01 |
| <b>IL1A</b>        | 0.15  | 8.61E-01 | 1.00E+00 | 1.89  | 6.51E-02 | 5.94E-01 |
| <b>FAM122A</b>     | -0.02 | 8.71E-01 | 1.00E+00 | -0.61 | 6.51E-02 | 5.94E-01 |
| <b>AC139495.3</b>  | -0.46 | 7.72E-01 | 1.00E+00 | 1.95  | 6.51E-02 | 5.94E-01 |
| <b>AL513283.1</b>  | -1.61 | 1.29E-02 | 7.15E-01 | -0.74 | 6.51E-02 | 5.94E-01 |
| <b>ST3GAL1</b>     | 0.30  | 5.75E-01 | 1.00E+00 | 0.89  | 6.52E-02 | 5.94E-01 |

|            |       |          |          |       |          |          |
|------------|-------|----------|----------|-------|----------|----------|
| ZNF812P    | 1.12  | 5.22E-01 | 1.00E+00 | 1.84  | 6.52E-02 | 5.94E-01 |
| GTF2A2     | 0.16  | 3.51E-01 | 1.00E+00 | -0.46 | 6.52E-02 | 5.94E-01 |
| CORO7      | -0.30 | 6.36E-01 | 1.00E+00 | 0.88  | 6.52E-02 | 5.94E-01 |
| MISP3      | -0.25 | 3.43E-01 | 1.00E+00 | -0.70 | 6.53E-02 | 5.95E-01 |
| PIM2       | -0.17 | 5.45E-01 | 1.00E+00 | 0.70  | 6.53E-02 | 5.95E-01 |
| UNC5B      | -0.52 | 2.31E-01 | 1.00E+00 | 0.89  | 6.54E-02 | 5.95E-01 |
| AC009318.1 | 1.00  | 1.67E-01 | 1.00E+00 | 1.56  | 6.54E-02 | 5.95E-01 |
| ACO1       | 0.66  | 2.63E-01 | 1.00E+00 | -0.93 | 6.54E-02 | 5.95E-01 |
| USP35      | -0.27 | 4.18E-01 | 1.00E+00 | 1.53  | 6.54E-02 | 5.95E-01 |
| ENPP4      | 0.38  | 5.17E-01 | 1.00E+00 | -0.79 | 6.54E-02 | 5.95E-01 |
| FAAH       | -0.12 | 6.56E-01 | 1.00E+00 | -1.04 | 6.55E-02 | 5.95E-01 |
| KIF16B     | -0.03 | 8.96E-01 | 1.00E+00 | -0.31 | 6.57E-02 | 5.96E-01 |
| SOD2       | 0.37  | 2.62E-01 | 1.00E+00 | 0.89  | 6.57E-02 | 5.96E-01 |
| APPL1      | -0.01 | 9.51E-01 | 1.00E+00 | -0.36 | 6.57E-02 | 5.96E-01 |
| KCTD12     | 0.30  | 4.29E-01 | 1.00E+00 | 0.90  | 6.58E-02 | 5.97E-01 |
| CSF2RB     | -0.30 | 4.84E-01 | 1.00E+00 | 1.48  | 6.58E-02 | 5.97E-01 |
| PRELID2P1  | 2.53  | 3.41E-01 | 1.00E+00 | -1.48 | 6.59E-02 | 5.97E-01 |
| CRYGN      | -2.22 | 2.54E-01 | 1.00E+00 | 2.71  | 6.59E-02 | 5.97E-01 |
| AC009407.1 | 0.17  | 9.12E-01 | 1.00E+00 | -2.21 | 6.59E-02 | 5.97E-01 |
| RPAP3      | -0.10 | 7.00E-01 | 1.00E+00 | -0.44 | 6.59E-02 | 5.97E-01 |
| TRABD2A    | 0.63  | 3.10E-01 | 1.00E+00 | 1.19  | 6.60E-02 | 5.97E-01 |
| TMPRSS4    | -2.01 | 1.11E-01 | 1.00E+00 | 1.40  | 6.60E-02 | 5.97E-01 |
| HTRA4      | -2.30 | 2.36E-01 | 1.00E+00 | 3.64  | 6.60E-02 | 5.97E-01 |
| AC093668.2 | -0.93 | 3.80E-01 | 1.00E+00 | 0.93  | 6.61E-02 | 5.97E-01 |
| AC000061.1 | -1.72 | 1.32E-01 | 1.00E+00 | -2.04 | 6.61E-02 | 5.97E-01 |
| SLC25A34   | 0.40  | 6.52E-01 | 1.00E+00 | -1.76 | 6.61E-02 | 5.97E-01 |
| MLIP       | -0.42 | 2.90E-01 | 1.00E+00 | -0.58 | 6.62E-02 | 5.97E-01 |
| GPN3       | 0.27  | 1.49E-01 | 1.00E+00 | -0.62 | 6.62E-02 | 5.98E-01 |
| CALN1      | -0.18 | 6.59E-01 | 1.00E+00 | -1.00 | 6.63E-02 | 5.98E-01 |
| SDHAP3     | 1.67  | 6.45E-04 | 1.20E-01 | 0.98  | 6.63E-02 | 5.98E-01 |
| CYTIP      | -0.33 | 5.35E-01 | 1.00E+00 | 0.92  | 6.63E-02 | 5.98E-01 |
| DOK2       | -0.02 | 9.61E-01 | 1.00E+00 | 1.17  | 6.64E-02 | 5.98E-01 |

|                   |       |          |          |       |          |          |
|-------------------|-------|----------|----------|-------|----------|----------|
| <b>AL390198.1</b> | 0.39  | 9.00E-01 | 1.00E+00 | -1.58 | 6.65E-02 | 5.98E-01 |
| ITGAE             | 0.20  | 4.61E-01 | 1.00E+00 | -0.83 | 6.65E-02 | 5.98E-01 |
| EIF2D             | -0.16 | 5.13E-01 | 1.00E+00 | -0.24 | 6.65E-02 | 5.98E-01 |
| <b>ZBTB20-AS1</b> | -0.80 | 8.18E-01 | 1.00E+00 | -2.34 | 6.65E-02 | 5.98E-01 |
| ROR2              | -0.35 | 2.84E-01 | 1.00E+00 | 1.07  | 6.65E-02 | 5.98E-01 |
| CRABP1            | -1.29 | 9.52E-03 | 6.06E-01 | -1.46 | 6.65E-02 | 5.98E-01 |
| MRPS35            | 0.03  | 8.42E-01 | 1.00E+00 | -0.34 | 6.66E-02 | 5.98E-01 |
| G5386             | -1.33 | 1.03E-01 | 1.00E+00 | 0.89  | 6.66E-02 | 5.98E-01 |
| <b>AC008906.1</b> | -2.59 | 1.02E-01 | 1.00E+00 | 1.38  | 6.66E-02 | 5.98E-01 |
| STAG3L4           | 0.41  | 4.49E-01 | 1.00E+00 | -0.66 | 6.67E-02 | 5.98E-01 |
| COMMD7            | 0.20  | 3.78E-01 | 1.00E+00 | -0.67 | 6.67E-02 | 5.98E-01 |
| XPNPEP1           | 0.05  | 7.81E-01 | 1.00E+00 | 0.28  | 6.67E-02 | 5.98E-01 |
| TSPAN13           | 0.50  | 1.84E-01 | 1.00E+00 | -0.60 | 6.67E-02 | 5.98E-01 |
| <b>AC005884.2</b> | NA    | NA       | NA       | -2.25 | 6.67E-02 | 5.98E-01 |
| THPO              | -0.23 | 8.23E-01 | 1.00E+00 | 1.91  | 6.67E-02 | 5.98E-01 |
| TMEM169           | -0.31 | 5.46E-01 | 1.00E+00 | 1.91  | 6.68E-02 | 5.99E-01 |
| SLC29A3           | 0.06  | 8.73E-01 | 1.00E+00 | 0.92  | 6.70E-02 | 5.99E-01 |
| RAB6B             | -0.26 | 7.12E-01 | 1.00E+00 | 0.80  | 6.70E-02 | 5.99E-01 |
| LRRC57            | 0.14  | 5.37E-01 | 1.00E+00 | -0.53 | 6.70E-02 | 5.99E-01 |
| B3GNT3            | -0.09 | 8.91E-01 | 1.00E+00 | 1.49  | 6.70E-02 | 5.99E-01 |
| SLA               | -0.21 | 6.57E-01 | 1.00E+00 | 1.12  | 6.70E-02 | 5.99E-01 |
| <b>AL359504.2</b> | 1.54  | 5.51E-01 | 1.00E+00 | -2.09 | 6.71E-02 | 5.99E-01 |
| CACNA1B           | -0.29 | 9.07E-01 | 1.00E+00 | 2.18  | 6.71E-02 | 5.99E-01 |
| C22orf39          | 0.23  | 4.16E-01 | 1.00E+00 | -0.59 | 6.71E-02 | 5.99E-01 |
| LINC02577         | -0.58 | 8.67E-01 | 1.00E+00 | 3.06  | 6.71E-02 | 5.99E-01 |
| IKZF2             | 0.05  | 9.23E-01 | 1.00E+00 | -0.88 | 6.72E-02 | 5.99E-01 |
| <b>AL356968.2</b> | NA    | NA       | NA       | -1.75 | 6.72E-02 | 5.99E-01 |
| AREGB             | -1.52 | 6.60E-01 | 1.00E+00 | 2.20  | 6.72E-02 | 5.99E-01 |
| CFAP221           | -0.30 | 7.56E-01 | 1.00E+00 | -1.70 | 6.73E-02 | 5.99E-01 |
| BAX               | -0.25 | 3.07E-01 | 1.00E+00 | 0.87  | 6.73E-02 | 5.99E-01 |
| GOT2              | -0.18 | 2.39E-01 | 1.00E+00 | -0.28 | 6.73E-02 | 5.99E-01 |
| KPRP              | 0.28  | 6.85E-01 | 1.00E+00 | 1.46  | 6.73E-02 | 5.99E-01 |

|                   |       |          |          |       |          |          |
|-------------------|-------|----------|----------|-------|----------|----------|
| <b>HBG2</b>       | 0.00  | 1.00E+00 | NA       | 2.31  | 6.74E-02 | 5.99E-01 |
| <b>AC060766.4</b> | -0.53 | 6.34E-01 | 1.00E+00 | 1.58  | 6.74E-02 | 5.99E-01 |
| <b>RIT1</b>       | 0.13  | 5.46E-01 | 1.00E+00 | 0.45  | 6.75E-02 | 5.99E-01 |
| <b>FADS1</b>      | 1.01  | 1.60E-01 | 1.00E+00 | -1.19 | 6.76E-02 | 5.99E-01 |
| <b>FLJ42351</b>   | -0.96 | 7.61E-01 | 1.00E+00 | 2.47  | 6.77E-02 | 5.99E-01 |
| <b>LINC00345</b>  | 1.42  | 4.53E-01 | 1.00E+00 | 2.05  | 6.77E-02 | 5.99E-01 |
| <b>IMPACT</b>     | -0.08 | 6.56E-01 | 1.00E+00 | -0.40 | 6.77E-02 | 5.99E-01 |
| <b>NOL12</b>      | 0.72  | 4.91E-01 | 1.00E+00 | 0.76  | 6.77E-02 | 5.99E-01 |
| <b>ECI2</b>       | 0.21  | 5.75E-01 | 1.00E+00 | -0.78 | 6.77E-02 | 5.99E-01 |
| <b>CCDC88A</b>    | -0.25 | 5.05E-01 | 1.00E+00 | 0.71  | 6.78E-02 | 5.99E-01 |
| <b>MPO</b>        | 0.18  | 8.88E-01 | 1.00E+00 | 1.94  | 6.78E-02 | 5.99E-01 |
| <b>TMCC1</b>      | 0.02  | 9.37E-01 | 1.00E+00 | 0.32  | 6.78E-02 | 5.99E-01 |
| <b>ACTR1B</b>     | 0.09  | 6.33E-01 | 1.00E+00 | 0.53  | 6.78E-02 | 5.99E-01 |
| <b>SDC3</b>       | -0.17 | 6.31E-01 | 1.00E+00 | 1.42  | 6.78E-02 | 5.99E-01 |
| <b>GALR1</b>      | 1.68  | 1.00E-01 | 1.00E+00 | -2.18 | 6.78E-02 | 5.99E-01 |
| <b>SIRT6</b>      | -0.15 | 5.26E-01 | 1.00E+00 | 1.11  | 6.78E-02 | 5.99E-01 |
| <b>PBX2</b>       | -0.17 | 5.40E-01 | 1.00E+00 | 1.30  | 6.79E-02 | 5.99E-01 |
| <b>PDCD4</b>      | -0.21 | 4.02E-01 | 1.00E+00 | -0.53 | 6.79E-02 | 5.99E-01 |
| <b>PEX11A</b>     | 0.67  | 1.23E-01 | 1.00E+00 | -0.89 | 6.79E-02 | 5.99E-01 |
| <b>IGLV1-36</b>   | 2.17  | 3.93E-01 | 1.00E+00 | 4.37  | 6.79E-02 | 5.99E-01 |
| <b>SMIM25</b>     | 0.21  | 7.56E-01 | 1.00E+00 | 1.27  | 6.80E-02 | 5.99E-01 |
| <b>BTN3A2</b>     | -0.09 | 8.53E-01 | 1.00E+00 | 0.90  | 6.80E-02 | 5.99E-01 |
| <b>HSPA1A</b>     | 0.06  | 8.04E-01 | 1.00E+00 | -0.72 | 6.80E-02 | 5.99E-01 |
| <b>REEP5</b>      | 0.12  | 4.20E-01 | 1.00E+00 | -0.42 | 6.80E-02 | 5.99E-01 |
| <b>CHI3L2</b>     | 0.19  | 8.29E-01 | 1.00E+00 | 1.17  | 6.80E-02 | 5.99E-01 |
| <b>PRKCQ</b>      | 0.06  | 9.30E-01 | 1.00E+00 | 2.25  | 6.80E-02 | 5.99E-01 |
| <b>MEX3B</b>      | 0.20  | 6.76E-01 | 1.00E+00 | 1.65  | 6.80E-02 | 5.99E-01 |
| <b>RPSAP52</b>    | 0.05  | 9.89E-01 | 1.00E+00 | 2.73  | 6.81E-02 | 5.99E-01 |
| <b>CDK11B</b>     | -0.12 | 6.00E-01 | 1.00E+00 | 0.82  | 6.81E-02 | 5.99E-01 |
| <b>PSME4</b>      | 0.06  | 7.62E-01 | 1.00E+00 | 0.72  | 6.81E-02 | 5.99E-01 |
| <b>IL11</b>       | 1.18  | 3.49E-01 | 1.00E+00 | 2.32  | 6.81E-02 | 5.99E-01 |
| <b>DBI</b>        | 0.26  | 2.64E-01 | 1.00E+00 | -0.72 | 6.81E-02 | 5.99E-01 |

|                   |       |          |          |       |          |          |
|-------------------|-------|----------|----------|-------|----------|----------|
| <b>AC090559.1</b> | -0.56 | 2.23E-01 | 1.00E+00 | 1.09  | 6.81E-02 | 5.99E-01 |
| <b>TNIK</b>       | -0.24 | 5.02E-01 | 1.00E+00 | 1.40  | 6.82E-02 | 5.99E-01 |
| <b>GMPR</b>       | 0.22  | 5.96E-01 | 1.00E+00 | 0.76  | 6.82E-02 | 5.99E-01 |
| <b>ITGB2-AS1</b>  | -2.17 | 3.50E-02 | 1.00E+00 | 1.25  | 6.82E-02 | 5.99E-01 |
| <b>HACD2</b>      | 0.41  | 1.57E-01 | 1.00E+00 | -0.77 | 6.82E-02 | 5.99E-01 |
| <b>FOXO1</b>      | 0.02  | 9.41E-01 | 1.00E+00 | -0.74 | 6.82E-02 | 5.99E-01 |
| <b>G23007</b>     | -1.31 | 2.23E-01 | 1.00E+00 | -2.62 | 6.83E-02 | 5.99E-01 |
| <b>NCKAP1L</b>    | 0.08  | 8.72E-01 | 1.00E+00 | 1.19  | 6.83E-02 | 5.99E-01 |
| <b>DPF1</b>       | -2.05 | 8.84E-04 | 1.50E-01 | 1.63  | 6.83E-02 | 5.99E-01 |
| <b>XKR8</b>       | 0.03  | 9.07E-01 | 1.00E+00 | 0.64  | 6.83E-02 | 5.99E-01 |
| <b>AC012615.6</b> | -0.94 | 3.90E-01 | 1.00E+00 | 3.43  | 6.84E-02 | 5.99E-01 |
| <b>TLCD1</b>      | -0.37 | 4.11E-01 | 1.00E+00 | -1.00 | 6.84E-02 | 5.99E-01 |
| <b>IGHV2-26</b>   | 3.55  | 2.90E-01 | 1.00E+00 | 3.76  | 6.84E-02 | 5.99E-01 |
| <b>ZNF740</b>     | 0.51  | 9.62E-02 | 1.00E+00 | 1.17  | 6.84E-02 | 5.99E-01 |
| <b>TRAF3IP3</b>   | -0.71 | 2.50E-01 | 1.00E+00 | 1.35  | 6.84E-02 | 5.99E-01 |
| <b>AC005343.1</b> | 2.75  | 3.77E-01 | 1.00E+00 | -1.79 | 6.85E-02 | 5.99E-01 |
| <b>C4orf48</b>    | -0.34 | 4.45E-01 | 1.00E+00 | 0.64  | 6.85E-02 | 5.99E-01 |
| <b>ZNF284</b>     | 0.32  | 7.16E-01 | 1.00E+00 | -0.96 | 6.85E-02 | 5.99E-01 |
| <b>TNFRSF14</b>   | -0.14 | 6.44E-01 | 1.00E+00 | 1.02  | 6.85E-02 | 5.99E-01 |
| <b>AC104232.2</b> | NA    | NA       | NA       | -3.78 | 6.85E-02 | 5.99E-01 |
| <b>CLUL1</b>      | -1.33 | 1.16E-01 | 1.00E+00 | -1.85 | 6.86E-02 | 5.99E-01 |
| <b>EIF1AX</b>     | 0.16  | 5.42E-01 | 1.00E+00 | -0.32 | 6.86E-02 | 5.99E-01 |
| <b>SLC2A1-AS1</b> | -0.12 | 8.90E-01 | 1.00E+00 | -1.06 | 6.86E-02 | 5.99E-01 |
| <b>DTX3L</b>      | 0.16  | 7.58E-01 | 1.00E+00 | 0.80  | 6.86E-02 | 5.99E-01 |
| <b>SCAND1</b>     | -0.12 | 6.89E-01 | 1.00E+00 | 0.40  | 6.87E-02 | 5.99E-01 |
| <b>CCL3</b>       | -0.59 | 8.28E-01 | 1.00E+00 | 1.79  | 6.88E-02 | 6.00E-01 |
| <b>RNF219</b>     | 0.21  | 5.18E-01 | 1.00E+00 | -0.48 | 6.88E-02 | 6.00E-01 |
| <b>NEURL1B</b>    | 0.30  | 2.29E-01 | 1.00E+00 | 0.88  | 6.89E-02 | 6.00E-01 |
| <b>LINC01532</b>  | 2.53  | 4.50E-01 | 1.00E+00 | -4.11 | 6.90E-02 | 6.00E-01 |
| <b>ACYP2</b>      | -0.04 | 9.09E-01 | 1.00E+00 | -0.69 | 6.90E-02 | 6.00E-01 |
| <b>ADGRE4P</b>    | -1.74 | 5.16E-01 | 1.00E+00 | 3.21  | 6.90E-02 | 6.00E-01 |
| <b>KIFC3</b>      | -0.26 | 2.94E-01 | 1.00E+00 | 0.64  | 6.90E-02 | 6.00E-01 |

|                       |       |          |          |       |          |          |
|-----------------------|-------|----------|----------|-------|----------|----------|
| <b>GTF2H5</b>         | 0.27  | 2.67E-01 | 1.00E+00 | -0.52 | 6.90E-02 | 6.00E-01 |
| <b>BIN3</b>           | -0.10 | 6.45E-01 | 1.00E+00 | 0.38  | 6.91E-02 | 6.00E-01 |
| <b>TGFB3</b>          | -0.29 | 5.57E-01 | 1.00E+00 | 0.82  | 6.91E-02 | 6.00E-01 |
| <b>ARMCX5-GPRASP2</b> | 0.11  | 7.95E-01 | 1.00E+00 | -0.69 | 6.91E-02 | 6.00E-01 |
| <b>GPR182</b>         | 0.52  | 5.63E-01 | 1.00E+00 | -2.21 | 6.92E-02 | 6.00E-01 |
| <b>PIGG</b>           | -0.22 | 2.60E-01 | 1.00E+00 | 0.36  | 6.92E-02 | 6.00E-01 |
| <b>LINC02325</b>      | -0.45 | 8.08E-01 | 1.00E+00 | 2.28  | 6.92E-02 | 6.00E-01 |
| <b>EVA1A</b>          | -0.26 | 6.80E-01 | 1.00E+00 | 0.76  | 6.92E-02 | 6.00E-01 |
| <b>C2orf81</b>        | 0.64  | 4.71E-01 | 1.00E+00 | 0.84  | 6.92E-02 | 6.00E-01 |
| <b>ALKAL2</b>         | 0.59  | 3.58E-01 | 1.00E+00 | -1.43 | 6.92E-02 | 6.00E-01 |
| <b>GRAMD1A</b>        | -0.24 | 4.76E-01 | 1.00E+00 | 1.22  | 6.92E-02 | 6.00E-01 |
| <b>MRPS30-DT</b>      | 0.41  | 4.19E-01 | 1.00E+00 | -1.07 | 6.93E-02 | 6.00E-01 |
| <b>DPP8</b>           | 0.00  | 9.93E-01 | 1.00E+00 | -0.33 | 6.93E-02 | 6.00E-01 |
| <b>HK3</b>            | 0.39  | 6.12E-01 | 1.00E+00 | 2.14  | 6.93E-02 | 6.00E-01 |
| <b>PRRC2A</b>         | -0.38 | 1.01E-01 | 1.00E+00 | 1.34  | 6.93E-02 | 6.00E-01 |
| <b>CCL7</b>           | 3.99  | 1.97E-01 | 1.00E+00 | 3.19  | 6.94E-02 | 6.00E-01 |
| <b>RP11-439A17.9</b>  | -0.62 | 4.08E-01 | 1.00E+00 | 1.95  | 6.94E-02 | 6.00E-01 |
| <b>VKORC1L1</b>       | 0.91  | 4.25E-02 | 1.00E+00 | -0.72 | 6.94E-02 | 6.00E-01 |
| <b>NEBL</b>           | -0.08 | 7.50E-01 | 1.00E+00 | -0.72 | 6.95E-02 | 6.00E-01 |
| <b>AXL</b>            | 0.44  | 2.87E-01 | 1.00E+00 | 0.70  | 6.95E-02 | 6.00E-01 |
| <b>AC023024.2</b>     | 1.01  | 3.25E-01 | 1.00E+00 | 2.10  | 6.95E-02 | 6.00E-01 |
| <b>CD226</b>          | 0.08  | 9.07E-01 | 1.00E+00 | 1.86  | 6.96E-02 | 6.00E-01 |
| <b>AC106738.1</b>     | 0.90  | 4.77E-01 | 1.00E+00 | -1.43 | 6.96E-02 | 6.00E-01 |
| <b>CWF19L2</b>        | 0.41  | 1.16E-01 | 1.00E+00 | 0.42  | 6.96E-02 | 6.00E-01 |
| <b>TMED9</b>          | -0.05 | 7.80E-01 | 1.00E+00 | 0.59  | 6.96E-02 | 6.00E-01 |
| <b>EIF4A1</b>         | 0.51  | 6.37E-01 | 1.00E+00 | 0.89  | 6.96E-02 | 6.00E-01 |
| <b>CLEC4D</b>         | 3.27  | 3.32E-01 | 1.00E+00 | 2.60  | 6.96E-02 | 6.00E-01 |
| <b>P2RX4</b>          | -0.05 | 8.68E-01 | 1.00E+00 | 0.64  | 6.97E-02 | 6.01E-01 |
| <b>WBP1L</b>          | 0.32  | 1.48E-01 | 1.00E+00 | 0.50  | 6.98E-02 | 6.01E-01 |
| <b>PDCD2</b>          | -0.11 | 5.31E-01 | 1.00E+00 | -0.56 | 6.98E-02 | 6.01E-01 |
| <b>G25988</b>         | -2.54 | 1.89E-01 | 1.00E+00 | 2.20  | 6.98E-02 | 6.01E-01 |
| <b>CAPZB</b>          | -0.11 | 4.43E-01 | 1.00E+00 | 0.33  | 6.98E-02 | 6.01E-01 |

|             |       |          |          |       |          |          |
|-------------|-------|----------|----------|-------|----------|----------|
| WRB         | 0.46  | 1.95E-01 | 1.00E+00 | -0.90 | 6.99E-02 | 6.01E-01 |
| SNHG25      | -1.43 | 3.50E-01 | 1.00E+00 | -1.10 | 6.99E-02 | 6.01E-01 |
| CCDC86      | -0.21 | 5.17E-01 | 1.00E+00 | 0.45  | 6.99E-02 | 6.01E-01 |
| TSHZ3       | -0.33 | 3.82E-01 | 1.00E+00 | 1.15  | 7.00E-02 | 6.01E-01 |
| AC079298.3  | 0.16  | 9.12E-01 | 1.00E+00 | -1.73 | 7.00E-02 | 6.01E-01 |
| JPT1        | -0.20 | 5.37E-01 | 1.00E+00 | 0.40  | 7.00E-02 | 6.01E-01 |
| AC106882.1  | -0.64 | 8.54E-01 | 1.00E+00 | -3.03 | 7.01E-02 | 6.01E-01 |
| CD47        | 0.17  | 5.09E-01 | 1.00E+00 | 0.36  | 7.01E-02 | 6.01E-01 |
| AP000356.1  | 0.08  | 9.35E-01 | 1.00E+00 | 1.34  | 7.01E-02 | 6.01E-01 |
| NR1H2       | -0.01 | 9.50E-01 | 1.00E+00 | 0.40  | 7.02E-02 | 6.02E-01 |
| BCYRN1      | -0.03 | 9.75E-01 | 1.00E+00 | 1.36  | 7.03E-02 | 6.02E-01 |
| NR2E1       | -4.07 | 3.22E-02 | 1.00E+00 | -2.48 | 7.04E-02 | 6.03E-01 |
| AP001062.1  | -0.03 | 9.72E-01 | 1.00E+00 | -0.98 | 7.04E-02 | 6.04E-01 |
| XLOC_000974 | -2.17 | 9.27E-02 | 1.00E+00 | -2.34 | 7.05E-02 | 6.04E-01 |
| ADAM32      | 0.42  | 5.87E-01 | 1.00E+00 | -1.70 | 7.06E-02 | 6.04E-01 |
| SIGLEC17P   | 0.28  | 6.90E-01 | 1.00E+00 | 1.27  | 7.06E-02 | 6.04E-01 |
| AC239804.1  | 0.31  | 8.20E-01 | 1.00E+00 | 1.91  | 7.06E-02 | 6.04E-01 |
| TNC         | -1.19 | 1.60E-02 | 7.93E-01 | 1.25  | 7.06E-02 | 6.04E-01 |
| ATP5PF      | 0.18  | 4.39E-01 | 1.00E+00 | -0.99 | 7.07E-02 | 6.04E-01 |
| DNAJC5B     | -0.93 | 7.87E-01 | 1.00E+00 | 2.79  | 7.07E-02 | 6.04E-01 |
| CERS3-AS1   | -0.78 | 1.21E-01 | 1.00E+00 | -0.82 | 7.07E-02 | 6.04E-01 |
| SLC39A11    | 0.05  | 8.13E-01 | 1.00E+00 | 0.38  | 7.08E-02 | 6.05E-01 |
| AC097534.2  | 0.18  | 6.88E-01 | 1.00E+00 | -0.77 | 7.08E-02 | 6.05E-01 |
| SLC26A4-AS1 | -2.87 | 1.52E-01 | 1.00E+00 | 2.70  | 7.09E-02 | 6.05E-01 |
| ZNF85       | 0.19  | 5.71E-01 | 1.00E+00 | -0.60 | 7.09E-02 | 6.05E-01 |
| RAB20       | -0.01 | 9.83E-01 | 1.00E+00 | 1.26  | 7.09E-02 | 6.05E-01 |
| AC073332.1  | -1.04 | 3.31E-01 | 1.00E+00 | -0.98 | 7.11E-02 | 6.06E-01 |
| TRBV24-1    | 0.26  | 9.39E-01 | 1.00E+00 | 1.95  | 7.11E-02 | 6.06E-01 |
| RPS24P8     | -0.58 | 7.95E-01 | 1.00E+00 | -0.98 | 7.11E-02 | 6.06E-01 |
| ANPEP       | 0.15  | 6.68E-01 | 1.00E+00 | 1.20  | 7.11E-02 | 6.06E-01 |
| TRBV6-5     | -2.95 | 3.84E-02 | 1.00E+00 | 1.97  | 7.12E-02 | 6.06E-01 |
| AL135791.1  | 1.27  | 2.60E-01 | 1.00E+00 | -2.06 | 7.12E-02 | 6.06E-01 |

|             |       |          |          |       |          |          |
|-------------|-------|----------|----------|-------|----------|----------|
| URI1        | 0.11  | 5.56E-01 | 1.00E+00 | -0.57 | 7.12E-02 | 6.06E-01 |
| XLOC_005552 | -0.61 | 5.96E-01 | 1.00E+00 | 2.05  | 7.13E-02 | 6.06E-01 |
| HMOX2       | -0.26 | 1.44E-01 | 1.00E+00 | 0.28  | 7.14E-02 | 6.06E-01 |
| ASPH        | 0.72  | 1.56E-01 | 1.00E+00 | -0.79 | 7.14E-02 | 6.06E-01 |
| DNAJB14     | 0.05  | 8.62E-01 | 1.00E+00 | -0.32 | 7.14E-02 | 6.06E-01 |
| PRADC1      | -0.06 | 7.85E-01 | 1.00E+00 | -0.54 | 7.14E-02 | 6.06E-01 |
| CTSC        | -0.27 | 4.35E-01 | 1.00E+00 | 0.74  | 7.14E-02 | 6.06E-01 |
| XLOC_003221 | -0.27 | 6.17E-01 | 1.00E+00 | -1.48 | 7.14E-02 | 6.06E-01 |
| SLC12A5     | -0.80 | 8.09E-01 | 1.00E+00 | 1.66  | 7.14E-02 | 6.06E-01 |
| CDC73       | 0.12  | 5.71E-01 | 1.00E+00 | -0.38 | 7.15E-02 | 6.06E-01 |
| AL139125.2  | -0.49 | 8.43E-01 | 1.00E+00 | 3.02  | 7.15E-02 | 6.06E-01 |
| CHD3        | -0.11 | 7.38E-01 | 1.00E+00 | 1.04  | 7.15E-02 | 6.06E-01 |
| QDPR        | 0.53  | 2.58E-01 | 1.00E+00 | -0.60 | 7.16E-02 | 6.06E-01 |
| 8-Sep       | 0.01  | 9.87E-01 | 1.00E+00 | 0.62  | 7.16E-02 | 6.06E-01 |
| ZNF791      | 0.18  | 3.47E-01 | 1.00E+00 | -0.29 | 7.16E-02 | 6.06E-01 |
| AL133346.1  | -2.73 | 4.13E-02 | 1.00E+00 | -1.76 | 7.17E-02 | 6.06E-01 |
| C1S         | 0.53  | 2.07E-01 | 1.00E+00 | 0.92  | 7.17E-02 | 6.06E-01 |
| XAB2        | 0.02  | 8.93E-01 | 1.00E+00 | 0.61  | 7.17E-02 | 6.06E-01 |
| PRKCSH      | -0.18 | 4.53E-01 | 1.00E+00 | 0.69  | 7.17E-02 | 6.07E-01 |
| RNU2-6P     | NA    | NA       | NA       | -1.61 | 7.18E-02 | 6.07E-01 |
| HLA-C       | 0.02  | 9.53E-01 | 1.00E+00 | 0.73  | 7.18E-02 | 6.07E-01 |
| RGN         | 0.80  | 1.86E-01 | 1.00E+00 | -1.01 | 7.19E-02 | 6.07E-01 |
| AC064836.3  | -0.09 | 7.83E-01 | 1.00E+00 | -0.90 | 7.19E-02 | 6.07E-01 |
| PI4KAP1     | 0.28  | 6.52E-01 | 1.00E+00 | 1.31  | 7.20E-02 | 6.07E-01 |
| PCGF2       | -0.40 | 2.19E-01 | 1.00E+00 | 1.25  | 7.20E-02 | 6.07E-01 |
| AGAP14P     | 0.56  | 8.71E-01 | 1.00E+00 | -2.39 | 7.20E-02 | 6.07E-01 |
| IMMP1L      | 0.41  | 1.37E-01 | 1.00E+00 | -0.67 | 7.20E-02 | 6.07E-01 |
| MKMK1-AS1   | 0.09  | 9.76E-01 | 1.00E+00 | -2.72 | 7.21E-02 | 6.07E-01 |
| BTN2A3P     | -0.37 | 6.20E-01 | 1.00E+00 | 0.95  | 7.21E-02 | 6.07E-01 |
| CLSTN3      | -0.22 | 5.61E-01 | 1.00E+00 | 0.94  | 7.21E-02 | 6.07E-01 |
| NHEG1       | 0.31  | 7.16E-01 | 1.00E+00 | -1.67 | 7.21E-02 | 6.07E-01 |
| CYP2F2P     | 0.23  | 8.56E-01 | 1.00E+00 | -1.10 | 7.21E-02 | 6.07E-01 |



|                  |       |          |          |       |          |          |
|------------------|-------|----------|----------|-------|----------|----------|
| STRAP            | 0.08  | 5.93E-01 | 1.00E+00 | -0.31 | 7.22E-02 | 6.07E-01 |
| MBLAC2           | -0.12 | 5.74E-01 | 1.00E+00 | -0.58 | 7.22E-02 | 6.07E-01 |
| AC011591.2       | -5.88 | 2.41E-02 | 9.18E-01 | -1.68 | 7.22E-02 | 6.07E-01 |
| LGR4             | 0.02  | 9.16E-01 | 1.00E+00 | -0.69 | 7.22E-02 | 6.07E-01 |
| GALE             | 0.02  | 9.30E-01 | 1.00E+00 | 0.37  | 7.22E-02 | 6.07E-01 |
| GPR132           | 0.10  | 8.63E-01 | 1.00E+00 | 1.55  | 7.22E-02 | 6.07E-01 |
| AL442663.3       | -0.63 | 7.52E-01 | 1.00E+00 | 1.65  | 7.24E-02 | 6.07E-01 |
| KCNJ16           | 1.18  | 4.32E-01 | 1.00E+00 | -1.42 | 7.24E-02 | 6.07E-01 |
| AL590068.3       | 0.36  | 9.17E-01 | 1.00E+00 | 3.80  | 7.24E-02 | 6.07E-01 |
| RAB40A           | -0.24 | 9.19E-01 | 1.00E+00 | 2.11  | 7.24E-02 | 6.07E-01 |
| AP1AR            | 0.21  | 4.78E-01 | 1.00E+00 | -0.87 | 7.24E-02 | 6.07E-01 |
| AC010343.3       | -4.04 | 1.74E-01 | 1.00E+00 | -1.77 | 7.25E-02 | 6.07E-01 |
| LDHAP7           | -0.99 | 7.23E-01 | 1.00E+00 | -1.42 | 7.25E-02 | 6.07E-01 |
| UBA5             | 0.09  | 6.13E-01 | 1.00E+00 | -0.69 | 7.25E-02 | 6.07E-01 |
| MVD              | -0.18 | 7.38E-01 | 1.00E+00 | -0.56 | 7.25E-02 | 6.07E-01 |
| TRAV1-2          | -0.83 | 8.06E-01 | 1.00E+00 | 2.56  | 7.26E-02 | 6.08E-01 |
| KDELC1           | 0.03  | 9.35E-01 | 1.00E+00 | 0.89  | 7.26E-02 | 6.08E-01 |
| APOM             | -0.41 | 4.44E-01 | 1.00E+00 | -0.78 | 7.27E-02 | 6.08E-01 |
| ARMC8            | 0.24  | 2.38E-01 | 1.00E+00 | -0.41 | 7.27E-02 | 6.08E-01 |
| ATP5F1C          | -0.06 | 6.89E-01 | 1.00E+00 | -0.57 | 7.27E-02 | 6.08E-01 |
| PDXDC2P-NPIP814P | -0.52 | 7.67E-01 | 1.00E+00 | 1.57  | 7.27E-02 | 6.08E-01 |
| XLOC_005448      | -1.14 | 6.30E-01 | 1.00E+00 | -2.07 | 7.27E-02 | 6.08E-01 |
| SH3BP5           | 0.35  | 4.83E-01 | 1.00E+00 | 1.13  | 7.27E-02 | 6.08E-01 |
| ECHDC1           | 0.28  | 3.98E-01 | 1.00E+00 | -0.70 | 7.28E-02 | 6.08E-01 |
| ZNF25            | 0.30  | 3.19E-01 | 1.00E+00 | -0.53 | 7.29E-02 | 6.08E-01 |
| AC011465.1       | -0.58 | 8.67E-01 | 1.00E+00 | -2.81 | 7.29E-02 | 6.08E-01 |
| ZNF512           | 0.08  | 8.42E-01 | 1.00E+00 | -0.57 | 7.30E-02 | 6.08E-01 |
| RHOG             | -0.10 | 6.21E-01 | 1.00E+00 | 0.60  | 7.30E-02 | 6.08E-01 |
| MACROD1          | 0.21  | 3.63E-01 | 1.00E+00 | -0.92 | 7.30E-02 | 6.08E-01 |
| UBR3             | 0.08  | 7.25E-01 | 1.00E+00 | -0.50 | 7.31E-02 | 6.09E-01 |
| ENAH             | -0.40 | 8.18E-02 | 1.00E+00 | 0.48  | 7.31E-02 | 6.09E-01 |
| CACYBP           | 0.08  | 6.73E-01 | 1.00E+00 | -0.58 | 7.31E-02 | 6.09E-01 |

|                    |       |          |          |       |          |          |
|--------------------|-------|----------|----------|-------|----------|----------|
| <b>DIRC2</b>       | 0.01  | 9.85E-01 | 1.00E+00 | -0.83 | 7.32E-02 | 6.09E-01 |
| <b>AC106795.2</b>  | 0.08  | 9.44E-01 | 1.00E+00 | -1.20 | 7.32E-02 | 6.09E-01 |
| <b>AJAP1</b>       | -0.58 | 2.95E-01 | 1.00E+00 | 1.56  | 7.32E-02 | 6.09E-01 |
| <b>SCN9A</b>       | 0.14  | 7.73E-01 | 1.00E+00 | -0.79 | 7.32E-02 | 6.09E-01 |
| <b>AC026362.2</b>  | -1.45 | 3.38E-01 | 1.00E+00 | -1.83 | 7.32E-02 | 6.09E-01 |
| <b>CDC37L1-DT</b>  | 0.19  | 8.56E-01 | 1.00E+00 | -1.17 | 7.32E-02 | 6.09E-01 |
| <b>PSAP</b>        | 0.27  | 2.91E-01 | 1.00E+00 | 0.53  | 7.33E-02 | 6.09E-01 |
| <b>XLOC_004229</b> | -0.28 | 6.80E-01 | 1.00E+00 | -0.93 | 7.34E-02 | 6.09E-01 |
| <b>NABP2</b>       | -0.35 | 3.72E-02 | 1.00E+00 | 0.58  | 7.34E-02 | 6.09E-01 |
| <b>TATDN3</b>      | 0.11  | 6.61E-01 | 1.00E+00 | -0.50 | 7.35E-02 | 6.09E-01 |
| <b>AC015819.2</b>  | -0.30 | 9.19E-01 | 1.00E+00 | 2.03  | 7.35E-02 | 6.09E-01 |
| <b>BYSL</b>        | -0.34 | 1.08E-01 | 1.00E+00 | 0.53  | 7.35E-02 | 6.10E-01 |
| <b>IL36G</b>       | -0.12 | 8.62E-01 | 1.00E+00 | 1.43  | 7.36E-02 | 6.10E-01 |
| <b>CALM2</b>       | 0.23  | 2.45E-01 | 1.00E+00 | -0.76 | 7.36E-02 | 6.10E-01 |
| <b>STK33</b>       | -2.52 | 7.61E-02 | 1.00E+00 | -2.20 | 7.36E-02 | 6.10E-01 |
| <b>ERCC8</b>       | 0.19  | 5.00E-01 | 1.00E+00 | -0.57 | 7.37E-02 | 6.10E-01 |
| <b>CNDP1</b>       | -2.05 | 5.35E-01 | 1.00E+00 | -2.18 | 7.37E-02 | 6.10E-01 |
| <b>AL451085.2</b>  | -2.29 | 2.70E-01 | 1.00E+00 | -1.93 | 7.37E-02 | 6.10E-01 |
| <b>RIMS3</b>       | 0.09  | 8.87E-01 | 1.00E+00 | 0.87  | 7.38E-02 | 6.10E-01 |
| <b>RNF25</b>       | -0.05 | 8.40E-01 | 1.00E+00 | 0.42  | 7.38E-02 | 6.10E-01 |
| <b>RTRAF</b>       | -0.01 | 9.73E-01 | 1.00E+00 | -0.36 | 7.38E-02 | 6.10E-01 |
| <b>SRD5A2</b>      | 2.43  | 8.72E-02 | 1.00E+00 | 2.95  | 7.39E-02 | 6.10E-01 |
| <b>AP003352.1</b>  | 2.02  | 2.15E-02 | 8.94E-01 | -1.05 | 7.39E-02 | 6.10E-01 |
| <b>CCL20</b>       | -3.31 | 2.39E-02 | 9.18E-01 | 1.87  | 7.39E-02 | 6.10E-01 |
| <b>DHRS9</b>       | -0.26 | 6.41E-01 | 1.00E+00 | 0.83  | 7.39E-02 | 6.10E-01 |
| <b>AP005482.1</b>  | -0.39 | 8.65E-01 | 1.00E+00 | -2.19 | 7.40E-02 | 6.10E-01 |
| <b>AL512791.1</b>  | 1.58  | 3.99E-01 | 1.00E+00 | 1.83  | 7.40E-02 | 6.10E-01 |
| <b>AC127024.4</b>  | 0.37  | 8.71E-01 | 1.00E+00 | -1.99 | 7.41E-02 | 6.10E-01 |
| <b>SCML4</b>       | 1.02  | 4.20E-01 | 1.00E+00 | 1.52  | 7.41E-02 | 6.10E-01 |
| <b>ISL1</b>        | -0.25 | 7.27E-01 | 1.00E+00 | -1.34 | 7.41E-02 | 6.10E-01 |
| <b>MUL1</b>        | 0.04  | 8.09E-01 | 1.00E+00 | 0.18  | 7.41E-02 | 6.10E-01 |
| <b>AC100810.3</b>  | -1.13 | 6.68E-01 | 1.00E+00 | -2.07 | 7.41E-02 | 6.10E-01 |

|             |       |          |          |       |          |          |
|-------------|-------|----------|----------|-------|----------|----------|
| 9-Mar       | -0.25 | 2.81E-01 | 1.00E+00 | 1.13  | 7.41E-02 | 6.10E-01 |
| ADGRA2      | 0.50  | 2.13E-01 | 1.00E+00 | 1.52  | 7.42E-02 | 6.10E-01 |
| VOPP1       | 0.20  | 5.13E-01 | 1.00E+00 | 1.09  | 7.42E-02 | 6.10E-01 |
| FBR5        | -0.42 | 2.19E-01 | 1.00E+00 | 1.20  | 7.42E-02 | 6.10E-01 |
| SLC20A1     | -0.35 | 3.04E-01 | 1.00E+00 | 0.75  | 7.43E-02 | 6.10E-01 |
| ALDH6A1     | 0.23  | 4.31E-01 | 1.00E+00 | -0.69 | 7.43E-02 | 6.10E-01 |
| LINC00909   | 0.01  | 9.46E-01 | 1.00E+00 | -0.49 | 7.43E-02 | 6.10E-01 |
| GTF2E2      | 0.45  | 2.77E-02 | 9.71E-01 | -0.99 | 7.44E-02 | 6.10E-01 |
| RPL29P19    | -0.19 | 8.42E-01 | 1.00E+00 | 2.08  | 7.44E-02 | 6.10E-01 |
| MTFR1L      | -0.03 | 9.12E-01 | 1.00E+00 | -0.58 | 7.44E-02 | 6.10E-01 |
| GDF15       | -0.80 | 1.25E-01 | 1.00E+00 | 1.44  | 7.45E-02 | 6.10E-01 |
| KCNK3       | -0.58 | 4.00E-01 | 1.00E+00 | 1.44  | 7.46E-02 | 6.10E-01 |
| AC022395.1  | 1.19  | 7.32E-01 | 1.00E+00 | -3.64 | 7.46E-02 | 6.10E-01 |
| OR7E14P     | 0.57  | 6.82E-01 | 1.00E+00 | -1.10 | 7.46E-02 | 6.10E-01 |
| VMA21       | 0.27  | 2.98E-01 | 1.00E+00 | -0.52 | 7.46E-02 | 6.10E-01 |
| DOT1L       | -0.29 | 4.22E-01 | 1.00E+00 | 1.19  | 7.46E-02 | 6.10E-01 |
| ZC3H6       | 0.06  | 7.73E-01 | 1.00E+00 | -0.56 | 7.46E-02 | 6.10E-01 |
| TNFRSF1A    | -0.17 | 4.71E-01 | 1.00E+00 | 0.55  | 7.46E-02 | 6.10E-01 |
| VPS9D1      | -0.32 | 2.20E-01 | 1.00E+00 | 0.97  | 7.47E-02 | 6.10E-01 |
| DOC2GP      | -2.86 | 5.06E-02 | 1.00E+00 | 1.90  | 7.47E-02 | 6.10E-01 |
| AL121658.1  | 0.45  | 6.61E-01 | 1.00E+00 | -1.53 | 7.47E-02 | 6.10E-01 |
| XLOC_010579 | -2.94 | 2.11E-02 | 8.94E-01 | 1.29  | 7.47E-02 | 6.10E-01 |
| CD244       | -0.96 | 2.76E-01 | 1.00E+00 | 1.75  | 7.47E-02 | 6.10E-01 |
| ATP5F1B     | -0.08 | 6.32E-01 | 1.00E+00 | -0.27 | 7.48E-02 | 6.10E-01 |
| HELT        | -1.18 | 3.78E-01 | 1.00E+00 | -1.96 | 7.48E-02 | 6.10E-01 |
| ZNF32-AS2   | -0.56 | 7.99E-01 | 1.00E+00 | -1.82 | 7.49E-02 | 6.10E-01 |
| NPEPL1      | 0.16  | 6.26E-01 | 1.00E+00 | -0.38 | 7.49E-02 | 6.10E-01 |
| G13446      | -2.37 | 1.57E-01 | 1.00E+00 | -3.10 | 7.49E-02 | 6.10E-01 |
| GOPC        | 0.02  | 9.30E-01 | 1.00E+00 | -0.42 | 7.49E-02 | 6.10E-01 |
| AC012181.2  | -1.65 | 3.79E-01 | 1.00E+00 | 1.53  | 7.49E-02 | 6.10E-01 |
| HIST1H2BG   | -1.41 | 5.02E-02 | 1.00E+00 | -1.05 | 7.49E-02 | 6.10E-01 |
| WASH3P      | -0.11 | 6.83E-01 | 1.00E+00 | 0.71  | 7.50E-02 | 6.10E-01 |

|                   |       |          |          |       |          |          |
|-------------------|-------|----------|----------|-------|----------|----------|
| <b>FUT8-AS1</b>   | 0.92  | 4.43E-01 | 1.00E+00 | 1.34  | 7.50E-02 | 6.10E-01 |
| <b>RGPD3</b>      | -0.41 | 6.07E-01 | 1.00E+00 | 1.04  | 7.50E-02 | 6.10E-01 |
| <b>ULK4P2</b>     | 0.64  | 7.22E-01 | 1.00E+00 | -1.61 | 7.51E-02 | 6.11E-01 |
| <b>VSTM1</b>      | NA    | NA       | NA       | 3.40  | 7.51E-02 | 6.11E-01 |
| <b>CTTN</b>       | -0.15 | 5.11E-01 | 1.00E+00 | 0.53  | 7.52E-02 | 6.11E-01 |
| <b>ADGRL4</b>     | 0.28  | 6.25E-01 | 1.00E+00 | -0.92 | 7.52E-02 | 6.11E-01 |
| <b>AL135905.2</b> | -0.15 | 8.14E-01 | 1.00E+00 | 1.10  | 7.52E-02 | 6.11E-01 |
| <b>CUL4B</b>      | 0.01  | 9.36E-01 | 1.00E+00 | 0.28  | 7.53E-02 | 6.11E-01 |
| <b>SBNO2</b>      | -0.51 | 4.26E-02 | 1.00E+00 | 1.76  | 7.53E-02 | 6.11E-01 |
| <b>AC147651.3</b> | -1.74 | 8.88E-02 | 1.00E+00 | 1.15  | 7.53E-02 | 6.11E-01 |
| <b>SCG5</b>       | -1.00 | 2.80E-01 | 1.00E+00 | 0.85  | 7.53E-02 | 6.11E-01 |
| <b>GZMM</b>       | -0.60 | 3.35E-01 | 1.00E+00 | 1.60  | 7.53E-02 | 6.11E-01 |
| <b>TMEM176A</b>   | 0.18  | 5.74E-01 | 1.00E+00 | 1.11  | 7.53E-02 | 6.11E-01 |
| <b>EGLN2</b>      | 1.81  | 4.92E-02 | 1.00E+00 | 1.05  | 7.54E-02 | 6.11E-01 |
| <b>TMEM87B</b>    | 0.03  | 8.90E-01 | 1.00E+00 | 0.38  | 7.54E-02 | 6.11E-01 |
| <b>RSU1</b>       | -0.13 | 4.56E-01 | 1.00E+00 | -0.42 | 7.54E-02 | 6.11E-01 |
| <b>TBX6</b>       | 0.49  | 2.13E-01 | 1.00E+00 | 1.11  | 7.54E-02 | 6.11E-01 |
| <b>CRIP2</b>      | -0.18 | 5.74E-01 | 1.00E+00 | -0.40 | 7.55E-02 | 6.11E-01 |
| <b>HSPE1P2</b>    | NA    | NA       | NA       | -1.47 | 7.55E-02 | 6.11E-01 |
| <b>AC026355.2</b> | -0.38 | 7.93E-01 | 1.00E+00 | 2.10  | 7.55E-02 | 6.11E-01 |
| <b>ERVK9-11</b>   | -0.16 | 8.52E-01 | 1.00E+00 | -1.41 | 7.55E-02 | 6.11E-01 |
| <b>AC111170.3</b> | 1.58  | 2.15E-01 | 1.00E+00 | 2.48  | 7.56E-02 | 6.11E-01 |
| <b>ESM1</b>       | -0.19 | 8.38E-01 | 1.00E+00 | 1.71  | 7.56E-02 | 6.11E-01 |
| <b>RARRES1</b>    | 0.38  | 6.65E-01 | 1.00E+00 | -1.19 | 7.56E-02 | 6.11E-01 |
| <b>CAPN11</b>     | 0.45  | 2.73E-01 | 1.00E+00 | -0.88 | 7.57E-02 | 6.12E-01 |
| <b>LINC02099</b>  | NA    | NA       | NA       | 3.34  | 7.58E-02 | 6.12E-01 |
| <b>CTDSPL</b>     | 0.26  | 1.92E-01 | 1.00E+00 | -0.52 | 7.58E-02 | 6.12E-01 |
| <b>FRMD4B</b>     | -0.01 | 9.65E-01 | 1.00E+00 | 0.39  | 7.58E-02 | 6.12E-01 |
| <b>PCDHB16</b>    | 0.23  | 5.63E-01 | 1.00E+00 | -0.84 | 7.59E-02 | 6.12E-01 |
| <b>AC004076.2</b> | 0.63  | 6.39E-01 | 1.00E+00 | -1.57 | 7.59E-02 | 6.12E-01 |
| <b>AL356750.1</b> | 1.66  | 6.25E-01 | 1.00E+00 | -2.49 | 7.59E-02 | 6.12E-01 |
| <b>LINC01819</b>  | -0.72 | 1.50E-01 | 1.00E+00 | -1.22 | 7.59E-02 | 6.12E-01 |

|                   |       |          |          |       |          |          |
|-------------------|-------|----------|----------|-------|----------|----------|
| <b>PNPT1</b>      | 0.10  | 8.03E-01 | 1.00E+00 | 0.51  | 7.59E-02 | 6.12E-01 |
| <b>TMEM232</b>    | 0.19  | 7.60E-01 | 1.00E+00 | -1.13 | 7.59E-02 | 6.12E-01 |
| <b>TLR1</b>       | 0.25  | 6.52E-01 | 1.00E+00 | 0.86  | 7.60E-02 | 6.12E-01 |
| <b>ZNF573</b>     | 0.17  | 6.37E-01 | 1.00E+00 | -0.92 | 7.60E-02 | 6.12E-01 |
| <b>RPA1</b>       | -0.02 | 8.98E-01 | 1.00E+00 | -0.18 | 7.61E-02 | 6.12E-01 |
| <b>NID2</b>       | -0.56 | 2.26E-01 | 1.00E+00 | 1.55  | 7.61E-02 | 6.12E-01 |
| <b>ASB8</b>       | 0.02  | 9.24E-01 | 1.00E+00 | -0.20 | 7.61E-02 | 6.12E-01 |
| <b>AC127070.1</b> | 1.23  | 3.34E-01 | 1.00E+00 | -1.85 | 7.61E-02 | 6.12E-01 |
| <b>CAPN13</b>     | 0.77  | 4.94E-01 | 1.00E+00 | -1.92 | 7.61E-02 | 6.12E-01 |
| <b>ZFYVE26</b>    | 0.04  | 8.48E-01 | 1.00E+00 | 0.98  | 7.62E-02 | 6.12E-01 |
| <b>ABR</b>        | 0.01  | 9.59E-01 | 1.00E+00 | 0.89  | 7.62E-02 | 6.12E-01 |
| <b>WEE1</b>       | -0.09 | 8.63E-01 | 1.00E+00 | -0.72 | 7.62E-02 | 6.12E-01 |
| <b>AL158071.4</b> | 1.18  | 2.45E-01 | 1.00E+00 | 2.04  | 7.62E-02 | 6.12E-01 |
| <b>MRGPRX2</b>    | 1.59  | 3.17E-02 | 1.00E+00 | 1.62  | 7.62E-02 | 6.12E-01 |
| <b>TOR4A</b>      | -0.27 | 5.38E-01 | 1.00E+00 | 1.56  | 7.63E-02 | 6.12E-01 |
| <b>SLFN5</b>      | -0.21 | 6.83E-01 | 1.00E+00 | 0.89  | 7.63E-02 | 6.12E-01 |
| <b>DLD</b>        | 0.02  | 9.41E-01 | 1.00E+00 | -0.50 | 7.65E-02 | 6.13E-01 |
| <b>PEX14</b>      | -0.22 | 4.59E-01 | 1.00E+00 | 0.52  | 7.66E-02 | 6.13E-01 |
| <b>CHST2</b>      | -0.49 | 4.59E-01 | 1.00E+00 | 1.39  | 7.66E-02 | 6.13E-01 |
| <b>SLC9A3</b>     | -0.94 | 5.39E-02 | 1.00E+00 | 0.78  | 7.66E-02 | 6.13E-01 |
| <b>XCL2</b>       | -1.51 | 2.49E-01 | 1.00E+00 | 1.77  | 7.67E-02 | 6.13E-01 |
| <b>MAP2K7</b>     | -0.23 | 2.47E-01 | 1.00E+00 | 0.78  | 7.67E-02 | 6.13E-01 |
| <b>RET</b>        | 0.51  | 4.86E-01 | 1.00E+00 | 1.30  | 7.68E-02 | 6.13E-01 |
| <b>ACTG1P1</b>    | 0.00  | 9.99E-01 | 1.00E+00 | -1.40 | 7.68E-02 | 6.13E-01 |
| <b>FERMT3</b>     | -0.14 | 6.81E-01 | 1.00E+00 | 1.29  | 7.68E-02 | 6.13E-01 |
| <b>SMIM7</b>      | 0.42  | 9.16E-02 | 1.00E+00 | -0.59 | 7.68E-02 | 6.13E-01 |
| <b>OR2S1P</b>     | -0.10 | 9.75E-01 | 1.00E+00 | -3.83 | 7.68E-02 | 6.13E-01 |
| <b>AC087343.1</b> | -0.11 | 9.44E-01 | 1.00E+00 | -1.31 | 7.68E-02 | 6.13E-01 |
| <b>TMEM175</b>    | -0.04 | 8.78E-01 | 1.00E+00 | 0.34  | 7.68E-02 | 6.13E-01 |
| <b>CKMT2</b>      | 0.43  | 5.48E-01 | 1.00E+00 | -0.95 | 7.68E-02 | 6.13E-01 |
| <b>SENP2</b>      | 0.19  | 3.64E-01 | 1.00E+00 | 0.31  | 7.68E-02 | 6.13E-01 |
| <b>SMIM24</b>     | -0.84 | 3.69E-01 | 1.00E+00 | -1.41 | 7.69E-02 | 6.13E-01 |

|                    |       |          |          |       |          |          |
|--------------------|-------|----------|----------|-------|----------|----------|
| <b>PFKFB4</b>      | -0.34 | 2.38E-01 | 1.00E+00 | 0.98  | 7.69E-02 | 6.13E-01 |
| <b>AC008892.1</b>  | -0.86 | 8.05E-01 | 1.00E+00 | -2.29 | 7.69E-02 | 6.13E-01 |
| <b>PHLDA2</b>      | -0.88 | 1.61E-01 | 1.00E+00 | 0.68  | 7.70E-02 | 6.13E-01 |
| <b>GZMA</b>        | -0.53 | 5.26E-01 | 1.00E+00 | 1.27  | 7.70E-02 | 6.13E-01 |
| <b>AL360270.3</b>  | -3.41 | 2.40E-01 | 1.00E+00 | 1.99  | 7.70E-02 | 6.13E-01 |
| <b>IER3IP1</b>     | 0.18  | 5.09E-01 | 1.00E+00 | -0.78 | 7.70E-02 | 6.13E-01 |
| <b>RAC2</b>        | -0.06 | 8.95E-01 | 1.00E+00 | 1.21  | 7.71E-02 | 6.13E-01 |
| <b>XBP1</b>        | -0.11 | 7.53E-01 | 1.00E+00 | -0.82 | 7.71E-02 | 6.13E-01 |
| <b>CD163L1</b>     | 0.72  | 1.42E-01 | 1.00E+00 | 0.65  | 7.71E-02 | 6.13E-01 |
| <b>XLOC_009723</b> | 0.16  | 9.21E-01 | 1.00E+00 | -1.76 | 7.71E-02 | 6.13E-01 |
| <b>ADAMTS9-AS1</b> | 0.67  | 6.20E-01 | 1.00E+00 | -1.40 | 7.72E-02 | 6.13E-01 |
| <b>NRIR</b>        | 3.10  | 3.60E-01 | 1.00E+00 | 2.58  | 7.72E-02 | 6.13E-01 |
| <b>PDLIM7</b>      | -0.51 | 2.57E-01 | 1.00E+00 | 0.63  | 7.72E-02 | 6.13E-01 |
| <b>AC087633.2</b>  | -1.26 | 3.26E-01 | 1.00E+00 | -1.05 | 7.73E-02 | 6.13E-01 |
| <b>XLOC_002344</b> | -0.18 | 9.07E-01 | 1.00E+00 | -1.57 | 7.73E-02 | 6.13E-01 |
| <b>ADAM10</b>      | 0.21  | 4.53E-01 | 1.00E+00 | 0.30  | 7.73E-02 | 6.13E-01 |
| <b>AC098484.4</b>  | 0.64  | 5.02E-01 | 1.00E+00 | -1.15 | 7.73E-02 | 6.13E-01 |
| <b>AC005829.2</b>  | -1.16 | 6.40E-01 | 1.00E+00 | -3.71 | 7.74E-02 | 6.14E-01 |
| <b>DOCK9-DT</b>    | -0.10 | 8.00E-01 | 1.00E+00 | -0.90 | 7.74E-02 | 6.14E-01 |
| <b>CUL2</b>        | 0.11  | 4.87E-01 | 1.00E+00 | -0.30 | 7.74E-02 | 6.14E-01 |
| <b>MIA</b>         | NA    | NA       | NA       | -1.39 | 7.74E-02 | 6.14E-01 |
| <b>PSD</b>         | -1.68 | 2.88E-03 | 2.79E-01 | 0.72  | 7.75E-02 | 6.14E-01 |
| <b>FAM30A</b>      | 0.87  | 7.56E-01 | 1.00E+00 | 2.63  | 7.75E-02 | 6.14E-01 |
| <b>C1orf74</b>     | -0.25 | 6.04E-01 | 1.00E+00 | 0.60  | 7.75E-02 | 6.14E-01 |
| <b>FP325330.3</b>  | 0.10  | 9.36E-01 | 1.00E+00 | -3.08 | 7.76E-02 | 6.14E-01 |
| <b>DCK</b>         | 0.32  | 3.22E-01 | 1.00E+00 | -0.51 | 7.76E-02 | 6.14E-01 |
| <b>PCDHA11</b>     | -2.34 | 8.67E-02 | 1.00E+00 | -2.70 | 7.76E-02 | 6.14E-01 |
| <b>XLOC_010989</b> | -2.39 | 4.35E-01 | 1.00E+00 | -3.27 | 7.76E-02 | 6.14E-01 |
| <b>NDRG2</b>       | -0.03 | 9.11E-01 | 1.00E+00 | -0.43 | 7.76E-02 | 6.14E-01 |
| <b>CARHSP1</b>     | 0.04  | 9.12E-01 | 1.00E+00 | 0.47  | 7.77E-02 | 6.14E-01 |
| <b>EEF2KMT</b>     | -0.31 | 2.16E-01 | 1.00E+00 | 0.40  | 7.78E-02 | 6.14E-01 |
| <b>TM6SF2</b>      | 0.01  | 9.98E-01 | 1.00E+00 | 1.85  | 7.78E-02 | 6.14E-01 |

|                    |       |          |          |       |          |          |
|--------------------|-------|----------|----------|-------|----------|----------|
| <b>G14339</b>      | 0.86  | 5.90E-01 | 1.00E+00 | 1.24  | 7.78E-02 | 6.14E-01 |
| <b>LDHAP3</b>      | 1.02  | 7.67E-01 | 1.00E+00 | -1.35 | 7.78E-02 | 6.14E-01 |
| <b>CCL13</b>       | 0.17  | 7.91E-01 | 1.00E+00 | 0.97  | 7.78E-02 | 6.14E-01 |
| <b>F8A3</b>        | -0.04 | 9.59E-01 | 1.00E+00 | -1.37 | 7.79E-02 | 6.14E-01 |
| <b>RPL12P47</b>    | NA    | NA       | NA       | -1.16 | 7.79E-02 | 6.14E-01 |
| <b>PGF</b>         | -0.76 | 7.40E-03 | 5.23E-01 | 0.88  | 7.80E-02 | 6.14E-01 |
| <b>IFI44L</b>      | 1.03  | 3.28E-01 | 1.00E+00 | 1.21  | 7.80E-02 | 6.14E-01 |
| <b>TM9SF3</b>      | 0.14  | 4.45E-01 | 1.00E+00 | -0.55 | 7.80E-02 | 6.14E-01 |
| <b>AP001033.1</b>  | -2.67 | 3.64E-01 | 1.00E+00 | -2.23 | 7.81E-02 | 6.14E-01 |
| <b>CHD2</b>        | -0.09 | 7.19E-01 | 1.00E+00 | 0.55  | 7.81E-02 | 6.14E-01 |
| <b>FOXA1</b>       | 0.07  | 9.55E-01 | 1.00E+00 | -1.78 | 7.81E-02 | 6.14E-01 |
| <b>ADH6</b>        | -0.36 | 6.55E-01 | 1.00E+00 | -1.53 | 7.81E-02 | 6.14E-01 |
| <b>AC026271.1</b>  | 0.33  | 2.46E-01 | 1.00E+00 | -0.61 | 7.81E-02 | 6.14E-01 |
| <b>IQCA1</b>       | -0.58 | 4.38E-01 | 1.00E+00 | 1.13  | 7.81E-02 | 6.14E-01 |
| <b>THY1</b>        | -0.48 | 4.74E-01 | 1.00E+00 | 1.10  | 7.81E-02 | 6.14E-01 |
| <b>LSM12</b>       | -0.26 | 1.70E-01 | 1.00E+00 | -0.32 | 7.81E-02 | 6.14E-01 |
| <b>NUDCD2</b>      | 0.02  | 9.19E-01 | 1.00E+00 | -0.62 | 7.81E-02 | 6.14E-01 |
| <b>XLOC_012894</b> | -0.33 | 4.34E-01 | 1.00E+00 | 0.56  | 7.82E-02 | 6.14E-01 |
| <b>COMMD4</b>      | -0.21 | 3.03E-01 | 1.00E+00 | 0.31  | 7.82E-02 | 6.14E-01 |
| <b>MED13</b>       | -0.05 | 8.29E-01 | 1.00E+00 | 0.58  | 7.82E-02 | 6.14E-01 |
| <b>POM121B</b>     | 0.26  | 7.27E-01 | 1.00E+00 | 1.48  | 7.82E-02 | 6.14E-01 |
| <b>SRPK2</b>       | -0.03 | 8.62E-01 | 1.00E+00 | 0.32  | 7.83E-02 | 6.14E-01 |
| <b>AC007496.1</b>  | 0.01  | 9.98E-01 | 1.00E+00 | -2.08 | 7.83E-02 | 6.14E-01 |
| <b>POLI</b>        | 0.22  | 5.07E-01 | 1.00E+00 | -0.67 | 7.83E-02 | 6.14E-01 |
| <b>WFDC3</b>       | 0.01  | 9.93E-01 | 1.00E+00 | -1.34 | 7.84E-02 | 6.14E-01 |
| <b>PIWIL1</b>      | -2.88 | 1.60E-01 | 1.00E+00 | 3.29  | 7.84E-02 | 6.14E-01 |
| <b>PCYT2</b>       | -0.27 | 3.18E-01 | 1.00E+00 | -0.94 | 7.85E-02 | 6.14E-01 |
| <b>AL158211.5</b>  | -0.09 | 9.53E-01 | 1.00E+00 | -2.24 | 7.85E-02 | 6.14E-01 |
| <b>ZNF652</b>      | 0.25  | 2.12E-01 | 1.00E+00 | -0.53 | 7.85E-02 | 6.14E-01 |
| <b>AC108097.1</b>  | -2.85 | 1.12E-01 | 1.00E+00 | -1.74 | 7.85E-02 | 6.14E-01 |
| <b>AP003392.6</b>  | -0.14 | 9.61E-01 | 1.00E+00 | 1.58  | 7.86E-02 | 6.14E-01 |
| <b>ZNF563</b>      | -0.13 | 6.37E-01 | 1.00E+00 | -0.71 | 7.86E-02 | 6.14E-01 |

|              |       |          |          |       |          |          |
|--------------|-------|----------|----------|-------|----------|----------|
| SSU72        | -0.08 | 6.30E-01 | 1.00E+00 | -0.44 | 7.86E-02 | 6.14E-01 |
| XLOC_009944  | 1.46  | 4.52E-01 | 1.00E+00 | 1.60  | 7.87E-02 | 6.14E-01 |
| AC015914.1   | -0.22 | 9.21E-01 | 1.00E+00 | -2.02 | 7.87E-02 | 6.14E-01 |
| LINC00629    | -1.78 | 6.06E-01 | 1.00E+00 | -2.74 | 7.87E-02 | 6.14E-01 |
| AL136116.3   | 0.35  | 5.47E-01 | 1.00E+00 | -0.77 | 7.87E-02 | 6.14E-01 |
| AL139289.1   | -1.54 | 4.16E-01 | 1.00E+00 | 2.62  | 7.88E-02 | 6.15E-01 |
| ZBTB17       | -0.07 | 7.05E-01 | 1.00E+00 | 0.62  | 7.89E-02 | 6.15E-01 |
| OACYLP       | -0.93 | 5.85E-01 | 1.00E+00 | 2.80  | 7.89E-02 | 6.15E-01 |
| ZNF675       | -0.16 | 6.88E-01 | 1.00E+00 | -0.69 | 7.89E-02 | 6.15E-01 |
| TGIF1        | -0.18 | 5.30E-01 | 1.00E+00 | 0.33  | 7.89E-02 | 6.15E-01 |
| ZFHX3        | -0.06 | 8.41E-01 | 1.00E+00 | 0.61  | 7.90E-02 | 6.15E-01 |
| ARL6IP5      | 0.36  | 2.70E-01 | 1.00E+00 | -0.63 | 7.90E-02 | 6.15E-01 |
| DZANK1       | 0.01  | 9.85E-01 | 1.00E+00 | -0.64 | 7.90E-02 | 6.15E-01 |
| WFDC21P      | 0.92  | 1.21E-01 | 1.00E+00 | -1.37 | 7.91E-02 | 6.15E-01 |
| LAT2         | -0.08 | 8.47E-01 | 1.00E+00 | 0.95  | 7.91E-02 | 6.15E-01 |
| DISC1        | 0.49  | 2.54E-01 | 1.00E+00 | 1.14  | 7.92E-02 | 6.15E-01 |
| FUT3         | -1.21 | 8.94E-03 | 5.88E-01 | 1.40  | 7.92E-02 | 6.15E-01 |
| COLGALT2     | 0.09  | 8.93E-01 | 1.00E+00 | 1.43  | 7.92E-02 | 6.15E-01 |
| KLRD1        | 0.02  | 9.85E-01 | 1.00E+00 | 1.43  | 7.92E-02 | 6.16E-01 |
| HNRNPA1P54   | -0.51 | 8.83E-01 | 1.00E+00 | -1.59 | 7.93E-02 | 6.16E-01 |
| FAM206A      | 0.26  | 2.01E-01 | 1.00E+00 | -0.61 | 7.94E-02 | 6.16E-01 |
| MTHFD2       | 0.03  | 9.15E-01 | 1.00E+00 | 0.45  | 7.94E-02 | 6.16E-01 |
| LRTOMT       | 0.52  | 2.36E-01 | 1.00E+00 | -0.81 | 7.95E-02 | 6.16E-01 |
| USP44        | 0.99  | 1.66E-01 | 1.00E+00 | -1.22 | 7.95E-02 | 6.16E-01 |
| PTPN12       | 0.06  | 7.85E-01 | 1.00E+00 | 0.57  | 7.96E-02 | 6.16E-01 |
| AC124319.2   | 0.63  | 3.38E-01 | 1.00E+00 | 1.55  | 7.96E-02 | 6.16E-01 |
| RP11-277L2.3 | -2.02 | 3.96E-01 | 1.00E+00 | 1.22  | 7.96E-02 | 6.16E-01 |
| SLC28A1      | 1.34  | 6.98E-01 | 1.00E+00 | 2.64  | 7.97E-02 | 6.16E-01 |
| GNAS-AS1     | -1.39 | 3.28E-01 | 1.00E+00 | 1.98  | 7.98E-02 | 6.16E-01 |
| SUGCT        | 0.49  | 4.37E-01 | 1.00E+00 | 0.75  | 7.98E-02 | 6.16E-01 |
| TRAV8-6      | 1.73  | 4.12E-01 | 1.00E+00 | 2.06  | 7.98E-02 | 6.16E-01 |
| FCGR2B       | 0.09  | 8.50E-01 | 1.00E+00 | 0.66  | 7.98E-02 | 6.16E-01 |



|                    |       |          |          |       |          |          |
|--------------------|-------|----------|----------|-------|----------|----------|
| <b>CCDC13-AS1</b>  | 0.79  | 6.87E-01 | 1.00E+00 | -2.04 | 7.98E-02 | 6.16E-01 |
| <b>EEF1A1P11</b>   | -0.30 | 5.85E-01 | 1.00E+00 | -0.68 | 7.98E-02 | 6.16E-01 |
| <b>LCK</b>         | -0.98 | 1.68E-01 | 1.00E+00 | 1.24  | 7.99E-02 | 6.16E-01 |
| <b>APP</b>         | 0.03  | 9.14E-01 | 1.00E+00 | 0.87  | 7.99E-02 | 6.16E-01 |
| <b>MRPS6</b>       | 0.07  | 7.63E-01 | 1.00E+00 | -0.45 | 7.99E-02 | 6.16E-01 |
| <b>G36288</b>      | 0.10  | 8.94E-01 | 1.00E+00 | -1.10 | 7.99E-02 | 6.16E-01 |
| <b>AC025580.1</b>  | -2.29 | 2.33E-01 | 1.00E+00 | 1.81  | 7.99E-02 | 6.16E-01 |
| <b>AC093724.1</b>  | 0.82  | 7.97E-02 | 1.00E+00 | 1.56  | 7.99E-02 | 6.16E-01 |
| <b>MPP1</b>        | -0.11 | 7.27E-01 | 1.00E+00 | 0.53  | 7.99E-02 | 6.16E-01 |
| <b>VGLL4</b>       | -0.02 | 8.93E-01 | 1.00E+00 | 0.39  | 8.00E-02 | 6.16E-01 |
| <b>DPY19L2P2</b>   | -0.43 | 4.41E-01 | 1.00E+00 | 1.19  | 8.00E-02 | 6.16E-01 |
| <b>CACYBPP2</b>    | -0.04 | 9.72E-01 | 1.00E+00 | -0.97 | 8.00E-02 | 6.16E-01 |
| <b>SUZ12</b>       | 0.08  | 7.73E-01 | 1.00E+00 | -0.50 | 8.00E-02 | 6.16E-01 |
| <b>SRP9P1</b>      | 0.50  | 2.85E-01 | 1.00E+00 | -0.60 | 8.01E-02 | 6.16E-01 |
| <b>LRRC8B</b>      | -0.38 | 2.83E-01 | 1.00E+00 | -0.54 | 8.01E-02 | 6.16E-01 |
| <b>TRIM23</b>      | 0.14  | 7.05E-01 | 1.00E+00 | -0.59 | 8.01E-02 | 6.16E-01 |
| <b>IGLVI-70</b>    | 0.00  | 1.00E+00 | NA       | 5.38  | 8.01E-02 | 6.16E-01 |
| <b>CCDC65</b>      | 0.02  | 9.78E-01 | 1.00E+00 | 1.21  | 8.01E-02 | 6.16E-01 |
| <b>AL035413.2</b>  | -0.50 | 3.62E-01 | 1.00E+00 | -0.95 | 8.02E-02 | 6.16E-01 |
| <b>SLC25A20</b>    | 0.76  | 4.76E-02 | 1.00E+00 | -0.62 | 8.02E-02 | 6.16E-01 |
| <b>COL24A1</b>     | -0.75 | 3.82E-01 | 1.00E+00 | 1.50  | 8.02E-02 | 6.16E-01 |
| <b>C12orf77</b>    | -1.40 | 3.93E-01 | 1.00E+00 | -2.71 | 8.02E-02 | 6.16E-01 |
| <b>NDEL1</b>       | 0.03  | 9.44E-01 | 1.00E+00 | 0.43  | 8.02E-02 | 6.16E-01 |
| <b>XLOC_009217</b> | -0.24 | 7.15E-01 | 1.00E+00 | -1.64 | 8.03E-02 | 6.16E-01 |
| <b>BAALC-AS1</b>   | -0.36 | 6.31E-01 | 1.00E+00 | -0.60 | 8.03E-02 | 6.16E-01 |
| <b>PCED1B-AS1</b>  | -0.51 | 5.30E-01 | 1.00E+00 | 1.15  | 8.03E-02 | 6.16E-01 |
| <b>LACC1</b>       | -0.07 | 8.06E-01 | 1.00E+00 | 0.32  | 8.03E-02 | 6.16E-01 |
| <b>TRIM14</b>      | 0.18  | 7.01E-01 | 1.00E+00 | 0.84  | 8.04E-02 | 6.16E-01 |
| <b>AC007485.1</b>  | -1.90 | 5.74E-01 | 1.00E+00 | 2.10  | 8.04E-02 | 6.16E-01 |
| <b>SETD1A</b>      | -0.61 | 2.54E-02 | 9.29E-01 | 1.30  | 8.06E-02 | 6.17E-01 |
| <b>CDK12</b>       | -0.28 | 2.18E-01 | 1.00E+00 | 0.68  | 8.06E-02 | 6.18E-01 |
| <b>PSMB8</b>       | -0.16 | 6.13E-01 | 1.00E+00 | 0.54  | 8.07E-02 | 6.18E-01 |

|             |       |          |          |       |          |          |
|-------------|-------|----------|----------|-------|----------|----------|
| MT-TD       | NA    | NA       | NA       | -2.51 | 8.07E-02 | 6.18E-01 |
| LINC02547   | -0.21 | 8.75E-01 | 1.00E+00 | -3.31 | 8.07E-02 | 6.18E-01 |
| AC019080.5  | 2.52  | 4.04E-01 | 1.00E+00 | 2.58  | 8.08E-02 | 6.18E-01 |
| TPPP        | -0.25 | 5.57E-01 | 1.00E+00 | -0.98 | 8.08E-02 | 6.18E-01 |
| FABP5       | 0.11  | 7.52E-01 | 1.00E+00 | 0.65  | 8.08E-02 | 6.18E-01 |
| C20orf194   | 0.68  | 1.25E-01 | 1.00E+00 | 0.79  | 8.08E-02 | 6.18E-01 |
| XLOC_006169 | -0.47 | 5.94E-01 | 1.00E+00 | -1.34 | 8.09E-02 | 6.18E-01 |
| NGF         | -0.44 | 4.24E-01 | 1.00E+00 | 1.42  | 8.09E-02 | 6.18E-01 |
| JSRP1       | 2.01  | 2.09E-01 | 1.00E+00 | 2.57  | 8.09E-02 | 6.18E-01 |
| RPL7P21     | -0.49 | 7.65E-01 | 1.00E+00 | -1.09 | 8.10E-02 | 6.18E-01 |
| ZNF569      | 0.05  | 8.72E-01 | 1.00E+00 | -0.64 | 8.10E-02 | 6.18E-01 |
| FAM13A-AS1  | 1.05  | 3.51E-01 | 1.00E+00 | 1.30  | 8.10E-02 | 6.18E-01 |
| HEATR4      | 0.00  | 9.98E-01 | 1.00E+00 | 1.26  | 8.10E-02 | 6.18E-01 |
| AL627402.1  | -1.15 | 4.77E-01 | 1.00E+00 | -0.85 | 8.11E-02 | 6.18E-01 |
| MROH2A      | -0.83 | 2.12E-01 | 1.00E+00 | -1.56 | 8.11E-02 | 6.18E-01 |
| EVC         | -0.07 | 8.23E-01 | 1.00E+00 | 1.26  | 8.12E-02 | 6.18E-01 |
| IRF2        | 0.00  | 9.98E-01 | 1.00E+00 | 0.45  | 8.12E-02 | 6.18E-01 |
| G19573      | -2.10 | 6.81E-02 | 1.00E+00 | -1.67 | 8.12E-02 | 6.18E-01 |
| GGA3        | -0.17 | 4.81E-01 | 1.00E+00 | 0.62  | 8.12E-02 | 6.18E-01 |
| AC002306.1  | -1.71 | 6.18E-01 | 1.00E+00 | -2.47 | 8.12E-02 | 6.18E-01 |
| AL390728.6  | 0.62  | 3.12E-01 | 1.00E+00 | -0.92 | 8.12E-02 | 6.18E-01 |
| TRAV12-3    | -0.30 | 9.01E-01 | 1.00E+00 | 1.85  | 8.13E-02 | 6.18E-01 |
| AC026254.2  | -1.86 | 2.01E-01 | 1.00E+00 | 2.05  | 8.13E-02 | 6.18E-01 |
| AC080188.2  | -3.16 | 6.62E-03 | 4.93E-01 | 1.29  | 8.14E-02 | 6.18E-01 |
| AL513318.2  | 1.54  | 6.83E-02 | 1.00E+00 | 1.89  | 8.14E-02 | 6.18E-01 |
| RAPGEF1     | 0.03  | 9.01E-01 | 1.00E+00 | 1.10  | 8.14E-02 | 6.18E-01 |
| TTC32       | -0.25 | 4.64E-01 | 1.00E+00 | -0.76 | 8.14E-02 | 6.18E-01 |
| PDCD1LG2    | 0.47  | 2.59E-01 | 1.00E+00 | 1.12  | 8.14E-02 | 6.18E-01 |
| RYK         | 0.40  | 5.33E-02 | 1.00E+00 | -0.63 | 8.15E-02 | 6.18E-01 |
| POR         | -0.06 | 7.90E-01 | 1.00E+00 | 0.55  | 8.15E-02 | 6.18E-01 |
| CDK18       | -0.62 | 1.17E-01 | 1.00E+00 | 1.26  | 8.15E-02 | 6.18E-01 |
| NFYC        | -0.06 | 7.21E-01 | 1.00E+00 | -0.20 | 8.15E-02 | 6.18E-01 |

|                    |       |          |          |       |          |          |
|--------------------|-------|----------|----------|-------|----------|----------|
| VWF                | 0.39  | 5.46E-01 | 1.00E+00 | 1.12  | 8.16E-02 | 6.19E-01 |
| G28914             | -0.49 | 6.25E-01 | 1.00E+00 | -1.86 | 8.16E-02 | 6.19E-01 |
| AC010761.1         | 0.14  | 8.55E-01 | 1.00E+00 | 1.36  | 8.17E-02 | 6.19E-01 |
| IGHV3-9            | 7.72  | 5.32E-08 | 2.27E-05 | 2.23  | 8.17E-02 | 6.19E-01 |
| KDSR               | 0.19  | 3.56E-01 | 1.00E+00 | -0.42 | 8.18E-02 | 6.20E-01 |
| UBR4               | 0.22  | 4.04E-01 | 1.00E+00 | 0.55  | 8.20E-02 | 6.20E-01 |
| ZNF689             | -0.07 | 7.75E-01 | 1.00E+00 | 0.54  | 8.20E-02 | 6.20E-01 |
| FAM129B            | 0.00  | 9.86E-01 | 1.00E+00 | 1.29  | 8.20E-02 | 6.20E-01 |
| 5-Sep              | -0.79 | 4.76E-01 | 1.00E+00 | 0.83  | 8.20E-02 | 6.20E-01 |
| KBTBD4             | -0.30 | 4.09E-01 | 1.00E+00 | -0.35 | 8.20E-02 | 6.20E-01 |
| SH3PXD2A           | -0.21 | 4.62E-01 | 1.00E+00 | 0.87  | 8.20E-02 | 6.20E-01 |
| PPIAP41            | -1.20 | 5.22E-01 | 1.00E+00 | -2.30 | 8.20E-02 | 6.20E-01 |
| FKBPL              | 0.12  | 6.90E-01 | 1.00E+00 | 0.58  | 8.20E-02 | 6.20E-01 |
| VENTX              | 0.46  | 4.54E-01 | 1.00E+00 | 2.01  | 8.21E-02 | 6.20E-01 |
| THAP12P7           | 0.88  | 4.52E-01 | 1.00E+00 | -1.51 | 8.21E-02 | 6.20E-01 |
| SMURF2P1-LRRC37BP1 | -0.56 | 8.08E-01 | 1.00E+00 | 1.15  | 8.21E-02 | 6.20E-01 |
| AP000695.1         | 0.67  | 5.40E-01 | 1.00E+00 | 1.93  | 8.22E-02 | 6.20E-01 |
| OTUD7A             | -0.47 | 1.37E-01 | 1.00E+00 | -0.79 | 8.23E-02 | 6.20E-01 |
| SPAG1              | 0.11  | 8.52E-01 | 1.00E+00 | -0.68 | 8.23E-02 | 6.20E-01 |
| TBCCD1             | -0.05 | 8.68E-01 | 1.00E+00 | -0.50 | 8.23E-02 | 6.20E-01 |
| AC104596.1         | -0.20 | 7.71E-01 | 1.00E+00 | 1.39  | 8.23E-02 | 6.20E-01 |
| LGALS3             | -0.03 | 9.00E-01 | 1.00E+00 | -0.45 | 8.23E-02 | 6.20E-01 |
| AC073264.3         | 2.07  | 7.21E-02 | 1.00E+00 | 1.30  | 8.24E-02 | 6.20E-01 |
| ITGA5              | 0.10  | 8.10E-01 | 1.00E+00 | 1.02  | 8.24E-02 | 6.20E-01 |
| SCGB2A2            | 0.33  | 8.07E-01 | 1.00E+00 | -1.62 | 8.25E-02 | 6.20E-01 |
| CNTN6              | 1.53  | 6.44E-01 | 1.00E+00 | 2.45  | 8.25E-02 | 6.20E-01 |
| KRT8P3             | -0.27 | 8.41E-01 | 1.00E+00 | -1.45 | 8.25E-02 | 6.20E-01 |
| AP000786.1         | 0.98  | 6.87E-01 | 1.00E+00 | -2.61 | 8.26E-02 | 6.20E-01 |
| XLOC_010145        | -0.08 | 9.50E-01 | 1.00E+00 | 1.49  | 8.26E-02 | 6.20E-01 |
| IGLV7-46           | -0.11 | 9.67E-01 | 1.00E+00 | 2.56  | 8.26E-02 | 6.20E-01 |
| AC099494.3         | 1.27  | 7.13E-01 | 1.00E+00 | -3.02 | 8.27E-02 | 6.20E-01 |
| SCDP1              | 1.96  | 5.66E-01 | 1.00E+00 | -2.32 | 8.27E-02 | 6.20E-01 |

|                    |       |          |          |       |          |          |
|--------------------|-------|----------|----------|-------|----------|----------|
| <b>AC008895.1</b>  | -0.25 | 9.28E-01 | 1.00E+00 | 1.56  | 8.27E-02 | 6.20E-01 |
| <b>VPS53</b>       | -0.11 | 6.80E-01 | 1.00E+00 | 0.49  | 8.27E-02 | 6.20E-01 |
| <b>AC098613.1</b>  | -1.40 | 5.76E-01 | 1.00E+00 | 1.52  | 8.27E-02 | 6.20E-01 |
| <b>GTF2IRD2P1</b>  | 0.76  | 4.75E-01 | 1.00E+00 | -1.40 | 8.27E-02 | 6.20E-01 |
| <b>ERO1A</b>       | -0.05 | 8.35E-01 | 1.00E+00 | 0.32  | 8.27E-02 | 6.20E-01 |
| <b>DLK1</b>        | -0.38 | 6.95E-01 | 1.00E+00 | -2.12 | 8.28E-02 | 6.20E-01 |
| <b>FTH1P5</b>      | 0.10  | 9.61E-01 | 1.00E+00 | -1.21 | 8.28E-02 | 6.20E-01 |
| <b>RAB34</b>       | -0.14 | 6.10E-01 | 1.00E+00 | 0.33  | 8.28E-02 | 6.20E-01 |
| <b>TRAV8-2</b>     | 1.59  | 4.53E-01 | 1.00E+00 | 1.61  | 8.29E-02 | 6.21E-01 |
| <b>LINC02018</b>   | -1.31 | 2.00E-01 | 1.00E+00 | -0.99 | 8.29E-02 | 6.21E-01 |
| <b>ADCY7</b>       | 0.10  | 7.25E-01 | 1.00E+00 | 1.20  | 8.29E-02 | 6.21E-01 |
| <b>FBXO39</b>      | -1.49 | 1.18E-01 | 1.00E+00 | 1.73  | 8.30E-02 | 6.21E-01 |
| <b>FAS</b>         | -0.34 | 3.82E-01 | 1.00E+00 | 0.47  | 8.30E-02 | 6.21E-01 |
| <b>AC007342.9</b>  | -1.69 | 2.46E-01 | 1.00E+00 | -2.03 | 8.30E-02 | 6.21E-01 |
| <b>AC131934.1</b>  | 1.85  | 7.17E-02 | 1.00E+00 | 1.69  | 8.30E-02 | 6.21E-01 |
| <b>MANEA</b>       | -0.13 | 7.30E-01 | 1.00E+00 | -0.39 | 8.31E-02 | 6.21E-01 |
| <b>INPPL1</b>      | -0.06 | 8.29E-01 | 1.00E+00 | 1.12  | 8.32E-02 | 6.21E-01 |
| <b>EPHB2</b>       | -0.36 | 5.50E-01 | 1.00E+00 | 1.21  | 8.32E-02 | 6.21E-01 |
| <b>ATXN1</b>       | 0.06  | 8.19E-01 | 1.00E+00 | 0.42  | 8.32E-02 | 6.21E-01 |
| <b>XLOC_000190</b> | 0.51  | 5.79E-01 | 1.00E+00 | -1.35 | 8.33E-02 | 6.21E-01 |
| <b>MIR663AHG</b>   | -0.22 | 7.13E-01 | 1.00E+00 | -1.66 | 8.33E-02 | 6.21E-01 |
| <b>EDRF1</b>       | 0.09  | 7.93E-01 | 1.00E+00 | -0.43 | 8.33E-02 | 6.21E-01 |
| <b>COQ10A</b>      | -0.41 | 3.76E-01 | 1.00E+00 | -0.75 | 8.34E-02 | 6.21E-01 |
| <b>USP30</b>       | -0.09 | 6.41E-01 | 1.00E+00 | -0.37 | 8.34E-02 | 6.21E-01 |
| <b>RNASSET2</b>    | -0.28 | 3.23E-01 | 1.00E+00 | 0.74  | 8.34E-02 | 6.21E-01 |
| <b>UBASH3B</b>     | 0.28  | 6.86E-01 | 1.00E+00 | 0.79  | 8.34E-02 | 6.21E-01 |
| <b>GSDMD</b>       | -0.43 | 2.14E-01 | 1.00E+00 | 0.87  | 8.34E-02 | 6.21E-01 |
| <b>FGF1</b>        | -0.10 | 9.03E-01 | 1.00E+00 | -0.90 | 8.34E-02 | 6.21E-01 |
| <b>FBXW11P1</b>    | 1.65  | 3.47E-01 | 1.00E+00 | -2.42 | 8.35E-02 | 6.21E-01 |
| <b>AC092634.4</b>  | 0.62  | 5.59E-01 | 1.00E+00 | -1.36 | 8.35E-02 | 6.21E-01 |
| <b>XLOC_011016</b> | 0.78  | 2.82E-01 | 1.00E+00 | -1.23 | 8.35E-02 | 6.21E-01 |
| <b>AP001542.3</b>  | 0.04  | 8.65E-01 | 1.00E+00 | -0.94 | 8.35E-02 | 6.21E-01 |

|                   |       |          |          |       |          |          |
|-------------------|-------|----------|----------|-------|----------|----------|
| <b>AC005488.1</b> | 0.69  | 4.22E-01 | 1.00E+00 | 1.24  | 8.36E-02 | 6.21E-01 |
| KLK13             | -0.66 | 2.20E-01 | 1.00E+00 | 1.41  | 8.37E-02 | 6.21E-01 |
| PRR33             | -0.26 | 7.65E-01 | 1.00E+00 | 1.93  | 8.37E-02 | 6.21E-01 |
| SH3BP1            | -0.24 | 5.97E-01 | 1.00E+00 | 0.99  | 8.37E-02 | 6.21E-01 |
| <b>AC016877.3</b> | 0.99  | 2.32E-01 | 1.00E+00 | -1.83 | 8.38E-02 | 6.21E-01 |
| HMGXB4            | 0.12  | 4.68E-01 | 1.00E+00 | 0.34  | 8.38E-02 | 6.21E-01 |
| EPAS1             | 0.18  | 6.28E-01 | 1.00E+00 | 0.81  | 8.39E-02 | 6.21E-01 |
| <b>AC007382.1</b> | 0.01  | 9.71E-01 | 1.00E+00 | 0.67  | 8.39E-02 | 6.21E-01 |
| SLC1A6            | -0.71 | 1.76E-01 | 1.00E+00 | -1.19 | 8.39E-02 | 6.21E-01 |
| INSIG1            | 0.27  | 4.56E-01 | 1.00E+00 | -0.92 | 8.39E-02 | 6.21E-01 |
| <b>AP001623.1</b> | -0.41 | 4.41E-01 | 1.00E+00 | 1.04  | 8.39E-02 | 6.21E-01 |
| AKT3              | 0.44  | 3.43E-01 | 1.00E+00 | 1.09  | 8.39E-02 | 6.21E-01 |
| <b>AC007424.1</b> | 0.60  | 6.87E-01 | 1.00E+00 | -2.23 | 8.39E-02 | 6.21E-01 |
| BCAT1             | -0.01 | 9.82E-01 | 1.00E+00 | 1.06  | 8.39E-02 | 6.21E-01 |
| NADSYN1           | 0.05  | 8.71E-01 | 1.00E+00 | 0.40  | 8.40E-02 | 6.22E-01 |
| PLXNC1            | -0.29 | 2.70E-01 | 1.00E+00 | 0.95  | 8.41E-02 | 6.22E-01 |
| <b>HNRNPA1L2</b>  | 0.04  | 9.23E-01 | 1.00E+00 | 0.51  | 8.41E-02 | 6.22E-01 |
| CD24P4            | -0.15 | 6.36E-01 | 1.00E+00 | 1.06  | 8.41E-02 | 6.22E-01 |
| CA6               | -0.55 | 3.35E-01 | 1.00E+00 | -1.33 | 8.42E-02 | 6.22E-01 |
| <b>MADCAM1</b>    | -0.08 | 9.36E-01 | 1.00E+00 | 1.38  | 8.43E-02 | 6.22E-01 |
| TAB1              | -0.07 | 6.89E-01 | 1.00E+00 | 0.66  | 8.43E-02 | 6.22E-01 |
| LPIN2             | 0.44  | 2.02E-01 | 1.00E+00 | 1.00  | 8.43E-02 | 6.22E-01 |
| <b>AC007388.1</b> | 0.23  | 3.81E-01 | 1.00E+00 | -0.64 | 8.43E-02 | 6.22E-01 |
| AP5M1             | -0.06 | 8.01E-01 | 1.00E+00 | -0.42 | 8.44E-02 | 6.22E-01 |
| NHLRC2            | -0.12 | 6.74E-01 | 1.00E+00 | -0.50 | 8.44E-02 | 6.22E-01 |
| GP5M1             | 0.01  | 9.74E-01 | 1.00E+00 | 1.20  | 8.44E-02 | 6.22E-01 |
| TOB1-AS1          | 0.21  | 7.43E-01 | 1.00E+00 | -0.84 | 8.44E-02 | 6.22E-01 |
| <b>HMGB1P14</b>   | NA    | NA       | NA       | -2.51 | 8.44E-02 | 6.22E-01 |
| SLC35F2           | -0.01 | 9.71E-01 | 1.00E+00 | -0.43 | 8.44E-02 | 6.22E-01 |
| EIF3D             | -0.17 | 4.76E-01 | 1.00E+00 | 0.32  | 8.45E-02 | 6.22E-01 |
| RPL39P40          | 0.98  | 3.46E-01 | 1.00E+00 | -2.46 | 8.45E-02 | 6.22E-01 |
| <b>AC090198.1</b> | 0.46  | 2.61E-01 | 1.00E+00 | 1.05  | 8.45E-02 | 6.22E-01 |

|                    |       |          |          |       |          |          |
|--------------------|-------|----------|----------|-------|----------|----------|
| <b>LPAL2</b>       | -0.25 | 6.01E-01 | 1.00E+00 | 1.05  | 8.45E-02 | 6.22E-01 |
| <b>NECAB1</b>      | -0.37 | 4.40E-01 | 1.00E+00 | -0.92 | 8.45E-02 | 6.22E-01 |
| <b>FCAR</b>        | 0.38  | 9.14E-01 | 1.00E+00 | 2.33  | 8.45E-02 | 6.22E-01 |
| <b>RIDA</b>        | 0.23  | 3.72E-01 | 1.00E+00 | -0.71 | 8.45E-02 | 6.22E-01 |
| <b>FEN1</b>        | -0.31 | 8.46E-02 | 1.00E+00 | 0.33  | 8.45E-02 | 6.22E-01 |
| <b>ZC4H2</b>       | -0.06 | 8.40E-01 | 1.00E+00 | 0.62  | 8.46E-02 | 6.22E-01 |
| <b>MS4A7</b>       | 0.71  | 6.91E-02 | 1.00E+00 | 0.90  | 8.46E-02 | 6.22E-01 |
| <b>VWDE</b>        | -0.69 | 4.48E-01 | 1.00E+00 | -2.57 | 8.47E-02 | 6.22E-01 |
| <b>POLD3</b>       | -0.17 | 2.84E-01 | 1.00E+00 | 0.26  | 8.47E-02 | 6.22E-01 |
| <b>CAP1</b>        | -0.17 | 2.99E-01 | 1.00E+00 | 0.34  | 8.48E-02 | 6.22E-01 |
| <b>DUOXA2</b>      | 0.43  | 5.79E-01 | 1.00E+00 | 2.77  | 8.48E-02 | 6.22E-01 |
| <b>XLOC_003433</b> | 2.65  | 1.07E-01 | 1.00E+00 | 1.87  | 8.48E-02 | 6.22E-01 |
| <b>SRF</b>         | -0.04 | 8.24E-01 | 1.00E+00 | 1.10  | 8.49E-02 | 6.22E-01 |
| <b>CES1</b>        | 1.35  | 2.39E-02 | 9.18E-01 | -1.26 | 8.49E-02 | 6.22E-01 |
| <b>IRF3</b>        | -0.27 | 3.37E-01 | 1.00E+00 | 0.48  | 8.49E-02 | 6.23E-01 |
| <b>CCDC126</b>     | 0.34  | 3.55E-01 | 1.00E+00 | -0.78 | 8.50E-02 | 6.23E-01 |
| <b>MFF</b>         | -0.01 | 9.40E-01 | 1.00E+00 | -0.40 | 8.50E-02 | 6.23E-01 |
| <b>PAPLN</b>       | 0.49  | 2.64E-01 | 1.00E+00 | 1.03  | 8.50E-02 | 6.23E-01 |
| <b>GLS</b>         | 0.31  | 5.25E-01 | 1.00E+00 | -0.66 | 8.50E-02 | 6.23E-01 |
| <b>WNT5A-AS1</b>   | -0.98 | 1.96E-01 | 1.00E+00 | 2.79  | 8.51E-02 | 6.23E-01 |
| <b>SRSF8</b>       | 0.11  | 5.80E-01 | 1.00E+00 | -0.51 | 8.51E-02 | 6.23E-01 |
| <b>AL021068.2</b>  | NA    | NA       | NA       | 2.57  | 8.51E-02 | 6.23E-01 |
| <b>XLOC_008102</b> | 0.90  | 7.96E-01 | 1.00E+00 | -1.96 | 8.51E-02 | 6.23E-01 |
| <b>AL158151.1</b>  | -0.33 | 7.45E-01 | 1.00E+00 | 1.56  | 8.51E-02 | 6.23E-01 |
| <b>NBPF10</b>      | -0.34 | 4.99E-01 | 1.00E+00 | 0.72  | 8.53E-02 | 6.23E-01 |
| <b>CALM3</b>       | 0.08  | 7.76E-01 | 1.00E+00 | 0.51  | 8.53E-02 | 6.23E-01 |
| <b>GLUD1</b>       | 0.11  | 5.48E-01 | 1.00E+00 | -0.62 | 8.53E-02 | 6.23E-01 |
| <b>DLX6-AS1</b>    | 0.08  | 9.12E-01 | 1.00E+00 | -1.20 | 8.54E-02 | 6.23E-01 |
| <b>BAG6</b>        | -0.11 | 5.75E-01 | 1.00E+00 | 0.81  | 8.54E-02 | 6.23E-01 |
| <b>AC105101.1</b>  | -0.97 | 7.80E-01 | 1.00E+00 | 2.22  | 8.54E-02 | 6.23E-01 |
| <b>FRY-AS1</b>     | 0.39  | 9.10E-01 | 1.00E+00 | -2.50 | 8.54E-02 | 6.23E-01 |
| <b>AP000924.1</b>  | -1.38 | 2.80E-01 | 1.00E+00 | 1.86  | 8.55E-02 | 6.23E-01 |

|                    |        |          |          |       |          |          |
|--------------------|--------|----------|----------|-------|----------|----------|
| <b>AL360012.1</b>  | 1.54   | 2.56E-01 | 1.00E+00 | -1.47 | 8.55E-02 | 6.23E-01 |
| <b>MYADM</b>       | 0.15   | 5.51E-01 | 1.00E+00 | 0.64  | 8.55E-02 | 6.23E-01 |
| <b>G33836</b>      | 0.68   | 5.76E-01 | 1.00E+00 | -1.83 | 8.55E-02 | 6.23E-01 |
| <b>NDUFAF6</b>     | -0.06  | 7.90E-01 | 1.00E+00 | -0.50 | 8.55E-02 | 6.23E-01 |
| <b>FGD4</b>        | 0.16   | 5.17E-01 | 1.00E+00 | -0.45 | 8.55E-02 | 6.23E-01 |
| <b>XLOC_001453</b> | -0.60  | 8.31E-01 | 1.00E+00 | -1.83 | 8.56E-02 | 6.23E-01 |
| <b>KIF13B</b>      | 0.12   | 6.06E-01 | 1.00E+00 | 0.81  | 8.56E-02 | 6.23E-01 |
| <b>PHYH</b>        | 0.29   | 2.59E-01 | 1.00E+00 | -0.62 | 8.56E-02 | 6.23E-01 |
| <b>NSD3</b>        | -0.03  | 8.58E-01 | 1.00E+00 | -0.31 | 8.57E-02 | 6.23E-01 |
| <b>G25345</b>      | 1.68   | 3.05E-01 | 1.00E+00 | 1.94  | 8.57E-02 | 6.23E-01 |
| <b>FES</b>         | -0.12  | 7.59E-01 | 1.00E+00 | 0.76  | 8.57E-02 | 6.23E-01 |
| <b>AL109936.2</b>  | 0.41   | 6.63E-01 | 1.00E+00 | -1.24 | 8.58E-02 | 6.23E-01 |
| <b>PCBP1</b>       | -0.23  | 2.40E-01 | 1.00E+00 | 0.67  | 8.58E-02 | 6.23E-01 |
| <b>ATP5MGL</b>     | 0.74   | 8.29E-01 | 1.00E+00 | -1.56 | 8.58E-02 | 6.23E-01 |
| <b>MEG3</b>        | -0.49  | 5.10E-01 | 1.00E+00 | 1.11  | 8.59E-02 | 6.24E-01 |
| <b>TTC3</b>        | 0.28   | 3.45E-01 | 1.00E+00 | -0.37 | 8.59E-02 | 6.24E-01 |
| <b>C2orf76</b>     | 0.19   | 3.78E-01 | 1.00E+00 | -0.85 | 8.59E-02 | 6.24E-01 |
| <b>TRO</b>         | 0.31   | 5.71E-01 | 1.00E+00 | 0.80  | 8.60E-02 | 6.24E-01 |
| <b>CA1</b>         | 0.53   | 8.29E-01 | 1.00E+00 | -2.88 | 8.61E-02 | 6.24E-01 |
| <b>MTERF2</b>      | 1.01   | 5.21E-03 | 4.20E-01 | -0.74 | 8.61E-02 | 6.24E-01 |
| <b>AC002056.1</b>  | 1.02   | 7.67E-01 | 1.00E+00 | -1.14 | 8.61E-02 | 6.24E-01 |
| <b>FAM225B</b>     | 0.72   | 4.90E-01 | 1.00E+00 | 2.11  | 8.61E-02 | 6.24E-01 |
| <b>SLC25A17</b>    | 0.12   | 5.22E-01 | 1.00E+00 | -0.47 | 8.61E-02 | 6.24E-01 |
| <b>SMCR8</b>       | -0.01  | 9.76E-01 | 1.00E+00 | 0.90  | 8.62E-02 | 6.24E-01 |
| <b>COQ9</b>        | 0.01   | 9.69E-01 | 1.00E+00 | -0.31 | 8.62E-02 | 6.24E-01 |
| <b>WASF2</b>       | 0.07   | 7.83E-01 | 1.00E+00 | 0.34  | 8.63E-02 | 6.24E-01 |
| <b>AC114760.2</b>  | -1.05  | 6.29E-01 | 1.00E+00 | 1.31  | 8.63E-02 | 6.24E-01 |
| <b>PCA3</b>        | -1.51  | 6.54E-01 | 1.00E+00 | -1.87 | 8.63E-02 | 6.24E-01 |
| <b>SHD</b>         | -10.98 | 1.34E-03 | 1.97E-01 | 3.64  | 8.63E-02 | 6.24E-01 |
| <b>RNU6-2</b>      | -0.56  | 7.39E-01 | 1.00E+00 | -1.25 | 8.65E-02 | 6.25E-01 |
| <b>LRRC20</b>      | -0.38  | 1.27E-01 | 1.00E+00 | 1.04  | 8.65E-02 | 6.25E-01 |
| <b>AL590705.1</b>  | -1.63  | 6.33E-01 | 1.00E+00 | -2.24 | 8.67E-02 | 6.26E-01 |

|                   |       |          |          |       |          |          |
|-------------------|-------|----------|----------|-------|----------|----------|
| <b>AC067852.3</b> | -1.41 | 4.69E-01 | 1.00E+00 | 1.91  | 8.67E-02 | 6.26E-01 |
| <b>SLC37A2</b>    | 0.17  | 7.54E-01 | 1.00E+00 | 0.75  | 8.67E-02 | 6.26E-01 |
| <b>CRISPLD2</b>   | 0.25  | 5.05E-01 | 1.00E+00 | 0.90  | 8.67E-02 | 6.26E-01 |
| <b>CTHRC1</b>     | 0.79  | 1.80E-01 | 1.00E+00 | 0.99  | 8.68E-02 | 6.26E-01 |
| <b>RAB24</b>      | -0.15 | 7.11E-01 | 1.00E+00 | 0.70  | 8.68E-02 | 6.26E-01 |
| <b>AC012358.2</b> | -0.18 | 7.68E-01 | 1.00E+00 | 0.62  | 8.68E-02 | 6.26E-01 |
| <b>SPNS3</b>      | 0.16  | 7.99E-01 | 1.00E+00 | 0.91  | 8.69E-02 | 6.26E-01 |
| <b>FASTKD1</b>    | 0.14  | 6.58E-01 | 1.00E+00 | -0.37 | 8.69E-02 | 6.26E-01 |
| <b>RNF215</b>     | 0.26  | 5.72E-01 | 1.00E+00 | 1.63  | 8.69E-02 | 6.26E-01 |
| <b>LINC-PINT</b>  | 0.12  | 8.19E-01 | 1.00E+00 | -0.65 | 8.69E-02 | 6.26E-01 |
| <b>AL583856.2</b> | -0.88 | 5.68E-01 | 1.00E+00 | -1.91 | 8.69E-02 | 6.26E-01 |
| <b>LILRA4</b>     | -3.54 | 2.26E-03 | 2.41E-01 | 2.11  | 8.70E-02 | 6.26E-01 |
| <b>FRAT2</b>      | -0.17 | 6.12E-01 | 1.00E+00 | -0.94 | 8.70E-02 | 6.26E-01 |
| <b>CDK11A</b>     | -0.51 | 6.67E-01 | 1.00E+00 | 1.03  | 8.70E-02 | 6.26E-01 |
| <b>TBC1D10A</b>   | 0.28  | 3.14E-01 | 1.00E+00 | 0.33  | 8.70E-02 | 6.26E-01 |
| <b>VSIG4</b>      | 0.31  | 5.56E-01 | 1.00E+00 | 1.12  | 8.72E-02 | 6.27E-01 |
| <b>CREB3L2</b>    | 0.13  | 7.37E-01 | 1.00E+00 | 0.61  | 8.73E-02 | 6.27E-01 |
| <b>RIMBP2</b>     | -0.76 | 5.10E-02 | 1.00E+00 | 1.18  | 8.73E-02 | 6.27E-01 |
| <b>TSPAN12</b>    | 0.56  | 3.98E-01 | 1.00E+00 | -0.84 | 8.73E-02 | 6.27E-01 |
| <b>PROX2</b>      | -2.20 | 1.99E-01 | 1.00E+00 | 3.28  | 8.73E-02 | 6.27E-01 |
| <b>SHOX2</b>      | 0.38  | 3.74E-01 | 1.00E+00 | 0.93  | 8.74E-02 | 6.27E-01 |
| <b>EBPL</b>       | -0.28 | 2.58E-01 | 1.00E+00 | -1.02 | 8.74E-02 | 6.27E-01 |
| <b>DGCR8</b>      | -0.31 | 2.27E-01 | 1.00E+00 | 0.68  | 8.74E-02 | 6.27E-01 |
| <b>ANAPC10</b>    | -0.03 | 9.34E-01 | 1.00E+00 | -0.89 | 8.74E-02 | 6.27E-01 |
| <b>BCAP29</b>     | 0.15  | 4.32E-01 | 1.00E+00 | -0.48 | 8.75E-02 | 6.28E-01 |
| <b>MICB</b>       | -0.01 | 9.80E-01 | 1.00E+00 | 1.46  | 8.76E-02 | 6.28E-01 |
| <b>CORT</b>       | -1.29 | 5.61E-01 | 1.00E+00 | -1.91 | 8.76E-02 | 6.28E-01 |
| <b>MT1H</b>       | -0.05 | 9.56E-01 | 1.00E+00 | -1.44 | 8.76E-02 | 6.28E-01 |
| <b>CDC42SE1</b>   | -0.26 | 3.58E-01 | 1.00E+00 | 0.92  | 8.76E-02 | 6.28E-01 |
| <b>APIP</b>       | 0.30  | 3.74E-01 | 1.00E+00 | -0.48 | 8.76E-02 | 6.28E-01 |
| <b>COX10-AS1</b>  | -0.07 | 8.42E-01 | 1.00E+00 | -0.56 | 8.77E-02 | 6.28E-01 |
| <b>OS9</b>        | 0.01  | 9.61E-01 | 1.00E+00 | 0.39  | 8.77E-02 | 6.28E-01 |



|                   |       |          |          |       |          |          |
|-------------------|-------|----------|----------|-------|----------|----------|
| <b>CHST15</b>     | -0.01 | 9.75E-01 | 1.00E+00 | 0.72  | 8.77E-02 | 6.28E-01 |
| <b>TCF3P1</b>     | -2.85 | 2.17E-01 | 1.00E+00 | 2.81  | 8.78E-02 | 6.28E-01 |
| <b>UBA6-AS1</b>   | 0.26  | 5.63E-01 | 1.00E+00 | -0.47 | 8.79E-02 | 6.28E-01 |
| <b>ABCB10</b>     | 0.37  | 2.33E-01 | 1.00E+00 | -0.84 | 8.79E-02 | 6.28E-01 |
| <b>IGLV5-37</b>   | NA    | NA       | NA       | 5.40  | 8.79E-02 | 6.28E-01 |
| <b>HLA-DRA</b>    | -0.51 | 1.52E-01 | 1.00E+00 | 0.77  | 8.80E-02 | 6.28E-01 |
| <b>AP003555.2</b> | 0.05  | 9.81E-01 | 1.00E+00 | 1.47  | 8.80E-02 | 6.28E-01 |
| <b>CCDC157</b>    | 0.01  | 9.89E-01 | 1.00E+00 | 0.72  | 8.80E-02 | 6.28E-01 |
| <b>IL23A</b>      | -1.26 | 1.75E-01 | 1.00E+00 | 1.26  | 8.80E-02 | 6.28E-01 |
| <b>WDR66</b>      | -0.36 | 4.60E-01 | 1.00E+00 | 1.17  | 8.81E-02 | 6.28E-01 |
| <b>RBBP9</b>      | -0.35 | 1.30E-01 | 1.00E+00 | -0.46 | 8.81E-02 | 6.28E-01 |
| <b>PEX5L</b>      | -1.22 | 7.11E-01 | 1.00E+00 | 2.26  | 8.81E-02 | 6.28E-01 |
| <b>RAB26</b>      | -1.01 | 3.00E-02 | 9.97E-01 | -1.10 | 8.81E-02 | 6.28E-01 |
| <b>GAL3ST2</b>    | -2.29 | 1.91E-01 | 1.00E+00 | 2.15  | 8.81E-02 | 6.28E-01 |
| <b>GATD3B</b>     | -1.32 | 5.06E-01 | 1.00E+00 | 1.45  | 8.81E-02 | 6.28E-01 |
| <b>FPR1</b>       | 0.12  | 8.53E-01 | 1.00E+00 | 1.63  | 8.82E-02 | 6.29E-01 |
| <b>TMEM222</b>    | -0.04 | 8.84E-01 | 1.00E+00 | 0.25  | 8.83E-02 | 6.29E-01 |
| <b>KMO</b>        | 0.21  | 8.11E-01 | 1.00E+00 | 2.17  | 8.83E-02 | 6.29E-01 |
| <b>AC243964.2</b> | 0.72  | 4.65E-01 | 1.00E+00 | -1.31 | 8.83E-02 | 6.29E-01 |
| <b>AP000766.1</b> | -0.45 | 3.74E-01 | 1.00E+00 | -0.93 | 8.83E-02 | 6.29E-01 |
| <b>COX14</b>      | 0.41  | 1.33E-01 | 1.00E+00 | -0.71 | 8.84E-02 | 6.29E-01 |
| <b>KLHL30</b>     | 1.62  | 4.95E-02 | 1.00E+00 | 1.25  | 8.84E-02 | 6.29E-01 |
| <b>LHPP</b>       | -0.10 | 7.09E-01 | 1.00E+00 | 0.28  | 8.84E-02 | 6.29E-01 |
| <b>C5orf24</b>    | 0.24  | 4.30E-01 | 1.00E+00 | -0.36 | 8.86E-02 | 6.30E-01 |
| <b>AC064805.1</b> | -2.61 | 4.36E-01 | 1.00E+00 | 1.81  | 8.86E-02 | 6.30E-01 |
| <b>SCGN</b>       | -0.13 | 9.69E-01 | 1.00E+00 | -2.70 | 8.86E-02 | 6.30E-01 |
| <b>GPAT2</b>      | -1.05 | 1.56E-01 | 1.00E+00 | -1.12 | 8.86E-02 | 6.30E-01 |
| <b>G34083</b>     | -0.05 | 9.88E-01 | 1.00E+00 | 2.32  | 8.87E-02 | 6.30E-01 |
| <b>SLCO2B1</b>    | 0.24  | 5.33E-01 | 1.00E+00 | 1.19  | 8.87E-02 | 6.30E-01 |
| <b>WDR5B</b>      | 0.30  | 4.73E-01 | 1.00E+00 | -0.58 | 8.88E-02 | 6.30E-01 |
| <b>ZSCAN5A</b>    | -0.17 | 5.48E-01 | 1.00E+00 | -0.46 | 8.88E-02 | 6.30E-01 |
| <b>ARIH2</b>      | 0.04  | 8.15E-01 | 1.00E+00 | 0.25  | 8.88E-02 | 6.30E-01 |

|                    |       |          |          |       |          |          |
|--------------------|-------|----------|----------|-------|----------|----------|
| <b>COL4A3</b>      | -1.84 | 6.72E-02 | 1.00E+00 | 1.64  | 8.88E-02 | 6.30E-01 |
| <b>TRGC2</b>       | 0.54  | 5.92E-01 | 1.00E+00 | 1.97  | 8.89E-02 | 6.30E-01 |
| <b>AL645939.5</b>  | -0.13 | 8.54E-01 | 1.00E+00 | 1.03  | 8.89E-02 | 6.30E-01 |
| <b>G6PD</b>        | -0.21 | 4.47E-01 | 1.00E+00 | 0.80  | 8.90E-02 | 6.30E-01 |
| <b>DENR</b>        | -0.03 | 8.93E-01 | 1.00E+00 | -0.33 | 8.90E-02 | 6.30E-01 |
| <b>AC007342.1</b>  | 1.72  | 4.77E-01 | 1.00E+00 | 2.12  | 8.90E-02 | 6.30E-01 |
| <b>TMEM219</b>     | 0.03  | 8.83E-01 | 1.00E+00 | -0.37 | 8.90E-02 | 6.30E-01 |
| <b>DHRS11</b>      | -0.11 | 7.40E-01 | 1.00E+00 | -1.14 | 8.91E-02 | 6.30E-01 |
| <b>AL445490.1</b>  | 1.72  | 2.26E-01 | 1.00E+00 | 2.46  | 8.91E-02 | 6.30E-01 |
| <b>KCNG1</b>       | -1.10 | 4.89E-02 | 1.00E+00 | 1.41  | 8.91E-02 | 6.30E-01 |
| <b>ARHGDI1</b>     | -0.32 | 1.13E-01 | 1.00E+00 | 0.72  | 8.91E-02 | 6.30E-01 |
| <b>ROPN1</b>       | 0.76  | 4.70E-01 | 1.00E+00 | -1.00 | 8.91E-02 | 6.30E-01 |
| <b>KBTBD6</b>      | 0.30  | 3.19E-01 | 1.00E+00 | -0.50 | 8.92E-02 | 6.30E-01 |
| <b>ADAMTS6</b>     | 1.07  | 2.67E-01 | 1.00E+00 | 1.16  | 8.92E-02 | 6.30E-01 |
| <b>SNORA59B</b>    | -0.80 | 8.18E-01 | 1.00E+00 | -1.96 | 8.92E-02 | 6.30E-01 |
| <b>AC006299.1</b>  | 0.20  | 8.99E-01 | 1.00E+00 | -1.64 | 8.92E-02 | 6.30E-01 |
| <b>YWHAG</b>       | 0.18  | 5.15E-01 | 1.00E+00 | 0.78  | 8.93E-02 | 6.30E-01 |
| <b>CTNS</b>        | -0.19 | 3.83E-01 | 1.00E+00 | 0.52  | 8.93E-02 | 6.30E-01 |
| <b>AC026770.1</b>  | NA    | NA       | NA       | -3.45 | 8.93E-02 | 6.30E-01 |
| <b>HBD</b>         | 2.36  | 2.27E-01 | 1.00E+00 | 2.01  | 8.93E-02 | 6.30E-01 |
| <b>EGLN1</b>       | 0.05  | 8.39E-01 | 1.00E+00 | -0.67 | 8.93E-02 | 6.30E-01 |
| <b>USP30-AS1</b>   | -1.04 | 7.63E-01 | 1.00E+00 | 1.34  | 8.93E-02 | 6.30E-01 |
| <b>NQO1</b>        | 0.87  | 2.04E-01 | 1.00E+00 | -0.89 | 8.95E-02 | 6.30E-01 |
| <b>THRB-IT1</b>    | 1.40  | 4.55E-01 | 1.00E+00 | 1.17  | 8.95E-02 | 6.30E-01 |
| <b>G43485</b>      | -1.83 | 9.79E-02 | 1.00E+00 | -1.90 | 8.95E-02 | 6.30E-01 |
| <b>SCP2</b>        | 0.01  | 9.48E-01 | 1.00E+00 | -0.54 | 8.97E-02 | 6.32E-01 |
| <b>GFI1</b>        | 0.30  | 6.93E-01 | 1.00E+00 | 2.69  | 8.98E-02 | 6.32E-01 |
| <b>CYP2S1</b>      | 0.32  | 2.55E-01 | 1.00E+00 | 0.91  | 8.98E-02 | 6.32E-01 |
| <b>AC011477.7</b>  | -0.18 | 8.79E-01 | 1.00E+00 | 2.12  | 8.98E-02 | 6.32E-01 |
| <b>XLOC_003422</b> | -0.28 | 6.43E-01 | 1.00E+00 | 1.27  | 8.98E-02 | 6.32E-01 |
| <b>AL357078.3</b>  | -0.63 | 8.55E-01 | 1.00E+00 | 2.36  | 8.99E-02 | 6.32E-01 |
| <b>LGI3</b>        | -0.74 | 6.36E-02 | 1.00E+00 | -1.34 | 9.00E-02 | 6.32E-01 |

|                   |       |          |          |       |          |          |
|-------------------|-------|----------|----------|-------|----------|----------|
| <b>BMT2</b>       | 0.12  | 7.23E-01 | 1.00E+00 | -0.31 | 9.00E-02 | 6.32E-01 |
| <b>G17366</b>     | 0.04  | 9.82E-01 | 1.00E+00 | 3.37  | 9.00E-02 | 6.32E-01 |
| <b>AC087783.2</b> | NA    | NA       | NA       | -3.62 | 9.00E-02 | 6.32E-01 |
| <b>OTOAP1</b>     | 1.18  | 6.06E-01 | 1.00E+00 | 1.70  | 9.00E-02 | 6.32E-01 |
| <b>ZFAND3</b>     | -0.19 | 4.39E-01 | 1.00E+00 | 0.88  | 9.00E-02 | 6.32E-01 |
| <b>STXBP2</b>     | 0.01  | 9.85E-01 | 1.00E+00 | 0.63  | 9.01E-02 | 6.32E-01 |
| <b>PLEKHM1P1</b>  | -0.28 | 3.83E-01 | 1.00E+00 | 0.52  | 9.02E-02 | 6.32E-01 |
| <b>AP001207.3</b> | 0.17  | 7.58E-01 | 1.00E+00 | -1.10 | 9.02E-02 | 6.32E-01 |
| <b>G38114</b>     | -2.96 | 4.82E-02 | 1.00E+00 | 1.46  | 9.02E-02 | 6.32E-01 |
| <b>AC040160.1</b> | -1.05 | 4.50E-02 | 1.00E+00 | 0.74  | 9.03E-02 | 6.32E-01 |
| <b>GDI1</b>       | 0.04  | 8.25E-01 | 1.00E+00 | 0.30  | 9.03E-02 | 6.32E-01 |
| <b>NPM1P25</b>    | -0.30 | 5.23E-01 | 1.00E+00 | 1.06  | 9.03E-02 | 6.32E-01 |
| <b>CCDC102B</b>   | -0.63 | 1.67E-01 | 1.00E+00 | 0.88  | 9.04E-02 | 6.32E-01 |
| <b>STEAP3</b>     | -0.78 | 7.06E-03 | 5.12E-01 | 0.83  | 9.04E-02 | 6.32E-01 |
| <b>AC010226.1</b> | -0.23 | 7.46E-01 | 1.00E+00 | -0.87 | 9.04E-02 | 6.32E-01 |
| <b>UQCRC2</b>     | -0.05 | 8.01E-01 | 1.00E+00 | -0.19 | 9.04E-02 | 6.32E-01 |
| <b>CYP8B1</b>     | -1.18 | 4.21E-01 | 1.00E+00 | 1.88  | 9.04E-02 | 6.32E-01 |
| <b>AC027013.1</b> | 3.37  | 3.10E-01 | 1.00E+00 | -2.95 | 9.05E-02 | 6.32E-01 |
| <b>CPA6</b>       | -2.17 | 5.23E-01 | 1.00E+00 | 2.53  | 9.05E-02 | 6.32E-01 |
| <b>CBWD2</b>      | -0.05 | 7.85E-01 | 1.00E+00 | -0.38 | 9.05E-02 | 6.32E-01 |
| <b>TCEANC</b>     | 0.61  | 1.22E-01 | 1.00E+00 | -0.50 | 9.05E-02 | 6.32E-01 |
| <b>DMAC1</b>      | 0.21  | 2.98E-01 | 1.00E+00 | -0.46 | 9.05E-02 | 6.32E-01 |
| <b>MAGOH</b>      | -0.26 | 2.37E-01 | 1.00E+00 | 0.46  | 9.05E-02 | 6.32E-01 |
| <b>PCP2</b>       | 2.54  | 1.62E-01 | 1.00E+00 | -1.62 | 9.06E-02 | 6.32E-01 |
| <b>C14orf39</b>   | 0.90  | 7.96E-01 | 1.00E+00 | -1.79 | 9.06E-02 | 6.32E-01 |
| <b>SH2B3</b>      | 0.07  | 8.49E-01 | 1.00E+00 | 1.18  | 9.07E-02 | 6.32E-01 |
| <b>PCDHGA10</b>   | -0.62 | 6.51E-02 | 1.00E+00 | 0.42  | 9.07E-02 | 6.32E-01 |
| <b>AP004782.1</b> | -2.03 | 4.40E-01 | 1.00E+00 | -2.82 | 9.07E-02 | 6.32E-01 |
| <b>ARAP1</b>      | -0.01 | 9.72E-01 | 1.00E+00 | 0.92  | 9.07E-02 | 6.32E-01 |
| <b>MCHR1</b>      | -0.70 | 1.49E-01 | 1.00E+00 | 1.84  | 9.07E-02 | 6.32E-01 |
| <b>LGALS9C</b>    | -1.89 | 2.54E-01 | 1.00E+00 | 1.48  | 9.08E-02 | 6.32E-01 |
| <b>CR1</b>        | 0.37  | 6.78E-01 | 1.00E+00 | 1.89  | 9.08E-02 | 6.32E-01 |

|             |       |          |          |       |          |          |
|-------------|-------|----------|----------|-------|----------|----------|
| WDSUB1      | -0.24 | 4.50E-01 | 1.00E+00 | -0.48 | 9.08E-02 | 6.32E-01 |
| CCK         | -2.71 | 2.41E-02 | 9.18E-01 | 1.39  | 9.09E-02 | 6.32E-01 |
| ZNF528      | 0.58  | 1.24E-01 | 1.00E+00 | -0.40 | 9.09E-02 | 6.32E-01 |
| PRR12       | -0.52 | 8.82E-02 | 1.00E+00 | 1.36  | 9.09E-02 | 6.32E-01 |
| KCNIP4      | -0.55 | 3.06E-01 | 1.00E+00 | -0.85 | 9.09E-02 | 6.32E-01 |
| AL121772.3  | 0.20  | 8.13E-01 | 1.00E+00 | 2.07  | 9.09E-02 | 6.32E-01 |
| BAG1        | -0.02 | 9.14E-01 | 1.00E+00 | -0.66 | 9.10E-02 | 6.32E-01 |
| XLOC_004517 | 4.89  | 4.51E-04 | 9.15E-02 | -2.00 | 9.10E-02 | 6.32E-01 |
| RNU5D-1     | -0.83 | 6.98E-01 | 1.00E+00 | -1.62 | 9.10E-02 | 6.32E-01 |
| LINC02591   | -0.53 | 1.02E-01 | 1.00E+00 | 0.87  | 9.10E-02 | 6.32E-01 |
| SMN2        | -1.02 | 3.57E-01 | 1.00E+00 | -1.04 | 9.11E-02 | 6.32E-01 |
| LARP4P      | 0.56  | 8.71E-01 | 1.00E+00 | -1.99 | 9.11E-02 | 6.32E-01 |
| CDKN2C      | 0.67  | 9.31E-02 | 1.00E+00 | -0.79 | 9.11E-02 | 6.32E-01 |
| MMP7        | 0.23  | 6.85E-01 | 1.00E+00 | 0.90  | 9.11E-02 | 6.32E-01 |
| AC092135.1  | 1.13  | 7.36E-01 | 1.00E+00 | 2.93  | 9.11E-02 | 6.32E-01 |
| CABIN1      | -0.31 | 2.52E-01 | 1.00E+00 | 1.02  | 9.11E-02 | 6.32E-01 |
| ATG101      | -0.11 | 6.60E-01 | 1.00E+00 | 0.41  | 9.12E-02 | 6.32E-01 |
| G34419      | 1.78  | 4.08E-01 | 1.00E+00 | -2.37 | 9.12E-02 | 6.32E-01 |
| TIAF1       | 0.14  | 8.12E-01 | 1.00E+00 | 1.19  | 9.12E-02 | 6.32E-01 |
| GOLGA6L5P   | 0.45  | 6.55E-01 | 1.00E+00 | 1.28  | 9.13E-02 | 6.32E-01 |
| PDGFB       | -0.14 | 7.39E-01 | 1.00E+00 | 1.03  | 9.13E-02 | 6.32E-01 |
| AC110994.2  | -1.26 | 7.16E-01 | 1.00E+00 | -1.10 | 9.13E-02 | 6.32E-01 |
| TCEAL3      | -0.09 | 7.61E-01 | 1.00E+00 | 0.45  | 9.14E-02 | 6.32E-01 |
| ZNF26       | 0.22  | 4.32E-01 | 1.00E+00 | 0.37  | 9.14E-02 | 6.32E-01 |
| DMD         | 0.01  | 9.61E-01 | 1.00E+00 | -0.42 | 9.14E-02 | 6.32E-01 |
| TBC1D2      | -0.16 | 6.33E-01 | 1.00E+00 | 0.68  | 9.14E-02 | 6.32E-01 |
| ZNF213-AS1  | -0.44 | 7.46E-02 | 1.00E+00 | -0.55 | 9.15E-02 | 6.32E-01 |
| ZC3HAV1     | 0.21  | 4.35E-01 | 1.00E+00 | 0.31  | 9.16E-02 | 6.33E-01 |
| DDX43       | 0.11  | 9.09E-01 | 1.00E+00 | -1.47 | 9.16E-02 | 6.33E-01 |
| AL160314.2  | 2.88  | 9.46E-02 | 1.00E+00 | -2.38 | 9.17E-02 | 6.33E-01 |
| C4orf19     | 0.46  | 5.39E-01 | 1.00E+00 | -0.83 | 9.17E-02 | 6.33E-01 |
| TSPAN6      | 0.41  | 3.48E-01 | 1.00E+00 | -0.61 | 9.18E-02 | 6.33E-01 |

|                    |       |          |          |       |          |          |
|--------------------|-------|----------|----------|-------|----------|----------|
| <b>NPFFR1</b>      | -0.41 | 4.74E-01 | 1.00E+00 | 1.93  | 9.18E-02 | 6.33E-01 |
| <b>FAM117A</b>     | 0.03  | 9.12E-01 | 1.00E+00 | -0.72 | 9.18E-02 | 6.33E-01 |
| <b>HLX</b>         | 0.12  | 7.34E-01 | 1.00E+00 | 0.85  | 9.19E-02 | 6.33E-01 |
| <b>MIF4GD</b>      | -0.14 | 4.53E-01 | 1.00E+00 | -0.24 | 9.19E-02 | 6.33E-01 |
| <b>AC025154.2</b>  | -0.16 | 8.86E-01 | 1.00E+00 | -1.22 | 9.19E-02 | 6.33E-01 |
| <b>SMARCB1</b>     | -0.28 | 1.03E-01 | 1.00E+00 | 0.30  | 9.20E-02 | 6.34E-01 |
| <b>FBXL8</b>       | -0.87 | 1.89E-02 | 8.62E-01 | 0.42  | 9.20E-02 | 6.34E-01 |
| <b>G8412</b>       | -0.58 | 3.79E-01 | 1.00E+00 | 1.07  | 9.22E-02 | 6.35E-01 |
| <b>RPL28</b>       | -0.20 | 3.26E-01 | 1.00E+00 | 0.80  | 9.22E-02 | 6.35E-01 |
| <b>EVI5</b>        | 0.41  | 6.62E-02 | 1.00E+00 | -0.50 | 9.23E-02 | 6.35E-01 |
| <b>TP53TG5</b>     | -0.14 | 8.72E-01 | 1.00E+00 | 1.52  | 9.23E-02 | 6.35E-01 |
| <b>FDX1</b>        | 0.16  | 5.01E-01 | 1.00E+00 | -0.84 | 9.23E-02 | 6.35E-01 |
| <b>FAM167A-AS1</b> | 1.01  | 3.64E-01 | 1.00E+00 | -1.78 | 9.24E-02 | 6.35E-01 |
| <b>TPH1</b>        | 1.78  | 2.54E-01 | 1.00E+00 | -1.62 | 9.24E-02 | 6.35E-01 |
| <b>INO80E</b>      | -0.14 | 5.82E-01 | 1.00E+00 | 0.77  | 9.24E-02 | 6.35E-01 |
| <b>TPRKB</b>       | 0.11  | 6.46E-01 | 1.00E+00 | -0.61 | 9.25E-02 | 6.35E-01 |
| <b>C2orf50</b>     | -1.89 | 3.08E-01 | 1.00E+00 | -1.62 | 9.25E-02 | 6.35E-01 |
| <b>C11orf24</b>    | -0.34 | 2.42E-01 | 1.00E+00 | 0.39  | 9.25E-02 | 6.35E-01 |
| <b>LINC01011</b>   | 0.55  | 2.53E-01 | 1.00E+00 | -0.99 | 9.26E-02 | 6.35E-01 |
| <b>G15458</b>      | -0.62 | 6.52E-01 | 1.00E+00 | -2.35 | 9.26E-02 | 6.35E-01 |
| <b>ISM2</b>        | 1.23  | 5.13E-01 | 1.00E+00 | 2.20  | 9.26E-02 | 6.35E-01 |
| <b>AC015799.1</b>  | -0.21 | 9.51E-01 | 1.00E+00 | 2.44  | 9.27E-02 | 6.35E-01 |
| <b>THNSL1</b>      | 0.07  | 8.75E-01 | 1.00E+00 | -0.75 | 9.28E-02 | 6.36E-01 |
| <b>BOLA3</b>       | -0.17 | 6.33E-01 | 1.00E+00 | -0.61 | 9.28E-02 | 6.36E-01 |
| <b>OTUD7B</b>      | -0.03 | 9.14E-01 | 1.00E+00 | 0.72  | 9.29E-02 | 6.37E-01 |
| <b>FDFT1</b>       | -0.25 | 3.24E-01 | 1.00E+00 | -0.48 | 9.30E-02 | 6.37E-01 |
| <b>IER3</b>        | -1.31 | 1.83E-02 | 8.50E-01 | 0.87  | 9.30E-02 | 6.37E-01 |
| <b>SEC61A2</b>     | -0.35 | 3.82E-01 | 1.00E+00 | -0.79 | 9.31E-02 | 6.37E-01 |
| <b>THCAT158</b>    | -0.54 | 5.67E-01 | 1.00E+00 | 1.63  | 9.31E-02 | 6.37E-01 |
| <b>SSH2</b>        | 0.20  | 4.07E-01 | 1.00E+00 | 0.45  | 9.31E-02 | 6.37E-01 |
| <b>OR7E94P</b>     | -0.29 | 7.91E-01 | 1.00E+00 | -2.70 | 9.31E-02 | 6.37E-01 |
| <b>LACRT</b>       | -1.43 | 3.02E-01 | 1.00E+00 | -1.81 | 9.31E-02 | 6.37E-01 |

|                    |       |          |          |       |          |          |
|--------------------|-------|----------|----------|-------|----------|----------|
| <b>GAPDHP52</b>    | -2.49 | 2.14E-01 | 1.00E+00 | 2.94  | 9.32E-02 | 6.37E-01 |
| <b>DCAF10</b>      | -0.01 | 9.71E-01 | 1.00E+00 | -0.48 | 9.32E-02 | 6.37E-01 |
| <b>DPP6</b>        | -1.36 | 1.05E-02 | 6.35E-01 | -1.17 | 9.32E-02 | 6.37E-01 |
| <b>WNT7A</b>       | -1.38 | 1.55E-03 | 2.18E-01 | 1.28  | 9.34E-02 | 6.38E-01 |
| <b>AP001528.1</b>  | 3.15  | 7.48E-02 | 1.00E+00 | -1.61 | 9.34E-02 | 6.38E-01 |
| <b>G27754</b>      | 0.29  | 7.47E-01 | 1.00E+00 | -1.26 | 9.34E-02 | 6.38E-01 |
| <b>HDAC7</b>       | 0.18  | 4.61E-01 | 1.00E+00 | 0.80  | 9.36E-02 | 6.38E-01 |
| <b>HSD17B14</b>    | 0.00  | 9.97E-01 | 1.00E+00 | 0.76  | 9.36E-02 | 6.38E-01 |
| <b>COL13A1</b>     | -0.31 | 4.89E-01 | 1.00E+00 | 1.04  | 9.36E-02 | 6.38E-01 |
| <b>CDK4</b>        | -0.05 | 7.64E-01 | 1.00E+00 | 0.24  | 9.37E-02 | 6.38E-01 |
| <b>RFXANK</b>      | -0.14 | 4.62E-01 | 1.00E+00 | 0.29  | 9.37E-02 | 6.38E-01 |
| <b>XLOC_005458</b> | 0.19  | 9.23E-01 | 1.00E+00 | 2.07  | 9.37E-02 | 6.38E-01 |
| <b>HTRA3</b>       | 0.88  | 8.31E-02 | 1.00E+00 | 1.24  | 9.37E-02 | 6.38E-01 |
| <b>PUSL1</b>       | -0.14 | 6.66E-01 | 1.00E+00 | 0.42  | 9.37E-02 | 6.38E-01 |
| <b>AC026801.2</b>  | 1.20  | 6.35E-02 | 1.00E+00 | 1.06  | 9.38E-02 | 6.38E-01 |
| <b>AQP11</b>       | 0.23  | 7.98E-01 | 1.00E+00 | -1.24 | 9.38E-02 | 6.38E-01 |
| <b>COMMD5</b>      | 0.22  | 3.77E-01 | 1.00E+00 | 0.31  | 9.39E-02 | 6.39E-01 |
| <b>WDR82P2</b>     | -1.41 | 5.26E-01 | 1.00E+00 | -2.33 | 9.39E-02 | 6.39E-01 |
| <b>EIF2AK2</b>     | 0.32  | 5.05E-01 | 1.00E+00 | 0.63  | 9.40E-02 | 6.39E-01 |
| <b>ADGRL1</b>      | -0.12 | 6.86E-01 | 1.00E+00 | 0.83  | 9.40E-02 | 6.39E-01 |
| <b>XLOC_003378</b> | -0.96 | 5.45E-01 | 1.00E+00 | 1.83  | 9.40E-02 | 6.39E-01 |
| <b>TCL1A</b>       | -0.06 | 9.86E-01 | 1.00E+00 | 2.67  | 9.41E-02 | 6.39E-01 |
| <b>AC104819.1</b>  | 0.56  | 8.71E-01 | 1.00E+00 | -3.43 | 9.42E-02 | 6.39E-01 |
| <b>NLRC4</b>       | -0.64 | 4.44E-01 | 1.00E+00 | 1.61  | 9.42E-02 | 6.39E-01 |
| <b>CCL8</b>        | -0.74 | 2.60E-01 | 1.00E+00 | 1.33  | 9.42E-02 | 6.39E-01 |
| <b>GTPBP2</b>      | -0.01 | 9.58E-01 | 1.00E+00 | 1.14  | 9.42E-02 | 6.39E-01 |
| <b>FBXO36</b>      | -0.09 | 7.17E-01 | 1.00E+00 | -0.66 | 9.42E-02 | 6.40E-01 |
| <b>ROPN1B</b>      | 0.32  | 6.92E-01 | 1.00E+00 | -1.01 | 9.43E-02 | 6.40E-01 |
| <b>ARL14EP</b>     | 0.23  | 3.30E-01 | 1.00E+00 | -0.47 | 9.43E-02 | 6.40E-01 |
| <b>PES1</b>        | -0.12 | 5.97E-01 | 1.00E+00 | 0.38  | 9.44E-02 | 6.40E-01 |
| <b>ZNF480</b>      | -0.02 | 9.43E-01 | 1.00E+00 | -0.43 | 9.45E-02 | 6.41E-01 |
| <b>TRAF4</b>       | -0.34 | 3.31E-01 | 1.00E+00 | 0.84  | 9.46E-02 | 6.41E-01 |

|                     |       |          |          |       |          |          |
|---------------------|-------|----------|----------|-------|----------|----------|
| <b>AGBL3</b>        | -0.24 | 5.91E-01 | 1.00E+00 | -0.63 | 9.47E-02 | 6.41E-01 |
| <b>LINC00603</b>    | -0.46 | 8.94E-01 | 1.00E+00 | 2.17  | 9.47E-02 | 6.42E-01 |
| <b>RPL10P7</b>      | -2.75 | 4.09E-01 | 1.00E+00 | 1.95  | 9.48E-02 | 6.42E-01 |
| <b>ATP2A2</b>       | -0.24 | 2.06E-01 | 1.00E+00 | 0.90  | 9.48E-02 | 6.42E-01 |
| <b>PTGES3</b>       | 0.03  | 8.47E-01 | 1.00E+00 | -0.22 | 9.48E-02 | 6.42E-01 |
| <b>MTCO2P12</b>     | -0.71 | 6.35E-01 | 1.00E+00 | -1.21 | 9.48E-02 | 6.42E-01 |
| <b>ETFRF1</b>       | -0.25 | 3.88E-01 | 1.00E+00 | -0.64 | 9.49E-02 | 6.42E-01 |
| <b>NOSIP</b>        | -0.02 | 8.96E-01 | 1.00E+00 | 0.41  | 9.49E-02 | 6.42E-01 |
| <b>SLCO4C1</b>      | -0.55 | 5.28E-01 | 1.00E+00 | -2.09 | 9.49E-02 | 6.42E-01 |
| <b>KBTBD3</b>       | 0.14  | 6.44E-01 | 1.00E+00 | -0.82 | 9.49E-02 | 6.42E-01 |
| <b>FRYL</b>         | 0.35  | 1.98E-01 | 1.00E+00 | 0.41  | 9.50E-02 | 6.42E-01 |
| <b>SAMD9L</b>       | -0.19 | 7.61E-01 | 1.00E+00 | 1.03  | 9.50E-02 | 6.42E-01 |
| <b>ZHX1-C8orf76</b> | 1.96  | 5.66E-01 | 1.00E+00 | -1.34 | 9.50E-02 | 6.42E-01 |
| <b>BMS1P4</b>       | -2.13 | 2.38E-01 | 1.00E+00 | 1.52  | 9.50E-02 | 6.42E-01 |
| <b>MAST4-AS1</b>    | 0.75  | 2.14E-01 | 1.00E+00 | -0.97 | 9.51E-02 | 6.42E-01 |
| <b>VPS26B</b>       | 0.15  | 5.13E-01 | 1.00E+00 | -0.57 | 9.51E-02 | 6.42E-01 |
| <b>MRPL30</b>       | 0.05  | 8.12E-01 | 1.00E+00 | -0.31 | 9.51E-02 | 6.42E-01 |
| <b>CXorf58</b>      | -0.77 | 5.32E-01 | 1.00E+00 | -2.04 | 9.52E-02 | 6.42E-01 |
| <b>C6orf141</b>     | -0.23 | 6.08E-01 | 1.00E+00 | -0.69 | 9.52E-02 | 6.42E-01 |
| <b>ADAMTSL1</b>     | 0.88  | 1.09E-01 | 1.00E+00 | 1.10  | 9.53E-02 | 6.42E-01 |
| <b>AP000560.1</b>   | -0.07 | 9.24E-01 | 1.00E+00 | -1.10 | 9.54E-02 | 6.42E-01 |
| <b>ADIRF-AS1</b>    | -0.68 | 8.95E-02 | 1.00E+00 | -0.55 | 9.54E-02 | 6.42E-01 |
| <b>XLOC_006677</b>  | 2.77  | 3.25E-01 | 1.00E+00 | 5.18  | 9.54E-02 | 6.42E-01 |
| <b>AC016027.2</b>   | -1.05 | 6.96E-01 | 1.00E+00 | 3.58  | 9.55E-02 | 6.42E-01 |
| <b>UNKL</b>         | 0.04  | 8.96E-01 | 1.00E+00 | 0.45  | 9.55E-02 | 6.42E-01 |
| <b>PRIMPOL</b>      | 0.10  | 7.29E-01 | 1.00E+00 | -0.45 | 9.55E-02 | 6.42E-01 |
| <b>SHROOM2</b>      | -0.13 | 6.64E-01 | 1.00E+00 | 0.71  | 9.56E-02 | 6.42E-01 |
| <b>UQCRFS1</b>      | -0.04 | 8.51E-01 | 1.00E+00 | -0.46 | 9.56E-02 | 6.42E-01 |
| <b>MICU3</b>        | 0.23  | 7.70E-01 | 1.00E+00 | -1.09 | 9.56E-02 | 6.42E-01 |
| <b>ZNF608</b>       | 0.27  | 4.88E-01 | 1.00E+00 | 0.77  | 9.57E-02 | 6.42E-01 |
| <b>Z97192.3</b>     | -1.25 | 7.16E-01 | 1.00E+00 | 2.04  | 9.57E-02 | 6.42E-01 |
| <b>LINC01214</b>    | 1.89  | 1.13E-01 | 1.00E+00 | 1.08  | 9.57E-02 | 6.42E-01 |

|                    |       |          |          |       |          |          |
|--------------------|-------|----------|----------|-------|----------|----------|
| <b>AC138207.4</b>  | 0.32  | 7.56E-01 | 1.00E+00 | 1.01  | 9.57E-02 | 6.42E-01 |
| <b>G35278</b>      | -0.24 | 7.37E-01 | 1.00E+00 | -1.17 | 9.57E-02 | 6.42E-01 |
| <b>CYP4Z1</b>      | 1.88  | 4.15E-01 | 1.00E+00 | 1.95  | 9.58E-02 | 6.42E-01 |
| <b>GPR1</b>        | -0.02 | 9.67E-01 | 1.00E+00 | 0.72  | 9.58E-02 | 6.42E-01 |
| <b>ECHDC2</b>      | 0.03  | 9.03E-01 | 1.00E+00 | -0.37 | 9.58E-02 | 6.42E-01 |
| <b>XLOC_000398</b> | 0.27  | 7.57E-01 | 1.00E+00 | 0.68  | 9.58E-02 | 6.42E-01 |
| <b>AC093909.1</b>  | -0.52 | 4.36E-01 | 1.00E+00 | -0.62 | 9.59E-02 | 6.42E-01 |
| <b>G18355</b>      | 1.25  | 1.49E-01 | 1.00E+00 | -1.53 | 9.59E-02 | 6.42E-01 |
| <b>RCAN1</b>       | 0.20  | 4.48E-01 | 1.00E+00 | -0.35 | 9.59E-02 | 6.42E-01 |
| <b>CPO</b>         | 1.29  | 4.10E-01 | 1.00E+00 | -2.44 | 9.59E-02 | 6.42E-01 |
| <b>G18793</b>      | -0.52 | 6.94E-01 | 1.00E+00 | 1.46  | 9.59E-02 | 6.42E-01 |
| <b>TMCC1-AS1</b>   | 0.54  | 4.98E-01 | 1.00E+00 | 1.13  | 9.60E-02 | 6.42E-01 |
| <b>A2ML1</b>       | 0.41  | 4.21E-01 | 1.00E+00 | 1.20  | 9.60E-02 | 6.42E-01 |
| <b>ASAP1</b>       | -0.31 | 1.51E-01 | 1.00E+00 | 0.60  | 9.60E-02 | 6.42E-01 |
| <b>SLC22A12</b>    | 3.75  | 2.63E-01 | 1.00E+00 | -3.10 | 9.60E-02 | 6.42E-01 |
| <b>AL162377.1</b>  | -0.22 | 5.61E-01 | 1.00E+00 | -1.05 | 9.61E-02 | 6.42E-01 |
| <b>AL390955.2</b>  | -0.57 | 6.02E-01 | 1.00E+00 | 1.05  | 9.61E-02 | 6.42E-01 |
| <b>AC040169.1</b>  | -0.41 | 4.88E-01 | 1.00E+00 | 0.48  | 9.61E-02 | 6.42E-01 |
| <b>OAS2</b>        | -0.08 | 9.45E-01 | 1.00E+00 | 1.33  | 9.62E-02 | 6.42E-01 |
| <b>ACSM3</b>       | -0.76 | 8.91E-02 | 1.00E+00 | -1.15 | 9.62E-02 | 6.42E-01 |
| <b>CRYAB</b>       | 1.00  | 2.77E-02 | 9.71E-01 | -0.84 | 9.63E-02 | 6.42E-01 |
| <b>FAT4</b>        | 0.48  | 2.36E-01 | 1.00E+00 | 1.07  | 9.63E-02 | 6.42E-01 |
| <b>G4024</b>       | -0.86 | 8.05E-01 | 1.00E+00 | 2.22  | 9.63E-02 | 6.42E-01 |
| <b>MLLT6</b>       | -0.04 | 8.84E-01 | 1.00E+00 | 0.83  | 9.63E-02 | 6.42E-01 |
| <b>PVR</b>         | -0.21 | 3.66E-01 | 1.00E+00 | 0.63  | 9.63E-02 | 6.42E-01 |
| <b>INPP5A</b>      | -0.03 | 9.04E-01 | 1.00E+00 | -1.22 | 9.63E-02 | 6.42E-01 |
| <b>CETN4P</b>      | 0.50  | 6.39E-01 | 1.00E+00 | -1.67 | 9.64E-02 | 6.42E-01 |
| <b>AC126474.2</b>  | 0.13  | 6.75E-01 | 1.00E+00 | 0.69  | 9.64E-02 | 6.42E-01 |
| <b>AC005162.3</b>  | -0.01 | 9.95E-01 | 1.00E+00 | -1.02 | 9.64E-02 | 6.42E-01 |
| <b>HGF</b>         | 0.14  | 7.87E-01 | 1.00E+00 | 1.08  | 9.64E-02 | 6.42E-01 |
| <b>CREBL2</b>      | 0.38  | 6.72E-02 | 1.00E+00 | -0.53 | 9.65E-02 | 6.42E-01 |
| <b>KRT10</b>       | -0.03 | 9.41E-01 | 1.00E+00 | -1.38 | 9.65E-02 | 6.42E-01 |



|                   |       |          |          |       |          |          |
|-------------------|-------|----------|----------|-------|----------|----------|
| <b>BCAM</b>       | -0.15 | 7.22E-01 | 1.00E+00 | 1.12  | 9.65E-02 | 6.42E-01 |
| <b>FLJ20021</b>   | -0.08 | 7.63E-01 | 1.00E+00 | 0.49  | 9.65E-02 | 6.42E-01 |
| <b>CAMKMT</b>     | -0.03 | 9.15E-01 | 1.00E+00 | -0.47 | 9.65E-02 | 6.42E-01 |
| <b>MAP4K1</b>     | -0.40 | 3.60E-01 | 1.00E+00 | 1.25  | 9.65E-02 | 6.42E-01 |
| <b>CKS1B</b>      | 0.01  | 9.25E-01 | 1.00E+00 | -0.44 | 9.65E-02 | 6.42E-01 |
| <b>SLC5A8</b>     | -2.66 | 4.90E-02 | 1.00E+00 | -1.80 | 9.66E-02 | 6.42E-01 |
| <b>IGF1R</b>      | 0.32  | 2.78E-01 | 1.00E+00 | 0.58  | 9.66E-02 | 6.42E-01 |
| <b>FAM157A</b>    | -0.31 | 7.23E-01 | 1.00E+00 | 1.58  | 9.66E-02 | 6.42E-01 |
| <b>IGKV2-24</b>   | 4.24  | 2.06E-01 | 1.00E+00 | 2.61  | 9.66E-02 | 6.42E-01 |
| <b>TACC3</b>      | -0.36 | 2.59E-01 | 1.00E+00 | 0.78  | 9.66E-02 | 6.42E-01 |
| <b>CA9</b>        | 0.19  | 7.01E-01 | 1.00E+00 | 1.15  | 9.67E-02 | 6.42E-01 |
| <b>PPARD</b>      | -0.21 | 3.93E-01 | 1.00E+00 | 0.95  | 9.67E-02 | 6.42E-01 |
| <b>HLA-L</b>      | -0.10 | 9.20E-01 | 1.00E+00 | 0.89  | 9.68E-02 | 6.42E-01 |
| <b>VPS37B</b>     | 0.01  | 9.63E-01 | 1.00E+00 | 0.51  | 9.68E-02 | 6.42E-01 |
| <b>STAU2</b>      | -0.01 | 9.63E-01 | 1.00E+00 | -0.40 | 9.69E-02 | 6.42E-01 |
| <b>AL138756.1</b> | 1.50  | 2.06E-02 | 8.94E-01 | 1.52  | 9.69E-02 | 6.42E-01 |
| <b>EGFR-AS1</b>   | 0.51  | 7.85E-01 | 1.00E+00 | 2.18  | 9.69E-02 | 6.42E-01 |
| <b>ARHGAP17</b>   | -0.11 | 5.91E-01 | 1.00E+00 | 0.46  | 9.70E-02 | 6.42E-01 |
| <b>NDUFB9</b>     | -0.03 | 9.02E-01 | 1.00E+00 | -0.46 | 9.70E-02 | 6.42E-01 |
| <b>KRT18</b>      | 0.07  | 9.29E-01 | 1.00E+00 | -0.93 | 9.70E-02 | 6.42E-01 |
| <b>SPRN</b>       | -0.87 | 5.10E-02 | 1.00E+00 | 1.41  | 9.70E-02 | 6.42E-01 |
| <b>AC103591.3</b> | -2.89 | 3.81E-01 | 1.00E+00 | -1.52 | 9.71E-02 | 6.42E-01 |
| <b>SPON1</b>      | 0.72  | 1.09E-01 | 1.00E+00 | 0.88  | 9.71E-02 | 6.42E-01 |
| <b>WNT4</b>       | -0.31 | 4.22E-01 | 1.00E+00 | -1.04 | 9.71E-02 | 6.43E-01 |
| <b>G40351</b>     | 0.10  | 9.31E-01 | 1.00E+00 | -1.04 | 9.72E-02 | 6.43E-01 |
| <b>AC021078.1</b> | 0.82  | 1.27E-01 | 1.00E+00 | 0.46  | 9.72E-02 | 6.43E-01 |
| <b>GASAL1</b>     | -0.44 | 3.77E-01 | 1.00E+00 | 0.79  | 9.72E-02 | 6.43E-01 |
| <b>AC023794.1</b> | 1.08  | 4.09E-01 | 1.00E+00 | -1.53 | 9.72E-02 | 6.43E-01 |
| <b>ADGRG3</b>     | 1.59  | 1.34E-01 | 1.00E+00 | 1.94  | 9.73E-02 | 6.43E-01 |
| <b>ITGB8</b>      | -0.17 | 5.92E-01 | 1.00E+00 | -0.74 | 9.73E-02 | 6.43E-01 |
| <b>GLB1</b>       | 0.25  | 3.55E-01 | 1.00E+00 | 0.40  | 9.73E-02 | 6.43E-01 |
| <b>RTN4</b>       | 0.13  | 5.90E-01 | 1.00E+00 | -0.60 | 9.73E-02 | 6.43E-01 |

|                    |       |          |          |       |          |          |
|--------------------|-------|----------|----------|-------|----------|----------|
| <b>SERINC3</b>     | 0.33  | 3.98E-02 | 1.00E+00 | -0.32 | 9.74E-02 | 6.43E-01 |
| <b>VLDLR-AS1</b>   | 3.78  | 2.19E-02 | 8.96E-01 | -1.72 | 9.74E-02 | 6.43E-01 |
| <b>CA4</b>         | 2.23  | 1.08E-02 | 6.40E-01 | -1.31 | 9.75E-02 | 6.43E-01 |
| <b>PCGF3</b>       | 0.15  | 5.99E-01 | 1.00E+00 | 0.35  | 9.75E-02 | 6.43E-01 |
| <b>FANCC</b>       | 0.23  | 3.22E-01 | 1.00E+00 | -0.44 | 9.75E-02 | 6.43E-01 |
| <b>SPI1</b>        | -0.54 | 1.69E-01 | 1.00E+00 | 1.60  | 9.75E-02 | 6.43E-01 |
| <b>GLDC</b>        | 0.16  | 8.04E-01 | 1.00E+00 | -1.66 | 9.76E-02 | 6.43E-01 |
| <b>TEKT4P2</b>     | 0.80  | 5.27E-02 | 1.00E+00 | 0.65  | 9.76E-02 | 6.43E-01 |
| <b>CD276</b>       | -0.30 | 3.83E-01 | 1.00E+00 | 0.77  | 9.77E-02 | 6.43E-01 |
| <b>CDKN1B</b>      | 0.16  | 1.94E-01 | 1.00E+00 | 0.74  | 9.78E-02 | 6.43E-01 |
| <b>PSMB4</b>       | -0.01 | 9.53E-01 | 1.00E+00 | 0.44  | 9.78E-02 | 6.43E-01 |
| <b>FGL2</b>        | 0.37  | 4.00E-01 | 1.00E+00 | 0.75  | 9.78E-02 | 6.43E-01 |
| <b>AC009812.4</b>  | 0.81  | 5.11E-01 | 1.00E+00 | 1.65  | 9.78E-02 | 6.43E-01 |
| <b>AP005131.7</b>  | -1.78 | 5.55E-01 | 1.00E+00 | 1.67  | 9.78E-02 | 6.43E-01 |
| <b>AC005291.2</b>  | 0.76  | 8.26E-01 | 1.00E+00 | 2.45  | 9.78E-02 | 6.43E-01 |
| <b>DNAJA2</b>      | -0.01 | 9.73E-01 | 1.00E+00 | -0.20 | 9.79E-02 | 6.43E-01 |
| <b>PDIA4</b>       | 0.01  | 9.46E-01 | 1.00E+00 | 0.37  | 9.79E-02 | 6.43E-01 |
| <b>N4BP2L2-IT2</b> | 1.04  | 3.54E-01 | 1.00E+00 | -1.83 | 9.79E-02 | 6.43E-01 |
| <b>CTGF</b>        | -0.11 | 8.08E-01 | 1.00E+00 | 0.76  | 9.80E-02 | 6.44E-01 |
| <b>SLC6A14</b>     | 0.19  | 6.33E-01 | 1.00E+00 | 0.91  | 9.81E-02 | 6.44E-01 |
| <b>NAA60</b>       | -0.21 | 4.11E-01 | 1.00E+00 | 0.64  | 9.83E-02 | 6.45E-01 |
| <b>ST3GAL5</b>     | 0.55  | 1.21E-01 | 1.00E+00 | 0.64  | 9.83E-02 | 6.45E-01 |
| <b>1-Sep</b>       | -0.06 | 9.03E-01 | 1.00E+00 | 0.82  | 9.83E-02 | 6.45E-01 |
| <b>DUSP14</b>      | -0.21 | 5.87E-01 | 1.00E+00 | 0.47  | 9.83E-02 | 6.45E-01 |
| <b>CRTAM</b>       | 0.26  | 7.62E-01 | 1.00E+00 | 1.56  | 9.84E-02 | 6.45E-01 |
| <b>ZSWIM4</b>      | -0.60 | 9.83E-02 | 1.00E+00 | 1.44  | 9.84E-02 | 6.45E-01 |
| <b>RELL2</b>       | -1.04 | 3.68E-02 | 1.00E+00 | 1.05  | 9.84E-02 | 6.45E-01 |
| <b>UBE2E1</b>      | -0.01 | 9.69E-01 | 1.00E+00 | 0.54  | 9.84E-02 | 6.45E-01 |
| <b>ZCRB1</b>       | -0.07 | 6.77E-01 | 1.00E+00 | -0.34 | 9.84E-02 | 6.45E-01 |
| <b>RGS3</b>        | -0.06 | 8.40E-01 | 1.00E+00 | 0.72  | 9.85E-02 | 6.45E-01 |
| <b>DYRK1A</b>      | 0.03  | 9.03E-01 | 1.00E+00 | 0.61  | 9.85E-02 | 6.45E-01 |
| <b>HPSE2</b>       | 0.40  | 5.19E-01 | 1.00E+00 | -1.10 | 9.85E-02 | 6.45E-01 |

|             |       |          |          |       |          |          |
|-------------|-------|----------|----------|-------|----------|----------|
| SETD1B      | -0.45 | 1.05E-01 | 1.00E+00 | 0.92  | 9.86E-02 | 6.45E-01 |
| TUBA1C      | -0.26 | 4.83E-01 | 1.00E+00 | 0.63  | 9.86E-02 | 6.45E-01 |
| AC000123.3  | 0.24  | 5.92E-01 | 1.00E+00 | 0.99  | 9.86E-02 | 6.45E-01 |
| ARHGFE2     | 0.19  | 7.02E-01 | 1.00E+00 | 1.19  | 9.87E-02 | 6.45E-01 |
| XLOC_009668 | 0.27  | 7.93E-01 | 1.00E+00 | -1.07 | 9.88E-02 | 6.45E-01 |
| RPS12P16    | 2.05  | 5.34E-01 | 1.00E+00 | -2.43 | 9.88E-02 | 6.45E-01 |
| SOAT2       | -1.64 | 3.70E-01 | 1.00E+00 | 1.44  | 9.88E-02 | 6.45E-01 |
| XPNPEP2     | 0.76  | 1.46E-01 | 1.00E+00 | 0.95  | 9.88E-02 | 6.45E-01 |
| OXR1        | 0.20  | 4.29E-01 | 1.00E+00 | -0.38 | 9.88E-02 | 6.45E-01 |
| STRBP       | -0.38 | 6.82E-02 | 1.00E+00 | -0.51 | 9.88E-02 | 6.45E-01 |
| BCO2        | 0.32  | 6.67E-01 | 1.00E+00 | 1.33  | 9.89E-02 | 6.46E-01 |
| MTG2        | 0.09  | 7.20E-01 | 1.00E+00 | 0.42  | 9.90E-02 | 6.46E-01 |
| HIST1H1A    | -0.80 | 8.18E-01 | 1.00E+00 | -1.42 | 9.90E-02 | 6.46E-01 |
| OTUD1       | 0.19  | 5.18E-01 | 1.00E+00 | -0.81 | 9.91E-02 | 6.46E-01 |
| RPL23AP7    | 0.30  | 2.71E-01 | 1.00E+00 | -0.45 | 9.91E-02 | 6.46E-01 |
| TMEM161B    | 0.35  | 1.70E-01 | 1.00E+00 | -0.87 | 9.91E-02 | 6.46E-01 |
| AC011290.1  | -0.34 | 9.20E-01 | 1.00E+00 | 2.33  | 9.91E-02 | 6.46E-01 |
| CLN6        | -0.42 | 1.26E-01 | 1.00E+00 | 0.81  | 9.92E-02 | 6.46E-01 |
| METTL5      | 0.12  | 5.93E-01 | 1.00E+00 | -0.55 | 9.93E-02 | 6.46E-01 |
| APC2        | -0.61 | 2.14E-01 | 1.00E+00 | 1.71  | 9.93E-02 | 6.46E-01 |
| SKI         | -0.21 | 4.50E-01 | 1.00E+00 | 1.39  | 9.93E-02 | 6.47E-01 |
| FRMD4A      | -0.02 | 9.35E-01 | 1.00E+00 | 0.57  | 9.95E-02 | 6.47E-01 |
| TSTD1       | 0.32  | 2.06E-01 | 1.00E+00 | -0.86 | 9.95E-02 | 6.47E-01 |
| PPIAP31     | 0.04  | 9.76E-01 | 1.00E+00 | -0.83 | 9.95E-02 | 6.47E-01 |
| AC012645.1  | -0.67 | 2.15E-01 | 1.00E+00 | -0.62 | 9.95E-02 | 6.47E-01 |
| MPP6        | -0.60 | 6.97E-03 | 5.09E-01 | -0.63 | 9.95E-02 | 6.47E-01 |
| AL121603.2  | -1.27 | 2.21E-02 | 8.96E-01 | -1.06 | 9.95E-02 | 6.47E-01 |
| ADCK5       | -0.28 | 2.92E-01 | 1.00E+00 | 0.46  | 9.96E-02 | 6.47E-01 |
| SCPEP1      | 0.37  | 5.68E-02 | 1.00E+00 | 0.31  | 9.97E-02 | 6.47E-01 |
| KCNH1       | -2.74 | 1.21E-01 | 1.00E+00 | 1.74  | 9.97E-02 | 6.47E-01 |
| OBSCN       | 0.25  | 6.21E-01 | 1.00E+00 | 1.22  | 9.97E-02 | 6.47E-01 |
| AHCY        | -0.22 | 2.65E-01 | 1.00E+00 | 0.40  | 9.97E-02 | 6.47E-01 |

|                    |       |          |          |       |          |          |
|--------------------|-------|----------|----------|-------|----------|----------|
| <b>IGLV2-18</b>    | 1.39  | 6.86E-01 | 1.00E+00 | 4.26  | 9.98E-02 | 6.47E-01 |
| <b>RNF121</b>      | 0.00  | 9.83E-01 | 1.00E+00 | 0.42  | 1.00E-01 | 6.48E-01 |
| <b>SETMAR</b>      | -0.11 | 5.59E-01 | 1.00E+00 | -0.34 | 1.00E-01 | 6.48E-01 |
| <b>PPP1R1A</b>     | 2.86  | 4.20E-02 | 1.00E+00 | -1.60 | 1.00E-01 | 6.48E-01 |
| <b>TC2N</b>        | 0.18  | 4.67E-01 | 1.00E+00 | -0.38 | 1.00E-01 | 6.48E-01 |
| <b>AL592293.1</b>  | -0.17 | 8.62E-01 | 1.00E+00 | -1.07 | 1.00E-01 | 6.48E-01 |
| <b>CDKN2A</b>      | -0.38 | 4.82E-01 | 1.00E+00 | 1.05  | 1.00E-01 | 6.48E-01 |
| <b>ATP2C1</b>      | 0.18  | 3.46E-01 | 1.00E+00 | 0.24  | 1.00E-01 | 6.48E-01 |
| <b>ZNF876P</b>     | -0.69 | 1.72E-01 | 1.00E+00 | -0.91 | 1.00E-01 | 6.48E-01 |
| <b>LINC00665</b>   | 0.00  | 9.91E-01 | 1.00E+00 | -0.59 | 1.00E-01 | 6.48E-01 |
| <b>ACAP2</b>       | -0.04 | 8.72E-01 | 1.00E+00 | -0.26 | 1.00E-01 | 6.48E-01 |
| <b>PCSK1</b>       | 0.37  | 7.43E-01 | 1.00E+00 | 1.68  | 1.00E-01 | 6.49E-01 |
| <b>XLOC_014288</b> | -0.11 | 9.39E-01 | 1.00E+00 | 1.56  | 1.00E-01 | 6.49E-01 |
| <b>NENF</b>        | -0.11 | 6.14E-01 | 1.00E+00 | -1.13 | 1.00E-01 | 6.49E-01 |
| <b>GAB2</b>        | -0.10 | 6.26E-01 | 1.00E+00 | 0.87  | 1.00E-01 | 6.49E-01 |
| <b>AP002505.2</b>  | -2.47 | 3.47E-01 | 1.00E+00 | 2.59  | 1.00E-01 | 6.49E-01 |
| <b>PGPEP1</b>      | 0.47  | 3.72E-01 | 1.00E+00 | 0.67  | 1.01E-01 | 6.49E-01 |
| <b>CTDSP1</b>      | 0.00  | 9.90E-01 | 1.00E+00 | 0.80  | 1.01E-01 | 6.49E-01 |
| <b>KCNG2</b>       | -0.59 | 4.08E-01 | 1.00E+00 | 1.68  | 1.01E-01 | 6.49E-01 |
| <b>RPS9</b>        | -0.23 | 3.85E-01 | 1.00E+00 | 0.55  | 1.01E-01 | 6.49E-01 |
| <b>PPIAP77</b>     | -0.71 | 8.37E-01 | 1.00E+00 | -2.82 | 1.01E-01 | 6.49E-01 |
| <b>LENG9</b>       | 0.20  | 5.26E-01 | 1.00E+00 | 1.82  | 1.01E-01 | 6.49E-01 |
| <b>XLOC_009279</b> | -0.35 | 7.62E-01 | 1.00E+00 | 1.29  | 1.01E-01 | 6.49E-01 |
| <b>AP000525.9</b>  | 0.11  | 9.38E-01 | 1.00E+00 | 1.36  | 1.01E-01 | 6.49E-01 |
| <b>DCN</b>         | 0.86  | 4.68E-02 | 1.00E+00 | 0.73  | 1.01E-01 | 6.49E-01 |
| <b>AGAP6</b>       | -0.35 | 6.87E-01 | 1.00E+00 | 1.17  | 1.01E-01 | 6.49E-01 |
| <b>LRRC28</b>      | -0.02 | 9.20E-01 | 1.00E+00 | -0.37 | 1.01E-01 | 6.49E-01 |
| <b>ENO2</b>        | -0.27 | 6.29E-01 | 1.00E+00 | 0.71  | 1.01E-01 | 6.49E-01 |
| <b>RPE</b>         | 0.17  | 5.25E-01 | 1.00E+00 | -0.32 | 1.01E-01 | 6.49E-01 |
| <b>CORO1B</b>      | -0.03 | 8.92E-01 | 1.00E+00 | 0.52  | 1.01E-01 | 6.49E-01 |
| <b>KLF5</b>        | -0.19 | 6.37E-01 | 1.00E+00 | -0.87 | 1.01E-01 | 6.49E-01 |
| <b>SZT2</b>        | 0.06  | 8.23E-01 | 1.00E+00 | 0.73  | 1.01E-01 | 6.49E-01 |

|                    |       |          |          |       |          |          |
|--------------------|-------|----------|----------|-------|----------|----------|
| <b>C20orf197</b>   | -0.64 | 3.91E-01 | 1.00E+00 | -1.60 | 1.01E-01 | 6.49E-01 |
| <b>C4orf50</b>     | -1.23 | 5.62E-01 | 1.00E+00 | 2.46  | 1.01E-01 | 6.49E-01 |
| <b>Z92544.2</b>    | 0.16  | 7.16E-01 | 1.00E+00 | 1.57  | 1.01E-01 | 6.49E-01 |
| <b>EEF1A1P19</b>   | 0.22  | 7.09E-01 | 1.00E+00 | -0.67 | 1.01E-01 | 6.49E-01 |
| <b>PLSCR1</b>      | 0.47  | 3.75E-01 | 1.00E+00 | 0.74  | 1.01E-01 | 6.49E-01 |
| <b>GRAP2</b>       | 0.49  | 4.26E-01 | 1.00E+00 | 1.17  | 1.01E-01 | 6.49E-01 |
| <b>EDIL3</b>       | 0.03  | 9.12E-01 | 1.00E+00 | -0.65 | 1.01E-01 | 6.49E-01 |
| <b>BMP2</b>        | -0.40 | 3.11E-01 | 1.00E+00 | -1.04 | 1.01E-01 | 6.49E-01 |
| <b>SPATA7</b>      | -0.11 | 6.77E-01 | 1.00E+00 | -0.42 | 1.01E-01 | 6.49E-01 |
| <b>LINC02285</b>   | -0.85 | 8.07E-01 | 1.00E+00 | 1.95  | 1.01E-01 | 6.49E-01 |
| <b>PPA1</b>        | -0.02 | 9.30E-01 | 1.00E+00 | -0.28 | 1.01E-01 | 6.49E-01 |
| <b>XLOC_002552</b> | 2.29  | 2.52E-01 | 1.00E+00 | -1.60 | 1.01E-01 | 6.49E-01 |
| <b>ORC6</b>        | 0.37  | 3.33E-01 | 1.00E+00 | 0.80  | 1.01E-01 | 6.49E-01 |
| <b>ELF1</b>        | -0.11 | 6.53E-01 | 1.00E+00 | 0.29  | 1.01E-01 | 6.49E-01 |
| <b>PCDHGB5</b>     | -0.24 | 2.91E-01 | 1.00E+00 | -0.98 | 1.01E-01 | 6.49E-01 |
| <b>AC099521.2</b>  | 0.05  | 9.64E-01 | 1.00E+00 | 1.83  | 1.01E-01 | 6.49E-01 |
| <b>PCCB</b>        | -0.16 | 4.58E-01 | 1.00E+00 | -0.33 | 1.01E-01 | 6.49E-01 |
| <b>DAPK1</b>       | 0.18  | 6.71E-01 | 1.00E+00 | 0.94  | 1.01E-01 | 6.49E-01 |
| <b>ABRAXAS1</b>    | 0.20  | 4.34E-01 | 1.00E+00 | 0.36  | 1.01E-01 | 6.49E-01 |
| <b>GHRL</b>        | 0.51  | 5.49E-01 | 1.00E+00 | 1.30  | 1.01E-01 | 6.49E-01 |
| <b>AC114811.2</b>  | -1.44 | 1.86E-01 | 1.00E+00 | 1.23  | 1.01E-01 | 6.49E-01 |
| <b>DDX58</b>       | 0.23  | 7.39E-01 | 1.00E+00 | 0.88  | 1.01E-01 | 6.49E-01 |
| <b>IFT122</b>      | -0.16 | 4.04E-01 | 1.00E+00 | -0.43 | 1.02E-01 | 6.50E-01 |
| <b>L3MBTL3</b>     | -0.28 | 2.72E-01 | 1.00E+00 | 0.70  | 1.02E-01 | 6.50E-01 |
| <b>ATN1</b>        | -0.35 | 1.43E-01 | 1.00E+00 | 0.93  | 1.02E-01 | 6.50E-01 |
| <b>AC002543.1</b>  | 1.19  | 5.48E-01 | 1.00E+00 | -1.79 | 1.02E-01 | 6.50E-01 |
| <b>FFAR2</b>       | -0.50 | 3.94E-01 | 1.00E+00 | 1.07  | 1.02E-01 | 6.50E-01 |
| <b>ATRAID</b>      | -0.01 | 9.55E-01 | 1.00E+00 | -0.70 | 1.02E-01 | 6.51E-01 |
| <b>RMND5B</b>      | 0.20  | 3.63E-01 | 1.00E+00 | -0.31 | 1.02E-01 | 6.51E-01 |
| <b>PALMD</b>       | 0.43  | 2.22E-01 | 1.00E+00 | -0.45 | 1.02E-01 | 6.51E-01 |
| <b>LAMA3</b>       | 0.17  | 3.66E-01 | 1.00E+00 | 0.65  | 1.02E-01 | 6.51E-01 |
| <b>SIN3B</b>       | -0.26 | 3.17E-01 | 1.00E+00 | 0.89  | 1.02E-01 | 6.51E-01 |

|             |       |          |          |       |          |          |
|-------------|-------|----------|----------|-------|----------|----------|
| ELF4        | -0.18 | 3.89E-01 | 1.00E+00 | 0.93  | 1.02E-01 | 6.51E-01 |
| SULF2       | -0.10 | 6.42E-01 | 1.00E+00 | 0.87  | 1.02E-01 | 6.51E-01 |
| TDRD9       | -0.10 | 9.15E-01 | 1.00E+00 | 2.11  | 1.02E-01 | 6.51E-01 |
| TSPAN18     | 0.09  | 8.47E-01 | 1.00E+00 | 0.83  | 1.02E-01 | 6.51E-01 |
| LPAR4       | 0.69  | 3.92E-01 | 1.00E+00 | 1.32  | 1.02E-01 | 6.51E-01 |
| AC024267.3  | -1.00 | 6.44E-01 | 1.00E+00 | 2.75  | 1.02E-01 | 6.51E-01 |
| AL450124.1  | -2.64 | 6.35E-03 | 4.78E-01 | -0.91 | 1.02E-01 | 6.51E-01 |
| FAM8A1      | 0.08  | 7.26E-01 | 1.00E+00 | -0.54 | 1.02E-01 | 6.51E-01 |
| EPHA8       | -0.94 | 5.71E-01 | 1.00E+00 | 3.67  | 1.02E-01 | 6.51E-01 |
| ARHGAP33    | -1.09 | 1.47E-03 | 2.09E-01 | 1.74  | 1.02E-01 | 6.51E-01 |
| TEPSIN      | -0.31 | 4.81E-01 | 1.00E+00 | 0.60  | 1.02E-01 | 6.51E-01 |
| RBBP4P2     | NA    | NA       | NA       | 1.23  | 1.02E-01 | 6.51E-01 |
| XLOC_003595 | -0.39 | 8.67E-01 | 1.00E+00 | 2.52  | 1.02E-01 | 6.51E-01 |
| C12orf75    | -0.26 | 4.14E-01 | 1.00E+00 | -0.64 | 1.03E-01 | 6.52E-01 |
| AL161421.1  | -0.74 | 8.09E-02 | 1.00E+00 | -1.19 | 1.03E-01 | 6.52E-01 |
| SLC24A4     | -0.34 | 7.52E-01 | 1.00E+00 | 1.80  | 1.03E-01 | 6.52E-01 |
| TWIST2      | 0.04  | 9.15E-01 | 1.00E+00 | 1.12  | 1.03E-01 | 6.52E-01 |
| KRBA1       | -0.21 | 5.09E-01 | 1.00E+00 | 1.24  | 1.03E-01 | 6.52E-01 |
| CHADL       | -0.61 | 3.46E-02 | 1.00E+00 | -0.84 | 1.03E-01 | 6.52E-01 |
| RHNO1       | -0.16 | 4.12E-01 | 1.00E+00 | -0.45 | 1.03E-01 | 6.52E-01 |
| ABCC6P2     | 2.50  | 2.44E-01 | 1.00E+00 | -1.63 | 1.03E-01 | 6.52E-01 |
| LINC00856   | -3.09 | 2.71E-01 | 1.00E+00 | 1.57  | 1.03E-01 | 6.52E-01 |
| BOK-AS1     | NA    | NA       | NA       | -2.88 | 1.03E-01 | 6.52E-01 |
| WDFY4       | -0.35 | 5.20E-01 | 1.00E+00 | 1.60  | 1.03E-01 | 6.52E-01 |
| SLC16A10    | -0.12 | 8.38E-01 | 1.00E+00 | -0.97 | 1.03E-01 | 6.52E-01 |
| RNF114      | 0.06  | 7.27E-01 | 1.00E+00 | 0.38  | 1.03E-01 | 6.52E-01 |
| G8415       | -2.03 | 2.27E-01 | 1.00E+00 | 2.24  | 1.03E-01 | 6.52E-01 |
| AP3M2       | 0.21  | 4.39E-01 | 1.00E+00 | -0.36 | 1.03E-01 | 6.52E-01 |
| NADK2       | 0.01  | 9.67E-01 | 1.00E+00 | -0.45 | 1.03E-01 | 6.52E-01 |
| LTB         | -1.13 | 5.78E-02 | 1.00E+00 | 1.25  | 1.03E-01 | 6.52E-01 |
| CXCL16      | -0.23 | 4.95E-01 | 1.00E+00 | 0.64  | 1.03E-01 | 6.52E-01 |
| ERICH2      | 0.20  | 8.52E-01 | 1.00E+00 | 1.21  | 1.03E-01 | 6.52E-01 |

|                    |       |          |          |       |          |          |
|--------------------|-------|----------|----------|-------|----------|----------|
| <b>AL450405.1</b>  | 1.08  | 6.73E-02 | 1.00E+00 | 0.92  | 1.03E-01 | 6.52E-01 |
| <b>KCNJ15</b>      | -0.88 | 2.60E-02 | 9.40E-01 | 0.99  | 1.03E-01 | 6.52E-01 |
| <b>PRDM6</b>       | 0.97  | 1.25E-01 | 1.00E+00 | 1.07  | 1.03E-01 | 6.52E-01 |
| <b>AL512329.2</b>  | -1.65 | 1.87E-02 | 8.59E-01 | -1.19 | 1.03E-01 | 6.52E-01 |
| <b>GMFG</b>        | 0.01  | 9.75E-01 | 1.00E+00 | 0.69  | 1.03E-01 | 6.52E-01 |
| <b>LINC00992</b>   | -0.15 | 7.02E-01 | 1.00E+00 | -1.07 | 1.03E-01 | 6.52E-01 |
| <b>INTS4P2</b>     | 0.00  | 9.98E-01 | 1.00E+00 | -0.91 | 1.03E-01 | 6.52E-01 |
| <b>AC138207.6</b>  | -1.78 | 3.90E-01 | 1.00E+00 | 1.44  | 1.03E-01 | 6.52E-01 |
| <b>TMED2</b>       | 0.20  | 2.50E-01 | 1.00E+00 | -0.56 | 1.03E-01 | 6.52E-01 |
| <b>ACTN4</b>       | -0.30 | 1.20E-01 | 1.00E+00 | 0.81  | 1.03E-01 | 6.52E-01 |
| <b>ZNF275</b>      | 0.08  | 8.41E-01 | 1.00E+00 | 0.81  | 1.03E-01 | 6.52E-01 |
| <b>TEKT2</b>       | 0.01  | 9.87E-01 | 1.00E+00 | 1.82  | 1.03E-01 | 6.52E-01 |
| <b>PCED1A</b>      | 0.03  | 8.97E-01 | 1.00E+00 | 0.50  | 1.03E-01 | 6.52E-01 |
| <b>NCSTN</b>       | 0.07  | 7.29E-01 | 1.00E+00 | 0.28  | 1.03E-01 | 6.52E-01 |
| <b>SFTPA1</b>      | NA    | NA       | NA       | 3.13  | 1.04E-01 | 6.52E-01 |
| <b>AL161449.2</b>  | 0.01  | 9.95E-01 | 1.00E+00 | 1.62  | 1.04E-01 | 6.52E-01 |
| <b>NIPSNAP2</b>    | 0.09  | 7.55E-01 | 1.00E+00 | -0.53 | 1.04E-01 | 6.52E-01 |
| <b>ZNF628</b>      | -1.01 | 1.37E-02 | 7.37E-01 | 1.39  | 1.04E-01 | 6.52E-01 |
| <b>ODF2L</b>       | -0.22 | 3.91E-01 | 1.00E+00 | 0.51  | 1.04E-01 | 6.52E-01 |
| <b>DOCK10</b>      | -0.33 | 3.00E-01 | 1.00E+00 | 0.89  | 1.04E-01 | 6.52E-01 |
| <b>XLOC_012700</b> | -0.39 | 6.47E-01 | 1.00E+00 | -1.55 | 1.04E-01 | 6.52E-01 |
| <b>C1orf127</b>    | -1.29 | 4.62E-01 | 1.00E+00 | 2.28  | 1.04E-01 | 6.52E-01 |
| <b>ENTPD7</b>      | 0.12  | 6.04E-01 | 1.00E+00 | 0.79  | 1.04E-01 | 6.52E-01 |
| <b>UPRT</b>        | 0.35  | 2.45E-01 | 1.00E+00 | -0.42 | 1.04E-01 | 6.52E-01 |
| <b>AC097376.2</b>  | -0.28 | 2.81E-01 | 1.00E+00 | -0.53 | 1.04E-01 | 6.52E-01 |
| <b>ATG2A</b>       | -0.11 | 7.26E-01 | 1.00E+00 | 0.91  | 1.04E-01 | 6.52E-01 |
| <b>EP400</b>       | -0.54 | 2.98E-02 | 9.97E-01 | 0.82  | 1.04E-01 | 6.52E-01 |
| <b>HLA-DPA1</b>    | -0.57 | 7.17E-02 | 1.00E+00 | 0.76  | 1.04E-01 | 6.52E-01 |
| <b>XLOC_009207</b> | -2.24 | 1.16E-01 | 1.00E+00 | -1.85 | 1.04E-01 | 6.52E-01 |
| <b>TTC41P</b>      | 1.06  | 4.41E-01 | 1.00E+00 | 1.71  | 1.04E-01 | 6.52E-01 |
| <b>ULK1</b>        | -0.19 | 5.04E-01 | 1.00E+00 | 0.80  | 1.04E-01 | 6.52E-01 |
| <b>DNAJB5</b>      | -0.51 | 2.79E-01 | 1.00E+00 | 0.92  | 1.04E-01 | 6.52E-01 |

|             |       |          |          |       |          |          |
|-------------|-------|----------|----------|-------|----------|----------|
| LINGO3      | -0.98 | 1.69E-01 | 1.00E+00 | 2.26  | 1.04E-01 | 6.52E-01 |
| CDC45       | -0.24 | 5.44E-01 | 1.00E+00 | 0.97  | 1.04E-01 | 6.52E-01 |
| XLOC_011518 | -1.67 | 4.39E-02 | 1.00E+00 | -1.22 | 1.04E-01 | 6.52E-01 |
| MT-ATP6     | 0.07  | 8.80E-01 | 1.00E+00 | -0.55 | 1.04E-01 | 6.52E-01 |
| FAM157C     | 2.83  | 2.99E-01 | 1.00E+00 | 1.45  | 1.04E-01 | 6.52E-01 |
| LINC01801   | 0.05  | 9.37E-01 | 1.00E+00 | 2.12  | 1.04E-01 | 6.52E-01 |
| RBM17P4     | -0.44 | 9.00E-01 | 1.00E+00 | -1.68 | 1.04E-01 | 6.52E-01 |
| AC073073.1  | -2.60 | 2.90E-01 | 1.00E+00 | 1.33  | 1.04E-01 | 6.52E-01 |
| AC087491.1  | 0.17  | 8.07E-01 | 1.00E+00 | -1.20 | 1.04E-01 | 6.52E-01 |
| LINC01907   | -2.60 | 1.95E-02 | 8.74E-01 | 1.42  | 1.04E-01 | 6.52E-01 |
| XLOC_001787 | -0.87 | 7.19E-01 | 1.00E+00 | 1.97  | 1.04E-01 | 6.52E-01 |
| RHOXF1      | 2.95  | 2.39E-01 | 1.00E+00 | -1.92 | 1.04E-01 | 6.52E-01 |
| ABCA11P     | 0.02  | 9.82E-01 | 1.00E+00 | -0.75 | 1.04E-01 | 6.52E-01 |
| TRPV3       | 0.29  | 5.20E-01 | 1.00E+00 | 0.99  | 1.04E-01 | 6.52E-01 |
| MTCH2       | 0.03  | 8.56E-01 | 1.00E+00 | -0.35 | 1.04E-01 | 6.52E-01 |
| ZNF337-AS1  | 0.30  | 6.70E-01 | 1.00E+00 | 0.87  | 1.04E-01 | 6.52E-01 |
| VIP         | -3.47 | 3.41E-02 | 1.00E+00 | -2.13 | 1.04E-01 | 6.52E-01 |
| AP2A2       | 0.05  | 8.06E-01 | 1.00E+00 | 0.68  | 1.04E-01 | 6.52E-01 |
| RAVER2      | -0.37 | 1.71E-01 | 1.00E+00 | -0.54 | 1.04E-01 | 6.52E-01 |
| COL4A2      | -0.07 | 9.13E-01 | 1.00E+00 | 1.36  | 1.05E-01 | 6.53E-01 |
| BRI3        | 0.02  | 9.45E-01 | 1.00E+00 | 0.87  | 1.05E-01 | 6.53E-01 |
| G30965      | 0.25  | 8.32E-01 | 1.00E+00 | 1.90  | 1.05E-01 | 6.53E-01 |
| AC006333.2  | 0.05  | 8.62E-01 | 1.00E+00 | -0.52 | 1.05E-01 | 6.53E-01 |
| ZNF528-AS1  | 0.20  | 6.99E-01 | 1.00E+00 | -0.60 | 1.05E-01 | 6.53E-01 |
| CYREN       | 0.13  | 7.05E-01 | 1.00E+00 | 0.34  | 1.05E-01 | 6.53E-01 |
| CYBC1       | -0.20 | 3.45E-01 | 1.00E+00 | 0.58  | 1.05E-01 | 6.53E-01 |
| TRIM41      | -0.10 | 5.71E-01 | 1.00E+00 | 0.95  | 1.05E-01 | 6.53E-01 |
| OR5K2       | 0.91  | 7.91E-01 | 1.00E+00 | 2.55  | 1.05E-01 | 6.54E-01 |
| TLDC1       | 0.24  | 4.82E-01 | 1.00E+00 | 0.53  | 1.05E-01 | 6.54E-01 |
| MTHFR       | 0.06  | 8.61E-01 | 1.00E+00 | 0.71  | 1.05E-01 | 6.54E-01 |
| TWF2        | 0.08  | 7.00E-01 | 1.00E+00 | 0.37  | 1.05E-01 | 6.54E-01 |
| NSMCE4A     | -0.04 | 8.72E-01 | 1.00E+00 | -0.49 | 1.05E-01 | 6.54E-01 |



|                    |       |          |          |       |          |          |
|--------------------|-------|----------|----------|-------|----------|----------|
| <b>AC092279.2</b>  | 0.18  | 8.82E-01 | 1.00E+00 | 1.44  | 1.05E-01 | 6.54E-01 |
| <b>CADM1</b>       | -0.29 | 1.14E-01 | 1.00E+00 | -0.49 | 1.05E-01 | 6.54E-01 |
| <b>AARD</b>        | 1.84  | 1.13E-02 | 6.59E-01 | 1.19  | 1.05E-01 | 6.54E-01 |
| <b>C1QTNF1-AS1</b> | -0.23 | 8.63E-01 | 1.00E+00 | -1.75 | 1.05E-01 | 6.54E-01 |
| <b>AASDH</b>       | 0.20  | 4.18E-01 | 1.00E+00 | -0.39 | 1.05E-01 | 6.54E-01 |
| <b>TOX3</b>        | 0.11  | 8.92E-01 | 1.00E+00 | -1.29 | 1.05E-01 | 6.54E-01 |
| <b>LSAMP</b>       | -0.18 | 5.99E-01 | 1.00E+00 | 0.74  | 1.05E-01 | 6.54E-01 |
| <b>ZNF232</b>      | -0.02 | 9.46E-01 | 1.00E+00 | -0.36 | 1.05E-01 | 6.55E-01 |
| <b>AL022068.1</b>  | -0.03 | 9.50E-01 | 1.00E+00 | -1.09 | 1.05E-01 | 6.55E-01 |
| <b>ADAMTS10</b>    | 0.45  | 3.39E-01 | 1.00E+00 | 1.68  | 1.05E-01 | 6.55E-01 |
| <b>NFASC</b>       | -0.22 | 4.45E-01 | 1.00E+00 | 0.65  | 1.06E-01 | 6.55E-01 |
| <b>CBX1</b>        | 0.03  | 8.85E-01 | 1.00E+00 | 0.43  | 1.06E-01 | 6.55E-01 |
| <b>KIRREL1</b>     | 0.48  | 3.03E-01 | 1.00E+00 | 1.36  | 1.06E-01 | 6.55E-01 |
| <b>PARP11</b>      | 0.31  | 3.64E-01 | 1.00E+00 | 0.51  | 1.06E-01 | 6.55E-01 |
| <b>TRIM46</b>      | -1.02 | 2.61E-01 | 1.00E+00 | 1.79  | 1.06E-01 | 6.55E-01 |
| <b>G25248</b>      | -2.13 | 3.83E-01 | 1.00E+00 | 1.17  | 1.06E-01 | 6.55E-01 |
| <b>AL157832.1</b>  | 1.18  | 3.85E-01 | 1.00E+00 | 1.82  | 1.06E-01 | 6.55E-01 |
| <b>CEP170</b>      | -0.18 | 5.17E-01 | 1.00E+00 | 0.53  | 1.06E-01 | 6.55E-01 |
| <b>G31717</b>      | -1.29 | 7.00E-02 | 1.00E+00 | -1.70 | 1.06E-01 | 6.55E-01 |
| <b>ELOVL3</b>      | 0.85  | 4.55E-01 | 1.00E+00 | -1.29 | 1.06E-01 | 6.55E-01 |
| <b>LINC00426</b>   | -1.13 | 2.66E-01 | 1.00E+00 | 1.36  | 1.06E-01 | 6.55E-01 |
| <b>AL160171.1</b>  | -1.33 | 6.24E-01 | 1.00E+00 | 1.35  | 1.06E-01 | 6.55E-01 |
| <b>PLOD1</b>       | -0.03 | 9.25E-01 | 1.00E+00 | 0.66  | 1.06E-01 | 6.55E-01 |
| <b>PTGS2</b>       | -1.72 | 2.68E-02 | 9.55E-01 | 1.08  | 1.06E-01 | 6.55E-01 |
| <b>LINC02137</b>   | -0.55 | 8.12E-01 | 1.00E+00 | 1.22  | 1.06E-01 | 6.55E-01 |
| <b>AC138932.3</b>  | -0.41 | 7.25E-01 | 1.00E+00 | -1.11 | 1.06E-01 | 6.55E-01 |
| <b>ORC4</b>        | 0.03  | 8.86E-01 | 1.00E+00 | -0.40 | 1.06E-01 | 6.55E-01 |
| <b>TMEM97</b>      | -0.28 | 4.60E-01 | 1.00E+00 | -0.73 | 1.06E-01 | 6.55E-01 |
| <b>SLC5A4</b>      | 0.36  | 7.65E-01 | 1.00E+00 | 2.18  | 1.06E-01 | 6.55E-01 |
| <b>PFDN4</b>       | 0.10  | 6.94E-01 | 1.00E+00 | -0.67 | 1.06E-01 | 6.55E-01 |
| <b>NDUFAF4</b>     | 0.39  | 2.04E-01 | 1.00E+00 | -0.53 | 1.06E-01 | 6.55E-01 |
| <b>PLGRKT</b>      | -0.41 | 2.07E-02 | 8.94E-01 | -0.55 | 1.06E-01 | 6.55E-01 |

|                    |       |          |          |       |          |          |
|--------------------|-------|----------|----------|-------|----------|----------|
| <b>RNF146</b>      | 0.32  | 7.67E-02 | 1.00E+00 | -0.40 | 1.06E-01 | 6.55E-01 |
| <b>LRR8C-DT</b>    | -0.27 | 5.55E-01 | 1.00E+00 | -0.63 | 1.06E-01 | 6.55E-01 |
| <b>CEL</b>         | -2.22 | 1.55E-02 | 7.75E-01 | -1.87 | 1.06E-01 | 6.55E-01 |
| <b>SLC5A12</b>     | -0.93 | 6.40E-01 | 1.00E+00 | -2.72 | 1.06E-01 | 6.55E-01 |
| <b>CNGA4</b>       | 0.51  | 7.12E-01 | 1.00E+00 | 3.95  | 1.06E-01 | 6.55E-01 |
| <b>CMAHP</b>       | 0.62  | 1.38E-01 | 1.00E+00 | 0.49  | 1.06E-01 | 6.55E-01 |
| <b>DOCK2</b>       | -0.25 | 5.24E-01 | 1.00E+00 | 1.38  | 1.06E-01 | 6.55E-01 |
| <b>AL669831.1</b>  | -0.71 | 3.05E-01 | 1.00E+00 | 1.10  | 1.06E-01 | 6.55E-01 |
| <b>SUMF2</b>       | -0.02 | 8.97E-01 | 1.00E+00 | 0.36  | 1.06E-01 | 6.55E-01 |
| <b>OTUD6B-AS1</b>  | -0.17 | 5.75E-01 | 1.00E+00 | -0.69 | 1.06E-01 | 6.55E-01 |
| <b>KCNMB2</b>      | -0.48 | 8.40E-01 | 1.00E+00 | -2.60 | 1.06E-01 | 6.55E-01 |
| <b>FAAP24</b>      | 0.41  | 2.41E-01 | 1.00E+00 | 0.43  | 1.06E-01 | 6.55E-01 |
| <b>ARR3</b>        | -1.51 | 1.10E-01 | 1.00E+00 | -1.29 | 1.06E-01 | 6.55E-01 |
| <b>KAZALD1</b>     | 0.06  | 9.01E-01 | 1.00E+00 | 0.81  | 1.06E-01 | 6.55E-01 |
| <b>SPN</b>         | -0.98 | 6.72E-02 | 1.00E+00 | 1.01  | 1.06E-01 | 6.55E-01 |
| <b>SNORA66</b>     | 0.43  | 7.59E-01 | 1.00E+00 | 1.12  | 1.06E-01 | 6.55E-01 |
| <b>LINC02391</b>   | -1.67 | 2.55E-01 | 1.00E+00 | -1.11 | 1.07E-01 | 6.55E-01 |
| <b>RARRES3</b>     | -0.29 | 5.68E-01 | 1.00E+00 | 0.77  | 1.07E-01 | 6.56E-01 |
| <b>GBP1P1</b>      | -0.49 | 4.80E-01 | 1.00E+00 | 1.22  | 1.07E-01 | 6.56E-01 |
| <b>TMEM39B</b>     | -0.28 | 1.68E-01 | 1.00E+00 | 0.69  | 1.07E-01 | 6.56E-01 |
| <b>PARP8</b>       | -0.20 | 4.26E-01 | 1.00E+00 | 0.68  | 1.07E-01 | 6.56E-01 |
| <b>MTFP1</b>       | 0.13  | 9.70E-01 | 1.00E+00 | 1.04  | 1.07E-01 | 6.56E-01 |
| <b>FAM241B</b>     | -0.20 | 5.70E-01 | 1.00E+00 | -0.59 | 1.07E-01 | 6.56E-01 |
| <b>LMAN1</b>       | 0.15  | 5.36E-01 | 1.00E+00 | 0.26  | 1.07E-01 | 6.56E-01 |
| <b>SRRD</b>        | -0.04 | 8.26E-01 | 1.00E+00 | -0.88 | 1.07E-01 | 6.56E-01 |
| <b>LINC01979</b>   | -0.17 | 9.41E-01 | 1.00E+00 | 2.08  | 1.07E-01 | 6.56E-01 |
| <b>XLOC_000587</b> | 1.22  | 7.25E-01 | 1.00E+00 | 1.74  | 1.07E-01 | 6.56E-01 |
| <b>RPL22P3</b>     | 2.82  | 2.01E-01 | 1.00E+00 | 1.51  | 1.07E-01 | 6.56E-01 |
| <b>GIMAP6</b>      | 0.42  | 4.58E-01 | 1.00E+00 | 0.81  | 1.07E-01 | 6.56E-01 |
| <b>GLIPR1L2</b>    | -0.57 | 4.39E-01 | 1.00E+00 | -0.94 | 1.07E-01 | 6.57E-01 |
| <b>NCKAP5L</b>     | -0.16 | 6.32E-01 | 1.00E+00 | 1.20  | 1.07E-01 | 6.57E-01 |
| <b>CFHR1</b>       | -0.18 | 9.44E-01 | 1.00E+00 | 1.79  | 1.07E-01 | 6.57E-01 |

|                    |       |          |          |       |          |          |
|--------------------|-------|----------|----------|-------|----------|----------|
| <b>RPA4</b>        | -1.46 | 6.70E-01 | 1.00E+00 | -1.60 | 1.07E-01 | 6.57E-01 |
| <b>HSPA12A</b>     | 0.24  | 5.61E-01 | 1.00E+00 | -0.73 | 1.07E-01 | 6.57E-01 |
| <b>SNAPC3</b>      | -0.02 | 9.19E-01 | 1.00E+00 | -0.38 | 1.07E-01 | 6.57E-01 |
| <b>ZNF496</b>      | -0.22 | 3.49E-01 | 1.00E+00 | 0.89  | 1.07E-01 | 6.57E-01 |
| <b>SLC6A6</b>      | -0.32 | 2.45E-01 | 1.00E+00 | 0.79  | 1.07E-01 | 6.57E-01 |
| <b>WDR62</b>       | -0.16 | 7.08E-01 | 1.00E+00 | 0.88  | 1.07E-01 | 6.57E-01 |
| <b>RAET1G</b>      | -0.16 | 7.89E-01 | 1.00E+00 | 0.69  | 1.07E-01 | 6.57E-01 |
| <b>ACOXL</b>       | -2.22 | 6.55E-02 | 1.00E+00 | 1.95  | 1.07E-01 | 6.57E-01 |
| <b>MMP23A</b>      | -0.55 | 6.84E-01 | 1.00E+00 | 1.65  | 1.08E-01 | 6.57E-01 |
| <b>ENTPD3</b>      | -0.01 | 9.88E-01 | 1.00E+00 | -0.70 | 1.08E-01 | 6.57E-01 |
| <b>NDUFB3</b>      | 0.07  | 6.67E-01 | 1.00E+00 | -0.56 | 1.08E-01 | 6.57E-01 |
| <b>CRTC3-AS1</b>   | -0.40 | 7.26E-01 | 1.00E+00 | 1.23  | 1.08E-01 | 6.57E-01 |
| <b>G13883</b>      | -2.05 | 5.50E-01 | 1.00E+00 | 2.32  | 1.08E-01 | 6.57E-01 |
| <b>DOCK8</b>       | -0.21 | 4.73E-01 | 1.00E+00 | 0.87  | 1.08E-01 | 6.57E-01 |
| <b>XLOC_004879</b> | 0.54  | 7.25E-01 | 1.00E+00 | -2.37 | 1.08E-01 | 6.57E-01 |
| <b>CCNT2-AS1</b>   | -2.78 | 2.94E-02 | 9.91E-01 | 0.84  | 1.08E-01 | 6.57E-01 |
| <b>SS18L1</b>      | -0.06 | 8.46E-01 | 1.00E+00 | 0.51  | 1.08E-01 | 6.57E-01 |
| <b>GPR65</b>       | 0.37  | 6.80E-01 | 1.00E+00 | 1.02  | 1.08E-01 | 6.57E-01 |
| <b>DYRK3</b>       | -0.58 | 9.37E-02 | 1.00E+00 | 0.86  | 1.08E-01 | 6.57E-01 |
| <b>AC018797.2</b>  | 0.21  | 6.68E-01 | 1.00E+00 | -0.70 | 1.08E-01 | 6.57E-01 |
| <b>CIITA</b>       | -0.73 | 9.63E-03 | 6.08E-01 | 1.35  | 1.08E-01 | 6.57E-01 |
| <b>RMDN1</b>       | -0.04 | 8.21E-01 | 1.00E+00 | -0.40 | 1.08E-01 | 6.57E-01 |
| <b>AC003986.3</b>  | 1.86  | 1.66E-01 | 1.00E+00 | -1.35 | 1.08E-01 | 6.57E-01 |
| <b>PP2D1</b>       | -0.19 | 7.86E-01 | 1.00E+00 | -0.88 | 1.08E-01 | 6.57E-01 |
| <b>LINC01374</b>   | 1.32  | 7.00E-01 | 1.00E+00 | 2.27  | 1.08E-01 | 6.57E-01 |
| <b>RANBP3</b>      | -0.16 | 4.33E-01 | 1.00E+00 | 0.71  | 1.08E-01 | 6.57E-01 |
| <b>CD38</b>        | 0.02  | 9.88E-01 | 1.00E+00 | 1.83  | 1.08E-01 | 6.57E-01 |
| <b>GFOD2</b>       | 0.16  | 4.81E-01 | 1.00E+00 | 0.42  | 1.08E-01 | 6.57E-01 |
| <b>ZNF827</b>      | -0.20 | 5.53E-01 | 1.00E+00 | 0.62  | 1.08E-01 | 6.57E-01 |
| <b>XLOC_004196</b> | 0.63  | 7.58E-01 | 1.00E+00 | -2.45 | 1.08E-01 | 6.57E-01 |
| <b>GNPDA1</b>      | 0.02  | 9.38E-01 | 1.00E+00 | 0.25  | 1.08E-01 | 6.57E-01 |
| <b>PPP2R5E</b>     | -0.10 | 6.11E-01 | 1.00E+00 | -0.46 | 1.08E-01 | 6.57E-01 |

|                      |       |          |          |       |          |          |
|----------------------|-------|----------|----------|-------|----------|----------|
| <b>DDX60</b>         | 0.23  | 7.17E-01 | 1.00E+00 | 0.76  | 1.08E-01 | 6.57E-01 |
| <b>PPFIA4</b>        | -0.60 | 3.88E-01 | 1.00E+00 | 1.96  | 1.08E-01 | 6.57E-01 |
| <b>CRYBB1</b>        | -1.65 | 9.58E-02 | 1.00E+00 | 1.28  | 1.08E-01 | 6.57E-01 |
| <b>ATF6B</b>         | -0.29 | 3.45E-01 | 1.00E+00 | 0.86  | 1.08E-01 | 6.57E-01 |
| <b>HSPB11</b>        | 0.08  | 7.20E-01 | 1.00E+00 | -0.61 | 1.08E-01 | 6.57E-01 |
| <b>PPAN</b>          | -0.14 | 7.16E-01 | 1.00E+00 | -0.85 | 1.08E-01 | 6.57E-01 |
| <b>ERCC2</b>         | -0.23 | 3.96E-01 | 1.00E+00 | 0.50  | 1.08E-01 | 6.57E-01 |
| <b>CCNDBP1</b>       | 0.20  | 3.38E-01 | 1.00E+00 | -0.51 | 1.08E-01 | 6.58E-01 |
| <b>SCARA5</b>        | 1.29  | 3.00E-02 | 9.97E-01 | 0.95  | 1.08E-01 | 6.58E-01 |
| <b>AC026367.2</b>    | 0.30  | 8.95E-01 | 1.00E+00 | -2.37 | 1.08E-01 | 6.58E-01 |
| <b>CISD1</b>         | -0.01 | 9.50E-01 | 1.00E+00 | -0.51 | 1.08E-01 | 6.58E-01 |
| <b>HSD11B1</b>       | 0.18  | 7.48E-01 | 1.00E+00 | -0.66 | 1.09E-01 | 6.58E-01 |
| <b>HOXC6</b>         | 0.02  | 9.66E-01 | 1.00E+00 | -1.07 | 1.09E-01 | 6.58E-01 |
| <b>CALCOCO2</b>      | 0.12  | 4.93E-01 | 1.00E+00 | -0.20 | 1.09E-01 | 6.58E-01 |
| <b>GTPBP4</b>        | -0.05 | 8.19E-01 | 1.00E+00 | 0.28  | 1.09E-01 | 6.58E-01 |
| <b>RNVU1-18</b>      | -1.61 | 4.07E-01 | 1.00E+00 | -1.42 | 1.09E-01 | 6.58E-01 |
| <b>AL138762.1</b>    | -2.46 | 1.61E-01 | 1.00E+00 | -1.27 | 1.09E-01 | 6.58E-01 |
| <b>TNRC6A</b>        | -0.03 | 9.20E-01 | 1.00E+00 | 0.57  | 1.09E-01 | 6.58E-01 |
| <b>TMEM92</b>        | 0.16  | 8.76E-01 | 1.00E+00 | 1.49  | 1.09E-01 | 6.58E-01 |
| <b>DENND4B</b>       | -0.07 | 8.30E-01 | 1.00E+00 | 0.97  | 1.09E-01 | 6.58E-01 |
| <b>PCNX2</b>         | -0.11 | 8.11E-01 | 1.00E+00 | 0.88  | 1.09E-01 | 6.58E-01 |
| <b>SIGLEC7</b>       | -2.45 | 1.21E-01 | 1.00E+00 | 1.97  | 1.09E-01 | 6.58E-01 |
| <b>MAPK11</b>        | -0.19 | 6.08E-01 | 1.00E+00 | 1.27  | 1.09E-01 | 6.58E-01 |
| <b>RGL4</b>          | 0.06  | 9.51E-01 | 1.00E+00 | 1.95  | 1.09E-01 | 6.58E-01 |
| <b>TMEM220-AS1</b>   | -0.05 | 9.61E-01 | 1.00E+00 | -1.03 | 1.09E-01 | 6.58E-01 |
| <b>EIF1B</b>         | 0.09  | 6.64E-01 | 1.00E+00 | -0.34 | 1.09E-01 | 6.58E-01 |
| <b>SAT1</b>          | 0.11  | 7.10E-01 | 1.00E+00 | 0.51  | 1.09E-01 | 6.58E-01 |
| <b>CH17-340M24.3</b> | -0.09 | 7.78E-01 | 1.00E+00 | -0.76 | 1.09E-01 | 6.58E-01 |
| <b>EEF1A1P12</b>     | 0.68  | 5.35E-01 | 1.00E+00 | -0.78 | 1.09E-01 | 6.58E-01 |
| <b>TTC13</b>         | -0.38 | 1.32E-01 | 1.00E+00 | -0.56 | 1.09E-01 | 6.58E-01 |
| <b>SIPA1</b>         | -0.18 | 3.78E-01 | 1.00E+00 | 0.68  | 1.09E-01 | 6.58E-01 |
| <b>AC007998.3</b>    | -0.08 | 9.25E-01 | 1.00E+00 | 1.04  | 1.09E-01 | 6.58E-01 |

|                    |       |          |          |       |          |          |
|--------------------|-------|----------|----------|-------|----------|----------|
| <b>G354</b>        | -3.23 | 9.27E-03 | 6.04E-01 | 1.43  | 1.09E-01 | 6.58E-01 |
| <b>RAB1B</b>       | -0.08 | 6.83E-01 | 1.00E+00 | 0.71  | 1.09E-01 | 6.58E-01 |
| <b>XLOC_013474</b> | -0.89 | 2.96E-01 | 1.00E+00 | -1.47 | 1.09E-01 | 6.58E-01 |
| <b>AL137060.1</b>  | -0.66 | 6.63E-01 | 1.00E+00 | 2.09  | 1.09E-01 | 6.58E-01 |
| <b>MISP</b>        | -0.64 | 2.63E-01 | 1.00E+00 | 1.61  | 1.09E-01 | 6.58E-01 |
| <b>CCSAP</b>       | 0.29  | 4.79E-01 | 1.00E+00 | -0.58 | 1.09E-01 | 6.58E-01 |
| <b>RBP5</b>        | -0.75 | 2.76E-01 | 1.00E+00 | 0.96  | 1.09E-01 | 6.58E-01 |
| <b>IKBKGP1</b>     | 0.00  | 9.97E-01 | 1.00E+00 | -0.54 | 1.09E-01 | 6.58E-01 |
| <b>NR2F2</b>       | 0.09  | 8.15E-01 | 1.00E+00 | 0.85  | 1.09E-01 | 6.58E-01 |
| <b>CHD1</b>        | -0.27 | 2.89E-01 | 1.00E+00 | 0.26  | 1.09E-01 | 6.58E-01 |
| <b>CHURC1</b>      | 0.38  | 8.51E-02 | 1.00E+00 | 0.29  | 1.09E-01 | 6.58E-01 |
| <b>CDK19</b>       | 0.32  | 2.20E-01 | 1.00E+00 | 0.49  | 1.09E-01 | 6.58E-01 |
| <b>GMFB</b>        | 0.31  | 2.99E-01 | 1.00E+00 | -0.47 | 1.10E-01 | 6.58E-01 |
| <b>AP001107.3</b>  | -0.79 | 6.00E-01 | 1.00E+00 | 2.25  | 1.10E-01 | 6.58E-01 |
| <b>RFPL1S</b>      | -1.88 | 3.00E-01 | 1.00E+00 | 1.88  | 1.10E-01 | 6.58E-01 |
| <b>MRPS15</b>      | -0.08 | 6.71E-01 | 1.00E+00 | -0.33 | 1.10E-01 | 6.59E-01 |
| <b>CDH4</b>        | 0.19  | 7.09E-01 | 1.00E+00 | -1.28 | 1.10E-01 | 6.59E-01 |
| <b>AC108134.1</b>  | 0.38  | 6.86E-01 | 1.00E+00 | 1.70  | 1.10E-01 | 6.60E-01 |
| <b>AC006033.2</b>  | 1.58  | 3.88E-01 | 1.00E+00 | 2.12  | 1.10E-01 | 6.60E-01 |
| <b>BBS7</b>        | 0.16  | 6.53E-01 | 1.00E+00 | -0.33 | 1.10E-01 | 6.60E-01 |
| <b>AP003071.4</b>  | -0.36 | 6.10E-01 | 1.00E+00 | 1.36  | 1.10E-01 | 6.60E-01 |
| <b>GHITM</b>       | 0.06  | 7.26E-01 | 1.00E+00 | -0.47 | 1.10E-01 | 6.60E-01 |
| <b>HOXA10</b>      | 0.77  | 8.77E-02 | 1.00E+00 | -0.71 | 1.10E-01 | 6.60E-01 |
| <b>TBC1D9</b>      | 0.46  | 3.76E-01 | 1.00E+00 | 0.91  | 1.10E-01 | 6.60E-01 |
| <b>AC091182.2</b>  | 0.69  | 5.74E-01 | 1.00E+00 | 1.24  | 1.10E-01 | 6.60E-01 |
| <b>AC116158.1</b>  | 1.97  | 4.77E-01 | 1.00E+00 | -1.78 | 1.10E-01 | 6.60E-01 |
| <b>XK</b>          | -0.50 | 2.13E-01 | 1.00E+00 | -0.89 | 1.10E-01 | 6.60E-01 |
| <b>UBA52</b>       | -0.10 | 6.10E-01 | 1.00E+00 | 0.36  | 1.10E-01 | 6.60E-01 |
| <b>AC004825.2</b>  | -0.61 | 5.65E-01 | 1.00E+00 | -1.45 | 1.10E-01 | 6.60E-01 |
| <b>NUP88</b>       | -0.01 | 9.69E-01 | 1.00E+00 | -0.33 | 1.10E-01 | 6.60E-01 |
| <b>MUSK</b>        | 1.27  | 1.50E-01 | 1.00E+00 | 1.13  | 1.10E-01 | 6.60E-01 |
| <b>LINC02562</b>   | -0.29 | 5.59E-01 | 1.00E+00 | -1.13 | 1.10E-01 | 6.60E-01 |

|             |       |          |          |       |          |          |
|-------------|-------|----------|----------|-------|----------|----------|
| SERPINE1    | -1.05 | 5.48E-02 | 1.00E+00 | 1.36  | 1.10E-01 | 6.60E-01 |
| LINC02158   | -1.22 | 6.18E-01 | 1.00E+00 | -1.55 | 1.10E-01 | 6.60E-01 |
| FUT9        | -0.62 | 6.16E-01 | 1.00E+00 | -1.80 | 1.11E-01 | 6.60E-01 |
| IER5L       | -0.20 | 5.04E-01 | 1.00E+00 | 1.48  | 1.11E-01 | 6.60E-01 |
| IGFL2-AS1   | -0.87 | 2.00E-01 | 1.00E+00 | -1.10 | 1.11E-01 | 6.60E-01 |
| POLR2M      | 0.58  | 7.23E-02 | 1.00E+00 | -0.35 | 1.11E-01 | 6.60E-01 |
| NUP54       | 0.10  | 5.77E-01 | 1.00E+00 | -0.32 | 1.11E-01 | 6.60E-01 |
| OSBPL9      | 0.10  | 7.11E-01 | 1.00E+00 | -0.35 | 1.11E-01 | 6.60E-01 |
| AC084816.1  | 0.25  | 9.42E-01 | 1.00E+00 | -2.55 | 1.11E-01 | 6.60E-01 |
| AC004471.2  | -0.58 | 6.72E-01 | 1.00E+00 | 1.39  | 1.11E-01 | 6.60E-01 |
| CD8A        | -0.88 | 1.29E-01 | 1.00E+00 | 1.36  | 1.11E-01 | 6.60E-01 |
| FUT11       | 0.36  | 2.98E-01 | 1.00E+00 | 0.53  | 1.11E-01 | 6.60E-01 |
| GIN1        | 0.05  | 8.81E-01 | 1.00E+00 | -0.49 | 1.11E-01 | 6.60E-01 |
| RAB31       | -0.07 | 8.34E-01 | 1.00E+00 | 0.71  | 1.11E-01 | 6.60E-01 |
| FMR1        | 0.15  | 5.45E-01 | 1.00E+00 | -0.41 | 1.11E-01 | 6.60E-01 |
| CYTH1       | 0.04  | 8.40E-01 | 1.00E+00 | 0.52  | 1.11E-01 | 6.60E-01 |
| ST3GAL6     | 0.29  | 4.46E-01 | 1.00E+00 | -0.43 | 1.11E-01 | 6.60E-01 |
| APLP2       | 0.10  | 7.15E-01 | 1.00E+00 | 0.40  | 1.11E-01 | 6.61E-01 |
| AL591069.1  | 0.10  | 9.61E-01 | 1.00E+00 | -1.70 | 1.11E-01 | 6.61E-01 |
| GLULP4      | 1.13  | 7.44E-01 | 1.00E+00 | 1.82  | 1.11E-01 | 6.61E-01 |
| XLOC_009602 | -0.25 | 9.42E-01 | 1.00E+00 | 2.17  | 1.11E-01 | 6.61E-01 |
| AC131235.3  | 0.94  | 7.50E-01 | 1.00E+00 | -1.81 | 1.11E-01 | 6.61E-01 |
| RDH16       | 0.41  | 5.38E-01 | 1.00E+00 | 1.03  | 1.11E-01 | 6.61E-01 |
| JADE2       | -0.03 | 9.12E-01 | 1.00E+00 | 0.91  | 1.11E-01 | 6.61E-01 |
| KCNT1       | 0.14  | 9.08E-01 | 1.00E+00 | 1.92  | 1.11E-01 | 6.61E-01 |
| NOP2        | -2.71 | 3.01E-01 | 1.00E+00 | 0.81  | 1.11E-01 | 6.61E-01 |
| AL357055.3  | -0.01 | 9.93E-01 | 1.00E+00 | -1.25 | 1.11E-01 | 6.61E-01 |
| CHST12      | -0.02 | 9.26E-01 | 1.00E+00 | 0.36  | 1.11E-01 | 6.61E-01 |
| IGLV2-14    | 0.33  | 8.15E-01 | 1.00E+00 | 2.05  | 1.11E-01 | 6.61E-01 |
| HS3ST3B1    | 0.01  | 9.86E-01 | 1.00E+00 | 0.63  | 1.11E-01 | 6.61E-01 |
| FFAR3       | 2.56  | 3.14E-01 | 1.00E+00 | 1.83  | 1.11E-01 | 6.61E-01 |
| ATP12A      | -0.33 | 7.16E-01 | 1.00E+00 | 1.76  | 1.11E-01 | 6.61E-01 |

|             |       |          |          |       |          |          |
|-------------|-------|----------|----------|-------|----------|----------|
| ZBTB20-AS5  | -1.74 | 6.11E-01 | 1.00E+00 | -2.70 | 1.11E-01 | 6.61E-01 |
| MGAT4EP     | -1.97 | 4.73E-01 | 1.00E+00 | 3.56  | 1.11E-01 | 6.61E-01 |
| TUBE1       | 0.31  | 1.90E-01 | 1.00E+00 | -0.54 | 1.11E-01 | 6.61E-01 |
| SNRPF       | -0.05 | 7.79E-01 | 1.00E+00 | -0.49 | 1.11E-01 | 6.61E-01 |
| MFSD6       | 0.00  | 9.88E-01 | 1.00E+00 | -0.64 | 1.11E-01 | 6.61E-01 |
| ALG8        | 0.11  | 6.49E-01 | 1.00E+00 | -0.51 | 1.12E-01 | 6.61E-01 |
| RBM43       | 0.00  | 9.96E-01 | 1.00E+00 | 0.50  | 1.12E-01 | 6.61E-01 |
| G33515      | 0.12  | 9.45E-01 | 1.00E+00 | -1.28 | 1.12E-01 | 6.61E-01 |
| RPS16       | -0.01 | 9.80E-01 | 1.00E+00 | 0.49  | 1.12E-01 | 6.61E-01 |
| GEM         | 0.25  | 4.67E-01 | 1.00E+00 | 0.66  | 1.12E-01 | 6.61E-01 |
| AC079684.1  | 1.50  | 4.44E-01 | 1.00E+00 | 2.46  | 1.12E-01 | 6.61E-01 |
| PRKAR1B     | -0.50 | 9.79E-02 | 1.00E+00 | 0.40  | 1.12E-01 | 6.61E-01 |
| ABCD3       | 0.40  | 1.14E-01 | 1.00E+00 | -0.43 | 1.12E-01 | 6.61E-01 |
| AC009948.1  | 0.68  | 5.69E-02 | 1.00E+00 | 0.49  | 1.12E-01 | 6.61E-01 |
| USP12       | 0.22  | 2.75E-01 | 1.00E+00 | -0.56 | 1.12E-01 | 6.61E-01 |
| KDM2A       | -0.10 | 6.67E-01 | 1.00E+00 | 0.70  | 1.12E-01 | 6.61E-01 |
| AC018638.5  | -1.38 | 1.26E-01 | 1.00E+00 | 1.22  | 1.12E-01 | 6.61E-01 |
| SARDH       | 0.10  | 8.33E-01 | 1.00E+00 | 1.28  | 1.12E-01 | 6.62E-01 |
| AL590822.1  | 0.70  | 3.26E-01 | 1.00E+00 | 0.89  | 1.12E-01 | 6.62E-01 |
| AL391422.4  | 0.22  | 6.33E-01 | 1.00E+00 | 1.00  | 1.12E-01 | 6.62E-01 |
| TRAF3       | -0.06 | 8.00E-01 | 1.00E+00 | 0.95  | 1.12E-01 | 6.62E-01 |
| APOO        | -0.11 | 7.33E-01 | 1.00E+00 | -0.40 | 1.12E-01 | 6.62E-01 |
| AC079209.1  | -1.96 | 4.98E-01 | 1.00E+00 | 2.06  | 1.12E-01 | 6.62E-01 |
| CAV3        | -1.31 | 3.57E-01 | 1.00E+00 | 1.99  | 1.12E-01 | 6.62E-01 |
| XLOC_000389 | 1.93  | 1.80E-01 | 1.00E+00 | 0.77  | 1.12E-01 | 6.62E-01 |
| EBAG9       | 0.08  | 6.13E-01 | 1.00E+00 | -0.43 | 1.12E-01 | 6.62E-01 |
| CCR4        | 0.51  | 5.39E-01 | 1.00E+00 | 2.08  | 1.12E-01 | 6.62E-01 |
| GPN2        | -0.16 | 5.12E-01 | 1.00E+00 | 0.29  | 1.12E-01 | 6.62E-01 |
| LINC01578   | -0.08 | 7.79E-01 | 1.00E+00 | -0.69 | 1.12E-01 | 6.62E-01 |
| SLC39A7     | 0.02  | 9.48E-01 | 1.00E+00 | 0.71  | 1.12E-01 | 6.62E-01 |
| TMEM107     | 0.00  | 9.96E-01 | 1.00E+00 | -0.45 | 1.12E-01 | 6.62E-01 |
| TFDP1       | -0.23 | 3.90E-01 | 1.00E+00 | -0.58 | 1.12E-01 | 6.62E-01 |

|                   |       |          |          |       |          |          |
|-------------------|-------|----------|----------|-------|----------|----------|
| <b>CCR8</b>       | -1.44 | 2.45E-01 | 1.00E+00 | 1.45  | 1.12E-01 | 6.62E-01 |
| <b>AC004477.3</b> | -3.56 | 3.75E-03 | 3.33E-01 | -1.23 | 1.12E-01 | 6.62E-01 |
| <b>NUP62</b>      | -0.13 | 4.77E-01 | 1.00E+00 | 0.50  | 1.13E-01 | 6.63E-01 |
| <b>VWC2</b>       | -0.88 | 1.17E-01 | 1.00E+00 | -0.90 | 1.13E-01 | 6.63E-01 |
| <b>G39927</b>     | -1.43 | 3.91E-01 | 1.00E+00 | -2.76 | 1.13E-01 | 6.63E-01 |
| <b>AC243772.2</b> | 0.73  | 3.82E-01 | 1.00E+00 | 2.00  | 1.13E-01 | 6.63E-01 |
| <b>ATF2</b>       | 0.37  | 2.59E-01 | 1.00E+00 | -0.47 | 1.13E-01 | 6.63E-01 |
| <b>CBX8</b>       | -0.16 | 4.73E-01 | 1.00E+00 | 0.60  | 1.13E-01 | 6.63E-01 |
| <b>AL391069.3</b> | NA    | NA       | NA       | -2.07 | 1.13E-01 | 6.63E-01 |
| <b>MEP1B</b>      | -1.78 | 6.06E-01 | 1.00E+00 | -1.52 | 1.13E-01 | 6.63E-01 |
| <b>AL357033.4</b> | -0.22 | 6.52E-01 | 1.00E+00 | 1.13  | 1.13E-01 | 6.63E-01 |
| <b>AC080188.1</b> | -1.28 | 5.58E-01 | 1.00E+00 | 1.86  | 1.13E-01 | 6.63E-01 |
| <b>TMEM200A</b>   | 0.17  | 6.80E-01 | 1.00E+00 | 0.87  | 1.13E-01 | 6.63E-01 |
| <b>TNR</b>        | -4.92 | 8.42E-02 | 1.00E+00 | -0.95 | 1.13E-01 | 6.63E-01 |
| <b>AL590094.1</b> | 0.13  | 7.70E-01 | 1.00E+00 | -0.95 | 1.13E-01 | 6.63E-01 |
| <b>ZNF880</b>     | 0.18  | 5.65E-01 | 1.00E+00 | -0.56 | 1.13E-01 | 6.63E-01 |
| <b>G37087</b>     | -2.69 | 1.26E-01 | 1.00E+00 | 1.48  | 1.13E-01 | 6.63E-01 |
| <b>ZBTB33</b>     | 0.06  | 8.29E-01 | 1.00E+00 | -0.46 | 1.13E-01 | 6.63E-01 |
| <b>C12orf66</b>   | 0.04  | 8.87E-01 | 1.00E+00 | 0.53  | 1.13E-01 | 6.63E-01 |
| <b>RCN2</b>       | 0.09  | 7.04E-01 | 1.00E+00 | -0.58 | 1.13E-01 | 6.63E-01 |
| <b>PRR34</b>      | -0.02 | 9.70E-01 | 1.00E+00 | 1.20  | 1.13E-01 | 6.63E-01 |
| <b>KLHL33</b>     | 1.02  | 1.85E-01 | 1.00E+00 | -2.07 | 1.13E-01 | 6.63E-01 |
| <b>FBP1</b>       | 0.26  | 6.87E-01 | 1.00E+00 | 0.99  | 1.13E-01 | 6.63E-01 |
| <b>MIGA1</b>      | 0.31  | 2.62E-01 | 1.00E+00 | -0.36 | 1.13E-01 | 6.63E-01 |
| <b>AL138955.1</b> | 1.37  | 5.13E-01 | 1.00E+00 | 1.99  | 1.13E-01 | 6.63E-01 |
| <b>SELENON</b>    | -0.13 | 6.63E-01 | 1.00E+00 | 0.87  | 1.13E-01 | 6.63E-01 |
| <b>HEY1</b>       | 0.51  | 3.62E-01 | 1.00E+00 | -0.72 | 1.13E-01 | 6.63E-01 |
| <b>ARHGEF17</b>   | -0.08 | 8.41E-01 | 1.00E+00 | 0.92  | 1.13E-01 | 6.63E-01 |
| <b>ILDR1</b>      | -0.10 | 7.47E-01 | 1.00E+00 | -0.85 | 1.13E-01 | 6.63E-01 |
| <b>TRAV6</b>      | 0.59  | 8.36E-01 | 1.00E+00 | 2.43  | 1.13E-01 | 6.63E-01 |
| <b>SRPK3</b>      | -0.24 | 6.83E-01 | 1.00E+00 | -1.47 | 1.13E-01 | 6.63E-01 |
| <b>TGM2</b>       | 0.85  | 2.91E-01 | 1.00E+00 | 1.51  | 1.14E-01 | 6.63E-01 |



|              |       |          |          |       |          |          |
|--------------|-------|----------|----------|-------|----------|----------|
| MT-CYB       | -0.07 | 8.82E-01 | 1.00E+00 | -0.58 | 1.14E-01 | 6.63E-01 |
| AL513327.1   | -1.49 | 3.49E-01 | 1.00E+00 | 1.26  | 1.14E-01 | 6.63E-01 |
| CD302        | 0.50  | 2.14E-01 | 1.00E+00 | -0.68 | 1.14E-01 | 6.63E-01 |
| KERA         | 1.26  | 4.29E-01 | 1.00E+00 | 2.06  | 1.14E-01 | 6.63E-01 |
| TNF          | -1.03 | 1.66E-01 | 1.00E+00 | 0.86  | 1.14E-01 | 6.63E-01 |
| AC025884.1   | -2.90 | 2.64E-01 | 1.00E+00 | 2.36  | 1.14E-01 | 6.63E-01 |
| C15orf54     | -0.68 | 8.44E-01 | 1.00E+00 | 3.57  | 1.14E-01 | 6.63E-01 |
| CKS1BP3      | 2.39  | 4.11E-02 | 1.00E+00 | -0.87 | 1.14E-01 | 6.63E-01 |
| GMIP         | -0.28 | 2.87E-01 | 1.00E+00 | 1.12  | 1.14E-01 | 6.63E-01 |
| CLEC4A       | 2.25  | 5.07E-01 | 1.00E+00 | 0.86  | 1.14E-01 | 6.63E-01 |
| MIAT         | -2.66 | 8.20E-02 | 1.00E+00 | 1.77  | 1.14E-01 | 6.63E-01 |
| BMS1P10      | 1.05  | 6.27E-02 | 1.00E+00 | -0.86 | 1.14E-01 | 6.63E-01 |
| SVIL2P       | 0.07  | 9.43E-01 | 1.00E+00 | 1.04  | 1.14E-01 | 6.63E-01 |
| LAMC1        | 0.30  | 4.56E-01 | 1.00E+00 | 0.88  | 1.14E-01 | 6.63E-01 |
| AP002387.1   | -0.69 | 2.40E-01 | 1.00E+00 | -0.87 | 1.14E-01 | 6.63E-01 |
| C1orf54      | 0.12  | 8.18E-01 | 1.00E+00 | 0.51  | 1.14E-01 | 6.63E-01 |
| DBIL5P       | 0.22  | 6.57E-01 | 1.00E+00 | -1.04 | 1.14E-01 | 6.63E-01 |
| RBKS         | 0.18  | 6.55E-01 | 1.00E+00 | -0.41 | 1.14E-01 | 6.63E-01 |
| PIM1         | -0.23 | 6.56E-01 | 1.00E+00 | 0.53  | 1.14E-01 | 6.63E-01 |
| ZNF583       | 0.54  | 1.53E-01 | 1.00E+00 | -0.55 | 1.14E-01 | 6.63E-01 |
| AC245128.3   | -1.52 | 6.60E-01 | 1.00E+00 | 2.40  | 1.14E-01 | 6.63E-01 |
| KLF3         | -0.20 | 5.64E-01 | 1.00E+00 | -0.44 | 1.14E-01 | 6.63E-01 |
| ZNF887P      | 0.03  | 9.78E-01 | 1.00E+00 | -1.43 | 1.14E-01 | 6.63E-01 |
| SLC25A30     | 0.41  | 2.37E-01 | 1.00E+00 | 0.57  | 1.14E-01 | 6.63E-01 |
| TMEM39A      | 0.23  | 4.09E-01 | 1.00E+00 | 0.40  | 1.14E-01 | 6.63E-01 |
| GOLIM4       | -0.21 | 5.39E-01 | 1.00E+00 | 0.50  | 1.14E-01 | 6.63E-01 |
| EPC2         | -0.01 | 9.69E-01 | 1.00E+00 | 0.65  | 1.14E-01 | 6.63E-01 |
| LINC02482    | -1.02 | 4.20E-01 | 1.00E+00 | -1.00 | 1.14E-01 | 6.63E-01 |
| SIAH2        | 0.15  | 5.53E-01 | 1.00E+00 | -0.75 | 1.14E-01 | 6.63E-01 |
| RGS1         | -2.62 | 2.83E-02 | 9.75E-01 | 0.87  | 1.14E-01 | 6.63E-01 |
| ZNF276       | -0.45 | 1.06E-01 | 1.00E+00 | 0.78  | 1.14E-01 | 6.63E-01 |
| RP11-640M9.2 | 0.04  | 9.00E-01 | 1.00E+00 | 0.66  | 1.14E-01 | 6.63E-01 |

|                   |       |          |          |       |          |          |
|-------------------|-------|----------|----------|-------|----------|----------|
| <b>LRRC63</b>     | -0.74 | 7.29E-01 | 1.00E+00 | -1.69 | 1.14E-01 | 6.63E-01 |
| <b>UTP14C</b>     | 0.49  | 6.37E-02 | 1.00E+00 | -0.47 | 1.14E-01 | 6.63E-01 |
| <b>MFHAS1</b>     | -0.62 | 9.31E-02 | 1.00E+00 | 0.64  | 1.14E-01 | 6.63E-01 |
| <b>AL031651.2</b> | 0.41  | 8.93E-01 | 1.00E+00 | 2.49  | 1.14E-01 | 6.63E-01 |
| <b>EEF2</b>       | -0.28 | 3.29E-01 | 1.00E+00 | 0.65  | 1.14E-01 | 6.63E-01 |
| <b>TMEM14C</b>    | 0.24  | 2.02E-01 | 1.00E+00 | -0.38 | 1.14E-01 | 6.63E-01 |
| <b>IL1R2</b>      | 0.90  | 1.10E-01 | 1.00E+00 | 0.71  | 1.15E-01 | 6.63E-01 |
| <b>AP001000.1</b> | 0.24  | 6.18E-01 | 1.00E+00 | -0.78 | 1.15E-01 | 6.63E-01 |
| <b>AL355802.1</b> | -2.06 | 3.90E-01 | 1.00E+00 | -1.35 | 1.15E-01 | 6.63E-01 |
| <b>AC144652.1</b> | -0.14 | 7.56E-01 | 1.00E+00 | -1.03 | 1.15E-01 | 6.64E-01 |
| <b>MIPOL1</b>     | 0.05  | 8.89E-01 | 1.00E+00 | -0.46 | 1.15E-01 | 6.64E-01 |
| <b>HMBOX1</b>     | 0.19  | 5.25E-01 | 1.00E+00 | -0.47 | 1.15E-01 | 6.64E-01 |
| <b>AL445253.1</b> | -0.51 | 1.71E-01 | 1.00E+00 | -1.28 | 1.15E-01 | 6.64E-01 |
| <b>CRYZL2P</b>    | 0.24  | 3.16E-01 | 1.00E+00 | -0.82 | 1.15E-01 | 6.64E-01 |
| <b>DM1-AS</b>     | -0.72 | 6.43E-01 | 1.00E+00 | 1.34  | 1.15E-01 | 6.64E-01 |
| <b>C2CD4B</b>     | -2.80 | 6.94E-04 | 1.25E-01 | -1.62 | 1.15E-01 | 6.65E-01 |
| <b>DGUOK-AS1</b>  | -0.18 | 7.21E-01 | 1.00E+00 | -0.97 | 1.15E-01 | 6.65E-01 |
| <b>RGL3</b>       | 0.37  | 5.84E-01 | 1.00E+00 | 1.26  | 1.15E-01 | 6.65E-01 |
| <b>TMEM132E</b>   | -0.59 | 2.76E-01 | 1.00E+00 | 1.98  | 1.15E-01 | 6.65E-01 |
| <b>TMEM266</b>    | -0.07 | 8.66E-01 | 1.00E+00 | 0.93  | 1.15E-01 | 6.65E-01 |
| <b>CCNK</b>       | -0.06 | 8.28E-01 | 1.00E+00 | 0.59  | 1.15E-01 | 6.65E-01 |
| <b>NSUN5</b>      | -0.12 | 5.93E-01 | 1.00E+00 | 0.32  | 1.15E-01 | 6.65E-01 |
| <b>PPM1K</b>      | 0.48  | 2.46E-01 | 1.00E+00 | 0.67  | 1.15E-01 | 6.66E-01 |
| <b>H2AFV</b>      | 0.11  | 6.17E-01 | 1.00E+00 | -0.41 | 1.15E-01 | 6.66E-01 |
| <b>AC087893.1</b> | -0.44 | 9.00E-01 | 1.00E+00 | 2.65  | 1.16E-01 | 6.66E-01 |
| <b>CAP2</b>       | 0.49  | 5.21E-01 | 1.00E+00 | -0.75 | 1.16E-01 | 6.66E-01 |
| <b>U6</b>         | 2.39  | 4.82E-01 | 1.00E+00 | -1.22 | 1.16E-01 | 6.66E-01 |
| <b>TBC1D32</b>    | 0.12  | 7.61E-01 | 1.00E+00 | -0.58 | 1.16E-01 | 6.66E-01 |
| <b>ASNSD1</b>     | 0.19  | 4.25E-01 | 1.00E+00 | -0.39 | 1.16E-01 | 6.66E-01 |
| <b>MT-ND6</b>     | 0.07  | 8.61E-01 | 1.00E+00 | -0.52 | 1.16E-01 | 6.66E-01 |
| <b>SPTY2D10S</b>  | 0.49  | 7.87E-01 | 1.00E+00 | -0.98 | 1.16E-01 | 6.66E-01 |
| <b>MEX3A</b>      | -0.88 | 8.79E-02 | 1.00E+00 | 1.21  | 1.16E-01 | 6.66E-01 |

|                    |       |          |          |       |          |          |
|--------------------|-------|----------|----------|-------|----------|----------|
| <b>RYR1</b>        | 0.34  | 3.17E-01 | 1.00E+00 | -0.86 | 1.16E-01 | 6.66E-01 |
| <b>TMEM240</b>     | 0.07  | 9.06E-01 | 1.00E+00 | 1.88  | 1.16E-01 | 6.66E-01 |
| <b>PABPC4L</b>     | -0.61 | 1.61E-01 | 1.00E+00 | 0.97  | 1.16E-01 | 6.66E-01 |
| <b>NDUFA1</b>      | 0.07  | 7.70E-01 | 1.00E+00 | -0.59 | 1.16E-01 | 6.66E-01 |
| <b>XLOC_009680</b> | 0.44  | 8.99E-01 | 1.00E+00 | -3.03 | 1.16E-01 | 6.66E-01 |
| <b>C12orf54</b>    | -3.00 | 3.20E-02 | 1.00E+00 | 1.02  | 1.16E-01 | 6.66E-01 |
| <b>PRDX3</b>       | 0.37  | 3.77E-01 | 1.00E+00 | -0.64 | 1.16E-01 | 6.66E-01 |
| <b>G33806</b>      | 0.21  | 8.68E-01 | 1.00E+00 | 2.02  | 1.16E-01 | 6.66E-01 |
| <b>CLSPN</b>       | -0.40 | 3.26E-01 | 1.00E+00 | 0.78  | 1.16E-01 | 6.66E-01 |
| <b>UPF3AP3</b>     | 0.58  | 3.93E-01 | 1.00E+00 | 1.71  | 1.16E-01 | 6.66E-01 |
| <b>AP000344.1</b>  | 1.19  | 1.63E-01 | 1.00E+00 | 1.41  | 1.16E-01 | 6.66E-01 |
| <b>TNFSF8</b>      | -0.04 | 9.46E-01 | 1.00E+00 | 1.20  | 1.16E-01 | 6.66E-01 |
| <b>LINC01091</b>   | 0.46  | 2.83E-01 | 1.00E+00 | -0.66 | 1.16E-01 | 6.66E-01 |
| <b>TMIGD2</b>      | -0.04 | 9.73E-01 | 1.00E+00 | 2.01  | 1.16E-01 | 6.66E-01 |
| <b>SMOC2</b>       | 0.52  | 2.22E-01 | 1.00E+00 | 0.61  | 1.16E-01 | 6.66E-01 |
| <b>AC079140.3</b>  | 0.24  | 8.92E-01 | 1.00E+00 | -1.67 | 1.16E-01 | 6.66E-01 |
| <b>RPL10P12</b>    | 0.58  | 8.66E-01 | 1.00E+00 | 1.44  | 1.16E-01 | 6.66E-01 |
| <b>BCAT2</b>       | -0.11 | 6.90E-01 | 1.00E+00 | -0.35 | 1.16E-01 | 6.66E-01 |
| <b>SLC39A14</b>    | 0.17  | 4.50E-01 | 1.00E+00 | 0.61  | 1.16E-01 | 6.66E-01 |
| <b>CEP63</b>       | -0.04 | 8.20E-01 | 1.00E+00 | -0.32 | 1.16E-01 | 6.66E-01 |
| <b>AC004980.1</b>  | -0.24 | 5.46E-01 | 1.00E+00 | -0.79 | 1.16E-01 | 6.67E-01 |
| <b>XLOC_002619</b> | -1.00 | 5.65E-01 | 1.00E+00 | -1.81 | 1.16E-01 | 6.67E-01 |
| <b>CD69</b>        | -0.16 | 8.52E-01 | 1.00E+00 | 0.93  | 1.16E-01 | 6.67E-01 |
| <b>GLA</b>         | 0.05  | 7.41E-01 | 1.00E+00 | 0.41  | 1.17E-01 | 6.67E-01 |
| <b>QSOX2</b>       | 0.12  | 5.35E-01 | 1.00E+00 | 0.95  | 1.17E-01 | 6.67E-01 |
| <b>TLR6</b>        | -0.67 | 1.38E-01 | 1.00E+00 | 1.11  | 1.17E-01 | 6.67E-01 |
| <b>AL022328.3</b>  | 0.30  | 7.80E-01 | 1.00E+00 | 2.41  | 1.17E-01 | 6.67E-01 |
| <b>VIPR1-AS1</b>   | 1.28  | 1.06E-01 | 1.00E+00 | -1.41 | 1.17E-01 | 6.68E-01 |
| <b>ZUP1</b>        | -0.02 | 9.57E-01 | 1.00E+00 | 0.41  | 1.17E-01 | 6.68E-01 |
| <b>F10</b>         | 0.50  | 1.26E-01 | 1.00E+00 | 0.84  | 1.17E-01 | 6.68E-01 |
| <b>PIP4K2A</b>     | -0.03 | 9.02E-01 | 1.00E+00 | 0.40  | 1.17E-01 | 6.68E-01 |
| <b>AC105235.1</b>  | -0.06 | 9.86E-01 | 1.00E+00 | -3.54 | 1.17E-01 | 6.68E-01 |

|                   |       |          |          |       |          |          |
|-------------------|-------|----------|----------|-------|----------|----------|
| <b>TAP2</b>       | 0.27  | 5.30E-01 | 1.00E+00 | 0.81  | 1.17E-01 | 6.68E-01 |
| <b>CNNM3-DT</b>   | -0.35 | 5.99E-01 | 1.00E+00 | 1.30  | 1.17E-01 | 6.68E-01 |
| <b>EPB42</b>      | 6.56  | 4.90E-02 | 1.00E+00 | -1.91 | 1.17E-01 | 6.68E-01 |
| <b>ZBTB47</b>     | -0.04 | 9.35E-01 | 1.00E+00 | 1.20  | 1.17E-01 | 6.68E-01 |
| <b>DNAJC7</b>     | -0.16 | 4.29E-01 | 1.00E+00 | 0.30  | 1.17E-01 | 6.68E-01 |
| <b>CAMK2A</b>     | -4.79 | 1.22E-02 | 6.87E-01 | 1.58  | 1.17E-01 | 6.68E-01 |
| <b>ACVR1</b>      | -0.14 | 5.76E-01 | 1.00E+00 | 0.60  | 1.17E-01 | 6.68E-01 |
| <b>AC023024.1</b> | -0.30 | 7.07E-01 | 1.00E+00 | 1.38  | 1.17E-01 | 6.68E-01 |
| <b>THRSP</b>      | 4.79  | 2.88E-03 | 2.79E-01 | -1.38 | 1.17E-01 | 6.68E-01 |
| <b>C8orf74</b>    | -0.60 | 4.91E-01 | 1.00E+00 | 1.92  | 1.17E-01 | 6.68E-01 |
| <b>PLIN2</b>      | 0.21  | 4.49E-01 | 1.00E+00 | -0.65 | 1.17E-01 | 6.69E-01 |
| <b>ANXA3</b>      | 0.17  | 7.47E-01 | 1.00E+00 | -0.49 | 1.17E-01 | 6.69E-01 |
| <b>AC090602.1</b> | -0.01 | 9.97E-01 | 1.00E+00 | -1.07 | 1.17E-01 | 6.69E-01 |
| <b>MRPS10</b>     | 0.08  | 5.96E-01 | 1.00E+00 | -0.32 | 1.17E-01 | 6.69E-01 |
| <b>FABP4</b>      | 3.51  | 1.90E-02 | 8.66E-01 | -1.34 | 1.18E-01 | 6.70E-01 |
| <b>NEK9</b>       | 0.23  | 2.88E-01 | 1.00E+00 | 0.52  | 1.18E-01 | 6.70E-01 |
| <b>PCBD2</b>      | 0.17  | 4.93E-01 | 1.00E+00 | -0.45 | 1.18E-01 | 6.70E-01 |
| <b>SLPI</b>       | 0.23  | 5.05E-01 | 1.00E+00 | 0.73  | 1.18E-01 | 6.70E-01 |
| <b>CEP170B</b>    | -0.35 | 3.74E-01 | 1.00E+00 | 1.09  | 1.18E-01 | 6.70E-01 |
| <b>APOOL</b>      | -0.29 | 1.38E-01 | 1.00E+00 | -0.38 | 1.18E-01 | 6.70E-01 |
| <b>CRTC1</b>      | -0.60 | 1.02E-01 | 1.00E+00 | 1.12  | 1.18E-01 | 6.70E-01 |
| <b>TSSK3</b>      | -0.63 | 8.00E-01 | 1.00E+00 | -1.36 | 1.18E-01 | 6.70E-01 |
| <b>NHP2P1</b>     | -0.34 | 9.19E-01 | 1.00E+00 | -0.86 | 1.18E-01 | 6.70E-01 |
| <b>FAM156A</b>    | -0.93 | 7.45E-02 | 1.00E+00 | -0.55 | 1.18E-01 | 6.70E-01 |
| <b>AP002761.4</b> | 0.41  | 2.09E-01 | 1.00E+00 | 1.10  | 1.18E-01 | 6.70E-01 |
| <b>PHYHIP</b>     | 0.77  | 1.24E-02 | 6.93E-01 | -0.60 | 1.18E-01 | 6.70E-01 |
| <b>COX11</b>      | -0.19 | 4.26E-01 | 1.00E+00 | -0.39 | 1.18E-01 | 6.70E-01 |
| <b>AL139398.1</b> | -0.89 | 4.07E-01 | 1.00E+00 | 1.45  | 1.18E-01 | 6.70E-01 |
| <b>TRIM24</b>     | -0.12 | 4.91E-01 | 1.00E+00 | -0.60 | 1.18E-01 | 6.70E-01 |
| <b>EXOC5</b>      | 0.20  | 4.63E-01 | 1.00E+00 | -0.28 | 1.18E-01 | 6.71E-01 |
| <b>SPECC1</b>     | -0.15 | 6.49E-01 | 1.00E+00 | 0.50  | 1.18E-01 | 6.71E-01 |
| <b>CUZD1</b>      | 1.39  | 1.41E-01 | 1.00E+00 | 1.81  | 1.18E-01 | 6.71E-01 |

|                    |       |          |          |       |          |          |
|--------------------|-------|----------|----------|-------|----------|----------|
| <b>DDX50P1</b>     | 2.41  | 3.27E-01 | 1.00E+00 | 1.79  | 1.18E-01 | 6.71E-01 |
| <b>SIGMAR1</b>     | -0.28 | 3.10E-01 | 1.00E+00 | -0.31 | 1.18E-01 | 6.71E-01 |
| <b>SNORA53</b>     | 0.56  | 8.71E-01 | 1.00E+00 | -3.25 | 1.18E-01 | 6.71E-01 |
| <b>MAPK4</b>       | 0.05  | 9.47E-01 | 1.00E+00 | -1.33 | 1.18E-01 | 6.71E-01 |
| <b>PKD2L1</b>      | 0.50  | 8.84E-01 | 1.00E+00 | 2.32  | 1.18E-01 | 6.71E-01 |
| <b>MEI4</b>        | -0.23 | 8.82E-01 | 1.00E+00 | 2.55  | 1.18E-01 | 6.71E-01 |
| <b>AC010280.2</b>  | 0.96  | 4.77E-01 | 1.00E+00 | -1.44 | 1.18E-01 | 6.71E-01 |
| <b>ACYP1</b>       | 0.32  | 3.05E-01 | 1.00E+00 | -0.62 | 1.19E-01 | 6.71E-01 |
| <b>DACT1</b>       | -0.16 | 7.41E-01 | 1.00E+00 | 1.23  | 1.19E-01 | 6.71E-01 |
| <b>UBE2V2</b>      | 0.14  | 5.10E-01 | 1.00E+00 | -0.62 | 1.19E-01 | 6.71E-01 |
| <b>PHF21A</b>      | -0.08 | 7.59E-01 | 1.00E+00 | 0.51  | 1.19E-01 | 6.71E-01 |
| <b>ARHGEF10</b>    | -0.25 | 3.93E-01 | 1.00E+00 | 0.69  | 1.19E-01 | 6.71E-01 |
| <b>C3AR1</b>       | 0.43  | 2.56E-01 | 1.00E+00 | 1.10  | 1.19E-01 | 6.71E-01 |
| <b>PADI1</b>       | -0.75 | 2.20E-01 | 1.00E+00 | 1.36  | 1.19E-01 | 6.71E-01 |
| <b>ADAP1</b>       | -0.53 | 2.33E-01 | 1.00E+00 | 0.86  | 1.19E-01 | 6.71E-01 |
| <b>SERPINF1</b>    | 0.68  | 1.39E-01 | 1.00E+00 | 0.79  | 1.19E-01 | 6.71E-01 |
| <b>AC006504.3</b>  | -0.16 | 9.62E-01 | 1.00E+00 | -2.81 | 1.19E-01 | 6.71E-01 |
| <b>AC124319.1</b>  | 2.57  | 3.89E-01 | 1.00E+00 | 2.75  | 1.19E-01 | 6.71E-01 |
| <b>AC004656.1</b>  | 0.32  | 6.51E-01 | 1.00E+00 | -0.70 | 1.19E-01 | 6.71E-01 |
| <b>CC2D1B</b>      | -0.04 | 8.25E-01 | 1.00E+00 | 0.69  | 1.19E-01 | 6.72E-01 |
| <b>PRCP</b>        | 0.10  | 6.88E-01 | 1.00E+00 | 0.37  | 1.19E-01 | 6.72E-01 |
| <b>SLC19A3</b>     | 2.47  | 3.05E-03 | 2.89E-01 | -1.14 | 1.19E-01 | 6.72E-01 |
| <b>RHOXF1-AS1</b>  | 1.40  | 2.88E-01 | 1.00E+00 | -1.58 | 1.19E-01 | 6.72E-01 |
| <b>FOLR2</b>       | 0.27  | 6.09E-01 | 1.00E+00 | 0.76  | 1.19E-01 | 6.72E-01 |
| <b>CS</b>          | 0.03  | 8.68E-01 | 1.00E+00 | -0.34 | 1.19E-01 | 6.72E-01 |
| <b>XLOC_005629</b> | -1.85 | 4.39E-01 | 1.00E+00 | -2.51 | 1.19E-01 | 6.72E-01 |
| <b>KMT2D</b>       | -0.31 | 2.84E-01 | 1.00E+00 | 1.21  | 1.19E-01 | 6.72E-01 |
| <b>AC068580.3</b>  | 0.33  | 8.43E-01 | 1.00E+00 | 2.28  | 1.19E-01 | 6.72E-01 |
| <b>HIST1H3H</b>    | -1.68 | 5.89E-02 | 1.00E+00 | -0.74 | 1.19E-01 | 6.72E-01 |
| <b>GCAT</b>        | -0.22 | 5.18E-01 | 1.00E+00 | -0.38 | 1.19E-01 | 6.72E-01 |
| <b>CCL2</b>        | -1.02 | 1.05E-01 | 1.00E+00 | 0.78  | 1.19E-01 | 6.72E-01 |
| <b>XLOC_002390</b> | 1.26  | 6.46E-01 | 1.00E+00 | 2.57  | 1.19E-01 | 6.72E-01 |

|             |       |          |          |       |          |          |
|-------------|-------|----------|----------|-------|----------|----------|
| CCR2        | -0.40 | 4.44E-01 | 1.00E+00 | 1.44  | 1.19E-01 | 6.72E-01 |
| ANKRD44     | 0.08  | 8.06E-01 | 1.00E+00 | 0.60  | 1.19E-01 | 6.72E-01 |
| C19orf38    | -0.56 | 4.18E-01 | 1.00E+00 | 1.75  | 1.19E-01 | 6.72E-01 |
| SENP8       | 0.01  | 9.82E-01 | 1.00E+00 | -0.66 | 1.19E-01 | 6.72E-01 |
| WASH4P      | -0.45 | 1.96E-01 | 1.00E+00 | 0.94  | 1.19E-01 | 6.72E-01 |
| CRAT        | 0.50  | 3.73E-01 | 1.00E+00 | -0.93 | 1.19E-01 | 6.72E-01 |
| SCOC        | 0.16  | 5.92E-01 | 1.00E+00 | -0.63 | 1.19E-01 | 6.72E-01 |
| RNF167      | -0.07 | 7.72E-01 | 1.00E+00 | 0.47  | 1.19E-01 | 6.72E-01 |
| CCL21       | 0.10  | 7.80E-01 | 1.00E+00 | 0.84  | 1.20E-01 | 6.72E-01 |
| BAK1P1      | -0.83 | 3.88E-01 | 1.00E+00 | -1.33 | 1.20E-01 | 6.72E-01 |
| NBR2        | -0.02 | 9.61E-01 | 1.00E+00 | -0.54 | 1.20E-01 | 6.72E-01 |
| INAFM1      | -0.33 | 3.19E-01 | 1.00E+00 | 0.70  | 1.20E-01 | 6.72E-01 |
| SERPING1    | 0.27  | 4.76E-01 | 1.00E+00 | 0.73  | 1.20E-01 | 6.72E-01 |
| DACH2       | -2.03 | 5.87E-02 | 1.00E+00 | -1.83 | 1.20E-01 | 6.72E-01 |
| AC007182.1  | -0.36 | 7.47E-01 | 1.00E+00 | 1.10  | 1.20E-01 | 6.72E-01 |
| GMPPA       | -0.09 | 6.89E-01 | 1.00E+00 | 0.36  | 1.20E-01 | 6.72E-01 |
| USP37       | -0.29 | 4.36E-01 | 1.00E+00 | -0.43 | 1.20E-01 | 6.72E-01 |
| ELP5        | 0.05  | 7.94E-01 | 1.00E+00 | -0.32 | 1.20E-01 | 6.72E-01 |
| AC093423.2  | 0.92  | 4.53E-01 | 1.00E+00 | -1.65 | 1.20E-01 | 6.72E-01 |
| AKAP11      | 0.02  | 9.29E-01 | 1.00E+00 | 0.43  | 1.20E-01 | 6.73E-01 |
| SAMD4A      | 0.34  | 4.15E-01 | 1.00E+00 | 0.76  | 1.20E-01 | 6.73E-01 |
| AC022149.1  | 0.04  | 9.39E-01 | 1.00E+00 | -0.56 | 1.20E-01 | 6.73E-01 |
| AC107021.2  | 0.99  | 6.51E-01 | 1.00E+00 | 2.09  | 1.20E-01 | 6.73E-01 |
| AGPAT4-IT1  | 1.77  | 1.80E-01 | 1.00E+00 | 1.55  | 1.20E-01 | 6.73E-01 |
| ELF3-AS1    | -2.55 | 8.32E-02 | 1.00E+00 | 1.06  | 1.20E-01 | 6.73E-01 |
| RNASEH2C    | -0.12 | 6.64E-01 | 1.00E+00 | 0.28  | 1.20E-01 | 6.73E-01 |
| TATDN1      | 0.07  | 7.20E-01 | 1.00E+00 | -0.42 | 1.20E-01 | 6.73E-01 |
| AC092535.4  | -0.55 | 6.36E-01 | 1.00E+00 | 1.67  | 1.20E-01 | 6.73E-01 |
| AC009271.1  | 0.26  | 8.42E-01 | 1.00E+00 | 1.43  | 1.20E-01 | 6.73E-01 |
| ANKRD20A14P | -0.95 | 1.35E-01 | 1.00E+00 | -1.10 | 1.20E-01 | 6.74E-01 |
| AL357033.3  | -0.33 | 6.64E-01 | 1.00E+00 | 1.54  | 1.20E-01 | 6.74E-01 |
| NALT1       | 0.48  | 6.80E-01 | 1.00E+00 | -1.40 | 1.21E-01 | 6.74E-01 |

|                   |       |          |          |       |          |          |
|-------------------|-------|----------|----------|-------|----------|----------|
| <b>PHF5A</b>      | 0.10  | 6.22E-01 | 1.00E+00 | 0.54  | 1.21E-01 | 6.74E-01 |
| <b>EIF2B5</b>     | 0.16  | 3.42E-01 | 1.00E+00 | -0.69 | 1.21E-01 | 6.74E-01 |
| <b>LINC01564</b>  | 0.71  | 7.07E-01 | 1.00E+00 | -2.39 | 1.21E-01 | 6.74E-01 |
| <b>DICER1-AS1</b> | -0.51 | 2.20E-01 | 1.00E+00 | -0.62 | 1.21E-01 | 6.74E-01 |
| <b>VIL1</b>       | -1.60 | 4.02E-01 | 1.00E+00 | 3.58  | 1.21E-01 | 6.74E-01 |
| <b>KDELC1P1</b>   | 1.76  | 6.05E-01 | 1.00E+00 | -3.70 | 1.21E-01 | 6.74E-01 |
| <b>EHBP1L1</b>    | -0.42 | 1.16E-01 | 1.00E+00 | 1.70  | 1.21E-01 | 6.74E-01 |
| <b>SORCS3</b>     | -0.69 | 4.65E-01 | 1.00E+00 | 1.86  | 1.21E-01 | 6.74E-01 |
| <b>AL365203.2</b> | -0.22 | 7.22E-01 | 1.00E+00 | 1.11  | 1.21E-01 | 6.74E-01 |
| <b>AC009041.2</b> | 0.21  | 8.09E-01 | 1.00E+00 | -0.95 | 1.21E-01 | 6.74E-01 |
| <b>SUCO</b>       | 0.15  | 5.89E-01 | 1.00E+00 | 0.33  | 1.21E-01 | 6.74E-01 |
| <b>AC092849.1</b> | -2.31 | 3.09E-01 | 1.00E+00 | -1.39 | 1.21E-01 | 6.74E-01 |
| <b>KLHDC2</b>     | 0.12  | 6.13E-01 | 1.00E+00 | -0.65 | 1.21E-01 | 6.74E-01 |
| <b>TAPT1</b>      | 0.35  | 1.64E-01 | 1.00E+00 | -0.68 | 1.21E-01 | 6.74E-01 |
| <b>CBWD6</b>      | 0.17  | 7.08E-01 | 1.00E+00 | -0.53 | 1.21E-01 | 6.74E-01 |
| <b>SCYL1</b>      | -0.08 | 6.94E-01 | 1.00E+00 | 0.52  | 1.21E-01 | 6.74E-01 |
| <b>ZBED8</b>      | 0.37  | 5.95E-01 | 1.00E+00 | -0.93 | 1.21E-01 | 6.74E-01 |
| <b>AC022413.1</b> | -0.44 | 6.67E-01 | 1.00E+00 | -1.18 | 1.21E-01 | 6.74E-01 |
| <b>NDUFA3</b>     | 0.08  | 7.37E-01 | 1.00E+00 | -0.54 | 1.21E-01 | 6.74E-01 |
| <b>AC099506.1</b> | NA    | NA       | NA       | 2.07  | 1.21E-01 | 6.74E-01 |
| <b>TTC12</b>      | 0.29  | 4.89E-01 | 1.00E+00 | 0.56  | 1.21E-01 | 6.74E-01 |
| <b>VDAC2</b>      | -0.13 | 3.90E-01 | 1.00E+00 | -0.32 | 1.21E-01 | 6.74E-01 |
| <b>HIST2H2BA</b>  | 0.40  | 5.84E-01 | 1.00E+00 | 1.47  | 1.21E-01 | 6.74E-01 |
| <b>TRAPPC11</b>   | 0.03  | 8.69E-01 | 1.00E+00 | -0.34 | 1.21E-01 | 6.74E-01 |
| <b>ANKRD13D</b>   | -0.05 | 8.29E-01 | 1.00E+00 | 0.72  | 1.21E-01 | 6.74E-01 |
| <b>ZNF826P</b>    | 0.31  | 6.22E-01 | 1.00E+00 | -0.79 | 1.21E-01 | 6.74E-01 |
| <b>AL451165.2</b> | 0.17  | 7.13E-01 | 1.00E+00 | -0.69 | 1.21E-01 | 6.74E-01 |
| <b>AL137003.1</b> | 0.26  | 6.30E-01 | 1.00E+00 | 0.57  | 1.21E-01 | 6.74E-01 |
| <b>AC002524.1</b> | -1.18 | 4.82E-01 | 1.00E+00 | -0.97 | 1.21E-01 | 6.74E-01 |
| <b>GPR141</b>     | 0.67  | 5.94E-01 | 1.00E+00 | 1.31  | 1.21E-01 | 6.74E-01 |
| <b>ELOVL6</b>     | 0.25  | 4.74E-01 | 1.00E+00 | -0.46 | 1.21E-01 | 6.74E-01 |
| <b>RNA5-8SP3</b>  | 0.66  | 8.49E-01 | 1.00E+00 | -2.16 | 1.21E-01 | 6.74E-01 |

|            |       |          |          |       |          |          |
|------------|-------|----------|----------|-------|----------|----------|
| ZNF655     | 0.13  | 5.88E-01 | 1.00E+00 | -0.25 | 1.21E-01 | 6.74E-01 |
| LINC01181  | -2.86 | 6.35E-02 | 1.00E+00 | 2.14  | 1.21E-01 | 6.74E-01 |
| KARS       | -0.25 | 1.09E-01 | 1.00E+00 | -0.24 | 1.21E-01 | 6.74E-01 |
| CASP6      | 0.06  | 7.74E-01 | 1.00E+00 | -0.60 | 1.22E-01 | 6.74E-01 |
| GUCY2D     | -3.37 | 2.22E-03 | 2.39E-01 | 1.02  | 1.22E-01 | 6.74E-01 |
| AC215522.2 | -2.94 | 3.86E-01 | 1.00E+00 | 1.80  | 1.22E-01 | 6.74E-01 |
| AC092384.2 | 0.29  | 5.13E-01 | 1.00E+00 | -1.09 | 1.22E-01 | 6.75E-01 |
| PLXNA1     | -0.07 | 8.21E-01 | 1.00E+00 | 0.95  | 1.22E-01 | 6.75E-01 |
| CASP7      | 0.23  | 4.68E-01 | 1.00E+00 | 0.43  | 1.22E-01 | 6.76E-01 |
| AL354714.2 | -0.17 | 9.61E-01 | 1.00E+00 | -0.78 | 1.22E-01 | 6.76E-01 |
| MICAL1     | -0.34 | 2.78E-01 | 1.00E+00 | 0.93  | 1.22E-01 | 6.76E-01 |
| SIPA1L2    | -0.31 | 3.54E-01 | 1.00E+00 | 0.80  | 1.22E-01 | 6.76E-01 |
| DEFB1      | 0.26  | 5.07E-01 | 1.00E+00 | -0.85 | 1.22E-01 | 6.76E-01 |
| FAM214B    | -0.24 | 3.22E-01 | 1.00E+00 | 0.72  | 1.22E-01 | 6.76E-01 |
| AL357054.4 | -0.02 | 9.68E-01 | 1.00E+00 | 1.13  | 1.22E-01 | 6.76E-01 |
| LBH        | 0.18  | 6.42E-01 | 1.00E+00 | 0.72  | 1.22E-01 | 6.76E-01 |
| ITPR1-DT   | 0.03  | 9.87E-01 | 1.00E+00 | -2.09 | 1.22E-01 | 6.76E-01 |
| TBX22      | 1.71  | 4.45E-01 | 1.00E+00 | -2.65 | 1.22E-01 | 6.76E-01 |
| MICU2      | 0.03  | 9.22E-01 | 1.00E+00 | -0.38 | 1.22E-01 | 6.76E-01 |
| BASP1      | -0.46 | 2.03E-01 | 1.00E+00 | 0.99  | 1.22E-01 | 6.76E-01 |
| RRM1       | -0.09 | 7.14E-01 | 1.00E+00 | -0.35 | 1.22E-01 | 6.76E-01 |
| HAT1       | -0.05 | 7.99E-01 | 1.00E+00 | -0.44 | 1.22E-01 | 6.76E-01 |
| GRID2      | -2.18 | 1.94E-01 | 1.00E+00 | -3.50 | 1.23E-01 | 6.76E-01 |
| AC007663.1 | 0.41  | 4.91E-01 | 1.00E+00 | -0.87 | 1.23E-01 | 6.76E-01 |
| G6692      | NA    | NA       | NA       | 3.94  | 1.23E-01 | 6.76E-01 |
| FAM81B     | -0.74 | 6.61E-01 | 1.00E+00 | 1.67  | 1.23E-01 | 6.76E-01 |
| VAMP4      | 0.40  | 1.87E-01 | 1.00E+00 | -0.49 | 1.23E-01 | 6.76E-01 |
| TMEM200C   | -0.12 | 7.84E-01 | 1.00E+00 | 1.21  | 1.23E-01 | 6.76E-01 |
| KRAS       | -0.10 | 7.30E-01 | 1.00E+00 | -0.31 | 1.23E-01 | 6.77E-01 |
| UBXN1      | 0.01  | 9.76E-01 | 1.00E+00 | 0.32  | 1.23E-01 | 6.77E-01 |
| EIF5A2     | -0.11 | 7.05E-01 | 1.00E+00 | -0.41 | 1.23E-01 | 6.77E-01 |
| C2orf72    | 0.84  | 5.03E-01 | 1.00E+00 | -1.24 | 1.23E-01 | 6.77E-01 |



|                   |       |          |          |       |          |          |
|-------------------|-------|----------|----------|-------|----------|----------|
| <b>G39807</b>     | -1.12 | 3.85E-01 | 1.00E+00 | 1.77  | 1.23E-01 | 6.78E-01 |
| <b>DCAF13P3</b>   | -0.22 | 9.17E-01 | 1.00E+00 | 2.17  | 1.23E-01 | 6.78E-01 |
| <b>AC002091.1</b> | -1.78 | 1.96E-01 | 1.00E+00 | 2.02  | 1.23E-01 | 6.78E-01 |
| <b>TSPAN32</b>    | -0.48 | 5.76E-01 | 1.00E+00 | 1.22  | 1.23E-01 | 6.78E-01 |
| <b>DRAM1</b>      | 0.15  | 6.58E-01 | 1.00E+00 | 0.84  | 1.23E-01 | 6.78E-01 |
| <b>ELOF1</b>      | 0.09  | 5.94E-01 | 1.00E+00 | 0.41  | 1.23E-01 | 6.78E-01 |
| <b>KAT7</b>       | -0.19 | 3.82E-01 | 1.00E+00 | -0.28 | 1.23E-01 | 6.78E-01 |
| <b>AC016708.1</b> | 0.17  | 6.66E-01 | 1.00E+00 | -1.17 | 1.23E-01 | 6.78E-01 |
| <b>AF064860.2</b> | -0.52 | 6.72E-01 | 1.00E+00 | -2.26 | 1.23E-01 | 6.78E-01 |
| <b>PIP4K2B</b>    | 0.26  | 3.25E-01 | 1.00E+00 | 0.67  | 1.23E-01 | 6.78E-01 |
| <b>PDS5B</b>      | 0.09  | 6.40E-01 | 1.00E+00 | -0.35 | 1.24E-01 | 6.78E-01 |
| <b>PPP1R2P1</b>   | -2.02 | 5.55E-01 | 1.00E+00 | -1.79 | 1.24E-01 | 6.78E-01 |
| <b>AC011481.3</b> | -1.27 | 1.51E-01 | 1.00E+00 | -1.47 | 1.24E-01 | 6.78E-01 |
| <b>DENND2D</b>    | 0.48  | 2.16E-01 | 1.00E+00 | 0.50  | 1.24E-01 | 6.78E-01 |
| <b>HS6ST3</b>     | 0.52  | 4.80E-01 | 1.00E+00 | -1.61 | 1.24E-01 | 6.78E-01 |
| <b>SOX21</b>      | -0.18 | 6.64E-01 | 1.00E+00 | -1.08 | 1.24E-01 | 6.78E-01 |
| <b>LINC00449</b>  | -2.52 | 4.51E-01 | 1.00E+00 | -1.43 | 1.24E-01 | 6.78E-01 |
| <b>NUDT11</b>     | -0.13 | 7.12E-01 | 1.00E+00 | -0.57 | 1.24E-01 | 6.78E-01 |
| <b>FAM69C</b>     | -0.67 | 8.28E-02 | 1.00E+00 | -1.10 | 1.24E-01 | 6.78E-01 |
| <b>AC027237.3</b> | 0.01  | 9.93E-01 | 1.00E+00 | 1.53  | 1.24E-01 | 6.78E-01 |
| <b>ADA</b>        | -0.03 | 9.61E-01 | 1.00E+00 | 0.58  | 1.24E-01 | 6.78E-01 |
| <b>G12891</b>     | 1.70  | 1.05E-01 | 1.00E+00 | -1.74 | 1.24E-01 | 6.78E-01 |
| <b>MELK</b>       | -0.08 | 8.60E-01 | 1.00E+00 | 0.73  | 1.24E-01 | 6.78E-01 |
| <b>ATXN7L1</b>    | -0.22 | 4.29E-01 | 1.00E+00 | 0.35  | 1.24E-01 | 6.78E-01 |
| <b>G13124</b>     | 0.00  | 9.98E-01 | 1.00E+00 | -1.25 | 1.24E-01 | 6.78E-01 |
| <b>C3orf70</b>    | 0.15  | 7.55E-01 | 1.00E+00 | -0.53 | 1.24E-01 | 6.78E-01 |
| <b>SERPINB13</b>  | -0.03 | 9.64E-01 | 1.00E+00 | 1.10  | 1.24E-01 | 6.78E-01 |
| <b>AC138392.1</b> | 0.83  | 3.66E-01 | 1.00E+00 | 0.88  | 1.24E-01 | 6.78E-01 |
| <b>UFM1</b>       | 0.19  | 4.13E-01 | 1.00E+00 | -0.48 | 1.24E-01 | 6.78E-01 |
| <b>VPS29</b>      | 0.12  | 5.78E-01 | 1.00E+00 | -0.67 | 1.24E-01 | 6.78E-01 |
| <b>AL133410.1</b> | 3.48  | 3.03E-01 | 1.00E+00 | -2.40 | 1.24E-01 | 6.78E-01 |
| <b>IL1B</b>       | -0.85 | 3.90E-01 | 1.00E+00 | 1.43  | 1.24E-01 | 6.78E-01 |

|                    |       |          |          |       |          |          |
|--------------------|-------|----------|----------|-------|----------|----------|
| <b>RP11-14N7.2</b> | 3.76  | 5.16E-02 | 1.00E+00 | 1.34  | 1.24E-01 | 6.78E-01 |
| <b>ZNF577</b>      | 0.05  | 8.72E-01 | 1.00E+00 | -0.57 | 1.24E-01 | 6.78E-01 |
| <b>STARD7</b>      | 0.39  | 5.36E-02 | 1.00E+00 | -0.41 | 1.24E-01 | 6.78E-01 |
| <b>TM2D1</b>       | 0.41  | 1.27E-01 | 1.00E+00 | -0.66 | 1.24E-01 | 6.78E-01 |
| <b>ADGRL3</b>      | -0.79 | 1.22E-01 | 1.00E+00 | -0.85 | 1.24E-01 | 6.78E-01 |
| <b>MYH14</b>       | -0.10 | 8.06E-01 | 1.00E+00 | -1.09 | 1.24E-01 | 6.78E-01 |
| <b>CHST3</b>       | 0.08  | 7.36E-01 | 1.00E+00 | 0.86  | 1.24E-01 | 6.78E-01 |
| <b>XLOC_013424</b> | 1.01  | 1.37E-01 | 1.00E+00 | -0.83 | 1.24E-01 | 6.78E-01 |
| <b>GPRASP2</b>     | 0.11  | 6.34E-01 | 1.00E+00 | -0.48 | 1.24E-01 | 6.78E-01 |
| <b>CASP10</b>      | 0.18  | 6.40E-01 | 1.00E+00 | 0.66  | 1.24E-01 | 6.78E-01 |
| <b>SLC43A2</b>     | -0.20 | 6.81E-01 | 1.00E+00 | 1.20  | 1.24E-01 | 6.78E-01 |
| <b>USP36</b>       | -0.04 | 8.54E-01 | 1.00E+00 | 0.52  | 1.24E-01 | 6.78E-01 |
| <b>DMAC2</b>       | -0.03 | 8.75E-01 | 1.00E+00 | 0.17  | 1.24E-01 | 6.78E-01 |
| <b>PRICKLE3</b>    | -0.33 | 2.84E-01 | 1.00E+00 | 0.43  | 1.25E-01 | 6.78E-01 |
| <b>AC108047.1</b>  | -0.14 | 7.84E-01 | 1.00E+00 | -0.68 | 1.25E-01 | 6.78E-01 |
| <b>AC017100.1</b>  | 0.44  | 5.98E-01 | 1.00E+00 | -1.45 | 1.25E-01 | 6.78E-01 |
| <b>KIAA1211</b>    | -0.45 | 2.66E-01 | 1.00E+00 | 1.64  | 1.25E-01 | 6.78E-01 |
| <b>AC019181.1</b>  | -0.18 | 9.58E-01 | 1.00E+00 | 1.72  | 1.25E-01 | 6.78E-01 |
| <b>DPY19L4</b>     | 0.14  | 6.99E-01 | 1.00E+00 | -0.41 | 1.25E-01 | 6.78E-01 |
| <b>SCN8A</b>       | -2.41 | 1.32E-02 | 7.22E-01 | 1.15  | 1.25E-01 | 6.78E-01 |
| <b>CCDC71</b>      | -0.18 | 4.11E-01 | 1.00E+00 | 0.99  | 1.25E-01 | 6.78E-01 |
| <b>CERS6</b>       | 0.12  | 7.13E-01 | 1.00E+00 | -0.76 | 1.25E-01 | 6.78E-01 |
| <b>TIMM10B</b>     | 0.09  | 6.66E-01 | 1.00E+00 | -0.43 | 1.25E-01 | 6.78E-01 |
| <b>CD52</b>        | -0.95 | 1.93E-01 | 1.00E+00 | 0.78  | 1.25E-01 | 6.78E-01 |
| <b>NFKBID</b>      | -0.53 | 3.45E-01 | 1.00E+00 | 0.94  | 1.25E-01 | 6.78E-01 |
| <b>ACSL1</b>       | 0.47  | 3.18E-01 | 1.00E+00 | -0.69 | 1.25E-01 | 6.78E-01 |
| <b>HEG1</b>        | -0.06 | 8.90E-01 | 1.00E+00 | 0.85  | 1.25E-01 | 6.78E-01 |
| <b>PGA3</b>        | NA    | NA       | NA       | 1.62  | 1.25E-01 | 6.78E-01 |
| <b>BET1</b>        | 0.35  | 1.31E-01 | 1.00E+00 | -0.56 | 1.25E-01 | 6.78E-01 |
| <b>LINC02568</b>   | -0.20 | 8.23E-01 | 1.00E+00 | -1.21 | 1.25E-01 | 6.78E-01 |
| <b>RFC5</b>        | -0.13 | 5.95E-01 | 1.00E+00 | -0.47 | 1.25E-01 | 6.78E-01 |
| <b>HHLA3</b>       | 0.24  | 5.02E-01 | 1.00E+00 | -0.47 | 1.25E-01 | 6.78E-01 |

|                    |       |          |          |       |          |          |
|--------------------|-------|----------|----------|-------|----------|----------|
| <b>HIF1A</b>       | 0.00  | 9.91E-01 | 1.00E+00 | 0.32  | 1.25E-01 | 6.78E-01 |
| <b>SLC25A45</b>    | -0.21 | 6.56E-01 | 1.00E+00 | 0.68  | 1.25E-01 | 6.78E-01 |
| <b>COBLL1</b>      | 0.29  | 2.29E-01 | 1.00E+00 | -0.41 | 1.25E-01 | 6.78E-01 |
| <b>AL162171.3</b>  | -0.78 | 5.59E-01 | 1.00E+00 | 1.63  | 1.25E-01 | 6.78E-01 |
| <b>ZNF507</b>      | -0.02 | 8.85E-01 | 1.00E+00 | 0.35  | 1.25E-01 | 6.78E-01 |
| <b>KCNA4</b>       | 1.31  | 1.03E-01 | 1.00E+00 | -1.90 | 1.25E-01 | 6.78E-01 |
| <b>PGS1</b>        | -0.40 | 3.34E-02 | 1.00E+00 | 0.43  | 1.25E-01 | 6.78E-01 |
| <b>SLC25A39</b>    | -0.21 | 4.33E-01 | 1.00E+00 | 0.24  | 1.25E-01 | 6.78E-01 |
| <b>XLOC_014244</b> | 0.13  | 9.71E-01 | 1.00E+00 | 2.40  | 1.25E-01 | 6.78E-01 |
| <b>AC007406.3</b>  | -1.40 | 4.44E-01 | 1.00E+00 | 1.69  | 1.25E-01 | 6.78E-01 |
| <b>SNRNP27</b>     | 0.17  | 4.09E-01 | 1.00E+00 | -0.61 | 1.25E-01 | 6.78E-01 |
| <b>GTSE1</b>       | 0.00  | 9.96E-01 | 1.00E+00 | 0.83  | 1.25E-01 | 6.78E-01 |
| <b>KLB</b>         | 2.10  | 5.15E-03 | 4.18E-01 | -0.98 | 1.25E-01 | 6.78E-01 |
| <b>CYP2R1</b>      | -0.34 | 2.25E-01 | 1.00E+00 | -0.41 | 1.25E-01 | 6.79E-01 |
| <b>URAHF</b>       | 0.59  | 7.92E-01 | 1.00E+00 | 1.17  | 1.25E-01 | 6.79E-01 |
| <b>HDAC11</b>      | 0.22  | 2.83E-01 | 1.00E+00 | -0.35 | 1.26E-01 | 6.80E-01 |
| <b>C2orf27AP1</b>  | 0.95  | 4.85E-01 | 1.00E+00 | -1.89 | 1.26E-01 | 6.80E-01 |
| <b>DHDDS</b>       | 0.20  | 4.81E-01 | 1.00E+00 | -0.48 | 1.26E-01 | 6.80E-01 |
| <b>RNH1</b>        | -0.04 | 8.65E-01 | 1.00E+00 | 0.26  | 1.26E-01 | 6.80E-01 |
| <b>CHPF2</b>       | -0.35 | 9.01E-02 | 1.00E+00 | 0.90  | 1.26E-01 | 6.80E-01 |
| <b>APOBEC3B</b>    | -1.15 | 4.09E-02 | 1.00E+00 | 0.78  | 1.26E-01 | 6.80E-01 |
| <b>PCNX3</b>       | -0.38 | 1.82E-01 | 1.00E+00 | 0.83  | 1.26E-01 | 6.80E-01 |
| <b>AL590762.3</b>  | NA    | NA       | NA       | -1.14 | 1.26E-01 | 6.80E-01 |
| <b>MIR3188</b>     | -0.06 | 9.86E-01 | 1.00E+00 | 1.67  | 1.26E-01 | 6.80E-01 |
| <b>LINC00933</b>   | -0.39 | 5.33E-01 | 1.00E+00 | -0.94 | 1.26E-01 | 6.80E-01 |
| <b>CIDEA</b>       | 0.83  | 1.58E-01 | 1.00E+00 | -0.92 | 1.26E-01 | 6.80E-01 |
| <b>MAP3K8</b>      | 0.09  | 8.33E-01 | 1.00E+00 | 0.47  | 1.26E-01 | 6.80E-01 |
| <b>CENPA</b>       | 0.48  | 2.73E-01 | 1.00E+00 | -1.17 | 1.26E-01 | 6.80E-01 |
| <b>LRFN5</b>       | 1.14  | 5.32E-02 | 1.00E+00 | 1.07  | 1.26E-01 | 6.80E-01 |
| <b>HACD4</b>       | 0.00  | 9.98E-01 | 1.00E+00 | 0.48  | 1.26E-01 | 6.80E-01 |
| <b>PIP5K1A</b>     | 0.11  | 6.86E-01 | 1.00E+00 | 0.47  | 1.26E-01 | 6.80E-01 |
| <b>TMTC4</b>       | -0.39 | 1.83E-01 | 1.00E+00 | -0.27 | 1.26E-01 | 6.80E-01 |

|             |       |          |          |       |          |          |
|-------------|-------|----------|----------|-------|----------|----------|
| TRUB2       | -0.38 | 4.78E-02 | 1.00E+00 | -0.33 | 1.26E-01 | 6.80E-01 |
| FMC1        | 1.41  | 3.27E-01 | 1.00E+00 | -1.09 | 1.26E-01 | 6.80E-01 |
| PLCZ1       | 0.20  | 8.65E-01 | 1.00E+00 | 1.13  | 1.26E-01 | 6.80E-01 |
| CLCA3P      | -0.23 | 9.47E-01 | 1.00E+00 | 2.08  | 1.26E-01 | 6.81E-01 |
| SMDT1       | -0.14 | 4.31E-01 | 1.00E+00 | -0.43 | 1.26E-01 | 6.81E-01 |
| AC091153.1  | 1.03  | 5.86E-01 | 1.00E+00 | -1.03 | 1.26E-01 | 6.81E-01 |
| DLGAP3      | -2.06 | 2.44E-02 | 9.22E-01 | 1.39  | 1.27E-01 | 6.81E-01 |
| AC021321.1  | 2.31  | 1.56E-01 | 1.00E+00 | 1.88  | 1.27E-01 | 6.81E-01 |
| MTMR7       | -0.62 | 2.46E-01 | 1.00E+00 | -0.70 | 1.27E-01 | 6.81E-01 |
| AP005329.1  | -2.12 | 5.35E-01 | 1.00E+00 | -1.24 | 1.27E-01 | 6.82E-01 |
| HNRNPA0     | -0.09 | 6.44E-01 | 1.00E+00 | 0.64  | 1.27E-01 | 6.82E-01 |
| AL928970.1  | -1.90 | 3.24E-01 | 1.00E+00 | 1.17  | 1.27E-01 | 6.82E-01 |
| SCAI        | -0.15 | 6.65E-01 | 1.00E+00 | -0.45 | 1.27E-01 | 6.82E-01 |
| FKBP1A      | -0.01 | 9.42E-01 | 1.00E+00 | 0.43  | 1.27E-01 | 6.82E-01 |
| ACTR10      | 0.11  | 5.58E-01 | 1.00E+00 | -0.45 | 1.27E-01 | 6.82E-01 |
| PMEPA1      | 0.70  | 2.37E-01 | 1.00E+00 | 0.79  | 1.27E-01 | 6.82E-01 |
| GGTA1P      | 0.27  | 4.17E-01 | 1.00E+00 | -0.54 | 1.27E-01 | 6.82E-01 |
| YWHAB       | -0.10 | 4.16E-01 | 1.00E+00 | -0.21 | 1.27E-01 | 6.83E-01 |
| XLOC_014159 | 1.21  | 3.01E-01 | 1.00E+00 | -1.42 | 1.27E-01 | 6.83E-01 |
| AC074367.1  | NA    | NA       | NA       | -2.31 | 1.27E-01 | 6.83E-01 |
| RCOR3       | 0.09  | 6.59E-01 | 1.00E+00 | -0.34 | 1.27E-01 | 6.83E-01 |
| MLLT10P1    | 0.85  | 3.27E-01 | 1.00E+00 | -1.14 | 1.27E-01 | 6.84E-01 |
| SEPT7P2     | 0.19  | 5.08E-01 | 1.00E+00 | -0.40 | 1.27E-01 | 6.84E-01 |
| RNF7        | 0.07  | 7.12E-01 | 1.00E+00 | -0.47 | 1.28E-01 | 6.84E-01 |
| AP000943.2  | -4.64 | 4.20E-03 | 3.64E-01 | 2.08  | 1.28E-01 | 6.84E-01 |
| SERF1B      | -0.80 | 8.32E-02 | 1.00E+00 | -0.83 | 1.28E-01 | 6.84E-01 |
| ARHGAP45    | -0.16 | 5.98E-01 | 1.00E+00 | 0.99  | 1.28E-01 | 6.84E-01 |
| TIMP4       | 3.07  | 3.27E-02 | 1.00E+00 | -1.29 | 1.28E-01 | 6.84E-01 |
| BVES-AS1    | 0.22  | 8.80E-01 | 1.00E+00 | 1.83  | 1.28E-01 | 6.84E-01 |
| ATP13A5     | -1.12 | 8.13E-02 | 1.00E+00 | -1.20 | 1.28E-01 | 6.84E-01 |
| LINC02154   | -2.43 | 4.34E-01 | 1.00E+00 | 2.45  | 1.28E-01 | 6.85E-01 |
| AP3M1       | 0.20  | 3.61E-01 | 1.00E+00 | -0.28 | 1.28E-01 | 6.85E-01 |

|             |       |          |          |       |          |          |
|-------------|-------|----------|----------|-------|----------|----------|
| HLA-E       | 0.00  | 9.85E-01 | 1.00E+00 | 0.40  | 1.28E-01 | 6.85E-01 |
| XLOC_003641 | -0.98 | 5.26E-01 | 1.00E+00 | -1.49 | 1.28E-01 | 6.85E-01 |
| PGK1P2      | 0.84  | 8.06E-01 | 1.00E+00 | 1.07  | 1.28E-01 | 6.85E-01 |
| ARMT1       | 0.57  | 1.30E-01 | 1.00E+00 | -0.58 | 1.28E-01 | 6.86E-01 |
| LAMA2       | 0.49  | 2.66E-01 | 1.00E+00 | 0.78  | 1.28E-01 | 6.86E-01 |
| INTS11      | -0.21 | 3.99E-01 | 1.00E+00 | 0.27  | 1.28E-01 | 6.86E-01 |
| RPS2P46     | -0.24 | 3.70E-01 | 1.00E+00 | -0.81 | 1.28E-01 | 6.86E-01 |
| ZNF302      | 0.58  | 8.90E-02 | 1.00E+00 | -0.45 | 1.28E-01 | 6.86E-01 |
| LRRTM1      | 0.41  | 6.00E-01 | 1.00E+00 | -1.68 | 1.28E-01 | 6.86E-01 |
| FUOM        | 0.17  | 5.18E-01 | 1.00E+00 | 0.49  | 1.28E-01 | 6.86E-01 |
| LINC02273   | 2.36  | 1.03E-01 | 1.00E+00 | 1.79  | 1.28E-01 | 6.86E-01 |
| FAM187B2P   | -0.18 | 8.80E-01 | 1.00E+00 | -1.65 | 1.28E-01 | 6.86E-01 |
| PCYOX1      | 0.34  | 2.38E-01 | 1.00E+00 | -0.40 | 1.28E-01 | 6.86E-01 |
| FAM131C     | -0.38 | 3.48E-01 | 1.00E+00 | -1.24 | 1.29E-01 | 6.86E-01 |
| PAQR7       | 0.19  | 5.80E-01 | 1.00E+00 | 0.73  | 1.29E-01 | 6.86E-01 |
| AC095031.1  | 2.43  | 1.68E-01 | 1.00E+00 | -2.44 | 1.29E-01 | 6.86E-01 |
| IFT74       | -0.25 | 4.20E-01 | 1.00E+00 | -0.43 | 1.29E-01 | 6.86E-01 |
| FABP7       | 1.06  | 7.39E-01 | 1.00E+00 | -1.28 | 1.29E-01 | 6.86E-01 |
| AHCTF1P1    | -1.36 | 2.62E-01 | 1.00E+00 | -0.73 | 1.29E-01 | 6.86E-01 |
| HMGN2       | -0.21 | 1.92E-01 | 1.00E+00 | -0.28 | 1.29E-01 | 6.86E-01 |
| KRT34       | -3.31 | 3.14E-01 | 1.00E+00 | 2.22  | 1.29E-01 | 6.86E-01 |
| SEC14L6     | 1.16  | 1.72E-01 | 1.00E+00 | -1.43 | 1.29E-01 | 6.86E-01 |
| HOXC5       | 1.05  | 2.41E-01 | 1.00E+00 | 0.87  | 1.29E-01 | 6.86E-01 |
| NHLH2       | -0.22 | 6.19E-01 | 1.00E+00 | -1.09 | 1.29E-01 | 6.86E-01 |
| TRHDE-AS1   | 3.31  | 1.65E-03 | 2.25E-01 | -1.43 | 1.29E-01 | 6.86E-01 |
| HORMAD2-AS1 | -2.27 | 4.87E-01 | 1.00E+00 | -1.69 | 1.29E-01 | 6.86E-01 |
| DGCR5       | -0.46 | 5.10E-01 | 1.00E+00 | -1.06 | 1.29E-01 | 6.86E-01 |
| ACSL4       | 0.07  | 8.31E-01 | 1.00E+00 | 0.48  | 1.29E-01 | 6.86E-01 |
| AC138150.1  | -0.25 | 9.41E-01 | 1.00E+00 | 1.07  | 1.29E-01 | 6.86E-01 |
| TBKBP1      | -0.14 | 6.69E-01 | 1.00E+00 | 1.04  | 1.29E-01 | 6.86E-01 |
| RNF175      | 0.08  | 9.11E-01 | 1.00E+00 | 1.03  | 1.29E-01 | 6.86E-01 |
| LINC00844   | 0.59  | 6.94E-01 | 1.00E+00 | -1.59 | 1.29E-01 | 6.86E-01 |

|                   |       |          |          |       |          |          |
|-------------------|-------|----------|----------|-------|----------|----------|
| <b>SLITRK4</b>    | 0.78  | 8.75E-02 | 1.00E+00 | 0.82  | 1.29E-01 | 6.86E-01 |
| <b>ANKRD20A5P</b> | -1.19 | 4.33E-01 | 1.00E+00 | 1.27  | 1.29E-01 | 6.86E-01 |
| <b>BBS2</b>       | 0.26  | 2.70E-01 | 1.00E+00 | -0.30 | 1.29E-01 | 6.86E-01 |
| <b>GLI4</b>       | -0.02 | 9.49E-01 | 1.00E+00 | -0.51 | 1.29E-01 | 6.86E-01 |
| <b>LINC02586</b>  | 0.61  | 7.33E-01 | 1.00E+00 | -2.05 | 1.29E-01 | 6.86E-01 |
| <b>ENKUR</b>      | -3.06 | 1.41E-01 | 1.00E+00 | 1.91  | 1.29E-01 | 6.86E-01 |
| <b>ASS1P12</b>    | -1.02 | 3.10E-01 | 1.00E+00 | 1.43  | 1.29E-01 | 6.86E-01 |
| <b>AC102953.2</b> | -0.20 | 7.96E-01 | 1.00E+00 | 1.64  | 1.29E-01 | 6.86E-01 |
| <b>AL031055.1</b> | -1.16 | 5.14E-01 | 1.00E+00 | -1.35 | 1.29E-01 | 6.87E-01 |
| <b>CHCHD1</b>     | 0.19  | 3.48E-01 | 1.00E+00 | -0.29 | 1.29E-01 | 6.87E-01 |
| <b>SERPINA3</b>   | -3.07 | 3.47E-01 | 1.00E+00 | 2.17  | 1.29E-01 | 6.87E-01 |
| <b>CPNE7</b>      | -0.86 | 1.39E-01 | 1.00E+00 | 1.64  | 1.29E-01 | 6.87E-01 |
| <b>CFLAR-AS1</b>  | -1.78 | 2.91E-01 | 1.00E+00 | 1.13  | 1.29E-01 | 6.87E-01 |
| <b>GLP2R</b>      | 1.93  | 2.09E-01 | 1.00E+00 | -1.92 | 1.29E-01 | 6.87E-01 |
| <b>MAP3K2</b>     | -0.12 | 6.56E-01 | 1.00E+00 | -0.32 | 1.30E-01 | 6.87E-01 |
| <b>ADH5P4</b>     | NA    | NA       | NA       | -0.99 | 1.30E-01 | 6.87E-01 |
| <b>PXDNL</b>      | -0.57 | 5.21E-01 | 1.00E+00 | 1.21  | 1.30E-01 | 6.87E-01 |
| <b>NOP56P1</b>    | 0.43  | 9.03E-01 | 1.00E+00 | 1.99  | 1.30E-01 | 6.87E-01 |
| <b>LINC01355</b>  | 1.10  | 5.54E-01 | 1.00E+00 | -1.50 | 1.30E-01 | 6.87E-01 |
| <b>CEBPE</b>      | -1.68 | 4.39E-01 | 1.00E+00 | 2.18  | 1.30E-01 | 6.87E-01 |
| <b>TCIRG1</b>     | -0.01 | 9.65E-01 | 1.00E+00 | 0.91  | 1.30E-01 | 6.87E-01 |
| <b>ZNF346</b>     | -0.33 | 1.05E-01 | 1.00E+00 | 0.31  | 1.30E-01 | 6.88E-01 |
| <b>C5orf17</b>    | -1.75 | 1.61E-01 | 1.00E+00 | -1.82 | 1.30E-01 | 6.88E-01 |
| <b>PPM1F</b>      | 0.07  | 8.41E-01 | 1.00E+00 | 0.85  | 1.30E-01 | 6.88E-01 |
| <b>G3899</b>      | -0.18 | 8.38E-01 | 1.00E+00 | 1.27  | 1.30E-01 | 6.88E-01 |
| <b>MIR29B2CHG</b> | 1.31  | 4.10E-02 | 1.00E+00 | 0.74  | 1.30E-01 | 6.88E-01 |
| <b>SERPINE2</b>   | -0.07 | 8.40E-01 | 1.00E+00 | 0.69  | 1.30E-01 | 6.88E-01 |
| <b>SACS</b>       | -0.09 | 6.97E-01 | 1.00E+00 | 0.77  | 1.30E-01 | 6.88E-01 |
| <b>HOTAIRM1</b>   | -0.52 | 2.56E-01 | 1.00E+00 | -0.69 | 1.30E-01 | 6.88E-01 |
| <b>NDUFS5</b>     | -0.03 | 8.47E-01 | 1.00E+00 | -0.37 | 1.30E-01 | 6.88E-01 |
| <b>RRAGA</b>      | -0.05 | 7.46E-01 | 1.00E+00 | -0.24 | 1.30E-01 | 6.89E-01 |
| <b>AC113404.3</b> | 0.18  | 7.74E-01 | 1.00E+00 | -0.58 | 1.31E-01 | 6.90E-01 |

|                      |        |          |          |       |          |          |
|----------------------|--------|----------|----------|-------|----------|----------|
| <b>AC004988.1</b>    | -0.55  | 8.24E-01 | 1.00E+00 | 2.18  | 1.31E-01 | 6.90E-01 |
| <b>ABCC6P1</b>       | -1.77  | 4.54E-01 | 1.00E+00 | -1.53 | 1.31E-01 | 6.90E-01 |
| <b>SEC61A1</b>       | -0.05  | 7.65E-01 | 1.00E+00 | 0.50  | 1.31E-01 | 6.90E-01 |
| <b>RPL5P23</b>       | -1.02  | 7.64E-01 | 1.00E+00 | -0.96 | 1.31E-01 | 6.90E-01 |
| <b>KIF1BP</b>        | 0.10   | 6.63E-01 | 1.00E+00 | -0.39 | 1.31E-01 | 6.91E-01 |
| <b>HMGA1P2</b>       | -0.80  | 5.52E-01 | 1.00E+00 | 1.21  | 1.31E-01 | 6.91E-01 |
| <b>ARFGAP1</b>       | -0.04  | 8.49E-01 | 1.00E+00 | 0.79  | 1.31E-01 | 6.91E-01 |
| <b>MGAT1</b>         | -0.04  | 8.09E-01 | 1.00E+00 | 0.60  | 1.31E-01 | 6.91E-01 |
| <b>BDNF</b>          | -0.18  | 7.42E-01 | 1.00E+00 | 0.82  | 1.31E-01 | 6.91E-01 |
| <b>CNDP2</b>         | 0.18   | 4.08E-01 | 1.00E+00 | 0.48  | 1.31E-01 | 6.91E-01 |
| <b>RSPO2</b>         | -15.92 | 3.27E-06 | 1.12E-03 | -3.07 | 1.31E-01 | 6.91E-01 |
| <b>C2orf92</b>       | -0.37  | 6.38E-01 | 1.00E+00 | -1.25 | 1.31E-01 | 6.91E-01 |
| <b>HIST1H2AH</b>     | 2.14   | 3.70E-01 | 1.00E+00 | -1.18 | 1.31E-01 | 6.91E-01 |
| <b>ZNF282</b>        | -0.34  | 1.23E-01 | 1.00E+00 | 0.98  | 1.31E-01 | 6.91E-01 |
| <b>G26269</b>        | -2.13  | 9.45E-02 | 1.00E+00 | -1.67 | 1.31E-01 | 6.92E-01 |
| <b>TMEM251</b>       | 0.30   | 3.87E-01 | 1.00E+00 | -0.61 | 1.31E-01 | 6.92E-01 |
| <b>SACM1L</b>        | 0.35   | 2.51E-01 | 1.00E+00 | -0.43 | 1.32E-01 | 6.92E-01 |
| <b>SPAG17</b>        | 0.25   | 7.27E-01 | 1.00E+00 | 1.33  | 1.32E-01 | 6.92E-01 |
| <b>HIGD1A</b>        | 0.29   | 2.80E-01 | 1.00E+00 | -0.73 | 1.32E-01 | 6.92E-01 |
| <b>SEMA6D</b>        | 0.53   | 2.85E-01 | 1.00E+00 | 0.84  | 1.32E-01 | 6.92E-01 |
| <b>G16199</b>        | -0.49  | 6.82E-01 | 1.00E+00 | 1.43  | 1.32E-01 | 6.92E-01 |
| <b>NCKAP1</b>        | 0.19   | 3.12E-01 | 1.00E+00 | -0.44 | 1.32E-01 | 6.92E-01 |
| <b>AC021237.1</b>    | NA     | NA       | NA       | 4.15  | 1.32E-01 | 6.92E-01 |
| <b>SYNPO</b>         | -0.14  | 7.86E-01 | 1.00E+00 | 1.20  | 1.32E-01 | 6.92E-01 |
| <b>PRTFDC1</b>       | 0.86   | 7.09E-02 | 1.00E+00 | 0.63  | 1.32E-01 | 6.92E-01 |
| <b>EFCAB6-AS1</b>    | -1.73  | 5.30E-01 | 1.00E+00 | -2.37 | 1.32E-01 | 6.92E-01 |
| <b>DDN-AS1</b>       | 0.64   | 5.89E-01 | 1.00E+00 | 1.18  | 1.32E-01 | 6.92E-01 |
| <b>ZNF532</b>        | -0.02  | 9.47E-01 | 1.00E+00 | 0.68  | 1.32E-01 | 6.92E-01 |
| <b>ZNF816</b>        | 0.04   | 9.15E-01 | 1.00E+00 | -0.67 | 1.32E-01 | 6.92E-01 |
| <b>HPCAL4</b>        | -1.98  | 1.27E-01 | 1.00E+00 | 2.05  | 1.32E-01 | 6.92E-01 |
| <b>RP11-231C14.4</b> | -0.14  | 8.61E-01 | 1.00E+00 | 0.91  | 1.32E-01 | 6.92E-01 |
| <b>LINC02542</b>     | 0.35   | 4.74E-01 | 1.00E+00 | -1.07 | 1.32E-01 | 6.92E-01 |

|                   |        |          |          |       |          |          |
|-------------------|--------|----------|----------|-------|----------|----------|
| <b>LYPD6</b>      | -0.26  | 6.44E-01 | 1.00E+00 | 1.23  | 1.32E-01 | 6.92E-01 |
| <b>G39805</b>     | -0.64  | 7.42E-01 | 1.00E+00 | -2.39 | 1.32E-01 | 6.92E-01 |
| <b>NAF1</b>       | -0.11  | 5.89E-01 | 1.00E+00 | 0.39  | 1.32E-01 | 6.92E-01 |
| <b>BTNL9</b>      | 0.50   | 4.32E-01 | 1.00E+00 | -1.21 | 1.32E-01 | 6.92E-01 |
| <b>CBY1</b>       | 0.33   | 2.06E-01 | 1.00E+00 | -0.52 | 1.32E-01 | 6.92E-01 |
| <b>TAOK3</b>      | -0.04  | 8.31E-01 | 1.00E+00 | 0.23  | 1.32E-01 | 6.92E-01 |
| <b>TAB2</b>       | -0.07  | 6.72E-01 | 1.00E+00 | 0.54  | 1.32E-01 | 6.93E-01 |
| <b>ACBD3</b>      | -0.07  | 7.69E-01 | 1.00E+00 | -0.49 | 1.32E-01 | 6.93E-01 |
| <b>RSPH1</b>      | -0.29  | 5.72E-01 | 1.00E+00 | -0.84 | 1.32E-01 | 6.93E-01 |
| <b>ZNF888</b>     | 0.08   | 8.20E-01 | 1.00E+00 | 0.56  | 1.32E-01 | 6.93E-01 |
| <b>SST</b>        | -17.65 | 9.48E-13 | 6.73E-10 | 2.65  | 1.32E-01 | 6.93E-01 |
| <b>MRPL23</b>     | -0.17  | 4.14E-01 | 1.00E+00 | -0.74 | 1.33E-01 | 6.93E-01 |
| <b>ATP5F1A</b>    | -0.03  | 9.03E-01 | 1.00E+00 | -0.29 | 1.33E-01 | 6.93E-01 |
| <b>DTWD2</b>      | -0.18  | 4.54E-01 | 1.00E+00 | -0.60 | 1.33E-01 | 6.94E-01 |
| <b>CLEC12A</b>    | 0.37   | 7.49E-01 | 1.00E+00 | 1.35  | 1.33E-01 | 6.94E-01 |
| <b>POU3F1</b>     | -0.47  | 3.02E-01 | 1.00E+00 | -1.09 | 1.33E-01 | 6.94E-01 |
| <b>ANGPT2</b>     | 0.43   | 4.10E-01 | 1.00E+00 | 0.86  | 1.33E-01 | 6.95E-01 |
| <b>OPA3</b>       | -0.37  | 7.84E-02 | 1.00E+00 | 0.47  | 1.33E-01 | 6.95E-01 |
| <b>C11orf80</b>   | 0.14   | 6.24E-01 | 1.00E+00 | -0.69 | 1.33E-01 | 6.95E-01 |
| <b>MRNIP</b>      | 0.28   | 4.61E-01 | 1.00E+00 | 0.36  | 1.33E-01 | 6.95E-01 |
| <b>LINC02575</b>  | -0.13  | 9.47E-01 | 1.00E+00 | 2.10  | 1.33E-01 | 6.95E-01 |
| <b>ZC3HAV1L</b>   | -0.83  | 5.20E-02 | 1.00E+00 | -0.54 | 1.33E-01 | 6.95E-01 |
| <b>HSPB7</b>      | 1.49   | 5.08E-02 | 1.00E+00 | -1.02 | 1.33E-01 | 6.95E-01 |
| <b>RCCD1</b>      | -0.29  | 2.99E-01 | 1.00E+00 | -0.54 | 1.33E-01 | 6.95E-01 |
| <b>AGR3</b>       | -2.55  | 1.28E-01 | 1.00E+00 | -1.71 | 1.33E-01 | 6.95E-01 |
| <b>BIN2</b>       | -0.38  | 4.10E-01 | 1.00E+00 | 0.94  | 1.33E-01 | 6.95E-01 |
| <b>SNED1</b>      | 0.61   | 1.22E-01 | 1.00E+00 | 1.13  | 1.33E-01 | 6.95E-01 |
| <b>AC011374.1</b> | 0.03   | 9.40E-01 | 1.00E+00 | -0.81 | 1.33E-01 | 6.95E-01 |
| <b>AC096887.1</b> | -0.62  | 6.51E-01 | 1.00E+00 | 0.93  | 1.33E-01 | 6.95E-01 |
| <b>CENPT</b>      | 0.05   | 8.38E-01 | 1.00E+00 | 0.30  | 1.33E-01 | 6.95E-01 |
| <b>RCL1</b>       | -0.13  | 6.75E-01 | 1.00E+00 | -0.32 | 1.33E-01 | 6.95E-01 |
| <b>TMA7</b>       | 0.33   | 2.39E-01 | 1.00E+00 | -0.95 | 1.33E-01 | 6.95E-01 |



|                   |       |          |          |       |          |          |
|-------------------|-------|----------|----------|-------|----------|----------|
| <b>MINOS1</b>     | 0.15  | 7.11E-01 | 1.00E+00 | -0.68 | 1.33E-01 | 6.95E-01 |
| <b>AC116366.1</b> | -0.61 | 5.25E-01 | 1.00E+00 | 1.05  | 1.33E-01 | 6.95E-01 |
| <b>TBC1D22A</b>   | -0.03 | 8.80E-01 | 1.00E+00 | 0.43  | 1.33E-01 | 6.95E-01 |
| <b>PPIAP39</b>    | 0.65  | 2.23E-01 | 1.00E+00 | 1.05  | 1.33E-01 | 6.95E-01 |
| <b>AL161729.1</b> | -0.06 | 9.86E-01 | 1.00E+00 | -1.58 | 1.34E-01 | 6.95E-01 |
| <b>HERC2</b>      | -0.07 | 8.12E-01 | 1.00E+00 | 0.52  | 1.34E-01 | 6.95E-01 |
| <b>CCL26</b>      | -0.57 | 3.91E-01 | 1.00E+00 | 0.67  | 1.34E-01 | 6.95E-01 |
| <b>B9D2</b>       | -0.07 | 7.86E-01 | 1.00E+00 | 0.37  | 1.34E-01 | 6.95E-01 |
| <b>AC018553.1</b> | -0.20 | 5.80E-01 | 1.00E+00 | -0.71 | 1.34E-01 | 6.95E-01 |
| <b>CST7</b>       | -0.16 | 8.00E-01 | 1.00E+00 | 0.78  | 1.34E-01 | 6.95E-01 |
| <b>ATXN7L3</b>    | -0.29 | 2.47E-01 | 1.00E+00 | 1.08  | 1.34E-01 | 6.95E-01 |
| <b>NDUFB5</b>     | 0.07  | 7.71E-01 | 1.00E+00 | -0.43 | 1.34E-01 | 6.95E-01 |
| <b>AC009121.2</b> | -0.98 | 6.80E-01 | 1.00E+00 | 1.89  | 1.34E-01 | 6.95E-01 |
| <b>CHMP2B</b>     | 0.06  | 8.39E-01 | 1.00E+00 | -0.38 | 1.34E-01 | 6.95E-01 |
| <b>AC006441.4</b> | -0.44 | 4.78E-01 | 1.00E+00 | -1.11 | 1.34E-01 | 6.95E-01 |
| <b>AC136475.1</b> | 0.19  | 6.73E-01 | 1.00E+00 | 0.80  | 1.34E-01 | 6.95E-01 |
| <b>TM7SF2</b>     | 0.09  | 8.21E-01 | 1.00E+00 | -0.43 | 1.34E-01 | 6.95E-01 |
| <b>AL391684.1</b> | 2.22  | 1.48E-01 | 1.00E+00 | -1.35 | 1.34E-01 | 6.95E-01 |
| <b>FAM180A</b>    | 1.00  | 1.37E-02 | 7.37E-01 | 0.80  | 1.34E-01 | 6.95E-01 |
| <b>HMGA1</b>      | -0.42 | 2.01E-01 | 1.00E+00 | 0.55  | 1.34E-01 | 6.95E-01 |
| <b>RAB22A</b>     | 0.15  | 4.40E-01 | 1.00E+00 | -0.34 | 1.34E-01 | 6.95E-01 |
| <b>INSRR</b>      | 0.56  | 8.71E-01 | 1.00E+00 | 2.52  | 1.34E-01 | 6.95E-01 |
| <b>IGHV3-53</b>   | 4.84  | 1.62E-02 | 7.96E-01 | 2.66  | 1.34E-01 | 6.95E-01 |
| <b>SNCB</b>       | -4.83 | 5.10E-06 | 1.64E-03 | 1.67  | 1.34E-01 | 6.95E-01 |
| <b>PRPF39</b>     | 0.26  | 4.31E-01 | 1.00E+00 | -0.38 | 1.34E-01 | 6.95E-01 |
| <b>FAM66B</b>     | -1.32 | 3.04E-03 | 2.89E-01 | -1.76 | 1.34E-01 | 6.95E-01 |
| <b>RPL7P18</b>    | 2.54  | 1.31E-01 | 1.00E+00 | 2.05  | 1.34E-01 | 6.95E-01 |
| <b>BLACAT1</b>    | -3.06 | 8.04E-02 | 1.00E+00 | 2.50  | 1.34E-01 | 6.95E-01 |
| <b>BMS1P9</b>     | -1.47 | 3.24E-01 | 1.00E+00 | -0.75 | 1.34E-01 | 6.95E-01 |
| <b>MRPS16</b>     | -0.07 | 6.90E-01 | 1.00E+00 | -0.25 | 1.34E-01 | 6.95E-01 |
| <b>SSR2</b>       | -0.02 | 8.97E-01 | 1.00E+00 | 0.22  | 1.34E-01 | 6.95E-01 |
| <b>AIP</b>        | 0.17  | 4.60E-01 | 1.00E+00 | 0.42  | 1.34E-01 | 6.95E-01 |

|                    |       |          |          |       |          |          |
|--------------------|-------|----------|----------|-------|----------|----------|
| <b>AC009123.1</b>  | 0.56  | 4.33E-01 | 1.00E+00 | -1.36 | 1.34E-01 | 6.95E-01 |
| <b>PLEK</b>        | 0.14  | 8.20E-01 | 1.00E+00 | 1.04  | 1.34E-01 | 6.95E-01 |
| <b>AL356747.1</b>  | -2.53 | 4.55E-01 | 1.00E+00 | 2.06  | 1.34E-01 | 6.95E-01 |
| <b>SLC25A33</b>    | 0.33  | 5.94E-01 | 1.00E+00 | -1.08 | 1.35E-01 | 6.95E-01 |
| <b>STX8</b>        | -0.03 | 8.31E-01 | 1.00E+00 | -0.50 | 1.35E-01 | 6.95E-01 |
| <b>CES5A</b>       | -1.52 | 1.02E-01 | 1.00E+00 | -1.34 | 1.35E-01 | 6.95E-01 |
| <b>LHB</b>         | -3.26 | 5.93E-02 | 1.00E+00 | 1.83  | 1.35E-01 | 6.95E-01 |
| <b>SCGB2A1</b>     | -0.32 | 7.51E-01 | 1.00E+00 | -1.50 | 1.35E-01 | 6.95E-01 |
| <b>OBSCN-AS1</b>   | -0.26 | 8.31E-01 | 1.00E+00 | 1.19  | 1.35E-01 | 6.96E-01 |
| <b>AC079465.1</b>  | 0.40  | 6.67E-01 | 1.00E+00 | -1.74 | 1.35E-01 | 6.96E-01 |
| <b>UCHL5</b>       | 0.01  | 9.79E-01 | 1.00E+00 | -0.47 | 1.35E-01 | 6.96E-01 |
| <b>WWTR1-IT1</b>   | -1.28 | 4.21E-01 | 1.00E+00 | 1.75  | 1.35E-01 | 6.96E-01 |
| <b>HSPE1P3</b>     | NA    | NA       | NA       | -1.06 | 1.35E-01 | 6.96E-01 |
| <b>LINC01770</b>   | 0.35  | 5.55E-01 | 1.00E+00 | -0.76 | 1.35E-01 | 6.96E-01 |
| <b>OGFRL1</b>      | -0.05 | 8.57E-01 | 1.00E+00 | -0.58 | 1.35E-01 | 6.96E-01 |
| <b>ZNF419</b>      | 0.17  | 4.99E-01 | 1.00E+00 | 0.32  | 1.35E-01 | 6.96E-01 |
| <b>XLOC_004803</b> | -0.67 | 8.96E-02 | 1.00E+00 | 0.91  | 1.35E-01 | 6.96E-01 |
| <b>DNTTIP1</b>     | -0.10 | 6.92E-01 | 1.00E+00 | -0.75 | 1.35E-01 | 6.96E-01 |
| <b>AC079610.2</b>  | -0.01 | 9.91E-01 | 1.00E+00 | -1.10 | 1.35E-01 | 6.96E-01 |
| <b>PLEKHG4B</b>    | 0.10  | 8.88E-01 | 1.00E+00 | 1.12  | 1.35E-01 | 6.96E-01 |
| <b>SESN2</b>       | 0.09  | 6.83E-01 | 1.00E+00 | 0.71  | 1.35E-01 | 6.96E-01 |
| <b>RPL8</b>        | 0.02  | 9.40E-01 | 1.00E+00 | 0.39  | 1.35E-01 | 6.96E-01 |
| <b>CLCN3P1</b>     | 0.95  | 2.29E-01 | 1.00E+00 | -1.03 | 1.35E-01 | 6.96E-01 |
| <b>NKAIN2</b>      | -1.31 | 6.39E-02 | 1.00E+00 | 1.60  | 1.35E-01 | 6.96E-01 |
| <b>SYDE1</b>       | 0.19  | 6.21E-01 | 1.00E+00 | 1.08  | 1.35E-01 | 6.96E-01 |
| <b>LANCL3</b>      | 0.26  | 5.27E-01 | 1.00E+00 | 0.71  | 1.35E-01 | 6.96E-01 |
| <b>DUX4L50</b>     | 0.44  | 5.51E-01 | 1.00E+00 | 0.62  | 1.35E-01 | 6.96E-01 |
| <b>AC068533.2</b>  | -0.13 | 8.89E-01 | 1.00E+00 | -0.92 | 1.35E-01 | 6.96E-01 |
| <b>CSTF3</b>       | 0.10  | 6.34E-01 | 1.00E+00 | -0.32 | 1.35E-01 | 6.96E-01 |
| <b>SEC14L2</b>     | -0.56 | 1.37E-01 | 1.00E+00 | 0.66  | 1.35E-01 | 6.96E-01 |
| <b>ACKR4</b>       | 0.57  | 1.43E-01 | 1.00E+00 | 0.52  | 1.35E-01 | 6.96E-01 |
| <b>SERPINB1</b>    | -0.12 | 5.19E-01 | 1.00E+00 | 0.47  | 1.35E-01 | 6.96E-01 |

|            |       |          |          |       |          |          |
|------------|-------|----------|----------|-------|----------|----------|
| PSMG4      | -0.38 | 2.38E-01 | 1.00E+00 | -0.36 | 1.35E-01 | 6.96E-01 |
| TAMM41     | -0.12 | 6.61E-01 | 1.00E+00 | -0.37 | 1.35E-01 | 6.96E-01 |
| NF1        | 0.08  | 7.11E-01 | 1.00E+00 | 0.56  | 1.36E-01 | 6.96E-01 |
| CPEB2      | -0.25 | 5.29E-01 | 1.00E+00 | -0.43 | 1.36E-01 | 6.96E-01 |
| AC016245.1 | -1.83 | 5.29E-01 | 1.00E+00 | 2.52  | 1.36E-01 | 6.96E-01 |
| AC091965.4 | -1.78 | 4.86E-01 | 1.00E+00 | -1.74 | 1.36E-01 | 6.96E-01 |
| AL035461.2 | 3.64  | 1.34E-01 | 1.00E+00 | 0.99  | 1.36E-01 | 6.96E-01 |
| RBP4       | 4.42  | 5.88E-03 | 4.57E-01 | -1.38 | 1.36E-01 | 6.96E-01 |
| BLM        | -0.48 | 3.29E-01 | 1.00E+00 | 0.85  | 1.36E-01 | 6.96E-01 |
| G25594     | -0.12 | 8.26E-01 | 1.00E+00 | -1.42 | 1.36E-01 | 6.96E-01 |
| IL26       | 0.90  | 7.96E-01 | 1.00E+00 | 3.51  | 1.36E-01 | 6.96E-01 |
| AC010894.2 | -0.03 | 9.73E-01 | 1.00E+00 | -1.11 | 1.36E-01 | 6.96E-01 |
| CEACAM3    | -3.24 | 3.38E-01 | 1.00E+00 | 1.82  | 1.36E-01 | 6.97E-01 |
| DNAH100S   | -0.58 | 4.28E-01 | 1.00E+00 | -0.93 | 1.36E-01 | 6.97E-01 |
| DDIAS      | -0.10 | 8.04E-01 | 1.00E+00 | -0.57 | 1.36E-01 | 6.97E-01 |
| AP001189.1 | -0.99 | 1.72E-01 | 1.00E+00 | 1.83  | 1.36E-01 | 6.97E-01 |
| SFXN5      | -0.50 | 5.48E-02 | 1.00E+00 | 0.60  | 1.36E-01 | 6.97E-01 |
| ATP8B2     | 0.59  | 1.59E-01 | 1.00E+00 | 1.28  | 1.36E-01 | 6.97E-01 |
| ZNF579     | -0.26 | 4.18E-01 | 1.00E+00 | 1.22  | 1.36E-01 | 6.97E-01 |
| ZNF737     | -0.03 | 9.41E-01 | 1.00E+00 | -0.65 | 1.36E-01 | 6.97E-01 |
| PRR22      | -0.46 | 6.44E-01 | 1.00E+00 | 1.14  | 1.36E-01 | 6.97E-01 |
| ZNF664     | 0.20  | 6.07E-01 | 1.00E+00 | 0.63  | 1.36E-01 | 6.97E-01 |
| PCBD1      | -0.01 | 9.86E-01 | 1.00E+00 | -0.31 | 1.36E-01 | 6.97E-01 |
| UTP23      | 0.19  | 3.85E-01 | 1.00E+00 | -0.24 | 1.36E-01 | 6.97E-01 |
| MTCH1      | 0.19  | 1.64E-01 | 1.00E+00 | -0.65 | 1.36E-01 | 6.97E-01 |
| LYRM9      | 0.44  | 2.19E-01 | 1.00E+00 | -0.49 | 1.37E-01 | 6.97E-01 |
| AC092490.1 | 3.00  | 1.20E-01 | 1.00E+00 | 1.33  | 1.37E-01 | 6.97E-01 |
| NCBP2L     | -3.14 | 3.87E-02 | 1.00E+00 | -2.01 | 1.37E-01 | 6.97E-01 |
| SSR3       | 0.06  | 7.51E-01 | 1.00E+00 | -0.25 | 1.37E-01 | 6.97E-01 |
| DDOST      | -0.05 | 7.51E-01 | 1.00E+00 | 0.22  | 1.37E-01 | 6.97E-01 |
| AC087482.1 | 2.65  | 9.84E-02 | 1.00E+00 | -1.53 | 1.37E-01 | 6.97E-01 |
| AL353150.1 | -1.78 | 1.96E-01 | 1.00E+00 | 1.07  | 1.37E-01 | 6.97E-01 |

|                    |       |          |          |       |          |          |
|--------------------|-------|----------|----------|-------|----------|----------|
| <b>ABCG8</b>       | -0.91 | 6.30E-01 | 1.00E+00 | 1.92  | 1.37E-01 | 6.97E-01 |
| <b>DCBLD1</b>      | 0.28  | 5.32E-01 | 1.00E+00 | 0.88  | 1.37E-01 | 6.97E-01 |
| <b>AC099063.4</b>  | -0.29 | 8.56E-01 | 1.00E+00 | 1.38  | 1.37E-01 | 6.97E-01 |
| <b>RNU4ATAC</b>    | 6.34  | 3.90E-04 | 8.19E-02 | -1.73 | 1.37E-01 | 6.97E-01 |
| <b>TSPAN4</b>      | 0.50  | 1.07E-01 | 1.00E+00 | 0.48  | 1.37E-01 | 6.97E-01 |
| <b>CICP14</b>      | -0.31 | 6.82E-01 | 1.00E+00 | 1.82  | 1.37E-01 | 6.97E-01 |
| <b>MYOT</b>        | -0.08 | 9.09E-01 | 1.00E+00 | -0.69 | 1.37E-01 | 6.97E-01 |
| <b>SHISAL2A</b>    | -1.79 | 5.39E-01 | 1.00E+00 | 1.96  | 1.37E-01 | 6.97E-01 |
| <b>AC008764.10</b> | 0.32  | 9.28E-01 | 1.00E+00 | 1.66  | 1.37E-01 | 6.97E-01 |
| <b>AL358332.1</b>  | 0.03  | 9.75E-01 | 1.00E+00 | -1.19 | 1.37E-01 | 6.97E-01 |
| <b>BLZF1</b>       | -0.03 | 8.88E-01 | 1.00E+00 | -0.40 | 1.37E-01 | 6.97E-01 |
| <b>GOLGA7B</b>     | -0.55 | 4.67E-02 | 1.00E+00 | 0.88  | 1.37E-01 | 6.97E-01 |
| <b>VPS8</b>        | -0.08 | 6.83E-01 | 1.00E+00 | 0.30  | 1.37E-01 | 6.97E-01 |
| <b>AC005726.3</b>  | -0.16 | 9.15E-01 | 1.00E+00 | 1.19  | 1.37E-01 | 6.97E-01 |
| <b>SH3YL1</b>      | -0.31 | 2.50E-01 | 1.00E+00 | -0.47 | 1.37E-01 | 6.97E-01 |
| <b>ATP11A</b>      | -0.24 | 2.16E-01 | 1.00E+00 | 0.80  | 1.37E-01 | 6.97E-01 |
| <b>ZNF271P</b>     | 0.04  | 8.94E-01 | 1.00E+00 | -0.49 | 1.37E-01 | 6.97E-01 |
| <b>MELTF-AS1</b>   | 0.74  | 5.40E-01 | 1.00E+00 | -1.14 | 1.37E-01 | 6.97E-01 |
| <b>AC018521.5</b>  | 0.08  | 8.74E-01 | 1.00E+00 | -0.57 | 1.37E-01 | 6.97E-01 |
| <b>CLIP2</b>       | -0.22 | 4.84E-01 | 1.00E+00 | 0.87  | 1.37E-01 | 6.97E-01 |
| <b>PPIEL</b>       | 0.27  | 7.33E-01 | 1.00E+00 | 0.75  | 1.37E-01 | 6.97E-01 |
| <b>AC135983.2</b>  | -0.17 | 7.74E-01 | 1.00E+00 | -0.65 | 1.37E-01 | 6.97E-01 |
| <b>TENM2</b>       | -0.95 | 7.05E-02 | 1.00E+00 | 0.94  | 1.37E-01 | 6.97E-01 |
| <b>METTL18</b>     | 0.46  | 1.06E-01 | 1.00E+00 | -0.65 | 1.37E-01 | 6.97E-01 |
| <b>GOLT1B</b>      | 0.40  | 1.35E-01 | 1.00E+00 | -0.46 | 1.37E-01 | 6.97E-01 |
| <b>DNAJC28</b>     | 0.36  | 3.27E-01 | 1.00E+00 | -0.67 | 1.37E-01 | 6.97E-01 |
| <b>AC011365.1</b>  | -0.45 | 8.46E-01 | 1.00E+00 | -1.78 | 1.37E-01 | 6.97E-01 |
| <b>S100PBP</b>     | -0.05 | 8.72E-01 | 1.00E+00 | 0.44  | 1.37E-01 | 6.97E-01 |
| <b>ZNF701</b>      | -0.40 | 2.33E-01 | 1.00E+00 | -0.60 | 1.37E-01 | 6.97E-01 |
| <b>RERE</b>        | -0.06 | 8.54E-01 | 1.00E+00 | 0.73  | 1.37E-01 | 6.97E-01 |
| <b>CHST1</b>       | -0.46 | 5.26E-01 | 1.00E+00 | 1.41  | 1.37E-01 | 6.97E-01 |
| <b>AC098614.4</b>  | -2.94 | 1.78E-01 | 1.00E+00 | -1.88 | 1.37E-01 | 6.97E-01 |

|                    |       |          |          |       |          |          |
|--------------------|-------|----------|----------|-------|----------|----------|
| <b>NLK</b>         | -0.21 | 3.89E-01 | 1.00E+00 | 0.77  | 1.38E-01 | 6.97E-01 |
| <b>MRTFA</b>       | -0.38 | 9.95E-02 | 1.00E+00 | 0.71  | 1.38E-01 | 6.97E-01 |
| <b>STK24P1</b>     | NA    | NA       | NA       | -1.30 | 1.38E-01 | 6.97E-01 |
| <b>PPIAP40</b>     | 0.54  | 8.30E-01 | 1.00E+00 | -1.17 | 1.38E-01 | 6.97E-01 |
| <b>SCARB2</b>      | 0.13  | 5.59E-01 | 1.00E+00 | 0.45  | 1.38E-01 | 6.97E-01 |
| <b>MACROD2</b>     | -0.42 | 1.71E-01 | 1.00E+00 | -0.67 | 1.38E-01 | 6.97E-01 |
| <b>MYO3B</b>       | 0.60  | 3.41E-01 | 1.00E+00 | 1.14  | 1.38E-01 | 6.97E-01 |
| <b>SGK2</b>        | 2.47  | 1.27E-01 | 1.00E+00 | -1.35 | 1.38E-01 | 6.97E-01 |
| <b>GDF5</b>        | 0.55  | 7.39E-01 | 1.00E+00 | 1.51  | 1.38E-01 | 6.97E-01 |
| <b>CNP</b>         | -0.37 | 2.66E-01 | 1.00E+00 | 0.48  | 1.38E-01 | 6.97E-01 |
| <b>TEP1</b>        | -0.36 | 2.11E-01 | 1.00E+00 | 0.91  | 1.38E-01 | 6.97E-01 |
| <b>AC064807.2</b>  | -1.05 | 2.03E-01 | 1.00E+00 | -1.18 | 1.38E-01 | 6.97E-01 |
| <b>ANKAR</b>       | -0.21 | 6.48E-01 | 1.00E+00 | -0.83 | 1.38E-01 | 6.97E-01 |
| <b>UBE2K</b>       | -0.01 | 9.80E-01 | 1.00E+00 | 0.22  | 1.38E-01 | 6.97E-01 |
| <b>CAPZA2</b>      | 0.16  | 5.41E-01 | 1.00E+00 | -0.51 | 1.38E-01 | 6.97E-01 |
| <b>ZNF578</b>      | 0.30  | 7.87E-01 | 1.00E+00 | -1.11 | 1.38E-01 | 6.97E-01 |
| <b>AC097658.1</b>  | -0.19 | 7.50E-01 | 1.00E+00 | 0.67  | 1.38E-01 | 6.97E-01 |
| <b>AL353719.1</b>  | -2.66 | 9.13E-02 | 1.00E+00 | -1.35 | 1.38E-01 | 6.97E-01 |
| <b>PTGER3</b>      | 0.63  | 1.10E-01 | 1.00E+00 | -0.60 | 1.38E-01 | 6.97E-01 |
| <b>AL132780.5</b>  | 0.02  | 9.96E-01 | 1.00E+00 | -2.52 | 1.38E-01 | 6.97E-01 |
| <b>LINC02585</b>   | 0.91  | 6.06E-01 | 1.00E+00 | 1.44  | 1.38E-01 | 6.97E-01 |
| <b>IGLON5</b>      | -0.93 | 2.04E-01 | 1.00E+00 | 1.54  | 1.38E-01 | 6.97E-01 |
| <b>TDRKH</b>       | -0.31 | 2.96E-01 | 1.00E+00 | -0.42 | 1.38E-01 | 6.97E-01 |
| <b>TMEM138</b>     | 0.01  | 9.65E-01 | 1.00E+00 | -0.40 | 1.38E-01 | 6.97E-01 |
| <b>BDKRB1</b>      | 0.37  | 4.62E-01 | 1.00E+00 | 0.84  | 1.38E-01 | 6.97E-01 |
| <b>ADPRM</b>       | -0.04 | 8.81E-01 | 1.00E+00 | -0.29 | 1.38E-01 | 6.97E-01 |
| <b>XLOC_008043</b> | 0.37  | 9.12E-01 | 1.00E+00 | -2.48 | 1.38E-01 | 6.97E-01 |
| <b>AP006621.3</b>  | -0.29 | 4.31E-01 | 1.00E+00 | -0.54 | 1.38E-01 | 6.97E-01 |
| <b>COX8A</b>       | -0.15 | 4.59E-01 | 1.00E+00 | -0.68 | 1.38E-01 | 6.97E-01 |
| <b>AC015871.3</b>  | -0.32 | 4.02E-01 | 1.00E+00 | -0.82 | 1.38E-01 | 6.97E-01 |
| <b>CAB39L</b>      | 0.27  | 3.24E-01 | 1.00E+00 | -0.50 | 1.38E-01 | 6.97E-01 |
| <b>CMTM8</b>       | 0.46  | 9.41E-02 | 1.00E+00 | -0.93 | 1.38E-01 | 6.98E-01 |

|            |       |          |          |       |          |          |
|------------|-------|----------|----------|-------|----------|----------|
| NPY1R      | 0.97  | 1.35E-01 | 1.00E+00 | -0.97 | 1.39E-01 | 6.98E-01 |
| DYSF       | -0.45 | 3.47E-01 | 1.00E+00 | 0.96  | 1.39E-01 | 6.98E-01 |
| IL20RA     | 0.49  | 1.39E-01 | 1.00E+00 | -0.77 | 1.39E-01 | 6.98E-01 |
| PCDH12     | 0.55  | 3.97E-01 | 1.00E+00 | 0.91  | 1.39E-01 | 6.98E-01 |
| BICRA      | -0.61 | 7.60E-02 | 1.00E+00 | 1.10  | 1.39E-01 | 6.98E-01 |
| ALG1       | 0.01  | 9.63E-01 | 1.00E+00 | 0.31  | 1.39E-01 | 6.98E-01 |
| RRH        | -1.05 | 6.00E-01 | 1.00E+00 | -2.83 | 1.39E-01 | 6.98E-01 |
| PHKB       | 0.26  | 4.08E-01 | 1.00E+00 | -0.31 | 1.39E-01 | 6.98E-01 |
| AL158163.2 | NA    | NA       | NA       | -1.49 | 1.39E-01 | 6.98E-01 |
| TMEM100    | 1.26  | 4.38E-03 | 3.74E-01 | 0.86  | 1.39E-01 | 6.98E-01 |
| RTL10      | 0.10  | 6.96E-01 | 1.00E+00 | 0.36  | 1.39E-01 | 6.98E-01 |
| H3F3AP4    | 0.01  | 9.87E-01 | 1.00E+00 | -0.59 | 1.39E-01 | 6.98E-01 |
| TMEM181    | 0.18  | 5.67E-01 | 1.00E+00 | -0.44 | 1.39E-01 | 6.98E-01 |
| RTL6       | 0.37  | 2.15E-01 | 1.00E+00 | 0.82  | 1.39E-01 | 6.98E-01 |
| PDAP1      | -0.14 | 4.91E-01 | 1.00E+00 | 0.38  | 1.39E-01 | 6.98E-01 |
| C15orf39   | -0.46 | 4.48E-02 | 1.00E+00 | 0.90  | 1.39E-01 | 6.98E-01 |
| WNK2       | -0.67 | 1.39E-02 | 7.46E-01 | -1.04 | 1.39E-01 | 6.98E-01 |
| RHPN1-AS1  | -0.14 | 7.94E-01 | 1.00E+00 | 1.15  | 1.39E-01 | 6.98E-01 |
| AC004846.1 | 0.98  | 9.26E-02 | 1.00E+00 | 1.12  | 1.39E-01 | 6.98E-01 |
| ANKRD65    | 0.13  | 8.35E-01 | 1.00E+00 | -0.71 | 1.39E-01 | 6.98E-01 |
| ABHD2      | 0.08  | 7.65E-01 | 1.00E+00 | 0.52  | 1.39E-01 | 6.98E-01 |
| GBP1       | -0.92 | 6.91E-02 | 1.00E+00 | 0.89  | 1.39E-01 | 6.98E-01 |
| HIKESHI    | -0.17 | 4.58E-01 | 1.00E+00 | -0.53 | 1.39E-01 | 6.98E-01 |
| AC020658.6 | 0.34  | 8.74E-01 | 1.00E+00 | 2.41  | 1.39E-01 | 6.98E-01 |
| AC018638.1 | -3.26 | 8.51E-02 | 1.00E+00 | 1.98  | 1.39E-01 | 6.98E-01 |
| FAM110B    | -0.03 | 9.40E-01 | 1.00E+00 | 0.59  | 1.39E-01 | 6.99E-01 |
| ITGB6      | 0.24  | 5.35E-01 | 1.00E+00 | 0.87  | 1.40E-01 | 6.99E-01 |
| AL034374.1 | 2.02  | 2.33E-01 | 1.00E+00 | -1.68 | 1.40E-01 | 6.99E-01 |
| TAX1BP1    | -0.07 | 7.52E-01 | 1.00E+00 | -0.36 | 1.40E-01 | 7.00E-01 |
| SFXN3      | -0.03 | 9.23E-01 | 1.00E+00 | 0.33  | 1.40E-01 | 7.00E-01 |
| HTR7       | -0.71 | 1.22E-01 | 1.00E+00 | 1.37  | 1.40E-01 | 7.00E-01 |
| NCAPH2     | -0.19 | 2.64E-01 | 1.00E+00 | 0.23  | 1.40E-01 | 7.01E-01 |

|                   |       |          |          |       |          |          |
|-------------------|-------|----------|----------|-------|----------|----------|
| <b>AC112236.1</b> | -0.40 | 7.78E-01 | 1.00E+00 | 1.37  | 1.40E-01 | 7.01E-01 |
| <b>AL162596.1</b> | 0.81  | 3.86E-01 | 1.00E+00 | 1.03  | 1.40E-01 | 7.01E-01 |
| <b>AC073896.2</b> | 0.97  | 4.07E-01 | 1.00E+00 | -1.20 | 1.40E-01 | 7.01E-01 |
| <b>EXD3</b>       | -0.06 | 7.92E-01 | 1.00E+00 | 0.38  | 1.40E-01 | 7.01E-01 |
| <b>ADCY10P1</b>   | -0.01 | 9.85E-01 | 1.00E+00 | 0.96  | 1.40E-01 | 7.01E-01 |
| <b>C6orf106</b>   | 0.11  | 4.56E-01 | 1.00E+00 | 0.64  | 1.40E-01 | 7.01E-01 |
| <b>PSMC4</b>      | -0.18 | 4.07E-01 | 1.00E+00 | 0.25  | 1.40E-01 | 7.01E-01 |
| <b>CD79B</b>      | 0.78  | 1.03E-01 | 1.00E+00 | 0.75  | 1.40E-01 | 7.01E-01 |
| <b>C3orf49</b>    | 1.15  | 2.64E-01 | 1.00E+00 | -1.16 | 1.40E-01 | 7.01E-01 |
| <b>ZNF423</b>     | 0.18  | 7.04E-01 | 1.00E+00 | 0.65  | 1.40E-01 | 7.01E-01 |
| <b>AKR1B1</b>     | 0.03  | 9.30E-01 | 1.00E+00 | 0.44  | 1.40E-01 | 7.01E-01 |
| <b>AC073869.1</b> | 0.15  | 7.48E-01 | 1.00E+00 | 0.64  | 1.40E-01 | 7.01E-01 |
| <b>UXT</b>        | -0.04 | 8.64E-01 | 1.00E+00 | -0.42 | 1.41E-01 | 7.01E-01 |
| <b>TYMSOS</b>     | -1.78 | 4.12E-01 | 1.00E+00 | 0.75  | 1.41E-01 | 7.01E-01 |
| <b>PMS2</b>       | 0.24  | 3.45E-01 | 1.00E+00 | -0.29 | 1.41E-01 | 7.01E-01 |
| <b>EXO5</b>       | -0.14 | 6.73E-01 | 1.00E+00 | 0.44  | 1.41E-01 | 7.01E-01 |
| <b>PLBD2</b>      | -0.03 | 9.16E-01 | 1.00E+00 | 0.78  | 1.41E-01 | 7.01E-01 |
| <b>ANGPTL6</b>    | -1.17 | 3.08E-01 | 1.00E+00 | 1.20  | 1.41E-01 | 7.01E-01 |
| <b>MINDY3</b>     | 0.27  | 2.15E-01 | 1.00E+00 | -0.36 | 1.41E-01 | 7.01E-01 |
| <b>SC5D</b>       | -0.05 | 8.22E-01 | 1.00E+00 | -0.51 | 1.41E-01 | 7.01E-01 |
| <b>RASAL2</b>     | -0.39 | 1.35E-01 | 1.00E+00 | 0.39  | 1.41E-01 | 7.01E-01 |
| <b>ATG4C</b>      | 0.12  | 7.25E-01 | 1.00E+00 | -0.46 | 1.41E-01 | 7.01E-01 |
| <b>ANXA7</b>      | 0.04  | 7.89E-01 | 1.00E+00 | -0.29 | 1.41E-01 | 7.01E-01 |
| <b>ANO7</b>       | -0.45 | 4.81E-01 | 1.00E+00 | 0.89  | 1.41E-01 | 7.01E-01 |
| <b>ZNF571-AS1</b> | -0.31 | 6.69E-01 | 1.00E+00 | -1.17 | 1.41E-01 | 7.01E-01 |
| <b>AIPL1</b>      | -3.59 | 2.87E-01 | 1.00E+00 | 2.56  | 1.41E-01 | 7.01E-01 |
| <b>MANBA</b>      | 0.27  | 3.53E-01 | 1.00E+00 | 0.53  | 1.41E-01 | 7.01E-01 |
| <b>ADGRV1</b>     | -0.52 | 2.42E-01 | 1.00E+00 | -0.90 | 1.41E-01 | 7.01E-01 |
| <b>PIEZO1</b>     | -0.03 | 8.82E-01 | 1.00E+00 | 0.87  | 1.41E-01 | 7.01E-01 |
| <b>NOP14-AS1</b>  | 0.18  | 4.32E-01 | 1.00E+00 | 0.27  | 1.41E-01 | 7.01E-01 |
| <b>APOE</b>       | -0.05 | 8.98E-01 | 1.00E+00 | 1.31  | 1.41E-01 | 7.01E-01 |
| <b>MKRN2OS</b>    | -0.32 | 5.00E-01 | 1.00E+00 | -0.75 | 1.41E-01 | 7.01E-01 |

|            |       |          |          |       |          |          |
|------------|-------|----------|----------|-------|----------|----------|
| CA5BP1     | -0.02 | 9.39E-01 | 1.00E+00 | 0.32  | 1.41E-01 | 7.01E-01 |
| LENG8      | -0.28 | 3.48E-01 | 1.00E+00 | 1.01  | 1.41E-01 | 7.01E-01 |
| TIMM8A     | 0.12  | 6.28E-01 | 1.00E+00 | -0.55 | 1.41E-01 | 7.01E-01 |
| CRYBB2     | -0.29 | 8.69E-01 | 1.00E+00 | 1.91  | 1.41E-01 | 7.01E-01 |
| UBALD1     | -0.26 | 3.55E-01 | 1.00E+00 | 0.70  | 1.41E-01 | 7.01E-01 |
| TMEM56     | 1.31  | 2.06E-02 | 8.94E-01 | -1.01 | 1.41E-01 | 7.01E-01 |
| VPS9D1-AS1 | -1.16 | 1.35E-01 | 1.00E+00 | 1.16  | 1.41E-01 | 7.01E-01 |
| KCNK6      | -0.09 | 8.02E-01 | 1.00E+00 | 0.70  | 1.41E-01 | 7.01E-01 |
| AP001273.1 | 1.10  | 2.24E-01 | 1.00E+00 | -1.86 | 1.41E-01 | 7.01E-01 |
| ZNF542P    | 0.33  | 3.87E-01 | 1.00E+00 | -0.56 | 1.41E-01 | 7.01E-01 |
| RTN3       | 0.05  | 7.97E-01 | 1.00E+00 | -0.42 | 1.41E-01 | 7.01E-01 |
| CAPG       | 0.02  | 9.42E-01 | 1.00E+00 | 0.45  | 1.41E-01 | 7.01E-01 |
| CDKN2B     | 0.21  | 5.69E-01 | 1.00E+00 | 0.38  | 1.41E-01 | 7.01E-01 |
| LRRC2-AS1  | 0.41  | 9.04E-01 | 1.00E+00 | -3.32 | 1.42E-01 | 7.01E-01 |
| FAM118A    | -0.06 | 8.20E-01 | 1.00E+00 | 0.40  | 1.42E-01 | 7.01E-01 |
| AL021392.1 | -0.81 | 2.15E-02 | 8.94E-01 | -1.15 | 1.42E-01 | 7.01E-01 |
| DNAJC19    | -0.07 | 7.23E-01 | 1.00E+00 | -0.48 | 1.42E-01 | 7.01E-01 |
| ALK        | 0.55  | 5.99E-01 | 1.00E+00 | 1.83  | 1.42E-01 | 7.01E-01 |
| PHACTR1    | -0.25 | 4.48E-01 | 1.00E+00 | 0.44  | 1.42E-01 | 7.01E-01 |
| OLR1       | -3.74 | 1.36E-01 | 1.00E+00 | 2.49  | 1.42E-01 | 7.01E-01 |
| ZNF852     | -0.11 | 6.93E-01 | 1.00E+00 | -0.56 | 1.42E-01 | 7.01E-01 |
| CRIM1      | 0.16  | 6.86E-01 | 1.00E+00 | 0.55  | 1.42E-01 | 7.01E-01 |
| PPP4R3B    | 0.20  | 4.53E-01 | 1.00E+00 | -0.23 | 1.42E-01 | 7.01E-01 |
| INSYN2     | -3.05 | 2.19E-02 | 8.96E-01 | -1.05 | 1.42E-01 | 7.01E-01 |
| PPP1R37    | -0.18 | 5.51E-01 | 1.00E+00 | 1.07  | 1.42E-01 | 7.01E-01 |
| RNU7-40P   | 2.04  | 1.44E-01 | 1.00E+00 | 1.57  | 1.42E-01 | 7.01E-01 |
| OR7E28P    | 0.32  | 7.59E-01 | 1.00E+00 | -1.14 | 1.42E-01 | 7.01E-01 |
| ETV3L      | -0.33 | 9.23E-01 | 1.00E+00 | 2.85  | 1.42E-01 | 7.01E-01 |
| PDE4B      | -0.41 | 3.69E-01 | 1.00E+00 | 0.52  | 1.42E-01 | 7.01E-01 |
| STK4       | 0.19  | 3.46E-01 | 1.00E+00 | 0.31  | 1.42E-01 | 7.01E-01 |
| DMBT1      | -3.84 | 8.73E-03 | 5.76E-01 | -2.33 | 1.42E-01 | 7.01E-01 |
| COX7C      | 0.12  | 4.85E-01 | 1.00E+00 | -0.48 | 1.42E-01 | 7.01E-01 |



|                   |       |          |          |       |          |          |
|-------------------|-------|----------|----------|-------|----------|----------|
| <b>OR7E47P</b>    | -0.47 | 4.26E-01 | 1.00E+00 | -1.01 | 1.42E-01 | 7.01E-01 |
| <b>SBDSP1</b>     | -0.09 | 6.84E-01 | 1.00E+00 | -0.42 | 1.42E-01 | 7.01E-01 |
| <b>ERF</b>        | -0.56 | 2.39E-02 | 9.18E-01 | 0.94  | 1.42E-01 | 7.01E-01 |
| <b>ALG1L10P</b>   | -1.53 | 2.39E-01 | 1.00E+00 | -1.17 | 1.42E-01 | 7.01E-01 |
| <b>PLEKHA1</b>    | 0.33  | 3.05E-01 | 1.00E+00 | -0.49 | 1.42E-01 | 7.01E-01 |
| <b>B3GNT8</b>     | 0.06  | 8.53E-01 | 1.00E+00 | 0.41  | 1.42E-01 | 7.01E-01 |
| <b>CTIF</b>       | -0.03 | 9.38E-01 | 1.00E+00 | 0.78  | 1.42E-01 | 7.01E-01 |
| <b>SOX21-AS1</b>  | -0.35 | 4.57E-01 | 1.00E+00 | -0.93 | 1.42E-01 | 7.01E-01 |
| <b>C6orf89</b>    | 0.15  | 4.31E-01 | 1.00E+00 | 0.32  | 1.42E-01 | 7.02E-01 |
| <b>THAP6</b>      | 0.52  | 1.05E-01 | 1.00E+00 | -0.36 | 1.42E-01 | 7.02E-01 |
| <b>PHACTR3</b>    | 0.13  | 8.31E-01 | 1.00E+00 | -1.03 | 1.42E-01 | 7.02E-01 |
| <b>RNF139</b>     | 0.00  | 9.96E-01 | 1.00E+00 | -0.39 | 1.42E-01 | 7.02E-01 |
| <b>EIF2B3</b>     | 0.06  | 7.88E-01 | 1.00E+00 | -0.43 | 1.42E-01 | 7.02E-01 |
| <b>AL022724.1</b> | -0.10 | 9.52E-01 | 1.00E+00 | 1.73  | 1.42E-01 | 7.02E-01 |
| <b>AL592429.1</b> | 0.31  | 8.08E-01 | 1.00E+00 | 1.66  | 1.42E-01 | 7.02E-01 |
| <b>MAPK1</b>      | 0.14  | 4.94E-01 | 1.00E+00 | -0.51 | 1.42E-01 | 7.02E-01 |
| <b>G41001</b>     | -2.70 | 1.87E-01 | 1.00E+00 | 1.24  | 1.42E-01 | 7.02E-01 |
| <b>DNASE1L3</b>   | -0.47 | 1.27E-01 | 1.00E+00 | 0.61  | 1.43E-01 | 7.02E-01 |
| <b>MIR497HG</b>   | 0.89  | 5.73E-01 | 1.00E+00 | 1.10  | 1.43E-01 | 7.02E-01 |
| <b>LMO7</b>       | 0.19  | 4.59E-01 | 1.00E+00 | 0.53  | 1.43E-01 | 7.02E-01 |
| <b>VCAM1</b>      | 0.33  | 4.69E-01 | 1.00E+00 | 0.90  | 1.43E-01 | 7.02E-01 |
| <b>VPS4A</b>      | -0.01 | 9.52E-01 | 1.00E+00 | -0.34 | 1.43E-01 | 7.02E-01 |
| <b>MAST1</b>      | -0.35 | 3.06E-01 | 1.00E+00 | -0.85 | 1.43E-01 | 7.02E-01 |
| <b>PPP1R42</b>    | -0.46 | 8.58E-01 | 1.00E+00 | 3.08  | 1.43E-01 | 7.02E-01 |
| <b>AL161725.1</b> | -0.08 | 9.62E-01 | 1.00E+00 | -1.39 | 1.43E-01 | 7.02E-01 |
| <b>AC003102.1</b> | -0.06 | 9.01E-01 | 1.00E+00 | 0.64  | 1.43E-01 | 7.02E-01 |
| <b>SPPL3</b>      | -0.17 | 5.85E-01 | 1.00E+00 | -0.59 | 1.43E-01 | 7.02E-01 |
| <b>SMAD3</b>      | 0.13  | 5.56E-01 | 1.00E+00 | 0.56  | 1.43E-01 | 7.02E-01 |
| <b>DLEU2L</b>     | 1.52  | 6.59E-01 | 1.00E+00 | -2.10 | 1.43E-01 | 7.02E-01 |
| <b>ASS1</b>       | -0.16 | 5.10E-01 | 1.00E+00 | -0.42 | 1.43E-01 | 7.02E-01 |
| <b>AL359762.3</b> | -0.10 | 9.75E-01 | 1.00E+00 | 1.72  | 1.43E-01 | 7.02E-01 |
| <b>AC026904.3</b> | -1.38 | 3.65E-01 | 1.00E+00 | -1.59 | 1.43E-01 | 7.02E-01 |

|                   |       |          |          |       |          |          |
|-------------------|-------|----------|----------|-------|----------|----------|
| <b>G25250</b>     | 0.07  | 9.44E-01 | 1.00E+00 | 1.45  | 1.43E-01 | 7.02E-01 |
| <b>PABPC1L</b>    | -1.79 | 6.56E-03 | 4.90E-01 | 1.33  | 1.43E-01 | 7.02E-01 |
| <b>UNC13A</b>     | -1.84 | 5.55E-01 | 1.00E+00 | 2.30  | 1.43E-01 | 7.02E-01 |
| <b>LGI2</b>       | 0.06  | 9.27E-01 | 1.00E+00 | 1.24  | 1.43E-01 | 7.02E-01 |
| <b>XCL1</b>       | -4.84 | 1.04E-03 | 1.67E-01 | 1.34  | 1.43E-01 | 7.02E-01 |
| <b>SIX4</b>       | -0.17 | 8.80E-01 | 1.00E+00 | 1.49  | 1.43E-01 | 7.02E-01 |
| <b>AL122125.1</b> | -3.47 | 3.03E-01 | 1.00E+00 | 2.06  | 1.43E-01 | 7.02E-01 |
| <b>AC005332.1</b> | 0.23  | 9.21E-01 | 1.00E+00 | 1.71  | 1.43E-01 | 7.02E-01 |
| <b>MYH13</b>      | -1.93 | 4.14E-01 | 1.00E+00 | 2.10  | 1.43E-01 | 7.02E-01 |
| <b>INCA1</b>      | -0.59 | 2.36E-01 | 1.00E+00 | 0.55  | 1.43E-01 | 7.02E-01 |
| <b>GPX4</b>       | 0.30  | 5.38E-01 | 1.00E+00 | -0.54 | 1.43E-01 | 7.02E-01 |
| <b>LILRA1</b>     | -1.06 | 2.13E-01 | 1.00E+00 | 1.84  | 1.43E-01 | 7.02E-01 |
| <b>MAN2B2</b>     | -0.06 | 8.31E-01 | 1.00E+00 | 0.54  | 1.43E-01 | 7.02E-01 |
| <b>GOLGA2</b>     | -0.12 | 6.03E-01 | 1.00E+00 | 0.58  | 1.43E-01 | 7.02E-01 |
| <b>PIGK</b>       | 0.13  | 6.06E-01 | 1.00E+00 | -0.49 | 1.43E-01 | 7.02E-01 |
| <b>PTGER4</b>     | 0.34  | 2.93E-01 | 1.00E+00 | 0.69  | 1.43E-01 | 7.02E-01 |
| <b>AL731577.2</b> | -0.23 | 6.61E-01 | 1.00E+00 | 1.09  | 1.44E-01 | 7.02E-01 |
| <b>HIST1H2BF</b>  | -3.23 | 1.57E-02 | 7.82E-01 | -1.47 | 1.44E-01 | 7.03E-01 |
| <b>IDNK</b>       | 0.18  | 5.16E-01 | 1.00E+00 | -0.52 | 1.44E-01 | 7.03E-01 |
| <b>REC8</b>       | -0.61 | 3.03E-01 | 1.00E+00 | 1.09  | 1.44E-01 | 7.03E-01 |
| <b>AC127024.8</b> | 0.90  | 7.96E-01 | 1.00E+00 | -1.72 | 1.44E-01 | 7.03E-01 |
| <b>ABCA13</b>     | -1.00 | 7.44E-02 | 1.00E+00 | -1.11 | 1.44E-01 | 7.03E-01 |
| <b>WDR60</b>      | 0.15  | 5.65E-01 | 1.00E+00 | 0.47  | 1.44E-01 | 7.03E-01 |
| <b>VPS39</b>      | 0.13  | 4.03E-01 | 1.00E+00 | 0.38  | 1.44E-01 | 7.03E-01 |
| <b>LRPAP1</b>     | -0.13 | 5.86E-01 | 1.00E+00 | 0.31  | 1.44E-01 | 7.03E-01 |
| <b>FAM19A2</b>    | -0.19 | 7.15E-01 | 1.00E+00 | -0.68 | 1.44E-01 | 7.03E-01 |
| <b>HNRNPLL</b>    | 0.00  | 9.96E-01 | 1.00E+00 | -0.53 | 1.44E-01 | 7.03E-01 |
| <b>AL358813.2</b> | 0.10  | 8.87E-01 | 1.00E+00 | 1.44  | 1.44E-01 | 7.03E-01 |
| <b>GAPLINC</b>    | -0.92 | 6.13E-01 | 1.00E+00 | 1.13  | 1.44E-01 | 7.03E-01 |
| <b>AC078795.1</b> | 0.76  | 8.20E-01 | 1.00E+00 | 1.89  | 1.44E-01 | 7.03E-01 |
| <b>ETFA</b>       | 0.12  | 5.64E-01 | 1.00E+00 | -0.36 | 1.44E-01 | 7.03E-01 |
| <b>AC114763.1</b> | -2.02 | 7.45E-02 | 1.00E+00 | -0.88 | 1.44E-01 | 7.03E-01 |

|             |       |          |          |       |          |          |
|-------------|-------|----------|----------|-------|----------|----------|
| CDA         | 0.12  | 7.34E-01 | 1.00E+00 | 0.58  | 1.44E-01 | 7.03E-01 |
| WASF4P      | -0.86 | 7.46E-01 | 1.00E+00 | -0.76 | 1.44E-01 | 7.03E-01 |
| UHRF1BP1    | 0.16  | 5.79E-01 | 1.00E+00 | 0.57  | 1.44E-01 | 7.03E-01 |
| XLOC_004201 | -1.29 | 7.00E-01 | 1.00E+00 | 1.77  | 1.44E-01 | 7.03E-01 |
| C22orf23    | -0.24 | 7.88E-01 | 1.00E+00 | 1.16  | 1.44E-01 | 7.03E-01 |
| XLOC_006645 | -0.76 | 3.86E-01 | 1.00E+00 | -0.83 | 1.44E-01 | 7.03E-01 |
| RNF216P1    | 0.16  | 5.38E-01 | 1.00E+00 | 0.25  | 1.44E-01 | 7.03E-01 |
| AC145207.5  | 0.10  | 8.68E-01 | 1.00E+00 | -0.91 | 1.44E-01 | 7.03E-01 |
| EFNB2       | -0.32 | 2.30E-01 | 1.00E+00 | -0.59 | 1.44E-01 | 7.03E-01 |
| MECR        | 0.01  | 9.70E-01 | 1.00E+00 | -0.36 | 1.44E-01 | 7.03E-01 |
| LINC01521   | 0.23  | 5.93E-01 | 1.00E+00 | 1.43  | 1.44E-01 | 7.03E-01 |
| EPN1        | -0.19 | 4.66E-01 | 1.00E+00 | 0.98  | 1.44E-01 | 7.03E-01 |
| MANSC1      | -0.09 | 5.58E-01 | 1.00E+00 | -0.26 | 1.44E-01 | 7.03E-01 |
| TNFRSF9     | -2.08 | 7.49E-02 | 1.00E+00 | 1.78  | 1.45E-01 | 7.03E-01 |
| ADAMTSL4    | 0.67  | 2.12E-01 | 1.00E+00 | 1.07  | 1.45E-01 | 7.03E-01 |
| AL358472.2  | 1.24  | 2.11E-01 | 1.00E+00 | -1.21 | 1.45E-01 | 7.03E-01 |
| CD36        | 2.39  | 5.06E-02 | 1.00E+00 | -1.02 | 1.45E-01 | 7.03E-01 |
| MTHFD2L     | 0.02  | 9.62E-01 | 1.00E+00 | -0.63 | 1.45E-01 | 7.03E-01 |
| AMER2       | -1.07 | 7.49E-01 | 1.00E+00 | -2.24 | 1.45E-01 | 7.03E-01 |
| CHPF        | -0.31 | 3.00E-01 | 1.00E+00 | 0.77  | 1.45E-01 | 7.03E-01 |
| LSM14B      | 0.01  | 9.64E-01 | 1.00E+00 | 1.00  | 1.45E-01 | 7.03E-01 |
| SOX9        | -0.06 | 9.27E-01 | 1.00E+00 | -0.80 | 1.45E-01 | 7.03E-01 |
| HOPX        | 0.49  | 3.74E-01 | 1.00E+00 | -0.91 | 1.45E-01 | 7.03E-01 |
| ZNF720      | -0.10 | 7.03E-01 | 1.00E+00 | -0.31 | 1.45E-01 | 7.03E-01 |
| GJB7        | -1.17 | 5.13E-01 | 1.00E+00 | 2.28  | 1.45E-01 | 7.03E-01 |
| PPIB        | -0.12 | 6.24E-01 | 1.00E+00 | 0.32  | 1.45E-01 | 7.03E-01 |
| MYLK2       | -3.68 | 7.20E-02 | 1.00E+00 | 2.73  | 1.45E-01 | 7.03E-01 |
| ZNF517      | 0.17  | 5.18E-01 | 1.00E+00 | 0.94  | 1.45E-01 | 7.03E-01 |
| XLOC_007084 | -1.64 | 3.97E-01 | 1.00E+00 | -2.37 | 1.45E-01 | 7.03E-01 |
| LCMT1-AS1   | 1.79  | 1.10E-01 | 1.00E+00 | 1.03  | 1.45E-01 | 7.03E-01 |
| NACC2       | 0.18  | 6.67E-01 | 1.00E+00 | 0.82  | 1.45E-01 | 7.03E-01 |
| AC092794.1  | 0.59  | 6.73E-01 | 1.00E+00 | 1.40  | 1.45E-01 | 7.03E-01 |

|                     |       |          |          |       |          |          |
|---------------------|-------|----------|----------|-------|----------|----------|
| <b>G16424</b>       | 0.18  | 9.43E-01 | 1.00E+00 | 2.29  | 1.45E-01 | 7.03E-01 |
| <b>AC025183.1</b>   | -1.11 | 2.38E-01 | 1.00E+00 | -1.07 | 1.45E-01 | 7.04E-01 |
| <b>IL1RAPL1</b>     | 0.15  | 8.87E-01 | 1.00E+00 | 1.54  | 1.45E-01 | 7.04E-01 |
| <b>GRB14</b>        | -0.01 | 9.93E-01 | 1.00E+00 | -0.84 | 1.45E-01 | 7.04E-01 |
| <b>XLOC_005254</b>  | -0.59 | 7.39E-01 | 1.00E+00 | -2.11 | 1.45E-01 | 7.04E-01 |
| <b>C21orf62-AS1</b> | 0.27  | 5.69E-01 | 1.00E+00 | -0.79 | 1.45E-01 | 7.04E-01 |
| <b>COX18</b>        | -0.09 | 7.08E-01 | 1.00E+00 | 0.39  | 1.45E-01 | 7.04E-01 |
| <b>FRMD3</b>        | 0.16  | 7.21E-01 | 1.00E+00 | -0.58 | 1.45E-01 | 7.04E-01 |
| <b>PCAT1</b>        | -0.04 | 9.45E-01 | 1.00E+00 | -0.57 | 1.45E-01 | 7.04E-01 |
| <b>LSM5</b>         | 0.16  | 4.54E-01 | 1.00E+00 | -0.65 | 1.45E-01 | 7.04E-01 |
| <b>AC092535.3</b>   | 0.12  | 9.59E-01 | 1.00E+00 | -1.60 | 1.46E-01 | 7.04E-01 |
| <b>GAB1</b>         | -0.11 | 6.65E-01 | 1.00E+00 | 0.46  | 1.46E-01 | 7.04E-01 |
| <b>ZMYND11</b>      | 0.04  | 8.50E-01 | 1.00E+00 | -0.23 | 1.46E-01 | 7.04E-01 |
| <b>SLC16A4</b>      | 1.14  | 5.71E-02 | 1.00E+00 | 0.77  | 1.46E-01 | 7.04E-01 |
| <b>NAV1</b>         | -0.18 | 5.04E-01 | 1.00E+00 | 0.61  | 1.46E-01 | 7.04E-01 |
| <b>TSGA10</b>       | -0.06 | 8.36E-01 | 1.00E+00 | -0.57 | 1.46E-01 | 7.04E-01 |
| <b>SP8</b>          | 0.02  | 9.77E-01 | 1.00E+00 | -1.45 | 1.46E-01 | 7.04E-01 |
| <b>XLOC_008855</b>  | -0.69 | 5.76E-01 | 1.00E+00 | 1.53  | 1.46E-01 | 7.04E-01 |
| <b>NDUFAF7</b>      | 0.22  | 3.95E-01 | 1.00E+00 | -0.37 | 1.46E-01 | 7.04E-01 |
| <b>SFN</b>          | -0.40 | 3.94E-01 | 1.00E+00 | 0.97  | 1.46E-01 | 7.04E-01 |
| <b>GPR89B</b>       | -0.28 | 4.74E-01 | 1.00E+00 | -0.30 | 1.46E-01 | 7.04E-01 |
| <b>UQCR11</b>       | -0.07 | 7.74E-01 | 1.00E+00 | -0.68 | 1.46E-01 | 7.04E-01 |
| <b>IPPK</b>         | -0.27 | 5.10E-01 | 1.00E+00 | 0.51  | 1.46E-01 | 7.04E-01 |
| <b>MIXL1</b>        | 0.44  | 8.39E-01 | 1.00E+00 | 0.84  | 1.46E-01 | 7.04E-01 |
| <b>LY96</b>         | 0.19  | 7.45E-01 | 1.00E+00 | 0.60  | 1.46E-01 | 7.04E-01 |
| <b>CFAP45</b>       | -1.00 | 7.34E-02 | 1.00E+00 | -0.65 | 1.46E-01 | 7.04E-01 |
| <b>SLC10A7</b>      | 0.14  | 5.84E-01 | 1.00E+00 | 0.43  | 1.46E-01 | 7.04E-01 |
| <b>GIGYF1</b>       | -0.21 | 3.13E-01 | 1.00E+00 | 0.79  | 1.46E-01 | 7.04E-01 |
| <b>MRPL17</b>       | -0.12 | 5.66E-01 | 1.00E+00 | 0.27  | 1.46E-01 | 7.04E-01 |
| <b>FBXW2</b>        | 0.30  | 1.24E-01 | 1.00E+00 | 0.19  | 1.46E-01 | 7.04E-01 |
| <b>XLOC_012338</b>  | 2.68  | 4.27E-01 | 1.00E+00 | 2.10  | 1.46E-01 | 7.04E-01 |
| <b>HIST1H3B</b>     | -0.59 | 7.51E-01 | 1.00E+00 | -1.63 | 1.46E-01 | 7.04E-01 |

|                   |       |          |          |       |          |          |
|-------------------|-------|----------|----------|-------|----------|----------|
| <b>SOX5</b>       | -0.26 | 3.96E-01 | 1.00E+00 | -0.55 | 1.46E-01 | 7.04E-01 |
| <b>SESN1</b>      | 0.30  | 3.22E-01 | 1.00E+00 | -0.50 | 1.46E-01 | 7.04E-01 |
| <b>G42257</b>     | -1.04 | 3.93E-01 | 1.00E+00 | -1.69 | 1.46E-01 | 7.04E-01 |
| <b>LINC02550</b>  | 0.45  | 8.39E-01 | 1.00E+00 | 1.89  | 1.46E-01 | 7.04E-01 |
| <b>ZNF557</b>     | -0.12 | 7.39E-01 | 1.00E+00 | -0.47 | 1.47E-01 | 7.04E-01 |
| <b>U62317.2</b>   | -0.19 | 8.10E-01 | 1.00E+00 | 1.00  | 1.47E-01 | 7.04E-01 |
| <b>MVB12B</b>     | -0.04 | 8.90E-01 | 1.00E+00 | 0.89  | 1.47E-01 | 7.04E-01 |
| <b>AC006504.1</b> | -2.07 | 2.10E-01 | 1.00E+00 | -1.78 | 1.47E-01 | 7.04E-01 |
| <b>AC112484.3</b> | 0.21  | 8.96E-01 | 1.00E+00 | 1.90  | 1.47E-01 | 7.04E-01 |
| <b>TMEM42</b>     | 0.42  | 1.37E-01 | 1.00E+00 | -0.53 | 1.47E-01 | 7.04E-01 |
| <b>IPMK</b>       | 0.16  | 6.47E-01 | 1.00E+00 | -0.59 | 1.47E-01 | 7.04E-01 |
| <b>CADM3</b>      | 0.65  | 1.71E-01 | 1.00E+00 | 0.98  | 1.47E-01 | 7.04E-01 |
| <b>LINC00299</b>  | 2.88  | 2.59E-01 | 1.00E+00 | 1.80  | 1.47E-01 | 7.04E-01 |
| <b>AC026250.1</b> | 1.07  | 2.78E-01 | 1.00E+00 | 1.60  | 1.47E-01 | 7.04E-01 |
| <b>SMIM30</b>     | -0.04 | 8.65E-01 | 1.00E+00 | -0.51 | 1.47E-01 | 7.04E-01 |
| <b>SERINC2</b>    | -0.04 | 9.01E-01 | 1.00E+00 | 0.53  | 1.47E-01 | 7.04E-01 |
| <b>AC093599.1</b> | -0.02 | 9.96E-01 | 1.00E+00 | 2.07  | 1.47E-01 | 7.04E-01 |
| <b>GDF6</b>       | 2.09  | 4.12E-02 | 1.00E+00 | 2.48  | 1.47E-01 | 7.04E-01 |
| <b>CD300C</b>     | -0.91 | 1.87E-01 | 1.00E+00 | 1.00  | 1.47E-01 | 7.04E-01 |
| <b>ZZEF1</b>      | 0.15  | 5.79E-01 | 1.00E+00 | 0.86  | 1.47E-01 | 7.04E-01 |
| <b>MMAA</b>       | 0.09  | 7.35E-01 | 1.00E+00 | -0.36 | 1.47E-01 | 7.04E-01 |
| <b>AC104461.1</b> | 0.43  | 9.01E-01 | 1.00E+00 | 1.95  | 1.47E-01 | 7.04E-01 |
| <b>RPS6KA6</b>    | 0.31  | 3.64E-01 | 1.00E+00 | -0.84 | 1.47E-01 | 7.04E-01 |
| <b>LINC02210</b>  | 0.22  | 5.09E-01 | 1.00E+00 | -0.41 | 1.47E-01 | 7.04E-01 |
| <b>PRRG2</b>      | -0.18 | 6.54E-01 | 1.00E+00 | 0.63  | 1.47E-01 | 7.04E-01 |
| <b>PLOD3</b>      | -0.13 | 6.15E-01 | 1.00E+00 | 0.64  | 1.47E-01 | 7.04E-01 |
| <b>ABCF1</b>      | -0.15 | 5.15E-01 | 1.00E+00 | 0.42  | 1.47E-01 | 7.04E-01 |
| <b>BCL2A1</b>     | -0.25 | 7.17E-01 | 1.00E+00 | 0.92  | 1.47E-01 | 7.04E-01 |
| <b>ODR4</b>       | 0.06  | 8.32E-01 | 1.00E+00 | -0.48 | 1.47E-01 | 7.04E-01 |
| <b>ATL2</b>       | 0.01  | 9.63E-01 | 1.00E+00 | -0.35 | 1.47E-01 | 7.04E-01 |
| <b>LGI1</b>       | 1.32  | 1.37E-01 | 1.00E+00 | 1.39  | 1.47E-01 | 7.04E-01 |
| <b>PTPN23</b>     | -0.33 | 1.37E-01 | 1.00E+00 | 0.86  | 1.47E-01 | 7.04E-01 |

|                   |       |          |          |       |          |          |
|-------------------|-------|----------|----------|-------|----------|----------|
| <b>OAS3</b>       | 0.11  | 8.70E-01 | 1.00E+00 | 1.05  | 1.47E-01 | 7.04E-01 |
| <b>P2RY11</b>     | -0.70 | 2.39E-03 | 2.47E-01 | 0.64  | 1.47E-01 | 7.04E-01 |
| <b>RAB3C</b>      | -0.23 | 8.10E-01 | 1.00E+00 | 1.10  | 1.47E-01 | 7.04E-01 |
| <b>MGAM</b>       | -2.15 | 8.82E-02 | 1.00E+00 | 2.38  | 1.47E-01 | 7.04E-01 |
| <b>LINC01003</b>  | 0.28  | 3.80E-01 | 1.00E+00 | -1.10 | 1.47E-01 | 7.04E-01 |
| <b>G27121</b>     | 1.18  | 2.06E-01 | 1.00E+00 | -1.01 | 1.48E-01 | 7.04E-01 |
| <b>PPP1R36</b>    | 0.34  | 3.91E-01 | 1.00E+00 | -0.86 | 1.48E-01 | 7.04E-01 |
| <b>FCN3</b>       | 0.42  | 5.61E-01 | 1.00E+00 | 1.42  | 1.48E-01 | 7.04E-01 |
| <b>ACE2</b>       | 0.13  | 9.69E-01 | 1.00E+00 | 1.42  | 1.48E-01 | 7.04E-01 |
| <b>TRBV29-1</b>   | 1.37  | 4.41E-01 | 1.00E+00 | 1.88  | 1.48E-01 | 7.04E-01 |
| <b>OPN1SW</b>     | 0.16  | 7.51E-01 | 1.00E+00 | 0.56  | 1.48E-01 | 7.04E-01 |
| <b>ZNF395</b>     | 0.24  | 4.38E-01 | 1.00E+00 | 0.42  | 1.48E-01 | 7.04E-01 |
| <b>G8455</b>      | 0.59  | 5.13E-01 | 1.00E+00 | 2.13  | 1.48E-01 | 7.04E-01 |
| <b>NPW</b>        | -1.45 | 3.27E-03 | 3.02E-01 | -0.81 | 1.48E-01 | 7.04E-01 |
| <b>OR51E2</b>     | -0.80 | 3.85E-01 | 1.00E+00 | 1.42  | 1.48E-01 | 7.04E-01 |
| <b>TRMT11</b>     | 0.95  | 2.40E-02 | 9.18E-01 | -0.52 | 1.48E-01 | 7.04E-01 |
| <b>CTSO</b>       | 0.16  | 6.08E-01 | 1.00E+00 | 0.37  | 1.48E-01 | 7.04E-01 |
| <b>PGGHG</b>      | 0.38  | 4.20E-01 | 1.00E+00 | 1.35  | 1.48E-01 | 7.04E-01 |
| <b>SYCP2L</b>     | -0.66 | 7.70E-01 | 1.00E+00 | 2.32  | 1.48E-01 | 7.04E-01 |
| <b>NDUFC1</b>     | -0.02 | 9.28E-01 | 1.00E+00 | -0.68 | 1.48E-01 | 7.04E-01 |
| <b>KCNE4</b>      | -0.07 | 8.42E-01 | 1.00E+00 | 0.79  | 1.48E-01 | 7.04E-01 |
| <b>AC093616.1</b> | 2.12  | 4.84E-05 | 1.30E-02 | 0.82  | 1.48E-01 | 7.04E-01 |
| <b>OCIAD1</b>     | -0.04 | 7.34E-01 | 1.00E+00 | -0.25 | 1.48E-01 | 7.04E-01 |
| <b>ZNRF3-AS1</b>  | -2.15 | 5.30E-01 | 1.00E+00 | -2.10 | 1.48E-01 | 7.04E-01 |
| <b>GTF2I</b>      | -0.27 | 1.97E-01 | 1.00E+00 | -0.51 | 1.48E-01 | 7.04E-01 |
| <b>SPATA41</b>    | -0.73 | 5.81E-01 | 1.00E+00 | 2.82  | 1.48E-01 | 7.04E-01 |
| <b>TMEM220</b>    | 0.02  | 9.55E-01 | 1.00E+00 | -0.60 | 1.48E-01 | 7.04E-01 |
| <b>SP140</b>      | -0.22 | 7.48E-01 | 1.00E+00 | 1.17  | 1.48E-01 | 7.04E-01 |
| <b>LTBP1</b>      | 0.31  | 4.66E-01 | 1.00E+00 | 0.71  | 1.48E-01 | 7.04E-01 |
| <b>STK25P1</b>    | 1.52  | 3.68E-01 | 1.00E+00 | 1.99  | 1.48E-01 | 7.04E-01 |
| <b>GRSF1</b>      | 0.00  | 9.89E-01 | 1.00E+00 | -0.36 | 1.48E-01 | 7.04E-01 |
| <b>HIST2H2BE</b>  | -0.54 | 2.52E-01 | 1.00E+00 | 0.50  | 1.48E-01 | 7.04E-01 |

|                     |       |          |          |       |          |          |
|---------------------|-------|----------|----------|-------|----------|----------|
| <b>BEX4</b>         | -0.03 | 8.97E-01 | 1.00E+00 | -0.39 | 1.48E-01 | 7.04E-01 |
| <b>TMEM173</b>      | -0.17 | 6.47E-01 | 1.00E+00 | 0.63  | 1.48E-01 | 7.04E-01 |
| <b>ACP4</b>         | 0.83  | 3.54E-01 | 1.00E+00 | -1.73 | 1.48E-01 | 7.04E-01 |
| <b>AC116347.1</b>   | -0.56 | 8.73E-01 | 1.00E+00 | 1.11  | 1.48E-01 | 7.04E-01 |
| <b>SLC25A11</b>     | -0.08 | 6.52E-01 | 1.00E+00 | -0.32 | 1.48E-01 | 7.04E-01 |
| <b>PWWP2A</b>       | -0.20 | 5.01E-01 | 1.00E+00 | -0.60 | 1.48E-01 | 7.04E-01 |
| <b>NLRC5</b>        | -0.42 | 2.64E-01 | 1.00E+00 | 0.84  | 1.48E-01 | 7.04E-01 |
| <b>FOXF2</b>        | -0.13 | 7.61E-01 | 1.00E+00 | 1.18  | 1.48E-01 | 7.04E-01 |
| <b>AKNAD1</b>       | 0.00  | 1.00E+00 | 1.00E+00 | 0.96  | 1.48E-01 | 7.04E-01 |
| <b>C5orf30</b>      | -0.05 | 8.79E-01 | 1.00E+00 | -0.51 | 1.48E-01 | 7.04E-01 |
| <b>AC021086.1</b>   | 1.78  | 2.32E-01 | 1.00E+00 | -1.38 | 1.48E-01 | 7.04E-01 |
| <b>SULT1A1</b>      | 0.83  | 2.69E-01 | 1.00E+00 | 0.63  | 1.48E-01 | 7.04E-01 |
| <b>FAM3B</b>        | -0.25 | 7.15E-01 | 1.00E+00 | -0.99 | 1.48E-01 | 7.04E-01 |
| <b>PKD1</b>         | -0.22 | 4.90E-01 | 1.00E+00 | 1.04  | 1.49E-01 | 7.05E-01 |
| <b>SOX12</b>        | -0.19 | 4.90E-01 | 1.00E+00 | 1.02  | 1.49E-01 | 7.05E-01 |
| <b>G39379</b>       | 0.19  | 8.38E-01 | 1.00E+00 | -1.68 | 1.49E-01 | 7.05E-01 |
| <b>P2RY10</b>       | -0.47 | 6.02E-01 | 1.00E+00 | 1.17  | 1.49E-01 | 7.05E-01 |
| <b>GPANK1</b>       | -0.07 | 6.82E-01 | 1.00E+00 | 0.23  | 1.49E-01 | 7.05E-01 |
| <b>DSCAM</b>        | -2.86 | 1.09E-01 | 1.00E+00 | 1.99  | 1.49E-01 | 7.05E-01 |
| <b>XLOC_004362</b>  | -1.44 | 1.39E-01 | 1.00E+00 | 1.62  | 1.49E-01 | 7.05E-01 |
| <b>TMEM14A</b>      | 0.22  | 4.68E-01 | 1.00E+00 | -0.63 | 1.49E-01 | 7.05E-01 |
| <b>TMPRSS7</b>      | 1.36  | 1.21E-01 | 1.00E+00 | -1.34 | 1.49E-01 | 7.05E-01 |
| <b>RP11-435B5.5</b> | -1.83 | 3.70E-01 | 1.00E+00 | -1.01 | 1.49E-01 | 7.05E-01 |
| <b>ME1</b>          | 0.32  | 3.76E-01 | 1.00E+00 | -0.56 | 1.49E-01 | 7.05E-01 |
| <b>UMAD1</b>        | 0.10  | 7.60E-01 | 1.00E+00 | -0.45 | 1.49E-01 | 7.05E-01 |
| <b>EIF3EP1</b>      | -0.56 | 2.09E-01 | 1.00E+00 | -0.64 | 1.49E-01 | 7.05E-01 |
| <b>AP000438.1</b>   | 2.44  | 3.93E-01 | 1.00E+00 | -1.83 | 1.49E-01 | 7.05E-01 |
| <b>AK4P3</b>        | -1.35 | 4.91E-01 | 1.00E+00 | -0.82 | 1.49E-01 | 7.06E-01 |
| <b>HAGH</b>         | 0.08  | 6.76E-01 | 1.00E+00 | -0.28 | 1.49E-01 | 7.06E-01 |
| <b>FAM185A</b>      | 0.27  | 2.60E-01 | 1.00E+00 | -0.49 | 1.49E-01 | 7.06E-01 |
| <b>RPS11</b>        | -0.20 | 4.53E-01 | 1.00E+00 | 0.46  | 1.49E-01 | 7.06E-01 |
| <b>HNRNPMP1</b>     | -1.25 | 7.14E-01 | 1.00E+00 | 3.31  | 1.49E-01 | 7.06E-01 |

|                   |       |          |          |       |          |          |
|-------------------|-------|----------|----------|-------|----------|----------|
| <b>TMUB2</b>      | 0.06  | 7.51E-01 | 1.00E+00 | 0.24  | 1.49E-01 | 7.06E-01 |
| <b>FNBP4</b>      | -0.14 | 6.10E-01 | 1.00E+00 | 0.38  | 1.49E-01 | 7.06E-01 |
| <b>HNRNPA1</b>    | -0.03 | 8.48E-01 | 1.00E+00 | 0.40  | 1.49E-01 | 7.06E-01 |
| <b>B4GALT6</b>    | 0.08  | 8.50E-01 | 1.00E+00 | -0.78 | 1.50E-01 | 7.06E-01 |
| <b>SLC48A1</b>    | 0.08  | 6.73E-01 | 1.00E+00 | -0.38 | 1.50E-01 | 7.06E-01 |
| <b>AC074386.1</b> | 3.11  | 1.16E-02 | 6.66E-01 | -0.89 | 1.50E-01 | 7.06E-01 |
| <b>STX3</b>       | 0.09  | 6.95E-01 | 1.00E+00 | 0.49  | 1.50E-01 | 7.06E-01 |
| <b>TMEM255B</b>   | 0.41  | 2.30E-01 | 1.00E+00 | 0.66  | 1.50E-01 | 7.07E-01 |
| <b>AC078788.1</b> | -1.26 | 7.16E-01 | 1.00E+00 | -2.92 | 1.50E-01 | 7.07E-01 |
| <b>DHCR24</b>     | -0.05 | 9.00E-01 | 1.00E+00 | -0.45 | 1.50E-01 | 7.07E-01 |
| <b>EPHA2</b>      | -0.49 | 2.88E-01 | 1.00E+00 | 0.79  | 1.50E-01 | 7.07E-01 |
| <b>TVP23B</b>     | 0.41  | 1.22E-01 | 1.00E+00 | -0.38 | 1.50E-01 | 7.07E-01 |
| <b>SIRPG</b>      | -1.65 | 1.48E-01 | 1.00E+00 | 1.47  | 1.50E-01 | 7.08E-01 |
| <b>CCDC7</b>      | -0.07 | 9.26E-01 | 1.00E+00 | -0.62 | 1.50E-01 | 7.08E-01 |
| <b>PIBF1</b>      | -0.12 | 6.43E-01 | 1.00E+00 | -0.45 | 1.50E-01 | 7.08E-01 |
| <b>GPD1</b>       | 4.35  | 2.49E-03 | 2.54E-01 | -1.43 | 1.50E-01 | 7.08E-01 |
| <b>SPCS1</b>      | 0.00  | 9.73E-01 | 1.00E+00 | -0.44 | 1.50E-01 | 7.08E-01 |
| <b>MSMO1</b>      | 0.01  | 9.85E-01 | 1.00E+00 | -0.67 | 1.50E-01 | 7.08E-01 |
| <b>FAM83H</b>     | -0.40 | 3.30E-01 | 1.00E+00 | 1.09  | 1.50E-01 | 7.08E-01 |
| <b>IRF5</b>       | -0.48 | 2.00E-01 | 1.00E+00 | 0.66  | 1.50E-01 | 7.08E-01 |
| <b>GOLGA8R</b>    | 0.57  | 4.52E-01 | 1.00E+00 | 1.51  | 1.50E-01 | 7.08E-01 |
| <b>G12854</b>     | -2.82 | 1.84E-01 | 1.00E+00 | 2.50  | 1.50E-01 | 7.08E-01 |
| <b>NMRAL1</b>     | -0.06 | 7.80E-01 | 1.00E+00 | 0.27  | 1.50E-01 | 7.08E-01 |
| <b>TRAF7</b>      | -0.26 | 3.32E-01 | 1.00E+00 | 0.66  | 1.50E-01 | 7.08E-01 |
| <b>AC136628.3</b> | 0.48  | 5.18E-01 | 1.00E+00 | 1.64  | 1.50E-01 | 7.08E-01 |
| <b>CAMK4</b>      | -0.91 | 1.01E-01 | 1.00E+00 | 1.18  | 1.50E-01 | 7.08E-01 |
| <b>GPATCH2L</b>   | 0.16  | 4.73E-01 | 1.00E+00 | 0.25  | 1.50E-01 | 7.08E-01 |
| <b>AC124016.1</b> | -2.42 | 2.22E-01 | 1.00E+00 | -1.12 | 1.51E-01 | 7.08E-01 |
| <b>MYOF</b>       | -0.26 | 2.26E-01 | 1.00E+00 | 0.55  | 1.51E-01 | 7.08E-01 |
| <b>KBTBD8</b>     | 0.63  | 2.77E-01 | 1.00E+00 | 1.09  | 1.51E-01 | 7.08E-01 |
| <b>G5142</b>      | 1.30  | 1.70E-01 | 1.00E+00 | -0.92 | 1.51E-01 | 7.08E-01 |
| <b>PLEKHM3</b>    | 0.06  | 7.88E-01 | 1.00E+00 | 0.36  | 1.51E-01 | 7.08E-01 |



|                   |       |          |          |       |          |          |
|-------------------|-------|----------|----------|-------|----------|----------|
| <b>CX3CR1</b>     | 0.20  | 7.56E-01 | 1.00E+00 | 0.82  | 1.51E-01 | 7.09E-01 |
| <b>BAHCC1</b>     | -0.67 | 4.83E-02 | 1.00E+00 | 1.08  | 1.51E-01 | 7.09E-01 |
| <b>U3</b>         | 0.46  | 5.89E-01 | 1.00E+00 | -0.54 | 1.51E-01 | 7.09E-01 |
| <b>EPB41L3</b>    | -0.02 | 9.24E-01 | 1.00E+00 | 0.81  | 1.51E-01 | 7.09E-01 |
| <b>MRPS31P5</b>   | -0.73 | 7.91E-01 | 1.00E+00 | -1.23 | 1.51E-01 | 7.09E-01 |
| <b>Z97633.1</b>   | -0.84 | 2.43E-01 | 1.00E+00 | 1.15  | 1.51E-01 | 7.09E-01 |
| <b>CCDC171</b>    | -0.29 | 3.30E-01 | 1.00E+00 | -0.45 | 1.51E-01 | 7.09E-01 |
| <b>TCTE1</b>      | -0.10 | 8.99E-01 | 1.00E+00 | 1.72  | 1.51E-01 | 7.09E-01 |
| <b>DYNLRB2</b>    | -0.38 | 4.30E-01 | 1.00E+00 | -0.83 | 1.51E-01 | 7.09E-01 |
| <b>VPS35</b>      | 0.07  | 6.88E-01 | 1.00E+00 | -0.28 | 1.51E-01 | 7.09E-01 |
| <b>NEURL4</b>     | -0.37 | 1.22E-01 | 1.00E+00 | 1.04  | 1.51E-01 | 7.09E-01 |
| <b>GALNT2</b>     | 0.15  | 5.70E-01 | 1.00E+00 | 0.66  | 1.51E-01 | 7.09E-01 |
| <b>ASF1A</b>      | 0.05  | 8.63E-01 | 1.00E+00 | -0.66 | 1.51E-01 | 7.09E-01 |
| <b>ZNF385A</b>    | -0.41 | 2.52E-01 | 1.00E+00 | 0.48  | 1.51E-01 | 7.09E-01 |
| <b>SPDEF</b>      | -0.07 | 9.57E-01 | 1.00E+00 | -1.17 | 1.51E-01 | 7.09E-01 |
| <b>HMGB1</b>      | -0.01 | 9.80E-01 | 1.00E+00 | -0.29 | 1.51E-01 | 7.09E-01 |
| <b>NAP1L1P1</b>   | -1.33 | 4.77E-01 | 1.00E+00 | -1.54 | 1.52E-01 | 7.10E-01 |
| <b>NFIA</b>       | 0.40  | 1.95E-01 | 1.00E+00 | -0.63 | 1.52E-01 | 7.10E-01 |
| <b>ABCC1</b>      | -0.37 | 2.93E-02 | 9.91E-01 | 0.79  | 1.52E-01 | 7.10E-01 |
| <b>CYP2D7</b>     | -0.54 | 6.20E-01 | 1.00E+00 | 1.70  | 1.52E-01 | 7.10E-01 |
| <b>EPO</b>        | 0.37  | 7.25E-01 | 1.00E+00 | 1.90  | 1.52E-01 | 7.10E-01 |
| <b>TRMT1</b>      | -0.20 | 4.55E-01 | 1.00E+00 | 0.33  | 1.52E-01 | 7.11E-01 |
| <b>TRIM33</b>     | 0.18  | 5.05E-01 | 1.00E+00 | -0.40 | 1.52E-01 | 7.11E-01 |
| <b>RB1-DT</b>     | 0.66  | 4.79E-01 | 1.00E+00 | -1.47 | 1.52E-01 | 7.11E-01 |
| <b>CAVIN2</b>     | 0.95  | 1.38E-01 | 1.00E+00 | -0.84 | 1.52E-01 | 7.11E-01 |
| <b>GCLM</b>       | -0.09 | 8.08E-01 | 1.00E+00 | -0.67 | 1.52E-01 | 7.11E-01 |
| <b>TMEM140</b>    | 0.57  | 2.57E-01 | 1.00E+00 | 0.73  | 1.52E-01 | 7.11E-01 |
| <b>CRYZL1</b>     | 0.21  | 2.18E-01 | 1.00E+00 | -0.57 | 1.52E-01 | 7.11E-01 |
| <b>G2580</b>      | 1.22  | 4.71E-01 | 1.00E+00 | 2.01  | 1.52E-01 | 7.11E-01 |
| <b>PLEKHM2</b>    | -0.33 | 1.77E-01 | 1.00E+00 | 0.71  | 1.52E-01 | 7.11E-01 |
| <b>GSTM2</b>      | 0.61  | 1.63E-01 | 1.00E+00 | -0.63 | 1.52E-01 | 7.11E-01 |
| <b>AC010615.1</b> | -2.12 | 1.65E-01 | 1.00E+00 | 1.19  | 1.52E-01 | 7.11E-01 |

|                    |       |          |          |       |          |          |
|--------------------|-------|----------|----------|-------|----------|----------|
| <b>AL096869.2</b>  | -1.18 | 7.27E-01 | 1.00E+00 | 1.60  | 1.52E-01 | 7.11E-01 |
| <b>G15374</b>      | 0.29  | 7.44E-01 | 1.00E+00 | -1.01 | 1.52E-01 | 7.11E-01 |
| <b>SH2D2A</b>      | -1.58 | 1.47E-02 | 7.61E-01 | 1.42  | 1.52E-01 | 7.11E-01 |
| <b>AL359198.1</b>  | NA    | NA       | NA       | -1.90 | 1.53E-01 | 7.11E-01 |
| <b>AC090948.1</b>  | 0.38  | 8.45E-01 | 1.00E+00 | 1.63  | 1.53E-01 | 7.11E-01 |
| <b>AP006623.1</b>  | -0.38 | 6.36E-01 | 1.00E+00 | 1.51  | 1.53E-01 | 7.11E-01 |
| <b>MAML1</b>       | -0.16 | 4.92E-01 | 1.00E+00 | 0.63  | 1.53E-01 | 7.11E-01 |
| <b>G26897</b>      | -0.19 | 7.00E-01 | 1.00E+00 | -1.12 | 1.53E-01 | 7.11E-01 |
| <b>WIF1</b>        | 1.92  | 3.93E-04 | 8.21E-02 | 1.32  | 1.53E-01 | 7.11E-01 |
| <b>BRI3BP</b>      | 0.05  | 8.35E-01 | 1.00E+00 | -0.50 | 1.53E-01 | 7.11E-01 |
| <b>MGC12916</b>    | -0.58 | 2.99E-01 | 1.00E+00 | 1.89  | 1.53E-01 | 7.11E-01 |
| <b>ACAT1</b>       | 0.30  | 2.15E-01 | 1.00E+00 | -0.60 | 1.53E-01 | 7.11E-01 |
| <b>CREB3L4</b>     | 0.08  | 8.53E-01 | 1.00E+00 | -0.45 | 1.53E-01 | 7.11E-01 |
| <b>ILKAP</b>       | 0.17  | 4.74E-01 | 1.00E+00 | -0.27 | 1.53E-01 | 7.11E-01 |
| <b>CDH26</b>       | 0.87  | 2.76E-01 | 1.00E+00 | 1.04  | 1.53E-01 | 7.11E-01 |
| <b>DPP3</b>        | -0.31 | 1.25E-01 | 1.00E+00 | 0.31  | 1.53E-01 | 7.11E-01 |
| <b>VWCE</b>        | 0.90  | 1.53E-01 | 1.00E+00 | 1.70  | 1.53E-01 | 7.11E-01 |
| <b>WDR1</b>        | -0.13 | 3.33E-01 | 1.00E+00 | 0.42  | 1.53E-01 | 7.12E-01 |
| <b>MED8</b>        | 0.06  | 8.21E-01 | 1.00E+00 | 0.25  | 1.53E-01 | 7.13E-01 |
| <b>AL158823.1</b>  | -0.56 | 8.73E-01 | 1.00E+00 | -0.94 | 1.53E-01 | 7.13E-01 |
| <b>GCFC2</b>       | -0.10 | 6.94E-01 | 1.00E+00 | -0.39 | 1.53E-01 | 7.13E-01 |
| <b>ZBED6</b>       | 0.08  | 9.51E-01 | 1.00E+00 | 1.19  | 1.53E-01 | 7.13E-01 |
| <b>GPAT3</b>       | 0.50  | 3.12E-01 | 1.00E+00 | -0.57 | 1.53E-01 | 7.13E-01 |
| <b>AL035446.1</b>  | 1.00  | 6.74E-01 | 1.00E+00 | -1.40 | 1.53E-01 | 7.13E-01 |
| <b>TRIML2</b>      | -0.67 | 8.48E-01 | 1.00E+00 | 3.21  | 1.53E-01 | 7.13E-01 |
| <b>AL359183.1</b>  | 0.93  | 4.36E-01 | 1.00E+00 | 1.33  | 1.53E-01 | 7.13E-01 |
| <b>OSBPL7</b>      | 0.30  | 5.74E-01 | 1.00E+00 | 1.39  | 1.53E-01 | 7.13E-01 |
| <b>MAP1LC3A</b>    | 0.03  | 9.30E-01 | 1.00E+00 | 0.36  | 1.54E-01 | 7.13E-01 |
| <b>KLHL14</b>      | -0.32 | 7.34E-01 | 1.00E+00 | -1.83 | 1.54E-01 | 7.13E-01 |
| <b>XLOC_007617</b> | -2.19 | 2.54E-02 | 9.29E-01 | 2.80  | 1.54E-01 | 7.13E-01 |
| <b>AC009509.4</b>  | -0.63 | 7.19E-01 | 1.00E+00 | 1.91  | 1.54E-01 | 7.13E-01 |
| <b>MTERF3</b>      | 0.22  | 4.73E-01 | 1.00E+00 | -0.47 | 1.54E-01 | 7.13E-01 |

|                    |       |          |          |       |          |          |
|--------------------|-------|----------|----------|-------|----------|----------|
| <b>MOB3B</b>       | 0.23  | 2.70E-01 | 1.00E+00 | 0.32  | 1.54E-01 | 7.13E-01 |
| <b>CSMD1</b>       | 0.66  | 4.72E-01 | 1.00E+00 | -1.10 | 1.54E-01 | 7.13E-01 |
| <b>YAE1</b>        | 0.10  | 5.83E-01 | 1.00E+00 | -0.51 | 1.54E-01 | 7.13E-01 |
| <b>DUSP16</b>      | -0.02 | 9.20E-01 | 1.00E+00 | 0.61  | 1.54E-01 | 7.13E-01 |
| <b>AL603766.1</b>  | NA    | NA       | NA       | -1.17 | 1.54E-01 | 7.13E-01 |
| <b>TMEM168</b>     | 0.11  | 7.44E-01 | 1.00E+00 | -0.57 | 1.54E-01 | 7.13E-01 |
| <b>CLDND1</b>      | 0.61  | 3.55E-02 | 1.00E+00 | -0.71 | 1.54E-01 | 7.14E-01 |
| <b>ERLIN2</b>      | 0.07  | 7.30E-01 | 1.00E+00 | 0.53  | 1.54E-01 | 7.14E-01 |
| <b>XLOC_005247</b> | 0.29  | 3.99E-01 | 1.00E+00 | 0.78  | 1.54E-01 | 7.14E-01 |
| <b>COPS2</b>       | 0.05  | 8.25E-01 | 1.00E+00 | 0.25  | 1.54E-01 | 7.14E-01 |
| <b>METTL25</b>     | 0.10  | 7.56E-01 | 1.00E+00 | -0.49 | 1.54E-01 | 7.14E-01 |
| <b>RGL1</b>        | 0.18  | 5.62E-01 | 1.00E+00 | 0.67  | 1.54E-01 | 7.14E-01 |
| <b>ELF5</b>        | 0.31  | 7.04E-01 | 1.00E+00 | -0.87 | 1.54E-01 | 7.14E-01 |
| <b>LINC01915</b>   | 1.14  | 2.93E-01 | 1.00E+00 | 1.17  | 1.54E-01 | 7.14E-01 |
| <b>AC005674.1</b>  | -1.31 | 4.55E-01 | 1.00E+00 | 1.75  | 1.54E-01 | 7.14E-01 |
| <b>ZNF576</b>      | -0.09 | 7.40E-01 | 1.00E+00 | -0.33 | 1.54E-01 | 7.14E-01 |
| <b>CLCN3</b>       | 0.15  | 5.33E-01 | 1.00E+00 | 0.32  | 1.54E-01 | 7.14E-01 |
| <b>UPK2</b>        | -2.94 | 1.67E-02 | 8.12E-01 | -1.49 | 1.55E-01 | 7.14E-01 |
| <b>PABPC1</b>      | -0.17 | 5.12E-01 | 1.00E+00 | 0.46  | 1.55E-01 | 7.14E-01 |
| <b>LINC00893</b>   | 0.45  | 7.66E-01 | 1.00E+00 | 1.07  | 1.55E-01 | 7.14E-01 |
| <b>EPHA10</b>      | -1.26 | 5.09E-02 | 1.00E+00 | 1.60  | 1.55E-01 | 7.14E-01 |
| <b>MATR3</b>       | -0.04 | 8.13E-01 | 1.00E+00 | -0.22 | 1.55E-01 | 7.14E-01 |
| <b>AC008663.1</b>  | -0.93 | 7.88E-01 | 1.00E+00 | 2.27  | 1.55E-01 | 7.14E-01 |
| <b>XLOC_003077</b> | -1.16 | 6.46E-01 | 1.00E+00 | -1.64 | 1.55E-01 | 7.14E-01 |
| <b>FAM155A</b>     | -0.64 | 3.97E-01 | 1.00E+00 | 1.06  | 1.55E-01 | 7.14E-01 |
| <b>PHF11</b>       | 0.21  | 5.39E-01 | 1.00E+00 | 0.35  | 1.55E-01 | 7.14E-01 |
| <b>GARS</b>        | -0.29 | 2.06E-01 | 1.00E+00 | 0.23  | 1.55E-01 | 7.14E-01 |
| <b>SCARF2</b>      | -0.36 | 4.52E-01 | 1.00E+00 | 1.28  | 1.55E-01 | 7.14E-01 |
| <b>DNAJC1</b>      | 0.05  | 8.01E-01 | 1.00E+00 | 0.27  | 1.55E-01 | 7.15E-01 |
| <b>IQSEC1</b>      | -0.03 | 9.22E-01 | 1.00E+00 | 0.72  | 1.55E-01 | 7.15E-01 |
| <b>CCBE1</b>       | 0.69  | 5.50E-02 | 1.00E+00 | 0.68  | 1.55E-01 | 7.15E-01 |
| <b>GBE1</b>        | 0.39  | 1.65E-01 | 1.00E+00 | -0.57 | 1.55E-01 | 7.15E-01 |

|             |       |          |          |       |          |          |
|-------------|-------|----------|----------|-------|----------|----------|
| HIST1H2AE   | -2.08 | 1.48E-03 | 2.09E-01 | -1.04 | 1.55E-01 | 7.15E-01 |
| LINC00562   | -3.69 | 2.90E-02 | 9.88E-01 | 1.57  | 1.55E-01 | 7.15E-01 |
| TRAV27      | 1.08  | 7.51E-01 | 1.00E+00 | 2.26  | 1.55E-01 | 7.15E-01 |
| NUDT4B      | 1.14  | 2.67E-01 | 1.00E+00 | -1.04 | 1.55E-01 | 7.15E-01 |
| EIF3FP3     | -1.92 | 1.47E-03 | 2.09E-01 | -0.59 | 1.55E-01 | 7.15E-01 |
| AL513497.1  | -0.19 | 8.42E-01 | 1.00E+00 | 1.38  | 1.55E-01 | 7.15E-01 |
| ZNF365      | 0.09  | 8.97E-01 | 1.00E+00 | 1.06  | 1.55E-01 | 7.15E-01 |
| NR1I2       | -0.39 | 9.09E-01 | 1.00E+00 | 2.02  | 1.55E-01 | 7.15E-01 |
| HAPLN3      | -1.04 | 3.20E-03 | 2.97E-01 | 1.04  | 1.55E-01 | 7.15E-01 |
| MGAT4A      | 0.10  | 7.22E-01 | 1.00E+00 | 0.58  | 1.56E-01 | 7.16E-01 |
| CDHR2       | -2.97 | 4.03E-03 | 3.54E-01 | 1.85  | 1.56E-01 | 7.16E-01 |
| AL031846.2  | 1.63  | 2.33E-01 | 1.00E+00 | 2.21  | 1.56E-01 | 7.16E-01 |
| CLEC12A-AS1 | -3.24 | 2.22E-01 | 1.00E+00 | 2.51  | 1.56E-01 | 7.16E-01 |
| CLCN2       | -0.70 | 4.12E-02 | 1.00E+00 | -1.70 | 1.56E-01 | 7.16E-01 |
| SPAG16      | 0.05  | 8.35E-01 | 1.00E+00 | -0.62 | 1.56E-01 | 7.16E-01 |
| AC016582.2  | -0.28 | 8.84E-01 | 1.00E+00 | -0.76 | 1.56E-01 | 7.16E-01 |
| AHCYL2      | -0.07 | 7.80E-01 | 1.00E+00 | -0.83 | 1.56E-01 | 7.16E-01 |
| FDXACB1     | 0.07  | 9.13E-01 | 1.00E+00 | -0.70 | 1.56E-01 | 7.16E-01 |
| ZNF540      | 0.11  | 9.09E-01 | 1.00E+00 | -0.81 | 1.56E-01 | 7.16E-01 |
| AL591686.1  | 3.33  | 9.19E-02 | 1.00E+00 | -1.73 | 1.56E-01 | 7.16E-01 |
| DFFB        | -0.60 | 2.06E-01 | 1.00E+00 | 0.60  | 1.56E-01 | 7.16E-01 |
| KCTD3       | 0.09  | 6.30E-01 | 1.00E+00 | -0.57 | 1.56E-01 | 7.16E-01 |
| LDLRAD3     | -0.21 | 4.43E-01 | 1.00E+00 | -0.33 | 1.56E-01 | 7.16E-01 |
| AC006213.1  | -1.77 | 3.75E-01 | 1.00E+00 | -2.02 | 1.56E-01 | 7.16E-01 |
| AC105074.1  | 1.85  | 1.57E-01 | 1.00E+00 | -2.31 | 1.56E-01 | 7.16E-01 |
| TBP         | -0.03 | 9.13E-01 | 1.00E+00 | -0.42 | 1.56E-01 | 7.16E-01 |
| AC087286.2  | 1.58  | 4.68E-01 | 1.00E+00 | -0.80 | 1.56E-01 | 7.16E-01 |
| XLOC_002133 | 0.22  | 6.79E-01 | 1.00E+00 | 0.41  | 1.56E-01 | 7.16E-01 |
| CHST6       | -0.43 | 5.82E-01 | 1.00E+00 | 1.71  | 1.56E-01 | 7.16E-01 |
| AL022345.4  | 0.59  | 6.91E-01 | 1.00E+00 | -1.14 | 1.56E-01 | 7.16E-01 |
| XLOC_002197 | 2.32  | 4.97E-01 | 1.00E+00 | -1.59 | 1.56E-01 | 7.16E-01 |
| WASH8P      | -0.15 | 7.16E-01 | 1.00E+00 | 0.65  | 1.56E-01 | 7.16E-01 |

|             |       |          |          |       |          |          |
|-------------|-------|----------|----------|-------|----------|----------|
| DGCR6       | 0.82  | 9.24E-02 | 1.00E+00 | -0.60 | 1.56E-01 | 7.16E-01 |
| G20595      | -0.70 | 7.55E-01 | 1.00E+00 | 1.97  | 1.56E-01 | 7.16E-01 |
| LINC01137   | 0.28  | 2.78E-01 | 1.00E+00 | 0.51  | 1.56E-01 | 7.16E-01 |
| AL645608.7  | -1.32 | 2.01E-01 | 1.00E+00 | 1.71  | 1.56E-01 | 7.16E-01 |
| CNKSR2      | 0.36  | 4.97E-01 | 1.00E+00 | -0.82 | 1.56E-01 | 7.16E-01 |
| MSX2        | -0.20 | 6.57E-01 | 1.00E+00 | -0.92 | 1.56E-01 | 7.16E-01 |
| G35671      | 0.10  | 9.28E-01 | 1.00E+00 | -1.56 | 1.56E-01 | 7.16E-01 |
| ZBTB5       | 0.09  | 7.55E-01 | 1.00E+00 | 0.54  | 1.56E-01 | 7.16E-01 |
| AGAP1       | -0.12 | 7.64E-01 | 1.00E+00 | 0.73  | 1.56E-01 | 7.16E-01 |
| XLOC_005972 | 1.18  | 6.13E-01 | 1.00E+00 | -2.07 | 1.56E-01 | 7.16E-01 |
| AC016405.3  | -0.88 | 4.80E-01 | 1.00E+00 | -0.97 | 1.56E-01 | 7.16E-01 |
| ACOT2       | 0.52  | 3.47E-01 | 1.00E+00 | -0.59 | 1.56E-01 | 7.16E-01 |
| PDE7A       | 0.18  | 5.49E-01 | 1.00E+00 | 0.68  | 1.57E-01 | 7.16E-01 |
| E2F3        | -0.07 | 8.29E-01 | 1.00E+00 | 0.84  | 1.57E-01 | 7.16E-01 |
| PKLR        | -0.64 | 5.38E-01 | 1.00E+00 | -1.68 | 1.57E-01 | 7.16E-01 |
| GPR31       | -0.88 | 7.19E-01 | 1.00E+00 | 2.29  | 1.57E-01 | 7.16E-01 |
| FOXD3-AS1   | 0.31  | 6.55E-01 | 1.00E+00 | -0.68 | 1.57E-01 | 7.16E-01 |
| GEMIN8P4    | -0.32 | 6.27E-01 | 1.00E+00 | 0.83  | 1.57E-01 | 7.16E-01 |
| HERC6       | -0.27 | 7.12E-01 | 1.00E+00 | 0.85  | 1.57E-01 | 7.16E-01 |
| MEX3D       | -0.29 | 2.71E-01 | 1.00E+00 | 1.02  | 1.57E-01 | 7.16E-01 |
| MYHAS       | 2.97  | 1.50E-01 | 1.00E+00 | 1.73  | 1.57E-01 | 7.16E-01 |
| KIAA1191    | 0.00  | 9.98E-01 | 1.00E+00 | -0.24 | 1.57E-01 | 7.16E-01 |
| SUGT1       | 0.13  | 5.96E-01 | 1.00E+00 | -0.32 | 1.57E-01 | 7.16E-01 |
| SPOCK2      | -0.26 | 5.78E-01 | 1.00E+00 | 1.34  | 1.57E-01 | 7.16E-01 |
| PLEKHM1     | -0.06 | 7.81E-01 | 1.00E+00 | 0.76  | 1.57E-01 | 7.16E-01 |
| SLC37A1     | -0.10 | 5.67E-01 | 1.00E+00 | 0.61  | 1.57E-01 | 7.16E-01 |
| G24466      | 0.83  | 6.05E-01 | 1.00E+00 | -1.29 | 1.57E-01 | 7.16E-01 |
| ABCD2       | 2.44  | 2.44E-02 | 9.22E-01 | -1.21 | 1.57E-01 | 7.16E-01 |
| HLA-A       | -0.18 | 5.95E-01 | 1.00E+00 | 0.73  | 1.57E-01 | 7.16E-01 |
| SF3B2       | -0.25 | 1.82E-01 | 1.00E+00 | 0.34  | 1.57E-01 | 7.16E-01 |
| MED7        | 0.10  | 6.51E-01 | 1.00E+00 | -0.56 | 1.57E-01 | 7.16E-01 |
| THOC5       | 0.22  | 2.47E-01 | 1.00E+00 | 0.24  | 1.57E-01 | 7.16E-01 |

|            |       |          |          |       |          |          |
|------------|-------|----------|----------|-------|----------|----------|
| MRPS23     | 0.05  | 7.14E-01 | 1.00E+00 | 0.28  | 1.57E-01 | 7.16E-01 |
| MEIOC      | -0.03 | 9.72E-01 | 1.00E+00 | -1.37 | 1.57E-01 | 7.16E-01 |
| TMEM18     | 0.26  | 2.61E-01 | 1.00E+00 | -0.31 | 1.57E-01 | 7.16E-01 |
| ELL2P1     | 1.24  | 6.28E-01 | 1.00E+00 | 0.92  | 1.57E-01 | 7.16E-01 |
| STKLD1     | -0.17 | 6.67E-01 | 1.00E+00 | -0.79 | 1.57E-01 | 7.16E-01 |
| PRSS36     | -0.04 | 9.34E-01 | 1.00E+00 | 0.53  | 1.57E-01 | 7.16E-01 |
| NOTCH2     | 0.25  | 2.90E-01 | 1.00E+00 | 0.55  | 1.57E-01 | 7.16E-01 |
| PROC       | -0.49 | 6.84E-01 | 1.00E+00 | 1.43  | 1.57E-01 | 7.16E-01 |
| AC032011.1 | -4.45 | 1.99E-01 | 1.00E+00 | -2.42 | 1.57E-01 | 7.16E-01 |
| NDST2      | -1.02 | 6.68E-01 | 1.00E+00 | -1.21 | 1.57E-01 | 7.16E-01 |
| ZNF429     | 0.24  | 4.65E-01 | 1.00E+00 | -0.57 | 1.57E-01 | 7.16E-01 |
| UPF3AP1    | -0.03 | 9.87E-01 | 1.00E+00 | -0.67 | 1.57E-01 | 7.16E-01 |
| AC023886.2 | 1.48  | 6.66E-01 | 1.00E+00 | -0.92 | 1.57E-01 | 7.16E-01 |
| RIPK2      | -0.01 | 9.66E-01 | 1.00E+00 | 0.33  | 1.57E-01 | 7.16E-01 |
| NCR3       | -0.61 | 3.77E-01 | 1.00E+00 | 1.28  | 1.58E-01 | 7.16E-01 |
| ZC3H12D    | -0.31 | 6.14E-01 | 1.00E+00 | 1.51  | 1.58E-01 | 7.16E-01 |
| AC079921.2 | -2.57 | 9.04E-02 | 1.00E+00 | 1.63  | 1.58E-01 | 7.16E-01 |
| MIR200CHG  | 0.21  | 4.32E-01 | 1.00E+00 | -0.95 | 1.58E-01 | 7.16E-01 |
| OPRL1      | 0.39  | 3.79E-01 | 1.00E+00 | 1.14  | 1.58E-01 | 7.16E-01 |
| WDTC1      | -0.14 | 3.17E-01 | 1.00E+00 | 0.76  | 1.58E-01 | 7.16E-01 |
| MT-TM      | NA    | NA       | NA       | -1.05 | 1.58E-01 | 7.16E-01 |
| G39546     | 0.50  | 8.74E-01 | 1.00E+00 | -1.79 | 1.58E-01 | 7.16E-01 |
| HBEGF      | -1.30 | 4.81E-02 | 1.00E+00 | 0.77  | 1.58E-01 | 7.16E-01 |
| LRRC59     | -0.38 | 1.46E-02 | 7.60E-01 | 0.38  | 1.58E-01 | 7.16E-01 |
| AL031714.1 | 0.65  | 3.52E-01 | 1.00E+00 | 1.59  | 1.58E-01 | 7.17E-01 |
| INTS10     | 0.08  | 6.40E-01 | 1.00E+00 | -0.22 | 1.58E-01 | 7.17E-01 |
| PRIM1      | -0.09 | 7.29E-01 | 1.00E+00 | -0.40 | 1.58E-01 | 7.17E-01 |
| EEF1GP2    | -0.48 | 7.13E-01 | 1.00E+00 | -1.96 | 1.58E-01 | 7.17E-01 |
| AP001486.2 | 0.14  | 6.69E-01 | 1.00E+00 | -0.63 | 1.58E-01 | 7.17E-01 |
| AC138356.1 | 2.04  | 4.68E-02 | 1.00E+00 | -0.96 | 1.58E-01 | 7.17E-01 |
| SAA1       | 0.67  | 4.26E-01 | 1.00E+00 | -1.32 | 1.58E-01 | 7.17E-01 |
| SLC25A3    | 0.05  | 8.58E-01 | 1.00E+00 | -0.17 | 1.58E-01 | 7.17E-01 |

|            |       |          |          |       |          |          |
|------------|-------|----------|----------|-------|----------|----------|
| ITM2C      | 0.11  | 7.54E-01 | 1.00E+00 | 0.45  | 1.58E-01 | 7.17E-01 |
| ZNF181     | 0.42  | 1.44E-01 | 1.00E+00 | -0.52 | 1.58E-01 | 7.17E-01 |
| DHFRP1     | -1.17 | 3.49E-01 | 1.00E+00 | -1.04 | 1.58E-01 | 7.17E-01 |
| SYNE3      | 0.86  | 7.96E-02 | 1.00E+00 | 0.74  | 1.58E-01 | 7.17E-01 |
| RP9        | -0.03 | 9.20E-01 | 1.00E+00 | -0.38 | 1.58E-01 | 7.17E-01 |
| PARD6G     | -0.30 | 4.39E-01 | 1.00E+00 | -0.79 | 1.58E-01 | 7.17E-01 |
| MAP3K7     | 0.21  | 3.65E-01 | 1.00E+00 | -0.33 | 1.58E-01 | 7.17E-01 |
| AC079949.2 | 0.37  | 7.00E-01 | 1.00E+00 | 1.43  | 1.58E-01 | 7.17E-01 |
| CBWD7      | -1.11 | 5.54E-01 | 1.00E+00 | -0.80 | 1.58E-01 | 7.17E-01 |
| MIR99AHG   | 0.32  | 2.89E-01 | 1.00E+00 | -0.54 | 1.58E-01 | 7.17E-01 |
| AC011899.2 | -1.85 | 4.03E-01 | 1.00E+00 | 2.03  | 1.58E-01 | 7.17E-01 |
| SPRR2E     | -0.66 | 3.45E-01 | 1.00E+00 | 1.09  | 1.59E-01 | 7.17E-01 |
| EIF4ENIF1  | 0.03  | 8.59E-01 | 1.00E+00 | -0.41 | 1.59E-01 | 7.17E-01 |
| B3GAT3     | -0.18 | 3.25E-01 | 1.00E+00 | 0.31  | 1.59E-01 | 7.17E-01 |
| SEC61G     | 0.16  | 4.24E-01 | 1.00E+00 | -0.42 | 1.59E-01 | 7.17E-01 |
| RTL5       | 0.03  | 9.47E-01 | 1.00E+00 | 1.07  | 1.59E-01 | 7.17E-01 |
| SLC25A23   | -0.23 | 3.77E-01 | 1.00E+00 | -0.71 | 1.59E-01 | 7.17E-01 |
| FAM120A    | -0.13 | 3.30E-01 | 1.00E+00 | 0.56  | 1.59E-01 | 7.17E-01 |
| SLC45A4    | -0.36 | 2.96E-01 | 1.00E+00 | 0.75  | 1.59E-01 | 7.17E-01 |
| ALOX5AP    | -0.32 | 5.03E-01 | 1.00E+00 | 0.47  | 1.59E-01 | 7.17E-01 |
| FTH1P12    | 0.66  | 8.49E-01 | 1.00E+00 | -0.95 | 1.59E-01 | 7.17E-01 |
| MUC20-OT1  | 0.34  | 6.28E-01 | 1.00E+00 | -0.58 | 1.59E-01 | 7.17E-01 |
| RAB33B     | 0.19  | 4.50E-01 | 1.00E+00 | -0.47 | 1.59E-01 | 7.17E-01 |
| G10181     | -0.84 | 4.89E-02 | 1.00E+00 | -0.93 | 1.59E-01 | 7.17E-01 |
| TRDV1      | 1.86  | 5.84E-01 | 1.00E+00 | 1.62  | 1.59E-01 | 7.17E-01 |
| N4BP3      | 0.12  | 7.47E-01 | 1.00E+00 | -0.57 | 1.59E-01 | 7.17E-01 |
| BORCS5     | -0.28 | 3.04E-01 | 1.00E+00 | 0.29  | 1.59E-01 | 7.17E-01 |
| ZNHIT2     | 0.04  | 8.91E-01 | 1.00E+00 | 0.35  | 1.59E-01 | 7.17E-01 |
| TRAV24     | -0.29 | 9.21E-01 | 1.00E+00 | 2.68  | 1.59E-01 | 7.17E-01 |
| SLC25A43   | 0.00  | 9.90E-01 | 1.00E+00 | -0.36 | 1.59E-01 | 7.17E-01 |
| GTF2F1     | -0.22 | 3.06E-01 | 1.00E+00 | 0.51  | 1.59E-01 | 7.17E-01 |
| LARP1B     | 0.00  | 9.87E-01 | 1.00E+00 | -0.36 | 1.59E-01 | 7.17E-01 |

|            |       |          |          |       |          |          |
|------------|-------|----------|----------|-------|----------|----------|
| ZNF823     | 0.08  | 7.54E-01 | 1.00E+00 | -0.40 | 1.59E-01 | 7.17E-01 |
| THAP1      | 0.23  | 4.92E-01 | 1.00E+00 | -0.43 | 1.59E-01 | 7.17E-01 |
| DELE1      | -0.06 | 8.17E-01 | 1.00E+00 | 0.37  | 1.59E-01 | 7.17E-01 |
| SLAMF9     | -1.43 | 3.79E-01 | 1.00E+00 | 1.96  | 1.59E-01 | 7.17E-01 |
| CDV3       | 0.08  | 5.96E-01 | 1.00E+00 | 0.38  | 1.59E-01 | 7.17E-01 |
| R3HCC1L    | -0.03 | 9.34E-01 | 1.00E+00 | 0.38  | 1.59E-01 | 7.17E-01 |
| NME9       | 0.44  | 6.71E-01 | 1.00E+00 | -1.66 | 1.59E-01 | 7.17E-01 |
| POGZ       | -0.14 | 5.52E-01 | 1.00E+00 | 0.42  | 1.59E-01 | 7.17E-01 |
| AL161626.1 | 0.23  | 5.19E-01 | 1.00E+00 | -1.42 | 1.60E-01 | 7.17E-01 |
| AL136418.1 | -1.18 | 3.71E-01 | 1.00E+00 | -0.93 | 1.60E-01 | 7.17E-01 |
| MR1        | 0.01  | 9.60E-01 | 1.00E+00 | 0.32  | 1.60E-01 | 7.17E-01 |
| AC131009.2 | -1.25 | 7.16E-01 | 1.00E+00 | -2.57 | 1.60E-01 | 7.17E-01 |
| DYNC1H1    | -0.19 | 4.13E-01 | 1.00E+00 | 0.47  | 1.60E-01 | 7.17E-01 |
| BEST1      | 0.55  | 2.61E-01 | 1.00E+00 | 0.74  | 1.60E-01 | 7.17E-01 |
| NEU2       | 0.66  | 5.70E-01 | 1.00E+00 | 1.07  | 1.60E-01 | 7.17E-01 |
| ZBTB8OSP2  | 2.17  | 5.25E-01 | 1.00E+00 | 2.27  | 1.60E-01 | 7.17E-01 |
| AD001527.1 | 0.87  | 5.77E-01 | 1.00E+00 | 1.74  | 1.60E-01 | 7.17E-01 |
| TRBV6-6    | -1.70 | 5.75E-01 | 1.00E+00 | 2.18  | 1.60E-01 | 7.17E-01 |
| LRRC8C     | -0.17 | 5.29E-01 | 1.00E+00 | -0.40 | 1.60E-01 | 7.17E-01 |
| ZBTB32     | 1.44  | 2.13E-01 | 1.00E+00 | 2.40  | 1.60E-01 | 7.17E-01 |
| C4BPA      | -1.24 | 7.19E-01 | 1.00E+00 | 2.54  | 1.60E-01 | 7.17E-01 |
| AC080162.1 | 1.04  | 5.12E-01 | 1.00E+00 | 1.01  | 1.60E-01 | 7.17E-01 |
| RGS18      | 0.96  | 2.90E-01 | 1.00E+00 | 1.15  | 1.60E-01 | 7.17E-01 |
| LARS2      | -0.04 | 8.36E-01 | 1.00E+00 | 0.50  | 1.60E-01 | 7.17E-01 |
| OVGP1      | -0.09 | 9.00E-01 | 1.00E+00 | 1.14  | 1.60E-01 | 7.17E-01 |
| ACTR6      | 0.18  | 5.12E-01 | 1.00E+00 | -0.48 | 1.60E-01 | 7.17E-01 |
| RNU1-1     | -0.65 | 8.51E-01 | 1.00E+00 | -1.25 | 1.60E-01 | 7.17E-01 |
| AK6        | 0.27  | 3.22E-01 | 1.00E+00 | -0.64 | 1.60E-01 | 7.17E-01 |
| RNF44      | -0.23 | 4.07E-01 | 1.00E+00 | 0.83  | 1.60E-01 | 7.17E-01 |
| ZNF114     | 0.25  | 7.35E-01 | 1.00E+00 | -0.97 | 1.60E-01 | 7.17E-01 |
| ZDHHC12    | -0.05 | 8.01E-01 | 1.00E+00 | 0.41  | 1.60E-01 | 7.17E-01 |
| AC105399.1 | NA    | NA       | NA       | -1.16 | 1.60E-01 | 7.17E-01 |



|                   |       |          |          |       |          |          |
|-------------------|-------|----------|----------|-------|----------|----------|
| <b>AL138999.1</b> | 2.55  | 4.53E-01 | 1.00E+00 | 2.15  | 1.60E-01 | 7.17E-01 |
| <b>GRIN2A</b>     | -0.70 | 1.29E-01 | 1.00E+00 | -0.79 | 1.60E-01 | 7.17E-01 |
| <b>ARSB</b>       | 0.03  | 9.35E-01 | 1.00E+00 | 0.68  | 1.60E-01 | 7.17E-01 |
| <b>AC078846.1</b> | 0.18  | 6.11E-01 | 1.00E+00 | -0.59 | 1.60E-01 | 7.17E-01 |
| <b>LINC00664</b>  | -0.49 | 8.78E-01 | 1.00E+00 | -2.54 | 1.60E-01 | 7.17E-01 |
| <b>GPRIN3</b>     | 0.36  | 4.12E-01 | 1.00E+00 | 1.01  | 1.60E-01 | 7.18E-01 |
| <b>AKR1C3</b>     | 0.89  | 1.14E-01 | 1.00E+00 | -0.79 | 1.60E-01 | 7.18E-01 |
| <b>AC025580.2</b> | -1.77 | 5.01E-01 | 1.00E+00 | 1.34  | 1.61E-01 | 7.18E-01 |
| <b>ZAN</b>        | -3.46 | 1.74E-01 | 1.00E+00 | 2.05  | 1.61E-01 | 7.18E-01 |
| <b>MICALL2</b>    | -0.57 | 1.85E-01 | 1.00E+00 | 0.89  | 1.61E-01 | 7.18E-01 |
| <b>CYP11A1</b>    | 0.09  | 9.37E-01 | 1.00E+00 | 1.42  | 1.61E-01 | 7.18E-01 |
| <b>PPA2</b>       | 0.04  | 8.35E-01 | 1.00E+00 | -0.46 | 1.61E-01 | 7.18E-01 |
| <b>HM13</b>       | -0.18 | 4.54E-01 | 1.00E+00 | 0.32  | 1.61E-01 | 7.18E-01 |
| <b>AC002074.1</b> | 1.76  | 8.30E-02 | 1.00E+00 | 0.94  | 1.61E-01 | 7.18E-01 |
| <b>AC124045.1</b> | 0.43  | 4.93E-01 | 1.00E+00 | 0.83  | 1.61E-01 | 7.18E-01 |
| <b>SMARCD2</b>    | 0.20  | 4.35E-01 | 1.00E+00 | -0.56 | 1.61E-01 | 7.18E-01 |
| <b>AC002480.2</b> | 2.62  | 3.48E-01 | 1.00E+00 | 2.32  | 1.61E-01 | 7.18E-01 |
| <b>KIAA1586</b>   | 0.04  | 9.03E-01 | 1.00E+00 | -0.52 | 1.61E-01 | 7.18E-01 |
| <b>LTBR</b>       | -0.12 | 6.85E-01 | 1.00E+00 | 0.50  | 1.61E-01 | 7.18E-01 |
| <b>PHF1</b>       | 0.03  | 9.25E-01 | 1.00E+00 | 0.70  | 1.61E-01 | 7.18E-01 |
| <b>MEAF6</b>      | 0.10  | 5.69E-01 | 1.00E+00 | -0.37 | 1.61E-01 | 7.18E-01 |
| <b>IL36B</b>      | 0.54  | 5.15E-01 | 1.00E+00 | 1.01  | 1.61E-01 | 7.18E-01 |
| <b>OLFML1</b>     | 0.56  | 2.80E-01 | 1.00E+00 | 0.60  | 1.61E-01 | 7.18E-01 |
| <b>CD46</b>       | 0.52  | 1.50E-01 | 1.00E+00 | -0.46 | 1.61E-01 | 7.18E-01 |
| <b>AL589935.1</b> | -0.13 | 9.43E-01 | 1.00E+00 | -1.07 | 1.61E-01 | 7.18E-01 |
| <b>C1orf229</b>   | 0.83  | 3.70E-01 | 1.00E+00 | -1.32 | 1.61E-01 | 7.18E-01 |
| <b>BRCC3</b>      | -0.03 | 8.70E-01 | 1.00E+00 | -0.33 | 1.61E-01 | 7.18E-01 |
| <b>GAR1</b>       | -0.14 | 5.71E-01 | 1.00E+00 | 0.31  | 1.61E-01 | 7.18E-01 |
| <b>MIR4664</b>    | -0.97 | 1.85E-01 | 1.00E+00 | 2.57  | 1.61E-01 | 7.18E-01 |
| <b>RMND1</b>      | 0.20  | 4.98E-01 | 1.00E+00 | -0.38 | 1.62E-01 | 7.20E-01 |
| <b>RASL11A</b>    | 0.28  | 4.47E-01 | 1.00E+00 | 1.08  | 1.62E-01 | 7.20E-01 |
| <b>RPS15AP30</b>  | 0.63  | 8.54E-01 | 1.00E+00 | -1.37 | 1.62E-01 | 7.20E-01 |

|                    |       |          |          |       |          |          |
|--------------------|-------|----------|----------|-------|----------|----------|
| <b>TMEM191C</b>    | 0.24  | 6.17E-01 | 1.00E+00 | 0.65  | 1.62E-01 | 7.20E-01 |
| <b>SPATA17</b>     | 0.12  | 8.29E-01 | 1.00E+00 | 0.64  | 1.62E-01 | 7.20E-01 |
| <b>PRKG1</b>       | -0.02 | 9.65E-01 | 1.00E+00 | 0.63  | 1.62E-01 | 7.20E-01 |
| <b>GNG4</b>        | -2.93 | 5.11E-03 | 4.18E-01 | 1.42  | 1.62E-01 | 7.20E-01 |
| <b>Z86062.1</b>    | 0.73  | 8.33E-01 | 1.00E+00 | 1.26  | 1.62E-01 | 7.20E-01 |
| <b>TMIE</b>        | -0.75 | 4.20E-02 | 1.00E+00 | -1.10 | 1.62E-01 | 7.20E-01 |
| <b>HSD17B12</b>    | 0.10  | 6.05E-01 | 1.00E+00 | -0.48 | 1.62E-01 | 7.20E-01 |
| <b>XLOC_002066</b> | 0.32  | 4.89E-01 | 1.00E+00 | 1.10  | 1.62E-01 | 7.20E-01 |
| <b>HYDIN</b>       | -0.19 | 8.68E-01 | 1.00E+00 | 1.06  | 1.62E-01 | 7.20E-01 |
| <b>LGALS9B</b>     | -3.44 | 4.82E-02 | 1.00E+00 | 1.63  | 1.62E-01 | 7.20E-01 |
| <b>LIPK</b>        | 0.15  | 8.19E-01 | 1.00E+00 | -1.05 | 1.62E-01 | 7.20E-01 |
| <b>LINC00471</b>   | 0.12  | 8.81E-01 | 1.00E+00 | -0.82 | 1.62E-01 | 7.20E-01 |
| <b>GLG1</b>        | 0.15  | 5.81E-01 | 1.00E+00 | 0.31  | 1.62E-01 | 7.20E-01 |
| <b>AP001922.5</b>  | -2.91 | 7.91E-02 | 1.00E+00 | 1.56  | 1.62E-01 | 7.20E-01 |
| <b>RBPMS-AS1</b>   | 0.69  | 4.37E-01 | 1.00E+00 | -1.22 | 1.62E-01 | 7.20E-01 |
| <b>AIMP1</b>       | -0.02 | 8.96E-01 | 1.00E+00 | -0.23 | 1.62E-01 | 7.20E-01 |
| <b>LINC01621</b>   | 0.60  | 7.64E-01 | 1.00E+00 | 1.26  | 1.62E-01 | 7.20E-01 |
| <b>NLRP2</b>       | 0.29  | 6.51E-01 | 1.00E+00 | 1.13  | 1.62E-01 | 7.20E-01 |
| <b>AC018638.2</b>  | -0.78 | 1.23E-01 | 1.00E+00 | 1.86  | 1.62E-01 | 7.20E-01 |
| <b>CEACAM7</b>     | 0.50  | 4.41E-01 | 1.00E+00 | -1.09 | 1.62E-01 | 7.20E-01 |
| <b>COX15</b>       | 0.32  | 3.84E-01 | 1.00E+00 | -0.35 | 1.62E-01 | 7.20E-01 |
| <b>STARD9</b>      | 0.48  | 4.07E-01 | 1.00E+00 | 0.95  | 1.62E-01 | 7.20E-01 |
| <b>RWDD4</b>       | -0.14 | 5.26E-01 | 1.00E+00 | -0.26 | 1.62E-01 | 7.20E-01 |
| <b>SLC33A1</b>     | 0.03  | 9.36E-01 | 1.00E+00 | -0.33 | 1.63E-01 | 7.20E-01 |
| <b>RAB6C</b>       | -0.21 | 9.08E-01 | 1.00E+00 | -0.87 | 1.63E-01 | 7.20E-01 |
| <b>NEU4</b>        | -1.37 | 5.59E-01 | 1.00E+00 | 1.86  | 1.63E-01 | 7.20E-01 |
| <b>PPP1R12C</b>    | 0.07  | 8.35E-01 | 1.00E+00 | 1.13  | 1.63E-01 | 7.20E-01 |
| <b>RANBP3L</b>     | 0.69  | 5.02E-01 | 1.00E+00 | -1.33 | 1.63E-01 | 7.20E-01 |
| <b>TTC28</b>       | -0.09 | 8.10E-01 | 1.00E+00 | 0.63  | 1.63E-01 | 7.20E-01 |
| <b>LTA</b>         | -0.62 | 5.97E-01 | 1.00E+00 | 1.45  | 1.63E-01 | 7.20E-01 |
| <b>IGKV1-5</b>     | 2.52  | 4.23E-01 | 1.00E+00 | 4.38  | 1.63E-01 | 7.20E-01 |
| <b>SMIM27</b>      | 0.74  | 2.39E-01 | 1.00E+00 | -0.77 | 1.63E-01 | 7.20E-01 |

|                   |       |          |          |       |          |          |
|-------------------|-------|----------|----------|-------|----------|----------|
| <b>DHX57</b>      | 0.10  | 6.31E-01 | 1.00E+00 | 0.34  | 1.63E-01 | 7.20E-01 |
| <b>MEGF9</b>      | 0.08  | 7.94E-01 | 1.00E+00 | -0.38 | 1.63E-01 | 7.20E-01 |
| <b>ANKRD7</b>     | 0.96  | 5.59E-01 | 1.00E+00 | -1.66 | 1.63E-01 | 7.20E-01 |
| <b>G22284</b>     | -2.12 | 2.69E-01 | 1.00E+00 | -1.51 | 1.63E-01 | 7.20E-01 |
| <b>C1GALT1C1</b>  | 0.02  | 9.33E-01 | 1.00E+00 | -0.37 | 1.63E-01 | 7.20E-01 |
| <b>PGM2</b>       | 0.08  | 8.22E-01 | 1.00E+00 | 0.36  | 1.63E-01 | 7.20E-01 |
| <b>SNHG20</b>     | 0.25  | 6.35E-01 | 1.00E+00 | -0.60 | 1.63E-01 | 7.20E-01 |
| <b>MRPL35</b>     | 0.08  | 7.30E-01 | 1.00E+00 | -0.30 | 1.63E-01 | 7.20E-01 |
| <b>C15orf40</b>   | 0.11  | 5.74E-01 | 1.00E+00 | -0.44 | 1.63E-01 | 7.21E-01 |
| <b>AC053527.1</b> | 0.17  | 7.98E-01 | 1.00E+00 | -0.73 | 1.63E-01 | 7.21E-01 |
| <b>AC016773.1</b> | -0.82 | 7.16E-01 | 1.00E+00 | 1.51  | 1.63E-01 | 7.21E-01 |
| <b>SLC6A7</b>     | -2.49 | 2.07E-01 | 1.00E+00 | 2.11  | 1.63E-01 | 7.21E-01 |
| <b>MILR1</b>      | 0.10  | 8.86E-01 | 1.00E+00 | 0.86  | 1.63E-01 | 7.21E-01 |
| <b>GJC3</b>       | -0.01 | 9.89E-01 | 1.00E+00 | -0.80 | 1.63E-01 | 7.21E-01 |
| <b>AC118138.2</b> | 0.42  | 6.68E-01 | 1.00E+00 | -1.07 | 1.63E-01 | 7.21E-01 |
| <b>AC092384.1</b> | -1.07 | 3.39E-01 | 1.00E+00 | -1.19 | 1.63E-01 | 7.21E-01 |
| <b>FAM87B</b>     | -0.49 | 4.84E-01 | 1.00E+00 | 1.13  | 1.63E-01 | 7.21E-01 |
| <b>TMEM156</b>    | 1.10  | 4.06E-01 | 1.00E+00 | 1.14  | 1.63E-01 | 7.21E-01 |
| <b>VIPR1</b>      | -0.29 | 2.49E-01 | 1.00E+00 | -0.75 | 1.63E-01 | 7.21E-01 |
| <b>LINC02198</b>  | -0.44 | 8.67E-01 | 1.00E+00 | 1.66  | 1.63E-01 | 7.21E-01 |
| <b>ARL16</b>      | -0.08 | 6.62E-01 | 1.00E+00 | -0.43 | 1.63E-01 | 7.21E-01 |
| <b>AL359715.1</b> | 0.87  | 6.56E-01 | 1.00E+00 | 1.44  | 1.63E-01 | 7.21E-01 |
| <b>AIFM3</b>      | -2.31 | 3.01E-02 | 9.97E-01 | 0.76  | 1.63E-01 | 7.21E-01 |
| <b>GPR173</b>     | 0.45  | 2.21E-01 | 1.00E+00 | 1.57  | 1.63E-01 | 7.21E-01 |
| <b>AC016629.2</b> | -2.08 | 3.32E-01 | 1.00E+00 | 1.37  | 1.64E-01 | 7.21E-01 |
| <b>CFAP300</b>    | -0.07 | 8.71E-01 | 1.00E+00 | -0.56 | 1.64E-01 | 7.21E-01 |
| <b>AL844908.2</b> | 0.21  | 8.38E-01 | 1.00E+00 | 1.35  | 1.64E-01 | 7.21E-01 |
| <b>SNRPB</b>      | -0.15 | 5.38E-01 | 1.00E+00 | 0.23  | 1.64E-01 | 7.21E-01 |
| <b>CASZ1</b>      | -0.38 | 3.11E-01 | 1.00E+00 | -0.76 | 1.64E-01 | 7.21E-01 |
| <b>AC002310.1</b> | -0.42 | 4.87E-01 | 1.00E+00 | -0.89 | 1.64E-01 | 7.21E-01 |
| <b>TFAP2C</b>     | -0.18 | 5.72E-01 | 1.00E+00 | -0.62 | 1.64E-01 | 7.21E-01 |
| <b>RASSF4</b>     | 0.34  | 4.57E-01 | 1.00E+00 | 0.88  | 1.64E-01 | 7.21E-01 |

|                    |       |          |          |       |          |          |
|--------------------|-------|----------|----------|-------|----------|----------|
| <b>MPRIP-AS1</b>   | 0.26  | 9.00E-01 | 1.00E+00 | 1.10  | 1.64E-01 | 7.21E-01 |
| <b>AC092542.1</b>  | 1.51  | 2.54E-02 | 9.29E-01 | -1.20 | 1.64E-01 | 7.21E-01 |
| <b>ERRFI1</b>      | 0.00  | 9.96E-01 | 1.00E+00 | 0.54  | 1.64E-01 | 7.21E-01 |
| <b>AC131571.2</b>  | 0.63  | 8.54E-01 | 1.00E+00 | -2.31 | 1.64E-01 | 7.21E-01 |
| <b>PARP15</b>      | -0.27 | 7.96E-01 | 1.00E+00 | 1.85  | 1.64E-01 | 7.21E-01 |
| <b>LAMTOR5</b>     | 0.10  | 6.04E-01 | 1.00E+00 | -0.66 | 1.64E-01 | 7.21E-01 |
| <b>CRISP2</b>      | 0.42  | 7.10E-01 | 1.00E+00 | -1.52 | 1.64E-01 | 7.21E-01 |
| <b>PSMF1</b>       | -0.09 | 5.82E-01 | 1.00E+00 | 0.15  | 1.64E-01 | 7.21E-01 |
| <b>NFE2L2</b>      | -0.05 | 8.80E-01 | 1.00E+00 | -0.43 | 1.64E-01 | 7.21E-01 |
| <b>AC092368.3</b>  | -0.26 | 4.17E-01 | 1.00E+00 | 1.41  | 1.64E-01 | 7.21E-01 |
| <b>IGHV3-13</b>    | 1.22  | 7.19E-01 | 1.00E+00 | 3.50  | 1.64E-01 | 7.21E-01 |
| <b>ZNF268</b>      | 0.14  | 5.85E-01 | 1.00E+00 | -0.26 | 1.64E-01 | 7.21E-01 |
| <b>EEF1GP1</b>     | -0.06 | 9.86E-01 | 1.00E+00 | -1.38 | 1.64E-01 | 7.21E-01 |
| <b>NDUFA4L2</b>    | -0.25 | 2.73E-01 | 1.00E+00 | 0.53  | 1.64E-01 | 7.21E-01 |
| <b>RPRD1B</b>      | 0.03  | 8.54E-01 | 1.00E+00 | 0.35  | 1.64E-01 | 7.21E-01 |
| <b>DCUN1D1</b>     | 0.08  | 7.85E-01 | 1.00E+00 | -0.38 | 1.64E-01 | 7.21E-01 |
| <b>CAPN15</b>      | -0.69 | 1.18E-01 | 1.00E+00 | 0.91  | 1.64E-01 | 7.21E-01 |
| <b>ARMCX2</b>      | 0.19  | 7.13E-01 | 1.00E+00 | 0.75  | 1.64E-01 | 7.21E-01 |
| <b>MCF2L-AS1</b>   | 0.19  | 7.65E-01 | 1.00E+00 | -0.76 | 1.64E-01 | 7.21E-01 |
| <b>FAM168A</b>     | -0.03 | 9.27E-01 | 1.00E+00 | 0.87  | 1.65E-01 | 7.21E-01 |
| <b>HOXB2</b>       | -0.20 | 7.10E-01 | 1.00E+00 | -0.74 | 1.65E-01 | 7.21E-01 |
| <b>DPP4</b>        | 0.38  | 5.05E-01 | 1.00E+00 | 0.86  | 1.65E-01 | 7.21E-01 |
| <b>AC007319.1</b>  | 0.98  | 1.93E-01 | 1.00E+00 | -0.88 | 1.65E-01 | 7.21E-01 |
| <b>PART1</b>       | 0.15  | 7.67E-01 | 1.00E+00 | -0.71 | 1.65E-01 | 7.21E-01 |
| <b>AL356966.1</b>  | -0.64 | 5.97E-01 | 1.00E+00 | 1.20  | 1.65E-01 | 7.21E-01 |
| <b>AL589986.2</b>  | -0.56 | 8.73E-01 | 1.00E+00 | -1.90 | 1.65E-01 | 7.21E-01 |
| <b>KIF6</b>        | 0.23  | 6.58E-01 | 1.00E+00 | 1.10  | 1.65E-01 | 7.21E-01 |
| <b>AC098824.1</b>  | 1.08  | 4.60E-01 | 1.00E+00 | 1.16  | 1.65E-01 | 7.21E-01 |
| <b>AC004160.1</b>  | 5.02  | 3.11E-03 | 2.91E-01 | -1.46 | 1.65E-01 | 7.21E-01 |
| <b>G28010</b>      | -0.29 | 7.59E-01 | 1.00E+00 | 1.76  | 1.65E-01 | 7.21E-01 |
| <b>CBWD5</b>       | -0.24 | 5.52E-01 | 1.00E+00 | -0.55 | 1.65E-01 | 7.21E-01 |
| <b>XLOC_007635</b> | 0.20  | 9.53E-01 | 1.00E+00 | -1.77 | 1.65E-01 | 7.21E-01 |

|                     |       |          |          |       |          |          |
|---------------------|-------|----------|----------|-------|----------|----------|
| <b>RNF103-CHMP3</b> | 0.31  | 8.10E-01 | 1.00E+00 | 1.21  | 1.65E-01 | 7.21E-01 |
| <b>ARHGAP22</b>     | -0.63 | 4.78E-02 | 1.00E+00 | 0.80  | 1.65E-01 | 7.21E-01 |
| <b>BRIX1</b>        | -0.07 | 7.73E-01 | 1.00E+00 | -0.60 | 1.65E-01 | 7.22E-01 |
| <b>SCFD1</b>        | 0.05  | 7.77E-01 | 1.00E+00 | -0.38 | 1.65E-01 | 7.22E-01 |
| <b>ADGRL2</b>       | 0.18  | 4.58E-01 | 1.00E+00 | 0.55  | 1.65E-01 | 7.22E-01 |
| <b>CHRD</b>         | 0.49  | 2.69E-01 | 1.00E+00 | 1.27  | 1.65E-01 | 7.22E-01 |
| <b>MRPL10</b>       | 0.03  | 8.78E-01 | 1.00E+00 | 0.30  | 1.65E-01 | 7.22E-01 |
| <b>G35511</b>       | 0.34  | 7.56E-01 | 1.00E+00 | -1.14 | 1.65E-01 | 7.22E-01 |
| <b>FOXE3</b>        | 0.42  | 8.36E-01 | 1.00E+00 | -1.95 | 1.65E-01 | 7.22E-01 |
| <b>GOLPH3</b>       | 0.07  | 6.35E-01 | 1.00E+00 | -0.61 | 1.65E-01 | 7.23E-01 |
| <b>G23010</b>       | -2.92 | 7.82E-02 | 1.00E+00 | 1.41  | 1.65E-01 | 7.23E-01 |
| <b>FUBP1</b>        | 0.01  | 9.60E-01 | 1.00E+00 | 0.31  | 1.66E-01 | 7.23E-01 |
| <b>ZNF133</b>       | -0.03 | 8.65E-01 | 1.00E+00 | 0.31  | 1.66E-01 | 7.23E-01 |
| <b>RAB2A</b>        | 0.24  | 2.20E-01 | 1.00E+00 | -0.41 | 1.66E-01 | 7.23E-01 |
| <b>ADGRG5</b>       | -0.56 | 3.55E-01 | 1.00E+00 | 1.24  | 1.66E-01 | 7.23E-01 |
| <b>YIPF4</b>        | 0.34  | 4.87E-02 | 1.00E+00 | -0.28 | 1.66E-01 | 7.23E-01 |
| <b>RNU6-137P</b>    | -0.46 | 4.46E-01 | 1.00E+00 | -1.22 | 1.66E-01 | 7.23E-01 |
| <b>SLC39A9</b>      | 0.36  | 1.55E-01 | 1.00E+00 | 0.22  | 1.66E-01 | 7.23E-01 |
| <b>PIK3C2A</b>      | 0.03  | 8.92E-01 | 1.00E+00 | -0.19 | 1.66E-01 | 7.23E-01 |
| <b>LINC00963</b>    | -0.46 | 5.84E-02 | 1.00E+00 | 0.52  | 1.66E-01 | 7.23E-01 |
| <b>AKAP2</b>        | -2.23 | 3.53E-01 | 1.00E+00 | 0.87  | 1.66E-01 | 7.23E-01 |
| <b>SLC27A5</b>      | 0.04  | 8.79E-01 | 1.00E+00 | -0.48 | 1.66E-01 | 7.24E-01 |
| <b>DSCAS</b>        | -0.78 | 8.20E-01 | 1.00E+00 | 1.41  | 1.66E-01 | 7.24E-01 |
| <b>AGPAT2</b>       | 0.96  | 9.94E-02 | 1.00E+00 | -0.77 | 1.66E-01 | 7.24E-01 |
| <b>LRRC37A7P</b>    | -0.08 | 8.37E-01 | 1.00E+00 | -0.68 | 1.66E-01 | 7.24E-01 |
| <b>CENPV</b>        | 0.17  | 7.76E-01 | 1.00E+00 | -1.23 | 1.66E-01 | 7.24E-01 |
| <b>BCL2L12</b>      | -0.32 | 2.75E-01 | 1.00E+00 | 0.46  | 1.66E-01 | 7.24E-01 |
| <b>CD164</b>        | 0.48  | 1.84E-01 | 1.00E+00 | -0.42 | 1.66E-01 | 7.24E-01 |
| <b>NEIL2</b>        | -0.14 | 5.33E-01 | 1.00E+00 | -0.32 | 1.66E-01 | 7.24E-01 |
| <b>KRT223P</b>      | 3.43  | 1.67E-01 | 1.00E+00 | -1.39 | 1.66E-01 | 7.24E-01 |
| <b>AC079781.4</b>   | -0.03 | 9.52E-01 | 1.00E+00 | -1.01 | 1.66E-01 | 7.24E-01 |
| <b>PCDHGB3</b>      | -0.27 | 5.71E-01 | 1.00E+00 | -1.23 | 1.66E-01 | 7.24E-01 |

|             |       |          |          |       |          |          |
|-------------|-------|----------|----------|-------|----------|----------|
| VBP1        | 0.07  | 7.44E-01 | 1.00E+00 | -0.37 | 1.66E-01 | 7.24E-01 |
| ZNF710      | -0.58 | 1.04E-01 | 1.00E+00 | 0.82  | 1.66E-01 | 7.24E-01 |
| CYP26A1     | -0.54 | 8.39E-01 | 1.00E+00 | -2.26 | 1.66E-01 | 7.24E-01 |
| LYN         | -0.34 | 1.37E-01 | 1.00E+00 | 1.00  | 1.66E-01 | 7.24E-01 |
| XLOC_001583 | -2.33 | 1.74E-01 | 1.00E+00 | 1.84  | 1.67E-01 | 7.24E-01 |
| HRH1        | -0.17 | 6.40E-01 | 1.00E+00 | 0.57  | 1.67E-01 | 7.24E-01 |
| NOL4        | -2.70 | 4.63E-02 | 1.00E+00 | -1.91 | 1.67E-01 | 7.24E-01 |
| PTGES       | -0.21 | 5.14E-01 | 1.00E+00 | 0.49  | 1.67E-01 | 7.24E-01 |
| C3orf58     | -0.19 | 6.29E-01 | 1.00E+00 | -0.39 | 1.67E-01 | 7.24E-01 |
| GPATCH3     | -0.14 | 4.84E-01 | 1.00E+00 | 0.29  | 1.67E-01 | 7.24E-01 |
| IKBKB       | -0.04 | 8.54E-01 | 1.00E+00 | 0.48  | 1.67E-01 | 7.24E-01 |
| MTMR2       | 0.05  | 8.16E-01 | 1.00E+00 | -0.25 | 1.67E-01 | 7.25E-01 |
| FCRLB       | -0.11 | 8.61E-01 | 1.00E+00 | 0.75  | 1.67E-01 | 7.25E-01 |
| AC091868.2  | 0.64  | 3.08E-01 | 1.00E+00 | -1.61 | 1.67E-01 | 7.25E-01 |
| UGT2B15     | 0.41  | 8.42E-01 | 1.00E+00 | -2.59 | 1.67E-01 | 7.25E-01 |
| ZNF592      | -0.11 | 6.33E-01 | 1.00E+00 | 0.65  | 1.67E-01 | 7.25E-01 |
| AL031729.1  | -1.57 | 4.35E-01 | 1.00E+00 | -0.88 | 1.67E-01 | 7.25E-01 |
| G38528      | -1.14 | 5.10E-01 | 1.00E+00 | 1.24  | 1.67E-01 | 7.25E-01 |
| CNOT9       | -0.03 | 9.15E-01 | 1.00E+00 | 0.40  | 1.67E-01 | 7.25E-01 |
| ITM2B       | -0.01 | 9.69E-01 | 1.00E+00 | -0.34 | 1.67E-01 | 7.25E-01 |
| COL9A1      | 1.73  | 1.71E-01 | 1.00E+00 | 1.42  | 1.67E-01 | 7.25E-01 |
| OSGEP       | 0.07  | 7.42E-01 | 1.00E+00 | 0.23  | 1.67E-01 | 7.25E-01 |
| SEL1L2      | -1.18 | 5.32E-01 | 1.00E+00 | -1.28 | 1.67E-01 | 7.25E-01 |
| AC015971.1  | -2.07 | 3.41E-01 | 1.00E+00 | -1.33 | 1.67E-01 | 7.25E-01 |
| DIRC1       | -2.31 | 1.17E-01 | 1.00E+00 | 1.45  | 1.67E-01 | 7.25E-01 |
| FCRL3       | -3.63 | 7.91E-02 | 1.00E+00 | 2.14  | 1.67E-01 | 7.25E-01 |
| SHKBP1      | -0.42 | 8.47E-02 | 1.00E+00 | 0.35  | 1.68E-01 | 7.25E-01 |
| ASPHD1      | -2.30 | 2.97E-03 | 2.86E-01 | 1.20  | 1.68E-01 | 7.25E-01 |
| LINC01625   | 0.16  | 8.58E-01 | 1.00E+00 | 1.43  | 1.68E-01 | 7.26E-01 |
| BCLAF3      | -0.19 | 4.35E-01 | 1.00E+00 | -0.47 | 1.68E-01 | 7.26E-01 |
| DSTN        | -0.11 | 5.84E-01 | 1.00E+00 | -0.40 | 1.68E-01 | 7.26E-01 |
| DLX4        | -0.87 | 7.18E-02 | 1.00E+00 | -0.82 | 1.68E-01 | 7.26E-01 |

|                   |        |          |          |       |          |          |
|-------------------|--------|----------|----------|-------|----------|----------|
| <b>CCDC88C</b>    | -0.58  | 2.50E-02 | 9.28E-01 | 0.80  | 1.68E-01 | 7.26E-01 |
| <b>ESRRG</b>      | 0.04   | 9.65E-01 | 1.00E+00 | -0.99 | 1.68E-01 | 7.26E-01 |
| <b>FTH1P11</b>    | 1.79   | 4.99E-01 | 1.00E+00 | -0.91 | 1.68E-01 | 7.26E-01 |
| <b>NAPSB</b>      | -0.27  | 5.69E-01 | 1.00E+00 | 1.02  | 1.68E-01 | 7.26E-01 |
| <b>ERG28</b>      | -0.13  | 6.66E-01 | 1.00E+00 | -0.53 | 1.68E-01 | 7.26E-01 |
| <b>SAMHD1</b>     | 0.45   | 2.71E-01 | 1.00E+00 | 0.80  | 1.68E-01 | 7.26E-01 |
| <b>AC136475.7</b> | 0.99   | 7.02E-01 | 1.00E+00 | 1.71  | 1.68E-01 | 7.26E-01 |
| <b>AP000813.1</b> | -0.15  | 9.02E-01 | 1.00E+00 | -1.11 | 1.68E-01 | 7.26E-01 |
| <b>HIBCH</b>      | 0.05   | 8.34E-01 | 1.00E+00 | -0.49 | 1.68E-01 | 7.26E-01 |
| <b>UNC80</b>      | -1.80  | 6.71E-02 | 1.00E+00 | -1.38 | 1.68E-01 | 7.26E-01 |
| <b>GSTP1</b>      | -0.02  | 9.42E-01 | 1.00E+00 | 0.29  | 1.68E-01 | 7.26E-01 |
| <b>NAGK</b>       | -0.15  | 5.41E-01 | 1.00E+00 | 0.40  | 1.68E-01 | 7.26E-01 |
| <b>ST6GAL2</b>    | 0.25   | 7.19E-01 | 1.00E+00 | -0.98 | 1.68E-01 | 7.26E-01 |
| <b>AL391056.1</b> | -0.93  | 3.23E-01 | 1.00E+00 | 1.95  | 1.68E-01 | 7.26E-01 |
| <b>OR7E12P</b>    | 1.01   | 4.36E-01 | 1.00E+00 | -1.81 | 1.68E-01 | 7.26E-01 |
| <b>AKT2</b>       | 0.11   | 6.48E-01 | 1.00E+00 | 0.78  | 1.68E-01 | 7.26E-01 |
| <b>LYPLA2</b>     | -0.10  | 6.69E-01 | 1.00E+00 | 0.24  | 1.68E-01 | 7.26E-01 |
| <b>UBXN7</b>      | 0.04   | 8.08E-01 | 1.00E+00 | -0.42 | 1.68E-01 | 7.26E-01 |
| <b>CNTN5</b>      | -10.95 | 1.38E-03 | 2.02E-01 | 4.34  | 1.68E-01 | 7.26E-01 |
| <b>AHCYL1</b>     | 0.06   | 7.27E-01 | 1.00E+00 | -0.52 | 1.68E-01 | 7.26E-01 |
| <b>SHANK1</b>     | -1.11  | 4.11E-02 | 1.00E+00 | 1.64  | 1.69E-01 | 7.26E-01 |
| <b>SGK1</b>       | -0.45  | 1.91E-01 | 1.00E+00 | 0.44  | 1.69E-01 | 7.26E-01 |
| <b>AL512353.1</b> | 0.26   | 7.97E-01 | 1.00E+00 | 0.64  | 1.69E-01 | 7.26E-01 |
| <b>PRDX2</b>      | -0.05  | 8.16E-01 | 1.00E+00 | -0.62 | 1.69E-01 | 7.26E-01 |
| <b>AC011352.1</b> | 0.39   | 5.54E-01 | 1.00E+00 | -0.84 | 1.69E-01 | 7.26E-01 |
| <b>TMEM211</b>    | -1.96  | 1.27E-01 | 1.00E+00 | -1.16 | 1.69E-01 | 7.26E-01 |
| <b>CCL22</b>      | -0.35  | 5.75E-01 | 1.00E+00 | -0.64 | 1.69E-01 | 7.26E-01 |
| <b>PLIN5</b>      | 1.42   | 5.66E-02 | 1.00E+00 | -1.06 | 1.69E-01 | 7.26E-01 |
| <b>WDR93</b>      | 1.05   | 4.70E-01 | 1.00E+00 | -1.14 | 1.69E-01 | 7.27E-01 |
| <b>NAGS</b>       | -0.51  | 2.14E-01 | 1.00E+00 | 0.82  | 1.69E-01 | 7.27E-01 |
| <b>CD6</b>        | -0.29  | 5.95E-01 | 1.00E+00 | 1.23  | 1.69E-01 | 7.27E-01 |
| <b>NDUFB4</b>     | -0.19  | 2.14E-01 | 1.00E+00 | -0.43 | 1.69E-01 | 7.27E-01 |

|                    |       |          |          |       |          |          |
|--------------------|-------|----------|----------|-------|----------|----------|
| <b>AC080038.1</b>  | -0.99 | 2.00E-01 | 1.00E+00 | -1.14 | 1.69E-01 | 7.27E-01 |
| <b>MYCBPAP</b>     | -0.81 | 4.15E-01 | 1.00E+00 | 1.08  | 1.69E-01 | 7.27E-01 |
| <b>HDAC1P2</b>     | 1.05  | 7.55E-01 | 1.00E+00 | -2.06 | 1.69E-01 | 7.27E-01 |
| <b>PJA2</b>        | -0.05 | 7.66E-01 | 1.00E+00 | -0.22 | 1.69E-01 | 7.27E-01 |
| <b>MOCS2</b>       | -0.04 | 8.87E-01 | 1.00E+00 | -0.41 | 1.69E-01 | 7.27E-01 |
| <b>IL1R1</b>       | 0.33  | 2.03E-01 | 1.00E+00 | 0.66  | 1.69E-01 | 7.27E-01 |
| <b>NOB1</b>        | -0.14 | 4.92E-01 | 1.00E+00 | 0.33  | 1.69E-01 | 7.27E-01 |
| <b>SKAP2</b>       | 0.10  | 6.72E-01 | 1.00E+00 | -0.28 | 1.69E-01 | 7.27E-01 |
| <b>FLJ46284</b>    | 1.02  | 6.28E-01 | 1.00E+00 | 1.32  | 1.69E-01 | 7.27E-01 |
| <b>AC040162.1</b>  | 1.66  | 1.52E-01 | 1.00E+00 | 0.98  | 1.69E-01 | 7.27E-01 |
| <b>XLOC_000578</b> | -0.89 | 6.17E-01 | 1.00E+00 | -2.06 | 1.69E-01 | 7.27E-01 |
| <b>AC092017.2</b>  | 0.19  | 9.39E-01 | 1.00E+00 | -1.04 | 1.69E-01 | 7.27E-01 |
| <b>DARS</b>        | 0.05  | 8.07E-01 | 1.00E+00 | -0.30 | 1.69E-01 | 7.27E-01 |
| <b>AC107068.1</b>  | 0.29  | 6.18E-01 | 1.00E+00 | 0.93  | 1.69E-01 | 7.27E-01 |
| <b>C12orf80</b>    | -1.46 | 5.54E-01 | 1.00E+00 | -1.51 | 1.69E-01 | 7.27E-01 |
| <b>OBP2B</b>       | -0.53 | 5.57E-01 | 1.00E+00 | -1.18 | 1.70E-01 | 7.27E-01 |
| <b>ZNF620</b>      | 0.37  | 3.93E-01 | 1.00E+00 | 0.59  | 1.70E-01 | 7.27E-01 |
| <b>RASSF2</b>      | 0.34  | 4.11E-01 | 1.00E+00 | 0.78  | 1.70E-01 | 7.27E-01 |
| <b>SDCBP2-AS1</b>  | 0.86  | 1.45E-01 | 1.00E+00 | 0.69  | 1.70E-01 | 7.27E-01 |
| <b>MS4A4A</b>      | 1.06  | 4.64E-02 | 1.00E+00 | 0.87  | 1.70E-01 | 7.27E-01 |
| <b>ZSWIM6</b>      | -0.26 | 3.60E-01 | 1.00E+00 | 0.61  | 1.70E-01 | 7.27E-01 |
| <b>RWDD1</b>       | 0.13  | 5.20E-01 | 1.00E+00 | -0.26 | 1.70E-01 | 7.27E-01 |
| <b>TAF9B</b>       | 0.04  | 8.97E-01 | 1.00E+00 | -0.41 | 1.70E-01 | 7.27E-01 |
| <b>FCGR1A</b>      | -0.84 | 2.47E-01 | 1.00E+00 | 4.30  | 1.70E-01 | 7.27E-01 |
| <b>MCM3AP-AS1</b>  | 0.34  | 4.64E-01 | 1.00E+00 | 0.63  | 1.70E-01 | 7.27E-01 |
| <b>AC079880.1</b>  | 1.68  | 2.04E-01 | 1.00E+00 | -0.66 | 1.70E-01 | 7.27E-01 |
| <b>MGC32805</b>    | -1.23 | 3.25E-01 | 1.00E+00 | -1.28 | 1.70E-01 | 7.27E-01 |
| <b>RNF103</b>      | 0.22  | 2.94E-01 | 1.00E+00 | -0.42 | 1.70E-01 | 7.27E-01 |
| <b>PRELID1</b>     | -0.15 | 5.98E-01 | 1.00E+00 | 0.37  | 1.70E-01 | 7.27E-01 |
| <b>SNX24</b>       | 0.13  | 6.17E-01 | 1.00E+00 | -0.34 | 1.70E-01 | 7.27E-01 |
| <b>S1PR5</b>       | 0.02  | 9.53E-01 | 1.00E+00 | -0.65 | 1.70E-01 | 7.28E-01 |
| <b>ATP6V0A4</b>    | 0.01  | 9.90E-01 | 1.00E+00 | -0.96 | 1.70E-01 | 7.28E-01 |



|                   |       |          |          |       |          |          |
|-------------------|-------|----------|----------|-------|----------|----------|
| <b>PSMG2</b>      | 0.02  | 9.35E-01 | 1.00E+00 | -0.30 | 1.70E-01 | 7.28E-01 |
| <b>AC022613.3</b> | -0.67 | 8.48E-01 | 1.00E+00 | 1.74  | 1.70E-01 | 7.28E-01 |
| <b>TBC1D19</b>    | 0.06  | 8.78E-01 | 1.00E+00 | -0.50 | 1.70E-01 | 7.28E-01 |
| <b>FMNL3</b>      | -0.09 | 8.18E-01 | 1.00E+00 | 1.02  | 1.70E-01 | 7.28E-01 |
| <b>OSGIN2</b>     | 0.29  | 4.09E-01 | 1.00E+00 | -0.57 | 1.70E-01 | 7.28E-01 |
| <b>FADS3</b>      | 1.37  | 2.13E-01 | 1.00E+00 | -0.99 | 1.70E-01 | 7.28E-01 |
| <b>PRMT5</b>      | -0.16 | 4.85E-01 | 1.00E+00 | 0.30  | 1.70E-01 | 7.28E-01 |
| <b>ADD3-AS1</b>   | 0.95  | 1.48E-01 | 1.00E+00 | 1.03  | 1.70E-01 | 7.28E-01 |
| <b>ARHGEF9</b>    | -0.14 | 5.64E-01 | 1.00E+00 | 0.35  | 1.70E-01 | 7.28E-01 |
| <b>GNAO1</b>      | -0.98 | 3.27E-02 | 1.00E+00 | 1.07  | 1.70E-01 | 7.28E-01 |
| <b>AC008543.1</b> | -0.21 | 8.11E-01 | 1.00E+00 | -1.24 | 1.70E-01 | 7.28E-01 |
| <b>IL18RAP</b>    | 0.08  | 9.60E-01 | 1.00E+00 | 2.00  | 1.70E-01 | 7.28E-01 |
| <b>ERMP1</b>      | -0.13 | 6.60E-01 | 1.00E+00 | -0.58 | 1.71E-01 | 7.28E-01 |
| <b>MBNL3</b>      | 0.08  | 7.55E-01 | 1.00E+00 | -0.35 | 1.71E-01 | 7.28E-01 |
| <b>TMEM167B</b>   | 0.17  | 3.59E-01 | 1.00E+00 | -0.31 | 1.71E-01 | 7.28E-01 |
| <b>ARF4-AS1</b>   | 0.63  | 6.80E-01 | 1.00E+00 | -0.92 | 1.71E-01 | 7.28E-01 |
| <b>AC023051.1</b> | -0.03 | 9.90E-01 | 1.00E+00 | -0.99 | 1.71E-01 | 7.28E-01 |
| <b>ENPP7P7</b>    | -1.54 | 2.81E-01 | 1.00E+00 | -1.19 | 1.71E-01 | 7.28E-01 |
| <b>ADAR</b>       | 0.05  | 8.63E-01 | 1.00E+00 | 0.58  | 1.71E-01 | 7.28E-01 |
| <b>ATP6V0C</b>    | -0.33 | 6.55E-01 | 1.00E+00 | 0.94  | 1.71E-01 | 7.28E-01 |
| <b>ELOC</b>       | 0.06  | 6.90E-01 | 1.00E+00 | -0.37 | 1.71E-01 | 7.28E-01 |
| <b>LINC01881</b>  | 0.18  | 8.04E-01 | 1.00E+00 | -0.57 | 1.71E-01 | 7.28E-01 |
| <b>USP22</b>      | 0.20  | 5.08E-01 | 1.00E+00 | 0.42  | 1.71E-01 | 7.29E-01 |
| <b>PTMAP2</b>     | -0.06 | 8.50E-01 | 1.00E+00 | -0.60 | 1.71E-01 | 7.29E-01 |
| <b>UIMC1</b>      | -0.19 | 3.15E-01 | 1.00E+00 | 0.27  | 1.71E-01 | 7.29E-01 |
| <b>AC083837.2</b> | 0.04  | 9.55E-01 | 1.00E+00 | 0.76  | 1.71E-01 | 7.29E-01 |
| <b>AC015819.1</b> | 0.63  | 6.29E-01 | 1.00E+00 | 1.70  | 1.71E-01 | 7.29E-01 |
| <b>GAS6-AS1</b>   | -0.23 | 8.05E-01 | 1.00E+00 | 1.27  | 1.71E-01 | 7.29E-01 |
| <b>ANKEF1</b>     | -0.34 | 2.04E-01 | 1.00E+00 | -0.43 | 1.71E-01 | 7.29E-01 |
| <b>DET1</b>       | 0.74  | 4.93E-01 | 1.00E+00 | -1.20 | 1.71E-01 | 7.29E-01 |
| <b>EID1</b>       | 0.02  | 9.52E-01 | 1.00E+00 | -0.47 | 1.71E-01 | 7.29E-01 |
| <b>PRKAR2B</b>    | 1.56  | 3.44E-02 | 1.00E+00 | -0.96 | 1.71E-01 | 7.29E-01 |

|                   |        |          |          |       |          |          |
|-------------------|--------|----------|----------|-------|----------|----------|
| <b>RBM48</b>      | -0.01  | 9.48E-01 | 1.00E+00 | -0.50 | 1.71E-01 | 7.29E-01 |
| <b>PIK3R6</b>     | -0.28  | 7.24E-01 | 1.00E+00 | 1.09  | 1.72E-01 | 7.30E-01 |
| <b>SH3BP2</b>     | 0.03   | 9.00E-01 | 1.00E+00 | 0.47  | 1.72E-01 | 7.30E-01 |
| <b>AC131097.4</b> | 0.20   | 8.91E-01 | 1.00E+00 | 1.69  | 1.72E-01 | 7.30E-01 |
| <b>AL162741.1</b> | -1.49  | 2.89E-01 | 1.00E+00 | 1.61  | 1.72E-01 | 7.30E-01 |
| <b>SPINK2</b>     | -0.08  | 9.31E-01 | 1.00E+00 | 0.73  | 1.72E-01 | 7.30E-01 |
| <b>PEAK1</b>      | -0.13  | 6.78E-01 | 1.00E+00 | 0.70  | 1.72E-01 | 7.30E-01 |
| <b>SLC7A11</b>    | -1.01  | 1.56E-01 | 1.00E+00 | 0.77  | 1.72E-01 | 7.30E-01 |
| <b>SLC24A1</b>    | 0.02   | 9.55E-01 | 1.00E+00 | 0.66  | 1.72E-01 | 7.30E-01 |
| <b>FCF1</b>       | 0.45   | 1.54E-02 | 7.70E-01 | 0.28  | 1.72E-01 | 7.30E-01 |
| <b>ITGB1BP2</b>   | 1.26   | 3.44E-01 | 1.00E+00 | 1.62  | 1.72E-01 | 7.30E-01 |
| <b>BRD7P2</b>     | 0.52   | 6.38E-01 | 1.00E+00 | -0.62 | 1.72E-01 | 7.30E-01 |
| <b>AHSG</b>       | -1.75  | 2.93E-01 | 1.00E+00 | 2.13  | 1.72E-01 | 7.30E-01 |
| <b>SYT9</b>       | 0.90   | 9.28E-02 | 1.00E+00 | -1.62 | 1.72E-01 | 7.30E-01 |
| <b>ZNF75A</b>     | 0.19   | 5.45E-01 | 1.00E+00 | -0.32 | 1.72E-01 | 7.30E-01 |
| <b>COX6A1</b>     | -0.16  | 5.53E-01 | 1.00E+00 | -0.87 | 1.72E-01 | 7.30E-01 |
| <b>NSMAF</b>      | 0.09   | 6.29E-01 | 1.00E+00 | -0.32 | 1.72E-01 | 7.30E-01 |
| <b>GMPPSP1</b>    | 0.29   | 9.29E-01 | 1.00E+00 | -0.79 | 1.72E-01 | 7.30E-01 |
| <b>AC073130.2</b> | 1.17   | 7.02E-01 | 1.00E+00 | -1.52 | 1.72E-01 | 7.30E-01 |
| <b>BOLA1</b>      | -0.02  | 9.31E-01 | 1.00E+00 | -0.30 | 1.72E-01 | 7.30E-01 |
| <b>LINC01950</b>  | -4.26  | 1.62E-01 | 1.00E+00 | -1.71 | 1.72E-01 | 7.30E-01 |
| <b>AL078645.2</b> | -1.69  | 5.76E-01 | 1.00E+00 | -2.79 | 1.72E-01 | 7.30E-01 |
| <b>PROB1</b>      | -0.45  | 1.41E-01 | 1.00E+00 | 1.32  | 1.72E-01 | 7.30E-01 |
| <b>NPAS4</b>      | -0.94  | 6.64E-01 | 1.00E+00 | 1.07  | 1.72E-01 | 7.30E-01 |
| <b>STX10</b>      | -0.07  | 7.06E-01 | 1.00E+00 | 0.24  | 1.72E-01 | 7.30E-01 |
| <b>AC079313.1</b> | 1.74   | 3.72E-01 | 1.00E+00 | -1.21 | 1.72E-01 | 7.30E-01 |
| <b>AC022079.1</b> | 0.32   | 9.26E-01 | 1.00E+00 | -2.00 | 1.73E-01 | 7.30E-01 |
| <b>SYT4</b>       | -14.45 | 2.36E-05 | 6.87E-03 | -2.82 | 1.73E-01 | 7.30E-01 |
| <b>LINC01857</b>  | -1.52  | 6.60E-01 | 1.00E+00 | 3.39  | 1.73E-01 | 7.30E-01 |
| <b>SAMMSON</b>    | -0.42  | 8.62E-01 | 1.00E+00 | 2.11  | 1.73E-01 | 7.30E-01 |
| <b>SNX25P1</b>    | 0.16   | 9.39E-01 | 1.00E+00 | 1.99  | 1.73E-01 | 7.30E-01 |
| <b>SPINT1-AS1</b> | 0.44   | 1.44E-01 | 1.00E+00 | -0.81 | 1.73E-01 | 7.30E-01 |

|               |       |          |          |       |          |          |
|---------------|-------|----------|----------|-------|----------|----------|
| KLHDC4        | -0.10 | 6.61E-01 | 1.00E+00 | 0.51  | 1.73E-01 | 7.30E-01 |
| HSPB9         | -0.02 | 9.83E-01 | 1.00E+00 | 0.87  | 1.73E-01 | 7.30E-01 |
| TENT5A        | 0.16  | 6.79E-01 | 1.00E+00 | 0.31  | 1.73E-01 | 7.31E-01 |
| AL390760.1    | -2.87 | 1.22E-01 | 1.00E+00 | 1.56  | 1.73E-01 | 7.31E-01 |
| LOXL2         | -0.08 | 8.95E-01 | 1.00E+00 | 0.83  | 1.73E-01 | 7.31E-01 |
| XRN2          | -0.04 | 8.39E-01 | 1.00E+00 | 0.20  | 1.73E-01 | 7.31E-01 |
| ATP23         | 0.23  | 2.76E-01 | 1.00E+00 | -0.48 | 1.73E-01 | 7.31E-01 |
| AC068446.1    | -1.72 | 4.08E-01 | 1.00E+00 | 1.11  | 1.73E-01 | 7.31E-01 |
| GMDS-DT       | 0.20  | 7.12E-01 | 1.00E+00 | -0.62 | 1.73E-01 | 7.31E-01 |
| TCP11         | -1.78 | 3.06E-02 | 1.00E+00 | 1.17  | 1.73E-01 | 7.31E-01 |
| G6795         | -0.95 | 4.70E-01 | 1.00E+00 | -1.36 | 1.73E-01 | 7.31E-01 |
| RPS5          | -0.19 | 5.74E-01 | 1.00E+00 | 0.37  | 1.73E-01 | 7.31E-01 |
| TEX26-AS1     | 1.30  | 2.49E-01 | 1.00E+00 | 1.22  | 1.73E-01 | 7.31E-01 |
| CELF1         | 0.19  | 3.91E-01 | 1.00E+00 | -0.26 | 1.73E-01 | 7.31E-01 |
| GRAMD2A       | -0.52 | 8.12E-02 | 1.00E+00 | 0.80  | 1.73E-01 | 7.31E-01 |
| SLC50A1       | -0.26 | 2.51E-01 | 1.00E+00 | -0.28 | 1.73E-01 | 7.31E-01 |
| YWHAH         | -0.26 | 3.31E-01 | 1.00E+00 | -0.72 | 1.73E-01 | 7.31E-01 |
| TNFRSF10C     | 0.26  | 7.75E-01 | 1.00E+00 | 1.06  | 1.73E-01 | 7.31E-01 |
| AC008035.1    | -0.67 | 2.06E-01 | 1.00E+00 | -0.88 | 1.73E-01 | 7.31E-01 |
| SLC25A26      | 0.22  | 3.06E-01 | 1.00E+00 | -0.35 | 1.73E-01 | 7.31E-01 |
| MRPL13        | 0.01  | 9.39E-01 | 1.00E+00 | -0.56 | 1.73E-01 | 7.31E-01 |
| SPRED3        | -0.98 | 3.53E-02 | 1.00E+00 | 1.21  | 1.73E-01 | 7.31E-01 |
| AC239800.2    | 1.10  | 2.51E-01 | 1.00E+00 | -0.88 | 1.74E-01 | 7.31E-01 |
| RP11-187C18.3 | -3.44 | 2.75E-01 | 1.00E+00 | -1.37 | 1.74E-01 | 7.31E-01 |
| RILPL2        | 0.13  | 6.89E-01 | 1.00E+00 | 0.68  | 1.74E-01 | 7.31E-01 |
| SYNDIG1       | -0.57 | 4.98E-01 | 1.00E+00 | 1.53  | 1.74E-01 | 7.31E-01 |
| HAND1         | 1.33  | 4.79E-01 | 1.00E+00 | 3.08  | 1.74E-01 | 7.31E-01 |
| CENPBD1       | -0.13 | 6.17E-01 | 1.00E+00 | -0.24 | 1.74E-01 | 7.31E-01 |
| COP1          | 0.14  | 4.15E-01 | 1.00E+00 | -0.58 | 1.74E-01 | 7.31E-01 |
| KLHL7         | 0.34  | 1.47E-01 | 1.00E+00 | -0.35 | 1.74E-01 | 7.31E-01 |
| THEM6         | -0.29 | 1.90E-01 | 1.00E+00 | -0.36 | 1.74E-01 | 7.31E-01 |
| ZBED6CL       | -0.07 | 8.98E-01 | 1.00E+00 | 0.95  | 1.74E-01 | 7.31E-01 |

|             |       |          |          |       |          |          |
|-------------|-------|----------|----------|-------|----------|----------|
| SLC1A2      | -0.76 | 8.12E-01 | 1.00E+00 | 0.71  | 1.74E-01 | 7.31E-01 |
| EPPK1       | -0.36 | 5.26E-01 | 1.00E+00 | -0.94 | 1.74E-01 | 7.31E-01 |
| MARS        | -0.24 | 5.27E-01 | 1.00E+00 | 0.23  | 1.74E-01 | 7.31E-01 |
| S100A13     | -0.24 | 7.14E-01 | 1.00E+00 | -0.84 | 1.74E-01 | 7.31E-01 |
| TGFB1       | -0.46 | 4.47E-02 | 1.00E+00 | 1.30  | 1.74E-01 | 7.31E-01 |
| PINLYP      | -0.31 | 4.96E-01 | 1.00E+00 | 0.52  | 1.74E-01 | 7.31E-01 |
| NEMF        | 0.24  | 1.36E-01 | 1.00E+00 | -0.35 | 1.74E-01 | 7.31E-01 |
| AC010883.1  | -0.93 | 6.51E-01 | 1.00E+00 | -1.11 | 1.74E-01 | 7.31E-01 |
| NPIPB11     | -1.98 | 1.46E-01 | 1.00E+00 | 1.20  | 1.74E-01 | 7.31E-01 |
| MALRD1      | 0.51  | 6.05E-01 | 1.00E+00 | 1.12  | 1.74E-01 | 7.31E-01 |
| RNPS1P1     | -1.31 | 5.30E-01 | 1.00E+00 | -0.72 | 1.74E-01 | 7.31E-01 |
| ZKSCAN2     | 0.12  | 7.20E-01 | 1.00E+00 | 0.83  | 1.74E-01 | 7.31E-01 |
| F11R        | 0.17  | 3.01E-01 | 1.00E+00 | -0.30 | 1.74E-01 | 7.31E-01 |
| G9021       | -0.35 | 7.85E-01 | 1.00E+00 | 1.07  | 1.74E-01 | 7.31E-01 |
| FAR2        | 0.09  | 8.63E-01 | 1.00E+00 | -0.87 | 1.74E-01 | 7.31E-01 |
| MAGI2-AS3   | 0.29  | 5.74E-01 | 1.00E+00 | -0.78 | 1.74E-01 | 7.31E-01 |
| RPTOR       | -0.18 | 4.63E-01 | 1.00E+00 | 0.82  | 1.75E-01 | 7.31E-01 |
| CEP164      | -0.10 | 6.87E-01 | 1.00E+00 | 0.61  | 1.75E-01 | 7.31E-01 |
| PPARGC1A    | 0.00  | 1.00E+00 | 1.00E+00 | -0.79 | 1.75E-01 | 7.31E-01 |
| LYPLAL1     | 0.15  | 5.04E-01 | 1.00E+00 | -0.64 | 1.75E-01 | 7.31E-01 |
| EDA         | 0.31  | 3.64E-01 | 1.00E+00 | -0.66 | 1.75E-01 | 7.31E-01 |
| LINC00271   | -0.16 | 8.42E-01 | 1.00E+00 | -0.85 | 1.75E-01 | 7.31E-01 |
| CDYL2       | -0.45 | 1.46E-01 | 1.00E+00 | 0.98  | 1.75E-01 | 7.31E-01 |
| SIGIRR      | -0.02 | 9.53E-01 | 1.00E+00 | 0.45  | 1.75E-01 | 7.31E-01 |
| AL590723.1  | 0.04  | 9.68E-01 | 1.00E+00 | 1.06  | 1.75E-01 | 7.31E-01 |
| AP001462.1  | -0.85 | 2.94E-01 | 1.00E+00 | -0.71 | 1.75E-01 | 7.31E-01 |
| XLOC_002116 | 0.76  | 5.37E-01 | 1.00E+00 | -2.71 | 1.75E-01 | 7.31E-01 |
| ABCC2       | -0.30 | 6.57E-01 | 1.00E+00 | 1.06  | 1.75E-01 | 7.31E-01 |
| DPPA4       | NA    | NA       | NA       | -1.83 | 1.75E-01 | 7.31E-01 |
| TP53I13     | -0.09 | 7.45E-01 | 1.00E+00 | 0.46  | 1.75E-01 | 7.31E-01 |
| CLDN10-AS1  | 0.18  | 8.71E-01 | 1.00E+00 | -0.92 | 1.75E-01 | 7.31E-01 |
| ZFAND2B     | 0.07  | 7.12E-01 | 1.00E+00 | -0.33 | 1.75E-01 | 7.31E-01 |

|                    |       |          |          |       |          |          |
|--------------------|-------|----------|----------|-------|----------|----------|
| <b>TXNDC2</b>      | 0.52  | 8.50E-01 | 1.00E+00 | 2.64  | 1.75E-01 | 7.31E-01 |
| <b>C5orf63</b>     | -0.18 | 6.76E-01 | 1.00E+00 | -0.55 | 1.75E-01 | 7.31E-01 |
| <b>AC098934.1</b>  | -1.01 | 6.25E-02 | 1.00E+00 | 0.75  | 1.75E-01 | 7.31E-01 |
| <b>AC005865.1</b>  | 0.58  | 8.64E-01 | 1.00E+00 | -2.63 | 1.75E-01 | 7.31E-01 |
| <b>HMGCS2</b>      | 0.52  | 5.38E-01 | 1.00E+00 | -1.11 | 1.75E-01 | 7.31E-01 |
| <b>PIP4P2</b>      | 0.34  | 2.69E-01 | 1.00E+00 | -0.62 | 1.75E-01 | 7.31E-01 |
| <b>G35839</b>      | 1.15  | 9.37E-02 | 1.00E+00 | -1.12 | 1.75E-01 | 7.31E-01 |
| <b>AP005131.1</b>  | -0.36 | 8.31E-01 | 1.00E+00 | 2.01  | 1.75E-01 | 7.31E-01 |
| <b>AC109347.1</b>  | -0.46 | 4.62E-01 | 1.00E+00 | 0.71  | 1.75E-01 | 7.31E-01 |
| <b>AC134878.2</b>  | 0.61  | 5.90E-01 | 1.00E+00 | 1.01  | 1.75E-01 | 7.31E-01 |
| <b>SRPX</b>        | 0.77  | 6.62E-02 | 1.00E+00 | 0.70  | 1.75E-01 | 7.31E-01 |
| <b>PCDH18</b>      | 0.63  | 2.67E-01 | 1.00E+00 | 0.74  | 1.75E-01 | 7.31E-01 |
| <b>G25996</b>      | -0.54 | 8.76E-01 | 1.00E+00 | -1.17 | 1.75E-01 | 7.31E-01 |
| <b>ZNF12</b>       | 0.13  | 4.99E-01 | 1.00E+00 | -0.45 | 1.75E-01 | 7.31E-01 |
| <b>RNGTT</b>       | 0.28  | 1.99E-01 | 1.00E+00 | -0.26 | 1.75E-01 | 7.31E-01 |
| <b>XLOC_007654</b> | -0.08 | 9.40E-01 | 1.00E+00 | 1.81  | 1.75E-01 | 7.31E-01 |
| <b>FAHD2B</b>      | -0.07 | 8.14E-01 | 1.00E+00 | -0.40 | 1.75E-01 | 7.31E-01 |
| <b>PRKCQ-AS1</b>   | -0.83 | 3.99E-01 | 1.00E+00 | 1.30  | 1.75E-01 | 7.31E-01 |
| <b>CLEC12B</b>     | 0.29  | 6.80E-01 | 1.00E+00 | 1.27  | 1.75E-01 | 7.31E-01 |
| <b>CDKL2</b>       | -0.50 | 4.85E-01 | 1.00E+00 | -1.09 | 1.75E-01 | 7.31E-01 |
| <b>LAYN</b>        | 0.22  | 5.67E-01 | 1.00E+00 | 0.57  | 1.76E-01 | 7.31E-01 |
| <b>PANK1</b>       | 0.04  | 9.35E-01 | 1.00E+00 | -0.55 | 1.76E-01 | 7.31E-01 |
| <b>HHIP</b>        | -1.52 | 1.73E-01 | 1.00E+00 | -1.39 | 1.76E-01 | 7.31E-01 |
| <b>AFF2</b>        | 0.39  | 5.55E-01 | 1.00E+00 | -1.08 | 1.76E-01 | 7.31E-01 |
| <b>CACNA1C</b>     | -0.44 | 4.77E-01 | 1.00E+00 | 1.02  | 1.76E-01 | 7.31E-01 |
| <b>RASSF6</b>      | -0.13 | 7.43E-01 | 1.00E+00 | -0.94 | 1.76E-01 | 7.31E-01 |
| <b>XRRA1</b>       | -0.44 | 3.61E-01 | 1.00E+00 | -0.54 | 1.76E-01 | 7.31E-01 |
| <b>ATXN1L</b>      | 0.13  | 4.95E-01 | 1.00E+00 | 0.59  | 1.76E-01 | 7.31E-01 |
| <b>SLC36A4</b>     | -0.19 | 4.67E-01 | 1.00E+00 | -0.32 | 1.76E-01 | 7.31E-01 |
| <b>PRKACA</b>      | -0.11 | 5.40E-01 | 1.00E+00 | 0.69  | 1.76E-01 | 7.31E-01 |
| <b>AC012560.1</b>  | -0.06 | 9.73E-01 | 1.00E+00 | -1.20 | 1.76E-01 | 7.31E-01 |
| <b>MED1</b>        | -0.01 | 9.40E-01 | 1.00E+00 | 0.47  | 1.76E-01 | 7.31E-01 |

|                    |       |          |          |       |          |          |
|--------------------|-------|----------|----------|-------|----------|----------|
| <b>AP000442.1</b>  | -1.10 | 6.40E-01 | 1.00E+00 | -1.38 | 1.76E-01 | 7.31E-01 |
| <b>XLOC_003438</b> | 0.08  | 9.14E-01 | 1.00E+00 | 1.12  | 1.76E-01 | 7.31E-01 |
| <b>AQP2</b>        | -0.11 | 9.38E-01 | 1.00E+00 | -1.26 | 1.76E-01 | 7.31E-01 |
| <b>MOAP1</b>       | 0.00  | 9.81E-01 | 1.00E+00 | -0.23 | 1.76E-01 | 7.31E-01 |
| <b>ZBTB40</b>      | 0.15  | 6.59E-01 | 1.00E+00 | 0.73  | 1.76E-01 | 7.31E-01 |
| <b>PLPP3</b>       | 0.76  | 1.10E-01 | 1.00E+00 | 0.56  | 1.76E-01 | 7.31E-01 |
| <b>AC018755.1</b>  | -0.70 | 5.64E-01 | 1.00E+00 | -1.58 | 1.76E-01 | 7.31E-01 |
| <b>ACADSB</b>      | -0.01 | 9.63E-01 | 1.00E+00 | -0.46 | 1.76E-01 | 7.31E-01 |
| <b>NR5A1</b>       | -1.72 | 2.94E-01 | 1.00E+00 | -2.26 | 1.76E-01 | 7.31E-01 |
| <b>MIR616</b>      | -2.60 | 1.43E-01 | 1.00E+00 | -1.30 | 1.76E-01 | 7.31E-01 |
| <b>NDUFAB1</b>     | 0.05  | 7.86E-01 | 1.00E+00 | -0.51 | 1.76E-01 | 7.31E-01 |
| <b>FFAR4</b>       | 1.50  | 3.29E-02 | 1.00E+00 | -0.63 | 1.76E-01 | 7.31E-01 |
| <b>ST6GALNAC5</b>  | 0.32  | 5.57E-01 | 1.00E+00 | 0.84  | 1.76E-01 | 7.31E-01 |
| <b>C6orf58</b>     | -1.36 | 4.09E-01 | 1.00E+00 | -1.32 | 1.76E-01 | 7.32E-01 |
| <b>TLE3</b>        | -0.32 | 2.27E-01 | 1.00E+00 | 0.44  | 1.76E-01 | 7.32E-01 |
| <b>GATB</b>        | -0.02 | 9.43E-01 | 1.00E+00 | 0.25  | 1.76E-01 | 7.32E-01 |
| <b>NGLY1</b>       | 0.08  | 7.54E-01 | 1.00E+00 | -0.32 | 1.76E-01 | 7.32E-01 |
| <b>TXNIP</b>       | 0.74  | 2.28E-02 | 9.09E-01 | -0.45 | 1.76E-01 | 7.32E-01 |
| <b>KRT42P</b>      | -1.63 | 1.66E-02 | 8.11E-01 | 0.86  | 1.76E-01 | 7.32E-01 |
| <b>AL356275.2</b>  | -0.99 | 6.94E-01 | 1.00E+00 | -1.80 | 1.76E-01 | 7.32E-01 |
| <b>LRR31</b>       | -0.30 | 8.88E-01 | 1.00E+00 | -1.80 | 1.76E-01 | 7.32E-01 |
| <b>MAP3K12</b>     | -0.15 | 6.33E-01 | 1.00E+00 | 1.25  | 1.76E-01 | 7.32E-01 |
| <b>EFEMP2</b>      | 0.44  | 3.46E-01 | 1.00E+00 | 0.67  | 1.77E-01 | 7.32E-01 |
| <b>MAEA</b>        | -0.07 | 7.18E-01 | 1.00E+00 | 0.20  | 1.77E-01 | 7.32E-01 |
| <b>AC092155.1</b>  | -2.36 | 4.01E-01 | 1.00E+00 | -1.85 | 1.77E-01 | 7.32E-01 |
| <b>XLOC_008100</b> | 0.08  | 8.61E-01 | 1.00E+00 | 0.76  | 1.77E-01 | 7.32E-01 |
| <b>TNKS2-AS1</b>   | -0.01 | 9.92E-01 | 1.00E+00 | -1.18 | 1.77E-01 | 7.32E-01 |
| <b>AC009303.4</b>  | -0.05 | 9.30E-01 | 1.00E+00 | 0.70  | 1.77E-01 | 7.32E-01 |
| <b>RAC1</b>        | 0.03  | 8.53E-01 | 1.00E+00 | -0.60 | 1.77E-01 | 7.32E-01 |
| <b>AC020917.4</b>  | -2.86 | 6.46E-02 | 1.00E+00 | 1.21  | 1.77E-01 | 7.32E-01 |
| <b>AC011603.2</b>  | -1.03 | 6.58E-01 | 1.00E+00 | -0.95 | 1.77E-01 | 7.32E-01 |
| <b>FUNDC1</b>      | 0.02  | 9.04E-01 | 1.00E+00 | -0.45 | 1.77E-01 | 7.32E-01 |

|                    |       |          |          |       |          |          |
|--------------------|-------|----------|----------|-------|----------|----------|
| <b>XLOC_013984</b> | -0.76 | 4.53E-01 | 1.00E+00 | 1.87  | 1.77E-01 | 7.32E-01 |
| <b>WNK3</b>        | 0.36  | 5.52E-01 | 1.00E+00 | 0.84  | 1.77E-01 | 7.32E-01 |
| <b>AL136115.1</b>  | -1.75 | 2.25E-01 | 1.00E+00 | 1.19  | 1.77E-01 | 7.32E-01 |
| <b>TARS</b>        | -0.01 | 9.42E-01 | 1.00E+00 | 0.26  | 1.77E-01 | 7.32E-01 |
| <b>RPL37P6</b>     | -2.24 | 2.44E-01 | 1.00E+00 | -0.86 | 1.77E-01 | 7.32E-01 |
| <b>PRKAR2A-AS1</b> | -0.28 | 6.01E-01 | 1.00E+00 | -1.06 | 1.77E-01 | 7.32E-01 |
| <b>TNFSF4</b>      | 0.41  | 5.33E-01 | 1.00E+00 | 1.15  | 1.77E-01 | 7.32E-01 |
| <b>PXN</b>         | 0.20  | 5.31E-01 | 1.00E+00 | 0.53  | 1.77E-01 | 7.32E-01 |
| <b>XPO5</b>        | 0.11  | 6.50E-01 | 1.00E+00 | 0.39  | 1.77E-01 | 7.32E-01 |
| <b>ATP6V1B1</b>    | -0.41 | 7.81E-01 | 1.00E+00 | -1.06 | 1.77E-01 | 7.32E-01 |
| <b>AMPD2</b>       | -0.33 | 1.29E-01 | 1.00E+00 | 0.70  | 1.77E-01 | 7.32E-01 |
| <b>ZBED2</b>       | -0.29 | 5.59E-01 | 1.00E+00 | 0.85  | 1.77E-01 | 7.32E-01 |
| <b>MANEAL</b>      | -0.11 | 7.69E-01 | 1.00E+00 | -0.88 | 1.77E-01 | 7.32E-01 |
| <b>SMIM13</b>      | -0.02 | 9.48E-01 | 1.00E+00 | -0.56 | 1.77E-01 | 7.32E-01 |
| <b>SCN1B</b>       | -0.28 | 5.69E-01 | 1.00E+00 | 1.12  | 1.77E-01 | 7.32E-01 |
| <b>GSTT2</b>       | 0.60  | 4.40E-01 | 1.00E+00 | 0.98  | 1.77E-01 | 7.32E-01 |
| <b>CHSY1</b>       | -0.06 | 7.55E-01 | 1.00E+00 | 0.46  | 1.77E-01 | 7.32E-01 |
| <b>UBAC1</b>       | -0.13 | 6.40E-01 | 1.00E+00 | -0.31 | 1.77E-01 | 7.32E-01 |
| <b>NXPE1</b>       | -0.89 | 7.97E-01 | 1.00E+00 | 2.23  | 1.77E-01 | 7.32E-01 |
| <b>MEST</b>        | 1.51  | 4.20E-02 | 1.00E+00 | -0.91 | 1.77E-01 | 7.32E-01 |
| <b>GLYAT</b>       | 3.86  | 5.20E-02 | 1.00E+00 | -1.45 | 1.77E-01 | 7.32E-01 |
| <b>WIZ</b>         | -0.42 | 1.23E-01 | 1.00E+00 | 0.70  | 1.78E-01 | 7.32E-01 |
| <b>AL807757.2</b>  | -2.64 | 1.93E-01 | 1.00E+00 | 1.48  | 1.78E-01 | 7.32E-01 |
| <b>AC110597.1</b>  | 2.37  | 2.36E-01 | 1.00E+00 | 1.82  | 1.78E-01 | 7.32E-01 |
| <b>CHCHD4</b>      | 0.10  | 6.12E-01 | 1.00E+00 | -0.44 | 1.78E-01 | 7.32E-01 |
| <b>DAB2</b>        | 0.16  | 7.03E-01 | 1.00E+00 | 0.68  | 1.78E-01 | 7.32E-01 |
| <b>FGF7</b>        | 0.55  | 3.08E-01 | 1.00E+00 | 0.61  | 1.78E-01 | 7.32E-01 |
| <b>PHF10</b>       | 0.27  | 7.95E-02 | 1.00E+00 | -0.57 | 1.78E-01 | 7.32E-01 |
| <b>FAM167B</b>     | 0.19  | 7.53E-01 | 1.00E+00 | 0.93  | 1.78E-01 | 7.32E-01 |
| <b>IGFN1</b>       | -2.56 | 1.36E-01 | 1.00E+00 | 2.16  | 1.78E-01 | 7.32E-01 |
| <b>SIGLEC9</b>     | -0.53 | 5.72E-01 | 1.00E+00 | 1.44  | 1.78E-01 | 7.32E-01 |
| <b>C11orf95</b>    | 0.19  | 6.54E-01 | 1.00E+00 | 0.92  | 1.78E-01 | 7.32E-01 |

|                    |       |          |          |       |          |          |
|--------------------|-------|----------|----------|-------|----------|----------|
| <b>DBX2</b>        | 0.97  | 3.05E-01 | 1.00E+00 | -1.34 | 1.78E-01 | 7.32E-01 |
| <b>HOXA5</b>       | -0.48 | 3.07E-01 | 1.00E+00 | -0.57 | 1.78E-01 | 7.33E-01 |
| <b>GPR176</b>      | 0.27  | 5.11E-01 | 1.00E+00 | 0.88  | 1.78E-01 | 7.33E-01 |
| <b>Z95115.1</b>    | 0.04  | 9.10E-01 | 1.00E+00 | -0.69 | 1.78E-01 | 7.33E-01 |
| <b>ACAN</b>        | -0.42 | 6.07E-01 | 1.00E+00 | 1.53  | 1.78E-01 | 7.33E-01 |
| <b>TYMP</b>        | -0.49 | 5.04E-01 | 1.00E+00 | 1.32  | 1.78E-01 | 7.33E-01 |
| <b>SPECC1L</b>     | 0.20  | 4.65E-01 | 1.00E+00 | 0.65  | 1.78E-01 | 7.33E-01 |
| <b>G2E3</b>        | 0.72  | 1.36E-01 | 1.00E+00 | -0.45 | 1.78E-01 | 7.33E-01 |
| <b>GATA3</b>       | 0.11  | 7.93E-01 | 1.00E+00 | -0.75 | 1.78E-01 | 7.33E-01 |
| <b>NBPF9</b>       | -0.12 | 7.10E-01 | 1.00E+00 | 0.55  | 1.78E-01 | 7.33E-01 |
| <b>ARL6IP1</b>     | 0.60  | 2.28E-03 | 2.42E-01 | -0.41 | 1.78E-01 | 7.33E-01 |
| <b>AP2A1</b>       | -0.16 | 5.30E-01 | 1.00E+00 | 0.80  | 1.78E-01 | 7.33E-01 |
| <b>RINL</b>        | -0.15 | 6.14E-01 | 1.00E+00 | 0.32  | 1.78E-01 | 7.33E-01 |
| <b>HTATSF1</b>     | 0.10  | 6.52E-01 | 1.00E+00 | -0.31 | 1.79E-01 | 7.33E-01 |
| <b>AP000547.3</b>  | -0.13 | 7.73E-01 | 1.00E+00 | -0.72 | 1.79E-01 | 7.33E-01 |
| <b>ZNF781</b>      | 0.29  | 7.68E-01 | 1.00E+00 | -1.14 | 1.79E-01 | 7.33E-01 |
| <b>ID1</b>         | -0.81 | 3.35E-02 | 1.00E+00 | 0.43  | 1.79E-01 | 7.33E-01 |
| <b>NPIPB13</b>     | -0.51 | 6.82E-01 | 1.00E+00 | 0.79  | 1.79E-01 | 7.33E-01 |
| <b>AC132008.2</b>  | -0.02 | 9.31E-01 | 1.00E+00 | -0.35 | 1.79E-01 | 7.33E-01 |
| <b>GRK5</b>        | 0.16  | 7.12E-01 | 1.00E+00 | 0.90  | 1.79E-01 | 7.33E-01 |
| <b>AC060766.1</b>  | 1.14  | 1.75E-01 | 1.00E+00 | 1.12  | 1.79E-01 | 7.33E-01 |
| <b>APOL1</b>       | -0.90 | 1.42E-01 | 1.00E+00 | 1.01  | 1.79E-01 | 7.33E-01 |
| <b>SLCO6A1</b>     | -0.80 | 8.18E-01 | 1.00E+00 | -3.87 | 1.79E-01 | 7.33E-01 |
| <b>AC009005.1</b>  | -2.69 | 2.51E-01 | 1.00E+00 | 1.11  | 1.79E-01 | 7.33E-01 |
| <b>LYNX1</b>       | -0.30 | 3.27E-01 | 1.00E+00 | 0.72  | 1.79E-01 | 7.33E-01 |
| <b>AC048382.5</b>  | 1.29  | 2.98E-01 | 1.00E+00 | -0.99 | 1.79E-01 | 7.33E-01 |
| <b>AACSP1</b>      | -0.81 | 4.38E-01 | 1.00E+00 | 2.00  | 1.79E-01 | 7.33E-01 |
| <b>AP000640.1</b>  | 0.56  | 6.22E-01 | 1.00E+00 | 0.81  | 1.79E-01 | 7.33E-01 |
| <b>LRRCC1</b>      | 0.23  | 5.70E-01 | 1.00E+00 | -0.33 | 1.79E-01 | 7.34E-01 |
| <b>XLOC_007531</b> | -2.21 | 5.19E-01 | 1.00E+00 | 2.48  | 1.79E-01 | 7.34E-01 |
| <b>ABL1</b>        | 0.19  | 4.86E-01 | 1.00E+00 | 0.80  | 1.79E-01 | 7.34E-01 |
| <b>CLUHP3</b>      | 0.15  | 8.13E-01 | 1.00E+00 | 0.74  | 1.79E-01 | 7.34E-01 |



|                     |       |          |          |       |          |          |
|---------------------|-------|----------|----------|-------|----------|----------|
| <b>AC103769.1</b>   | -0.13 | 9.20E-01 | 1.00E+00 | 1.08  | 1.79E-01 | 7.34E-01 |
| <b>RP11-203I2.1</b> | -2.01 | 4.55E-02 | 1.00E+00 | 0.85  | 1.79E-01 | 7.34E-01 |
| <b>SERTAD4-AS1</b>  | -0.02 | 9.62E-01 | 1.00E+00 | -0.58 | 1.79E-01 | 7.34E-01 |
| <b>CCDC38</b>       | -1.59 | 6.03E-01 | 1.00E+00 | -1.37 | 1.79E-01 | 7.34E-01 |
| <b>TSC22D2</b>      | -0.26 | 2.44E-01 | 1.00E+00 | 0.43  | 1.80E-01 | 7.34E-01 |
| <b>JRK</b>          | 0.33  | 4.90E-01 | 1.00E+00 | 0.54  | 1.80E-01 | 7.34E-01 |
| <b>RRP8</b>         | -0.20 | 4.32E-01 | 1.00E+00 | -0.22 | 1.80E-01 | 7.34E-01 |
| <b>SLC25A16</b>     | 0.27  | 5.07E-01 | 1.00E+00 | -0.56 | 1.80E-01 | 7.34E-01 |
| <b>UFSP2</b>        | 0.12  | 5.82E-01 | 1.00E+00 | -0.35 | 1.80E-01 | 7.34E-01 |
| <b>NCK1-DT</b>      | -0.29 | 5.42E-01 | 1.00E+00 | -0.61 | 1.80E-01 | 7.34E-01 |
| <b>AC007613.1</b>   | -0.25 | 8.93E-01 | 1.00E+00 | -1.35 | 1.80E-01 | 7.34E-01 |
| <b>XLOC_010031</b>  | -0.92 | 7.64E-01 | 1.00E+00 | -1.48 | 1.80E-01 | 7.34E-01 |
| <b>ZMYM6</b>        | 0.41  | 1.62E-01 | 1.00E+00 | -0.36 | 1.80E-01 | 7.34E-01 |
| <b>C18orf25</b>     | -0.03 | 9.05E-01 | 1.00E+00 | 0.32  | 1.80E-01 | 7.34E-01 |
| <b>LDHA</b>         | -0.04 | 8.27E-01 | 1.00E+00 | -0.27 | 1.80E-01 | 7.34E-01 |
| <b>DPYSL3</b>       | 0.36  | 3.34E-01 | 1.00E+00 | 0.75  | 1.80E-01 | 7.34E-01 |
| <b>LINC01089</b>    | -0.07 | 9.26E-01 | 1.00E+00 | -0.54 | 1.80E-01 | 7.34E-01 |
| <b>VDAC1</b>        | -0.13 | 3.71E-01 | 1.00E+00 | -0.18 | 1.80E-01 | 7.34E-01 |
| <b>ELFN2</b>        | -1.19 | 2.48E-01 | 1.00E+00 | 1.48  | 1.80E-01 | 7.34E-01 |
| <b>TWIST1</b>       | 0.01  | 9.67E-01 | 1.00E+00 | 0.84  | 1.80E-01 | 7.34E-01 |
| <b>MBOAT1</b>       | 0.52  | 3.27E-01 | 1.00E+00 | 1.08  | 1.80E-01 | 7.34E-01 |
| <b>DISC1FP1</b>     | -2.61 | 3.48E-01 | 1.00E+00 | -1.93 | 1.80E-01 | 7.34E-01 |
| <b>INPP1</b>        | 0.18  | 5.23E-01 | 1.00E+00 | -0.42 | 1.80E-01 | 7.34E-01 |
| <b>DLST</b>         | 0.17  | 4.07E-01 | 1.00E+00 | 0.76  | 1.80E-01 | 7.34E-01 |
| <b>AC087289.5</b>   | 0.76  | 6.21E-01 | 1.00E+00 | -1.57 | 1.80E-01 | 7.34E-01 |
| <b>GSKIP</b>        | 0.30  | 4.38E-01 | 1.00E+00 | -0.52 | 1.80E-01 | 7.35E-01 |
| <b>SLC12A9-AS1</b>  | -0.86 | 3.77E-01 | 1.00E+00 | -0.71 | 1.80E-01 | 7.35E-01 |
| <b>AP4B1</b>        | 0.10  | 7.49E-01 | 1.00E+00 | -0.28 | 1.80E-01 | 7.35E-01 |
| <b>HIST2H2AB</b>    | -2.30 | 4.98E-01 | 1.00E+00 | 1.82  | 1.80E-01 | 7.35E-01 |
| <b>ZCCHC14</b>      | -0.24 | 3.94E-01 | 1.00E+00 | 0.63  | 1.80E-01 | 7.35E-01 |
| <b>AC010616.1</b>   | -0.37 | 7.71E-01 | 1.00E+00 | 2.00  | 1.80E-01 | 7.35E-01 |
| <b>JUN</b>          | -1.21 | 3.79E-02 | 1.00E+00 | 0.70  | 1.80E-01 | 7.35E-01 |

|                     |       |          |          |       |          |          |
|---------------------|-------|----------|----------|-------|----------|----------|
| <b>NMD3P1</b>       | 0.36  | 7.29E-01 | 1.00E+00 | 1.47  | 1.81E-01 | 7.35E-01 |
| <b>OXNAD1</b>       | 0.11  | 6.28E-01 | 1.00E+00 | -0.27 | 1.81E-01 | 7.35E-01 |
| <b>SNRPGP15</b>     | -1.84 | 2.25E-01 | 1.00E+00 | -0.54 | 1.81E-01 | 7.35E-01 |
| <b>AC095057.3</b>   | -0.83 | 4.72E-01 | 1.00E+00 | -1.21 | 1.81E-01 | 7.35E-01 |
| <b>XLOC_014397</b>  | -0.80 | 5.03E-01 | 1.00E+00 | 1.35  | 1.81E-01 | 7.35E-01 |
| <b>NBPF12</b>       | 0.41  | 2.98E-01 | 1.00E+00 | 0.54  | 1.81E-01 | 7.36E-01 |
| <b>ATP11C</b>       | 0.13  | 5.62E-01 | 1.00E+00 | 0.62  | 1.81E-01 | 7.36E-01 |
| <b>AL109766.1</b>   | 0.55  | 8.46E-01 | 1.00E+00 | -1.05 | 1.81E-01 | 7.36E-01 |
| <b>SLC29A4</b>      | 2.00  | 1.07E-01 | 1.00E+00 | -1.04 | 1.81E-01 | 7.36E-01 |
| <b>EPC1</b>         | -0.05 | 7.87E-01 | 1.00E+00 | 0.27  | 1.81E-01 | 7.36E-01 |
| <b>UBL5</b>         | 0.11  | 4.54E-01 | 1.00E+00 | -0.37 | 1.81E-01 | 7.36E-01 |
| <b>BTBD6</b>        | 0.08  | 6.86E-01 | 1.00E+00 | -0.68 | 1.81E-01 | 7.36E-01 |
| <b>EVA1C</b>        | -0.19 | 5.37E-01 | 1.00E+00 | -0.29 | 1.81E-01 | 7.36E-01 |
| <b>SDHB</b>         | -0.06 | 7.31E-01 | 1.00E+00 | -0.36 | 1.81E-01 | 7.36E-01 |
| <b>AURKC</b>        | -0.05 | 9.28E-01 | 1.00E+00 | 0.97  | 1.81E-01 | 7.36E-01 |
| <b>AC005498.2</b>   | -1.61 | 3.02E-01 | 1.00E+00 | -0.90 | 1.81E-01 | 7.36E-01 |
| <b>MT2A</b>         | -0.66 | 1.81E-01 | 1.00E+00 | 0.52  | 1.81E-01 | 7.36E-01 |
| <b>AL121894.2</b>   | 1.33  | 1.41E-01 | 1.00E+00 | 1.36  | 1.81E-01 | 7.36E-01 |
| <b>IYD</b>          | -1.71 | 2.50E-01 | 1.00E+00 | -1.65 | 1.81E-01 | 7.36E-01 |
| <b>LRRC34</b>       | 0.84  | 2.89E-01 | 1.00E+00 | -0.69 | 1.81E-01 | 7.36E-01 |
| <b>ATP5F1EP2</b>    | NA    | NA       | NA       | -0.80 | 1.81E-01 | 7.36E-01 |
| <b>MDH1B</b>        | -0.39 | 5.27E-01 | 1.00E+00 | -1.07 | 1.81E-01 | 7.36E-01 |
| <b>TMEM199</b>      | 0.02  | 9.24E-01 | 1.00E+00 | -0.30 | 1.81E-01 | 7.36E-01 |
| <b>SPATS2</b>       | -0.13 | 5.99E-01 | 1.00E+00 | -0.35 | 1.81E-01 | 7.36E-01 |
| <b>ZNF8</b>         | 0.16  | 7.38E-01 | 1.00E+00 | 0.49  | 1.81E-01 | 7.36E-01 |
| <b>NT5C3AP1</b>     | -0.58 | 8.67E-01 | 1.00E+00 | 0.97  | 1.81E-01 | 7.36E-01 |
| <b>RP11-397O4.1</b> | -0.56 | 8.73E-01 | 1.00E+00 | 4.21  | 1.81E-01 | 7.36E-01 |
| <b>ZBTB42</b>       | -0.02 | 9.50E-01 | 1.00E+00 | 0.81  | 1.81E-01 | 7.36E-01 |
| <b>LINC01562</b>    | 0.13  | 9.71E-01 | 1.00E+00 | 1.90  | 1.82E-01 | 7.36E-01 |
| <b>AC064807.1</b>   | -0.42 | 2.27E-01 | 1.00E+00 | -0.34 | 1.82E-01 | 7.36E-01 |
| <b>AC099789.1</b>   | NA    | NA       | NA       | -1.24 | 1.82E-01 | 7.36E-01 |
| <b>OLFM2</b>        | -0.17 | 5.39E-01 | 1.00E+00 | -0.53 | 1.82E-01 | 7.36E-01 |

|                    |       |          |          |       |          |          |
|--------------------|-------|----------|----------|-------|----------|----------|
| <b>GALNT6</b>      | -1.49 | 2.20E-03 | 2.39E-01 | 0.80  | 1.82E-01 | 7.36E-01 |
| <b>AC020915.1</b>  | -1.35 | 2.63E-01 | 1.00E+00 | 1.19  | 1.82E-01 | 7.36E-01 |
| <b>FARP1</b>       | -0.20 | 6.31E-01 | 1.00E+00 | 0.64  | 1.82E-01 | 7.36E-01 |
| <b>ZNF543</b>      | -0.23 | 4.90E-01 | 1.00E+00 | -0.33 | 1.82E-01 | 7.36E-01 |
| <b>LETM2</b>       | 0.24  | 6.27E-01 | 1.00E+00 | 0.64  | 1.82E-01 | 7.36E-01 |
| <b>AC058791.1</b>  | 0.16  | 8.80E-01 | 1.00E+00 | 0.82  | 1.82E-01 | 7.36E-01 |
| <b>NLRP12</b>      | -0.43 | 6.73E-01 | 1.00E+00 | 1.81  | 1.82E-01 | 7.36E-01 |
| <b>AC130895.1</b>  | 1.68  | 6.26E-01 | 1.00E+00 | -1.17 | 1.82E-01 | 7.36E-01 |
| <b>FBN1</b>        | 0.24  | 6.72E-01 | 1.00E+00 | 0.81  | 1.82E-01 | 7.36E-01 |
| <b>AL359764.1</b>  | -1.48 | 2.88E-01 | 1.00E+00 | -2.32 | 1.82E-01 | 7.36E-01 |
| <b>NEMP2</b>       | 0.47  | 8.36E-02 | 1.00E+00 | 0.47  | 1.82E-01 | 7.36E-01 |
| <b>AC069209.1</b>  | -0.68 | 4.93E-01 | 1.00E+00 | -1.30 | 1.82E-01 | 7.37E-01 |
| <b>GPR150</b>      | 0.33  | 6.34E-01 | 1.00E+00 | 1.30  | 1.82E-01 | 7.37E-01 |
| <b>CDC26</b>       | 0.28  | 2.88E-01 | 1.00E+00 | -0.48 | 1.82E-01 | 7.37E-01 |
| <b>TCF25</b>       | -0.05 | 7.66E-01 | 1.00E+00 | 0.21  | 1.82E-01 | 7.37E-01 |
| <b>AC083798.2</b>  | -0.47 | 2.71E-01 | 1.00E+00 | -0.66 | 1.82E-01 | 7.37E-01 |
| <b>XLOC_013952</b> | -0.21 | 8.36E-01 | 1.00E+00 | 1.21  | 1.82E-01 | 7.37E-01 |
| <b>RGMA</b>        | -0.19 | 7.10E-01 | 1.00E+00 | 0.75  | 1.82E-01 | 7.37E-01 |
| <b>PLXDC2</b>      | -0.23 | 4.28E-01 | 1.00E+00 | 0.32  | 1.82E-01 | 7.37E-01 |
| <b>TPT1P4</b>      | 0.65  | 6.49E-01 | 1.00E+00 | -0.76 | 1.82E-01 | 7.37E-01 |
| <b>BATF</b>        | -0.33 | 5.39E-01 | 1.00E+00 | 1.11  | 1.83E-01 | 7.37E-01 |
| <b>AF131216.4</b>  | -2.39 | 3.82E-01 | 1.00E+00 | 1.70  | 1.83E-01 | 7.37E-01 |
| <b>NOS2</b>        | 0.41  | 6.44E-01 | 1.00E+00 | -1.48 | 1.83E-01 | 7.37E-01 |
| <b>MRPL48</b>      | -0.04 | 8.16E-01 | 1.00E+00 | -0.30 | 1.83E-01 | 7.37E-01 |
| <b>XLOC_013591</b> | -0.39 | 8.29E-01 | 1.00E+00 | 1.38  | 1.83E-01 | 7.37E-01 |
| <b>EMC10</b>       | -0.23 | 2.72E-01 | 1.00E+00 | 0.63  | 1.83E-01 | 7.37E-01 |
| <b>HECW2</b>       | -0.30 | 5.27E-01 | 1.00E+00 | 0.72  | 1.83E-01 | 7.37E-01 |
| <b>TIMM9</b>       | 0.21  | 2.53E-01 | 1.00E+00 | -0.33 | 1.83E-01 | 7.37E-01 |
| <b>TMEM59</b>      | 0.17  | 3.26E-01 | 1.00E+00 | -0.43 | 1.83E-01 | 7.37E-01 |
| <b>LINC00517</b>   | -1.04 | 2.56E-01 | 1.00E+00 | 1.23  | 1.83E-01 | 7.37E-01 |
| <b>AC010148.1</b>  | -2.45 | 2.30E-01 | 1.00E+00 | 1.23  | 1.83E-01 | 7.37E-01 |
| <b>AP003119.2</b>  | -0.55 | 4.01E-01 | 1.00E+00 | -0.94 | 1.83E-01 | 7.37E-01 |

|             |       |          |          |       |          |          |
|-------------|-------|----------|----------|-------|----------|----------|
| LINC01788   | NA    | NA       | NA       | 2.41  | 1.83E-01 | 7.37E-01 |
| ISCU        | 0.05  | 8.25E-01 | 1.00E+00 | -0.39 | 1.83E-01 | 7.37E-01 |
| XLOC_011112 | 3.97  | 3.98E-02 | 1.00E+00 | -1.76 | 1.83E-01 | 7.37E-01 |
| AL096816.1  | -0.50 | 8.46E-01 | 1.00E+00 | 2.04  | 1.83E-01 | 7.37E-01 |
| GNG2        | 0.55  | 2.61E-01 | 1.00E+00 | -0.62 | 1.83E-01 | 7.37E-01 |
| C22orf46    | -0.22 | 4.57E-01 | 1.00E+00 | 0.68  | 1.83E-01 | 7.37E-01 |
| LINC00643   | 1.07  | 6.29E-01 | 1.00E+00 | -1.94 | 1.83E-01 | 7.37E-01 |
| TRABD       | -0.17 | 4.78E-01 | 1.00E+00 | 0.67  | 1.83E-01 | 7.37E-01 |
| FAM86HP     | 0.11  | 8.34E-01 | 1.00E+00 | -0.70 | 1.83E-01 | 7.37E-01 |
| AC118553.2  | -1.19 | 7.30E-01 | 1.00E+00 | 0.97  | 1.83E-01 | 7.37E-01 |
| RPS7P14     | NA    | NA       | NA       | -1.17 | 1.83E-01 | 7.37E-01 |
| Z93930.2    | -0.05 | 9.10E-01 | 1.00E+00 | -0.60 | 1.83E-01 | 7.37E-01 |
| STXBP4      | -0.14 | 6.50E-01 | 1.00E+00 | -0.53 | 1.83E-01 | 7.37E-01 |
| TERF2IP     | 0.13  | 4.04E-01 | 1.00E+00 | -0.62 | 1.83E-01 | 7.37E-01 |
| AC083841.1  | 0.54  | 6.89E-01 | 1.00E+00 | 0.93  | 1.83E-01 | 7.37E-01 |
| MAP4K4      | -0.07 | 7.85E-01 | 1.00E+00 | 0.70  | 1.83E-01 | 7.37E-01 |
| PIK3IP1-AS1 | -0.36 | 8.98E-01 | 1.00E+00 | -1.23 | 1.84E-01 | 7.37E-01 |
| ING2        | -0.53 | 4.44E-02 | 1.00E+00 | -0.35 | 1.84E-01 | 7.37E-01 |
| ITPRID1     | -0.04 | 9.63E-01 | 1.00E+00 | -1.02 | 1.84E-01 | 7.37E-01 |
| AL162430.1  | -2.01 | 5.20E-01 | 1.00E+00 | -0.96 | 1.84E-01 | 7.37E-01 |
| PRUNE1      | 0.36  | 7.72E-02 | 1.00E+00 | -0.38 | 1.84E-01 | 7.37E-01 |
| FSCN1       | -0.87 | 2.82E-04 | 6.27E-02 | 0.78  | 1.84E-01 | 7.37E-01 |
| NOL11       | -0.05 | 8.39E-01 | 1.00E+00 | -0.21 | 1.84E-01 | 7.38E-01 |
| RAD51C      | 0.11  | 6.77E-01 | 1.00E+00 | -0.45 | 1.84E-01 | 7.38E-01 |
| IGFBP3      | 1.02  | 6.39E-03 | 4.79E-01 | 0.56  | 1.84E-01 | 7.38E-01 |
| AWAT1       | 0.37  | 8.33E-01 | 1.00E+00 | -1.60 | 1.84E-01 | 7.38E-01 |
| DIAPH2      | -0.17 | 4.26E-01 | 1.00E+00 | -0.36 | 1.84E-01 | 7.38E-01 |
| ALDH3A2     | 0.27  | 3.25E-01 | 1.00E+00 | -0.39 | 1.84E-01 | 7.38E-01 |
| RHOBTB2     | 0.34  | 4.26E-01 | 1.00E+00 | 0.79  | 1.84E-01 | 7.38E-01 |
| C10orf143   | -0.22 | 4.70E-01 | 1.00E+00 | -0.33 | 1.84E-01 | 7.38E-01 |
| VSTM2A      | -0.72 | 5.00E-01 | 1.00E+00 | 1.50  | 1.84E-01 | 7.38E-01 |
| EI24P2      | NA    | NA       | NA       | -1.13 | 1.84E-01 | 7.38E-01 |

|                    |       |          |          |       |          |          |
|--------------------|-------|----------|----------|-------|----------|----------|
| <b>ADAM33</b>      | 0.32  | 4.21E-01 | 1.00E+00 | 0.81  | 1.84E-01 | 7.39E-01 |
| <b>CCDC80</b>      | 0.71  | 2.82E-01 | 1.00E+00 | 0.71  | 1.84E-01 | 7.39E-01 |
| <b>SLC35F6</b>     | -0.03 | 9.07E-01 | 1.00E+00 | 0.44  | 1.84E-01 | 7.39E-01 |
| <b>PPP2R2A</b>     | 0.04  | 8.43E-01 | 1.00E+00 | 0.30  | 1.84E-01 | 7.39E-01 |
| <b>AKTIP</b>       | 0.10  | 6.69E-01 | 1.00E+00 | -0.33 | 1.84E-01 | 7.39E-01 |
| <b>RCAN3</b>       | 0.12  | 7.07E-01 | 1.00E+00 | -0.36 | 1.84E-01 | 7.39E-01 |
| <b>XPOTP1</b>      | -0.80 | 7.72E-01 | 1.00E+00 | -1.43 | 1.84E-01 | 7.39E-01 |
| <b>PEX2</b>        | 0.34  | 4.50E-02 | 1.00E+00 | -0.39 | 1.84E-01 | 7.39E-01 |
| <b>TMEM183A</b>    | 0.02  | 9.16E-01 | 1.00E+00 | -0.43 | 1.84E-01 | 7.39E-01 |
| <b>AC114980.1</b>  | 0.16  | 8.25E-01 | 1.00E+00 | 1.05  | 1.85E-01 | 7.39E-01 |
| <b>CCDC26</b>      | -1.96 | 3.05E-01 | 1.00E+00 | -0.77 | 1.85E-01 | 7.39E-01 |
| <b>CABLES1</b>     | 0.47  | 4.64E-02 | 1.00E+00 | -0.57 | 1.85E-01 | 7.39E-01 |
| <b>XLOC_000633</b> | 1.51  | 6.60E-01 | 1.00E+00 | -1.93 | 1.85E-01 | 7.39E-01 |
| <b>CYR61</b>       | -1.04 | 1.07E-04 | 2.56E-02 | 0.64  | 1.85E-01 | 7.39E-01 |
| <b>PCDHB14</b>     | -0.25 | 3.93E-01 | 1.00E+00 | -0.64 | 1.85E-01 | 7.39E-01 |
| <b>AL031282.2</b>  | 0.05  | 9.62E-01 | 1.00E+00 | -0.69 | 1.85E-01 | 7.39E-01 |
| <b>ZKSCAN2-DT</b>  | 0.53  | 7.62E-01 | 1.00E+00 | 1.70  | 1.85E-01 | 7.39E-01 |
| <b>SRFBP1</b>      | -0.25 | 2.36E-01 | 1.00E+00 | -0.34 | 1.85E-01 | 7.39E-01 |
| <b>FOXP2</b>       | 0.32  | 3.28E-01 | 1.00E+00 | -0.49 | 1.85E-01 | 7.39E-01 |
| <b>ECI1</b>        | -0.14 | 6.13E-01 | 1.00E+00 | -0.85 | 1.85E-01 | 7.39E-01 |
| <b>UPF3A</b>       | 0.06  | 7.79E-01 | 1.00E+00 | 0.32  | 1.85E-01 | 7.39E-01 |
| <b>AL136141.1</b>  | 2.44  | 2.98E-01 | 1.00E+00 | -1.61 | 1.85E-01 | 7.39E-01 |
| <b>NTS</b>         | -0.48 | 8.57E-01 | 1.00E+00 | 1.12  | 1.85E-01 | 7.39E-01 |
| <b>YEATS2</b>      | 0.23  | 5.38E-01 | 1.00E+00 | 0.67  | 1.85E-01 | 7.39E-01 |
| <b>GPR149</b>      | -3.86 | 2.30E-02 | 9.12E-01 | 1.94  | 1.85E-01 | 7.39E-01 |
| <b>NUCB1</b>       | 0.01  | 9.77E-01 | 1.00E+00 | 0.46  | 1.85E-01 | 7.39E-01 |
| <b>RAPGEF4</b>     | -0.03 | 9.31E-01 | 1.00E+00 | 0.36  | 1.85E-01 | 7.39E-01 |
| <b>TSC22D1-AS1</b> | -0.67 | 5.77E-01 | 1.00E+00 | 1.33  | 1.85E-01 | 7.39E-01 |
| <b>BTBD10</b>      | 0.22  | 3.80E-01 | 1.00E+00 | 0.22  | 1.85E-01 | 7.39E-01 |
| <b>OGFR-AS1</b>    | -1.00 | 6.27E-01 | 1.00E+00 | 1.68  | 1.85E-01 | 7.39E-01 |
| <b>XLOC_014080</b> | -0.24 | 7.87E-01 | 1.00E+00 | 1.12  | 1.85E-01 | 7.39E-01 |
| <b>FCGRT</b>       | 0.28  | 3.15E-01 | 1.00E+00 | 0.39  | 1.85E-01 | 7.39E-01 |

|                   |       |          |          |       |          |          |
|-------------------|-------|----------|----------|-------|----------|----------|
| <b>GOT1</b>       | 0.04  | 8.85E-01 | 1.00E+00 | -0.24 | 1.85E-01 | 7.39E-01 |
| <b>LINC00612</b>  | -0.03 | 9.77E-01 | 1.00E+00 | 1.14  | 1.85E-01 | 7.39E-01 |
| <b>AC018904.1</b> | 0.19  | 8.51E-01 | 1.00E+00 | 1.13  | 1.86E-01 | 7.39E-01 |
| <b>SOX30</b>      | 2.32  | 4.96E-02 | 1.00E+00 | 1.44  | 1.86E-01 | 7.39E-01 |
| <b>G3BP2</b>      | -0.06 | 7.71E-01 | 1.00E+00 | -0.32 | 1.86E-01 | 7.39E-01 |
| <b>MBD3</b>       | -0.16 | 4.78E-01 | 1.00E+00 | 0.55  | 1.86E-01 | 7.39E-01 |
| <b>MXRA8</b>      | 0.23  | 5.86E-01 | 1.00E+00 | 0.83  | 1.86E-01 | 7.39E-01 |
| <b>KRT18P7</b>    | -0.52 | 8.80E-01 | 1.00E+00 | -2.03 | 1.86E-01 | 7.40E-01 |
| <b>TMEM135</b>    | 0.56  | 3.11E-01 | 1.00E+00 | -0.84 | 1.86E-01 | 7.40E-01 |
| <b>GPI</b>        | -0.07 | 7.93E-01 | 1.00E+00 | -0.21 | 1.86E-01 | 7.40E-01 |
| <b>TTN-AS1</b>    | -0.32 | 6.49E-01 | 1.00E+00 | 0.49  | 1.86E-01 | 7.40E-01 |
| <b>PDE1C</b>      | 0.34  | 7.36E-01 | 1.00E+00 | 1.18  | 1.86E-01 | 7.40E-01 |
| <b>DLEU2</b>      | 0.03  | 9.55E-01 | 1.00E+00 | -0.55 | 1.86E-01 | 7.40E-01 |
| <b>LINC01537</b>  | 0.45  | 5.50E-01 | 1.00E+00 | 1.13  | 1.86E-01 | 7.40E-01 |
| <b>BST1</b>       | 0.48  | 1.56E-01 | 1.00E+00 | 0.43  | 1.86E-01 | 7.40E-01 |
| <b>TMEM105</b>    | -0.13 | 8.94E-01 | 1.00E+00 | 0.98  | 1.86E-01 | 7.40E-01 |
| <b>AL645608.1</b> | -3.22 | 3.41E-01 | 1.00E+00 | 1.80  | 1.86E-01 | 7.40E-01 |
| <b>ABCA2</b>      | -0.27 | 4.22E-01 | 1.00E+00 | 0.77  | 1.86E-01 | 7.40E-01 |
| <b>KDM6B</b>      | -0.49 | 5.74E-02 | 1.00E+00 | 0.84  | 1.86E-01 | 7.40E-01 |
| <b>TTC34</b>      | -0.50 | 6.24E-01 | 1.00E+00 | 1.88  | 1.86E-01 | 7.40E-01 |
| <b>UNG</b>        | 0.10  | 6.66E-01 | 1.00E+00 | -0.31 | 1.86E-01 | 7.40E-01 |
| <b>OXLD1</b>      | -0.08 | 7.41E-01 | 1.00E+00 | -0.33 | 1.86E-01 | 7.40E-01 |
| <b>TRGV3</b>      | 0.67  | 7.97E-01 | 1.00E+00 | 1.16  | 1.86E-01 | 7.40E-01 |
| <b>ZBTB24</b>     | -0.21 | 4.62E-01 | 1.00E+00 | -0.45 | 1.86E-01 | 7.40E-01 |
| <b>RPA2</b>       | -0.09 | 7.37E-01 | 1.00E+00 | -0.40 | 1.86E-01 | 7.40E-01 |
| <b>IL18R1</b>     | 0.04  | 9.35E-01 | 1.00E+00 | 0.49  | 1.86E-01 | 7.40E-01 |
| <b>C16orf87</b>   | 0.08  | 7.69E-01 | 1.00E+00 | -0.36 | 1.86E-01 | 7.40E-01 |
| <b>LINC01389</b>  | -0.95 | 6.14E-01 | 1.00E+00 | -1.58 | 1.86E-01 | 7.40E-01 |
| <b>G38630</b>     | -0.35 | 8.16E-01 | 1.00E+00 | -1.81 | 1.86E-01 | 7.40E-01 |
| <b>DTD1</b>       | 0.06  | 7.59E-01 | 1.00E+00 | -0.35 | 1.87E-01 | 7.41E-01 |
| <b>ZNF487</b>     | -0.33 | 2.89E-01 | 1.00E+00 | -0.45 | 1.87E-01 | 7.41E-01 |
| <b>WNT16</b>      | 0.10  | 8.16E-01 | 1.00E+00 | -0.97 | 1.87E-01 | 7.41E-01 |

|             |       |          |          |       |          |          |
|-------------|-------|----------|----------|-------|----------|----------|
| EPG5        | 0.16  | 5.38E-01 | 1.00E+00 | 0.63  | 1.87E-01 | 7.41E-01 |
| MIR583HG    | 2.12  | 1.95E-01 | 1.00E+00 | -1.62 | 1.87E-01 | 7.41E-01 |
| PTP4A2      | 0.23  | 3.95E-01 | 1.00E+00 | -0.48 | 1.87E-01 | 7.41E-01 |
| SVEP1       | 1.07  | 4.52E-02 | 1.00E+00 | 0.82  | 1.87E-01 | 7.41E-01 |
| AC079414.3  | 0.35  | 6.11E-01 | 1.00E+00 | -0.73 | 1.87E-01 | 7.41E-01 |
| CPT1A       | 0.03  | 9.28E-01 | 1.00E+00 | 0.86  | 1.87E-01 | 7.41E-01 |
| G34382      | -0.22 | 8.68E-01 | 1.00E+00 | -1.26 | 1.87E-01 | 7.41E-01 |
| PELO        | -0.25 | 1.32E-01 | 1.00E+00 | 0.20  | 1.87E-01 | 7.41E-01 |
| NKAPP1      | -0.09 | 8.12E-01 | 1.00E+00 | -0.36 | 1.87E-01 | 7.41E-01 |
| AC012186.3  | 0.56  | 8.71E-01 | 1.00E+00 | 2.37  | 1.87E-01 | 7.41E-01 |
| PSRC1       | -0.01 | 9.74E-01 | 1.00E+00 | 0.60  | 1.87E-01 | 7.41E-01 |
| TIMM50      | -0.20 | 2.62E-01 | 1.00E+00 | 0.17  | 1.87E-01 | 7.41E-01 |
| GJB1        | -1.07 | 9.47E-02 | 1.00E+00 | -0.84 | 1.87E-01 | 7.41E-01 |
| HSF1        | -0.16 | 4.93E-01 | 1.00E+00 | 0.45  | 1.87E-01 | 7.41E-01 |
| G32232      | -3.30 | 1.13E-01 | 1.00E+00 | -1.38 | 1.87E-01 | 7.41E-01 |
| GTF2IP4     | -0.10 | 7.65E-01 | 1.00E+00 | -0.50 | 1.87E-01 | 7.41E-01 |
| MAN2B1      | -0.47 | 3.19E-02 | 1.00E+00 | 0.71  | 1.87E-01 | 7.41E-01 |
| HEATR6      | 0.27  | 2.38E-01 | 1.00E+00 | 0.41  | 1.87E-01 | 7.41E-01 |
| TUB         | 0.35  | 5.21E-01 | 1.00E+00 | 0.79  | 1.87E-01 | 7.41E-01 |
| IFIT5       | 0.18  | 7.48E-01 | 1.00E+00 | 0.45  | 1.87E-01 | 7.41E-01 |
| HSD11B2     | -1.21 | 2.51E-02 | 9.28E-01 | -0.76 | 1.87E-01 | 7.41E-01 |
| ATG13       | 0.06  | 7.76E-01 | 1.00E+00 | 0.27  | 1.87E-01 | 7.41E-01 |
| POM121L9P   | -0.57 | 4.51E-01 | 1.00E+00 | 1.22  | 1.87E-01 | 7.41E-01 |
| APMAP       | 0.34  | 4.17E-01 | 1.00E+00 | -0.46 | 1.87E-01 | 7.41E-01 |
| HSPE1       | -0.01 | 9.74E-01 | 1.00E+00 | -0.69 | 1.88E-01 | 7.41E-01 |
| XLOC_007718 | 0.65  | 7.39E-01 | 1.00E+00 | -1.29 | 1.88E-01 | 7.41E-01 |
| AC092376.1  | -0.12 | 9.73E-01 | 1.00E+00 | 1.60  | 1.88E-01 | 7.41E-01 |
| HIST1H4I    | 0.21  | 7.21E-01 | 1.00E+00 | -0.35 | 1.88E-01 | 7.41E-01 |
| ACER2       | 0.34  | 4.65E-01 | 1.00E+00 | 0.93  | 1.88E-01 | 7.41E-01 |
| RPS6KB2     | -0.08 | 8.39E-01 | 1.00E+00 | 0.43  | 1.88E-01 | 7.41E-01 |
| ARF1        | 0.00  | 9.95E-01 | 1.00E+00 | 0.15  | 1.88E-01 | 7.41E-01 |
| SLAIN2      | -0.14 | 6.24E-01 | 1.00E+00 | -0.33 | 1.88E-01 | 7.41E-01 |

|                    |       |          |          |       |          |          |
|--------------------|-------|----------|----------|-------|----------|----------|
| <b>AL513304.1</b>  | -0.12 | 9.73E-01 | 1.00E+00 | 2.52  | 1.88E-01 | 7.41E-01 |
| <b>RLIM</b>        | 0.00  | 9.92E-01 | 1.00E+00 | 0.28  | 1.88E-01 | 7.41E-01 |
| <b>G31356</b>      | -1.37 | 3.02E-01 | 1.00E+00 | -0.89 | 1.88E-01 | 7.42E-01 |
| <b>XAGE3</b>       | NA    | NA       | NA       | -2.57 | 1.88E-01 | 7.42E-01 |
| <b>AL137784.1</b>  | 0.65  | 3.50E-01 | 1.00E+00 | -0.89 | 1.88E-01 | 7.42E-01 |
| <b>IGHV4-39</b>    | 7.65  | 4.27E-06 | 1.39E-03 | 4.14  | 1.88E-01 | 7.42E-01 |
| <b>MAGEE2</b>      | -0.54 | 6.31E-01 | 1.00E+00 | 1.80  | 1.88E-01 | 7.42E-01 |
| <b>WTAP</b>        | -0.04 | 8.34E-01 | 1.00E+00 | 0.25  | 1.88E-01 | 7.42E-01 |
| <b>EFCAB7</b>      | -0.31 | 3.22E-01 | 1.00E+00 | -0.51 | 1.88E-01 | 7.42E-01 |
| <b>XLOC_005571</b> | 0.31  | 6.65E-01 | 1.00E+00 | 1.48  | 1.88E-01 | 7.42E-01 |
| <b>AC019205.1</b>  | -0.56 | 1.72E-01 | 1.00E+00 | -0.41 | 1.88E-01 | 7.42E-01 |
| <b>AC013565.1</b>  | -3.16 | 3.09E-02 | 1.00E+00 | -1.23 | 1.88E-01 | 7.42E-01 |
| <b>TMEM191A</b>    | -0.10 | 7.27E-01 | 1.00E+00 | 0.42  | 1.88E-01 | 7.42E-01 |
| <b>PRCC</b>        | -0.31 | 1.66E-01 | 1.00E+00 | 0.27  | 1.88E-01 | 7.42E-01 |
| <b>NDUFA4</b>      | 0.02  | 9.35E-01 | 1.00E+00 | -0.49 | 1.88E-01 | 7.42E-01 |
| <b>FRAS1</b>       | -0.45 | 4.30E-01 | 1.00E+00 | 1.04  | 1.89E-01 | 7.42E-01 |
| <b>EP400P1</b>     | -0.63 | 1.70E-01 | 1.00E+00 | 0.46  | 1.89E-01 | 7.42E-01 |
| <b>G38642</b>      | 4.62  | 2.34E-02 | 9.15E-01 | -1.65 | 1.89E-01 | 7.42E-01 |
| <b>ARSI</b>        | -0.40 | 3.65E-01 | 1.00E+00 | 0.92  | 1.89E-01 | 7.42E-01 |
| <b>SYVN1</b>       | -0.07 | 7.48E-01 | 1.00E+00 | 0.54  | 1.89E-01 | 7.42E-01 |
| <b>KHK</b>         | 0.11  | 6.21E-01 | 1.00E+00 | -0.40 | 1.89E-01 | 7.42E-01 |
| <b>HS3ST2</b>      | 0.49  | 4.08E-01 | 1.00E+00 | 1.10  | 1.89E-01 | 7.42E-01 |
| <b>RNF144A-AS1</b> | -3.28 | 1.26E-02 | 7.01E-01 | 1.32  | 1.89E-01 | 7.43E-01 |
| <b>NMT2</b>        | 0.55  | 7.45E-02 | 1.00E+00 | -0.51 | 1.89E-01 | 7.43E-01 |
| <b>HIST2H4A</b>    | -1.35 | 1.88E-01 | 1.00E+00 | -0.78 | 1.89E-01 | 7.43E-01 |
| <b>CYP7A1</b>      | 0.48  | 8.88E-01 | 1.00E+00 | -2.29 | 1.89E-01 | 7.43E-01 |
| <b>GFER</b>        | 0.07  | 8.04E-01 | 1.00E+00 | 0.63  | 1.89E-01 | 7.44E-01 |
| <b>RPL29</b>       | -0.28 | 3.52E-01 | 1.00E+00 | 0.38  | 1.89E-01 | 7.44E-01 |
| <b>AL137026.1</b>  | -2.29 | 3.84E-01 | 1.00E+00 | -1.16 | 1.89E-01 | 7.44E-01 |
| <b>AL513165.1</b>  | -0.24 | 6.80E-01 | 1.00E+00 | 0.99  | 1.89E-01 | 7.44E-01 |
| <b>AC234781.1</b>  | 0.70  | 5.28E-01 | 1.00E+00 | 0.77  | 1.89E-01 | 7.44E-01 |
| <b>TNFRSF1B</b>    | 0.28  | 4.56E-01 | 1.00E+00 | 0.92  | 1.90E-01 | 7.44E-01 |



|             |       |          |          |       |          |          |
|-------------|-------|----------|----------|-------|----------|----------|
| ZHX2        | 0.18  | 5.28E-01 | 1.00E+00 | 0.34  | 1.90E-01 | 7.44E-01 |
| CEP350      | -0.25 | 3.40E-01 | 1.00E+00 | -0.36 | 1.90E-01 | 7.44E-01 |
| AL009174.1  | -0.80 | 4.04E-01 | 1.00E+00 | -0.77 | 1.90E-01 | 7.45E-01 |
| ZNF668      | -0.23 | 4.07E-01 | 1.00E+00 | 0.53  | 1.90E-01 | 7.45E-01 |
| AREL1       | 0.05  | 8.19E-01 | 1.00E+00 | 0.51  | 1.90E-01 | 7.45E-01 |
| LPCAT1      | -0.15 | 6.45E-01 | 1.00E+00 | 0.88  | 1.90E-01 | 7.45E-01 |
| AL133163.1  | 1.19  | 5.71E-01 | 1.00E+00 | -1.66 | 1.90E-01 | 7.45E-01 |
| GPAM        | 3.96  | 5.64E-03 | 4.46E-01 | -1.00 | 1.90E-01 | 7.45E-01 |
| SCML1       | 0.07  | 8.87E-01 | 1.00E+00 | -0.42 | 1.90E-01 | 7.45E-01 |
| AC016866.1  | -0.53 | 5.31E-01 | 1.00E+00 | 0.86  | 1.90E-01 | 7.45E-01 |
| NAE1        | -0.20 | 3.42E-01 | 1.00E+00 | -0.41 | 1.90E-01 | 7.45E-01 |
| OR7E15P     | 0.50  | 7.91E-01 | 1.00E+00 | -2.26 | 1.90E-01 | 7.45E-01 |
| SOX6        | 0.01  | 9.74E-01 | 1.00E+00 | -0.50 | 1.90E-01 | 7.45E-01 |
| SDSL        | -0.18 | 6.47E-01 | 1.00E+00 | 0.78  | 1.90E-01 | 7.45E-01 |
| GPT         | 0.08  | 8.55E-01 | 1.00E+00 | -0.47 | 1.90E-01 | 7.45E-01 |
| DLG1        | 0.41  | 5.08E-02 | 1.00E+00 | -0.73 | 1.90E-01 | 7.45E-01 |
| RTN1        | -0.58 | 1.53E-01 | 1.00E+00 | -1.00 | 1.90E-01 | 7.45E-01 |
| UNC50       | -0.01 | 9.53E-01 | 1.00E+00 | -0.40 | 1.90E-01 | 7.45E-01 |
| FLOT1       | 0.18  | 6.39E-01 | 1.00E+00 | 0.49  | 1.90E-01 | 7.45E-01 |
| GCNT7       | -0.09 | 9.69E-01 | 1.00E+00 | -1.34 | 1.90E-01 | 7.45E-01 |
| HERC2P2     | -0.34 | 5.84E-01 | 1.00E+00 | 0.81  | 1.91E-01 | 7.45E-01 |
| SCTR        | 1.19  | 5.66E-01 | 1.00E+00 | -1.28 | 1.91E-01 | 7.45E-01 |
| HSPE1P25    | -0.80 | 8.18E-01 | 1.00E+00 | -0.99 | 1.91E-01 | 7.45E-01 |
| GTF2IP20    | -0.05 | 9.35E-01 | 1.00E+00 | 0.91  | 1.91E-01 | 7.45E-01 |
| XLOC_000019 | -0.72 | 1.02E-01 | 1.00E+00 | 0.80  | 1.91E-01 | 7.45E-01 |
| AC034199.1  | NA    | NA       | NA       | 2.39  | 1.91E-01 | 7.45E-01 |
| AC062017.1  | 0.14  | 8.77E-01 | 1.00E+00 | -0.88 | 1.91E-01 | 7.45E-01 |
| BEX5        | -0.60 | 1.49E-01 | 1.00E+00 | -0.43 | 1.91E-01 | 7.45E-01 |
| ZBTB38      | 0.04  | 8.24E-01 | 1.00E+00 | 0.20  | 1.91E-01 | 7.45E-01 |
| DGAT2       | 1.41  | 3.82E-03 | 3.38E-01 | -0.67 | 1.91E-01 | 7.45E-01 |
| SRSF10      | 0.12  | 7.05E-01 | 1.00E+00 | -0.34 | 1.91E-01 | 7.45E-01 |
| TMEM230     | 0.18  | 5.87E-01 | 1.00E+00 | -0.47 | 1.91E-01 | 7.45E-01 |

|                   |       |          |          |       |          |          |
|-------------------|-------|----------|----------|-------|----------|----------|
| <b>SPOPL</b>      | 0.08  | 8.24E-01 | 1.00E+00 | 0.31  | 1.91E-01 | 7.45E-01 |
| <b>ZNF787</b>     | -0.11 | 6.80E-01 | 1.00E+00 | 1.01  | 1.91E-01 | 7.45E-01 |
| <b>AL158206.1</b> | 0.95  | 3.55E-02 | 1.00E+00 | -0.65 | 1.91E-01 | 7.45E-01 |
| <b>AC009961.1</b> | -0.85 | 2.71E-01 | 1.00E+00 | -0.68 | 1.91E-01 | 7.45E-01 |
| <b>DMRT3</b>      | -0.12 | 8.87E-01 | 1.00E+00 | 1.11  | 1.91E-01 | 7.45E-01 |
| <b>CLEC2B</b>     | 0.15  | 7.03E-01 | 1.00E+00 | -0.61 | 1.91E-01 | 7.45E-01 |
| <b>WDR86-AS1</b>  | -0.13 | 9.25E-01 | 1.00E+00 | -1.22 | 1.91E-01 | 7.46E-01 |
| <b>CIDECP</b>     | 0.20  | 4.49E-01 | 1.00E+00 | -0.41 | 1.91E-01 | 7.46E-01 |
| <b>EIF5AL1</b>    | -0.67 | 3.70E-01 | 1.00E+00 | -0.62 | 1.91E-01 | 7.46E-01 |
| <b>ATP6AP1</b>    | -0.08 | 6.91E-01 | 1.00E+00 | 0.28  | 1.91E-01 | 7.46E-01 |
| <b>SH3GLB1</b>    | 0.10  | 6.41E-01 | 1.00E+00 | -0.15 | 1.91E-01 | 7.46E-01 |
| <b>MT-ND5</b>     | -0.10 | 7.98E-01 | 1.00E+00 | -0.44 | 1.91E-01 | 7.46E-01 |
| <b>DACT2</b>      | -0.29 | 4.26E-01 | 1.00E+00 | -0.89 | 1.91E-01 | 7.46E-01 |
| <b>ZNF383</b>     | 0.22  | 4.60E-01 | 1.00E+00 | -0.41 | 1.91E-01 | 7.46E-01 |
| <b>GMPR2</b>      | 0.05  | 7.70E-01 | 1.00E+00 | 0.18  | 1.91E-01 | 7.46E-01 |
| <b>G22255</b>     | -0.96 | 3.07E-01 | 1.00E+00 | -1.34 | 1.91E-01 | 7.46E-01 |
| <b>AC100854.1</b> | 0.17  | 8.16E-01 | 1.00E+00 | 1.06  | 1.91E-01 | 7.46E-01 |
| <b>PLN</b>        | -0.06 | 9.36E-01 | 1.00E+00 | -0.65 | 1.91E-01 | 7.46E-01 |
| <b>ZNF615</b>     | 0.31  | 2.62E-01 | 1.00E+00 | -0.41 | 1.91E-01 | 7.46E-01 |
| <b>CERKL</b>      | 0.04  | 9.35E-01 | 1.00E+00 | 0.64  | 1.91E-01 | 7.46E-01 |
| <b>AC008555.5</b> | 0.26  | 6.38E-01 | 1.00E+00 | -0.71 | 1.92E-01 | 7.46E-01 |
| <b>SCRN1</b>      | 0.07  | 8.46E-01 | 1.00E+00 | 0.39  | 1.92E-01 | 7.46E-01 |
| <b>AC079140.2</b> | 0.41  | 8.14E-01 | 1.00E+00 | -0.91 | 1.92E-01 | 7.46E-01 |
| <b>CEP95</b>      | -0.18 | 5.97E-01 | 1.00E+00 | 0.26  | 1.92E-01 | 7.46E-01 |
| <b>AL445223.1</b> | 1.13  | 7.44E-01 | 1.00E+00 | -2.80 | 1.92E-01 | 7.46E-01 |
| <b>CDH15</b>      | -2.41 | 1.45E-01 | 1.00E+00 | 1.57  | 1.92E-01 | 7.46E-01 |
| <b>ZNF345</b>     | -0.01 | 9.68E-01 | 1.00E+00 | -0.55 | 1.92E-01 | 7.46E-01 |
| <b>LINC02235</b>  | -1.00 | 5.36E-01 | 1.00E+00 | -1.44 | 1.92E-01 | 7.46E-01 |
| <b>HMGN3</b>      | 0.18  | 3.54E-01 | 1.00E+00 | -0.56 | 1.92E-01 | 7.46E-01 |
| <b>G29816</b>     | -0.50 | 6.26E-01 | 1.00E+00 | -1.11 | 1.92E-01 | 7.46E-01 |
| <b>MGST3</b>      | 0.08  | 8.02E-01 | 1.00E+00 | -0.44 | 1.92E-01 | 7.46E-01 |
| <b>ILF3</b>       | -0.09 | 5.82E-01 | 1.00E+00 | 0.44  | 1.92E-01 | 7.46E-01 |

|             |       |          |          |       |          |          |
|-------------|-------|----------|----------|-------|----------|----------|
| TAF15       | -0.15 | 4.96E-01 | 1.00E+00 | 0.98  | 1.92E-01 | 7.46E-01 |
| TFCP2L1     | 0.15  | 8.19E-01 | 1.00E+00 | -0.63 | 1.92E-01 | 7.46E-01 |
| BRD2        | -0.09 | 7.20E-01 | 1.00E+00 | 0.51  | 1.92E-01 | 7.46E-01 |
| HS3ST3A1    | -1.76 | 2.16E-05 | 6.33E-03 | 1.36  | 1.92E-01 | 7.46E-01 |
| RHOF        | -0.83 | 3.95E-01 | 1.00E+00 | 0.80  | 1.92E-01 | 7.46E-01 |
| C17orf100   | -0.06 | 8.55E-01 | 1.00E+00 | -0.53 | 1.92E-01 | 7.46E-01 |
| HAAO        | 0.10  | 7.42E-01 | 1.00E+00 | 0.40  | 1.92E-01 | 7.46E-01 |
| AC109347.2  | -1.58 | 3.88E-01 | 1.00E+00 | 0.85  | 1.92E-01 | 7.46E-01 |
| CPNE5       | -0.81 | 9.61E-02 | 1.00E+00 | 0.74  | 1.92E-01 | 7.46E-01 |
| EEF1DP4     | -2.31 | 8.95E-02 | 1.00E+00 | -1.98 | 1.92E-01 | 7.46E-01 |
| C5orf67     | -1.42 | 1.59E-01 | 1.00E+00 | -1.49 | 1.92E-01 | 7.46E-01 |
| AL022323.4  | 0.34  | 7.97E-01 | 1.00E+00 | 1.08  | 1.92E-01 | 7.46E-01 |
| EFCAB10     | -1.18 | 2.11E-01 | 1.00E+00 | 0.77  | 1.92E-01 | 7.46E-01 |
| MAPK3       | -0.09 | 6.23E-01 | 1.00E+00 | 0.63  | 1.92E-01 | 7.46E-01 |
| COX7A1      | 0.26  | 6.80E-01 | 1.00E+00 | -0.65 | 1.92E-01 | 7.46E-01 |
| XLOC_009459 | -0.09 | 9.54E-01 | 1.00E+00 | 1.12  | 1.92E-01 | 7.46E-01 |
| TIRAP       | 0.12  | 7.79E-01 | 1.00E+00 | 0.41  | 1.92E-01 | 7.46E-01 |
| INTS2       | 0.24  | 4.05E-01 | 1.00E+00 | -0.33 | 1.93E-01 | 7.46E-01 |
| QRSL1       | 0.08  | 6.72E-01 | 1.00E+00 | 0.28  | 1.93E-01 | 7.46E-01 |
| TNFRSF13C   | -0.45 | 4.57E-01 | 1.00E+00 | 0.78  | 1.93E-01 | 7.46E-01 |
| AL031281.2  | -0.46 | 6.95E-01 | 1.00E+00 | 1.16  | 1.93E-01 | 7.46E-01 |
| LINC01287   | 2.74  | 4.16E-01 | 1.00E+00 | 2.39  | 1.93E-01 | 7.46E-01 |
| CBR3-AS1    | 0.25  | 5.06E-01 | 1.00E+00 | -0.58 | 1.93E-01 | 7.46E-01 |
| PICSAR      | -0.46 | 2.04E-01 | 1.00E+00 | 0.88  | 1.93E-01 | 7.46E-01 |
| S100P       | -0.85 | 1.04E-01 | 1.00E+00 | 0.72  | 1.93E-01 | 7.46E-01 |
| AL590560.1  | -0.99 | 1.16E-01 | 1.00E+00 | -1.25 | 1.93E-01 | 7.46E-01 |
| AL596244.1  | 0.14  | 8.04E-01 | 1.00E+00 | 1.17  | 1.93E-01 | 7.46E-01 |
| AC087294.1  | -1.92 | 2.08E-01 | 1.00E+00 | -1.53 | 1.93E-01 | 7.46E-01 |
| TEF         | -0.47 | 1.80E-01 | 1.00E+00 | -0.49 | 1.93E-01 | 7.46E-01 |
| PALD1       | 0.22  | 4.75E-01 | 1.00E+00 | 1.01  | 1.93E-01 | 7.46E-01 |
| AC011447.3  | 0.72  | 5.09E-01 | 1.00E+00 | 1.38  | 1.93E-01 | 7.46E-01 |
| RUFY3       | -0.31 | 2.05E-01 | 1.00E+00 | -0.37 | 1.93E-01 | 7.46E-01 |

|                   |       |          |          |       |          |          |
|-------------------|-------|----------|----------|-------|----------|----------|
| <b>BRWD1-IT2</b>  | -0.15 | 8.19E-01 | 1.00E+00 | -1.07 | 1.93E-01 | 7.46E-01 |
| <b>FTH1P7</b>     | 0.53  | 5.31E-01 | 1.00E+00 | -0.72 | 1.93E-01 | 7.46E-01 |
| <b>TMEM243</b>    | 0.30  | 1.67E-01 | 1.00E+00 | -0.30 | 1.93E-01 | 7.46E-01 |
| <b>ANKRD20A7P</b> | 1.22  | 3.45E-01 | 1.00E+00 | 1.38  | 1.93E-01 | 7.46E-01 |
| <b>TESC</b>       | 0.08  | 9.07E-01 | 1.00E+00 | -0.79 | 1.93E-01 | 7.46E-01 |
| <b>SMG7</b>       | -0.04 | 8.49E-01 | 1.00E+00 | 0.37  | 1.93E-01 | 7.46E-01 |
| <b>SPOP</b>       | 0.33  | 1.03E-01 | 1.00E+00 | -0.23 | 1.93E-01 | 7.46E-01 |
| <b>AC104563.1</b> | 0.63  | 6.52E-01 | 1.00E+00 | -0.84 | 1.93E-01 | 7.46E-01 |
| <b>CCR10</b>      | -0.45 | 6.05E-01 | 1.00E+00 | 0.75  | 1.93E-01 | 7.46E-01 |
| <b>AC245060.4</b> | -0.07 | 8.09E-01 | 1.00E+00 | -0.36 | 1.93E-01 | 7.46E-01 |
| <b>FAM72C</b>     | -0.15 | 9.19E-01 | 1.00E+00 | -0.97 | 1.93E-01 | 7.46E-01 |
| <b>C22orf24</b>   | -2.57 | 2.37E-01 | 1.00E+00 | 1.62  | 1.93E-01 | 7.46E-01 |
| <b>SMILR</b>      | -0.69 | 6.76E-01 | 1.00E+00 | 1.59  | 1.93E-01 | 7.46E-01 |
| <b>LMBR1</b>      | 0.05  | 7.56E-01 | 1.00E+00 | -0.43 | 1.93E-01 | 7.46E-01 |
| <b>TTC25</b>      | -0.20 | 7.64E-01 | 1.00E+00 | -0.72 | 1.93E-01 | 7.46E-01 |
| <b>NLGN3</b>      | -0.03 | 9.51E-01 | 1.00E+00 | 0.87  | 1.93E-01 | 7.46E-01 |
| <b>CYLD</b>       | 0.00  | 1.00E+00 | 1.00E+00 | 0.34  | 1.93E-01 | 7.46E-01 |
| <b>AC004975.2</b> | -2.79 | 1.72E-02 | 8.25E-01 | 1.73  | 1.94E-01 | 7.46E-01 |
| <b>AL157395.1</b> | -2.30 | 1.54E-01 | 1.00E+00 | -1.60 | 1.94E-01 | 7.46E-01 |
| <b>RTN4RL1</b>    | 0.28  | 2.49E-01 | 1.00E+00 | -0.99 | 1.94E-01 | 7.46E-01 |
| <b>AC007671.1</b> | 1.10  | 4.97E-01 | 1.00E+00 | 1.61  | 1.94E-01 | 7.46E-01 |
| <b>KLRG1</b>      | 1.19  | 1.95E-01 | 1.00E+00 | -0.84 | 1.94E-01 | 7.46E-01 |
| <b>CFLAR</b>      | -0.01 | 9.57E-01 | 1.00E+00 | 0.36  | 1.94E-01 | 7.46E-01 |
| <b>COLEC11</b>    | -0.34 | 6.83E-01 | 1.00E+00 | 1.15  | 1.94E-01 | 7.46E-01 |
| <b>FABP5P7</b>    | -0.03 | 9.35E-01 | 1.00E+00 | 0.53  | 1.94E-01 | 7.46E-01 |
| <b>AC007342.3</b> | 0.13  | 9.70E-01 | 1.00E+00 | 1.40  | 1.94E-01 | 7.46E-01 |
| <b>EIF3LP2</b>    | -0.50 | 8.26E-01 | 1.00E+00 | -0.91 | 1.94E-01 | 7.46E-01 |
| <b>KPNA6</b>      | 0.04  | 7.79E-01 | 1.00E+00 | 0.29  | 1.94E-01 | 7.46E-01 |
| <b>BZW1P2</b>     | -0.05 | 9.18E-01 | 1.00E+00 | -0.41 | 1.94E-01 | 7.46E-01 |
| <b>CD248</b>      | 0.40  | 4.22E-01 | 1.00E+00 | 0.78  | 1.94E-01 | 7.46E-01 |
| <b>SSUH2</b>      | -0.66 | 5.00E-01 | 1.00E+00 | 0.98  | 1.94E-01 | 7.46E-01 |
| <b>CSTB</b>       | -0.01 | 9.74E-01 | 1.00E+00 | 0.33  | 1.94E-01 | 7.46E-01 |

|            |       |          |          |       |          |          |
|------------|-------|----------|----------|-------|----------|----------|
| SH3BP5-AS1 | 0.97  | 2.70E-01 | 1.00E+00 | 0.78  | 1.94E-01 | 7.47E-01 |
| AL162231.2 | 0.36  | 3.33E-01 | 1.00E+00 | 0.56  | 1.94E-01 | 7.47E-01 |
| ZNF408     | -0.14 | 6.01E-01 | 1.00E+00 | 0.34  | 1.94E-01 | 7.47E-01 |
| GRIK4      | -0.33 | 5.71E-01 | 1.00E+00 | -1.17 | 1.94E-01 | 7.47E-01 |
| SEZ6       | -2.60 | 3.36E-02 | 1.00E+00 | -1.39 | 1.94E-01 | 7.47E-01 |
| PPP1R9A    | 0.72  | 3.75E-01 | 1.00E+00 | -0.72 | 1.94E-01 | 7.47E-01 |
| AC010168.2 | 0.10  | 9.05E-01 | 1.00E+00 | 0.86  | 1.94E-01 | 7.47E-01 |
| POLR2K     | 0.22  | 3.24E-01 | 1.00E+00 | -0.52 | 1.94E-01 | 7.47E-01 |
| SLIRP      | -0.04 | 8.55E-01 | 1.00E+00 | -0.67 | 1.94E-01 | 7.47E-01 |
| LINC02473  | -2.44 | 3.04E-01 | 1.00E+00 | -1.89 | 1.94E-01 | 7.47E-01 |
| DLGAP4     | -0.22 | 2.98E-01 | 1.00E+00 | 0.26  | 1.94E-01 | 7.47E-01 |
| NIT2       | -0.02 | 9.25E-01 | 1.00E+00 | -0.33 | 1.94E-01 | 7.47E-01 |
| C6orf222   | 0.67  | 5.37E-01 | 1.00E+00 | 1.60  | 1.94E-01 | 7.47E-01 |
| SDHDP6     | 1.57  | 1.57E-01 | 1.00E+00 | -0.67 | 1.94E-01 | 7.47E-01 |
| LINC01254  | -0.13 | 7.60E-01 | 1.00E+00 | -1.04 | 1.94E-01 | 7.47E-01 |
| DAZAP1     | -0.33 | 2.92E-01 | 1.00E+00 | 0.68  | 1.95E-01 | 7.47E-01 |
| AL022476.1 | 0.17  | 8.90E-01 | 1.00E+00 | -0.99 | 1.95E-01 | 7.47E-01 |
| C1QTNF1    | 0.58  | 1.74E-01 | 1.00E+00 | 0.90  | 1.95E-01 | 7.47E-01 |
| KREMEN2    | -0.81 | 1.57E-01 | 1.00E+00 | -1.25 | 1.95E-01 | 7.47E-01 |
| G41779     | -0.02 | 9.81E-01 | 1.00E+00 | 0.93  | 1.95E-01 | 7.47E-01 |
| AC137932.2 | -1.83 | 3.51E-01 | 1.00E+00 | -1.45 | 1.95E-01 | 7.47E-01 |
| RABEP2     | -0.13 | 6.18E-01 | 1.00E+00 | 0.52  | 1.95E-01 | 7.47E-01 |
| AL133371.2 | 0.53  | 6.01E-01 | 1.00E+00 | 1.86  | 1.95E-01 | 7.47E-01 |
| AL161772.1 | 0.85  | 3.59E-01 | 1.00E+00 | -1.38 | 1.95E-01 | 7.47E-01 |
| RAD54B     | -1.22 | 1.91E-01 | 1.00E+00 | 0.64  | 1.95E-01 | 7.47E-01 |
| AC006946.2 | -0.28 | 8.26E-01 | 1.00E+00 | -1.20 | 1.95E-01 | 7.47E-01 |
| AL160408.1 | -2.00 | 2.91E-01 | 1.00E+00 | 1.10  | 1.95E-01 | 7.47E-01 |
| NR2C1      | 0.07  | 8.35E-01 | 1.00E+00 | -0.31 | 1.95E-01 | 7.47E-01 |
| BZW2       | -0.06 | 7.87E-01 | 1.00E+00 | -0.26 | 1.95E-01 | 7.47E-01 |
| S100A2     | -0.69 | 9.30E-02 | 1.00E+00 | 0.71  | 1.95E-01 | 7.47E-01 |
| PLXNB2     | -0.26 | 2.56E-01 | 1.00E+00 | 0.73  | 1.95E-01 | 7.47E-01 |
| ASH1L-AS1  | -0.26 | 4.98E-01 | 1.00E+00 | 0.55  | 1.95E-01 | 7.47E-01 |

|                   |       |          |          |       |          |          |
|-------------------|-------|----------|----------|-------|----------|----------|
| <b>BEND3</b>      | -0.10 | 8.09E-01 | 1.00E+00 | 0.77  | 1.95E-01 | 7.47E-01 |
| <b>TAP1</b>       | -0.11 | 8.05E-01 | 1.00E+00 | 0.62  | 1.95E-01 | 7.47E-01 |
| <b>TNIP1</b>      | 0.30  | 3.04E-01 | 1.00E+00 | 0.62  | 1.95E-01 | 7.47E-01 |
| <b>HIST1H2BD</b>  | -0.65 | 2.77E-01 | 1.00E+00 | 0.55  | 1.95E-01 | 7.47E-01 |
| <b>CREM</b>       | 0.15  | 6.14E-01 | 1.00E+00 | 0.30  | 1.95E-01 | 7.48E-01 |
| <b>BPHL</b>       | 0.11  | 6.12E-01 | 1.00E+00 | -0.37 | 1.95E-01 | 7.48E-01 |
| <b>CARD6</b>      | 0.46  | 3.68E-01 | 1.00E+00 | 0.87  | 1.96E-01 | 7.48E-01 |
| <b>HIST1H4J</b>   | 1.35  | 2.23E-01 | 1.00E+00 | 0.45  | 1.96E-01 | 7.48E-01 |
| <b>AC046158.3</b> | -1.28 | 7.10E-01 | 1.00E+00 | 2.06  | 1.96E-01 | 7.48E-01 |
| <b>AC099568.2</b> | -0.41 | 6.45E-01 | 1.00E+00 | -1.09 | 1.96E-01 | 7.48E-01 |
| <b>ESRRAP2</b>    | 1.57  | 5.00E-01 | 1.00E+00 | 1.42  | 1.96E-01 | 7.48E-01 |
| <b>NUDCD1</b>     | -0.05 | 8.74E-01 | 1.00E+00 | -0.32 | 1.96E-01 | 7.48E-01 |
| <b>ENKD1</b>      | -0.20 | 4.52E-01 | 1.00E+00 | 0.63  | 1.96E-01 | 7.48E-01 |
| <b>POFUT2</b>     | 0.23  | 5.68E-01 | 1.00E+00 | 0.79  | 1.96E-01 | 7.48E-01 |
| <b>JARID2-AS1</b> | -0.33 | 8.23E-01 | 1.00E+00 | 1.26  | 1.96E-01 | 7.48E-01 |
| <b>SPATA6L</b>    | 0.80  | 1.48E-01 | 1.00E+00 | 0.55  | 1.96E-01 | 7.49E-01 |
| <b>IL17C</b>      | -1.72 | 6.11E-01 | 1.00E+00 | 1.92  | 1.96E-01 | 7.49E-01 |
| <b>RRAGD</b>      | 0.14  | 7.02E-01 | 1.00E+00 | -0.44 | 1.96E-01 | 7.49E-01 |
| <b>FAM204A</b>    | 0.00  | 9.89E-01 | 1.00E+00 | -0.38 | 1.96E-01 | 7.49E-01 |
| <b>ZEB2</b>       | 0.09  | 8.38E-01 | 1.00E+00 | 0.52  | 1.96E-01 | 7.49E-01 |
| <b>DCST1</b>      | -0.25 | 7.98E-01 | 1.00E+00 | 0.82  | 1.96E-01 | 7.49E-01 |
| <b>GTF3C2</b>     | 0.08  | 7.20E-01 | 1.00E+00 | 0.27  | 1.96E-01 | 7.49E-01 |
| <b>ATXN2L</b>     | -0.27 | 2.23E-01 | 1.00E+00 | 0.73  | 1.96E-01 | 7.49E-01 |
| <b>GSN-AS1</b>    | 1.42  | 1.67E-01 | 1.00E+00 | 0.94  | 1.96E-01 | 7.49E-01 |
| <b>NUCKS1</b>     | 0.21  | 1.80E-01 | 1.00E+00 | 0.41  | 1.96E-01 | 7.49E-01 |
| <b>MT1X</b>       | -0.02 | 9.64E-01 | 1.00E+00 | -0.93 | 1.96E-01 | 7.49E-01 |
| <b>MAP3K15</b>    | 1.33  | 3.27E-01 | 1.00E+00 | 0.92  | 1.96E-01 | 7.49E-01 |
| <b>NOS1</b>       | -0.45 | 3.21E-01 | 1.00E+00 | -0.85 | 1.96E-01 | 7.49E-01 |
| <b>C2orf49</b>    | 0.07  | 7.73E-01 | 1.00E+00 | -0.36 | 1.96E-01 | 7.49E-01 |
| <b>TBC1D8-AS1</b> | -0.93 | 2.18E-01 | 1.00E+00 | 1.14  | 1.97E-01 | 7.49E-01 |
| <b>ZNF660</b>     | 0.16  | 8.48E-01 | 1.00E+00 | 1.02  | 1.97E-01 | 7.49E-01 |
| <b>LYRM2</b>      | 0.06  | 7.23E-01 | 1.00E+00 | -0.30 | 1.97E-01 | 7.49E-01 |

|                   |       |          |          |       |          |          |
|-------------------|-------|----------|----------|-------|----------|----------|
| <b>SPPL2B</b>     | -0.04 | 8.60E-01 | 1.00E+00 | 0.43  | 1.97E-01 | 7.49E-01 |
| <b>TOX4</b>       | -0.16 | 5.08E-01 | 1.00E+00 | 0.25  | 1.97E-01 | 7.49E-01 |
| <b>GPCPD1</b>     | -0.18 | 5.37E-01 | 1.00E+00 | 0.28  | 1.97E-01 | 7.49E-01 |
| <b>LZTS1</b>      | -0.49 | 3.96E-02 | 1.00E+00 | 0.88  | 1.97E-01 | 7.49E-01 |
| <b>TSPAN3</b>     | 0.16  | 5.42E-01 | 1.00E+00 | -0.42 | 1.97E-01 | 7.49E-01 |
| <b>CEP135</b>     | -0.48 | 5.00E-02 | 1.00E+00 | 0.30  | 1.97E-01 | 7.49E-01 |
| <b>DYM</b>        | 0.14  | 5.01E-01 | 1.00E+00 | -0.23 | 1.97E-01 | 7.49E-01 |
| <b>TAF9</b>       | -0.06 | 8.19E-01 | 1.00E+00 | -0.50 | 1.97E-01 | 7.49E-01 |
| <b>PCYT1B</b>     | -0.36 | 7.15E-01 | 1.00E+00 | 1.41  | 1.97E-01 | 7.49E-01 |
| <b>AC119674.1</b> | -1.09 | 3.98E-01 | 1.00E+00 | -1.28 | 1.97E-01 | 7.49E-01 |
| <b>CLCN5</b>      | 0.22  | 4.37E-01 | 1.00E+00 | 0.56  | 1.97E-01 | 7.49E-01 |
| <b>NEFH</b>       | -2.18 | 1.92E-05 | 5.70E-03 | 1.36  | 1.97E-01 | 7.49E-01 |
| <b>AC010247.2</b> | 1.55  | 1.76E-01 | 1.00E+00 | 1.67  | 1.97E-01 | 7.49E-01 |
| <b>ITLN2</b>      | -1.17 | 2.68E-01 | 1.00E+00 | -1.30 | 1.97E-01 | 7.49E-01 |
| <b>NIFK-AS1</b>   | 0.16  | 6.82E-01 | 1.00E+00 | -0.41 | 1.97E-01 | 7.49E-01 |
| <b>MTIF3</b>      | 0.03  | 8.72E-01 | 1.00E+00 | -0.39 | 1.97E-01 | 7.49E-01 |
| <b>AC073896.4</b> | -0.59 | 5.66E-01 | 1.00E+00 | -0.71 | 1.97E-01 | 7.49E-01 |
| <b>SPRR5</b>      | 0.59  | 6.26E-01 | 1.00E+00 | 1.00  | 1.97E-01 | 7.49E-01 |
| <b>AC117490.2</b> | -1.85 | 4.36E-01 | 1.00E+00 | -1.50 | 1.97E-01 | 7.49E-01 |
| <b>CD96</b>       | -0.69 | 2.84E-01 | 1.00E+00 | 1.05  | 1.97E-01 | 7.49E-01 |
| <b>AL445673.1</b> | -0.34 | 7.81E-01 | 1.00E+00 | -1.46 | 1.97E-01 | 7.49E-01 |
| <b>SCNN1G</b>     | -0.63 | 2.10E-01 | 1.00E+00 | -0.90 | 1.97E-01 | 7.49E-01 |
| <b>CNTNAP3</b>    | 0.58  | 1.33E-01 | 1.00E+00 | -0.51 | 1.97E-01 | 7.49E-01 |
| <b>ELMO2</b>      | 0.06  | 7.97E-01 | 1.00E+00 | 0.30  | 1.97E-01 | 7.49E-01 |
| <b>WASF1</b>      | -0.23 | 5.69E-01 | 1.00E+00 | 0.45  | 1.97E-01 | 7.49E-01 |
| <b>STAM</b>       | 0.12  | 6.44E-01 | 1.00E+00 | 0.22  | 1.97E-01 | 7.49E-01 |
| <b>EPOR</b>       | 0.33  | 3.62E-01 | 1.00E+00 | 0.52  | 1.97E-01 | 7.49E-01 |
| <b>AC003681.1</b> | 0.84  | 2.46E-01 | 1.00E+00 | 0.55  | 1.98E-01 | 7.49E-01 |
| <b>NUPR2</b>      | 1.14  | 8.91E-02 | 1.00E+00 | -0.78 | 1.98E-01 | 7.49E-01 |
| <b>XYLT1</b>      | 0.33  | 2.46E-01 | 1.00E+00 | 0.53  | 1.98E-01 | 7.49E-01 |
| <b>CAMK2G</b>     | -0.14 | 5.81E-01 | 1.00E+00 | 0.49  | 1.98E-01 | 7.49E-01 |
| <b>ANKRD33B</b>   | -0.27 | 4.17E-01 | 1.00E+00 | -0.55 | 1.98E-01 | 7.49E-01 |

|            |       |          |          |       |          |          |
|------------|-------|----------|----------|-------|----------|----------|
| SH3BP5L    | 0.18  | 4.87E-01 | 1.00E+00 | 0.75  | 1.98E-01 | 7.49E-01 |
| IGHV1-46   | 2.03  | 4.35E-01 | 1.00E+00 | 2.50  | 1.98E-01 | 7.49E-01 |
| NOD2       | -0.24 | 6.68E-01 | 1.00E+00 | 0.68  | 1.98E-01 | 7.49E-01 |
| SPOCD1     | -1.38 | 2.01E-01 | 1.00E+00 | 1.31  | 1.98E-01 | 7.49E-01 |
| PDIA5      | 0.08  | 8.50E-01 | 1.00E+00 | 0.62  | 1.98E-01 | 7.49E-01 |
| SCRN3      | 0.10  | 6.92E-01 | 1.00E+00 | -0.23 | 1.98E-01 | 7.49E-01 |
| AC131235.4 | -2.25 | 5.03E-01 | 1.00E+00 | -1.98 | 1.98E-01 | 7.49E-01 |
| CXorf40B   | 0.31  | 2.46E-01 | 1.00E+00 | 0.31  | 1.98E-01 | 7.49E-01 |
| CDSN       | -0.67 | 5.03E-01 | 1.00E+00 | 1.21  | 1.98E-01 | 7.49E-01 |
| MACO1      | 0.07  | 6.96E-01 | 1.00E+00 | 0.55  | 1.98E-01 | 7.49E-01 |
| LEF1       | -0.54 | 1.04E-01 | 1.00E+00 | 0.59  | 1.98E-01 | 7.49E-01 |
| RNF222     | -0.19 | 8.06E-01 | 1.00E+00 | 1.05  | 1.98E-01 | 7.49E-01 |
| DOCK5      | -0.14 | 6.85E-01 | 1.00E+00 | 0.42  | 1.98E-01 | 7.49E-01 |
| AC068580.1 | -3.44 | 3.39E-02 | 1.00E+00 | 1.94  | 1.98E-01 | 7.49E-01 |
| FTH1P2     | -0.01 | 9.88E-01 | 1.00E+00 | -0.77 | 1.98E-01 | 7.49E-01 |
| TOM1       | -0.11 | 6.96E-01 | 1.00E+00 | 0.28  | 1.98E-01 | 7.49E-01 |
| KCNJ14     | -0.94 | 4.86E-02 | 1.00E+00 | 0.79  | 1.98E-01 | 7.50E-01 |
| SRSF9      | -0.06 | 7.66E-01 | 1.00E+00 | -0.66 | 1.98E-01 | 7.50E-01 |
| GSDME      | -0.06 | 9.21E-01 | 1.00E+00 | 0.74  | 1.98E-01 | 7.50E-01 |
| AC090515.2 | -0.98 | 2.89E-01 | 1.00E+00 | -0.80 | 1.99E-01 | 7.50E-01 |
| SNORA33    | -1.67 | 6.26E-01 | 1.00E+00 | -1.60 | 1.99E-01 | 7.50E-01 |
| LINC01597  | 1.79  | 5.58E-01 | 1.00E+00 | 1.37  | 1.99E-01 | 7.50E-01 |
| TRGV9      | -0.75 | 6.70E-01 | 1.00E+00 | 1.81  | 1.99E-01 | 7.50E-01 |
| SMARCD1    | -0.17 | 2.26E-01 | 1.00E+00 | 0.59  | 1.99E-01 | 7.50E-01 |
| MYLK-AS1   | 0.89  | 4.97E-01 | 1.00E+00 | -0.91 | 1.99E-01 | 7.50E-01 |
| FBXO44     | 0.11  | 6.59E-01 | 1.00E+00 | 0.27  | 1.99E-01 | 7.50E-01 |
| SYAP1      | -0.14 | 2.86E-01 | 1.00E+00 | -0.26 | 1.99E-01 | 7.50E-01 |
| LINC02367  | -2.83 | 1.79E-01 | 1.00E+00 | -0.75 | 1.99E-01 | 7.50E-01 |
| SUMO1      | 0.05  | 7.12E-01 | 1.00E+00 | -0.41 | 1.99E-01 | 7.50E-01 |
| ZNF468     | 0.12  | 6.64E-01 | 1.00E+00 | -0.39 | 1.99E-01 | 7.50E-01 |
| AL450998.1 | 1.14  | 5.65E-01 | 1.00E+00 | 1.10  | 1.99E-01 | 7.50E-01 |
| AC100803.1 | -1.95 | 5.51E-01 | 1.00E+00 | 2.84  | 1.99E-01 | 7.50E-01 |



|             |       |          |          |       |          |          |
|-------------|-------|----------|----------|-------|----------|----------|
| ARID1A      | -0.42 | 7.28E-02 | 1.00E+00 | 0.51  | 1.99E-01 | 7.50E-01 |
| FAHD2CP     | -0.42 | 4.48E-01 | 1.00E+00 | -0.43 | 1.99E-01 | 7.50E-01 |
| PPCS        | 0.16  | 3.89E-01 | 1.00E+00 | -0.51 | 1.99E-01 | 7.50E-01 |
| DCAF11      | 0.06  | 6.96E-01 | 1.00E+00 | -0.17 | 1.99E-01 | 7.50E-01 |
| OLFML2A     | -0.07 | 8.16E-01 | 1.00E+00 | 0.45  | 1.99E-01 | 7.51E-01 |
| LY6K        | -0.16 | 7.29E-01 | 1.00E+00 | -0.52 | 1.99E-01 | 7.51E-01 |
| TRMT13      | 0.10  | 7.76E-01 | 1.00E+00 | -0.34 | 1.99E-01 | 7.51E-01 |
| CCNL1       | -0.17 | 5.92E-01 | 1.00E+00 | 0.36  | 1.99E-01 | 7.51E-01 |
| GPN1        | -0.01 | 9.68E-01 | 1.00E+00 | -0.42 | 1.99E-01 | 7.51E-01 |
| MSI1        | -0.94 | 1.80E-01 | 1.00E+00 | 1.12  | 1.99E-01 | 7.51E-01 |
| S100B       | 0.74  | 2.98E-01 | 1.00E+00 | -0.66 | 1.99E-01 | 7.51E-01 |
| XLOC_001376 | -1.12 | 4.47E-01 | 1.00E+00 | 1.59  | 1.99E-01 | 7.51E-01 |
| AC009078.2  | 0.21  | 8.84E-01 | 1.00E+00 | 2.48  | 1.99E-01 | 7.51E-01 |
| GNMT        | -0.46 | 7.59E-01 | 1.00E+00 | -1.24 | 1.99E-01 | 7.51E-01 |
| SETD3       | 0.09  | 5.23E-01 | 1.00E+00 | -0.27 | 1.99E-01 | 7.51E-01 |
| MTX3        | 0.34  | 1.74E-01 | 1.00E+00 | -0.29 | 2.00E-01 | 7.51E-01 |
| LAMB3       | -0.22 | 4.18E-01 | 1.00E+00 | 0.50  | 2.00E-01 | 7.51E-01 |
| AC138305.1  | -0.11 | 8.74E-01 | 1.00E+00 | -0.79 | 2.00E-01 | 7.51E-01 |
| TENM4       | -0.23 | 6.11E-01 | 1.00E+00 | 0.61  | 2.00E-01 | 7.51E-01 |
| BRINP3      | 1.47  | 3.10E-01 | 1.00E+00 | 1.39  | 2.00E-01 | 7.51E-01 |
| P2RY4       | 0.18  | 8.77E-01 | 1.00E+00 | -1.27 | 2.00E-01 | 7.51E-01 |
| MKRN1       | 0.09  | 6.26E-01 | 1.00E+00 | -0.50 | 2.00E-01 | 7.51E-01 |
| SYNJ2       | -0.13 | 6.52E-01 | 1.00E+00 | 0.70  | 2.00E-01 | 7.51E-01 |
| WASL        | -0.08 | 6.33E-01 | 1.00E+00 | -0.27 | 2.00E-01 | 7.51E-01 |
| KIAA0895LP1 | -1.50 | 1.72E-01 | 1.00E+00 | 1.45  | 2.00E-01 | 7.51E-01 |
| HELQ        | -0.02 | 9.05E-01 | 1.00E+00 | -0.30 | 2.00E-01 | 7.51E-01 |
| RBBP4       | -0.03 | 8.76E-01 | 1.00E+00 | -0.21 | 2.00E-01 | 7.51E-01 |
| PCDHA7      | -2.84 | 9.77E-03 | 6.13E-01 | 1.96  | 2.00E-01 | 7.51E-01 |
| PCDHAC1     | 0.39  | 7.34E-01 | 1.00E+00 | 1.48  | 2.00E-01 | 7.51E-01 |
| ANGPTL2     | 0.24  | 6.33E-01 | 1.00E+00 | 0.72  | 2.00E-01 | 7.51E-01 |
| TMEM189     | 0.00  | 9.92E-01 | 1.00E+00 | -0.25 | 2.00E-01 | 7.51E-01 |
| AC007637.1  | 1.49  | 8.74E-02 | 1.00E+00 | -1.18 | 2.00E-01 | 7.51E-01 |

|                   |       |          |          |       |          |          |
|-------------------|-------|----------|----------|-------|----------|----------|
| <b>AC019193.2</b> | 1.19  | 3.69E-01 | 1.00E+00 | -1.45 | 2.00E-01 | 7.52E-01 |
| <b>GSTZ1</b>      | -0.08 | 7.44E-01 | 1.00E+00 | 0.20  | 2.00E-01 | 7.52E-01 |
| <b>SHPRH</b>      | -0.07 | 8.01E-01 | 1.00E+00 | -0.36 | 2.00E-01 | 7.52E-01 |
| <b>GNB1L</b>      | -0.02 | 9.59E-01 | 1.00E+00 | 0.31  | 2.00E-01 | 7.52E-01 |
| <b>ATP6V1C1</b>   | 0.35  | 1.58E-01 | 1.00E+00 | -0.28 | 2.01E-01 | 7.52E-01 |
| <b>CEP57L1</b>    | 0.08  | 8.17E-01 | 1.00E+00 | -0.39 | 2.01E-01 | 7.52E-01 |
| <b>RAB12</b>      | 0.08  | 6.59E-01 | 1.00E+00 | 0.82  | 2.01E-01 | 7.52E-01 |
| <b>DDX17</b>      | -0.12 | 7.00E-01 | 1.00E+00 | 0.42  | 2.01E-01 | 7.52E-01 |
| <b>LRRN2</b>      | -0.15 | 8.01E-01 | 1.00E+00 | 1.62  | 2.01E-01 | 7.52E-01 |
| <b>PPP5D1</b>     | -0.40 | 4.58E-01 | 1.00E+00 | -0.77 | 2.01E-01 | 7.52E-01 |
| <b>FAM186B</b>    | -2.28 | 3.14E-02 | 1.00E+00 | 1.07  | 2.01E-01 | 7.52E-01 |
| <b>SYTL2</b>      | -0.10 | 6.67E-01 | 1.00E+00 | 0.41  | 2.01E-01 | 7.52E-01 |
| <b>MNT</b>        | -0.77 | 9.36E-03 | 6.05E-01 | 0.73  | 2.01E-01 | 7.52E-01 |
| <b>DDX28</b>      | -0.18 | 4.52E-01 | 1.00E+00 | 0.29  | 2.01E-01 | 7.52E-01 |
| <b>FILIP1L</b>    | -0.24 | 5.25E-01 | 1.00E+00 | 0.35  | 2.01E-01 | 7.52E-01 |
| <b>TSC22D4</b>    | -0.29 | 2.55E-01 | 1.00E+00 | 0.59  | 2.01E-01 | 7.52E-01 |
| <b>DLX2</b>       | -1.13 | 2.28E-01 | 1.00E+00 | 1.20  | 2.01E-01 | 7.52E-01 |
| <b>CAMLG</b>      | 0.09  | 6.29E-01 | 1.00E+00 | -0.36 | 2.01E-01 | 7.52E-01 |
| <b>RPS6KA3</b>    | 0.00  | 9.94E-01 | 1.00E+00 | -0.30 | 2.01E-01 | 7.52E-01 |
| <b>AC090948.3</b> | -2.79 | 4.10E-01 | 1.00E+00 | 1.99  | 2.01E-01 | 7.52E-01 |
| <b>TESPA1</b>     | -0.20 | 7.23E-01 | 1.00E+00 | 0.90  | 2.01E-01 | 7.52E-01 |
| <b>AC135721.1</b> | -1.57 | 9.55E-02 | 1.00E+00 | -1.49 | 2.01E-01 | 7.52E-01 |
| <b>AP003469.2</b> | -1.99 | 1.91E-01 | 1.00E+00 | -1.48 | 2.01E-01 | 7.52E-01 |
| <b>MTHFD1L</b>    | -0.05 | 8.74E-01 | 1.00E+00 | 0.74  | 2.01E-01 | 7.52E-01 |
| <b>COX5BP6</b>    | 0.45  | 7.47E-01 | 1.00E+00 | 1.23  | 2.01E-01 | 7.53E-01 |
| <b>PTPRG</b>      | 0.42  | 2.19E-01 | 1.00E+00 | 0.57  | 2.01E-01 | 7.53E-01 |
| <b>DLAT</b>       | 0.00  | 9.91E-01 | 1.00E+00 | -0.34 | 2.01E-01 | 7.53E-01 |
| <b>AC005244.1</b> | -0.39 | 9.10E-01 | 1.00E+00 | 0.88  | 2.01E-01 | 7.53E-01 |
| <b>LINC02323</b>  | 1.28  | 2.62E-01 | 1.00E+00 | 1.75  | 2.01E-01 | 7.53E-01 |
| <b>IPCEF1</b>     | -0.78 | 8.05E-02 | 1.00E+00 | 0.78  | 2.02E-01 | 7.53E-01 |
| <b>HLA-K</b>      | -0.02 | 9.71E-01 | 1.00E+00 | 0.73  | 2.02E-01 | 7.53E-01 |
| <b>ZNF646</b>     | -0.39 | 9.37E-02 | 1.00E+00 | 0.69  | 2.02E-01 | 7.53E-01 |

|            |       |          |          |       |          |          |
|------------|-------|----------|----------|-------|----------|----------|
| ZNF254     | -0.18 | 5.55E-01 | 1.00E+00 | -0.49 | 2.02E-01 | 7.53E-01 |
| CD40LG     | 0.21  | 7.98E-01 | 1.00E+00 | 1.29  | 2.02E-01 | 7.53E-01 |
| DLX1       | -0.53 | 5.44E-01 | 1.00E+00 | 1.16  | 2.02E-01 | 7.53E-01 |
| AC007182.2 | 0.37  | 9.14E-01 | 1.00E+00 | 0.91  | 2.02E-01 | 7.53E-01 |
| CMPK2      | -0.02 | 9.87E-01 | 1.00E+00 | 1.06  | 2.02E-01 | 7.53E-01 |
| PRKAR1A    | 0.23  | 3.42E-01 | 1.00E+00 | -0.32 | 2.02E-01 | 7.53E-01 |
| FAM21EP    | -0.39 | 5.98E-01 | 1.00E+00 | 0.72  | 2.02E-01 | 7.53E-01 |
| HPS5       | 0.47  | 1.36E-01 | 1.00E+00 | 0.33  | 2.02E-01 | 7.53E-01 |
| C14orf180  | 1.19  | 7.21E-01 | 1.00E+00 | -1.36 | 2.02E-01 | 7.53E-01 |
| KIF19      | -0.27 | 6.51E-01 | 1.00E+00 | 1.23  | 2.02E-01 | 7.54E-01 |
| TGFBR3     | 0.54  | 8.92E-02 | 1.00E+00 | -0.42 | 2.02E-01 | 7.54E-01 |
| SETX       | -0.04 | 8.10E-01 | 1.00E+00 | 0.36  | 2.02E-01 | 7.54E-01 |
| MFSD5      | -0.04 | 9.02E-01 | 1.00E+00 | -0.38 | 2.02E-01 | 7.54E-01 |
| AL391280.1 | 0.66  | 5.67E-01 | 1.00E+00 | 2.01  | 2.02E-01 | 7.55E-01 |
| APOBEC3D   | -0.87 | 6.03E-01 | 1.00E+00 | 1.00  | 2.02E-01 | 7.55E-01 |
| G22374     | -2.23 | 1.12E-01 | 1.00E+00 | 0.98  | 2.03E-01 | 7.55E-01 |
| HIST1H2AL  | -2.81 | 3.99E-01 | 1.00E+00 | -1.48 | 2.03E-01 | 7.55E-01 |
| SELP       | -0.49 | 3.87E-01 | 1.00E+00 | 0.75  | 2.03E-01 | 7.55E-01 |
| GRIA3      | 0.00  | 9.96E-01 | 1.00E+00 | 0.92  | 2.03E-01 | 7.55E-01 |
| SBDS       | 0.25  | 5.65E-02 | 1.00E+00 | -0.40 | 2.03E-01 | 7.55E-01 |
| PIGV       | 0.26  | 2.69E-01 | 1.00E+00 | -0.26 | 2.03E-01 | 7.55E-01 |
| C5orf34    | 0.11  | 7.94E-01 | 1.00E+00 | -0.69 | 2.03E-01 | 7.55E-01 |
| IGKV3-15   | 6.18  | 3.54E-06 | 1.17E-03 | 3.99  | 2.03E-01 | 7.55E-01 |
| MYCL       | 0.31  | 4.38E-01 | 1.00E+00 | -0.76 | 2.03E-01 | 7.56E-01 |
| ADAM17     | -0.06 | 7.79E-01 | 1.00E+00 | 0.49  | 2.03E-01 | 7.56E-01 |
| CBFA2T2    | -0.26 | 3.22E-01 | 1.00E+00 | -0.47 | 2.03E-01 | 7.56E-01 |
| AC024610.2 | 1.10  | 4.12E-01 | 1.00E+00 | 1.24  | 2.03E-01 | 7.56E-01 |
| PTOV1      | -0.21 | 4.72E-01 | 1.00E+00 | -0.50 | 2.03E-01 | 7.56E-01 |
| LRR6       | -0.51 | 2.87E-01 | 1.00E+00 | -0.57 | 2.03E-01 | 7.56E-01 |
| SIRPB1     | -1.01 | 2.93E-01 | 1.00E+00 | 1.18  | 2.03E-01 | 7.56E-01 |
| ALG9       | 0.64  | 3.93E-02 | 1.00E+00 | 0.44  | 2.03E-01 | 7.56E-01 |
| AL731563.3 | 0.46  | 7.59E-01 | 1.00E+00 | -1.29 | 2.03E-01 | 7.56E-01 |

|                    |       |          |          |       |          |          |
|--------------------|-------|----------|----------|-------|----------|----------|
| <b>PTBP2</b>       | 0.30  | 5.17E-01 | 1.00E+00 | -0.51 | 2.03E-01 | 7.56E-01 |
| <b>AC021106.3</b>  | 0.25  | 8.32E-01 | 1.00E+00 | 1.65  | 2.03E-01 | 7.56E-01 |
| <b>RCOR2</b>       | 0.17  | 8.07E-01 | 1.00E+00 | 1.25  | 2.03E-01 | 7.56E-01 |
| <b>LINC00445</b>   | 3.73  | 1.49E-01 | 1.00E+00 | -1.58 | 2.04E-01 | 7.56E-01 |
| <b>TRRAP</b>       | -0.10 | 7.32E-01 | 1.00E+00 | 0.67  | 2.04E-01 | 7.56E-01 |
| <b>GRIN3A</b>      | 0.51  | 3.96E-01 | 1.00E+00 | 1.05  | 2.04E-01 | 7.56E-01 |
| <b>DUSP1</b>       | -1.23 | 1.23E-01 | 1.00E+00 | -0.61 | 2.04E-01 | 7.56E-01 |
| <b>GTF2H2</b>      | 0.03  | 9.54E-01 | 1.00E+00 | -0.50 | 2.04E-01 | 7.56E-01 |
| <b>C11orf71</b>    | -0.09 | 6.93E-01 | 1.00E+00 | -0.57 | 2.04E-01 | 7.56E-01 |
| <b>XLOC_004673</b> | 0.34  | 5.17E-01 | 1.00E+00 | 1.41  | 2.04E-01 | 7.56E-01 |
| <b>PUS10</b>       | -0.27 | 3.43E-01 | 1.00E+00 | -0.34 | 2.04E-01 | 7.56E-01 |
| <b>TAPT1-AS1</b>   | 0.26  | 6.00E-01 | 1.00E+00 | -1.02 | 2.04E-01 | 7.56E-01 |
| <b>AL031985.3</b>  | -1.10 | 4.69E-02 | 1.00E+00 | 0.86  | 2.04E-01 | 7.56E-01 |
| <b>SNORD112</b>    | -0.39 | 8.96E-01 | 1.00E+00 | 1.30  | 2.04E-01 | 7.56E-01 |
| <b>STX4</b>        | -0.02 | 9.31E-01 | 1.00E+00 | 0.42  | 2.04E-01 | 7.56E-01 |
| <b>BRF2</b>        | 0.52  | 6.62E-02 | 1.00E+00 | 0.28  | 2.04E-01 | 7.56E-01 |
| <b>FAM122B</b>     | -0.25 | 2.10E-01 | 1.00E+00 | 0.33  | 2.04E-01 | 7.56E-01 |
| <b>MAPK7</b>       | -0.31 | 2.36E-01 | 1.00E+00 | 0.55  | 2.04E-01 | 7.56E-01 |
| <b>TRAV14DV4</b>   | -1.75 | 3.38E-01 | 1.00E+00 | 2.02  | 2.04E-01 | 7.56E-01 |
| <b>DCAKD</b>       | -0.08 | 7.61E-01 | 1.00E+00 | -0.41 | 2.04E-01 | 7.56E-01 |
| <b>TMOD1</b>       | -0.23 | 5.85E-01 | 1.00E+00 | -0.52 | 2.04E-01 | 7.56E-01 |
| <b>IGHV5-51</b>    | 1.29  | 3.73E-01 | 1.00E+00 | 4.01  | 2.04E-01 | 7.56E-01 |
| <b>ZNF529</b>      | 0.25  | 4.48E-01 | 1.00E+00 | -0.37 | 2.04E-01 | 7.56E-01 |
| <b>RABGAP1L</b>    | -0.01 | 9.45E-01 | 1.00E+00 | -0.25 | 2.04E-01 | 7.56E-01 |
| <b>FLT3LG</b>      | 3.28  | 1.10E-01 | 1.00E+00 | 1.15  | 2.04E-01 | 7.56E-01 |
| <b>MRPL39</b>      | 0.12  | 5.71E-01 | 1.00E+00 | -0.42 | 2.04E-01 | 7.56E-01 |
| <b>CNTN1</b>       | -0.69 | 1.65E-01 | 1.00E+00 | -0.66 | 2.04E-01 | 7.56E-01 |
| <b>LIMS1</b>       | 0.18  | 4.95E-01 | 1.00E+00 | 0.36  | 2.04E-01 | 7.56E-01 |
| <b>AC046143.1</b>  | 0.54  | 7.97E-01 | 1.00E+00 | 1.06  | 2.04E-01 | 7.56E-01 |
| <b>G4061</b>       | -1.05 | 3.08E-01 | 1.00E+00 | 1.61  | 2.04E-01 | 7.56E-01 |
| <b>CNOT8</b>       | 0.37  | 7.60E-02 | 1.00E+00 | -0.28 | 2.04E-01 | 7.56E-01 |
| <b>RPL6</b>        | -0.16 | 6.29E-01 | 1.00E+00 | 0.39  | 2.04E-01 | 7.56E-01 |

|            |       |          |          |       |          |          |
|------------|-------|----------|----------|-------|----------|----------|
| MRPS14     | 0.01  | 9.79E-01 | 1.00E+00 | -0.40 | 2.04E-01 | 7.56E-01 |
| POU2AF1    | 0.63  | 4.33E-01 | 1.00E+00 | 1.61  | 2.04E-01 | 7.56E-01 |
| ZFP28      | 0.28  | 2.99E-01 | 1.00E+00 | -0.56 | 2.04E-01 | 7.56E-01 |
| RPL11      | -0.05 | 8.72E-01 | 1.00E+00 | 0.39  | 2.05E-01 | 7.56E-01 |
| PML        | -0.36 | 3.42E-01 | 1.00E+00 | 0.66  | 2.05E-01 | 7.56E-01 |
| SHISA2     | -0.94 | 9.03E-02 | 1.00E+00 | 0.66  | 2.05E-01 | 7.56E-01 |
| ATP5MD     | 0.24  | 1.87E-01 | 1.00E+00 | -0.47 | 2.05E-01 | 7.56E-01 |
| AC112484.1 | 0.57  | 6.20E-01 | 1.00E+00 | 1.04  | 2.05E-01 | 7.56E-01 |
| AC017071.1 | -0.47 | 7.10E-01 | 1.00E+00 | 1.12  | 2.05E-01 | 7.56E-01 |
| FAM124A    | -0.21 | 5.33E-01 | 1.00E+00 | 0.83  | 2.05E-01 | 7.56E-01 |
| LASP1      | 0.25  | 3.73E-01 | 1.00E+00 | 0.64  | 2.05E-01 | 7.56E-01 |
| NIPSNAP3A  | 0.12  | 6.49E-01 | 1.00E+00 | -0.42 | 2.05E-01 | 7.56E-01 |
| AMPD3      | -0.03 | 9.44E-01 | 1.00E+00 | 0.45  | 2.05E-01 | 7.56E-01 |
| AC064875.1 | -1.19 | 7.28E-01 | 1.00E+00 | 1.64  | 2.05E-01 | 7.57E-01 |
| FA2H       | -0.13 | 7.68E-01 | 1.00E+00 | -1.09 | 2.05E-01 | 7.57E-01 |
| ARL5A      | 0.08  | 8.53E-01 | 1.00E+00 | -0.51 | 2.05E-01 | 7.57E-01 |
| KRT8P39    | -1.38 | 5.61E-01 | 1.00E+00 | -1.85 | 2.05E-01 | 7.57E-01 |
| ADAMTS7P4  | -0.24 | 8.41E-01 | 1.00E+00 | 1.27  | 2.05E-01 | 7.57E-01 |
| PAPSS2     | 0.26  | 5.92E-01 | 1.00E+00 | 0.68  | 2.05E-01 | 7.57E-01 |
| S100A1     | 0.41  | 7.73E-01 | 1.00E+00 | -0.88 | 2.05E-01 | 7.57E-01 |
| CDC16      | 0.03  | 8.57E-01 | 1.00E+00 | -0.37 | 2.05E-01 | 7.57E-01 |
| WFIKKN1    | -1.19 | 7.89E-03 | 5.46E-01 | -1.32 | 2.05E-01 | 7.57E-01 |
| TPP1       | 0.27  | 3.57E-01 | 1.00E+00 | 0.28  | 2.05E-01 | 7.57E-01 |
| PPIA       | 0.05  | 8.01E-01 | 1.00E+00 | -0.31 | 2.05E-01 | 7.57E-01 |
| EEF1AKMT2  | 0.13  | 7.15E-01 | 1.00E+00 | -0.65 | 2.05E-01 | 7.57E-01 |
| HLA-DPA3   | -0.80 | 8.18E-01 | 1.00E+00 | 3.00  | 2.05E-01 | 7.57E-01 |
| AC093827.5 | -0.70 | 6.98E-01 | 1.00E+00 | -0.86 | 2.05E-01 | 7.57E-01 |
| ITPR1      | 0.36  | 5.47E-01 | 1.00E+00 | 0.60  | 2.05E-01 | 7.57E-01 |
| HERC1      | 0.18  | 5.32E-01 | 1.00E+00 | 0.31  | 2.05E-01 | 7.57E-01 |
| ZNF541     | 0.24  | 7.79E-01 | 1.00E+00 | -0.93 | 2.06E-01 | 7.58E-01 |
| AC037198.1 | 0.00  | 9.99E-01 | 1.00E+00 | 1.38  | 2.06E-01 | 7.58E-01 |
| MBNL1-AS1  | -0.22 | 6.53E-01 | 1.00E+00 | 0.53  | 2.06E-01 | 7.58E-01 |

|                   |       |          |          |       |          |          |
|-------------------|-------|----------|----------|-------|----------|----------|
| <b>PIGP</b>       | 0.21  | 5.18E-01 | 1.00E+00 | -0.51 | 2.06E-01 | 7.58E-01 |
| <b>LINC01481</b>  | -0.62 | 3.91E-01 | 1.00E+00 | -0.80 | 2.06E-01 | 7.58E-01 |
| <b>AC068205.2</b> | -0.21 | 9.35E-01 | 1.00E+00 | -2.56 | 2.06E-01 | 7.58E-01 |
| <b>ORC1</b>       | -0.58 | 8.79E-02 | 1.00E+00 | 0.64  | 2.06E-01 | 7.58E-01 |
| <b>RRN3</b>       | 0.22  | 2.29E-01 | 1.00E+00 | -0.28 | 2.06E-01 | 7.58E-01 |
| <b>RFXAP</b>      | 0.04  | 9.07E-01 | 1.00E+00 | -0.77 | 2.06E-01 | 7.58E-01 |
| <b>ADGRE5</b>     | 0.17  | 6.12E-01 | 1.00E+00 | 0.73  | 2.06E-01 | 7.58E-01 |
| <b>ERG</b>        | 0.29  | 5.38E-01 | 1.00E+00 | 0.59  | 2.06E-01 | 7.58E-01 |
| <b>TEX26</b>      | 0.56  | 8.71E-01 | 1.00E+00 | -1.83 | 2.06E-01 | 7.58E-01 |
| <b>PGLS</b>       | -0.08 | 7.34E-01 | 1.00E+00 | 0.21  | 2.06E-01 | 7.58E-01 |
| <b>SLC4A9</b>     | -0.80 | 8.18E-01 | 1.00E+00 | -1.96 | 2.06E-01 | 7.58E-01 |
| <b>AC021752.1</b> | 0.44  | 6.56E-01 | 1.00E+00 | -0.95 | 2.06E-01 | 7.58E-01 |
| <b>FBXL5</b>      | 0.17  | 5.11E-01 | 1.00E+00 | -0.41 | 2.06E-01 | 7.58E-01 |
| <b>SYNE4</b>      | 0.45  | 4.00E-01 | 1.00E+00 | -0.86 | 2.06E-01 | 7.58E-01 |
| <b>EMC3</b>       | 0.03  | 8.53E-01 | 1.00E+00 | -0.29 | 2.06E-01 | 7.58E-01 |
| <b>HSPA8P1</b>    | NA    | NA       | NA       | 1.13  | 2.06E-01 | 7.58E-01 |
| <b>COX7B</b>      | 0.02  | 9.18E-01 | 1.00E+00 | -0.52 | 2.06E-01 | 7.58E-01 |
| <b>ARHGAP15</b>   | 0.43  | 3.25E-01 | 1.00E+00 | 0.41  | 2.06E-01 | 7.58E-01 |
| <b>PLEC</b>       | -0.47 | 1.66E-01 | 1.00E+00 | 0.88  | 2.06E-01 | 7.58E-01 |
| <b>AC012442.2</b> | 0.93  | 3.69E-01 | 1.00E+00 | -0.93 | 2.06E-01 | 7.58E-01 |
| <b>AC026471.4</b> | -0.29 | 7.24E-01 | 1.00E+00 | -0.54 | 2.06E-01 | 7.58E-01 |
| <b>AL353593.2</b> | 1.42  | 2.89E-01 | 1.00E+00 | -1.44 | 2.07E-01 | 7.58E-01 |
| <b>GFPT2</b>      | 0.41  | 4.01E-01 | 1.00E+00 | 0.77  | 2.07E-01 | 7.58E-01 |
| <b>EPRS</b>       | -0.29 | 1.13E-01 | 1.00E+00 | 0.18  | 2.07E-01 | 7.58E-01 |
| <b>AC010326.3</b> | -1.24 | 8.68E-02 | 1.00E+00 | 0.83  | 2.07E-01 | 7.58E-01 |
| <b>CTU2</b>       | -0.20 | 5.54E-01 | 1.00E+00 | 0.36  | 2.07E-01 | 7.58E-01 |
| <b>ZNF491</b>     | 0.21  | 7.56E-01 | 1.00E+00 | -0.97 | 2.07E-01 | 7.58E-01 |
| <b>FBLN1</b>      | 0.78  | 1.61E-01 | 1.00E+00 | 0.65  | 2.07E-01 | 7.58E-01 |
| <b>EXOC6</b>      | 0.00  | 9.90E-01 | 1.00E+00 | -0.30 | 2.07E-01 | 7.58E-01 |
| <b>C19orf73</b>   | -0.34 | 5.06E-01 | 1.00E+00 | -0.55 | 2.07E-01 | 7.58E-01 |
| <b>GVQW3</b>      | 0.13  | 8.57E-01 | 1.00E+00 | -0.91 | 2.07E-01 | 7.58E-01 |
| <b>SH2B1</b>      | -0.20 | 3.81E-01 | 1.00E+00 | 0.72  | 2.07E-01 | 7.58E-01 |

|             |       |          |          |       |          |          |
|-------------|-------|----------|----------|-------|----------|----------|
| GNB4        | 0.18  | 5.67E-01 | 1.00E+00 | -0.38 | 2.07E-01 | 7.58E-01 |
| SUOX        | 0.26  | 5.61E-01 | 1.00E+00 | -0.48 | 2.07E-01 | 7.58E-01 |
| GNB5        | 0.09  | 7.31E-01 | 1.00E+00 | 0.22  | 2.07E-01 | 7.58E-01 |
| TNMD        | 1.10  | 2.36E-01 | 1.00E+00 | -1.03 | 2.07E-01 | 7.58E-01 |
| MT-TL1      | 1.28  | 7.08E-01 | 1.00E+00 | -1.04 | 2.07E-01 | 7.58E-01 |
| ZNF354C     | 0.30  | 4.39E-01 | 1.00E+00 | 0.64  | 2.07E-01 | 7.58E-01 |
| PARD3       | 0.06  | 8.61E-01 | 1.00E+00 | -0.46 | 2.07E-01 | 7.58E-01 |
| AC104653.1  | -2.55 | 1.26E-01 | 1.00E+00 | -1.07 | 2.07E-01 | 7.59E-01 |
| AC124804.1  | -3.06 | 8.46E-03 | 5.67E-01 | -2.09 | 2.07E-01 | 7.59E-01 |
| TTC39A      | -0.34 | 5.43E-01 | 1.00E+00 | 0.62  | 2.07E-01 | 7.59E-01 |
| GNPAT       | 0.30  | 1.03E-01 | 1.00E+00 | -0.34 | 2.07E-01 | 7.59E-01 |
| TRAM2-AS1   | 0.04  | 9.02E-01 | 1.00E+00 | -0.68 | 2.07E-01 | 7.59E-01 |
| SBF1        | 0.09  | 7.45E-01 | 1.00E+00 | 0.73  | 2.08E-01 | 7.59E-01 |
| PTH2R       | 0.74  | 5.89E-01 | 1.00E+00 | -1.32 | 2.08E-01 | 7.59E-01 |
| KCNMB4      | -0.50 | 1.29E-01 | 1.00E+00 | -0.62 | 2.08E-01 | 7.59E-01 |
| CCDC146     | 0.57  | 1.64E-01 | 1.00E+00 | 0.49  | 2.08E-01 | 7.59E-01 |
| STRIP1      | -0.01 | 9.38E-01 | 1.00E+00 | 0.36  | 2.08E-01 | 7.59E-01 |
| KPNB1       | 0.10  | 5.48E-01 | 1.00E+00 | 0.39  | 2.08E-01 | 7.59E-01 |
| FAM45A      | 0.00  | 9.99E-01 | 1.00E+00 | -0.22 | 2.08E-01 | 7.59E-01 |
| AC025178.1  | 0.13  | 9.62E-01 | 1.00E+00 | 1.34  | 2.08E-01 | 7.59E-01 |
| XLOC_006348 | -2.16 | 5.28E-01 | 1.00E+00 | 2.40  | 2.08E-01 | 7.59E-01 |
| GJC1        | 0.06  | 8.63E-01 | 1.00E+00 | 0.79  | 2.08E-01 | 7.59E-01 |
| KCNQ3       | -0.21 | 7.53E-01 | 1.00E+00 | 0.91  | 2.08E-01 | 7.59E-01 |
| YWHAE       | 0.04  | 8.08E-01 | 1.00E+00 | -0.25 | 2.08E-01 | 7.59E-01 |
| AC105345.1  | 0.63  | 5.17E-01 | 1.00E+00 | 1.60  | 2.08E-01 | 7.60E-01 |
| GNRHR2      | -0.42 | 2.87E-01 | 1.00E+00 | 0.79  | 2.08E-01 | 7.60E-01 |
| AL031429.1  | 2.11  | 5.39E-01 | 1.00E+00 | -1.59 | 2.08E-01 | 7.60E-01 |
| PLPP5       | -0.41 | 7.95E-02 | 1.00E+00 | -0.33 | 2.08E-01 | 7.60E-01 |
| XLOC_008979 | 0.31  | 7.52E-01 | 1.00E+00 | 1.27  | 2.08E-01 | 7.60E-01 |
| PLA2G7      | 0.20  | 7.81E-01 | 1.00E+00 | 0.64  | 2.08E-01 | 7.60E-01 |
| ZNF90       | 0.09  | 8.85E-01 | 1.00E+00 | -0.72 | 2.08E-01 | 7.60E-01 |
| SQOR        | 0.12  | 6.22E-01 | 1.00E+00 | 0.29  | 2.08E-01 | 7.60E-01 |

|             |       |          |          |       |          |          |
|-------------|-------|----------|----------|-------|----------|----------|
| GRB2        | 0.04  | 8.16E-01 | 1.00E+00 | 0.37  | 2.08E-01 | 7.60E-01 |
| RPL10A      | -0.17 | 6.13E-01 | 1.00E+00 | 0.38  | 2.08E-01 | 7.60E-01 |
| SOS2        | 0.25  | 2.04E-01 | 1.00E+00 | -0.41 | 2.08E-01 | 7.60E-01 |
| HLA-J       | 0.16  | 9.47E-01 | 1.00E+00 | 0.80  | 2.09E-01 | 7.60E-01 |
| GJD3        | -0.81 | 2.77E-01 | 1.00E+00 | 1.44  | 2.09E-01 | 7.60E-01 |
| MFSD14B     | 0.36  | 1.24E-01 | 1.00E+00 | -0.48 | 2.09E-01 | 7.60E-01 |
| CFAP73      | -0.72 | 4.07E-01 | 1.00E+00 | -1.00 | 2.09E-01 | 7.60E-01 |
| USP38       | -0.07 | 8.24E-01 | 1.00E+00 | 0.32  | 2.09E-01 | 7.60E-01 |
| NDUFA12     | 0.11  | 6.14E-01 | 1.00E+00 | -0.53 | 2.09E-01 | 7.60E-01 |
| SUPT6H      | -0.13 | 5.05E-01 | 1.00E+00 | 0.55  | 2.09E-01 | 7.60E-01 |
| SORBS1      | 1.30  | 6.88E-02 | 1.00E+00 | -0.65 | 2.09E-01 | 7.60E-01 |
| TRGV5       | 2.54  | 2.57E-01 | 1.00E+00 | 1.60  | 2.09E-01 | 7.60E-01 |
| AC233976.1  | -0.34 | 8.98E-01 | 1.00E+00 | 2.09  | 2.09E-01 | 7.60E-01 |
| SPTY2D1     | 0.04  | 8.74E-01 | 1.00E+00 | 0.27  | 2.09E-01 | 7.60E-01 |
| AP000695.2  | -0.92 | 6.59E-01 | 1.00E+00 | 1.37  | 2.09E-01 | 7.60E-01 |
| DENND4A     | 0.09  | 6.77E-01 | 1.00E+00 | 0.44  | 2.09E-01 | 7.61E-01 |
| AL357568.2  | -1.65 | 6.32E-01 | 1.00E+00 | -2.14 | 2.09E-01 | 7.61E-01 |
| SLC12A7     | -0.42 | 3.00E-01 | 1.00E+00 | 0.82  | 2.09E-01 | 7.61E-01 |
| ZNF639      | 0.04  | 8.35E-01 | 1.00E+00 | -0.49 | 2.09E-01 | 7.61E-01 |
| AC137932.1  | 0.38  | 5.44E-01 | 1.00E+00 | 1.00  | 2.09E-01 | 7.61E-01 |
| ACSBG1      | -0.15 | 8.38E-01 | 1.00E+00 | -1.04 | 2.09E-01 | 7.61E-01 |
| TRAV16      | -2.36 | 3.87E-01 | 1.00E+00 | 1.66  | 2.09E-01 | 7.61E-01 |
| RASAL3      | -0.63 | 2.45E-01 | 1.00E+00 | 1.18  | 2.09E-01 | 7.61E-01 |
| AC004803.1  | -0.09 | 8.36E-01 | 1.00E+00 | -0.57 | 2.10E-01 | 7.61E-01 |
| VAV2        | 0.03  | 8.88E-01 | 1.00E+00 | 0.97  | 2.10E-01 | 7.61E-01 |
| G26223      | 1.76  | 9.11E-02 | 1.00E+00 | 1.56  | 2.10E-01 | 7.61E-01 |
| TALDO1      | 0.02  | 9.20E-01 | 1.00E+00 | -0.21 | 2.10E-01 | 7.61E-01 |
| STX1A       | -0.70 | 3.62E-01 | 1.00E+00 | 0.99  | 2.10E-01 | 7.61E-01 |
| CUEDC2      | -0.09 | 6.67E-01 | 1.00E+00 | 0.21  | 2.10E-01 | 7.61E-01 |
| BLOC1S5     | 0.42  | 7.84E-02 | 1.00E+00 | -0.32 | 2.10E-01 | 7.61E-01 |
| XLOC_012145 | 0.81  | 4.98E-01 | 1.00E+00 | 1.24  | 2.10E-01 | 7.61E-01 |
| RNF5        | 0.01  | 9.58E-01 | 1.00E+00 | -0.18 | 2.10E-01 | 7.61E-01 |



|                    |       |          |          |       |          |          |
|--------------------|-------|----------|----------|-------|----------|----------|
| <b>NPIP5</b>       | -0.02 | 9.72E-01 | 1.00E+00 | 0.65  | 2.10E-01 | 7.62E-01 |
| <b>HSPD1P10</b>    | -1.66 | 4.66E-01 | 1.00E+00 | -2.05 | 2.10E-01 | 7.62E-01 |
| <b>GDPGP1</b>      | 0.23  | 7.33E-01 | 1.00E+00 | -0.65 | 2.10E-01 | 7.62E-01 |
| <b>YTHDF3-AS1</b>  | 0.25  | 5.74E-01 | 1.00E+00 | -0.53 | 2.10E-01 | 7.62E-01 |
| <b>TMEM87A</b>     | 0.27  | 7.44E-02 | 1.00E+00 | -0.25 | 2.10E-01 | 7.62E-01 |
| <b>NCBP3</b>       | 0.12  | 5.64E-01 | 1.00E+00 | 0.35  | 2.10E-01 | 7.62E-01 |
| <b>TRAV4</b>       | 0.34  | 8.17E-01 | 1.00E+00 | 1.66  | 2.10E-01 | 7.62E-01 |
| <b>XLOC_001195</b> | 0.40  | 5.55E-01 | 1.00E+00 | 1.15  | 2.10E-01 | 7.62E-01 |
| <b>STK39</b>       | 0.15  | 7.95E-01 | 1.00E+00 | -0.56 | 2.10E-01 | 7.62E-01 |
| <b>HVCN1</b>       | 0.06  | 9.04E-01 | 1.00E+00 | 0.47  | 2.10E-01 | 7.62E-01 |
| <b>XLOC_007469</b> | -1.61 | 6.25E-01 | 1.00E+00 | -1.03 | 2.10E-01 | 7.62E-01 |
| <b>PSEN2</b>       | -0.06 | 7.33E-01 | 1.00E+00 | 0.31  | 2.10E-01 | 7.62E-01 |
| <b>PLA2G4D</b>     | 0.18  | 7.52E-01 | 1.00E+00 | 0.98  | 2.10E-01 | 7.62E-01 |
| <b>AC093827.4</b>  | 0.00  | 9.90E-01 | 1.00E+00 | 0.56  | 2.10E-01 | 7.62E-01 |
| <b>TMEM38B</b>     | 0.14  | 5.40E-01 | 1.00E+00 | -0.47 | 2.10E-01 | 7.62E-01 |
| <b>AC090970.2</b>  | -1.18 | 1.34E-01 | 1.00E+00 | -1.10 | 2.10E-01 | 7.62E-01 |
| <b>AC108471.2</b>  | -2.09 | 5.40E-01 | 1.00E+00 | -1.26 | 2.10E-01 | 7.62E-01 |
| <b>ACSS1</b>       | 0.02  | 9.10E-01 | 1.00E+00 | -0.69 | 2.11E-01 | 7.62E-01 |
| <b>HOXB9</b>       | -1.07 | 1.61E-01 | 1.00E+00 | 1.45  | 2.11E-01 | 7.62E-01 |
| <b>FAM189A2</b>    | 0.16  | 7.25E-01 | 1.00E+00 | -0.87 | 2.11E-01 | 7.62E-01 |
| <b>AL356317.1</b>  | -0.24 | 8.42E-01 | 1.00E+00 | -1.34 | 2.11E-01 | 7.62E-01 |
| <b>BCL2L2</b>      | 0.39  | 2.91E-02 | 9.89E-01 | 0.38  | 2.11E-01 | 7.62E-01 |
| <b>ARRB1</b>       | 0.27  | 3.18E-01 | 1.00E+00 | 0.36  | 2.11E-01 | 7.62E-01 |
| <b>TFDP2</b>       | 0.08  | 7.94E-01 | 1.00E+00 | -0.28 | 2.11E-01 | 7.62E-01 |
| <b>IFFO1</b>       | 0.11  | 7.80E-01 | 1.00E+00 | 0.95  | 2.11E-01 | 7.62E-01 |
| <b>FANCE</b>       | 0.12  | 7.04E-01 | 1.00E+00 | -0.50 | 2.11E-01 | 7.62E-01 |
| <b>MFSD10</b>      | -0.08 | 7.81E-01 | 1.00E+00 | 0.27  | 2.11E-01 | 7.62E-01 |
| <b>HLA-DRB9</b>    | -0.58 | 8.54E-01 | 1.00E+00 | 0.87  | 2.11E-01 | 7.62E-01 |
| <b>RUNX1T1</b>     | 0.49  | 3.72E-01 | 1.00E+00 | 0.54  | 2.11E-01 | 7.62E-01 |
| <b>FHL3</b>        | -0.28 | 3.53E-01 | 1.00E+00 | 0.38  | 2.11E-01 | 7.62E-01 |
| <b>GABPB1</b>      | -0.16 | 5.33E-01 | 1.00E+00 | -0.31 | 2.11E-01 | 7.62E-01 |
| <b>BFAR</b>        | 0.09  | 7.46E-01 | 1.00E+00 | 0.29  | 2.11E-01 | 7.62E-01 |

|                      |       |          |          |       |          |          |
|----------------------|-------|----------|----------|-------|----------|----------|
| <b>AC025175.1</b>    | 1.04  | 5.48E-02 | 1.00E+00 | -1.41 | 2.11E-01 | 7.62E-01 |
| <b>SCAND2P</b>       | 0.73  | 1.79E-01 | 1.00E+00 | 0.84  | 2.11E-01 | 7.62E-01 |
| <b>ALDH7A1P1</b>     | 0.43  | 8.27E-01 | 1.00E+00 | -0.81 | 2.11E-01 | 7.62E-01 |
| <b>NDUFS4</b>        | 0.08  | 7.01E-01 | 1.00E+00 | -0.36 | 2.11E-01 | 7.62E-01 |
| <b>XPO6</b>          | -0.13 | 4.57E-01 | 1.00E+00 | 0.65  | 2.11E-01 | 7.62E-01 |
| <b>DNM3OS</b>        | 0.45  | 3.65E-01 | 1.00E+00 | 0.53  | 2.11E-01 | 7.62E-01 |
| <b>TIMM23</b>        | -0.05 | 8.09E-01 | 1.00E+00 | -0.34 | 2.11E-01 | 7.62E-01 |
| <b>AC254562.3</b>    | -0.15 | 7.84E-01 | 1.00E+00 | 0.90  | 2.11E-01 | 7.62E-01 |
| <b>GPR12</b>         | 0.03  | 9.70E-01 | 1.00E+00 | -0.96 | 2.11E-01 | 7.62E-01 |
| <b>AC005332.6</b>    | 0.36  | 3.38E-01 | 1.00E+00 | 0.33  | 2.11E-01 | 7.62E-01 |
| <b>XLOC_002293</b>   | -0.03 | 9.77E-01 | 1.00E+00 | 0.96  | 2.11E-01 | 7.62E-01 |
| <b>AC078819.1</b>    | -0.70 | 3.30E-01 | 1.00E+00 | 0.69  | 2.11E-01 | 7.62E-01 |
| <b>P2RX5-TAX1BP3</b> | -0.22 | 6.45E-01 | 1.00E+00 | -0.88 | 2.11E-01 | 7.62E-01 |
| <b>FAM177A1</b>      | 0.04  | 8.37E-01 | 1.00E+00 | -0.34 | 2.11E-01 | 7.62E-01 |
| <b>TRBV6-1</b>       | -1.12 | 5.78E-01 | 1.00E+00 | 2.17  | 2.11E-01 | 7.62E-01 |
| <b>P2RX1</b>         | -0.80 | 3.10E-01 | 1.00E+00 | -0.94 | 2.11E-01 | 7.62E-01 |
| <b>ZNF322</b>        | 0.09  | 7.76E-01 | 1.00E+00 | 0.33  | 2.12E-01 | 7.62E-01 |
| <b>DNAH3</b>         | -0.37 | 4.94E-01 | 1.00E+00 | -0.59 | 2.12E-01 | 7.62E-01 |
| <b>BMS1P5</b>        | -0.93 | 4.04E-01 | 1.00E+00 | 0.97  | 2.12E-01 | 7.62E-01 |
| <b>CABP1</b>         | 0.72  | 5.10E-01 | 1.00E+00 | 0.91  | 2.12E-01 | 7.62E-01 |
| <b>ZNF333</b>        | 0.04  | 8.75E-01 | 1.00E+00 | 0.33  | 2.12E-01 | 7.62E-01 |
| <b>SLC22A31</b>      | 0.58  | 5.52E-01 | 1.00E+00 | -1.22 | 2.12E-01 | 7.62E-01 |
| <b>OSBPL1A</b>       | 0.08  | 7.91E-01 | 1.00E+00 | -0.42 | 2.12E-01 | 7.62E-01 |
| <b>HNRNPUL2</b>      | 0.10  | 6.13E-01 | 1.00E+00 | 0.58  | 2.12E-01 | 7.62E-01 |
| <b>MAPRE1</b>        | -0.01 | 9.64E-01 | 1.00E+00 | 0.23  | 2.12E-01 | 7.62E-01 |
| <b>PANK4</b>         | 0.02  | 9.13E-01 | 1.00E+00 | -0.30 | 2.12E-01 | 7.62E-01 |
| <b>FAM180B</b>       | 0.56  | 4.30E-01 | 1.00E+00 | 0.81  | 2.12E-01 | 7.62E-01 |
| <b>RP11-782C8.2</b>  | -2.14 | 2.00E-01 | 1.00E+00 | -1.08 | 2.12E-01 | 7.62E-01 |
| <b>ZBTB16</b>        | 0.39  | 7.25E-01 | 1.00E+00 | -0.83 | 2.12E-01 | 7.63E-01 |
| <b>CNR2</b>          | -2.47 | 4.70E-01 | 1.00E+00 | 2.14  | 2.12E-01 | 7.63E-01 |
| <b>AKR7A2</b>        | -0.11 | 6.31E-01 | 1.00E+00 | -0.22 | 2.12E-01 | 7.63E-01 |
| <b>AP001574.1</b>    | -1.39 | 2.07E-01 | 1.00E+00 | 0.74  | 2.12E-01 | 7.63E-01 |

|                     |       |          |          |       |          |          |
|---------------------|-------|----------|----------|-------|----------|----------|
| <b>AC015849.3</b>   | 0.85  | 3.07E-01 | 1.00E+00 | 1.19  | 2.12E-01 | 7.63E-01 |
| <b>FO393419.3</b>   | -1.68 | 3.87E-01 | 1.00E+00 | 1.20  | 2.12E-01 | 7.63E-01 |
| <b>SLC25A25-AS1</b> | -0.86 | 5.67E-02 | 1.00E+00 | 1.26  | 2.12E-01 | 7.63E-01 |
| <b>RINT1</b>        | 0.15  | 6.60E-01 | 1.00E+00 | 0.41  | 2.12E-01 | 7.63E-01 |
| <b>DIO3OS</b>       | 0.64  | 4.62E-01 | 1.00E+00 | 0.92  | 2.12E-01 | 7.63E-01 |
| <b>AC009053.2</b>   | 0.46  | 7.00E-01 | 1.00E+00 | -1.21 | 2.12E-01 | 7.63E-01 |
| <b>FAM161A</b>      | 0.14  | 6.96E-01 | 1.00E+00 | -0.60 | 2.13E-01 | 7.63E-01 |
| <b>G25496</b>       | -0.58 | 6.59E-01 | 1.00E+00 | -0.99 | 2.13E-01 | 7.63E-01 |
| <b>GCNT4</b>        | -0.28 | 5.63E-01 | 1.00E+00 | 0.51  | 2.13E-01 | 7.63E-01 |
| <b>FSTL1</b>        | 0.78  | 1.48E-01 | 1.00E+00 | 0.65  | 2.13E-01 | 7.63E-01 |
| <b>AC093827.3</b>   | 0.77  | 5.59E-01 | 1.00E+00 | 0.84  | 2.13E-01 | 7.63E-01 |
| <b>CACFD1</b>       | -0.35 | 1.80E-01 | 1.00E+00 | 0.64  | 2.13E-01 | 7.63E-01 |
| <b>HRNR</b>         | -1.78 | 9.61E-03 | 6.08E-01 | 3.91  | 2.13E-01 | 7.63E-01 |
| <b>ANKRD18B</b>     | 0.29  | 5.87E-01 | 1.00E+00 | -0.89 | 2.13E-01 | 7.63E-01 |
| <b>G31132</b>       | -2.77 | 1.40E-01 | 1.00E+00 | 0.85  | 2.13E-01 | 7.63E-01 |
| <b>FNDC3B</b>       | 0.31  | 4.32E-01 | 1.00E+00 | 0.39  | 2.13E-01 | 7.63E-01 |
| <b>HSD17B7</b>      | -0.14 | 7.06E-01 | 1.00E+00 | -0.44 | 2.13E-01 | 7.63E-01 |
| <b>B9D1</b>         | -0.31 | 4.23E-01 | 1.00E+00 | 0.35  | 2.13E-01 | 7.63E-01 |
| <b>AC006978.1</b>   | 0.05  | 8.52E-01 | 1.00E+00 | 0.56  | 2.13E-01 | 7.63E-01 |
| <b>HIST1H4K</b>     | 0.74  | 7.68E-01 | 1.00E+00 | 0.92  | 2.13E-01 | 7.63E-01 |
| <b>U91328.1</b>     | -0.08 | 8.44E-01 | 1.00E+00 | -0.64 | 2.13E-01 | 7.63E-01 |
| <b>NTAN1</b>        | 0.02  | 9.53E-01 | 1.00E+00 | -0.42 | 2.13E-01 | 7.63E-01 |
| <b>RNVU1-6</b>      | -0.50 | 7.49E-01 | 1.00E+00 | -1.02 | 2.13E-01 | 7.63E-01 |
| <b>COPRS</b>        | -0.16 | 6.01E-01 | 1.00E+00 | -0.83 | 2.13E-01 | 7.63E-01 |
| <b>COPS9</b>        | 0.02  | 8.76E-01 | 1.00E+00 | -0.49 | 2.13E-01 | 7.63E-01 |
| <b>AC008629.1</b>   | -2.86 | 9.24E-02 | 1.00E+00 | -1.00 | 2.13E-01 | 7.63E-01 |
| <b>ITPKB</b>        | 0.09  | 6.59E-01 | 1.00E+00 | 0.47  | 2.13E-01 | 7.63E-01 |
| <b>RHCG</b>         | -0.64 | 3.19E-01 | 1.00E+00 | 0.91  | 2.13E-01 | 7.63E-01 |
| <b>C3orf20</b>      | -0.73 | 3.65E-01 | 1.00E+00 | 2.08  | 2.13E-01 | 7.63E-01 |
| <b>INTU</b>         | 0.46  | 1.14E-01 | 1.00E+00 | -0.52 | 2.13E-01 | 7.63E-01 |
| <b>AC019069.1</b>   | 0.05  | 9.59E-01 | 1.00E+00 | 1.42  | 2.13E-01 | 7.64E-01 |
| <b>C8orf37-AS1</b>  | 0.17  | 9.06E-01 | 1.00E+00 | -0.96 | 2.13E-01 | 7.64E-01 |

|             |       |          |          |       |          |          |
|-------------|-------|----------|----------|-------|----------|----------|
| ACAT2       | -0.32 | 4.80E-01 | 1.00E+00 | -0.59 | 2.13E-01 | 7.64E-01 |
| EEF1A1P9    | 0.94  | 1.59E-01 | 1.00E+00 | -0.48 | 2.14E-01 | 7.64E-01 |
| NPM1P27     | -0.07 | 8.49E-01 | 1.00E+00 | -0.41 | 2.14E-01 | 7.64E-01 |
| COX6C       | 0.02  | 9.03E-01 | 1.00E+00 | -0.56 | 2.14E-01 | 7.64E-01 |
| AC246787.1  | 1.01  | 3.30E-01 | 1.00E+00 | -0.82 | 2.14E-01 | 7.64E-01 |
| HDAC1       | -0.16 | 4.73E-01 | 1.00E+00 | 0.23  | 2.14E-01 | 7.64E-01 |
| ZCWPW2      | -0.20 | 8.47E-01 | 1.00E+00 | -0.89 | 2.14E-01 | 7.64E-01 |
| XLOC_007562 | -2.86 | 4.00E-01 | 1.00E+00 | -2.27 | 2.14E-01 | 7.65E-01 |
| DRGX        | -0.18 | 8.64E-01 | 1.00E+00 | -1.49 | 2.14E-01 | 7.65E-01 |
| SLC26A2     | 0.33  | 5.99E-01 | 1.00E+00 | -0.59 | 2.14E-01 | 7.65E-01 |
| KIAA0355    | -0.01 | 9.25E-01 | 1.00E+00 | 0.42  | 2.14E-01 | 7.65E-01 |
| LINC01678   | -0.38 | 6.53E-01 | 1.00E+00 | 1.01  | 2.14E-01 | 7.65E-01 |
| KLHL11      | -0.59 | 4.70E-02 | 1.00E+00 | -0.87 | 2.14E-01 | 7.65E-01 |
| COL23A1     | 0.19  | 6.48E-01 | 1.00E+00 | 1.13  | 2.14E-01 | 7.65E-01 |
| GMCL1       | 0.41  | 4.08E-02 | 1.00E+00 | -0.34 | 2.14E-01 | 7.65E-01 |
| REXO1       | -0.80 | 2.14E-02 | 8.94E-01 | 0.96  | 2.14E-01 | 7.65E-01 |
| FAIM        | 0.32  | 2.98E-01 | 1.00E+00 | -0.39 | 2.14E-01 | 7.65E-01 |
| MSRB1       | -0.06 | 8.27E-01 | 1.00E+00 | -0.28 | 2.14E-01 | 7.65E-01 |
| DPY30       | 0.00  | 9.94E-01 | 1.00E+00 | -0.48 | 2.14E-01 | 7.65E-01 |
| LINC00205   | -0.46 | 1.99E-01 | 1.00E+00 | 0.61  | 2.14E-01 | 7.65E-01 |
| PPIP5K2     | 0.17  | 6.02E-01 | 1.00E+00 | -0.31 | 2.14E-01 | 7.65E-01 |
| BNIP3L      | 0.32  | 1.80E-01 | 1.00E+00 | -0.40 | 2.15E-01 | 7.65E-01 |
| UTP4        | 0.08  | 6.85E-01 | 1.00E+00 | -0.25 | 2.15E-01 | 7.65E-01 |
| ADRA2C      | -0.17 | 7.29E-01 | 1.00E+00 | -1.06 | 2.15E-01 | 7.65E-01 |
| SLC22A2     | -1.32 | 5.57E-01 | 1.00E+00 | 1.48  | 2.15E-01 | 7.65E-01 |
| SNTG2       | -0.07 | 8.82E-01 | 1.00E+00 | -1.18 | 2.15E-01 | 7.65E-01 |
| EPB41L4B    | 0.22  | 4.01E-01 | 1.00E+00 | -0.45 | 2.15E-01 | 7.65E-01 |
| ESCO2       | 0.24  | 6.48E-01 | 1.00E+00 | 0.71  | 2.15E-01 | 7.65E-01 |
| NDUFA6      | -0.10 | 5.97E-01 | 1.00E+00 | -0.39 | 2.15E-01 | 7.65E-01 |
| AC007249.2  | -0.70 | 3.41E-01 | 1.00E+00 | 0.96  | 2.15E-01 | 7.65E-01 |
| IRAK3       | 0.73  | 8.76E-02 | 1.00E+00 | 0.71  | 2.15E-01 | 7.65E-01 |
| CYB5B       | 0.08  | 6.57E-01 | 1.00E+00 | -0.32 | 2.15E-01 | 7.65E-01 |

|             |       |          |          |       |          |          |
|-------------|-------|----------|----------|-------|----------|----------|
| DCTN6       | 0.21  | 2.56E-01 | 1.00E+00 | -0.43 | 2.15E-01 | 7.65E-01 |
| XLOC_013986 | 0.05  | 9.65E-01 | 1.00E+00 | 0.93  | 2.15E-01 | 7.65E-01 |
| TEX101      | 0.20  | 8.27E-01 | 1.00E+00 | 1.30  | 2.15E-01 | 7.65E-01 |
| HEXIM1      | -0.08 | 6.62E-01 | 1.00E+00 | 0.40  | 2.15E-01 | 7.65E-01 |
| MORC4       | -0.23 | 2.10E-01 | 1.00E+00 | -0.43 | 2.15E-01 | 7.65E-01 |
| KLHL18      | 0.08  | 8.45E-01 | 1.00E+00 | 0.37  | 2.15E-01 | 7.65E-01 |
| OIP5-AS1    | -0.03 | 9.57E-01 | 1.00E+00 | -0.55 | 2.15E-01 | 7.65E-01 |
| HMGB1P6     | 0.56  | 4.62E-02 | 1.00E+00 | -0.40 | 2.15E-01 | 7.65E-01 |
| M6PR        | 0.07  | 7.69E-01 | 1.00E+00 | 0.24  | 2.15E-01 | 7.66E-01 |
| RARA        | -0.32 | 2.57E-01 | 1.00E+00 | 0.82  | 2.15E-01 | 7.66E-01 |
| MRFAP1      | 0.14  | 4.12E-01 | 1.00E+00 | 0.25  | 2.15E-01 | 7.66E-01 |
| PDCL3P4     | -0.50 | 7.47E-01 | 1.00E+00 | -0.81 | 2.15E-01 | 7.66E-01 |
| CEP250      | 0.00  | 9.95E-01 | 1.00E+00 | 0.63  | 2.15E-01 | 7.66E-01 |
| MED15       | -0.32 | 1.64E-01 | 1.00E+00 | 0.46  | 2.15E-01 | 7.66E-01 |
| DES         | -0.74 | 3.43E-01 | 1.00E+00 | -0.91 | 2.15E-01 | 7.66E-01 |
| C20orf204   | 0.07  | 8.80E-01 | 1.00E+00 | 1.04  | 2.16E-01 | 7.66E-01 |
| IGKV3-11    | 4.57  | 1.49E-02 | 7.62E-01 | 3.89  | 2.16E-01 | 7.66E-01 |
| KDM2B       | -0.26 | 4.54E-01 | 1.00E+00 | 0.42  | 2.16E-01 | 7.66E-01 |
| MYO5C       | 0.09  | 8.66E-01 | 1.00E+00 | -0.61 | 2.16E-01 | 7.66E-01 |
| NDUFB4P12   | NA    | NA       | NA       | -0.91 | 2.16E-01 | 7.66E-01 |
| SELENOS     | 0.09  | 6.44E-01 | 1.00E+00 | -0.34 | 2.16E-01 | 7.67E-01 |
| PRDX6       | 0.06  | 7.20E-01 | 1.00E+00 | -0.20 | 2.16E-01 | 7.67E-01 |
| WISP3       | 0.15  | 8.18E-01 | 1.00E+00 | 0.76  | 2.16E-01 | 7.67E-01 |
| MYH7        | 0.21  | 8.95E-01 | 1.00E+00 | 1.68  | 2.16E-01 | 7.67E-01 |
| AL592546.1  | -2.39 | 3.74E-01 | 1.00E+00 | 1.46  | 2.16E-01 | 7.67E-01 |
| KIF4A       | 0.23  | 4.09E-01 | 1.00E+00 | 0.53  | 2.16E-01 | 7.67E-01 |
| ZNF195      | 0.00  | 9.98E-01 | 1.00E+00 | -0.34 | 2.16E-01 | 7.67E-01 |
| LINC02019   | 0.14  | 8.77E-01 | 1.00E+00 | 0.81  | 2.16E-01 | 7.67E-01 |
| DUSP6       | 0.70  | 9.45E-02 | 1.00E+00 | 0.46  | 2.16E-01 | 7.67E-01 |
| CDS2        | 0.39  | 2.96E-01 | 1.00E+00 | 0.32  | 2.16E-01 | 7.67E-01 |
| CDK2AP1     | 0.08  | 7.12E-01 | 1.00E+00 | -0.66 | 2.16E-01 | 7.67E-01 |
| PDE7B       | 0.26  | 7.16E-01 | 1.00E+00 | 0.74  | 2.16E-01 | 7.67E-01 |

|                   |       |          |          |       |          |          |
|-------------------|-------|----------|----------|-------|----------|----------|
| <b>EMILIN2</b>    | 0.20  | 6.40E-01 | 1.00E+00 | 1.04  | 2.16E-01 | 7.67E-01 |
| <b>COMMD8</b>     | -0.06 | 8.32E-01 | 1.00E+00 | -0.53 | 2.16E-01 | 7.67E-01 |
| <b>G39823</b>     | -0.29 | 7.51E-01 | 1.00E+00 | -1.05 | 2.16E-01 | 7.67E-01 |
| <b>PLEKHA3</b>    | 0.38  | 2.40E-01 | 1.00E+00 | -0.43 | 2.17E-01 | 7.67E-01 |
| <b>TNFAIP3</b>    | -1.00 | 3.34E-01 | 1.00E+00 | 0.60  | 2.17E-01 | 7.67E-01 |
| <b>Z68871.1</b>   | -2.98 | 1.00E-02 | 6.22E-01 | 0.56  | 2.17E-01 | 7.67E-01 |
| <b>PRSS51</b>     | -0.52 | 5.78E-01 | 1.00E+00 | 1.90  | 2.17E-01 | 7.68E-01 |
| <b>CNTN3</b>      | 0.95  | 2.37E-02 | 9.15E-01 | 0.99  | 2.17E-01 | 7.68E-01 |
| <b>GNG11</b>      | 0.34  | 4.73E-01 | 1.00E+00 | -0.58 | 2.17E-01 | 7.68E-01 |
| <b>CYC1</b>       | -0.26 | 2.48E-01 | 1.00E+00 | -0.31 | 2.17E-01 | 7.68E-01 |
| <b>ARID3C</b>     | -1.02 | 1.80E-01 | 1.00E+00 | -1.16 | 2.17E-01 | 7.68E-01 |
| <b>AL022323.1</b> | -0.39 | 8.37E-01 | 1.00E+00 | -0.92 | 2.17E-01 | 7.68E-01 |
| <b>PPP2R5D</b>    | -0.02 | 8.87E-01 | 1.00E+00 | 0.36  | 2.17E-01 | 7.68E-01 |
| <b>ROMO1</b>      | -0.10 | 5.89E-01 | 1.00E+00 | -0.42 | 2.17E-01 | 7.68E-01 |
| <b>HMG3-AS1</b>   | 0.08  | 8.54E-01 | 1.00E+00 | 0.40  | 2.17E-01 | 7.68E-01 |
| <b>FRG1</b>       | -0.04 | 8.01E-01 | 1.00E+00 | -0.32 | 2.17E-01 | 7.68E-01 |
| <b>MEX3C</b>      | 0.13  | 5.70E-01 | 1.00E+00 | 0.49  | 2.17E-01 | 7.68E-01 |
| <b>C1orf158</b>   | -0.60 | 8.61E-01 | 1.00E+00 | -2.20 | 2.17E-01 | 7.68E-01 |
| <b>ITGB1BP1</b>   | 0.32  | 2.99E-01 | 1.00E+00 | -0.48 | 2.17E-01 | 7.68E-01 |
| <b>BCL2L11</b>    | -0.13 | 7.56E-01 | 1.00E+00 | 0.68  | 2.17E-01 | 7.68E-01 |
| <b>AC007728.2</b> | -2.97 | 7.46E-02 | 1.00E+00 | 1.44  | 2.18E-01 | 7.68E-01 |
| <b>AC022730.4</b> | -3.06 | 2.17E-01 | 1.00E+00 | 2.38  | 2.18E-01 | 7.68E-01 |
| <b>ARHGAP42</b>   | -0.08 | 7.74E-01 | 1.00E+00 | 0.40  | 2.18E-01 | 7.68E-01 |
| <b>LIMK2</b>      | -0.02 | 9.51E-01 | 1.00E+00 | 0.39  | 2.18E-01 | 7.68E-01 |
| <b>CDIPT</b>      | 0.17  | 3.78E-01 | 1.00E+00 | -0.59 | 2.18E-01 | 7.68E-01 |
| <b>CYB5R1</b>     | 0.13  | 6.10E-01 | 1.00E+00 | -0.32 | 2.18E-01 | 7.68E-01 |
| <b>PARP14</b>     | 0.07  | 8.91E-01 | 1.00E+00 | 0.65  | 2.18E-01 | 7.68E-01 |
| <b>AP000962.1</b> | 0.08  | 9.78E-01 | 1.00E+00 | -1.15 | 2.18E-01 | 7.68E-01 |
| <b>AZU1</b>       | -1.54 | 6.54E-01 | 1.00E+00 | 2.03  | 2.18E-01 | 7.68E-01 |
| <b>AL009178.2</b> | -0.60 | 3.91E-01 | 1.00E+00 | 1.43  | 2.18E-01 | 7.68E-01 |
| <b>MIPEP</b>      | -0.37 | 3.06E-01 | 1.00E+00 | -0.47 | 2.18E-01 | 7.68E-01 |
| <b>NAA30</b>      | 0.14  | 5.36E-01 | 1.00E+00 | -0.38 | 2.18E-01 | 7.68E-01 |

|                    |       |          |          |       |          |          |
|--------------------|-------|----------|----------|-------|----------|----------|
| <b>GNAZ</b>        | -0.18 | 7.41E-01 | 1.00E+00 | -0.83 | 2.18E-01 | 7.68E-01 |
| <b>HMG2N2P4</b>    | 0.94  | 7.83E-01 | 1.00E+00 | -0.54 | 2.18E-01 | 7.69E-01 |
| <b>MPPE1</b>       | 0.21  | 4.16E-01 | 1.00E+00 | 0.21  | 2.18E-01 | 7.69E-01 |
| <b>STK10</b>       | -0.18 | 5.94E-01 | 1.00E+00 | 0.66  | 2.18E-01 | 7.69E-01 |
| <b>CSNK2A1</b>     | 0.06  | 7.22E-01 | 1.00E+00 | 0.28  | 2.18E-01 | 7.69E-01 |
| <b>HILPDA</b>      | 0.32  | 4.61E-01 | 1.00E+00 | -0.42 | 2.18E-01 | 7.69E-01 |
| <b>G5109</b>       | 1.23  | 5.49E-01 | 1.00E+00 | -1.01 | 2.18E-01 | 7.69E-01 |
| <b>THEG</b>        | -1.24 | 1.23E-01 | 1.00E+00 | 0.71  | 2.18E-01 | 7.69E-01 |
| <b>JPH4</b>        | -0.98 | 6.85E-02 | 1.00E+00 | 0.91  | 2.18E-01 | 7.69E-01 |
| <b>XLOC_004398</b> | -2.13 | 5.36E-01 | 1.00E+00 | -3.25 | 2.18E-01 | 7.69E-01 |
| <b>CLIP3</b>       | 0.16  | 7.70E-01 | 1.00E+00 | 0.70  | 2.18E-01 | 7.69E-01 |
| <b>NOTCH1</b>      | -0.36 | 1.11E-01 | 1.00E+00 | 0.74  | 2.18E-01 | 7.69E-01 |
| <b>ZNF709</b>      | 1.34  | 6.97E-01 | 1.00E+00 | -1.03 | 2.18E-01 | 7.69E-01 |
| <b>CPNE3</b>       | 0.14  | 5.17E-01 | 1.00E+00 | -0.28 | 2.18E-01 | 7.69E-01 |
| <b>AC008267.3</b>  | 0.95  | 2.98E-01 | 1.00E+00 | 0.95  | 2.18E-01 | 7.69E-01 |
| <b>COX17</b>       | 0.18  | 5.26E-01 | 1.00E+00 | -0.53 | 2.19E-01 | 7.69E-01 |
| <b>PNPLA3</b>      | 0.91  | 6.74E-02 | 1.00E+00 | -0.67 | 2.19E-01 | 7.69E-01 |
| <b>HOXA2</b>       | 0.14  | 8.88E-01 | 1.00E+00 | -0.96 | 2.19E-01 | 7.69E-01 |
| <b>MAGIX</b>       | -0.14 | 7.11E-01 | 1.00E+00 | -0.53 | 2.19E-01 | 7.69E-01 |
| <b>ARPC1A</b>      | 0.38  | 1.31E-01 | 1.00E+00 | -0.55 | 2.19E-01 | 7.70E-01 |
| <b>ASB4</b>        | 0.32  | 6.86E-01 | 1.00E+00 | -1.49 | 2.19E-01 | 7.70E-01 |
| <b>TTC26</b>       | -0.28 | 4.20E-01 | 1.00E+00 | 0.36  | 2.19E-01 | 7.70E-01 |
| <b>CTBP2P8</b>     | -2.18 | 3.45E-01 | 1.00E+00 | -1.00 | 2.19E-01 | 7.70E-01 |
| <b>CISD2</b>       | 0.19  | 4.69E-01 | 1.00E+00 | -0.41 | 2.19E-01 | 7.70E-01 |
| <b>FRY</b>         | 0.07  | 7.18E-01 | 1.00E+00 | -0.42 | 2.19E-01 | 7.70E-01 |
| <b>HSPA6</b>       | -0.42 | 4.10E-01 | 1.00E+00 | 0.70  | 2.19E-01 | 7.70E-01 |
| <b>DSG3</b>        | -0.32 | 3.22E-01 | 1.00E+00 | 0.73  | 2.19E-01 | 7.70E-01 |
| <b>AC010531.6</b>  | 0.51  | 5.59E-01 | 1.00E+00 | -0.91 | 2.19E-01 | 7.70E-01 |
| <b>IRF2BPL</b>     | -0.07 | 7.97E-01 | 1.00E+00 | 0.68  | 2.19E-01 | 7.70E-01 |
| <b>CLDN15</b>      | 0.08  | 8.04E-01 | 1.00E+00 | 0.59  | 2.19E-01 | 7.70E-01 |
| <b>LINC01778</b>   | 1.11  | 6.06E-01 | 1.00E+00 | -0.99 | 2.19E-01 | 7.70E-01 |
| <b>PQBP1</b>       | -0.25 | 1.49E-01 | 1.00E+00 | 0.24  | 2.19E-01 | 7.70E-01 |

|             |       |          |          |       |          |          |
|-------------|-------|----------|----------|-------|----------|----------|
| LPCAT2      | -0.17 | 4.84E-01 | 1.00E+00 | -0.18 | 2.19E-01 | 7.70E-01 |
| NPY5R       | 0.93  | 2.58E-01 | 1.00E+00 | -0.75 | 2.19E-01 | 7.70E-01 |
| PPM1L       | -0.20 | 2.59E-01 | 1.00E+00 | -0.38 | 2.19E-01 | 7.70E-01 |
| TUBB2B      | -0.56 | 3.98E-01 | 1.00E+00 | 0.61  | 2.19E-01 | 7.70E-01 |
| AL356481.1  | -0.90 | 8.68E-02 | 1.00E+00 | -0.69 | 2.19E-01 | 7.70E-01 |
| TMIGD3      | 0.14  | 8.35E-01 | 1.00E+00 | 1.29  | 2.20E-01 | 7.70E-01 |
| MRPL43      | -0.15 | 4.39E-01 | 1.00E+00 | -0.19 | 2.20E-01 | 7.70E-01 |
| SHH         | -3.40 | 3.42E-02 | 1.00E+00 | -1.45 | 2.20E-01 | 7.70E-01 |
| KCNAB1      | 0.08  | 9.12E-01 | 1.00E+00 | -0.70 | 2.20E-01 | 7.70E-01 |
| G12163      | -1.43 | 7.46E-02 | 1.00E+00 | -1.01 | 2.20E-01 | 7.71E-01 |
| RMRP        | 0.02  | 9.67E-01 | 1.00E+00 | 0.88  | 2.20E-01 | 7.71E-01 |
| WDR13       | -0.08 | 7.44E-01 | 1.00E+00 | 0.22  | 2.20E-01 | 7.71E-01 |
| CCDC59      | -0.10 | 5.44E-01 | 1.00E+00 | -0.29 | 2.20E-01 | 7.71E-01 |
| AC011487.2  | 1.20  | 7.22E-01 | 1.00E+00 | 1.80  | 2.20E-01 | 7.71E-01 |
| AC083855.2  | 0.73  | 5.91E-02 | 1.00E+00 | 0.46  | 2.20E-01 | 7.71E-01 |
| WDR31       | -0.01 | 9.65E-01 | 1.00E+00 | -0.63 | 2.20E-01 | 7.71E-01 |
| XLOC_005587 | 0.73  | 1.49E-01 | 1.00E+00 | 0.71  | 2.20E-01 | 7.71E-01 |
| FAM209B     | 1.03  | 5.60E-01 | 1.00E+00 | 1.00  | 2.20E-01 | 7.71E-01 |
| AC011632.2  | -3.09 | 6.86E-02 | 1.00E+00 | -1.34 | 2.20E-01 | 7.71E-01 |
| NROB1       | 0.76  | 7.85E-01 | 1.00E+00 | -2.42 | 2.20E-01 | 7.71E-01 |
| GNA15       | 0.11  | 8.01E-01 | 1.00E+00 | 0.59  | 2.20E-01 | 7.71E-01 |
| ANKRD52     | -0.12 | 6.68E-01 | 1.00E+00 | 0.83  | 2.20E-01 | 7.71E-01 |
| SHROOM4     | -0.03 | 9.29E-01 | 1.00E+00 | 0.71  | 2.20E-01 | 7.71E-01 |
| BX322234.1  | -0.39 | 3.45E-01 | 1.00E+00 | 0.77  | 2.20E-01 | 7.71E-01 |
| XLOC_006390 | 0.50  | 5.58E-01 | 1.00E+00 | 1.17  | 2.20E-01 | 7.71E-01 |
| HoxA6       | -1.00 | 1.11E-01 | 1.00E+00 | -0.59 | 2.20E-01 | 7.71E-01 |
| NCS1        | -0.15 | 6.69E-01 | 1.00E+00 | -0.61 | 2.20E-01 | 7.71E-01 |
| SV2A        | -0.67 | 3.28E-01 | 1.00E+00 | 1.13  | 2.20E-01 | 7.71E-01 |
| AC092123.1  | -3.78 | 4.07E-02 | 1.00E+00 | -0.93 | 2.21E-01 | 7.71E-01 |
| MICALL1     | -0.29 | 3.98E-01 | 1.00E+00 | 0.75  | 2.21E-01 | 7.71E-01 |
| WDR81       | -0.27 | 2.31E-01 | 1.00E+00 | 0.80  | 2.21E-01 | 7.71E-01 |
| CECR7       | -0.55 | 2.26E-01 | 1.00E+00 | -0.43 | 2.21E-01 | 7.71E-01 |



|                    |       |          |          |       |          |          |
|--------------------|-------|----------|----------|-------|----------|----------|
| <b>RPS15</b>       | -0.10 | 7.02E-01 | 1.00E+00 | 0.36  | 2.21E-01 | 7.71E-01 |
| <b>ARMC5</b>       | -0.25 | 3.80E-01 | 1.00E+00 | 0.59  | 2.21E-01 | 7.71E-01 |
| <b>SH2D1A</b>      | -0.63 | 5.48E-01 | 1.00E+00 | 1.04  | 2.21E-01 | 7.71E-01 |
| <b>PIP</b>         | -0.83 | 6.20E-01 | 1.00E+00 | -3.83 | 2.21E-01 | 7.71E-01 |
| <b>XLOC_011981</b> | 0.81  | 7.11E-01 | 1.00E+00 | 1.75  | 2.21E-01 | 7.72E-01 |
| <b>IFITM10</b>     | -0.65 | 1.84E-01 | 1.00E+00 | 1.06  | 2.21E-01 | 7.72E-01 |
| <b>RPP14</b>       | 0.16  | 5.13E-01 | 1.00E+00 | 0.31  | 2.21E-01 | 7.72E-01 |
| <b>LINC01352</b>   | 1.46  | 3.22E-02 | 1.00E+00 | 1.16  | 2.21E-01 | 7.72E-01 |
| <b>MFAP3</b>       | 0.18  | 4.60E-01 | 1.00E+00 | 0.31  | 2.21E-01 | 7.72E-01 |
| <b>TMEM63A</b>     | 0.01  | 9.75E-01 | 1.00E+00 | 0.56  | 2.21E-01 | 7.72E-01 |
| <b>KDM4A</b>       | 0.14  | 4.65E-01 | 1.00E+00 | 0.47  | 2.21E-01 | 7.72E-01 |
| <b>MSRB2</b>       | 0.24  | 5.76E-01 | 1.00E+00 | -0.82 | 2.21E-01 | 7.72E-01 |
| <b>RPS4Y1</b>      | 1.03  | 6.28E-01 | 1.00E+00 | -2.52 | 2.21E-01 | 7.72E-01 |
| <b>TECPR2</b>      | -0.12 | 5.26E-01 | 1.00E+00 | 0.65  | 2.21E-01 | 7.72E-01 |
| <b>AL354732.1</b>  | -1.54 | 3.95E-01 | 1.00E+00 | 1.92  | 2.21E-01 | 7.72E-01 |
| <b>AL139339.1</b>  | -0.75 | 4.69E-01 | 1.00E+00 | 1.12  | 2.21E-01 | 7.72E-01 |
| <b>C1QTNF12</b>    | -1.00 | 4.88E-02 | 1.00E+00 | -0.89 | 2.21E-01 | 7.72E-01 |
| <b>AC096677.1</b>  | -0.43 | 6.38E-01 | 1.00E+00 | -0.65 | 2.21E-01 | 7.72E-01 |
| <b>TMEM120A</b>    | 0.14  | 5.22E-01 | 1.00E+00 | -0.29 | 2.21E-01 | 7.72E-01 |
| <b>AL121987.1</b>  | 0.70  | 7.32E-01 | 1.00E+00 | -1.50 | 2.21E-01 | 7.72E-01 |
| <b>C9orf24</b>     | -0.33 | 7.14E-01 | 1.00E+00 | -0.75 | 2.21E-01 | 7.72E-01 |
| <b>XLOC_007131</b> | NA    | NA       | NA       | -2.23 | 2.21E-01 | 7.72E-01 |
| <b>AP001189.3</b>  | -0.26 | 6.00E-01 | 1.00E+00 | 1.39  | 2.22E-01 | 7.72E-01 |
| <b>CAND1</b>       | 0.00  | 9.86E-01 | 1.00E+00 | -0.24 | 2.22E-01 | 7.72E-01 |
| <b>CDK20</b>       | -0.28 | 3.13E-01 | 1.00E+00 | 0.42  | 2.22E-01 | 7.72E-01 |
| <b>G28650</b>      | 0.30  | 7.58E-01 | 1.00E+00 | -1.21 | 2.22E-01 | 7.72E-01 |
| <b>MIR4292</b>     | -0.83 | 4.06E-01 | 1.00E+00 | 2.31  | 2.22E-01 | 7.72E-01 |
| <b>JCAD</b>        | 0.14  | 7.73E-01 | 1.00E+00 | 0.77  | 2.22E-01 | 7.72E-01 |
| <b>SNHG15</b>      | -0.33 | 4.10E-01 | 1.00E+00 | 0.34  | 2.22E-01 | 7.72E-01 |
| <b>MTMR14</b>      | 0.05  | 7.77E-01 | 1.00E+00 | 0.23  | 2.22E-01 | 7.72E-01 |
| <b>SMIM2-AS1</b>   | 0.55  | 5.64E-01 | 1.00E+00 | -0.81 | 2.22E-01 | 7.72E-01 |
| <b>ZNF433-AS1</b>  | -0.83 | 2.18E-01 | 1.00E+00 | -0.65 | 2.22E-01 | 7.72E-01 |

|            |       |          |          |       |          |          |
|------------|-------|----------|----------|-------|----------|----------|
| LINC01410  | -0.50 | 4.49E-01 | 1.00E+00 | 0.80  | 2.22E-01 | 7.72E-01 |
| KCTD11     | -0.34 | 5.25E-01 | 1.00E+00 | 0.57  | 2.22E-01 | 7.72E-01 |
| TBC1D4     | 0.02  | 9.06E-01 | 1.00E+00 | -0.30 | 2.22E-01 | 7.72E-01 |
| UGP2       | 0.49  | 2.08E-01 | 1.00E+00 | -0.37 | 2.22E-01 | 7.72E-01 |
| APCDD1     | -0.10 | 7.44E-01 | 1.00E+00 | -0.54 | 2.22E-01 | 7.72E-01 |
| ARFIP2     | -0.10 | 5.31E-01 | 1.00E+00 | 0.16  | 2.22E-01 | 7.72E-01 |
| IGBP1      | 0.02  | 9.31E-01 | 1.00E+00 | 0.26  | 2.22E-01 | 7.72E-01 |
| HOXC-AS1   | -0.50 | 3.58E-01 | 1.00E+00 | -0.73 | 2.22E-01 | 7.73E-01 |
| REXO5      | 0.26  | 4.09E-01 | 1.00E+00 | -0.43 | 2.22E-01 | 7.73E-01 |
| CNIH4      | 0.26  | 2.46E-01 | 1.00E+00 | -0.51 | 2.22E-01 | 7.73E-01 |
| RFC1       | 0.11  | 5.28E-01 | 1.00E+00 | -0.22 | 2.22E-01 | 7.73E-01 |
| CARS2      | 0.04  | 8.79E-01 | 1.00E+00 | -0.59 | 2.22E-01 | 7.73E-01 |
| BBS9       | 0.25  | 2.71E-01 | 1.00E+00 | -0.25 | 2.22E-01 | 7.73E-01 |
| GAREM2     | -0.68 | 1.14E-01 | 1.00E+00 | 0.59  | 2.22E-01 | 7.73E-01 |
| MCOLN1     | -0.26 | 2.42E-01 | 1.00E+00 | 0.23  | 2.23E-01 | 7.73E-01 |
| IRGQ       | 0.28  | 4.77E-01 | 1.00E+00 | -0.27 | 2.23E-01 | 7.73E-01 |
| HS2ST1     | 0.09  | 6.78E-01 | 1.00E+00 | 0.33  | 2.23E-01 | 7.73E-01 |
| SLC18A2    | -0.09 | 8.87E-01 | 1.00E+00 | -0.60 | 2.23E-01 | 7.73E-01 |
| MSL1       | -0.17 | 5.32E-01 | 1.00E+00 | 0.59  | 2.23E-01 | 7.73E-01 |
| AC011468.4 | 0.70  | 7.48E-01 | 1.00E+00 | 1.57  | 2.23E-01 | 7.74E-01 |
| FCHO2      | 0.04  | 8.59E-01 | 1.00E+00 | 0.23  | 2.23E-01 | 7.74E-01 |
| RAD21-AS1  | -0.07 | 8.99E-01 | 1.00E+00 | 0.94  | 2.23E-01 | 7.74E-01 |
| SAP30      | 0.15  | 6.29E-01 | 1.00E+00 | -0.81 | 2.23E-01 | 7.74E-01 |
| YIPF5      | 0.08  | 6.19E-01 | 1.00E+00 | -0.23 | 2.23E-01 | 7.74E-01 |
| RNASEH2B   | 0.03  | 9.07E-01 | 1.00E+00 | -0.29 | 2.23E-01 | 7.74E-01 |
| TENT5B     | -0.59 | 2.12E-01 | 1.00E+00 | -0.70 | 2.23E-01 | 7.74E-01 |
| ABCA5      | 0.14  | 5.79E-01 | 1.00E+00 | -0.34 | 2.23E-01 | 7.74E-01 |
| INTS4      | -0.19 | 4.24E-01 | 1.00E+00 | -0.21 | 2.23E-01 | 7.74E-01 |
| BCKDHB     | -0.33 | 1.90E-01 | 1.00E+00 | -0.42 | 2.23E-01 | 7.74E-01 |
| SPIN4      | -0.26 | 5.37E-01 | 1.00E+00 | 0.46  | 2.23E-01 | 7.74E-01 |
| ADCY3      | 0.05  | 8.04E-01 | 1.00E+00 | 0.79  | 2.23E-01 | 7.74E-01 |
| NDRG1      | 0.10  | 6.81E-01 | 1.00E+00 | 0.61  | 2.23E-01 | 7.74E-01 |

|                    |       |          |          |       |          |          |
|--------------------|-------|----------|----------|-------|----------|----------|
| <b>SUMO3</b>       | 0.15  | 3.65E-01 | 1.00E+00 | 0.20  | 2.23E-01 | 7.74E-01 |
| <b>SP140L</b>      | -0.08 | 8.76E-01 | 1.00E+00 | 0.76  | 2.24E-01 | 7.74E-01 |
| <b>PCDHB2</b>      | -0.01 | 9.80E-01 | 1.00E+00 | -0.60 | 2.24E-01 | 7.74E-01 |
| <b>ATAT1</b>       | -0.04 | 9.28E-01 | 1.00E+00 | 0.57  | 2.24E-01 | 7.74E-01 |
| <b>C8orf37</b>     | -0.67 | 4.12E-02 | 1.00E+00 | -0.57 | 2.24E-01 | 7.74E-01 |
| <b>CNOT11</b>      | -0.04 | 8.68E-01 | 1.00E+00 | -0.58 | 2.24E-01 | 7.74E-01 |
| <b>GPR61</b>       | -1.22 | 2.08E-01 | 1.00E+00 | -1.11 | 2.24E-01 | 7.74E-01 |
| <b>AP001528.3</b>  | 1.44  | 2.52E-01 | 1.00E+00 | -0.79 | 2.24E-01 | 7.74E-01 |
| <b>POLR3GL</b>     | 0.10  | 7.22E-01 | 1.00E+00 | -0.40 | 2.24E-01 | 7.74E-01 |
| <b>SH3BGRL</b>     | -0.11 | 5.61E-01 | 1.00E+00 | -0.27 | 2.24E-01 | 7.74E-01 |
| <b>XLOC_013570</b> | -1.39 | 4.66E-01 | 1.00E+00 | 1.77  | 2.24E-01 | 7.74E-01 |
| <b>COMMD6</b>      | 0.08  | 7.28E-01 | 1.00E+00 | -0.56 | 2.24E-01 | 7.74E-01 |
| <b>G35951</b>      | -0.82 | 4.77E-01 | 1.00E+00 | -1.21 | 2.24E-01 | 7.74E-01 |
| <b>PIN4</b>        | -0.05 | 7.96E-01 | 1.00E+00 | -0.35 | 2.24E-01 | 7.74E-01 |
| <b>OR3A2</b>       | -0.15 | 9.67E-01 | 1.00E+00 | -2.99 | 2.24E-01 | 7.74E-01 |
| <b>SRI</b>         | 0.17  | 4.29E-01 | 1.00E+00 | -0.44 | 2.24E-01 | 7.74E-01 |
| <b>ALMS1P1</b>     | -2.14 | 2.49E-01 | 1.00E+00 | 1.71  | 2.24E-01 | 7.74E-01 |
| <b>G32308</b>      | -2.93 | 3.88E-01 | 1.00E+00 | 2.62  | 2.24E-01 | 7.74E-01 |
| <b>MROH8</b>       | 0.39  | 4.95E-01 | 1.00E+00 | -0.55 | 2.24E-01 | 7.74E-01 |
| <b>ERN2</b>        | -2.84 | 3.87E-01 | 1.00E+00 | -1.13 | 2.24E-01 | 7.74E-01 |
| <b>CMTR1</b>       | 0.13  | 5.94E-01 | 1.00E+00 | 0.52  | 2.24E-01 | 7.74E-01 |
| <b>KRTAP5-AS1</b>  | -1.94 | 1.58E-01 | 1.00E+00 | 1.25  | 2.24E-01 | 7.74E-01 |
| <b>SCRIB</b>       | -0.46 | 1.74E-01 | 1.00E+00 | 0.94  | 2.24E-01 | 7.74E-01 |
| <b>XLOC_010043</b> | -1.04 | 7.17E-01 | 1.00E+00 | 1.33  | 2.24E-01 | 7.74E-01 |
| <b>ARG1</b>        | 0.62  | 3.40E-01 | 1.00E+00 | 0.83  | 2.24E-01 | 7.74E-01 |
| <b>AL133406.3</b>  | 0.29  | 6.68E-01 | 1.00E+00 | 1.27  | 2.24E-01 | 7.74E-01 |
| <b>NR1D2</b>       | -0.66 | 2.09E-03 | 2.39E-01 | -0.36 | 2.24E-01 | 7.74E-01 |
| <b>LAPTM4A</b>     | 0.28  | 9.15E-02 | 1.00E+00 | -0.36 | 2.24E-01 | 7.74E-01 |
| <b>AC020978.3</b>  | -0.38 | 7.93E-01 | 1.00E+00 | -1.55 | 2.24E-01 | 7.74E-01 |
| <b>CNFN</b>        | 0.11  | 8.48E-01 | 1.00E+00 | 0.75  | 2.25E-01 | 7.75E-01 |
| <b>GSTA4</b>       | -0.05 | 8.90E-01 | 1.00E+00 | -0.45 | 2.25E-01 | 7.75E-01 |
| <b>TRAV8-3</b>     | -2.23 | 5.04E-01 | 1.00E+00 | 1.72  | 2.25E-01 | 7.75E-01 |

|             |       |          |          |       |          |          |
|-------------|-------|----------|----------|-------|----------|----------|
| ADAM9       | 0.23  | 3.92E-01 | 1.00E+00 | 0.39  | 2.25E-01 | 7.75E-01 |
| AC009152.3  | -2.47 | 4.69E-01 | 1.00E+00 | 1.73  | 2.25E-01 | 7.75E-01 |
| ARHGAP18    | 0.23  | 5.14E-01 | 1.00E+00 | 0.33  | 2.25E-01 | 7.75E-01 |
| EEF2K       | 0.29  | 3.76E-01 | 1.00E+00 | -0.42 | 2.25E-01 | 7.75E-01 |
| HOXC-AS2    | -0.79 | 1.96E-01 | 1.00E+00 | -0.75 | 2.25E-01 | 7.75E-01 |
| AQP4        | 3.44  | 1.99E-01 | 1.00E+00 | -1.51 | 2.25E-01 | 7.75E-01 |
| CDC7        | -0.42 | 1.94E-01 | 1.00E+00 | 0.43  | 2.25E-01 | 7.75E-01 |
| LINC01936   | 0.47  | 5.02E-01 | 1.00E+00 | 1.05  | 2.25E-01 | 7.75E-01 |
| XLOC_005173 | -3.12 | 2.14E-01 | 1.00E+00 | -3.88 | 2.25E-01 | 7.75E-01 |
| CD1E        | 0.31  | 6.29E-01 | 1.00E+00 | -0.81 | 2.25E-01 | 7.75E-01 |
| COMMD9      | -0.03 | 8.59E-01 | 1.00E+00 | -0.36 | 2.25E-01 | 7.75E-01 |
| GM2A        | -0.14 | 6.38E-01 | 1.00E+00 | 0.41  | 2.25E-01 | 7.75E-01 |
| MIA2        | -0.05 | 8.54E-01 | 1.00E+00 | -0.19 | 2.25E-01 | 7.75E-01 |
| EHD4        | -0.39 | 4.72E-02 | 1.00E+00 | 0.42  | 2.25E-01 | 7.75E-01 |
| CEP19       | 0.06  | 9.17E-01 | 1.00E+00 | -0.71 | 2.25E-01 | 7.75E-01 |
| CDIP1       | -0.04 | 8.63E-01 | 1.00E+00 | 0.37  | 2.25E-01 | 7.75E-01 |
| AC020915.2  | -1.28 | 3.91E-01 | 1.00E+00 | 1.13  | 2.25E-01 | 7.75E-01 |
| TNRC6C-AS1  | -0.36 | 4.91E-01 | 1.00E+00 | 1.30  | 2.25E-01 | 7.75E-01 |
| GCNT1       | -0.29 | 4.96E-01 | 1.00E+00 | 0.47  | 2.26E-01 | 7.75E-01 |
| NXPH4       | -0.28 | 5.31E-01 | 1.00E+00 | -0.79 | 2.26E-01 | 7.75E-01 |
| TXNDC16     | -0.02 | 9.34E-01 | 1.00E+00 | -0.26 | 2.26E-01 | 7.75E-01 |
| ANKRD27     | 0.22  | 3.61E-01 | 1.00E+00 | -0.29 | 2.26E-01 | 7.75E-01 |
| HNRNPA1P76  | NA    | NA       | NA       | -2.07 | 2.26E-01 | 7.75E-01 |
| XLOC_010097 | 0.10  | 8.74E-01 | 1.00E+00 | -0.67 | 2.26E-01 | 7.75E-01 |
| RPS20       | -0.07 | 8.12E-01 | 1.00E+00 | 0.28  | 2.26E-01 | 7.75E-01 |
| MUC12       | -0.94 | 5.03E-01 | 1.00E+00 | 1.01  | 2.26E-01 | 7.75E-01 |
| PLK1        | 0.55  | 1.16E-01 | 1.00E+00 | 0.43  | 2.26E-01 | 7.75E-01 |
| COL6A4P1    | 0.18  | 9.09E-01 | 1.00E+00 | 1.31  | 2.26E-01 | 7.75E-01 |
| AC016405.2  | -2.01 | 4.67E-01 | 1.00E+00 | -1.28 | 2.26E-01 | 7.75E-01 |
| AOX1        | 1.07  | 5.12E-02 | 1.00E+00 | 0.79  | 2.26E-01 | 7.75E-01 |
| GPD1L       | 0.16  | 5.21E-01 | 1.00E+00 | -0.43 | 2.26E-01 | 7.75E-01 |
| ADAL        | -0.18 | 6.32E-01 | 1.00E+00 | -0.39 | 2.26E-01 | 7.75E-01 |

|                   |       |          |          |       |          |          |
|-------------------|-------|----------|----------|-------|----------|----------|
| <b>CCDC85A</b>    | -0.23 | 6.68E-01 | 1.00E+00 | -0.92 | 2.26E-01 | 7.75E-01 |
| <b>PWWP2B</b>     | 0.03  | 9.16E-01 | 1.00E+00 | 0.54  | 2.26E-01 | 7.75E-01 |
| <b>WDR45BP1</b>   | -0.21 | 9.53E-01 | 1.00E+00 | -1.36 | 2.26E-01 | 7.75E-01 |
| <b>NRG3</b>       | -0.44 | 6.21E-01 | 1.00E+00 | -1.36 | 2.26E-01 | 7.75E-01 |
| <b>LINC01119</b>  | 0.71  | 4.03E-01 | 1.00E+00 | 1.27  | 2.26E-01 | 7.75E-01 |
| <b>SDCBP2</b>     | 0.02  | 9.65E-01 | 1.00E+00 | 0.49  | 2.26E-01 | 7.75E-01 |
| <b>LRRIQ1</b>     | -1.35 | 1.18E-01 | 1.00E+00 | -1.12 | 2.26E-01 | 7.75E-01 |
| <b>AL356599.1</b> | -0.27 | 4.40E-01 | 1.00E+00 | -0.55 | 2.26E-01 | 7.75E-01 |
| <b>RPS23P1</b>    | -3.34 | 1.14E-01 | 1.00E+00 | 1.65  | 2.26E-01 | 7.75E-01 |
| <b>AC004765.1</b> | -0.50 | 8.71E-01 | 1.00E+00 | -1.97 | 2.26E-01 | 7.75E-01 |
| <b>SMO</b>        | -0.12 | 6.47E-01 | 1.00E+00 | 0.54  | 2.26E-01 | 7.75E-01 |
| <b>RCSD1</b>      | 0.32  | 3.07E-01 | 1.00E+00 | 0.81  | 2.26E-01 | 7.75E-01 |
| <b>ACIN1</b>      | -0.17 | 4.33E-01 | 1.00E+00 | 0.52  | 2.26E-01 | 7.75E-01 |
| <b>TTPA</b>       | 1.04  | 7.58E-01 | 1.00E+00 | -1.27 | 2.26E-01 | 7.75E-01 |
| <b>AC083873.1</b> | 0.80  | 5.35E-01 | 1.00E+00 | -0.67 | 2.26E-01 | 7.75E-01 |
| <b>MMP25</b>      | -0.76 | 3.14E-01 | 1.00E+00 | 1.33  | 2.26E-01 | 7.75E-01 |
| <b>HOXA3</b>      | -0.34 | 5.22E-01 | 1.00E+00 | -0.55 | 2.26E-01 | 7.75E-01 |
| <b>CALM2P2</b>    | 0.88  | 5.20E-01 | 1.00E+00 | -0.74 | 2.26E-01 | 7.75E-01 |
| <b>NUCB2</b>      | -0.07 | 8.40E-01 | 1.00E+00 | -0.42 | 2.26E-01 | 7.75E-01 |
| <b>ZDHHC4</b>     | 0.25  | 5.81E-01 | 1.00E+00 | -0.38 | 2.26E-01 | 7.75E-01 |
| <b>DDX59</b>      | -0.10 | 6.75E-01 | 1.00E+00 | -0.25 | 2.26E-01 | 7.75E-01 |
| <b>ISCA2</b>      | 0.12  | 6.26E-01 | 1.00E+00 | -0.49 | 2.26E-01 | 7.75E-01 |
| <b>PINX1</b>      | -0.38 | 2.16E-01 | 1.00E+00 | 0.36  | 2.26E-01 | 7.75E-01 |
| <b>TRAV19</b>     | 3.48  | 5.98E-03 | 4.59E-01 | 1.97  | 2.27E-01 | 7.75E-01 |
| <b>SMAD7</b>      | -0.12 | 5.04E-01 | 1.00E+00 | 0.77  | 2.27E-01 | 7.75E-01 |
| <b>EPHB6</b>      | -0.18 | 7.00E-01 | 1.00E+00 | -0.57 | 2.27E-01 | 7.75E-01 |
| <b>RNF144B</b>    | -0.04 | 9.03E-01 | 1.00E+00 | 0.30  | 2.27E-01 | 7.75E-01 |
| <b>ASXL1</b>      | -0.07 | 7.82E-01 | 1.00E+00 | 0.56  | 2.27E-01 | 7.75E-01 |
| <b>AC090971.3</b> | -2.41 | 1.61E-01 | 1.00E+00 | 0.94  | 2.27E-01 | 7.75E-01 |
| <b>MPZL2</b>      | -0.31 | 3.13E-01 | 1.00E+00 | 0.44  | 2.27E-01 | 7.75E-01 |
| <b>ABHD3</b>      | 0.23  | 5.26E-01 | 1.00E+00 | -0.39 | 2.27E-01 | 7.75E-01 |
| <b>C9orf50</b>    | -0.82 | 5.63E-01 | 1.00E+00 | -1.45 | 2.27E-01 | 7.75E-01 |

|             |       |          |          |       |          |          |
|-------------|-------|----------|----------|-------|----------|----------|
| TRGV10      | 2.53  | 2.37E-01 | 1.00E+00 | 2.23  | 2.27E-01 | 7.75E-01 |
| CYSTM1      | 0.06  | 8.91E-01 | 1.00E+00 | -0.42 | 2.27E-01 | 7.75E-01 |
| AC007690.1  | 1.47  | 6.67E-01 | 1.00E+00 | -1.60 | 2.27E-01 | 7.75E-01 |
| FBL         | -0.13 | 6.68E-01 | 1.00E+00 | 0.41  | 2.27E-01 | 7.75E-01 |
| KIAA0825    | -0.02 | 9.61E-01 | 1.00E+00 | -0.62 | 2.27E-01 | 7.75E-01 |
| SYPL1       | 0.09  | 6.57E-01 | 1.00E+00 | -0.33 | 2.27E-01 | 7.75E-01 |
| AC008440.3  | 0.86  | 2.32E-01 | 1.00E+00 | 0.95  | 2.27E-01 | 7.75E-01 |
| UBE2Q2L     | 1.32  | 3.47E-01 | 1.00E+00 | -1.22 | 2.27E-01 | 7.75E-01 |
| THRB        | 0.12  | 6.24E-01 | 1.00E+00 | -0.31 | 2.27E-01 | 7.75E-01 |
| TPX2        | -0.06 | 8.60E-01 | 1.00E+00 | 0.45  | 2.27E-01 | 7.75E-01 |
| TRMO        | 0.21  | 2.78E-01 | 1.00E+00 | 0.29  | 2.27E-01 | 7.75E-01 |
| AL161908.1  | -1.28 | 2.83E-01 | 1.00E+00 | -1.39 | 2.27E-01 | 7.75E-01 |
| SLC35F5     | 0.42  | 2.52E-01 | 1.00E+00 | -0.32 | 2.27E-01 | 7.75E-01 |
| SYNPO2L     | -2.33 | 2.53E-01 | 1.00E+00 | 1.64  | 2.27E-01 | 7.75E-01 |
| ZNF556      | -2.95 | 2.66E-01 | 1.00E+00 | 2.22  | 2.27E-01 | 7.75E-01 |
| HMGB1P10    | -0.09 | 7.81E-01 | 1.00E+00 | -0.32 | 2.27E-01 | 7.76E-01 |
| CALML5      | -0.05 | 9.25E-01 | 1.00E+00 | 0.80  | 2.27E-01 | 7.76E-01 |
| CATSPERB    | 0.33  | 6.93E-01 | 1.00E+00 | 1.22  | 2.27E-01 | 7.76E-01 |
| BHLHE40-AS1 | 0.34  | 5.10E-01 | 1.00E+00 | -0.57 | 2.27E-01 | 7.76E-01 |
| MIR4697HG   | -0.07 | 9.06E-01 | 1.00E+00 | -1.04 | 2.28E-01 | 7.76E-01 |
| PACSIN1     | -1.61 | 3.25E-01 | 1.00E+00 | 1.36  | 2.28E-01 | 7.76E-01 |
| CPN2        | -3.28 | 9.45E-02 | 1.00E+00 | 1.48  | 2.28E-01 | 7.76E-01 |
| SEMA3A      | 0.41  | 2.45E-01 | 1.00E+00 | 0.67  | 2.28E-01 | 7.76E-01 |
| SOX8        | 0.18  | 7.70E-01 | 1.00E+00 | -0.94 | 2.28E-01 | 7.76E-01 |
| NPM1        | -0.10 | 5.15E-01 | 1.00E+00 | 0.21  | 2.28E-01 | 7.76E-01 |
| CUBN        | 0.41  | 2.73E-01 | 1.00E+00 | 0.76  | 2.28E-01 | 7.76E-01 |
| MAB21L1     | 0.36  | 6.91E-01 | 1.00E+00 | 1.11  | 2.28E-01 | 7.76E-01 |
| YPEL4       | -0.11 | 8.46E-01 | 1.00E+00 | 0.66  | 2.28E-01 | 7.76E-01 |
| CLEC9A      | -0.06 | 9.16E-01 | 1.00E+00 | 1.01  | 2.28E-01 | 7.76E-01 |
| CSNK1D      | 0.13  | 5.23E-01 | 1.00E+00 | 0.31  | 2.28E-01 | 7.76E-01 |
| COQ3        | -0.07 | 7.22E-01 | 1.00E+00 | -0.40 | 2.28E-01 | 7.76E-01 |
| AC092919.2  | -2.63 | 9.74E-03 | 6.12E-01 | 1.16  | 2.28E-01 | 7.76E-01 |

|                   |       |          |          |       |          |          |
|-------------------|-------|----------|----------|-------|----------|----------|
| <b>AC023830.3</b> | 2.48  | 9.77E-02 | 1.00E+00 | -3.17 | 2.28E-01 | 7.76E-01 |
| <b>HMCN2</b>      | -0.14 | 8.31E-01 | 1.00E+00 | 0.82  | 2.28E-01 | 7.76E-01 |
| <b>PANTR1</b>     | 0.34  | 7.05E-01 | 1.00E+00 | 1.00  | 2.28E-01 | 7.76E-01 |
| <b>DUTP6</b>      | 0.10  | 9.26E-01 | 1.00E+00 | 1.04  | 2.28E-01 | 7.76E-01 |
| <b>PQLC3</b>      | 0.25  | 2.55E-01 | 1.00E+00 | -0.48 | 2.28E-01 | 7.76E-01 |
| <b>ITGA3</b>      | -0.45 | 4.54E-02 | 1.00E+00 | 0.69  | 2.28E-01 | 7.76E-01 |
| <b>SRD5A3</b>     | -0.27 | 3.46E-01 | 1.00E+00 | -0.36 | 2.28E-01 | 7.76E-01 |
| <b>KCNQ1</b>      | -0.03 | 9.48E-01 | 1.00E+00 | 1.01  | 2.28E-01 | 7.76E-01 |
| <b>TRAT1</b>      | -1.43 | 1.79E-01 | 1.00E+00 | 1.09  | 2.28E-01 | 7.76E-01 |
| <b>SULT1B1</b>    | 1.68  | 2.73E-01 | 1.00E+00 | 1.52  | 2.28E-01 | 7.76E-01 |
| <b>GAS2L3</b>     | 0.15  | 5.29E-01 | 1.00E+00 | 0.43  | 2.28E-01 | 7.76E-01 |
| <b>AC097461.1</b> | 0.16  | 7.19E-01 | 1.00E+00 | -0.66 | 2.28E-01 | 7.76E-01 |
| <b>MIR4482-1</b>  | 2.57  | 2.75E-01 | 1.00E+00 | 0.99  | 2.28E-01 | 7.76E-01 |
| <b>NLRC3</b>      | 0.52  | 2.16E-01 | 1.00E+00 | 0.97  | 2.29E-01 | 7.76E-01 |
| <b>DENND1A</b>    | -0.35 | 2.08E-01 | 1.00E+00 | 0.69  | 2.29E-01 | 7.76E-01 |
| <b>RBCK1</b>      | -0.25 | 4.37E-01 | 1.00E+00 | 0.47  | 2.29E-01 | 7.76E-01 |
| <b>LINC01549</b>  | -2.82 | 4.11E-02 | 1.00E+00 | 1.20  | 2.29E-01 | 7.76E-01 |
| <b>MCTS1</b>      | -0.04 | 8.76E-01 | 1.00E+00 | -0.28 | 2.29E-01 | 7.77E-01 |
| <b>SPATS2L</b>    | -0.01 | 9.86E-01 | 1.00E+00 | 0.34  | 2.29E-01 | 7.77E-01 |
| <b>G7528</b>      | 0.29  | 8.50E-01 | 1.00E+00 | 1.37  | 2.29E-01 | 7.77E-01 |
| <b>MED29</b>      | -0.07 | 6.69E-01 | 1.00E+00 | 0.16  | 2.29E-01 | 7.77E-01 |
| <b>SLC5A10</b>    | 0.00  | 9.99E-01 | 1.00E+00 | 0.94  | 2.29E-01 | 7.77E-01 |
| <b>C2orf66</b>    | -0.02 | 9.95E-01 | 1.00E+00 | -2.18 | 2.29E-01 | 7.77E-01 |
| <b>AC026369.3</b> | NA    | NA       | NA       | 2.40  | 2.29E-01 | 7.77E-01 |
| <b>FAM3C</b>      | -0.04 | 8.48E-01 | 1.00E+00 | -0.53 | 2.29E-01 | 7.77E-01 |
| <b>YPEL3</b>      | -0.01 | 9.70E-01 | 1.00E+00 | -0.73 | 2.29E-01 | 7.77E-01 |
| <b>AC025594.2</b> | -2.68 | 1.18E-01 | 1.00E+00 | 1.86  | 2.29E-01 | 7.77E-01 |
| <b>NETO1</b>      | 1.92  | 5.58E-02 | 1.00E+00 | 1.52  | 2.29E-01 | 7.77E-01 |
| <b>G5134</b>      | 0.00  | 1.00E+00 | 1.00E+00 | 1.41  | 2.29E-01 | 7.77E-01 |
| <b>CENPO</b>      | -0.08 | 8.12E-01 | 1.00E+00 | 0.57  | 2.29E-01 | 7.77E-01 |
| <b>RUFY1</b>      | -0.07 | 6.85E-01 | 1.00E+00 | -0.31 | 2.29E-01 | 7.77E-01 |
| <b>ITPKB-IT1</b>  | -2.98 | 1.32E-01 | 1.00E+00 | -1.55 | 2.29E-01 | 7.77E-01 |

|                   |       |          |          |       |          |          |
|-------------------|-------|----------|----------|-------|----------|----------|
| <b>RASGEF1A</b>   | -0.09 | 8.52E-01 | 1.00E+00 | 0.87  | 2.29E-01 | 7.77E-01 |
| <b>IGHV1-24</b>   | 1.46  | 6.70E-01 | 1.00E+00 | 3.80  | 2.29E-01 | 7.77E-01 |
| <b>SUDS3</b>      | 0.32  | 2.00E-01 | 1.00E+00 | -0.24 | 2.29E-01 | 7.77E-01 |
| <b>BACE1</b>      | -0.19 | 4.21E-01 | 1.00E+00 | 0.55  | 2.29E-01 | 7.77E-01 |
| <b>SCGB1B2P</b>   | -1.22 | 4.93E-01 | 1.00E+00 | -3.76 | 2.29E-01 | 7.77E-01 |
| <b>ALPK3</b>      | 0.23  | 7.68E-01 | 1.00E+00 | 1.14  | 2.30E-01 | 7.77E-01 |
| <b>AC104843.1</b> | 0.10  | 9.77E-01 | 1.00E+00 | -0.82 | 2.30E-01 | 7.77E-01 |
| <b>ZNF197</b>     | 0.00  | 9.96E-01 | 1.00E+00 | 0.43  | 2.30E-01 | 7.78E-01 |
| <b>MSNP1</b>      | 0.43  | 9.03E-01 | 1.00E+00 | 0.78  | 2.30E-01 | 7.78E-01 |
| <b>VGF</b>        | -2.82 | 2.03E-04 | 4.65E-02 | 1.68  | 2.30E-01 | 7.78E-01 |
| <b>HS3ST6</b>     | -0.12 | 8.09E-01 | 1.00E+00 | -0.86 | 2.30E-01 | 7.78E-01 |
| <b>ZNF611</b>     | 0.05  | 8.31E-01 | 1.00E+00 | -0.26 | 2.30E-01 | 7.78E-01 |
| <b>SCYL3</b>      | 0.26  | 2.32E-01 | 1.00E+00 | -0.23 | 2.30E-01 | 7.78E-01 |
| <b>TRBV5-6</b>    | -1.52 | 3.87E-01 | 1.00E+00 | 1.51  | 2.30E-01 | 7.78E-01 |
| <b>OLFM4</b>      | -0.17 | 8.77E-01 | 1.00E+00 | 1.64  | 2.30E-01 | 7.78E-01 |
| <b>AC008622.2</b> | 0.33  | 7.86E-01 | 1.00E+00 | -0.86 | 2.30E-01 | 7.78E-01 |
| <b>AC092653.2</b> | 1.22  | 6.01E-01 | 1.00E+00 | -1.03 | 2.30E-01 | 7.79E-01 |
| <b>DCX</b>        | 0.09  | 9.38E-01 | 1.00E+00 | 1.17  | 2.30E-01 | 7.79E-01 |
| <b>RIPPLY2</b>    | -1.37 | 5.37E-01 | 1.00E+00 | 1.86  | 2.30E-01 | 7.79E-01 |
| <b>SFT2D1</b>     | 0.49  | 2.44E-02 | 9.22E-01 | -0.37 | 2.31E-01 | 7.79E-01 |
| <b>UBE4A</b>      | 0.00  | 9.91E-01 | 1.00E+00 | -0.20 | 2.31E-01 | 7.79E-01 |
| <b>SIK2</b>       | 0.29  | 4.67E-01 | 1.00E+00 | 0.48  | 2.31E-01 | 7.79E-01 |
| <b>ANKRD16</b>    | -0.20 | 4.34E-01 | 1.00E+00 | -0.65 | 2.31E-01 | 7.79E-01 |
| <b>AC022415.1</b> | 0.26  | 7.96E-01 | 1.00E+00 | -0.76 | 2.31E-01 | 7.79E-01 |
| <b>NPIP3</b>      | -0.30 | 7.37E-01 | 1.00E+00 | 0.95  | 2.31E-01 | 7.79E-01 |
| <b>RNF113A</b>    | -0.02 | 9.09E-01 | 1.00E+00 | 0.19  | 2.31E-01 | 7.79E-01 |
| <b>ADM</b>        | -0.63 | 1.39E-01 | 1.00E+00 | 0.56  | 2.31E-01 | 7.79E-01 |
| <b>FAM189A1</b>   | -0.65 | 5.14E-01 | 1.00E+00 | -1.36 | 2.31E-01 | 7.79E-01 |
| <b>INO80</b>      | -0.11 | 5.38E-01 | 1.00E+00 | 0.48  | 2.31E-01 | 7.79E-01 |
| <b>DMTN</b>       | 0.09  | 6.78E-01 | 1.00E+00 | -0.46 | 2.31E-01 | 7.79E-01 |
| <b>TMEM258</b>    | -0.15 | 4.30E-01 | 1.00E+00 | -0.52 | 2.31E-01 | 7.79E-01 |
| <b>G39634</b>     | -0.12 | 9.31E-01 | 1.00E+00 | 1.33  | 2.31E-01 | 7.79E-01 |



|             |       |          |          |       |          |          |
|-------------|-------|----------|----------|-------|----------|----------|
| SLC40A1     | 0.53  | 2.37E-01 | 1.00E+00 | -0.41 | 2.31E-01 | 7.79E-01 |
| PDE4A       | 0.01  | 9.74E-01 | 1.00E+00 | 0.55  | 2.31E-01 | 7.79E-01 |
| PIDD1       | 0.00  | 9.99E-01 | 1.00E+00 | 0.74  | 2.31E-01 | 7.79E-01 |
| XLOC_003463 | -1.92 | 5.78E-01 | 1.00E+00 | -1.72 | 2.31E-01 | 7.79E-01 |
| ZNF445      | 0.27  | 3.92E-01 | 1.00E+00 | 0.62  | 2.31E-01 | 7.79E-01 |
| RNF138      | 0.02  | 9.38E-01 | 1.00E+00 | -0.31 | 2.31E-01 | 7.79E-01 |
| RNF145      | 0.10  | 6.69E-01 | 1.00E+00 | 0.51  | 2.31E-01 | 7.79E-01 |
| PHF20       | -0.06 | 7.41E-01 | 1.00E+00 | 0.18  | 2.31E-01 | 7.79E-01 |
| ZFP92       | 0.31  | 6.82E-01 | 1.00E+00 | 1.16  | 2.31E-01 | 7.79E-01 |
| RNU1-59P    | -0.86 | 4.35E-01 | 1.00E+00 | -0.88 | 2.31E-01 | 7.79E-01 |
| TSN         | 0.02  | 8.84E-01 | 1.00E+00 | -0.25 | 2.31E-01 | 7.79E-01 |
| NXPE3       | 0.26  | 4.22E-01 | 1.00E+00 | 0.62  | 2.31E-01 | 7.79E-01 |
| LMF1-AS1    | 0.42  | 7.06E-01 | 1.00E+00 | 1.19  | 2.31E-01 | 7.79E-01 |
| MED25       | -0.13 | 6.40E-01 | 1.00E+00 | 0.64  | 2.31E-01 | 7.79E-01 |
| 9-Sep       | -0.28 | 1.74E-01 | 1.00E+00 | 0.68  | 2.32E-01 | 7.79E-01 |
| ARGFXP2     | 0.67  | 8.44E-01 | 1.00E+00 | 2.08  | 2.32E-01 | 7.79E-01 |
| AC024575.1  | 2.23  | 3.37E-01 | 1.00E+00 | 1.02  | 2.32E-01 | 7.79E-01 |
| PDCD5P1     | -0.58 | 8.67E-01 | 1.00E+00 | -0.94 | 2.32E-01 | 7.79E-01 |
| BX088651.4  | -0.77 | 4.33E-01 | 1.00E+00 | -0.73 | 2.32E-01 | 7.79E-01 |
| CLPTM1L     | 0.11  | 5.33E-01 | 1.00E+00 | -0.57 | 2.32E-01 | 7.79E-01 |
| DMGDH       | 0.68  | 2.04E-01 | 1.00E+00 | -0.80 | 2.32E-01 | 7.79E-01 |
| C16orf71    | -0.42 | 6.33E-01 | 1.00E+00 | -1.21 | 2.32E-01 | 7.79E-01 |
| CPT1C       | -0.78 | 1.46E-02 | 7.60E-01 | 0.52  | 2.32E-01 | 7.79E-01 |
| DIAPH2-AS1  | -1.16 | 3.60E-01 | 1.00E+00 | 1.01  | 2.32E-01 | 7.79E-01 |
| AC025166.1  | -0.43 | 6.77E-01 | 1.00E+00 | -0.97 | 2.32E-01 | 7.79E-01 |
| CASP1       | -0.17 | 6.04E-01 | 1.00E+00 | 0.31  | 2.32E-01 | 7.79E-01 |
| AC107067.1  | -0.07 | 9.59E-01 | 1.00E+00 | 1.17  | 2.32E-01 | 7.79E-01 |
| EIF4EBP1    | -0.31 | 3.60E-01 | 1.00E+00 | 0.39  | 2.32E-01 | 7.79E-01 |
| AC011416.3  | -2.54 | 1.76E-02 | 8.33E-01 | -1.00 | 2.32E-01 | 7.79E-01 |
| AC127070.4  | 0.75  | 7.33E-01 | 1.00E+00 | -1.17 | 2.32E-01 | 7.79E-01 |
| TARS2       | -0.01 | 9.55E-01 | 1.00E+00 | 0.17  | 2.32E-01 | 7.79E-01 |
| PA2G4P6     | -1.52 | 6.60E-01 | 1.00E+00 | 0.96  | 2.32E-01 | 7.79E-01 |

|            |       |          |          |       |          |          |
|------------|-------|----------|----------|-------|----------|----------|
| RPS6KA5    | -0.02 | 9.46E-01 | 1.00E+00 | -0.34 | 2.32E-01 | 7.79E-01 |
| ADM2       | -0.01 | 9.92E-01 | 1.00E+00 | 1.22  | 2.32E-01 | 7.79E-01 |
| KLHL10     | -0.14 | 9.31E-01 | 1.00E+00 | -1.41 | 2.32E-01 | 7.79E-01 |
| ARID5B     | -0.08 | 7.53E-01 | 1.00E+00 | 0.30  | 2.32E-01 | 7.79E-01 |
| ZNF568     | 0.37  | 1.97E-01 | 1.00E+00 | -0.37 | 2.32E-01 | 7.79E-01 |
| SKA1       | -0.15 | 7.06E-01 | 1.00E+00 | 0.69  | 2.32E-01 | 7.79E-01 |
| PAXX       | -0.25 | 4.54E-01 | 1.00E+00 | 0.28  | 2.32E-01 | 7.79E-01 |
| PHBP12     | -1.93 | 5.74E-01 | 1.00E+00 | -1.38 | 2.32E-01 | 7.79E-01 |
| GLYATL1P4  | -1.47 | 3.14E-01 | 1.00E+00 | -1.74 | 2.32E-01 | 7.79E-01 |
| BX005266.2 | 0.35  | 7.07E-01 | 1.00E+00 | -0.76 | 2.32E-01 | 7.79E-01 |
| PET100     | 0.47  | 6.23E-01 | 1.00E+00 | -0.70 | 2.32E-01 | 7.79E-01 |
| SF3B1      | 0.01  | 9.77E-01 | 1.00E+00 | 0.14  | 2.32E-01 | 7.79E-01 |
| COL10A1    | 0.33  | 7.34E-01 | 1.00E+00 | 1.04  | 2.32E-01 | 7.79E-01 |
| KYAT3      | -0.20 | 4.99E-01 | 1.00E+00 | -0.28 | 2.32E-01 | 7.79E-01 |
| TUG1       | 0.00  | 9.97E-01 | 1.00E+00 | 0.26  | 2.32E-01 | 7.79E-01 |
| TMEM54     | 0.06  | 8.67E-01 | 1.00E+00 | -0.70 | 2.32E-01 | 7.79E-01 |
| LRFN3      | -0.09 | 7.13E-01 | 1.00E+00 | 0.96  | 2.33E-01 | 7.79E-01 |
| TBL1X      | 0.51  | 4.50E-02 | 1.00E+00 | 0.32  | 2.33E-01 | 7.79E-01 |
| TRPV6      | -0.16 | 6.36E-01 | 1.00E+00 | -0.68 | 2.33E-01 | 7.79E-01 |
| AL590999.1 | 1.18  | 3.85E-01 | 1.00E+00 | 1.46  | 2.33E-01 | 7.79E-01 |
| TRIP12     | 0.06  | 6.81E-01 | 1.00E+00 | 0.41  | 2.33E-01 | 7.79E-01 |
| FSTL5      | -1.09 | 2.90E-01 | 1.00E+00 | 1.58  | 2.33E-01 | 7.79E-01 |
| RASGRP3    | 0.22  | 7.12E-01 | 1.00E+00 | 0.56  | 2.33E-01 | 7.79E-01 |
| AC117402.1 | -2.88 | 8.48E-02 | 1.00E+00 | -1.88 | 2.33E-01 | 7.80E-01 |
| LIAS       | -0.11 | 6.79E-01 | 1.00E+00 | -0.33 | 2.33E-01 | 7.80E-01 |
| ZC3H4      | -0.09 | 7.22E-01 | 1.00E+00 | 0.63  | 2.33E-01 | 7.80E-01 |
| CTBP1      | -0.19 | 2.34E-01 | 1.00E+00 | -0.26 | 2.33E-01 | 7.80E-01 |
| PEX26      | 0.10  | 6.26E-01 | 1.00E+00 | 0.65  | 2.33E-01 | 7.80E-01 |
| C12orf4    | 0.15  | 5.09E-01 | 1.00E+00 | 0.27  | 2.33E-01 | 7.80E-01 |
| GABRB3     | 0.10  | 8.70E-01 | 1.00E+00 | -0.78 | 2.33E-01 | 7.80E-01 |
| NAP1L1     | -0.04 | 8.37E-01 | 1.00E+00 | 0.21  | 2.33E-01 | 7.80E-01 |
| CUL5       | 0.17  | 4.23E-01 | 1.00E+00 | -0.27 | 2.33E-01 | 7.80E-01 |

|                   |       |          |          |       |          |          |
|-------------------|-------|----------|----------|-------|----------|----------|
| <b>TSEN34</b>     | -0.13 | 5.87E-01 | 1.00E+00 | -0.55 | 2.33E-01 | 7.80E-01 |
| <b>TMEM177</b>    | 0.16  | 6.81E-01 | 1.00E+00 | -0.30 | 2.33E-01 | 7.80E-01 |
| <b>ZDHHC15</b>    | 0.03  | 9.25E-01 | 1.00E+00 | -0.47 | 2.33E-01 | 7.80E-01 |
| <b>PGLYRP4</b>    | -0.25 | 5.36E-01 | 1.00E+00 | 0.73  | 2.34E-01 | 7.80E-01 |
| <b>EXTL3</b>      | 0.02  | 9.22E-01 | 1.00E+00 | 0.52  | 2.34E-01 | 7.80E-01 |
| <b>STK19</b>      | 0.00  | 1.00E+00 | 1.00E+00 | 0.31  | 2.34E-01 | 7.81E-01 |
| <b>MRPL35P2</b>   | -3.57 | 2.42E-02 | 9.20E-01 | 1.21  | 2.34E-01 | 7.81E-01 |
| <b>RELB</b>       | -0.21 | 5.57E-01 | 1.00E+00 | 0.97  | 2.34E-01 | 7.81E-01 |
| <b>AC016700.2</b> | 0.04  | 9.87E-01 | 1.00E+00 | -0.73 | 2.34E-01 | 7.81E-01 |
| <b>AL355987.4</b> | 1.08  | 2.98E-01 | 1.00E+00 | -1.26 | 2.34E-01 | 7.81E-01 |
| <b>AC011444.1</b> | 0.76  | 5.20E-01 | 1.00E+00 | -0.76 | 2.34E-01 | 7.81E-01 |
| <b>FAM98B</b>     | -0.21 | 1.64E-01 | 1.00E+00 | 0.49  | 2.34E-01 | 7.81E-01 |
| <b>NEXN</b>       | 0.05  | 9.27E-01 | 1.00E+00 | 0.54  | 2.34E-01 | 7.81E-01 |
| <b>AF127577.4</b> | 0.99  | 3.37E-01 | 1.00E+00 | -0.81 | 2.34E-01 | 7.81E-01 |
| <b>PHF12</b>      | -0.27 | 2.22E-01 | 1.00E+00 | 0.58  | 2.34E-01 | 7.81E-01 |
| <b>FRMD6</b>      | 0.10  | 7.45E-01 | 1.00E+00 | 0.27  | 2.34E-01 | 7.81E-01 |
| <b>AL445524.1</b> | 0.27  | 4.97E-01 | 1.00E+00 | -0.50 | 2.34E-01 | 7.81E-01 |
| <b>ADCY1</b>      | 0.00  | 9.97E-01 | 1.00E+00 | 0.95  | 2.34E-01 | 7.81E-01 |
| <b>G26051</b>     | 0.48  | 7.26E-01 | 1.00E+00 | 1.70  | 2.34E-01 | 7.81E-01 |
| <b>ZHX3</b>       | 0.31  | 2.40E-01 | 1.00E+00 | 0.42  | 2.34E-01 | 7.81E-01 |
| <b>UNC13D</b>     | -0.38 | 3.40E-01 | 1.00E+00 | 0.93  | 2.34E-01 | 7.81E-01 |
| <b>LINC00346</b>  | 0.40  | 4.78E-01 | 1.00E+00 | 1.27  | 2.34E-01 | 7.81E-01 |
| <b>RBFOX1</b>     | -0.41 | 8.55E-01 | 1.00E+00 | 1.10  | 2.34E-01 | 7.81E-01 |
| <b>SLC9A9</b>     | 0.34  | 2.15E-01 | 1.00E+00 | 0.27  | 2.34E-01 | 7.81E-01 |
| <b>RPL21P4</b>    | NA    | NA       | NA       | -0.89 | 2.34E-01 | 7.81E-01 |
| <b>MAGED1</b>     | -0.40 | 1.91E-01 | 1.00E+00 | 0.27  | 2.34E-01 | 7.81E-01 |
| <b>PLB1</b>       | -0.69 | 9.80E-02 | 1.00E+00 | 0.38  | 2.34E-01 | 7.81E-01 |
| <b>TFAM</b>       | 0.12  | 6.33E-01 | 1.00E+00 | -0.21 | 2.34E-01 | 7.81E-01 |
| <b>KIF24</b>      | -0.08 | 8.01E-01 | 1.00E+00 | 0.86  | 2.34E-01 | 7.81E-01 |
| <b>TMEM47</b>     | 0.31  | 5.42E-01 | 1.00E+00 | -0.66 | 2.34E-01 | 7.81E-01 |
| <b>USP12-AS1</b>  | -1.55 | 6.51E-01 | 1.00E+00 | 1.03  | 2.34E-01 | 7.81E-01 |
| <b>AP003025.1</b> | -1.20 | 6.88E-01 | 1.00E+00 | 1.57  | 2.35E-01 | 7.81E-01 |

|            |       |          |          |       |          |          |
|------------|-------|----------|----------|-------|----------|----------|
| ZNF555     | -0.14 | 7.15E-01 | 1.00E+00 | -0.49 | 2.35E-01 | 7.81E-01 |
| TLN2       | 0.75  | 2.36E-01 | 1.00E+00 | 0.62  | 2.35E-01 | 7.81E-01 |
| ASPRV1     | 0.15  | 8.18E-01 | 1.00E+00 | 0.75  | 2.35E-01 | 7.81E-01 |
| TMEM182    | 0.22  | 5.23E-01 | 1.00E+00 | -0.54 | 2.35E-01 | 7.81E-01 |
| PRKCZ      | -0.36 | 2.03E-01 | 1.00E+00 | -0.76 | 2.35E-01 | 7.81E-01 |
| SPRR4      | -1.48 | 6.43E-01 | 1.00E+00 | 1.15  | 2.35E-01 | 7.81E-01 |
| DAND5      | 1.09  | 5.40E-01 | 1.00E+00 | -1.26 | 2.35E-01 | 7.81E-01 |
| CHD6       | -0.03 | 8.73E-01 | 1.00E+00 | 0.29  | 2.35E-01 | 7.81E-01 |
| GPR171     | 0.29  | 7.25E-01 | 1.00E+00 | 0.81  | 2.35E-01 | 7.81E-01 |
| CENPU      | -0.71 | 2.02E-01 | 1.00E+00 | -0.60 | 2.35E-01 | 7.81E-01 |
| HOXC12     | 0.34  | 5.32E-01 | 1.00E+00 | -0.63 | 2.35E-01 | 7.81E-01 |
| MAP2K4     | 0.18  | 4.49E-01 | 1.00E+00 | -0.43 | 2.35E-01 | 7.81E-01 |
| ZNF680     | 0.13  | 7.63E-01 | 1.00E+00 | -0.51 | 2.35E-01 | 7.81E-01 |
| CHFR       | -0.14 | 6.57E-01 | 1.00E+00 | 0.34  | 2.35E-01 | 7.81E-01 |
| ADHFE1     | 1.44  | 1.95E-01 | 1.00E+00 | -0.92 | 2.35E-01 | 7.81E-01 |
| DCAF7      | 0.13  | 5.69E-01 | 1.00E+00 | 0.33  | 2.35E-01 | 7.81E-01 |
| SNUPN      | 0.00  | 9.95E-01 | 1.00E+00 | -0.35 | 2.35E-01 | 7.81E-01 |
| DMRTA1     | -0.07 | 9.55E-01 | 1.00E+00 | 0.85  | 2.35E-01 | 7.81E-01 |
| CDX1       | 1.37  | 1.33E-01 | 1.00E+00 | 1.24  | 2.35E-01 | 7.81E-01 |
| NBPF15     | -0.41 | 2.29E-01 | 1.00E+00 | 0.35  | 2.35E-01 | 7.81E-01 |
| N4BP2L2    | 0.02  | 9.36E-01 | 1.00E+00 | -0.30 | 2.35E-01 | 7.81E-01 |
| FURIN      | -0.29 | 1.62E-01 | 1.00E+00 | 0.77  | 2.35E-01 | 7.81E-01 |
| LRRC3-DT   | 0.58  | 7.35E-01 | 1.00E+00 | -1.58 | 2.35E-01 | 7.81E-01 |
| SORD2P     | -2.66 | 8.68E-02 | 1.00E+00 | 0.90  | 2.36E-01 | 7.82E-01 |
| TSPAN31    | 0.16  | 4.23E-01 | 1.00E+00 | -0.29 | 2.36E-01 | 7.82E-01 |
| LIN9       | 0.10  | 7.73E-01 | 1.00E+00 | -0.49 | 2.36E-01 | 7.82E-01 |
| ERCC1      | -0.29 | 2.39E-01 | 1.00E+00 | 0.19  | 2.36E-01 | 7.82E-01 |
| CDKL1      | 0.70  | 1.01E-01 | 1.00E+00 | 0.51  | 2.36E-01 | 7.82E-01 |
| AL591468.1 | NA    | NA       | NA       | 2.21  | 2.36E-01 | 7.82E-01 |
| XPOT       | 0.11  | 6.53E-01 | 1.00E+00 | -0.25 | 2.36E-01 | 7.82E-01 |
| AL390728.4 | -0.04 | 9.44E-01 | 1.00E+00 | 0.40  | 2.36E-01 | 7.82E-01 |
| REM1       | 0.18  | 7.55E-01 | 1.00E+00 | 0.65  | 2.36E-01 | 7.82E-01 |

|             |       |          |          |       |          |          |
|-------------|-------|----------|----------|-------|----------|----------|
| LINC01465   | -1.14 | 4.55E-02 | 1.00E+00 | 0.62  | 2.36E-01 | 7.82E-01 |
| TMEM88      | 1.49  | 6.44E-02 | 1.00E+00 | -0.81 | 2.36E-01 | 7.82E-01 |
| LIF         | -0.12 | 6.83E-01 | 1.00E+00 | 0.87  | 2.36E-01 | 7.82E-01 |
| BACH1-AS1   | -0.78 | 7.87E-01 | 1.00E+00 | -1.39 | 2.36E-01 | 7.82E-01 |
| AL359541.1  | 0.60  | 7.19E-01 | 1.00E+00 | 1.24  | 2.36E-01 | 7.82E-01 |
| C8orf34-AS1 | -3.35 | 2.92E-02 | 9.89E-01 | 1.27  | 2.36E-01 | 7.82E-01 |
| CALD1       | 0.00  | 9.94E-01 | 1.00E+00 | 0.39  | 2.36E-01 | 7.82E-01 |
| XRCC3       | -0.06 | 8.74E-01 | 1.00E+00 | 0.51  | 2.36E-01 | 7.82E-01 |
| FOXD2-AS1   | 0.02  | 9.83E-01 | 1.00E+00 | 1.30  | 2.36E-01 | 7.83E-01 |
| FAM129C     | -0.40 | 7.57E-01 | 1.00E+00 | 1.69  | 2.36E-01 | 7.83E-01 |
| TMEM95      | -0.57 | 6.93E-01 | 1.00E+00 | 1.67  | 2.36E-01 | 7.83E-01 |
| HSPD1P4     | 1.33  | 5.65E-01 | 1.00E+00 | -0.70 | 2.36E-01 | 7.83E-01 |
| NUTM2B      | 0.18  | 7.71E-01 | 1.00E+00 | 1.61  | 2.37E-01 | 7.83E-01 |
| LINC01473   | -1.31 | 1.75E-01 | 1.00E+00 | -0.88 | 2.37E-01 | 7.83E-01 |
| AL449106.1  | -0.20 | 9.07E-01 | 1.00E+00 | 2.37  | 2.37E-01 | 7.83E-01 |
| LINC00303   | 0.09  | 9.79E-01 | 1.00E+00 | 1.87  | 2.37E-01 | 7.83E-01 |
| AC004771.3  | -2.49 | 2.50E-02 | 9.28E-01 | 0.96  | 2.37E-01 | 7.83E-01 |
| AC068700.1  | 0.28  | 6.95E-01 | 1.00E+00 | -1.20 | 2.37E-01 | 7.83E-01 |
| AC005725.1  | 0.39  | 7.92E-01 | 1.00E+00 | 1.62  | 2.37E-01 | 7.83E-01 |
| BAG4        | 0.07  | 7.62E-01 | 1.00E+00 | -0.43 | 2.37E-01 | 7.83E-01 |
| AP001189.5  | -1.17 | 4.08E-01 | 1.00E+00 | -1.20 | 2.37E-01 | 7.83E-01 |
| AC074011.1  | -1.51 | 4.58E-01 | 1.00E+00 | -1.13 | 2.37E-01 | 7.83E-01 |
| XLOC_013283 | -1.14 | 2.71E-01 | 1.00E+00 | 1.07  | 2.37E-01 | 7.83E-01 |
| AC009159.3  | -1.84 | 5.55E-01 | 1.00E+00 | 0.93  | 2.37E-01 | 7.83E-01 |
| G8753       | -0.42 | 7.51E-01 | 1.00E+00 | -0.92 | 2.37E-01 | 7.83E-01 |
| CCNC        | 0.08  | 7.78E-01 | 1.00E+00 | -0.44 | 2.37E-01 | 7.83E-01 |
| LDOC1       | -0.31 | 2.50E-01 | 1.00E+00 | -0.30 | 2.37E-01 | 7.84E-01 |
| MYO3A       | -0.49 | 3.44E-01 | 1.00E+00 | -1.09 | 2.37E-01 | 7.84E-01 |
| AC063952.1  | 0.13  | 9.71E-01 | 1.00E+00 | 1.15  | 2.37E-01 | 7.84E-01 |
| GPR37       | -0.04 | 8.90E-01 | 1.00E+00 | -0.68 | 2.37E-01 | 7.84E-01 |
| UCP3        | -0.26 | 6.71E-01 | 1.00E+00 | 1.50  | 2.37E-01 | 7.84E-01 |
| G10910      | 0.15  | 8.92E-01 | 1.00E+00 | 1.28  | 2.38E-01 | 7.84E-01 |

|             |       |          |          |       |          |          |
|-------------|-------|----------|----------|-------|----------|----------|
| CAT         | 0.28  | 3.91E-01 | 1.00E+00 | -0.41 | 2.38E-01 | 7.84E-01 |
| AC093249.6  | -0.47 | 4.77E-01 | 1.00E+00 | -0.70 | 2.38E-01 | 7.84E-01 |
| AL451123.1  | -0.03 | 9.59E-01 | 1.00E+00 | 0.73  | 2.38E-01 | 7.84E-01 |
| AC018638.4  | -0.87 | 6.64E-02 | 1.00E+00 | 1.42  | 2.38E-01 | 7.84E-01 |
| AC119428.2  | -2.14 | 2.26E-01 | 1.00E+00 | 1.09  | 2.38E-01 | 7.84E-01 |
| XLOC_011616 | -0.74 | 7.33E-01 | 1.00E+00 | -1.66 | 2.38E-01 | 7.84E-01 |
| ZMYND15     | -0.25 | 6.06E-01 | 1.00E+00 | 1.10  | 2.38E-01 | 7.84E-01 |
| RGS9        | 0.42  | 1.36E-01 | 1.00E+00 | -0.37 | 2.38E-01 | 7.84E-01 |
| LZIC        | -0.16 | 4.53E-01 | 1.00E+00 | -0.21 | 2.38E-01 | 7.84E-01 |
| AL928921.2  | 0.75  | 1.67E-01 | 1.00E+00 | -0.57 | 2.38E-01 | 7.84E-01 |
| GALNT10     | 0.33  | 2.99E-01 | 1.00E+00 | 0.61  | 2.38E-01 | 7.84E-01 |
| TCTEX1D1    | 0.25  | 7.27E-01 | 1.00E+00 | 1.04  | 2.38E-01 | 7.84E-01 |
| CDC42SE2    | 0.09  | 5.89E-01 | 1.00E+00 | 0.22  | 2.38E-01 | 7.84E-01 |
| ADAT1       | -0.17 | 3.42E-01 | 1.00E+00 | 0.30  | 2.38E-01 | 7.84E-01 |
| UNC5C       | 0.07  | 9.33E-01 | 1.00E+00 | 0.83  | 2.38E-01 | 7.84E-01 |
| PTGR1       | -0.08 | 7.73E-01 | 1.00E+00 | -0.26 | 2.38E-01 | 7.84E-01 |
| ACTG1       | -0.28 | 9.18E-02 | 1.00E+00 | 0.22  | 2.38E-01 | 7.84E-01 |
| MYL12B      | 0.00  | 9.80E-01 | 1.00E+00 | -0.27 | 2.38E-01 | 7.84E-01 |
| ZNF260      | 0.33  | 2.88E-01 | 1.00E+00 | -0.33 | 2.38E-01 | 7.84E-01 |
| ZNF124      | 0.07  | 8.55E-01 | 1.00E+00 | 0.45  | 2.38E-01 | 7.84E-01 |
| AC007229.1  | NA    | NA       | NA       | -0.92 | 2.38E-01 | 7.84E-01 |
| L3MBTL2     | -0.15 | 4.89E-01 | 1.00E+00 | 0.34  | 2.38E-01 | 7.84E-01 |
| C2CD4A      | -0.39 | 6.81E-01 | 1.00E+00 | -1.22 | 2.38E-01 | 7.84E-01 |
| PPP1R2      | 0.15  | 4.03E-01 | 1.00E+00 | -0.23 | 2.38E-01 | 7.84E-01 |
| HIST2H2AA4  | -1.40 | 2.70E-01 | 1.00E+00 | -0.58 | 2.38E-01 | 7.84E-01 |
| SUZ12P1     | 0.08  | 8.42E-01 | 1.00E+00 | -0.45 | 2.39E-01 | 7.85E-01 |
| TMEM106A    | 0.61  | 1.69E-01 | 1.00E+00 | 0.88  | 2.39E-01 | 7.85E-01 |
| CDK5RAP1    | 0.26  | 1.45E-01 | 1.00E+00 | 0.21  | 2.39E-01 | 7.85E-01 |
| WIPF2       | -0.10 | 6.51E-01 | 1.00E+00 | 0.28  | 2.39E-01 | 7.85E-01 |
| TNFAIP1     | -0.17 | 3.42E-01 | 1.00E+00 | 0.25  | 2.39E-01 | 7.85E-01 |
| IGHV1-58    | 1.59  | 6.41E-01 | 1.00E+00 | 2.46  | 2.39E-01 | 7.85E-01 |
| MT-CO2      | -0.11 | 7.68E-01 | 1.00E+00 | -0.42 | 2.39E-01 | 7.85E-01 |

|                    |       |          |          |       |          |          |
|--------------------|-------|----------|----------|-------|----------|----------|
| <b>C6orf52</b>     | -1.39 | 1.94E-02 | 8.74E-01 | -0.58 | 2.39E-01 | 7.85E-01 |
| <b>KIF18A</b>      | 0.31  | 4.22E-01 | 1.00E+00 | -0.71 | 2.39E-01 | 7.85E-01 |
| <b>NOD1</b>        | -0.17 | 4.44E-01 | 1.00E+00 | 0.67  | 2.39E-01 | 7.85E-01 |
| <b>XLOC_003930</b> | -0.20 | 8.59E-01 | 1.00E+00 | 1.08  | 2.39E-01 | 7.85E-01 |
| <b>RAC3</b>        | -0.15 | 7.00E-01 | 1.00E+00 | 0.73  | 2.39E-01 | 7.85E-01 |
| <b>G32202</b>      | -0.50 | 5.63E-01 | 1.00E+00 | 1.16  | 2.39E-01 | 7.86E-01 |
| <b>CLCA2</b>       | -0.47 | 2.62E-01 | 1.00E+00 | 0.56  | 2.39E-01 | 7.86E-01 |
| <b>MIR4477B</b>    | 0.72  | 5.15E-01 | 1.00E+00 | 1.14  | 2.39E-01 | 7.86E-01 |
| <b>RAB13</b>       | 0.24  | 3.52E-01 | 1.00E+00 | 0.27  | 2.39E-01 | 7.86E-01 |
| <b>PRRC2B</b>      | -0.08 | 7.22E-01 | 1.00E+00 | 0.72  | 2.39E-01 | 7.86E-01 |
| <b>AC005696.1</b>  | -0.44 | 6.72E-01 | 1.00E+00 | -0.75 | 2.39E-01 | 7.86E-01 |
| <b>XLOC_005574</b> | -0.22 | 7.95E-01 | 1.00E+00 | -0.97 | 2.40E-01 | 7.86E-01 |
| <b>G15373</b>      | -1.60 | 2.67E-01 | 1.00E+00 | -0.76 | 2.40E-01 | 7.86E-01 |
| <b>G38557</b>      | -3.71 | 3.63E-02 | 1.00E+00 | -1.89 | 2.40E-01 | 7.86E-01 |
| <b>CDH2</b>        | -0.99 | 6.35E-02 | 1.00E+00 | 0.93  | 2.40E-01 | 7.86E-01 |
| <b>SLC22A16</b>    | 0.75  | 6.96E-01 | 1.00E+00 | 1.27  | 2.40E-01 | 7.86E-01 |
| <b>CRABP2</b>      | -0.19 | 4.90E-01 | 1.00E+00 | 0.47  | 2.40E-01 | 7.86E-01 |
| <b>AC007036.1</b>  | -0.60 | 8.59E-01 | 1.00E+00 | 1.29  | 2.40E-01 | 7.86E-01 |
| <b>IGLJ3</b>       | NA    | NA       | NA       | 2.23  | 2.40E-01 | 7.86E-01 |
| <b>VPS26A</b>      | 0.02  | 9.30E-01 | 1.00E+00 | -0.43 | 2.40E-01 | 7.86E-01 |
| <b>FASTKD3</b>     | -0.01 | 9.69E-01 | 1.00E+00 | -0.39 | 2.40E-01 | 7.86E-01 |
| <b>CAMSAP1</b>     | -0.28 | 3.17E-01 | 1.00E+00 | 0.51  | 2.40E-01 | 7.86E-01 |
| <b>SETD4</b>       | 0.30  | 2.42E-01 | 1.00E+00 | -0.30 | 2.40E-01 | 7.86E-01 |
| <b>OSCP1</b>       | -0.13 | 6.71E-01 | 1.00E+00 | -0.39 | 2.40E-01 | 7.86E-01 |
| <b>DCLK1</b>       | 0.65  | 2.02E-01 | 1.00E+00 | 0.50  | 2.40E-01 | 7.86E-01 |
| <b>TRAPPC6B</b>    | -0.15 | 6.27E-01 | 1.00E+00 | 0.30  | 2.40E-01 | 7.86E-01 |
| <b>CD8B</b>        | 0.56  | 1.12E-01 | 1.00E+00 | 0.89  | 2.40E-01 | 7.86E-01 |
| <b>AL807752.5</b>  | -1.29 | 3.41E-01 | 1.00E+00 | 1.76  | 2.40E-01 | 7.86E-01 |
| <b>XLOC_000303</b> | -1.28 | 1.79E-01 | 1.00E+00 | -1.29 | 2.40E-01 | 7.86E-01 |
| <b>TMEM106B</b>    | 0.05  | 8.47E-01 | 1.00E+00 | -0.31 | 2.40E-01 | 7.86E-01 |
| <b>LCE2A</b>       | 0.86  | 2.07E-01 | 1.00E+00 | 0.82  | 2.40E-01 | 7.86E-01 |
| <b>HTR7P1</b>      | 0.23  | 4.17E-01 | 1.00E+00 | 0.62  | 2.40E-01 | 7.86E-01 |

|                    |       |          |          |       |          |          |
|--------------------|-------|----------|----------|-------|----------|----------|
| <b>AC090246.1</b>  | 1.13  | 5.64E-01 | 1.00E+00 | 1.48  | 2.40E-01 | 7.86E-01 |
| <b>PLEKHB2</b>     | 0.10  | 6.50E-01 | 1.00E+00 | 0.18  | 2.40E-01 | 7.86E-01 |
| <b>ERMAP</b>       | 0.13  | 5.95E-01 | 1.00E+00 | 0.29  | 2.40E-01 | 7.86E-01 |
| <b>TLE1</b>        | -0.03 | 9.14E-01 | 1.00E+00 | -0.61 | 2.40E-01 | 7.86E-01 |
| <b>CCDC9B</b>      | 0.27  | 4.35E-01 | 1.00E+00 | 0.49  | 2.41E-01 | 7.86E-01 |
| <b>H2AFJ</b>       | 0.25  | 3.55E-01 | 1.00E+00 | 0.27  | 2.41E-01 | 7.86E-01 |
| <b>ACTL6A</b>      | -0.13 | 5.21E-01 | 1.00E+00 | -0.30 | 2.41E-01 | 7.86E-01 |
| <b>ADAMTS18</b>    | -0.54 | 6.83E-01 | 1.00E+00 | 1.40  | 2.41E-01 | 7.86E-01 |
| <b>TRG-AS1</b>     | -0.22 | 8.44E-01 | 1.00E+00 | 1.23  | 2.41E-01 | 7.86E-01 |
| <b>DNAJC21</b>     | 0.13  | 5.31E-01 | 1.00E+00 | -0.33 | 2.41E-01 | 7.87E-01 |
| <b>AL162151.2</b>  | -1.04 | 3.94E-01 | 1.00E+00 | -0.71 | 2.41E-01 | 7.87E-01 |
| <b>GMEB1</b>       | 0.06  | 7.18E-01 | 1.00E+00 | 0.30  | 2.41E-01 | 7.87E-01 |
| <b>TMSB4X</b>      | 0.20  | 4.58E-01 | 1.00E+00 | -0.40 | 2.41E-01 | 7.87E-01 |
| <b>NDUFA13</b>     | 0.20  | 8.69E-01 | 1.00E+00 | -0.68 | 2.41E-01 | 7.87E-01 |
| <b>FAM160B1</b>    | 0.05  | 8.89E-01 | 1.00E+00 | -0.44 | 2.41E-01 | 7.87E-01 |
| <b>LSM3</b>        | 0.05  | 8.19E-01 | 1.00E+00 | -0.48 | 2.41E-01 | 7.87E-01 |
| <b>ENTPD4</b>      | 0.06  | 8.55E-01 | 1.00E+00 | 0.40  | 2.41E-01 | 7.87E-01 |
| <b>LRP4-AS1</b>    | 0.97  | 4.48E-01 | 1.00E+00 | -1.17 | 2.41E-01 | 7.87E-01 |
| <b>DPEP3</b>       | 0.90  | 7.91E-01 | 1.00E+00 | 1.82  | 2.41E-01 | 7.87E-01 |
| <b>HMGB3</b>       | -0.07 | 8.10E-01 | 1.00E+00 | 0.36  | 2.41E-01 | 7.87E-01 |
| <b>STK36</b>       | 0.25  | 5.04E-01 | 1.00E+00 | 0.74  | 2.41E-01 | 7.87E-01 |
| <b>RUNDC3A-AS1</b> | -0.56 | 5.51E-01 | 1.00E+00 | -1.08 | 2.41E-01 | 7.87E-01 |
| <b>NPTN-IT1</b>    | 1.55  | 3.49E-01 | 1.00E+00 | -1.60 | 2.41E-01 | 7.87E-01 |
| <b>ALG1L6P</b>     | 0.18  | 7.73E-01 | 1.00E+00 | 0.85  | 2.41E-01 | 7.87E-01 |
| <b>TAS2R15P</b>    | -2.72 | 2.50E-01 | 1.00E+00 | -1.68 | 2.41E-01 | 7.87E-01 |
| <b>NXPE2</b>       | 0.05  | 9.76E-01 | 1.00E+00 | 1.75  | 2.41E-01 | 7.87E-01 |
| <b>XKRX</b>        | 0.32  | 6.02E-01 | 1.00E+00 | 0.75  | 2.42E-01 | 7.88E-01 |
| <b>ATE1</b>        | 0.00  | 9.90E-01 | 1.00E+00 | -0.25 | 2.42E-01 | 7.88E-01 |
| <b>TRPS1</b>       | -0.73 | 4.49E-02 | 1.00E+00 | 0.35  | 2.42E-01 | 7.88E-01 |
| <b>ZNF331</b>      | 0.16  | 4.27E-01 | 1.00E+00 | 0.32  | 2.42E-01 | 7.88E-01 |
| <b>TEX264</b>      | 0.12  | 6.56E-01 | 1.00E+00 | 0.21  | 2.42E-01 | 7.88E-01 |
| <b>PDE3A</b>       | -0.02 | 9.67E-01 | 1.00E+00 | 0.72  | 2.42E-01 | 7.88E-01 |



|            |       |          |          |       |          |          |
|------------|-------|----------|----------|-------|----------|----------|
| FMN1       | -0.29 | 4.32E-01 | 1.00E+00 | 0.49  | 2.42E-01 | 7.88E-01 |
| ZNF587B    | 0.19  | 6.17E-01 | 1.00E+00 | -0.35 | 2.42E-01 | 7.88E-01 |
| IMPA1      | 0.08  | 8.05E-01 | 1.00E+00 | -0.31 | 2.42E-01 | 7.88E-01 |
| ZNF225     | 0.21  | 5.86E-01 | 1.00E+00 | -0.54 | 2.42E-01 | 7.88E-01 |
| TIGAR      | -0.37 | 5.61E-01 | 1.00E+00 | 0.42  | 2.42E-01 | 7.88E-01 |
| IKZF4      | 0.27  | 4.31E-01 | 1.00E+00 | 0.55  | 2.42E-01 | 7.88E-01 |
| NCMAP      | -0.18 | 7.95E-01 | 1.00E+00 | 1.03  | 2.42E-01 | 7.88E-01 |
| MALL       | -0.26 | 5.25E-01 | 1.00E+00 | 0.28  | 2.42E-01 | 7.88E-01 |
| GOLGA8VP   | -0.53 | 8.77E-01 | 1.00E+00 | -2.10 | 2.42E-01 | 7.88E-01 |
| UACA       | 0.04  | 8.85E-01 | 1.00E+00 | -0.25 | 2.42E-01 | 7.88E-01 |
| ERI3       | -0.23 | 2.10E-01 | 1.00E+00 | -0.21 | 2.42E-01 | 7.88E-01 |
| LINC00324  | 0.06  | 8.17E-01 | 1.00E+00 | -0.43 | 2.42E-01 | 7.88E-01 |
| OR10A6     | 0.90  | 6.37E-01 | 1.00E+00 | -1.36 | 2.42E-01 | 7.88E-01 |
| LRRN3      | 1.04  | 2.39E-01 | 1.00E+00 | -0.82 | 2.42E-01 | 7.88E-01 |
| AC010186.3 | 0.66  | 3.71E-01 | 1.00E+00 | 0.94  | 2.42E-01 | 7.88E-01 |
| G12578     | 0.25  | 6.51E-01 | 1.00E+00 | -1.05 | 2.42E-01 | 7.88E-01 |
| ZNF654     | -0.02 | 9.53E-01 | 1.00E+00 | -0.33 | 2.42E-01 | 7.88E-01 |
| AC007238.1 | 0.02  | 9.83E-01 | 1.00E+00 | -0.55 | 2.42E-01 | 7.88E-01 |
| HEXB       | 0.21  | 3.16E-01 | 1.00E+00 | 0.29  | 2.42E-01 | 7.88E-01 |
| MPRIPP1    | -1.41 | 1.84E-01 | 1.00E+00 | 1.09  | 2.43E-01 | 7.88E-01 |
| LDHB       | 0.74  | 4.58E-01 | 1.00E+00 | -0.84 | 2.43E-01 | 7.88E-01 |
| REPS1      | -0.01 | 9.61E-01 | 1.00E+00 | -0.47 | 2.43E-01 | 7.88E-01 |
| G7666      | 0.33  | 7.29E-01 | 1.00E+00 | 0.83  | 2.43E-01 | 7.88E-01 |
| PPP1R15B   | -0.03 | 9.34E-01 | 1.00E+00 | 0.26  | 2.43E-01 | 7.88E-01 |
| NAXE       | -0.09 | 5.62E-01 | 1.00E+00 | -0.31 | 2.43E-01 | 7.88E-01 |
| CXCL2      | -3.18 | 1.37E-02 | 7.37E-01 | 1.20  | 2.43E-01 | 7.88E-01 |
| TXNRD3     | 0.02  | 9.51E-01 | 1.00E+00 | -0.73 | 2.43E-01 | 7.88E-01 |
| BX890604.2 | -0.33 | 3.54E-01 | 1.00E+00 | -0.56 | 2.43E-01 | 7.89E-01 |
| FAM182B    | -0.67 | 3.94E-01 | 1.00E+00 | -0.80 | 2.43E-01 | 7.89E-01 |
| AP001885.1 | 0.05  | 9.88E-01 | 1.00E+00 | -2.16 | 2.43E-01 | 7.89E-01 |
| ZYX        | -0.39 | 1.55E-01 | 1.00E+00 | 0.67  | 2.43E-01 | 7.89E-01 |
| RAET1L     | 0.04  | 9.50E-01 | 1.00E+00 | 0.79  | 2.43E-01 | 7.89E-01 |

|             |       |          |          |       |          |          |
|-------------|-------|----------|----------|-------|----------|----------|
| TTN         | 0.95  | 4.59E-02 | 1.00E+00 | 0.41  | 2.43E-01 | 7.89E-01 |
| USP32       | 0.05  | 8.82E-01 | 1.00E+00 | 0.56  | 2.43E-01 | 7.89E-01 |
| ATF4        | -0.15 | 5.89E-01 | 1.00E+00 | 0.52  | 2.43E-01 | 7.89E-01 |
| SLBP        | -0.13 | 5.79E-01 | 1.00E+00 | -0.44 | 2.43E-01 | 7.89E-01 |
| AC106827.1  | -0.67 | 8.47E-01 | 1.00E+00 | -1.60 | 2.43E-01 | 7.89E-01 |
| PKIG        | 0.05  | 8.70E-01 | 1.00E+00 | 0.35  | 2.43E-01 | 7.89E-01 |
| PDE10A      | -0.51 | 3.74E-01 | 1.00E+00 | 1.12  | 2.43E-01 | 7.89E-01 |
| COX7A2      | -0.02 | 8.85E-01 | 1.00E+00 | -0.37 | 2.43E-01 | 7.89E-01 |
| ASAH1       | 0.41  | 7.51E-02 | 1.00E+00 | -0.46 | 2.43E-01 | 7.89E-01 |
| CCDC183     | -0.33 | 5.04E-01 | 1.00E+00 | 0.63  | 2.43E-01 | 7.89E-01 |
| GSTK1       | -0.14 | 4.52E-01 | 1.00E+00 | -0.14 | 2.44E-01 | 7.89E-01 |
| ADGRF2      | 0.29  | 5.17E-01 | 1.00E+00 | 0.80  | 2.44E-01 | 7.89E-01 |
| HS3ST4      | -0.65 | 4.99E-01 | 1.00E+00 | -1.39 | 2.44E-01 | 7.89E-01 |
| MYO1E       | -0.27 | 2.84E-01 | 1.00E+00 | 0.44  | 2.44E-01 | 7.89E-01 |
| XLOC_012841 | -0.05 | 9.58E-01 | 1.00E+00 | -1.23 | 2.44E-01 | 7.89E-01 |
| LINC01725   | -0.50 | 2.72E-01 | 1.00E+00 | 0.70  | 2.44E-01 | 7.89E-01 |
| OSBPL3      | -0.06 | 8.64E-01 | 1.00E+00 | 0.37  | 2.44E-01 | 7.90E-01 |
| XLOC_010811 | -2.23 | 2.34E-01 | 1.00E+00 | -1.15 | 2.44E-01 | 7.90E-01 |
| FO XK2      | -0.18 | 4.94E-01 | 1.00E+00 | 0.54  | 2.44E-01 | 7.90E-01 |
| CFAP58      | -1.76 | 2.01E-02 | 8.84E-01 | -1.17 | 2.44E-01 | 7.90E-01 |
| TULP2       | 0.52  | 5.40E-01 | 1.00E+00 | 1.21  | 2.44E-01 | 7.90E-01 |
| EIF1P7      | 0.66  | 8.49E-01 | 1.00E+00 | -0.98 | 2.44E-01 | 7.90E-01 |
| MLLT11      | -0.86 | 1.05E-02 | 6.35E-01 | 0.40  | 2.44E-01 | 7.90E-01 |
| AL139246.3  | -1.29 | 5.01E-01 | 1.00E+00 | -1.72 | 2.44E-01 | 7.90E-01 |
| HPS4        | 0.14  | 5.56E-01 | 1.00E+00 | 0.22  | 2.44E-01 | 7.90E-01 |
| SLC9A1      | -0.22 | 4.79E-01 | 1.00E+00 | 0.66  | 2.44E-01 | 7.90E-01 |
| WDR43       | -0.23 | 3.70E-01 | 1.00E+00 | 0.24  | 2.44E-01 | 7.90E-01 |
| GIMAP1      | 0.33  | 5.11E-01 | 1.00E+00 | 0.60  | 2.44E-01 | 7.90E-01 |
| C4orf33     | 0.25  | 3.73E-01 | 1.00E+00 | 0.32  | 2.44E-01 | 7.90E-01 |
| YWHAZP2     | 0.43  | 7.93E-01 | 1.00E+00 | -0.74 | 2.45E-01 | 7.90E-01 |
| MME         | 2.60  | 6.35E-02 | 1.00E+00 | 1.00  | 2.45E-01 | 7.90E-01 |
| CPQ         | 0.54  | 1.36E-01 | 1.00E+00 | 0.36  | 2.45E-01 | 7.90E-01 |

|            |       |          |          |       |          |          |
|------------|-------|----------|----------|-------|----------|----------|
| WWTR1      | 0.14  | 6.33E-01 | 1.00E+00 | -0.30 | 2.45E-01 | 7.90E-01 |
| AL353625.1 | 0.72  | 2.29E-01 | 1.00E+00 | 1.17  | 2.45E-01 | 7.91E-01 |
| MANCR      | -0.15 | 9.28E-01 | 1.00E+00 | 0.93  | 2.45E-01 | 7.91E-01 |
| ANK1       | -1.30 | 5.01E-03 | 4.15E-01 | 0.94  | 2.45E-01 | 7.91E-01 |
| YES1P1     | -2.05 | 3.27E-01 | 1.00E+00 | 1.17  | 2.45E-01 | 7.91E-01 |
| RPLP0      | -0.20 | 5.69E-01 | 1.00E+00 | 0.34  | 2.45E-01 | 7.91E-01 |
| KIAA0895   | -0.42 | 3.45E-01 | 1.00E+00 | -0.56 | 2.45E-01 | 7.91E-01 |
| KLF16      | -0.51 | 1.77E-01 | 1.00E+00 | 0.73  | 2.45E-01 | 7.91E-01 |
| CCT3       | -0.19 | 3.23E-01 | 1.00E+00 | 0.15  | 2.45E-01 | 7.91E-01 |
| HRAT5      | -1.54 | 1.56E-01 | 1.00E+00 | -1.01 | 2.45E-01 | 7.91E-01 |
| TNPO2      | 0.07  | 6.18E-01 | 1.00E+00 | 0.52  | 2.45E-01 | 7.91E-01 |
| AC141557.1 | -1.60 | 4.02E-02 | 1.00E+00 | -0.54 | 2.45E-01 | 7.91E-01 |
| MED21      | 0.25  | 3.03E-01 | 1.00E+00 | -0.38 | 2.45E-01 | 7.91E-01 |
| ATXN3      | 0.35  | 3.25E-01 | 1.00E+00 | -0.29 | 2.45E-01 | 7.91E-01 |
| PPP6R2     | -0.23 | 1.52E-01 | 1.00E+00 | 0.35  | 2.46E-01 | 7.91E-01 |
| NSD1       | -0.18 | 4.47E-01 | 1.00E+00 | 0.49  | 2.46E-01 | 7.91E-01 |
| AL049840.5 | -1.03 | 7.15E-01 | 1.00E+00 | -1.24 | 2.46E-01 | 7.91E-01 |
| ZNF525     | -0.22 | 5.80E-01 | 1.00E+00 | -0.37 | 2.46E-01 | 7.91E-01 |
| RNF224     | 0.15  | 9.01E-01 | 1.00E+00 | 1.20  | 2.46E-01 | 7.91E-01 |
| RWDD4P2    | 0.02  | 9.61E-01 | 1.00E+00 | -0.33 | 2.46E-01 | 7.91E-01 |
| SHMT2      | -0.20 | 1.97E-01 | 1.00E+00 | 0.26  | 2.46E-01 | 7.91E-01 |
| NDUFC2     | 0.47  | 1.87E-01 | 1.00E+00 | -0.53 | 2.46E-01 | 7.91E-01 |
| AC091729.3 | -0.17 | 7.56E-01 | 1.00E+00 | -0.75 | 2.46E-01 | 7.91E-01 |
| AC127164.1 | 0.33  | 8.86E-01 | 1.00E+00 | 1.37  | 2.46E-01 | 7.91E-01 |
| PRKRA      | -0.13 | 5.08E-01 | 1.00E+00 | -0.46 | 2.46E-01 | 7.91E-01 |
| NAT8L      | 2.12  | 7.64E-02 | 1.00E+00 | 0.99  | 2.46E-01 | 7.91E-01 |
| FAM3A      | 0.02  | 9.44E-01 | 1.00E+00 | 0.30  | 2.46E-01 | 7.91E-01 |
| AC092162.3 | -0.08 | 9.38E-01 | 1.00E+00 | -1.95 | 2.46E-01 | 7.91E-01 |
| RAB8A      | -0.01 | 9.56E-01 | 1.00E+00 | 0.32  | 2.46E-01 | 7.91E-01 |
| AC245140.3 | -2.40 | 2.83E-01 | 1.00E+00 | -1.48 | 2.46E-01 | 7.91E-01 |
| LOX        | 0.76  | 1.55E-01 | 1.00E+00 | 0.58  | 2.46E-01 | 7.91E-01 |
| MEIS3P2    | -0.96 | 1.10E-01 | 1.00E+00 | 1.19  | 2.46E-01 | 7.91E-01 |

|                   |       |          |          |       |          |          |
|-------------------|-------|----------|----------|-------|----------|----------|
| <b>TMPRSS6</b>    | 0.35  | 4.42E-01 | 1.00E+00 | -1.01 | 2.46E-01 | 7.91E-01 |
| <b>AC067817.2</b> | 0.63  | 6.16E-01 | 1.00E+00 | 1.16  | 2.46E-01 | 7.91E-01 |
| <b>TRMT44</b>     | -0.15 | 3.83E-01 | 1.00E+00 | -0.56 | 2.46E-01 | 7.91E-01 |
| <b>AL031666.1</b> | -0.92 | 4.96E-01 | 1.00E+00 | -0.69 | 2.46E-01 | 7.92E-01 |
| <b>COX20</b>      | 0.43  | 5.12E-01 | 1.00E+00 | 0.66  | 2.46E-01 | 7.92E-01 |
| <b>HAUS6</b>      | -0.15 | 5.64E-01 | 1.00E+00 | -0.27 | 2.46E-01 | 7.92E-01 |
| <b>NFAT5</b>      | -0.19 | 4.12E-01 | 1.00E+00 | -0.37 | 2.46E-01 | 7.92E-01 |
| <b>AL606760.1</b> | 0.10  | 9.39E-01 | 1.00E+00 | 0.79  | 2.46E-01 | 7.92E-01 |
| <b>CEP112</b>     | 0.13  | 7.64E-01 | 1.00E+00 | -0.45 | 2.46E-01 | 7.92E-01 |
| <b>MRPL53</b>     | 1.00  | 2.99E-01 | 1.00E+00 | 0.81  | 2.46E-01 | 7.92E-01 |
| <b>PTPN13</b>     | 0.08  | 8.40E-01 | 1.00E+00 | -0.41 | 2.47E-01 | 7.92E-01 |
| <b>FGF14-AS2</b>  | -0.17 | 5.21E-01 | 1.00E+00 | -0.52 | 2.47E-01 | 7.92E-01 |
| <b>TRBV3-1</b>    | -2.42 | 9.67E-02 | 1.00E+00 | 1.02  | 2.47E-01 | 7.92E-01 |
| <b>G43247</b>     | 0.34  | 8.63E-01 | 1.00E+00 | -0.78 | 2.47E-01 | 7.93E-01 |
| <b>LVRN</b>       | 1.64  | 1.02E-02 | 6.27E-01 | -0.92 | 2.47E-01 | 7.93E-01 |
| <b>LGALS12</b>    | 4.12  | 3.05E-02 | 1.00E+00 | -1.17 | 2.47E-01 | 7.93E-01 |
| <b>AL590006.1</b> | 0.56  | 8.71E-01 | 1.00E+00 | 1.15  | 2.47E-01 | 7.93E-01 |
| <b>CMC2</b>       | -0.06 | 8.16E-01 | 1.00E+00 | -0.48 | 2.47E-01 | 7.93E-01 |
| <b>AC092134.1</b> | 2.17  | 6.61E-02 | 1.00E+00 | -1.35 | 2.47E-01 | 7.93E-01 |
| <b>P3H2</b>       | 0.60  | 4.64E-03 | 3.93E-01 | 0.52  | 2.47E-01 | 7.93E-01 |
| <b>CYP2B7P</b>    | 0.84  | 5.20E-01 | 1.00E+00 | -1.34 | 2.47E-01 | 7.93E-01 |
| <b>SUB1</b>       | 0.16  | 5.66E-01 | 1.00E+00 | -0.34 | 2.47E-01 | 7.93E-01 |
| <b>MS4A4E</b>     | -0.82 | 7.20E-01 | 1.00E+00 | 1.09  | 2.47E-01 | 7.93E-01 |
| <b>AC092139.3</b> | -2.42 | 4.78E-01 | 1.00E+00 | 1.41  | 2.47E-01 | 7.93E-01 |
| <b>USPL1</b>      | -0.03 | 9.40E-01 | 1.00E+00 | -0.38 | 2.47E-01 | 7.93E-01 |
| <b>AL391244.3</b> | -0.39 | 5.74E-01 | 1.00E+00 | 1.10  | 2.47E-01 | 7.93E-01 |
| <b>AC090579.1</b> | 0.60  | 2.60E-01 | 1.00E+00 | -0.63 | 2.47E-01 | 7.93E-01 |
| <b>OPN4</b>       | 0.44  | 4.65E-01 | 1.00E+00 | 1.22  | 2.47E-01 | 7.93E-01 |
| <b>RBM17</b>      | 0.06  | 7.29E-01 | 1.00E+00 | -0.13 | 2.47E-01 | 7.93E-01 |
| <b>TMED1</b>      | -0.11 | 7.34E-01 | 1.00E+00 | 0.35  | 2.47E-01 | 7.93E-01 |
| <b>VRK1</b>       | -0.16 | 5.33E-01 | 1.00E+00 | -0.39 | 2.47E-01 | 7.93E-01 |
| <b>MYH11</b>      | -0.21 | 7.60E-01 | 1.00E+00 | -0.73 | 2.47E-01 | 7.93E-01 |

|                    |       |          |          |       |          |          |
|--------------------|-------|----------|----------|-------|----------|----------|
| <b>AC084262.1</b>  | 0.64  | 7.51E-01 | 1.00E+00 | -1.65 | 2.48E-01 | 7.93E-01 |
| <b>MOGAT2</b>      | -0.61 | 4.22E-01 | 1.00E+00 | -0.95 | 2.48E-01 | 7.93E-01 |
| <b>FCN2</b>        | 1.61  | 2.81E-01 | 1.00E+00 | -2.05 | 2.48E-01 | 7.93E-01 |
| <b>LYSMD1</b>      | 0.18  | 5.16E-01 | 1.00E+00 | 0.62  | 2.48E-01 | 7.93E-01 |
| <b>MLST8</b>       | -0.14 | 5.40E-01 | 1.00E+00 | 0.13  | 2.48E-01 | 7.93E-01 |
| <b>ZNF438</b>      | 0.00  | 9.95E-01 | 1.00E+00 | 0.24  | 2.48E-01 | 7.93E-01 |
| <b>MRPL47</b>      | -0.24 | 2.75E-01 | 1.00E+00 | -0.27 | 2.48E-01 | 7.93E-01 |
| <b>LINC00707</b>   | -2.55 | 2.20E-01 | 1.00E+00 | 1.43  | 2.48E-01 | 7.93E-01 |
| <b>TRIL</b>        | 0.11  | 8.24E-01 | 1.00E+00 | 0.72  | 2.48E-01 | 7.93E-01 |
| <b>IL18BP</b>      | -0.54 | 1.93E-01 | 1.00E+00 | 0.70  | 2.48E-01 | 7.93E-01 |
| <b>AC046185.3</b>  | -1.03 | 6.80E-02 | 1.00E+00 | 1.08  | 2.48E-01 | 7.93E-01 |
| <b>MAD2L1BP</b>    | -0.01 | 9.77E-01 | 1.00E+00 | 0.20  | 2.48E-01 | 7.93E-01 |
| <b>MDGA1</b>       | -1.25 | 1.15E-01 | 1.00E+00 | 0.80  | 2.48E-01 | 7.93E-01 |
| <b>L3MBTL4-AS1</b> | -1.19 | 3.60E-01 | 1.00E+00 | 1.02  | 2.48E-01 | 7.93E-01 |
| <b>IRF2BP2</b>     | -0.32 | 1.08E-01 | 1.00E+00 | 0.28  | 2.48E-01 | 7.93E-01 |
| <b>PER3</b>        | -0.79 | 2.62E-03 | 2.64E-01 | -0.37 | 2.48E-01 | 7.93E-01 |
| <b>SLC2A13</b>     | -0.08 | 8.02E-01 | 1.00E+00 | -0.64 | 2.48E-01 | 7.93E-01 |
| <b>PDCD10</b>      | 0.11  | 6.60E-01 | 1.00E+00 | -0.42 | 2.48E-01 | 7.93E-01 |
| <b>IMPG1</b>       | -0.82 | 6.54E-01 | 1.00E+00 | -1.47 | 2.48E-01 | 7.93E-01 |
| <b>MAL</b>         | -0.44 | 2.64E-01 | 1.00E+00 | -0.52 | 2.48E-01 | 7.93E-01 |
| <b>AC007406.5</b>  | 0.43  | 2.71E-01 | 1.00E+00 | -0.59 | 2.48E-01 | 7.93E-01 |
| <b>HIPK3</b>       | 0.11  | 4.86E-01 | 1.00E+00 | -0.26 | 2.48E-01 | 7.93E-01 |
| <b>RIBC2</b>       | -0.46 | 4.62E-01 | 1.00E+00 | 0.91  | 2.48E-01 | 7.93E-01 |
| <b>PTMAP4</b>      | -0.14 | 7.78E-01 | 1.00E+00 | -0.43 | 2.48E-01 | 7.93E-01 |
| <b>CCDC183-AS1</b> | -3.07 | 6.11E-03 | 4.63E-01 | 1.20  | 2.48E-01 | 7.93E-01 |
| <b>FAM174B</b>     | 0.25  | 6.12E-01 | 1.00E+00 | -0.56 | 2.48E-01 | 7.93E-01 |
| <b>GCOM1</b>       | 0.32  | 6.01E-01 | 1.00E+00 | 0.38  | 2.48E-01 | 7.93E-01 |
| <b>N4BP2L1</b>     | 0.18  | 3.92E-01 | 1.00E+00 | -0.38 | 2.48E-01 | 7.93E-01 |
| <b>SLC15A2</b>     | 0.53  | 4.91E-01 | 1.00E+00 | 0.92  | 2.49E-01 | 7.94E-01 |
| <b>DHCR7</b>       | -0.26 | 5.34E-01 | 1.00E+00 | -0.38 | 2.49E-01 | 7.94E-01 |
| <b>NPIP4</b>       | 0.72  | 2.19E-01 | 1.00E+00 | 0.58  | 2.49E-01 | 7.94E-01 |
| <b>AL122035.1</b>  | -0.02 | 9.75E-01 | 1.00E+00 | -0.58 | 2.49E-01 | 7.94E-01 |

|                    |       |          |          |       |          |          |
|--------------------|-------|----------|----------|-------|----------|----------|
| <b>GPR146</b>      | -0.31 | 4.08E-01 | 1.00E+00 | -0.58 | 2.49E-01 | 7.94E-01 |
| <b>MIRLET7BHG</b>  | 0.57  | 3.29E-01 | 1.00E+00 | 0.54  | 2.49E-01 | 7.94E-01 |
| <b>XLOC_002951</b> | -1.09 | 4.14E-01 | 1.00E+00 | 1.40  | 2.49E-01 | 7.94E-01 |
| <b>AC002467.1</b>  | -0.42 | 5.39E-01 | 1.00E+00 | -0.43 | 2.49E-01 | 7.94E-01 |
| <b>ZNF37BP</b>     | -0.13 | 7.18E-01 | 1.00E+00 | -0.53 | 2.49E-01 | 7.94E-01 |
| <b>AC009113.1</b>  | 0.27  | 3.13E-01 | 1.00E+00 | -0.45 | 2.49E-01 | 7.94E-01 |
| <b>COL18A1</b>     | -0.66 | 6.16E-02 | 1.00E+00 | 1.00  | 2.49E-01 | 7.94E-01 |
| <b>XLOC_003284</b> | -1.13 | 5.17E-01 | 1.00E+00 | -1.55 | 2.49E-01 | 7.94E-01 |
| <b>GTSE1-DT</b>    | -2.32 | 1.13E-02 | 6.59E-01 | -1.14 | 2.49E-01 | 7.94E-01 |
| <b>ANKRD18EP</b>   | -0.13 | 6.57E-01 | 1.00E+00 | 0.51  | 2.49E-01 | 7.94E-01 |
| <b>MVP</b>         | -0.21 | 4.49E-01 | 1.00E+00 | 0.50  | 2.49E-01 | 7.94E-01 |
| <b>LINC02432</b>   | -3.55 | 3.23E-02 | 1.00E+00 | -1.43 | 2.49E-01 | 7.95E-01 |
| <b>LEP</b>         | 5.30  | 7.44E-03 | 5.24E-01 | -1.16 | 2.49E-01 | 7.95E-01 |
| <b>MCRIP1</b>      | 0.00  | 9.90E-01 | 1.00E+00 | 0.42  | 2.49E-01 | 7.95E-01 |
| <b>AC083862.2</b>  | 1.50  | 5.65E-01 | 1.00E+00 | 1.38  | 2.49E-01 | 7.95E-01 |
| <b>MB</b>          | -0.16 | 8.44E-01 | 1.00E+00 | -0.70 | 2.50E-01 | 7.95E-01 |
| <b>LAP3</b>        | 0.04  | 8.97E-01 | 1.00E+00 | 0.45  | 2.50E-01 | 7.95E-01 |
| <b>ITGA7</b>       | 0.89  | 2.04E-01 | 1.00E+00 | 0.90  | 2.50E-01 | 7.95E-01 |
| <b>HTR1B</b>       | -2.46 | 4.60E-02 | 1.00E+00 | 2.03  | 2.50E-01 | 7.95E-01 |
| <b>AC026470.2</b>  | -1.59 | 2.50E-01 | 1.00E+00 | 0.83  | 2.50E-01 | 7.95E-01 |
| <b>PDIA3P1</b>     | -0.47 | 1.47E-01 | 1.00E+00 | -0.27 | 2.50E-01 | 7.95E-01 |
| <b>AC016949.1</b>  | -2.56 | 1.19E-01 | 1.00E+00 | 0.81  | 2.50E-01 | 7.95E-01 |
| <b>RBM18</b>       | 0.11  | 6.09E-01 | 1.00E+00 | -0.23 | 2.50E-01 | 7.95E-01 |
| <b>AC016705.2</b>  | -3.49 | 5.54E-03 | 4.41E-01 | 1.99  | 2.50E-01 | 7.95E-01 |
| <b>FBXO2</b>       | -0.16 | 6.22E-01 | 1.00E+00 | -0.68 | 2.50E-01 | 7.95E-01 |
| <b>VPS37A</b>      | 0.27  | 1.47E-01 | 1.00E+00 | -0.24 | 2.50E-01 | 7.95E-01 |
| <b>RAD52</b>       | 0.43  | 2.31E-01 | 1.00E+00 | 0.35  | 2.50E-01 | 7.95E-01 |
| <b>TGFBR1</b>      | 0.36  | 2.62E-01 | 1.00E+00 | 0.35  | 2.50E-01 | 7.95E-01 |
| <b>AKAP1</b>       | -0.16 | 4.43E-01 | 1.00E+00 | -0.42 | 2.50E-01 | 7.95E-01 |
| <b>RCE1</b>        | 0.01  | 9.82E-01 | 1.00E+00 | 0.23  | 2.50E-01 | 7.95E-01 |
| <b>UCP2</b>        | 0.24  | 5.74E-01 | 1.00E+00 | 0.53  | 2.50E-01 | 7.95E-01 |
| <b>ANKIB1</b>      | 0.01  | 9.59E-01 | 1.00E+00 | 0.40  | 2.50E-01 | 7.95E-01 |

|             |       |          |          |       |          |          |
|-------------|-------|----------|----------|-------|----------|----------|
| GABRE       | 1.68  | 2.37E-02 | 9.15E-01 | -0.66 | 2.50E-01 | 7.95E-01 |
| CUTALP      | 0.40  | 1.27E-01 | 1.00E+00 | 0.31  | 2.50E-01 | 7.95E-01 |
| TRIB2       | -0.03 | 9.34E-01 | 1.00E+00 | 0.47  | 2.50E-01 | 7.95E-01 |
| PIGH        | -0.04 | 8.70E-01 | 1.00E+00 | -0.46 | 2.50E-01 | 7.95E-01 |
| AL442125.1  | -1.39 | 8.21E-02 | 1.00E+00 | -1.27 | 2.50E-01 | 7.95E-01 |
| MYC         | -1.18 | 1.26E-01 | 1.00E+00 | 0.49  | 2.50E-01 | 7.95E-01 |
| IGHG3       | 4.08  | 4.02E-02 | 1.00E+00 | 3.60  | 2.50E-01 | 7.95E-01 |
| TRAV10      | 0.52  | 8.74E-01 | 1.00E+00 | 2.06  | 2.50E-01 | 7.95E-01 |
| INCENP      | -0.11 | 5.50E-01 | 1.00E+00 | 0.99  | 2.50E-01 | 7.95E-01 |
| C15orf61    | -0.17 | 6.09E-01 | 1.00E+00 | -0.49 | 2.50E-01 | 7.95E-01 |
| CRYBG3      | 0.08  | 8.03E-01 | 1.00E+00 | -0.35 | 2.50E-01 | 7.95E-01 |
| MGAT2       | -0.20 | 8.50E-01 | 1.00E+00 | 0.60  | 2.51E-01 | 7.95E-01 |
| GLRX3P2     | NA    | NA       | NA       | 0.97  | 2.51E-01 | 7.95E-01 |
| XLOC_012471 | -0.24 | 9.45E-01 | 1.00E+00 | -1.62 | 2.51E-01 | 7.95E-01 |
| KIAA0930    | -0.20 | 4.79E-01 | 1.00E+00 | 0.51  | 2.51E-01 | 7.95E-01 |
| HOOK3       | -0.10 | 5.57E-01 | 1.00E+00 | -0.26 | 2.51E-01 | 7.95E-01 |
| IL17RB      | -0.30 | 5.52E-01 | 1.00E+00 | -0.61 | 2.51E-01 | 7.95E-01 |
| CMC1        | 0.04  | 8.72E-01 | 1.00E+00 | -0.46 | 2.51E-01 | 7.95E-01 |
| ZBTB8A      | -0.13 | 7.31E-01 | 1.00E+00 | 0.47  | 2.51E-01 | 7.95E-01 |
| AASDHPPT    | 0.12  | 6.08E-01 | 1.00E+00 | -0.36 | 2.51E-01 | 7.95E-01 |
| MCMDC2      | -0.02 | 9.73E-01 | 1.00E+00 | 0.53  | 2.51E-01 | 7.95E-01 |
| JKAMP       | 0.14  | 5.10E-01 | 1.00E+00 | -0.48 | 2.51E-01 | 7.95E-01 |
| DONSON      | -0.63 | 9.07E-02 | 1.00E+00 | 0.49  | 2.51E-01 | 7.95E-01 |
| GOLGA2P5    | -0.78 | 2.84E-01 | 1.00E+00 | 1.18  | 2.51E-01 | 7.95E-01 |
| G13213      | -0.17 | 9.61E-01 | 1.00E+00 | 1.04  | 2.51E-01 | 7.95E-01 |
| ZNF273      | 0.33  | 3.41E-01 | 1.00E+00 | -0.41 | 2.51E-01 | 7.95E-01 |
| SCNN1B      | -0.24 | 4.13E-01 | 1.00E+00 | -0.38 | 2.51E-01 | 7.95E-01 |
| ADAM28      | -0.48 | 3.31E-01 | 1.00E+00 | 0.70  | 2.51E-01 | 7.95E-01 |
| FAM43B      | -0.12 | 8.89E-01 | 1.00E+00 | 1.22  | 2.51E-01 | 7.95E-01 |
| AC105020.1  | -2.22 | 1.17E-01 | 1.00E+00 | 1.77  | 2.51E-01 | 7.95E-01 |
| ASB12       | -1.22 | 3.84E-01 | 1.00E+00 | -1.21 | 2.51E-01 | 7.95E-01 |
| PYGO1       | 0.74  | 1.72E-02 | 8.26E-01 | 0.52  | 2.51E-01 | 7.95E-01 |

|             |        |          |          |       |          |          |
|-------------|--------|----------|----------|-------|----------|----------|
| ABRA        | -15.88 | 3.35E-06 | 1.14E-03 | -1.74 | 2.51E-01 | 7.95E-01 |
| AL354836.1  | -0.27  | 7.56E-01 | 1.00E+00 | 1.00  | 2.51E-01 | 7.95E-01 |
| LAMA4       | 0.54   | 2.49E-01 | 1.00E+00 | 0.55  | 2.51E-01 | 7.95E-01 |
| CAAP1       | -0.03  | 8.99E-01 | 1.00E+00 | -0.23 | 2.52E-01 | 7.95E-01 |
| TRIM62      | -0.56  | 2.04E-01 | 1.00E+00 | 0.53  | 2.52E-01 | 7.95E-01 |
| AC005019.1  | NA     | NA       | NA       | -0.97 | 2.52E-01 | 7.95E-01 |
| DZIP3       | -0.06  | 8.32E-01 | 1.00E+00 | -0.34 | 2.52E-01 | 7.95E-01 |
| UBR7        | 0.10   | 5.81E-01 | 1.00E+00 | -0.23 | 2.52E-01 | 7.95E-01 |
| NKX2-8      | 0.06   | 9.58E-01 | 1.00E+00 | -1.83 | 2.52E-01 | 7.95E-01 |
| AC087752.4  | -1.32  | 4.09E-01 | 1.00E+00 | -1.28 | 2.52E-01 | 7.95E-01 |
| AL163051.2  | 0.54   | 5.93E-01 | 1.00E+00 | -0.92 | 2.52E-01 | 7.95E-01 |
| RFFL        | 0.00   | 9.97E-01 | 1.00E+00 | 0.42  | 2.52E-01 | 7.95E-01 |
| CRY2        | -0.39  | 1.87E-01 | 1.00E+00 | -0.37 | 2.52E-01 | 7.95E-01 |
| FAM149B1    | 0.26   | 1.83E-01 | 1.00E+00 | 0.30  | 2.52E-01 | 7.95E-01 |
| NBEAL2      | -0.02  | 9.68E-01 | 1.00E+00 | 1.03  | 2.52E-01 | 7.95E-01 |
| ELMSAN1     | -0.37  | 1.66E-01 | 1.00E+00 | 0.30  | 2.52E-01 | 7.95E-01 |
| RBL1        | -0.23  | 4.25E-01 | 1.00E+00 | -0.41 | 2.52E-01 | 7.95E-01 |
| TOX         | -0.32  | 4.51E-01 | 1.00E+00 | 0.54  | 2.52E-01 | 7.95E-01 |
| NFKB2       | -0.26  | 3.45E-01 | 1.00E+00 | 0.93  | 2.52E-01 | 7.95E-01 |
| ZIC4        | 1.07   | 4.88E-01 | 1.00E+00 | 1.56  | 2.52E-01 | 7.95E-01 |
| ING4        | 0.09   | 6.58E-01 | 1.00E+00 | -0.20 | 2.52E-01 | 7.95E-01 |
| ZCCHC10     | 0.07   | 8.22E-01 | 1.00E+00 | -0.44 | 2.52E-01 | 7.95E-01 |
| ZDHHC3      | 0.05   | 8.34E-01 | 1.00E+00 | -0.37 | 2.52E-01 | 7.95E-01 |
| EXT2        | 0.05   | 7.69E-01 | 1.00E+00 | 0.35  | 2.52E-01 | 7.96E-01 |
| XLOC_006721 | -0.68  | 1.43E-01 | 1.00E+00 | -0.48 | 2.52E-01 | 7.96E-01 |
| XLOC_009350 | -0.74  | 2.81E-02 | 9.75E-01 | -0.84 | 2.52E-01 | 7.96E-01 |
| KIAA0319L   | -0.01  | 9.55E-01 | 1.00E+00 | 0.34  | 2.52E-01 | 7.96E-01 |
| ADNP        | -0.06  | 7.84E-01 | 1.00E+00 | 0.28  | 2.52E-01 | 7.96E-01 |
| FBXO40      | 0.31   | 7.74E-01 | 1.00E+00 | -1.99 | 2.52E-01 | 7.96E-01 |
| LINC01505   | -1.09  | 4.79E-01 | 1.00E+00 | 1.56  | 2.52E-01 | 7.96E-01 |
| G19167      | -3.90  | 7.66E-02 | 1.00E+00 | 1.52  | 2.52E-01 | 7.96E-01 |
| RXRG        | -0.35  | 4.38E-01 | 1.00E+00 | 0.53  | 2.53E-01 | 7.96E-01 |



|                    |       |          |          |       |          |          |
|--------------------|-------|----------|----------|-------|----------|----------|
| <b>DLL1</b>        | -0.27 | 4.47E-01 | 1.00E+00 | 0.44  | 2.53E-01 | 7.96E-01 |
| <b>TAF7</b>        | 0.13  | 4.42E-01 | 1.00E+00 | -0.20 | 2.53E-01 | 7.96E-01 |
| <b>G4640</b>       | -1.67 | 2.95E-01 | 1.00E+00 | 1.35  | 2.53E-01 | 7.96E-01 |
| <b>REN</b>         | -0.74 | 8.31E-01 | 1.00E+00 | 3.00  | 2.53E-01 | 7.96E-01 |
| <b>CREG2</b>       | -4.79 | 3.13E-06 | 1.09E-03 | 1.37  | 2.53E-01 | 7.96E-01 |
| <b>ATXN10</b>      | 0.17  | 2.13E-01 | 1.00E+00 | -0.31 | 2.53E-01 | 7.96E-01 |
| <b>AGTR1</b>       | 1.34  | 3.49E-02 | 1.00E+00 | -0.79 | 2.53E-01 | 7.96E-01 |
| <b>AC103702.2</b>  | -3.18 | 3.47E-01 | 1.00E+00 | 1.36  | 2.53E-01 | 7.96E-01 |
| <b>RN7SK</b>       | 0.18  | 6.00E-01 | 1.00E+00 | -0.69 | 2.53E-01 | 7.96E-01 |
| <b>TMEM198</b>     | -0.87 | 5.10E-02 | 1.00E+00 | 0.65  | 2.53E-01 | 7.97E-01 |
| <b>LOXL1-AS1</b>   | -0.03 | 9.59E-01 | 1.00E+00 | -0.36 | 2.53E-01 | 7.97E-01 |
| <b>RCN1P2</b>      | 0.92  | 2.70E-01 | 1.00E+00 | -0.60 | 2.53E-01 | 7.97E-01 |
| <b>FAM98A</b>      | -0.13 | 5.21E-01 | 1.00E+00 | 0.23  | 2.53E-01 | 7.97E-01 |
| <b>AC022706.1</b>  | 0.54  | 4.84E-01 | 1.00E+00 | 0.56  | 2.53E-01 | 7.97E-01 |
| <b>CCDC124</b>     | -0.28 | 2.74E-01 | 1.00E+00 | 0.29  | 2.53E-01 | 7.97E-01 |
| <b>AC005005.4</b>  | -0.40 | 8.24E-01 | 1.00E+00 | 1.18  | 2.54E-01 | 7.97E-01 |
| <b>ZNF783</b>      | 0.05  | 8.72E-01 | 1.00E+00 | 0.61  | 2.54E-01 | 7.97E-01 |
| <b>CDRT15P1</b>    | 1.04  | 3.93E-01 | 1.00E+00 | 1.73  | 2.54E-01 | 7.97E-01 |
| <b>AL137002.2</b>  | -1.26 | 1.06E-01 | 1.00E+00 | 0.97  | 2.54E-01 | 7.97E-01 |
| <b>AL023581.2</b>  | 3.06  | 1.10E-01 | 1.00E+00 | -0.79 | 2.54E-01 | 7.97E-01 |
| <b>RPA3</b>        | 0.39  | 6.69E-02 | 1.00E+00 | -0.42 | 2.54E-01 | 7.98E-01 |
| <b>KSR2</b>        | 0.21  | 8.77E-01 | 1.00E+00 | -1.03 | 2.54E-01 | 7.98E-01 |
| <b>THEGL</b>       | -0.02 | 9.84E-01 | 1.00E+00 | 1.03  | 2.54E-01 | 7.98E-01 |
| <b>SCHIP1</b>      | 0.17  | 8.89E-01 | 1.00E+00 | -1.05 | 2.54E-01 | 7.98E-01 |
| <b>LYPLA1</b>      | 0.03  | 9.43E-01 | 1.00E+00 | -0.42 | 2.54E-01 | 7.98E-01 |
| <b>ZFP14</b>       | 0.18  | 7.45E-01 | 1.00E+00 | -0.38 | 2.54E-01 | 7.98E-01 |
| <b>LY6G5B</b>      | -0.53 | 7.22E-01 | 1.00E+00 | 1.40  | 2.54E-01 | 7.98E-01 |
| <b>XLOC_007800</b> | 0.78  | 4.27E-01 | 1.00E+00 | -0.87 | 2.54E-01 | 7.98E-01 |
| <b>G38146</b>      | -0.15 | 9.13E-01 | 1.00E+00 | 1.32  | 2.54E-01 | 7.98E-01 |
| <b>AC015922.3</b>  | 0.83  | 1.32E-01 | 1.00E+00 | 0.60  | 2.54E-01 | 7.98E-01 |
| <b>COX16</b>       | 0.49  | 2.14E-01 | 1.00E+00 | -0.53 | 2.54E-01 | 7.98E-01 |
| <b>GGPS1</b>       | -0.03 | 9.05E-01 | 1.00E+00 | -0.47 | 2.54E-01 | 7.98E-01 |

|             |       |          |          |       |          |          |
|-------------|-------|----------|----------|-------|----------|----------|
| PDGFRA      | 0.66  | 5.63E-02 | 1.00E+00 | 0.51  | 2.54E-01 | 7.98E-01 |
| ZCCHC8      | 0.17  | 5.56E-01 | 1.00E+00 | 0.45  | 2.55E-01 | 7.98E-01 |
| PLA2G15     | 0.07  | 7.93E-01 | 1.00E+00 | 0.33  | 2.55E-01 | 7.98E-01 |
| DHPS        | -0.29 | 8.73E-01 | 1.00E+00 | 0.83  | 2.55E-01 | 7.98E-01 |
| TIMM8B      | 0.03  | 8.79E-01 | 1.00E+00 | -0.45 | 2.55E-01 | 7.98E-01 |
| AL133215.2  | -1.21 | 1.64E-01 | 1.00E+00 | -1.14 | 2.55E-01 | 7.98E-01 |
| AC099343.2  | -0.28 | 8.02E-01 | 1.00E+00 | 1.54  | 2.55E-01 | 7.98E-01 |
| SNX6        | 0.14  | 5.31E-01 | 1.00E+00 | -0.22 | 2.55E-01 | 7.98E-01 |
| TUBB        | -0.17 | 4.53E-01 | 1.00E+00 | 0.23  | 2.55E-01 | 7.98E-01 |
| PPP6C       | 0.27  | 1.59E-01 | 1.00E+00 | -0.18 | 2.55E-01 | 7.98E-01 |
| CHCHD2P2    | 2.04  | 2.25E-01 | 1.00E+00 | 0.97  | 2.55E-01 | 7.99E-01 |
| LINC01515   | 0.10  | 7.91E-01 | 1.00E+00 | -0.63 | 2.55E-01 | 7.99E-01 |
| RPS3AP5     | 0.07  | 9.18E-01 | 1.00E+00 | -0.58 | 2.55E-01 | 7.99E-01 |
| SOCS5       | -0.04 | 8.54E-01 | 1.00E+00 | 0.30  | 2.55E-01 | 7.99E-01 |
| XLOC_011119 | 1.54  | 6.44E-01 | 1.00E+00 | 1.58  | 2.55E-01 | 7.99E-01 |
| PSPH        | -0.03 | 9.44E-01 | 1.00E+00 | 0.29  | 2.55E-01 | 7.99E-01 |
| TAOK1       | -0.01 | 9.49E-01 | 1.00E+00 | 0.26  | 2.55E-01 | 7.99E-01 |
| IREB2       | 0.15  | 4.44E-01 | 1.00E+00 | 0.26  | 2.55E-01 | 7.99E-01 |
| TRAV2       | -0.73 | 7.05E-01 | 1.00E+00 | 1.82  | 2.55E-01 | 7.99E-01 |
| MST1L       | -0.57 | 4.14E-01 | 1.00E+00 | 1.01  | 2.55E-01 | 7.99E-01 |
| CALHM2      | 0.15  | 6.90E-01 | 1.00E+00 | 0.58  | 2.55E-01 | 7.99E-01 |
| CNPY4       | 0.09  | 7.93E-01 | 1.00E+00 | 0.42  | 2.55E-01 | 7.99E-01 |
| TTC14       | 0.17  | 6.03E-01 | 1.00E+00 | -0.31 | 2.55E-01 | 7.99E-01 |
| AC087645.2  | -2.21 | 4.59E-02 | 1.00E+00 | 1.03  | 2.55E-01 | 7.99E-01 |
| CPEB4       | -0.04 | 8.77E-01 | 1.00E+00 | 0.27  | 2.55E-01 | 7.99E-01 |
| AC019254.1  | -2.71 | 4.25E-01 | 1.00E+00 | 1.10  | 2.55E-01 | 7.99E-01 |
| G7779       | -1.17 | 6.94E-01 | 1.00E+00 | 2.10  | 2.55E-01 | 7.99E-01 |
| SEC14L1     | 0.22  | 5.51E-01 | 1.00E+00 | 0.62  | 2.56E-01 | 7.99E-01 |
| TARBP2      | -0.08 | 7.14E-01 | 1.00E+00 | 0.28  | 2.56E-01 | 7.99E-01 |
| SCML2       | 0.11  | 7.60E-01 | 1.00E+00 | -0.67 | 2.56E-01 | 7.99E-01 |
| RNU6-531P   | -0.72 | 5.97E-01 | 1.00E+00 | 1.19  | 2.56E-01 | 7.99E-01 |
| NAT16       | -1.66 | 4.94E-01 | 1.00E+00 | 2.15  | 2.56E-01 | 7.99E-01 |

|            |       |          |          |       |          |          |
|------------|-------|----------|----------|-------|----------|----------|
| LINC02005  | -0.85 | 7.52E-01 | 1.00E+00 | 1.94  | 2.56E-01 | 7.99E-01 |
| AC245140.2 | -0.10 | 9.49E-01 | 1.00E+00 | 0.83  | 2.56E-01 | 7.99E-01 |
| AC016405.1 | -2.36 | 1.21E-01 | 1.00E+00 | -0.96 | 2.56E-01 | 7.99E-01 |
| AC002456.1 | 0.44  | 8.99E-01 | 1.00E+00 | -1.32 | 2.56E-01 | 7.99E-01 |
| G6968      | 0.35  | 9.15E-01 | 1.00E+00 | -1.30 | 2.56E-01 | 7.99E-01 |
| FLJ31104   | -0.86 | 5.70E-01 | 1.00E+00 | 0.85  | 2.56E-01 | 7.99E-01 |
| G35257     | 0.57  | 7.22E-01 | 1.00E+00 | -1.07 | 2.56E-01 | 7.99E-01 |
| VPS37C     | -0.23 | 3.53E-01 | 1.00E+00 | 0.42  | 2.56E-01 | 7.99E-01 |
| MRGPRF     | -0.15 | 6.44E-01 | 1.00E+00 | 0.60  | 2.56E-01 | 7.99E-01 |
| ANXA8      | -0.20 | 5.70E-01 | 1.00E+00 | -0.75 | 2.56E-01 | 7.99E-01 |
| B4GALNT3   | 0.06  | 8.77E-01 | 1.00E+00 | 0.80  | 2.56E-01 | 7.99E-01 |
| CLEC4C     | -3.48 | 7.15E-02 | 1.00E+00 | 1.85  | 2.56E-01 | 7.99E-01 |
| UBE3B      | 0.11  | 5.02E-01 | 1.00E+00 | -0.22 | 2.56E-01 | 7.99E-01 |
| LINC02595  | -0.85 | 3.71E-01 | 1.00E+00 | 0.69  | 2.56E-01 | 7.99E-01 |
| ETS1       | 0.11  | 7.38E-01 | 1.00E+00 | 0.88  | 2.56E-01 | 7.99E-01 |
| NAT14      | -0.38 | 2.12E-01 | 1.00E+00 | 0.95  | 2.56E-01 | 7.99E-01 |
| ZNF717     | 0.41  | 1.26E-01 | 1.00E+00 | -0.39 | 2.56E-01 | 7.99E-01 |
| QPCTL      | -0.46 | 2.03E-01 | 1.00E+00 | 0.51  | 2.56E-01 | 7.99E-01 |
| BHMT2      | 0.70  | 1.97E-01 | 1.00E+00 | -0.79 | 2.56E-01 | 7.99E-01 |
| FRG2HP     | 0.27  | 5.70E-01 | 1.00E+00 | -0.85 | 2.56E-01 | 7.99E-01 |
| EIF5B      | -0.03 | 8.88E-01 | 1.00E+00 | 0.33  | 2.56E-01 | 7.99E-01 |
| ATP8A2     | -1.35 | 3.27E-02 | 1.00E+00 | 0.68  | 2.57E-01 | 7.99E-01 |
| CCRL2      | 0.71  | 4.54E-01 | 1.00E+00 | 0.70  | 2.57E-01 | 7.99E-01 |
| INSIG2     | 0.45  | 1.66E-01 | 1.00E+00 | -0.41 | 2.57E-01 | 7.99E-01 |
| BOLA3-AS1  | 0.38  | 3.48E-01 | 1.00E+00 | -0.52 | 2.57E-01 | 7.99E-01 |
| RNU6-925P  | -2.01 | 1.55E-01 | 1.00E+00 | -1.10 | 2.57E-01 | 8.00E-01 |
| MBD2       | 0.15  | 4.86E-01 | 1.00E+00 | -0.58 | 2.57E-01 | 8.00E-01 |
| AL031846.1 | -2.86 | 4.02E-01 | 1.00E+00 | 2.06  | 2.57E-01 | 8.00E-01 |
| EPS15L1    | -0.21 | 3.65E-01 | 1.00E+00 | 0.28  | 2.57E-01 | 8.00E-01 |
| ZDHC8      | -0.20 | 4.39E-01 | 1.00E+00 | 0.63  | 2.57E-01 | 8.00E-01 |
| EXOSC3     | 0.29  | 3.47E-01 | 1.00E+00 | -0.36 | 2.57E-01 | 8.00E-01 |
| DCLRE1B    | -0.08 | 6.86E-01 | 1.00E+00 | 0.37  | 2.57E-01 | 8.00E-01 |

|                   |       |          |          |       |          |          |
|-------------------|-------|----------|----------|-------|----------|----------|
| <b>G31133</b>     | 0.44  | 6.92E-01 | 1.00E+00 | 1.14  | 2.57E-01 | 8.00E-01 |
| <b>KCNK17</b>     | -0.76 | 7.81E-01 | 1.00E+00 | 1.91  | 2.57E-01 | 8.00E-01 |
| <b>NEFM</b>       | -3.62 | 3.72E-03 | 3.33E-01 | 1.14  | 2.57E-01 | 8.00E-01 |
| <b>C8orf44</b>    | 0.13  | 8.17E-01 | 1.00E+00 | -0.46 | 2.57E-01 | 8.00E-01 |
| <b>ZNF605</b>     | -0.04 | 9.08E-01 | 1.00E+00 | 0.35  | 2.57E-01 | 8.00E-01 |
| <b>SCARNA5</b>    | -0.67 | 8.47E-01 | 1.00E+00 | -1.29 | 2.57E-01 | 8.00E-01 |
| <b>SIPA1L1</b>    | -0.37 | 1.01E-01 | 1.00E+00 | 0.35  | 2.57E-01 | 8.00E-01 |
| <b>SPIB</b>       | -2.78 | 3.35E-02 | 1.00E+00 | 1.78  | 2.57E-01 | 8.00E-01 |
| <b>G18713</b>     | -0.75 | 6.13E-01 | 1.00E+00 | 0.85  | 2.57E-01 | 8.00E-01 |
| <b>INA</b>        | -1.58 | 7.36E-03 | 5.21E-01 | 1.16  | 2.58E-01 | 8.00E-01 |
| <b>PEBP4</b>      | -0.08 | 9.13E-01 | 1.00E+00 | -0.61 | 2.58E-01 | 8.00E-01 |
| <b>GK</b>         | -0.05 | 8.95E-01 | 1.00E+00 | 0.43  | 2.58E-01 | 8.00E-01 |
| <b>ODF3L1</b>     | 0.28  | 5.89E-01 | 1.00E+00 | -0.59 | 2.58E-01 | 8.00E-01 |
| <b>KLRG2</b>      | -0.51 | 8.36E-02 | 1.00E+00 | -0.99 | 2.58E-01 | 8.00E-01 |
| <b>OVOL2</b>      | 0.04  | 9.04E-01 | 1.00E+00 | -0.76 | 2.58E-01 | 8.00E-01 |
| <b>LINC02044</b>  | 0.79  | 6.27E-01 | 1.00E+00 | -1.46 | 2.58E-01 | 8.00E-01 |
| <b>ZC2HC1A</b>    | 0.02  | 9.53E-01 | 1.00E+00 | -0.58 | 2.58E-01 | 8.00E-01 |
| <b>CR381670.1</b> | 1.16  | 3.79E-01 | 1.00E+00 | -0.90 | 2.58E-01 | 8.00E-01 |
| <b>POLR2C</b>     | 0.02  | 9.12E-01 | 1.00E+00 | 0.21  | 2.58E-01 | 8.00E-01 |
| <b>CDK10</b>      | -0.14 | 6.67E-01 | 1.00E+00 | 0.20  | 2.58E-01 | 8.00E-01 |
| <b>AC009118.3</b> | -1.15 | 1.83E-01 | 1.00E+00 | -0.82 | 2.58E-01 | 8.00E-01 |
| <b>RRAS2</b>      | 0.40  | 1.84E-01 | 1.00E+00 | -0.61 | 2.58E-01 | 8.00E-01 |
| <b>P2RX6</b>      | 2.59  | 4.82E-02 | 1.00E+00 | -1.29 | 2.58E-01 | 8.00E-01 |
| <b>OGG1</b>       | -0.27 | 2.73E-01 | 1.00E+00 | -0.21 | 2.58E-01 | 8.00E-01 |
| <b>AL121820.1</b> | 1.10  | 1.22E-01 | 1.00E+00 | 1.25  | 2.58E-01 | 8.00E-01 |
| <b>RNFT1</b>      | 0.36  | 2.14E-01 | 1.00E+00 | -0.47 | 2.58E-01 | 8.00E-01 |
| <b>AC025048.2</b> | 0.39  | 6.21E-01 | 1.00E+00 | 0.99  | 2.58E-01 | 8.00E-01 |
| <b>CUEDC1</b>     | -0.07 | 8.51E-01 | 1.00E+00 | 0.90  | 2.58E-01 | 8.00E-01 |
| <b>CHCHD3</b>     | 0.06  | 7.78E-01 | 1.00E+00 | -0.23 | 2.58E-01 | 8.00E-01 |
| <b>BLOC1S3</b>    | -0.15 | 6.22E-01 | 1.00E+00 | 0.25  | 2.58E-01 | 8.00E-01 |
| <b>AC092802.1</b> | -0.66 | 2.98E-01 | 1.00E+00 | -0.70 | 2.58E-01 | 8.00E-01 |
| <b>EOMES</b>      | -2.42 | 8.13E-02 | 1.00E+00 | 1.52  | 2.58E-01 | 8.00E-01 |

|                    |       |          |          |       |          |          |
|--------------------|-------|----------|----------|-------|----------|----------|
| <b>XLOC_010453</b> | 0.57  | 7.71E-01 | 1.00E+00 | 2.45  | 2.58E-01 | 8.00E-01 |
| <b>WDR74</b>       | -0.20 | 4.08E-01 | 1.00E+00 | 0.29  | 2.58E-01 | 8.00E-01 |
| <b>LINC01336</b>   | -1.58 | 1.60E-01 | 1.00E+00 | 1.01  | 2.58E-01 | 8.00E-01 |
| <b>AP001056.1</b>  | -1.52 | 3.57E-01 | 1.00E+00 | 1.36  | 2.58E-01 | 8.00E-01 |
| <b>CRHR2</b>       | 0.58  | 1.99E-01 | 1.00E+00 | 0.85  | 2.58E-01 | 8.00E-01 |
| <b>LINC01835</b>   | 0.62  | 4.77E-01 | 1.00E+00 | 0.89  | 2.58E-01 | 8.00E-01 |
| <b>SNX11</b>       | 0.20  | 3.43E-01 | 1.00E+00 | 0.26  | 2.58E-01 | 8.00E-01 |
| <b>CD247</b>       | 0.03  | 9.72E-01 | 1.00E+00 | 1.01  | 2.58E-01 | 8.00E-01 |
| <b>GPR25</b>       | 0.89  | 7.96E-01 | 1.00E+00 | 2.39  | 2.58E-01 | 8.00E-01 |
| <b>ESS2</b>        | -0.14 | 5.63E-01 | 1.00E+00 | 0.30  | 2.58E-01 | 8.00E-01 |
| <b>KIF7</b>        | 0.18  | 6.10E-01 | 1.00E+00 | 1.04  | 2.58E-01 | 8.00E-01 |
| <b>DSG2</b>        | 0.18  | 7.46E-01 | 1.00E+00 | -0.38 | 2.58E-01 | 8.00E-01 |
| <b>IFT27</b>       | 0.07  | 7.28E-01 | 1.00E+00 | 0.29  | 2.58E-01 | 8.00E-01 |
| <b>AL450322.1</b>  | 0.65  | 3.81E-01 | 1.00E+00 | -0.91 | 2.59E-01 | 8.00E-01 |
| <b>AC104590.1</b>  | -1.52 | 6.24E-01 | 1.00E+00 | 1.89  | 2.59E-01 | 8.00E-01 |
| <b>REV3L</b>       | 0.25  | 3.54E-01 | 1.00E+00 | 0.31  | 2.59E-01 | 8.00E-01 |
| <b>ICOSLG</b>      | -0.37 | 3.19E-01 | 1.00E+00 | 0.77  | 2.59E-01 | 8.00E-01 |
| <b>ABHD1</b>       | -0.09 | 8.99E-01 | 1.00E+00 | -0.99 | 2.59E-01 | 8.00E-01 |
| <b>NUTM2G</b>      | -0.95 | 3.12E-01 | 1.00E+00 | 1.06  | 2.59E-01 | 8.00E-01 |
| <b>MTERF1</b>      | 0.11  | 7.17E-01 | 1.00E+00 | -0.49 | 2.59E-01 | 8.00E-01 |
| <b>TEAD2</b>       | 0.24  | 6.26E-01 | 1.00E+00 | 0.68  | 2.59E-01 | 8.00E-01 |
| <b>AC007557.3</b>  | -0.56 | 8.73E-01 | 1.00E+00 | -0.94 | 2.59E-01 | 8.00E-01 |
| <b>ADAMTS9</b>     | -0.12 | 7.80E-01 | 1.00E+00 | 0.83  | 2.59E-01 | 8.00E-01 |
| <b>AL354696.2</b>  | -0.76 | 3.92E-01 | 1.00E+00 | -0.52 | 2.59E-01 | 8.00E-01 |
| <b>AC068790.5</b>  | 1.12  | 7.47E-01 | 1.00E+00 | 1.42  | 2.59E-01 | 8.00E-01 |
| <b>AC116667.1</b>  | -0.40 | 7.03E-01 | 1.00E+00 | 1.33  | 2.59E-01 | 8.00E-01 |
| <b>AC084759.3</b>  | -0.17 | 8.02E-01 | 1.00E+00 | -1.32 | 2.59E-01 | 8.00E-01 |
| <b>BRWD1</b>       | 0.07  | 7.60E-01 | 1.00E+00 | -0.20 | 2.59E-01 | 8.00E-01 |
| <b>RPL7AP28</b>    | -0.30 | 7.64E-01 | 1.00E+00 | -0.87 | 2.59E-01 | 8.00E-01 |
| <b>ARPC4</b>       | 0.02  | 9.20E-01 | 1.00E+00 | 0.17  | 2.59E-01 | 8.00E-01 |
| <b>ABHD14B</b>     | 0.16  | 6.29E-01 | 1.00E+00 | -0.31 | 2.59E-01 | 8.00E-01 |
| <b>TP73</b>        | -0.70 | 1.07E-01 | 1.00E+00 | -0.79 | 2.59E-01 | 8.00E-01 |

|                   |       |          |          |       |          |          |
|-------------------|-------|----------|----------|-------|----------|----------|
| <b>TSEN2</b>      | 0.04  | 8.49E-01 | 1.00E+00 | -0.25 | 2.59E-01 | 8.00E-01 |
| <b>FUS</b>        | -0.20 | 3.21E-01 | 1.00E+00 | 0.30  | 2.59E-01 | 8.00E-01 |
| <b>AC093635.1</b> | -2.72 | 6.39E-02 | 1.00E+00 | -0.94 | 2.59E-01 | 8.00E-01 |
| <b>MEGF6</b>      | -0.15 | 6.47E-01 | 1.00E+00 | 0.76  | 2.59E-01 | 8.00E-01 |
| <b>LINC00243</b>  | -0.13 | 9.16E-01 | 1.00E+00 | -1.00 | 2.59E-01 | 8.00E-01 |
| <b>SNHG7</b>      | 0.53  | 1.91E-01 | 1.00E+00 | 0.68  | 2.59E-01 | 8.00E-01 |
| <b>MICAL2</b>     | -0.61 | 1.25E-01 | 1.00E+00 | 0.50  | 2.59E-01 | 8.00E-01 |
| <b>ITGA9-AS1</b>  | -0.03 | 9.34E-01 | 1.00E+00 | -0.41 | 2.60E-01 | 8.00E-01 |
| <b>KANK1</b>      | -0.01 | 9.83E-01 | 1.00E+00 | -0.28 | 2.60E-01 | 8.00E-01 |
| <b>GAA</b>        | -0.49 | 4.26E-02 | 1.00E+00 | 0.65  | 2.60E-01 | 8.00E-01 |
| <b>NFKBIL1</b>    | 0.07  | 7.75E-01 | 1.00E+00 | 0.48  | 2.60E-01 | 8.00E-01 |
| <b>HBM</b>        | 0.56  | 8.71E-01 | 1.00E+00 | 1.61  | 2.60E-01 | 8.00E-01 |
| <b>FAM120C</b>    | -0.34 | 1.56E-01 | 1.00E+00 | 0.38  | 2.60E-01 | 8.00E-01 |
| <b>AC108693.2</b> | -0.29 | 9.32E-01 | 1.00E+00 | 0.89  | 2.60E-01 | 8.00E-01 |
| <b>POMT2</b>      | 0.39  | 2.75E-01 | 1.00E+00 | 0.66  | 2.60E-01 | 8.00E-01 |
| <b>SEC11C</b>     | -0.02 | 9.27E-01 | 1.00E+00 | -0.35 | 2.60E-01 | 8.00E-01 |
| <b>TUBB8P7</b>    | 0.14  | 8.87E-01 | 1.00E+00 | 0.97  | 2.60E-01 | 8.00E-01 |
| <b>PAM</b>        | 0.82  | 5.94E-02 | 1.00E+00 | 0.45  | 2.60E-01 | 8.00E-01 |
| <b>AC003072.1</b> | 0.38  | 5.10E-01 | 1.00E+00 | 0.88  | 2.60E-01 | 8.00E-01 |
| <b>ZC3H14</b>     | -0.17 | 3.77E-01 | 1.00E+00 | -0.24 | 2.60E-01 | 8.00E-01 |
| <b>GPR39</b>      | -0.04 | 9.53E-01 | 1.00E+00 | 0.73  | 2.60E-01 | 8.00E-01 |
| <b>CSNK2B</b>     | -0.05 | 9.14E-01 | 1.00E+00 | -0.75 | 2.60E-01 | 8.00E-01 |
| <b>AP2B1</b>      | -0.02 | 9.37E-01 | 1.00E+00 | 0.41  | 2.60E-01 | 8.00E-01 |
| <b>PRPF4B</b>     | 0.08  | 7.55E-01 | 1.00E+00 | 0.24  | 2.60E-01 | 8.00E-01 |
| <b>FAM133A</b>    | -0.82 | 5.16E-01 | 1.00E+00 | -1.14 | 2.60E-01 | 8.00E-01 |
| <b>AL160272.1</b> | 3.19  | 5.14E-02 | 1.00E+00 | 1.66  | 2.60E-01 | 8.00E-01 |
| <b>AC017002.1</b> | 0.81  | 8.13E-01 | 1.00E+00 | 1.50  | 2.60E-01 | 8.00E-01 |
| <b>CDC37</b>      | -0.11 | 5.15E-01 | 1.00E+00 | 0.33  | 2.60E-01 | 8.00E-01 |
| <b>PAAF1</b>      | 0.32  | 4.69E-02 | 1.00E+00 | -0.32 | 2.60E-01 | 8.00E-01 |
| <b>ACBD6</b>      | -0.14 | 5.63E-01 | 1.00E+00 | 0.15  | 2.60E-01 | 8.00E-01 |
| <b>MAP7D1</b>     | -0.08 | 7.62E-01 | 1.00E+00 | 0.81  | 2.60E-01 | 8.00E-01 |
| <b>CCDC9</b>      | -0.11 | 7.03E-01 | 1.00E+00 | 0.74  | 2.61E-01 | 8.00E-01 |

|             |       |          |          |       |          |          |
|-------------|-------|----------|----------|-------|----------|----------|
| PACSIN2     | 0.26  | 1.67E-01 | 1.00E+00 | 0.22  | 2.61E-01 | 8.00E-01 |
| XLOC_003741 | -2.60 | 1.42E-01 | 1.00E+00 | -1.48 | 2.61E-01 | 8.00E-01 |
| Z82217.1    | 0.01  | 9.96E-01 | 1.00E+00 | 1.11  | 2.61E-01 | 8.00E-01 |
| ARG2        | 0.03  | 9.30E-01 | 1.00E+00 | 0.56  | 2.61E-01 | 8.00E-01 |
| SOD1        | 0.19  | 3.09E-01 | 1.00E+00 | -0.23 | 2.61E-01 | 8.00E-01 |
| CCNO        | -1.16 | 2.75E-03 | 2.72E-01 | -0.62 | 2.61E-01 | 8.00E-01 |
| SF3B6       | -0.04 | 8.56E-01 | 1.00E+00 | -0.37 | 2.61E-01 | 8.00E-01 |
| CRBN        | 0.34  | 7.79E-02 | 1.00E+00 | -0.42 | 2.61E-01 | 8.00E-01 |
| BTBD18      | 0.74  | 7.00E-01 | 1.00E+00 | -1.55 | 2.61E-01 | 8.00E-01 |
| AL078581.1  | -0.43 | 7.23E-01 | 1.00E+00 | 0.91  | 2.61E-01 | 8.00E-01 |
| THAP2       | 0.06  | 8.91E-01 | 1.00E+00 | 0.37  | 2.61E-01 | 8.00E-01 |
| FLNB-AS1    | -2.95 | 1.32E-01 | 1.00E+00 | 1.47  | 2.61E-01 | 8.00E-01 |
| ZNF215      | 1.23  | 9.22E-02 | 1.00E+00 | 0.89  | 2.61E-01 | 8.00E-01 |
| ATP5MPL     | 0.23  | 2.35E-01 | 1.00E+00 | -0.49 | 2.61E-01 | 8.00E-01 |
| ZNF518A     | -0.08 | 7.97E-01 | 1.00E+00 | -0.25 | 2.61E-01 | 8.00E-01 |
| DPH3        | 0.10  | 6.94E-01 | 1.00E+00 | -0.32 | 2.61E-01 | 8.00E-01 |
| GPRC5C      | -0.29 | 3.84E-01 | 1.00E+00 | -0.44 | 2.61E-01 | 8.00E-01 |
| PRDM8       | 0.87  | 8.85E-02 | 1.00E+00 | 0.90  | 2.61E-01 | 8.00E-01 |
| XLOC_002995 | -1.64 | 4.04E-01 | 1.00E+00 | -1.33 | 2.61E-01 | 8.00E-01 |
| AC114956.2  | -2.40 | 5.15E-03 | 4.18E-01 | -1.01 | 2.61E-01 | 8.00E-01 |
| ITIH1       | -2.65 | 1.10E-01 | 1.00E+00 | 1.36  | 2.61E-01 | 8.00E-01 |
| ZNF358      | 0.20  | 5.91E-01 | 1.00E+00 | 0.49  | 2.61E-01 | 8.00E-01 |
| SOGA1       | -0.36 | 1.43E-01 | 1.00E+00 | 0.67  | 2.61E-01 | 8.00E-01 |
| NMBR        | 0.01  | 9.95E-01 | 1.00E+00 | 1.48  | 2.61E-01 | 8.00E-01 |
| XLOC_013994 | 0.13  | 6.72E-01 | 1.00E+00 | -0.60 | 2.61E-01 | 8.00E-01 |
| ZBTB11      | -0.05 | 8.61E-01 | 1.00E+00 | -0.26 | 2.61E-01 | 8.00E-01 |
| CTDSP2      | 0.20  | 2.81E-01 | 1.00E+00 | 0.43  | 2.61E-01 | 8.00E-01 |
| NDUFV3      | -0.19 | 5.06E-01 | 1.00E+00 | -0.16 | 2.61E-01 | 8.00E-01 |
| HIGD2A      | -0.03 | 8.99E-01 | 1.00E+00 | -0.47 | 2.61E-01 | 8.00E-01 |
| CLPTM1      | -0.18 | 3.93E-01 | 1.00E+00 | 0.40  | 2.61E-01 | 8.00E-01 |
| CABP4       | -0.06 | 9.43E-01 | 1.00E+00 | 0.81  | 2.61E-01 | 8.00E-01 |
| KCTD7       | 0.41  | 4.98E-01 | 1.00E+00 | 0.53  | 2.61E-01 | 8.00E-01 |

|                      |       |          |          |       |          |          |
|----------------------|-------|----------|----------|-------|----------|----------|
| <b>RP11-391M20.1</b> | 0.25  | 4.56E-01 | 1.00E+00 | -0.36 | 2.62E-01 | 8.00E-01 |
| <b>TSPAN7</b>        | 0.05  | 9.15E-01 | 1.00E+00 | -0.58 | 2.62E-01 | 8.00E-01 |
| <b>Z99129.4</b>      | 0.30  | 4.03E-01 | 1.00E+00 | -0.43 | 2.62E-01 | 8.00E-01 |
| <b>H3F3A</b>         | 0.00  | 9.86E-01 | 1.00E+00 | -0.27 | 2.62E-01 | 8.00E-01 |
| <b>MBOAT4</b>        | -0.19 | 9.30E-01 | 1.00E+00 | 0.77  | 2.62E-01 | 8.00E-01 |
| <b>NT5C2</b>         | -0.18 | 3.50E-01 | 1.00E+00 | 0.39  | 2.62E-01 | 8.00E-01 |
| <b>IGHG1</b>         | 4.23  | 8.61E-11 | 5.11E-08 | 3.51  | 2.62E-01 | 8.00E-01 |
| <b>AL353764.1</b>    | 0.32  | 8.74E-01 | 1.00E+00 | 1.34  | 2.62E-01 | 8.00E-01 |
| <b>RAB36</b>         | -0.01 | 9.73E-01 | 1.00E+00 | 0.58  | 2.62E-01 | 8.00E-01 |
| <b>HOXA9</b>         | -0.56 | 1.45E-01 | 1.00E+00 | -0.59 | 2.62E-01 | 8.00E-01 |
| <b>DENND5B-AS1</b>   | -2.74 | 2.58E-01 | 1.00E+00 | -0.64 | 2.62E-01 | 8.00E-01 |
| <b>PSMC1</b>         | -0.06 | 7.83E-01 | 1.00E+00 | 0.18  | 2.62E-01 | 8.00E-01 |
| <b>PTPRU</b>         | 0.16  | 6.28E-01 | 1.00E+00 | 0.56  | 2.62E-01 | 8.00E-01 |
| <b>SLC25A42</b>      | 0.10  | 7.71E-01 | 1.00E+00 | -0.52 | 2.62E-01 | 8.00E-01 |
| <b>UBE2Q2P2</b>      | 0.97  | 2.85E-01 | 1.00E+00 | -0.81 | 2.62E-01 | 8.00E-01 |
| <b>AC092053.3</b>    | -0.94 | 1.24E-01 | 1.00E+00 | -0.63 | 2.62E-01 | 8.00E-01 |
| <b>DCDC2</b>         | 0.99  | 2.79E-01 | 1.00E+00 | 1.17  | 2.62E-01 | 8.00E-01 |
| <b>TIMM21</b>        | 0.39  | 1.86E-01 | 1.00E+00 | -0.38 | 2.62E-01 | 8.00E-01 |
| <b>KIF26A</b>        | -0.05 | 8.92E-01 | 1.00E+00 | 0.86  | 2.62E-01 | 8.00E-01 |
| <b>IGKV1-12</b>      | 1.38  | 6.83E-01 | 1.00E+00 | 3.54  | 2.62E-01 | 8.00E-01 |
| <b>CASQ2</b>         | -0.55 | 3.64E-01 | 1.00E+00 | -0.72 | 2.62E-01 | 8.00E-01 |
| <b>PRR14</b>         | -0.26 | 3.01E-01 | 1.00E+00 | 0.37  | 2.62E-01 | 8.00E-01 |
| <b>USP16</b>         | 0.00  | 9.81E-01 | 1.00E+00 | -0.15 | 2.62E-01 | 8.00E-01 |
| <b>LINC02014</b>     | -1.91 | 4.40E-01 | 1.00E+00 | -1.43 | 2.62E-01 | 8.00E-01 |
| <b>OLA1P1</b>        | -1.04 | 5.58E-01 | 1.00E+00 | -0.55 | 2.62E-01 | 8.00E-01 |
| <b>CALR</b>          | -0.27 | 2.08E-01 | 1.00E+00 | 0.66  | 2.62E-01 | 8.00E-01 |
| <b>GSEC</b>          | -0.41 | 4.76E-01 | 1.00E+00 | 0.67  | 2.62E-01 | 8.00E-01 |
| <b>FBXO21</b>        | 0.02  | 9.12E-01 | 1.00E+00 | -0.29 | 2.62E-01 | 8.00E-01 |
| <b>ZSCAN20</b>       | 0.45  | 3.00E-01 | 1.00E+00 | 0.64  | 2.62E-01 | 8.00E-01 |
| <b>ACBD5</b>         | 0.06  | 8.45E-01 | 1.00E+00 | -0.19 | 2.62E-01 | 8.00E-01 |
| <b>G3769</b>         | -2.83 | 1.49E-01 | 1.00E+00 | -1.42 | 2.62E-01 | 8.00E-01 |
| <b>AL049840.1</b>    | 0.76  | 3.80E-01 | 1.00E+00 | 0.78  | 2.62E-01 | 8.00E-01 |



|                   |       |          |          |       |          |          |
|-------------------|-------|----------|----------|-------|----------|----------|
| <b>CMSS1</b>      | -0.33 | 6.03E-02 | 1.00E+00 | -0.28 | 2.62E-01 | 8.00E-01 |
| <b>VPS18</b>      | -0.06 | 8.05E-01 | 1.00E+00 | 0.54  | 2.62E-01 | 8.00E-01 |
| <b>AVPI1</b>      | -0.59 | 1.32E-01 | 1.00E+00 | 0.30  | 2.62E-01 | 8.00E-01 |
| <b>AC128688.1</b> | -0.79 | 4.94E-01 | 1.00E+00 | -0.96 | 2.62E-01 | 8.00E-01 |
| <b>DRG1</b>       | 0.08  | 6.35E-01 | 1.00E+00 | -0.26 | 2.62E-01 | 8.00E-01 |
| <b>HOXC-AS3</b>   | -0.81 | 4.49E-01 | 1.00E+00 | -0.53 | 2.63E-01 | 8.00E-01 |
| <b>BCL2L10</b>    | 0.14  | 7.56E-01 | 1.00E+00 | -0.60 | 2.63E-01 | 8.00E-01 |
| <b>AGFG1</b>      | 0.19  | 3.82E-01 | 1.00E+00 | -0.51 | 2.63E-01 | 8.01E-01 |
| <b>OTOA</b>       | 1.27  | 3.42E-01 | 1.00E+00 | 1.13  | 2.63E-01 | 8.01E-01 |
| <b>ATP6AP2</b>    | 0.08  | 6.85E-01 | 1.00E+00 | -0.30 | 2.63E-01 | 8.01E-01 |
| <b>MCM5</b>       | -0.68 | 3.54E-03 | 3.20E-01 | 0.25  | 2.63E-01 | 8.01E-01 |
| <b>ZNF207</b>     | -0.24 | 2.17E-01 | 1.00E+00 | 0.18  | 2.63E-01 | 8.01E-01 |
| <b>AL162742.1</b> | -1.93 | 3.85E-02 | 1.00E+00 | -1.12 | 2.63E-01 | 8.01E-01 |
| <b>AC010325.1</b> | 0.24  | 8.31E-01 | 1.00E+00 | -0.88 | 2.63E-01 | 8.01E-01 |
| <b>NMB</b>        | 1.72  | 4.26E-02 | 1.00E+00 | -0.60 | 2.63E-01 | 8.01E-01 |
| <b>ECD</b>        | 0.05  | 7.70E-01 | 1.00E+00 | -0.24 | 2.63E-01 | 8.01E-01 |
| <b>CLEC3B</b>     | 0.90  | 4.67E-02 | 1.00E+00 | -0.74 | 2.63E-01 | 8.01E-01 |
| <b>AC087521.2</b> | 1.11  | 6.41E-01 | 1.00E+00 | 1.22  | 2.63E-01 | 8.01E-01 |
| <b>RASA4CP</b>    | 0.26  | 4.06E-01 | 1.00E+00 | 0.39  | 2.63E-01 | 8.01E-01 |
| <b>MYBPC3</b>     | 0.75  | 6.70E-01 | 1.00E+00 | 2.07  | 2.63E-01 | 8.01E-01 |
| <b>LINC01671</b>  | 0.62  | 4.58E-01 | 1.00E+00 | 1.11  | 2.63E-01 | 8.01E-01 |
| <b>DUXAP9</b>     | -1.19 | 6.12E-01 | 1.00E+00 | 0.99  | 2.63E-01 | 8.01E-01 |
| <b>LINC01013</b>  | -0.82 | 4.02E-01 | 1.00E+00 | 0.94  | 2.63E-01 | 8.01E-01 |
| <b>GREB1</b>      | -0.01 | 9.91E-01 | 1.00E+00 | 0.62  | 2.63E-01 | 8.01E-01 |
| <b>AC092720.1</b> | 0.26  | 7.66E-01 | 1.00E+00 | 1.29  | 2.63E-01 | 8.01E-01 |
| <b>LETMD1</b>     | 0.12  | 6.99E-01 | 1.00E+00 | -0.29 | 2.63E-01 | 8.01E-01 |
| <b>STXBP5</b>     | 0.01  | 9.80E-01 | 1.00E+00 | -0.41 | 2.63E-01 | 8.01E-01 |
| <b>ATXN2</b>      | -0.02 | 9.39E-01 | 1.00E+00 | -0.24 | 2.63E-01 | 8.01E-01 |
| <b>SPATA20P1</b>  | NA    | NA       | NA       | 1.98  | 2.63E-01 | 8.01E-01 |
| <b>PACSIN3</b>    | -0.20 | 4.67E-01 | 1.00E+00 | -0.41 | 2.63E-01 | 8.01E-01 |
| <b>SUMO2</b>      | 0.12  | 4.43E-01 | 1.00E+00 | -0.27 | 2.63E-01 | 8.01E-01 |
| <b>GTF2H1</b>     | 0.02  | 9.36E-01 | 1.00E+00 | -0.23 | 2.63E-01 | 8.01E-01 |

|             |       |          |          |       |          |          |
|-------------|-------|----------|----------|-------|----------|----------|
| SLC35A5     | 0.20  | 5.97E-01 | 1.00E+00 | -0.33 | 2.64E-01 | 8.01E-01 |
| TRAPPC4     | 0.08  | 7.15E-01 | 1.00E+00 | -0.38 | 2.64E-01 | 8.01E-01 |
| C6orf203    | 0.27  | 3.49E-01 | 1.00E+00 | -0.35 | 2.64E-01 | 8.01E-01 |
| SH3TC2      | -0.26 | 6.22E-01 | 1.00E+00 | 0.70  | 2.64E-01 | 8.01E-01 |
| KCNMA1      | -0.36 | 5.20E-01 | 1.00E+00 | 0.71  | 2.64E-01 | 8.01E-01 |
| AL137793.1  | -0.29 | 8.35E-01 | 1.00E+00 | -1.32 | 2.64E-01 | 8.01E-01 |
| INPP5K      | -0.09 | 5.60E-01 | 1.00E+00 | -0.17 | 2.64E-01 | 8.01E-01 |
| COL7A1      | -0.80 | 4.38E-02 | 1.00E+00 | 0.88  | 2.64E-01 | 8.01E-01 |
| HOXD9       | 0.21  | 5.29E-01 | 1.00E+00 | 0.54  | 2.64E-01 | 8.01E-01 |
| NPTX2       | 0.08  | 8.77E-01 | 1.00E+00 | 1.06  | 2.64E-01 | 8.01E-01 |
| AC091074.1  | -1.50 | 4.27E-01 | 1.00E+00 | -2.06 | 2.64E-01 | 8.01E-01 |
| ALKBH8      | 0.26  | 2.15E-01 | 1.00E+00 | 0.26  | 2.64E-01 | 8.01E-01 |
| CBLN3       | 0.22  | 5.54E-01 | 1.00E+00 | 0.89  | 2.64E-01 | 8.01E-01 |
| STIM1       | 0.14  | 3.64E-01 | 1.00E+00 | 0.38  | 2.64E-01 | 8.01E-01 |
| AC009302.1  | -1.86 | 2.69E-01 | 1.00E+00 | -0.73 | 2.64E-01 | 8.01E-01 |
| VAMP5       | -0.08 | 8.05E-01 | 1.00E+00 | 0.44  | 2.64E-01 | 8.01E-01 |
| G36217      | -1.55 | 4.25E-01 | 1.00E+00 | -1.55 | 2.64E-01 | 8.01E-01 |
| C1orf216    | -0.12 | 7.04E-01 | 1.00E+00 | 0.45  | 2.64E-01 | 8.01E-01 |
| ATP1B2      | -0.33 | 5.87E-01 | 1.00E+00 | 0.51  | 2.64E-01 | 8.01E-01 |
| XLOC_001716 | 1.35  | 4.87E-01 | 1.00E+00 | -1.82 | 2.64E-01 | 8.01E-01 |
| CAMK2N2     | -2.40 | 2.22E-02 | 8.97E-01 | 2.11  | 2.64E-01 | 8.01E-01 |
| LINC00636   | 0.21  | 9.02E-01 | 1.00E+00 | 1.26  | 2.64E-01 | 8.01E-01 |
| RPL7A       | -0.22 | 4.93E-01 | 1.00E+00 | 0.46  | 2.64E-01 | 8.01E-01 |
| APOBEC3A    | -1.09 | 3.46E-01 | 1.00E+00 | 3.49  | 2.64E-01 | 8.01E-01 |
| ENPP5       | 0.19  | 6.97E-01 | 1.00E+00 | -0.77 | 2.64E-01 | 8.01E-01 |
| RALGAPA1    | -0.23 | 3.73E-01 | 1.00E+00 | -0.37 | 2.64E-01 | 8.01E-01 |
| XLOC_009447 | -0.96 | 6.89E-02 | 1.00E+00 | -0.74 | 2.64E-01 | 8.01E-01 |
| ZNRF1       | -0.31 | 3.27E-01 | 1.00E+00 | -0.51 | 2.64E-01 | 8.01E-01 |
| PAICSP1     | -2.09 | 3.08E-01 | 1.00E+00 | 0.93  | 2.64E-01 | 8.01E-01 |
| PRKAA2      | 0.24  | 7.11E-01 | 1.00E+00 | -0.58 | 2.64E-01 | 8.01E-01 |
| NDUFB6      | -0.10 | 5.18E-01 | 1.00E+00 | -0.47 | 2.64E-01 | 8.01E-01 |
| AC083899.1  | 0.41  | 5.42E-01 | 1.00E+00 | 0.36  | 2.65E-01 | 8.01E-01 |

|                     |       |          |          |       |          |          |
|---------------------|-------|----------|----------|-------|----------|----------|
| <b>HLA-DQB1-AS1</b> | 1.30  | 4.77E-01 | 1.00E+00 | 1.18  | 2.65E-01 | 8.01E-01 |
| <b>RPL18A</b>       | -0.30 | 2.79E-01 | 1.00E+00 | 0.39  | 2.65E-01 | 8.01E-01 |
| <b>AL691447.2</b>   | 0.64  | 5.15E-01 | 1.00E+00 | 1.36  | 2.65E-01 | 8.01E-01 |
| <b>AGTPBP1</b>      | -0.20 | 3.83E-01 | 1.00E+00 | -0.49 | 2.65E-01 | 8.01E-01 |
| <b>DGKD</b>         | 0.39  | 4.16E-01 | 1.00E+00 | 0.71  | 2.65E-01 | 8.01E-01 |
| <b>MYEF2</b>        | 0.67  | 3.44E-01 | 1.00E+00 | 0.39  | 2.65E-01 | 8.01E-01 |
| <b>POLR3K</b>       | -0.06 | 8.62E-01 | 1.00E+00 | -0.39 | 2.65E-01 | 8.01E-01 |
| <b>TMEM8B</b>       | 0.15  | 7.19E-01 | 1.00E+00 | -0.52 | 2.65E-01 | 8.01E-01 |
| <b>NUDT7</b>        | 0.12  | 8.38E-01 | 1.00E+00 | -0.58 | 2.65E-01 | 8.01E-01 |
| <b>PPP2R3A</b>      | -0.32 | 3.70E-01 | 1.00E+00 | -0.35 | 2.65E-01 | 8.01E-01 |
| <b>XLOC_001374</b>  | -3.31 | 7.36E-02 | 1.00E+00 | -0.86 | 2.65E-01 | 8.01E-01 |
| <b>ATP13A3</b>      | 0.78  | 5.57E-02 | 1.00E+00 | 0.43  | 2.65E-01 | 8.01E-01 |
| <b>NEK5</b>         | 0.86  | 2.97E-01 | 1.00E+00 | 0.64  | 2.65E-01 | 8.02E-01 |
| <b>ANXA2R</b>       | 0.11  | 8.21E-01 | 1.00E+00 | 0.62  | 2.65E-01 | 8.02E-01 |
| <b>URM1</b>         | -0.26 | 1.41E-01 | 1.00E+00 | 0.21  | 2.65E-01 | 8.02E-01 |
| <b>GABPA</b>        | 0.05  | 8.55E-01 | 1.00E+00 | -0.27 | 2.66E-01 | 8.02E-01 |
| <b>UPK3A</b>        | -0.76 | 7.73E-01 | 1.00E+00 | 1.35  | 2.66E-01 | 8.02E-01 |
| <b>ARID5A</b>       | -0.25 | 4.28E-01 | 1.00E+00 | 0.66  | 2.66E-01 | 8.02E-01 |
| <b>AC131206.1</b>   | 0.05  | 9.37E-01 | 1.00E+00 | 0.51  | 2.66E-01 | 8.02E-01 |
| <b>PKP4</b>         | 0.00  | 9.95E-01 | 1.00E+00 | 0.37  | 2.66E-01 | 8.02E-01 |
| <b>PARL</b>         | 0.24  | 6.30E-01 | 1.00E+00 | -0.45 | 2.66E-01 | 8.02E-01 |
| <b>LINC01762</b>    | -2.64 | 2.71E-02 | 9.60E-01 | -1.08 | 2.66E-01 | 8.02E-01 |
| <b>AC104162.2</b>   | -1.67 | 1.42E-01 | 1.00E+00 | -0.65 | 2.66E-01 | 8.02E-01 |
| <b>MIR133A1HG</b>   | -2.86 | 1.33E-01 | 1.00E+00 | -1.22 | 2.66E-01 | 8.03E-01 |
| <b>COX19</b>        | 0.13  | 5.43E-01 | 1.00E+00 | 0.25  | 2.66E-01 | 8.03E-01 |
| <b>CCR5</b>         | 0.16  | 8.16E-01 | 1.00E+00 | 3.48  | 2.66E-01 | 8.03E-01 |
| <b>MYRIP</b>        | -0.14 | 7.86E-01 | 1.00E+00 | -0.87 | 2.66E-01 | 8.03E-01 |
| <b>AL133520.1</b>   | 1.02  | 5.64E-02 | 1.00E+00 | 0.93  | 2.66E-01 | 8.03E-01 |
| <b>AL445487.1</b>   | -1.36 | 6.93E-01 | 1.00E+00 | 1.69  | 2.66E-01 | 8.03E-01 |
| <b>SLC12A9</b>      | -0.45 | 6.13E-02 | 1.00E+00 | 0.81  | 2.66E-01 | 8.03E-01 |
| <b>UTP14A</b>       | -0.10 | 5.98E-01 | 1.00E+00 | 0.34  | 2.66E-01 | 8.03E-01 |
| <b>NPM1P37</b>      | 1.27  | 7.13E-01 | 1.00E+00 | -1.40 | 2.66E-01 | 8.03E-01 |

|            |       |          |          |       |          |          |
|------------|-------|----------|----------|-------|----------|----------|
| SLC4A7     | 0.34  | 3.73E-01 | 1.00E+00 | 0.47  | 2.66E-01 | 8.03E-01 |
| TNFSF18    | -1.40 | 2.85E-01 | 1.00E+00 | 1.42  | 2.66E-01 | 8.03E-01 |
| G6485      | 0.11  | 8.60E-01 | 1.00E+00 | 1.17  | 2.66E-01 | 8.03E-01 |
| ATP1B3-AS1 | -2.77 | 4.14E-01 | 1.00E+00 | 1.99  | 2.66E-01 | 8.03E-01 |
| PRR15L     | 0.16  | 8.05E-01 | 1.00E+00 | -0.78 | 2.66E-01 | 8.03E-01 |
| HERC2P9    | 0.19  | 7.79E-01 | 1.00E+00 | 0.62  | 2.66E-01 | 8.03E-01 |
| CREG1      | -0.04 | 9.06E-01 | 1.00E+00 | -0.40 | 2.66E-01 | 8.03E-01 |
| FST        | 0.99  | 4.03E-02 | 1.00E+00 | 0.57  | 2.67E-01 | 8.03E-01 |
| LARS       | -0.28 | 8.99E-02 | 1.00E+00 | -0.15 | 2.67E-01 | 8.03E-01 |
| LINC02182  | -2.46 | 2.56E-01 | 1.00E+00 | 0.99  | 2.67E-01 | 8.03E-01 |
| FXR1       | -0.04 | 7.96E-01 | 1.00E+00 | 0.21  | 2.67E-01 | 8.03E-01 |
| FGFR1OP2   | 0.02  | 9.32E-01 | 1.00E+00 | -0.23 | 2.67E-01 | 8.03E-01 |
| PGP        | -0.60 | 3.95E-02 | 1.00E+00 | -0.78 | 2.67E-01 | 8.03E-01 |
| MEGF10     | 0.25  | 7.83E-01 | 1.00E+00 | -1.09 | 2.67E-01 | 8.03E-01 |
| RPS4XP14   | 0.56  | 8.71E-01 | 1.00E+00 | -1.07 | 2.67E-01 | 8.03E-01 |
| AC090409.1 | 1.12  | 1.49E-01 | 1.00E+00 | -0.71 | 2.67E-01 | 8.03E-01 |
| PUS7       | -0.53 | 4.67E-02 | 1.00E+00 | -0.25 | 2.67E-01 | 8.03E-01 |
| TMEM45B    | 0.05  | 8.92E-01 | 1.00E+00 | 0.55  | 2.67E-01 | 8.03E-01 |
| POLR3A     | 0.07  | 7.70E-01 | 1.00E+00 | 0.33  | 2.67E-01 | 8.03E-01 |
| AC073072.2 | 0.88  | 7.98E-01 | 1.00E+00 | -0.81 | 2.67E-01 | 8.03E-01 |
| COG6       | 0.08  | 7.35E-01 | 1.00E+00 | -0.25 | 2.67E-01 | 8.03E-01 |
| TEX261     | 0.20  | 4.11E-01 | 1.00E+00 | -0.44 | 2.67E-01 | 8.03E-01 |
| TRMT2B     | 0.20  | 2.78E-01 | 1.00E+00 | -0.24 | 2.67E-01 | 8.03E-01 |
| HMGB1P5    | 0.38  | 8.33E-02 | 1.00E+00 | -0.27 | 2.67E-01 | 8.03E-01 |
| DNMT1      | -0.38 | 7.88E-02 | 1.00E+00 | 0.39  | 2.67E-01 | 8.03E-01 |
| MKLN1      | 0.24  | 3.59E-01 | 1.00E+00 | -0.23 | 2.67E-01 | 8.03E-01 |
| SNX18P3    | -0.07 | 9.26E-01 | 1.00E+00 | -1.39 | 2.67E-01 | 8.03E-01 |
| PIH1D1     | 0.12  | 4.67E-01 | 1.00E+00 | 0.19  | 2.67E-01 | 8.03E-01 |
| DOCK3      | -0.68 | 2.62E-01 | 1.00E+00 | -0.79 | 2.67E-01 | 8.03E-01 |
| STPG1      | 0.01  | 9.71E-01 | 1.00E+00 | -0.23 | 2.67E-01 | 8.03E-01 |
| THYN1      | 0.14  | 5.83E-01 | 1.00E+00 | -0.38 | 2.67E-01 | 8.03E-01 |
| CUL3       | 0.23  | 4.00E-01 | 1.00E+00 | -0.48 | 2.67E-01 | 8.03E-01 |

|                   |       |          |          |       |          |          |
|-------------------|-------|----------|----------|-------|----------|----------|
| <b>MRS2</b>       | 0.23  | 3.69E-01 | 1.00E+00 | -0.28 | 2.68E-01 | 8.03E-01 |
| <b>AP001057.1</b> | -0.26 | 9.17E-01 | 1.00E+00 | 1.48  | 2.68E-01 | 8.03E-01 |
| <b>ST6GALNAC4</b> | -0.28 | 4.10E-01 | 1.00E+00 | 0.44  | 2.68E-01 | 8.03E-01 |
| <b>BET1L</b>      | -0.16 | 5.12E-01 | 1.00E+00 | 0.25  | 2.68E-01 | 8.03E-01 |
| <b>AP001330.1</b> | -0.30 | 7.54E-01 | 1.00E+00 | -0.93 | 2.68E-01 | 8.03E-01 |
| <b>RNF216</b>     | -0.22 | 2.49E-01 | 1.00E+00 | 0.30  | 2.68E-01 | 8.03E-01 |
| <b>CDHR3</b>      | 0.33  | 5.02E-01 | 1.00E+00 | -0.74 | 2.68E-01 | 8.03E-01 |
| <b>NFIA-AS2</b>   | -2.38 | 1.20E-01 | 1.00E+00 | 1.01  | 2.68E-01 | 8.03E-01 |
| <b>SEZ6L</b>      | -2.11 | 5.11E-01 | 1.00E+00 | -0.98 | 2.68E-01 | 8.03E-01 |
| <b>GPX8</b>       | 0.22  | 5.76E-01 | 1.00E+00 | 0.41  | 2.68E-01 | 8.03E-01 |
| <b>G41319</b>     | -0.06 | 9.49E-01 | 1.00E+00 | 0.77  | 2.68E-01 | 8.03E-01 |
| <b>DNAJA3</b>     | 0.04  | 8.30E-01 | 1.00E+00 | -0.25 | 2.68E-01 | 8.03E-01 |
| <b>MRPL22</b>     | 0.07  | 6.68E-01 | 1.00E+00 | -0.39 | 2.68E-01 | 8.03E-01 |
| <b>AC103760.1</b> | 1.12  | 1.41E-01 | 1.00E+00 | -0.82 | 2.68E-01 | 8.03E-01 |
| <b>RPL10P11</b>   | -0.81 | 5.82E-01 | 1.00E+00 | -1.57 | 2.68E-01 | 8.03E-01 |
| <b>AC009570.1</b> | -2.99 | 8.19E-02 | 1.00E+00 | -1.26 | 2.68E-01 | 8.03E-01 |
| <b>SPIN3</b>      | 0.17  | 7.00E-01 | 1.00E+00 | 0.62  | 2.68E-01 | 8.03E-01 |
| <b>AF131215.7</b> | 0.04  | 9.57E-01 | 1.00E+00 | -1.04 | 2.68E-01 | 8.03E-01 |
| <b>PTPRD-AS1</b>  | -2.69 | 7.72E-02 | 1.00E+00 | -1.39 | 2.68E-01 | 8.03E-01 |
| <b>PROKR1</b>     | 4.97  | 4.86E-02 | 1.00E+00 | 1.79  | 2.68E-01 | 8.03E-01 |
| <b>SLC3A1</b>     | 1.05  | 7.57E-01 | 1.00E+00 | -1.08 | 2.68E-01 | 8.03E-01 |
| <b>PHF19</b>      | 0.26  | 2.75E-01 | 1.00E+00 | 0.48  | 2.68E-01 | 8.03E-01 |
| <b>SUCLG2</b>     | -0.03 | 8.66E-01 | 1.00E+00 | -0.21 | 2.68E-01 | 8.03E-01 |
| <b>TH</b>         | 0.41  | 7.63E-01 | 1.00E+00 | 1.72  | 2.68E-01 | 8.03E-01 |
| <b>AC023983.1</b> | 3.27  | 3.32E-01 | 1.00E+00 | -0.82 | 2.68E-01 | 8.03E-01 |
| <b>SSPO</b>       | -0.15 | 8.80E-01 | 1.00E+00 | 1.27  | 2.68E-01 | 8.03E-01 |
| <b>CCND2-AS1</b>  | 1.23  | 3.30E-01 | 1.00E+00 | 0.85  | 2.68E-01 | 8.04E-01 |
| <b>KIAA1841</b>   | -0.19 | 5.72E-01 | 1.00E+00 | -0.43 | 2.69E-01 | 8.04E-01 |
| <b>OXA1L</b>      | -0.19 | 3.77E-01 | 1.00E+00 | 0.23  | 2.69E-01 | 8.04E-01 |
| <b>ARHGAP35</b>   | -0.20 | 3.78E-01 | 1.00E+00 | 0.52  | 2.69E-01 | 8.04E-01 |
| <b>OSGEPL1</b>    | 0.10  | 7.40E-01 | 1.00E+00 | -0.44 | 2.69E-01 | 8.04E-01 |
| <b>MARK4</b>      | -0.67 | 2.49E-02 | 9.28E-01 | 0.74  | 2.69E-01 | 8.04E-01 |

|                   |       |          |          |       |          |          |
|-------------------|-------|----------|----------|-------|----------|----------|
| <b>LINC00518</b>  | -0.30 | 8.13E-01 | 1.00E+00 | 1.13  | 2.69E-01 | 8.04E-01 |
| <b>ST13P4</b>     | -0.33 | 7.00E-01 | 1.00E+00 | -0.46 | 2.69E-01 | 8.04E-01 |
| <b>SGCG</b>       | 0.95  | 1.69E-03 | 2.28E-01 | -0.83 | 2.69E-01 | 8.04E-01 |
| <b>AP001324.1</b> | 0.18  | 6.64E-01 | 1.00E+00 | -0.66 | 2.69E-01 | 8.04E-01 |
| <b>LCN2</b>       | -1.00 | 1.76E-01 | 1.00E+00 | 0.92  | 2.69E-01 | 8.04E-01 |
| <b>NELFE</b>      | -0.14 | 4.52E-01 | 1.00E+00 | -0.11 | 2.69E-01 | 8.04E-01 |
| <b>ADK</b>        | 0.15  | 5.98E-01 | 1.00E+00 | -0.42 | 2.69E-01 | 8.04E-01 |
| <b>AL136982.5</b> | 0.44  | 5.54E-01 | 1.00E+00 | 0.90  | 2.69E-01 | 8.04E-01 |
| <b>AIM2</b>       | -2.46 | 2.38E-02 | 9.16E-01 | 3.47  | 2.69E-01 | 8.04E-01 |
| <b>SMIM6</b>      | -2.80 | 1.43E-01 | 1.00E+00 | -1.76 | 2.69E-01 | 8.04E-01 |
| <b>TFR2</b>       | -0.02 | 9.52E-01 | 1.00E+00 | 0.81  | 2.69E-01 | 8.04E-01 |
| <b>GPR27</b>      | -0.13 | 6.80E-01 | 1.00E+00 | -0.60 | 2.69E-01 | 8.04E-01 |
| <b>LYAR</b>       | 0.22  | 2.84E-01 | 1.00E+00 | 0.26  | 2.69E-01 | 8.04E-01 |
| <b>PI4K2A</b>     | 0.13  | 5.10E-01 | 1.00E+00 | 0.54  | 2.69E-01 | 8.04E-01 |
| <b>IQCE</b>       | -0.15 | 4.37E-01 | 1.00E+00 | 0.52  | 2.69E-01 | 8.04E-01 |
| <b>AL138781.2</b> | 0.89  | 1.54E-01 | 1.00E+00 | -1.19 | 2.69E-01 | 8.04E-01 |
| <b>SEPHS1</b>     | -0.07 | 6.58E-01 | 1.00E+00 | -0.20 | 2.69E-01 | 8.04E-01 |
| <b>CDK5RAP2</b>   | 0.00  | 9.88E-01 | 1.00E+00 | 0.29  | 2.69E-01 | 8.04E-01 |
| <b>SNAPIN</b>     | 0.01  | 9.67E-01 | 1.00E+00 | -0.34 | 2.69E-01 | 8.04E-01 |
| <b>IGFALS</b>     | -1.66 | 6.48E-02 | 1.00E+00 | 1.23  | 2.69E-01 | 8.04E-01 |
| <b>NAP1L4P1</b>   | 0.64  | 5.39E-01 | 1.00E+00 | 0.84  | 2.69E-01 | 8.04E-01 |
| <b>WDR91</b>      | 0.05  | 8.41E-01 | 1.00E+00 | 0.52  | 2.69E-01 | 8.04E-01 |
| <b>GREM2</b>      | 0.07  | 8.55E-01 | 1.00E+00 | 0.69  | 2.69E-01 | 8.04E-01 |
| <b>BCAS1</b>      | -0.15 | 8.46E-01 | 1.00E+00 | -0.65 | 2.70E-01 | 8.04E-01 |
| <b>AL359220.1</b> | 0.08  | 8.08E-01 | 1.00E+00 | -0.39 | 2.70E-01 | 8.04E-01 |
| <b>AC018557.2</b> | 2.85  | 2.15E-01 | 1.00E+00 | 1.25  | 2.70E-01 | 8.04E-01 |
| <b>LRWD1</b>      | -0.09 | 6.97E-01 | 1.00E+00 | 0.38  | 2.70E-01 | 8.04E-01 |
| <b>KTN1-AS1</b>   | -0.43 | 2.07E-01 | 1.00E+00 | -0.41 | 2.70E-01 | 8.04E-01 |
| <b>AC242988.2</b> | 1.12  | 6.05E-01 | 1.00E+00 | 1.85  | 2.70E-01 | 8.04E-01 |
| <b>AC068594.1</b> | 1.71  | 2.96E-01 | 1.00E+00 | 1.04  | 2.70E-01 | 8.04E-01 |
| <b>CNOT7</b>      | 0.13  | 4.02E-01 | 1.00E+00 | -0.32 | 2.70E-01 | 8.04E-01 |
| <b>SAR1B</b>      | -0.01 | 9.53E-01 | 1.00E+00 | -0.31 | 2.70E-01 | 8.04E-01 |

|                   |       |          |          |       |          |          |
|-------------------|-------|----------|----------|-------|----------|----------|
| <b>AL031727.1</b> | 0.42  | 7.98E-01 | 1.00E+00 | -0.79 | 2.70E-01 | 8.04E-01 |
| <b>ZNF433</b>     | -0.26 | 3.34E-01 | 1.00E+00 | -0.46 | 2.70E-01 | 8.04E-01 |
| <b>PRDX5</b>      | 0.02  | 9.28E-01 | 1.00E+00 | 0.22  | 2.70E-01 | 8.04E-01 |
| <b>IL1RAP</b>     | -0.06 | 8.81E-01 | 1.00E+00 | 0.29  | 2.70E-01 | 8.04E-01 |
| <b>COA3</b>       | 0.03  | 8.70E-01 | 1.00E+00 | -0.38 | 2.70E-01 | 8.04E-01 |
| <b>FAM174A</b>    | 0.18  | 5.58E-01 | 1.00E+00 | -0.29 | 2.70E-01 | 8.04E-01 |
| <b>CLVS2</b>      | -1.18 | 1.18E-01 | 1.00E+00 | -1.17 | 2.70E-01 | 8.04E-01 |
| <b>ST3GAL2</b>    | -0.07 | 8.01E-01 | 1.00E+00 | 0.64  | 2.70E-01 | 8.04E-01 |
| <b>SYT2</b>       | -0.44 | 6.91E-01 | 1.00E+00 | 0.84  | 2.70E-01 | 8.04E-01 |
| <b>ZNF324B</b>    | -0.06 | 8.49E-01 | 1.00E+00 | 0.60  | 2.71E-01 | 8.05E-01 |
| <b>PARP16</b>     | 0.08  | 6.82E-01 | 1.00E+00 | -0.38 | 2.71E-01 | 8.05E-01 |
| <b>ATL3</b>       | 0.42  | 4.99E-02 | 1.00E+00 | -0.36 | 2.71E-01 | 8.05E-01 |
| <b>RMI1</b>       | -0.34 | 2.81E-01 | 1.00E+00 | -0.33 | 2.71E-01 | 8.05E-01 |
| <b>SLC36A2</b>    | -2.46 | 2.91E-01 | 1.00E+00 | -0.97 | 2.71E-01 | 8.05E-01 |
| <b>PAK2</b>       | 0.02  | 9.01E-01 | 1.00E+00 | 0.33  | 2.71E-01 | 8.05E-01 |
| <b>CACNA1A</b>    | -0.36 | 5.61E-01 | 1.00E+00 | 0.91  | 2.71E-01 | 8.05E-01 |
| <b>C9orf147</b>   | -2.38 | 4.46E-02 | 1.00E+00 | 0.84  | 2.71E-01 | 8.05E-01 |
| <b>MAFF</b>       | -0.18 | 7.52E-01 | 1.00E+00 | 0.45  | 2.71E-01 | 8.06E-01 |
| <b>PPIL4</b>      | 0.23  | 3.67E-01 | 1.00E+00 | -0.31 | 2.71E-01 | 8.06E-01 |
| <b>TMEM43</b>     | 0.21  | 3.35E-01 | 1.00E+00 | -0.23 | 2.71E-01 | 8.06E-01 |
| <b>UNC5B-AS1</b>  | -0.44 | 5.59E-01 | 1.00E+00 | 0.77  | 2.71E-01 | 8.06E-01 |
| <b>FKBP3</b>      | -0.14 | 5.53E-01 | 1.00E+00 | -0.35 | 2.71E-01 | 8.06E-01 |
| <b>ACSL3</b>      | 0.31  | 4.50E-01 | 1.00E+00 | -0.31 | 2.71E-01 | 8.06E-01 |
| <b>COIL</b>       | -0.10 | 6.21E-01 | 1.00E+00 | -0.29 | 2.71E-01 | 8.06E-01 |
| <b>ZGPAT</b>      | -0.18 | 5.45E-01 | 1.00E+00 | 0.39  | 2.71E-01 | 8.06E-01 |
| <b>ZC3H12A</b>    | -1.77 | 8.49E-03 | 5.68E-01 | 0.69  | 2.71E-01 | 8.06E-01 |
| <b>CHMP4A</b>     | 0.56  | 2.02E-01 | 1.00E+00 | 0.59  | 2.71E-01 | 8.06E-01 |
| <b>GLMN</b>       | 0.22  | 3.97E-01 | 1.00E+00 | 0.37  | 2.71E-01 | 8.06E-01 |
| <b>Z93241.1</b>   | -0.45 | 6.94E-01 | 1.00E+00 | -1.91 | 2.71E-01 | 8.06E-01 |
| <b>PI15</b>       | -1.76 | 3.55E-04 | 7.50E-02 | 1.07  | 2.72E-01 | 8.06E-01 |
| <b>AC127521.1</b> | 1.27  | 3.92E-01 | 1.00E+00 | -0.99 | 2.72E-01 | 8.06E-01 |
| <b>SAMD3</b>      | 0.13  | 8.92E-01 | 1.00E+00 | 1.27  | 2.72E-01 | 8.06E-01 |

|                    |       |          |          |       |          |          |
|--------------------|-------|----------|----------|-------|----------|----------|
| <b>AC105760.1</b>  | NA    | NA       | NA       | 2.41  | 2.72E-01 | 8.06E-01 |
| <b>AL121987.2</b>  | 0.84  | 8.00E-01 | 1.00E+00 | -1.02 | 2.72E-01 | 8.06E-01 |
| <b>AL596202.1</b>  | 1.05  | 1.93E-01 | 1.00E+00 | -0.76 | 2.72E-01 | 8.06E-01 |
| <b>AC104339.1</b>  | NA    | NA       | NA       | 1.09  | 2.72E-01 | 8.06E-01 |
| <b>OLFM1</b>       | -0.19 | 6.08E-01 | 1.00E+00 | -0.61 | 2.72E-01 | 8.06E-01 |
| <b>PSMA3</b>       | -0.02 | 9.39E-01 | 1.00E+00 | -0.23 | 2.72E-01 | 8.06E-01 |
| <b>PLA2G16</b>     | 1.86  | 8.63E-02 | 1.00E+00 | -0.68 | 2.72E-01 | 8.06E-01 |
| <b>NUP50</b>       | 0.09  | 7.31E-01 | 1.00E+00 | 0.17  | 2.72E-01 | 8.06E-01 |
| <b>AFF4</b>        | -0.12 | 4.07E-01 | 1.00E+00 | 0.39  | 2.72E-01 | 8.06E-01 |
| <b>RP11-87H9.3</b> | -0.58 | 6.35E-01 | 1.00E+00 | -0.73 | 2.72E-01 | 8.06E-01 |
| <b>G22375</b>      | -0.04 | 9.75E-01 | 1.00E+00 | 0.86  | 2.72E-01 | 8.06E-01 |
| <b>ITSN2</b>       | 0.07  | 8.12E-01 | 1.00E+00 | -0.22 | 2.72E-01 | 8.07E-01 |
| <b>DHX32</b>       | -0.08 | 7.96E-01 | 1.00E+00 | -0.39 | 2.72E-01 | 8.07E-01 |
| <b>AL031722.1</b>  | -2.95 | 3.16E-02 | 1.00E+00 | 0.81  | 2.72E-01 | 8.07E-01 |
| <b>PENK</b>        | 0.36  | 5.70E-01 | 1.00E+00 | 0.75  | 2.72E-01 | 8.07E-01 |
| <b>XLOC_000340</b> | -0.94 | 7.78E-01 | 1.00E+00 | -1.28 | 2.72E-01 | 8.07E-01 |
| <b>TMEM159</b>     | 0.27  | 1.86E-01 | 1.00E+00 | -0.29 | 2.72E-01 | 8.07E-01 |
| <b>L3MBTL1</b>     | 0.24  | 6.30E-01 | 1.00E+00 | -0.74 | 2.72E-01 | 8.07E-01 |
| <b>CREBRF</b>      | 0.17  | 4.40E-01 | 1.00E+00 | -0.38 | 2.72E-01 | 8.07E-01 |
| <b>OXSRI</b>       | 0.28  | 1.14E-01 | 1.00E+00 | 0.36  | 2.72E-01 | 8.07E-01 |
| <b>AC003991.1</b>  | NA    | NA       | NA       | 1.27  | 2.72E-01 | 8.07E-01 |
| <b>MEP1A</b>       | -0.87 | 7.40E-01 | 1.00E+00 | 1.65  | 2.73E-01 | 8.07E-01 |
| <b>AL158211.1</b>  | 1.00  | 6.00E-01 | 1.00E+00 | -1.93 | 2.73E-01 | 8.07E-01 |
| <b>COX7CP1</b>     | 0.06  | 9.79E-01 | 1.00E+00 | -0.72 | 2.73E-01 | 8.07E-01 |
| <b>SCUBE2</b>      | 0.04  | 9.14E-01 | 1.00E+00 | -0.46 | 2.73E-01 | 8.07E-01 |
| <b>ARHGAP6</b>     | 0.41  | 3.08E-01 | 1.00E+00 | 0.56  | 2.73E-01 | 8.07E-01 |
| <b>PSMA6</b>       | -0.32 | 5.03E-01 | 1.00E+00 | 0.72  | 2.73E-01 | 8.07E-01 |
| <b>S100A5</b>      | 0.63  | 3.72E-01 | 1.00E+00 | 0.84  | 2.73E-01 | 8.07E-01 |
| <b>AC008969.1</b>  | -0.12 | 7.92E-01 | 1.00E+00 | 0.60  | 2.73E-01 | 8.07E-01 |
| <b>EPB41L2</b>     | 0.31  | 4.55E-01 | 1.00E+00 | 0.52  | 2.73E-01 | 8.07E-01 |
| <b>KSR1</b>        | -0.30 | 2.81E-01 | 1.00E+00 | 0.63  | 2.73E-01 | 8.07E-01 |
| <b>BCKDK</b>       | -0.07 | 7.72E-01 | 1.00E+00 | 0.20  | 2.73E-01 | 8.07E-01 |



|                    |       |          |          |       |          |          |
|--------------------|-------|----------|----------|-------|----------|----------|
| <b>OBP2A</b>       | -2.12 | 1.34E-01 | 1.00E+00 | -0.86 | 2.73E-01 | 8.07E-01 |
| <b>PIK3CB</b>      | 0.17  | 4.72E-01 | 1.00E+00 | -0.25 | 2.73E-01 | 8.07E-01 |
| <b>ULK2</b>        | 0.19  | 3.44E-01 | 1.00E+00 | -0.49 | 2.73E-01 | 8.07E-01 |
| <b>PHC2</b>        | 0.03  | 9.16E-01 | 1.00E+00 | 0.67  | 2.73E-01 | 8.07E-01 |
| <b>XLOC_002882</b> | -0.81 | 8.13E-01 | 1.00E+00 | 1.85  | 2.73E-01 | 8.07E-01 |
| <b>REXO2</b>       | 0.22  | 3.52E-01 | 1.00E+00 | -0.42 | 2.73E-01 | 8.07E-01 |
| <b>H1F0</b>        | -0.19 | 3.89E-01 | 1.00E+00 | 0.35  | 2.73E-01 | 8.07E-01 |
| <b>CGREF1</b>      | -0.10 | 8.74E-01 | 1.00E+00 | 0.85  | 2.73E-01 | 8.07E-01 |
| <b>TADA3</b>       | -0.07 | 7.75E-01 | 1.00E+00 | 0.28  | 2.73E-01 | 8.07E-01 |
| <b>ST3GAL4</b>     | -0.06 | 8.75E-01 | 1.00E+00 | 0.32  | 2.73E-01 | 8.07E-01 |
| <b>DCAF15</b>      | -0.21 | 3.88E-01 | 1.00E+00 | 0.56  | 2.73E-01 | 8.07E-01 |
| <b>IGKV1-9</b>     | 5.23  | 1.15E-01 | 1.00E+00 | 3.46  | 2.73E-01 | 8.07E-01 |
| <b>TMA16</b>       | 0.03  | 9.15E-01 | 1.00E+00 | -0.31 | 2.73E-01 | 8.07E-01 |
| <b>MYL12BP2</b>    | 1.41  | 2.35E-01 | 1.00E+00 | -1.04 | 2.73E-01 | 8.07E-01 |
| <b>AC024909.2</b>  | 3.31  | 2.83E-01 | 1.00E+00 | -1.18 | 2.73E-01 | 8.07E-01 |
| <b>POLE4</b>       | -0.08 | 6.74E-01 | 1.00E+00 | -0.36 | 2.73E-01 | 8.07E-01 |
| <b>AC084033.3</b>  | 0.74  | 1.72E-01 | 1.00E+00 | -0.44 | 2.73E-01 | 8.07E-01 |
| <b>PKN1</b>        | 0.20  | 6.76E-01 | 1.00E+00 | 0.74  | 2.73E-01 | 8.07E-01 |
| <b>EPHX4</b>       | -0.73 | 4.16E-01 | 1.00E+00 | -0.78 | 2.73E-01 | 8.07E-01 |
| <b>RPL13A</b>      | -0.14 | 6.39E-01 | 1.00E+00 | 0.32  | 2.73E-01 | 8.07E-01 |
| <b>IGHV1-2</b>     | 6.41  | 2.41E-04 | 5.49E-02 | 3.45  | 2.74E-01 | 8.07E-01 |
| <b>CCNI2</b>       | -2.35 | 8.79E-02 | 1.00E+00 | 1.43  | 2.74E-01 | 8.07E-01 |
| <b>SH2D4B</b>      | -0.24 | 9.02E-01 | 1.00E+00 | 1.22  | 2.74E-01 | 8.07E-01 |
| <b>ZFP91</b>       | 0.12  | 5.26E-01 | 1.00E+00 | 0.20  | 2.74E-01 | 8.07E-01 |
| <b>CWF19L1</b>     | -0.12 | 6.26E-01 | 1.00E+00 | -0.22 | 2.74E-01 | 8.07E-01 |
| <b>XLOC_007955</b> | 1.70  | 5.40E-01 | 1.00E+00 | 1.03  | 2.74E-01 | 8.07E-01 |
| <b>CGRRF1</b>      | 0.29  | 2.92E-01 | 1.00E+00 | -0.39 | 2.74E-01 | 8.07E-01 |
| <b>APOL2</b>       | -0.48 | 3.20E-01 | 1.00E+00 | 0.61  | 2.74E-01 | 8.07E-01 |
| <b>TOP2B</b>       | -0.02 | 8.95E-01 | 1.00E+00 | -0.36 | 2.74E-01 | 8.07E-01 |
| <b>BLNK</b>        | -0.29 | 4.71E-01 | 1.00E+00 | 0.41  | 2.74E-01 | 8.07E-01 |
| <b>PRSS21</b>      | -2.09 | 8.91E-03 | 5.87E-01 | -0.71 | 2.74E-01 | 8.07E-01 |
| <b>NUPL2</b>       | -0.17 | 5.18E-01 | 1.00E+00 | -0.29 | 2.74E-01 | 8.08E-01 |

|                   |       |          |          |       |          |          |
|-------------------|-------|----------|----------|-------|----------|----------|
| <b>OARD1</b>      | 0.23  | 2.36E-01 | 1.00E+00 | -0.27 | 2.74E-01 | 8.08E-01 |
| <b>APBB1IP</b>    | 1.04  | 1.35E-01 | 1.00E+00 | 0.78  | 2.74E-01 | 8.08E-01 |
| <b>TNNI3</b>      | -0.86 | 3.69E-01 | 1.00E+00 | 1.01  | 2.74E-01 | 8.08E-01 |
| <b>G33879</b>     | -0.15 | 9.15E-01 | 1.00E+00 | 1.34  | 2.74E-01 | 8.08E-01 |
| <b>ZNF281</b>     | 0.07  | 8.24E-01 | 1.00E+00 | 0.28  | 2.74E-01 | 8.08E-01 |
| <b>DEDD2</b>      | -0.20 | 5.40E-01 | 1.00E+00 | 0.24  | 2.74E-01 | 8.08E-01 |
| <b>PLXNB1</b>     | -0.15 | 5.29E-01 | 1.00E+00 | 0.52  | 2.74E-01 | 8.08E-01 |
| <b>G6PC3</b>      | 0.06  | 8.90E-01 | 1.00E+00 | 0.34  | 2.74E-01 | 8.08E-01 |
| <b>TERC</b>       | -2.83 | 2.07E-01 | 1.00E+00 | -0.68 | 2.75E-01 | 8.08E-01 |
| <b>CTNND2</b>     | -0.37 | 9.02E-01 | 1.00E+00 | -1.18 | 2.75E-01 | 8.08E-01 |
| <b>TRIM45</b>     | 0.19  | 5.22E-01 | 1.00E+00 | 0.58  | 2.75E-01 | 8.08E-01 |
| <b>SYT11</b>      | -0.18 | 7.29E-01 | 1.00E+00 | 0.60  | 2.75E-01 | 8.08E-01 |
| <b>PAOX</b>       | 0.04  | 8.48E-01 | 1.00E+00 | -0.64 | 2.75E-01 | 8.08E-01 |
| <b>WDPCP</b>      | 0.28  | 4.13E-01 | 1.00E+00 | -0.41 | 2.75E-01 | 8.08E-01 |
| <b>DCUN1D5</b>    | -0.22 | 3.57E-01 | 1.00E+00 | 0.25  | 2.75E-01 | 8.08E-01 |
| <b>URB1</b>       | 0.11  | 5.87E-01 | 1.00E+00 | 0.45  | 2.75E-01 | 8.08E-01 |
| <b>AC073548.1</b> | -2.36 | 1.75E-01 | 1.00E+00 | 1.26  | 2.75E-01 | 8.08E-01 |
| <b>ATP5MC1</b>    | -0.17 | 3.01E-01 | 1.00E+00 | -0.42 | 2.75E-01 | 8.08E-01 |
| <b>LINC01940</b>  | 1.18  | 3.90E-01 | 1.00E+00 | 1.68  | 2.75E-01 | 8.08E-01 |
| <b>CTNNAL1</b>    | 0.04  | 8.84E-01 | 1.00E+00 | -0.35 | 2.75E-01 | 8.08E-01 |
| <b>ENHO</b>       | 0.79  | 2.05E-01 | 1.00E+00 | -0.63 | 2.75E-01 | 8.08E-01 |
| <b>CARD9</b>      | -0.93 | 2.78E-02 | 9.71E-01 | 0.63  | 2.75E-01 | 8.08E-01 |
| <b>AC113410.2</b> | 0.19  | 7.43E-01 | 1.00E+00 | 0.71  | 2.75E-01 | 8.08E-01 |
| <b>LIPE-AS1</b>   | 2.60  | 8.61E-04 | 1.48E-01 | -0.67 | 2.75E-01 | 8.08E-01 |
| <b>TRIM56</b>     | 0.26  | 3.94E-01 | 1.00E+00 | 0.54  | 2.75E-01 | 8.08E-01 |
| <b>VDAC3</b>      | 0.02  | 9.11E-01 | 1.00E+00 | -0.28 | 2.75E-01 | 8.08E-01 |
| <b>AC010976.1</b> | 0.88  | 5.42E-01 | 1.00E+00 | 1.20  | 2.75E-01 | 8.08E-01 |
| <b>TFAP2A-AS2</b> | -2.95 | 2.03E-02 | 8.88E-01 | 0.92  | 2.75E-01 | 8.08E-01 |
| <b>TPST1</b>      | 0.34  | 2.18E-01 | 1.00E+00 | 0.34  | 2.75E-01 | 8.08E-01 |
| <b>AC138393.1</b> | -0.43 | 2.22E-01 | 1.00E+00 | -0.57 | 2.76E-01 | 8.08E-01 |
| <b>AC005550.2</b> | -0.11 | 9.67E-01 | 1.00E+00 | -1.33 | 2.76E-01 | 8.08E-01 |
| <b>ZC3HC1</b>     | 0.24  | 4.35E-01 | 1.00E+00 | -0.31 | 2.76E-01 | 8.08E-01 |

|             |       |          |          |       |          |          |
|-------------|-------|----------|----------|-------|----------|----------|
| ITIH6       | 1.05  | 5.33E-01 | 1.00E+00 | -1.39 | 2.76E-01 | 8.08E-01 |
| PCP4        | -0.18 | 8.07E-01 | 1.00E+00 | -0.69 | 2.76E-01 | 8.08E-01 |
| PIN4P1      | -0.75 | 8.29E-01 | 1.00E+00 | -1.09 | 2.76E-01 | 8.08E-01 |
| TCIM        | 0.09  | 7.92E-01 | 1.00E+00 | 0.55  | 2.76E-01 | 8.08E-01 |
| LZTFL1      | -0.05 | 8.07E-01 | 1.00E+00 | -0.25 | 2.76E-01 | 8.08E-01 |
| RSPO3       | 0.08  | 8.82E-01 | 1.00E+00 | 0.66  | 2.76E-01 | 8.08E-01 |
| DDX21       | -0.24 | 4.08E-01 | 1.00E+00 | 0.40  | 2.76E-01 | 8.08E-01 |
| TFB1M       | 0.02  | 9.30E-01 | 1.00E+00 | -0.45 | 2.76E-01 | 8.08E-01 |
| G18534      | -0.26 | 7.57E-01 | 1.00E+00 | -0.86 | 2.76E-01 | 8.08E-01 |
| SLC39A3     | -0.30 | 2.44E-01 | 1.00E+00 | 0.25  | 2.76E-01 | 8.08E-01 |
| RPS3        | -0.19 | 5.48E-01 | 1.00E+00 | 0.31  | 2.76E-01 | 8.08E-01 |
| AL109809.1  | -0.22 | 8.39E-01 | 1.00E+00 | 0.81  | 2.76E-01 | 8.08E-01 |
| ARL17B      | 0.93  | 1.21E-01 | 1.00E+00 | 0.51  | 2.76E-01 | 8.08E-01 |
| TMEM51      | -0.06 | 8.48E-01 | 1.00E+00 | 0.59  | 2.76E-01 | 8.08E-01 |
| LINC00528   | -1.99 | 2.64E-01 | 1.00E+00 | 1.47  | 2.76E-01 | 8.08E-01 |
| WASHC3      | -0.17 | 3.76E-01 | 1.00E+00 | -0.37 | 2.76E-01 | 8.08E-01 |
| XLOC_008614 | -2.40 | 3.96E-01 | 1.00E+00 | 0.87  | 2.76E-01 | 8.08E-01 |
| DDX24       | -0.04 | 8.03E-01 | 1.00E+00 | 0.17  | 2.76E-01 | 8.08E-01 |
| TTC23L      | -0.57 | 4.66E-01 | 1.00E+00 | 0.95  | 2.76E-01 | 8.08E-01 |
| XLOC_014129 | 1.09  | 1.10E-01 | 1.00E+00 | 1.12  | 2.76E-01 | 8.08E-01 |
| ZNF101      | -0.20 | 4.86E-01 | 1.00E+00 | 0.32  | 2.76E-01 | 8.08E-01 |
| MAN1B1      | -0.09 | 6.41E-01 | 1.00E+00 | 0.21  | 2.76E-01 | 8.08E-01 |
| XLOC_010693 | -1.21 | 4.37E-01 | 1.00E+00 | -0.77 | 2.76E-01 | 8.08E-01 |
| KIF3C       | -0.28 | 4.36E-01 | 1.00E+00 | 0.74  | 2.76E-01 | 8.08E-01 |
| LINC00667   | -0.13 | 6.98E-01 | 1.00E+00 | -0.29 | 2.76E-01 | 8.08E-01 |
| TERF2       | -0.14 | 4.82E-01 | 1.00E+00 | -0.27 | 2.76E-01 | 8.09E-01 |
| ZFAS1       | 0.04  | 9.03E-01 | 1.00E+00 | 0.30  | 2.77E-01 | 8.09E-01 |
| G32019      | -1.00 | 5.58E-01 | 1.00E+00 | -0.98 | 2.77E-01 | 8.09E-01 |
| Z84484.1    | 0.24  | 8.72E-01 | 1.00E+00 | 1.02  | 2.77E-01 | 8.09E-01 |
| PDGFRB      | -0.19 | 6.61E-01 | 1.00E+00 | 0.77  | 2.77E-01 | 8.09E-01 |
| INTS6-AS1   | -0.57 | 5.03E-01 | 1.00E+00 | -0.57 | 2.77E-01 | 8.09E-01 |
| TCTN2       | 0.13  | 4.92E-01 | 1.00E+00 | 0.51  | 2.77E-01 | 8.09E-01 |

|                    |       |          |          |       |          |          |
|--------------------|-------|----------|----------|-------|----------|----------|
| <b>GSTM1</b>       | 3.32  | 3.03E-01 | 1.00E+00 | 3.41  | 2.77E-01 | 8.09E-01 |
| <b>CYSRT1</b>      | -0.18 | 7.61E-01 | 1.00E+00 | 0.69  | 2.77E-01 | 8.09E-01 |
| <b>TMEM221</b>     | -0.03 | 9.72E-01 | 1.00E+00 | -1.02 | 2.77E-01 | 8.09E-01 |
| <b>ATXN7L3B</b>    | 0.15  | 3.75E-01 | 1.00E+00 | -0.20 | 2.77E-01 | 8.09E-01 |
| <b>XLOC_001457</b> | 0.03  | 9.85E-01 | 1.00E+00 | 1.59  | 2.77E-01 | 8.09E-01 |
| <b>RTTN</b>        | 0.43  | 2.52E-01 | 1.00E+00 | 0.53  | 2.77E-01 | 8.09E-01 |
| <b>PCMTD1</b>      | 0.11  | 7.55E-01 | 1.00E+00 | -0.28 | 2.77E-01 | 8.09E-01 |
| <b>TMEM25</b>      | -0.02 | 9.58E-01 | 1.00E+00 | -0.28 | 2.77E-01 | 8.09E-01 |
| <b>TBX2</b>        | -0.03 | 9.51E-01 | 1.00E+00 | 1.02  | 2.77E-01 | 8.09E-01 |
| <b>AMD1</b>        | 0.06  | 8.27E-01 | 1.00E+00 | 0.19  | 2.77E-01 | 8.09E-01 |
| <b>AC122688.3</b>  | 0.59  | 5.67E-01 | 1.00E+00 | 0.72  | 2.77E-01 | 8.09E-01 |
| <b>RNASE1</b>      | 0.07  | 8.85E-01 | 1.00E+00 | 0.49  | 2.77E-01 | 8.09E-01 |
| <b>ASPN</b>        | 0.04  | 9.39E-01 | 1.00E+00 | 0.47  | 2.77E-01 | 8.09E-01 |
| <b>FAM53B</b>      | -0.33 | 2.34E-01 | 1.00E+00 | 0.58  | 2.77E-01 | 8.09E-01 |
| <b>RABL6</b>       | -0.14 | 5.86E-01 | 1.00E+00 | 0.66  | 2.77E-01 | 8.09E-01 |
| <b>CDC6</b>        | -0.32 | 3.91E-01 | 1.00E+00 | 0.46  | 2.77E-01 | 8.09E-01 |
| <b>AC097662.1</b>  | 0.62  | 3.76E-01 | 1.00E+00 | -1.02 | 2.77E-01 | 8.09E-01 |
| <b>MT-ATP8</b>     | -0.25 | 5.51E-01 | 1.00E+00 | -0.63 | 2.78E-01 | 8.09E-01 |
| <b>RPL35P5</b>     | 0.13  | 8.92E-01 | 1.00E+00 | -0.66 | 2.78E-01 | 8.09E-01 |
| <b>AP001469.3</b>  | 0.36  | 5.23E-01 | 1.00E+00 | 0.82  | 2.78E-01 | 8.09E-01 |
| <b>ABCA17P</b>     | 1.07  | 3.17E-01 | 1.00E+00 | -0.86 | 2.78E-01 | 8.09E-01 |
| <b>SMIM26</b>      | 0.46  | 1.48E-01 | 1.00E+00 | -0.62 | 2.78E-01 | 8.10E-01 |
| <b>RBM20</b>       | -0.33 | 5.68E-01 | 1.00E+00 | 0.87  | 2.78E-01 | 8.10E-01 |
| <b>AP4S1</b>       | -0.01 | 9.72E-01 | 1.00E+00 | 0.23  | 2.78E-01 | 8.10E-01 |
| <b>SERPINA9</b>    | -0.93 | 4.62E-01 | 1.00E+00 | -1.22 | 2.78E-01 | 8.10E-01 |
| <b>FKBP4</b>       | -0.30 | 1.10E-01 | 1.00E+00 | -0.32 | 2.78E-01 | 8.10E-01 |
| <b>CTPS1</b>       | -0.50 | 3.78E-02 | 1.00E+00 | 0.38  | 2.78E-01 | 8.10E-01 |
| <b>GHDC</b>        | 0.15  | 6.03E-01 | 1.00E+00 | 0.70  | 2.78E-01 | 8.10E-01 |
| <b>PJKV</b>        | 0.74  | 3.42E-01 | 1.00E+00 | -0.66 | 2.78E-01 | 8.10E-01 |
| <b>LACTB2</b>      | -0.49 | 1.14E-01 | 1.00E+00 | -0.45 | 2.78E-01 | 8.10E-01 |
| <b>AC105749.1</b>  | 0.27  | 8.35E-01 | 1.00E+00 | 1.06  | 2.78E-01 | 8.10E-01 |
| <b>PGAM1</b>       | -0.12 | 5.06E-01 | 1.00E+00 | 0.31  | 2.78E-01 | 8.10E-01 |

|                   |       |          |          |       |          |          |
|-------------------|-------|----------|----------|-------|----------|----------|
| <b>PIF1</b>       | -0.30 | 7.49E-01 | 1.00E+00 | 1.30  | 2.78E-01 | 8.10E-01 |
| <b>WDR61</b>      | 0.14  | 4.26E-01 | 1.00E+00 | -0.34 | 2.78E-01 | 8.10E-01 |
| <b>UGGT2</b>      | 0.11  | 7.31E-01 | 1.00E+00 | -0.34 | 2.78E-01 | 8.10E-01 |
| <b>VPS33B</b>     | 0.74  | 1.40E-01 | 1.00E+00 | -0.38 | 2.78E-01 | 8.10E-01 |
| <b>BICD1</b>      | -0.40 | 1.60E-01 | 1.00E+00 | 0.51  | 2.78E-01 | 8.10E-01 |
| <b>DNAAF2</b>     | 0.07  | 8.06E-01 | 1.00E+00 | -0.30 | 2.78E-01 | 8.10E-01 |
| <b>SNHG10</b>     | -0.51 | 3.90E-01 | 1.00E+00 | -0.53 | 2.78E-01 | 8.10E-01 |
| <b>AC002511.1</b> | 0.55  | 8.65E-01 | 1.00E+00 | 1.77  | 2.78E-01 | 8.10E-01 |
| <b>IRF4</b>       | 0.09  | 8.50E-01 | 1.00E+00 | -0.41 | 2.79E-01 | 8.10E-01 |
| <b>AC008264.2</b> | 0.10  | 9.77E-01 | 1.00E+00 | 2.23  | 2.79E-01 | 8.10E-01 |
| <b>CUX1</b>       | 0.01  | 9.83E-01 | 1.00E+00 | 0.30  | 2.79E-01 | 8.10E-01 |
| <b>AC110079.1</b> | -0.70 | 1.34E-01 | 1.00E+00 | 0.82  | 2.79E-01 | 8.10E-01 |
| <b>YTHDC1</b>     | 0.06  | 7.45E-01 | 1.00E+00 | 0.30  | 2.79E-01 | 8.10E-01 |
| <b>ZRSR2</b>      | -0.06 | 7.89E-01 | 1.00E+00 | -0.41 | 2.79E-01 | 8.10E-01 |
| <b>SYNE2</b>      | -0.50 | 3.20E-02 | 1.00E+00 | -0.34 | 2.79E-01 | 8.10E-01 |
| <b>AC007529.2</b> | 3.87  | 1.74E-01 | 1.00E+00 | -1.37 | 2.79E-01 | 8.10E-01 |
| <b>ZFYVE27</b>    | 0.13  | 6.87E-01 | 1.00E+00 | 0.27  | 2.79E-01 | 8.10E-01 |
| <b>AL357060.1</b> | 0.28  | 5.34E-01 | 1.00E+00 | 0.39  | 2.79E-01 | 8.10E-01 |
| <b>TINF2</b>      | 0.03  | 8.37E-01 | 1.00E+00 | 0.19  | 2.79E-01 | 8.10E-01 |
| <b>HINT1</b>      | -0.07 | 7.37E-01 | 1.00E+00 | -0.34 | 2.79E-01 | 8.10E-01 |
| <b>MGAM2</b>      | 0.41  | 7.51E-01 | 1.00E+00 | 1.60  | 2.79E-01 | 8.10E-01 |
| <b>ATP10A</b>     | 0.26  | 5.42E-01 | 1.00E+00 | 0.81  | 2.79E-01 | 8.10E-01 |
| <b>RCOR1</b>      | 0.03  | 9.06E-01 | 1.00E+00 | 0.50  | 2.79E-01 | 8.10E-01 |
| <b>FAM86C1</b>    | -0.21 | 6.74E-01 | 1.00E+00 | 0.32  | 2.79E-01 | 8.10E-01 |
| <b>LINC01679</b>  | -0.51 | 1.86E-01 | 1.00E+00 | 0.39  | 2.79E-01 | 8.10E-01 |
| <b>LINC00242</b>  | -1.96 | 1.08E-01 | 1.00E+00 | 0.62  | 2.79E-01 | 8.10E-01 |
| <b>AMTN</b>       | -1.70 | 1.89E-01 | 1.00E+00 | -1.53 | 2.79E-01 | 8.10E-01 |
| <b>RGPD8</b>      | -0.07 | 8.79E-01 | 1.00E+00 | 0.59  | 2.79E-01 | 8.10E-01 |
| <b>TCP11L1</b>    | 0.27  | 3.82E-01 | 1.00E+00 | 0.42  | 2.79E-01 | 8.10E-01 |
| <b>SCRN2</b>      | 0.19  | 6.26E-01 | 1.00E+00 | -0.35 | 2.79E-01 | 8.10E-01 |
| <b>MRTFA-AS1</b>  | 0.91  | 7.54E-01 | 1.00E+00 | 1.29  | 2.79E-01 | 8.10E-01 |
| <b>SMIM8</b>      | -0.02 | 9.55E-01 | 1.00E+00 | -0.52 | 2.79E-01 | 8.10E-01 |

|             |       |          |          |       |          |          |
|-------------|-------|----------|----------|-------|----------|----------|
| LAGE3       | -0.16 | 5.87E-01 | 1.00E+00 | -0.42 | 2.79E-01 | 8.10E-01 |
| PCSK7       | -0.07 | 7.56E-01 | 1.00E+00 | 0.55  | 2.79E-01 | 8.10E-01 |
| SLC9A6      | 0.03  | 8.55E-01 | 1.00E+00 | -0.22 | 2.79E-01 | 8.10E-01 |
| MNAT1       | 0.18  | 5.07E-01 | 1.00E+00 | -0.33 | 2.79E-01 | 8.10E-01 |
| ZNF77       | -0.23 | 3.27E-01 | 1.00E+00 | -0.33 | 2.79E-01 | 8.10E-01 |
| PNPLA4      | -0.16 | 4.59E-01 | 1.00E+00 | -0.28 | 2.80E-01 | 8.10E-01 |
| CXorf57     | 0.38  | 2.13E-01 | 1.00E+00 | 0.59  | 2.80E-01 | 8.10E-01 |
| TTC17       | -0.05 | 8.14E-01 | 1.00E+00 | 0.18  | 2.80E-01 | 8.10E-01 |
| MDH2        | -0.13 | 4.91E-01 | 1.00E+00 | -0.21 | 2.80E-01 | 8.11E-01 |
| TMEM254     | 0.05  | 8.78E-01 | 1.00E+00 | -0.53 | 2.80E-01 | 8.11E-01 |
| S100A3      | -2.23 | 1.22E-03 | 1.86E-01 | 0.69  | 2.80E-01 | 8.11E-01 |
| ZCCHC9      | 0.28  | 3.20E-01 | 1.00E+00 | 0.14  | 2.80E-01 | 8.11E-01 |
| WTIP        | 0.15  | 7.35E-01 | 1.00E+00 | 0.80  | 2.80E-01 | 8.11E-01 |
| TBATA       | -0.30 | 7.54E-01 | 1.00E+00 | -0.91 | 2.80E-01 | 8.11E-01 |
| EPHA1-AS1   | -0.52 | 4.63E-01 | 1.00E+00 | -0.66 | 2.80E-01 | 8.11E-01 |
| XLOC_002897 | 0.44  | 8.12E-01 | 1.00E+00 | 1.08  | 2.80E-01 | 8.11E-01 |
| C1RL-AS1    | 0.13  | 8.72E-01 | 1.00E+00 | 0.56  | 2.80E-01 | 8.11E-01 |
| AC110619.1  | -0.92 | 3.19E-01 | 1.00E+00 | 1.11  | 2.80E-01 | 8.11E-01 |
| SUSD4       | -0.15 | 7.42E-01 | 1.00E+00 | -0.50 | 2.80E-01 | 8.11E-01 |
| AP000892.3  | -1.35 | 1.51E-01 | 1.00E+00 | 0.65  | 2.80E-01 | 8.11E-01 |
| LMNB1       | -0.13 | 6.03E-01 | 1.00E+00 | 0.58  | 2.80E-01 | 8.11E-01 |
| TTI1        | 0.11  | 6.54E-01 | 1.00E+00 | -0.30 | 2.80E-01 | 8.11E-01 |
| AC004241.5  | 0.48  | 7.41E-01 | 1.00E+00 | -0.89 | 2.80E-01 | 8.11E-01 |
| SLC23A1     | 0.00  | 1.00E+00 | 1.00E+00 | 0.70  | 2.80E-01 | 8.11E-01 |
| LIX1L-AS1   | 1.17  | 4.77E-01 | 1.00E+00 | -0.60 | 2.81E-01 | 8.11E-01 |
| ZNF562      | 0.11  | 7.03E-01 | 1.00E+00 | 0.28  | 2.81E-01 | 8.11E-01 |
| ZNF600      | 0.10  | 7.73E-01 | 1.00E+00 | -0.42 | 2.81E-01 | 8.11E-01 |
| MEIS3       | -0.20 | 6.21E-01 | 1.00E+00 | 0.81  | 2.81E-01 | 8.11E-01 |
| SLC16A1-AS1 | 0.06  | 9.06E-01 | 1.00E+00 | 0.55  | 2.81E-01 | 8.11E-01 |
| AC018607.1  | 1.76  | 6.07E-01 | 1.00E+00 | 1.55  | 2.81E-01 | 8.11E-01 |
| COX5B       | -0.05 | 7.79E-01 | 1.00E+00 | -0.27 | 2.81E-01 | 8.12E-01 |
| XLOC_011484 | 3.06  | 9.14E-02 | 1.00E+00 | -1.49 | 2.81E-01 | 8.12E-01 |

|             |       |          |          |       |          |          |
|-------------|-------|----------|----------|-------|----------|----------|
| SOX4        | -0.12 | 6.86E-01 | 1.00E+00 | 0.32  | 2.81E-01 | 8.12E-01 |
| PURA        | 0.14  | 5.68E-01 | 1.00E+00 | -0.28 | 2.81E-01 | 8.12E-01 |
| DUSP18      | -0.49 | 1.60E-01 | 1.00E+00 | 0.32  | 2.81E-01 | 8.12E-01 |
| ZSCAN2      | -0.24 | 7.12E-01 | 1.00E+00 | 0.51  | 2.81E-01 | 8.12E-01 |
| DLEU7-AS1   | 0.38  | 9.14E-01 | 1.00E+00 | 2.19  | 2.81E-01 | 8.12E-01 |
| KCNK15-AS1  | -1.88 | 3.02E-01 | 1.00E+00 | 0.83  | 2.81E-01 | 8.12E-01 |
| E4F1        | -0.20 | 4.34E-01 | 1.00E+00 | 0.40  | 2.81E-01 | 8.12E-01 |
| THORLNC     | -1.70 | 2.66E-02 | 9.50E-01 | -0.70 | 2.81E-01 | 8.12E-01 |
| AC007686.3  | 0.68  | 4.42E-01 | 1.00E+00 | -0.73 | 2.81E-01 | 8.12E-01 |
| CDC42BPB    | -0.16 | 4.37E-01 | 1.00E+00 | 0.75  | 2.81E-01 | 8.12E-01 |
| AC106028.3  | -0.36 | 8.74E-01 | 1.00E+00 | -1.03 | 2.81E-01 | 8.12E-01 |
| AC105046.1  | -0.86 | 2.63E-01 | 1.00E+00 | -0.76 | 2.81E-01 | 8.12E-01 |
| TMEM108     | -0.14 | 7.78E-01 | 1.00E+00 | 0.56  | 2.81E-01 | 8.12E-01 |
| RNU6-238P   | 0.16  | 9.55E-01 | 1.00E+00 | 1.17  | 2.81E-01 | 8.12E-01 |
| KRT6C       | -2.79 | 8.45E-02 | 1.00E+00 | 3.37  | 2.81E-01 | 8.12E-01 |
| TRBV30      | -0.95 | 7.81E-01 | 1.00E+00 | 0.95  | 2.81E-01 | 8.12E-01 |
| ZNF454      | -0.09 | 8.87E-01 | 1.00E+00 | -0.74 | 2.81E-01 | 8.12E-01 |
| MTAP        | 0.07  | 7.81E-01 | 1.00E+00 | -0.17 | 2.82E-01 | 8.12E-01 |
| ENO4        | -1.65 | 2.17E-01 | 1.00E+00 | -0.78 | 2.82E-01 | 8.12E-01 |
| APOL6       | -0.11 | 8.57E-01 | 1.00E+00 | 0.64  | 2.82E-01 | 8.12E-01 |
| LINC00630   | -0.24 | 5.68E-01 | 1.00E+00 | 0.44  | 2.82E-01 | 8.12E-01 |
| P2RY6       | -0.11 | 8.85E-01 | 1.00E+00 | 2.58  | 2.82E-01 | 8.12E-01 |
| EBI3        | -0.33 | 6.51E-01 | 1.00E+00 | 1.14  | 2.82E-01 | 8.12E-01 |
| PLXNA4      | 0.43  | 1.76E-01 | 1.00E+00 | 0.52  | 2.82E-01 | 8.12E-01 |
| MMP9        | -0.59 | 2.77E-01 | 1.00E+00 | 0.91  | 2.82E-01 | 8.12E-01 |
| ASIC1       | -0.33 | 4.97E-01 | 1.00E+00 | 0.88  | 2.82E-01 | 8.12E-01 |
| NCDN        | -0.58 | 6.03E-02 | 1.00E+00 | 0.56  | 2.82E-01 | 8.12E-01 |
| G38513      | -0.76 | 4.99E-01 | 1.00E+00 | 1.19  | 2.82E-01 | 8.12E-01 |
| AC090197.1  | -1.22 | 6.15E-01 | 1.00E+00 | 1.54  | 2.82E-01 | 8.12E-01 |
| PALM        | 0.25  | 6.17E-01 | 1.00E+00 | 0.70  | 2.82E-01 | 8.12E-01 |
| XLOC_002196 | 1.12  | 3.86E-01 | 1.00E+00 | -0.77 | 2.82E-01 | 8.12E-01 |
| CGAS        | -0.72 | 7.16E-02 | 1.00E+00 | 0.61  | 2.82E-01 | 8.12E-01 |

|             |       |          |          |       |          |          |
|-------------|-------|----------|----------|-------|----------|----------|
| KCNAB3      | 0.05  | 9.62E-01 | 1.00E+00 | 1.73  | 2.82E-01 | 8.12E-01 |
| ARRDC1-AS1  | 0.07  | 7.77E-01 | 1.00E+00 | -0.34 | 2.82E-01 | 8.12E-01 |
| BTF3L4      | 0.22  | 3.43E-01 | 1.00E+00 | -0.23 | 2.82E-01 | 8.12E-01 |
| ZYG11B      | 0.03  | 8.92E-01 | 1.00E+00 | -0.33 | 2.82E-01 | 8.13E-01 |
| ZFP36L2     | -0.51 | 9.84E-02 | 1.00E+00 | -0.36 | 2.82E-01 | 8.13E-01 |
| TUBGCP2     | -0.40 | 2.17E-02 | 8.94E-01 | 0.28  | 2.83E-01 | 8.13E-01 |
| ARHGAP21    | -0.10 | 7.67E-01 | 1.00E+00 | 0.63  | 2.83E-01 | 8.13E-01 |
| SIK3-IT1    | 0.56  | 8.71E-01 | 1.00E+00 | -1.65 | 2.83E-01 | 8.13E-01 |
| CAMK2D      | 0.24  | 2.69E-01 | 1.00E+00 | 0.22  | 2.83E-01 | 8.13E-01 |
| UGT2B7      | -3.93 | 2.40E-02 | 9.18E-01 | -1.13 | 2.83E-01 | 8.13E-01 |
| COMMD3      | -0.03 | 9.21E-01 | 1.00E+00 | -0.58 | 2.83E-01 | 8.13E-01 |
| ORC5        | 0.34  | 1.11E-01 | 1.00E+00 | -0.37 | 2.83E-01 | 8.13E-01 |
| AC069360.1  | -1.98 | 2.16E-01 | 1.00E+00 | 0.97  | 2.83E-01 | 8.13E-01 |
| AGBL5       | -0.07 | 7.16E-01 | 1.00E+00 | -0.29 | 2.83E-01 | 8.13E-01 |
| RALGDS      | 0.29  | 5.40E-01 | 1.00E+00 | -0.33 | 2.83E-01 | 8.13E-01 |
| AKIRIN2     | 0.09  | 6.73E-01 | 1.00E+00 | 0.26  | 2.83E-01 | 8.13E-01 |
| SH3RF3-AS1  | -0.22 | 5.84E-01 | 1.00E+00 | 1.11  | 2.83E-01 | 8.13E-01 |
| AC004921.1  | -0.85 | 5.79E-01 | 1.00E+00 | 1.47  | 2.83E-01 | 8.13E-01 |
| SGPL1       | 0.23  | 4.76E-01 | 1.00E+00 | 0.28  | 2.83E-01 | 8.13E-01 |
| NKD2        | -0.04 | 9.21E-01 | 1.00E+00 | 0.79  | 2.83E-01 | 8.13E-01 |
| ELMOD1      | 0.10  | 8.93E-01 | 1.00E+00 | -0.71 | 2.83E-01 | 8.13E-01 |
| G27456      | 0.66  | 4.00E-01 | 1.00E+00 | 1.27  | 2.83E-01 | 8.13E-01 |
| AC004847.1  | -0.60 | 5.73E-01 | 1.00E+00 | 1.60  | 2.83E-01 | 8.14E-01 |
| MRPS30      | -0.24 | 2.89E-01 | 1.00E+00 | -0.26 | 2.83E-01 | 8.14E-01 |
| XLOC_001595 | 2.12  | 2.76E-01 | 1.00E+00 | -0.95 | 2.84E-01 | 8.14E-01 |
| SGPP2       | 0.09  | 8.21E-01 | 1.00E+00 | -0.79 | 2.84E-01 | 8.14E-01 |
| FAM87A      | -3.15 | 5.94E-03 | 4.59E-01 | -1.06 | 2.84E-01 | 8.14E-01 |
| AL356515.1  | 1.01  | 6.31E-01 | 1.00E+00 | 1.04  | 2.84E-01 | 8.14E-01 |
| CYGB        | 0.27  | 4.50E-01 | 1.00E+00 | 0.75  | 2.84E-01 | 8.14E-01 |
| AAAS        | -0.27 | 1.02E-01 | 1.00E+00 | -0.20 | 2.84E-01 | 8.14E-01 |
| APCDD1L     | -0.25 | 6.42E-01 | 1.00E+00 | 0.75  | 2.84E-01 | 8.14E-01 |
| TULP4       | -0.04 | 8.94E-01 | 1.00E+00 | -0.38 | 2.84E-01 | 8.14E-01 |



|                   |       |          |          |       |          |          |
|-------------------|-------|----------|----------|-------|----------|----------|
| <b>HAND2-AS1</b>  | 1.00  | 1.37E-01 | 1.00E+00 | 0.91  | 2.84E-01 | 8.14E-01 |
| <b>AL512363.1</b> | -1.52 | 3.58E-03 | 3.22E-01 | 0.66  | 2.84E-01 | 8.14E-01 |
| <b>XRCC1</b>      | 0.12  | 5.67E-01 | 1.00E+00 | 0.24  | 2.84E-01 | 8.14E-01 |
| <b>RFESD</b>      | 0.24  | 7.21E-01 | 1.00E+00 | -0.65 | 2.84E-01 | 8.14E-01 |
| <b>AC125437.2</b> | -0.94 | 7.83E-01 | 1.00E+00 | 1.41  | 2.84E-01 | 8.15E-01 |
| <b>SNAPC1</b>     | 0.28  | 3.51E-01 | 1.00E+00 | -0.34 | 2.84E-01 | 8.15E-01 |
| <b>MAPK10</b>     | 1.17  | 1.93E-01 | 1.00E+00 | -0.69 | 2.84E-01 | 8.15E-01 |
| <b>AC124067.4</b> | 0.15  | 8.69E-01 | 1.00E+00 | 1.20  | 2.84E-01 | 8.15E-01 |
| <b>PINK1</b>      | -0.01 | 9.63E-01 | 1.00E+00 | -0.69 | 2.84E-01 | 8.15E-01 |
| <b>MMADHC</b>     | 0.07  | 7.46E-01 | 1.00E+00 | -0.33 | 2.84E-01 | 8.15E-01 |
| <b>AGMAT</b>      | -2.50 | 2.19E-02 | 8.96E-01 | 0.91  | 2.84E-01 | 8.15E-01 |
| <b>WNT3</b>       | -0.11 | 7.75E-01 | 1.00E+00 | -0.71 | 2.84E-01 | 8.15E-01 |
| <b>SLC27A6</b>    | -0.96 | 6.25E-02 | 1.00E+00 | -1.16 | 2.85E-01 | 8.15E-01 |
| <b>GNAL</b>       | -0.37 | 1.65E-01 | 1.00E+00 | -0.43 | 2.85E-01 | 8.15E-01 |
| <b>ZNF132</b>     | 0.28  | 5.64E-01 | 1.00E+00 | 0.44  | 2.85E-01 | 8.15E-01 |
| <b>CALB2</b>      | 2.99  | 1.98E-02 | 8.80E-01 | -0.92 | 2.85E-01 | 8.15E-01 |
| <b>TXK</b>        | -0.71 | 4.14E-01 | 1.00E+00 | 0.78  | 2.85E-01 | 8.15E-01 |
| <b>DCD</b>        | -1.23 | 3.73E-01 | 1.00E+00 | -3.34 | 2.85E-01 | 8.15E-01 |
| <b>RRM2</b>       | 0.15  | 7.49E-01 | 1.00E+00 | 0.51  | 2.85E-01 | 8.15E-01 |
| <b>SNAPC4</b>     | -0.09 | 7.62E-01 | 1.00E+00 | 0.77  | 2.85E-01 | 8.15E-01 |
| <b>AL109936.6</b> | 0.03  | 9.79E-01 | 1.00E+00 | -1.10 | 2.85E-01 | 8.15E-01 |
| <b>UBE2QL1</b>    | -0.79 | 2.38E-01 | 1.00E+00 | -0.79 | 2.85E-01 | 8.15E-01 |
| <b>DNM1L</b>      | -0.04 | 8.30E-01 | 1.00E+00 | -0.17 | 2.85E-01 | 8.15E-01 |
| <b>FLCN</b>       | 0.33  | 2.23E-01 | 1.00E+00 | 0.59  | 2.85E-01 | 8.15E-01 |
| <b>FKRP</b>       | -0.10 | 7.60E-01 | 1.00E+00 | 0.72  | 2.85E-01 | 8.15E-01 |
| <b>G4300</b>      | -0.06 | 9.38E-01 | 1.00E+00 | -0.77 | 2.85E-01 | 8.15E-01 |
| <b>DCUN1D4</b>    | 0.22  | 3.79E-01 | 1.00E+00 | -0.34 | 2.85E-01 | 8.15E-01 |
| <b>GATM</b>       | 0.09  | 8.26E-01 | 1.00E+00 | -0.56 | 2.85E-01 | 8.15E-01 |
| <b>NAP1L6</b>     | 0.23  | 8.56E-01 | 1.00E+00 | 1.11  | 2.85E-01 | 8.15E-01 |
| <b>NECTIN2</b>    | -0.23 | 3.47E-01 | 1.00E+00 | 0.55  | 2.85E-01 | 8.15E-01 |
| <b>OR2T10</b>     | -3.99 | 8.18E-02 | 1.00E+00 | -1.81 | 2.85E-01 | 8.15E-01 |
| <b>AC010247.1</b> | -3.73 | 1.02E-01 | 1.00E+00 | 1.35  | 2.85E-01 | 8.15E-01 |

|                    |       |          |          |       |          |          |
|--------------------|-------|----------|----------|-------|----------|----------|
| <b>AL021328.1</b>  | 0.32  | 6.32E-01 | 1.00E+00 | 0.44  | 2.85E-01 | 8.15E-01 |
| <b>CACNA1F</b>     | -0.94 | 3.36E-01 | 1.00E+00 | 0.97  | 2.85E-01 | 8.15E-01 |
| <b>XLOC_010271</b> | 1.40  | 4.71E-01 | 1.00E+00 | 1.61  | 2.85E-01 | 8.15E-01 |
| <b>TSNAX</b>       | 0.19  | 5.69E-01 | 1.00E+00 | -0.29 | 2.85E-01 | 8.15E-01 |
| <b>SECISBP2L</b>   | 0.05  | 8.26E-01 | 1.00E+00 | 0.35  | 2.85E-01 | 8.15E-01 |
| <b>PLPP1</b>       | 0.20  | 6.47E-01 | 1.00E+00 | -0.42 | 2.86E-01 | 8.15E-01 |
| <b>UBR1</b>        | -0.06 | 8.55E-01 | 1.00E+00 | 0.31  | 2.86E-01 | 8.15E-01 |
| <b>E2F5</b>        | -0.06 | 9.03E-01 | 1.00E+00 | -0.43 | 2.86E-01 | 8.15E-01 |
| <b>BDP1</b>        | -0.28 | 2.71E-01 | 1.00E+00 | -0.28 | 2.86E-01 | 8.15E-01 |
| <b>CSGALNACT2</b>  | 0.02  | 9.30E-01 | 1.00E+00 | 0.44  | 2.86E-01 | 8.15E-01 |
| <b>METTL1</b>      | -0.34 | 2.91E-01 | 1.00E+00 | 0.34  | 2.86E-01 | 8.15E-01 |
| <b>Z95331.1</b>    | 1.42  | 3.85E-01 | 1.00E+00 | 0.97  | 2.86E-01 | 8.15E-01 |
| <b>CASP12</b>      | 0.71  | 1.65E-01 | 1.00E+00 | 0.76  | 2.86E-01 | 8.15E-01 |
| <b>G10695</b>      | -0.83 | 1.52E-01 | 1.00E+00 | -0.70 | 2.86E-01 | 8.16E-01 |
| <b>CYB5RL</b>      | -0.15 | 6.80E-01 | 1.00E+00 | 0.44  | 2.86E-01 | 8.16E-01 |
| <b>CCDC189</b>     | 0.60  | 8.61E-01 | 1.00E+00 | 0.90  | 2.86E-01 | 8.16E-01 |
| <b>XLOC_002002</b> | 0.82  | 5.85E-01 | 1.00E+00 | 1.58  | 2.86E-01 | 8.16E-01 |
| <b>CAMK1</b>       | 0.31  | 7.10E-01 | 1.00E+00 | -0.73 | 2.86E-01 | 8.16E-01 |
| <b>CELF4</b>       | -1.14 | 3.14E-01 | 1.00E+00 | 0.73  | 2.86E-01 | 8.16E-01 |
| <b>TUBD1</b>       | 0.32  | 3.42E-01 | 1.00E+00 | -0.35 | 2.86E-01 | 8.16E-01 |
| <b>CCIN</b>        | 0.64  | 6.99E-01 | 1.00E+00 | 1.49  | 2.86E-01 | 8.16E-01 |
| <b>PTPRN</b>       | -0.21 | 9.51E-01 | 1.00E+00 | 1.29  | 2.86E-01 | 8.16E-01 |
| <b>PLAG1</b>       | 0.22  | 5.52E-01 | 1.00E+00 | 0.41  | 2.86E-01 | 8.16E-01 |
| <b>DOK1</b>        | 1.20  | 1.20E-01 | 1.00E+00 | 0.49  | 2.87E-01 | 8.16E-01 |
| <b>SEMA4D</b>      | -0.15 | 5.81E-01 | 1.00E+00 | 0.46  | 2.87E-01 | 8.16E-01 |
| <b>DHRS12</b>      | 0.49  | 1.36E-01 | 1.00E+00 | -0.40 | 2.87E-01 | 8.16E-01 |
| <b>H2AFVP1</b>     | 1.00  | 5.22E-01 | 1.00E+00 | 0.63  | 2.87E-01 | 8.16E-01 |
| <b>MAP6</b>        | -0.72 | 2.39E-01 | 1.00E+00 | -0.70 | 2.87E-01 | 8.16E-01 |
| <b>C2orf69</b>     | -0.15 | 6.06E-01 | 1.00E+00 | -0.26 | 2.87E-01 | 8.16E-01 |
| <b>TBILA</b>       | 0.45  | 6.49E-01 | 1.00E+00 | 0.82  | 2.87E-01 | 8.16E-01 |
| <b>TRIM69</b>      | -0.04 | 9.22E-01 | 1.00E+00 | 0.34  | 2.87E-01 | 8.16E-01 |
| <b>LDHD</b>        | 0.83  | 1.57E-01 | 1.00E+00 | -0.53 | 2.87E-01 | 8.16E-01 |

|             |       |          |          |       |          |          |
|-------------|-------|----------|----------|-------|----------|----------|
| MRAP        | 1.09  | 7.45E-01 | 1.00E+00 | -1.18 | 2.87E-01 | 8.16E-01 |
| KIRREL3     | 0.34  | 6.79E-01 | 1.00E+00 | 0.73  | 2.87E-01 | 8.16E-01 |
| RUSC2       | 0.07  | 7.17E-01 | 1.00E+00 | 0.71  | 2.87E-01 | 8.16E-01 |
| PHLDB3      | 0.05  | 9.26E-01 | 1.00E+00 | 0.51  | 2.87E-01 | 8.16E-01 |
| YY1         | 0.12  | 4.45E-01 | 1.00E+00 | 0.28  | 2.87E-01 | 8.16E-01 |
| ST5         | -0.37 | 1.73E-01 | 1.00E+00 | 0.49  | 2.87E-01 | 8.16E-01 |
| DERL2       | 0.19  | 3.91E-01 | 1.00E+00 | -0.34 | 2.87E-01 | 8.16E-01 |
| AC023906.5  | 0.89  | 4.63E-01 | 1.00E+00 | 0.97  | 2.87E-01 | 8.16E-01 |
| AC007365.1  | 0.60  | 4.80E-01 | 1.00E+00 | 0.87  | 2.87E-01 | 8.16E-01 |
| TOGARAM2    | 0.54  | 3.60E-01 | 1.00E+00 | -0.89 | 2.87E-01 | 8.16E-01 |
| ZNF165      | 0.09  | 7.97E-01 | 1.00E+00 | 0.42  | 2.87E-01 | 8.16E-01 |
| C19orf24    | -0.20 | 5.42E-01 | 1.00E+00 | 0.18  | 2.87E-01 | 8.16E-01 |
| STK3        | 0.03  | 9.09E-01 | 1.00E+00 | -0.30 | 2.87E-01 | 8.16E-01 |
| TERF1       | -0.04 | 8.51E-01 | 1.00E+00 | -0.25 | 2.87E-01 | 8.16E-01 |
| ATP5MG      | 0.22  | 4.77E-01 | 1.00E+00 | -0.55 | 2.87E-01 | 8.16E-01 |
| AC004925.1  | -0.23 | 7.90E-01 | 1.00E+00 | -1.22 | 2.87E-01 | 8.16E-01 |
| XLOC_006070 | -1.09 | 5.66E-01 | 1.00E+00 | 0.70  | 2.87E-01 | 8.16E-01 |
| AC010329.1  | 0.55  | 1.74E-01 | 1.00E+00 | -0.63 | 2.87E-01 | 8.16E-01 |
| EPOP        | -1.76 | 1.32E-03 | 1.95E-01 | 1.05  | 2.87E-01 | 8.16E-01 |
| KCTD2       | 0.16  | 3.91E-01 | 1.00E+00 | 0.47  | 2.87E-01 | 8.16E-01 |
| RAD18       | -0.07 | 7.40E-01 | 1.00E+00 | 0.31  | 2.87E-01 | 8.16E-01 |
| NPDC1       | -0.05 | 8.54E-01 | 1.00E+00 | 0.42  | 2.87E-01 | 8.16E-01 |
| AL132800.1  | -1.92 | 2.06E-01 | 1.00E+00 | 0.96  | 2.87E-01 | 8.16E-01 |
| PTENP1      | 0.85  | 3.22E-01 | 1.00E+00 | 0.67  | 2.87E-01 | 8.16E-01 |
| G33960      | -1.02 | 3.43E-01 | 1.00E+00 | -0.98 | 2.87E-01 | 8.16E-01 |
| RPS3AP49    | NA    | NA       | NA       | -0.83 | 2.88E-01 | 8.16E-01 |
| HNRNPA1P10  | -0.25 | 4.25E-01 | 1.00E+00 | -0.25 | 2.88E-01 | 8.16E-01 |
| AL663070.1  | 0.72  | 4.99E-01 | 1.00E+00 | -0.98 | 2.88E-01 | 8.16E-01 |
| NDRG4       | -0.64 | 8.80E-02 | 1.00E+00 | 0.48  | 2.88E-01 | 8.16E-01 |
| FANCB       | -0.66 | 3.66E-01 | 1.00E+00 | -0.61 | 2.88E-01 | 8.16E-01 |
| ECE1        | -0.22 | 4.58E-01 | 1.00E+00 | 0.61  | 2.88E-01 | 8.16E-01 |
| OIT3        | 0.05  | 9.81E-01 | 1.00E+00 | 1.80  | 2.88E-01 | 8.16E-01 |

|                   |       |          |          |       |          |          |
|-------------------|-------|----------|----------|-------|----------|----------|
| <b>AF131215.5</b> | -0.07 | 8.15E-01 | 1.00E+00 | 0.91  | 2.88E-01 | 8.16E-01 |
| <b>RTN3P1</b>     | -1.03 | 6.83E-01 | 1.00E+00 | -0.63 | 2.88E-01 | 8.16E-01 |
| <b>PDCD5</b>      | -0.23 | 3.15E-01 | 1.00E+00 | -0.33 | 2.88E-01 | 8.16E-01 |
| <b>HNRNPA1P16</b> | -0.12 | 8.90E-01 | 1.00E+00 | 1.03  | 2.88E-01 | 8.16E-01 |
| <b>KDEL2</b>      | 0.11  | 6.13E-01 | 1.00E+00 | -0.22 | 2.88E-01 | 8.16E-01 |
| <b>SMAD4</b>      | 0.34  | 8.30E-02 | 1.00E+00 | -0.27 | 2.88E-01 | 8.16E-01 |
| <b>EMP1</b>       | 0.26  | 2.00E-01 | 1.00E+00 | 0.21  | 2.88E-01 | 8.16E-01 |
| <b>MESP2</b>      | 0.07  | 9.23E-01 | 1.00E+00 | -0.79 | 2.88E-01 | 8.16E-01 |
| <b>CYP20A1</b>    | -0.12 | 6.34E-01 | 1.00E+00 | -0.30 | 2.88E-01 | 8.16E-01 |
| <b>AL109811.2</b> | 2.38  | 4.84E-01 | 1.00E+00 | 0.91  | 2.88E-01 | 8.16E-01 |
| <b>MPLKIP</b>     | 0.02  | 9.29E-01 | 1.00E+00 | -0.40 | 2.88E-01 | 8.16E-01 |
| <b>LINC01218</b>  | -0.15 | 9.66E-01 | 1.00E+00 | -1.35 | 2.88E-01 | 8.16E-01 |
| <b>ATR1</b>       | -0.11 | 6.89E-01 | 1.00E+00 | 0.33  | 2.88E-01 | 8.16E-01 |
| <b>CYP4F8</b>     | 0.49  | 8.82E-01 | 1.00E+00 | -1.41 | 2.88E-01 | 8.16E-01 |
| <b>LRRC23</b>     | -0.26 | 3.56E-01 | 1.00E+00 | 0.23  | 2.88E-01 | 8.16E-01 |
| <b>PHB2</b>       | -0.16 | 4.84E-01 | 1.00E+00 | 0.19  | 2.88E-01 | 8.16E-01 |
| <b>SAP30BP</b>    | -0.05 | 7.48E-01 | 1.00E+00 | 0.22  | 2.88E-01 | 8.16E-01 |
| <b>WEE2-AS1</b>   | -0.76 | 1.44E-01 | 1.00E+00 | 0.69  | 2.88E-01 | 8.16E-01 |
| <b>USP14</b>      | 0.15  | 4.22E-01 | 1.00E+00 | -0.23 | 2.88E-01 | 8.16E-01 |
| <b>CHKA</b>       | -0.35 | 5.42E-01 | 1.00E+00 | -0.83 | 2.88E-01 | 8.16E-01 |
| <b>GLCE</b>       | -0.23 | 4.14E-01 | 1.00E+00 | -0.25 | 2.89E-01 | 8.16E-01 |
| <b>COA4</b>       | -0.01 | 9.75E-01 | 1.00E+00 | 0.18  | 2.89E-01 | 8.16E-01 |
| <b>RNF214</b>     | -0.16 | 4.49E-01 | 1.00E+00 | 0.26  | 2.89E-01 | 8.16E-01 |
| <b>TDRP</b>       | 0.28  | 4.25E-01 | 1.00E+00 | -0.65 | 2.89E-01 | 8.16E-01 |
| <b>AAMDC</b>      | 0.45  | 1.33E-01 | 1.00E+00 | -0.57 | 2.89E-01 | 8.16E-01 |
| <b>TAF12</b>      | 0.04  | 8.03E-01 | 1.00E+00 | -0.33 | 2.89E-01 | 8.16E-01 |
| <b>C19orf81</b>   | 0.65  | 3.20E-01 | 1.00E+00 | -1.21 | 2.89E-01 | 8.16E-01 |
| <b>VEGFD</b>      | 0.29  | 8.16E-01 | 1.00E+00 | -0.94 | 2.89E-01 | 8.16E-01 |
| <b>ABC4</b>       | -0.38 | 1.86E-01 | 1.00E+00 | 0.53  | 2.89E-01 | 8.16E-01 |
| <b>AL139424.2</b> | -0.11 | 8.76E-01 | 1.00E+00 | -1.00 | 2.89E-01 | 8.16E-01 |
| <b>MTLN</b>       | -0.04 | 8.82E-01 | 1.00E+00 | -0.37 | 2.89E-01 | 8.16E-01 |
| <b>ECH1</b>       | 0.23  | 4.32E-01 | 1.00E+00 | -0.36 | 2.89E-01 | 8.16E-01 |

|                   |       |          |          |       |          |          |
|-------------------|-------|----------|----------|-------|----------|----------|
| <b>FAM104B</b>    | -0.23 | 3.66E-01 | 1.00E+00 | -0.44 | 2.89E-01 | 8.16E-01 |
| <b>SRXN1</b>      | -1.43 | 6.26E-02 | 1.00E+00 | 0.98  | 2.89E-01 | 8.16E-01 |
| <b>CRTAP</b>      | 0.16  | 5.67E-01 | 1.00E+00 | 0.29  | 2.89E-01 | 8.16E-01 |
| <b>LPIN1</b>      | 0.38  | 3.95E-01 | 1.00E+00 | -0.50 | 2.89E-01 | 8.16E-01 |
| <b>HIC2</b>       | 0.29  | 4.75E-01 | 1.00E+00 | 0.70  | 2.89E-01 | 8.16E-01 |
| <b>RPL23</b>      | -0.06 | 8.52E-01 | 1.00E+00 | 0.27  | 2.89E-01 | 8.16E-01 |
| <b>PTPN11</b>     | 0.23  | 2.79E-01 | 1.00E+00 | -0.23 | 2.89E-01 | 8.16E-01 |
| <b>CPSF6</b>      | -0.12 | 5.38E-01 | 1.00E+00 | -0.11 | 2.89E-01 | 8.16E-01 |
| <b>TENT4B</b>     | -0.03 | 9.14E-01 | 1.00E+00 | 0.29  | 2.89E-01 | 8.16E-01 |
| <b>OSMR</b>       | -0.21 | 3.75E-01 | 1.00E+00 | 0.59  | 2.89E-01 | 8.16E-01 |
| <b>CUL7</b>       | 0.09  | 7.54E-01 | 1.00E+00 | 0.58  | 2.89E-01 | 8.16E-01 |
| <b>AL031058.1</b> | -0.35 | 5.48E-01 | 1.00E+00 | -0.66 | 2.89E-01 | 8.16E-01 |
| <b>TRIM7</b>      | 0.06  | 8.96E-01 | 1.00E+00 | -0.57 | 2.89E-01 | 8.17E-01 |
| <b>LINC00526</b>  | 0.33  | 3.58E-01 | 1.00E+00 | -0.44 | 2.90E-01 | 8.17E-01 |
| <b>AC011468.1</b> | -0.27 | 7.92E-01 | 1.00E+00 | 0.67  | 2.90E-01 | 8.17E-01 |
| <b>BAZ2B</b>      | -0.06 | 7.37E-01 | 1.00E+00 | -0.27 | 2.90E-01 | 8.17E-01 |
| <b>NOL4L</b>      | -0.13 | 7.74E-01 | 1.00E+00 | 0.40  | 2.90E-01 | 8.17E-01 |
| <b>TWSG1</b>      | 0.14  | 5.98E-01 | 1.00E+00 | 0.25  | 2.90E-01 | 8.17E-01 |
| <b>SPIN2B</b>     | 0.25  | 3.60E-01 | 1.00E+00 | -0.30 | 2.90E-01 | 8.17E-01 |
| <b>METTL24</b>    | 0.39  | 4.64E-01 | 1.00E+00 | 0.94  | 2.90E-01 | 8.17E-01 |
| <b>RPL31P2</b>    | -0.06 | 9.86E-01 | 1.00E+00 | -0.82 | 2.90E-01 | 8.17E-01 |
| <b>IL10RB</b>     | -1.28 | 1.07E-01 | 1.00E+00 | 0.55  | 2.90E-01 | 8.17E-01 |
| <b>AL121845.4</b> | -0.72 | 8.08E-01 | 1.00E+00 | -1.68 | 2.90E-01 | 8.17E-01 |
| <b>TAF13</b>      | 0.02  | 9.42E-01 | 1.00E+00 | 0.42  | 2.90E-01 | 8.17E-01 |
| <b>ACTR2</b>      | -0.02 | 8.98E-01 | 1.00E+00 | 0.20  | 2.90E-01 | 8.17E-01 |
| <b>NKX3-2</b>     | -3.43 | 3.44E-02 | 1.00E+00 | 1.50  | 2.90E-01 | 8.17E-01 |
| <b>AC004917.1</b> | 2.91  | 3.90E-01 | 1.00E+00 | 1.29  | 2.90E-01 | 8.17E-01 |
| <b>BORCS7</b>     | 0.29  | 3.52E-01 | 1.00E+00 | -0.34 | 2.90E-01 | 8.17E-01 |
| <b>GYG2</b>       | 3.32  | 1.48E-02 | 7.61E-01 | -0.90 | 2.90E-01 | 8.17E-01 |
| <b>AL451042.2</b> | 0.74  | 2.80E-01 | 1.00E+00 | 0.46  | 2.90E-01 | 8.17E-01 |
| <b>AC013264.1</b> | -0.58 | 8.68E-01 | 1.00E+00 | 1.71  | 2.90E-01 | 8.17E-01 |
| <b>SCN7A</b>      | 0.15  | 7.82E-01 | 1.00E+00 | -0.51 | 2.91E-01 | 8.18E-01 |

|                   |       |          |          |       |          |          |
|-------------------|-------|----------|----------|-------|----------|----------|
| <b>ELMOD2</b>     | 0.26  | 3.75E-01 | 1.00E+00 | -0.32 | 2.91E-01 | 8.18E-01 |
| <b>PSPHP1</b>     | -0.48 | 8.67E-01 | 1.00E+00 | 3.32  | 2.91E-01 | 8.18E-01 |
| <b>AC078777.1</b> | -0.90 | 4.43E-01 | 1.00E+00 | 0.98  | 2.91E-01 | 8.18E-01 |
| <b>AC119396.1</b> | -0.83 | 5.68E-01 | 1.00E+00 | 1.61  | 2.91E-01 | 8.18E-01 |
| <b>LINC01060</b>  | -0.75 | 7.14E-01 | 1.00E+00 | 2.24  | 2.91E-01 | 8.18E-01 |
| <b>PRKCA</b>      | -0.77 | 1.71E-02 | 8.25E-01 | 0.44  | 2.91E-01 | 8.18E-01 |
| <b>AC016907.2</b> | 2.13  | 2.17E-01 | 1.00E+00 | -1.07 | 2.91E-01 | 8.18E-01 |
| <b>GEN1</b>       | -0.19 | 5.69E-01 | 1.00E+00 | 0.51  | 2.91E-01 | 8.18E-01 |
| <b>LINC00189</b>  | -2.28 | 2.03E-01 | 1.00E+00 | -0.71 | 2.91E-01 | 8.18E-01 |
| <b>EEF1A1</b>     | 0.03  | 9.07E-01 | 1.00E+00 | 0.34  | 2.91E-01 | 8.18E-01 |
| <b>LINC00565</b>  | -1.60 | 1.76E-01 | 1.00E+00 | 1.47  | 2.91E-01 | 8.18E-01 |
| <b>AC007036.2</b> | -0.19 | 9.12E-01 | 1.00E+00 | 1.20  | 2.91E-01 | 8.18E-01 |
| <b>DNAAF4</b>     | -1.39 | 5.40E-01 | 1.00E+00 | 0.89  | 2.91E-01 | 8.18E-01 |
| <b>FAM66C</b>     | 0.13  | 7.76E-01 | 1.00E+00 | -0.73 | 2.91E-01 | 8.18E-01 |
| <b>AC068620.3</b> | 0.19  | 9.05E-01 | 1.00E+00 | -1.06 | 2.91E-01 | 8.18E-01 |
| <b>SUPT20H</b>    | 0.18  | 4.91E-01 | 1.00E+00 | 0.20  | 2.91E-01 | 8.18E-01 |
| <b>STPG4</b>      | -2.21 | 1.08E-01 | 1.00E+00 | 1.06  | 2.91E-01 | 8.18E-01 |
| <b>PARP10</b>     | -0.20 | 6.48E-01 | 1.00E+00 | 0.89  | 2.91E-01 | 8.18E-01 |
| <b>CA2</b>        | -0.14 | 8.11E-01 | 1.00E+00 | -0.46 | 2.91E-01 | 8.18E-01 |
| <b>MRPL21</b>     | 0.01  | 9.41E-01 | 1.00E+00 | -0.30 | 2.91E-01 | 8.18E-01 |
| <b>CHI3L1</b>     | -0.42 | 4.92E-01 | 1.00E+00 | 0.60  | 2.91E-01 | 8.18E-01 |
| <b>IMMP2L</b>     | -0.04 | 8.84E-01 | 1.00E+00 | -0.39 | 2.91E-01 | 8.18E-01 |
| <b>ELP6</b>       | 0.03  | 9.08E-01 | 1.00E+00 | -0.23 | 2.91E-01 | 8.18E-01 |
| <b>CLDN8</b>      | 0.19  | 5.78E-01 | 1.00E+00 | -0.65 | 2.92E-01 | 8.18E-01 |
| <b>ZFP30</b>      | 0.23  | 5.91E-01 | 1.00E+00 | -0.50 | 2.92E-01 | 8.18E-01 |
| <b>AC092287.1</b> | -1.46 | 2.33E-01 | 1.00E+00 | -0.71 | 2.92E-01 | 8.18E-01 |
| <b>MRM1</b>       | 0.52  | 1.31E-01 | 1.00E+00 | -0.50 | 2.92E-01 | 8.18E-01 |
| <b>NIM1K</b>      | -0.66 | 1.04E-01 | 1.00E+00 | 0.70  | 2.92E-01 | 8.18E-01 |
| <b>TRAV23DV6</b>  | -0.19 | 9.56E-01 | 1.00E+00 | 1.54  | 2.92E-01 | 8.19E-01 |
| <b>LINC00865</b>  | 0.39  | 6.97E-01 | 1.00E+00 | 0.91  | 2.92E-01 | 8.19E-01 |
| <b>RAD1</b>       | 0.34  | 1.18E-01 | 1.00E+00 | -0.28 | 2.92E-01 | 8.19E-01 |
| <b>ATP5PB</b>     | -0.04 | 8.25E-01 | 1.00E+00 | -0.25 | 2.92E-01 | 8.19E-01 |

|             |       |          |          |       |          |          |
|-------------|-------|----------|----------|-------|----------|----------|
| ATE1-AS1    | -0.96 | 3.59E-01 | 1.00E+00 | -1.00 | 2.92E-01 | 8.19E-01 |
| SFXN4       | -0.04 | 8.85E-01 | 1.00E+00 | -0.26 | 2.92E-01 | 8.19E-01 |
| RAP2C       | 0.02  | 9.28E-01 | 1.00E+00 | 0.21  | 2.92E-01 | 8.19E-01 |
| RCC1        | -0.53 | 4.54E-02 | 1.00E+00 | 0.37  | 2.92E-01 | 8.19E-01 |
| PI4KAP2     | 0.40  | 4.20E-01 | 1.00E+00 | 0.83  | 2.92E-01 | 8.19E-01 |
| AC055764.2  | -1.12 | 6.30E-01 | 1.00E+00 | -0.97 | 2.92E-01 | 8.19E-01 |
| TMEM205     | -0.31 | 2.54E-01 | 1.00E+00 | -0.49 | 2.92E-01 | 8.19E-01 |
| ZSCAN18     | 0.47  | 9.83E-02 | 1.00E+00 | -0.66 | 2.92E-01 | 8.19E-01 |
| DTNA        | 0.46  | 4.17E-01 | 1.00E+00 | 0.50  | 2.92E-01 | 8.19E-01 |
| PAR6G-AS1   | -0.57 | 1.39E-01 | 1.00E+00 | -0.54 | 2.92E-01 | 8.19E-01 |
| TRAC        | -0.09 | 8.71E-01 | 1.00E+00 | 0.40  | 2.92E-01 | 8.19E-01 |
| RABL2A      | -0.18 | 5.24E-01 | 1.00E+00 | -0.27 | 2.92E-01 | 8.19E-01 |
| RNF144A     | 0.21  | 5.23E-01 | 1.00E+00 | 0.53  | 2.92E-01 | 8.19E-01 |
| AC092953.2  | 1.16  | 1.36E-01 | 1.00E+00 | 0.67  | 2.92E-01 | 8.19E-01 |
| DHRS13      | -0.21 | 3.99E-01 | 1.00E+00 | -0.48 | 2.92E-01 | 8.19E-01 |
| DUSP28      | 0.01  | 9.73E-01 | 1.00E+00 | -0.33 | 2.92E-01 | 8.19E-01 |
| SLIT2       | 0.29  | 5.78E-01 | 1.00E+00 | 0.56  | 2.92E-01 | 8.19E-01 |
| AC108010.1  | -1.11 | 3.25E-02 | 1.00E+00 | 1.00  | 2.93E-01 | 8.19E-01 |
| CELF5       | -1.32 | 9.36E-02 | 1.00E+00 | 1.11  | 2.93E-01 | 8.19E-01 |
| XLOC_007686 | 0.61  | 2.66E-01 | 1.00E+00 | 1.12  | 2.93E-01 | 8.19E-01 |
| KIAA1958    | -0.34 | 3.74E-01 | 1.00E+00 | -0.41 | 2.93E-01 | 8.19E-01 |
| SSB         | -0.06 | 8.21E-01 | 1.00E+00 | -0.23 | 2.93E-01 | 8.19E-01 |
| RAB9B       | -0.11 | 8.21E-01 | 1.00E+00 | -0.56 | 2.93E-01 | 8.19E-01 |
| METAP2      | 0.05  | 7.43E-01 | 1.00E+00 | 0.17  | 2.93E-01 | 8.19E-01 |
| RPS28       | -0.11 | 6.96E-01 | 1.00E+00 | 0.40  | 2.93E-01 | 8.19E-01 |
| FTLP2       | NA    | NA       | NA       | -0.87 | 2.93E-01 | 8.19E-01 |
| TTR         | -3.99 | 6.04E-03 | 4.62E-01 | 1.08  | 2.93E-01 | 8.19E-01 |
| SERHL2      | 0.44  | 4.81E-01 | 1.00E+00 | -0.54 | 2.93E-01 | 8.19E-01 |
| TG          | -0.14 | 8.64E-01 | 1.00E+00 | -0.82 | 2.93E-01 | 8.19E-01 |
| XLOC_000972 | -0.27 | 8.04E-01 | 1.00E+00 | 1.34  | 2.93E-01 | 8.19E-01 |
| UCN         | 0.47  | 7.44E-01 | 1.00E+00 | 1.34  | 2.93E-01 | 8.19E-01 |
| PEG10       | 0.00  | 9.95E-01 | 1.00E+00 | 0.57  | 2.93E-01 | 8.19E-01 |

|                   |       |          |          |       |          |          |
|-------------------|-------|----------|----------|-------|----------|----------|
| <b>FGF12</b>      | -0.20 | 8.22E-01 | 1.00E+00 | -0.56 | 2.93E-01 | 8.19E-01 |
| <b>ACE</b>        | 0.02  | 9.69E-01 | 1.00E+00 | 0.78  | 2.93E-01 | 8.19E-01 |
| <b>MOSPD3</b>     | 0.12  | 6.98E-01 | 1.00E+00 | -0.38 | 2.93E-01 | 8.19E-01 |
| <b>GGT7</b>       | 0.13  | 5.32E-01 | 1.00E+00 | 0.42  | 2.93E-01 | 8.19E-01 |
| <b>DYNLRB1</b>    | -0.01 | 9.28E-01 | 1.00E+00 | -0.17 | 2.93E-01 | 8.19E-01 |
| <b>LINC01614</b>  | 0.90  | 7.96E-01 | 1.00E+00 | 1.96  | 2.93E-01 | 8.20E-01 |
| <b>CFAP53</b>     | -0.20 | 7.57E-01 | 1.00E+00 | 0.56  | 2.93E-01 | 8.20E-01 |
| <b>Z82206.1</b>   | -1.10 | 7.53E-01 | 1.00E+00 | -0.86 | 2.94E-01 | 8.20E-01 |
| <b>AC000124.1</b> | 0.50  | 8.32E-01 | 1.00E+00 | -2.48 | 2.94E-01 | 8.20E-01 |
| <b>ICAM1</b>      | -1.01 | 5.77E-02 | 1.00E+00 | 0.77  | 2.94E-01 | 8.20E-01 |
| <b>MAP9</b>       | 0.41  | 4.44E-01 | 1.00E+00 | 0.40  | 2.94E-01 | 8.20E-01 |
| <b>ALKBH2</b>     | -0.13 | 4.64E-01 | 1.00E+00 | -0.20 | 2.94E-01 | 8.21E-01 |
| <b>AC132872.2</b> | -1.09 | 7.06E-01 | 1.00E+00 | 1.05  | 2.94E-01 | 8.21E-01 |
| <b>AC012358.3</b> | -3.11 | 5.42E-02 | 1.00E+00 | -0.67 | 2.94E-01 | 8.21E-01 |
| <b>SYT13</b>      | -1.94 | 7.25E-02 | 1.00E+00 | 0.97  | 2.94E-01 | 8.21E-01 |
| <b>RPL17P50</b>   | 0.86  | 2.64E-01 | 1.00E+00 | 0.45  | 2.94E-01 | 8.21E-01 |
| <b>SRPRB</b>      | 0.10  | 6.46E-01 | 1.00E+00 | -0.18 | 2.94E-01 | 8.21E-01 |
| <b>G22228</b>     | 0.55  | 5.47E-01 | 1.00E+00 | 1.24  | 2.94E-01 | 8.21E-01 |
| <b>CSNK1A1</b>    | -0.14 | 6.40E-01 | 1.00E+00 | 0.22  | 2.94E-01 | 8.21E-01 |
| <b>AC090425.1</b> | -0.51 | 7.00E-01 | 1.00E+00 | -0.64 | 2.94E-01 | 8.21E-01 |
| <b>RBX1</b>       | 0.36  | 7.29E-02 | 1.00E+00 | -0.35 | 2.94E-01 | 8.21E-01 |
| <b>RMDN3</b>      | 0.11  | 6.86E-01 | 1.00E+00 | -0.23 | 2.94E-01 | 8.21E-01 |
| <b>TGFA</b>       | 0.18  | 6.83E-01 | 1.00E+00 | 0.49  | 2.95E-01 | 8.21E-01 |
| <b>TOP1</b>       | 0.10  | 5.87E-01 | 1.00E+00 | 0.38  | 2.95E-01 | 8.21E-01 |
| <b>SLC1A7</b>     | 1.00  | 7.21E-02 | 1.00E+00 | 0.77  | 2.95E-01 | 8.21E-01 |
| <b>DNAAF1</b>     | -1.14 | 3.34E-01 | 1.00E+00 | -1.16 | 2.95E-01 | 8.21E-01 |
| <b>C21orf62</b>   | -1.63 | 4.03E-01 | 1.00E+00 | -1.44 | 2.95E-01 | 8.21E-01 |
| <b>AL353194.1</b> | 0.84  | 2.92E-01 | 1.00E+00 | -0.53 | 2.95E-01 | 8.21E-01 |
| <b>C12orf65</b>   | 0.15  | 5.17E-01 | 1.00E+00 | -0.21 | 2.95E-01 | 8.21E-01 |
| <b>ATP8B3</b>     | 0.37  | 5.86E-01 | 1.00E+00 | 0.89  | 2.95E-01 | 8.21E-01 |
| <b>LYPD3</b>      | -0.32 | 5.47E-01 | 1.00E+00 | 0.62  | 2.95E-01 | 8.21E-01 |
| <b>ZNF462</b>     | -0.05 | 8.59E-01 | 1.00E+00 | 0.33  | 2.95E-01 | 8.21E-01 |



|               |       |          |          |       |          |          |
|---------------|-------|----------|----------|-------|----------|----------|
| GABRA4        | -1.95 | 1.34E-01 | 1.00E+00 | -2.94 | 2.95E-01 | 8.21E-01 |
| CCDC34        | -0.04 | 8.51E-01 | 1.00E+00 | -0.29 | 2.95E-01 | 8.21E-01 |
| TMSB4XP2      | NA    | NA       | NA       | -0.78 | 2.95E-01 | 8.21E-01 |
| CCDC150       | 0.73  | 4.43E-01 | 1.00E+00 | 0.68  | 2.95E-01 | 8.21E-01 |
| ARHGAP25      | 0.17  | 6.46E-01 | 1.00E+00 | 0.63  | 2.95E-01 | 8.21E-01 |
| ZNF354B       | -0.32 | 3.37E-01 | 1.00E+00 | -0.37 | 2.95E-01 | 8.21E-01 |
| DNAJC27       | 0.26  | 4.78E-01 | 1.00E+00 | -0.29 | 2.95E-01 | 8.21E-01 |
| TLE1P1        | 0.83  | 6.25E-01 | 1.00E+00 | -0.70 | 2.95E-01 | 8.21E-01 |
| ZNF252P-AS1   | 2.60  | 1.53E-01 | 1.00E+00 | 1.26  | 2.95E-01 | 8.21E-01 |
| SLC43A1       | -0.02 | 9.60E-01 | 1.00E+00 | 0.41  | 2.95E-01 | 8.21E-01 |
| CKAP4         | -0.02 | 9.15E-01 | 1.00E+00 | 0.50  | 2.95E-01 | 8.21E-01 |
| AC079467.1    | 0.97  | 2.98E-01 | 1.00E+00 | 1.55  | 2.95E-01 | 8.21E-01 |
| VPS33A        | 0.05  | 8.32E-01 | 1.00E+00 | 0.21  | 2.95E-01 | 8.21E-01 |
| RPL41         | 0.08  | 7.71E-01 | 1.00E+00 | 0.34  | 2.95E-01 | 8.21E-01 |
| DHRS7B        | -0.15 | 4.18E-01 | 1.00E+00 | -0.29 | 2.95E-01 | 8.21E-01 |
| FNDC10        | -0.36 | 2.57E-01 | 1.00E+00 | -0.66 | 2.95E-01 | 8.21E-01 |
| ABHD17AP6     | -1.33 | 4.43E-01 | 1.00E+00 | -1.16 | 2.96E-01 | 8.21E-01 |
| CSRP2         | 0.21  | 4.93E-01 | 1.00E+00 | 0.39  | 2.96E-01 | 8.21E-01 |
| ADAM1B        | 1.42  | 1.29E-01 | 1.00E+00 | -1.35 | 2.96E-01 | 8.21E-01 |
| AP001434.1    | 0.44  | 8.99E-01 | 1.00E+00 | 1.60  | 2.96E-01 | 8.21E-01 |
| SNX25         | 0.09  | 8.10E-01 | 1.00E+00 | -0.53 | 2.96E-01 | 8.21E-01 |
| EIF4EBP2      | 0.39  | 3.44E-02 | 1.00E+00 | -0.25 | 2.96E-01 | 8.21E-01 |
| RP11-566K19.6 | -0.39 | 8.29E-01 | 1.00E+00 | -1.11 | 2.96E-01 | 8.21E-01 |
| AFMID         | -0.30 | 1.60E-01 | 1.00E+00 | 0.25  | 2.96E-01 | 8.21E-01 |
| GYG1          | -0.25 | 1.90E-01 | 1.00E+00 | 0.20  | 2.96E-01 | 8.21E-01 |
| ARMCX4        | -0.15 | 6.03E-01 | 1.00E+00 | 0.50  | 2.96E-01 | 8.21E-01 |
| AL139128.1    | 30.00 | 6.57E-18 | 5.54E-15 | 1.57  | 2.96E-01 | 8.21E-01 |
| RP6-42F4.1    | 0.19  | 6.73E-01 | 1.00E+00 | -0.37 | 2.96E-01 | 8.21E-01 |
| BBOX1-AS1     | 0.93  | 5.19E-01 | 1.00E+00 | 0.67  | 2.96E-01 | 8.21E-01 |
| XLOC_003471   | -0.18 | 7.42E-01 | 1.00E+00 | -0.54 | 2.96E-01 | 8.22E-01 |
| DNAH7         | -0.69 | 3.86E-01 | 1.00E+00 | -0.97 | 2.96E-01 | 8.22E-01 |
| AAR2          | -0.03 | 9.02E-01 | 1.00E+00 | 0.16  | 2.96E-01 | 8.22E-01 |

|                     |       |          |          |       |          |          |
|---------------------|-------|----------|----------|-------|----------|----------|
| <b>FLJ37453</b>     | -0.07 | 7.86E-01 | 1.00E+00 | -0.34 | 2.96E-01 | 8.22E-01 |
| <b>TRIM16</b>       | -0.22 | 4.39E-01 | 1.00E+00 | 0.25  | 2.96E-01 | 8.22E-01 |
| <b>ZNF335</b>       | -0.33 | 2.32E-01 | 1.00E+00 | 0.50  | 2.96E-01 | 8.22E-01 |
| <b>LMX1B</b>        | -0.39 | 4.11E-01 | 1.00E+00 | 0.72  | 2.96E-01 | 8.22E-01 |
| <b>ZNF572</b>       | 0.05  | 9.49E-01 | 1.00E+00 | -0.95 | 2.96E-01 | 8.22E-01 |
| <b>AC024560.2</b>   | -1.63 | 2.16E-01 | 1.00E+00 | -1.45 | 2.96E-01 | 8.22E-01 |
| <b>RELA</b>         | -0.23 | 2.30E-01 | 1.00E+00 | 0.30  | 2.96E-01 | 8.22E-01 |
| <b>GPX1</b>         | 0.29  | 5.14E-01 | 1.00E+00 | 0.41  | 2.96E-01 | 8.22E-01 |
| <b>ZNF614</b>       | -0.01 | 9.56E-01 | 1.00E+00 | -0.21 | 2.96E-01 | 8.22E-01 |
| <b>STMP1</b>        | 0.21  | 2.30E-01 | 1.00E+00 | -0.35 | 2.97E-01 | 8.22E-01 |
| <b>ZNF788</b>       | 0.54  | 2.16E-01 | 1.00E+00 | -0.57 | 2.97E-01 | 8.22E-01 |
| <b>RPL12</b>        | -0.22 | 4.41E-01 | 1.00E+00 | 0.28  | 2.97E-01 | 8.22E-01 |
| <b>SYMPK</b>        | -0.35 | 1.37E-01 | 1.00E+00 | 0.68  | 2.97E-01 | 8.22E-01 |
| <b>AC012313.4</b>   | 0.79  | 3.63E-01 | 1.00E+00 | -0.87 | 2.97E-01 | 8.22E-01 |
| <b>NRSN2-AS1</b>    | -0.29 | 3.76E-01 | 1.00E+00 | -0.35 | 2.97E-01 | 8.22E-01 |
| <b>HEMGN</b>        | 0.56  | 8.71E-01 | 1.00E+00 | -1.66 | 2.97E-01 | 8.22E-01 |
| <b>NUDT15</b>       | 0.05  | 8.53E-01 | 1.00E+00 | -0.21 | 2.97E-01 | 8.22E-01 |
| <b>ADI1</b>         | 0.06  | 7.98E-01 | 1.00E+00 | -0.31 | 2.97E-01 | 8.22E-01 |
| <b>PCNP</b>         | 0.01  | 9.49E-01 | 1.00E+00 | -0.26 | 2.97E-01 | 8.22E-01 |
| <b>GAS1RR</b>       | -0.23 | 6.18E-01 | 1.00E+00 | -0.37 | 2.97E-01 | 8.22E-01 |
| <b>KAT2B</b>        | 0.20  | 3.58E-01 | 1.00E+00 | 0.32  | 2.97E-01 | 8.22E-01 |
| <b>SLC25A37</b>     | -0.04 | 8.92E-01 | 1.00E+00 | 0.28  | 2.97E-01 | 8.22E-01 |
| <b>GOLGA7</b>       | 0.20  | 3.67E-01 | 1.00E+00 | -0.34 | 2.97E-01 | 8.22E-01 |
| <b>RP6-206I17.1</b> | -0.18 | 6.80E-01 | 1.00E+00 | 0.29  | 2.97E-01 | 8.22E-01 |
| <b>KIT</b>          | 0.45  | 3.97E-01 | 1.00E+00 | -0.43 | 2.97E-01 | 8.22E-01 |
| <b>SERBP1</b>       | -0.09 | 6.86E-01 | 1.00E+00 | 0.16  | 2.97E-01 | 8.22E-01 |
| <b>MAP1A</b>        | -0.18 | 7.59E-01 | 1.00E+00 | 0.56  | 2.97E-01 | 8.22E-01 |
| <b>S100A10</b>      | 0.10  | 6.54E-01 | 1.00E+00 | -0.25 | 2.97E-01 | 8.22E-01 |
| <b>NPHP1</b>        | -0.14 | 6.95E-01 | 1.00E+00 | -0.37 | 2.97E-01 | 8.22E-01 |
| <b>CHCHD2P6</b>     | 0.82  | 1.69E-01 | 1.00E+00 | 0.60  | 2.97E-01 | 8.22E-01 |
| <b>RNF149</b>       | 0.00  | 9.91E-01 | 1.00E+00 | 0.24  | 2.97E-01 | 8.22E-01 |
| <b>AC002401.4</b>   | NA    | NA       | NA       | 1.49  | 2.97E-01 | 8.22E-01 |

|                   |       |          |          |       |          |          |
|-------------------|-------|----------|----------|-------|----------|----------|
| <b>CCDC12</b>     | -0.06 | 8.16E-01 | 1.00E+00 | 0.26  | 2.97E-01 | 8.22E-01 |
| <b>AL136979.1</b> | 0.97  | 3.81E-01 | 1.00E+00 | 1.15  | 2.97E-01 | 8.22E-01 |
| <b>NBAT1</b>      | -1.38 | 6.12E-01 | 1.00E+00 | 1.31  | 2.97E-01 | 8.22E-01 |
| <b>TNFAIP8</b>    | 0.34  | 2.81E-01 | 1.00E+00 | -0.28 | 2.97E-01 | 8.22E-01 |
| <b>AC026691.1</b> | 0.35  | 5.49E-01 | 1.00E+00 | 0.92  | 2.97E-01 | 8.22E-01 |
| <b>G27759</b>     | -1.69 | 6.99E-03 | 5.09E-01 | 0.67  | 2.98E-01 | 8.22E-01 |
| <b>SIGLEC22P</b>  | 0.38  | 7.88E-01 | 1.00E+00 | 1.42  | 2.98E-01 | 8.22E-01 |
| <b>FBXL12</b>     | -0.02 | 9.39E-01 | 1.00E+00 | 0.24  | 2.98E-01 | 8.22E-01 |
| <b>AL590627.1</b> | -1.86 | 4.71E-01 | 1.00E+00 | -1.04 | 2.98E-01 | 8.22E-01 |
| <b>POLR2B</b>     | 0.20  | 3.51E-01 | 1.00E+00 | 0.17  | 2.98E-01 | 8.22E-01 |
| <b>AF213884.3</b> | -2.87 | 2.65E-02 | 9.49E-01 | 0.94  | 2.98E-01 | 8.22E-01 |
| <b>AL139174.1</b> | 3.43  | 3.09E-01 | 1.00E+00 | -1.14 | 2.98E-01 | 8.22E-01 |
| <b>ZNF510</b>     | 0.29  | 4.23E-01 | 1.00E+00 | 0.38  | 2.98E-01 | 8.22E-01 |
| <b>ABCC10</b>     | 0.01  | 9.65E-01 | 1.00E+00 | 0.61  | 2.98E-01 | 8.22E-01 |
| <b>AC005237.1</b> | 0.88  | 3.27E-01 | 1.00E+00 | -1.24 | 2.98E-01 | 8.22E-01 |
| <b>LINC01534</b>  | -0.07 | 9.30E-01 | 1.00E+00 | -0.71 | 2.98E-01 | 8.22E-01 |
| <b>DRP2</b>       | -0.21 | 8.32E-01 | 1.00E+00 | -1.55 | 2.98E-01 | 8.22E-01 |
| <b>FBLN2</b>      | 0.57  | 2.31E-01 | 1.00E+00 | 0.64  | 2.98E-01 | 8.22E-01 |
| <b>RPL10</b>      | -0.13 | 6.12E-01 | 1.00E+00 | 0.24  | 2.98E-01 | 8.22E-01 |
| <b>RPL31P11</b>   | 0.43  | 9.03E-01 | 1.00E+00 | -1.05 | 2.98E-01 | 8.22E-01 |
| <b>RHOA</b>       | 0.07  | 7.19E-01 | 1.00E+00 | -0.21 | 2.98E-01 | 8.22E-01 |
| <b>KAT6B</b>      | -0.05 | 8.46E-01 | 1.00E+00 | -0.25 | 2.98E-01 | 8.22E-01 |
| <b>MRPL34</b>     | -0.13 | 4.39E-01 | 1.00E+00 | -0.27 | 2.98E-01 | 8.22E-01 |
| <b>ALG11</b>      | -0.03 | 9.06E-01 | 1.00E+00 | -0.27 | 2.98E-01 | 8.22E-01 |
| <b>CNN2</b>       | -0.18 | 3.06E-01 | 1.00E+00 | 0.33  | 2.98E-01 | 8.22E-01 |
| <b>GSDMA</b>      | -0.09 | 8.92E-01 | 1.00E+00 | 0.57  | 2.98E-01 | 8.22E-01 |
| <b>STAM2</b>      | -0.02 | 9.39E-01 | 1.00E+00 | -0.15 | 2.98E-01 | 8.22E-01 |
| <b>SELENOM</b>    | -0.10 | 7.97E-01 | 1.00E+00 | 0.35  | 2.98E-01 | 8.22E-01 |
| <b>AC011498.1</b> | 0.91  | 4.93E-01 | 1.00E+00 | -1.03 | 2.98E-01 | 8.22E-01 |
| <b>ZNF503-AS2</b> | -0.24 | 5.67E-01 | 1.00E+00 | 0.42  | 2.98E-01 | 8.22E-01 |
| <b>HSD17B1P1</b>  | -0.45 | 3.78E-01 | 1.00E+00 | 1.16  | 2.98E-01 | 8.22E-01 |
| <b>AXIN1</b>      | -0.26 | 3.34E-01 | 1.00E+00 | 0.58  | 2.98E-01 | 8.22E-01 |

|                    |       |          |          |       |          |          |
|--------------------|-------|----------|----------|-------|----------|----------|
| <b>RHEB</b>        | 0.27  | 1.54E-01 | 1.00E+00 | -0.28 | 2.98E-01 | 8.22E-01 |
| <b>MTF1</b>        | 0.15  | 5.17E-01 | 1.00E+00 | 0.20  | 2.99E-01 | 8.22E-01 |
| <b>GABARAP</b>     | -3.12 | 1.60E-01 | 1.00E+00 | 0.61  | 2.99E-01 | 8.22E-01 |
| <b>NAIP</b>        | -0.38 | 4.94E-01 | 1.00E+00 | 0.93  | 2.99E-01 | 8.22E-01 |
| <b>AP000688.1</b>  | 0.34  | 7.25E-01 | 1.00E+00 | -0.72 | 2.99E-01 | 8.22E-01 |
| <b>CCNG2</b>       | 0.59  | 6.65E-02 | 1.00E+00 | -0.43 | 2.99E-01 | 8.22E-01 |
| <b>AC116667.2</b>  | 1.09  | 6.29E-01 | 1.00E+00 | 1.57  | 2.99E-01 | 8.22E-01 |
| <b>HLA-DOB</b>     | -0.66 | 1.42E-01 | 1.00E+00 | 0.53  | 2.99E-01 | 8.22E-01 |
| <b>CCDC162P</b>    | 1.23  | 2.92E-01 | 1.00E+00 | -0.84 | 2.99E-01 | 8.22E-01 |
| <b>CCDC87</b>      | -0.58 | 5.94E-01 | 1.00E+00 | -1.35 | 2.99E-01 | 8.22E-01 |
| <b>ZNF530</b>      | 0.39  | 1.42E-01 | 1.00E+00 | -0.31 | 2.99E-01 | 8.22E-01 |
| <b>SEMA5A</b>      | -0.04 | 9.16E-01 | 1.00E+00 | 0.32  | 2.99E-01 | 8.22E-01 |
| <b>HGSNAT</b>      | 0.09  | 7.50E-01 | 1.00E+00 | -0.30 | 2.99E-01 | 8.22E-01 |
| <b>AC254633.1</b>  | 0.44  | 4.65E-01 | 1.00E+00 | 0.81  | 2.99E-01 | 8.22E-01 |
| <b>Metazoa_SRP</b> | -3.37 | 1.08E-01 | 1.00E+00 | -1.12 | 2.99E-01 | 8.22E-01 |
| <b>UBP1</b>        | 0.06  | 7.84E-01 | 1.00E+00 | 0.45  | 2.99E-01 | 8.22E-01 |
| <b>RHEBL1</b>      | 0.46  | 1.28E-01 | 1.00E+00 | 0.46  | 2.99E-01 | 8.22E-01 |
| <b>HCFC1</b>       | -0.39 | 1.55E-01 | 1.00E+00 | 0.57  | 2.99E-01 | 8.22E-01 |
| <b>FRS2</b>        | -0.15 | 4.51E-01 | 1.00E+00 | 0.17  | 2.99E-01 | 8.22E-01 |
| <b>LRRC40</b>      | 0.24  | 3.90E-01 | 1.00E+00 | -0.26 | 2.99E-01 | 8.22E-01 |
| <b>NPM1P6</b>      | 0.05  | 9.60E-01 | 1.00E+00 | -0.50 | 2.99E-01 | 8.22E-01 |
| <b>ARV1</b>        | -0.13 | 5.55E-01 | 1.00E+00 | -0.36 | 2.99E-01 | 8.22E-01 |
| <b>AC041040.1</b>  | 0.85  | 4.44E-01 | 1.00E+00 | 1.50  | 2.99E-01 | 8.22E-01 |
| <b>RNU7-163P</b>   | 0.12  | 9.71E-01 | 1.00E+00 | 1.12  | 2.99E-01 | 8.22E-01 |
| <b>AC005520.2</b>  | 0.61  | 5.98E-02 | 1.00E+00 | -0.60 | 2.99E-01 | 8.22E-01 |
| <b>G25680</b>      | -1.69 | 3.42E-01 | 1.00E+00 | 1.22  | 2.99E-01 | 8.22E-01 |
| <b>AC037459.2</b>  | 0.29  | 5.90E-01 | 1.00E+00 | -0.67 | 2.99E-01 | 8.22E-01 |
| <b>XPO4</b>        | -0.07 | 7.79E-01 | 1.00E+00 | -0.30 | 2.99E-01 | 8.22E-01 |
| <b>SLC6A11</b>     | -0.51 | 2.82E-01 | 1.00E+00 | 0.65  | 2.99E-01 | 8.22E-01 |
| <b>FKBP9</b>       | 0.23  | 4.28E-01 | 1.00E+00 | 0.31  | 2.99E-01 | 8.22E-01 |
| <b>HIST4H4</b>     | 0.01  | 9.83E-01 | 1.00E+00 | 0.53  | 3.00E-01 | 8.22E-01 |
| <b>ATP5PD</b>      | 0.13  | 5.07E-01 | 1.00E+00 | -0.37 | 3.00E-01 | 8.22E-01 |

|                      |       |          |          |       |          |          |
|----------------------|-------|----------|----------|-------|----------|----------|
| <b>AL160313.1</b>    | -0.44 | 6.64E-01 | 1.00E+00 | -0.61 | 3.00E-01 | 8.22E-01 |
| <b>ELMO3</b>         | -0.37 | 3.05E-01 | 1.00E+00 | 0.46  | 3.00E-01 | 8.22E-01 |
| <b>FBXW4</b>         | 0.03  | 8.90E-01 | 1.00E+00 | 0.48  | 3.00E-01 | 8.22E-01 |
| <b>GCC2-AS1</b>      | -1.48 | 1.77E-01 | 1.00E+00 | 0.51  | 3.00E-01 | 8.22E-01 |
| <b>VAPA</b>          | 0.06  | 7.54E-01 | 1.00E+00 | -0.29 | 3.00E-01 | 8.22E-01 |
| <b>CFAP58-DT</b>     | -0.41 | 3.88E-01 | 1.00E+00 | -0.51 | 3.00E-01 | 8.22E-01 |
| <b>RN7SL749P</b>     | 0.36  | 9.17E-01 | 1.00E+00 | 1.26  | 3.00E-01 | 8.22E-01 |
| <b>SLC39A13</b>      | -0.07 | 7.84E-01 | 1.00E+00 | 0.32  | 3.00E-01 | 8.22E-01 |
| <b>AC112236.2</b>    | -0.02 | 9.84E-01 | 1.00E+00 | 0.78  | 3.00E-01 | 8.22E-01 |
| <b>ZNF813</b>        | 0.32  | 2.06E-01 | 1.00E+00 | 0.34  | 3.00E-01 | 8.22E-01 |
| <b>PSMC1P1</b>       | -0.01 | 9.87E-01 | 1.00E+00 | -0.31 | 3.00E-01 | 8.22E-01 |
| <b>ARMC12</b>        | 0.80  | 4.80E-01 | 1.00E+00 | 1.13  | 3.00E-01 | 8.22E-01 |
| <b>GDF3</b>          | -3.47 | 1.73E-01 | 1.00E+00 | 1.40  | 3.00E-01 | 8.22E-01 |
| <b>PDZD4</b>         | -0.80 | 3.93E-02 | 1.00E+00 | 0.80  | 3.00E-01 | 8.22E-01 |
| <b>CTD-3222D19.7</b> | -0.48 | 6.60E-01 | 1.00E+00 | 0.80  | 3.00E-01 | 8.22E-01 |
| <b>PCDHGA6</b>       | -0.14 | 6.71E-01 | 1.00E+00 | -0.43 | 3.00E-01 | 8.22E-01 |
| <b>TMEM74</b>        | 0.05  | 9.34E-01 | 1.00E+00 | -0.58 | 3.00E-01 | 8.22E-01 |
| <b>ZIC2</b>          | -0.92 | 2.43E-01 | 1.00E+00 | 1.23  | 3.00E-01 | 8.22E-01 |
| <b>MCU</b>           | 0.26  | 4.45E-01 | 1.00E+00 | -0.26 | 3.00E-01 | 8.22E-01 |
| <b>CLSTN2</b>        | 0.23  | 6.74E-01 | 1.00E+00 | -0.69 | 3.00E-01 | 8.22E-01 |
| <b>AL391834.1</b>    | -0.14 | 9.33E-01 | 1.00E+00 | 0.84  | 3.00E-01 | 8.22E-01 |
| <b>PAQR5</b>         | -0.08 | 7.38E-01 | 1.00E+00 | 0.40  | 3.00E-01 | 8.22E-01 |
| <b>ETFDH</b>         | 0.27  | 2.02E-01 | 1.00E+00 | -0.29 | 3.00E-01 | 8.22E-01 |
| <b>EDNRA</b>         | 0.09  | 8.35E-01 | 1.00E+00 | 0.40  | 3.00E-01 | 8.22E-01 |
| <b>AGAP4</b>         | 0.11  | 9.19E-01 | 1.00E+00 | -0.65 | 3.01E-01 | 8.22E-01 |
| <b>NDUFA6-DT</b>     | 0.22  | 5.57E-01 | 1.00E+00 | 0.52  | 3.01E-01 | 8.22E-01 |
| <b>NEDD4</b>         | 0.33  | 2.72E-01 | 1.00E+00 | 0.31  | 3.01E-01 | 8.22E-01 |
| <b>PIAS4</b>         | -0.03 | 8.93E-01 | 1.00E+00 | 0.36  | 3.01E-01 | 8.22E-01 |
| <b>RGS22</b>         | 0.60  | 1.19E-01 | 1.00E+00 | -0.76 | 3.01E-01 | 8.22E-01 |
| <b>TTC21A</b>        | -0.66 | 3.99E-01 | 1.00E+00 | 0.75  | 3.01E-01 | 8.22E-01 |
| <b>TBC1D1</b>        | -0.06 | 8.70E-01 | 1.00E+00 | 0.56  | 3.01E-01 | 8.23E-01 |
| <b>PSMA5</b>         | -0.03 | 8.47E-01 | 1.00E+00 | 0.18  | 3.01E-01 | 8.23E-01 |

|                    |       |          |          |       |          |          |
|--------------------|-------|----------|----------|-------|----------|----------|
| <b>AC005839.1</b>  | 0.58  | 3.74E-01 | 1.00E+00 | 0.52  | 3.01E-01 | 8.23E-01 |
| <b>SH3BGRL3</b>    | -0.28 | 3.11E-01 | 1.00E+00 | 0.30  | 3.01E-01 | 8.23E-01 |
| <b>ZNF131</b>      | -0.10 | 5.67E-01 | 1.00E+00 | -0.18 | 3.01E-01 | 8.23E-01 |
| <b>VTI1A</b>       | -0.08 | 6.02E-01 | 1.00E+00 | -0.17 | 3.01E-01 | 8.23E-01 |
| <b>AC009831.1</b>  | 0.32  | 7.18E-01 | 1.00E+00 | 0.67  | 3.01E-01 | 8.23E-01 |
| <b>MCMBP</b>       | -0.13 | 5.79E-01 | 1.00E+00 | -0.47 | 3.01E-01 | 8.23E-01 |
| <b>AC092168.2</b>  | -2.06 | 4.77E-01 | 1.00E+00 | 1.99  | 3.01E-01 | 8.23E-01 |
| <b>AC104438.1</b>  | 0.90  | 7.01E-01 | 1.00E+00 | -1.20 | 3.01E-01 | 8.23E-01 |
| <b>LMBR1L</b>      | 0.14  | 6.91E-01 | 1.00E+00 | 0.32  | 3.01E-01 | 8.23E-01 |
| <b>AL354811.1</b>  | 0.44  | 8.99E-01 | 1.00E+00 | 1.10  | 3.01E-01 | 8.23E-01 |
| <b>BSDC1</b>       | 0.00  | 9.90E-01 | 1.00E+00 | 0.22  | 3.01E-01 | 8.23E-01 |
| <b>OR7E7P</b>      | 0.37  | 7.24E-01 | 1.00E+00 | -1.20 | 3.01E-01 | 8.23E-01 |
| <b>FAM86GP</b>     | 0.38  | 6.62E-01 | 1.00E+00 | 0.86  | 3.01E-01 | 8.23E-01 |
| <b>PSME2P2</b>     | 0.56  | 8.71E-01 | 1.00E+00 | 0.72  | 3.01E-01 | 8.23E-01 |
| <b>MAPRE3</b>      | 0.14  | 6.37E-01 | 1.00E+00 | -0.27 | 3.01E-01 | 8.23E-01 |
| <b>ZSWIM3</b>      | 0.63  | 1.52E-01 | 1.00E+00 | 0.55  | 3.01E-01 | 8.23E-01 |
| <b>RBM25</b>       | -0.03 | 8.72E-01 | 1.00E+00 | 0.23  | 3.01E-01 | 8.23E-01 |
| <b>AC015912.3</b>  | -0.13 | 8.94E-01 | 1.00E+00 | 0.50  | 3.01E-01 | 8.23E-01 |
| <b>FAM189B</b>     | -0.27 | 3.05E-01 | 1.00E+00 | 0.69  | 3.02E-01 | 8.23E-01 |
| <b>ANKRD49</b>     | 0.04  | 8.35E-01 | 1.00E+00 | -0.40 | 3.02E-01 | 8.23E-01 |
| <b>AC009686.1</b>  | 0.56  | 8.71E-01 | 1.00E+00 | 1.21  | 3.02E-01 | 8.23E-01 |
| <b>MRGPRX3</b>     | -0.18 | 9.37E-01 | 1.00E+00 | 2.11  | 3.02E-01 | 8.23E-01 |
| <b>AC135983.3</b>  | 0.63  | 8.23E-01 | 1.00E+00 | 1.00  | 3.02E-01 | 8.23E-01 |
| <b>MED17</b>       | 0.50  | 2.77E-01 | 1.00E+00 | 0.36  | 3.02E-01 | 8.23E-01 |
| <b>PCED1B</b>      | -0.26 | 5.80E-01 | 1.00E+00 | 0.48  | 3.02E-01 | 8.23E-01 |
| <b>FRG1JP</b>      | 0.03  | 9.47E-01 | 1.00E+00 | -0.33 | 3.02E-01 | 8.23E-01 |
| <b>CNTF</b>        | -0.76 | 3.28E-01 | 1.00E+00 | 0.74  | 3.02E-01 | 8.23E-01 |
| <b>XLOC_002554</b> | 0.02  | 9.65E-01 | 1.00E+00 | 0.81  | 3.02E-01 | 8.23E-01 |
| <b>AL135905.1</b>  | 0.38  | 5.85E-01 | 1.00E+00 | -0.75 | 3.02E-01 | 8.23E-01 |
| <b>AL157827.2</b>  | -1.31 | 2.72E-01 | 1.00E+00 | 1.04  | 3.02E-01 | 8.23E-01 |
| <b>PANO1</b>       | 0.63  | 5.02E-01 | 1.00E+00 | 1.14  | 3.02E-01 | 8.23E-01 |
| <b>AP1B1</b>       | -0.09 | 7.15E-01 | 1.00E+00 | 0.44  | 3.02E-01 | 8.23E-01 |

|            |       |          |          |       |          |          |
|------------|-------|----------|----------|-------|----------|----------|
| WASH5P     | 0.04  | 9.64E-01 | 1.00E+00 | 0.48  | 3.02E-01 | 8.23E-01 |
| ZFAND4     | -0.06 | 8.74E-01 | 1.00E+00 | -0.45 | 3.02E-01 | 8.23E-01 |
| PCDHGB8P   | -1.73 | 2.73E-01 | 1.00E+00 | -1.22 | 3.02E-01 | 8.23E-01 |
| GIMAP4     | 0.46  | 4.17E-01 | 1.00E+00 | 0.45  | 3.02E-01 | 8.23E-01 |
| SLED1      | 0.98  | 1.88E-01 | 1.00E+00 | 0.98  | 3.02E-01 | 8.23E-01 |
| LINC02289  | 0.01  | 9.94E-01 | 1.00E+00 | -0.81 | 3.02E-01 | 8.23E-01 |
| GRIN2C     | -0.33 | 6.42E-01 | 1.00E+00 | 0.83  | 3.02E-01 | 8.23E-01 |
| C12orf45   | 0.08  | 7.24E-01 | 1.00E+00 | -0.36 | 3.02E-01 | 8.23E-01 |
| EIF4G2     | -0.07 | 7.67E-01 | 1.00E+00 | 0.19  | 3.02E-01 | 8.23E-01 |
| AP003548.1 | 2.02  | 1.78E-01 | 1.00E+00 | -0.84 | 3.02E-01 | 8.23E-01 |
| GIMAP8     | 0.59  | 2.12E-01 | 1.00E+00 | 0.54  | 3.02E-01 | 8.23E-01 |
| AL590617.1 | -1.25 | 7.16E-01 | 1.00E+00 | -1.78 | 3.02E-01 | 8.23E-01 |
| C20orf96   | -0.27 | 5.57E-01 | 1.00E+00 | 0.35  | 3.02E-01 | 8.23E-01 |
| EGFL6      | 0.89  | 4.65E-01 | 1.00E+00 | 0.79  | 3.02E-01 | 8.23E-01 |
| PRR16      | 0.67  | 2.91E-01 | 1.00E+00 | 0.70  | 3.03E-01 | 8.23E-01 |
| LINC01270  | -1.32 | 4.75E-01 | 1.00E+00 | -1.11 | 3.03E-01 | 8.23E-01 |
| RSF1       | 0.06  | 7.20E-01 | 1.00E+00 | 0.20  | 3.03E-01 | 8.23E-01 |
| C12orf10   | -0.17 | 4.77E-01 | 1.00E+00 | 0.25  | 3.03E-01 | 8.23E-01 |
| PELP1      | -0.05 | 7.86E-01 | 1.00E+00 | 0.53  | 3.03E-01 | 8.23E-01 |
| MAF        | -0.19 | 6.23E-01 | 1.00E+00 | 0.35  | 3.03E-01 | 8.23E-01 |
| AC233723.1 | -1.92 | 2.08E-02 | 8.94E-01 | -0.56 | 3.03E-01 | 8.23E-01 |
| AC009163.6 | -0.25 | 6.43E-01 | 1.00E+00 | -0.75 | 3.03E-01 | 8.23E-01 |
| ZNF184     | 0.24  | 4.10E-01 | 1.00E+00 | -0.47 | 3.03E-01 | 8.23E-01 |
| AL445363.3 | 2.30  | 4.29E-02 | 1.00E+00 | -0.39 | 3.03E-01 | 8.23E-01 |
| LINC01697  | 1.38  | 2.37E-01 | 1.00E+00 | -1.01 | 3.03E-01 | 8.23E-01 |
| LINC00462  | -0.32 | 7.56E-01 | 1.00E+00 | 0.86  | 3.03E-01 | 8.23E-01 |
| HAUS3      | 0.30  | 3.90E-01 | 1.00E+00 | -0.25 | 3.03E-01 | 8.23E-01 |
| LINC01612  | 3.14  | 2.11E-01 | 1.00E+00 | -1.16 | 3.03E-01 | 8.23E-01 |
| NAGPA      | -0.17 | 4.51E-01 | 1.00E+00 | 0.38  | 3.03E-01 | 8.23E-01 |
| AC084824.5 | -0.43 | 7.86E-01 | 1.00E+00 | -0.90 | 3.03E-01 | 8.23E-01 |
| ALKBH5     | 0.07  | 6.91E-01 | 1.00E+00 | -0.36 | 3.03E-01 | 8.23E-01 |
| CRHBP      | -0.16 | 8.75E-01 | 1.00E+00 | -0.93 | 3.03E-01 | 8.23E-01 |

|             |       |          |          |       |          |          |
|-------------|-------|----------|----------|-------|----------|----------|
| ZNF385B     | 0.32  | 4.72E-01 | 1.00E+00 | 0.65  | 3.03E-01 | 8.23E-01 |
| MACC1       | 0.19  | 6.11E-01 | 1.00E+00 | -0.59 | 3.03E-01 | 8.23E-01 |
| C11orf58    | 0.10  | 5.83E-01 | 1.00E+00 | -0.28 | 3.03E-01 | 8.23E-01 |
| RN7SL473P   | 1.86  | 1.85E-01 | 1.00E+00 | 0.83  | 3.03E-01 | 8.24E-01 |
| SKP1        | 0.19  | 1.69E-01 | 1.00E+00 | -0.44 | 3.04E-01 | 8.24E-01 |
| G29778      | 0.03  | 9.68E-01 | 1.00E+00 | -0.72 | 3.04E-01 | 8.24E-01 |
| ZNF512B     | -0.34 | 2.28E-01 | 1.00E+00 | 0.88  | 3.04E-01 | 8.24E-01 |
| SAMD15      | -1.78 | 1.78E-02 | 8.38E-01 | 0.90  | 3.04E-01 | 8.24E-01 |
| STAB2       | -0.61 | 5.34E-01 | 1.00E+00 | 1.19  | 3.04E-01 | 8.24E-01 |
| IGFBP6      | 0.77  | 2.74E-01 | 1.00E+00 | 0.59  | 3.04E-01 | 8.24E-01 |
| RPL13AP25   | -0.08 | 8.35E-01 | 1.00E+00 | -0.58 | 3.04E-01 | 8.24E-01 |
| BRPF3       | -0.33 | 9.44E-02 | 1.00E+00 | 0.58  | 3.04E-01 | 8.24E-01 |
| G12855      | 1.55  | 3.53E-01 | 1.00E+00 | 1.49  | 3.04E-01 | 8.24E-01 |
| SUCLA2-AS1  | -0.33 | 7.47E-01 | 1.00E+00 | -0.49 | 3.04E-01 | 8.24E-01 |
| 6-Sep       | 0.01  | 9.74E-01 | 1.00E+00 | 0.38  | 3.04E-01 | 8.24E-01 |
| AC005076.1  | 0.88  | 3.24E-01 | 1.00E+00 | -0.67 | 3.04E-01 | 8.24E-01 |
| G1863       | -0.49 | 6.99E-01 | 1.00E+00 | 1.26  | 3.04E-01 | 8.24E-01 |
| IRF2BP1     | -0.15 | 5.03E-01 | 1.00E+00 | 0.64  | 3.04E-01 | 8.24E-01 |
| OAF         | 0.29  | 6.12E-01 | 1.00E+00 | 0.76  | 3.04E-01 | 8.24E-01 |
| SMG1P2      | -0.18 | 7.48E-01 | 1.00E+00 | -0.51 | 3.04E-01 | 8.24E-01 |
| PLCD3       | -0.02 | 9.41E-01 | 1.00E+00 | 0.48  | 3.04E-01 | 8.24E-01 |
| MAP3K7CL    | 0.22  | 6.43E-01 | 1.00E+00 | 0.34  | 3.04E-01 | 8.24E-01 |
| AL137013.1  | 3.52  | 6.75E-02 | 1.00E+00 | -1.00 | 3.04E-01 | 8.24E-01 |
| UBN1        | -0.08 | 6.34E-01 | 1.00E+00 | 0.43  | 3.04E-01 | 8.24E-01 |
| C17orf64    | -1.70 | 5.55E-01 | 1.00E+00 | 1.36  | 3.04E-01 | 8.24E-01 |
| TBC1D2B     | 0.29  | 2.62E-01 | 1.00E+00 | 0.56  | 3.04E-01 | 8.24E-01 |
| AC068389.3  | 3.21  | 3.42E-01 | 1.00E+00 | 0.98  | 3.04E-01 | 8.24E-01 |
| CELSR3      | -1.26 | 1.66E-03 | 2.25E-01 | 1.16  | 3.04E-01 | 8.24E-01 |
| XLOC_003261 | 1.02  | 3.01E-01 | 1.00E+00 | -0.96 | 3.04E-01 | 8.24E-01 |
| SALL3       | -1.24 | 4.22E-01 | 1.00E+00 | -1.97 | 3.05E-01 | 8.24E-01 |
| PATZ1       | 0.11  | 7.04E-01 | 1.00E+00 | 0.53  | 3.05E-01 | 8.24E-01 |
| XLOC_012011 | -0.52 | 6.45E-01 | 1.00E+00 | 0.81  | 3.05E-01 | 8.24E-01 |



|                   |       |          |          |       |          |          |
|-------------------|-------|----------|----------|-------|----------|----------|
| <b>SPART</b>      | 0.22  | 2.41E-01 | 1.00E+00 | -0.25 | 3.05E-01 | 8.24E-01 |
| <b>CCS</b>        | -0.17 | 3.83E-01 | 1.00E+00 | 0.18  | 3.05E-01 | 8.25E-01 |
| <b>TNFSF12</b>    | 0.11  | 7.77E-01 | 1.00E+00 | 0.47  | 3.05E-01 | 8.25E-01 |
| <b>ALG5</b>       | 0.08  | 6.78E-01 | 1.00E+00 | -0.29 | 3.05E-01 | 8.25E-01 |
| <b>LINC01134</b>  | -1.99 | 1.60E-01 | 1.00E+00 | -1.09 | 3.05E-01 | 8.25E-01 |
| <b>AC005064.1</b> | 0.30  | 6.98E-01 | 1.00E+00 | -1.06 | 3.05E-01 | 8.25E-01 |
| <b>PJA1</b>       | 0.28  | 2.87E-01 | 1.00E+00 | -0.22 | 3.05E-01 | 8.25E-01 |
| <b>BTN2A2</b>     | 0.02  | 9.26E-01 | 1.00E+00 | 0.42  | 3.05E-01 | 8.25E-01 |
| <b>PGBD2</b>      | -0.56 | 1.11E-01 | 1.00E+00 | -0.33 | 3.05E-01 | 8.25E-01 |
| <b>SYNGR1</b>     | -0.34 | 1.54E-01 | 1.00E+00 | -0.29 | 3.05E-01 | 8.25E-01 |
| <b>MYCBP</b>      | 0.19  | 3.35E-01 | 1.00E+00 | -0.28 | 3.05E-01 | 8.25E-01 |
| <b>LIG3</b>       | -0.26 | 2.14E-01 | 1.00E+00 | -0.34 | 3.05E-01 | 8.25E-01 |
| <b>SERPINB9P1</b> | -0.32 | 7.84E-01 | 1.00E+00 | 0.96  | 3.05E-01 | 8.25E-01 |
| <b>AC079447.1</b> | -1.30 | 7.03E-01 | 1.00E+00 | 0.73  | 3.05E-01 | 8.25E-01 |
| <b>MGST2</b>      | 0.11  | 5.84E-01 | 1.00E+00 | -0.35 | 3.05E-01 | 8.25E-01 |
| <b>LINC00710</b>  | 2.91  | 3.57E-01 | 1.00E+00 | -1.51 | 3.06E-01 | 8.25E-01 |
| <b>RAB14</b>      | 0.19  | 2.65E-01 | 1.00E+00 | -0.24 | 3.06E-01 | 8.25E-01 |
| <b>NRSN2</b>      | -0.20 | 5.67E-01 | 1.00E+00 | 0.27  | 3.06E-01 | 8.25E-01 |
| <b>RBMXP4</b>     | 0.63  | 6.02E-01 | 1.00E+00 | 1.00  | 3.06E-01 | 8.25E-01 |
| <b>FAM219A</b>    | -0.17 | 4.49E-01 | 1.00E+00 | 0.53  | 3.06E-01 | 8.26E-01 |
| <b>ZDHHC14</b>    | -0.37 | 2.45E-01 | 1.00E+00 | 0.45  | 3.06E-01 | 8.26E-01 |
| <b>TMSB4XP1</b>   | -1.34 | 6.97E-01 | 1.00E+00 | -0.64 | 3.06E-01 | 8.26E-01 |
| <b>AC005180.2</b> | -2.16 | 1.24E-02 | 6.93E-01 | 0.85  | 3.06E-01 | 8.26E-01 |
| <b>AC016586.1</b> | -0.18 | 8.60E-01 | 1.00E+00 | 0.93  | 3.06E-01 | 8.26E-01 |
| <b>A4GALT</b>     | 0.35  | 2.90E-01 | 1.00E+00 | 0.71  | 3.06E-01 | 8.26E-01 |
| <b>TNK2-AS1</b>   | -1.83 | 7.73E-02 | 1.00E+00 | 0.84  | 3.06E-01 | 8.26E-01 |
| <b>TRIP11</b>     | -0.13 | 6.20E-01 | 1.00E+00 | -0.22 | 3.06E-01 | 8.26E-01 |
| <b>DAAM1</b>      | 0.21  | 5.11E-01 | 1.00E+00 | -0.35 | 3.06E-01 | 8.26E-01 |
| <b>EYA3</b>       | 0.08  | 7.58E-01 | 1.00E+00 | 0.32  | 3.06E-01 | 8.26E-01 |
| <b>PRKAG1</b>     | 0.00  | 9.98E-01 | 1.00E+00 | 0.16  | 3.06E-01 | 8.26E-01 |
| <b>AC103706.1</b> | 1.86  | 3.90E-01 | 1.00E+00 | 1.42  | 3.06E-01 | 8.26E-01 |
| <b>MTRF2</b>      | 0.02  | 9.78E-01 | 1.00E+00 | 0.50  | 3.07E-01 | 8.26E-01 |

|                   |       |          |          |       |          |          |
|-------------------|-------|----------|----------|-------|----------|----------|
| <b>ATP2B1-AS1</b> | -0.42 | 3.87E-01 | 1.00E+00 | 0.28  | 3.07E-01 | 8.26E-01 |
| <b>G9514</b>      | -3.20 | 1.56E-01 | 1.00E+00 | -1.13 | 3.07E-01 | 8.26E-01 |
| <b>G7242</b>      | 0.37  | 6.93E-01 | 1.00E+00 | -0.47 | 3.07E-01 | 8.26E-01 |
| <b>MET</b>        | 0.08  | 8.43E-01 | 1.00E+00 | -0.32 | 3.07E-01 | 8.26E-01 |
| <b>MYL6B</b>      | -0.08 | 7.45E-01 | 1.00E+00 | 0.23  | 3.07E-01 | 8.26E-01 |
| <b>GJA1</b>       | -0.19 | 6.52E-01 | 1.00E+00 | 0.42  | 3.07E-01 | 8.26E-01 |
| <b>LINC02572</b>  | 0.48  | 6.11E-01 | 1.00E+00 | -1.28 | 3.07E-01 | 8.26E-01 |
| <b>HLA-DMA</b>    | -0.52 | 1.29E-01 | 1.00E+00 | 0.35  | 3.07E-01 | 8.26E-01 |
| <b>AC005229.4</b> | -0.52 | 2.81E-01 | 1.00E+00 | -0.51 | 3.07E-01 | 8.26E-01 |
| <b>DNAH12</b>     | -2.30 | 3.18E-01 | 1.00E+00 | 1.13  | 3.07E-01 | 8.27E-01 |
| <b>MRPS31</b>     | 0.06  | 7.05E-01 | 1.00E+00 | -0.29 | 3.07E-01 | 8.27E-01 |
| <b>AC011468.5</b> | -2.13 | 4.73E-01 | 1.00E+00 | -1.15 | 3.07E-01 | 8.27E-01 |
| <b>EPB41L1</b>    | 0.12  | 7.80E-01 | 1.00E+00 | 0.40  | 3.07E-01 | 8.27E-01 |
| <b>CEP68</b>      | 0.09  | 7.55E-01 | 1.00E+00 | -0.25 | 3.07E-01 | 8.27E-01 |
| <b>PCDH15</b>     | 4.69  | 2.17E-02 | 8.94E-01 | -1.55 | 3.07E-01 | 8.27E-01 |
| <b>ERCC3</b>      | 0.00  | 9.88E-01 | 1.00E+00 | -0.17 | 3.07E-01 | 8.27E-01 |
| <b>ZNF136</b>     | 0.19  | 4.94E-01 | 1.00E+00 | 0.39  | 3.07E-01 | 8.27E-01 |
| <b>LIN7C</b>      | 0.28  | 3.80E-01 | 1.00E+00 | -0.45 | 3.07E-01 | 8.27E-01 |
| <b>FBXO41</b>     | -0.33 | 1.52E-01 | 1.00E+00 | 0.86  | 3.07E-01 | 8.27E-01 |
| <b>LAMP1</b>      | 0.02  | 9.22E-01 | 1.00E+00 | 0.52  | 3.07E-01 | 8.27E-01 |
| <b>SESN3</b>      | 0.18  | 7.01E-01 | 1.00E+00 | 0.37  | 3.07E-01 | 8.27E-01 |
| <b>TST</b>        | 0.07  | 8.22E-01 | 1.00E+00 | 0.37  | 3.08E-01 | 8.27E-01 |
| <b>CASS4</b>      | 0.19  | 7.37E-01 | 1.00E+00 | 0.83  | 3.08E-01 | 8.27E-01 |
| <b>MAN1C1</b>     | 0.04  | 9.02E-01 | 1.00E+00 | 0.51  | 3.08E-01 | 8.27E-01 |
| <b>FAM107B</b>    | 0.24  | 4.67E-01 | 1.00E+00 | -0.27 | 3.08E-01 | 8.27E-01 |
| <b>G22771</b>     | -0.95 | 3.21E-01 | 1.00E+00 | -0.70 | 3.08E-01 | 8.27E-01 |
| <b>GGCT</b>       | -0.19 | 7.11E-01 | 1.00E+00 | 0.53  | 3.08E-01 | 8.28E-01 |
| <b>RASGRF2</b>    | 0.46  | 5.00E-01 | 1.00E+00 | 0.54  | 3.08E-01 | 8.28E-01 |
| <b>LHFPL6</b>     | 0.64  | 7.70E-02 | 1.00E+00 | 0.43  | 3.08E-01 | 8.28E-01 |
| <b>TTC5</b>       | 0.22  | 3.26E-01 | 1.00E+00 | -0.31 | 3.08E-01 | 8.28E-01 |
| <b>LINC01268</b>  | 0.66  | 6.10E-01 | 1.00E+00 | 1.50  | 3.08E-01 | 8.28E-01 |
| <b>SERBP1P5</b>   | 0.26  | 7.09E-01 | 1.00E+00 | -0.36 | 3.08E-01 | 8.28E-01 |

|                   |       |          |          |       |          |          |
|-------------------|-------|----------|----------|-------|----------|----------|
| <b>FIBIN</b>      | 0.66  | 1.75E-01 | 1.00E+00 | 0.41  | 3.08E-01 | 8.28E-01 |
| <b>FETUB</b>      | -0.08 | 9.25E-01 | 1.00E+00 | 0.85  | 3.08E-01 | 8.28E-01 |
| <b>PYHIN1</b>     | -0.98 | 2.84E-01 | 1.00E+00 | 1.00  | 3.08E-01 | 8.28E-01 |
| <b>TMBIM6</b>     | 0.28  | 1.35E-01 | 1.00E+00 | -0.26 | 3.08E-01 | 8.28E-01 |
| <b>DCTPP1</b>     | 0.07  | 7.58E-01 | 1.00E+00 | -0.26 | 3.08E-01 | 8.28E-01 |
| <b>LINC00968</b>  | 0.23  | 7.16E-01 | 1.00E+00 | -0.69 | 3.08E-01 | 8.28E-01 |
| <b>BATF3</b>      | -0.42 | 3.03E-01 | 1.00E+00 | 0.78  | 3.08E-01 | 8.28E-01 |
| <b>TMEM61</b>     | -0.01 | 9.87E-01 | 1.00E+00 | -0.55 | 3.08E-01 | 8.28E-01 |
| <b>HOXB4</b>      | 0.38  | 3.80E-01 | 1.00E+00 | 0.61  | 3.08E-01 | 8.28E-01 |
| <b>METTL13</b>    | 0.28  | 6.69E-02 | 1.00E+00 | 0.29  | 3.08E-01 | 8.28E-01 |
| <b>SP9</b>        | 0.51  | 4.79E-01 | 1.00E+00 | -0.88 | 3.09E-01 | 8.28E-01 |
| <b>AC002128.1</b> | 4.51  | 1.19E-01 | 1.00E+00 | -1.02 | 3.09E-01 | 8.28E-01 |
| <b>PAF1</b>       | 0.13  | 5.33E-01 | 1.00E+00 | 0.26  | 3.09E-01 | 8.28E-01 |
| <b>CD200</b>      | 0.29  | 6.79E-01 | 1.00E+00 | 0.41  | 3.09E-01 | 8.28E-01 |
| <b>RNF227</b>     | 0.02  | 9.77E-01 | 1.00E+00 | -0.49 | 3.09E-01 | 8.28E-01 |
| <b>PRKCB</b>      | -0.39 | 1.00E-01 | 1.00E+00 | -0.41 | 3.09E-01 | 8.28E-01 |
| <b>EVI2A</b>      | 0.20  | 7.85E-01 | 1.00E+00 | 0.44  | 3.09E-01 | 8.28E-01 |
| <b>LAIR1</b>      | 1.32  | 1.20E-01 | 1.00E+00 | 0.73  | 3.09E-01 | 8.28E-01 |
| <b>CARD8-AS1</b>  | 0.64  | 2.17E-01 | 1.00E+00 | 0.66  | 3.09E-01 | 8.28E-01 |
| <b>CIAPIN1</b>    | 0.03  | 8.61E-01 | 1.00E+00 | -0.19 | 3.09E-01 | 8.28E-01 |
| <b>ENTPD1</b>     | 0.09  | 7.71E-01 | 1.00E+00 | 0.44  | 3.09E-01 | 8.28E-01 |
| <b>HCN3</b>       | -0.55 | 5.46E-02 | 1.00E+00 | -0.59 | 3.09E-01 | 8.28E-01 |
| <b>RAMP2</b>      | 0.19  | 6.97E-01 | 1.00E+00 | -0.44 | 3.09E-01 | 8.28E-01 |
| <b>MRPL52</b>     | -0.14 | 5.26E-01 | 1.00E+00 | -0.28 | 3.09E-01 | 8.28E-01 |
| <b>RGS17</b>      | 0.38  | 7.61E-01 | 1.00E+00 | 0.86  | 3.09E-01 | 8.28E-01 |
| <b>ADGRF3</b>     | 0.00  | 9.97E-01 | 1.00E+00 | 1.04  | 3.09E-01 | 8.28E-01 |
| <b>BAG5</b>       | 0.00  | 9.98E-01 | 1.00E+00 | -0.21 | 3.09E-01 | 8.28E-01 |
| <b>LAMA5</b>      | -0.39 | 2.70E-01 | 1.00E+00 | 0.74  | 3.09E-01 | 8.28E-01 |
| <b>FGF17</b>      | -0.10 | 8.82E-01 | 1.00E+00 | -1.63 | 3.09E-01 | 8.29E-01 |
| <b>MT-CO3</b>     | -0.11 | 8.12E-01 | 1.00E+00 | -0.33 | 3.09E-01 | 8.29E-01 |
| <b>CHEK1</b>      | -0.14 | 5.51E-01 | 1.00E+00 | 0.27  | 3.09E-01 | 8.29E-01 |
| <b>NFE2L1</b>     | -0.05 | 7.64E-01 | 1.00E+00 | 0.54  | 3.10E-01 | 8.29E-01 |

|             |       |          |          |       |          |          |
|-------------|-------|----------|----------|-------|----------|----------|
| H3F3B       | -0.22 | 4.35E-01 | 1.00E+00 | -0.40 | 3.10E-01 | 8.29E-01 |
| KLHDC7B     | -2.29 | 9.80E-02 | 1.00E+00 | 3.18  | 3.10E-01 | 8.29E-01 |
| FOXD2       | -0.36 | 6.15E-01 | 1.00E+00 | 0.77  | 3.10E-01 | 8.29E-01 |
| TEKT3       | 0.28  | 6.47E-01 | 1.00E+00 | -0.72 | 3.10E-01 | 8.29E-01 |
| AL031775.1  | 2.57  | 1.04E-01 | 1.00E+00 | -0.87 | 3.10E-01 | 8.29E-01 |
| RER1        | 0.13  | 4.15E-01 | 1.00E+00 | -0.23 | 3.10E-01 | 8.29E-01 |
| LINC00674   | 0.09  | 8.02E-01 | 1.00E+00 | -0.32 | 3.10E-01 | 8.29E-01 |
| NFKBIB      | 0.01  | 9.79E-01 | 1.00E+00 | 0.41  | 3.10E-01 | 8.29E-01 |
| FZD6        | 0.20  | 4.65E-01 | 1.00E+00 | -0.24 | 3.10E-01 | 8.29E-01 |
| LY6E-DT     | 0.16  | 7.88E-01 | 1.00E+00 | 0.55  | 3.10E-01 | 8.29E-01 |
| SNORD3B-1   | 0.62  | 6.07E-01 | 1.00E+00 | -0.84 | 3.10E-01 | 8.29E-01 |
| PPP1R1B     | 0.36  | 6.33E-01 | 1.00E+00 | -0.68 | 3.10E-01 | 8.29E-01 |
| DGAT2L6     | 0.70  | 8.28E-01 | 1.00E+00 | -3.19 | 3.10E-01 | 8.29E-01 |
| SNRNP48     | 0.04  | 8.91E-01 | 1.00E+00 | -0.22 | 3.10E-01 | 8.29E-01 |
| ZNF106      | 0.40  | 2.26E-01 | 1.00E+00 | -0.30 | 3.10E-01 | 8.29E-01 |
| TAF2        | 0.02  | 9.25E-01 | 1.00E+00 | -0.16 | 3.10E-01 | 8.29E-01 |
| ELK1        | -0.22 | 3.03E-01 | 1.00E+00 | 0.34  | 3.10E-01 | 8.29E-01 |
| PGLYRP2     | -1.80 | 1.31E-01 | 1.00E+00 | 0.97  | 3.10E-01 | 8.29E-01 |
| AC025809.2  | NA    | NA       | NA       | -2.14 | 3.10E-01 | 8.29E-01 |
| SKAP1       | 0.28  | 6.38E-01 | 1.00E+00 | 0.37  | 3.10E-01 | 8.29E-01 |
| XLOC_014155 | -0.31 | 9.09E-01 | 1.00E+00 | -1.29 | 3.10E-01 | 8.29E-01 |
| APLF        | -0.02 | 9.66E-01 | 1.00E+00 | -0.33 | 3.11E-01 | 8.29E-01 |
| AC016582.3  | 0.06  | 8.95E-01 | 1.00E+00 | -0.73 | 3.11E-01 | 8.29E-01 |
| SEMA3E      | 0.12  | 8.39E-01 | 1.00E+00 | -0.66 | 3.11E-01 | 8.29E-01 |
| XLOC_007942 | 0.70  | 6.68E-01 | 1.00E+00 | 0.96  | 3.11E-01 | 8.29E-01 |
| AL031587.5  | -0.58 | 4.98E-01 | 1.00E+00 | 0.86  | 3.11E-01 | 8.29E-01 |
| HSPA7       | -1.17 | 1.91E-01 | 1.00E+00 | 0.69  | 3.11E-01 | 8.29E-01 |
| RAB32       | 0.10  | 7.33E-01 | 1.00E+00 | -0.52 | 3.11E-01 | 8.29E-01 |
| IFITM2      | -0.18 | 6.27E-01 | 1.00E+00 | 0.37  | 3.11E-01 | 8.29E-01 |
| AL158050.1  | 1.52  | 5.47E-01 | 1.00E+00 | -0.76 | 3.11E-01 | 8.29E-01 |
| ATF6        | 0.00  | 9.91E-01 | 1.00E+00 | -0.12 | 3.11E-01 | 8.29E-01 |
| LSM6        | 0.28  | 1.85E-01 | 1.00E+00 | -0.31 | 3.11E-01 | 8.29E-01 |

|                   |       |          |          |       |          |          |
|-------------------|-------|----------|----------|-------|----------|----------|
| <b>CROCCP2</b>    | 0.37  | 4.24E-01 | 1.00E+00 | 0.57  | 3.11E-01 | 8.29E-01 |
| <b>KNDC1</b>      | -2.78 | 3.46E-06 | 1.15E-03 | 1.22  | 3.11E-01 | 8.30E-01 |
| <b>AL049634.1</b> | 0.25  | 9.42E-01 | 1.00E+00 | 2.12  | 3.11E-01 | 8.30E-01 |
| <b>RXRB</b>       | 0.18  | 4.57E-01 | 1.00E+00 | 0.46  | 3.11E-01 | 8.30E-01 |
| <b>PFN2</b>       | -0.19 | 6.68E-01 | 1.00E+00 | -0.32 | 3.11E-01 | 8.30E-01 |
| <b>LAMP5</b>      | 0.15  | 8.21E-01 | 1.00E+00 | 0.70  | 3.11E-01 | 8.30E-01 |
| <b>SLC25A25</b>   | -0.98 | 1.76E-01 | 1.00E+00 | 0.58  | 3.11E-01 | 8.30E-01 |
| <b>SMAD5-AS1</b>  | -0.03 | 9.83E-01 | 1.00E+00 | -0.94 | 3.11E-01 | 8.30E-01 |
| <b>ARMC7</b>      | 0.01  | 9.59E-01 | 1.00E+00 | 0.38  | 3.11E-01 | 8.30E-01 |
| <b>AC079210.1</b> | -2.45 | 2.73E-01 | 1.00E+00 | 1.24  | 3.11E-01 | 8.30E-01 |
| <b>MYH16</b>      | -2.32 | 2.42E-01 | 1.00E+00 | 1.12  | 3.11E-01 | 8.30E-01 |
| <b>AL138831.1</b> | 3.12  | 3.46E-01 | 1.00E+00 | 1.26  | 3.11E-01 | 8.30E-01 |
| <b>ZBTB45</b>     | -0.08 | 7.40E-01 | 1.00E+00 | 0.35  | 3.12E-01 | 8.30E-01 |
| <b>TDO2</b>       | -1.64 | 1.10E-01 | 1.00E+00 | 3.18  | 3.12E-01 | 8.30E-01 |
| <b>RPL19</b>      | -0.20 | 4.67E-01 | 1.00E+00 | 0.23  | 3.12E-01 | 8.30E-01 |
| <b>USP13</b>      | 0.34  | 2.31E-01 | 1.00E+00 | -0.35 | 3.12E-01 | 8.30E-01 |
| <b>GNAI1</b>      | 0.22  | 4.91E-01 | 1.00E+00 | -0.30 | 3.12E-01 | 8.30E-01 |
| <b>MSL2</b>       | -0.03 | 9.01E-01 | 1.00E+00 | -0.36 | 3.12E-01 | 8.30E-01 |
| <b>G10958</b>     | -2.03 | 3.72E-02 | 1.00E+00 | 0.67  | 3.12E-01 | 8.30E-01 |
| <b>AL591845.1</b> | -0.45 | 4.66E-01 | 1.00E+00 | 0.76  | 3.12E-01 | 8.30E-01 |
| <b>DAB1</b>       | -1.00 | 1.92E-01 | 1.00E+00 | -1.07 | 3.12E-01 | 8.30E-01 |
| <b>HNRNPA3</b>    | -0.04 | 8.36E-01 | 1.00E+00 | 0.38  | 3.12E-01 | 8.30E-01 |
| <b>ASB1</b>       | 0.43  | 3.43E-01 | 1.00E+00 | 0.41  | 3.12E-01 | 8.30E-01 |
| <b>RUSC1</b>      | -0.24 | 3.03E-01 | 1.00E+00 | 0.25  | 3.12E-01 | 8.30E-01 |
| <b>TRDJ1</b>      | 0.67  | 8.43E-01 | 1.00E+00 | -1.19 | 3.12E-01 | 8.30E-01 |
| <b>EDA2R</b>      | 0.13  | 7.77E-01 | 1.00E+00 | 0.76  | 3.12E-01 | 8.30E-01 |
| <b>PPP2CA</b>     | 0.02  | 9.56E-01 | 1.00E+00 | -0.29 | 3.12E-01 | 8.30E-01 |
| <b>GNG12</b>      | 0.03  | 9.08E-01 | 1.00E+00 | -0.26 | 3.12E-01 | 8.30E-01 |
| <b>KARSP2</b>     | -1.41 | 2.79E-01 | 1.00E+00 | -1.41 | 3.12E-01 | 8.30E-01 |
| <b>STMN1</b>      | -0.23 | 2.27E-01 | 1.00E+00 | -0.30 | 3.12E-01 | 8.30E-01 |
| <b>USP34</b>      | 0.00  | 9.94E-01 | 1.00E+00 | 0.39  | 3.12E-01 | 8.30E-01 |
| <b>AC092427.1</b> | -1.78 | 6.06E-01 | 1.00E+00 | -1.48 | 3.12E-01 | 8.30E-01 |

|             |       |          |          |       |          |          |
|-------------|-------|----------|----------|-------|----------|----------|
| KIF20A      | 0.16  | 6.56E-01 | 1.00E+00 | 0.60  | 3.12E-01 | 8.31E-01 |
| DYNC1I2P1   | -0.26 | 6.32E-01 | 1.00E+00 | 0.22  | 3.13E-01 | 8.31E-01 |
| AC024075.3  | 0.29  | 6.08E-01 | 1.00E+00 | 0.65  | 3.13E-01 | 8.31E-01 |
| XLOC_010311 | 0.23  | 6.38E-01 | 1.00E+00 | -1.05 | 3.13E-01 | 8.31E-01 |
| PRKACB      | -0.08 | 8.60E-01 | 1.00E+00 | -0.30 | 3.13E-01 | 8.31E-01 |
| SLC9A4      | -0.06 | 9.06E-01 | 1.00E+00 | -0.93 | 3.13E-01 | 8.31E-01 |
| BTBD19      | 0.59  | 3.36E-01 | 1.00E+00 | 0.76  | 3.13E-01 | 8.31E-01 |
| C19orf12    | 0.28  | 2.90E-01 | 1.00E+00 | -0.40 | 3.13E-01 | 8.31E-01 |
| LINC00982   | -0.78 | 1.35E-01 | 1.00E+00 | -1.02 | 3.13E-01 | 8.31E-01 |
| RPS6KA4     | -0.34 | 2.63E-01 | 1.00E+00 | 0.69  | 3.13E-01 | 8.31E-01 |
| AC022400.7  | 0.22  | 6.42E-01 | 1.00E+00 | -0.41 | 3.13E-01 | 8.31E-01 |
| ZNF548      | 0.20  | 3.12E-01 | 1.00E+00 | -0.23 | 3.13E-01 | 8.31E-01 |
| KCNN4       | 0.05  | 9.65E-01 | 1.00E+00 | -0.51 | 3.13E-01 | 8.31E-01 |
| AC116353.5  | -2.57 | 1.10E-01 | 1.00E+00 | 0.82  | 3.13E-01 | 8.31E-01 |
| AC005332.5  | 0.49  | 4.52E-01 | 1.00E+00 | 0.67  | 3.13E-01 | 8.31E-01 |
| HDAC3       | 0.11  | 5.33E-01 | 1.00E+00 | -0.19 | 3.13E-01 | 8.31E-01 |
| TPTEP2      | 0.25  | 5.65E-01 | 1.00E+00 | 0.28  | 3.13E-01 | 8.32E-01 |
| RRP36       | -0.22 | 3.22E-01 | 1.00E+00 | -0.55 | 3.13E-01 | 8.32E-01 |
| KCNA2       | 0.09  | 9.02E-01 | 1.00E+00 | -1.12 | 3.14E-01 | 8.32E-01 |
| STK26       | -0.13 | 7.37E-01 | 1.00E+00 | -0.32 | 3.14E-01 | 8.32E-01 |
| PRRX1       | -0.03 | 9.41E-01 | 1.00E+00 | 0.64  | 3.14E-01 | 8.32E-01 |
| DAD1        | -0.01 | 9.33E-01 | 1.00E+00 | -0.31 | 3.14E-01 | 8.32E-01 |
| XLOC_009615 | -0.03 | 9.85E-01 | 1.00E+00 | -1.49 | 3.14E-01 | 8.32E-01 |
| RPL21P120   | 2.75  | 3.93E-01 | 1.00E+00 | -0.64 | 3.14E-01 | 8.32E-01 |
| ROBO3       | 0.28  | 5.68E-01 | 1.00E+00 | 0.53  | 3.14E-01 | 8.32E-01 |
| ZNF148      | 0.14  | 5.09E-01 | 1.00E+00 | -0.17 | 3.14E-01 | 8.32E-01 |
| GPR4        | -0.50 | 4.10E-01 | 1.00E+00 | 0.79  | 3.14E-01 | 8.32E-01 |
| AC026471.1  | -0.21 | 6.03E-01 | 1.00E+00 | 0.47  | 3.14E-01 | 8.32E-01 |
| IPO7        | 0.16  | 3.38E-01 | 1.00E+00 | 0.38  | 3.14E-01 | 8.32E-01 |
| ZNF511      | 0.57  | 8.14E-02 | 1.00E+00 | -0.32 | 3.14E-01 | 8.32E-01 |
| AC004890.1  | -2.54 | 4.56E-01 | 1.00E+00 | -0.68 | 3.14E-01 | 8.32E-01 |
| COL8A2      | -0.12 | 7.80E-01 | 1.00E+00 | 0.61  | 3.14E-01 | 8.32E-01 |

|                   |       |          |          |       |          |          |
|-------------------|-------|----------|----------|-------|----------|----------|
| <b>TUBGCP4</b>    | 0.00  | 9.90E-01 | 1.00E+00 | -0.21 | 3.14E-01 | 8.32E-01 |
| <b>MINK1</b>      | -0.19 | 4.90E-01 | 1.00E+00 | 0.61  | 3.14E-01 | 8.32E-01 |
| <b>NAT10</b>      | 0.01  | 9.68E-01 | 1.00E+00 | -0.31 | 3.14E-01 | 8.32E-01 |
| <b>SOCS7</b>      | 0.35  | 3.51E-01 | 1.00E+00 | 0.43  | 3.14E-01 | 8.32E-01 |
| <b>AC007533.1</b> | 1.94  | 5.51E-01 | 1.00E+00 | -1.26 | 3.14E-01 | 8.32E-01 |
| <b>NXT2</b>       | 0.07  | 8.28E-01 | 1.00E+00 | -0.41 | 3.14E-01 | 8.32E-01 |
| <b>RUVBL2</b>     | -0.24 | 2.18E-01 | 1.00E+00 | 0.16  | 3.14E-01 | 8.32E-01 |
| <b>CA5B</b>       | 0.18  | 6.03E-01 | 1.00E+00 | 0.37  | 3.15E-01 | 8.33E-01 |
| <b>NT5DC1</b>     | -0.32 | 1.60E-01 | 1.00E+00 | -0.19 | 3.15E-01 | 8.33E-01 |
| <b>LOXL1</b>      | -0.16 | 7.43E-01 | 1.00E+00 | 0.73  | 3.15E-01 | 8.33E-01 |
| <b>CHMP1B2P</b>   | -0.96 | 2.35E-01 | 1.00E+00 | -0.73 | 3.15E-01 | 8.33E-01 |
| <b>GPR63</b>      | -0.99 | 6.30E-02 | 1.00E+00 | -0.81 | 3.15E-01 | 8.33E-01 |
| <b>CSGALNACT1</b> | 0.30  | 4.60E-01 | 1.00E+00 | 0.47  | 3.15E-01 | 8.33E-01 |
| <b>CXorf38</b>    | -0.02 | 9.13E-01 | 1.00E+00 | 0.26  | 3.15E-01 | 8.33E-01 |
| <b>LPO</b>        | -0.09 | 9.44E-01 | 1.00E+00 | 1.53  | 3.15E-01 | 8.33E-01 |
| <b>C9orf153</b>   | -1.90 | 5.50E-01 | 1.00E+00 | -1.28 | 3.15E-01 | 8.33E-01 |
| <b>HMGXB3</b>     | -0.15 | 5.29E-01 | 1.00E+00 | 0.56  | 3.15E-01 | 8.33E-01 |
| <b>CCL23</b>      | 0.08  | 8.97E-01 | 1.00E+00 | 0.64  | 3.15E-01 | 8.33E-01 |
| <b>TLL1</b>       | 0.14  | 7.31E-01 | 1.00E+00 | 0.42  | 3.15E-01 | 8.33E-01 |
| <b>KCNF1</b>      | -3.56 | 2.07E-03 | 2.39E-01 | 1.74  | 3.15E-01 | 8.33E-01 |
| <b>CHMP2A</b>     | -0.05 | 7.49E-01 | 1.00E+00 | -0.15 | 3.15E-01 | 8.33E-01 |
| <b>AC092809.3</b> | -1.07 | 5.40E-01 | 1.00E+00 | -0.68 | 3.15E-01 | 8.33E-01 |
| <b>HNRNPH3</b>    | -0.07 | 7.16E-01 | 1.00E+00 | -0.16 | 3.15E-01 | 8.34E-01 |
| <b>ZCCHC17</b>    | 0.00  | 9.95E-01 | 1.00E+00 | -0.22 | 3.15E-01 | 8.34E-01 |
| <b>GDPD1</b>      | -0.23 | 5.95E-01 | 1.00E+00 | -0.58 | 3.15E-01 | 8.34E-01 |
| <b>AP3D1</b>      | -0.08 | 6.98E-01 | 1.00E+00 | 0.48  | 3.16E-01 | 8.34E-01 |
| <b>TUBB1</b>      | 0.44  | 6.73E-01 | 1.00E+00 | -1.34 | 3.16E-01 | 8.34E-01 |
| <b>CDC23</b>      | 0.03  | 8.58E-01 | 1.00E+00 | -0.28 | 3.16E-01 | 8.34E-01 |
| <b>PGBD4</b>      | 0.13  | 7.61E-01 | 1.00E+00 | 0.43  | 3.16E-01 | 8.34E-01 |
| <b>LMAN2</b>      | -0.05 | 7.79E-01 | 1.00E+00 | 0.17  | 3.16E-01 | 8.34E-01 |
| <b>ZNF217</b>     | -0.25 | 2.68E-01 | 1.00E+00 | 0.38  | 3.16E-01 | 8.34E-01 |
| <b>MORN2</b>      | 0.02  | 9.22E-01 | 1.00E+00 | -0.37 | 3.16E-01 | 8.34E-01 |

|             |       |          |          |       |          |          |
|-------------|-------|----------|----------|-------|----------|----------|
| NNT         | 0.17  | 7.08E-01 | 1.00E+00 | -0.28 | 3.16E-01 | 8.34E-01 |
| IDH1-AS1    | -0.12 | 9.11E-01 | 1.00E+00 | -0.76 | 3.16E-01 | 8.34E-01 |
| PEA15       | 0.10  | 5.89E-01 | 1.00E+00 | 0.26  | 3.16E-01 | 8.34E-01 |
| SNAP91      | -0.92 | 7.84E-01 | 1.00E+00 | 1.47  | 3.16E-01 | 8.34E-01 |
| G36419      | -3.45 | 3.63E-02 | 1.00E+00 | -0.86 | 3.16E-01 | 8.34E-01 |
| PCBP2       | -0.06 | 8.01E-01 | 1.00E+00 | 0.32  | 3.16E-01 | 8.34E-01 |
| PMS1        | -0.26 | 4.16E-01 | 1.00E+00 | -0.39 | 3.16E-01 | 8.34E-01 |
| LRIG2       | -0.02 | 9.32E-01 | 1.00E+00 | -0.25 | 3.16E-01 | 8.34E-01 |
| LDLRAD2     | 0.77  | 1.36E-01 | 1.00E+00 | 0.86  | 3.16E-01 | 8.34E-01 |
| ZSCAN16     | -0.23 | 4.82E-01 | 1.00E+00 | -0.40 | 3.16E-01 | 8.34E-01 |
| ZNF609      | -0.38 | 1.10E-01 | 1.00E+00 | 0.61  | 3.16E-01 | 8.34E-01 |
| ALG6        | 0.09  | 7.64E-01 | 1.00E+00 | -0.38 | 3.16E-01 | 8.34E-01 |
| HIST2H2BF   | -0.91 | 2.05E-01 | 1.00E+00 | -0.68 | 3.16E-01 | 8.34E-01 |
| LINC01150   | -1.12 | 3.41E-01 | 1.00E+00 | 1.05  | 3.16E-01 | 8.34E-01 |
| AC114488.2  | 1.64  | 6.29E-02 | 1.00E+00 | 0.68  | 3.16E-01 | 8.34E-01 |
| TTC1        | -0.01 | 9.42E-01 | 1.00E+00 | -0.32 | 3.17E-01 | 8.35E-01 |
| AC005083.1  | 0.39  | 2.79E-01 | 1.00E+00 | -0.71 | 3.17E-01 | 8.35E-01 |
| G16361      | -4.77 | 1.55E-01 | 1.00E+00 | 0.69  | 3.17E-01 | 8.35E-01 |
| AD000090.1  | 0.13  | 6.83E-01 | 1.00E+00 | -0.99 | 3.17E-01 | 8.35E-01 |
| CD99L2      | 0.59  | 2.12E-01 | 1.00E+00 | 0.53  | 3.17E-01 | 8.35E-01 |
| SMC5        | -0.24 | 3.01E-01 | 1.00E+00 | -0.24 | 3.17E-01 | 8.35E-01 |
| MIR22HG     | -0.08 | 7.87E-01 | 1.00E+00 | 0.27  | 3.17E-01 | 8.35E-01 |
| VSIG8       | 0.29  | 6.85E-01 | 1.00E+00 | -0.91 | 3.17E-01 | 8.35E-01 |
| CEP78       | -0.53 | 2.38E-03 | 2.47E-01 | -0.27 | 3.17E-01 | 8.35E-01 |
| SERPINC1    | 0.54  | 7.42E-01 | 1.00E+00 | 1.28  | 3.17E-01 | 8.35E-01 |
| AC006042.4  | -2.16 | 1.93E-01 | 1.00E+00 | 0.74  | 3.17E-01 | 8.35E-01 |
| CYTOR       | -0.18 | 7.49E-01 | 1.00E+00 | 0.41  | 3.17E-01 | 8.35E-01 |
| EIF1P3      | 1.35  | 6.96E-01 | 1.00E+00 | -0.78 | 3.17E-01 | 8.35E-01 |
| DUSP15      | -0.30 | 5.34E-01 | 1.00E+00 | 0.79  | 3.17E-01 | 8.35E-01 |
| XLOC_006870 | -0.34 | 5.64E-01 | 1.00E+00 | -0.95 | 3.17E-01 | 8.35E-01 |
| AP001267.3  | -3.26 | 3.69E-02 | 1.00E+00 | -1.06 | 3.17E-01 | 8.35E-01 |
| MAOB        | 0.74  | 1.66E-01 | 1.00E+00 | -0.51 | 3.17E-01 | 8.35E-01 |



|                    |       |          |          |       |          |          |
|--------------------|-------|----------|----------|-------|----------|----------|
| <b>AC125437.1</b>  | -0.87 | 3.81E-01 | 1.00E+00 | 0.99  | 3.17E-01 | 8.35E-01 |
| <b>CYP3A7</b>      | -0.53 | 8.66E-01 | 1.00E+00 | -1.08 | 3.17E-01 | 8.35E-01 |
| <b>NRAS</b>        | 0.05  | 8.59E-01 | 1.00E+00 | 0.16  | 3.17E-01 | 8.35E-01 |
| <b>FMO4</b>        | 0.23  | 5.33E-01 | 1.00E+00 | 0.40  | 3.17E-01 | 8.35E-01 |
| <b>TFF3</b>        | 0.14  | 6.95E-01 | 1.00E+00 | 0.54  | 3.17E-01 | 8.35E-01 |
| <b>LINC01285</b>   | -0.99 | 6.66E-01 | 1.00E+00 | -1.54 | 3.18E-01 | 8.35E-01 |
| <b>WNT2B</b>       | 0.30  | 3.68E-01 | 1.00E+00 | -0.53 | 3.18E-01 | 8.35E-01 |
| <b>TTBK1</b>       | -2.19 | 4.79E-01 | 1.00E+00 | 1.52  | 3.18E-01 | 8.35E-01 |
| <b>AP000462.2</b>  | NA    | NA       | NA       | -1.73 | 3.18E-01 | 8.35E-01 |
| <b>IFFO2</b>       | -0.15 | 7.82E-01 | 1.00E+00 | 0.59  | 3.18E-01 | 8.35E-01 |
| <b>ANGPTL7</b>     | -0.86 | 2.09E-01 | 1.00E+00 | 0.88  | 3.18E-01 | 8.35E-01 |
| <b>ZCCHC3</b>      | 0.25  | 2.81E-01 | 1.00E+00 | 0.46  | 3.18E-01 | 8.35E-01 |
| <b>ZBTB34</b>      | 0.36  | 1.26E-01 | 1.00E+00 | 0.35  | 3.18E-01 | 8.35E-01 |
| <b>LINC02256</b>   | 0.31  | 7.05E-01 | 1.00E+00 | -0.44 | 3.18E-01 | 8.35E-01 |
| <b>CALM1</b>       | 0.03  | 8.61E-01 | 1.00E+00 | -0.24 | 3.18E-01 | 8.35E-01 |
| <b>AL391807.1</b>  | -0.65 | 6.97E-01 | 1.00E+00 | -1.55 | 3.18E-01 | 8.35E-01 |
| <b>EHD3</b>        | -0.55 | 7.47E-02 | 1.00E+00 | 0.51  | 3.18E-01 | 8.35E-01 |
| <b>TYRP1</b>       | 0.59  | 3.80E-01 | 1.00E+00 | 0.83  | 3.18E-01 | 8.35E-01 |
| <b>FAM86JP</b>     | -0.16 | 7.13E-01 | 1.00E+00 | 0.40  | 3.18E-01 | 8.35E-01 |
| <b>AP002954.1</b>  | -1.11 | 4.93E-01 | 1.00E+00 | 1.21  | 3.18E-01 | 8.35E-01 |
| <b>AL356479.1</b>  | -0.53 | 5.75E-01 | 1.00E+00 | -0.74 | 3.18E-01 | 8.35E-01 |
| <b>ENY2</b>        | 0.13  | 4.46E-01 | 1.00E+00 | -0.22 | 3.18E-01 | 8.35E-01 |
| <b>KATNA1</b>      | 0.02  | 9.37E-01 | 1.00E+00 | -0.29 | 3.18E-01 | 8.35E-01 |
| <b>LINC02001</b>   | -0.36 | 2.58E-01 | 1.00E+00 | -0.40 | 3.18E-01 | 8.35E-01 |
| <b>AC092171.3</b>  | -0.43 | 7.68E-02 | 1.00E+00 | 0.78  | 3.18E-01 | 8.35E-01 |
| <b>TFAP2B</b>      | -0.38 | 2.55E-01 | 1.00E+00 | -0.47 | 3.18E-01 | 8.35E-01 |
| <b>OR7E22P</b>     | -2.86 | 1.48E-02 | 7.62E-01 | 0.96  | 3.18E-01 | 8.35E-01 |
| <b>RPL27A</b>      | -0.18 | 5.05E-01 | 1.00E+00 | 0.31  | 3.18E-01 | 8.35E-01 |
| <b>XLOC_012077</b> | 0.19  | 8.71E-01 | 1.00E+00 | -0.99 | 3.18E-01 | 8.35E-01 |
| <b>HOXD11</b>      | 1.07  | 5.06E-01 | 1.00E+00 | 1.30  | 3.18E-01 | 8.35E-01 |
| <b>GOLGA8A</b>     | 0.21  | 7.84E-01 | 1.00E+00 | 0.70  | 3.18E-01 | 8.35E-01 |
| <b>SEMA4G</b>      | -0.65 | 1.04E-01 | 1.00E+00 | 0.57  | 3.18E-01 | 8.35E-01 |

|            |       |          |          |       |          |          |
|------------|-------|----------|----------|-------|----------|----------|
| PLBD1      | -0.06 | 8.55E-01 | 1.00E+00 | 0.27  | 3.18E-01 | 8.35E-01 |
| AC084809.1 | -1.40 | 2.23E-01 | 1.00E+00 | 0.66  | 3.18E-01 | 8.35E-01 |
| COA7       | -0.06 | 8.13E-01 | 1.00E+00 | 0.35  | 3.18E-01 | 8.35E-01 |
| IL2RB      | 0.12  | 6.98E-01 | 1.00E+00 | 0.70  | 3.18E-01 | 8.35E-01 |
| BMS1P16    | -3.07 | 3.54E-01 | 1.00E+00 | 0.81  | 3.18E-01 | 8.35E-01 |
| CRCT1      | 0.54  | 3.93E-01 | 1.00E+00 | 0.76  | 3.18E-01 | 8.35E-01 |
| SNX1       | 0.05  | 7.88E-01 | 1.00E+00 | 0.15  | 3.19E-01 | 8.35E-01 |
| NFKBIA     | -0.82 | 1.62E-01 | 1.00E+00 | 0.42  | 3.19E-01 | 8.35E-01 |
| Z73417.1   | -1.14 | 2.71E-01 | 1.00E+00 | 1.03  | 3.19E-01 | 8.35E-01 |
| SLC22A15   | 0.14  | 7.76E-01 | 1.00E+00 | -0.47 | 3.19E-01 | 8.35E-01 |
| DUSP10     | -0.01 | 9.68E-01 | 1.00E+00 | 0.26  | 3.19E-01 | 8.35E-01 |
| C10orf82   | 0.39  | 6.50E-01 | 1.00E+00 | -0.92 | 3.19E-01 | 8.35E-01 |
| DUSP2      | -1.70 | 4.31E-02 | 1.00E+00 | -0.53 | 3.19E-01 | 8.35E-01 |
| AC106786.2 | -2.00 | 2.55E-01 | 1.00E+00 | 0.84  | 3.19E-01 | 8.35E-01 |
| RPP25      | -0.07 | 8.10E-01 | 1.00E+00 | 0.42  | 3.19E-01 | 8.35E-01 |
| CYP7B1     | -0.26 | 5.11E-01 | 1.00E+00 | 0.35  | 3.19E-01 | 8.35E-01 |
| RPS7P10    | -0.76 | 4.12E-01 | 1.00E+00 | -0.48 | 3.19E-01 | 8.35E-01 |
| MTM1       | 0.06  | 7.95E-01 | 1.00E+00 | -0.28 | 3.19E-01 | 8.35E-01 |
| AL049776.1 | 0.89  | 5.90E-01 | 1.00E+00 | 0.98  | 3.19E-01 | 8.35E-01 |
| CCDC25     | 0.06  | 7.70E-01 | 1.00E+00 | -0.18 | 3.19E-01 | 8.35E-01 |
| G3632      | 1.53  | 9.18E-02 | 1.00E+00 | -0.89 | 3.19E-01 | 8.35E-01 |
| FOXP4-AS1  | 0.42  | 8.44E-01 | 1.00E+00 | -1.36 | 3.19E-01 | 8.35E-01 |
| DCTN4      | 0.06  | 7.15E-01 | 1.00E+00 | 0.17  | 3.19E-01 | 8.35E-01 |
| AC097532.2 | -0.20 | 8.20E-01 | 1.00E+00 | 0.72  | 3.19E-01 | 8.35E-01 |
| CACUL1     | 0.24  | 2.81E-01 | 1.00E+00 | 0.25  | 3.19E-01 | 8.35E-01 |
| VWA7       | -0.39 | 3.02E-01 | 1.00E+00 | -0.82 | 3.19E-01 | 8.35E-01 |
| MAGI3      | -0.18 | 6.18E-01 | 1.00E+00 | -0.35 | 3.19E-01 | 8.35E-01 |
| LINC00327  | 0.26  | 6.34E-01 | 1.00E+00 | -0.69 | 3.20E-01 | 8.35E-01 |
| BNIP2      | 0.21  | 3.40E-01 | 1.00E+00 | -0.24 | 3.20E-01 | 8.35E-01 |
| ZNF629     | -0.41 | 1.38E-01 | 1.00E+00 | 0.51  | 3.20E-01 | 8.35E-01 |
| ZNF391     | 0.81  | 1.03E-01 | 1.00E+00 | -0.51 | 3.20E-01 | 8.35E-01 |
| AL731566.1 | 0.04  | 9.79E-01 | 1.00E+00 | 0.69  | 3.20E-01 | 8.35E-01 |

|            |       |          |          |       |          |          |
|------------|-------|----------|----------|-------|----------|----------|
| KATNB1     | -0.22 | 4.50E-01 | 1.00E+00 | 0.22  | 3.20E-01 | 8.35E-01 |
| PKD1P6     | -0.92 | 3.17E-02 | 1.00E+00 | 0.70  | 3.20E-01 | 8.35E-01 |
| LSM12P1    | -0.69 | 5.19E-01 | 1.00E+00 | -0.32 | 3.20E-01 | 8.35E-01 |
| ARHGEF28   | -0.07 | 7.01E-01 | 1.00E+00 | -0.31 | 3.20E-01 | 8.35E-01 |
| FAM90A1    | 1.17  | 1.35E-01 | 1.00E+00 | 1.06  | 3.20E-01 | 8.35E-01 |
| RAPGEF6    | 0.09  | 7.89E-01 | 1.00E+00 | 0.39  | 3.20E-01 | 8.35E-01 |
| MED24      | -0.08 | 7.26E-01 | 1.00E+00 | 0.39  | 3.20E-01 | 8.35E-01 |
| CORIN      | -0.04 | 9.70E-01 | 1.00E+00 | 0.65  | 3.20E-01 | 8.35E-01 |
| PATL2      | -1.23 | 1.56E-01 | 1.00E+00 | 0.82  | 3.20E-01 | 8.35E-01 |
| SH3BGR     | -3.06 | 1.23E-01 | 1.00E+00 | -0.76 | 3.20E-01 | 8.35E-01 |
| TROVE2     | 0.11  | 6.35E-01 | 1.00E+00 | -0.41 | 3.20E-01 | 8.35E-01 |
| UQCRB      | 0.09  | 7.13E-01 | 1.00E+00 | -0.22 | 3.20E-01 | 8.35E-01 |
| AC007681.1 | 0.45  | 5.80E-01 | 1.00E+00 | -0.80 | 3.20E-01 | 8.35E-01 |
| FAM177B    | 1.55  | 3.58E-01 | 1.00E+00 | 0.77  | 3.20E-01 | 8.36E-01 |
| TRMT112P6  | -0.20 | 9.53E-01 | 1.00E+00 | -0.74 | 3.20E-01 | 8.36E-01 |
| AC009226.1 | 0.33  | 7.98E-01 | 1.00E+00 | 0.59  | 3.20E-01 | 8.36E-01 |
| AC139491.5 | 0.63  | 6.96E-01 | 1.00E+00 | 1.59  | 3.20E-01 | 8.36E-01 |
| MMP8       | 3.60  | 2.65E-01 | 1.00E+00 | -1.27 | 3.20E-01 | 8.36E-01 |
| ELK4       | 0.01  | 9.69E-01 | 1.00E+00 | 0.22  | 3.20E-01 | 8.36E-01 |
| LINC02345  | -0.28 | 6.83E-01 | 1.00E+00 | -0.59 | 3.20E-01 | 8.36E-01 |
| ICAM2      | 0.14  | 7.70E-01 | 1.00E+00 | 0.47  | 3.21E-01 | 8.36E-01 |
| NDUFB2-AS1 | -0.56 | 7.02E-01 | 1.00E+00 | -0.67 | 3.21E-01 | 8.36E-01 |
| C3         | 0.62  | 1.49E-01 | 1.00E+00 | 0.67  | 3.21E-01 | 8.36E-01 |
| DNAJC19P5  | -1.44 | 5.34E-02 | 1.00E+00 | 1.30  | 3.21E-01 | 8.36E-01 |
| TNRC6C     | -0.25 | 4.58E-01 | 1.00E+00 | 0.46  | 3.21E-01 | 8.36E-01 |
| LINC00840  | -1.00 | 2.22E-01 | 1.00E+00 | -0.80 | 3.21E-01 | 8.36E-01 |
| G42332     | -1.46 | 2.24E-01 | 1.00E+00 | 1.20  | 3.21E-01 | 8.36E-01 |
| LINC02334  | -1.30 | 7.06E-01 | 1.00E+00 | -1.20 | 3.21E-01 | 8.36E-01 |
| SATB1      | 0.29  | 2.08E-01 | 1.00E+00 | 0.28  | 3.21E-01 | 8.36E-01 |
| LRRFIP1P1  | -2.17 | 3.99E-02 | 1.00E+00 | 0.57  | 3.21E-01 | 8.36E-01 |
| AC008840.1 | 0.46  | 8.93E-01 | 1.00E+00 | -1.69 | 3.21E-01 | 8.36E-01 |
| CDC40      | 0.15  | 5.19E-01 | 1.00E+00 | 0.18  | 3.21E-01 | 8.36E-01 |

|                   |       |          |          |       |          |          |
|-------------------|-------|----------|----------|-------|----------|----------|
| <b>AC079921.1</b> | -2.39 | 8.56E-02 | 1.00E+00 | -1.21 | 3.21E-01 | 8.36E-01 |
| <b>MOSMO</b>      | 0.46  | 1.36E-01 | 1.00E+00 | -0.30 | 3.21E-01 | 8.36E-01 |
| <b>SH3BGRL2</b>   | 0.67  | 1.59E-01 | 1.00E+00 | -0.36 | 3.21E-01 | 8.36E-01 |
| <b>CXCL13</b>     | -4.09 | 1.68E-01 | 1.00E+00 | 3.12  | 3.21E-01 | 8.36E-01 |
| <b>AC114284.1</b> | -1.52 | 4.85E-01 | 1.00E+00 | 1.31  | 3.21E-01 | 8.36E-01 |
| <b>IRAK4</b>      | -0.01 | 9.74E-01 | 1.00E+00 | 0.24  | 3.21E-01 | 8.36E-01 |
| <b>ZNF599</b>     | 0.05  | 8.14E-01 | 1.00E+00 | -0.41 | 3.21E-01 | 8.36E-01 |
| <b>ELK3</b>       | 0.03  | 9.16E-01 | 1.00E+00 | 0.39  | 3.21E-01 | 8.36E-01 |
| <b>AC010320.1</b> | -0.03 | 9.85E-01 | 1.00E+00 | 1.16  | 3.21E-01 | 8.36E-01 |
| <b>AC011477.3</b> | 1.47  | 1.57E-01 | 1.00E+00 | 0.71  | 3.21E-01 | 8.36E-01 |
| <b>IGLV1-47</b>   | 7.45  | 2.69E-04 | 6.07E-02 | 3.12  | 3.21E-01 | 8.36E-01 |
| <b>KCNIP3</b>     | 0.39  | 4.06E-01 | 1.00E+00 | 0.50  | 3.21E-01 | 8.36E-01 |
| <b>FAM193A</b>    | -0.29 | 2.08E-01 | 1.00E+00 | 0.43  | 3.21E-01 | 8.36E-01 |
| <b>TEX30</b>      | 0.38  | 2.61E-01 | 1.00E+00 | -0.41 | 3.21E-01 | 8.36E-01 |
| <b>LRRC8D</b>     | -0.26 | 3.69E-01 | 1.00E+00 | 0.39  | 3.21E-01 | 8.36E-01 |
| <b>TSKU</b>       | -0.16 | 4.49E-01 | 1.00E+00 | -0.30 | 3.21E-01 | 8.36E-01 |
| <b>LRRC43</b>     | -1.22 | 6.45E-02 | 1.00E+00 | 0.62  | 3.22E-01 | 8.36E-01 |
| <b>MRC1L1</b>     | 0.14  | 8.32E-01 | 1.00E+00 | 0.68  | 3.22E-01 | 8.36E-01 |
| <b>RPSAP61</b>    | -2.28 | 5.05E-01 | 1.00E+00 | -0.89 | 3.22E-01 | 8.36E-01 |
| <b>MIEN1</b>      | 0.08  | 7.10E-01 | 1.00E+00 | -0.38 | 3.22E-01 | 8.36E-01 |
| <b>SMARCA5</b>    | 0.17  | 5.42E-01 | 1.00E+00 | 0.22  | 3.22E-01 | 8.36E-01 |
| <b>AC005180.1</b> | 0.05  | 9.60E-01 | 1.00E+00 | 0.96  | 3.22E-01 | 8.36E-01 |
| <b>LMNA</b>       | -0.32 | 2.41E-01 | 1.00E+00 | 0.23  | 3.22E-01 | 8.36E-01 |
| <b>GCNT3</b>      | 0.23  | 9.18E-01 | 1.00E+00 | 1.57  | 3.22E-01 | 8.36E-01 |
| <b>ASNS</b>       | -0.24 | 5.13E-01 | 1.00E+00 | -0.19 | 3.22E-01 | 8.36E-01 |
| <b>UNC5A</b>      | -0.91 | 3.79E-01 | 1.00E+00 | 1.57  | 3.22E-01 | 8.36E-01 |
| <b>SNHG26</b>     | -0.49 | 3.42E-01 | 1.00E+00 | 0.62  | 3.22E-01 | 8.36E-01 |
| <b>NUDT14</b>     | -0.11 | 7.05E-01 | 1.00E+00 | 0.26  | 3.22E-01 | 8.36E-01 |
| <b>CHEK2</b>      | -0.18 | 5.25E-01 | 1.00E+00 | 0.26  | 3.22E-01 | 8.36E-01 |
| <b>ZNF17</b>      | -0.20 | 5.26E-01 | 1.00E+00 | 0.28  | 3.22E-01 | 8.36E-01 |
| <b>SLC2A6</b>     | -0.08 | 8.89E-01 | 1.00E+00 | 0.94  | 3.22E-01 | 8.36E-01 |
| <b>SPATA12</b>    | -0.64 | 5.47E-01 | 1.00E+00 | 0.93  | 3.22E-01 | 8.36E-01 |

|                    |       |          |          |       |          |          |
|--------------------|-------|----------|----------|-------|----------|----------|
| <b>AC002064.2</b>  | 3.45  | 8.10E-02 | 1.00E+00 | 1.56  | 3.22E-01 | 8.36E-01 |
| <b>ALKBH3</b>      | -0.11 | 4.97E-01 | 1.00E+00 | -0.21 | 3.22E-01 | 8.36E-01 |
| <b>PCMT1</b>       | 0.02  | 9.04E-01 | 1.00E+00 | -0.33 | 3.22E-01 | 8.36E-01 |
| <b>HTATIP2</b>     | 0.05  | 8.35E-01 | 1.00E+00 | -0.28 | 3.22E-01 | 8.36E-01 |
| <b>PARP4</b>       | 0.05  | 8.25E-01 | 1.00E+00 | 0.34  | 3.22E-01 | 8.36E-01 |
| <b>LINC00475</b>   | -0.72 | 4.36E-01 | 1.00E+00 | -0.80 | 3.22E-01 | 8.36E-01 |
| <b>POLR2A</b>      | -0.48 | 3.31E-02 | 1.00E+00 | 0.45  | 3.22E-01 | 8.36E-01 |
| <b>PLCL2</b>       | 0.42  | 2.16E-01 | 1.00E+00 | 0.73  | 3.22E-01 | 8.36E-01 |
| <b>TRGV2</b>       | -1.03 | 7.60E-01 | 1.00E+00 | 1.55  | 3.22E-01 | 8.36E-01 |
| <b>NANP</b>        | 0.15  | 5.03E-01 | 1.00E+00 | -0.29 | 3.23E-01 | 8.36E-01 |
| <b>DPP9</b>        | -0.14 | 5.44E-01 | 1.00E+00 | 0.47  | 3.23E-01 | 8.36E-01 |
| <b>GANAB</b>       | -0.09 | 6.44E-01 | 1.00E+00 | 0.39  | 3.23E-01 | 8.36E-01 |
| <b>SLC25A51</b>    | 0.30  | 2.90E-01 | 1.00E+00 | -0.37 | 3.23E-01 | 8.36E-01 |
| <b>CLEC17A</b>     | -2.98 | 3.79E-01 | 1.00E+00 | -1.67 | 3.23E-01 | 8.36E-01 |
| <b>TUBA8</b>       | -0.55 | 7.21E-01 | 1.00E+00 | 1.05  | 3.23E-01 | 8.37E-01 |
| <b>TP53TG1</b>     | 0.02  | 9.03E-01 | 1.00E+00 | -0.35 | 3.23E-01 | 8.37E-01 |
| <b>SENP6</b>       | -0.04 | 8.62E-01 | 1.00E+00 | -0.26 | 3.23E-01 | 8.37E-01 |
| <b>DNTTIP2</b>     | -0.18 | 3.38E-01 | 1.00E+00 | -0.27 | 3.23E-01 | 8.37E-01 |
| <b>TFAP4</b>       | -0.05 | 8.44E-01 | 1.00E+00 | 0.39  | 3.23E-01 | 8.37E-01 |
| <b>MRPS26</b>      | 0.03  | 8.87E-01 | 1.00E+00 | -0.20 | 3.23E-01 | 8.37E-01 |
| <b>CYP2T1P</b>     | -0.19 | 5.92E-01 | 1.00E+00 | 0.34  | 3.23E-01 | 8.37E-01 |
| <b>CNOT6</b>       | 0.18  | 4.92E-01 | 1.00E+00 | 0.37  | 3.23E-01 | 8.37E-01 |
| <b>MAP3K14-AS1</b> | -0.95 | 4.99E-02 | 1.00E+00 | -0.54 | 3.23E-01 | 8.37E-01 |
| <b>SIN3A</b>       | -0.10 | 5.97E-01 | 1.00E+00 | 0.29  | 3.23E-01 | 8.37E-01 |
| <b>AL162386.2</b>  | 0.26  | 9.20E-01 | 1.00E+00 | -1.29 | 3.23E-01 | 8.37E-01 |
| <b>HUS1B</b>       | -1.73 | 7.69E-02 | 1.00E+00 | -0.76 | 3.23E-01 | 8.37E-01 |
| <b>IDO2</b>        | 1.44  | 4.12E-01 | 1.00E+00 | -1.60 | 3.23E-01 | 8.37E-01 |
| <b>TSNARE1</b>     | -0.55 | 9.84E-02 | 1.00E+00 | -0.50 | 3.23E-01 | 8.37E-01 |
| <b>ZNF443</b>      | 0.29  | 5.81E-01 | 1.00E+00 | -0.34 | 3.23E-01 | 8.37E-01 |
| <b>AC012676.3</b>  | -3.46 | 1.96E-01 | 1.00E+00 | -1.15 | 3.23E-01 | 8.37E-01 |
| <b>KCTD14</b>      | -1.93 | 1.04E-01 | 1.00E+00 | -0.53 | 3.23E-01 | 8.37E-01 |
| <b>NPC2</b>        | -0.08 | 7.15E-01 | 1.00E+00 | 0.26  | 3.23E-01 | 8.37E-01 |

|                   |       |          |          |       |          |          |
|-------------------|-------|----------|----------|-------|----------|----------|
| <b>OSTF1</b>      | 0.08  | 7.21E-01 | 1.00E+00 | -0.16 | 3.23E-01 | 8.37E-01 |
| <b>FKBP7</b>      | 0.12  | 7.45E-01 | 1.00E+00 | 0.34  | 3.23E-01 | 8.37E-01 |
| <b>HIP1</b>       | -0.12 | 5.72E-01 | 1.00E+00 | 0.35  | 3.23E-01 | 8.37E-01 |
| <b>RBBP7</b>      | 0.02  | 9.32E-01 | 1.00E+00 | -0.26 | 3.24E-01 | 8.37E-01 |
| <b>CINP</b>       | -0.01 | 9.47E-01 | 1.00E+00 | 0.16  | 3.24E-01 | 8.37E-01 |
| <b>ZNRD1</b>      | 0.36  | 2.73E-01 | 1.00E+00 | -0.25 | 3.24E-01 | 8.37E-01 |
| <b>MAGI1-IT1</b>  | 0.24  | 8.00E-01 | 1.00E+00 | -0.94 | 3.24E-01 | 8.37E-01 |
| <b>RPL21P119</b>  | -0.24 | 7.42E-01 | 1.00E+00 | -0.56 | 3.24E-01 | 8.37E-01 |
| <b>WNT10B</b>     | -0.15 | 7.90E-01 | 1.00E+00 | -0.42 | 3.24E-01 | 8.37E-01 |
| <b>UQCRFS1P1</b>  | -0.69 | 1.42E-01 | 1.00E+00 | 0.38  | 3.24E-01 | 8.37E-01 |
| <b>TRPM1</b>      | -0.26 | 7.08E-01 | 1.00E+00 | 0.63  | 3.24E-01 | 8.37E-01 |
| <b>SWAP70</b>     | 0.33  | 1.06E-01 | 1.00E+00 | -0.19 | 3.24E-01 | 8.37E-01 |
| <b>EXOSC5</b>     | 0.00  | 9.89E-01 | 1.00E+00 | 0.22  | 3.24E-01 | 8.37E-01 |
| <b>TM4SF19</b>    | -2.37 | 4.86E-01 | 1.00E+00 | 1.21  | 3.24E-01 | 8.37E-01 |
| <b>ZNF776</b>     | 0.07  | 7.32E-01 | 1.00E+00 | -0.26 | 3.24E-01 | 8.37E-01 |
| <b>TMEM132B</b>   | 0.02  | 9.51E-01 | 1.00E+00 | -0.53 | 3.24E-01 | 8.38E-01 |
| <b>FABP5P2</b>    | 0.24  | 8.98E-01 | 1.00E+00 | 0.54  | 3.24E-01 | 8.38E-01 |
| <b>BLOC1S4</b>    | -0.24 | 3.71E-01 | 1.00E+00 | -0.57 | 3.24E-01 | 8.38E-01 |
| <b>PHF20L1</b>    | 0.11  | 5.71E-01 | 1.00E+00 | -0.25 | 3.24E-01 | 8.38E-01 |
| <b>ARGLU1</b>     | -0.19 | 5.08E-01 | 1.00E+00 | 0.18  | 3.24E-01 | 8.38E-01 |
| <b>MEPCE</b>      | -0.20 | 2.13E-01 | 1.00E+00 | 0.43  | 3.24E-01 | 8.38E-01 |
| <b>DCHS2</b>      | 0.16  | 7.65E-01 | 1.00E+00 | 0.82  | 3.25E-01 | 8.38E-01 |
| <b>PARP12</b>     | -0.10 | 8.45E-01 | 1.00E+00 | 0.65  | 3.25E-01 | 8.38E-01 |
| <b>BMP7</b>       | -0.02 | 9.71E-01 | 1.00E+00 | -0.48 | 3.25E-01 | 8.38E-01 |
| <b>PEG13</b>      | -0.54 | 3.59E-01 | 1.00E+00 | 0.97  | 3.25E-01 | 8.38E-01 |
| <b>ZNF718</b>     | 0.39  | 6.09E-01 | 1.00E+00 | -0.45 | 3.25E-01 | 8.38E-01 |
| <b>NSDHL</b>      | -0.28 | 3.31E-01 | 1.00E+00 | -0.14 | 3.25E-01 | 8.38E-01 |
| <b>MAST2</b>      | -0.28 | 3.43E-01 | 1.00E+00 | 0.53  | 3.25E-01 | 8.38E-01 |
| <b>MED18</b>      | -0.21 | 3.56E-01 | 1.00E+00 | 0.34  | 3.25E-01 | 8.38E-01 |
| <b>SDAD1</b>      | -0.03 | 8.59E-01 | 1.00E+00 | -0.20 | 3.25E-01 | 8.38E-01 |
| <b>CSF2</b>       | -0.32 | 8.80E-01 | 1.00E+00 | 1.07  | 3.25E-01 | 8.38E-01 |
| <b>AL365436.1</b> | -2.12 | 3.51E-01 | 1.00E+00 | -1.00 | 3.25E-01 | 8.38E-01 |

|            |       |          |          |       |          |          |
|------------|-------|----------|----------|-------|----------|----------|
| EFHC2      | 0.16  | 7.50E-01 | 1.00E+00 | -0.60 | 3.25E-01 | 8.38E-01 |
| G25089     | 0.39  | 7.17E-01 | 1.00E+00 | -0.86 | 3.25E-01 | 8.39E-01 |
| G5146      | 0.49  | 3.92E-01 | 1.00E+00 | 0.63  | 3.25E-01 | 8.39E-01 |
| AC007318.1 | 0.37  | 4.83E-01 | 1.00E+00 | -0.39 | 3.25E-01 | 8.39E-01 |
| IMP3       | 0.03  | 9.03E-01 | 1.00E+00 | -0.37 | 3.25E-01 | 8.39E-01 |
| POU3F3     | -0.62 | 3.73E-01 | 1.00E+00 | -0.81 | 3.26E-01 | 8.39E-01 |
| ANKS1A     | 0.05  | 8.06E-01 | 1.00E+00 | 0.30  | 3.26E-01 | 8.39E-01 |
| PDLIM1     | -0.16 | 4.58E-01 | 1.00E+00 | 0.15  | 3.26E-01 | 8.39E-01 |
| MDFIC      | 0.37  | 1.22E-01 | 1.00E+00 | -0.52 | 3.26E-01 | 8.39E-01 |
| KDM1B      | -0.06 | 8.54E-01 | 1.00E+00 | 0.44  | 3.26E-01 | 8.39E-01 |
| NME3       | -0.05 | 8.18E-01 | 1.00E+00 | 0.21  | 3.26E-01 | 8.39E-01 |
| EHP1       | 0.14  | 7.18E-01 | 1.00E+00 | -0.31 | 3.26E-01 | 8.39E-01 |
| SLC6A20    | -0.41 | 5.74E-01 | 1.00E+00 | 1.20  | 3.26E-01 | 8.39E-01 |
| ZNF14      | 0.40  | 3.53E-01 | 1.00E+00 | -0.37 | 3.26E-01 | 8.39E-01 |
| CXXC1      | -0.16 | 4.83E-01 | 1.00E+00 | 0.30  | 3.26E-01 | 8.39E-01 |
| RPL35P1    | 0.87  | 7.38E-01 | 1.00E+00 | -0.85 | 3.26E-01 | 8.39E-01 |
| CPSF7      | -0.46 | 6.76E-02 | 1.00E+00 | 0.24  | 3.26E-01 | 8.39E-01 |
| RUNX3      | -0.62 | 6.53E-02 | 1.00E+00 | 0.57  | 3.26E-01 | 8.39E-01 |
| RASSF10    | -0.25 | 3.65E-01 | 1.00E+00 | 0.75  | 3.26E-01 | 8.39E-01 |
| PTCD3      | 0.11  | 5.71E-01 | 1.00E+00 | -0.21 | 3.26E-01 | 8.40E-01 |
| FAM27A     | -0.66 | 4.31E-01 | 1.00E+00 | -0.65 | 3.26E-01 | 8.40E-01 |
| ADGRA3     | -0.02 | 9.48E-01 | 1.00E+00 | -0.46 | 3.26E-01 | 8.40E-01 |
| GABRQ      | -0.53 | 2.89E-01 | 1.00E+00 | 0.80  | 3.26E-01 | 8.40E-01 |
| PSTPIP2    | 0.04  | 9.14E-01 | 1.00E+00 | 0.36  | 3.26E-01 | 8.40E-01 |
| ENG        | -0.33 | 3.77E-01 | 1.00E+00 | 0.55  | 3.27E-01 | 8.40E-01 |
| SIMC1      | -0.22 | 4.62E-01 | 1.00E+00 | -0.62 | 3.27E-01 | 8.40E-01 |
| CFAP46     | 0.25  | 7.63E-01 | 1.00E+00 | 0.87  | 3.27E-01 | 8.40E-01 |
| AC099548.2 | -0.07 | 9.35E-01 | 1.00E+00 | 0.48  | 3.27E-01 | 8.40E-01 |
| G37023     | -0.46 | 7.83E-01 | 1.00E+00 | 1.41  | 3.27E-01 | 8.40E-01 |
| AQP7       | 3.43  | 1.03E-02 | 6.32E-01 | -0.84 | 3.27E-01 | 8.40E-01 |
| SYCE3      | 0.84  | 4.32E-01 | 1.00E+00 | -0.65 | 3.27E-01 | 8.40E-01 |
| HABP4      | 0.01  | 9.80E-01 | 1.00E+00 | -0.65 | 3.27E-01 | 8.40E-01 |

|                    |       |          |          |       |          |          |
|--------------------|-------|----------|----------|-------|----------|----------|
| <b>EPS15</b>       | 0.05  | 7.81E-01 | 1.00E+00 | -0.17 | 3.27E-01 | 8.40E-01 |
| <b>LINC00506</b>   | -0.07 | 9.58E-01 | 1.00E+00 | 1.09  | 3.27E-01 | 8.40E-01 |
| <b>ORAI3</b>       | 0.34  | 2.57E-01 | 1.00E+00 | -0.34 | 3.27E-01 | 8.40E-01 |
| <b>GOLGA4</b>      | -0.31 | 2.82E-01 | 1.00E+00 | -0.29 | 3.27E-01 | 8.40E-01 |
| <b>AC022898.2</b>  | -0.54 | 8.75E-01 | 1.00E+00 | -1.74 | 3.27E-01 | 8.40E-01 |
| <b>JADE1</b>       | 0.16  | 3.79E-01 | 1.00E+00 | -0.32 | 3.27E-01 | 8.40E-01 |
| <b>GINS1</b>       | -0.28 | 4.07E-01 | 1.00E+00 | 0.47  | 3.27E-01 | 8.40E-01 |
| <b>RIOK3</b>       | 0.07  | 7.44E-01 | 1.00E+00 | -0.17 | 3.27E-01 | 8.40E-01 |
| <b>SFRP1</b>       | 0.88  | 2.41E-01 | 1.00E+00 | 0.55  | 3.27E-01 | 8.40E-01 |
| <b>ZP1</b>         | 0.63  | 6.52E-01 | 1.00E+00 | -1.13 | 3.27E-01 | 8.40E-01 |
| <b>XLOC_002440</b> | -2.37 | 2.36E-01 | 1.00E+00 | 0.91  | 3.27E-01 | 8.40E-01 |
| <b>FGF13</b>       | -0.10 | 8.84E-01 | 1.00E+00 | -0.62 | 3.27E-01 | 8.40E-01 |
| <b>ARMC6</b>       | -0.19 | 4.39E-01 | 1.00E+00 | 0.32  | 3.27E-01 | 8.40E-01 |
| <b>RRP9</b>        | -0.16 | 5.11E-01 | 1.00E+00 | 0.24  | 3.27E-01 | 8.40E-01 |
| <b>SRPX2</b>       | 1.74  | 1.32E-02 | 7.22E-01 | 0.62  | 3.27E-01 | 8.40E-01 |
| <b>CLEC4G</b>      | 0.61  | 3.19E-01 | 1.00E+00 | 0.81  | 3.27E-01 | 8.40E-01 |
| <b>AC004148.2</b>  | 0.48  | 7.39E-01 | 1.00E+00 | 1.14  | 3.28E-01 | 8.40E-01 |
| <b>MOB3C</b>       | 0.32  | 3.54E-01 | 1.00E+00 | 0.47  | 3.28E-01 | 8.40E-01 |
| <b>AC138150.2</b>  | 0.43  | 7.36E-01 | 1.00E+00 | 0.74  | 3.28E-01 | 8.40E-01 |
| <b>PTEN</b>        | 0.03  | 8.81E-01 | 1.00E+00 | -0.47 | 3.28E-01 | 8.40E-01 |
| <b>KIAA1109</b>    | -0.10 | 6.32E-01 | 1.00E+00 | 0.35  | 3.28E-01 | 8.40E-01 |
| <b>NKAPL</b>       | 0.37  | 5.02E-01 | 1.00E+00 | -0.42 | 3.28E-01 | 8.40E-01 |
| <b>CNNM1</b>       | -0.87 | 9.35E-04 | 1.56E-01 | -0.51 | 3.28E-01 | 8.40E-01 |
| <b>FAM19A3</b>     | -2.10 | 7.63E-02 | 1.00E+00 | 1.07  | 3.28E-01 | 8.40E-01 |
| <b>CCM2</b>        | -0.12 | 5.72E-01 | 1.00E+00 | 0.48  | 3.28E-01 | 8.40E-01 |
| <b>LINC01278</b>   | -0.03 | 9.43E-01 | 1.00E+00 | -0.20 | 3.28E-01 | 8.40E-01 |
| <b>CCDC32</b>      | 0.36  | 2.52E-01 | 1.00E+00 | 0.30  | 3.28E-01 | 8.40E-01 |
| <b>KRT87P</b>      | 1.08  | 5.66E-01 | 1.00E+00 | -1.39 | 3.28E-01 | 8.40E-01 |
| <b>TAL1</b>        | 0.51  | 2.81E-01 | 1.00E+00 | 0.79  | 3.28E-01 | 8.40E-01 |
| <b>CXXC4</b>       | -0.23 | 8.42E-01 | 1.00E+00 | -0.63 | 3.28E-01 | 8.40E-01 |
| <b>ZNF343</b>      | 0.13  | 5.99E-01 | 1.00E+00 | 0.25  | 3.28E-01 | 8.40E-01 |
| <b>AL031667.3</b>  | -1.72 | 1.23E-01 | 1.00E+00 | 0.80  | 3.28E-01 | 8.40E-01 |



|             |       |          |          |       |          |          |
|-------------|-------|----------|----------|-------|----------|----------|
| INIP        | 0.26  | 1.94E-01 | 1.00E+00 | -0.30 | 3.28E-01 | 8.40E-01 |
| MDC1        | -0.48 | 1.65E-02 | 8.08E-01 | 0.38  | 3.28E-01 | 8.40E-01 |
| TREML1      | -0.76 | 6.24E-01 | 1.00E+00 | 0.88  | 3.28E-01 | 8.41E-01 |
| XLOC_012736 | -0.12 | 8.96E-01 | 1.00E+00 | 0.94  | 3.29E-01 | 8.41E-01 |
| AP002847.1  | 1.04  | 5.04E-01 | 1.00E+00 | 1.20  | 3.29E-01 | 8.41E-01 |
| RARA-AS1    | -0.75 | 3.56E-01 | 1.00E+00 | -0.88 | 3.29E-01 | 8.41E-01 |
| VPS36       | 0.10  | 7.19E-01 | 1.00E+00 | -0.25 | 3.29E-01 | 8.41E-01 |
| TRMT5       | 0.02  | 9.42E-01 | 1.00E+00 | 0.19  | 3.29E-01 | 8.41E-01 |
| ZRANB2      | 0.10  | 7.00E-01 | 1.00E+00 | -0.34 | 3.29E-01 | 8.41E-01 |
| MRPL18      | 0.04  | 7.87E-01 | 1.00E+00 | -0.24 | 3.29E-01 | 8.41E-01 |
| MAGOHB      | -0.07 | 7.35E-01 | 1.00E+00 | -0.28 | 3.29E-01 | 8.41E-01 |
| CCDC8       | 0.02  | 9.76E-01 | 1.00E+00 | 0.63  | 3.29E-01 | 8.41E-01 |
| RAB40C      | -0.28 | 5.11E-01 | 1.00E+00 | -0.39 | 3.29E-01 | 8.41E-01 |
| LYPD5       | -0.18 | 7.53E-01 | 1.00E+00 | 0.47  | 3.29E-01 | 8.41E-01 |
| PDCD6       | 0.19  | 2.31E-01 | 1.00E+00 | -0.36 | 3.29E-01 | 8.41E-01 |
| NCAM2       | -0.12 | 7.25E-01 | 1.00E+00 | 0.78  | 3.29E-01 | 8.41E-01 |
| NAXD        | 0.16  | 3.16E-01 | 1.00E+00 | -0.17 | 3.29E-01 | 8.41E-01 |
| AC138409.1  | 1.84  | 2.01E-01 | 1.00E+00 | -0.67 | 3.29E-01 | 8.41E-01 |
| AL356215.1  | -0.57 | 3.66E-01 | 1.00E+00 | -1.00 | 3.29E-01 | 8.41E-01 |
| ITGA2B      | -0.07 | 9.25E-01 | 1.00E+00 | -1.01 | 3.29E-01 | 8.41E-01 |
| G21034      | 2.37  | 2.58E-01 | 1.00E+00 | 1.86  | 3.29E-01 | 8.42E-01 |
| CTAGE8      | 0.84  | 9.84E-02 | 1.00E+00 | 0.81  | 3.29E-01 | 8.42E-01 |
| GAPDHP49    | 0.01  | 9.90E-01 | 1.00E+00 | -0.78 | 3.29E-01 | 8.42E-01 |
| SKOR1       | -0.99 | 1.37E-01 | 1.00E+00 | 1.22  | 3.29E-01 | 8.42E-01 |
| RALGAPA2    | 0.28  | 1.73E-01 | 1.00E+00 | 0.33  | 3.29E-01 | 8.42E-01 |
| AL157935.1  | -0.20 | 7.79E-01 | 1.00E+00 | 0.87  | 3.30E-01 | 8.42E-01 |
| LAMB2       | 0.23  | 5.29E-01 | 1.00E+00 | 0.54  | 3.30E-01 | 8.42E-01 |
| RPL23AP82   | 0.12  | 6.20E-01 | 1.00E+00 | -0.25 | 3.30E-01 | 8.42E-01 |
| XLOC_006333 | -2.73 | 2.21E-01 | 1.00E+00 | -1.31 | 3.30E-01 | 8.42E-01 |
| TMEM50B     | 0.26  | 3.42E-01 | 1.00E+00 | -0.34 | 3.30E-01 | 8.42E-01 |
| XLOC_007725 | 1.39  | 1.80E-01 | 1.00E+00 | -0.97 | 3.30E-01 | 8.42E-01 |
| PPP2R1A     | -0.20 | 3.19E-01 | 1.00E+00 | 0.11  | 3.30E-01 | 8.42E-01 |

|             |       |          |          |       |          |          |
|-------------|-------|----------|----------|-------|----------|----------|
| KCNA1       | -1.11 | 3.70E-01 | 1.00E+00 | 1.35  | 3.30E-01 | 8.42E-01 |
| BLVRA       | -0.12 | 5.25E-01 | 1.00E+00 | 0.17  | 3.30E-01 | 8.42E-01 |
| FAM13A      | 0.39  | 3.91E-01 | 1.00E+00 | -0.31 | 3.30E-01 | 8.42E-01 |
| CYBA        | 0.10  | 7.67E-01 | 1.00E+00 | 0.92  | 3.30E-01 | 8.42E-01 |
| PPP6R3      | -0.01 | 9.56E-01 | 1.00E+00 | 0.17  | 3.30E-01 | 8.42E-01 |
| TDG         | 0.14  | 6.17E-01 | 1.00E+00 | 0.20  | 3.30E-01 | 8.42E-01 |
| MT-TT       | NA    | NA       | NA       | -0.80 | 3.30E-01 | 8.42E-01 |
| LRRC73      | -0.46 | 5.19E-01 | 1.00E+00 | 1.09  | 3.30E-01 | 8.42E-01 |
| AC068888.1  | 0.33  | 5.04E-01 | 1.00E+00 | -0.45 | 3.30E-01 | 8.42E-01 |
| MYLPF       | -1.31 | 9.45E-02 | 1.00E+00 | -0.54 | 3.30E-01 | 8.42E-01 |
| AC100861.1  | -0.23 | 6.83E-01 | 1.00E+00 | 0.33  | 3.30E-01 | 8.42E-01 |
| CACNA2D3    | -0.52 | 3.70E-01 | 1.00E+00 | 0.79  | 3.30E-01 | 8.42E-01 |
| PGRMC1      | 0.09  | 6.46E-01 | 1.00E+00 | -0.20 | 3.31E-01 | 8.42E-01 |
| AC103810.2  | -1.29 | 5.81E-01 | 1.00E+00 | -0.84 | 3.31E-01 | 8.42E-01 |
| MZT1        | 0.36  | 4.16E-01 | 1.00E+00 | -0.33 | 3.31E-01 | 8.42E-01 |
| IFT57       | -0.10 | 6.89E-01 | 1.00E+00 | -0.23 | 3.31E-01 | 8.42E-01 |
| NMD3        | 0.07  | 7.41E-01 | 1.00E+00 | -0.25 | 3.31E-01 | 8.42E-01 |
| ELL2        | -0.09 | 8.06E-01 | 1.00E+00 | 0.31  | 3.31E-01 | 8.42E-01 |
| HSD11B1L    | -0.87 | 3.74E-02 | 1.00E+00 | -0.46 | 3.31E-01 | 8.42E-01 |
| EIF6        | -0.07 | 8.00E-01 | 1.00E+00 | 0.33  | 3.31E-01 | 8.42E-01 |
| LY75        | 0.00  | 1.00E+00 | 1.00E+00 | -0.30 | 3.31E-01 | 8.42E-01 |
| BX571818.1  | -0.07 | 9.46E-01 | 1.00E+00 | 1.01  | 3.31E-01 | 8.42E-01 |
| CCZ1B       | 0.00  | 9.91E-01 | 1.00E+00 | -0.51 | 3.31E-01 | 8.42E-01 |
| DHX8        | -0.22 | 3.05E-01 | 1.00E+00 | 0.27  | 3.31E-01 | 8.42E-01 |
| ATP5F1D     | -0.33 | 1.55E-01 | 1.00E+00 | -0.18 | 3.31E-01 | 8.42E-01 |
| AWAT2       | 0.27  | 9.32E-01 | 1.00E+00 | -3.05 | 3.31E-01 | 8.42E-01 |
| XLOC_013541 | -1.53 | 1.42E-01 | 1.00E+00 | 1.12  | 3.31E-01 | 8.42E-01 |
| AC011374.2  | 0.39  | 5.54E-01 | 1.00E+00 | -0.52 | 3.31E-01 | 8.42E-01 |
| SMOC1       | 0.63  | 3.70E-01 | 1.00E+00 | 0.75  | 3.31E-01 | 8.42E-01 |
| KLHL35      | -0.20 | 7.38E-01 | 1.00E+00 | -0.45 | 3.31E-01 | 8.42E-01 |
| ASAH2       | -0.69 | 4.42E-01 | 1.00E+00 | -0.61 | 3.31E-01 | 8.42E-01 |
| SLC16A11    | 0.10  | 7.96E-01 | 1.00E+00 | -0.51 | 3.31E-01 | 8.42E-01 |

|            |       |          |          |       |          |          |
|------------|-------|----------|----------|-------|----------|----------|
| TOPORS     | -0.27 | 2.70E-01 | 1.00E+00 | -0.24 | 3.31E-01 | 8.42E-01 |
| PPIAP19    | -1.12 | 7.18E-01 | 1.00E+00 | 0.91  | 3.31E-01 | 8.42E-01 |
| AC015987.1 | 1.48  | 6.63E-01 | 1.00E+00 | -1.11 | 3.31E-01 | 8.42E-01 |
| MAN2A1     | 0.03  | 9.14E-01 | 1.00E+00 | 0.21  | 3.31E-01 | 8.42E-01 |
| ERCC6L     | 0.08  | 8.53E-01 | 1.00E+00 | 0.74  | 3.31E-01 | 8.42E-01 |
| PPP3R1     | 0.02  | 9.28E-01 | 1.00E+00 | 0.47  | 3.31E-01 | 8.42E-01 |
| ACVR2B     | 0.49  | 2.79E-01 | 1.00E+00 | 0.42  | 3.31E-01 | 8.42E-01 |
| TNPO1P1    | 0.90  | 7.96E-01 | 1.00E+00 | -1.48 | 3.31E-01 | 8.42E-01 |
| LINC00987  | -3.08 | 2.56E-02 | 9.30E-01 | -0.70 | 3.31E-01 | 8.42E-01 |
| PADI2      | 0.33  | 7.51E-01 | 1.00E+00 | -0.59 | 3.31E-01 | 8.42E-01 |
| PCDH7      | -0.34 | 3.47E-01 | 1.00E+00 | 0.38  | 3.31E-01 | 8.42E-01 |
| MARF1      | 0.40  | 8.96E-02 | 1.00E+00 | 0.33  | 3.31E-01 | 8.42E-01 |
| AC008555.2 | 2.97  | 2.26E-01 | 1.00E+00 | -0.54 | 3.31E-01 | 8.42E-01 |
| PPP1R26    | 0.13  | 7.07E-01 | 1.00E+00 | 0.69  | 3.32E-01 | 8.42E-01 |
| NMUR1      | 1.35  | 1.30E-01 | 1.00E+00 | -0.87 | 3.32E-01 | 8.42E-01 |
| AC010615.2 | 0.66  | 4.65E-01 | 1.00E+00 | -0.91 | 3.32E-01 | 8.42E-01 |
| TMED4      | 0.11  | 4.22E-01 | 1.00E+00 | -0.21 | 3.32E-01 | 8.42E-01 |
| ERMN       | -5.42 | 8.19E-09 | 3.93E-06 | 1.66  | 3.32E-01 | 8.42E-01 |
| MIR103A2   | 0.07  | 9.49E-01 | 1.00E+00 | 0.39  | 3.32E-01 | 8.42E-01 |
| WIPI1      | -0.07 | 8.29E-01 | 1.00E+00 | 0.27  | 3.32E-01 | 8.42E-01 |
| ZNF33A     | -0.07 | 7.96E-01 | 1.00E+00 | -0.26 | 3.32E-01 | 8.42E-01 |
| LINC01142  | -1.00 | 4.45E-01 | 1.00E+00 | 0.78  | 3.32E-01 | 8.42E-01 |
| KLF3-AS1   | -0.17 | 7.32E-01 | 1.00E+00 | -0.47 | 3.32E-01 | 8.42E-01 |
| AC063944.2 | -3.44 | 8.39E-02 | 1.00E+00 | 1.39  | 3.32E-01 | 8.42E-01 |
| C16orf74   | -0.47 | 3.54E-01 | 1.00E+00 | -0.38 | 3.32E-01 | 8.42E-01 |
| FXVD1      | -0.23 | 9.07E-01 | 1.00E+00 | 0.77  | 3.32E-01 | 8.42E-01 |
| AC244258.1 | -4.70 | 1.81E-02 | 8.45E-01 | -0.50 | 3.32E-01 | 8.42E-01 |
| SH2D5      | -4.10 | 4.07E-02 | 1.00E+00 | 3.07  | 3.32E-01 | 8.42E-01 |
| TRIM52     | 0.10  | 6.99E-01 | 1.00E+00 | -0.24 | 3.32E-01 | 8.42E-01 |
| BAHD1      | -0.06 | 8.04E-01 | 1.00E+00 | 0.46  | 3.32E-01 | 8.42E-01 |
| NUP210L    | -2.71 | 3.31E-01 | 1.00E+00 | -1.42 | 3.32E-01 | 8.42E-01 |
| Z97989.1   | -0.19 | 8.03E-01 | 1.00E+00 | 0.57  | 3.32E-01 | 8.42E-01 |

|                   |       |          |          |       |          |          |
|-------------------|-------|----------|----------|-------|----------|----------|
| <b>AL122023.1</b> | 1.81  | 5.80E-02 | 1.00E+00 | -0.92 | 3.32E-01 | 8.42E-01 |
| <b>AL035701.1</b> | -1.06 | 5.35E-01 | 1.00E+00 | -1.17 | 3.32E-01 | 8.42E-01 |
| <b>ANKRD26</b>    | -0.01 | 9.77E-01 | 1.00E+00 | -0.34 | 3.32E-01 | 8.43E-01 |
| <b>TTC37</b>      | 0.16  | 5.44E-01 | 1.00E+00 | -0.17 | 3.33E-01 | 8.43E-01 |
| <b>NTPCR</b>      | 0.11  | 5.31E-01 | 1.00E+00 | -0.28 | 3.33E-01 | 8.43E-01 |
| <b>ATG10</b>      | -0.14 | 6.22E-01 | 1.00E+00 | -0.27 | 3.33E-01 | 8.43E-01 |
| <b>ALDH4A1</b>    | 0.09  | 7.96E-01 | 1.00E+00 | -0.38 | 3.33E-01 | 8.43E-01 |
| <b>CARM1</b>      | -0.45 | 1.82E-02 | 8.48E-01 | 0.63  | 3.33E-01 | 8.43E-01 |
| <b>SLC25A29</b>   | -0.32 | 5.12E-01 | 1.00E+00 | -0.64 | 3.33E-01 | 8.43E-01 |
| <b>LTB4R</b>      | -0.05 | 8.85E-01 | 1.00E+00 | 0.57  | 3.33E-01 | 8.43E-01 |
| <b>CCDC93</b>     | 0.41  | 3.73E-01 | 1.00E+00 | 0.24  | 3.33E-01 | 8.43E-01 |
| <b>NSL1</b>       | -0.03 | 8.73E-01 | 1.00E+00 | -0.26 | 3.33E-01 | 8.43E-01 |
| <b>SLC7A14</b>    | -0.28 | 8.34E-01 | 1.00E+00 | -1.69 | 3.33E-01 | 8.43E-01 |
| <b>AP006296.1</b> | 1.17  | 5.98E-01 | 1.00E+00 | -0.84 | 3.33E-01 | 8.43E-01 |
| <b>TLE2</b>       | -0.07 | 8.95E-01 | 1.00E+00 | -0.61 | 3.33E-01 | 8.43E-01 |
| <b>H3F3C</b>      | -0.43 | 7.70E-01 | 1.00E+00 | -0.66 | 3.33E-01 | 8.43E-01 |
| <b>SPHK2</b>      | 0.03  | 9.45E-01 | 1.00E+00 | 0.63  | 3.33E-01 | 8.43E-01 |
| <b>SPSB3</b>      | 0.11  | 8.70E-01 | 1.00E+00 | 0.45  | 3.33E-01 | 8.43E-01 |
| <b>TRIM36</b>     | 0.12  | 8.37E-01 | 1.00E+00 | -0.68 | 3.33E-01 | 8.43E-01 |
| <b>AC103702.1</b> | 0.39  | 8.13E-01 | 1.00E+00 | -1.20 | 3.33E-01 | 8.43E-01 |
| <b>PARN</b>       | -0.08 | 6.28E-01 | 1.00E+00 | -0.16 | 3.33E-01 | 8.43E-01 |
| <b>HSPB3</b>      | 0.47  | 2.24E-01 | 1.00E+00 | 0.64  | 3.33E-01 | 8.43E-01 |
| <b>AC103770.1</b> | 0.35  | 9.19E-01 | 1.00E+00 | 1.48  | 3.33E-01 | 8.43E-01 |
| <b>RANBP10</b>    | -0.01 | 9.67E-01 | 1.00E+00 | 0.49  | 3.33E-01 | 8.43E-01 |
| <b>UBA2</b>       | 0.09  | 6.27E-01 | 1.00E+00 | -0.36 | 3.33E-01 | 8.43E-01 |
| <b>AC011815.1</b> | -0.74 | 7.36E-02 | 1.00E+00 | -0.56 | 3.33E-01 | 8.43E-01 |
| <b>OGFOD2</b>     | -0.13 | 9.59E-01 | 1.00E+00 | 0.62  | 3.33E-01 | 8.43E-01 |
| <b>TGFB111</b>    | -0.14 | 7.43E-01 | 1.00E+00 | 0.36  | 3.34E-01 | 8.44E-01 |
| <b>EXOC5P1</b>    | 1.26  | 6.84E-01 | 1.00E+00 | -0.68 | 3.34E-01 | 8.44E-01 |
| <b>VTN</b>        | -0.30 | 7.67E-01 | 1.00E+00 | 1.21  | 3.34E-01 | 8.44E-01 |
| <b>NEK11</b>      | 0.25  | 2.48E-01 | 1.00E+00 | 0.33  | 3.34E-01 | 8.44E-01 |
| <b>CADM4</b>      | -0.15 | 4.60E-01 | 1.00E+00 | 0.67  | 3.34E-01 | 8.44E-01 |

|                     |       |          |          |       |          |          |
|---------------------|-------|----------|----------|-------|----------|----------|
| <b>AL445423.1</b>   | 1.91  | 1.52E-01 | 1.00E+00 | 0.94  | 3.34E-01 | 8.44E-01 |
| <b>EEA1</b>         | -0.14 | 5.51E-01 | 1.00E+00 | -0.20 | 3.34E-01 | 8.44E-01 |
| <b>G33789</b>       | -0.26 | 7.03E-01 | 1.00E+00 | 1.17  | 3.34E-01 | 8.44E-01 |
| <b>AC022467.1</b>   | -0.19 | 9.37E-01 | 1.00E+00 | -1.66 | 3.34E-01 | 8.44E-01 |
| <b>DHX40</b>        | 0.07  | 7.28E-01 | 1.00E+00 | -0.50 | 3.34E-01 | 8.44E-01 |
| <b>G42509</b>       | 1.32  | 6.99E-01 | 1.00E+00 | 0.75  | 3.34E-01 | 8.45E-01 |
| <b>TRBV19</b>       | -3.21 | 4.06E-02 | 1.00E+00 | 0.93  | 3.34E-01 | 8.45E-01 |
| <b>CPLANE2</b>      | 0.20  | 5.34E-01 | 1.00E+00 | 0.69  | 3.35E-01 | 8.45E-01 |
| <b>TMC6</b>         | -0.19 | 4.76E-01 | 1.00E+00 | 0.51  | 3.35E-01 | 8.45E-01 |
| <b>PCLO</b>         | -1.44 | 1.45E-03 | 2.09E-01 | -0.47 | 3.35E-01 | 8.45E-01 |
| <b>IRX6</b>         | 0.37  | 4.82E-01 | 1.00E+00 | -0.47 | 3.35E-01 | 8.45E-01 |
| <b>AL353729.2</b>   | -1.19 | 7.32E-01 | 1.00E+00 | 1.23  | 3.35E-01 | 8.45E-01 |
| <b>NHEJ1</b>        | -1.41 | 6.33E-01 | 1.00E+00 | 0.98  | 3.35E-01 | 8.45E-01 |
| <b>MGAT4C</b>       | -0.54 | 6.52E-01 | 1.00E+00 | 0.82  | 3.35E-01 | 8.45E-01 |
| <b>TIMM22</b>       | -0.05 | 8.30E-01 | 1.00E+00 | -0.24 | 3.35E-01 | 8.45E-01 |
| <b>AC008124.1</b>   | 0.15  | 5.28E-01 | 1.00E+00 | -0.34 | 3.35E-01 | 8.45E-01 |
| <b>CYFIP2</b>       | -0.75 | 6.01E-02 | 1.00E+00 | 0.50  | 3.35E-01 | 8.45E-01 |
| <b>XLOC_009180</b>  | 1.03  | 5.76E-01 | 1.00E+00 | 1.08  | 3.35E-01 | 8.45E-01 |
| <b>MIS18A</b>       | 0.21  | 3.08E-01 | 1.00E+00 | -0.28 | 3.35E-01 | 8.45E-01 |
| <b>AL357054.1</b>   | -0.80 | 8.18E-01 | 1.00E+00 | 3.03  | 3.35E-01 | 8.45E-01 |
| <b>RIC3</b>         | -0.05 | 8.61E-01 | 1.00E+00 | -0.42 | 3.35E-01 | 8.45E-01 |
| <b>SAMD10</b>       | -0.28 | 3.71E-01 | 1.00E+00 | -0.35 | 3.35E-01 | 8.45E-01 |
| <b>LYNX1-SLURP2</b> | -0.59 | 6.86E-01 | 1.00E+00 | -0.59 | 3.35E-01 | 8.45E-01 |
| <b>XLOC_000411</b>  | 1.26  | 5.59E-02 | 1.00E+00 | -0.71 | 3.35E-01 | 8.45E-01 |
| <b>AP001046.1</b>   | -0.49 | 5.65E-01 | 1.00E+00 | 1.22  | 3.35E-01 | 8.45E-01 |
| <b>CCT6P1</b>       | -0.51 | 5.23E-01 | 1.00E+00 | -0.43 | 3.35E-01 | 8.45E-01 |
| <b>SRRM1P3</b>      | NA    | NA       | NA       | -0.89 | 3.35E-01 | 8.45E-01 |
| <b>TUSC1</b>        | -0.04 | 8.77E-01 | 1.00E+00 | -0.54 | 3.35E-01 | 8.45E-01 |
| <b>ZNF638</b>       | 0.01  | 9.76E-01 | 1.00E+00 | -0.15 | 3.35E-01 | 8.45E-01 |
| <b>ZBTB6</b>        | 0.52  | 5.22E-02 | 1.00E+00 | 0.31  | 3.35E-01 | 8.45E-01 |
| <b>LBR</b>          | 0.42  | 1.13E-01 | 1.00E+00 | -0.26 | 3.35E-01 | 8.45E-01 |
| <b>FAM92A</b>       | -0.05 | 8.81E-01 | 1.00E+00 | -0.38 | 3.36E-01 | 8.45E-01 |

|                    |       |          |          |       |          |          |
|--------------------|-------|----------|----------|-------|----------|----------|
| <b>SNAPC2</b>      | -0.22 | 1.90E-01 | 1.00E+00 | 0.34  | 3.36E-01 | 8.45E-01 |
| <b>GOLGA6L4</b>    | 1.36  | 1.65E-01 | 1.00E+00 | 0.81  | 3.36E-01 | 8.45E-01 |
| <b>LINC01412</b>   | -0.35 | 9.17E-01 | 1.00E+00 | -0.79 | 3.36E-01 | 8.45E-01 |
| <b>LINC02017</b>   | -0.49 | 7.31E-01 | 1.00E+00 | -1.07 | 3.36E-01 | 8.45E-01 |
| <b>AC099048.1</b>  | 0.65  | 8.22E-01 | 1.00E+00 | 0.75  | 3.36E-01 | 8.45E-01 |
| <b>PLEKH02</b>     | 0.37  | 3.38E-01 | 1.00E+00 | 0.67  | 3.36E-01 | 8.45E-01 |
| <b>DLGAP1</b>      | -0.64 | 4.65E-01 | 1.00E+00 | 0.67  | 3.36E-01 | 8.45E-01 |
| <b>KDM5C</b>       | -0.05 | 8.41E-01 | 1.00E+00 | 0.58  | 3.36E-01 | 8.45E-01 |
| <b>FTLP14</b>      | -0.66 | 4.62E-01 | 1.00E+00 | -0.66 | 3.36E-01 | 8.45E-01 |
| <b>RIPOR2</b>      | -0.22 | 6.15E-01 | 1.00E+00 | 0.44  | 3.36E-01 | 8.45E-01 |
| <b>MTO1</b>        | 0.08  | 7.06E-01 | 1.00E+00 | -0.21 | 3.36E-01 | 8.45E-01 |
| <b>RASGRP4</b>     | 0.07  | 8.69E-01 | 1.00E+00 | 0.76  | 3.36E-01 | 8.45E-01 |
| <b>PPP2CB</b>      | 0.27  | 9.01E-02 | 1.00E+00 | 0.29  | 3.36E-01 | 8.45E-01 |
| <b>NLGN1</b>       | 0.07  | 8.65E-01 | 1.00E+00 | -0.53 | 3.36E-01 | 8.45E-01 |
| <b>CLPSL2</b>      | 1.69  | 6.12E-01 | 1.00E+00 | -1.84 | 3.36E-01 | 8.45E-01 |
| <b>AC002066.1</b>  | -1.14 | 4.02E-01 | 1.00E+00 | -0.86 | 3.36E-01 | 8.45E-01 |
| <b>DRC3</b>        | -0.52 | 2.95E-01 | 1.00E+00 | 0.26  | 3.36E-01 | 8.45E-01 |
| <b>XLOC_000160</b> | -3.20 | 4.73E-02 | 1.00E+00 | -1.18 | 3.36E-01 | 8.45E-01 |
| <b>FBXO3</b>       | 0.05  | 8.41E-01 | 1.00E+00 | -0.35 | 3.36E-01 | 8.45E-01 |
| <b>NCOR2</b>       | -0.52 | 1.30E-01 | 1.00E+00 | 0.72  | 3.36E-01 | 8.45E-01 |
| <b>TRIM27</b>      | 0.01  | 9.50E-01 | 1.00E+00 | 0.28  | 3.36E-01 | 8.45E-01 |
| <b>PRMT3</b>       | 0.22  | 3.26E-01 | 1.00E+00 | -0.18 | 3.36E-01 | 8.45E-01 |
| <b>SLC35D3</b>     | 0.70  | 4.61E-01 | 1.00E+00 | -1.55 | 3.36E-01 | 8.45E-01 |
| <b>FAM25B</b>      | -0.30 | 8.67E-01 | 1.00E+00 | -0.70 | 3.36E-01 | 8.45E-01 |
| <b>POU4F3</b>      | -0.01 | 9.95E-01 | 1.00E+00 | 1.16  | 3.36E-01 | 8.45E-01 |
| <b>IGHG4</b>       | 0.58  | 8.66E-01 | 1.00E+00 | 3.02  | 3.36E-01 | 8.45E-01 |
| <b>NUAK1</b>       | 0.12  | 6.43E-01 | 1.00E+00 | 0.32  | 3.36E-01 | 8.45E-01 |
| <b>AC114488.1</b>  | -2.03 | 2.88E-01 | 1.00E+00 | 0.88  | 3.36E-01 | 8.45E-01 |
| <b>TCEAL8</b>      | -0.04 | 8.42E-01 | 1.00E+00 | -0.30 | 3.36E-01 | 8.45E-01 |
| <b>PHOSPHO1</b>    | -0.44 | 5.93E-01 | 1.00E+00 | 0.96  | 3.36E-01 | 8.45E-01 |
| <b>TGOLN2</b>      | 0.32  | 2.36E-01 | 1.00E+00 | 0.21  | 3.36E-01 | 8.45E-01 |
| <b>ANKHD1</b>      | 0.45  | 5.07E-01 | 1.00E+00 | -0.42 | 3.37E-01 | 8.45E-01 |

|            |       |          |          |       |          |          |
|------------|-------|----------|----------|-------|----------|----------|
| IL15       | 0.18  | 7.60E-01 | 1.00E+00 | 0.47  | 3.37E-01 | 8.45E-01 |
| CSR1P1     | -0.24 | 6.26E-01 | 1.00E+00 | -0.32 | 3.37E-01 | 8.45E-01 |
| SLC28A3    | 0.47  | 4.34E-01 | 1.00E+00 | 0.54  | 3.37E-01 | 8.45E-01 |
| EFR3A      | 0.35  | 1.61E-01 | 1.00E+00 | -0.21 | 3.37E-01 | 8.45E-01 |
| AC109597.2 | -3.43 | 1.67E-01 | 1.00E+00 | -1.45 | 3.37E-01 | 8.45E-01 |
| RNU1-28P   | 1.83  | 4.95E-01 | 1.00E+00 | -1.34 | 3.37E-01 | 8.45E-01 |
| SUMO1P3    | -1.30 | 3.31E-01 | 1.00E+00 | -0.56 | 3.37E-01 | 8.45E-01 |
| ASTE1      | 0.06  | 8.21E-01 | 1.00E+00 | -0.38 | 3.37E-01 | 8.45E-01 |
| ELN-AS1    | 0.52  | 8.30E-01 | 1.00E+00 | 1.09  | 3.37E-01 | 8.45E-01 |
| ARHGEF26   | 0.21  | 5.25E-01 | 1.00E+00 | -0.37 | 3.37E-01 | 8.45E-01 |
| CCDC141    | 0.70  | 4.51E-01 | 1.00E+00 | 0.77  | 3.37E-01 | 8.45E-01 |
| TDRD12     | 0.17  | 8.58E-01 | 1.00E+00 | 0.93  | 3.37E-01 | 8.46E-01 |
| B3GALT2    | -1.40 | 3.16E-01 | 1.00E+00 | -0.91 | 3.37E-01 | 8.46E-01 |
| RARRES2    | 1.71  | 5.67E-03 | 4.48E-01 | 0.52  | 3.37E-01 | 8.46E-01 |
| CIAPIN1P   | 0.56  | 8.71E-01 | 1.00E+00 | 0.92  | 3.37E-01 | 8.46E-01 |
| BAK1       | 0.24  | 3.46E-01 | 1.00E+00 | 0.39  | 3.37E-01 | 8.46E-01 |
| C7orf50    | -0.08 | 8.01E-01 | 1.00E+00 | 0.20  | 3.37E-01 | 8.46E-01 |
| KCNMB3     | -0.63 | 3.83E-01 | 1.00E+00 | -0.65 | 3.38E-01 | 8.46E-01 |
| AC004816.2 | 1.17  | 7.35E-01 | 1.00E+00 | -1.09 | 3.38E-01 | 8.46E-01 |
| AC092127.2 | -0.87 | 4.44E-01 | 1.00E+00 | -0.93 | 3.38E-01 | 8.46E-01 |
| LINC02320  | -2.25 | 2.66E-01 | 1.00E+00 | -1.37 | 3.38E-01 | 8.46E-01 |
| CCDC82     | 0.28  | 4.08E-01 | 1.00E+00 | -0.26 | 3.38E-01 | 8.46E-01 |
| AC009065.5 | -1.64 | 6.28E-01 | 1.00E+00 | -1.39 | 3.38E-01 | 8.46E-01 |
| ZNF771     | -0.19 | 4.18E-01 | 1.00E+00 | 0.25  | 3.38E-01 | 8.46E-01 |
| FAM201A    | -0.50 | 2.07E-01 | 1.00E+00 | -0.76 | 3.38E-01 | 8.46E-01 |
| PF4        | -2.41 | 2.33E-01 | 1.00E+00 | -1.08 | 3.38E-01 | 8.46E-01 |
| ARL6       | 0.18  | 6.12E-01 | 1.00E+00 | -0.34 | 3.38E-01 | 8.46E-01 |
| STOX1      | -0.79 | 1.00E-01 | 1.00E+00 | -0.88 | 3.38E-01 | 8.46E-01 |
| USP27X     | -0.31 | 3.02E-01 | 1.00E+00 | 0.67  | 3.38E-01 | 8.46E-01 |
| AC122710.2 | 0.09  | 9.61E-01 | 1.00E+00 | 1.25  | 3.38E-01 | 8.46E-01 |
| ELP4       | -0.05 | 8.32E-01 | 1.00E+00 | -0.31 | 3.38E-01 | 8.46E-01 |
| KCNS2      | -0.46 | 5.06E-01 | 1.00E+00 | 1.26  | 3.38E-01 | 8.46E-01 |

|                    |       |          |          |       |          |          |
|--------------------|-------|----------|----------|-------|----------|----------|
| <b>XLOC_000555</b> | 0.99  | 4.68E-01 | 1.00E+00 | 1.28  | 3.38E-01 | 8.46E-01 |
| <b>SMU1</b>        | 0.00  | 9.97E-01 | 1.00E+00 | -0.14 | 3.38E-01 | 8.46E-01 |
| <b>OBSL1</b>       | -0.22 | 4.39E-01 | 1.00E+00 | 0.52  | 3.38E-01 | 8.46E-01 |
| <b>AC010969.2</b>  | -0.66 | 1.60E-01 | 1.00E+00 | 0.33  | 3.38E-01 | 8.46E-01 |
| <b>MCEE</b>        | 0.03  | 9.28E-01 | 1.00E+00 | -0.43 | 3.38E-01 | 8.46E-01 |
| <b>ZSCAN29</b>     | -0.07 | 8.04E-01 | 1.00E+00 | 0.42  | 3.38E-01 | 8.46E-01 |
| <b>GAST</b>        | -1.90 | 5.82E-01 | 1.00E+00 | 1.17  | 3.38E-01 | 8.46E-01 |
| <b>ILF3-DT</b>     | -0.10 | 6.52E-01 | 1.00E+00 | -0.24 | 3.39E-01 | 8.46E-01 |
| <b>G33562</b>      | -0.47 | 5.99E-01 | 1.00E+00 | 0.70  | 3.39E-01 | 8.46E-01 |
| <b>EPHA3</b>       | 0.24  | 6.55E-01 | 1.00E+00 | 0.60  | 3.39E-01 | 8.46E-01 |
| <b>NKAIN4</b>      | -1.44 | 2.30E-01 | 1.00E+00 | 0.96  | 3.39E-01 | 8.46E-01 |
| <b>SLC15A4</b>     | 0.01  | 9.78E-01 | 1.00E+00 | -0.38 | 3.39E-01 | 8.46E-01 |
| <b>AC124016.2</b>  | -1.40 | 1.29E-01 | 1.00E+00 | -0.67 | 3.39E-01 | 8.46E-01 |
| <b>KLHDC7A</b>     | 0.71  | 6.19E-01 | 1.00E+00 | -1.20 | 3.39E-01 | 8.46E-01 |
| <b>CFL2</b>        | 0.30  | 5.44E-01 | 1.00E+00 | -0.41 | 3.39E-01 | 8.46E-01 |
| <b>VPS54</b>       | 0.14  | 5.29E-01 | 1.00E+00 | -0.34 | 3.39E-01 | 8.46E-01 |
| <b>RPL5P34</b>     | -0.63 | 5.29E-01 | 1.00E+00 | -0.55 | 3.39E-01 | 8.46E-01 |
| <b>AL391650.1</b>  | -0.08 | 9.44E-01 | 1.00E+00 | -1.18 | 3.39E-01 | 8.46E-01 |
| <b>AC008957.1</b>  | -0.38 | 7.77E-01 | 1.00E+00 | 1.27  | 3.39E-01 | 8.46E-01 |
| <b>PHF2</b>        | 0.06  | 7.79E-01 | 1.00E+00 | 0.48  | 3.39E-01 | 8.46E-01 |
| <b>LRCH2</b>       | 0.85  | 2.21E-01 | 1.00E+00 | 0.88  | 3.39E-01 | 8.46E-01 |
| <b>G909</b>        | 0.89  | 3.04E-01 | 1.00E+00 | 1.19  | 3.39E-01 | 8.46E-01 |
| <b>G13548</b>      | -2.92 | 3.90E-01 | 1.00E+00 | 1.62  | 3.39E-01 | 8.46E-01 |
| <b>AC008063.1</b>  | -1.83 | 4.11E-01 | 1.00E+00 | 1.01  | 3.39E-01 | 8.46E-01 |
| <b>PZP</b>         | -0.08 | 9.64E-01 | 1.00E+00 | -1.08 | 3.39E-01 | 8.46E-01 |
| <b>KRT36</b>       | -5.54 | 1.06E-03 | 1.68E-01 | -1.63 | 3.39E-01 | 8.46E-01 |
| <b>AC117386.1</b>  | -1.27 | 7.04E-01 | 1.00E+00 | 1.30  | 3.39E-01 | 8.46E-01 |
| <b>PCDHGB4</b>     | -0.14 | 7.17E-01 | 1.00E+00 | -0.49 | 3.39E-01 | 8.46E-01 |
| <b>POLRMTP1</b>    | -0.13 | 9.22E-01 | 1.00E+00 | -0.70 | 3.39E-01 | 8.46E-01 |
| <b>AL355075.4</b>  | -0.25 | 5.40E-01 | 1.00E+00 | -0.63 | 3.39E-01 | 8.46E-01 |
| <b>IGLV8-61</b>    | 2.10  | 5.34E-01 | 1.00E+00 | 3.03  | 3.39E-01 | 8.46E-01 |
| <b>SCIMP</b>       | 0.82  | 5.68E-01 | 1.00E+00 | 2.85  | 3.39E-01 | 8.46E-01 |



|                   |       |          |          |       |          |          |
|-------------------|-------|----------|----------|-------|----------|----------|
| <b>ACSM1</b>      | 0.91  | 6.18E-02 | 1.00E+00 | 0.66  | 3.39E-01 | 8.46E-01 |
| <b>ZNF296</b>     | -0.74 | 2.09E-02 | 8.94E-01 | -0.36 | 3.39E-01 | 8.46E-01 |
| <b>MOK</b>        | -0.20 | 4.68E-01 | 1.00E+00 | -0.37 | 3.39E-01 | 8.46E-01 |
| <b>AF129075.2</b> | NA    | NA       | NA       | -1.22 | 3.39E-01 | 8.46E-01 |
| <b>SLC38A1</b>    | 0.17  | 5.24E-01 | 1.00E+00 | -0.29 | 3.39E-01 | 8.46E-01 |
| <b>C1QTNF3</b>    | 1.98  | 1.40E-01 | 1.00E+00 | 0.66  | 3.39E-01 | 8.46E-01 |
| <b>PTRHD1</b>     | -0.20 | 6.02E-01 | 1.00E+00 | -0.46 | 3.39E-01 | 8.46E-01 |
| <b>TOMM20P2</b>   | 0.49  | 6.72E-01 | 1.00E+00 | 1.44  | 3.40E-01 | 8.46E-01 |
| <b>GPC2</b>       | 0.01  | 9.90E-01 | 1.00E+00 | 0.64  | 3.40E-01 | 8.46E-01 |
| <b>BX284668.2</b> | -0.30 | 6.52E-01 | 1.00E+00 | -1.39 | 3.40E-01 | 8.46E-01 |
| <b>CMTM7</b>      | -0.43 | 1.98E-01 | 1.00E+00 | 0.24  | 3.40E-01 | 8.46E-01 |
| <b>LXN</b>        | -0.05 | 7.87E-01 | 1.00E+00 | -0.30 | 3.40E-01 | 8.46E-01 |
| <b>INPP4B</b>     | 0.12  | 6.49E-01 | 1.00E+00 | 0.34  | 3.40E-01 | 8.46E-01 |
| <b>AL731556.2</b> | NA    | NA       | NA       | 2.62  | 3.40E-01 | 8.46E-01 |
| <b>HIST1H2BK</b>  | -0.68 | 2.21E-01 | 1.00E+00 | 0.46  | 3.40E-01 | 8.46E-01 |
| <b>AL591846.1</b> | -5.53 | 2.14E-03 | 2.39E-01 | -0.98 | 3.40E-01 | 8.47E-01 |
| <b>SMIM1</b>      | 0.03  | 9.66E-01 | 1.00E+00 | -0.48 | 3.40E-01 | 8.47E-01 |
| <b>LINC00920</b>  | -0.47 | 4.22E-01 | 1.00E+00 | 0.62  | 3.40E-01 | 8.47E-01 |
| <b>G16026</b>     | 4.72  | 1.59E-01 | 1.00E+00 | 1.01  | 3.40E-01 | 8.47E-01 |
| <b>ARAP3</b>      | 0.10  | 8.43E-01 | 1.00E+00 | 0.67  | 3.40E-01 | 8.47E-01 |
| <b>EIF3A</b>      | -0.01 | 9.77E-01 | 1.00E+00 | 0.22  | 3.40E-01 | 8.47E-01 |
| <b>GLB1L</b>      | 0.01  | 9.74E-01 | 1.00E+00 | 0.29  | 3.40E-01 | 8.47E-01 |
| <b>PPIP5K1</b>    | -0.32 | 3.25E-02 | 1.00E+00 | -0.34 | 3.40E-01 | 8.47E-01 |
| <b>G1580</b>      | -2.17 | 4.48E-01 | 1.00E+00 | 1.48  | 3.40E-01 | 8.47E-01 |
| <b>ZNF644</b>     | -0.03 | 9.12E-01 | 1.00E+00 | -0.20 | 3.40E-01 | 8.47E-01 |
| <b>ARF3</b>       | 0.05  | 7.54E-01 | 1.00E+00 | 0.31  | 3.40E-01 | 8.47E-01 |
| <b>RBM5</b>       | 0.34  | 3.85E-01 | 1.00E+00 | 0.21  | 3.40E-01 | 8.47E-01 |
| <b>MYL6</b>       | 0.17  | 3.80E-01 | 1.00E+00 | -0.28 | 3.40E-01 | 8.47E-01 |
| <b>CENPE</b>      | -0.18 | 6.43E-01 | 1.00E+00 | -0.46 | 3.41E-01 | 8.47E-01 |
| <b>BTBD9</b>      | -0.23 | 3.34E-01 | 1.00E+00 | 0.38  | 3.41E-01 | 8.47E-01 |
| <b>AC093677.2</b> | -0.16 | 8.93E-01 | 1.00E+00 | -0.59 | 3.41E-01 | 8.47E-01 |
| <b>KCTD4</b>      | 0.57  | 3.90E-01 | 1.00E+00 | 0.75  | 3.41E-01 | 8.47E-01 |

|             |       |          |          |       |          |          |
|-------------|-------|----------|----------|-------|----------|----------|
| ZNF135      | 0.14  | 7.32E-01 | 1.00E+00 | -0.44 | 3.41E-01 | 8.47E-01 |
| XLOC_000647 | -0.49 | 2.23E-01 | 1.00E+00 | 0.88  | 3.41E-01 | 8.47E-01 |
| ARHGEF19    | -0.12 | 7.41E-01 | 1.00E+00 | -0.40 | 3.41E-01 | 8.47E-01 |
| ZGRF1       | 0.24  | 6.60E-01 | 1.00E+00 | -0.61 | 3.41E-01 | 8.48E-01 |
| ANKRD10     | 0.11  | 6.72E-01 | 1.00E+00 | 0.24  | 3.41E-01 | 8.48E-01 |
| IGFLR1      | 1.28  | 6.35E-01 | 1.00E+00 | 0.55  | 3.41E-01 | 8.48E-01 |
| LINC00598   | 2.26  | 1.92E-02 | 8.71E-01 | -0.90 | 3.41E-01 | 8.48E-01 |
| CAMK1G      | -4.61 | 1.01E-03 | 1.65E-01 | 1.02  | 3.41E-01 | 8.48E-01 |
| NPTN        | -0.04 | 8.17E-01 | 1.00E+00 | -0.58 | 3.41E-01 | 8.48E-01 |
| AC084024.4  | -0.78 | 4.41E-01 | 1.00E+00 | 0.65  | 3.41E-01 | 8.48E-01 |
| COA5        | 0.24  | 2.15E-01 | 1.00E+00 | -0.24 | 3.41E-01 | 8.48E-01 |
| AMOTL1      | 0.05  | 8.61E-01 | 1.00E+00 | 0.34  | 3.42E-01 | 8.48E-01 |
| AC010504.1  | -0.46 | 7.02E-01 | 1.00E+00 | -0.82 | 3.42E-01 | 8.49E-01 |
| COX4I2      | 0.52  | 3.59E-01 | 1.00E+00 | 0.41  | 3.42E-01 | 8.49E-01 |
| CD109       | 0.00  | 9.91E-01 | 1.00E+00 | 0.22  | 3.42E-01 | 8.49E-01 |
| FGD5        | 0.22  | 5.98E-01 | 1.00E+00 | 0.57  | 3.42E-01 | 8.49E-01 |
| USH2A       | 1.33  | 4.83E-01 | 1.00E+00 | 1.44  | 3.42E-01 | 8.49E-01 |
| CDO1        | 1.91  | 3.94E-02 | 1.00E+00 | -0.72 | 3.42E-01 | 8.49E-01 |
| KLF7-IT1    | -2.08 | 1.78E-01 | 1.00E+00 | 0.99  | 3.42E-01 | 8.49E-01 |
| CNIH1       | 0.08  | 7.09E-01 | 1.00E+00 | -0.21 | 3.42E-01 | 8.49E-01 |
| PPP1R3C     | -0.14 | 8.20E-01 | 1.00E+00 | -0.43 | 3.42E-01 | 8.49E-01 |
| AL450992.3  | 0.56  | 8.71E-01 | 1.00E+00 | 2.55  | 3.42E-01 | 8.49E-01 |
| C8G         | -0.56 | 5.51E-01 | 1.00E+00 | 0.96  | 3.42E-01 | 8.49E-01 |
| TIGD5       | 0.00  | 9.99E-01 | 1.00E+00 | 0.48  | 3.42E-01 | 8.49E-01 |
| ZBTB26      | 0.33  | 3.08E-01 | 1.00E+00 | 0.48  | 3.42E-01 | 8.49E-01 |
| MKKS        | 0.25  | 3.64E-01 | 1.00E+00 | -0.28 | 3.42E-01 | 8.49E-01 |
| SLC5A1      | 0.32  | 5.06E-01 | 1.00E+00 | 0.48  | 3.42E-01 | 8.49E-01 |
| COQ6        | 0.58  | 2.69E-01 | 1.00E+00 | -0.39 | 3.42E-01 | 8.49E-01 |
| AC009041.4  | -1.61 | 3.19E-01 | 1.00E+00 | 1.40  | 3.42E-01 | 8.49E-01 |
| DLGAP2      | -0.86 | 2.48E-01 | 1.00E+00 | 0.58  | 3.43E-01 | 8.49E-01 |
| MPRIP       | 0.00  | 9.95E-01 | 1.00E+00 | 0.55  | 3.43E-01 | 8.49E-01 |
| EIPR1       | -0.14 | 5.64E-01 | 1.00E+00 | 0.19  | 3.43E-01 | 8.49E-01 |

|                   |       |          |          |       |          |          |
|-------------------|-------|----------|----------|-------|----------|----------|
| <b>PKMYT1</b>     | -0.64 | 1.89E-01 | 1.00E+00 | 0.58  | 3.43E-01 | 8.49E-01 |
| <b>MCL1</b>       | -0.11 | 7.12E-01 | 1.00E+00 | 0.45  | 3.43E-01 | 8.49E-01 |
| <b>PPIH</b>       | 0.04  | 9.14E-01 | 1.00E+00 | -0.16 | 3.43E-01 | 8.49E-01 |
| <b>KCNA7</b>      | 0.89  | 4.91E-01 | 1.00E+00 | 1.58  | 3.43E-01 | 8.49E-01 |
| <b>ELF2</b>       | 0.00  | 9.89E-01 | 1.00E+00 | -0.26 | 3.43E-01 | 8.49E-01 |
| <b>WTAPP1</b>     | -1.75 | 3.31E-01 | 1.00E+00 | 1.01  | 3.43E-01 | 8.49E-01 |
| <b>MAP1S</b>      | 0.04  | 8.90E-01 | 1.00E+00 | 0.57  | 3.43E-01 | 8.49E-01 |
| <b>ASIC2</b>      | -1.04 | 2.33E-01 | 1.00E+00 | 1.16  | 3.43E-01 | 8.49E-01 |
| <b>LNP1</b>       | 0.29  | 5.86E-01 | 1.00E+00 | 0.62  | 3.43E-01 | 8.49E-01 |
| <b>G36147</b>     | -0.40 | 7.50E-01 | 1.00E+00 | -3.02 | 3.43E-01 | 8.49E-01 |
| <b>TRAV26-1</b>   | 2.49  | 2.29E-01 | 1.00E+00 | 1.52  | 3.43E-01 | 8.49E-01 |
| <b>TTLL7</b>      | -0.15 | 7.93E-01 | 1.00E+00 | -0.41 | 3.43E-01 | 8.49E-01 |
| <b>EXOSC3P1</b>   | -0.39 | 9.10E-01 | 1.00E+00 | -0.96 | 3.43E-01 | 8.49E-01 |
| <b>UMODL1</b>     | 0.29  | 7.55E-01 | 1.00E+00 | -1.04 | 3.43E-01 | 8.49E-01 |
| <b>PTPN4</b>      | 0.39  | 1.20E-01 | 1.00E+00 | -0.27 | 3.43E-01 | 8.49E-01 |
| <b>GHR</b>        | 1.18  | 4.33E-02 | 1.00E+00 | -0.59 | 3.43E-01 | 8.49E-01 |
| <b>YBX1P4</b>     | -0.38 | 8.87E-01 | 1.00E+00 | 1.77  | 3.43E-01 | 8.49E-01 |
| <b>HES1</b>       | -0.37 | 3.56E-01 | 1.00E+00 | -0.50 | 3.43E-01 | 8.49E-01 |
| <b>DCAF13</b>     | -0.08 | 7.48E-01 | 1.00E+00 | -0.31 | 3.43E-01 | 8.49E-01 |
| <b>GPR161</b>     | -0.01 | 9.85E-01 | 1.00E+00 | 0.31  | 3.44E-01 | 8.49E-01 |
| <b>SERPINB2</b>   | 0.48  | 3.30E-01 | 1.00E+00 | -0.58 | 3.44E-01 | 8.49E-01 |
| <b>SHC3</b>       | 0.09  | 8.78E-01 | 1.00E+00 | 0.43  | 3.44E-01 | 8.49E-01 |
| <b>ERGIC1</b>     | 0.18  | 4.69E-01 | 1.00E+00 | 0.44  | 3.44E-01 | 8.49E-01 |
| <b>AC245100.8</b> | -0.50 | 1.07E-01 | 1.00E+00 | 0.48  | 3.44E-01 | 8.49E-01 |
| <b>WDR17</b>      | 0.09  | 9.10E-01 | 1.00E+00 | -0.86 | 3.44E-01 | 8.49E-01 |
| <b>GFM1</b>       | -0.03 | 9.08E-01 | 1.00E+00 | -0.16 | 3.44E-01 | 8.49E-01 |
| <b>EXOSC8</b>     | -0.06 | 8.01E-01 | 1.00E+00 | -0.40 | 3.44E-01 | 8.49E-01 |
| <b>WNT10A</b>     | -0.20 | 5.95E-01 | 1.00E+00 | -0.81 | 3.44E-01 | 8.49E-01 |
| <b>AC092437.1</b> | -0.10 | 9.40E-01 | 1.00E+00 | 1.08  | 3.44E-01 | 8.49E-01 |
| <b>TM2D3</b>      | 0.34  | 6.53E-02 | 1.00E+00 | -0.26 | 3.44E-01 | 8.49E-01 |
| <b>ATP6V0D1</b>   | -0.16 | 4.02E-01 | 1.00E+00 | 0.12  | 3.44E-01 | 8.49E-01 |
| <b>EPN2</b>       | 0.10  | 7.51E-01 | 1.00E+00 | -0.24 | 3.44E-01 | 8.49E-01 |

|                    |       |          |          |       |          |          |
|--------------------|-------|----------|----------|-------|----------|----------|
| <b>G12287</b>      | -1.09 | 4.92E-01 | 1.00E+00 | 0.90  | 3.44E-01 | 8.49E-01 |
| <b>ZNF589</b>      | -0.13 | 6.30E-01 | 1.00E+00 | 0.39  | 3.44E-01 | 8.49E-01 |
| <b>MVK</b>         | -0.21 | 5.55E-01 | 1.00E+00 | 0.27  | 3.44E-01 | 8.49E-01 |
| <b>LINC00574</b>   | -0.52 | 8.06E-01 | 1.00E+00 | 1.25  | 3.44E-01 | 8.49E-01 |
| <b>AC090825.1</b>  | -0.18 | 7.71E-01 | 1.00E+00 | 0.71  | 3.44E-01 | 8.49E-01 |
| <b>RAPGEFL1</b>    | -0.03 | 9.46E-01 | 1.00E+00 | -0.65 | 3.44E-01 | 8.49E-01 |
| <b>LTB4R2</b>      | -0.14 | 7.36E-01 | 1.00E+00 | -0.58 | 3.44E-01 | 8.50E-01 |
| <b>XLOC_003668</b> | 0.19  | 8.01E-01 | 1.00E+00 | 1.51  | 3.44E-01 | 8.50E-01 |
| <b>CSNK2A2</b>     | 0.05  | 9.07E-01 | 1.00E+00 | 0.30  | 3.44E-01 | 8.50E-01 |
| <b>AC008764.2</b>  | -0.25 | 5.85E-01 | 1.00E+00 | 0.99  | 3.44E-01 | 8.50E-01 |
| <b>IGHV4-59</b>    | 1.73  | 3.32E-01 | 1.00E+00 | 2.98  | 3.45E-01 | 8.50E-01 |
| <b>LCE1F</b>       | 0.20  | 7.80E-01 | 1.00E+00 | 0.74  | 3.45E-01 | 8.50E-01 |
| <b>CASP8AP2</b>    | -0.05 | 8.45E-01 | 1.00E+00 | -0.24 | 3.45E-01 | 8.50E-01 |
| <b>HCST</b>        | -2.04 | 4.72E-01 | 1.00E+00 | 0.54  | 3.45E-01 | 8.50E-01 |
| <b>PORCN</b>       | -0.36 | 1.07E-01 | 1.00E+00 | 0.18  | 3.45E-01 | 8.50E-01 |
| <b>AC093218.1</b>  | 0.44  | 4.97E-01 | 1.00E+00 | 0.96  | 3.45E-01 | 8.50E-01 |
| <b>SLC35A1</b>     | 0.10  | 7.24E-01 | 1.00E+00 | -0.40 | 3.45E-01 | 8.50E-01 |
| <b>LRRC69</b>      | 1.10  | 1.33E-01 | 1.00E+00 | -0.55 | 3.45E-01 | 8.50E-01 |
| <b>DPRXP4</b>      | 0.81  | 6.78E-01 | 1.00E+00 | 1.20  | 3.45E-01 | 8.50E-01 |
| <b>SLC29A1</b>     | 0.20  | 5.84E-01 | 1.00E+00 | -0.30 | 3.45E-01 | 8.50E-01 |
| <b>GAS7</b>        | 0.06  | 8.63E-01 | 1.00E+00 | 0.34  | 3.45E-01 | 8.50E-01 |
| <b>NAPSA</b>       | 0.89  | 4.79E-01 | 1.00E+00 | 1.23  | 3.45E-01 | 8.50E-01 |
| <b>SEMA4C</b>      | -0.26 | 2.82E-01 | 1.00E+00 | 0.54  | 3.45E-01 | 8.50E-01 |
| <b>PPP4C</b>       | -0.12 | 6.14E-01 | 1.00E+00 | -0.38 | 3.45E-01 | 8.50E-01 |
| <b>LRIF1</b>       | 0.11  | 6.60E-01 | 1.00E+00 | -0.26 | 3.45E-01 | 8.50E-01 |
| <b>AC009403.2</b>  | -1.61 | 6.41E-01 | 1.00E+00 | 0.94  | 3.45E-01 | 8.50E-01 |
| <b>TBC1D31</b>     | -0.03 | 9.31E-01 | 1.00E+00 | -0.51 | 3.45E-01 | 8.50E-01 |
| <b>AL355102.1</b>  | 30.00 | 6.58E-18 | 5.54E-15 | 1.21  | 3.45E-01 | 8.50E-01 |
| <b>B2M</b>         | 0.25  | 4.75E-01 | 1.00E+00 | 0.30  | 3.45E-01 | 8.50E-01 |
| <b>SPRY2</b>       | 0.31  | 5.28E-02 | 1.00E+00 | -0.34 | 3.45E-01 | 8.50E-01 |
| <b>BARX2</b>       | -0.35 | 3.51E-01 | 1.00E+00 | 0.65  | 3.45E-01 | 8.50E-01 |
| <b>AL831711.1</b>  | -0.93 | 5.72E-01 | 1.00E+00 | 1.01  | 3.45E-01 | 8.50E-01 |

|                   |       |          |          |       |          |          |
|-------------------|-------|----------|----------|-------|----------|----------|
| <b>PIK3CD-AS2</b> | -0.55 | 3.75E-01 | 1.00E+00 | 0.44  | 3.45E-01 | 8.50E-01 |
| <b>GMNN</b>       | 0.09  | 7.14E-01 | 1.00E+00 | -0.40 | 3.46E-01 | 8.50E-01 |
| <b>LCA5L</b>      | 0.53  | 2.83E-01 | 1.00E+00 | -0.63 | 3.46E-01 | 8.50E-01 |
| <b>MSC</b>        | -0.30 | 4.72E-01 | 1.00E+00 | 0.58  | 3.46E-01 | 8.50E-01 |
| <b>RRP12</b>      | -0.34 | 3.11E-01 | 1.00E+00 | 0.44  | 3.46E-01 | 8.50E-01 |
| <b>MYDGF</b>      | -0.10 | 6.25E-01 | 1.00E+00 | 0.20  | 3.46E-01 | 8.50E-01 |
| <b>TTBK2</b>      | -0.01 | 9.66E-01 | 1.00E+00 | -0.44 | 3.46E-01 | 8.50E-01 |
| <b>AL022313.2</b> | -1.58 | 3.37E-01 | 1.00E+00 | -1.00 | 3.46E-01 | 8.50E-01 |
| <b>G31873</b>     | 0.33  | 7.10E-01 | 1.00E+00 | 0.81  | 3.46E-01 | 8.50E-01 |
| <b>AMMECR1L</b>   | -0.09 | 6.94E-01 | 1.00E+00 | 0.37  | 3.46E-01 | 8.50E-01 |
| <b>NADK</b>       | 0.19  | 4.49E-01 | 1.00E+00 | 0.53  | 3.46E-01 | 8.50E-01 |
| <b>3-Sep</b>      | -0.89 | 1.68E-01 | 1.00E+00 | 0.87  | 3.46E-01 | 8.50E-01 |
| <b>ESYT1</b>      | 0.31  | 3.44E-01 | 1.00E+00 | -0.34 | 3.46E-01 | 8.50E-01 |
| <b>AC092139.2</b> | -2.10 | 3.73E-01 | 1.00E+00 | -1.38 | 3.46E-01 | 8.50E-01 |
| <b>LINC02361</b>  | -0.68 | 1.88E-01 | 1.00E+00 | 0.68  | 3.46E-01 | 8.50E-01 |
| <b>7-Sep</b>      | -0.04 | 8.44E-01 | 1.00E+00 | -0.23 | 3.46E-01 | 8.51E-01 |
| <b>ZBTB43</b>     | -0.20 | 5.04E-01 | 1.00E+00 | 0.28  | 3.46E-01 | 8.51E-01 |
| <b>RIC1</b>       | 0.15  | 5.13E-01 | 1.00E+00 | 0.35  | 3.46E-01 | 8.51E-01 |
| <b>AC010210.1</b> | -2.14 | 2.57E-01 | 1.00E+00 | 0.88  | 3.46E-01 | 8.51E-01 |
| <b>APOD</b>       | 0.56  | 2.71E-01 | 1.00E+00 | 0.42  | 3.46E-01 | 8.51E-01 |
| <b>LMF1</b>       | -0.09 | 7.14E-01 | 1.00E+00 | 0.18  | 3.46E-01 | 8.51E-01 |
| <b>ZNF692</b>     | -0.74 | 2.20E-02 | 8.96E-01 | 0.38  | 3.46E-01 | 8.51E-01 |
| <b>Z98885.2</b>   | -1.60 | 6.43E-01 | 1.00E+00 | -1.38 | 3.46E-01 | 8.51E-01 |
| <b>AL157895.1</b> | -1.05 | 3.40E-01 | 1.00E+00 | 0.54  | 3.46E-01 | 8.51E-01 |
| <b>UBE2F</b>      | 0.11  | 5.87E-01 | 1.00E+00 | -0.19 | 3.46E-01 | 8.51E-01 |
| <b>CASQ1</b>      | -0.29 | 7.53E-01 | 1.00E+00 | -1.08 | 3.46E-01 | 8.51E-01 |
| <b>ARID1B</b>     | -0.29 | 2.27E-01 | 1.00E+00 | -0.25 | 3.46E-01 | 8.51E-01 |
| <b>LRRC39</b>     | 2.24  | 8.54E-02 | 1.00E+00 | 0.73  | 3.47E-01 | 8.51E-01 |
| <b>MKLN1-AS</b>   | 0.23  | 6.08E-01 | 1.00E+00 | -0.34 | 3.47E-01 | 8.51E-01 |
| <b>CPA1</b>       | 0.15  | 9.22E-01 | 1.00E+00 | -1.10 | 3.47E-01 | 8.51E-01 |
| <b>ZFP3</b>       | 0.18  | 6.47E-01 | 1.00E+00 | -0.39 | 3.47E-01 | 8.51E-01 |
| <b>G2523</b>      | 0.58  | 7.19E-01 | 1.00E+00 | -1.64 | 3.47E-01 | 8.51E-01 |

|                   |       |          |          |       |          |          |
|-------------------|-------|----------|----------|-------|----------|----------|
| <b>RPLP1P6</b>    | 0.60  | 3.86E-01 | 1.00E+00 | 0.45  | 3.47E-01 | 8.51E-01 |
| <b>OMD</b>        | 0.73  | 8.90E-02 | 1.00E+00 | 0.51  | 3.47E-01 | 8.51E-01 |
| <b>LINC02603</b>  | 1.33  | 6.93E-01 | 1.00E+00 | -0.78 | 3.47E-01 | 8.51E-01 |
| <b>YBX1</b>       | -0.17 | 3.69E-01 | 1.00E+00 | 0.49  | 3.47E-01 | 8.51E-01 |
| <b>G8972</b>      | -0.08 | 9.51E-01 | 1.00E+00 | 0.78  | 3.47E-01 | 8.51E-01 |
| <b>PNMA3</b>      | -4.18 | 6.86E-04 | 1.25E-01 | 1.28  | 3.47E-01 | 8.51E-01 |
| <b>INE1</b>       | -1.68 | 2.96E-01 | 1.00E+00 | -0.76 | 3.47E-01 | 8.51E-01 |
| <b>SNX5</b>       | 0.25  | 2.63E-01 | 1.00E+00 | -0.24 | 3.47E-01 | 8.51E-01 |
| <b>TMEM60</b>     | 0.10  | 6.92E-01 | 1.00E+00 | -0.29 | 3.47E-01 | 8.51E-01 |
| <b>SH3D19</b>     | 0.25  | 1.99E-01 | 1.00E+00 | -0.26 | 3.47E-01 | 8.51E-01 |
| <b>SNORD125</b>   | 0.69  | 6.05E-01 | 1.00E+00 | 1.93  | 3.47E-01 | 8.51E-01 |
| <b>AC016590.3</b> | 0.94  | 3.78E-01 | 1.00E+00 | 1.15  | 3.47E-01 | 8.51E-01 |
| <b>BAP1</b>       | -0.14 | 4.38E-01 | 1.00E+00 | 0.32  | 3.47E-01 | 8.51E-01 |
| <b>CD209</b>      | 0.06  | 9.24E-01 | 1.00E+00 | 0.64  | 3.47E-01 | 8.51E-01 |
| <b>TMEM80</b>     | -0.15 | 4.48E-01 | 1.00E+00 | -0.24 | 3.47E-01 | 8.51E-01 |
| <b>PGM2L1</b>     | -0.02 | 9.65E-01 | 1.00E+00 | 0.34  | 3.47E-01 | 8.51E-01 |
| <b>TRIQQ</b>      | 0.23  | 5.42E-01 | 1.00E+00 | 0.23  | 3.47E-01 | 8.51E-01 |
| <b>HK2</b>        | -0.21 | 6.81E-01 | 1.00E+00 | 0.52  | 3.47E-01 | 8.51E-01 |
| <b>EEF1AKMT4</b>  | -0.38 | 3.36E-01 | 1.00E+00 | 0.38  | 3.47E-01 | 8.51E-01 |
| <b>SPPL2A</b>     | 0.40  | 9.95E-02 | 1.00E+00 | -0.21 | 3.47E-01 | 8.51E-01 |
| <b>CCNI</b>       | 0.11  | 6.44E-01 | 1.00E+00 | -0.20 | 3.48E-01 | 8.51E-01 |
| <b>ARL1</b>       | 0.21  | 2.44E-01 | 1.00E+00 | -0.19 | 3.48E-01 | 8.51E-01 |
| <b>MEF2C-AS1</b>  | -0.78 | 1.80E-01 | 1.00E+00 | 0.62  | 3.48E-01 | 8.51E-01 |
| <b>AC104695.1</b> | -0.67 | 8.48E-01 | 1.00E+00 | 1.95  | 3.48E-01 | 8.51E-01 |
| <b>AL662800.1</b> | -1.50 | 1.49E-01 | 1.00E+00 | -0.56 | 3.48E-01 | 8.51E-01 |
| <b>OR7A5</b>      | 0.22  | 8.25E-01 | 1.00E+00 | -1.19 | 3.48E-01 | 8.51E-01 |
| <b>SPAG5</b>      | -0.33 | 2.07E-01 | 1.00E+00 | 0.36  | 3.48E-01 | 8.51E-01 |
| <b>CYB5R3</b>     | 0.12  | 6.43E-01 | 1.00E+00 | -0.24 | 3.48E-01 | 8.51E-01 |
| <b>CASTOR3</b>    | -0.43 | 2.53E-01 | 1.00E+00 | -0.61 | 3.48E-01 | 8.51E-01 |
| <b>AC103853.2</b> | -2.19 | 5.21E-01 | 1.00E+00 | 1.04  | 3.48E-01 | 8.51E-01 |
| <b>RNASE7</b>     | 0.24  | 7.50E-01 | 1.00E+00 | 0.66  | 3.48E-01 | 8.51E-01 |
| <b>MFSD8</b>      | 0.38  | 3.22E-01 | 1.00E+00 | -0.32 | 3.48E-01 | 8.51E-01 |

|                      |       |          |          |       |          |          |
|----------------------|-------|----------|----------|-------|----------|----------|
| <b>RP11-592B15.4</b> | -0.02 | 9.49E-01 | 1.00E+00 | -0.22 | 3.48E-01 | 8.51E-01 |
| <b>PMAIP1</b>        | -0.53 | 4.27E-01 | 1.00E+00 | 0.51  | 3.48E-01 | 8.51E-01 |
| <b>ZNF561</b>        | 0.06  | 7.84E-01 | 1.00E+00 | 0.20  | 3.48E-01 | 8.51E-01 |
| <b>EMP2</b>          | -0.13 | 7.13E-01 | 1.00E+00 | -0.35 | 3.48E-01 | 8.51E-01 |
| <b>DRD1</b>          | -0.05 | 9.56E-01 | 1.00E+00 | 1.32  | 3.48E-01 | 8.51E-01 |
| <b>DCP1A</b>         | 0.17  | 4.90E-01 | 1.00E+00 | 0.22  | 3.48E-01 | 8.51E-01 |
| <b>AC021851.1</b>    | -1.30 | 6.82E-01 | 1.00E+00 | 1.28  | 3.48E-01 | 8.51E-01 |
| <b>CEACAM4</b>       | 1.52  | 3.31E-01 | 1.00E+00 | 1.16  | 3.48E-01 | 8.51E-01 |
| <b>EMX2</b>          | 0.31  | 4.58E-01 | 1.00E+00 | 0.39  | 3.48E-01 | 8.51E-01 |
| <b>FIG4</b>          | 0.13  | 6.17E-01 | 1.00E+00 | -0.22 | 3.48E-01 | 8.51E-01 |
| <b>TMPRSS11A</b>     | NA    | NA       | NA       | 1.76  | 3.48E-01 | 8.51E-01 |
| <b>MAMDC4</b>        | 1.06  | 1.56E-01 | 1.00E+00 | 1.08  | 3.48E-01 | 8.51E-01 |
| <b>RNF220</b>        | 0.03  | 8.89E-01 | 1.00E+00 | -0.30 | 3.48E-01 | 8.51E-01 |
| <b>SEM1</b>          | 0.10  | 6.27E-01 | 1.00E+00 | -0.34 | 3.48E-01 | 8.51E-01 |
| <b>NR4A2</b>         | -1.38 | 4.28E-02 | 1.00E+00 | 0.52  | 3.48E-01 | 8.51E-01 |
| <b>ELOCP2</b>        | -0.38 | 9.12E-01 | 1.00E+00 | -0.64 | 3.48E-01 | 8.51E-01 |
| <b>ZNF732</b>        | -0.67 | 2.72E-01 | 1.00E+00 | -0.92 | 3.48E-01 | 8.51E-01 |
| <b>LSM14A</b>        | 0.01  | 9.61E-01 | 1.00E+00 | -0.13 | 3.48E-01 | 8.51E-01 |
| <b>NPIPA5</b>        | -4.34 | 2.13E-03 | 2.39E-01 | -0.93 | 3.49E-01 | 8.51E-01 |
| <b>APPL2</b>         | -0.06 | 8.32E-01 | 1.00E+00 | -0.18 | 3.49E-01 | 8.51E-01 |
| <b>PRMT2</b>         | -0.04 | 7.93E-01 | 1.00E+00 | -0.16 | 3.49E-01 | 8.51E-01 |
| <b>XLOC_000566</b>   | 1.10  | 6.15E-01 | 1.00E+00 | 0.92  | 3.49E-01 | 8.51E-01 |
| <b>COPS4</b>         | 0.07  | 7.32E-01 | 1.00E+00 | -0.28 | 3.49E-01 | 8.51E-01 |
| <b>UBE3D</b>         | 0.20  | 5.87E-01 | 1.00E+00 | 0.46  | 3.49E-01 | 8.51E-01 |
| <b>SSH3</b>          | -0.19 | 3.82E-01 | 1.00E+00 | 0.31  | 3.49E-01 | 8.51E-01 |
| <b>APEX1</b>         | -0.20 | 2.18E-01 | 1.00E+00 | 0.15  | 3.49E-01 | 8.51E-01 |
| <b>KCNIP2</b>        | 4.31  | 1.04E-02 | 6.33E-01 | -0.95 | 3.49E-01 | 8.51E-01 |
| <b>IMMT</b>          | -0.18 | 2.43E-01 | 1.00E+00 | -0.19 | 3.49E-01 | 8.51E-01 |
| <b>LANCL1-AS1</b>    | -0.10 | 9.18E-01 | 1.00E+00 | -0.68 | 3.49E-01 | 8.51E-01 |
| <b>AP001471.1</b>    | -1.49 | 2.43E-01 | 1.00E+00 | -1.14 | 3.49E-01 | 8.51E-01 |
| <b>ASNSP1</b>        | 1.96  | 5.66E-01 | 1.00E+00 | -1.99 | 3.49E-01 | 8.51E-01 |
| <b>NFYA</b>          | -0.12 | 6.92E-01 | 1.00E+00 | 0.36  | 3.49E-01 | 8.51E-01 |

|                    |       |          |          |       |          |          |
|--------------------|-------|----------|----------|-------|----------|----------|
| <b>SLC7A6</b>      | 0.60  | 1.17E-01 | 1.00E+00 | 0.37  | 3.49E-01 | 8.51E-01 |
| <b>ZIK1</b>        | 0.16  | 5.77E-01 | 1.00E+00 | -0.30 | 3.49E-01 | 8.51E-01 |
| <b>FBXL7</b>       | -0.10 | 8.06E-01 | 1.00E+00 | 0.74  | 3.49E-01 | 8.51E-01 |
| <b>FGF22</b>       | 0.11  | 8.58E-01 | 1.00E+00 | -0.74 | 3.49E-01 | 8.51E-01 |
| <b>SMCO4</b>       | 0.30  | 2.48E-01 | 1.00E+00 | 0.30  | 3.49E-01 | 8.51E-01 |
| <b>CAV1</b>        | 0.51  | 2.39E-01 | 1.00E+00 | -0.40 | 3.49E-01 | 8.51E-01 |
| <b>SELENOT</b>     | 0.21  | 3.64E-01 | 1.00E+00 | -0.29 | 3.49E-01 | 8.51E-01 |
| <b>MAPK9</b>       | 0.18  | 4.16E-01 | 1.00E+00 | -0.45 | 3.49E-01 | 8.51E-01 |
| <b>GZMB</b>        | -0.48 | 5.23E-01 | 1.00E+00 | 2.93  | 3.49E-01 | 8.51E-01 |
| <b>BRF1</b>        | 0.05  | 7.88E-01 | 1.00E+00 | 0.56  | 3.49E-01 | 8.51E-01 |
| <b>MAMSTR</b>      | -0.25 | 5.33E-01 | 1.00E+00 | 0.34  | 3.49E-01 | 8.51E-01 |
| <b>SLC6A15</b>     | 0.18  | 6.03E-01 | 1.00E+00 | 0.47  | 3.49E-01 | 8.51E-01 |
| <b>TWNK</b>        | 0.01  | 9.44E-01 | 1.00E+00 | 0.49  | 3.49E-01 | 8.51E-01 |
| <b>LINC01715</b>   | -0.01 | 9.94E-01 | 1.00E+00 | -0.53 | 3.49E-01 | 8.51E-01 |
| <b>AC073326.1</b>  | -1.41 | 5.17E-01 | 1.00E+00 | -1.30 | 3.49E-01 | 8.51E-01 |
| <b>SHC2</b>        | -0.06 | 8.88E-01 | 1.00E+00 | 0.46  | 3.49E-01 | 8.51E-01 |
| <b>RHPN2</b>       | 0.27  | 8.14E-01 | 1.00E+00 | -0.66 | 3.50E-01 | 8.51E-01 |
| <b>ZEB1-AS1</b>    | 0.60  | 2.60E-01 | 1.00E+00 | -0.36 | 3.50E-01 | 8.51E-01 |
| <b>CCDC160</b>     | 0.35  | 7.24E-01 | 1.00E+00 | -2.00 | 3.50E-01 | 8.51E-01 |
| <b>XLOC_003863</b> | 1.12  | 4.71E-01 | 1.00E+00 | -0.84 | 3.50E-01 | 8.51E-01 |
| <b>AC010457.1</b>  | -0.87 | 7.99E-01 | 1.00E+00 | -1.19 | 3.50E-01 | 8.51E-01 |
| <b>XKR9</b>        | -0.73 | 5.59E-01 | 1.00E+00 | -0.85 | 3.50E-01 | 8.51E-01 |
| <b>MRPS12</b>      | -0.25 | 2.69E-01 | 1.00E+00 | 0.27  | 3.50E-01 | 8.51E-01 |
| <b>ABTB1</b>       | 0.37  | 1.80E-01 | 1.00E+00 | 0.28  | 3.50E-01 | 8.51E-01 |
| <b>AC093510.2</b>  | -1.49 | 6.18E-01 | 1.00E+00 | -1.01 | 3.50E-01 | 8.51E-01 |
| <b>PRPF19</b>      | -0.15 | 4.97E-01 | 1.00E+00 | 0.56  | 3.50E-01 | 8.51E-01 |
| <b>TPM1-AS</b>     | 0.81  | 5.27E-01 | 1.00E+00 | 0.84  | 3.50E-01 | 8.51E-01 |
| <b>NCOA2</b>       | -0.09 | 6.42E-01 | 1.00E+00 | 0.31  | 3.50E-01 | 8.51E-01 |
| <b>AC245123.1</b>  | 2.46  | 1.26E-01 | 1.00E+00 | -1.33 | 3.50E-01 | 8.51E-01 |
| <b>RP11-87H9.2</b> | -0.61 | 2.80E-01 | 1.00E+00 | -0.29 | 3.50E-01 | 8.51E-01 |
| <b>GTF2IP12</b>    | -0.46 | 5.38E-01 | 1.00E+00 | -0.51 | 3.50E-01 | 8.51E-01 |
| <b>G32166</b>      | -0.73 | 1.77E-01 | 1.00E+00 | -0.50 | 3.50E-01 | 8.51E-01 |



|             |       |          |          |       |          |          |
|-------------|-------|----------|----------|-------|----------|----------|
| DENND5A     | 0.25  | 5.49E-01 | 1.00E+00 | 0.49  | 3.50E-01 | 8.51E-01 |
| GEMIN8      | -0.05 | 7.91E-01 | 1.00E+00 | 0.12  | 3.50E-01 | 8.51E-01 |
| HLA-F-AS1   | -0.59 | 3.53E-01 | 1.00E+00 | -0.50 | 3.50E-01 | 8.51E-01 |
| LILRB5      | -0.04 | 9.49E-01 | 1.00E+00 | 0.58  | 3.50E-01 | 8.51E-01 |
| CD58        | -0.13 | 6.84E-01 | 1.00E+00 | -0.43 | 3.50E-01 | 8.51E-01 |
| GSDMC       | 0.10  | 8.51E-01 | 1.00E+00 | 0.63  | 3.50E-01 | 8.51E-01 |
| AC004492.1  | -0.67 | 4.28E-01 | 1.00E+00 | 0.93  | 3.50E-01 | 8.51E-01 |
| GS1-124K5.4 | 0.19  | 6.51E-01 | 1.00E+00 | -0.55 | 3.50E-01 | 8.51E-01 |
| AL031577.1  | -2.14 | 4.81E-01 | 1.00E+00 | -0.87 | 3.50E-01 | 8.51E-01 |
| GPHN        | -0.20 | 3.86E-01 | 1.00E+00 | -0.26 | 3.50E-01 | 8.51E-01 |
| CDK5RAP3    | 0.20  | 8.84E-01 | 1.00E+00 | 0.56  | 3.51E-01 | 8.51E-01 |
| NUTM2B-AS1  | 0.10  | 7.49E-01 | 1.00E+00 | -0.30 | 3.51E-01 | 8.51E-01 |
| RORA-AS1    | 0.94  | 2.85E-01 | 1.00E+00 | 0.63  | 3.51E-01 | 8.51E-01 |
| NECTIN3-AS1 | 1.42  | 4.48E-01 | 1.00E+00 | -1.08 | 3.51E-01 | 8.51E-01 |
| NDC1        | 0.06  | 8.08E-01 | 1.00E+00 | -0.21 | 3.51E-01 | 8.51E-01 |
| OGDH        | -0.19 | 3.21E-01 | 1.00E+00 | 0.35  | 3.51E-01 | 8.51E-01 |
| PRELP       | 0.54  | 2.03E-01 | 1.00E+00 | 0.40  | 3.51E-01 | 8.51E-01 |
| GPR153      | 0.11  | 7.42E-01 | 1.00E+00 | 0.56  | 3.51E-01 | 8.51E-01 |
| RNU4-1      | -0.52 | 7.57E-01 | 1.00E+00 | -0.95 | 3.51E-01 | 8.51E-01 |
| AC104135.1  | -0.66 | 6.37E-01 | 1.00E+00 | 1.27  | 3.51E-01 | 8.51E-01 |
| LINC00535   | 1.07  | 5.46E-01 | 1.00E+00 | 0.80  | 3.51E-01 | 8.51E-01 |
| GRIPAP1     | -0.13 | 5.67E-01 | 1.00E+00 | 0.27  | 3.51E-01 | 8.51E-01 |
| ACVR1B      | -0.16 | 4.96E-01 | 1.00E+00 | 0.46  | 3.51E-01 | 8.51E-01 |
| FCRLA       | -1.99 | 3.38E-02 | 1.00E+00 | 0.51  | 3.51E-01 | 8.51E-01 |
| AC025031.4  | -3.32 | 1.97E-01 | 1.00E+00 | 1.32  | 3.51E-01 | 8.52E-01 |
| AL356057.1  | -0.25 | 9.41E-01 | 1.00E+00 | -1.19 | 3.51E-01 | 8.52E-01 |
| ZNF547      | 1.44  | 1.42E-02 | 7.51E-01 | -0.73 | 3.52E-01 | 8.52E-01 |
| CEACAM19    | -0.29 | 5.59E-01 | 1.00E+00 | 0.60  | 3.52E-01 | 8.52E-01 |
| DNAJC22     | -2.27 | 2.43E-03 | 2.50E-01 | -0.69 | 3.52E-01 | 8.52E-01 |
| KPNA3       | -0.10 | 6.42E-01 | 1.00E+00 | 0.17  | 3.52E-01 | 8.52E-01 |
| AL121672.3  | 0.90  | 3.61E-01 | 1.00E+00 | -0.51 | 3.52E-01 | 8.52E-01 |
| AL117328.1  | -2.70 | 1.59E-01 | 1.00E+00 | 1.33  | 3.52E-01 | 8.52E-01 |

|             |       |          |          |       |          |          |
|-------------|-------|----------|----------|-------|----------|----------|
| CITED2      | -0.18 | 6.66E-01 | 1.00E+00 | 0.47  | 3.52E-01 | 8.52E-01 |
| CKS1BP1     | -3.38 | 7.98E-02 | 1.00E+00 | 0.74  | 3.52E-01 | 8.52E-01 |
| CCR3        | -0.62 | 3.22E-01 | 1.00E+00 | 0.73  | 3.52E-01 | 8.52E-01 |
| RNF208      | -0.73 | 2.10E-02 | 8.94E-01 | 0.58  | 3.52E-01 | 8.53E-01 |
| CNOT2       | -0.09 | 7.07E-01 | 1.00E+00 | -0.16 | 3.52E-01 | 8.53E-01 |
| SUGT1P3     | -0.11 | 9.30E-01 | 1.00E+00 | 0.62  | 3.52E-01 | 8.53E-01 |
| LIPJ        | -1.68 | 3.15E-01 | 1.00E+00 | -1.12 | 3.52E-01 | 8.53E-01 |
| RBM14       | -0.07 | 7.45E-01 | 1.00E+00 | -0.24 | 3.52E-01 | 8.53E-01 |
| MCRS1       | -0.04 | 8.35E-01 | 1.00E+00 | 0.14  | 3.52E-01 | 8.53E-01 |
| ZNF713      | -0.84 | 7.13E-02 | 1.00E+00 | -0.52 | 3.52E-01 | 8.53E-01 |
| RPL29P14    | -2.65 | 3.63E-01 | 1.00E+00 | 0.95  | 3.52E-01 | 8.53E-01 |
| TCFL5       | -0.19 | 4.16E-01 | 1.00E+00 | -0.42 | 3.52E-01 | 8.53E-01 |
| TRIM17      | -0.91 | 1.28E-01 | 1.00E+00 | 0.97  | 3.52E-01 | 8.53E-01 |
| GRAP        | -0.51 | 4.39E-01 | 1.00E+00 | 0.79  | 3.53E-01 | 8.53E-01 |
| CDK2        | 0.37  | 2.47E-01 | 1.00E+00 | -0.22 | 3.53E-01 | 8.53E-01 |
| TCAIM       | 0.23  | 3.60E-01 | 1.00E+00 | -0.23 | 3.53E-01 | 8.53E-01 |
| XLOC_001984 | 2.33  | 4.63E-01 | 1.00E+00 | -0.84 | 3.53E-01 | 8.53E-01 |
| PTOV1-AS1   | -0.30 | 5.95E-01 | 1.00E+00 | -0.66 | 3.53E-01 | 8.53E-01 |
| AC097263.1  | -0.95 | 7.05E-01 | 1.00E+00 | -0.62 | 3.53E-01 | 8.53E-01 |
| RPS26P28    | -1.27 | 6.77E-01 | 1.00E+00 | -0.50 | 3.53E-01 | 8.53E-01 |
| DPH7        | -0.18 | 4.91E-01 | 1.00E+00 | 0.17  | 3.53E-01 | 8.53E-01 |
| FNTB        | 0.34  | 1.04E-01 | 1.00E+00 | -0.22 | 3.53E-01 | 8.53E-01 |
| HS6ST1      | -0.33 | 1.35E-01 | 1.00E+00 | 0.59  | 3.53E-01 | 8.53E-01 |
| ZMIZ1       | -0.47 | 7.29E-02 | 1.00E+00 | 0.44  | 3.53E-01 | 8.53E-01 |
| XLOC_009683 | -2.03 | 4.85E-01 | 1.00E+00 | -0.93 | 3.53E-01 | 8.53E-01 |
| CTNNA2      | -3.14 | 9.26E-04 | 1.56E-01 | -1.15 | 3.53E-01 | 8.53E-01 |
| TANK        | 0.13  | 5.50E-01 | 1.00E+00 | -0.19 | 3.53E-01 | 8.53E-01 |
| PTCHD1      | 0.81  | 3.01E-01 | 1.00E+00 | -0.92 | 3.53E-01 | 8.53E-01 |
| MYL2        | -1.42 | 4.68E-01 | 1.00E+00 | -0.87 | 3.53E-01 | 8.53E-01 |
| LINC01085   | -1.10 | 7.53E-01 | 1.00E+00 | -1.72 | 3.53E-01 | 8.53E-01 |
| HP1BP3      | -0.34 | 1.23E-01 | 1.00E+00 | -0.18 | 3.53E-01 | 8.53E-01 |
| SMC3        | -0.09 | 6.33E-01 | 1.00E+00 | -0.15 | 3.53E-01 | 8.53E-01 |

|                     |       |          |          |       |          |          |
|---------------------|-------|----------|----------|-------|----------|----------|
| <b>SLC25A12</b>     | -0.24 | 1.62E-01 | 1.00E+00 | -0.17 | 3.53E-01 | 8.53E-01 |
| <b>SENCR</b>        | 0.01  | 9.91E-01 | 1.00E+00 | 0.53  | 3.53E-01 | 8.53E-01 |
| <b>BCL2L15</b>      | -2.87 | 1.56E-01 | 1.00E+00 | -1.38 | 3.53E-01 | 8.53E-01 |
| <b>SAAL1</b>        | -0.05 | 8.34E-01 | 1.00E+00 | 0.23  | 3.53E-01 | 8.53E-01 |
| <b>EWSR1</b>        | -0.14 | 5.44E-01 | 1.00E+00 | 0.15  | 3.54E-01 | 8.53E-01 |
| <b>MLXIP</b>        | 0.19  | 4.56E-01 | 1.00E+00 | 0.33  | 3.54E-01 | 8.53E-01 |
| <b>TPM3</b>         | -0.09 | 5.52E-01 | 1.00E+00 | 0.14  | 3.54E-01 | 8.53E-01 |
| <b>AFAP1</b>        | -0.14 | 7.40E-01 | 1.00E+00 | 0.47  | 3.54E-01 | 8.53E-01 |
| <b>FAM72D</b>       | 0.81  | 1.74E-01 | 1.00E+00 | -0.49 | 3.54E-01 | 8.53E-01 |
| <b>AC102945.2</b>   | -0.61 | 6.35E-01 | 1.00E+00 | 1.30  | 3.54E-01 | 8.53E-01 |
| <b>RPL10P3</b>      | -3.83 | 1.15E-01 | 1.00E+00 | -2.73 | 3.54E-01 | 8.53E-01 |
| <b>MALSU1</b>       | 0.16  | 4.29E-01 | 1.00E+00 | -0.26 | 3.54E-01 | 8.53E-01 |
| <b>XLOC_012049</b>  | -2.03 | 4.08E-01 | 1.00E+00 | 1.28  | 3.54E-01 | 8.53E-01 |
| <b>ACCS</b>         | -0.95 | 3.63E-02 | 1.00E+00 | -0.39 | 3.54E-01 | 8.53E-01 |
| <b>AL049649.1</b>   | -1.29 | 1.83E-01 | 1.00E+00 | -0.66 | 3.54E-01 | 8.53E-01 |
| <b>RBL2</b>         | 0.15  | 4.11E-01 | 1.00E+00 | -0.26 | 3.54E-01 | 8.53E-01 |
| <b>AP001347.1</b>   | -0.26 | 7.31E-01 | 1.00E+00 | -0.55 | 3.54E-01 | 8.53E-01 |
| <b>NEBL-AS1</b>     | -0.14 | 8.30E-01 | 1.00E+00 | -0.66 | 3.54E-01 | 8.53E-01 |
| <b>XLOC_014386</b>  | 0.13  | 8.94E-01 | 1.00E+00 | -0.39 | 3.54E-01 | 8.53E-01 |
| <b>NHSL2</b>        | -0.12 | 7.64E-01 | 1.00E+00 | 0.52  | 3.54E-01 | 8.53E-01 |
| <b>OMA1</b>         | 0.35  | 3.32E-01 | 1.00E+00 | -0.39 | 3.54E-01 | 8.53E-01 |
| <b>POP5</b>         | -0.21 | 3.81E-01 | 1.00E+00 | -0.33 | 3.54E-01 | 8.53E-01 |
| <b>FAM182A</b>      | -0.40 | 4.20E-01 | 1.00E+00 | -0.56 | 3.54E-01 | 8.53E-01 |
| <b>XLOC_006699</b>  | -2.40 | 2.82E-01 | 1.00E+00 | 1.34  | 3.54E-01 | 8.53E-01 |
| <b>ZNF461</b>       | 0.29  | 2.14E-01 | 1.00E+00 | -0.36 | 3.54E-01 | 8.53E-01 |
| <b>MRPL42</b>       | 0.18  | 4.45E-01 | 1.00E+00 | -0.38 | 3.54E-01 | 8.54E-01 |
| <b>MIR1-1HG-AS1</b> | -0.71 | 6.76E-01 | 1.00E+00 | -1.37 | 3.54E-01 | 8.54E-01 |
| <b>NINL</b>         | -0.56 | 8.24E-02 | 1.00E+00 | 0.59  | 3.54E-01 | 8.54E-01 |
| <b>AC108676.1</b>   | -0.09 | 9.70E-01 | 1.00E+00 | 1.64  | 3.54E-01 | 8.54E-01 |
| <b>PPFIBP1</b>      | 0.11  | 6.05E-01 | 1.00E+00 | 0.15  | 3.54E-01 | 8.54E-01 |
| <b>KLF7</b>         | 0.01  | 9.89E-01 | 1.00E+00 | 0.36  | 3.54E-01 | 8.54E-01 |
| <b>BANF1P3</b>      | 0.11  | 9.14E-01 | 1.00E+00 | 0.51  | 3.55E-01 | 8.54E-01 |

|                   |       |          |          |       |          |          |
|-------------------|-------|----------|----------|-------|----------|----------|
| <b>AC011503.2</b> | -0.41 | 7.92E-01 | 1.00E+00 | 0.83  | 3.55E-01 | 8.54E-01 |
| <b>AC080023.1</b> | -1.49 | 4.92E-01 | 1.00E+00 | 1.15  | 3.55E-01 | 8.54E-01 |
| <b>HSPA1B</b>     | -0.24 | 6.31E-01 | 1.00E+00 | -0.55 | 3.55E-01 | 8.54E-01 |
| <b>ELOVL7</b>     | 0.11  | 8.39E-01 | 1.00E+00 | -0.33 | 3.55E-01 | 8.54E-01 |
| <b>SDR9C7</b>     | 0.57  | 3.03E-01 | 1.00E+00 | 0.69  | 3.55E-01 | 8.54E-01 |
| <b>AC073130.1</b> | -0.39 | 9.09E-01 | 1.00E+00 | 1.32  | 3.55E-01 | 8.54E-01 |
| <b>WASHC4</b>     | -0.01 | 9.77E-01 | 1.00E+00 | 0.23  | 3.55E-01 | 8.54E-01 |
| <b>RPL7L1</b>     | -0.15 | 4.14E-01 | 1.00E+00 | 0.21  | 3.55E-01 | 8.54E-01 |
| <b>SCAMP1</b>     | -0.01 | 9.67E-01 | 1.00E+00 | -0.23 | 3.55E-01 | 8.54E-01 |
| <b>EID2</b>       | -0.16 | 4.47E-01 | 1.00E+00 | -0.58 | 3.55E-01 | 8.54E-01 |
| <b>AL158201.1</b> | 0.25  | 9.42E-01 | 1.00E+00 | 0.61  | 3.55E-01 | 8.54E-01 |
| <b>RRN3P1</b>     | 0.05  | 9.32E-01 | 1.00E+00 | -0.52 | 3.55E-01 | 8.54E-01 |
| <b>RUNDC3A</b>    | -0.46 | 3.02E-01 | 1.00E+00 | 0.61  | 3.55E-01 | 8.54E-01 |
| <b>TBC1D8</b>     | 0.36  | 3.96E-01 | 1.00E+00 | 0.41  | 3.55E-01 | 8.54E-01 |
| <b>G19262</b>     | 0.71  | 8.04E-01 | 1.00E+00 | 0.70  | 3.55E-01 | 8.54E-01 |
| <b>CDPF1</b>      | -0.31 | 7.19E-02 | 1.00E+00 | -0.29 | 3.55E-01 | 8.54E-01 |
| <b>SLC2A1</b>     | -0.64 | 9.79E-02 | 1.00E+00 | 0.44  | 3.55E-01 | 8.54E-01 |
| <b>ARHGAP20</b>   | 1.71  | 3.31E-02 | 1.00E+00 | 0.61  | 3.55E-01 | 8.54E-01 |
| <b>MON1A</b>      | -0.05 | 8.44E-01 | 1.00E+00 | -0.21 | 3.55E-01 | 8.54E-01 |
| <b>NTN5</b>       | -0.63 | 5.60E-01 | 1.00E+00 | 1.17  | 3.55E-01 | 8.54E-01 |
| <b>SKIV2L</b>     | -0.23 | 3.42E-01 | 1.00E+00 | 0.41  | 3.55E-01 | 8.54E-01 |
| <b>USP51</b>      | 0.18  | 6.79E-01 | 1.00E+00 | 0.44  | 3.55E-01 | 8.54E-01 |
| <b>PIK3C2B</b>    | 0.03  | 9.06E-01 | 1.00E+00 | 0.39  | 3.55E-01 | 8.54E-01 |
| <b>FBXO38</b>     | 0.02  | 9.33E-01 | 1.00E+00 | -0.16 | 3.55E-01 | 8.54E-01 |
| <b>AC007249.1</b> | -0.21 | 9.09E-01 | 1.00E+00 | 1.19  | 3.55E-01 | 8.54E-01 |
| <b>ALS2CR12</b>   | 0.13  | 9.27E-01 | 1.00E+00 | -1.01 | 3.55E-01 | 8.54E-01 |
| <b>BMP2K</b>      | -0.32 | 3.48E-01 | 1.00E+00 | 0.54  | 3.56E-01 | 8.54E-01 |
| <b>MED30</b>      | 0.06  | 8.20E-01 | 1.00E+00 | -0.31 | 3.56E-01 | 8.54E-01 |
| <b>LIFR</b>       | 0.43  | 2.46E-01 | 1.00E+00 | -0.54 | 3.56E-01 | 8.54E-01 |
| <b>AC104581.4</b> | 0.82  | 2.51E-01 | 1.00E+00 | 0.54  | 3.56E-01 | 8.54E-01 |
| <b>SERTAD3</b>    | -0.44 | 6.68E-02 | 1.00E+00 | 0.12  | 3.56E-01 | 8.54E-01 |
| <b>ZDHC8P1</b>    | -0.31 | 4.63E-01 | 1.00E+00 | -0.68 | 3.56E-01 | 8.54E-01 |

|                   |       |          |          |       |          |          |
|-------------------|-------|----------|----------|-------|----------|----------|
| <b>HNRNPA3P5</b>  | 0.21  | 8.09E-01 | 1.00E+00 | -0.47 | 3.56E-01 | 8.54E-01 |
| <b>DPH1</b>       | -0.32 | 3.23E-01 | 1.00E+00 | -0.32 | 3.56E-01 | 8.54E-01 |
| <b>DNAH1</b>      | -0.11 | 8.08E-01 | 1.00E+00 | 0.90  | 3.56E-01 | 8.54E-01 |
| <b>LINC01535</b>  | -2.54 | 6.36E-02 | 1.00E+00 | -0.84 | 3.56E-01 | 8.54E-01 |
| <b>MTA2</b>       | -0.26 | 3.73E-01 | 1.00E+00 | 0.60  | 3.56E-01 | 8.55E-01 |
| <b>IGLV1-40</b>   | 0.78  | 6.56E-01 | 1.00E+00 | 2.90  | 3.56E-01 | 8.55E-01 |
| <b>TSSC2</b>      | 0.66  | 2.28E-01 | 1.00E+00 | 0.83  | 3.56E-01 | 8.55E-01 |
| <b>LIMA1</b>      | -0.04 | 8.94E-01 | 1.00E+00 | 0.22  | 3.56E-01 | 8.55E-01 |
| <b>P4HA2</b>      | -0.14 | 5.83E-01 | 1.00E+00 | 0.18  | 3.56E-01 | 8.55E-01 |
| <b>ADPRH</b>      | 0.37  | 4.37E-01 | 1.00E+00 | 0.46  | 3.56E-01 | 8.55E-01 |
| <b>XPA</b>        | 0.12  | 5.93E-01 | 1.00E+00 | -0.33 | 3.56E-01 | 8.55E-01 |
| <b>SMG5</b>       | 0.16  | 4.74E-01 | 1.00E+00 | 0.49  | 3.56E-01 | 8.55E-01 |
| <b>CIDEC</b>      | 4.55  | 1.04E-02 | 6.33E-01 | -0.91 | 3.56E-01 | 8.55E-01 |
| <b>DNASE1</b>     | 0.08  | 8.89E-01 | 1.00E+00 | 0.49  | 3.57E-01 | 8.55E-01 |
| <b>AC008533.1</b> | -3.30 | 1.94E-01 | 1.00E+00 | 0.98  | 3.57E-01 | 8.55E-01 |
| <b>HCG11</b>      | 0.57  | 9.71E-02 | 1.00E+00 | 0.28  | 3.57E-01 | 8.55E-01 |
| <b>AC000123.1</b> | 1.46  | 9.75E-02 | 1.00E+00 | 0.98  | 3.57E-01 | 8.55E-01 |
| <b>FOXJ2</b>      | -0.22 | 2.97E-01 | 1.00E+00 | -0.35 | 3.57E-01 | 8.55E-01 |
| <b>AMMECR1</b>    | 0.05  | 8.92E-01 | 1.00E+00 | 0.28  | 3.57E-01 | 8.55E-01 |
| <b>C11orf54</b>   | 0.65  | 1.03E-01 | 1.00E+00 | -0.40 | 3.57E-01 | 8.55E-01 |
| <b>AC105411.1</b> | 0.62  | 5.34E-01 | 1.00E+00 | -0.82 | 3.57E-01 | 8.55E-01 |
| <b>AC010834.3</b> | 0.16  | 8.39E-01 | 1.00E+00 | 0.74  | 3.57E-01 | 8.55E-01 |
| <b>C5orf46</b>    | 0.15  | 7.93E-01 | 1.00E+00 | -0.71 | 3.57E-01 | 8.55E-01 |
| <b>TACR1</b>      | -0.39 | 3.27E-01 | 1.00E+00 | -0.56 | 3.57E-01 | 8.55E-01 |
| <b>LINC00892</b>  | -1.59 | 4.12E-01 | 1.00E+00 | 0.84  | 3.57E-01 | 8.55E-01 |
| <b>TRMT10C</b>    | -0.05 | 7.48E-01 | 1.00E+00 | -0.25 | 3.57E-01 | 8.55E-01 |
| <b>PIGF</b>       | 0.11  | 8.48E-01 | 1.00E+00 | -0.42 | 3.57E-01 | 8.56E-01 |
| <b>PLCE1</b>      | 0.23  | 6.76E-01 | 1.00E+00 | 0.28  | 3.57E-01 | 8.56E-01 |
| <b>SLAIN1</b>     | 0.14  | 7.77E-01 | 1.00E+00 | -0.85 | 3.58E-01 | 8.56E-01 |
| <b>DNAJC9-AS1</b> | 0.22  | 7.51E-01 | 1.00E+00 | -0.56 | 3.58E-01 | 8.56E-01 |
| <b>NEURL1</b>     | -1.42 | 7.65E-03 | 5.36E-01 | 0.40  | 3.58E-01 | 8.56E-01 |
| <b>NUDT3</b>      | -0.51 | 1.58E-01 | 1.00E+00 | 0.82  | 3.58E-01 | 8.56E-01 |

|                   |       |          |          |       |          |          |
|-------------------|-------|----------|----------|-------|----------|----------|
| <b>TSPOAP1</b>    | 0.10  | 8.28E-01 | 1.00E+00 | 0.60  | 3.58E-01 | 8.56E-01 |
| <b>GPR174</b>     | -0.20 | 8.48E-01 | 1.00E+00 | 1.18  | 3.58E-01 | 8.56E-01 |
| <b>SBK3</b>       | -1.16 | 4.91E-01 | 1.00E+00 | 1.44  | 3.58E-01 | 8.56E-01 |
| <b>AP003059.1</b> | -2.02 | 5.55E-01 | 1.00E+00 | -1.20 | 3.58E-01 | 8.56E-01 |
| <b>ABI3BP</b>     | 0.65  | 2.28E-01 | 1.00E+00 | 0.43  | 3.58E-01 | 8.56E-01 |
| <b>PITPNM1</b>    | -0.81 | 1.08E-02 | 6.40E-01 | 0.68  | 3.58E-01 | 8.56E-01 |
| <b>JUND</b>       | -1.25 | 1.05E-02 | 6.33E-01 | -0.65 | 3.58E-01 | 8.56E-01 |
| <b>NOX4</b>       | 1.10  | 1.33E-01 | 1.00E+00 | 0.48  | 3.58E-01 | 8.56E-01 |
| <b>BSPRY</b>      | 0.11  | 7.99E-01 | 1.00E+00 | -0.55 | 3.58E-01 | 8.56E-01 |
| <b>RBM42</b>      | -0.26 | 2.99E-01 | 1.00E+00 | 0.17  | 3.58E-01 | 8.56E-01 |
| <b>LSR</b>        | -0.35 | 2.11E-01 | 1.00E+00 | -0.52 | 3.58E-01 | 8.56E-01 |
| <b>LINC00482</b>  | -0.01 | 9.82E-01 | 1.00E+00 | -0.82 | 3.58E-01 | 8.57E-01 |
| <b>GEMIN7</b>     | -0.04 | 8.97E-01 | 1.00E+00 | -0.36 | 3.58E-01 | 8.57E-01 |
| <b>LSM7</b>       | -0.36 | 6.22E-02 | 1.00E+00 | 0.24  | 3.58E-01 | 8.57E-01 |
| <b>IDS</b>        | 0.23  | 3.04E-01 | 1.00E+00 | 0.17  | 3.59E-01 | 8.57E-01 |
| <b>ZNF316</b>     | -0.20 | 4.47E-01 | 1.00E+00 | 0.62  | 3.59E-01 | 8.57E-01 |
| <b>AC069224.1</b> | 0.00  | 9.92E-01 | 1.00E+00 | -0.81 | 3.59E-01 | 8.57E-01 |
| <b>AC015911.3</b> | 1.34  | 2.82E-01 | 1.00E+00 | 1.09  | 3.59E-01 | 8.57E-01 |
| <b>DDX20</b>      | -0.13 | 5.77E-01 | 1.00E+00 | -0.20 | 3.59E-01 | 8.57E-01 |
| <b>VAT1L</b>      | -1.62 | 5.53E-01 | 1.00E+00 | 0.95  | 3.59E-01 | 8.57E-01 |
| <b>CD81</b>       | 0.28  | 3.30E-01 | 1.00E+00 | 0.44  | 3.59E-01 | 8.57E-01 |
| <b>ZKSCAN7</b>    | -0.20 | 7.33E-01 | 1.00E+00 | 0.79  | 3.59E-01 | 8.57E-01 |
| <b>G34277</b>     | -1.10 | 4.56E-01 | 1.00E+00 | 1.15  | 3.59E-01 | 8.57E-01 |
| <b>FAT3</b>       | -0.86 | 4.12E-02 | 1.00E+00 | -0.93 | 3.59E-01 | 8.57E-01 |
| <b>TGFBR3L</b>    | -0.45 | 4.12E-01 | 1.00E+00 | -0.65 | 3.59E-01 | 8.57E-01 |
| <b>CES1P1</b>     | 0.50  | 5.71E-01 | 1.00E+00 | -0.96 | 3.59E-01 | 8.57E-01 |
| <b>CMTM4</b>      | 0.27  | 6.45E-01 | 1.00E+00 | 0.33  | 3.59E-01 | 8.57E-01 |
| <b>SLFN11</b>     | 0.16  | 7.35E-01 | 1.00E+00 | 0.51  | 3.59E-01 | 8.57E-01 |
| <b>DDX42</b>      | -0.04 | 8.14E-01 | 1.00E+00 | 0.35  | 3.59E-01 | 8.57E-01 |
| <b>AC020661.1</b> | -1.28 | 3.18E-02 | 1.00E+00 | 0.94  | 3.59E-01 | 8.57E-01 |
| <b>SIAE</b>       | -0.04 | 8.48E-01 | 1.00E+00 | 0.54  | 3.59E-01 | 8.57E-01 |
| <b>ACP1</b>       | -0.04 | 7.76E-01 | 1.00E+00 | -0.25 | 3.59E-01 | 8.57E-01 |

|                   |       |          |          |       |          |          |
|-------------------|-------|----------|----------|-------|----------|----------|
| <b>RPL24</b>      | -0.17 | 5.38E-01 | 1.00E+00 | 0.20  | 3.59E-01 | 8.57E-01 |
| <b>FEZ1</b>       | -0.08 | 8.46E-01 | 1.00E+00 | 0.30  | 3.59E-01 | 8.57E-01 |
| <b>EFHD1</b>      | -0.14 | 7.83E-01 | 1.00E+00 | -0.61 | 3.59E-01 | 8.57E-01 |
| <b>ZC3H11B</b>    | -2.14 | 9.64E-02 | 1.00E+00 | -0.51 | 3.59E-01 | 8.57E-01 |
| <b>AL050341.2</b> | 0.20  | 6.03E-01 | 1.00E+00 | -0.48 | 3.59E-01 | 8.57E-01 |
| <b>RRP7A</b>      | -0.01 | 9.67E-01 | 1.00E+00 | 0.22  | 3.59E-01 | 8.57E-01 |
| <b>SP4</b>        | 0.18  | 5.89E-01 | 1.00E+00 | -0.34 | 3.59E-01 | 8.57E-01 |
| <b>HLA-G</b>      | 0.11  | 9.02E-01 | 1.00E+00 | 0.39  | 3.59E-01 | 8.57E-01 |
| <b>FOXO4</b>      | -0.20 | 2.07E-01 | 1.00E+00 | 0.48  | 3.60E-01 | 8.57E-01 |
| <b>ZNF20</b>      | 1.22  | 4.48E-01 | 1.00E+00 | -0.67 | 3.60E-01 | 8.57E-01 |
| <b>CXCL10</b>     | -3.41 | 5.38E-03 | 4.32E-01 | 2.86  | 3.60E-01 | 8.57E-01 |
| <b>AC027702.1</b> | -1.05 | 1.22E-01 | 1.00E+00 | -0.54 | 3.60E-01 | 8.57E-01 |
| <b>CCSER2</b>     | -0.24 | 3.64E-01 | 1.00E+00 | -0.12 | 3.60E-01 | 8.57E-01 |
| <b>AP001033.2</b> | -0.05 | 9.60E-01 | 1.00E+00 | 0.74  | 3.60E-01 | 8.57E-01 |
| <b>SMS</b>        | 0.27  | 1.83E-01 | 1.00E+00 | -0.18 | 3.60E-01 | 8.57E-01 |
| <b>IPO8</b>       | 0.10  | 6.38E-01 | 1.00E+00 | 0.29  | 3.60E-01 | 8.57E-01 |
| <b>TM7SF3</b>     | -0.04 | 8.36E-01 | 1.00E+00 | -0.35 | 3.60E-01 | 8.57E-01 |
| <b>AC006042.3</b> | 1.77  | 1.77E-01 | 1.00E+00 | 0.91  | 3.60E-01 | 8.57E-01 |
| <b>FLJ31356</b>   | -0.38 | 6.96E-01 | 1.00E+00 | 0.88  | 3.60E-01 | 8.57E-01 |
| <b>SOSTDC1</b>    | 0.22  | 6.11E-01 | 1.00E+00 | -0.53 | 3.60E-01 | 8.57E-01 |
| <b>GPR135</b>     | -0.16 | 8.86E-01 | 1.00E+00 | -0.65 | 3.60E-01 | 8.57E-01 |
| <b>AC107072.2</b> | 0.41  | 9.05E-01 | 1.00E+00 | 1.14  | 3.60E-01 | 8.57E-01 |
| <b>SSBP1</b>      | -0.05 | 7.75E-01 | 1.00E+00 | -0.25 | 3.60E-01 | 8.57E-01 |
| <b>G26243</b>     | -0.84 | 5.05E-01 | 1.00E+00 | 1.12  | 3.60E-01 | 8.57E-01 |
| <b>AC068446.2</b> | 1.24  | 2.20E-01 | 1.00E+00 | 0.85  | 3.60E-01 | 8.57E-01 |
| <b>AC022968.1</b> | -0.61 | 8.17E-01 | 1.00E+00 | -0.59 | 3.60E-01 | 8.57E-01 |
| <b>AC107214.1</b> | -1.11 | 1.58E-01 | 1.00E+00 | -0.71 | 3.60E-01 | 8.57E-01 |
| <b>PERP</b>       | 0.03  | 9.39E-01 | 1.00E+00 | -0.46 | 3.60E-01 | 8.57E-01 |
| <b>RNF223</b>     | -0.71 | 3.44E-01 | 1.00E+00 | 0.72  | 3.60E-01 | 8.57E-01 |
| <b>SIGLEC16</b>   | -1.89 | 9.04E-02 | 1.00E+00 | 1.37  | 3.60E-01 | 8.57E-01 |
| <b>CHIC1</b>      | 0.28  | 2.08E-01 | 1.00E+00 | 0.34  | 3.60E-01 | 8.57E-01 |
| <b>ARL2BP</b>     | 0.39  | 4.25E-01 | 1.00E+00 | 0.48  | 3.60E-01 | 8.57E-01 |

|                    |       |          |          |       |          |          |
|--------------------|-------|----------|----------|-------|----------|----------|
| <b>RASGRF2-AS1</b> | -2.56 | 4.55E-01 | 1.00E+00 | 1.14  | 3.60E-01 | 8.57E-01 |
| <b>BROX</b>        | 0.10  | 5.88E-01 | 1.00E+00 | -0.43 | 3.61E-01 | 8.57E-01 |
| <b>AL021707.6</b>  | -0.94 | 5.85E-01 | 1.00E+00 | 1.01  | 3.61E-01 | 8.57E-01 |
| <b>LINC01460</b>   | -0.05 | 9.89E-01 | 1.00E+00 | 1.59  | 3.61E-01 | 8.57E-01 |
| <b>QRICH1</b>      | -0.13 | 5.74E-01 | 1.00E+00 | 0.18  | 3.61E-01 | 8.57E-01 |
| <b>UBE2G1</b>      | 0.19  | 2.37E-01 | 1.00E+00 | -0.20 | 3.61E-01 | 8.57E-01 |
| <b>RIPK3</b>       | -0.53 | 5.17E-02 | 1.00E+00 | 0.32  | 3.61E-01 | 8.57E-01 |
| <b>CBX3</b>        | 0.03  | 9.06E-01 | 1.00E+00 | -0.45 | 3.61E-01 | 8.57E-01 |
| <b>AC097637.2</b>  | -1.55 | 6.52E-01 | 1.00E+00 | -1.38 | 3.61E-01 | 8.57E-01 |
| <b>SLC38A3</b>     | 1.15  | 3.82E-01 | 1.00E+00 | 0.97  | 3.61E-01 | 8.57E-01 |
| <b>FSIP2</b>       | -1.04 | 9.43E-02 | 1.00E+00 | -0.73 | 3.61E-01 | 8.57E-01 |
| <b>LINC00167</b>   | -1.74 | 3.55E-01 | 1.00E+00 | -1.33 | 3.61E-01 | 8.57E-01 |
| <b>AC022868.1</b>  | -2.49 | 9.57E-02 | 1.00E+00 | -0.45 | 3.61E-01 | 8.57E-01 |
| <b>CCT8</b>        | -0.01 | 9.48E-01 | 1.00E+00 | 0.14  | 3.61E-01 | 8.57E-01 |
| <b>KCTD21</b>      | 0.18  | 7.05E-01 | 1.00E+00 | 0.50  | 3.61E-01 | 8.57E-01 |
| <b>YBX2</b>        | -0.04 | 9.53E-01 | 1.00E+00 | -0.66 | 3.61E-01 | 8.57E-01 |
| <b>RGS12</b>       | 0.00  | 9.87E-01 | 1.00E+00 | 0.34  | 3.61E-01 | 8.57E-01 |
| <b>RGS16</b>       | -1.54 | 1.78E-02 | 8.38E-01 | 0.65  | 3.61E-01 | 8.57E-01 |
| <b>ELP3</b>        | 0.20  | 1.97E-01 | 1.00E+00 | -0.19 | 3.61E-01 | 8.57E-01 |
| <b>ABALON</b>      | 0.96  | 3.74E-01 | 1.00E+00 | 0.58  | 3.61E-01 | 8.57E-01 |
| <b>PSMD6</b>       | -0.23 | 3.54E-01 | 1.00E+00 | -0.23 | 3.61E-01 | 8.57E-01 |
| <b>AC092718.4</b>  | -0.45 | 2.59E-01 | 1.00E+00 | 0.43  | 3.61E-01 | 8.57E-01 |
| <b>AC009686.2</b>  | -0.18 | 7.86E-01 | 1.00E+00 | -0.70 | 3.61E-01 | 8.57E-01 |
| <b>ATP6V1C2</b>    | -0.02 | 9.74E-01 | 1.00E+00 | -0.41 | 3.61E-01 | 8.57E-01 |
| <b>LINC02104</b>   | 0.98  | 4.17E-01 | 1.00E+00 | -0.84 | 3.61E-01 | 8.57E-01 |
| <b>AC244502.1</b>  | -1.02 | 7.69E-01 | 1.00E+00 | 0.99  | 3.61E-01 | 8.57E-01 |
| <b>NR1D1</b>       | -1.14 | 4.02E-02 | 1.00E+00 | 0.39  | 3.61E-01 | 8.57E-01 |
| <b>NAPA</b>        | -0.13 | 5.57E-01 | 1.00E+00 | 0.22  | 3.61E-01 | 8.57E-01 |
| <b>AC006449.6</b>  | -0.29 | 2.88E-01 | 1.00E+00 | -0.37 | 3.62E-01 | 8.57E-01 |
| <b>TTLL12</b>      | -0.16 | 5.88E-01 | 1.00E+00 | -0.42 | 3.62E-01 | 8.57E-01 |
| <b>PLIN1</b>       | 4.75  | 4.81E-03 | 4.02E-01 | -0.95 | 3.62E-01 | 8.57E-01 |
| <b>LINC02175</b>   | -0.73 | 3.41E-01 | 1.00E+00 | -0.76 | 3.62E-01 | 8.57E-01 |



|            |       |          |          |       |          |          |
|------------|-------|----------|----------|-------|----------|----------|
| LMO2       | 0.05  | 8.81E-01 | 1.00E+00 | 0.55  | 3.62E-01 | 8.57E-01 |
| TPCN1      | 0.11  | 7.79E-01 | 1.00E+00 | 0.51  | 3.62E-01 | 8.57E-01 |
| AL365226.2 | 0.99  | 2.69E-01 | 1.00E+00 | -0.80 | 3.62E-01 | 8.57E-01 |
| SMCO3      | 1.47  | 8.14E-02 | 1.00E+00 | 1.19  | 3.62E-01 | 8.57E-01 |
| COL20A1    | -0.85 | 5.72E-01 | 1.00E+00 | 1.46  | 3.62E-01 | 8.57E-01 |
| ZNF230     | 0.34  | 3.41E-01 | 1.00E+00 | -0.27 | 3.62E-01 | 8.57E-01 |
| SPCS2      | 0.10  | 5.22E-01 | 1.00E+00 | -0.24 | 3.62E-01 | 8.57E-01 |
| RRP1       | -0.41 | 9.98E-02 | 1.00E+00 | 0.27  | 3.62E-01 | 8.57E-01 |
| TYW1       | -0.06 | 8.13E-01 | 1.00E+00 | 0.17  | 3.62E-01 | 8.57E-01 |
| TRA2B      | 0.05  | 8.17E-01 | 1.00E+00 | -0.14 | 3.62E-01 | 8.57E-01 |
| CCNB3      | -0.34 | 5.02E-01 | 1.00E+00 | 1.07  | 3.62E-01 | 8.57E-01 |
| G4361      | 1.54  | 3.32E-01 | 1.00E+00 | 0.93  | 3.62E-01 | 8.57E-01 |
| ZBED4      | -0.05 | 8.53E-01 | 1.00E+00 | 0.40  | 3.62E-01 | 8.57E-01 |
| G19546     | 2.17  | 3.51E-02 | 1.00E+00 | 1.22  | 3.62E-01 | 8.57E-01 |
| NARF       | -0.08 | 6.40E-01 | 1.00E+00 | -0.21 | 3.62E-01 | 8.57E-01 |
| ATL1       | -0.14 | 6.31E-01 | 1.00E+00 | -0.31 | 3.62E-01 | 8.57E-01 |
| RGMB-AS1   | 0.02  | 9.84E-01 | 1.00E+00 | 0.46  | 3.62E-01 | 8.58E-01 |
| IQUB       | 1.16  | 3.65E-01 | 1.00E+00 | 0.93  | 3.62E-01 | 8.58E-01 |
| G36482     | 0.06  | 9.15E-01 | 1.00E+00 | 0.56  | 3.62E-01 | 8.58E-01 |
| AL139423.1 | -0.14 | 8.83E-01 | 1.00E+00 | -0.75 | 3.62E-01 | 8.58E-01 |
| PBK        | 0.56  | 1.17E-01 | 1.00E+00 | 0.52  | 3.62E-01 | 8.58E-01 |
| AC005253.1 | 1.78  | 3.38E-01 | 1.00E+00 | 1.24  | 3.62E-01 | 8.58E-01 |
| PRKAG2-AS1 | -0.36 | 4.29E-01 | 1.00E+00 | -0.49 | 3.63E-01 | 8.58E-01 |
| AC008731.1 | 0.79  | 7.41E-01 | 1.00E+00 | 0.89  | 3.63E-01 | 8.58E-01 |
| ST7-OT4    | 0.81  | 8.13E-01 | 1.00E+00 | 1.17  | 3.63E-01 | 8.58E-01 |
| GCA        | 0.27  | 4.99E-01 | 1.00E+00 | -0.26 | 3.63E-01 | 8.58E-01 |
| C14orf119  | -0.07 | 7.39E-01 | 1.00E+00 | -0.26 | 3.63E-01 | 8.58E-01 |
| AC090425.2 | -2.30 | 4.59E-01 | 1.00E+00 | -1.06 | 3.63E-01 | 8.58E-01 |
| ADCYAP1    | -2.62 | 2.09E-01 | 1.00E+00 | 1.85  | 3.63E-01 | 8.58E-01 |
| AC023043.1 | -1.48 | 5.15E-01 | 1.00E+00 | -0.70 | 3.63E-01 | 8.58E-01 |
| TRAF5      | 0.10  | 8.16E-01 | 1.00E+00 | 0.32  | 3.63E-01 | 8.58E-01 |
| TRIM74     | -0.16 | 8.82E-01 | 1.00E+00 | -0.84 | 3.63E-01 | 8.58E-01 |

|                   |       |          |          |       |          |          |
|-------------------|-------|----------|----------|-------|----------|----------|
| <b>TOB2P1</b>     | -1.93 | 1.12E-01 | 1.00E+00 | -0.88 | 3.63E-01 | 8.58E-01 |
| <b>IGLV3-1</b>    | 3.22  | 3.29E-01 | 1.00E+00 | 2.87  | 3.63E-01 | 8.58E-01 |
| <b>AC016876.1</b> | -0.12 | 5.91E-01 | 1.00E+00 | 0.40  | 3.63E-01 | 8.58E-01 |
| <b>TROAP</b>      | -0.46 | 3.36E-01 | 1.00E+00 | 0.52  | 3.63E-01 | 8.58E-01 |
| <b>AC036176.3</b> | 0.16  | 9.28E-01 | 1.00E+00 | 0.83  | 3.63E-01 | 8.58E-01 |
| <b>KITLG</b>      | 0.24  | 6.14E-01 | 1.00E+00 | 0.31  | 3.63E-01 | 8.58E-01 |
| <b>SATB1-AS1</b>  | 0.72  | 5.00E-01 | 1.00E+00 | 1.00  | 3.63E-01 | 8.58E-01 |
| <b>CD1D</b>       | 0.04  | 9.63E-01 | 1.00E+00 | 0.80  | 3.63E-01 | 8.58E-01 |
| <b>IPP</b>        | -0.20 | 4.63E-01 | 1.00E+00 | -0.27 | 3.63E-01 | 8.58E-01 |
| <b>AC073529.1</b> | -0.14 | 8.14E-01 | 1.00E+00 | 0.61  | 3.63E-01 | 8.58E-01 |
| <b>PYCR3</b>      | -0.45 | 1.84E-01 | 1.00E+00 | 0.28  | 3.63E-01 | 8.58E-01 |
| <b>AC008687.4</b> | -0.64 | 3.20E-01 | 1.00E+00 | 0.99  | 3.63E-01 | 8.58E-01 |
| <b>TRIM6</b>      | 0.02  | 9.72E-01 | 1.00E+00 | -0.58 | 3.63E-01 | 8.58E-01 |
| <b>FSTL4</b>      | -0.61 | 8.53E-02 | 1.00E+00 | 0.50  | 3.63E-01 | 8.58E-01 |
| <b>VTA1</b>       | -0.02 | 9.32E-01 | 1.00E+00 | -0.34 | 3.63E-01 | 8.58E-01 |
| <b>AC010931.2</b> | -0.93 | 4.44E-01 | 1.00E+00 | -1.04 | 3.63E-01 | 8.58E-01 |
| <b>PPP1R7</b>     | -0.11 | 5.76E-01 | 1.00E+00 | -0.20 | 3.63E-01 | 8.58E-01 |
| <b>PGBD1</b>      | 0.55  | 2.99E-01 | 1.00E+00 | 0.59  | 3.63E-01 | 8.58E-01 |
| <b>FAM133B</b>    | 0.29  | 1.75E-01 | 1.00E+00 | -0.25 | 3.64E-01 | 8.58E-01 |
| <b>SNRNP40</b>    | -0.06 | 7.53E-01 | 1.00E+00 | -0.27 | 3.64E-01 | 8.58E-01 |
| <b>IQANK1</b>     | 0.04  | 9.23E-01 | 1.00E+00 | -0.53 | 3.64E-01 | 8.58E-01 |
| <b>ZMYND19</b>    | -0.25 | 3.94E-01 | 1.00E+00 | -0.58 | 3.64E-01 | 8.58E-01 |
| <b>IARS</b>       | 0.00  | 9.86E-01 | 1.00E+00 | -0.19 | 3.64E-01 | 8.58E-01 |
| <b>AC007601.1</b> | 0.86  | 6.92E-01 | 1.00E+00 | -1.45 | 3.64E-01 | 8.58E-01 |
| <b>AC012065.2</b> | -0.80 | 7.31E-01 | 1.00E+00 | 1.08  | 3.64E-01 | 8.58E-01 |
| <b>STK17B</b>     | 0.42  | 6.83E-02 | 1.00E+00 | 0.20  | 3.64E-01 | 8.58E-01 |
| <b>PLD2</b>       | -0.23 | 3.15E-01 | 1.00E+00 | 0.37  | 3.64E-01 | 8.58E-01 |
| <b>RAF1</b>       | 0.16  | 4.37E-01 | 1.00E+00 | 0.18  | 3.64E-01 | 8.58E-01 |
| <b>PRR13</b>      | 0.09  | 6.39E-01 | 1.00E+00 | -0.37 | 3.64E-01 | 8.58E-01 |
| <b>BTBD10P2</b>   | 0.80  | 6.20E-01 | 1.00E+00 | 1.05  | 3.64E-01 | 8.58E-01 |
| <b>SLC35C1</b>    | 0.13  | 7.12E-01 | 1.00E+00 | 0.49  | 3.64E-01 | 8.58E-01 |
| <b>RAB37</b>      | 0.39  | 5.25E-01 | 1.00E+00 | 0.63  | 3.64E-01 | 8.58E-01 |

|            |       |          |          |       |          |          |
|------------|-------|----------|----------|-------|----------|----------|
| SLC22A18   | -0.48 | 7.18E-02 | 1.00E+00 | 0.28  | 3.64E-01 | 8.58E-01 |
| AL117339.4 | 0.40  | 8.11E-01 | 1.00E+00 | -1.58 | 3.64E-01 | 8.58E-01 |
| AC022098.1 | 0.17  | 6.82E-01 | 1.00E+00 | -0.56 | 3.64E-01 | 8.58E-01 |
| COG3       | 0.33  | 8.82E-02 | 1.00E+00 | -0.18 | 3.64E-01 | 8.58E-01 |
| SBSN       | 0.22  | 6.76E-01 | 1.00E+00 | 0.65  | 3.64E-01 | 8.58E-01 |
| IFNAR1     | 0.14  | 3.53E-01 | 1.00E+00 | -0.21 | 3.64E-01 | 8.58E-01 |
| AP003716.1 | -0.03 | 9.78E-01 | 1.00E+00 | -0.53 | 3.65E-01 | 8.58E-01 |
| SLC35G2    | 0.62  | 1.81E-01 | 1.00E+00 | -0.60 | 3.65E-01 | 8.58E-01 |
| IGIP       | 0.49  | 3.36E-01 | 1.00E+00 | 0.34  | 3.65E-01 | 8.58E-01 |
| PDHX       | 0.21  | 2.58E-01 | 1.00E+00 | -0.22 | 3.65E-01 | 8.58E-01 |
| EFNB3      | -0.84 | 1.08E-02 | 6.42E-01 | -0.35 | 3.65E-01 | 8.58E-01 |
| SCAPER     | -0.06 | 8.24E-01 | 1.00E+00 | -0.19 | 3.65E-01 | 8.58E-01 |
| FOXN3-AS1  | -0.68 | 9.96E-02 | 1.00E+00 | -1.98 | 3.65E-01 | 8.58E-01 |
| ZNF567     | 0.04  | 8.92E-01 | 1.00E+00 | -0.32 | 3.65E-01 | 8.58E-01 |
| KDM1A      | -0.11 | 4.89E-01 | 1.00E+00 | -0.46 | 3.65E-01 | 8.58E-01 |
| CHMP1A     | -0.26 | 3.13E-01 | 1.00E+00 | 0.21  | 3.65E-01 | 8.58E-01 |
| AC005523.1 | 3.78  | 3.98E-02 | 1.00E+00 | -0.89 | 3.65E-01 | 8.58E-01 |
| ERICH5     | 0.36  | 4.45E-01 | 1.00E+00 | -0.61 | 3.65E-01 | 8.58E-01 |
| TAS2R14    | 1.33  | 3.71E-01 | 1.00E+00 | -0.77 | 3.65E-01 | 8.58E-01 |
| MLLT10     | -0.05 | 8.34E-01 | 1.00E+00 | 0.26  | 3.65E-01 | 8.58E-01 |
| UBE2Q2     | 0.10  | 6.37E-01 | 1.00E+00 | -0.26 | 3.65E-01 | 8.59E-01 |
| RNF40      | -0.17 | 3.31E-01 | 1.00E+00 | 0.50  | 3.65E-01 | 8.59E-01 |
| CLMAT3     | -0.36 | 8.86E-01 | 1.00E+00 | -0.69 | 3.65E-01 | 8.59E-01 |
| ENO3       | -0.50 | 3.05E-01 | 1.00E+00 | 0.51  | 3.65E-01 | 8.59E-01 |
| CWC22      | -0.02 | 8.89E-01 | 1.00E+00 | -0.18 | 3.66E-01 | 8.59E-01 |
| MFS13A     | 0.24  | 4.65E-01 | 1.00E+00 | -0.30 | 3.66E-01 | 8.59E-01 |
| TMEM37     | 1.96  | 1.67E-02 | 8.12E-01 | -0.54 | 3.66E-01 | 8.59E-01 |
| AL132656.1 | -0.03 | 9.36E-01 | 1.00E+00 | 0.81  | 3.66E-01 | 8.59E-01 |
| TMEM185AP1 | 0.09  | 9.43E-01 | 1.00E+00 | -0.53 | 3.66E-01 | 8.59E-01 |
| ACRBP      | -0.34 | 4.50E-01 | 1.00E+00 | 0.90  | 3.66E-01 | 8.59E-01 |
| MAB21L3    | -0.22 | 6.71E-01 | 1.00E+00 | -0.53 | 3.66E-01 | 8.59E-01 |
| AMIGO2     | 0.36  | 5.82E-01 | 1.00E+00 | 0.57  | 3.66E-01 | 8.59E-01 |

|                    |       |          |          |       |          |          |
|--------------------|-------|----------|----------|-------|----------|----------|
| <b>BBC3</b>        | -0.32 | 2.30E-01 | 1.00E+00 | 0.50  | 3.66E-01 | 8.59E-01 |
| <b>AP000769.1</b>  | 0.74  | 2.13E-01 | 1.00E+00 | 0.50  | 3.66E-01 | 8.59E-01 |
| <b>FGFRL1</b>      | -0.07 | 8.73E-01 | 1.00E+00 | 0.52  | 3.66E-01 | 8.59E-01 |
| <b>ZNF442</b>      | -0.32 | 5.29E-01 | 1.00E+00 | -0.49 | 3.66E-01 | 8.59E-01 |
| <b>XLOC_006485</b> | 0.76  | 7.56E-01 | 1.00E+00 | 0.92  | 3.66E-01 | 8.59E-01 |
| <b>TM4SF19-AS1</b> | -1.01 | 5.38E-01 | 1.00E+00 | 0.85  | 3.66E-01 | 8.59E-01 |
| <b>AL441992.1</b>  | -0.03 | 9.46E-01 | 1.00E+00 | -0.31 | 3.66E-01 | 8.59E-01 |
| <b>HSPA1L</b>      | 0.22  | 6.02E-01 | 1.00E+00 | 0.45  | 3.66E-01 | 8.59E-01 |
| <b>FADD</b>        | -0.08 | 7.34E-01 | 1.00E+00 | 0.32  | 3.66E-01 | 8.60E-01 |
| <b>CEBPA</b>       | -0.25 | 5.74E-01 | 1.00E+00 | -1.20 | 3.66E-01 | 8.60E-01 |
| <b>EIF3J-DT</b>    | -0.02 | 9.28E-01 | 1.00E+00 | -0.25 | 3.66E-01 | 8.60E-01 |
| <b>FGGY</b>        | -0.21 | 5.63E-01 | 1.00E+00 | -0.31 | 3.66E-01 | 8.60E-01 |
| <b>TMOD2</b>       | -0.06 | 8.76E-01 | 1.00E+00 | 0.38  | 3.66E-01 | 8.60E-01 |
| <b>SLC27A3</b>     | 0.06  | 6.89E-01 | 1.00E+00 | -0.49 | 3.67E-01 | 8.60E-01 |
| <b>MYLK</b>        | 0.10  | 8.53E-01 | 1.00E+00 | -0.29 | 3.67E-01 | 8.60E-01 |
| <b>AL121899.1</b>  | -0.14 | 8.83E-01 | 1.00E+00 | -0.55 | 3.67E-01 | 8.60E-01 |
| <b>ESRG</b>        | 1.22  | 1.16E-01 | 1.00E+00 | -0.74 | 3.67E-01 | 8.60E-01 |
| <b>DENND1C</b>     | -0.02 | 9.65E-01 | 1.00E+00 | 0.64  | 3.67E-01 | 8.60E-01 |
| <b>EBF4</b>        | -0.13 | 7.03E-01 | 1.00E+00 | 0.78  | 3.67E-01 | 8.60E-01 |
| <b>G33057</b>      | 0.39  | 7.82E-01 | 1.00E+00 | 0.96  | 3.67E-01 | 8.60E-01 |
| <b>TNFAIP8L3</b>   | 0.03  | 9.33E-01 | 1.00E+00 | -0.40 | 3.67E-01 | 8.60E-01 |
| <b>CCDC167</b>     | -0.20 | 4.85E-01 | 1.00E+00 | 0.28  | 3.67E-01 | 8.60E-01 |
| <b>SUMO2P17</b>    | -0.54 | 6.30E-01 | 1.00E+00 | -0.49 | 3.67E-01 | 8.60E-01 |
| <b>EFHC1</b>       | 0.15  | 6.81E-01 | 1.00E+00 | -0.26 | 3.67E-01 | 8.60E-01 |
| <b>RABGGTA</b>     | -0.44 | 7.38E-02 | 1.00E+00 | 0.18  | 3.67E-01 | 8.60E-01 |
| <b>XLOC_000076</b> | -0.23 | 6.79E-01 | 1.00E+00 | 0.78  | 3.67E-01 | 8.60E-01 |
| <b>ATAD2B</b>      | -0.03 | 9.38E-01 | 1.00E+00 | -0.26 | 3.67E-01 | 8.60E-01 |
| <b>AC068722.2</b>  | -1.96 | 3.00E-01 | 1.00E+00 | 0.87  | 3.67E-01 | 8.60E-01 |
| <b>GGT5</b>        | -0.41 | 3.46E-01 | 1.00E+00 | 0.57  | 3.67E-01 | 8.60E-01 |
| <b>CCDC112</b>     | -0.07 | 8.26E-01 | 1.00E+00 | -0.24 | 3.67E-01 | 8.60E-01 |
| <b>DHX37</b>       | -0.23 | 3.24E-01 | 1.00E+00 | 0.64  | 3.67E-01 | 8.61E-01 |
| <b>ZDHHC24</b>     | -0.07 | 7.81E-01 | 1.00E+00 | 0.27  | 3.68E-01 | 8.61E-01 |

|                   |       |          |          |       |          |          |
|-------------------|-------|----------|----------|-------|----------|----------|
| <b>SNORD3A</b>    | 0.09  | 9.28E-01 | 1.00E+00 | -0.60 | 3.68E-01 | 8.61E-01 |
| <b>NECTIN1</b>    | -0.30 | 4.31E-01 | 1.00E+00 | 0.56  | 3.68E-01 | 8.61E-01 |
| <b>SHC4</b>       | -0.29 | 5.99E-01 | 1.00E+00 | 0.54  | 3.68E-01 | 8.61E-01 |
| <b>PIP5K1B</b>    | 0.47  | 5.29E-01 | 1.00E+00 | -0.61 | 3.68E-01 | 8.61E-01 |
| <b>EMD</b>        | -0.14 | 5.02E-01 | 1.00E+00 | 0.20  | 3.68E-01 | 8.61E-01 |
| <b>LINC01184</b>  | -0.11 | 6.36E-01 | 1.00E+00 | -0.20 | 3.68E-01 | 8.61E-01 |
| <b>CBWD1</b>      | -0.23 | 3.00E-01 | 1.00E+00 | -0.24 | 3.68E-01 | 8.61E-01 |
| <b>ARFRP1</b>     | 0.13  | 6.14E-01 | 1.00E+00 | 0.24  | 3.68E-01 | 8.61E-01 |
| <b>STAT4</b>      | -0.67 | 3.91E-01 | 1.00E+00 | 0.63  | 3.68E-01 | 8.61E-01 |
| <b>GUK1</b>       | -0.06 | 7.94E-01 | 1.00E+00 | -0.23 | 3.68E-01 | 8.61E-01 |
| <b>CLDN12</b>     | 0.31  | 1.87E-01 | 1.00E+00 | -0.25 | 3.68E-01 | 8.61E-01 |
| <b>NSMF</b>       | -0.33 | 2.92E-01 | 1.00E+00 | 0.50  | 3.68E-01 | 8.61E-01 |
| <b>G40986</b>     | 0.75  | 8.23E-01 | 1.00E+00 | -1.19 | 3.68E-01 | 8.61E-01 |
| <b>AL049840.3</b> | 0.30  | 6.61E-01 | 1.00E+00 | -0.47 | 3.68E-01 | 8.61E-01 |
| <b>CEP104</b>     | -0.07 | 6.62E-01 | 1.00E+00 | -0.35 | 3.68E-01 | 8.61E-01 |
| <b>KIAA0319</b>   | -0.21 | 7.85E-01 | 1.00E+00 | 0.72  | 3.68E-01 | 8.61E-01 |
| <b>OR5BA1P</b>    | 0.24  | 7.97E-01 | 1.00E+00 | 1.13  | 3.68E-01 | 8.61E-01 |
| <b>KIF27</b>      | 0.04  | 9.04E-01 | 1.00E+00 | -0.35 | 3.69E-01 | 8.61E-01 |
| <b>PRPF38B</b>    | 0.16  | 5.08E-01 | 1.00E+00 | 0.25  | 3.69E-01 | 8.61E-01 |
| <b>AC019097.1</b> | -0.51 | 6.39E-01 | 1.00E+00 | 0.53  | 3.69E-01 | 8.62E-01 |
| <b>AC002480.1</b> | -2.65 | 4.30E-01 | 1.00E+00 | 1.30  | 3.69E-01 | 8.62E-01 |
| <b>AC009318.3</b> | 0.46  | 7.10E-01 | 1.00E+00 | 0.67  | 3.69E-01 | 8.62E-01 |
| <b>TMPRSS13</b>   | -0.05 | 9.27E-01 | 1.00E+00 | 0.50  | 3.69E-01 | 8.62E-01 |
| <b>AC017116.2</b> | 0.92  | 4.77E-01 | 1.00E+00 | 0.57  | 3.69E-01 | 8.62E-01 |
| <b>ARHGAP27</b>   | -0.39 | 2.15E-01 | 1.00E+00 | 0.50  | 3.69E-01 | 8.62E-01 |
| <b>SLC22A17</b>   | -0.25 | 5.72E-01 | 1.00E+00 | 0.55  | 3.69E-01 | 8.62E-01 |
| <b>LINC00520</b>  | 0.01  | 9.95E-01 | 1.00E+00 | 0.73  | 3.69E-01 | 8.62E-01 |
| <b>LEPR</b>       | 0.92  | 5.92E-02 | 1.00E+00 | 0.45  | 3.69E-01 | 8.62E-01 |
| <b>NEAT1</b>      | -0.22 | 5.28E-01 | 1.00E+00 | 0.30  | 3.69E-01 | 8.62E-01 |
| <b>RANBP9</b>     | -0.10 | 7.67E-01 | 1.00E+00 | 0.28  | 3.69E-01 | 8.62E-01 |
| <b>RNF135</b>     | -0.08 | 7.38E-01 | 1.00E+00 | -0.17 | 3.69E-01 | 8.62E-01 |
| <b>MYOCD</b>      | -0.16 | 7.94E-01 | 1.00E+00 | -0.63 | 3.69E-01 | 8.62E-01 |

|                    |       |          |          |       |          |          |
|--------------------|-------|----------|----------|-------|----------|----------|
| <b>AC132008.1</b>  | 0.47  | 7.87E-01 | 1.00E+00 | -1.02 | 3.69E-01 | 8.62E-01 |
| PTGER1             | 0.36  | 7.21E-01 | 1.00E+00 | 1.02  | 3.69E-01 | 8.62E-01 |
| <b>AC098818.2</b>  | 1.66  | 3.97E-01 | 1.00E+00 | 0.96  | 3.69E-01 | 8.62E-01 |
| TSPAN2             | 0.09  | 8.28E-01 | 1.00E+00 | -0.24 | 3.69E-01 | 8.62E-01 |
| ADGRD2             | -2.60 | 2.92E-02 | 9.90E-01 | 1.09  | 3.69E-01 | 8.62E-01 |
| OGDHL              | -2.95 | 2.28E-01 | 1.00E+00 | 1.14  | 3.70E-01 | 8.62E-01 |
| <b>AC021106.1</b>  | 0.87  | 1.88E-01 | 1.00E+00 | 0.78  | 3.70E-01 | 8.62E-01 |
| <b>AC008507.1</b>  | 0.99  | 1.92E-01 | 1.00E+00 | -0.60 | 3.70E-01 | 8.62E-01 |
| G31721             | 1.35  | 6.95E-01 | 1.00E+00 | 2.22  | 3.70E-01 | 8.62E-01 |
| ACY3               | -0.96 | 4.62E-01 | 1.00E+00 | 1.18  | 3.70E-01 | 8.62E-01 |
| RPL4               | -0.27 | 4.42E-01 | 1.00E+00 | 0.24  | 3.70E-01 | 8.63E-01 |
| <b>XLOC_003874</b> | -0.43 | 4.86E-01 | 1.00E+00 | -0.71 | 3.70E-01 | 8.63E-01 |
| PPP1R11            | -0.20 | 2.13E-01 | 1.00E+00 | -0.20 | 3.70E-01 | 8.63E-01 |
| CHMP4C             | 0.19  | 6.21E-01 | 1.00E+00 | -0.43 | 3.70E-01 | 8.63E-01 |
| SLC18B1            | 0.30  | 3.21E-01 | 1.00E+00 | 0.19  | 3.70E-01 | 8.63E-01 |
| <b>AC090061.1</b>  | 1.47  | 5.76E-01 | 1.00E+00 | -1.20 | 3.70E-01 | 8.63E-01 |
| CFAP157            | 0.25  | 5.34E-01 | 1.00E+00 | 0.93  | 3.70E-01 | 8.63E-01 |
| GSE1               | -0.38 | 1.68E-01 | 1.00E+00 | 0.26  | 3.70E-01 | 8.63E-01 |
| TAF1               | 0.08  | 7.02E-01 | 1.00E+00 | 0.34  | 3.70E-01 | 8.63E-01 |
| DSTNP2             | -0.43 | 3.09E-01 | 1.00E+00 | 0.30  | 3.70E-01 | 8.63E-01 |
| <b>AL450326.1</b>  | -0.28 | 5.21E-01 | 1.00E+00 | 0.37  | 3.71E-01 | 8.63E-01 |
| <b>AC068647.1</b>  | 0.95  | 8.31E-02 | 1.00E+00 | -0.83 | 3.71E-01 | 8.63E-01 |
| CYYR1              | 0.07  | 8.70E-01 | 1.00E+00 | -0.41 | 3.71E-01 | 8.63E-01 |
| <b>MANEA-DT</b>    | -0.15 | 8.28E-01 | 1.00E+00 | -0.46 | 3.71E-01 | 8.63E-01 |
| CTLA4              | -2.63 | 1.45E-01 | 1.00E+00 | 1.28  | 3.71E-01 | 8.63E-01 |
| STRA6              | 0.34  | 7.93E-01 | 1.00E+00 | 1.06  | 3.71E-01 | 8.63E-01 |
| PIP5K1C            | -0.51 | 5.13E-02 | 1.00E+00 | 0.55  | 3.71E-01 | 8.63E-01 |
| LPCAT3             | -0.24 | 2.53E-01 | 1.00E+00 | -0.21 | 3.71E-01 | 8.63E-01 |
| COA6               | 0.35  | 1.07E-01 | 1.00E+00 | -0.30 | 3.71E-01 | 8.63E-01 |
| SYNCRIP            | -0.17 | 4.11E-01 | 1.00E+00 | 0.15  | 3.71E-01 | 8.63E-01 |
| CCL19              | -0.81 | 2.21E-01 | 1.00E+00 | 0.60  | 3.71E-01 | 8.63E-01 |
| CYTH2              | 0.03  | 8.74E-01 | 1.00E+00 | 0.14  | 3.71E-01 | 8.63E-01 |

|                   |       |          |          |       |          |          |
|-------------------|-------|----------|----------|-------|----------|----------|
| <b>ACTC1</b>      | -2.23 | 1.52E-02 | 7.66E-01 | -0.74 | 3.71E-01 | 8.63E-01 |
| <b>FCGBP</b>      | -0.79 | 1.51E-01 | 1.00E+00 | -0.53 | 3.71E-01 | 8.63E-01 |
| <b>FSBP</b>       | -0.36 | 6.64E-01 | 1.00E+00 | 0.50  | 3.71E-01 | 8.63E-01 |
| <b>DLG5-AS1</b>   | -0.37 | 3.87E-01 | 1.00E+00 | -0.51 | 3.71E-01 | 8.63E-01 |
| <b>AL031274.1</b> | -0.79 | 4.60E-01 | 1.00E+00 | 0.73  | 3.71E-01 | 8.63E-01 |
| <b>SPRED1</b>     | 0.42  | 1.37E-01 | 1.00E+00 | 0.40  | 3.71E-01 | 8.63E-01 |
| <b>INTS6</b>      | 0.00  | 9.99E-01 | 1.00E+00 | -0.26 | 3.71E-01 | 8.63E-01 |
| <b>G16028</b>     | 4.05  | 1.15E-01 | 1.00E+00 | 1.42  | 3.71E-01 | 8.63E-01 |
| <b>ABHD17B</b>    | -0.03 | 9.13E-01 | 1.00E+00 | -0.33 | 3.71E-01 | 8.63E-01 |
| <b>PDE12</b>      | -0.15 | 5.19E-01 | 1.00E+00 | 0.17  | 3.71E-01 | 8.63E-01 |
| <b>TNNI2</b>      | -0.27 | 5.48E-01 | 1.00E+00 | 0.48  | 3.71E-01 | 8.63E-01 |
| <b>AC097523.1</b> | -2.49 | 1.45E-01 | 1.00E+00 | -0.42 | 3.71E-01 | 8.63E-01 |
| <b>CREBZF</b>     | -0.16 | 6.66E-01 | 1.00E+00 | -0.56 | 3.71E-01 | 8.63E-01 |
| <b>MXRA7</b>      | 0.25  | 5.87E-01 | 1.00E+00 | -0.57 | 3.71E-01 | 8.63E-01 |
| <b>ACP7</b>       | 0.45  | 4.99E-01 | 1.00E+00 | 0.63  | 3.71E-01 | 8.63E-01 |
| <b>ZNF780A</b>    | 0.96  | 1.66E-01 | 1.00E+00 | -0.43 | 3.71E-01 | 8.63E-01 |
| <b>HERPUD2</b>    | -0.12 | 5.56E-01 | 1.00E+00 | -0.24 | 3.71E-01 | 8.63E-01 |
| <b>SERPINB4</b>   | -3.24 | 5.27E-04 | 1.04E-01 | 2.80  | 3.72E-01 | 8.63E-01 |
| <b>MEIOB</b>      | 0.59  | 4.95E-01 | 1.00E+00 | -0.67 | 3.72E-01 | 8.64E-01 |
| <b>AC093690.1</b> | -2.34 | 2.67E-01 | 1.00E+00 | -1.00 | 3.72E-01 | 8.64E-01 |
| <b>AL139089.1</b> | 2.59  | 2.26E-01 | 1.00E+00 | -0.93 | 3.72E-01 | 8.64E-01 |
| <b>G7791</b>      | 0.40  | 6.73E-01 | 1.00E+00 | 1.12  | 3.72E-01 | 8.64E-01 |
| <b>CHSY3</b>      | -0.81 | 4.71E-02 | 1.00E+00 | 0.76  | 3.72E-01 | 8.64E-01 |
| <b>HSPD1P6</b>    | -3.36 | 5.25E-02 | 1.00E+00 | -0.92 | 3.72E-01 | 8.64E-01 |
| <b>SDF2</b>       | 0.15  | 3.00E-01 | 1.00E+00 | 0.16  | 3.72E-01 | 8.64E-01 |
| <b>STOML1</b>     | -0.16 | 6.28E-01 | 1.00E+00 | 0.27  | 3.72E-01 | 8.64E-01 |
| <b>RPL4P6</b>     | 0.59  | 4.75E-01 | 1.00E+00 | -0.97 | 3.72E-01 | 8.64E-01 |
| <b>OR7E102P</b>   | -0.52 | 8.59E-01 | 1.00E+00 | -1.39 | 3.72E-01 | 8.64E-01 |
| <b>RPAP1</b>      | -0.15 | 4.57E-01 | 1.00E+00 | -0.37 | 3.72E-01 | 8.64E-01 |
| <b>AP003472.1</b> | -1.55 | 4.54E-01 | 1.00E+00 | -0.76 | 3.72E-01 | 8.64E-01 |
| <b>CCNT1</b>      | 0.32  | 2.44E-01 | 1.00E+00 | 0.28  | 3.72E-01 | 8.64E-01 |
| <b>C10orf67</b>   | 1.04  | 8.10E-02 | 1.00E+00 | 0.74  | 3.73E-01 | 8.64E-01 |

|                      |       |          |          |       |          |          |
|----------------------|-------|----------|----------|-------|----------|----------|
| <b>CTD-2201118.1</b> | 0.62  | 5.97E-01 | 1.00E+00 | -1.16 | 3.73E-01 | 8.64E-01 |
| <b>AP003721.4</b>    | 0.49  | 6.63E-01 | 1.00E+00 | -1.16 | 3.73E-01 | 8.64E-01 |
| <b>AC106795.1</b>    | 0.11  | 7.78E-01 | 1.00E+00 | -0.33 | 3.73E-01 | 8.64E-01 |
| <b>NME1</b>          | 0.10  | 7.39E-01 | 1.00E+00 | -0.39 | 3.73E-01 | 8.64E-01 |
| <b>AC099343.3</b>    | -0.33 | 2.99E-01 | 1.00E+00 | 0.45  | 3.73E-01 | 8.64E-01 |
| <b>FOLR1</b>         | -0.45 | 5.42E-01 | 1.00E+00 | -0.65 | 3.73E-01 | 8.64E-01 |
| <b>POLD4</b>         | 0.11  | 7.62E-01 | 1.00E+00 | 0.38  | 3.73E-01 | 8.64E-01 |
| <b>PIGB</b>          | -0.10 | 7.21E-01 | 1.00E+00 | -0.33 | 3.73E-01 | 8.64E-01 |
| <b>SLX4</b>          | -0.58 | 6.87E-02 | 1.00E+00 | 0.75  | 3.73E-01 | 8.64E-01 |
| <b>FBXL15</b>        | -0.09 | 7.08E-01 | 1.00E+00 | 0.21  | 3.73E-01 | 8.64E-01 |
| <b>AC107959.3</b>    | -0.04 | 9.88E-01 | 1.00E+00 | 1.52  | 3.73E-01 | 8.64E-01 |
| <b>DGKZ</b>          | -0.23 | 3.51E-01 | 1.00E+00 | 0.53  | 3.73E-01 | 8.64E-01 |
| <b>RAB3IP</b>        | 0.12  | 6.12E-01 | 1.00E+00 | -0.24 | 3.73E-01 | 8.64E-01 |
| <b>GZMH</b>          | -0.62 | 4.30E-01 | 1.00E+00 | 0.85  | 3.73E-01 | 8.64E-01 |
| <b>CHAF1A</b>        | 0.02  | 9.28E-01 | 1.00E+00 | -0.37 | 3.73E-01 | 8.64E-01 |
| <b>DNM3</b>          | -0.28 | 4.09E-01 | 1.00E+00 | -0.44 | 3.73E-01 | 8.64E-01 |
| <b>SNX30</b>         | 0.40  | 7.94E-02 | 1.00E+00 | 0.32  | 3.73E-01 | 8.64E-01 |
| <b>AC020910.4</b>    | -0.62 | 1.84E-01 | 1.00E+00 | -0.41 | 3.73E-01 | 8.65E-01 |
| <b>AGER</b>          | -0.16 | 8.33E-01 | 1.00E+00 | 0.89  | 3.73E-01 | 8.65E-01 |
| <b>LINC01343</b>     | -2.44 | 1.25E-01 | 1.00E+00 | 0.98  | 3.73E-01 | 8.65E-01 |
| <b>LAX1</b>          | -0.02 | 9.79E-01 | 1.00E+00 | 0.85  | 3.74E-01 | 8.65E-01 |
| <b>DDX1</b>          | -0.08 | 6.22E-01 | 1.00E+00 | -0.20 | 3.74E-01 | 8.65E-01 |
| <b>AZIN1-AS1</b>     | -0.29 | 5.08E-01 | 1.00E+00 | -0.49 | 3.74E-01 | 8.65E-01 |
| <b>RMDN2</b>         | -0.57 | 1.65E-01 | 1.00E+00 | 0.27  | 3.74E-01 | 8.65E-01 |
| <b>RN7SL600P</b>     | -0.20 | 8.69E-01 | 1.00E+00 | 0.76  | 3.74E-01 | 8.65E-01 |
| <b>MRPL40</b>        | -0.18 | 3.26E-01 | 1.00E+00 | -0.26 | 3.74E-01 | 8.65E-01 |
| <b>TAGLN</b>         | -0.47 | 4.08E-01 | 1.00E+00 | 0.39  | 3.74E-01 | 8.65E-01 |
| <b>NPPC</b>          | -3.45 | 2.59E-03 | 2.61E-01 | -0.73 | 3.74E-01 | 8.65E-01 |
| <b>PTGES3P3</b>      | -1.52 | 6.60E-01 | 1.00E+00 | -0.55 | 3.74E-01 | 8.65E-01 |
| <b>DLGAP1-AS1</b>    | 0.54  | 2.03E-01 | 1.00E+00 | 0.39  | 3.74E-01 | 8.65E-01 |
| <b>ACTG1P23</b>      | -1.52 | 6.60E-01 | 1.00E+00 | 0.78  | 3.74E-01 | 8.65E-01 |
| <b>ZMYND8</b>        | 0.02  | 9.19E-01 | 1.00E+00 | 0.21  | 3.74E-01 | 8.65E-01 |



|                   |       |          |          |       |          |          |
|-------------------|-------|----------|----------|-------|----------|----------|
| <b>SGMS2</b>      | 0.19  | 4.31E-01 | 1.00E+00 | 0.26  | 3.74E-01 | 8.65E-01 |
| <b>IGHV3-21</b>   | 1.06  | 7.61E-01 | 1.00E+00 | 2.83  | 3.74E-01 | 8.65E-01 |
| <b>MIF-AS1</b>    | -0.56 | 6.09E-01 | 1.00E+00 | -0.82 | 3.74E-01 | 8.65E-01 |
| <b>PLPP7</b>      | 0.28  | 6.07E-01 | 1.00E+00 | 0.43  | 3.74E-01 | 8.65E-01 |
| <b>LURAP1</b>     | -0.27 | 5.72E-01 | 1.00E+00 | 0.41  | 3.74E-01 | 8.65E-01 |
| <b>DDX5</b>       | -0.26 | 1.82E-01 | 1.00E+00 | 0.17  | 3.74E-01 | 8.65E-01 |
| <b>EAPP</b>       | -0.11 | 6.05E-01 | 1.00E+00 | -0.31 | 3.74E-01 | 8.65E-01 |
| <b>B4GALNT2</b>   | 0.24  | 6.84E-01 | 1.00E+00 | -0.80 | 3.74E-01 | 8.65E-01 |
| <b>SYN3</b>       | -0.10 | 8.66E-01 | 1.00E+00 | -0.75 | 3.74E-01 | 8.65E-01 |
| <b>AC005264.1</b> | -0.32 | 8.23E-01 | 1.00E+00 | 1.19  | 3.74E-01 | 8.65E-01 |
| <b>SH3TC1</b>     | -0.47 | 1.86E-01 | 1.00E+00 | 0.78  | 3.74E-01 | 8.65E-01 |
| <b>AL139158.2</b> | 0.02  | 9.60E-01 | 1.00E+00 | -0.50 | 3.74E-01 | 8.65E-01 |
| <b>ZNF257</b>     | 0.43  | 5.22E-01 | 1.00E+00 | -0.54 | 3.75E-01 | 8.65E-01 |
| <b>AC107241.1</b> | 2.25  | 3.37E-01 | 1.00E+00 | 0.96  | 3.75E-01 | 8.66E-01 |
| <b>AC008391.1</b> | 0.04  | 9.75E-01 | 1.00E+00 | 0.81  | 3.75E-01 | 8.66E-01 |
| <b>DNMT3B</b>     | -0.41 | 3.15E-01 | 1.00E+00 | 0.58  | 3.75E-01 | 8.66E-01 |
| <b>MAP3K13</b>    | -0.05 | 7.74E-01 | 1.00E+00 | -0.22 | 3.75E-01 | 8.66E-01 |
| <b>ZNF490</b>     | -0.33 | 3.93E-01 | 1.00E+00 | 0.39  | 3.75E-01 | 8.66E-01 |
| <b>DIO1</b>       | -2.41 | 3.77E-01 | 1.00E+00 | 1.12  | 3.75E-01 | 8.66E-01 |
| <b>ZNF470</b>     | -0.21 | 5.78E-01 | 1.00E+00 | -0.26 | 3.75E-01 | 8.66E-01 |
| <b>AL356056.3</b> | -0.80 | 6.90E-01 | 1.00E+00 | -0.61 | 3.75E-01 | 8.67E-01 |
| <b>GNLY</b>       | -1.61 | 2.08E-02 | 8.94E-01 | 0.69  | 3.75E-01 | 8.67E-01 |
| <b>CEBPB-AS1</b>  | 0.00  | 9.94E-01 | 1.00E+00 | -0.74 | 3.75E-01 | 8.67E-01 |
| <b>GTF2IRD2B</b>  | -0.02 | 9.56E-01 | 1.00E+00 | -0.42 | 3.75E-01 | 8.67E-01 |
| <b>RAB4B</b>      | -2.25 | 2.04E-01 | 1.00E+00 | 0.70  | 3.76E-01 | 8.67E-01 |
| <b>ELL</b>        | -0.21 | 4.29E-01 | 1.00E+00 | 0.48  | 3.76E-01 | 8.67E-01 |
| <b>MAPK12</b>     | -0.35 | 4.96E-01 | 1.00E+00 | 0.78  | 3.76E-01 | 8.67E-01 |
| <b>TRPM6</b>      | 0.41  | 3.90E-01 | 1.00E+00 | 0.69  | 3.76E-01 | 8.67E-01 |
| <b>AC087257.1</b> | -0.79 | 6.16E-01 | 1.00E+00 | 0.99  | 3.76E-01 | 8.67E-01 |
| <b>NEK8</b>       | -0.26 | 4.87E-01 | 1.00E+00 | 0.34  | 3.76E-01 | 8.67E-01 |
| <b>E2F7</b>       | -0.51 | 5.36E-01 | 1.00E+00 | 0.56  | 3.76E-01 | 8.67E-01 |
| <b>EXOC4</b>      | 0.03  | 9.16E-01 | 1.00E+00 | 0.24  | 3.76E-01 | 8.67E-01 |

|                    |       |          |          |       |          |          |
|--------------------|-------|----------|----------|-------|----------|----------|
| <b>AP001107.5</b>  | -0.67 | 5.25E-01 | 1.00E+00 | 0.89  | 3.76E-01 | 8.67E-01 |
| <b>TRIP10</b>      | 0.09  | 7.48E-01 | 1.00E+00 | 0.36  | 3.76E-01 | 8.67E-01 |
| <b>AC068481.1</b>  | 1.51  | 4.95E-01 | 1.00E+00 | -0.87 | 3.76E-01 | 8.67E-01 |
| <b>XLOC_001309</b> | 0.85  | 2.34E-01 | 1.00E+00 | -0.67 | 3.76E-01 | 8.67E-01 |
| <b>SMC1B</b>       | -1.70 | 2.75E-01 | 1.00E+00 | -0.89 | 3.76E-01 | 8.67E-01 |
| <b>MS4A2</b>       | 0.61  | 3.71E-01 | 1.00E+00 | 0.59  | 3.76E-01 | 8.68E-01 |
| <b>NDUFB10</b>     | -0.14 | 4.44E-01 | 1.00E+00 | -0.18 | 3.76E-01 | 8.68E-01 |
| <b>STARD10</b>     | -0.18 | 4.72E-01 | 1.00E+00 | -0.33 | 3.76E-01 | 8.68E-01 |
| <b>TRIM61</b>      | 2.37  | 9.73E-02 | 1.00E+00 | 1.00  | 3.77E-01 | 8.68E-01 |
| <b>ZNF711</b>      | -0.07 | 8.65E-01 | 1.00E+00 | -0.48 | 3.77E-01 | 8.68E-01 |
| <b>ESYT3</b>       | 0.20  | 7.26E-01 | 1.00E+00 | 0.46  | 3.77E-01 | 8.68E-01 |
| <b>ELMOD3</b>      | 1.47  | 3.03E-02 | 1.00E+00 | -0.55 | 3.77E-01 | 8.68E-01 |
| <b>ZNF367</b>      | -0.45 | 1.87E-01 | 1.00E+00 | -0.53 | 3.77E-01 | 8.68E-01 |
| <b>MUC1</b>        | -0.83 | 1.20E-01 | 1.00E+00 | 0.70  | 3.77E-01 | 8.68E-01 |
| <b>MMP16</b>       | 0.13  | 8.27E-01 | 1.00E+00 | -0.48 | 3.77E-01 | 8.68E-01 |
| <b>ZFP37</b>       | 0.60  | 3.73E-01 | 1.00E+00 | 0.59  | 3.77E-01 | 8.68E-01 |
| <b>SYNRG</b>       | -0.09 | 6.63E-01 | 1.00E+00 | 0.31  | 3.77E-01 | 8.68E-01 |
| <b>PLEKHF1</b>     | -0.02 | 9.39E-01 | 1.00E+00 | 0.43  | 3.77E-01 | 8.68E-01 |
| <b>GID8</b>        | 0.12  | 6.51E-01 | 1.00E+00 | 0.25  | 3.77E-01 | 8.68E-01 |
| <b>SNORA77</b>     | 0.88  | 4.28E-01 | 1.00E+00 | 0.95  | 3.77E-01 | 8.68E-01 |
| <b>MT-ND2</b>      | -0.04 | 9.26E-01 | 1.00E+00 | -0.28 | 3.77E-01 | 8.68E-01 |
| <b>TRDMT1</b>      | -0.29 | 2.53E-01 | 1.00E+00 | -0.32 | 3.77E-01 | 8.68E-01 |
| <b>ZNF721</b>      | -0.30 | 4.28E-01 | 1.00E+00 | -0.26 | 3.77E-01 | 8.68E-01 |
| <b>AC024941.2</b>  | 0.69  | 8.22E-01 | 1.00E+00 | -0.95 | 3.77E-01 | 8.68E-01 |
| <b>CD82</b>        | -0.02 | 9.34E-01 | 1.00E+00 | 0.19  | 3.77E-01 | 8.68E-01 |
| <b>XLOC_007051</b> | 1.67  | 6.26E-01 | 1.00E+00 | -1.52 | 3.77E-01 | 8.68E-01 |
| <b>TIMP3</b>       | 0.71  | 1.35E-01 | 1.00E+00 | -0.47 | 3.77E-01 | 8.68E-01 |
| <b>GLIPR1L1</b>    | 1.49  | 2.12E-01 | 1.00E+00 | -0.61 | 3.77E-01 | 8.68E-01 |
| <b>PAIP2</b>       | 0.24  | 2.54E-01 | 1.00E+00 | -0.35 | 3.77E-01 | 8.68E-01 |
| <b>AC112777.1</b>  | -0.19 | 5.37E-01 | 1.00E+00 | 0.62  | 3.77E-01 | 8.68E-01 |
| <b>RPS15P5</b>     | 1.02  | 7.67E-01 | 1.00E+00 | -0.72 | 3.77E-01 | 8.68E-01 |
| <b>NRBP1</b>       | -0.10 | 5.93E-01 | 1.00E+00 | 0.13  | 3.78E-01 | 8.68E-01 |

|                    |       |          |          |       |          |          |
|--------------------|-------|----------|----------|-------|----------|----------|
| <b>DNAJB2</b>      | 0.24  | 4.34E-01 | 1.00E+00 | 0.43  | 3.78E-01 | 8.68E-01 |
| <b>ANGPTL8</b>     | 5.11  | 2.44E-02 | 9.22E-01 | -1.00 | 3.78E-01 | 8.68E-01 |
| <b>SHB</b>         | -0.24 | 4.67E-01 | 1.00E+00 | 0.50  | 3.78E-01 | 8.68E-01 |
| <b>AC024075.1</b>  | -0.05 | 9.39E-01 | 1.00E+00 | 0.46  | 3.78E-01 | 8.68E-01 |
| <b>RPS27AP11</b>   | -0.10 | 9.61E-01 | 1.00E+00 | -0.68 | 3.78E-01 | 8.68E-01 |
| <b>SLN</b>         | 0.66  | 4.79E-01 | 1.00E+00 | 0.89  | 3.78E-01 | 8.68E-01 |
| <b>SEC23A</b>      | 0.34  | 2.28E-01 | 1.00E+00 | -0.32 | 3.78E-01 | 8.68E-01 |
| <b>BBOF1</b>       | -0.10 | 7.68E-01 | 1.00E+00 | -0.27 | 3.78E-01 | 8.68E-01 |
| <b>FZD10-DT</b>    | 0.12  | 7.76E-01 | 1.00E+00 | 0.40  | 3.78E-01 | 8.68E-01 |
| <b>GRIA2</b>       | -0.24 | 8.82E-01 | 1.00E+00 | -0.91 | 3.78E-01 | 8.68E-01 |
| <b>PWAR6</b>       | -0.52 | 4.50E-01 | 1.00E+00 | -0.66 | 3.78E-01 | 8.68E-01 |
| <b>YOD1</b>        | 0.37  | 5.35E-01 | 1.00E+00 | 0.41  | 3.78E-01 | 8.68E-01 |
| <b>TMEM8A</b>      | -0.15 | 7.11E-01 | 1.00E+00 | 0.64  | 3.78E-01 | 8.68E-01 |
| <b>AL133355.1</b>  | -0.01 | 9.87E-01 | 1.00E+00 | 0.48  | 3.78E-01 | 8.68E-01 |
| <b>ZNF32</b>       | 0.09  | 7.31E-01 | 1.00E+00 | -0.13 | 3.78E-01 | 8.68E-01 |
| <b>SPDYE21P</b>    | -0.44 | 6.84E-01 | 1.00E+00 | 0.43  | 3.78E-01 | 8.68E-01 |
| <b>EML6</b>        | -0.74 | 1.82E-01 | 1.00E+00 | 0.65  | 3.78E-01 | 8.68E-01 |
| <b>PDE8B</b>       | -0.19 | 6.89E-01 | 1.00E+00 | -0.42 | 3.78E-01 | 8.68E-01 |
| <b>SMC2</b>        | -0.17 | 4.98E-01 | 1.00E+00 | -0.13 | 3.78E-01 | 8.68E-01 |
| <b>POMP</b>        | 0.08  | 6.86E-01 | 1.00E+00 | -0.32 | 3.78E-01 | 8.68E-01 |
| <b>LINC01956</b>   | -0.45 | 5.21E-01 | 1.00E+00 | -0.46 | 3.78E-01 | 8.68E-01 |
| <b>MRPL4</b>       | -0.24 | 3.44E-01 | 1.00E+00 | 0.19  | 3.78E-01 | 8.68E-01 |
| <b>G10846</b>      | -0.58 | 5.00E-01 | 1.00E+00 | -0.59 | 3.78E-01 | 8.68E-01 |
| <b>LPGAT1</b>      | 0.68  | 1.77E-01 | 1.00E+00 | -0.39 | 3.78E-01 | 8.68E-01 |
| <b>GFRA1</b>       | 0.92  | 7.42E-02 | 1.00E+00 | 0.42  | 3.78E-01 | 8.68E-01 |
| <b>DIRC3</b>       | 0.65  | 3.41E-01 | 1.00E+00 | -0.41 | 3.78E-01 | 8.68E-01 |
| <b>AL354993.1</b>  | 0.48  | 7.94E-01 | 1.00E+00 | -0.85 | 3.78E-01 | 8.68E-01 |
| <b>LINC01133</b>   | -0.35 | 2.97E-01 | 1.00E+00 | -0.43 | 3.78E-01 | 8.68E-01 |
| <b>LINC00511</b>   | -0.80 | 5.20E-02 | 1.00E+00 | 0.44  | 3.78E-01 | 8.68E-01 |
| <b>VSIG1</b>       | -0.86 | 2.69E-01 | 1.00E+00 | 1.03  | 3.78E-01 | 8.68E-01 |
| <b>XLOC_012301</b> | -0.59 | 6.62E-01 | 1.00E+00 | -1.21 | 3.79E-01 | 8.68E-01 |
| <b>WDR4</b>        | -0.33 | 2.35E-01 | 1.00E+00 | 0.27  | 3.79E-01 | 8.68E-01 |

|                    |       |          |          |       |          |          |
|--------------------|-------|----------|----------|-------|----------|----------|
| <b>AC008429.2</b>  | -0.09 | 9.78E-01 | 1.00E+00 | -0.50 | 3.79E-01 | 8.68E-01 |
| <b>FUT2</b>        | 0.12  | 7.58E-01 | 1.00E+00 | 0.47  | 3.79E-01 | 8.68E-01 |
| <b>DPM2</b>        | -0.23 | 3.29E-01 | 1.00E+00 | 0.15  | 3.79E-01 | 8.68E-01 |
| <b>NUDT2</b>       | -0.56 | 2.50E-02 | 9.28E-01 | -0.22 | 3.79E-01 | 8.68E-01 |
| <b>AC074134.1</b>  | 2.53  | 4.56E-01 | 1.00E+00 | 1.17  | 3.79E-01 | 8.68E-01 |
| <b>STRCP1</b>      | -3.78 | 3.53E-03 | 3.20E-01 | -1.06 | 3.79E-01 | 8.68E-01 |
| <b>ASB11</b>       | -0.17 | 8.53E-01 | 1.00E+00 | -0.80 | 3.79E-01 | 8.68E-01 |
| <b>MYH9</b>        | -0.29 | 2.13E-01 | 1.00E+00 | 0.52  | 3.79E-01 | 8.68E-01 |
| <b>TET1</b>        | -0.52 | 2.60E-01 | 1.00E+00 | -0.41 | 3.79E-01 | 8.68E-01 |
| <b>KNTC1</b>       | -0.12 | 6.75E-01 | 1.00E+00 | 0.34  | 3.79E-01 | 8.68E-01 |
| <b>RPL7P1</b>      | 0.05  | 8.69E-01 | 1.00E+00 | -0.48 | 3.79E-01 | 8.68E-01 |
| <b>DSG4</b>        | -1.95 | 6.91E-02 | 1.00E+00 | -1.13 | 3.79E-01 | 8.68E-01 |
| <b>GLTPD2</b>      | -0.94 | 5.82E-02 | 1.00E+00 | 0.80  | 3.79E-01 | 8.68E-01 |
| <b>PPP2R1B</b>     | 0.88  | 6.36E-02 | 1.00E+00 | -0.28 | 3.79E-01 | 8.68E-01 |
| <b>CCDC39</b>      | 0.44  | 7.13E-01 | 1.00E+00 | 0.88  | 3.79E-01 | 8.68E-01 |
| <b>ALG1L9P</b>     | -0.67 | 2.14E-01 | 1.00E+00 | 0.62  | 3.79E-01 | 8.68E-01 |
| <b>MSTO1</b>       | 0.18  | 6.95E-01 | 1.00E+00 | -0.38 | 3.79E-01 | 8.68E-01 |
| <b>G31097</b>      | -1.25 | 1.58E-01 | 1.00E+00 | -0.63 | 3.79E-01 | 8.68E-01 |
| <b>XLOC_008366</b> | 1.49  | 5.28E-01 | 1.00E+00 | 1.03  | 3.79E-01 | 8.68E-01 |
| <b>AC017104.1</b>  | -0.51 | 6.02E-01 | 1.00E+00 | 1.23  | 3.79E-01 | 8.68E-01 |
| <b>ZC2HC1C</b>     | 0.01  | 9.76E-01 | 1.00E+00 | -0.58 | 3.79E-01 | 8.68E-01 |
| <b>AUH</b>         | 0.31  | 2.77E-01 | 1.00E+00 | -0.31 | 3.79E-01 | 8.68E-01 |
| <b>LINC01422</b>   | 0.10  | 9.39E-01 | 1.00E+00 | -1.05 | 3.79E-01 | 8.68E-01 |
| <b>CCNE1</b>       | -0.86 | 7.82E-02 | 1.00E+00 | 0.62  | 3.79E-01 | 8.68E-01 |
| <b>MIR3150BHG</b>  | -0.36 | 7.01E-01 | 1.00E+00 | 0.82  | 3.79E-01 | 8.68E-01 |
| <b>NIPBL-DT</b>    | 0.41  | 2.36E-01 | 1.00E+00 | -0.40 | 3.79E-01 | 8.68E-01 |
| <b>STMN3</b>       | -0.26 | 3.81E-01 | 1.00E+00 | 0.51  | 3.79E-01 | 8.68E-01 |
| <b>MRPL2</b>       | 0.00  | 9.95E-01 | 1.00E+00 | -0.18 | 3.79E-01 | 8.68E-01 |
| <b>AC087741.2</b>  | -2.93 | 2.81E-01 | 1.00E+00 | -0.57 | 3.80E-01 | 8.68E-01 |
| <b>ACTA1</b>       | -1.56 | 1.98E-01 | 1.00E+00 | -0.79 | 3.80E-01 | 8.68E-01 |
| <b>XLOC_008703</b> | 0.49  | 8.86E-01 | 1.00E+00 | 1.13  | 3.80E-01 | 8.68E-01 |
| <b>MAP4K2</b>      | -0.08 | 7.35E-01 | 1.00E+00 | 0.31  | 3.80E-01 | 8.68E-01 |

|                   |       |          |          |       |          |          |
|-------------------|-------|----------|----------|-------|----------|----------|
| <b>AC115522.1</b> | -0.27 | 5.73E-01 | 1.00E+00 | 0.44  | 3.80E-01 | 8.68E-01 |
| <b>PPP1R14B</b>   | -0.13 | 6.71E-01 | 1.00E+00 | -0.54 | 3.80E-01 | 8.68E-01 |
| <b>C9orf72</b>    | 0.19  | 5.62E-01 | 1.00E+00 | 0.23  | 3.80E-01 | 8.68E-01 |
| <b>FAM208B</b>    | -0.42 | 2.55E-02 | 9.29E-01 | 0.36  | 3.80E-01 | 8.68E-01 |
| <b>RASSF9</b>     | -0.75 | 4.53E-02 | 1.00E+00 | -0.35 | 3.80E-01 | 8.68E-01 |
| <b>DUSP12</b>     | -0.09 | 7.47E-01 | 1.00E+00 | 0.21  | 3.80E-01 | 8.68E-01 |
| <b>AC004951.1</b> | -1.19 | 2.74E-01 | 1.00E+00 | -0.59 | 3.80E-01 | 8.68E-01 |
| <b>AKAP9</b>      | -0.01 | 9.73E-01 | 1.00E+00 | -0.28 | 3.80E-01 | 8.68E-01 |
| <b>C22orf34</b>   | -0.08 | 8.95E-01 | 1.00E+00 | 0.69  | 3.80E-01 | 8.68E-01 |
| <b>PAQR4</b>      | -0.54 | 1.98E-01 | 1.00E+00 | -0.58 | 3.80E-01 | 8.68E-01 |
| <b>AZIN2</b>      | -0.01 | 9.91E-01 | 1.00E+00 | 0.55  | 3.80E-01 | 8.68E-01 |
| <b>MRPS33</b>     | -0.02 | 9.02E-01 | 1.00E+00 | -0.25 | 3.80E-01 | 8.68E-01 |
| <b>COQ7</b>       | 0.19  | 5.25E-01 | 1.00E+00 | -0.17 | 3.80E-01 | 8.68E-01 |
| <b>KCND2</b>      | 0.53  | 4.99E-01 | 1.00E+00 | 0.66  | 3.80E-01 | 8.68E-01 |
| <b>AC124283.4</b> | 0.04  | 9.81E-01 | 1.00E+00 | 1.02  | 3.80E-01 | 8.68E-01 |
| <b>SWI5</b>       | 0.03  | 9.29E-01 | 1.00E+00 | -0.21 | 3.80E-01 | 8.68E-01 |
| <b>SLC35D1</b>    | 0.45  | 1.98E-01 | 1.00E+00 | 0.19  | 3.80E-01 | 8.68E-01 |
| <b>ELP1</b>       | 0.27  | 2.25E-01 | 1.00E+00 | 0.25  | 3.80E-01 | 8.68E-01 |
| <b>KCTD15</b>     | -0.03 | 9.42E-01 | 1.00E+00 | 0.34  | 3.80E-01 | 8.68E-01 |
| <b>CARD18</b>     | -0.08 | 9.18E-01 | 1.00E+00 | -0.58 | 3.80E-01 | 8.68E-01 |
| <b>THRAP3</b>     | -0.08 | 7.31E-01 | 1.00E+00 | 0.18  | 3.81E-01 | 8.68E-01 |
| <b>MINOS1P3</b>   | 0.36  | 9.17E-01 | 1.00E+00 | 1.49  | 3.81E-01 | 8.68E-01 |
| <b>TP53TG3D</b>   | -1.62 | 1.85E-01 | 1.00E+00 | -0.79 | 3.81E-01 | 8.68E-01 |
| <b>AMPH</b>       | -0.14 | 8.37E-01 | 1.00E+00 | 0.65  | 3.81E-01 | 8.68E-01 |
| <b>PPP6R1</b>     | -0.21 | 3.86E-01 | 1.00E+00 | 0.68  | 3.81E-01 | 8.68E-01 |
| <b>MTFMT</b>      | 0.01  | 9.68E-01 | 1.00E+00 | 0.17  | 3.81E-01 | 8.68E-01 |
| <b>ZBTB18</b>     | -0.07 | 7.13E-01 | 1.00E+00 | 0.39  | 3.81E-01 | 8.68E-01 |
| <b>GKN1</b>       | -2.77 | 1.89E-01 | 1.00E+00 | -1.58 | 3.81E-01 | 8.68E-01 |
| <b>DLEU1</b>      | 0.07  | 8.36E-01 | 1.00E+00 | -0.36 | 3.81E-01 | 8.68E-01 |
| <b>LINC00663</b>  | -1.38 | 3.32E-01 | 1.00E+00 | -0.58 | 3.81E-01 | 8.68E-01 |
| <b>AC087516.2</b> | 0.09  | 9.58E-01 | 1.00E+00 | -1.17 | 3.81E-01 | 8.68E-01 |
| <b>RPF2</b>       | 0.07  | 7.64E-01 | 1.00E+00 | -0.23 | 3.81E-01 | 8.68E-01 |

|             |       |          |          |       |          |          |
|-------------|-------|----------|----------|-------|----------|----------|
| RANBP6      | -0.06 | 8.06E-01 | 1.00E+00 | -0.23 | 3.81E-01 | 8.68E-01 |
| C10orf88    | -0.14 | 6.09E-01 | 1.00E+00 | -0.24 | 3.81E-01 | 8.68E-01 |
| RPL12P44    | -0.83 | 8.07E-01 | 1.00E+00 | -0.81 | 3.81E-01 | 8.68E-01 |
| TNFRSF25    | 0.59  | 3.32E-01 | 1.00E+00 | 0.57  | 3.81E-01 | 8.68E-01 |
| AL512625.3  | -2.14 | 4.76E-01 | 1.00E+00 | -1.09 | 3.81E-01 | 8.68E-01 |
| SPINK8      | -0.40 | 8.85E-01 | 1.00E+00 | -1.67 | 3.81E-01 | 8.68E-01 |
| IRX4        | -0.61 | 7.54E-02 | 1.00E+00 | -0.69 | 3.81E-01 | 8.68E-01 |
| AC136621.1  | 0.56  | 3.68E-01 | 1.00E+00 | -0.87 | 3.81E-01 | 8.68E-01 |
| XLOC_003405 | 0.97  | 3.13E-01 | 1.00E+00 | -1.06 | 3.81E-01 | 8.68E-01 |
| G42447      | 0.43  | 7.76E-01 | 1.00E+00 | -0.80 | 3.81E-01 | 8.68E-01 |
| AC009063.3  | -2.54 | 1.95E-01 | 1.00E+00 | 0.77  | 3.81E-01 | 8.68E-01 |
| RGS9BP      | 0.10  | 8.79E-01 | 1.00E+00 | -0.87 | 3.81E-01 | 8.68E-01 |
| RHOC        | 0.01  | 9.72E-01 | 1.00E+00 | 0.18  | 3.81E-01 | 8.68E-01 |
| IGLV1-44    | 3.64  | 2.31E-03 | 2.43E-01 | 2.75  | 3.81E-01 | 8.68E-01 |
| GABRP       | -0.13 | 8.52E-01 | 1.00E+00 | 0.70  | 3.81E-01 | 8.68E-01 |
| SPRR3       | -1.24 | 7.17E-01 | 1.00E+00 | 2.78  | 3.82E-01 | 8.68E-01 |
| ABCA6       | 0.47  | 3.53E-01 | 1.00E+00 | 0.44  | 3.82E-01 | 8.68E-01 |
| SLFN13      | 0.01  | 9.78E-01 | 1.00E+00 | 0.31  | 3.82E-01 | 8.68E-01 |
| RAET1E      | 0.08  | 9.03E-01 | 1.00E+00 | 0.47  | 3.82E-01 | 8.68E-01 |
| PSG5        | 0.56  | 6.91E-01 | 1.00E+00 | -0.88 | 3.82E-01 | 8.68E-01 |
| HELLPAR     | 1.00  | 3.67E-01 | 1.00E+00 | -0.60 | 3.82E-01 | 8.68E-01 |
| CRACR2B     | 0.32  | 6.49E-01 | 1.00E+00 | -0.36 | 3.82E-01 | 8.68E-01 |
| ABCA9       | 0.31  | 6.13E-01 | 1.00E+00 | 0.59  | 3.82E-01 | 8.68E-01 |
| LINC01451   | -0.99 | 3.29E-01 | 1.00E+00 | -0.66 | 3.82E-01 | 8.68E-01 |
| ACTG1P10    | -1.39 | 3.60E-01 | 1.00E+00 | -1.13 | 3.82E-01 | 8.68E-01 |
| IL25        | -3.90 | 4.29E-02 | 1.00E+00 | -1.08 | 3.82E-01 | 8.68E-01 |
| MT-TF       | 0.51  | 5.27E-01 | 1.00E+00 | -0.38 | 3.82E-01 | 8.68E-01 |
| RGS7        | 2.37  | 4.34E-02 | 1.00E+00 | 1.31  | 3.82E-01 | 8.68E-01 |
| CHID1       | 0.03  | 8.94E-01 | 1.00E+00 | 0.11  | 3.82E-01 | 8.68E-01 |
| RAI1        | -0.71 | 3.27E-02 | 1.00E+00 | 0.72  | 3.82E-01 | 8.68E-01 |
| ALKBH7      | -0.08 | 7.44E-01 | 1.00E+00 | 0.16  | 3.82E-01 | 8.68E-01 |
| AC016831.6  | 0.96  | 4.35E-01 | 1.00E+00 | 0.56  | 3.82E-01 | 8.68E-01 |

|                    |       |          |          |       |          |          |
|--------------------|-------|----------|----------|-------|----------|----------|
| <b>AL355607.1</b>  | -1.13 | 6.37E-01 | 1.00E+00 | -1.14 | 3.82E-01 | 8.68E-01 |
| <b>APBB3</b>       | -0.43 | 2.23E-01 | 1.00E+00 | 0.37  | 3.82E-01 | 8.68E-01 |
| <b>G43312</b>      | 1.48  | 8.75E-02 | 1.00E+00 | -0.82 | 3.82E-01 | 8.68E-01 |
| <b>FAM131A</b>     | -0.11 | 7.62E-01 | 1.00E+00 | 0.35  | 3.82E-01 | 8.68E-01 |
| <b>SPATA21</b>     | 1.96  | 3.42E-01 | 1.00E+00 | 1.04  | 3.82E-01 | 8.68E-01 |
| <b>AC079305.1</b>  | -0.47 | 5.89E-01 | 1.00E+00 | 0.55  | 3.82E-01 | 8.68E-01 |
| <b>TIMM17B</b>     | 0.01  | 9.39E-01 | 1.00E+00 | 0.17  | 3.82E-01 | 8.68E-01 |
| <b>DLG3</b>        | 0.16  | 2.79E-01 | 1.00E+00 | -0.41 | 3.82E-01 | 8.68E-01 |
| <b>SNX14</b>       | 0.17  | 3.24E-01 | 1.00E+00 | -0.17 | 3.82E-01 | 8.68E-01 |
| <b>AP005264.5</b>  | -2.36 | 8.04E-02 | 1.00E+00 | -0.74 | 3.82E-01 | 8.68E-01 |
| <b>G36605</b>      | 0.19  | 8.29E-01 | 1.00E+00 | 0.76  | 3.82E-01 | 8.68E-01 |
| <b>RPGRIP1L</b>    | -0.01 | 9.86E-01 | 1.00E+00 | 0.30  | 3.83E-01 | 8.68E-01 |
| <b>WFIKK2</b>      | 2.55  | 3.06E-03 | 2.89E-01 | 0.91  | 3.83E-01 | 8.68E-01 |
| <b>EIF3H</b>       | -0.17 | 5.21E-01 | 1.00E+00 | 0.15  | 3.83E-01 | 8.68E-01 |
| <b>SNX27</b>       | 0.32  | 1.85E-01 | 1.00E+00 | -0.24 | 3.83E-01 | 8.68E-01 |
| <b>1-Mar</b>       | 2.36  | 5.27E-02 | 1.00E+00 | -0.78 | 3.83E-01 | 8.68E-01 |
| <b>MINCR</b>       | 0.43  | 3.17E-01 | 1.00E+00 | -0.43 | 3.83E-01 | 8.68E-01 |
| <b>TNIP3</b>       | -1.31 | 5.49E-01 | 1.00E+00 | 1.06  | 3.83E-01 | 8.68E-01 |
| <b>LINC00476</b>   | -0.07 | 8.53E-01 | 1.00E+00 | -0.26 | 3.83E-01 | 8.69E-01 |
| <b>ARFGAP2</b>     | 0.13  | 5.79E-01 | 1.00E+00 | 0.14  | 3.83E-01 | 8.69E-01 |
| <b>HNRNPA1P48</b>  | -0.12 | 7.14E-01 | 1.00E+00 | -0.25 | 3.83E-01 | 8.69E-01 |
| <b>LYPD2</b>       | 0.43  | 4.16E-01 | 1.00E+00 | 0.55  | 3.83E-01 | 8.69E-01 |
| <b>HMG1</b>        | 0.00  | 9.88E-01 | 1.00E+00 | -0.19 | 3.83E-01 | 8.69E-01 |
| <b>XLOC_001642</b> | -0.85 | 5.92E-01 | 1.00E+00 | 0.94  | 3.83E-01 | 8.69E-01 |
| <b>OTX1</b>        | -0.27 | 4.01E-01 | 1.00E+00 | -0.41 | 3.83E-01 | 8.69E-01 |
| <b>RIC8B</b>       | -0.04 | 9.16E-01 | 1.00E+00 | -0.29 | 3.83E-01 | 8.69E-01 |
| <b>RAB11FIP5</b>   | 0.06  | 7.76E-01 | 1.00E+00 | 0.47  | 3.83E-01 | 8.69E-01 |
| <b>PIR</b>         | 0.11  | 6.71E-01 | 1.00E+00 | -0.24 | 3.83E-01 | 8.69E-01 |
| <b>RPL18</b>       | -0.21 | 4.82E-01 | 1.00E+00 | 0.27  | 3.83E-01 | 8.69E-01 |
| <b>TMEM245</b>     | 0.65  | 5.17E-02 | 1.00E+00 | -0.26 | 3.83E-01 | 8.69E-01 |
| <b>HOXA7</b>       | -0.40 | 3.24E-01 | 1.00E+00 | -0.43 | 3.83E-01 | 8.69E-01 |
| <b>GABPB1-IT1</b>  | -0.17 | 4.96E-01 | 1.00E+00 | -0.50 | 3.84E-01 | 8.69E-01 |

|                    |       |          |          |       |          |          |
|--------------------|-------|----------|----------|-------|----------|----------|
| <b>PFDN6</b>       | -0.10 | 6.09E-01 | 1.00E+00 | 0.26  | 3.84E-01 | 8.69E-01 |
| <b>MAP3K11</b>     | -0.42 | 2.63E-02 | 9.46E-01 | 0.56  | 3.84E-01 | 8.69E-01 |
| <b>ZNRD1ASP</b>    | 0.33  | 5.29E-01 | 1.00E+00 | 0.44  | 3.84E-01 | 8.69E-01 |
| <b>SUCNR1</b>      | 0.56  | 4.32E-01 | 1.00E+00 | -0.50 | 3.84E-01 | 8.69E-01 |
| <b>HMGN1P4</b>     | 0.54  | 7.73E-01 | 1.00E+00 | -0.56 | 3.84E-01 | 8.69E-01 |
| <b>SOCS4</b>       | 0.09  | 7.41E-01 | 1.00E+00 | -0.19 | 3.84E-01 | 8.69E-01 |
| <b>VPS11</b>       | 0.09  | 6.14E-01 | 1.00E+00 | 0.13  | 3.84E-01 | 8.69E-01 |
| <b>DECR2</b>       | 0.15  | 7.07E-01 | 1.00E+00 | -0.21 | 3.84E-01 | 8.69E-01 |
| <b>SCARA3</b>      | -0.04 | 8.91E-01 | 1.00E+00 | 0.56  | 3.84E-01 | 8.69E-01 |
| <b>CCDC130</b>     | -0.42 | 1.40E-01 | 1.00E+00 | 0.24  | 3.84E-01 | 8.69E-01 |
| <b>RAB6D</b>       | 1.06  | 7.61E-01 | 1.00E+00 | -0.58 | 3.84E-01 | 8.69E-01 |
| <b>AC011476.3</b>  | 0.07  | 9.25E-01 | 1.00E+00 | 0.66  | 3.84E-01 | 8.69E-01 |
| <b>CLTA</b>        | 0.00  | 9.78E-01 | 1.00E+00 | 0.20  | 3.84E-01 | 8.69E-01 |
| <b>APOBEC3F</b>    | -0.28 | 4.99E-01 | 1.00E+00 | 0.41  | 3.84E-01 | 8.69E-01 |
| <b>G35698</b>      | 0.15  | 9.04E-01 | 1.00E+00 | -0.83 | 3.84E-01 | 8.69E-01 |
| <b>LINC01484</b>   | 2.60  | 1.76E-01 | 1.00E+00 | -1.00 | 3.84E-01 | 8.69E-01 |
| <b>GZF1</b>        | -0.11 | 6.60E-01 | 1.00E+00 | 0.34  | 3.84E-01 | 8.69E-01 |
| <b>ST20-AS1</b>    | -0.44 | 4.93E-01 | 1.00E+00 | -0.53 | 3.84E-01 | 8.69E-01 |
| <b>TTC27</b>       | 0.02  | 9.06E-01 | 1.00E+00 | -0.18 | 3.84E-01 | 8.69E-01 |
| <b>XLOC_002585</b> | 1.62  | 5.35E-02 | 1.00E+00 | 0.91  | 3.84E-01 | 8.69E-01 |
| <b>TUBG2</b>       | 0.03  | 9.45E-01 | 1.00E+00 | 0.21  | 3.84E-01 | 8.69E-01 |
| <b>C9orf41-AS1</b> | 1.88  | 3.76E-01 | 1.00E+00 | -0.60 | 3.85E-01 | 8.69E-01 |
| <b>USB1</b>        | -0.25 | 2.38E-01 | 1.00E+00 | 0.26  | 3.85E-01 | 8.69E-01 |
| <b>AC109454.2</b>  | -0.34 | 8.07E-01 | 1.00E+00 | -0.52 | 3.85E-01 | 8.69E-01 |
| <b>AC093390.1</b>  | -2.09 | 1.19E-01 | 1.00E+00 | 1.14  | 3.85E-01 | 8.69E-01 |
| <b>TYK2</b>        | -0.04 | 8.58E-01 | 1.00E+00 | 0.51  | 3.85E-01 | 8.69E-01 |
| <b>AC007364.1</b>  | 0.56  | 8.71E-01 | 1.00E+00 | -0.84 | 3.85E-01 | 8.69E-01 |
| <b>SLC35G1</b>     | 0.36  | 3.98E-01 | 1.00E+00 | -0.34 | 3.85E-01 | 8.69E-01 |
| <b>DNAJB11</b>     | -0.10 | 5.26E-01 | 1.00E+00 | 0.20  | 3.85E-01 | 8.69E-01 |
| <b>PCTP</b>        | 0.52  | 1.59E-01 | 1.00E+00 | 0.31  | 3.85E-01 | 8.69E-01 |
| <b>LINC00654</b>   | 0.79  | 2.43E-01 | 1.00E+00 | 0.84  | 3.85E-01 | 8.69E-01 |
| <b>AC115618.2</b>  | -0.24 | 2.07E-01 | 1.00E+00 | 0.73  | 3.85E-01 | 8.70E-01 |



|                    |       |          |          |       |          |          |
|--------------------|-------|----------|----------|-------|----------|----------|
| <b>AP000568.1</b>  | -0.06 | 9.86E-01 | 1.00E+00 | -0.73 | 3.85E-01 | 8.70E-01 |
| <b>LINC01224</b>   | -0.16 | 8.88E-01 | 1.00E+00 | -1.06 | 3.85E-01 | 8.70E-01 |
| <b>NES</b>         | 0.03  | 9.47E-01 | 1.00E+00 | 0.70  | 3.85E-01 | 8.70E-01 |
| <b>MTMR9LP</b>     | -0.17 | 8.23E-01 | 1.00E+00 | 0.60  | 3.85E-01 | 8.70E-01 |
| <b>ZNF30</b>       | -0.04 | 9.31E-01 | 1.00E+00 | 0.35  | 3.85E-01 | 8.70E-01 |
| <b>C8orf33</b>     | 0.19  | 3.11E-01 | 1.00E+00 | -0.16 | 3.85E-01 | 8.70E-01 |
| <b>ZNF277</b>      | -0.11 | 6.68E-01 | 1.00E+00 | 0.18  | 3.85E-01 | 8.70E-01 |
| <b>TSPAN5</b>      | 0.26  | 4.97E-01 | 1.00E+00 | -0.34 | 3.86E-01 | 8.70E-01 |
| <b>NFE2</b>        | 0.54  | 6.88E-01 | 1.00E+00 | 0.47  | 3.86E-01 | 8.70E-01 |
| <b>DUSP22</b>      | 0.13  | 3.99E-01 | 1.00E+00 | -0.10 | 3.86E-01 | 8.70E-01 |
| <b>CNEP1R1</b>     | 0.23  | 4.99E-01 | 1.00E+00 | -0.24 | 3.86E-01 | 8.70E-01 |
| <b>LRRC8A</b>      | -0.12 | 5.44E-01 | 1.00E+00 | 0.28  | 3.86E-01 | 8.70E-01 |
| <b>ZNF79</b>       | -0.43 | 1.58E-01 | 1.00E+00 | 0.49  | 3.86E-01 | 8.70E-01 |
| <b>STUM</b>        | -0.26 | 4.72E-01 | 1.00E+00 | -0.59 | 3.86E-01 | 8.70E-01 |
| <b>TIFAB</b>       | -0.27 | 7.64E-01 | 1.00E+00 | 2.67  | 3.86E-01 | 8.70E-01 |
| <b>DEXI</b>        | -0.26 | 5.10E-01 | 1.00E+00 | 0.87  | 3.86E-01 | 8.70E-01 |
| <b>ARHGEF40</b>    | 0.23  | 5.93E-01 | 1.00E+00 | 0.53  | 3.86E-01 | 8.70E-01 |
| <b>XLOC_008667</b> | 0.34  | 7.81E-01 | 1.00E+00 | -0.90 | 3.86E-01 | 8.70E-01 |
| <b>TOX4P1</b>      | -1.60 | 6.43E-01 | 1.00E+00 | -1.05 | 3.86E-01 | 8.70E-01 |
| <b>GLTP</b>        | 0.14  | 7.31E-01 | 1.00E+00 | -0.35 | 3.86E-01 | 8.70E-01 |
| <b>MCC</b>         | -0.31 | 3.50E-01 | 1.00E+00 | -0.22 | 3.86E-01 | 8.70E-01 |
| <b>FHDC1</b>       | -0.19 | 7.10E-01 | 1.00E+00 | 0.54  | 3.86E-01 | 8.70E-01 |
| <b>G0S2</b>        | 4.01  | 5.87E-03 | 4.57E-01 | -0.69 | 3.86E-01 | 8.70E-01 |
| <b>KIAA1324</b>    | 0.05  | 9.48E-01 | 1.00E+00 | -0.59 | 3.86E-01 | 8.70E-01 |
| <b>MFSD4A</b>      | 0.05  | 9.29E-01 | 1.00E+00 | -0.42 | 3.86E-01 | 8.70E-01 |
| <b>GNL3L</b>       | -0.07 | 7.85E-01 | 1.00E+00 | -0.34 | 3.86E-01 | 8.70E-01 |
| <b>AJM1</b>        | -1.01 | 2.24E-01 | 1.00E+00 | 0.34  | 3.86E-01 | 8.70E-01 |
| <b>OGFR</b>        | -0.11 | 6.98E-01 | 1.00E+00 | 0.83  | 3.86E-01 | 8.70E-01 |
| <b>TMEM71</b>      | 0.67  | 6.29E-02 | 1.00E+00 | 0.44  | 3.86E-01 | 8.70E-01 |
| <b>SLC26A1</b>     | 0.34  | 6.03E-01 | 1.00E+00 | 0.90  | 3.86E-01 | 8.70E-01 |
| <b>BVES</b>        | 0.47  | 3.87E-01 | 1.00E+00 | 0.53  | 3.86E-01 | 8.70E-01 |
| <b>UQCR10</b>      | 0.07  | 6.77E-01 | 1.00E+00 | -0.36 | 3.86E-01 | 8.70E-01 |

|                   |       |          |          |       |          |          |
|-------------------|-------|----------|----------|-------|----------|----------|
| <b>HSPA4</b>      | -0.03 | 8.61E-01 | 1.00E+00 | 0.22  | 3.86E-01 | 8.70E-01 |
| <b>BX284668.4</b> | -2.53 | 6.40E-02 | 1.00E+00 | -0.69 | 3.86E-01 | 8.70E-01 |
| <b>CCDC81</b>     | -2.76 | 3.03E-02 | 1.00E+00 | 0.82  | 3.86E-01 | 8.70E-01 |
| <b>SLC7A5</b>     | -0.76 | 1.14E-01 | 1.00E+00 | 0.62  | 3.86E-01 | 8.70E-01 |
| <b>PGAM1P8</b>    | 0.59  | 4.65E-01 | 1.00E+00 | 0.88  | 3.86E-01 | 8.70E-01 |
| <b>DNALI1</b>     | 0.74  | 1.77E-01 | 1.00E+00 | 0.37  | 3.87E-01 | 8.70E-01 |
| <b>AARSD1</b>     | 0.21  | 8.79E-01 | 1.00E+00 | 0.65  | 3.87E-01 | 8.70E-01 |
| <b>DNAJB4</b>     | 0.35  | 2.71E-01 | 1.00E+00 | -0.26 | 3.87E-01 | 8.70E-01 |
| <b>SPRR2G</b>     | -0.82 | 2.86E-01 | 1.00E+00 | 2.71  | 3.87E-01 | 8.70E-01 |
| <b>ADRA2B</b>     | -0.32 | 6.31E-01 | 1.00E+00 | -0.97 | 3.87E-01 | 8.70E-01 |
| <b>MSMB</b>       | 0.03  | 9.67E-01 | 1.00E+00 | -0.82 | 3.87E-01 | 8.70E-01 |
| <b>VPS16</b>      | -0.19 | 3.70E-01 | 1.00E+00 | 0.19  | 3.87E-01 | 8.70E-01 |
| <b>VPS45</b>      | -0.05 | 7.91E-01 | 1.00E+00 | -0.16 | 3.87E-01 | 8.70E-01 |
| <b>LINC01909</b>  | -0.27 | 9.16E-01 | 1.00E+00 | 1.00  | 3.87E-01 | 8.70E-01 |
| <b>PARD3-AS1</b>  | 0.96  | 2.47E-01 | 1.00E+00 | -0.70 | 3.87E-01 | 8.70E-01 |
| <b>ADAMTS3</b>    | -0.41 | 3.84E-01 | 1.00E+00 | 0.79  | 3.87E-01 | 8.70E-01 |
| <b>AL122035.2</b> | -1.06 | 2.37E-01 | 1.00E+00 | 0.82  | 3.87E-01 | 8.70E-01 |
| <b>AC108463.1</b> | 1.67  | 3.71E-01 | 1.00E+00 | 1.14  | 3.87E-01 | 8.70E-01 |
| <b>TMEM234</b>    | 0.53  | 1.50E-01 | 1.00E+00 | 0.29  | 3.87E-01 | 8.71E-01 |
| <b>AC105446.1</b> | NA    | NA       | NA       | -0.78 | 3.87E-01 | 8.71E-01 |
| <b>C2orf73</b>    | 2.84  | 2.39E-02 | 9.18E-01 | 1.16  | 3.87E-01 | 8.71E-01 |
| <b>CEBPA-DT</b>   | -0.35 | 7.51E-01 | 1.00E+00 | -0.52 | 3.87E-01 | 8.71E-01 |
| <b>CFAP70</b>     | -1.28 | 2.23E-03 | 2.39E-01 | -0.62 | 3.87E-01 | 8.71E-01 |
| <b>IZUMO4</b>     | -0.36 | 4.91E-01 | 1.00E+00 | -0.41 | 3.88E-01 | 8.71E-01 |
| <b>NR2C2</b>      | 0.20  | 5.41E-01 | 1.00E+00 | 0.31  | 3.88E-01 | 8.71E-01 |
| <b>LINC00578</b>  | -1.99 | 7.75E-02 | 1.00E+00 | -0.55 | 3.88E-01 | 8.71E-01 |
| <b>ADRA2A</b>     | 0.32  | 4.45E-01 | 1.00E+00 | 0.68  | 3.88E-01 | 8.71E-01 |
| <b>ANO7L1</b>     | 0.15  | 7.47E-01 | 1.00E+00 | 0.29  | 3.88E-01 | 8.71E-01 |
| <b>DHRS4L2</b>    | -0.34 | 2.50E-01 | 1.00E+00 | -0.19 | 3.88E-01 | 8.71E-01 |
| <b>LMO3</b>       | 0.52  | 6.18E-01 | 1.00E+00 | -0.82 | 3.88E-01 | 8.71E-01 |
| <b>ANO2</b>       | 0.39  | 3.26E-01 | 1.00E+00 | 0.89  | 3.88E-01 | 8.71E-01 |
| <b>ZNF853</b>     | 0.03  | 9.43E-01 | 1.00E+00 | 0.66  | 3.88E-01 | 8.71E-01 |

|                    |        |          |          |       |          |          |
|--------------------|--------|----------|----------|-------|----------|----------|
| <b>AL121761.1</b>  | 0.03   | 9.72E-01 | 1.00E+00 | -0.61 | 3.88E-01 | 8.71E-01 |
| <b>ERAP1</b>       | -0.22  | 4.45E-01 | 1.00E+00 | 0.24  | 3.88E-01 | 8.71E-01 |
| <b>TRIM68</b>      | 0.16   | 5.10E-01 | 1.00E+00 | -0.37 | 3.88E-01 | 8.71E-01 |
| <b>GRK6</b>        | 0.01   | 9.77E-01 | 1.00E+00 | 0.43  | 3.88E-01 | 8.71E-01 |
| <b>URGCP</b>       | -0.01  | 9.70E-01 | 1.00E+00 | 0.22  | 3.88E-01 | 8.71E-01 |
| <b>IGLV3-21</b>    | 7.59   | 5.71E-15 | 4.43E-12 | 2.71  | 3.88E-01 | 8.71E-01 |
| <b>UBQLN2</b>      | -0.21  | 2.22E-01 | 1.00E+00 | -0.18 | 3.88E-01 | 8.71E-01 |
| <b>XLOC_000263</b> | -2.47  | 4.70E-01 | 1.00E+00 | 1.40  | 3.88E-01 | 8.71E-01 |
| <b>LILRB1</b>      | -0.60  | 3.83E-01 | 1.00E+00 | 2.70  | 3.88E-01 | 8.71E-01 |
| <b>RN7SL4P</b>     | -1.35  | 6.55E-01 | 1.00E+00 | -1.00 | 3.88E-01 | 8.71E-01 |
| <b>PCSK9</b>       | -1.14  | 9.25E-02 | 1.00E+00 | -0.80 | 3.88E-01 | 8.71E-01 |
| <b>LILRA2</b>      | -1.66  | 7.36E-02 | 1.00E+00 | 2.17  | 3.88E-01 | 8.71E-01 |
| <b>RHAG</b>        | -2.24  | 9.13E-02 | 1.00E+00 | 1.38  | 3.88E-01 | 8.71E-01 |
| <b>MT-ND3</b>      | 0.07   | 8.81E-01 | 1.00E+00 | -0.34 | 3.89E-01 | 8.71E-01 |
| <b>THBS3</b>       | 0.11   | 8.12E-01 | 1.00E+00 | 0.46  | 3.89E-01 | 8.71E-01 |
| <b>MMP1</b>        | 0.06   | 9.74E-01 | 1.00E+00 | 2.71  | 3.89E-01 | 8.71E-01 |
| <b>TMC5</b>        | 0.55   | 2.36E-01 | 1.00E+00 | -0.44 | 3.89E-01 | 8.71E-01 |
| <b>AL357515.1</b>  | -0.25  | 9.07E-01 | 1.00E+00 | 0.76  | 3.89E-01 | 8.71E-01 |
| <b>BTBD1</b>       | -0.11  | 5.91E-01 | 1.00E+00 | -0.56 | 3.89E-01 | 8.71E-01 |
| <b>ZNF83</b>       | -0.03  | 9.07E-01 | 1.00E+00 | -0.21 | 3.89E-01 | 8.71E-01 |
| <b>BCL6B</b>       | 0.16   | 7.47E-01 | 1.00E+00 | 0.49  | 3.89E-01 | 8.71E-01 |
| <b>AC079062.1</b>  | -10.73 | 1.72E-03 | 2.29E-01 | 2.01  | 3.89E-01 | 8.71E-01 |
| <b>ZNF160</b>      | 0.06   | 8.12E-01 | 1.00E+00 | -0.19 | 3.89E-01 | 8.71E-01 |
| <b>MIR3648</b>     | -0.03  | 9.59E-01 | 1.00E+00 | -1.31 | 3.89E-01 | 8.71E-01 |
| <b>RBPMS2</b>      | -0.12  | 8.61E-01 | 1.00E+00 | -0.51 | 3.89E-01 | 8.72E-01 |
| <b>MPPED1</b>      | -0.89  | 3.87E-01 | 1.00E+00 | -0.74 | 3.89E-01 | 8.72E-01 |
| <b>SPDYE2</b>      | -1.08  | 4.23E-01 | 1.00E+00 | 0.47  | 3.89E-01 | 8.72E-01 |
| <b>CPA2</b>        | 7.37   | 1.02E-02 | 6.27E-01 | 1.10  | 3.89E-01 | 8.72E-01 |
| <b>OTUD6B</b>      | -0.01  | 9.72E-01 | 1.00E+00 | -0.21 | 3.89E-01 | 8.72E-01 |
| <b>ZNF619</b>      | 0.27   | 4.36E-01 | 1.00E+00 | 0.33  | 3.89E-01 | 8.72E-01 |
| <b>TRPV1</b>       | 0.27   | 6.45E-01 | 1.00E+00 | 0.76  | 3.89E-01 | 8.72E-01 |
| <b>FAM222B</b>     | -0.39  | 4.55E-02 | 1.00E+00 | 0.25  | 3.89E-01 | 8.72E-01 |

|                   |       |          |          |       |          |          |
|-------------------|-------|----------|----------|-------|----------|----------|
| <b>PRUNE2</b>     | -0.25 | 6.85E-01 | 1.00E+00 | 0.40  | 3.89E-01 | 8.72E-01 |
| <b>G16904</b>     | 0.43  | 6.40E-01 | 1.00E+00 | 1.16  | 3.89E-01 | 8.72E-01 |
| <b>TOMM70</b>     | 0.04  | 7.73E-01 | 1.00E+00 | -0.31 | 3.90E-01 | 8.72E-01 |
| <b>MYOSLID</b>    | -0.90 | 6.32E-01 | 1.00E+00 | 0.64  | 3.90E-01 | 8.72E-01 |
| <b>C10orf105</b>  | 1.49  | 1.59E-01 | 1.00E+00 | 1.03  | 3.90E-01 | 8.72E-01 |
| <b>TUBB6</b>      | -0.09 | 6.55E-01 | 1.00E+00 | 0.25  | 3.90E-01 | 8.72E-01 |
| <b>AC004024.1</b> | -0.70 | 8.10E-01 | 1.00E+00 | -0.77 | 3.90E-01 | 8.72E-01 |
| <b>BMS1P8</b>     | 3.94  | 3.21E-02 | 1.00E+00 | 0.51  | 3.90E-01 | 8.72E-01 |
| <b>ECM2</b>       | 0.94  | 9.48E-03 | 6.06E-01 | 0.42  | 3.90E-01 | 8.72E-01 |
| <b>TRAPPC2B</b>   | 0.49  | 1.29E-01 | 1.00E+00 | -0.45 | 3.90E-01 | 8.72E-01 |
| <b>CROCCP3</b>    | -0.65 | 2.55E-01 | 1.00E+00 | 0.56  | 3.90E-01 | 8.72E-01 |
| <b>ELOA-AS1</b>   | -1.56 | 1.95E-01 | 1.00E+00 | -0.52 | 3.90E-01 | 8.72E-01 |
| <b>GNB2</b>       | -0.12 | 6.42E-01 | 1.00E+00 | 0.47  | 3.90E-01 | 8.72E-01 |
| <b>PREB</b>       | 0.22  | 4.04E-01 | 1.00E+00 | -0.31 | 3.90E-01 | 8.72E-01 |
| <b>ST8SIA5</b>    | -5.15 | 6.66E-04 | 1.23E-01 | -1.09 | 3.90E-01 | 8.72E-01 |
| <b>C6orf48</b>    | -0.10 | 7.72E-01 | 1.00E+00 | 0.53  | 3.90E-01 | 8.72E-01 |
| <b>SLC31A2</b>    | 0.05  | 9.36E-01 | 1.00E+00 | 0.55  | 3.90E-01 | 8.72E-01 |
| <b>FAM169A</b>    | -1.25 | 6.27E-02 | 1.00E+00 | 0.91  | 3.90E-01 | 8.72E-01 |
| <b>FARS2</b>      | -0.27 | 3.29E-01 | 1.00E+00 | 0.13  | 3.90E-01 | 8.72E-01 |
| <b>C2CD6</b>      | -1.17 | 3.75E-01 | 1.00E+00 | 0.76  | 3.90E-01 | 8.72E-01 |
| <b>ATPAF2</b>     | 0.02  | 9.44E-01 | 1.00E+00 | 0.15  | 3.90E-01 | 8.72E-01 |
| <b>ZFYVE28</b>    | -0.54 | 1.78E-01 | 1.00E+00 | 0.56  | 3.90E-01 | 8.72E-01 |
| <b>G113</b>       | 0.22  | 8.54E-01 | 1.00E+00 | -0.86 | 3.90E-01 | 8.72E-01 |
| <b>DNAJC16</b>    | 0.18  | 5.61E-01 | 1.00E+00 | 0.24  | 3.90E-01 | 8.72E-01 |
| <b>FCMR</b>       | -0.30 | 4.86E-01 | 1.00E+00 | 0.38  | 3.91E-01 | 8.72E-01 |
| <b>AC244153.1</b> | 0.59  | 2.06E-01 | 1.00E+00 | 0.38  | 3.91E-01 | 8.73E-01 |
| <b>LINC02352</b>  | 1.97  | 6.35E-02 | 1.00E+00 | -0.68 | 3.91E-01 | 8.73E-01 |
| <b>GP9</b>        | 1.62  | 3.65E-01 | 1.00E+00 | -1.36 | 3.91E-01 | 8.73E-01 |
| <b>ZSCAN25</b>    | -0.24 | 2.75E-01 | 1.00E+00 | -0.18 | 3.91E-01 | 8.73E-01 |
| <b>BRINP2</b>     | -0.25 | 8.56E-01 | 1.00E+00 | 1.04  | 3.91E-01 | 8.73E-01 |
| <b>TTC31</b>      | -0.04 | 8.18E-01 | 1.00E+00 | 0.11  | 3.91E-01 | 8.73E-01 |
| <b>MYL5</b>       | 0.36  | 1.94E-01 | 1.00E+00 | 0.26  | 3.91E-01 | 8.73E-01 |

|             |       |          |          |       |          |          |
|-------------|-------|----------|----------|-------|----------|----------|
| TRAK1       | 0.00  | 9.88E-01 | 1.00E+00 | 0.25  | 3.91E-01 | 8.73E-01 |
| ZNF449      | 0.29  | 6.90E-01 | 1.00E+00 | -0.50 | 3.91E-01 | 8.73E-01 |
| SMARCC2     | -0.23 | 2.17E-01 | 1.00E+00 | -0.17 | 3.91E-01 | 8.73E-01 |
| ZNF561-AS1  | -0.17 | 5.38E-01 | 1.00E+00 | -0.32 | 3.91E-01 | 8.73E-01 |
| KRT19       | -0.27 | 8.01E-01 | 1.00E+00 | -0.58 | 3.91E-01 | 8.73E-01 |
| AC104123.1  | -0.35 | 7.25E-01 | 1.00E+00 | -0.67 | 3.91E-01 | 8.73E-01 |
| SLC39A10    | -0.22 | 3.67E-01 | 1.00E+00 | -0.30 | 3.91E-01 | 8.73E-01 |
| ZNF839      | -0.25 | 3.48E-01 | 1.00E+00 | -0.55 | 3.91E-01 | 8.73E-01 |
| INKA1       | 0.06  | 8.28E-01 | 1.00E+00 | -0.33 | 3.91E-01 | 8.73E-01 |
| AC009237.15 | 0.57  | 6.00E-01 | 1.00E+00 | -1.46 | 3.91E-01 | 8.73E-01 |
| BATF2       | -0.59 | 4.68E-01 | 1.00E+00 | 0.85  | 3.91E-01 | 8.73E-01 |
| RYBP        | -0.02 | 9.11E-01 | 1.00E+00 | 0.31  | 3.91E-01 | 8.73E-01 |
| LBX2        | 0.50  | 6.91E-01 | 1.00E+00 | 0.90  | 3.91E-01 | 8.73E-01 |
| FABP3       | -0.41 | 5.02E-01 | 1.00E+00 | -0.57 | 3.91E-01 | 8.73E-01 |
| NPIP2       | -0.33 | 7.13E-01 | 1.00E+00 | 0.55  | 3.91E-01 | 8.73E-01 |
| LINC01301   | 0.17  | 8.55E-01 | 1.00E+00 | -0.61 | 3.91E-01 | 8.73E-01 |
| PRDM10      | -0.17 | 5.17E-01 | 1.00E+00 | -0.26 | 3.92E-01 | 8.73E-01 |
| SLC2A3      | -0.87 | 1.68E-01 | 1.00E+00 | 0.58  | 3.92E-01 | 8.73E-01 |
| VPS13A      | -0.23 | 3.75E-01 | 1.00E+00 | -0.23 | 3.92E-01 | 8.73E-01 |
| RASGEF1B    | -0.10 | 7.71E-01 | 1.00E+00 | 0.28  | 3.92E-01 | 8.73E-01 |
| XLOC_006263 | -0.29 | 7.23E-01 | 1.00E+00 | 0.37  | 3.92E-01 | 8.73E-01 |
| C2orf68     | -0.10 | 6.77E-01 | 1.00E+00 | 0.22  | 3.92E-01 | 8.73E-01 |
| FAM21FP     | -0.33 | 6.38E-01 | 1.00E+00 | 0.50  | 3.92E-01 | 8.73E-01 |
| CLDN3       | 0.44  | 5.31E-01 | 1.00E+00 | -0.71 | 3.92E-01 | 8.73E-01 |
| BCAR1       | -0.31 | 2.91E-01 | 1.00E+00 | 0.55  | 3.92E-01 | 8.73E-01 |
| WDR54       | -0.25 | 4.04E-01 | 1.00E+00 | 0.21  | 3.92E-01 | 8.73E-01 |
| IFI27L1     | -0.07 | 8.34E-01 | 1.00E+00 | 0.18  | 3.92E-01 | 8.73E-01 |
| HIPK1       | 0.06  | 7.87E-01 | 1.00E+00 | 0.25  | 3.92E-01 | 8.73E-01 |
| SDR42E1     | 0.05  | 8.79E-01 | 1.00E+00 | 0.34  | 3.92E-01 | 8.73E-01 |
| VCPKMT      | 0.08  | 8.40E-01 | 1.00E+00 | -0.30 | 3.92E-01 | 8.73E-01 |
| TRAV17      | -1.31 | 4.62E-01 | 1.00E+00 | 0.96  | 3.92E-01 | 8.73E-01 |
| XLOC_004419 | -1.28 | 1.10E-01 | 1.00E+00 | 0.80  | 3.93E-01 | 8.73E-01 |

|                     |       |          |          |       |          |          |
|---------------------|-------|----------|----------|-------|----------|----------|
| <b>GBP4</b>         | -0.59 | 3.16E-01 | 1.00E+00 | 0.58  | 3.93E-01 | 8.73E-01 |
| <b>AC005863.1</b>   | -0.25 | 9.41E-01 | 1.00E+00 | 1.36  | 3.93E-01 | 8.73E-01 |
| <b>ZNF347</b>       | 0.16  | 6.73E-01 | 1.00E+00 | -0.22 | 3.93E-01 | 8.73E-01 |
| <b>AC010300.1</b>   | 1.55  | 2.85E-01 | 1.00E+00 | -0.75 | 3.93E-01 | 8.73E-01 |
| <b>RP11-417J8.3</b> | 1.06  | 6.16E-01 | 1.00E+00 | -0.79 | 3.93E-01 | 8.73E-01 |
| <b>XLOC_009548</b>  | 4.23  | 1.99E-01 | 1.00E+00 | -2.71 | 3.93E-01 | 8.73E-01 |
| <b>GAN</b>          | 0.66  | 1.11E-01 | 1.00E+00 | -0.50 | 3.93E-01 | 8.73E-01 |
| <b>CD160</b>        | 0.52  | 6.46E-01 | 1.00E+00 | 0.87  | 3.93E-01 | 8.73E-01 |
| <b>MMP23B</b>       | -0.12 | 8.83E-01 | 1.00E+00 | 1.02  | 3.93E-01 | 8.73E-01 |
| <b>FUT1</b>         | -0.17 | 6.43E-01 | 1.00E+00 | 0.26  | 3.93E-01 | 8.73E-01 |
| <b>NPBWR1</b>       | 0.22  | 7.31E-01 | 1.00E+00 | -0.66 | 3.93E-01 | 8.73E-01 |
| <b>PHLPP2</b>       | 0.42  | 2.89E-01 | 1.00E+00 | 0.55  | 3.93E-01 | 8.73E-01 |
| <b>STPG2</b>        | -0.50 | 7.44E-01 | 1.00E+00 | -0.88 | 3.93E-01 | 8.73E-01 |
| <b>SULT1E1</b>      | -1.20 | 1.41E-01 | 1.00E+00 | -0.74 | 3.93E-01 | 8.73E-01 |
| <b>MYH7B</b>        | -0.43 | 5.11E-01 | 1.00E+00 | 0.85  | 3.93E-01 | 8.73E-01 |
| <b>RREB1</b>        | -0.49 | 1.25E-01 | 1.00E+00 | 0.35  | 3.93E-01 | 8.73E-01 |
| <b>GPR82</b>        | -0.73 | 4.92E-01 | 1.00E+00 | 0.53  | 3.93E-01 | 8.73E-01 |
| <b>PFKFB1</b>       | 3.34  | 8.10E-04 | 1.42E-01 | -0.87 | 3.93E-01 | 8.73E-01 |
| <b>PHLDB1</b>       | 0.44  | 3.51E-01 | 1.00E+00 | 0.50  | 3.93E-01 | 8.73E-01 |
| <b>PLEKHA5</b>      | 0.03  | 9.13E-01 | 1.00E+00 | -0.23 | 3.93E-01 | 8.73E-01 |
| <b>TRIM13</b>       | 0.24  | 2.13E-01 | 1.00E+00 | -0.19 | 3.93E-01 | 8.73E-01 |
| <b>FAM43A</b>       | -0.48 | 2.34E-01 | 1.00E+00 | 0.59  | 3.93E-01 | 8.73E-01 |
| <b>SP2</b>          | -0.28 | 3.84E-01 | 1.00E+00 | 0.30  | 3.93E-01 | 8.73E-01 |
| <b>HSPB8</b>        | 0.10  | 7.25E-01 | 1.00E+00 | 0.22  | 3.93E-01 | 8.73E-01 |
| <b>PEX5</b>         | 0.12  | 4.21E-01 | 1.00E+00 | 0.19  | 3.93E-01 | 8.73E-01 |
| <b>CD1A</b>         | -0.67 | 2.04E-01 | 1.00E+00 | -0.70 | 3.93E-01 | 8.73E-01 |
| <b>HIVEP1</b>       | -0.46 | 6.02E-02 | 1.00E+00 | 0.34  | 3.93E-01 | 8.73E-01 |
| <b>LINC02166</b>    | 2.29  | 2.16E-01 | 1.00E+00 | -0.90 | 3.93E-01 | 8.73E-01 |
| <b>HM13-IT1</b>     | 0.77  | 5.98E-01 | 1.00E+00 | 1.09  | 3.93E-01 | 8.73E-01 |
| <b>SENP5</b>        | 0.13  | 4.64E-01 | 1.00E+00 | 0.21  | 3.93E-01 | 8.73E-01 |
| <b>AL031772.1</b>   | -2.62 | 1.20E-01 | 1.00E+00 | 0.73  | 3.93E-01 | 8.73E-01 |
| <b>NASP</b>         | -0.05 | 8.14E-01 | 1.00E+00 | 0.27  | 3.93E-01 | 8.73E-01 |

|                   |       |          |          |       |          |          |
|-------------------|-------|----------|----------|-------|----------|----------|
| <b>HIST1H2BH</b>  | -0.62 | 3.79E-01 | 1.00E+00 | 0.77  | 3.94E-01 | 8.73E-01 |
| <b>GOLGA3</b>     | -0.27 | 2.92E-01 | 1.00E+00 | 0.29  | 3.94E-01 | 8.73E-01 |
| <b>CSPG5</b>      | -0.47 | 3.38E-01 | 1.00E+00 | -0.69 | 3.94E-01 | 8.73E-01 |
| <b>AC007622.2</b> | 1.52  | 6.56E-01 | 1.00E+00 | -0.92 | 3.94E-01 | 8.73E-01 |
| <b>SLURP2</b>     | 1.29  | 3.99E-01 | 1.00E+00 | 0.79  | 3.94E-01 | 8.73E-01 |
| <b>EGLN3</b>      | -0.10 | 8.00E-01 | 1.00E+00 | -0.38 | 3.94E-01 | 8.73E-01 |
| <b>NEURL2</b>     | -1.96 | 3.21E-01 | 1.00E+00 | -0.61 | 3.94E-01 | 8.73E-01 |
| <b>H2AFX</b>      | -0.32 | 3.39E-01 | 1.00E+00 | 0.50  | 3.94E-01 | 8.73E-01 |
| <b>ZNF860</b>     | -0.01 | 9.77E-01 | 1.00E+00 | 0.48  | 3.94E-01 | 8.73E-01 |
| <b>RCBTB1</b>     | 0.23  | 4.09E-01 | 1.00E+00 | -0.32 | 3.94E-01 | 8.73E-01 |
| <b>CT62</b>       | -1.04 | 5.62E-01 | 1.00E+00 | -1.32 | 3.94E-01 | 8.73E-01 |
| <b>OSBPL6</b>     | 0.08  | 8.54E-01 | 1.00E+00 | -0.39 | 3.94E-01 | 8.73E-01 |
| <b>ZNF28</b>      | 0.23  | 4.86E-01 | 1.00E+00 | -0.25 | 3.94E-01 | 8.73E-01 |
| <b>AL359513.1</b> | -0.84 | 1.54E-01 | 1.00E+00 | -0.62 | 3.94E-01 | 8.73E-01 |
| <b>AC009065.4</b> | 0.34  | 6.82E-01 | 1.00E+00 | -0.47 | 3.94E-01 | 8.73E-01 |
| <b>TCF19</b>      | -0.34 | 6.29E-02 | 1.00E+00 | 0.26  | 3.94E-01 | 8.73E-01 |
| <b>FAM135B</b>    | -1.46 | 1.06E-01 | 1.00E+00 | -1.00 | 3.94E-01 | 8.73E-01 |
| <b>HOMER3</b>     | -0.49 | 2.16E-01 | 1.00E+00 | 0.30  | 3.94E-01 | 8.73E-01 |
| <b>SPATA1</b>     | -1.21 | 3.12E-01 | 1.00E+00 | -0.47 | 3.94E-01 | 8.73E-01 |
| <b>SPRR2F</b>     | -3.24 | 3.03E-01 | 1.00E+00 | 2.68  | 3.94E-01 | 8.73E-01 |
| <b>TSEN15</b>     | -0.22 | 3.17E-01 | 1.00E+00 | -0.21 | 3.94E-01 | 8.73E-01 |
| <b>DNAJC9</b>     | -0.29 | 2.35E-01 | 1.00E+00 | 0.23  | 3.94E-01 | 8.73E-01 |
| <b>ZKSCAN8</b>    | 0.04  | 8.72E-01 | 1.00E+00 | 0.35  | 3.94E-01 | 8.73E-01 |
| <b>DCUN1D2</b>    | 0.14  | 5.02E-01 | 1.00E+00 | -0.26 | 3.94E-01 | 8.73E-01 |
| <b>PIPSL</b>      | -1.16 | 4.23E-01 | 1.00E+00 | -0.53 | 3.94E-01 | 8.73E-01 |
| <b>PRR19</b>      | -1.18 | 1.53E-01 | 1.00E+00 | 0.39  | 3.94E-01 | 8.73E-01 |
| <b>LDAH</b>       | 0.00  | 9.97E-01 | 1.00E+00 | -0.17 | 3.95E-01 | 8.74E-01 |
| <b>C1D</b>        | 0.03  | 9.04E-01 | 1.00E+00 | -0.29 | 3.95E-01 | 8.74E-01 |
| <b>C18orf65</b>   | 0.15  | 8.84E-01 | 1.00E+00 | 0.84  | 3.95E-01 | 8.74E-01 |
| <b>PYY2</b>       | -3.04 | 3.67E-01 | 1.00E+00 | -0.98 | 3.95E-01 | 8.74E-01 |
| <b>GUCY1A1</b>    | -0.39 | 4.43E-01 | 1.00E+00 | 0.33  | 3.95E-01 | 8.74E-01 |
| <b>CLCNKA</b>     | 2.22  | 1.24E-01 | 1.00E+00 | 0.94  | 3.95E-01 | 8.74E-01 |

|                      |       |          |          |       |          |          |
|----------------------|-------|----------|----------|-------|----------|----------|
| <b>RYR3</b>          | -0.77 | 9.95E-02 | 1.00E+00 | 0.51  | 3.95E-01 | 8.74E-01 |
| <b>SMPD3</b>         | -0.14 | 8.45E-01 | 1.00E+00 | 0.58  | 3.95E-01 | 8.74E-01 |
| <b>AC020637.1</b>    | -1.27 | 7.14E-01 | 1.00E+00 | -1.70 | 3.95E-01 | 8.74E-01 |
| <b>SLC47A2</b>       | -0.31 | 7.10E-01 | 1.00E+00 | 0.66  | 3.95E-01 | 8.74E-01 |
| <b>TNFRSF10A-AS1</b> | -1.56 | 1.27E-01 | 1.00E+00 | -0.49 | 3.95E-01 | 8.74E-01 |
| <b>SH3GL1P1</b>      | -0.41 | 6.53E-01 | 1.00E+00 | 0.80  | 3.95E-01 | 8.74E-01 |
| <b>TMC4</b>          | 0.05  | 9.37E-01 | 1.00E+00 | -0.59 | 3.95E-01 | 8.74E-01 |
| <b>AC010536.1</b>    | 0.09  | 9.61E-01 | 1.00E+00 | 1.09  | 3.95E-01 | 8.74E-01 |
| <b>SLC22A20P</b>     | -0.78 | 3.62E-01 | 1.00E+00 | 1.09  | 3.95E-01 | 8.74E-01 |
| <b>UTP3</b>          | -0.17 | 3.55E-01 | 1.00E+00 | 0.21  | 3.95E-01 | 8.74E-01 |
| <b>CCDC60</b>        | -1.85 | 1.80E-01 | 1.00E+00 | 0.95  | 3.95E-01 | 8.74E-01 |
| <b>KRCC1</b>         | 0.37  | 1.99E-01 | 1.00E+00 | -0.29 | 3.95E-01 | 8.74E-01 |
| <b>TRMT10B</b>       | -0.08 | 7.68E-01 | 1.00E+00 | -0.15 | 3.95E-01 | 8.74E-01 |
| <b>DNAJC13</b>       | 0.18  | 4.49E-01 | 1.00E+00 | 0.33  | 3.95E-01 | 8.74E-01 |
| <b>AL356740.1</b>    | 1.05  | 3.79E-01 | 1.00E+00 | -1.15 | 3.95E-01 | 8.74E-01 |
| <b>MRPS36P1</b>      | NA    | NA       | NA       | -0.62 | 3.95E-01 | 8.74E-01 |
| <b>METTL9</b>        | -0.03 | 8.88E-01 | 1.00E+00 | -0.35 | 3.95E-01 | 8.74E-01 |
| <b>NDUFAF2</b>       | -0.29 | 1.86E-01 | 1.00E+00 | -0.17 | 3.95E-01 | 8.74E-01 |
| <b>CLPB</b>          | -0.58 | 7.05E-03 | 5.12E-01 | 0.22  | 3.95E-01 | 8.74E-01 |
| <b>C6orf223</b>      | 0.62  | 6.71E-01 | 1.00E+00 | 1.32  | 3.96E-01 | 8.74E-01 |
| <b>AL445189.2</b>    | 0.79  | 8.21E-01 | 1.00E+00 | 0.84  | 3.96E-01 | 8.74E-01 |
| <b>AC004231.1</b>    | -0.27 | 6.08E-01 | 1.00E+00 | -0.58 | 3.96E-01 | 8.74E-01 |
| <b>XLOC_013960</b>   | -0.19 | 7.71E-01 | 1.00E+00 | 0.94  | 3.96E-01 | 8.74E-01 |
| <b>AC107375.1</b>    | -0.18 | 6.59E-01 | 1.00E+00 | 0.60  | 3.96E-01 | 8.74E-01 |
| <b>AL162414.1</b>    | -1.60 | 6.44E-01 | 1.00E+00 | 1.49  | 3.96E-01 | 8.74E-01 |
| <b>MYO5A</b>         | -0.26 | 1.39E-01 | 1.00E+00 | 0.29  | 3.96E-01 | 8.74E-01 |
| <b>G34929</b>        | -0.12 | 8.94E-01 | 1.00E+00 | 0.94  | 3.96E-01 | 8.74E-01 |
| <b>HIPK1-AS1</b>     | -0.27 | 8.33E-01 | 1.00E+00 | 0.95  | 3.96E-01 | 8.74E-01 |
| <b>LINC00900</b>     | 0.66  | 2.10E-01 | 1.00E+00 | -0.46 | 3.96E-01 | 8.74E-01 |
| <b>MAU2</b>          | -0.08 | 7.31E-01 | 1.00E+00 | 0.33  | 3.96E-01 | 8.74E-01 |
| <b>AFG3L1P</b>       | -0.38 | 3.65E-01 | 1.00E+00 | 0.36  | 3.96E-01 | 8.74E-01 |
| <b>TPT1-AS1</b>      | 0.26  | 4.47E-01 | 1.00E+00 | 0.26  | 3.96E-01 | 8.74E-01 |



|             |       |          |          |       |          |          |
|-------------|-------|----------|----------|-------|----------|----------|
| EIF3F       | -0.06 | 8.19E-01 | 1.00E+00 | 0.18  | 3.96E-01 | 8.74E-01 |
| PGM3        | -0.07 | 6.95E-01 | 1.00E+00 | -0.25 | 3.96E-01 | 8.74E-01 |
| SECTM1      | -0.43 | 1.64E-01 | 1.00E+00 | 0.86  | 3.96E-01 | 8.74E-01 |
| MELTF       | 0.02  | 9.83E-01 | 1.00E+00 | -0.61 | 3.96E-01 | 8.74E-01 |
| DARS-AS1    | -0.20 | 8.25E-01 | 1.00E+00 | -0.30 | 3.96E-01 | 8.74E-01 |
| MOB1B       | -0.13 | 6.22E-01 | 1.00E+00 | -0.28 | 3.96E-01 | 8.74E-01 |
| XLOC_001781 | 0.56  | 8.71E-01 | 1.00E+00 | 1.25  | 3.96E-01 | 8.74E-01 |
| LINC02031   | -0.90 | 4.82E-01 | 1.00E+00 | -0.90 | 3.96E-01 | 8.74E-01 |
| MMP27       | 0.68  | 1.68E-01 | 1.00E+00 | 0.50  | 3.96E-01 | 8.74E-01 |
| HSD17B2     | -0.20 | 8.43E-01 | 1.00E+00 | 0.64  | 3.96E-01 | 8.74E-01 |
| ARC         | -2.83 | 2.24E-02 | 9.00E-01 | -0.86 | 3.96E-01 | 8.74E-01 |
| ATAD3B      | -0.47 | 3.20E-01 | 1.00E+00 | 0.53  | 3.96E-01 | 8.74E-01 |
| ADRB3       | 5.22  | 2.81E-02 | 9.75E-01 | 1.36  | 3.96E-01 | 8.74E-01 |
| RPL21P75    | 0.28  | 7.23E-01 | 1.00E+00 | -0.58 | 3.96E-01 | 8.74E-01 |
| DNAJB6      | 0.09  | 7.65E-01 | 1.00E+00 | -0.19 | 3.96E-01 | 8.74E-01 |
| GSTT2B      | 0.64  | 5.01E-01 | 1.00E+00 | 0.63  | 3.96E-01 | 8.74E-01 |
| DCAF6       | 0.05  | 7.94E-01 | 1.00E+00 | -0.19 | 3.97E-01 | 8.74E-01 |
| ALG2        | -0.06 | 7.02E-01 | 1.00E+00 | 0.13  | 3.97E-01 | 8.74E-01 |
| G30323      | -1.21 | 1.24E-01 | 1.00E+00 | 0.76  | 3.97E-01 | 8.74E-01 |
| THADA       | 0.01  | 9.61E-01 | 1.00E+00 | -0.20 | 3.97E-01 | 8.74E-01 |
| MSX1        | 0.19  | 7.08E-01 | 1.00E+00 | 0.63  | 3.97E-01 | 8.74E-01 |
| ERBIN       | 0.11  | 6.77E-01 | 1.00E+00 | -0.20 | 3.97E-01 | 8.74E-01 |
| ZNF761      | 0.05  | 8.88E-01 | 1.00E+00 | -0.28 | 3.97E-01 | 8.74E-01 |
| AC072062.1  | 0.23  | 8.28E-01 | 1.00E+00 | 0.63  | 3.97E-01 | 8.74E-01 |
| APAF1       | 0.44  | 3.68E-01 | 1.00E+00 | 0.52  | 3.97E-01 | 8.74E-01 |
| ARF4        | -0.01 | 9.56E-01 | 1.00E+00 | -0.24 | 3.97E-01 | 8.75E-01 |
| INHBA-AS1   | -1.74 | 4.21E-01 | 1.00E+00 | -1.07 | 3.97E-01 | 8.75E-01 |
| TRIM2       | 0.05  | 9.08E-01 | 1.00E+00 | -0.34 | 3.97E-01 | 8.75E-01 |
| DDX49       | -0.21 | 4.50E-01 | 1.00E+00 | 0.20  | 3.97E-01 | 8.75E-01 |
| SLIT3       | 0.40  | 3.57E-01 | 1.00E+00 | 0.53  | 3.98E-01 | 8.75E-01 |
| SLC39A4     | -0.60 | 1.46E-01 | 1.00E+00 | -0.34 | 3.98E-01 | 8.75E-01 |
| TPGS2       | 0.05  | 8.12E-01 | 1.00E+00 | -0.19 | 3.98E-01 | 8.75E-01 |

|                     |       |          |          |       |          |          |
|---------------------|-------|----------|----------|-------|----------|----------|
| <b>CWH43</b>        | -0.21 | 6.28E-01 | 1.00E+00 | -0.63 | 3.98E-01 | 8.75E-01 |
| <b>NRN1</b>         | 0.25  | 4.88E-01 | 1.00E+00 | -0.37 | 3.98E-01 | 8.75E-01 |
| <b>AJ003147.3</b>   | 2.01  | 3.92E-01 | 1.00E+00 | 1.27  | 3.98E-01 | 8.75E-01 |
| <b>AC011389.1</b>   | -1.30 | 6.21E-01 | 1.00E+00 | 0.92  | 3.98E-01 | 8.75E-01 |
| <b>WDYHV1</b>       | 0.02  | 9.17E-01 | 1.00E+00 | 0.20  | 3.98E-01 | 8.75E-01 |
| <b>ISM1</b>         | 0.19  | 7.05E-01 | 1.00E+00 | 0.50  | 3.98E-01 | 8.75E-01 |
| <b>ZNF627</b>       | 0.22  | 3.56E-01 | 1.00E+00 | 0.21  | 3.98E-01 | 8.76E-01 |
| <b>RP11-31207.2</b> | -0.54 | 2.11E-01 | 1.00E+00 | 0.53  | 3.98E-01 | 8.76E-01 |
| <b>AMHR2</b>        | 1.75  | 1.81E-01 | 1.00E+00 | -0.99 | 3.98E-01 | 8.76E-01 |
| <b>DCTN5</b>        | -0.07 | 6.85E-01 | 1.00E+00 | 0.14  | 3.98E-01 | 8.76E-01 |
| <b>G39812</b>       | 0.66  | 4.17E-01 | 1.00E+00 | 0.66  | 3.98E-01 | 8.76E-01 |
| <b>DEPDC4</b>       | 0.13  | 8.79E-01 | 1.00E+00 | -0.61 | 3.98E-01 | 8.76E-01 |
| <b>LRRC3</b>        | 0.09  | 7.49E-01 | 1.00E+00 | 0.74  | 3.98E-01 | 8.76E-01 |
| <b>AC084125.2</b>   | 0.95  | 5.85E-01 | 1.00E+00 | 0.93  | 3.99E-01 | 8.76E-01 |
| <b>FAM111B</b>      | -0.11 | 7.24E-01 | 1.00E+00 | 0.52  | 3.99E-01 | 8.76E-01 |
| <b>HLA-U</b>        | -2.59 | 2.02E-01 | 1.00E+00 | -1.38 | 3.99E-01 | 8.76E-01 |
| <b>SEC24D</b>       | -0.12 | 6.29E-01 | 1.00E+00 | 0.41  | 3.99E-01 | 8.76E-01 |
| <b>TBC1D22B</b>     | 0.15  | 6.07E-01 | 1.00E+00 | 0.27  | 3.99E-01 | 8.76E-01 |
| <b>AL353743.1</b>   | -0.02 | 9.69E-01 | 1.00E+00 | -0.61 | 3.99E-01 | 8.76E-01 |
| <b>HOXC13</b>       | -0.19 | 5.69E-01 | 1.00E+00 | -0.53 | 3.99E-01 | 8.76E-01 |
| <b>HIST1H3C</b>     | -1.05 | 6.58E-01 | 1.00E+00 | -1.15 | 3.99E-01 | 8.76E-01 |
| <b>ACBD7</b>        | -0.13 | 9.27E-01 | 1.00E+00 | 0.94  | 3.99E-01 | 8.76E-01 |
| <b>PGAM5</b>        | -0.32 | 1.36E-01 | 1.00E+00 | -0.42 | 3.99E-01 | 8.76E-01 |
| <b>ZAP70</b>        | 0.18  | 7.42E-01 | 1.00E+00 | 2.09  | 3.99E-01 | 8.76E-01 |
| <b>GFPT1</b>        | 0.30  | 4.74E-01 | 1.00E+00 | -0.34 | 3.99E-01 | 8.76E-01 |
| <b>AC090589.1</b>   | -0.25 | 9.41E-01 | 1.00E+00 | 0.54  | 3.99E-01 | 8.76E-01 |
| <b>PMM2</b>         | -0.29 | 3.39E-01 | 1.00E+00 | 0.20  | 3.99E-01 | 8.76E-01 |
| <b>ATG7</b>         | -0.02 | 9.34E-01 | 1.00E+00 | 0.12  | 3.99E-01 | 8.76E-01 |
| <b>RASSF8</b>       | 0.04  | 9.20E-01 | 1.00E+00 | 0.43  | 3.99E-01 | 8.76E-01 |
| <b>AL513477.2</b>   | -0.92 | 7.64E-01 | 1.00E+00 | -0.67 | 3.99E-01 | 8.76E-01 |
| <b>KCNJ11</b>       | 0.49  | 2.55E-01 | 1.00E+00 | -0.76 | 3.99E-01 | 8.76E-01 |
| <b>ZNF708</b>       | 0.26  | 5.99E-01 | 1.00E+00 | -0.30 | 3.99E-01 | 8.76E-01 |

|                    |       |          |          |       |          |          |
|--------------------|-------|----------|----------|-------|----------|----------|
| <b>TTC30A</b>      | 0.18  | 5.98E-01 | 1.00E+00 | -0.36 | 3.99E-01 | 8.76E-01 |
| <b>ZRANB3</b>      | -0.79 | 6.88E-03 | 5.06E-01 | -0.35 | 3.99E-01 | 8.76E-01 |
| <b>HGC6.3</b>      | -1.86 | 4.68E-01 | 1.00E+00 | 1.62  | 3.99E-01 | 8.76E-01 |
| <b>REV1</b>        | -0.23 | 3.94E-01 | 1.00E+00 | -0.30 | 3.99E-01 | 8.76E-01 |
| <b>CRK</b>         | 0.29  | 1.41E-01 | 1.00E+00 | -0.26 | 3.99E-01 | 8.76E-01 |
| <b>C7</b>          | 0.60  | 4.08E-01 | 1.00E+00 | 0.59  | 3.99E-01 | 8.76E-01 |
| <b>AC097460.1</b>  | 0.55  | 6.77E-01 | 1.00E+00 | -0.97 | 4.00E-01 | 8.76E-01 |
| <b>DNAJC17</b>     | 0.35  | 1.59E-01 | 1.00E+00 | 0.17  | 4.00E-01 | 8.76E-01 |
| <b>TBX19</b>       | 0.00  | 9.96E-01 | 1.00E+00 | 0.39  | 4.00E-01 | 8.76E-01 |
| <b>NEDD8</b>       | 0.17  | 4.56E-01 | 1.00E+00 | -0.45 | 4.00E-01 | 8.76E-01 |
| <b>XLOC_001726</b> | -1.96 | 3.48E-02 | 1.00E+00 | 0.76  | 4.00E-01 | 8.76E-01 |
| <b>PIK3CD-AS1</b>  | 1.10  | 7.48E-01 | 1.00E+00 | 1.16  | 4.00E-01 | 8.76E-01 |
| <b>TANGO2</b>      | 0.00  | 9.95E-01 | 1.00E+00 | 0.22  | 4.00E-01 | 8.76E-01 |
| <b>CYP51A1</b>     | -0.16 | 6.25E-01 | 1.00E+00 | 0.38  | 4.00E-01 | 8.76E-01 |
| <b>RUNDC3B</b>     | -0.69 | 3.74E-02 | 1.00E+00 | -0.32 | 4.00E-01 | 8.76E-01 |
| <b>CALML3</b>      | -0.77 | 8.24E-02 | 1.00E+00 | 0.61  | 4.00E-01 | 8.76E-01 |
| <b>AC009404.1</b>  | -0.05 | 9.21E-01 | 1.00E+00 | 0.65  | 4.00E-01 | 8.76E-01 |
| <b>ZNF564</b>      | 0.95  | 6.42E-01 | 1.00E+00 | 0.58  | 4.00E-01 | 8.76E-01 |
| <b>RNF141</b>      | 0.18  | 4.90E-01 | 1.00E+00 | -0.28 | 4.00E-01 | 8.76E-01 |
| <b>XLOC_010336</b> | 0.26  | 5.83E-01 | 1.00E+00 | 0.60  | 4.00E-01 | 8.76E-01 |
| <b>C19orf53</b>    | -0.03 | 8.74E-01 | 1.00E+00 | 0.17  | 4.00E-01 | 8.76E-01 |
| <b>GUSBP1</b>      | 0.38  | 3.28E-01 | 1.00E+00 | -0.35 | 4.00E-01 | 8.76E-01 |
| <b>IQCJ-SCHIP1</b> | 0.08  | 8.79E-01 | 1.00E+00 | 0.84  | 4.00E-01 | 8.76E-01 |
| <b>AL590787.1</b>  | -1.67 | 3.90E-01 | 1.00E+00 | 1.56  | 4.00E-01 | 8.76E-01 |
| <b>CCPG1</b>       | 0.49  | 2.87E-01 | 1.00E+00 | -0.24 | 4.00E-01 | 8.76E-01 |
| <b>PLK3</b>        | -0.42 | 4.47E-01 | 1.00E+00 | 0.33  | 4.00E-01 | 8.76E-01 |
| <b>NMT1</b>        | 0.21  | 2.62E-01 | 1.00E+00 | 0.35  | 4.00E-01 | 8.76E-01 |
| <b>B3GNT5</b>      | -0.47 | 4.27E-01 | 1.00E+00 | 0.25  | 4.00E-01 | 8.76E-01 |
| <b>BACH1-IT1</b>   | -0.70 | 5.77E-01 | 1.00E+00 | 0.76  | 4.01E-01 | 8.76E-01 |
| <b>CACNB4</b>      | -0.18 | 7.99E-01 | 1.00E+00 | 0.40  | 4.01E-01 | 8.76E-01 |
| <b>ZNF382</b>      | 0.79  | 3.50E-01 | 1.00E+00 | 0.49  | 4.01E-01 | 8.76E-01 |
| <b>G1047</b>       | -1.25 | 4.67E-02 | 1.00E+00 | 0.78  | 4.01E-01 | 8.76E-01 |

|                   |       |          |          |       |          |          |
|-------------------|-------|----------|----------|-------|----------|----------|
| <b>AC092807.3</b> | -1.20 | 1.55E-01 | 1.00E+00 | -0.48 | 4.01E-01 | 8.76E-01 |
| <b>MST1</b>       | -0.94 | 2.96E-02 | 9.96E-01 | 0.59  | 4.01E-01 | 8.76E-01 |
| <b>CCDC106</b>    | 0.11  | 7.54E-01 | 1.00E+00 | 0.36  | 4.01E-01 | 8.76E-01 |
| <b>FTH1</b>       | 0.24  | 5.49E-01 | 1.00E+00 | 0.48  | 4.01E-01 | 8.76E-01 |
| <b>RAP1GAP2</b>   | 0.00  | 9.96E-01 | 1.00E+00 | 0.49  | 4.01E-01 | 8.76E-01 |
| <b>ATG3</b>       | 0.06  | 7.78E-01 | 1.00E+00 | -0.20 | 4.01E-01 | 8.76E-01 |
| <b>AL359711.2</b> | 0.12  | 8.29E-01 | 1.00E+00 | -0.50 | 4.01E-01 | 8.76E-01 |
| <b>NAALAD2</b>    | 0.84  | 2.06E-01 | 1.00E+00 | -0.68 | 4.01E-01 | 8.76E-01 |
| <b>SRP14-AS1</b>  | -0.83 | 1.48E-01 | 1.00E+00 | -0.48 | 4.01E-01 | 8.76E-01 |
| <b>GSTA3</b>      | 0.40  | 3.89E-01 | 1.00E+00 | -0.68 | 4.01E-01 | 8.76E-01 |
| <b>ICA1</b>       | 0.06  | 8.81E-01 | 1.00E+00 | -0.24 | 4.01E-01 | 8.76E-01 |
| <b>TOE1</b>       | 0.07  | 8.23E-01 | 1.00E+00 | 0.22  | 4.01E-01 | 8.76E-01 |
| <b>MPND</b>       | -0.34 | 2.34E-01 | 1.00E+00 | -0.44 | 4.01E-01 | 8.76E-01 |
| <b>WDR27</b>      | -0.26 | 5.44E-01 | 1.00E+00 | 0.27  | 4.01E-01 | 8.76E-01 |
| <b>AL022341.1</b> | 1.39  | 4.66E-01 | 1.00E+00 | -0.86 | 4.01E-01 | 8.76E-01 |
| <b>LRRC7</b>      | -0.06 | 9.20E-01 | 1.00E+00 | -0.62 | 4.01E-01 | 8.77E-01 |
| <b>HADHA</b>      | -0.04 | 8.61E-01 | 1.00E+00 | -0.11 | 4.01E-01 | 8.77E-01 |
| <b>TRMT9B</b>     | 0.23  | 4.76E-01 | 1.00E+00 | -0.35 | 4.01E-01 | 8.77E-01 |
| <b>FYCO1</b>      | -0.16 | 5.42E-01 | 1.00E+00 | 0.31  | 4.01E-01 | 8.77E-01 |
| <b>MAGEE1</b>     | -0.39 | 1.53E-01 | 1.00E+00 | 0.36  | 4.01E-01 | 8.77E-01 |
| <b>AC099494.2</b> | 0.16  | 8.35E-01 | 1.00E+00 | -0.81 | 4.01E-01 | 8.77E-01 |
| <b>ALCAM</b>      | -0.31 | 3.29E-02 | 1.00E+00 | -0.22 | 4.01E-01 | 8.77E-01 |
| <b>FAM3D</b>      | -0.49 | 4.11E-01 | 1.00E+00 | -0.64 | 4.01E-01 | 8.77E-01 |
| <b>HHEX</b>       | 0.14  | 8.02E-01 | 1.00E+00 | 0.35  | 4.02E-01 | 8.77E-01 |
| <b>RRS1</b>       | -0.43 | 9.47E-02 | 1.00E+00 | 0.32  | 4.02E-01 | 8.77E-01 |
| <b>AP002761.3</b> | 0.72  | 3.52E-01 | 1.00E+00 | 0.95  | 4.02E-01 | 8.77E-01 |
| <b>PTPRN2</b>     | -0.25 | 6.87E-01 | 1.00E+00 | 0.41  | 4.02E-01 | 8.77E-01 |
| <b>OR7E62P</b>    | 0.59  | 2.68E-01 | 1.00E+00 | -0.55 | 4.02E-01 | 8.77E-01 |
| <b>TRMT2A</b>     | -0.03 | 9.11E-01 | 1.00E+00 | 0.28  | 4.02E-01 | 8.77E-01 |
| <b>TTF2</b>       | -0.11 | 7.06E-01 | 1.00E+00 | 0.24  | 4.02E-01 | 8.77E-01 |
| <b>ADGRG4</b>     | -1.87 | 3.71E-01 | 1.00E+00 | 1.65  | 4.02E-01 | 8.77E-01 |
| <b>AC132872.1</b> | -0.31 | 5.06E-01 | 1.00E+00 | 0.54  | 4.02E-01 | 8.77E-01 |

|                    |       |          |          |       |          |          |
|--------------------|-------|----------|----------|-------|----------|----------|
| <b>HMG2P46</b>     | -0.18 | 7.68E-01 | 1.00E+00 | -0.46 | 4.02E-01 | 8.77E-01 |
| <b>HSD3BP4</b>     | -1.28 | 5.05E-01 | 1.00E+00 | -0.84 | 4.02E-01 | 8.77E-01 |
| <b>RNA5-8SP6</b>   | -0.39 | 4.19E-01 | 1.00E+00 | -0.57 | 4.02E-01 | 8.77E-01 |
| <b>SPX</b>         | 4.69  | 1.34E-02 | 7.26E-01 | -2.63 | 4.02E-01 | 8.77E-01 |
| <b>TM9SF4</b>      | -0.05 | 8.21E-01 | 1.00E+00 | 0.21  | 4.02E-01 | 8.77E-01 |
| <b>RAB3B</b>       | 0.11  | 7.29E-01 | 1.00E+00 | -0.45 | 4.02E-01 | 8.77E-01 |
| <b>AL139099.3</b>  | -1.37 | 6.93E-01 | 1.00E+00 | -0.73 | 4.02E-01 | 8.77E-01 |
| <b>RNPEP</b>       | -0.38 | 2.33E-01 | 1.00E+00 | -0.32 | 4.02E-01 | 8.77E-01 |
| <b>TPRXL</b>       | -0.64 | 2.66E-02 | 9.50E-01 | 0.47  | 4.02E-01 | 8.77E-01 |
| <b>POM121C</b>     | -0.26 | 1.42E-01 | 1.00E+00 | 0.48  | 4.02E-01 | 8.77E-01 |
| <b>TRIM67</b>      | 1.09  | 3.28E-01 | 1.00E+00 | 1.09  | 4.02E-01 | 8.77E-01 |
| <b>PHKA2-AS1</b>   | -0.29 | 8.05E-01 | 1.00E+00 | 0.85  | 4.02E-01 | 8.77E-01 |
| <b>SLC2A10</b>     | 0.41  | 4.30E-01 | 1.00E+00 | 0.34  | 4.02E-01 | 8.77E-01 |
| <b>SH3GLB2</b>     | 0.02  | 9.53E-01 | 1.00E+00 | -0.40 | 4.02E-01 | 8.77E-01 |
| <b>PCDHGC4</b>     | -1.18 | 8.35E-02 | 1.00E+00 | 1.12  | 4.02E-01 | 8.77E-01 |
| <b>TMEM213</b>     | 1.19  | 1.57E-01 | 1.00E+00 | -0.71 | 4.02E-01 | 8.77E-01 |
| <b>MOB1A</b>       | 0.04  | 8.99E-01 | 1.00E+00 | -0.18 | 4.02E-01 | 8.77E-01 |
| <b>XLOC_012763</b> | -0.07 | 8.92E-01 | 1.00E+00 | -0.76 | 4.03E-01 | 8.77E-01 |
| <b>SFSWAP</b>      | -0.21 | 3.85E-01 | 1.00E+00 | 0.30  | 4.03E-01 | 8.77E-01 |
| <b>PSMD13</b>      | 0.03  | 8.47E-01 | 1.00E+00 | 0.11  | 4.03E-01 | 8.77E-01 |
| <b>SLC7A5P1</b>    | -2.79 | 3.04E-01 | 1.00E+00 | 1.16  | 4.03E-01 | 8.77E-01 |
| <b>LARGE1</b>      | -0.17 | 5.49E-01 | 1.00E+00 | 0.40  | 4.03E-01 | 8.77E-01 |
| <b>ASIC3</b>       | -0.93 | 4.03E-01 | 1.00E+00 | 1.05  | 4.03E-01 | 8.77E-01 |
| <b>CNTD1</b>       | 1.10  | 2.52E-01 | 1.00E+00 | -0.55 | 4.03E-01 | 8.77E-01 |
| <b>C9orf106</b>    | 1.82  | 2.40E-01 | 1.00E+00 | 1.05  | 4.03E-01 | 8.77E-01 |
| <b>SMARCE1P2</b>   | 0.51  | 6.51E-01 | 1.00E+00 | 0.96  | 4.03E-01 | 8.77E-01 |
| <b>MINOS1P2</b>    | NA    | NA       | NA       | 0.58  | 4.03E-01 | 8.77E-01 |
| <b>CATSPERD</b>    | -0.90 | 7.82E-01 | 1.00E+00 | 1.02  | 4.03E-01 | 8.77E-01 |
| <b>DRG2</b>        | -0.22 | 3.04E-01 | 1.00E+00 | -0.12 | 4.03E-01 | 8.77E-01 |
| <b>NAAA</b>        | 0.19  | 4.56E-01 | 1.00E+00 | -0.15 | 4.03E-01 | 8.77E-01 |
| <b>RPL36AP21</b>   | NA    | NA       | NA       | -0.66 | 4.03E-01 | 8.77E-01 |
| <b>NIFK</b>        | 0.25  | 2.79E-01 | 1.00E+00 | -0.28 | 4.03E-01 | 8.77E-01 |

|             |       |          |          |       |          |          |
|-------------|-------|----------|----------|-------|----------|----------|
| ST8SIA1     | -0.10 | 6.72E-01 | 1.00E+00 | 0.34  | 4.03E-01 | 8.77E-01 |
| IQCG        | -0.06 | 8.09E-01 | 1.00E+00 | -0.19 | 4.03E-01 | 8.77E-01 |
| AL359962.2  | -2.05 | 7.16E-02 | 1.00E+00 | 0.58  | 4.03E-01 | 8.77E-01 |
| IL21        | -1.26 | 7.16E-01 | 1.00E+00 | -2.20 | 4.03E-01 | 8.77E-01 |
| KIRREL1-IT1 | -1.10 | 5.55E-01 | 1.00E+00 | 0.82  | 4.03E-01 | 8.77E-01 |
| KCNV2       | -0.06 | 9.86E-01 | 1.00E+00 | -1.60 | 4.03E-01 | 8.77E-01 |
| KCNQ5       | -1.33 | 4.26E-02 | 1.00E+00 | -0.69 | 4.03E-01 | 8.77E-01 |
| AC105036.3  | -2.73 | 3.24E-02 | 1.00E+00 | -0.63 | 4.03E-01 | 8.77E-01 |
| CRTC3       | -0.01 | 9.61E-01 | 1.00E+00 | 0.34  | 4.03E-01 | 8.77E-01 |
| HMGB2       | 0.25  | 2.82E-01 | 1.00E+00 | -0.16 | 4.03E-01 | 8.77E-01 |
| OTULINL     | -0.14 | 6.63E-01 | 1.00E+00 | 0.24  | 4.03E-01 | 8.77E-01 |
| NR1H3       | 0.53  | 2.78E-01 | 1.00E+00 | 0.40  | 4.04E-01 | 8.77E-01 |
| AC093772.1  | -2.45 | 2.70E-01 | 1.00E+00 | 1.41  | 4.04E-01 | 8.77E-01 |
| ICA1L       | -0.15 | 7.26E-01 | 1.00E+00 | -0.44 | 4.04E-01 | 8.77E-01 |
| DUOXA1      | -0.07 | 8.80E-01 | 1.00E+00 | 0.48  | 4.04E-01 | 8.77E-01 |
| AC245884.12 | 3.82  | 9.57E-02 | 1.00E+00 | 2.46  | 4.04E-01 | 8.77E-01 |
| CHM         | 0.22  | 3.22E-01 | 1.00E+00 | -0.16 | 4.04E-01 | 8.77E-01 |
| SGSM2       | 0.20  | 6.33E-01 | 1.00E+00 | 0.39  | 4.04E-01 | 8.77E-01 |
| MSH2        | -0.13 | 6.08E-01 | 1.00E+00 | -0.19 | 4.04E-01 | 8.77E-01 |
| LPP-AS2     | 0.39  | 3.04E-01 | 1.00E+00 | -0.37 | 4.04E-01 | 8.77E-01 |
| LAMTOR4     | 0.34  | 2.43E-01 | 1.00E+00 | -0.38 | 4.04E-01 | 8.77E-01 |
| MTA1        | -0.15 | 5.30E-01 | 1.00E+00 | 0.53  | 4.04E-01 | 8.77E-01 |
| TCEANC2     | 0.13  | 5.36E-01 | 1.00E+00 | -0.20 | 4.04E-01 | 8.77E-01 |
| AP002884.1  | 0.55  | 2.61E-01 | 1.00E+00 | -0.47 | 4.04E-01 | 8.77E-01 |
| RPL7AP50    | -1.70 | 6.79E-02 | 1.00E+00 | -0.48 | 4.04E-01 | 8.77E-01 |
| CEBPG       | 0.14  | 6.05E-01 | 1.00E+00 | -0.15 | 4.04E-01 | 8.77E-01 |
| GAS8        | -0.19 | 4.97E-01 | 1.00E+00 | 0.26  | 4.04E-01 | 8.77E-01 |
| ZBTB2       | -0.05 | 8.16E-01 | 1.00E+00 | 0.17  | 4.04E-01 | 8.78E-01 |
| RDH5        | 2.87  | 4.09E-02 | 1.00E+00 | -0.54 | 4.04E-01 | 8.78E-01 |
| SPATA33     | -0.21 | 6.20E-01 | 1.00E+00 | -0.20 | 4.05E-01 | 8.78E-01 |
| EDDM13      | -0.04 | 9.54E-01 | 1.00E+00 | -0.42 | 4.05E-01 | 8.78E-01 |
| POLH        | -0.35 | 2.27E-01 | 1.00E+00 | 0.24  | 4.05E-01 | 8.78E-01 |

|             |       |          |          |       |          |          |
|-------------|-------|----------|----------|-------|----------|----------|
| PLEKHJ1     | 0.01  | 9.60E-01 | 1.00E+00 | 0.15  | 4.05E-01 | 8.78E-01 |
| NEU3        | 0.37  | 3.58E-01 | 1.00E+00 | 0.34  | 4.05E-01 | 8.78E-01 |
| GDPD2       | 0.02  | 9.59E-01 | 1.00E+00 | -0.73 | 4.05E-01 | 8.78E-01 |
| JMY         | -0.23 | 4.55E-01 | 1.00E+00 | 0.30  | 4.05E-01 | 8.78E-01 |
| PDPR        | 0.21  | 5.62E-01 | 1.00E+00 | 0.33  | 4.05E-01 | 8.78E-01 |
| AC018529.2  | 1.28  | 3.67E-01 | 1.00E+00 | 0.88  | 4.05E-01 | 8.78E-01 |
| SLC30A1     | -0.14 | 6.97E-01 | 1.00E+00 | -0.32 | 4.05E-01 | 8.78E-01 |
| BIRC7       | -0.32 | 5.93E-01 | 1.00E+00 | -0.54 | 4.05E-01 | 8.78E-01 |
| MTPN        | 0.03  | 8.58E-01 | 1.00E+00 | 0.20  | 4.05E-01 | 8.78E-01 |
| FAM104A     | 0.01  | 9.74E-01 | 1.00E+00 | -0.24 | 4.05E-01 | 8.78E-01 |
| ZNF212      | -0.09 | 7.01E-01 | 1.00E+00 | 0.17  | 4.06E-01 | 8.78E-01 |
| EDEM1       | 0.60  | 6.07E-03 | 4.63E-01 | 0.17  | 4.06E-01 | 8.78E-01 |
| AC092894.1  | -0.40 | 7.19E-01 | 1.00E+00 | 1.03  | 4.06E-01 | 8.78E-01 |
| EXT1        | -0.32 | 2.87E-01 | 1.00E+00 | 0.33  | 4.06E-01 | 8.78E-01 |
| MAP1LC3B    | 0.10  | 6.79E-01 | 1.00E+00 | -0.24 | 4.06E-01 | 8.78E-01 |
| AL844908.1  | 0.08  | 9.34E-01 | 1.00E+00 | -0.85 | 4.06E-01 | 8.78E-01 |
| CLEC2A      | 0.44  | 3.80E-01 | 1.00E+00 | -0.75 | 4.06E-01 | 8.78E-01 |
| TLK1        | -0.17 | 4.30E-01 | 1.00E+00 | -0.29 | 4.06E-01 | 8.78E-01 |
| XLOC_001664 | -0.53 | 5.72E-01 | 1.00E+00 | -1.22 | 4.06E-01 | 8.78E-01 |
| AC036108.1  | 0.56  | 8.71E-01 | 1.00E+00 | 1.29  | 4.06E-01 | 8.78E-01 |
| NOP10       | 0.04  | 8.52E-01 | 1.00E+00 | -0.29 | 4.06E-01 | 8.78E-01 |
| NOVA2       | -0.04 | 9.35E-01 | 1.00E+00 | 0.55  | 4.06E-01 | 8.78E-01 |
| AC068987.5  | 1.68  | 5.11E-02 | 1.00E+00 | 0.92  | 4.06E-01 | 8.78E-01 |
| AC010468.1  | 0.24  | 7.55E-01 | 1.00E+00 | -0.48 | 4.06E-01 | 8.78E-01 |
| XLOC_012692 | -0.59 | 1.26E-01 | 1.00E+00 | 0.61  | 4.06E-01 | 8.78E-01 |
| G26344      | 0.30  | 5.94E-01 | 1.00E+00 | -0.76 | 4.06E-01 | 8.78E-01 |
| COL15A1     | 0.04  | 9.41E-01 | 1.00E+00 | 0.57  | 4.06E-01 | 8.78E-01 |
| ZDHHC2      | 0.25  | 6.12E-01 | 1.00E+00 | -0.28 | 4.06E-01 | 8.78E-01 |
| PLA2G2A     | 0.39  | 5.48E-01 | 1.00E+00 | -0.57 | 4.06E-01 | 8.78E-01 |
| U52111.1    | 1.61  | 2.47E-01 | 1.00E+00 | 0.69  | 4.06E-01 | 8.79E-01 |
| ADSL        | -0.67 | 2.02E-01 | 1.00E+00 | 0.30  | 4.06E-01 | 8.79E-01 |
| P2RX7       | 0.21  | 4.67E-01 | 1.00E+00 | 0.28  | 4.06E-01 | 8.79E-01 |

|                    |       |          |          |       |          |          |
|--------------------|-------|----------|----------|-------|----------|----------|
| <b>AL139317.5</b>  | -1.84 | 5.92E-01 | 1.00E+00 | -0.90 | 4.06E-01 | 8.79E-01 |
| <b>YEATS2-AS1</b>  | -3.51 | 1.46E-01 | 1.00E+00 | 1.14  | 4.06E-01 | 8.79E-01 |
| <b>SARS</b>        | -0.10 | 6.10E-01 | 1.00E+00 | 0.15  | 4.06E-01 | 8.79E-01 |
| <b>AP001646.1</b>  | 1.44  | 6.75E-01 | 1.00E+00 | 1.29  | 4.06E-01 | 8.79E-01 |
| <b>KLF8</b>        | -0.15 | 6.01E-01 | 1.00E+00 | -0.18 | 4.07E-01 | 8.79E-01 |
| <b>CTTNBP2NL</b>   | -0.31 | 2.94E-01 | 1.00E+00 | -0.16 | 4.07E-01 | 8.79E-01 |
| <b>XLOC_004195</b> | 1.26  | 2.68E-01 | 1.00E+00 | -0.95 | 4.07E-01 | 8.79E-01 |
| <b>CNKSR1</b>      | -0.15 | 5.93E-01 | 1.00E+00 | 0.45  | 4.07E-01 | 8.79E-01 |
| <b>ATMIN</b>       | -0.04 | 8.44E-01 | 1.00E+00 | -0.32 | 4.07E-01 | 8.79E-01 |
| <b>ECT2</b>        | -0.04 | 8.90E-01 | 1.00E+00 | 0.25  | 4.07E-01 | 8.79E-01 |
| <b>PLK5</b>        | -0.31 | 8.60E-01 | 1.00E+00 | 1.24  | 4.07E-01 | 8.79E-01 |
| <b>XLOC_005542</b> | 0.68  | 1.76E-01 | 1.00E+00 | 0.51  | 4.07E-01 | 8.79E-01 |
| <b>G36324</b>      | -2.98 | 5.91E-02 | 1.00E+00 | 1.19  | 4.07E-01 | 8.79E-01 |
| <b>SPINK1</b>      | 0.68  | 5.22E-01 | 1.00E+00 | 0.85  | 4.07E-01 | 8.79E-01 |
| <b>SRP19</b>       | -0.06 | 8.20E-01 | 1.00E+00 | -0.32 | 4.07E-01 | 8.79E-01 |
| <b>PLCD1</b>       | -0.08 | 6.94E-01 | 1.00E+00 | 0.26  | 4.07E-01 | 8.79E-01 |
| <b>DEFB4A</b>      | -2.99 | 2.98E-01 | 1.00E+00 | 2.61  | 4.07E-01 | 8.79E-01 |
| <b>C1orf115</b>    | 0.50  | 4.34E-01 | 1.00E+00 | -0.55 | 4.07E-01 | 8.79E-01 |
| <b>EPHX2</b>       | -0.18 | 6.29E-01 | 1.00E+00 | -0.28 | 4.07E-01 | 8.79E-01 |
| <b>DCXR</b>        | 0.03  | 8.97E-01 | 1.00E+00 | -0.19 | 4.07E-01 | 8.79E-01 |
| <b>LINC01806</b>   | -0.99 | 1.79E-02 | 8.39E-01 | 0.39  | 4.07E-01 | 8.79E-01 |
| <b>ACOT9</b>       | 0.25  | 4.39E-01 | 1.00E+00 | 0.17  | 4.07E-01 | 8.79E-01 |
| <b>AC092747.4</b>  | 0.14  | 6.31E-01 | 1.00E+00 | 0.29  | 4.07E-01 | 8.79E-01 |
| <b>FRMD5</b>       | -0.80 | 2.14E-01 | 1.00E+00 | 0.79  | 4.07E-01 | 8.79E-01 |
| <b>CACNB3</b>      | -0.58 | 3.65E-02 | 1.00E+00 | 0.25  | 4.07E-01 | 8.79E-01 |
| <b>ATRIP</b>       | -0.07 | 8.09E-01 | 1.00E+00 | -0.32 | 4.07E-01 | 8.79E-01 |
| <b>SLFN12L</b>     | 0.50  | 5.17E-01 | 1.00E+00 | 0.75  | 4.07E-01 | 8.79E-01 |
| <b>FUT10</b>       | 0.08  | 7.17E-01 | 1.00E+00 | -0.27 | 4.07E-01 | 8.79E-01 |
| <b>DGAT1</b>       | 0.10  | 8.12E-01 | 1.00E+00 | -0.49 | 4.07E-01 | 8.79E-01 |
| <b>SNRPEP2</b>     | -0.34 | 9.22E-01 | 1.00E+00 | -0.57 | 4.07E-01 | 8.79E-01 |
| <b>AL163541.1</b>  | -2.45 | 3.52E-01 | 1.00E+00 | -1.87 | 4.07E-01 | 8.79E-01 |
| <b>AATF</b>        | -0.14 | 5.33E-01 | 1.00E+00 | 0.12  | 4.07E-01 | 8.79E-01 |



|             |       |          |          |       |          |          |
|-------------|-------|----------|----------|-------|----------|----------|
| KCNN3       | -0.10 | 7.84E-01 | 1.00E+00 | 0.43  | 4.08E-01 | 8.79E-01 |
| RGS5        | 0.13  | 8.25E-01 | 1.00E+00 | -0.40 | 4.08E-01 | 8.79E-01 |
| ANKRD36     | 0.68  | 7.39E-02 | 1.00E+00 | 0.27  | 4.08E-01 | 8.79E-01 |
| TFIP11      | -0.20 | 3.29E-01 | 1.00E+00 | 0.19  | 4.08E-01 | 8.79E-01 |
| XLOC_010040 | 0.14  | 9.02E-01 | 1.00E+00 | -1.06 | 4.08E-01 | 8.79E-01 |
| TMCO6       | -0.39 | 1.63E-01 | 1.00E+00 | -0.43 | 4.08E-01 | 8.79E-01 |
| PRRC2C      | -0.32 | 2.18E-01 | 1.00E+00 | 0.29  | 4.08E-01 | 8.79E-01 |
| ERBB4       | 0.58  | 3.79E-01 | 1.00E+00 | -0.67 | 4.08E-01 | 8.79E-01 |
| HFM1        | 0.18  | 8.10E-01 | 1.00E+00 | -0.80 | 4.08E-01 | 8.79E-01 |
| AC063948.1  | -0.51 | 5.42E-01 | 1.00E+00 | -0.55 | 4.08E-01 | 8.79E-01 |
| ZNF586      | 0.08  | 8.14E-01 | 1.00E+00 | 0.25  | 4.08E-01 | 8.79E-01 |
| RNF170      | 0.13  | 6.56E-01 | 1.00E+00 | -0.21 | 4.08E-01 | 8.79E-01 |
| API5        | 0.06  | 7.43E-01 | 1.00E+00 | -0.18 | 4.08E-01 | 8.79E-01 |
| SLC38A6     | 0.09  | 8.30E-01 | 1.00E+00 | -0.39 | 4.08E-01 | 8.79E-01 |
| LGI4        | -0.03 | 9.42E-01 | 1.00E+00 | 0.57  | 4.08E-01 | 8.79E-01 |
| GTDC1       | 0.01  | 9.66E-01 | 1.00E+00 | -0.22 | 4.08E-01 | 8.79E-01 |
| SPRR2B      | -0.83 | 3.50E-01 | 1.00E+00 | 2.59  | 4.08E-01 | 8.79E-01 |
| AC104819.3  | 1.14  | 9.67E-02 | 1.00E+00 | 0.69  | 4.08E-01 | 8.79E-01 |
| POU5F2      | -0.50 | 7.17E-01 | 1.00E+00 | -0.79 | 4.08E-01 | 8.79E-01 |
| CNIH2       | -1.02 | 7.30E-03 | 5.19E-01 | -0.63 | 4.08E-01 | 8.79E-01 |
| HSPD1P1     | 0.09  | 9.57E-01 | 1.00E+00 | -0.40 | 4.08E-01 | 8.79E-01 |
| AL662907.2  | -0.25 | 7.94E-01 | 1.00E+00 | 0.67  | 4.08E-01 | 8.79E-01 |
| AC239799.2  | 0.88  | 2.36E-01 | 1.00E+00 | -0.72 | 4.08E-01 | 8.79E-01 |
| JMJD8       | -0.16 | 5.22E-01 | 1.00E+00 | -0.44 | 4.08E-01 | 8.79E-01 |
| AP000351.10 | -1.51 | 4.38E-01 | 1.00E+00 | 0.87  | 4.08E-01 | 8.79E-01 |
| TBC1D14     | 0.05  | 8.22E-01 | 1.00E+00 | 0.27  | 4.08E-01 | 8.79E-01 |
| ANKRD11     | -0.28 | 2.68E-01 | 1.00E+00 | 0.38  | 4.08E-01 | 8.79E-01 |
| DOP1B       | -0.50 | 1.36E-02 | 7.32E-01 | -0.30 | 4.08E-01 | 8.79E-01 |
| LPL         | 3.70  | 8.41E-03 | 5.67E-01 | -0.74 | 4.08E-01 | 8.79E-01 |
| TJP3        | -0.30 | 2.23E-01 | 1.00E+00 | -0.43 | 4.09E-01 | 8.79E-01 |
| FGFR1       | 0.52  | 2.85E-01 | 1.00E+00 | 0.48  | 4.09E-01 | 8.79E-01 |
| COQ2        | -0.03 | 9.44E-01 | 1.00E+00 | -0.27 | 4.09E-01 | 8.79E-01 |

|                    |       |          |          |       |          |          |
|--------------------|-------|----------|----------|-------|----------|----------|
| <b>C20orf144</b>   | -2.06 | 3.43E-01 | 1.00E+00 | -0.96 | 4.09E-01 | 8.79E-01 |
| <b>PRPF31</b>      | -0.16 | 4.85E-01 | 1.00E+00 | 0.14  | 4.09E-01 | 8.79E-01 |
| <b>ILK</b>         | 5.13  | 3.79E-02 | 1.00E+00 | 0.72  | 4.09E-01 | 8.79E-01 |
| <b>HEBP1</b>       | 0.22  | 2.66E-01 | 1.00E+00 | -0.17 | 4.09E-01 | 8.79E-01 |
| <b>AC068587.2</b>  | -0.47 | 5.95E-01 | 1.00E+00 | -0.54 | 4.09E-01 | 8.79E-01 |
| <b>NDUFB8</b>      | -0.38 | 5.29E-01 | 1.00E+00 | -0.61 | 4.09E-01 | 8.79E-01 |
| <b>NIPA1</b>       | 0.01  | 9.56E-01 | 1.00E+00 | -0.43 | 4.09E-01 | 8.79E-01 |
| <b>RPL5P1</b>      | 0.44  | 8.99E-01 | 1.00E+00 | -0.64 | 4.09E-01 | 8.79E-01 |
| <b>SSRP1</b>       | -0.15 | 4.56E-01 | 1.00E+00 | 0.27  | 4.09E-01 | 8.79E-01 |
| <b>CATSPERE</b>    | -0.32 | 7.58E-01 | 1.00E+00 | -0.62 | 4.09E-01 | 8.79E-01 |
| <b>RHOBTB3</b>     | 0.39  | 1.53E-01 | 1.00E+00 | -0.35 | 4.09E-01 | 8.79E-01 |
| <b>G26250</b>      | 0.76  | 5.26E-01 | 1.00E+00 | -0.78 | 4.09E-01 | 8.79E-01 |
| <b>LINC01588</b>   | 0.30  | 5.21E-01 | 1.00E+00 | -0.29 | 4.09E-01 | 8.79E-01 |
| <b>SLTM</b>        | 0.05  | 8.06E-01 | 1.00E+00 | 0.20  | 4.09E-01 | 8.79E-01 |
| <b>TUBA3FP</b>     | -2.69 | 4.26E-01 | 1.00E+00 | -1.12 | 4.09E-01 | 8.79E-01 |
| <b>ALDH3A1</b>     | 0.02  | 9.66E-01 | 1.00E+00 | -0.50 | 4.09E-01 | 8.79E-01 |
| <b>ICOS</b>        | -0.38 | 7.28E-01 | 1.00E+00 | 2.60  | 4.09E-01 | 8.79E-01 |
| <b>XLOC_006415</b> | -1.16 | 7.37E-01 | 1.00E+00 | 1.41  | 4.09E-01 | 8.79E-01 |
| <b>PCDHGB7</b>     | -0.04 | 9.02E-01 | 1.00E+00 | 0.41  | 4.09E-01 | 8.79E-01 |
| <b>TRIP4</b>       | -0.02 | 9.35E-01 | 1.00E+00 | 0.12  | 4.09E-01 | 8.79E-01 |
| <b>AP000759.1</b>  | -0.62 | 1.70E-01 | 1.00E+00 | 0.49  | 4.09E-01 | 8.79E-01 |
| <b>ENPP6</b>       | 1.55  | 1.81E-01 | 1.00E+00 | 0.78  | 4.09E-01 | 8.79E-01 |
| <b>HCP5</b>        | 0.12  | 7.47E-01 | 1.00E+00 | 0.30  | 4.09E-01 | 8.79E-01 |
| <b>AC078785.1</b>  | -1.82 | 2.11E-01 | 1.00E+00 | 0.61  | 4.09E-01 | 8.79E-01 |
| <b>TSPO</b>        | -0.06 | 8.40E-01 | 1.00E+00 | 0.20  | 4.09E-01 | 8.79E-01 |
| <b>MAN1A1</b>      | 0.76  | 7.16E-03 | 5.13E-01 | 0.45  | 4.10E-01 | 8.79E-01 |
| <b>IFNGR1</b>      | 0.22  | 2.80E-01 | 1.00E+00 | -0.22 | 4.10E-01 | 8.79E-01 |
| <b>PSMD12</b>      | -0.12 | 5.16E-01 | 1.00E+00 | -0.21 | 4.10E-01 | 8.79E-01 |
| <b>RPL37A</b>      | -0.09 | 7.66E-01 | 1.00E+00 | 0.24  | 4.10E-01 | 8.79E-01 |
| <b>DEPDC5</b>      | -0.10 | 7.52E-01 | 1.00E+00 | 0.36  | 4.10E-01 | 8.79E-01 |
| <b>AC026401.2</b>  | -0.88 | 7.20E-01 | 1.00E+00 | 0.77  | 4.10E-01 | 8.79E-01 |
| <b>F2RL2</b>       | -0.42 | 5.01E-01 | 1.00E+00 | 0.48  | 4.10E-01 | 8.79E-01 |

|                    |       |          |          |       |          |          |
|--------------------|-------|----------|----------|-------|----------|----------|
| <b>AC015813.5</b>  | -3.16 | 1.72E-02 | 8.25E-01 | 0.58  | 4.10E-01 | 8.79E-01 |
| <b>TAF1B</b>       | -0.26 | 1.94E-01 | 1.00E+00 | -0.19 | 4.10E-01 | 8.79E-01 |
| <b>AC073389.1</b>  | -0.33 | 6.32E-01 | 1.00E+00 | -0.47 | 4.10E-01 | 8.79E-01 |
| <b>MTND4P12</b>    | 0.44  | 3.57E-01 | 1.00E+00 | 0.63  | 4.10E-01 | 8.79E-01 |
| <b>AKIP1</b>       | -0.12 | 6.13E-01 | 1.00E+00 | 0.19  | 4.10E-01 | 8.79E-01 |
| <b>AL662907.1</b>  | -0.35 | 5.66E-01 | 1.00E+00 | 0.73  | 4.10E-01 | 8.79E-01 |
| <b>AP001330.5</b>  | -0.68 | 3.63E-01 | 1.00E+00 | 0.55  | 4.10E-01 | 8.79E-01 |
| <b>CMTM3</b>       | 0.05  | 8.76E-01 | 1.00E+00 | 0.51  | 4.10E-01 | 8.79E-01 |
| <b>NECAP1</b>      | 0.25  | 2.71E-01 | 1.00E+00 | -0.19 | 4.10E-01 | 8.79E-01 |
| <b>CEACAM5</b>     | 0.17  | 8.05E-01 | 1.00E+00 | -0.56 | 4.10E-01 | 8.79E-01 |
| <b>DALRD3</b>      | 0.12  | 5.25E-01 | 1.00E+00 | 0.16  | 4.10E-01 | 8.79E-01 |
| <b>AL513122.2</b>  | -2.81 | 1.55E-01 | 1.00E+00 | -0.95 | 4.10E-01 | 8.79E-01 |
| <b>GATAD2A</b>     | -0.31 | 3.16E-01 | 1.00E+00 | 0.32  | 4.10E-01 | 8.79E-01 |
| <b>AC080013.5</b>  | -2.09 | 2.12E-01 | 1.00E+00 | -0.74 | 4.10E-01 | 8.79E-01 |
| <b>PSMG3-AS1</b>   | 0.02  | 9.74E-01 | 1.00E+00 | 0.35  | 4.10E-01 | 8.79E-01 |
| <b>TAF1A</b>       | 0.28  | 6.28E-01 | 1.00E+00 | 0.49  | 4.10E-01 | 8.79E-01 |
| <b>TEX35</b>       | -0.59 | 5.57E-01 | 1.00E+00 | -0.93 | 4.10E-01 | 8.79E-01 |
| <b>ZNF790-AS1</b>  | -0.19 | 6.48E-01 | 1.00E+00 | -0.35 | 4.10E-01 | 8.79E-01 |
| <b>GPC5</b>        | 0.63  | 5.29E-01 | 1.00E+00 | -0.74 | 4.10E-01 | 8.79E-01 |
| <b>CCDC136</b>     | -0.72 | 2.63E-01 | 1.00E+00 | 0.54  | 4.10E-01 | 8.79E-01 |
| <b>TMX2</b>        | 0.10  | 6.52E-01 | 1.00E+00 | -0.16 | 4.10E-01 | 8.79E-01 |
| <b>GRIP1</b>       | -0.62 | 5.85E-02 | 1.00E+00 | -0.47 | 4.10E-01 | 8.79E-01 |
| <b>G23403</b>      | 1.20  | 5.22E-01 | 1.00E+00 | -0.75 | 4.11E-01 | 8.79E-01 |
| <b>ABCB1</b>       | -0.51 | 1.14E-01 | 1.00E+00 | 0.44  | 4.11E-01 | 8.79E-01 |
| <b>AC007448.3</b>  | -2.45 | 4.74E-01 | 1.00E+00 | -1.06 | 4.11E-01 | 8.79E-01 |
| <b>XLOC_005452</b> | 0.55  | 4.69E-01 | 1.00E+00 | 0.57  | 4.11E-01 | 8.79E-01 |
| <b>SMG6</b>        | -0.19 | 4.60E-01 | 1.00E+00 | 0.43  | 4.11E-01 | 8.79E-01 |
| <b>RAB11B-AS1</b>  | 0.20  | 7.90E-01 | 1.00E+00 | -0.33 | 4.11E-01 | 8.79E-01 |
| <b>CERS5</b>       | 0.07  | 6.11E-01 | 1.00E+00 | 0.10  | 4.11E-01 | 8.79E-01 |
| <b>FAM221A</b>     | 0.05  | 8.95E-01 | 1.00E+00 | -0.37 | 4.11E-01 | 8.79E-01 |
| <b>MT1E</b>        | 0.01  | 9.74E-01 | 1.00E+00 | -0.28 | 4.11E-01 | 8.79E-01 |
| <b>SAMD12</b>      | 0.11  | 7.54E-01 | 1.00E+00 | -0.31 | 4.11E-01 | 8.79E-01 |

|                   |       |          |          |       |          |          |
|-------------------|-------|----------|----------|-------|----------|----------|
| <b>AC010618.3</b> | 0.00  | 1.00E+00 | 1.00E+00 | 0.54  | 4.11E-01 | 8.79E-01 |
| <b>MRPL45</b>     | 0.04  | 8.31E-01 | 1.00E+00 | -0.17 | 4.11E-01 | 8.79E-01 |
| <b>GLT1D1</b>     | -1.08 | 7.29E-03 | 5.19E-01 | 0.54  | 4.11E-01 | 8.79E-01 |
| <b>FAM86EP</b>    | -0.57 | 1.11E-01 | 1.00E+00 | -0.42 | 4.11E-01 | 8.79E-01 |
| <b>SIL1</b>       | 0.12  | 7.04E-01 | 1.00E+00 | 0.11  | 4.11E-01 | 8.79E-01 |
| <b>CTNNB1</b>     | -0.11 | 5.70E-01 | 1.00E+00 | 0.26  | 4.11E-01 | 8.79E-01 |
| <b>CELSR1</b>     | -0.28 | 3.56E-01 | 1.00E+00 | 0.52  | 4.11E-01 | 8.79E-01 |
| <b>AC034236.1</b> | -0.18 | 7.41E-01 | 1.00E+00 | -0.42 | 4.11E-01 | 8.79E-01 |
| <b>SEL1L3</b>     | 0.08  | 7.93E-01 | 1.00E+00 | 0.47  | 4.11E-01 | 8.79E-01 |
| <b>LSP1P4</b>     | 0.54  | 4.51E-01 | 1.00E+00 | 0.35  | 4.11E-01 | 8.79E-01 |
| <b>ARHGEF7</b>    | 0.21  | 3.78E-01 | 1.00E+00 | 0.21  | 4.11E-01 | 8.79E-01 |
| <b>RCAN2</b>      | 0.17  | 6.68E-01 | 1.00E+00 | -0.36 | 4.11E-01 | 8.79E-01 |
| <b>PIANP</b>      | 1.14  | 2.85E-01 | 1.00E+00 | -0.89 | 4.11E-01 | 8.79E-01 |
| <b>AP003351.1</b> | -2.43 | 1.93E-01 | 1.00E+00 | 1.09  | 4.11E-01 | 8.79E-01 |
| <b>HNRNPM</b>     | -0.17 | 4.18E-01 | 1.00E+00 | 0.16  | 4.12E-01 | 8.79E-01 |
| <b>MARVELD1</b>   | -0.13 | 6.85E-01 | 1.00E+00 | 0.42  | 4.12E-01 | 8.79E-01 |
| <b>AADA3L3</b>    | 0.97  | 7.63E-01 | 1.00E+00 | -2.57 | 4.12E-01 | 8.79E-01 |
| <b>TSHZ1</b>      | -0.16 | 4.84E-01 | 1.00E+00 | 0.28  | 4.12E-01 | 8.79E-01 |
| <b>PCAT6</b>      | -0.56 | 3.12E-01 | 1.00E+00 | -0.39 | 4.12E-01 | 8.79E-01 |
| <b>SLC23A2</b>    | 0.28  | 5.73E-01 | 1.00E+00 | 0.34  | 4.12E-01 | 8.79E-01 |
| <b>PRELID2</b>    | -0.12 | 6.90E-01 | 1.00E+00 | -0.27 | 4.12E-01 | 8.79E-01 |
| <b>PGR</b>        | 0.54  | 3.20E-01 | 1.00E+00 | 0.43  | 4.12E-01 | 8.79E-01 |
| <b>CIR1</b>       | 0.07  | 6.96E-01 | 1.00E+00 | 0.18  | 4.12E-01 | 8.79E-01 |
| <b>TMEM116</b>    | 0.35  | 7.15E-02 | 1.00E+00 | -0.36 | 4.12E-01 | 8.79E-01 |
| <b>TAS2R5</b>     | -2.08 | 5.05E-01 | 1.00E+00 | 1.30  | 4.12E-01 | 8.80E-01 |
| <b>TUBB4B</b>     | -0.64 | 8.21E-02 | 1.00E+00 | -0.22 | 4.12E-01 | 8.80E-01 |
| <b>SUPV3L1</b>    | 0.26  | 2.39E-01 | 1.00E+00 | -0.14 | 4.12E-01 | 8.80E-01 |
| <b>PTPRS</b>      | -0.02 | 9.45E-01 | 1.00E+00 | 0.61  | 4.12E-01 | 8.80E-01 |
| <b>SLC22A18AS</b> | 0.12  | 8.28E-01 | 1.00E+00 | 0.29  | 4.12E-01 | 8.80E-01 |
| <b>AL354696.1</b> | -0.44 | 6.95E-01 | 1.00E+00 | 0.84  | 4.13E-01 | 8.80E-01 |
| <b>ZNF432</b>     | 0.09  | 8.03E-01 | 1.00E+00 | 0.38  | 4.13E-01 | 8.80E-01 |
| <b>KHSRP</b>      | -0.28 | 2.27E-01 | 1.00E+00 | 0.48  | 4.13E-01 | 8.80E-01 |

|                    |       |          |          |       |          |          |
|--------------------|-------|----------|----------|-------|----------|----------|
| <b>HBP1</b>        | 0.15  | 5.05E-01 | 1.00E+00 | -0.27 | 4.13E-01 | 8.80E-01 |
| <b>AC138696.2</b>  | -0.01 | 9.90E-01 | 1.00E+00 | -0.44 | 4.13E-01 | 8.80E-01 |
| <b>G26573</b>      | -1.18 | 3.12E-01 | 1.00E+00 | -0.60 | 4.13E-01 | 8.80E-01 |
| <b>ANKRD37</b>     | -0.04 | 8.58E-01 | 1.00E+00 | 0.24  | 4.13E-01 | 8.80E-01 |
| <b>PLD6</b>        | -0.55 | 1.87E-01 | 1.00E+00 | -0.35 | 4.13E-01 | 8.80E-01 |
| <b>PGM5P2</b>      | 0.72  | 3.92E-01 | 1.00E+00 | -0.57 | 4.13E-01 | 8.80E-01 |
| <b>AIG1</b>        | 0.13  | 6.32E-01 | 1.00E+00 | -0.21 | 4.13E-01 | 8.80E-01 |
| <b>SMG1P5</b>      | 0.28  | 5.80E-01 | 1.00E+00 | -0.39 | 4.13E-01 | 8.80E-01 |
| <b>ZNF430</b>      | -0.03 | 9.09E-01 | 1.00E+00 | -0.29 | 4.13E-01 | 8.80E-01 |
| <b>AC116351.1</b>  | 0.53  | 7.31E-01 | 1.00E+00 | -1.15 | 4.13E-01 | 8.80E-01 |
| <b>BAZ1B</b>       | 0.08  | 7.19E-01 | 1.00E+00 | 0.34  | 4.13E-01 | 8.80E-01 |
| <b>AC073896.3</b>  | 0.83  | 5.55E-01 | 1.00E+00 | -0.48 | 4.13E-01 | 8.80E-01 |
| <b>AC012414.5</b>  | 1.13  | 3.06E-01 | 1.00E+00 | 0.76  | 4.13E-01 | 8.80E-01 |
| <b>STK32A-AS1</b>  | 0.28  | 7.88E-01 | 1.00E+00 | -0.67 | 4.13E-01 | 8.80E-01 |
| <b>AC005586.1</b>  | -0.80 | 3.63E-01 | 1.00E+00 | -0.68 | 4.13E-01 | 8.80E-01 |
| <b>RPL21P1</b>     | -0.56 | 8.73E-01 | 1.00E+00 | -0.60 | 4.13E-01 | 8.80E-01 |
| <b>CCNF</b>        | -0.02 | 9.36E-01 | 1.00E+00 | -0.44 | 4.13E-01 | 8.80E-01 |
| <b>FAT2</b>        | -0.43 | 2.15E-01 | 1.00E+00 | 0.45  | 4.13E-01 | 8.80E-01 |
| <b>GALNTL6</b>     | 0.04  | 9.60E-01 | 1.00E+00 | 0.81  | 4.13E-01 | 8.80E-01 |
| <b>TCF20</b>       | -0.47 | 6.30E-02 | 1.00E+00 | 0.54  | 4.14E-01 | 8.80E-01 |
| <b>EBP</b>         | -0.10 | 7.53E-01 | 1.00E+00 | -0.27 | 4.14E-01 | 8.80E-01 |
| <b>IL17RA</b>      | 0.01  | 9.64E-01 | 1.00E+00 | 0.48  | 4.14E-01 | 8.80E-01 |
| <b>ACOX2</b>       | 0.98  | 1.19E-01 | 1.00E+00 | -0.44 | 4.14E-01 | 8.80E-01 |
| <b>CLK4</b>        | 0.18  | 7.03E-01 | 1.00E+00 | -0.25 | 4.14E-01 | 8.81E-01 |
| <b>LYST</b>        | 0.11  | 6.82E-01 | 1.00E+00 | -0.18 | 4.14E-01 | 8.81E-01 |
| <b>AC004637.1</b>  | 0.33  | 8.61E-01 | 1.00E+00 | 1.35  | 4.14E-01 | 8.81E-01 |
| <b>SPESP1</b>      | -1.12 | 1.03E-01 | 1.00E+00 | -0.43 | 4.14E-01 | 8.81E-01 |
| <b>ZP3</b>         | 0.22  | 4.42E-01 | 1.00E+00 | -0.32 | 4.14E-01 | 8.81E-01 |
| <b>GPAT4</b>       | 0.10  | 6.16E-01 | 1.00E+00 | 0.23  | 4.14E-01 | 8.81E-01 |
| <b>APELA</b>       | -0.71 | 4.28E-01 | 1.00E+00 | 0.79  | 4.14E-01 | 8.81E-01 |
| <b>METTL6</b>      | 0.19  | 4.08E-01 | 1.00E+00 | -0.20 | 4.14E-01 | 8.81E-01 |
| <b>XLOC_006898</b> | 0.01  | 9.92E-01 | 1.00E+00 | -0.69 | 4.14E-01 | 8.81E-01 |

|                    |       |          |          |       |          |          |
|--------------------|-------|----------|----------|-------|----------|----------|
| <b>FTSJ3</b>       | -0.13 | 4.74E-01 | 1.00E+00 | 0.20  | 4.14E-01 | 8.81E-01 |
| <b>DDX56</b>       | -0.12 | 5.50E-01 | 1.00E+00 | 0.14  | 4.14E-01 | 8.81E-01 |
| <b>ATAD2</b>       | 0.38  | 2.13E-01 | 1.00E+00 | -0.27 | 4.14E-01 | 8.81E-01 |
| <b>AC025470.2</b>  | 2.18  | 3.29E-01 | 1.00E+00 | -0.83 | 4.14E-01 | 8.81E-01 |
| <b>ARMCX3</b>      | 0.54  | 2.61E-01 | 1.00E+00 | -0.25 | 4.14E-01 | 8.81E-01 |
| <b>AOC1</b>        | -1.36 | 4.08E-03 | 3.55E-01 | -0.62 | 4.14E-01 | 8.81E-01 |
| <b>BAIAP2-DT</b>   | -0.27 | 4.87E-01 | 1.00E+00 | 0.46  | 4.15E-01 | 8.81E-01 |
| <b>CD7</b>         | -0.76 | 2.56E-01 | 1.00E+00 | 2.55  | 4.15E-01 | 8.81E-01 |
| <b>NOP58</b>       | -0.13 | 6.11E-01 | 1.00E+00 | -0.27 | 4.15E-01 | 8.81E-01 |
| <b>LARP1</b>       | -0.27 | 2.41E-01 | 1.00E+00 | 0.30  | 4.15E-01 | 8.81E-01 |
| <b>EFCAB5</b>      | -2.68 | 3.29E-02 | 1.00E+00 | -0.64 | 4.15E-01 | 8.81E-01 |
| <b>XLOC_014403</b> | -0.41 | 8.00E-01 | 1.00E+00 | -0.70 | 4.15E-01 | 8.81E-01 |
| <b>G19572</b>      | 0.26  | 8.62E-01 | 1.00E+00 | 0.84  | 4.15E-01 | 8.81E-01 |
| <b>TSC22D3</b>     | 0.63  | 2.06E-01 | 1.00E+00 | -0.33 | 4.15E-01 | 8.81E-01 |
| <b>VGLL3</b>       | 0.29  | 3.77E-01 | 1.00E+00 | 0.38  | 4.15E-01 | 8.81E-01 |
| <b>XLOC_000294</b> | 1.39  | 5.22E-02 | 1.00E+00 | 0.39  | 4.15E-01 | 8.81E-01 |
| <b>BNIP3P11</b>    | -0.42 | 6.38E-01 | 1.00E+00 | 0.56  | 4.15E-01 | 8.81E-01 |
| <b>HDX</b>         | -0.25 | 5.34E-01 | 1.00E+00 | 0.30  | 4.15E-01 | 8.81E-01 |
| <b>CCNYL1</b>      | -0.29 | 3.01E-01 | 1.00E+00 | 0.42  | 4.15E-01 | 8.81E-01 |
| <b>ARHGAP26</b>    | 0.01  | 9.58E-01 | 1.00E+00 | 0.39  | 4.15E-01 | 8.81E-01 |
| <b>PIPOX</b>       | -0.29 | 5.41E-01 | 1.00E+00 | 0.47  | 4.15E-01 | 8.81E-01 |
| <b>KRT71</b>       | -6.02 | 6.82E-02 | 1.00E+00 | -2.56 | 4.15E-01 | 8.81E-01 |
| <b>UBLCP1</b>      | -0.01 | 9.75E-01 | 1.00E+00 | -0.11 | 4.15E-01 | 8.81E-01 |
| <b>IL11RA</b>      | 0.25  | 5.57E-01 | 1.00E+00 | 0.27  | 4.15E-01 | 8.81E-01 |
| <b>LINC01572</b>   | 2.72  | 1.11E-01 | 1.00E+00 | 0.73  | 4.15E-01 | 8.81E-01 |
| <b>CNNM2</b>       | -0.20 | 4.74E-01 | 1.00E+00 | 0.34  | 4.15E-01 | 8.81E-01 |
| <b>SMURF1</b>      | 0.12  | 5.70E-01 | 1.00E+00 | 0.31  | 4.15E-01 | 8.81E-01 |
| <b>AC007996.1</b>  | -0.39 | 5.72E-01 | 1.00E+00 | 0.52  | 4.15E-01 | 8.81E-01 |
| <b>TCAF2P1</b>     | 1.06  | 2.10E-01 | 1.00E+00 | 0.82  | 4.15E-01 | 8.81E-01 |
| <b>DHX38</b>       | -0.05 | 7.66E-01 | 1.00E+00 | 0.32  | 4.16E-01 | 8.81E-01 |
| <b>ZRANB1</b>      | 0.06  | 8.31E-01 | 1.00E+00 | -0.24 | 4.16E-01 | 8.81E-01 |
| <b>ZNF397</b>      | 0.19  | 5.38E-01 | 1.00E+00 | -0.19 | 4.16E-01 | 8.81E-01 |

|             |       |          |          |       |          |          |
|-------------|-------|----------|----------|-------|----------|----------|
| MRPL57      | -0.24 | 1.90E-01 | 1.00E+00 | -0.28 | 4.16E-01 | 8.81E-01 |
| SNX13       | 0.32  | 1.56E-01 | 1.00E+00 | -0.15 | 4.16E-01 | 8.81E-01 |
| FOXI1       | 0.59  | 6.37E-01 | 1.00E+00 | -2.46 | 4.16E-01 | 8.81E-01 |
| SEC13       | -0.17 | 3.93E-01 | 1.00E+00 | 0.11  | 4.16E-01 | 8.81E-01 |
| XLOC_010047 | -0.49 | 4.65E-01 | 1.00E+00 | -0.51 | 4.16E-01 | 8.81E-01 |
| SLC2A11     | 0.44  | 3.03E-01 | 1.00E+00 | 0.35  | 4.16E-01 | 8.81E-01 |
| LINC01356   | -2.25 | 3.54E-01 | 1.00E+00 | 1.13  | 4.16E-01 | 8.81E-01 |
| CCDC127     | 0.32  | 2.09E-01 | 1.00E+00 | 0.14  | 4.16E-01 | 8.81E-01 |
| U2SURP      | -0.34 | 1.20E-01 | 1.00E+00 | -0.19 | 4.16E-01 | 8.81E-01 |
| THAP11      | 0.16  | 4.98E-01 | 1.00E+00 | -0.23 | 4.16E-01 | 8.81E-01 |
| RBPM5       | 0.32  | 5.30E-01 | 1.00E+00 | -0.45 | 4.16E-01 | 8.81E-01 |
| GPM6A       | -0.65 | 8.11E-01 | 1.00E+00 | 0.69  | 4.16E-01 | 8.81E-01 |
| FAM84A      | -0.63 | 5.40E-02 | 1.00E+00 | 0.30  | 4.16E-01 | 8.82E-01 |
| TRIM15      | -3.84 | 2.01E-02 | 8.84E-01 | 2.56  | 4.16E-01 | 8.82E-01 |
| TMEM40      | 0.08  | 8.65E-01 | 1.00E+00 | 0.45  | 4.16E-01 | 8.82E-01 |
| RAG1        | -0.33 | 6.98E-01 | 1.00E+00 | 0.71  | 4.16E-01 | 8.82E-01 |
| ARHGEF5     | -0.25 | 5.29E-01 | 1.00E+00 | -0.38 | 4.16E-01 | 8.82E-01 |
| MRPL50      | 0.16  | 4.43E-01 | 1.00E+00 | -0.26 | 4.16E-01 | 8.82E-01 |
| ADAMTS5     | 0.80  | 7.12E-02 | 1.00E+00 | 0.51  | 4.16E-01 | 8.82E-01 |
| DNM1P35     | -1.06 | 3.20E-01 | 1.00E+00 | 1.17  | 4.16E-01 | 8.82E-01 |
| THTPA       | 0.53  | 2.52E-01 | 1.00E+00 | 0.28  | 4.16E-01 | 8.82E-01 |
| MFSD9       | -0.05 | 7.94E-01 | 1.00E+00 | 0.25  | 4.16E-01 | 8.82E-01 |
| RPL34P27    | -1.19 | 7.32E-01 | 1.00E+00 | -0.62 | 4.17E-01 | 8.82E-01 |
| PGAP3       | 0.04  | 8.04E-01 | 1.00E+00 | -0.26 | 4.17E-01 | 8.82E-01 |
| CENPP       | 0.02  | 9.52E-01 | 1.00E+00 | 0.29  | 4.17E-01 | 8.82E-01 |
| XLOC_009313 | 0.75  | 6.38E-01 | 1.00E+00 | -0.91 | 4.17E-01 | 8.82E-01 |
| LINC00854   | -1.11 | 2.13E-01 | 1.00E+00 | 0.46  | 4.17E-01 | 8.82E-01 |
| XLOC_007043 | 0.49  | 2.75E-01 | 1.00E+00 | 0.48  | 4.17E-01 | 8.82E-01 |
| XLOC_006349 | -0.74 | 2.81E-01 | 1.00E+00 | -0.54 | 4.17E-01 | 8.82E-01 |
| RNU6-529P   | 0.29  | 6.94E-01 | 1.00E+00 | 0.49  | 4.17E-01 | 8.82E-01 |
| AC067930.3  | 0.63  | 5.32E-01 | 1.00E+00 | -1.26 | 4.17E-01 | 8.82E-01 |
| KU-MEL-3    | -2.58 | 1.19E-02 | 6.78E-01 | 0.93  | 4.17E-01 | 8.82E-01 |

|             |       |          |          |       |          |          |
|-------------|-------|----------|----------|-------|----------|----------|
| SLC13A2     | -0.05 | 9.68E-01 | 1.00E+00 | -0.61 | 4.17E-01 | 8.82E-01 |
| SLC46A3     | -0.16 | 6.88E-01 | 1.00E+00 | -0.28 | 4.17E-01 | 8.82E-01 |
| FBXL18      | -0.17 | 6.53E-01 | 1.00E+00 | 0.43  | 4.17E-01 | 8.82E-01 |
| POPDC3      | 1.42  | 3.35E-01 | 1.00E+00 | 1.05  | 4.17E-01 | 8.82E-01 |
| ST3GAL5-AS1 | 0.18  | 8.45E-01 | 1.00E+00 | 0.65  | 4.17E-01 | 8.82E-01 |
| EEF1D       | -0.07 | 7.06E-01 | 1.00E+00 | 0.35  | 4.17E-01 | 8.82E-01 |
| DTX4        | 0.48  | 2.46E-01 | 1.00E+00 | 0.55  | 4.17E-01 | 8.82E-01 |
| SMCO2       | 0.95  | 4.09E-01 | 1.00E+00 | 0.98  | 4.17E-01 | 8.82E-01 |
| WDFY1       | 0.09  | 5.78E-01 | 1.00E+00 | 0.21  | 4.17E-01 | 8.82E-01 |
| SOX17       | -1.13 | 2.99E-02 | 9.97E-01 | -0.81 | 4.17E-01 | 8.82E-01 |
| AL136368.1  | 0.89  | 4.13E-01 | 1.00E+00 | -0.54 | 4.17E-01 | 8.82E-01 |
| G38764      | 0.08  | 9.53E-01 | 1.00E+00 | 0.85  | 4.17E-01 | 8.82E-01 |
| JPX         | -0.38 | 4.93E-01 | 1.00E+00 | -0.38 | 4.17E-01 | 8.82E-01 |
| USP11       | -0.01 | 9.75E-01 | 1.00E+00 | 0.14  | 4.17E-01 | 8.82E-01 |
| TFE3        | -0.01 | 9.65E-01 | 1.00E+00 | 0.38  | 4.17E-01 | 8.82E-01 |
| FBXO33      | -0.01 | 9.75E-01 | 1.00E+00 | -0.27 | 4.17E-01 | 8.82E-01 |
| CSPG4       | -0.29 | 5.90E-01 | 1.00E+00 | 0.50  | 4.17E-01 | 8.82E-01 |
| DUSP19      | 0.64  | 3.58E-01 | 1.00E+00 | -0.44 | 4.17E-01 | 8.82E-01 |
| TMEM147-AS1 | -0.32 | 5.45E-01 | 1.00E+00 | -0.34 | 4.17E-01 | 8.82E-01 |
| LRRN4CL     | 0.31  | 4.45E-01 | 1.00E+00 | 0.40  | 4.18E-01 | 8.82E-01 |
| BFSP2       | 0.58  | 5.28E-01 | 1.00E+00 | -0.68 | 4.18E-01 | 8.82E-01 |
| KRT16P3     | 0.15  | 9.30E-01 | 1.00E+00 | 0.57  | 4.18E-01 | 8.82E-01 |
| LRRC18      | 1.74  | 9.78E-02 | 1.00E+00 | -0.96 | 4.18E-01 | 8.82E-01 |
| DENND6A-AS1 | 0.49  | 8.88E-01 | 1.00E+00 | -0.72 | 4.18E-01 | 8.82E-01 |
| KHDC4       | 0.27  | 6.52E-01 | 1.00E+00 | 0.32  | 4.18E-01 | 8.82E-01 |
| RNU6-118P   | -0.11 | 9.70E-01 | 1.00E+00 | 1.07  | 4.18E-01 | 8.82E-01 |
| AQP7P2      | 4.17  | 2.90E-02 | 9.89E-01 | -0.91 | 4.18E-01 | 8.82E-01 |
| ABHD18      | 0.37  | 2.63E-01 | 1.00E+00 | -0.23 | 4.18E-01 | 8.82E-01 |
| KIAA1143    | -0.11 | 4.74E-01 | 1.00E+00 | -0.12 | 4.18E-01 | 8.82E-01 |
| PRDM1       | 0.01  | 9.91E-01 | 1.00E+00 | 0.31  | 4.18E-01 | 8.82E-01 |
| AC005034.3  | -0.11 | 6.94E-01 | 1.00E+00 | -0.30 | 4.18E-01 | 8.82E-01 |
| SRPK1       | 0.03  | 9.45E-01 | 1.00E+00 | 0.26  | 4.18E-01 | 8.82E-01 |



|                   |       |          |          |       |          |          |
|-------------------|-------|----------|----------|-------|----------|----------|
| <b>C6orf136</b>   | -0.03 | 9.21E-01 | 1.00E+00 | -0.24 | 4.18E-01 | 8.82E-01 |
| <b>STK40</b>      | 0.07  | 6.91E-01 | 1.00E+00 | -0.42 | 4.18E-01 | 8.82E-01 |
| <b>SPATC1L</b>    | -0.24 | 3.93E-01 | 1.00E+00 | -0.51 | 4.18E-01 | 8.82E-01 |
| <b>PPP1R15A</b>   | -1.30 | 5.12E-02 | 1.00E+00 | 0.35  | 4.18E-01 | 8.82E-01 |
| <b>CFI</b>        | 0.69  | 4.68E-01 | 1.00E+00 | -0.47 | 4.18E-01 | 8.82E-01 |
| <b>AC099524.1</b> | 0.25  | 9.42E-01 | 1.00E+00 | 1.30  | 4.18E-01 | 8.82E-01 |
| <b>SLC27A4</b>    | -0.29 | 4.44E-01 | 1.00E+00 | 0.31  | 4.18E-01 | 8.82E-01 |
| <b>DDIT4</b>      | -0.03 | 9.59E-01 | 1.00E+00 | 0.35  | 4.18E-01 | 8.82E-01 |
| <b>CYP4F26P</b>   | -0.07 | 9.37E-01 | 1.00E+00 | 0.62  | 4.18E-01 | 8.82E-01 |
| <b>ZNF70</b>      | 0.50  | 1.40E-01 | 1.00E+00 | 0.40  | 4.18E-01 | 8.82E-01 |
| <b>PRR15</b>      | -0.76 | 4.75E-01 | 1.00E+00 | 0.59  | 4.18E-01 | 8.82E-01 |
| <b>CCDC170</b>    | 0.51  | 3.02E-01 | 1.00E+00 | 0.50  | 4.19E-01 | 8.82E-01 |
| <b>AMBRA1</b>     | -0.27 | 2.18E-01 | 1.00E+00 | 0.40  | 4.19E-01 | 8.82E-01 |
| <b>G37757</b>     | -2.87 | 2.82E-01 | 1.00E+00 | 0.88  | 4.19E-01 | 8.82E-01 |
| <b>RNU6-6P</b>    | -2.07 | 5.48E-01 | 1.00E+00 | 0.90  | 4.19E-01 | 8.82E-01 |
| <b>NFATC3</b>     | -0.06 | 7.64E-01 | 1.00E+00 | -0.18 | 4.19E-01 | 8.82E-01 |
| <b>MIR4754</b>    | 2.97  | 3.82E-01 | 1.00E+00 | 0.79  | 4.19E-01 | 8.82E-01 |
| <b>AL121839.2</b> | 0.79  | 1.24E-01 | 1.00E+00 | -0.50 | 4.19E-01 | 8.82E-01 |
| <b>ZNF521</b>     | 0.27  | 5.25E-01 | 1.00E+00 | 0.37  | 4.19E-01 | 8.83E-01 |
| <b>DBF4B</b>      | -0.62 | 9.79E-02 | 1.00E+00 | 0.43  | 4.19E-01 | 8.83E-01 |
| <b>TINCR</b>      | 0.04  | 9.17E-01 | 1.00E+00 | -0.49 | 4.19E-01 | 8.83E-01 |
| <b>PLAC8L1</b>    | 0.14  | 9.10E-01 | 1.00E+00 | 0.91  | 4.19E-01 | 8.83E-01 |
| <b>TCEAL1</b>     | -0.04 | 8.26E-01 | 1.00E+00 | -0.26 | 4.19E-01 | 8.83E-01 |
| <b>AC087752.3</b> | -0.60 | 5.50E-01 | 1.00E+00 | 0.91  | 4.20E-01 | 8.83E-01 |
| <b>CAP2P1</b>     | 0.87  | 3.31E-01 | 1.00E+00 | -1.29 | 4.20E-01 | 8.83E-01 |
| <b>USO1</b>       | -0.02 | 9.44E-01 | 1.00E+00 | -0.12 | 4.20E-01 | 8.83E-01 |
| <b>ZCCHC12</b>    | -1.52 | 6.33E-01 | 1.00E+00 | 1.70  | 4.20E-01 | 8.83E-01 |
| <b>TP53INP2</b>   | -0.53 | 2.17E-01 | 1.00E+00 | 0.51  | 4.20E-01 | 8.83E-01 |
| <b>AL158829.1</b> | -1.23 | 7.24E-01 | 1.00E+00 | 1.37  | 4.20E-01 | 8.83E-01 |
| <b>YAF2</b>       | 0.18  | 3.93E-01 | 1.00E+00 | 0.19  | 4.20E-01 | 8.83E-01 |
| <b>TPD52</b>      | 0.12  | 6.04E-01 | 1.00E+00 | -0.42 | 4.20E-01 | 8.83E-01 |
| <b>AC097478.1</b> | 0.50  | 3.04E-01 | 1.00E+00 | 0.49  | 4.20E-01 | 8.83E-01 |

|             |       |          |          |       |          |          |
|-------------|-------|----------|----------|-------|----------|----------|
| ZDHHC13     | 0.17  | 6.42E-01 | 1.00E+00 | -0.33 | 4.20E-01 | 8.84E-01 |
| ZNF431      | 0.09  | 7.80E-01 | 1.00E+00 | -0.23 | 4.20E-01 | 8.84E-01 |
| ZNF513      | -0.45 | 7.10E-02 | 1.00E+00 | 0.48  | 4.20E-01 | 8.84E-01 |
| CD19        | -0.38 | 8.30E-01 | 1.00E+00 | 0.87  | 4.20E-01 | 8.84E-01 |
| KRT17P2     | -0.05 | 9.87E-01 | 1.00E+00 | 0.76  | 4.20E-01 | 8.84E-01 |
| G28649      | 0.50  | 4.38E-01 | 1.00E+00 | -0.53 | 4.20E-01 | 8.84E-01 |
| XLOC_004611 | 0.88  | 1.33E-01 | 1.00E+00 | 1.09  | 4.20E-01 | 8.84E-01 |
| AC104051.2  | 0.50  | 6.11E-01 | 1.00E+00 | 1.06  | 4.21E-01 | 8.84E-01 |
| SGSH        | -0.34 | 1.20E-01 | 1.00E+00 | 0.29  | 4.21E-01 | 8.84E-01 |
| DTYMK       | -0.05 | 8.18E-01 | 1.00E+00 | -0.20 | 4.21E-01 | 8.84E-01 |
| HSD17B4     | 0.01  | 9.65E-01 | 1.00E+00 | -0.14 | 4.21E-01 | 8.84E-01 |
| AC012291.2  | 0.16  | 9.14E-01 | 1.00E+00 | 0.60  | 4.21E-01 | 8.84E-01 |
| RPS24       | -0.09 | 7.76E-01 | 1.00E+00 | 0.21  | 4.21E-01 | 8.84E-01 |
| EXOSC2      | 0.09  | 6.74E-01 | 1.00E+00 | -0.13 | 4.21E-01 | 8.84E-01 |
| NUDT16P1    | -0.51 | 2.53E-01 | 1.00E+00 | -0.51 | 4.21E-01 | 8.84E-01 |
| AC025280.1  | 2.11  | 1.44E-01 | 1.00E+00 | 0.76  | 4.21E-01 | 8.84E-01 |
| UQCC2       | -0.26 | 3.85E-01 | 1.00E+00 | -0.30 | 4.21E-01 | 8.84E-01 |
| AC004585.1  | -3.16 | 1.48E-02 | 7.61E-01 | 0.97  | 4.21E-01 | 8.84E-01 |
| AC087203.2  | -1.53 | 4.05E-01 | 1.00E+00 | -1.81 | 4.21E-01 | 8.84E-01 |
| NBDY        | 0.00  | 9.95E-01 | 1.00E+00 | -0.32 | 4.21E-01 | 8.84E-01 |
| MEI1        | 0.57  | 5.03E-01 | 1.00E+00 | 0.50  | 4.21E-01 | 8.84E-01 |
| HDAC2       | 0.15  | 4.83E-01 | 1.00E+00 | -0.13 | 4.21E-01 | 8.84E-01 |
| TEX12       | -1.83 | 5.85E-01 | 1.00E+00 | 0.78  | 4.21E-01 | 8.84E-01 |
| SEC22C      | 0.44  | 1.48E-01 | 1.00E+00 | -0.19 | 4.21E-01 | 8.84E-01 |
| AC006547.1  | -0.15 | 7.44E-01 | 1.00E+00 | 0.68  | 4.21E-01 | 8.84E-01 |
| GRHPR       | -0.09 | 5.23E-01 | 1.00E+00 | -0.10 | 4.21E-01 | 8.84E-01 |
| WDR86       | 0.49  | 3.38E-01 | 1.00E+00 | 1.03  | 4.21E-01 | 8.84E-01 |
| CAMTA1-DT   | 0.23  | 7.46E-01 | 1.00E+00 | -0.81 | 4.21E-01 | 8.84E-01 |
| ACBD4       | 0.22  | 5.07E-01 | 1.00E+00 | -0.34 | 4.21E-01 | 8.84E-01 |
| PMS2P4      | 0.10  | 7.18E-01 | 1.00E+00 | 0.20  | 4.21E-01 | 8.84E-01 |
| AC005703.6  | 0.81  | 4.98E-01 | 1.00E+00 | 0.59  | 4.21E-01 | 8.84E-01 |
| SBSPON      | -0.29 | 5.83E-01 | 1.00E+00 | -0.39 | 4.21E-01 | 8.84E-01 |

|            |       |          |          |       |          |          |
|------------|-------|----------|----------|-------|----------|----------|
| ZNF385D    | 0.06  | 8.79E-01 | 1.00E+00 | 0.31  | 4.21E-01 | 8.84E-01 |
| G5553      | -0.02 | 9.90E-01 | 1.00E+00 | 0.85  | 4.21E-01 | 8.84E-01 |
| GATA5      | -5.16 | 1.09E-05 | 3.44E-03 | -1.59 | 4.21E-01 | 8.84E-01 |
| TMC3-AS1   | 0.84  | 5.57E-01 | 1.00E+00 | 0.68  | 4.21E-01 | 8.84E-01 |
| ZMYM1      | 0.17  | 6.22E-01 | 1.00E+00 | -0.23 | 4.21E-01 | 8.84E-01 |
| EDC3       | 0.00  | 9.97E-01 | 1.00E+00 | -0.18 | 4.22E-01 | 8.84E-01 |
| BIRC3      | 0.16  | 6.58E-01 | 1.00E+00 | 0.34  | 4.22E-01 | 8.84E-01 |
| MPHOSPH9   | -0.03 | 9.21E-01 | 1.00E+00 | -0.32 | 4.22E-01 | 8.84E-01 |
| SPIN2A     | 0.22  | 7.50E-01 | 1.00E+00 | 0.52  | 4.22E-01 | 8.84E-01 |
| NRXN1      | 0.06  | 9.05E-01 | 1.00E+00 | -0.50 | 4.22E-01 | 8.84E-01 |
| NUDT1      | -0.44 | 2.20E-02 | 8.96E-01 | 0.18  | 4.22E-01 | 8.84E-01 |
| FOCAD      | 0.05  | 8.18E-01 | 1.00E+00 | -0.17 | 4.22E-01 | 8.84E-01 |
| COMMD1     | -0.25 | 2.31E-01 | 1.00E+00 | -0.28 | 4.22E-01 | 8.84E-01 |
| TCOF1      | -0.35 | 8.82E-02 | 1.00E+00 | 0.45  | 4.22E-01 | 8.84E-01 |
| SV2C       | -1.03 | 1.19E-01 | 1.00E+00 | -0.66 | 4.22E-01 | 8.84E-01 |
| HES6       | -0.70 | 1.95E-01 | 1.00E+00 | -0.60 | 4.22E-01 | 8.84E-01 |
| ZNF585A    | 0.15  | 6.87E-01 | 1.00E+00 | 0.27  | 4.22E-01 | 8.84E-01 |
| RORA       | 0.14  | 7.93E-01 | 1.00E+00 | -0.41 | 4.22E-01 | 8.84E-01 |
| CRIP1      | 0.30  | 2.47E-01 | 1.00E+00 | -0.28 | 4.22E-01 | 8.84E-01 |
| HNRNPCP2   | -0.14 | 6.90E-01 | 1.00E+00 | -0.19 | 4.22E-01 | 8.84E-01 |
| BCL7B      | 0.08  | 7.46E-01 | 1.00E+00 | -0.35 | 4.22E-01 | 8.84E-01 |
| RND3       | -0.23 | 4.18E-01 | 1.00E+00 | 0.22  | 4.22E-01 | 8.84E-01 |
| AFF3       | 0.50  | 2.76E-01 | 1.00E+00 | -0.47 | 4.22E-01 | 8.84E-01 |
| NIPAL4     | -0.07 | 9.00E-01 | 1.00E+00 | 0.49  | 4.22E-01 | 8.84E-01 |
| PAM16      | 0.02  | 9.78E-01 | 1.00E+00 | 0.39  | 4.22E-01 | 8.84E-01 |
| AC130466.1 | 0.57  | 5.01E-01 | 1.00E+00 | -0.85 | 4.22E-01 | 8.84E-01 |
| MCM10      | -0.45 | 2.32E-01 | 1.00E+00 | 0.43  | 4.22E-01 | 8.84E-01 |
| TRIM31-AS1 | 0.23  | 8.66E-01 | 1.00E+00 | 0.64  | 4.22E-01 | 8.84E-01 |
| ANXA8L1    | -0.38 | 4.52E-01 | 1.00E+00 | 0.50  | 4.22E-01 | 8.84E-01 |
| AC092718.3 | -0.90 | 4.00E-01 | 1.00E+00 | 0.58  | 4.22E-01 | 8.84E-01 |
| MYRFL      | -0.27 | 6.91E-01 | 1.00E+00 | -0.52 | 4.22E-01 | 8.84E-01 |
| TEX10      | -0.09 | 6.70E-01 | 1.00E+00 | 0.18  | 4.22E-01 | 8.84E-01 |

|             |       |          |          |       |          |          |
|-------------|-------|----------|----------|-------|----------|----------|
| ARL4A       | 0.17  | 5.68E-01 | 1.00E+00 | -0.31 | 4.23E-01 | 8.84E-01 |
| PSCA        | -0.52 | 1.86E-01 | 1.00E+00 | 0.50  | 4.23E-01 | 8.84E-01 |
| ZNF460      | 0.07  | 8.50E-01 | 1.00E+00 | 0.42  | 4.23E-01 | 8.84E-01 |
| ANXA4       | 0.02  | 9.09E-01 | 1.00E+00 | -0.11 | 4.23E-01 | 8.84E-01 |
| XLOC_009167 | -2.82 | 2.79E-01 | 1.00E+00 | -1.04 | 4.23E-01 | 8.84E-01 |
| WDR18       | -0.32 | 3.20E-01 | 1.00E+00 | 0.21  | 4.23E-01 | 8.84E-01 |
| SLC7A1      | -0.04 | 9.02E-01 | 1.00E+00 | 0.33  | 4.23E-01 | 8.84E-01 |
| SOX2-OT     | -0.06 | 9.48E-01 | 1.00E+00 | -0.50 | 4.23E-01 | 8.84E-01 |
| S100A7      | -1.32 | 1.04E-01 | 1.00E+00 | 2.51  | 4.23E-01 | 8.84E-01 |
| AC243964.3  | -0.16 | 6.56E-01 | 1.00E+00 | 0.43  | 4.23E-01 | 8.84E-01 |
| ZNF71       | -0.02 | 9.13E-01 | 1.00E+00 | -0.31 | 4.23E-01 | 8.84E-01 |
| IL2RA       | 0.61  | 4.98E-01 | 1.00E+00 | 2.51  | 4.23E-01 | 8.84E-01 |
| AC034231.1  | -0.12 | 8.71E-01 | 1.00E+00 | 0.56  | 4.23E-01 | 8.84E-01 |
| ANKDD1A     | 0.55  | 2.03E-01 | 1.00E+00 | -0.41 | 4.23E-01 | 8.84E-01 |
| RBM47       | 0.11  | 7.38E-01 | 1.00E+00 | 0.21  | 4.23E-01 | 8.84E-01 |
| NUP85       | 0.01  | 9.79E-01 | 1.00E+00 | -0.15 | 4.23E-01 | 8.84E-01 |
| AC087672.2  | -0.69 | 7.32E-01 | 1.00E+00 | 0.69  | 4.23E-01 | 8.84E-01 |
| LRRC37A5P   | -0.10 | 9.23E-01 | 1.00E+00 | 0.46  | 4.23E-01 | 8.84E-01 |
| AL390719.1  | -0.74 | 3.88E-01 | 1.00E+00 | 0.46  | 4.23E-01 | 8.84E-01 |
| CLIC6       | 0.08  | 8.78E-01 | 1.00E+00 | 0.53  | 4.23E-01 | 8.84E-01 |
| RACGAP1     | -0.02 | 9.45E-01 | 1.00E+00 | -0.21 | 4.23E-01 | 8.84E-01 |
| HNRNPF      | -0.06 | 7.98E-01 | 1.00E+00 | 0.14  | 4.23E-01 | 8.84E-01 |
| C9orf40     | 0.38  | 3.20E-01 | 1.00E+00 | -0.47 | 4.24E-01 | 8.84E-01 |
| ZNF117      | 0.05  | 9.06E-01 | 1.00E+00 | -0.40 | 4.24E-01 | 8.84E-01 |
| GAS2L1      | -0.43 | 2.23E-01 | 1.00E+00 | -0.49 | 4.24E-01 | 8.84E-01 |
| ELF3        | -0.69 | 1.86E-01 | 1.00E+00 | 0.46  | 4.24E-01 | 8.84E-01 |
| BCOR        | -0.49 | 1.08E-01 | 1.00E+00 | 0.30  | 4.24E-01 | 8.84E-01 |
| RNVU1-20    | -1.51 | 5.84E-01 | 1.00E+00 | -0.65 | 4.24E-01 | 8.84E-01 |
| SIRT5       | -0.20 | 4.97E-01 | 1.00E+00 | 0.19  | 4.24E-01 | 8.84E-01 |
| AC009403.1  | 0.17  | 8.52E-01 | 1.00E+00 | -0.49 | 4.24E-01 | 8.84E-01 |
| SMIM10L2B   | 0.05  | 8.76E-01 | 1.00E+00 | -0.58 | 4.24E-01 | 8.84E-01 |
| NARS        | -0.11 | 5.33E-01 | 1.00E+00 | -0.13 | 4.24E-01 | 8.84E-01 |

|                    |       |          |          |       |          |          |
|--------------------|-------|----------|----------|-------|----------|----------|
| <b>TMEM128</b>     | 0.28  | 2.01E-01 | 1.00E+00 | -0.26 | 4.24E-01 | 8.85E-01 |
| <b>FOXJ3</b>       | 0.07  | 6.16E-01 | 1.00E+00 | -0.26 | 4.24E-01 | 8.85E-01 |
| <b>NACA</b>        | -0.11 | 6.78E-01 | 1.00E+00 | -0.19 | 4.24E-01 | 8.85E-01 |
| <b>ZDHHC20</b>     | -0.04 | 9.04E-01 | 1.00E+00 | 0.21  | 4.24E-01 | 8.85E-01 |
| <b>AL035071.2</b>  | -2.07 | 1.62E-01 | 1.00E+00 | -0.68 | 4.24E-01 | 8.85E-01 |
| <b>SLC9A8</b>      | -0.18 | 5.72E-01 | 1.00E+00 | 0.41  | 4.24E-01 | 8.85E-01 |
| <b>CLINT1</b>      | 0.18  | 4.81E-01 | 1.00E+00 | -0.11 | 4.24E-01 | 8.85E-01 |
| <b>NONO</b>        | -0.10 | 5.19E-01 | 1.00E+00 | 0.14  | 4.24E-01 | 8.85E-01 |
| <b>MCIDAS</b>      | -2.54 | 3.63E-01 | 1.00E+00 | -1.71 | 4.25E-01 | 8.85E-01 |
| <b>IFT172</b>      | -0.15 | 6.01E-01 | 1.00E+00 | -0.27 | 4.25E-01 | 8.85E-01 |
| <b>XRCC6</b>       | -0.11 | 4.66E-01 | 1.00E+00 | -0.06 | 4.25E-01 | 8.85E-01 |
| <b>EIF4B</b>       | 0.03  | 9.15E-01 | 1.00E+00 | 0.20  | 4.25E-01 | 8.85E-01 |
| <b>LINC01115</b>   | 0.65  | 8.12E-01 | 1.00E+00 | 0.72  | 4.25E-01 | 8.85E-01 |
| <b>RICTOR</b>      | 0.03  | 9.03E-01 | 1.00E+00 | 0.23  | 4.25E-01 | 8.85E-01 |
| <b>TBC1D12</b>     | 0.42  | 1.07E-01 | 1.00E+00 | -0.27 | 4.25E-01 | 8.85E-01 |
| <b>RBM15-AS1</b>   | -2.66 | 8.06E-02 | 1.00E+00 | -0.83 | 4.25E-01 | 8.85E-01 |
| <b>CES2</b>        | -0.21 | 2.48E-01 | 1.00E+00 | 0.16  | 4.25E-01 | 8.85E-01 |
| <b>AC110048.2</b>  | -0.93 | 5.92E-01 | 1.00E+00 | -1.12 | 4.25E-01 | 8.85E-01 |
| <b>CACNG4</b>      | 0.72  | 4.09E-01 | 1.00E+00 | 0.99  | 4.25E-01 | 8.85E-01 |
| <b>AC025048.4</b>  | 0.47  | 5.95E-01 | 1.00E+00 | 0.55  | 4.25E-01 | 8.85E-01 |
| <b>XLOC_005221</b> | -0.14 | 9.58E-01 | 1.00E+00 | 0.84  | 4.25E-01 | 8.85E-01 |
| <b>SHLD1</b>       | -0.02 | 9.51E-01 | 1.00E+00 | -0.15 | 4.25E-01 | 8.85E-01 |
| <b>XLOC_009415</b> | -1.08 | 4.34E-01 | 1.00E+00 | 0.91  | 4.25E-01 | 8.85E-01 |
| <b>RPL7P46</b>     | 1.49  | 6.65E-01 | 1.00E+00 | -0.87 | 4.25E-01 | 8.85E-01 |
| <b>LRR75A-AS1</b>  | -0.02 | 9.46E-01 | 1.00E+00 | 0.20  | 4.25E-01 | 8.85E-01 |
| <b>RPS15A</b>      | -0.14 | 6.45E-01 | 1.00E+00 | -0.34 | 4.25E-01 | 8.85E-01 |
| <b>MAP1LC3C</b>    | 1.50  | 4.34E-02 | 1.00E+00 | 0.72  | 4.25E-01 | 8.85E-01 |
| <b>EEF1A1P5</b>    | -0.02 | 9.47E-01 | 1.00E+00 | -0.17 | 4.25E-01 | 8.85E-01 |
| <b>B4GALNT1</b>    | -0.23 | 7.31E-01 | 1.00E+00 | 0.64  | 4.25E-01 | 8.85E-01 |
| <b>FGFBP3</b>      | -0.04 | 9.24E-01 | 1.00E+00 | -0.59 | 4.25E-01 | 8.85E-01 |
| <b>PDE4DIP</b>     | 0.09  | 6.91E-01 | 1.00E+00 | 0.20  | 4.25E-01 | 8.85E-01 |
| <b>ITSN1</b>       | 0.47  | 2.42E-01 | 1.00E+00 | -0.29 | 4.25E-01 | 8.85E-01 |

|                    |       |          |          |       |          |          |
|--------------------|-------|----------|----------|-------|----------|----------|
| <b>IQCB1</b>       | -0.02 | 9.25E-01 | 1.00E+00 | -0.20 | 4.25E-01 | 8.85E-01 |
| <b>MYH10</b>       | 0.06  | 8.56E-01 | 1.00E+00 | 0.31  | 4.25E-01 | 8.85E-01 |
| <b>CYP39A1</b>     | 0.38  | 3.76E-01 | 1.00E+00 | -0.49 | 4.25E-01 | 8.85E-01 |
| <b>RPH3A</b>       | -2.79 | 4.15E-01 | 1.00E+00 | 1.25  | 4.25E-01 | 8.85E-01 |
| <b>KIF1B</b>       | -0.03 | 8.96E-01 | 1.00E+00 | 0.25  | 4.25E-01 | 8.85E-01 |
| <b>NSMCE3</b>      | 0.00  | 9.99E-01 | 1.00E+00 | -0.46 | 4.25E-01 | 8.85E-01 |
| <b>FMO2</b>        | 1.07  | 1.29E-01 | 1.00E+00 | -0.58 | 4.25E-01 | 8.85E-01 |
| <b>TMEM267</b>     | 0.16  | 6.35E-01 | 1.00E+00 | -0.33 | 4.26E-01 | 8.85E-01 |
| <b>DDI2</b>        | 0.28  | 2.84E-01 | 1.00E+00 | 0.19  | 4.26E-01 | 8.85E-01 |
| <b>LIMD1</b>       | 0.14  | 6.19E-01 | 1.00E+00 | 0.46  | 4.26E-01 | 8.85E-01 |
| <b>AC080013.6</b>  | 1.63  | 4.49E-02 | 1.00E+00 | 0.45  | 4.26E-01 | 8.85E-01 |
| <b>AC016716.1</b>  | -0.23 | 9.47E-01 | 1.00E+00 | -0.62 | 4.26E-01 | 8.85E-01 |
| <b>AC016831.4</b>  | -1.10 | 7.50E-01 | 1.00E+00 | 0.65  | 4.26E-01 | 8.85E-01 |
| <b>NRIP2</b>       | 0.12  | 8.34E-01 | 1.00E+00 | 0.43  | 4.26E-01 | 8.85E-01 |
| <b>PLCB3</b>       | -0.39 | 8.91E-02 | 1.00E+00 | 0.47  | 4.26E-01 | 8.85E-01 |
| <b>ZNF622</b>      | -0.19 | 4.24E-01 | 1.00E+00 | 0.16  | 4.26E-01 | 8.85E-01 |
| <b>PAK4</b>        | -0.26 | 2.41E-01 | 1.00E+00 | 0.46  | 4.26E-01 | 8.85E-01 |
| <b>ABCF3</b>       | 0.01  | 9.44E-01 | 1.00E+00 | 0.12  | 4.26E-01 | 8.85E-01 |
| <b>TGFB2</b>       | -0.28 | 4.97E-01 | 1.00E+00 | 0.33  | 4.26E-01 | 8.85E-01 |
| <b>XLOC_008224</b> | -1.46 | 6.72E-01 | 1.00E+00 | -2.11 | 4.26E-01 | 8.85E-01 |
| <b>HOXA13</b>      | 0.60  | 1.81E-01 | 1.00E+00 | 0.67  | 4.26E-01 | 8.85E-01 |
| <b>MIRLET7A1</b>   | 0.86  | 8.04E-01 | 1.00E+00 | -0.82 | 4.26E-01 | 8.85E-01 |
| <b>LINC02062</b>   | 0.68  | 4.69E-01 | 1.00E+00 | -0.54 | 4.26E-01 | 8.85E-01 |
| <b>TMEM248</b>     | 0.14  | 3.98E-01 | 1.00E+00 | -0.33 | 4.26E-01 | 8.85E-01 |
| <b>PEX11B</b>      | 0.02  | 9.22E-01 | 1.00E+00 | -0.22 | 4.26E-01 | 8.85E-01 |
| <b>LINC01805</b>   | 0.24  | 6.68E-01 | 1.00E+00 | -0.58 | 4.27E-01 | 8.85E-01 |
| <b>XLOC_004198</b> | -1.33 | 2.20E-01 | 1.00E+00 | 1.25  | 4.27E-01 | 8.85E-01 |
| <b>GABRD</b>       | -1.37 | 4.35E-02 | 1.00E+00 | -0.47 | 4.27E-01 | 8.85E-01 |
| <b>AC090515.4</b>  | 0.78  | 6.47E-01 | 1.00E+00 | 0.73  | 4.27E-01 | 8.85E-01 |
| <b>MIR4530</b>     | -0.64 | 8.32E-01 | 1.00E+00 | 0.76  | 4.27E-01 | 8.85E-01 |
| <b>RNU6-722P</b>   | -2.80 | 3.95E-02 | 1.00E+00 | 0.45  | 4.27E-01 | 8.85E-01 |
| <b>NEK2</b>        | 0.45  | 2.85E-01 | 1.00E+00 | -0.46 | 4.27E-01 | 8.85E-01 |

|                   |       |          |          |       |          |          |
|-------------------|-------|----------|----------|-------|----------|----------|
| <b>AC011450.1</b> | -1.11 | 3.50E-01 | 1.00E+00 | 0.95  | 4.27E-01 | 8.85E-01 |
| <b>GAREM1</b>     | 0.12  | 6.53E-01 | 1.00E+00 | -0.27 | 4.27E-01 | 8.85E-01 |
| <b>FAM86KP</b>    | -2.26 | 3.51E-01 | 1.00E+00 | 0.88  | 4.27E-01 | 8.85E-01 |
| <b>SHQ1</b>       | 0.01  | 9.51E-01 | 1.00E+00 | -0.17 | 4.27E-01 | 8.85E-01 |
| <b>B3GALNT1</b>   | 0.55  | 2.53E-01 | 1.00E+00 | 0.20  | 4.27E-01 | 8.85E-01 |
| <b>PHETA2</b>     | -0.04 | 8.95E-01 | 1.00E+00 | 0.32  | 4.27E-01 | 8.85E-01 |
| <b>CHD8</b>       | -0.29 | 2.71E-01 | 1.00E+00 | 0.34  | 4.27E-01 | 8.85E-01 |
| <b>AP000753.1</b> | NA    | NA       | NA       | -0.81 | 4.27E-01 | 8.85E-01 |
| <b>TNKS</b>       | 0.31  | 2.40E-01 | 1.00E+00 | 0.26  | 4.27E-01 | 8.85E-01 |
| <b>ASPHD2</b>     | -0.50 | 4.86E-01 | 1.00E+00 | -0.44 | 4.27E-01 | 8.85E-01 |
| <b>ANKRD46</b>    | 0.58  | 8.27E-02 | 1.00E+00 | -0.23 | 4.27E-01 | 8.85E-01 |
| <b>NBEAP1</b>     | 1.53  | 4.70E-01 | 1.00E+00 | 0.97  | 4.27E-01 | 8.85E-01 |
| <b>GALNT18</b>    | -0.26 | 3.16E-01 | 1.00E+00 | 0.22  | 4.27E-01 | 8.85E-01 |
| <b>RAB43P1</b>    | -0.61 | 5.04E-01 | 1.00E+00 | 0.86  | 4.27E-01 | 8.85E-01 |
| <b>ARAF</b>       | -0.08 | 7.05E-01 | 1.00E+00 | 0.13  | 4.27E-01 | 8.85E-01 |
| <b>CNOT6L</b>     | 0.01  | 9.75E-01 | 1.00E+00 | 0.18  | 4.27E-01 | 8.85E-01 |
| <b>COX6B1</b>     | -0.17 | 2.41E-01 | 1.00E+00 | -0.17 | 4.27E-01 | 8.85E-01 |
| <b>AP3S2</b>      | 0.33  | 2.70E-01 | 1.00E+00 | -0.24 | 4.27E-01 | 8.85E-01 |
| <b>TRPC4</b>      | -0.73 | 6.72E-01 | 1.00E+00 | 0.78  | 4.28E-01 | 8.85E-01 |
| <b>NOTCH4</b>     | 0.53  | 3.93E-01 | 1.00E+00 | 0.46  | 4.28E-01 | 8.85E-01 |
| <b>CPEB2-DT</b>   | -0.08 | 9.51E-01 | 1.00E+00 | 0.52  | 4.28E-01 | 8.85E-01 |
| <b>AC092155.2</b> | -1.26 | 7.16E-01 | 1.00E+00 | -0.54 | 4.28E-01 | 8.85E-01 |
| <b>AC022182.1</b> | -1.13 | 5.51E-01 | 1.00E+00 | 0.85  | 4.28E-01 | 8.85E-01 |
| <b>DPY19L3</b>    | 0.29  | 4.94E-01 | 1.00E+00 | 0.36  | 4.28E-01 | 8.85E-01 |
| <b>ZNF33B</b>     | 0.05  | 8.70E-01 | 1.00E+00 | -0.22 | 4.28E-01 | 8.85E-01 |
| <b>RGPD6</b>      | 1.29  | 3.81E-01 | 1.00E+00 | 0.43  | 4.28E-01 | 8.85E-01 |
| <b>LINC00519</b>  | -0.50 | 7.34E-01 | 1.00E+00 | 0.48  | 4.28E-01 | 8.85E-01 |
| <b>ARMH1</b>      | -0.45 | 5.85E-01 | 1.00E+00 | 0.67  | 4.28E-01 | 8.85E-01 |
| <b>FDXR</b>       | -0.24 | 4.83E-01 | 1.00E+00 | 0.29  | 4.28E-01 | 8.85E-01 |
| <b>KLHL23</b>     | 0.30  | 4.76E-01 | 1.00E+00 | -0.34 | 4.28E-01 | 8.85E-01 |
| <b>LINC00847</b>  | 0.37  | 4.72E-01 | 1.00E+00 | 0.26  | 4.28E-01 | 8.85E-01 |
| <b>CXorf40A</b>   | -0.07 | 7.57E-01 | 1.00E+00 | 0.21  | 4.28E-01 | 8.85E-01 |

|             |       |          |          |       |          |          |
|-------------|-------|----------|----------|-------|----------|----------|
| LRG1        | -0.98 | 3.59E-02 | 1.00E+00 | -0.42 | 4.28E-01 | 8.85E-01 |
| FKBP8       | -0.02 | 9.23E-01 | 1.00E+00 | 0.48  | 4.28E-01 | 8.85E-01 |
| ZW10        | 0.19  | 5.52E-01 | 1.00E+00 | -0.20 | 4.28E-01 | 8.85E-01 |
| ZNF580      | 0.00  | 9.89E-01 | 1.00E+00 | -0.39 | 4.28E-01 | 8.85E-01 |
| CFL1        | -0.15 | 4.15E-01 | 1.00E+00 | -0.11 | 4.28E-01 | 8.85E-01 |
| BANP        | 0.12  | 5.44E-01 | 1.00E+00 | 0.25  | 4.28E-01 | 8.85E-01 |
| SMIM15      | 0.13  | 5.09E-01 | 1.00E+00 | -0.20 | 4.28E-01 | 8.85E-01 |
| AC069366.1  | 2.60  | 4.45E-01 | 1.00E+00 | -1.39 | 4.28E-01 | 8.85E-01 |
| AP004609.1  | -1.16 | 7.39E-01 | 1.00E+00 | 1.45  | 4.28E-01 | 8.85E-01 |
| TRIM16L     | 0.03  | 9.21E-01 | 1.00E+00 | -0.31 | 4.28E-01 | 8.85E-01 |
| CHRNB4      | -0.72 | 5.42E-01 | 1.00E+00 | 0.87  | 4.28E-01 | 8.85E-01 |
| WDFY2       | 0.09  | 8.13E-01 | 1.00E+00 | 0.25  | 4.28E-01 | 8.85E-01 |
| FAM78B      | -0.85 | 1.06E-01 | 1.00E+00 | 0.70  | 4.28E-01 | 8.85E-01 |
| RPP25L      | 0.14  | 5.94E-01 | 1.00E+00 | 0.17  | 4.28E-01 | 8.85E-01 |
| SLC8A1      | -0.19 | 6.88E-01 | 1.00E+00 | 0.34  | 4.28E-01 | 8.85E-01 |
| RTL8A       | -0.13 | 4.90E-01 | 1.00E+00 | -0.16 | 4.28E-01 | 8.85E-01 |
| NCAPG       | 0.39  | 2.32E-01 | 1.00E+00 | 0.42  | 4.28E-01 | 8.85E-01 |
| XLOC_007437 | 0.80  | 1.12E-01 | 1.00E+00 | -0.67 | 4.29E-01 | 8.85E-01 |
| BX470102.2  | -0.18 | 6.64E-01 | 1.00E+00 | -0.34 | 4.29E-01 | 8.85E-01 |
| TNNI1       | -0.59 | 2.81E-01 | 1.00E+00 | -0.59 | 4.29E-01 | 8.85E-01 |
| AP000688.2  | 0.72  | 5.69E-01 | 1.00E+00 | -0.78 | 4.29E-01 | 8.85E-01 |
| TMEM160     | -0.30 | 1.79E-01 | 1.00E+00 | -0.49 | 4.29E-01 | 8.85E-01 |
| WNT9B       | -0.58 | 6.25E-01 | 1.00E+00 | 0.82  | 4.29E-01 | 8.85E-01 |
| WARS2-IT1   | 1.91  | 4.63E-02 | 1.00E+00 | 0.99  | 4.29E-01 | 8.85E-01 |
| OSBPL5      | -0.04 | 8.61E-01 | 1.00E+00 | 0.39  | 4.29E-01 | 8.85E-01 |
| PRDX1P1     | 0.87  | 5.39E-01 | 1.00E+00 | -0.57 | 4.29E-01 | 8.85E-01 |
| ATM         | 0.15  | 6.82E-01 | 1.00E+00 | 0.31  | 4.29E-01 | 8.85E-01 |
| XLOC_007801 | 0.91  | 1.53E-01 | 1.00E+00 | -0.57 | 4.29E-01 | 8.85E-01 |
| RPS4X       | -0.22 | 5.06E-01 | 1.00E+00 | 0.22  | 4.29E-01 | 8.85E-01 |
| NAA38       | 0.04  | 8.63E-01 | 1.00E+00 | -0.24 | 4.29E-01 | 8.85E-01 |
| HSPB1P1     | -0.62 | 5.40E-01 | 1.00E+00 | -0.55 | 4.29E-01 | 8.85E-01 |
| AC010997.3  | 1.46  | 2.78E-01 | 1.00E+00 | -0.78 | 4.29E-01 | 8.85E-01 |



|             |       |          |          |       |          |          |
|-------------|-------|----------|----------|-------|----------|----------|
| LLPH-DT     | -0.39 | 5.81E-01 | 1.00E+00 | -0.82 | 4.29E-01 | 8.85E-01 |
| USP40       | 0.40  | 4.57E-02 | 1.00E+00 | 0.31  | 4.29E-01 | 8.85E-01 |
| AC009244.1  | 1.77  | 8.51E-03 | 5.68E-01 | -0.37 | 4.29E-01 | 8.85E-01 |
| AC000403.1  | -0.30 | 5.01E-01 | 1.00E+00 | 0.59  | 4.29E-01 | 8.85E-01 |
| CTDNEP1     | 0.01  | 9.78E-01 | 1.00E+00 | 0.23  | 4.29E-01 | 8.86E-01 |
| AC004967.1  | -0.43 | 3.44E-01 | 1.00E+00 | -0.36 | 4.29E-01 | 8.86E-01 |
| DDO         | 0.64  | 4.03E-01 | 1.00E+00 | 0.70  | 4.29E-01 | 8.86E-01 |
| EFCAB2      | 0.49  | 2.46E-01 | 1.00E+00 | -0.31 | 4.29E-01 | 8.86E-01 |
| RCVRN       | -0.05 | 9.54E-01 | 1.00E+00 | 0.91  | 4.29E-01 | 8.86E-01 |
| XLOC_004842 | -0.51 | 8.61E-01 | 1.00E+00 | 1.58  | 4.29E-01 | 8.86E-01 |
| AC024597.1  | -2.94 | 3.83E-01 | 1.00E+00 | 1.02  | 4.29E-01 | 8.86E-01 |
| MIR573      | 1.72  | 1.95E-01 | 1.00E+00 | 0.75  | 4.30E-01 | 8.86E-01 |
| LUC7L2      | 0.13  | 5.47E-01 | 1.00E+00 | -0.21 | 4.30E-01 | 8.86E-01 |
| AC012615.1  | -2.30 | 5.27E-02 | 1.00E+00 | -0.50 | 4.30E-01 | 8.86E-01 |
| CASP5       | 3.55  | 1.81E-01 | 1.00E+00 | 2.49  | 4.30E-01 | 8.86E-01 |
| DRAXIN      | -1.05 | 2.41E-01 | 1.00E+00 | 0.69  | 4.30E-01 | 8.86E-01 |
| TK2         | 0.86  | 5.02E-02 | 1.00E+00 | 0.35  | 4.30E-01 | 8.86E-01 |
| DPM1        | 0.20  | 4.64E-01 | 1.00E+00 | -0.17 | 4.30E-01 | 8.86E-01 |
| RASGEF1C    | 0.33  | 6.68E-01 | 1.00E+00 | -0.81 | 4.30E-01 | 8.86E-01 |
| COL22A1     | -1.41 | 1.24E-01 | 1.00E+00 | 2.48  | 4.30E-01 | 8.86E-01 |
| GABPB1-AS1  | 0.14  | 7.50E-01 | 1.00E+00 | -0.22 | 4.30E-01 | 8.86E-01 |
| GATD1       | -0.32 | 2.14E-01 | 1.00E+00 | 0.38  | 4.30E-01 | 8.86E-01 |
| AC008915.2  | -0.37 | 8.59E-01 | 1.00E+00 | -0.56 | 4.30E-01 | 8.86E-01 |
| AC008763.1  | -1.10 | 3.83E-01 | 1.00E+00 | -0.61 | 4.30E-01 | 8.86E-01 |
| COQ8A       | 0.21  | 2.82E-01 | 1.00E+00 | -0.32 | 4.30E-01 | 8.86E-01 |
| CCL28       | 0.20  | 6.30E-01 | 1.00E+00 | 0.34  | 4.30E-01 | 8.86E-01 |
| GTF3A       | 0.03  | 9.10E-01 | 1.00E+00 | -0.20 | 4.30E-01 | 8.86E-01 |
| RPS15AP12   | 1.32  | 4.06E-01 | 1.00E+00 | -0.45 | 4.30E-01 | 8.86E-01 |
| AC044860.1  | 0.15  | 8.64E-01 | 1.00E+00 | 1.04  | 4.30E-01 | 8.86E-01 |
| STXBP3      | 0.08  | 7.77E-01 | 1.00E+00 | -0.26 | 4.30E-01 | 8.86E-01 |
| MAN1A2      | -0.12 | 4.74E-01 | 1.00E+00 | -0.17 | 4.30E-01 | 8.86E-01 |
| PRDM11      | 0.08  | 7.00E-01 | 1.00E+00 | 0.53  | 4.30E-01 | 8.86E-01 |

|            |       |          |          |       |          |          |
|------------|-------|----------|----------|-------|----------|----------|
| PPP1R35    | 0.31  | 2.88E-01 | 1.00E+00 | -0.27 | 4.30E-01 | 8.86E-01 |
| OSBP       | 0.01  | 9.53E-01 | 1.00E+00 | -0.30 | 4.30E-01 | 8.86E-01 |
| MRM2       | 0.00  | 9.96E-01 | 1.00E+00 | -0.19 | 4.30E-01 | 8.86E-01 |
| AC117503.3 | -3.23 | 6.91E-02 | 1.00E+00 | -1.21 | 4.30E-01 | 8.86E-01 |
| YTHDF1     | -0.11 | 5.74E-01 | 1.00E+00 | -0.32 | 4.30E-01 | 8.86E-01 |
| SYTL3      | 0.18  | 7.43E-01 | 1.00E+00 | 0.22  | 4.30E-01 | 8.86E-01 |
| NMU        | 0.01  | 9.83E-01 | 1.00E+00 | -0.63 | 4.31E-01 | 8.86E-01 |
| HDC        | 0.60  | 3.95E-01 | 1.00E+00 | 0.70  | 4.31E-01 | 8.86E-01 |
| SEC16A     | -0.12 | 5.01E-01 | 1.00E+00 | 0.35  | 4.31E-01 | 8.86E-01 |
| TEAD3      | -0.14 | 6.77E-01 | 1.00E+00 | 0.39  | 4.31E-01 | 8.86E-01 |
| TSR2       | 0.25  | 1.88E-01 | 1.00E+00 | -0.17 | 4.31E-01 | 8.86E-01 |
| PCYOX1L    | -0.10 | 6.93E-01 | 1.00E+00 | 0.34  | 4.31E-01 | 8.86E-01 |
| CD300H     | 0.49  | 7.55E-01 | 1.00E+00 | 1.29  | 4.31E-01 | 8.86E-01 |
| ITGA6-AS1  | -3.31 | 1.29E-01 | 1.00E+00 | -0.94 | 4.31E-01 | 8.86E-01 |
| ZSCAN22    | -0.04 | 9.19E-01 | 1.00E+00 | -0.37 | 4.31E-01 | 8.86E-01 |
| UBE2MP1    | -0.18 | 9.35E-01 | 1.00E+00 | -0.43 | 4.31E-01 | 8.86E-01 |
| ZBP1       | -0.51 | 6.91E-01 | 1.00E+00 | 2.47  | 4.31E-01 | 8.86E-01 |
| ACAA2      | 1.37  | 1.40E-02 | 7.46E-01 | -0.33 | 4.31E-01 | 8.86E-01 |
| COMT       | -0.04 | 8.47E-01 | 1.00E+00 | 0.14  | 4.31E-01 | 8.86E-01 |
| SSX2IP     | -0.30 | 2.83E-01 | 1.00E+00 | -0.23 | 4.31E-01 | 8.86E-01 |
| SNRPN      | 1.14  | 3.18E-01 | 1.00E+00 | -0.54 | 4.31E-01 | 8.86E-01 |
| CCDC169    | -0.59 | 7.92E-01 | 1.00E+00 | -0.81 | 4.31E-01 | 8.86E-01 |
| RPIA       | 0.10  | 6.99E-01 | 1.00E+00 | -0.21 | 4.31E-01 | 8.86E-01 |
| CD9        | 0.30  | 9.87E-02 | 1.00E+00 | -0.23 | 4.31E-01 | 8.86E-01 |
| HEPACAM2   | -2.56 | 1.89E-01 | 1.00E+00 | -1.23 | 4.31E-01 | 8.86E-01 |
| AC073857.1 | -0.94 | 2.59E-01 | 1.00E+00 | 0.41  | 4.31E-01 | 8.86E-01 |
| RBM7       | 0.28  | 2.85E-01 | 1.00E+00 | -0.26 | 4.31E-01 | 8.86E-01 |
| NRK        | 0.85  | 4.67E-01 | 1.00E+00 | 0.98  | 4.32E-01 | 8.86E-01 |
| CCNQ       | -0.13 | 5.51E-01 | 1.00E+00 | -0.45 | 4.32E-01 | 8.86E-01 |
| LUZP2      | 0.37  | 7.20E-01 | 1.00E+00 | -0.58 | 4.32E-01 | 8.86E-01 |
| TREML2     | 0.49  | 7.44E-01 | 1.00E+00 | 1.44  | 4.32E-01 | 8.86E-01 |
| CCDC181    | -0.66 | 5.06E-01 | 1.00E+00 | -0.54 | 4.32E-01 | 8.86E-01 |

|             |       |          |          |       |          |          |
|-------------|-------|----------|----------|-------|----------|----------|
| SFMBT1      | -0.23 | 3.12E-01 | 1.00E+00 | -0.19 | 4.32E-01 | 8.86E-01 |
| AC019197.1  | 1.20  | 3.60E-01 | 1.00E+00 | -0.74 | 4.32E-01 | 8.86E-01 |
| SPATA24     | -0.04 | 8.91E-01 | 1.00E+00 | 0.29  | 4.32E-01 | 8.86E-01 |
| NUDT5       | -0.11 | 5.32E-01 | 1.00E+00 | -0.21 | 4.32E-01 | 8.86E-01 |
| HOXB8       | 0.01  | 9.90E-01 | 1.00E+00 | 0.66  | 4.32E-01 | 8.86E-01 |
| C3orf35     | 0.20  | 8.65E-01 | 1.00E+00 | -0.75 | 4.32E-01 | 8.86E-01 |
| MATN2       | -0.04 | 8.08E-01 | 1.00E+00 | -0.23 | 4.32E-01 | 8.86E-01 |
| LINC02511   | 3.40  | 2.31E-02 | 9.12E-01 | -0.81 | 4.32E-01 | 8.86E-01 |
| SEC24B      | 0.05  | 8.13E-01 | 1.00E+00 | -0.21 | 4.32E-01 | 8.86E-01 |
| LINC02593   | 0.21  | 8.41E-01 | 1.00E+00 | 1.04  | 4.32E-01 | 8.86E-01 |
| GLIS1       | -0.34 | 5.11E-01 | 1.00E+00 | 0.41  | 4.32E-01 | 8.86E-01 |
| NOX1        | 0.10  | 9.14E-01 | 1.00E+00 | -0.48 | 4.32E-01 | 8.86E-01 |
| ADH1C       | 1.79  | 1.78E-01 | 1.00E+00 | -0.86 | 4.32E-01 | 8.86E-01 |
| NXN         | -0.15 | 5.35E-01 | 1.00E+00 | 0.42  | 4.32E-01 | 8.86E-01 |
| MANBAL      | -0.11 | 5.36E-01 | 1.00E+00 | -0.14 | 4.32E-01 | 8.86E-01 |
| XLOC_005182 | -0.23 | 8.46E-01 | 1.00E+00 | 0.86  | 4.32E-01 | 8.86E-01 |
| ADGRD1      | 0.81  | 8.58E-02 | 1.00E+00 | 0.41  | 4.32E-01 | 8.86E-01 |
| WASHC5      | 0.05  | 7.66E-01 | 1.00E+00 | -0.15 | 4.32E-01 | 8.86E-01 |
| AP002812.3  | -1.89 | 5.83E-01 | 1.00E+00 | 0.82  | 4.32E-01 | 8.86E-01 |
| SLC30A7     | 0.17  | 5.75E-01 | 1.00E+00 | 0.21  | 4.32E-01 | 8.86E-01 |
| ZSCAN23     | 0.46  | 7.28E-01 | 1.00E+00 | 0.68  | 4.33E-01 | 8.86E-01 |
| ZNF142      | -0.38 | 4.05E-02 | 1.00E+00 | 0.49  | 4.33E-01 | 8.86E-01 |
| BCAS2       | -0.09 | 6.30E-01 | 1.00E+00 | -0.27 | 4.33E-01 | 8.86E-01 |
| GLIPR2      | 0.44  | 2.86E-01 | 1.00E+00 | 0.34  | 4.33E-01 | 8.86E-01 |
| HAUS8       | 0.30  | 2.10E-01 | 1.00E+00 | 0.20  | 4.33E-01 | 8.86E-01 |
| RAI2        | 0.55  | 1.90E-01 | 1.00E+00 | -0.38 | 4.33E-01 | 8.86E-01 |
| AC012640.2  | -0.42 | 2.31E-01 | 1.00E+00 | -0.20 | 4.33E-01 | 8.86E-01 |
| LINC01397   | -2.96 | 5.39E-02 | 1.00E+00 | 1.67  | 4.33E-01 | 8.86E-01 |
| CDK17       | -0.11 | 6.31E-01 | 1.00E+00 | -0.16 | 4.33E-01 | 8.86E-01 |
| CCL17       | 0.42  | 5.32E-01 | 1.00E+00 | 0.59  | 4.33E-01 | 8.86E-01 |
| AL445231.1  | -3.11 | 1.67E-02 | 8.13E-01 | 0.59  | 4.33E-01 | 8.86E-01 |
| TRBV10-2    | 0.56  | 8.71E-01 | 1.00E+00 | 1.18  | 4.33E-01 | 8.86E-01 |

|                   |       |          |          |       |          |          |
|-------------------|-------|----------|----------|-------|----------|----------|
| <b>DNAJB1</b>     | -0.44 | 1.88E-01 | 1.00E+00 | 0.18  | 4.33E-01 | 8.86E-01 |
| <b>TMEM186</b>    | 0.05  | 8.37E-01 | 1.00E+00 | -0.13 | 4.33E-01 | 8.86E-01 |
| <b>VDAC1P1</b>    | -0.69 | 7.91E-01 | 1.00E+00 | -0.42 | 4.33E-01 | 8.86E-01 |
| <b>AC092691.1</b> | 0.79  | 4.57E-01 | 1.00E+00 | 0.65  | 4.33E-01 | 8.86E-01 |
| <b>AL355512.1</b> | -1.97 | 1.87E-01 | 1.00E+00 | -0.74 | 4.33E-01 | 8.86E-01 |
| <b>EXTL1</b>      | 0.06  | 9.31E-01 | 1.00E+00 | -0.66 | 4.33E-01 | 8.86E-01 |
| <b>C3orf62</b>    | 0.36  | 1.21E-01 | 1.00E+00 | 0.23  | 4.33E-01 | 8.86E-01 |
| <b>LY86-AS1</b>   | -1.47 | 4.51E-01 | 1.00E+00 | -0.86 | 4.33E-01 | 8.86E-01 |
| <b>MRPS7</b>      | -0.18 | 2.07E-01 | 1.00E+00 | -0.16 | 4.33E-01 | 8.86E-01 |
| <b>MIR181A2HG</b> | 0.09  | 8.92E-01 | 1.00E+00 | -0.56 | 4.33E-01 | 8.86E-01 |
| <b>MYO7A</b>      | -0.22 | 7.41E-01 | 1.00E+00 | 0.74  | 4.33E-01 | 8.87E-01 |
| <b>MOB2</b>       | -0.22 | 3.09E-01 | 1.00E+00 | -0.33 | 4.34E-01 | 8.87E-01 |
| <b>ATP5PO</b>     | 0.17  | 5.55E-01 | 1.00E+00 | -0.47 | 4.34E-01 | 8.87E-01 |
| <b>RNF217-AS1</b> | -2.71 | 2.36E-02 | 9.15E-01 | -0.50 | 4.34E-01 | 8.87E-01 |
| <b>LYL1</b>       | 0.13  | 7.94E-01 | 1.00E+00 | 0.88  | 4.34E-01 | 8.87E-01 |
| <b>PRO1804</b>    | 1.35  | 6.84E-01 | 1.00E+00 | -1.04 | 4.34E-01 | 8.87E-01 |
| <b>STK32C</b>     | -0.34 | 1.30E-01 | 1.00E+00 | 0.28  | 4.34E-01 | 8.87E-01 |
| <b>NGDN</b>       | -0.06 | 7.42E-01 | 1.00E+00 | -0.22 | 4.34E-01 | 8.87E-01 |
| <b>AC244093.2</b> | NA    | NA       | NA       | 1.22  | 4.34E-01 | 8.87E-01 |
| <b>KLF9</b>       | -0.24 | 6.71E-01 | 1.00E+00 | 0.39  | 4.34E-01 | 8.87E-01 |
| <b>UGT3A2</b>     | 0.68  | 3.19E-01 | 1.00E+00 | -0.75 | 4.34E-01 | 8.87E-01 |
| <b>AKAP12</b>     | 0.40  | 3.92E-01 | 1.00E+00 | 0.37  | 4.34E-01 | 8.87E-01 |
| <b>BBS5</b>       | 0.23  | 3.84E-01 | 1.00E+00 | 0.64  | 4.34E-01 | 8.87E-01 |
| <b>NMNAT2</b>     | 0.05  | 9.33E-01 | 1.00E+00 | 0.37  | 4.34E-01 | 8.87E-01 |
| <b>HPF1</b>       | 0.06  | 7.65E-01 | 1.00E+00 | -0.27 | 4.34E-01 | 8.87E-01 |
| <b>TBXA2R</b>     | -0.35 | 5.44E-01 | 1.00E+00 | 0.54  | 4.34E-01 | 8.87E-01 |
| <b>FASTKD5</b>    | -0.29 | 1.45E-01 | 1.00E+00 | 0.11  | 4.34E-01 | 8.87E-01 |
| <b>CDCA8</b>      | -0.01 | 9.83E-01 | 1.00E+00 | 0.30  | 4.34E-01 | 8.87E-01 |
| <b>AC245014.3</b> | -0.47 | 8.12E-01 | 1.00E+00 | -0.81 | 4.34E-01 | 8.87E-01 |
| <b>CROCC2</b>     | -0.64 | 5.58E-01 | 1.00E+00 | 1.32  | 4.34E-01 | 8.87E-01 |
| <b>SPATC1</b>     | -2.65 | 2.56E-01 | 1.00E+00 | 1.67  | 4.34E-01 | 8.87E-01 |
| <b>ZRANB2-AS2</b> | 0.21  | 7.71E-01 | 1.00E+00 | 0.47  | 4.35E-01 | 8.87E-01 |

|             |       |          |          |       |          |          |
|-------------|-------|----------|----------|-------|----------|----------|
| CCDC47      | -0.13 | 5.16E-01 | 1.00E+00 | -0.17 | 4.35E-01 | 8.87E-01 |
| AC034236.2  | 0.33  | 5.26E-01 | 1.00E+00 | -0.38 | 4.35E-01 | 8.87E-01 |
| FAM200A     | 0.26  | 3.82E-01 | 1.00E+00 | 0.29  | 4.35E-01 | 8.87E-01 |
| STRADA      | 0.72  | 4.23E-01 | 1.00E+00 | 0.32  | 4.35E-01 | 8.87E-01 |
| XLOC_010829 | -0.02 | 9.86E-01 | 1.00E+00 | 0.80  | 4.35E-01 | 8.87E-01 |
| IAH1        | 0.05  | 8.17E-01 | 1.00E+00 | -0.17 | 4.35E-01 | 8.87E-01 |
| UTP6        | 0.09  | 6.71E-01 | 1.00E+00 | 0.15  | 4.35E-01 | 8.87E-01 |
| AP005131.6  | -0.67 | 6.42E-01 | 1.00E+00 | -0.91 | 4.35E-01 | 8.87E-01 |
| AL162578.1  | -0.25 | 9.42E-01 | 1.00E+00 | 0.74  | 4.35E-01 | 8.88E-01 |
| AC097493.4  | 1.08  | 2.20E-01 | 1.00E+00 | 0.68  | 4.35E-01 | 8.88E-01 |
| FANCF       | -0.09 | 7.37E-01 | 1.00E+00 | -0.23 | 4.35E-01 | 8.88E-01 |
| SELENOK     | 0.10  | 5.67E-01 | 1.00E+00 | -0.26 | 4.35E-01 | 8.88E-01 |
| ZNF236-DT   | -0.49 | 3.52E-01 | 1.00E+00 | 0.70  | 4.35E-01 | 8.88E-01 |
| POLR2G      | -0.18 | 2.81E-01 | 1.00E+00 | -0.20 | 4.35E-01 | 8.88E-01 |
| FLJ45513    | -0.42 | 7.70E-01 | 1.00E+00 | -1.05 | 4.35E-01 | 8.88E-01 |
| ASH2L       | 0.02  | 8.93E-01 | 1.00E+00 | 0.16  | 4.35E-01 | 8.88E-01 |
| AL442663.4  | -1.50 | 4.04E-01 | 1.00E+00 | -0.75 | 4.35E-01 | 8.88E-01 |
| POMZP3      | -0.06 | 9.02E-01 | 1.00E+00 | -0.41 | 4.35E-01 | 8.88E-01 |
| ATP6V1FNB   | -0.06 | 8.93E-01 | 1.00E+00 | 0.54  | 4.36E-01 | 8.88E-01 |
| AC006330.1  | 4.27  | 7.40E-02 | 1.00E+00 | -1.10 | 4.36E-01 | 8.88E-01 |
| SGMS1-AS1   | 0.13  | 7.46E-01 | 1.00E+00 | 0.36  | 4.36E-01 | 8.88E-01 |
| SNAI1       | 0.31  | 2.85E-01 | 1.00E+00 | 1.73  | 4.36E-01 | 8.88E-01 |
| AC096751.1  | -0.29 | 8.37E-01 | 1.00E+00 | -0.69 | 4.36E-01 | 8.88E-01 |
| BRK1        | 0.07  | 6.31E-01 | 1.00E+00 | -0.15 | 4.36E-01 | 8.88E-01 |
| STOX2       | -0.52 | 3.21E-02 | 1.00E+00 | -0.23 | 4.36E-01 | 8.88E-01 |
| AC092809.4  | 0.48  | 3.75E-01 | 1.00E+00 | -0.67 | 4.36E-01 | 8.88E-01 |
| FKBP9P1     | -0.16 | 7.72E-01 | 1.00E+00 | 0.29  | 4.36E-01 | 8.88E-01 |
| P2RY12      | 0.96  | 1.78E-01 | 1.00E+00 | -0.63 | 4.36E-01 | 8.88E-01 |
| ST6GALNAC2  | -0.09 | 7.48E-01 | 1.00E+00 | 0.29  | 4.36E-01 | 8.88E-01 |
| GNA12       | 0.11  | 7.56E-01 | 1.00E+00 | 0.44  | 4.36E-01 | 8.88E-01 |
| MAT2B       | 0.23  | 2.98E-01 | 1.00E+00 | -0.18 | 4.36E-01 | 8.88E-01 |
| LRR1        | 0.10  | 7.38E-01 | 1.00E+00 | -0.30 | 4.36E-01 | 8.89E-01 |

|                    |       |          |          |       |          |          |
|--------------------|-------|----------|----------|-------|----------|----------|
| <b>AC139149.1</b>  | -1.90 | 4.14E-02 | 1.00E+00 | 0.96  | 4.36E-01 | 8.89E-01 |
| <b>THOC2</b>       | 0.14  | 4.94E-01 | 1.00E+00 | 0.09  | 4.36E-01 | 8.89E-01 |
| <b>AC007541.1</b>  | 0.88  | 1.34E-01 | 1.00E+00 | -0.58 | 4.36E-01 | 8.89E-01 |
| <b>BECN1</b>       | -0.03 | 8.32E-01 | 1.00E+00 | -0.15 | 4.36E-01 | 8.89E-01 |
| <b>PRB3</b>        | -1.07 | 2.32E-01 | 1.00E+00 | -0.66 | 4.36E-01 | 8.89E-01 |
| <b>CYP2W1</b>      | -0.23 | 6.71E-01 | 1.00E+00 | -0.71 | 4.37E-01 | 8.89E-01 |
| <b>ANXA5</b>       | 0.26  | 5.31E-01 | 1.00E+00 | -0.28 | 4.37E-01 | 8.89E-01 |
| <b>MAP3K1</b>      | -0.13 | 6.73E-01 | 1.00E+00 | -0.27 | 4.37E-01 | 8.89E-01 |
| <b>ZNF326</b>      | -0.39 | 9.27E-02 | 1.00E+00 | -0.16 | 4.37E-01 | 8.89E-01 |
| <b>BAZZA</b>       | -0.31 | 1.92E-01 | 1.00E+00 | 0.41  | 4.37E-01 | 8.89E-01 |
| <b>AC068580.4</b>  | -0.53 | 7.40E-01 | 1.00E+00 | 1.35  | 4.37E-01 | 8.89E-01 |
| <b>G39837</b>      | 0.77  | 4.77E-01 | 1.00E+00 | 1.07  | 4.37E-01 | 8.89E-01 |
| <b>LEFTY2</b>      | -0.52 | 6.56E-01 | 1.00E+00 | -0.80 | 4.37E-01 | 8.89E-01 |
| <b>NORAD</b>       | 0.10  | 5.42E-01 | 1.00E+00 | 0.30  | 4.37E-01 | 8.89E-01 |
| <b>MLH1</b>        | -0.21 | 1.17E-01 | 1.00E+00 | 0.13  | 4.37E-01 | 8.89E-01 |
| <b>ZBED5-AS1</b>   | -0.12 | 6.72E-01 | 1.00E+00 | -0.40 | 4.37E-01 | 8.89E-01 |
| <b>LGALS7</b>      | 2.86  | 3.68E-01 | 1.00E+00 | 2.43  | 4.37E-01 | 8.89E-01 |
| <b>PPP1R2B</b>     | -1.71 | 1.89E-01 | 1.00E+00 | -0.34 | 4.37E-01 | 8.89E-01 |
| <b>XLOC_005050</b> | 0.95  | 1.39E-01 | 1.00E+00 | -0.71 | 4.37E-01 | 8.89E-01 |
| <b>NRG2</b>        | -0.32 | 3.61E-01 | 1.00E+00 | -0.52 | 4.37E-01 | 8.89E-01 |
| <b>LRFN4</b>       | -0.27 | 3.96E-01 | 1.00E+00 | 0.59  | 4.37E-01 | 8.89E-01 |
| <b>LRRK1</b>       | -0.25 | 2.68E-01 | 1.00E+00 | 0.35  | 4.37E-01 | 8.89E-01 |
| <b>ANKRD20A1</b>   | 0.29  | 8.44E-01 | 1.00E+00 | 0.63  | 4.37E-01 | 8.89E-01 |
| <b>AL021707.2</b>  | 0.17  | 7.65E-01 | 1.00E+00 | 0.39  | 4.37E-01 | 8.89E-01 |
| <b>ZNF846</b>      | -0.42 | 1.26E-01 | 1.00E+00 | -0.30 | 4.37E-01 | 8.89E-01 |
| <b>MIB1</b>        | 0.17  | 4.38E-01 | 1.00E+00 | 0.24  | 4.37E-01 | 8.89E-01 |
| <b>HLCS</b>        | 0.05  | 8.81E-01 | 1.00E+00 | -0.22 | 4.38E-01 | 8.89E-01 |
| <b>CARD19</b>      | -0.21 | 2.77E-01 | 1.00E+00 | -0.18 | 4.38E-01 | 8.89E-01 |
| <b>PPP3CB</b>      | -0.05 | 8.10E-01 | 1.00E+00 | 0.26  | 4.38E-01 | 8.89E-01 |
| <b>CLASRP</b>      | -0.30 | 3.13E-01 | 1.00E+00 | 0.41  | 4.38E-01 | 8.89E-01 |
| <b>ZNF641</b>      | 0.11  | 7.23E-01 | 1.00E+00 | 0.34  | 4.38E-01 | 8.89E-01 |
| <b>YWHAEP7</b>     | -0.50 | 8.83E-01 | 1.00E+00 | -0.69 | 4.38E-01 | 8.89E-01 |

|             |       |          |          |       |          |          |
|-------------|-------|----------|----------|-------|----------|----------|
| PAK1        | -0.18 | 4.06E-01 | 1.00E+00 | 0.18  | 4.38E-01 | 8.89E-01 |
| EGFL7       | -0.32 | 3.86E-01 | 1.00E+00 | 0.38  | 4.38E-01 | 8.89E-01 |
| KBTBD13     | 0.30  | 7.44E-01 | 1.00E+00 | -1.06 | 4.38E-01 | 8.89E-01 |
| PLK4        | -0.21 | 3.57E-01 | 1.00E+00 | -0.28 | 4.38E-01 | 8.89E-01 |
| AC091849.1  | -0.74 | 3.72E-01 | 1.00E+00 | 0.70  | 4.38E-01 | 8.89E-01 |
| SMARCAL1    | -0.04 | 8.42E-01 | 1.00E+00 | 0.17  | 4.38E-01 | 8.89E-01 |
| CACNA2D1    | 0.44  | 2.34E-01 | 1.00E+00 | -0.38 | 4.38E-01 | 8.89E-01 |
| HMGN2P41    | 0.25  | 7.27E-01 | 1.00E+00 | -0.37 | 4.38E-01 | 8.89E-01 |
| ATP13A2     | -0.08 | 7.00E-01 | 1.00E+00 | 0.43  | 4.38E-01 | 8.89E-01 |
| AC010632.2  | 0.00  | 9.99E-01 | 1.00E+00 | 1.01  | 4.38E-01 | 8.89E-01 |
| PKHD1L1     | 0.62  | 3.41E-01 | 1.00E+00 | 0.68  | 4.38E-01 | 8.89E-01 |
| SLC30A3     | -1.82 | 1.33E-01 | 1.00E+00 | -0.84 | 4.38E-01 | 8.89E-01 |
| AC006942.1  | NA    | NA       | NA       | -0.90 | 4.38E-01 | 8.89E-01 |
| SMG8        | 0.15  | 4.33E-01 | 1.00E+00 | 0.16  | 4.38E-01 | 8.89E-01 |
| XLOC_009994 | 0.16  | 9.07E-01 | 1.00E+00 | 0.84  | 4.39E-01 | 8.89E-01 |
| AC138627.1  | 2.10  | 4.02E-01 | 1.00E+00 | 1.09  | 4.39E-01 | 8.89E-01 |
| DKK1        | 0.94  | 1.64E-01 | 1.00E+00 | 1.41  | 4.39E-01 | 8.89E-01 |
| APOC1P1     | -0.08 | 9.82E-01 | 1.00E+00 | 0.83  | 4.39E-01 | 8.89E-01 |
| NUP50-DT    | -0.28 | 4.57E-01 | 1.00E+00 | 0.19  | 4.39E-01 | 8.89E-01 |
| ARL8A       | 0.03  | 8.95E-01 | 1.00E+00 | 0.40  | 4.39E-01 | 8.89E-01 |
| AC010754.1  | 1.16  | 4.37E-01 | 1.00E+00 | 1.10  | 4.39E-01 | 8.89E-01 |
| TVP23C      | -0.03 | 9.37E-01 | 1.00E+00 | -0.21 | 4.39E-01 | 8.89E-01 |
| NXT1        | -0.19 | 4.65E-01 | 1.00E+00 | 0.21  | 4.39E-01 | 8.89E-01 |
| DNAJC18     | 0.24  | 6.12E-01 | 1.00E+00 | 0.47  | 4.39E-01 | 8.89E-01 |
| AL008635.1  | -1.19 | 7.29E-01 | 1.00E+00 | 0.74  | 4.39E-01 | 8.89E-01 |
| OPLAH       | -0.05 | 9.01E-01 | 1.00E+00 | -0.58 | 4.39E-01 | 8.89E-01 |
| CDC27       | -0.03 | 8.29E-01 | 1.00E+00 | 0.14  | 4.39E-01 | 8.89E-01 |
| ENTPD5      | 0.05  | 8.49E-01 | 1.00E+00 | 0.15  | 4.39E-01 | 8.89E-01 |
| FAM205C     | -0.85 | 5.27E-01 | 1.00E+00 | 0.81  | 4.39E-01 | 8.89E-01 |
| AC124248.1  | -0.53 | 6.63E-01 | 1.00E+00 | 0.43  | 4.39E-01 | 8.89E-01 |
| MARK2P9     | 3.27  | 6.68E-02 | 1.00E+00 | -0.78 | 4.39E-01 | 8.89E-01 |
| ADAMTSL3    | 0.64  | 6.99E-02 | 1.00E+00 | -0.28 | 4.39E-01 | 8.89E-01 |

|             |       |          |          |       |          |          |
|-------------|-------|----------|----------|-------|----------|----------|
| GSPT2       | 0.17  | 6.81E-01 | 1.00E+00 | -0.27 | 4.39E-01 | 8.89E-01 |
| RPL36       | -0.18 | 5.00E-01 | 1.00E+00 | 0.26  | 4.39E-01 | 8.89E-01 |
| SYS1        | 0.32  | 1.32E-01 | 1.00E+00 | 0.15  | 4.39E-01 | 8.90E-01 |
| AL109918.1  | -0.05 | 9.31E-01 | 1.00E+00 | 0.58  | 4.39E-01 | 8.90E-01 |
| SLCO4A1     | 0.02  | 9.54E-01 | 1.00E+00 | 0.24  | 4.39E-01 | 8.90E-01 |
| PODXL2      | -0.69 | 3.07E-02 | 1.00E+00 | -0.59 | 4.39E-01 | 8.90E-01 |
| NPC1L1      | 0.90  | 5.77E-01 | 1.00E+00 | 1.27  | 4.40E-01 | 8.90E-01 |
| DYNLT3      | -0.09 | 7.09E-01 | 1.00E+00 | -0.25 | 4.40E-01 | 8.90E-01 |
| FDCSP       | -1.70 | 6.21E-01 | 1.00E+00 | 1.24  | 4.40E-01 | 8.90E-01 |
| IGSF9       | -0.42 | 1.91E-01 | 1.00E+00 | -0.50 | 4.40E-01 | 8.90E-01 |
| AC079228.1  | 0.47  | 8.34E-01 | 1.00E+00 | -0.47 | 4.40E-01 | 8.90E-01 |
| XLOC_013347 | -0.64 | 3.56E-01 | 1.00E+00 | 0.58  | 4.40E-01 | 8.90E-01 |
| SYCP1       | -0.19 | 8.94E-01 | 1.00E+00 | -0.99 | 4.40E-01 | 8.90E-01 |
| KLK4        | -1.05 | 3.30E-01 | 1.00E+00 | 0.88  | 4.40E-01 | 8.90E-01 |
| AC120036.4  | 1.23  | 1.48E-01 | 1.00E+00 | -0.78 | 4.40E-01 | 8.90E-01 |
| AC003965.1  | -0.86 | 8.02E-01 | 1.00E+00 | -1.31 | 4.40E-01 | 8.90E-01 |
| G39803      | 0.67  | 8.05E-01 | 1.00E+00 | -0.58 | 4.40E-01 | 8.90E-01 |
| AFG3L2      | -0.11 | 6.07E-01 | 1.00E+00 | -0.21 | 4.40E-01 | 8.90E-01 |
| BCL9        | -0.29 | 2.20E-01 | 1.00E+00 | 0.38  | 4.40E-01 | 8.90E-01 |
| N4BP1       | -0.07 | 8.01E-01 | 1.00E+00 | 0.33  | 4.40E-01 | 8.90E-01 |
| BPNT1       | -0.17 | 3.88E-01 | 1.00E+00 | 0.17  | 4.40E-01 | 8.90E-01 |
| SGSM1       | 0.16  | 6.47E-01 | 1.00E+00 | -0.39 | 4.40E-01 | 8.90E-01 |
| ZNF341      | 0.15  | 6.70E-01 | 1.00E+00 | 0.33  | 4.40E-01 | 8.90E-01 |
| EPCAM       | 0.38  | 4.93E-01 | 1.00E+00 | -0.39 | 4.40E-01 | 8.90E-01 |
| CCT7P1      | 0.55  | 6.57E-01 | 1.00E+00 | 1.15  | 4.40E-01 | 8.90E-01 |
| KLHDC1      | -0.23 | 6.04E-01 | 1.00E+00 | -0.28 | 4.40E-01 | 8.90E-01 |
| LRP5        | 0.05  | 8.71E-01 | 1.00E+00 | 0.43  | 4.40E-01 | 8.90E-01 |
| AL391825.1  | 0.47  | 8.93E-01 | 1.00E+00 | -1.32 | 4.40E-01 | 8.90E-01 |
| PDCD6IP     | -0.21 | 3.17E-01 | 1.00E+00 | -0.15 | 4.40E-01 | 8.90E-01 |
| AC016769.1  | -1.05 | 3.21E-01 | 1.00E+00 | 1.03  | 4.40E-01 | 8.90E-01 |
| AC107075.1  | 0.30  | 7.99E-01 | 1.00E+00 | -0.47 | 4.40E-01 | 8.90E-01 |
| STK35       | 0.07  | 7.51E-01 | 1.00E+00 | 0.28  | 4.40E-01 | 8.90E-01 |



|              |       |          |          |       |          |          |
|--------------|-------|----------|----------|-------|----------|----------|
| TEX41        | -0.17 | 6.73E-01 | 1.00E+00 | 0.31  | 4.40E-01 | 8.90E-01 |
| AC026748.1   | -1.19 | 2.55E-01 | 1.00E+00 | 1.06  | 4.40E-01 | 8.90E-01 |
| COPB1        | 0.24  | 1.05E-01 | 1.00E+00 | -0.13 | 4.40E-01 | 8.90E-01 |
| G39721       | -2.31 | 4.62E-02 | 1.00E+00 | 0.87  | 4.40E-01 | 8.90E-01 |
| EIF1AD       | -0.09 | 7.02E-01 | 1.00E+00 | 0.16  | 4.40E-01 | 8.90E-01 |
| AC130650.2   | -0.47 | 7.06E-01 | 1.00E+00 | -0.64 | 4.41E-01 | 8.90E-01 |
| ST13         | 0.06  | 7.72E-01 | 1.00E+00 | -0.10 | 4.41E-01 | 8.90E-01 |
| XLOC_002900  | -0.71 | 7.14E-01 | 1.00E+00 | -0.90 | 4.41E-01 | 8.90E-01 |
| VMP1         | 0.23  | 1.49E-01 | 1.00E+00 | -0.21 | 4.41E-01 | 8.90E-01 |
| G14419       | -0.74 | 4.63E-01 | 1.00E+00 | -0.60 | 4.41E-01 | 8.90E-01 |
| POPDC2       | -0.49 | 4.33E-01 | 1.00E+00 | 0.43  | 4.41E-01 | 8.90E-01 |
| KRT14        | -0.30 | 3.26E-01 | 1.00E+00 | 0.41  | 4.41E-01 | 8.90E-01 |
| CTC-338M12.4 | 0.05  | 9.44E-01 | 1.00E+00 | -0.30 | 4.41E-01 | 8.90E-01 |
| NEK6         | 0.21  | 6.10E-01 | 1.00E+00 | 0.38  | 4.41E-01 | 8.90E-01 |
| DBH          | -2.89 | 3.82E-02 | 1.00E+00 | 1.23  | 4.41E-01 | 8.90E-01 |
| TMEM141      | 0.26  | 2.76E-01 | 1.00E+00 | -0.23 | 4.41E-01 | 8.90E-01 |
| FAM151B      | 0.06  | 9.28E-01 | 1.00E+00 | -0.40 | 4.41E-01 | 8.90E-01 |
| PPP1R12A-AS1 | 0.47  | 3.11E-01 | 1.00E+00 | -0.43 | 4.41E-01 | 8.90E-01 |
| DPYD         | 0.18  | 4.78E-01 | 1.00E+00 | 0.31  | 4.41E-01 | 8.90E-01 |
| SERF2        | 0.12  | 5.43E-01 | 1.00E+00 | -0.40 | 4.41E-01 | 8.90E-01 |
| AC139256.1   | -1.24 | 5.67E-01 | 1.00E+00 | 0.93  | 4.41E-01 | 8.90E-01 |
| DLG3-AS1     | -1.71 | 5.44E-01 | 1.00E+00 | -0.65 | 4.41E-01 | 8.90E-01 |
| G3BP1        | 0.25  | 2.13E-01 | 1.00E+00 | -0.13 | 4.41E-01 | 8.90E-01 |
| CDK15        | 0.61  | 3.00E-01 | 1.00E+00 | 0.53  | 4.41E-01 | 8.90E-01 |
| LRRC58       | 0.07  | 7.06E-01 | 1.00E+00 | -0.13 | 4.41E-01 | 8.90E-01 |
| NOL3         | -0.03 | 9.42E-01 | 1.00E+00 | -0.25 | 4.41E-01 | 8.90E-01 |
| EHMT1        | -0.14 | 5.19E-01 | 1.00E+00 | 0.28  | 4.41E-01 | 8.90E-01 |
| IL9          | NA    | NA       | NA       | 2.07  | 4.41E-01 | 8.90E-01 |
| XRCC4        | 0.11  | 7.53E-01 | 1.00E+00 | -0.25 | 4.41E-01 | 8.90E-01 |
| ZNF765       | 0.10  | 7.57E-01 | 1.00E+00 | -0.20 | 4.42E-01 | 8.90E-01 |
| XLOC_006495  | 0.20  | 9.20E-01 | 1.00E+00 | 0.95  | 4.42E-01 | 8.90E-01 |
| SLAMF1       | 0.45  | 5.57E-01 | 1.00E+00 | 2.41  | 4.42E-01 | 8.90E-01 |

|                    |       |          |          |       |          |          |
|--------------------|-------|----------|----------|-------|----------|----------|
| <b>XLOC_013263</b> | -2.90 | 8.34E-03 | 5.64E-01 | -0.63 | 4.42E-01 | 8.90E-01 |
| <b>LGALS8-AS1</b>  | -2.97 | 2.92E-01 | 1.00E+00 | -1.05 | 4.42E-01 | 8.90E-01 |
| <b>IBTK</b>        | 0.20  | 4.83E-01 | 1.00E+00 | 0.23  | 4.42E-01 | 8.90E-01 |
| <b>FLJ37035</b>    | -0.40 | 6.57E-01 | 1.00E+00 | -0.57 | 4.42E-01 | 8.90E-01 |
| <b>FOXP4</b>       | -0.34 | 2.98E-01 | 1.00E+00 | 0.53  | 4.42E-01 | 8.90E-01 |
| <b>PCDHB15</b>     | -0.27 | 5.60E-01 | 1.00E+00 | 0.49  | 4.42E-01 | 8.90E-01 |
| <b>TBX2-AS1</b>    | 0.31  | 7.66E-01 | 1.00E+00 | -0.56 | 4.42E-01 | 8.90E-01 |
| <b>PLCG1</b>       | 0.00  | 9.75E-01 | 1.00E+00 | 0.43  | 4.42E-01 | 8.90E-01 |
| <b>ARHGEF10L</b>   | -0.09 | 7.58E-01 | 1.00E+00 | 0.33  | 4.42E-01 | 8.90E-01 |
| <b>LMCD1</b>       | 0.10  | 7.96E-01 | 1.00E+00 | 0.34  | 4.42E-01 | 8.90E-01 |
| <b>TKFC</b>        | -0.09 | 6.53E-01 | 1.00E+00 | -0.14 | 4.42E-01 | 8.90E-01 |
| <b>ENDOD1</b>      | 0.02  | 9.39E-01 | 1.00E+00 | 0.19  | 4.42E-01 | 8.90E-01 |
| <b>FTX</b>         | 0.27  | 3.84E-01 | 1.00E+00 | -0.14 | 4.42E-01 | 8.90E-01 |
| <b>CAGE1</b>       | -2.89 | 3.93E-01 | 1.00E+00 | 0.93  | 4.42E-01 | 8.90E-01 |
| <b>SERINC1</b>     | 0.28  | 2.36E-01 | 1.00E+00 | -0.22 | 4.42E-01 | 8.90E-01 |
| <b>FAM198B-AS1</b> | -0.57 | 3.74E-01 | 1.00E+00 | -0.45 | 4.42E-01 | 8.90E-01 |
| <b>ACTR5</b>       | -0.09 | 6.57E-01 | 1.00E+00 | -0.21 | 4.42E-01 | 8.90E-01 |
| <b>TUT7</b>        | 0.15  | 7.23E-01 | 1.00E+00 | 0.21  | 4.42E-01 | 8.90E-01 |
| <b>HSP90AA1</b>    | 0.07  | 6.95E-01 | 1.00E+00 | 0.20  | 4.42E-01 | 8.90E-01 |
| <b>BLOC1S2</b>     | -0.11 | 6.66E-01 | 1.00E+00 | -0.27 | 4.42E-01 | 8.90E-01 |
| <b>CHRNB1</b>      | -0.13 | 5.71E-01 | 1.00E+00 | -0.21 | 4.42E-01 | 8.90E-01 |
| <b>PBXIP1</b>      | 0.02  | 9.56E-01 | 1.00E+00 | 0.27  | 4.43E-01 | 8.90E-01 |
| <b>HAGLROS</b>     | -1.46 | 2.75E-01 | 1.00E+00 | -0.61 | 4.43E-01 | 8.90E-01 |
| <b>OTUB2</b>       | -0.76 | 2.13E-01 | 1.00E+00 | 0.42  | 4.43E-01 | 8.90E-01 |
| <b>SPAG4</b>       | 0.06  | 9.26E-01 | 1.00E+00 | 0.84  | 4.43E-01 | 8.90E-01 |
| <b>RPH3AL</b>      | -0.42 | 2.52E-01 | 1.00E+00 | -0.42 | 4.43E-01 | 8.91E-01 |
| <b>TSG101</b>      | 0.08  | 7.02E-01 | 1.00E+00 | -0.23 | 4.43E-01 | 8.91E-01 |
| <b>UBTD2</b>       | 0.21  | 4.58E-01 | 1.00E+00 | 0.34  | 4.43E-01 | 8.91E-01 |
| <b>GRIA4</b>       | -0.11 | 8.42E-01 | 1.00E+00 | -0.63 | 4.43E-01 | 8.91E-01 |
| <b>ARL3</b>        | -0.16 | 5.66E-01 | 1.00E+00 | -0.20 | 4.43E-01 | 8.91E-01 |
| <b>USP46</b>       | 0.40  | 7.56E-02 | 1.00E+00 | 0.18  | 4.43E-01 | 8.91E-01 |
| <b>RPL21P16</b>    | -0.10 | 7.77E-01 | 1.00E+00 | -0.43 | 4.43E-01 | 8.91E-01 |

|                   |       |          |          |       |          |          |
|-------------------|-------|----------|----------|-------|----------|----------|
| <b>PDCD11</b>     | -0.32 | 2.47E-01 | 1.00E+00 | 0.28  | 4.43E-01 | 8.91E-01 |
| <b>QRFP</b>       | -0.28 | 7.94E-01 | 1.00E+00 | 1.03  | 4.43E-01 | 8.91E-01 |
| <b>ZFR</b>        | -0.15 | 3.93E-01 | 1.00E+00 | -0.12 | 4.43E-01 | 8.91E-01 |
| <b>EFR3B</b>      | -0.19 | 7.77E-01 | 1.00E+00 | 0.40  | 4.43E-01 | 8.91E-01 |
| <b>SLC35A4</b>    | -0.27 | 9.83E-02 | 1.00E+00 | 0.10  | 4.43E-01 | 8.91E-01 |
| <b>ROBO2</b>      | -0.27 | 5.63E-01 | 1.00E+00 | -0.40 | 4.43E-01 | 8.91E-01 |
| <b>ZNF451-AS1</b> | -0.53 | 6.74E-01 | 1.00E+00 | -0.50 | 4.44E-01 | 8.91E-01 |
| <b>UBE2M</b>      | -0.12 | 5.78E-01 | 1.00E+00 | -0.41 | 4.44E-01 | 8.91E-01 |
| <b>AGA</b>        | -0.26 | 3.10E-01 | 1.00E+00 | -0.24 | 4.44E-01 | 8.91E-01 |
| <b>TRAPPC6A</b>   | -0.12 | 5.55E-01 | 1.00E+00 | -0.28 | 4.44E-01 | 8.91E-01 |
| <b>AL133383.1</b> | -2.59 | 3.06E-01 | 1.00E+00 | 1.21  | 4.44E-01 | 8.91E-01 |
| <b>BMPR1AP1</b>   | -0.99 | 7.76E-01 | 1.00E+00 | -0.54 | 4.44E-01 | 8.91E-01 |
| <b>PKN2-AS1</b>   | -0.51 | 5.23E-01 | 1.00E+00 | -0.63 | 4.44E-01 | 8.91E-01 |
| <b>AL034379.1</b> | -1.61 | 6.41E-01 | 1.00E+00 | -0.56 | 4.44E-01 | 8.91E-01 |
| <b>GNA13</b>      | 0.10  | 6.46E-01 | 1.00E+00 | 0.17  | 4.44E-01 | 8.91E-01 |
| <b>PRSS30P</b>    | -1.58 | 1.64E-01 | 1.00E+00 | -0.91 | 4.44E-01 | 8.91E-01 |
| <b>BAG3</b>       | -0.27 | 2.37E-01 | 1.00E+00 | -0.35 | 4.44E-01 | 8.91E-01 |
| <b>AL355482.2</b> | -2.29 | 2.22E-01 | 1.00E+00 | -1.07 | 4.44E-01 | 8.91E-01 |
| <b>NF2</b>        | 0.04  | 8.70E-01 | 1.00E+00 | 0.13  | 4.44E-01 | 8.91E-01 |
| <b>PPP2R2D</b>    | 0.03  | 8.31E-01 | 1.00E+00 | -0.36 | 4.44E-01 | 8.91E-01 |
| <b>RPL27</b>      | -0.11 | 7.38E-01 | 1.00E+00 | 0.20  | 4.44E-01 | 8.91E-01 |
| <b>ATP5MF</b>     | -0.06 | 8.05E-01 | 1.00E+00 | -0.39 | 4.44E-01 | 8.91E-01 |
| <b>AL359532.1</b> | 1.13  | 1.34E-01 | 1.00E+00 | 0.77  | 4.44E-01 | 8.91E-01 |
| <b>PVALB</b>      | -0.54 | 8.28E-01 | 1.00E+00 | 1.04  | 4.44E-01 | 8.91E-01 |
| <b>HPGD</b>       | 0.21  | 6.61E-01 | 1.00E+00 | -0.32 | 4.44E-01 | 8.91E-01 |
| <b>ZFAND1</b>     | 0.14  | 5.48E-01 | 1.00E+00 | -0.28 | 4.44E-01 | 8.91E-01 |
| <b>AC092999.1</b> | 1.58  | 2.89E-01 | 1.00E+00 | 0.75  | 4.44E-01 | 8.91E-01 |
| <b>G12029</b>     | 1.37  | 3.90E-01 | 1.00E+00 | 1.04  | 4.44E-01 | 8.91E-01 |
| <b>PRR7</b>       | -1.16 | 1.76E-02 | 8.33E-01 | -0.43 | 4.44E-01 | 8.91E-01 |
| <b>AQP9</b>       | 0.61  | 3.09E-01 | 1.00E+00 | 0.36  | 4.44E-01 | 8.91E-01 |
| <b>AC135506.1</b> | 0.01  | 9.83E-01 | 1.00E+00 | -0.53 | 4.44E-01 | 8.91E-01 |
| <b>LRRC4C</b>     | 0.03  | 9.64E-01 | 1.00E+00 | 0.53  | 4.44E-01 | 8.91E-01 |

|                    |       |          |          |       |          |          |
|--------------------|-------|----------|----------|-------|----------|----------|
| <b>RNF111</b>      | 0.00  | 9.88E-01 | 1.00E+00 | 0.18  | 4.44E-01 | 8.91E-01 |
| <b>AC007298.2</b>  | 0.35  | 8.08E-01 | 1.00E+00 | 0.64  | 4.45E-01 | 8.91E-01 |
| <b>CHST13</b>      | 1.15  | 4.11E-01 | 1.00E+00 | 0.96  | 4.45E-01 | 8.91E-01 |
| <b>DDX39A</b>      | -0.23 | 3.85E-01 | 1.00E+00 | 0.18  | 4.45E-01 | 8.91E-01 |
| <b>SAP18</b>       | 0.04  | 7.94E-01 | 1.00E+00 | -0.19 | 4.45E-01 | 8.91E-01 |
| <b>TARSL2</b>      | -0.14 | 6.39E-01 | 1.00E+00 | -0.24 | 4.45E-01 | 8.91E-01 |
| <b>TRAV25</b>      | -1.45 | 5.31E-01 | 1.00E+00 | 1.24  | 4.45E-01 | 8.91E-01 |
| <b>SNAP25</b>      | -3.49 | 8.57E-02 | 1.00E+00 | 1.00  | 4.45E-01 | 8.91E-01 |
| <b>AF201337.1</b>  | -1.84 | 2.69E-01 | 1.00E+00 | -0.32 | 4.45E-01 | 8.91E-01 |
| <b>FBRSL1</b>      | -0.37 | 2.55E-01 | 1.00E+00 | 0.56  | 4.45E-01 | 8.91E-01 |
| <b>AL390879.1</b>  | -0.51 | 4.45E-01 | 1.00E+00 | -0.39 | 4.45E-01 | 8.91E-01 |
| <b>AC107983.1</b>  | 0.66  | 5.48E-01 | 1.00E+00 | -0.37 | 4.45E-01 | 8.91E-01 |
| <b>ALG1L8P</b>     | -0.31 | 6.99E-01 | 1.00E+00 | -0.58 | 4.45E-01 | 8.91E-01 |
| <b>DYNC1I1</b>     | -0.48 | 2.83E-01 | 1.00E+00 | -0.35 | 4.45E-01 | 8.91E-01 |
| <b>AC005899.8</b>  | -0.36 | 7.68E-01 | 1.00E+00 | 0.57  | 4.45E-01 | 8.91E-01 |
| <b>SRSF9P1</b>     | -2.46 | 4.68E-03 | 3.94E-01 | 0.60  | 4.45E-01 | 8.91E-01 |
| <b>HNRNPL</b>      | -0.19 | 3.97E-01 | 1.00E+00 | 0.40  | 4.45E-01 | 8.91E-01 |
| <b>XLOC_014268</b> | -1.53 | 1.79E-01 | 1.00E+00 | 1.07  | 4.45E-01 | 8.91E-01 |
| <b>SORL1</b>       | 0.26  | 6.75E-01 | 1.00E+00 | 0.28  | 4.45E-01 | 8.91E-01 |
| <b>PHYHD1</b>      | 0.14  | 6.03E-01 | 1.00E+00 | -0.29 | 4.46E-01 | 8.92E-01 |
| <b>SSR1</b>        | 0.10  | 4.62E-01 | 1.00E+00 | -0.15 | 4.46E-01 | 8.92E-01 |
| <b>KRT72</b>       | -0.46 | 8.59E-01 | 1.00E+00 | -0.92 | 4.46E-01 | 8.92E-01 |
| <b>LSG1</b>        | -0.17 | 3.29E-01 | 1.00E+00 | -0.12 | 4.46E-01 | 8.92E-01 |
| <b>ZMPSTE24</b>    | 0.03  | 8.74E-01 | 1.00E+00 | -0.17 | 4.46E-01 | 8.92E-01 |
| <b>WDR41</b>       | 0.22  | 2.15E-01 | 1.00E+00 | -0.17 | 4.46E-01 | 8.92E-01 |
| <b>PEX12</b>       | 0.18  | 6.11E-01 | 1.00E+00 | -0.19 | 4.46E-01 | 8.92E-01 |
| <b>AC090844.2</b>  | 1.89  | 1.57E-01 | 1.00E+00 | -0.76 | 4.46E-01 | 8.92E-01 |
| <b>LUC7L</b>       | -0.26 | 5.09E-01 | 1.00E+00 | 0.26  | 4.46E-01 | 8.92E-01 |
| <b>SPOCK3</b>      | -2.75 | 2.99E-02 | 9.97E-01 | -0.94 | 4.46E-01 | 8.92E-01 |
| <b>ADGRB1</b>      | -0.75 | 1.45E-01 | 1.00E+00 | 0.82  | 4.46E-01 | 8.92E-01 |
| <b>LINC02232</b>   | 0.86  | 4.65E-01 | 1.00E+00 | 0.85  | 4.46E-01 | 8.92E-01 |
| <b>SMYD4</b>       | -0.07 | 7.51E-01 | 1.00E+00 | -0.24 | 4.46E-01 | 8.92E-01 |

|                    |       |          |          |       |          |          |
|--------------------|-------|----------|----------|-------|----------|----------|
| <b>XLOC_004989</b> | 0.75  | 4.40E-01 | 1.00E+00 | -0.80 | 4.46E-01 | 8.92E-01 |
| <b>AL445933.1</b>  | -0.88 | 5.94E-02 | 1.00E+00 | -0.77 | 4.46E-01 | 8.92E-01 |
| <b>HIST1H2BC</b>   | -1.25 | 5.43E-02 | 1.00E+00 | -0.31 | 4.46E-01 | 8.92E-01 |
| <b>MT2P1</b>       | -0.56 | 8.73E-01 | 1.00E+00 | 0.68  | 4.46E-01 | 8.92E-01 |
| <b>DANT2</b>       | 0.96  | 5.39E-01 | 1.00E+00 | -0.62 | 4.46E-01 | 8.92E-01 |
| <b>TNFSF14</b>     | -0.43 | 5.76E-01 | 1.00E+00 | 0.75  | 4.46E-01 | 8.92E-01 |
| <b>MGME1</b>       | 0.04  | 8.89E-01 | 1.00E+00 | 0.19  | 4.46E-01 | 8.92E-01 |
| <b>TK1</b>         | -0.55 | 7.31E-02 | 1.00E+00 | 0.25  | 4.46E-01 | 8.92E-01 |
| <b>UNC93B1</b>     | 0.01  | 9.79E-01 | 1.00E+00 | 0.75  | 4.46E-01 | 8.92E-01 |
| <b>SV2B</b>        | -0.30 | 5.24E-01 | 1.00E+00 | -0.51 | 4.46E-01 | 8.92E-01 |
| <b>VPS4B</b>       | 0.09  | 6.56E-01 | 1.00E+00 | -0.17 | 4.47E-01 | 8.92E-01 |
| <b>AP000787.1</b>  | -0.19 | 7.14E-01 | 1.00E+00 | -0.42 | 4.47E-01 | 8.92E-01 |
| <b>TBC1D23</b>     | 0.18  | 4.52E-01 | 1.00E+00 | -0.17 | 4.47E-01 | 8.92E-01 |
| <b>CCDC85C</b>     | -0.06 | 8.49E-01 | 1.00E+00 | 0.55  | 4.47E-01 | 8.92E-01 |
| <b>ZBTB46</b>      | -0.13 | 6.70E-01 | 1.00E+00 | 0.49  | 4.47E-01 | 8.92E-01 |
| <b>TIGIT</b>       | -0.35 | 6.90E-01 | 1.00E+00 | 2.38  | 4.47E-01 | 8.92E-01 |
| <b>EXOC3L4</b>     | -1.17 | 9.97E-02 | 1.00E+00 | 0.63  | 4.47E-01 | 8.92E-01 |
| <b>KLK5</b>        | -0.05 | 9.32E-01 | 1.00E+00 | 0.49  | 4.47E-01 | 8.92E-01 |
| <b>ZFYVE21</b>     | 0.17  | 3.95E-01 | 1.00E+00 | -0.24 | 4.47E-01 | 8.92E-01 |
| <b>SYT1</b>        | 0.01  | 9.97E-01 | 1.00E+00 | 0.44  | 4.47E-01 | 8.92E-01 |
| <b>AC138783.12</b> | -3.16 | 7.47E-02 | 1.00E+00 | -0.63 | 4.47E-01 | 8.92E-01 |
| <b>CA8</b>         | 1.11  | 7.49E-02 | 1.00E+00 | -0.54 | 4.47E-01 | 8.92E-01 |
| <b>SPDYE5</b>      | 0.10  | 9.22E-01 | 1.00E+00 | 0.49  | 4.47E-01 | 8.92E-01 |
| <b>AL132857.2</b>  | -0.07 | 9.73E-01 | 1.00E+00 | -0.66 | 4.47E-01 | 8.92E-01 |
| <b>AC107884.1</b>  | -0.73 | 2.44E-01 | 1.00E+00 | 0.53  | 4.47E-01 | 8.92E-01 |
| <b>EIF4EP2</b>     | 0.04  | 9.73E-01 | 1.00E+00 | -0.32 | 4.47E-01 | 8.92E-01 |
| <b>IL27</b>        | -2.81 | 1.31E-01 | 1.00E+00 | 2.40  | 4.47E-01 | 8.92E-01 |
| <b>POLR2L</b>      | -0.11 | 5.31E-01 | 1.00E+00 | -0.23 | 4.47E-01 | 8.92E-01 |
| <b>C6orf62</b>     | 0.33  | 2.49E-01 | 1.00E+00 | 0.27  | 4.47E-01 | 8.92E-01 |
| <b>SMIM10L1</b>    | 0.04  | 8.93E-01 | 1.00E+00 | -0.23 | 4.47E-01 | 8.92E-01 |
| <b>ARHGAP12</b>    | 0.08  | 7.44E-01 | 1.00E+00 | 0.16  | 4.47E-01 | 8.92E-01 |
| <b>LINC00884</b>   | -2.43 | 2.94E-02 | 9.92E-01 | -0.56 | 4.47E-01 | 8.92E-01 |

|                      |       |          |          |       |          |          |
|----------------------|-------|----------|----------|-------|----------|----------|
| <b>AC013400.1</b>    | -1.78 | 6.06E-01 | 1.00E+00 | 1.12  | 4.48E-01 | 8.92E-01 |
| <b>XLOC_006242</b>   | -0.02 | 9.75E-01 | 1.00E+00 | 0.74  | 4.48E-01 | 8.92E-01 |
| <b>AC069282.1</b>    | 1.37  | 6.91E-02 | 1.00E+00 | 0.43  | 4.48E-01 | 8.92E-01 |
| <b>BCAP31</b>        | 0.16  | 4.88E-01 | 1.00E+00 | -0.16 | 4.48E-01 | 8.92E-01 |
| <b>HMGB1P1</b>       | -2.51 | 1.02E-01 | 1.00E+00 | -0.43 | 4.48E-01 | 8.92E-01 |
| <b>AL136531.1</b>    | -2.21 | 3.45E-01 | 1.00E+00 | 0.51  | 4.48E-01 | 8.92E-01 |
| <b>AC026979.3</b>    | 0.87  | 4.83E-01 | 1.00E+00 | 0.88  | 4.48E-01 | 8.93E-01 |
| <b>AL928654.4</b>    | 0.21  | 6.17E-01 | 1.00E+00 | 0.58  | 4.48E-01 | 8.93E-01 |
| <b>ARMCX5</b>        | 0.06  | 8.05E-01 | 1.00E+00 | -0.20 | 4.48E-01 | 8.93E-01 |
| <b>AL353622.1</b>    | 2.46  | 3.18E-02 | 1.00E+00 | 0.82  | 4.48E-01 | 8.93E-01 |
| <b>PI16</b>          | 1.96  | 1.86E-03 | 2.39E-01 | 0.50  | 4.48E-01 | 8.93E-01 |
| <b>AC073063.1</b>    | -0.59 | 7.11E-01 | 1.00E+00 | -0.53 | 4.48E-01 | 8.93E-01 |
| <b>AC017074.1</b>    | -0.38 | 5.90E-01 | 1.00E+00 | 0.80  | 4.48E-01 | 8.93E-01 |
| <b>SRCIN1</b>        | -0.45 | 2.40E-01 | 1.00E+00 | 0.43  | 4.48E-01 | 8.93E-01 |
| <b>G8456</b>         | -0.13 | 8.90E-01 | 1.00E+00 | 0.83  | 4.48E-01 | 8.93E-01 |
| <b>NPL</b>           | -0.33 | 2.61E-01 | 1.00E+00 | 0.31  | 4.48E-01 | 8.93E-01 |
| <b>CHMP1B</b>        | -0.14 | 6.47E-01 | 1.00E+00 | 0.13  | 4.48E-01 | 8.93E-01 |
| <b>STAG3</b>         | -0.94 | 2.16E-02 | 8.94E-01 | 0.31  | 4.48E-01 | 8.93E-01 |
| <b>MTERF4</b>        | 0.04  | 7.77E-01 | 1.00E+00 | 0.15  | 4.48E-01 | 8.93E-01 |
| <b>AC074032.1</b>    | 0.26  | 6.27E-01 | 1.00E+00 | -0.31 | 4.48E-01 | 8.93E-01 |
| <b>AL360219.1</b>    | 0.50  | 8.32E-01 | 1.00E+00 | 0.66  | 4.48E-01 | 8.93E-01 |
| <b>AF111167.2</b>    | -0.38 | 4.70E-01 | 1.00E+00 | 0.67  | 4.49E-01 | 8.93E-01 |
| <b>PTX3</b>          | 0.36  | 4.45E-01 | 1.00E+00 | 0.79  | 4.49E-01 | 8.93E-01 |
| <b>MAN2A2</b>        | 0.25  | 5.32E-01 | 1.00E+00 | 0.46  | 4.49E-01 | 8.93E-01 |
| <b>CCNB1IP1</b>      | -0.25 | 2.93E-01 | 1.00E+00 | -0.19 | 4.49E-01 | 8.93E-01 |
| <b>SYNDIG1L</b>      | 0.80  | 3.71E-01 | 1.00E+00 | -1.03 | 4.49E-01 | 8.93E-01 |
| <b>MRPS36</b>        | -0.01 | 9.78E-01 | 1.00E+00 | -0.25 | 4.49E-01 | 8.93E-01 |
| <b>ID2-AS1</b>       | -0.23 | 6.04E-01 | 1.00E+00 | -0.40 | 4.49E-01 | 8.93E-01 |
| <b>AC084757.3</b>    | -1.75 | 2.35E-01 | 1.00E+00 | 1.00  | 4.49E-01 | 8.93E-01 |
| <b>CASC2</b>         | -0.21 | 7.23E-01 | 1.00E+00 | 0.35  | 4.49E-01 | 8.93E-01 |
| <b>RP11-439A17.7</b> | 1.42  | 4.60E-01 | 1.00E+00 | 0.58  | 4.49E-01 | 8.93E-01 |
| <b>CFHR3</b>         | 0.90  | 7.96E-01 | 1.00E+00 | 0.53  | 4.49E-01 | 8.93E-01 |

|                    |       |          |          |       |          |          |
|--------------------|-------|----------|----------|-------|----------|----------|
| <b>ADCY6</b>       | 0.48  | 3.37E-01 | 1.00E+00 | 0.56  | 4.49E-01 | 8.93E-01 |
| <b>PNMA2</b>       | -0.91 | 2.27E-01 | 1.00E+00 | 0.75  | 4.49E-01 | 8.93E-01 |
| <b>ARRDC5</b>      | -2.47 | 2.39E-01 | 1.00E+00 | 1.38  | 4.49E-01 | 8.93E-01 |
| <b>PHTF1</b>       | 0.44  | 3.38E-01 | 1.00E+00 | 0.49  | 4.49E-01 | 8.93E-01 |
| <b>SERGEF</b>      | -0.09 | 7.70E-01 | 1.00E+00 | -0.18 | 4.49E-01 | 8.93E-01 |
| <b>GPM6B</b>       | -0.29 | 4.25E-01 | 1.00E+00 | 0.18  | 4.49E-01 | 8.93E-01 |
| <b>TRAV38-2DV8</b> | 0.37  | 8.75E-01 | 1.00E+00 | 1.00  | 4.49E-01 | 8.93E-01 |
| <b>RAB39B</b>      | -1.30 | 1.48E-01 | 1.00E+00 | 0.84  | 4.49E-01 | 8.93E-01 |
| <b>POLE3</b>       | 0.04  | 8.57E-01 | 1.00E+00 | -0.14 | 4.49E-01 | 8.93E-01 |
| <b>AC012184.3</b>  | 0.56  | 5.31E-01 | 1.00E+00 | -0.72 | 4.49E-01 | 8.93E-01 |
| <b>HARS</b>        | -0.03 | 8.71E-01 | 1.00E+00 | 0.13  | 4.49E-01 | 8.93E-01 |
| <b>SNRPGP10</b>    | 0.03  | 9.59E-01 | 1.00E+00 | -0.36 | 4.50E-01 | 8.93E-01 |
| <b>ZNF226</b>      | 0.14  | 4.32E-01 | 1.00E+00 | -0.21 | 4.50E-01 | 8.93E-01 |
| <b>AL023806.1</b>  | 0.30  | 8.76E-01 | 1.00E+00 | -1.07 | 4.50E-01 | 8.93E-01 |
| <b>RNF11</b>       | 0.13  | 5.49E-01 | 1.00E+00 | -0.23 | 4.50E-01 | 8.93E-01 |
| <b>RPS6KB1</b>     | -0.04 | 8.41E-01 | 1.00E+00 | 0.13  | 4.50E-01 | 8.94E-01 |
| <b>CD3E</b>        | -1.06 | 5.93E-02 | 1.00E+00 | 2.03  | 4.50E-01 | 8.94E-01 |
| <b>POM121</b>      | -0.34 | 1.42E-01 | 1.00E+00 | 0.50  | 4.50E-01 | 8.94E-01 |
| <b>FAM86FP</b>     | 0.23  | 6.88E-01 | 1.00E+00 | 0.39  | 4.50E-01 | 8.94E-01 |
| <b>CACNA1D</b>     | -0.01 | 9.79E-01 | 1.00E+00 | -0.53 | 4.50E-01 | 8.94E-01 |
| <b>TPM1</b>        | -0.02 | 9.68E-01 | 1.00E+00 | -0.24 | 4.50E-01 | 8.94E-01 |
| <b>ZNF10</b>       | 0.28  | 4.71E-01 | 1.00E+00 | -0.41 | 4.50E-01 | 8.94E-01 |
| <b>DHX30</b>       | -0.17 | 3.61E-01 | 1.00E+00 | 0.17  | 4.50E-01 | 8.94E-01 |
| <b>SF3B4</b>       | -0.33 | 1.44E-01 | 1.00E+00 | 0.15  | 4.50E-01 | 8.94E-01 |
| <b>XLOC_001162</b> | -0.17 | 9.28E-01 | 1.00E+00 | 0.94  | 4.50E-01 | 8.94E-01 |
| <b>SNX2</b>        | -0.04 | 8.45E-01 | 1.00E+00 | -0.21 | 4.50E-01 | 8.94E-01 |
| <b>TMEM131L</b>    | 0.21  | 5.65E-01 | 1.00E+00 | 0.20  | 4.50E-01 | 8.94E-01 |
| <b>IGHGP</b>       | 2.35  | 4.24E-02 | 1.00E+00 | -0.73 | 4.50E-01 | 8.94E-01 |
| <b>GJA4</b>        | 0.14  | 7.84E-01 | 1.00E+00 | 0.42  | 4.51E-01 | 8.94E-01 |
| <b>LANCL1</b>      | -0.05 | 8.52E-01 | 1.00E+00 | -0.22 | 4.51E-01 | 8.94E-01 |
| <b>SCARNA9</b>     | 0.44  | 7.12E-01 | 1.00E+00 | 0.41  | 4.51E-01 | 8.94E-01 |
| <b>TIMM17A</b>     | 0.05  | 8.27E-01 | 1.00E+00 | -0.20 | 4.51E-01 | 8.94E-01 |

|                    |       |          |          |       |          |          |
|--------------------|-------|----------|----------|-------|----------|----------|
| <b>AC023043.4</b>  | -0.31 | 7.84E-01 | 1.00E+00 | 0.68  | 4.51E-01 | 8.94E-01 |
| <b>SMARCAD1</b>    | -0.02 | 9.45E-01 | 1.00E+00 | 0.21  | 4.51E-01 | 8.94E-01 |
| <b>TRERF1</b>      | -0.47 | 1.87E-01 | 1.00E+00 | 0.36  | 4.51E-01 | 8.94E-01 |
| <b>SNRPCP3</b>     | -2.23 | 4.84E-01 | 1.00E+00 | -0.83 | 4.51E-01 | 8.94E-01 |
| <b>ZNF287</b>      | -0.22 | 2.98E-01 | 1.00E+00 | -0.26 | 4.51E-01 | 8.94E-01 |
| <b>AL358115.1</b>  | 0.38  | 8.75E-01 | 1.00E+00 | -1.06 | 4.51E-01 | 8.94E-01 |
| <b>POGLUT1</b>     | 0.22  | 4.25E-01 | 1.00E+00 | -0.17 | 4.51E-01 | 8.94E-01 |
| <b>G16245</b>      | -1.32 | 6.50E-01 | 1.00E+00 | 1.37  | 4.51E-01 | 8.94E-01 |
| <b>OXCT2P1</b>     | -0.64 | 5.59E-01 | 1.00E+00 | 0.73  | 4.51E-01 | 8.94E-01 |
| <b>HNRNPUL1</b>    | -0.20 | 3.97E-01 | 1.00E+00 | 0.28  | 4.51E-01 | 8.94E-01 |
| <b>MT-ND4</b>      | 0.03  | 9.49E-01 | 1.00E+00 | -0.28 | 4.51E-01 | 8.94E-01 |
| <b>SKIL</b>        | -0.01 | 9.80E-01 | 1.00E+00 | 0.22  | 4.51E-01 | 8.94E-01 |
| <b>UHRF1</b>       | -0.93 | 1.41E-02 | 7.46E-01 | 0.37  | 4.51E-01 | 8.94E-01 |
| <b>CDC20P1</b>     | 0.26  | 7.38E-01 | 1.00E+00 | -0.41 | 4.51E-01 | 8.94E-01 |
| <b>AC009120.1</b>  | -0.24 | 8.71E-01 | 1.00E+00 | 0.86  | 4.51E-01 | 8.94E-01 |
| <b>AMZ2P1</b>      | 0.24  | 4.53E-01 | 1.00E+00 | -0.35 | 4.51E-01 | 8.94E-01 |
| <b>ZNF552</b>      | 0.48  | 1.03E-01 | 1.00E+00 | 0.23  | 4.51E-01 | 8.94E-01 |
| <b>ARPC5L</b>      | -0.23 | 4.98E-01 | 1.00E+00 | -0.25 | 4.51E-01 | 8.94E-01 |
| <b>AC026356.1</b>  | -0.37 | 7.13E-01 | 1.00E+00 | 0.77  | 4.51E-01 | 8.94E-01 |
| <b>TPT1P6</b>      | -1.52 | 6.60E-01 | 1.00E+00 | -0.72 | 4.52E-01 | 8.94E-01 |
| <b>AL157400.4</b>  | -1.19 | 4.74E-01 | 1.00E+00 | -1.01 | 4.52E-01 | 8.94E-01 |
| <b>XLOC_008530</b> | -1.49 | 1.08E-01 | 1.00E+00 | -0.89 | 4.52E-01 | 8.94E-01 |
| <b>TXNRD2</b>      | 0.02  | 9.45E-01 | 1.00E+00 | 0.31  | 4.52E-01 | 8.94E-01 |
| <b>ZWILCH</b>      | -0.42 | 1.25E-01 | 1.00E+00 | 0.18  | 4.52E-01 | 8.94E-01 |
| <b>TBL2</b>        | -0.03 | 8.89E-01 | 1.00E+00 | -0.18 | 4.52E-01 | 8.94E-01 |
| <b>XLOC_009526</b> | -0.59 | 6.40E-01 | 1.00E+00 | -1.07 | 4.52E-01 | 8.95E-01 |
| <b>KIF23</b>       | 0.22  | 5.17E-01 | 1.00E+00 | 0.33  | 4.52E-01 | 8.95E-01 |
| <b>SMG1</b>        | -0.08 | 7.65E-01 | 1.00E+00 | 0.32  | 4.52E-01 | 8.95E-01 |
| <b>HLA-DRB1</b>    | -0.01 | 9.87E-01 | 1.00E+00 | 0.33  | 4.52E-01 | 8.95E-01 |
| <b>FAP</b>         | 0.15  | 8.34E-01 | 1.00E+00 | 1.81  | 4.52E-01 | 8.95E-01 |
| <b>MIR600HG</b>    | 0.01  | 9.89E-01 | 1.00E+00 | -0.64 | 4.52E-01 | 8.95E-01 |
| <b>NEB</b>         | -0.57 | 2.77E-01 | 1.00E+00 | 0.49  | 4.52E-01 | 8.95E-01 |



|                   |       |          |          |       |          |          |
|-------------------|-------|----------|----------|-------|----------|----------|
| <b>AC138207.1</b> | 1.12  | 5.64E-01 | 1.00E+00 | -0.94 | 4.52E-01 | 8.95E-01 |
| <b>G37230</b>     | -1.88 | 6.20E-02 | 1.00E+00 | 0.59  | 4.52E-01 | 8.95E-01 |
| <b>ZC3H8</b>      | 0.03  | 9.34E-01 | 1.00E+00 | -0.22 | 4.52E-01 | 8.95E-01 |
| <b>MIER3</b>      | 0.17  | 6.55E-01 | 1.00E+00 | 0.22  | 4.52E-01 | 8.95E-01 |
| <b>KLHDC9</b>     | 0.25  | 6.94E-01 | 1.00E+00 | -0.41 | 4.52E-01 | 8.95E-01 |
| <b>ZNF649</b>     | 0.06  | 8.20E-01 | 1.00E+00 | -0.17 | 4.53E-01 | 8.95E-01 |
| <b>TSPAN8</b>     | 0.73  | 2.98E-01 | 1.00E+00 | -0.53 | 4.53E-01 | 8.95E-01 |
| <b>SRSF11</b>     | 0.18  | 3.97E-01 | 1.00E+00 | -0.12 | 4.53E-01 | 8.95E-01 |
| <b>PIGBOS1</b>    | 0.03  | 9.04E-01 | 1.00E+00 | -0.23 | 4.53E-01 | 8.95E-01 |
| <b>AP001636.2</b> | -2.96 | 7.12E-02 | 1.00E+00 | -0.72 | 4.53E-01 | 8.95E-01 |
| <b>FUT7</b>       | 0.03  | 9.76E-01 | 1.00E+00 | 0.74  | 4.53E-01 | 8.95E-01 |
| <b>AC104109.4</b> | -1.08 | 5.13E-01 | 1.00E+00 | 0.65  | 4.53E-01 | 8.95E-01 |
| <b>SNCG</b>       | 0.60  | 3.01E-01 | 1.00E+00 | -0.35 | 4.53E-01 | 8.95E-01 |
| <b>KLHL42</b>     | -0.13 | 4.39E-01 | 1.00E+00 | -0.22 | 4.53E-01 | 8.95E-01 |
| <b>AP000704.1</b> | -0.61 | 8.55E-01 | 1.00E+00 | -0.62 | 4.53E-01 | 8.95E-01 |
| <b>AC140479.5</b> | -0.57 | 6.53E-01 | 1.00E+00 | -0.34 | 4.53E-01 | 8.95E-01 |
| <b>XKR4</b>       | 0.23  | 6.18E-01 | 1.00E+00 | -0.62 | 4.53E-01 | 8.95E-01 |
| <b>SLC22A23</b>   | -0.43 | 2.42E-01 | 1.00E+00 | 0.36  | 4.53E-01 | 8.95E-01 |
| <b>DNAH2</b>      | -1.21 | 2.59E-01 | 1.00E+00 | -0.72 | 4.53E-01 | 8.95E-01 |
| <b>AP003501.3</b> | 0.36  | 7.62E-01 | 1.00E+00 | -0.90 | 4.53E-01 | 8.95E-01 |
| <b>MYZAP</b>      | 1.14  | 5.77E-02 | 1.00E+00 | -0.34 | 4.53E-01 | 8.95E-01 |
| <b>SLC10A6</b>    | -0.21 | 6.74E-01 | 1.00E+00 | 0.31  | 4.53E-01 | 8.95E-01 |
| <b>PCMTD2</b>     | 0.09  | 6.99E-01 | 1.00E+00 | -0.20 | 4.53E-01 | 8.95E-01 |
| <b>MMP15</b>      | -0.22 | 4.37E-01 | 1.00E+00 | 0.51  | 4.53E-01 | 8.95E-01 |
| <b>CCT6B</b>      | 0.51  | 1.51E-01 | 1.00E+00 | -0.35 | 4.53E-01 | 8.95E-01 |
| <b>AC016597.1</b> | 1.52  | 4.97E-01 | 1.00E+00 | 0.93  | 4.53E-01 | 8.95E-01 |
| <b>FAM217B</b>    | -0.01 | 9.70E-01 | 1.00E+00 | 0.15  | 4.54E-01 | 8.95E-01 |
| <b>LIN54</b>      | 0.01  | 9.69E-01 | 1.00E+00 | -0.27 | 4.54E-01 | 8.95E-01 |
| <b>RNF6</b>       | 0.00  | 9.94E-01 | 1.00E+00 | -0.18 | 4.54E-01 | 8.95E-01 |
| <b>RPS19P1</b>    | -0.58 | 8.67E-01 | 1.00E+00 | -0.55 | 4.54E-01 | 8.95E-01 |
| <b>AC096733.2</b> | 0.12  | 8.26E-01 | 1.00E+00 | 0.55  | 4.54E-01 | 8.95E-01 |
| <b>SOHLH1</b>     | -2.79 | 5.39E-02 | 1.00E+00 | -1.11 | 4.54E-01 | 8.95E-01 |

|                   |       |          |          |       |          |          |
|-------------------|-------|----------|----------|-------|----------|----------|
| <b>RASGRP2</b>    | -0.30 | 5.48E-01 | 1.00E+00 | 0.44  | 4.54E-01 | 8.95E-01 |
| <b>IGSF10</b>     | 0.49  | 2.91E-01 | 1.00E+00 | 0.52  | 4.54E-01 | 8.95E-01 |
| <b>NUMB</b>       | -0.06 | 7.54E-01 | 1.00E+00 | 0.14  | 4.54E-01 | 8.95E-01 |
| <b>KLRF2</b>      | -0.28 | 7.81E-01 | 1.00E+00 | -0.56 | 4.54E-01 | 8.95E-01 |
| <b>AP001363.1</b> | 0.55  | 5.44E-01 | 1.00E+00 | 0.61  | 4.54E-01 | 8.95E-01 |
| <b>PPP4R2</b>     | 0.19  | 4.98E-01 | 1.00E+00 | -0.33 | 4.54E-01 | 8.95E-01 |
| <b>DEGS1</b>      | -0.02 | 9.62E-01 | 1.00E+00 | -0.37 | 4.54E-01 | 8.95E-01 |
| <b>CD28</b>       | 1.27  | 1.26E-01 | 1.00E+00 | 0.72  | 4.54E-01 | 8.95E-01 |
| <b>TRPC6</b>      | -0.15 | 6.76E-01 | 1.00E+00 | 0.34  | 4.54E-01 | 8.95E-01 |
| <b>AP003774.1</b> | -1.14 | 2.99E-01 | 1.00E+00 | 1.16  | 4.54E-01 | 8.95E-01 |
| <b>ADCY8</b>      | 0.73  | 5.94E-01 | 1.00E+00 | -0.65 | 4.54E-01 | 8.95E-01 |
| <b>SLC9A5</b>     | -0.80 | 5.96E-02 | 1.00E+00 | 0.47  | 4.54E-01 | 8.95E-01 |
| <b>AC009032.1</b> | -1.09 | 6.50E-01 | 1.00E+00 | -0.79 | 4.54E-01 | 8.95E-01 |
| <b>AGAP3</b>      | -0.10 | 7.06E-01 | 1.00E+00 | 0.40  | 4.54E-01 | 8.95E-01 |
| <b>CHORDC1</b>    | -0.20 | 7.12E-01 | 1.00E+00 | -0.24 | 4.54E-01 | 8.95E-01 |
| <b>SFR1</b>       | 0.34  | 2.89E-01 | 1.00E+00 | -0.29 | 4.54E-01 | 8.95E-01 |
| <b>AC091152.4</b> | -0.87 | 4.97E-01 | 1.00E+00 | 0.96  | 4.54E-01 | 8.95E-01 |
| <b>MYO1B</b>      | -0.19 | 3.98E-01 | 1.00E+00 | 0.41  | 4.54E-01 | 8.95E-01 |
| <b>G31765</b>     | 1.48  | 3.51E-02 | 1.00E+00 | -0.72 | 4.54E-01 | 8.95E-01 |
| <b>AC095055.1</b> | -0.74 | 1.91E-01 | 1.00E+00 | -0.47 | 4.54E-01 | 8.95E-01 |
| <b>DNAJC15</b>    | 0.10  | 6.71E-01 | 1.00E+00 | -0.20 | 4.54E-01 | 8.95E-01 |
| <b>EDN1</b>       | -0.04 | 9.06E-01 | 1.00E+00 | -0.36 | 4.54E-01 | 8.95E-01 |
| <b>ARSF</b>       | -0.86 | 1.60E-01 | 1.00E+00 | 0.56  | 4.54E-01 | 8.95E-01 |
| <b>PADI4</b>      | -1.17 | 7.28E-01 | 1.00E+00 | 0.76  | 4.54E-01 | 8.95E-01 |
| <b>AL121871.1</b> | -0.67 | 8.47E-01 | 1.00E+00 | -0.61 | 4.54E-01 | 8.95E-01 |
| <b>KY</b>         | 0.15  | 7.21E-01 | 1.00E+00 | -0.47 | 4.54E-01 | 8.95E-01 |
| <b>AC007000.1</b> | -2.52 | 4.93E-02 | 1.00E+00 | 0.61  | 4.54E-01 | 8.95E-01 |
| <b>S100A16</b>    | -0.17 | 6.25E-01 | 1.00E+00 | 0.21  | 4.55E-01 | 8.95E-01 |
| <b>CFH</b>        | 0.67  | 1.21E-01 | 1.00E+00 | 0.41  | 4.55E-01 | 8.95E-01 |
| <b>PSMA2</b>      | 0.17  | 6.69E-01 | 1.00E+00 | -0.34 | 4.55E-01 | 8.95E-01 |
| <b>MLF1</b>       | 0.03  | 9.29E-01 | 1.00E+00 | -0.35 | 4.55E-01 | 8.95E-01 |
| <b>FTSJ1</b>      | -0.25 | 3.36E-01 | 1.00E+00 | 0.12  | 4.55E-01 | 8.95E-01 |

|                    |       |          |          |       |          |          |
|--------------------|-------|----------|----------|-------|----------|----------|
| <b>EIF4G1</b>      | -0.31 | 2.33E-01 | 1.00E+00 | 0.36  | 4.55E-01 | 8.95E-01 |
| <b>ARCN1</b>       | -0.01 | 9.55E-01 | 1.00E+00 | -0.22 | 4.55E-01 | 8.95E-01 |
| <b>SEC22A</b>      | 0.09  | 6.94E-01 | 1.00E+00 | -0.19 | 4.55E-01 | 8.95E-01 |
| <b>TPSAB1</b>      | 0.80  | 2.00E-01 | 1.00E+00 | 0.40  | 4.55E-01 | 8.95E-01 |
| <b>AC106897.1</b>  | 0.72  | 7.87E-01 | 1.00E+00 | -0.54 | 4.55E-01 | 8.96E-01 |
| <b>ADAMTS7P3</b>   | 0.43  | 7.55E-01 | 1.00E+00 | -0.38 | 4.55E-01 | 8.96E-01 |
| <b>RNF4</b>        | -0.01 | 9.52E-01 | 1.00E+00 | 0.11  | 4.55E-01 | 8.96E-01 |
| <b>RPL22L1</b>     | -0.20 | 4.34E-01 | 1.00E+00 | 0.24  | 4.55E-01 | 8.96E-01 |
| <b>WDR7</b>        | -0.05 | 7.73E-01 | 1.00E+00 | 0.25  | 4.55E-01 | 8.96E-01 |
| <b>G43235</b>      | 0.80  | 3.36E-01 | 1.00E+00 | 0.71  | 4.56E-01 | 8.96E-01 |
| <b>MCM8</b>        | -0.28 | 2.74E-01 | 1.00E+00 | 0.36  | 4.56E-01 | 8.96E-01 |
| <b>AL356740.3</b>  | 0.02  | 9.86E-01 | 1.00E+00 | -0.61 | 4.56E-01 | 8.96E-01 |
| <b>AC104211.1</b>  | -0.90 | 7.87E-01 | 1.00E+00 | -1.01 | 4.56E-01 | 8.96E-01 |
| <b>KIR2DL4</b>     | -3.59 | 2.77E-01 | 1.00E+00 | 1.06  | 4.56E-01 | 8.96E-01 |
| <b>AL161911.1</b>  | -1.92 | 1.06E-01 | 1.00E+00 | -0.93 | 4.56E-01 | 8.96E-01 |
| <b>HOXA-AS3</b>    | -0.88 | 3.55E-01 | 1.00E+00 | -0.45 | 4.56E-01 | 8.96E-01 |
| <b>NRDE2</b>       | 0.04  | 8.77E-01 | 1.00E+00 | 0.28  | 4.56E-01 | 8.96E-01 |
| <b>SEPT7P6</b>     | -0.06 | 9.86E-01 | 1.00E+00 | -0.48 | 4.56E-01 | 8.96E-01 |
| <b>XLOC_001640</b> | 0.45  | 7.71E-01 | 1.00E+00 | -0.54 | 4.56E-01 | 8.96E-01 |
| <b>ZNHIT3</b>      | 0.46  | 7.39E-02 | 1.00E+00 | 0.15  | 4.56E-01 | 8.96E-01 |
| <b>AL590452.1</b>  | -0.60 | 6.99E-01 | 1.00E+00 | 0.79  | 4.56E-01 | 8.96E-01 |
| <b>INTS6L</b>      | 0.36  | 2.45E-01 | 1.00E+00 | 0.31  | 4.56E-01 | 8.96E-01 |
| <b>KRT18P59</b>    | 1.52  | 3.14E-01 | 1.00E+00 | 0.99  | 4.56E-01 | 8.96E-01 |
| <b>PPP2R2C</b>     | -0.06 | 8.58E-01 | 1.00E+00 | 0.51  | 4.56E-01 | 8.96E-01 |
| <b>RN7SL336P</b>   | 2.83  | 3.71E-02 | 1.00E+00 | 0.62  | 4.56E-01 | 8.96E-01 |
| <b>PHETA1</b>      | -0.07 | 8.23E-01 | 1.00E+00 | 0.47  | 4.56E-01 | 8.96E-01 |
| <b>NODAL</b>       | -2.84 | 1.14E-01 | 1.00E+00 | 1.02  | 4.56E-01 | 8.96E-01 |
| <b>ATXN7L2</b>     | -0.01 | 9.66E-01 | 1.00E+00 | 0.34  | 4.56E-01 | 8.96E-01 |
| <b>KMT5A</b>       | -0.04 | 8.93E-01 | 1.00E+00 | 0.20  | 4.56E-01 | 8.96E-01 |
| <b>AL031432.3</b>  | 0.66  | 4.49E-01 | 1.00E+00 | 0.40  | 4.56E-01 | 8.96E-01 |
| <b>WDR83</b>       | 0.08  | 8.84E-01 | 1.00E+00 | 0.32  | 4.57E-01 | 8.96E-01 |
| <b>ZNF598</b>      | -0.44 | 2.02E-01 | 1.00E+00 | 0.53  | 4.57E-01 | 8.96E-01 |

|             |       |          |          |       |          |          |
|-------------|-------|----------|----------|-------|----------|----------|
| ZNF784      | -0.14 | 6.58E-01 | 1.00E+00 | 0.59  | 4.57E-01 | 8.96E-01 |
| AC008393.1  | -0.95 | 5.55E-02 | 1.00E+00 | -0.51 | 4.57E-01 | 8.96E-01 |
| AC006262.1  | -0.09 | 8.94E-01 | 1.00E+00 | 0.63  | 4.57E-01 | 8.96E-01 |
| AC022211.2  | -0.76 | 1.10E-01 | 1.00E+00 | 0.54  | 4.57E-01 | 8.96E-01 |
| AL606970.3  | -2.95 | 3.06E-01 | 1.00E+00 | 1.28  | 4.57E-01 | 8.96E-01 |
| ZNF224      | 0.41  | 4.47E-01 | 1.00E+00 | -0.26 | 4.57E-01 | 8.96E-01 |
| G26828      | 0.81  | 3.79E-01 | 1.00E+00 | 0.70  | 4.57E-01 | 8.96E-01 |
| CHCHD2P9    | -1.77 | 2.03E-01 | 1.00E+00 | 0.54  | 4.57E-01 | 8.96E-01 |
| PLPPR1      | 0.48  | 6.65E-01 | 1.00E+00 | -0.70 | 4.57E-01 | 8.96E-01 |
| TMEM38A     | -0.02 | 9.75E-01 | 1.00E+00 | -0.38 | 4.57E-01 | 8.96E-01 |
| RNF207      | -0.03 | 9.62E-01 | 1.00E+00 | 0.58  | 4.57E-01 | 8.96E-01 |
| RHBDL2      | 0.26  | 5.35E-01 | 1.00E+00 | -0.36 | 4.57E-01 | 8.96E-01 |
| AC105206.2  | -2.36 | 7.86E-02 | 1.00E+00 | 1.03  | 4.57E-01 | 8.96E-01 |
| SCO2        | -0.17 | 7.19E-01 | 1.00E+00 | 0.23  | 4.57E-01 | 8.96E-01 |
| ABCB7       | 0.10  | 6.21E-01 | 1.00E+00 | 0.17  | 4.57E-01 | 8.96E-01 |
| G37568      | -1.34 | 3.52E-01 | 1.00E+00 | 0.90  | 4.57E-01 | 8.96E-01 |
| CALHM6      | -0.86 | 2.07E-01 | 1.00E+00 | 2.33  | 4.57E-01 | 8.96E-01 |
| SLC6A1      | 0.66  | 4.06E-01 | 1.00E+00 | 0.89  | 4.57E-01 | 8.96E-01 |
| XLOC_010885 | -0.06 | 9.33E-01 | 1.00E+00 | -0.37 | 4.57E-01 | 8.96E-01 |
| AC007485.2  | -0.83 | 2.51E-01 | 1.00E+00 | 0.39  | 4.57E-01 | 8.96E-01 |
| LINC01320   | 0.10  | 9.23E-01 | 1.00E+00 | -0.68 | 4.57E-01 | 8.96E-01 |
| CAMKK2      | 0.04  | 8.54E-01 | 1.00E+00 | 0.23  | 4.57E-01 | 8.96E-01 |
| AC010913.1  | 0.03  | 9.63E-01 | 1.00E+00 | -0.50 | 4.57E-01 | 8.96E-01 |
| BCL7A       | -0.11 | 5.11E-01 | 1.00E+00 | 0.22  | 4.57E-01 | 8.96E-01 |
| NCLN        | -0.22 | 3.45E-01 | 1.00E+00 | 0.40  | 4.57E-01 | 8.96E-01 |
| LRAT        | 0.46  | 5.67E-01 | 1.00E+00 | 2.25  | 4.57E-01 | 8.96E-01 |
| PAFAH2      | 0.24  | 2.09E-01 | 1.00E+00 | -0.17 | 4.57E-01 | 8.96E-01 |
| LINC01852   | 0.88  | 1.98E-01 | 1.00E+00 | -0.55 | 4.57E-01 | 8.96E-01 |
| THAP7       | -0.10 | 6.40E-01 | 1.00E+00 | 0.17  | 4.57E-01 | 8.96E-01 |
| TXNP6       | 2.12  | 5.34E-01 | 1.00E+00 | -0.51 | 4.57E-01 | 8.96E-01 |
| AL136366.1  | -1.12 | 2.11E-01 | 1.00E+00 | -0.76 | 4.58E-01 | 8.96E-01 |
| RPS10P7     | -0.28 | 7.43E-01 | 1.00E+00 | 0.42  | 4.58E-01 | 8.96E-01 |

|                      |       |          |          |       |          |          |
|----------------------|-------|----------|----------|-------|----------|----------|
| <b>POLD1</b>         | -0.19 | 4.00E-01 | 1.00E+00 | 0.42  | 4.58E-01 | 8.96E-01 |
| <b>AL355472.1</b>    | 0.32  | 5.87E-01 | 1.00E+00 | -0.29 | 4.58E-01 | 8.96E-01 |
| <b>GBA2</b>          | 0.20  | 4.82E-01 | 1.00E+00 | 0.28  | 4.58E-01 | 8.96E-01 |
| <b>GNPTAB</b>        | 0.12  | 6.35E-01 | 1.00E+00 | -0.21 | 4.58E-01 | 8.96E-01 |
| <b>GRM1</b>          | -0.78 | 5.80E-01 | 1.00E+00 | 1.11  | 4.58E-01 | 8.96E-01 |
| <b>MS4A6E</b>        | -1.71 | 6.18E-01 | 1.00E+00 | -1.39 | 4.58E-01 | 8.96E-01 |
| <b>LY6G6F-LY6G6D</b> | 0.08  | 9.57E-01 | 1.00E+00 | -0.96 | 4.58E-01 | 8.96E-01 |
| <b>SPC25</b>         | -0.07 | 8.66E-01 | 1.00E+00 | 0.40  | 4.58E-01 | 8.96E-01 |
| <b>BCCIP</b>         | 0.10  | 5.67E-01 | 1.00E+00 | -0.20 | 4.58E-01 | 8.96E-01 |
| <b>AC115618.3</b>    | -0.37 | 3.06E-01 | 1.00E+00 | 0.33  | 4.58E-01 | 8.96E-01 |
| <b>MTOR</b>          | -0.14 | 4.86E-01 | 1.00E+00 | 0.25  | 4.58E-01 | 8.96E-01 |
| <b>KCND1</b>         | -0.15 | 7.67E-01 | 1.00E+00 | 0.73  | 4.58E-01 | 8.96E-01 |
| <b>FRMPD3</b>        | -2.73 | 1.20E-02 | 6.78E-01 | 1.04  | 4.58E-01 | 8.96E-01 |
| <b>AC097103.2</b>    | -0.83 | 1.19E-01 | 1.00E+00 | -0.26 | 4.58E-01 | 8.96E-01 |
| <b>MGARP</b>         | 0.00  | 9.99E-01 | 1.00E+00 | 0.60  | 4.58E-01 | 8.96E-01 |
| <b>THOC6</b>         | -0.24 | 3.78E-01 | 1.00E+00 | 0.15  | 4.58E-01 | 8.96E-01 |
| <b>AL645728.1</b>    | -0.32 | 6.02E-01 | 1.00E+00 | 0.39  | 4.58E-01 | 8.96E-01 |
| <b>MRPL15</b>        | -0.02 | 9.19E-01 | 1.00E+00 | -0.22 | 4.58E-01 | 8.96E-01 |
| <b>STS</b>           | 0.61  | 4.84E-02 | 1.00E+00 | 0.28  | 4.58E-01 | 8.96E-01 |
| <b>CASP9</b>         | -0.01 | 9.78E-01 | 1.00E+00 | 0.29  | 4.58E-01 | 8.96E-01 |
| <b>POP4</b>          | -0.09 | 6.26E-01 | 1.00E+00 | -0.19 | 4.58E-01 | 8.96E-01 |
| <b>GNE</b>           | 0.14  | 7.82E-01 | 1.00E+00 | 0.42  | 4.58E-01 | 8.96E-01 |
| <b>TTI2</b>          | -0.10 | 7.21E-01 | 1.00E+00 | -0.19 | 4.58E-01 | 8.96E-01 |
| <b>AP003117.1</b>    | -0.50 | 6.89E-01 | 1.00E+00 | 0.71  | 4.58E-01 | 8.96E-01 |
| <b>RAB11A</b>        | 0.06  | 8.51E-01 | 1.00E+00 | -0.19 | 4.58E-01 | 8.96E-01 |
| <b>GANC</b>          | 0.04  | 8.63E-01 | 1.00E+00 | 0.18  | 4.58E-01 | 8.96E-01 |
| <b>WAPL</b>          | -0.11 | 6.92E-01 | 1.00E+00 | -0.22 | 4.59E-01 | 8.96E-01 |
| <b>LINC00607</b>     | -1.60 | 1.40E-01 | 1.00E+00 | 0.89  | 4.59E-01 | 8.96E-01 |
| <b>AL512844.1</b>    | -0.67 | 8.48E-01 | 1.00E+00 | -0.53 | 4.59E-01 | 8.96E-01 |
| <b>AC109322.1</b>    | -0.49 | 4.48E-01 | 1.00E+00 | -0.35 | 4.59E-01 | 8.96E-01 |
| <b>G12085</b>        | -2.28 | 2.10E-01 | 1.00E+00 | 0.70  | 4.59E-01 | 8.96E-01 |
| <b>FREM2</b>         | -1.00 | 2.18E-01 | 1.00E+00 | -0.66 | 4.59E-01 | 8.96E-01 |

|                    |       |          |          |       |          |          |
|--------------------|-------|----------|----------|-------|----------|----------|
| <b>AC009812.3</b>  | -0.69 | 6.37E-01 | 1.00E+00 | -0.82 | 4.59E-01 | 8.96E-01 |
| <b>FAM169B</b>     | 1.09  | 5.71E-01 | 1.00E+00 | 0.76  | 4.59E-01 | 8.96E-01 |
| <b>MCFD2</b>       | 0.22  | 3.42E-01 | 1.00E+00 | 0.17  | 4.59E-01 | 8.96E-01 |
| <b>SLC16A6</b>     | -0.65 | 3.69E-01 | 1.00E+00 | 0.49  | 4.59E-01 | 8.96E-01 |
| <b>AC005972.3</b>  | -1.03 | 1.18E-01 | 1.00E+00 | 1.01  | 4.59E-01 | 8.96E-01 |
| <b>RNF20</b>       | 0.17  | 4.00E-01 | 1.00E+00 | -0.10 | 4.59E-01 | 8.96E-01 |
| <b>AL356488.3</b>  | -0.51 | 2.48E-01 | 1.00E+00 | -0.32 | 4.59E-01 | 8.96E-01 |
| <b>XLOC_000166</b> | 3.41  | 3.13E-01 | 1.00E+00 | 0.97  | 4.59E-01 | 8.96E-01 |
| <b>ERP44</b>       | -0.19 | 1.69E-01 | 1.00E+00 | -0.15 | 4.59E-01 | 8.96E-01 |
| <b>WHAMMP3</b>     | 0.37  | 5.77E-01 | 1.00E+00 | 0.56  | 4.59E-01 | 8.96E-01 |
| <b>KRT8P26</b>     | 0.13  | 8.26E-01 | 1.00E+00 | 0.73  | 4.59E-01 | 8.96E-01 |
| <b>RING1</b>       | -0.35 | 9.90E-02 | 1.00E+00 | 0.45  | 4.59E-01 | 8.96E-01 |
| <b>G36840</b>      | 0.27  | 7.87E-01 | 1.00E+00 | -0.94 | 4.59E-01 | 8.96E-01 |
| <b>Y_RNA</b>       | 0.26  | 5.34E-01 | 1.00E+00 | 0.16  | 4.59E-01 | 8.96E-01 |
| <b>XLOC_005181</b> | 0.24  | 8.06E-01 | 1.00E+00 | 0.64  | 4.59E-01 | 8.96E-01 |
| <b>LRRC49</b>      | 0.12  | 7.11E-01 | 1.00E+00 | -0.24 | 4.59E-01 | 8.96E-01 |
| <b>BCL2L13</b>     | 0.11  | 5.34E-01 | 1.00E+00 | 0.11  | 4.59E-01 | 8.96E-01 |
| <b>TTC4</b>        | 0.37  | 6.38E-01 | 1.00E+00 | 0.43  | 4.59E-01 | 8.96E-01 |
| <b>XLOC_013072</b> | -0.37 | 9.16E-01 | 1.00E+00 | 0.68  | 4.60E-01 | 8.96E-01 |
| <b>LARP4</b>       | -0.16 | 6.28E-01 | 1.00E+00 | -0.16 | 4.60E-01 | 8.96E-01 |
| <b>RAMP3</b>       | -0.49 | 3.63E-01 | 1.00E+00 | 0.34  | 4.60E-01 | 8.96E-01 |
| <b>AC079760.2</b>  | -2.63 | 1.11E-01 | 1.00E+00 | -0.77 | 4.60E-01 | 8.96E-01 |
| <b>KCMF1</b>       | 0.05  | 7.62E-01 | 1.00E+00 | -0.32 | 4.60E-01 | 8.96E-01 |
| <b>PCDHB3</b>      | 0.38  | 3.93E-01 | 1.00E+00 | -0.40 | 4.60E-01 | 8.96E-01 |
| <b>CDHR1</b>       | 0.06  | 8.72E-01 | 1.00E+00 | -0.54 | 4.60E-01 | 8.96E-01 |
| <b>HSPA9</b>       | -0.15 | 2.90E-01 | 1.00E+00 | -0.10 | 4.60E-01 | 8.96E-01 |
| <b>CDKAL1</b>      | -0.14 | 5.11E-01 | 1.00E+00 | -0.19 | 4.60E-01 | 8.96E-01 |
| <b>FARSB</b>       | -0.26 | 2.20E-01 | 1.00E+00 | -0.18 | 4.60E-01 | 8.97E-01 |
| <b>SRGAP3</b>      | 0.02  | 9.47E-01 | 1.00E+00 | 0.33  | 4.60E-01 | 8.97E-01 |
| <b>MIR589</b>      | 1.30  | 3.02E-01 | 1.00E+00 | 0.83  | 4.60E-01 | 8.97E-01 |
| <b>AC105233.5</b>  | -0.62 | 2.06E-01 | 1.00E+00 | -0.48 | 4.60E-01 | 8.97E-01 |
| <b>WFS1</b>        | -0.10 | 6.40E-01 | 1.00E+00 | -0.29 | 4.60E-01 | 8.97E-01 |

|                    |       |          |          |       |          |          |
|--------------------|-------|----------|----------|-------|----------|----------|
| <b>INTS14</b>      | 0.22  | 3.19E-01 | 1.00E+00 | -0.13 | 4.60E-01 | 8.97E-01 |
| <b>MFNG</b>        | 0.38  | 4.49E-01 | 1.00E+00 | 0.42  | 4.60E-01 | 8.97E-01 |
| <b>RIOK1</b>       | -0.07 | 7.00E-01 | 1.00E+00 | -0.17 | 4.60E-01 | 8.97E-01 |
| <b>CHRNA10</b>     | -0.96 | 4.68E-01 | 1.00E+00 | 1.30  | 4.61E-01 | 8.97E-01 |
| <b>AMER1</b>       | -0.38 | 1.73E-01 | 1.00E+00 | 0.57  | 4.61E-01 | 8.97E-01 |
| <b>KIF9</b>        | 0.03  | 9.24E-01 | 1.00E+00 | -0.23 | 4.61E-01 | 8.97E-01 |
| <b>SCN2B</b>       | 0.25  | 7.30E-01 | 1.00E+00 | 0.51  | 4.61E-01 | 8.97E-01 |
| <b>NPM1P39</b>     | 0.12  | 9.12E-01 | 1.00E+00 | -0.36 | 4.61E-01 | 8.97E-01 |
| <b>SECISBP2</b>    | 0.22  | 2.76E-01 | 1.00E+00 | 0.14  | 4.61E-01 | 8.97E-01 |
| <b>NOMO3</b>       | -0.46 | 2.42E-01 | 1.00E+00 | -1.91 | 4.61E-01 | 8.97E-01 |
| <b>MRM3</b>        | -0.11 | 6.10E-01 | 1.00E+00 | -0.18 | 4.61E-01 | 8.97E-01 |
| <b>PAX3</b>        | -0.03 | 9.48E-01 | 1.00E+00 | -0.40 | 4.61E-01 | 8.97E-01 |
| <b>MEF2D</b>       | -0.19 | 4.46E-01 | 1.00E+00 | 0.44  | 4.61E-01 | 8.97E-01 |
| <b>NUDT8</b>       | 0.03  | 9.29E-01 | 1.00E+00 | -0.23 | 4.61E-01 | 8.97E-01 |
| <b>RNU1-120P</b>   | -0.74 | 7.77E-01 | 1.00E+00 | -0.85 | 4.61E-01 | 8.97E-01 |
| <b>MBNL1</b>       | 0.06  | 7.72E-01 | 1.00E+00 | -0.10 | 4.61E-01 | 8.97E-01 |
| <b>PITPNM3</b>     | 0.15  | 6.62E-01 | 1.00E+00 | -0.43 | 4.61E-01 | 8.97E-01 |
| <b>BCAN</b>        | -1.04 | 4.77E-02 | 1.00E+00 | -0.50 | 4.61E-01 | 8.97E-01 |
| <b>AL139260.1</b>  | -0.18 | 8.16E-01 | 1.00E+00 | -0.48 | 4.61E-01 | 8.97E-01 |
| <b>XLOC_007879</b> | 1.03  | 4.91E-01 | 1.00E+00 | -0.85 | 4.61E-01 | 8.97E-01 |
| <b>PRODH</b>       | -0.01 | 9.78E-01 | 1.00E+00 | -0.38 | 4.61E-01 | 8.97E-01 |
| <b>RANBP2</b>      | 0.04  | 8.34E-01 | 1.00E+00 | 0.24  | 4.61E-01 | 8.97E-01 |
| <b>C1orf131</b>    | 0.00  | 9.99E-01 | 1.00E+00 | -0.20 | 4.61E-01 | 8.97E-01 |
| <b>ZNF300</b>      | 0.19  | 5.04E-01 | 1.00E+00 | -0.41 | 4.61E-01 | 8.97E-01 |
| <b>AC026333.4</b>  | 1.35  | 6.94E-01 | 1.00E+00 | -1.58 | 4.61E-01 | 8.97E-01 |
| <b>RPL10P15</b>    | 0.30  | 8.82E-01 | 1.00E+00 | 0.47  | 4.61E-01 | 8.97E-01 |
| <b>BAALC</b>       | 0.01  | 9.80E-01 | 1.00E+00 | -0.41 | 4.61E-01 | 8.97E-01 |
| <b>PITPNB</b>      | 0.10  | 5.57E-01 | 1.00E+00 | -0.14 | 4.61E-01 | 8.97E-01 |
| <b>C22orf31</b>    | -0.35 | 6.79E-01 | 1.00E+00 | 0.53  | 4.62E-01 | 8.97E-01 |
| <b>CYP51A1-AS1</b> | -1.22 | 2.55E-01 | 1.00E+00 | 0.62  | 4.62E-01 | 8.97E-01 |
| <b>SRM</b>         | -0.34 | 1.47E-01 | 1.00E+00 | -0.44 | 4.62E-01 | 8.97E-01 |
| <b>ATP5BP1</b>     | -0.06 | 9.86E-01 | 1.00E+00 | -1.06 | 4.62E-01 | 8.97E-01 |

|                    |       |          |          |       |          |          |
|--------------------|-------|----------|----------|-------|----------|----------|
| <b>RNVU1-13</b>    | -3.75 | 6.86E-02 | 1.00E+00 | -0.71 | 4.62E-01 | 8.97E-01 |
| <b>AC007240.1</b>  | -1.96 | 1.58E-01 | 1.00E+00 | 0.80  | 4.62E-01 | 8.97E-01 |
| <b>ACVR2A</b>      | 0.20  | 4.20E-01 | 1.00E+00 | -0.29 | 4.62E-01 | 8.97E-01 |
| <b>SEMA5B</b>      | -0.39 | 4.02E-01 | 1.00E+00 | 0.56  | 4.62E-01 | 8.97E-01 |
| <b>BX322562.1</b>  | 0.03  | 9.62E-01 | 1.00E+00 | -0.57 | 4.62E-01 | 8.97E-01 |
| <b>AL356019.2</b>  | 0.12  | 8.89E-01 | 1.00E+00 | 0.68  | 4.62E-01 | 8.97E-01 |
| <b>MOB4</b>        | 0.02  | 9.49E-01 | 1.00E+00 | -0.22 | 4.62E-01 | 8.97E-01 |
| <b>TRPM4</b>       | -0.30 | 2.66E-01 | 1.00E+00 | -0.36 | 4.62E-01 | 8.97E-01 |
| <b>KATNBL1P6</b>   | -0.39 | 9.10E-01 | 1.00E+00 | -0.47 | 4.62E-01 | 8.97E-01 |
| <b>CDC42</b>       | 0.26  | 7.21E-01 | 1.00E+00 | -0.31 | 4.62E-01 | 8.97E-01 |
| <b>TMED6</b>       | 0.51  | 5.76E-01 | 1.00E+00 | -0.68 | 4.62E-01 | 8.97E-01 |
| <b>LNPK</b>        | 0.36  | 8.88E-02 | 1.00E+00 | -0.21 | 4.62E-01 | 8.97E-01 |
| <b>AL136531.2</b>  | -3.18 | 1.16E-01 | 1.00E+00 | 1.31  | 4.62E-01 | 8.97E-01 |
| <b>AC026979.2</b>  | -0.03 | 9.51E-01 | 1.00E+00 | -0.29 | 4.62E-01 | 8.97E-01 |
| <b>G3694</b>       | -1.83 | 5.01E-01 | 1.00E+00 | 0.83  | 4.62E-01 | 8.97E-01 |
| <b>AC139099.2</b>  | -1.54 | 1.39E-01 | 1.00E+00 | 0.73  | 4.62E-01 | 8.97E-01 |
| <b>AP003068.2</b>  | -0.52 | 2.99E-01 | 1.00E+00 | -0.46 | 4.62E-01 | 8.97E-01 |
| <b>CA3-AS1</b>     | -0.37 | 5.10E-01 | 1.00E+00 | -0.49 | 4.62E-01 | 8.97E-01 |
| <b>KIAA0408</b>    | -1.95 | 5.71E-01 | 1.00E+00 | -0.76 | 4.62E-01 | 8.97E-01 |
| <b>PRR7-AS1</b>    | -2.05 | 1.40E-01 | 1.00E+00 | 0.91  | 4.62E-01 | 8.97E-01 |
| <b>PABPN1</b>      | -0.07 | 7.58E-01 | 1.00E+00 | 0.24  | 4.62E-01 | 8.97E-01 |
| <b>RPL26</b>       | -0.04 | 8.93E-01 | 1.00E+00 | -0.44 | 4.62E-01 | 8.97E-01 |
| <b>SMYD3</b>       | 0.01  | 9.63E-01 | 1.00E+00 | -0.21 | 4.63E-01 | 8.97E-01 |
| <b>XLOC_000917</b> | 0.17  | 6.88E-01 | 1.00E+00 | -0.70 | 4.63E-01 | 8.97E-01 |
| <b>USP8</b>        | 0.08  | 6.17E-01 | 1.00E+00 | 0.12  | 4.63E-01 | 8.97E-01 |
| <b>RETSAT</b>      | 0.83  | 4.15E-02 | 1.00E+00 | -0.34 | 4.63E-01 | 8.97E-01 |
| <b>NDUFA8</b>      | -0.01 | 9.68E-01 | 1.00E+00 | -0.16 | 4.63E-01 | 8.97E-01 |
| <b>MIR155HG</b>    | -0.25 | 7.57E-01 | 1.00E+00 | 0.60  | 4.63E-01 | 8.97E-01 |
| <b>FHL1</b>        | 1.15  | 4.50E-02 | 1.00E+00 | -0.42 | 4.63E-01 | 8.98E-01 |
| <b>XLOC_012064</b> | -0.46 | 7.81E-01 | 1.00E+00 | -0.92 | 4.63E-01 | 8.98E-01 |
| <b>TMEM126A</b>    | -0.04 | 8.34E-01 | 1.00E+00 | -0.21 | 4.63E-01 | 8.98E-01 |
| <b>S100A14</b>     | -0.05 | 8.90E-01 | 1.00E+00 | 0.47  | 4.63E-01 | 8.98E-01 |



|                   |       |          |          |       |          |          |
|-------------------|-------|----------|----------|-------|----------|----------|
| <b>APOL3</b>      | -0.02 | 9.74E-01 | 1.00E+00 | 0.52  | 4.63E-01 | 8.98E-01 |
| <b>CRYM-AS1</b>   | -1.29 | 2.84E-01 | 1.00E+00 | -0.56 | 4.63E-01 | 8.98E-01 |
| <b>AP002807.1</b> | -0.15 | 9.17E-01 | 1.00E+00 | 1.32  | 4.63E-01 | 8.98E-01 |
| <b>ZMIZ2</b>      | -0.28 | 2.50E-01 | 1.00E+00 | 0.41  | 4.63E-01 | 8.98E-01 |
| <b>MC1R</b>       | 1.81  | 9.88E-02 | 1.00E+00 | 0.77  | 4.63E-01 | 8.98E-01 |
| <b>LRRK2</b>      | -0.07 | 8.80E-01 | 1.00E+00 | 0.41  | 4.64E-01 | 8.98E-01 |
| <b>LYSMD4</b>     | -0.22 | 4.60E-01 | 1.00E+00 | -0.21 | 4.64E-01 | 8.98E-01 |
| <b>SCMH1</b>      | 0.32  | 4.13E-01 | 1.00E+00 | 0.27  | 4.64E-01 | 8.98E-01 |
| <b>USP33</b>      | 0.36  | 1.66E-01 | 1.00E+00 | -0.20 | 4.64E-01 | 8.98E-01 |
| <b>FLJ21408</b>   | -0.50 | 7.16E-01 | 1.00E+00 | 0.57  | 4.64E-01 | 8.98E-01 |
| <b>G5758</b>      | -1.17 | 3.93E-01 | 1.00E+00 | -1.03 | 4.64E-01 | 8.98E-01 |
| <b>GPKOW</b>      | -0.10 | 6.53E-01 | 1.00E+00 | 0.09  | 4.64E-01 | 8.98E-01 |
| <b>GRB10</b>      | 0.17  | 6.86E-01 | 1.00E+00 | 0.51  | 4.64E-01 | 8.98E-01 |
| <b>CIRBP-AS1</b>  | -0.77 | 4.48E-01 | 1.00E+00 | 0.70  | 4.64E-01 | 8.98E-01 |
| <b>CTBS</b>       | 0.05  | 8.64E-01 | 1.00E+00 | -0.24 | 4.64E-01 | 8.98E-01 |
| <b>HTRA1</b>      | 0.44  | 2.40E-01 | 1.00E+00 | 0.44  | 4.64E-01 | 8.98E-01 |
| <b>CDKL5</b>      | -0.30 | 3.38E-01 | 1.00E+00 | 0.30  | 4.64E-01 | 8.98E-01 |
| <b>AC092045.1</b> | -1.00 | 7.70E-01 | 1.00E+00 | 0.52  | 4.64E-01 | 8.98E-01 |
| <b>DMAP1</b>      | 0.03  | 8.97E-01 | 1.00E+00 | 0.12  | 4.64E-01 | 8.98E-01 |
| <b>DDX19B</b>     | 0.03  | 8.87E-01 | 1.00E+00 | -0.10 | 4.64E-01 | 8.98E-01 |
| <b>CAPN3</b>      | 0.52  | 7.45E-01 | 1.00E+00 | 0.52  | 4.64E-01 | 8.98E-01 |
| <b>RPN1</b>       | -0.03 | 8.14E-01 | 1.00E+00 | 0.13  | 4.64E-01 | 8.98E-01 |
| <b>HCG15</b>      | -1.71 | 3.22E-01 | 1.00E+00 | -0.81 | 4.64E-01 | 8.98E-01 |
| <b>RRAS</b>       | 0.25  | 5.42E-01 | 1.00E+00 | -0.41 | 4.64E-01 | 8.98E-01 |
| <b>CPS1</b>       | 0.44  | 1.70E-01 | 1.00E+00 | 0.40  | 4.64E-01 | 8.98E-01 |
| <b>ERBB3</b>      | 0.09  | 7.89E-01 | 1.00E+00 | -0.36 | 4.64E-01 | 8.98E-01 |
| <b>DNAJC3-DT</b>  | -0.06 | 8.78E-01 | 1.00E+00 | -0.25 | 4.64E-01 | 8.98E-01 |
| <b>TMEM79</b>     | -0.27 | 5.73E-01 | 1.00E+00 | 0.36  | 4.64E-01 | 8.98E-01 |
| <b>SNX21</b>      | -0.07 | 8.50E-01 | 1.00E+00 | -0.22 | 4.64E-01 | 8.98E-01 |
| <b>GNG10</b>      | 0.24  | 8.41E-01 | 1.00E+00 | 0.52  | 4.65E-01 | 8.98E-01 |
| <b>NPR2</b>       | 0.65  | 2.25E-01 | 1.00E+00 | 0.47  | 4.65E-01 | 8.98E-01 |
| <b>SNRPE</b>      | -0.07 | 6.36E-01 | 1.00E+00 | -0.24 | 4.65E-01 | 8.98E-01 |

|                   |       |          |          |       |          |          |
|-------------------|-------|----------|----------|-------|----------|----------|
| <b>TFEC</b>       | 0.40  | 6.02E-01 | 1.00E+00 | 2.29  | 4.65E-01 | 8.98E-01 |
| <b>RWDD2B</b>     | -0.03 | 9.10E-01 | 1.00E+00 | 0.17  | 4.65E-01 | 8.98E-01 |
| <b>MCAM</b>       | 0.44  | 5.23E-01 | 1.00E+00 | 0.54  | 4.65E-01 | 8.98E-01 |
| <b>ABCC9</b>      | 0.52  | 2.98E-01 | 1.00E+00 | 0.36  | 4.65E-01 | 8.98E-01 |
| <b>NANS</b>       | -0.01 | 9.78E-01 | 1.00E+00 | -0.21 | 4.65E-01 | 8.98E-01 |
| <b>HJURP</b>      | 0.08  | 8.83E-01 | 1.00E+00 | 0.43  | 4.65E-01 | 8.98E-01 |
| <b>TET2</b>       | -0.48 | 1.64E-01 | 1.00E+00 | -0.22 | 4.65E-01 | 8.98E-01 |
| <b>GSS</b>        | -0.27 | 1.85E-01 | 1.00E+00 | -0.08 | 4.65E-01 | 8.98E-01 |
| <b>TRIM50</b>     | 0.80  | 4.81E-01 | 1.00E+00 | -1.13 | 4.65E-01 | 8.98E-01 |
| <b>ELANE</b>      | 0.53  | 5.44E-01 | 1.00E+00 | 0.48  | 4.65E-01 | 8.98E-01 |
| <b>LMF2</b>       | -0.10 | 7.32E-01 | 1.00E+00 | 0.31  | 4.65E-01 | 8.98E-01 |
| <b>PAIP2B</b>     | 0.55  | 7.72E-02 | 1.00E+00 | -0.33 | 4.65E-01 | 8.98E-01 |
| <b>FLRT1</b>      | -0.29 | 6.91E-01 | 1.00E+00 | 0.68  | 4.65E-01 | 8.98E-01 |
| <b>FGF11</b>      | -0.59 | 1.93E-01 | 1.00E+00 | 0.57  | 4.65E-01 | 8.98E-01 |
| <b>ARPC2</b>      | 0.02  | 9.11E-01 | 1.00E+00 | -0.19 | 4.65E-01 | 8.98E-01 |
| <b>ADIPOQ</b>     | 4.57  | 1.16E-02 | 6.66E-01 | -0.71 | 4.65E-01 | 8.98E-01 |
| <b>CCDC158</b>    | 1.23  | 2.34E-01 | 1.00E+00 | -0.61 | 4.65E-01 | 8.98E-01 |
| <b>SLC25A22</b>   | -0.64 | 4.19E-02 | 1.00E+00 | -0.48 | 4.65E-01 | 8.99E-01 |
| <b>NGRN</b>       | -0.17 | 4.04E-01 | 1.00E+00 | 0.21  | 4.65E-01 | 8.99E-01 |
| <b>GRM8</b>       | 0.28  | 8.59E-01 | 1.00E+00 | 1.02  | 4.65E-01 | 8.99E-01 |
| <b>RACK1</b>      | -0.26 | 4.26E-01 | 1.00E+00 | 0.16  | 4.66E-01 | 8.99E-01 |
| <b>ZNF502</b>     | 0.46  | 8.39E-02 | 1.00E+00 | -0.22 | 4.66E-01 | 8.99E-01 |
| <b>NUP98</b>      | -0.04 | 8.09E-01 | 1.00E+00 | 0.24  | 4.66E-01 | 8.99E-01 |
| <b>OTOP2</b>      | -1.80 | 1.36E-01 | 1.00E+00 | 0.78  | 4.66E-01 | 8.99E-01 |
| <b>KMT2E</b>      | 0.05  | 8.16E-01 | 1.00E+00 | -0.18 | 4.66E-01 | 8.99E-01 |
| <b>SRP14P3</b>    | NA    | NA       | NA       | -1.01 | 4.66E-01 | 8.99E-01 |
| <b>LINC00957</b>  | 0.07  | 9.02E-01 | 1.00E+00 | 0.52  | 4.66E-01 | 8.99E-01 |
| <b>CPNE1</b>      | -0.04 | 8.94E-01 | 1.00E+00 | 0.19  | 4.66E-01 | 8.99E-01 |
| <b>RNU6-574P</b>  | 0.00  | 9.99E-01 | 1.00E+00 | 0.60  | 4.66E-01 | 8.99E-01 |
| <b>AC139795.2</b> | -0.14 | 7.68E-01 | 1.00E+00 | 0.41  | 4.66E-01 | 8.99E-01 |
| <b>COL11A2</b>    | -0.52 | 5.49E-01 | 1.00E+00 | 0.78  | 4.66E-01 | 8.99E-01 |
| <b>AC139769.1</b> | 0.07  | 8.40E-01 | 1.00E+00 | -0.37 | 4.66E-01 | 8.99E-01 |

|                    |       |          |          |       |          |          |
|--------------------|-------|----------|----------|-------|----------|----------|
| <b>PDHB</b>        | 0.09  | 6.49E-01 | 1.00E+00 | -0.23 | 4.66E-01 | 8.99E-01 |
| <b>ATP1B3P1</b>    | NA    | NA       | NA       | -0.57 | 4.66E-01 | 8.99E-01 |
| <b>WASF3</b>       | 0.52  | 2.75E-01 | 1.00E+00 | -0.33 | 4.66E-01 | 8.99E-01 |
| <b>ALX1</b>        | -0.02 | 9.79E-01 | 1.00E+00 | -0.54 | 4.66E-01 | 8.99E-01 |
| <b>PITPNM2</b>     | -0.15 | 4.97E-01 | 1.00E+00 | 0.52  | 4.66E-01 | 8.99E-01 |
| <b>TCAF2</b>       | -0.27 | 4.12E-01 | 1.00E+00 | 0.33  | 4.67E-01 | 8.99E-01 |
| <b>AC034198.2</b>  | 0.92  | 2.32E-01 | 1.00E+00 | -1.01 | 4.67E-01 | 8.99E-01 |
| <b>FGFBP1</b>      | 0.13  | 8.26E-01 | 1.00E+00 | 0.49  | 4.67E-01 | 8.99E-01 |
| <b>ZNF253</b>      | 0.29  | 4.61E-01 | 1.00E+00 | -0.22 | 4.67E-01 | 8.99E-01 |
| <b>TMEM106C</b>    | 0.24  | 2.23E-01 | 1.00E+00 | -0.22 | 4.67E-01 | 8.99E-01 |
| <b>MESD</b>        | 0.15  | 4.85E-01 | 1.00E+00 | 0.14  | 4.67E-01 | 8.99E-01 |
| <b>PCDH11X</b>     | -1.70 | 4.84E-02 | 1.00E+00 | 0.54  | 4.67E-01 | 8.99E-01 |
| <b>XLOC_008618</b> | 0.72  | 2.85E-01 | 1.00E+00 | 0.67  | 4.67E-01 | 8.99E-01 |
| <b>LINC01118</b>   | 0.81  | 5.45E-01 | 1.00E+00 | 0.83  | 4.67E-01 | 8.99E-01 |
| <b>G30960</b>      | -0.19 | 8.98E-01 | 1.00E+00 | -0.57 | 4.67E-01 | 8.99E-01 |
| <b>AC018690.1</b>  | 0.04  | 9.55E-01 | 1.00E+00 | -0.78 | 4.67E-01 | 8.99E-01 |
| <b>G4403</b>       | 0.05  | 9.08E-01 | 1.00E+00 | -0.72 | 4.67E-01 | 8.99E-01 |
| <b>AC124916.1</b>  | NA    | NA       | NA       | 0.71  | 4.67E-01 | 8.99E-01 |
| <b>PIGCP1</b>      | -0.32 | 4.29E-01 | 1.00E+00 | 0.42  | 4.67E-01 | 8.99E-01 |
| <b>XLOC_002461</b> | -1.11 | 2.34E-01 | 1.00E+00 | -0.87 | 4.67E-01 | 8.99E-01 |
| <b>SEC63P1</b>     | -0.16 | 9.50E-01 | 1.00E+00 | 0.45  | 4.67E-01 | 8.99E-01 |
| <b>AGGF1P2</b>     | 1.53  | 4.28E-01 | 1.00E+00 | -1.98 | 4.67E-01 | 8.99E-01 |
| <b>C19orf71</b>    | -0.38 | 4.95E-01 | 1.00E+00 | 0.80  | 4.67E-01 | 8.99E-01 |
| <b>TPD52L2</b>     | 0.03  | 8.48E-01 | 1.00E+00 | 0.14  | 4.67E-01 | 8.99E-01 |
| <b>SPRR2A</b>      | -1.94 | 5.99E-02 | 1.00E+00 | 2.27  | 4.67E-01 | 8.99E-01 |
| <b>AL024508.2</b>  | -0.78 | 5.61E-01 | 1.00E+00 | 0.52  | 4.67E-01 | 8.99E-01 |
| <b>FAM153C</b>     | -0.38 | 8.08E-01 | 1.00E+00 | -0.63 | 4.67E-01 | 8.99E-01 |
| <b>AC009054.2</b>  | -0.62 | 8.29E-01 | 1.00E+00 | -0.46 | 4.67E-01 | 8.99E-01 |
| <b>AC010422.6</b>  | -0.06 | 9.14E-01 | 1.00E+00 | 0.50  | 4.67E-01 | 8.99E-01 |
| <b>AL353586.1</b>  | -1.01 | 5.04E-01 | 1.00E+00 | -0.76 | 4.67E-01 | 8.99E-01 |
| <b>CFAP36</b>      | -0.09 | 7.36E-01 | 1.00E+00 | -0.14 | 4.67E-01 | 8.99E-01 |
| <b>GADD45GIP1</b>  | -0.11 | 6.26E-01 | 1.00E+00 | -0.32 | 4.68E-01 | 8.99E-01 |

|                   |       |          |          |       |          |          |
|-------------------|-------|----------|----------|-------|----------|----------|
| <b>G34070</b>     | 0.02  | 9.89E-01 | 1.00E+00 | -1.02 | 4.68E-01 | 8.99E-01 |
| <b>ADPRHL2</b>    | -0.24 | 3.25E-01 | 1.00E+00 | 0.14  | 4.68E-01 | 8.99E-01 |
| <b>MPL</b>        | 1.02  | 2.62E-01 | 1.00E+00 | 0.76  | 4.68E-01 | 8.99E-01 |
| <b>C3orf80</b>    | 1.38  | 1.31E-01 | 1.00E+00 | 0.72  | 4.68E-01 | 8.99E-01 |
| <b>HOXB-AS1</b>   | 0.11  | 9.24E-01 | 1.00E+00 | -0.46 | 4.68E-01 | 8.99E-01 |
| <b>C20orf27</b>   | -0.32 | 1.71E-01 | 1.00E+00 | -0.18 | 4.68E-01 | 8.99E-01 |
| <b>TECR</b>       | -0.19 | 4.75E-01 | 1.00E+00 | -0.23 | 4.68E-01 | 8.99E-01 |
| <b>HRCT1</b>      | 0.69  | 3.41E-01 | 1.00E+00 | -0.45 | 4.68E-01 | 8.99E-01 |
| <b>MED26</b>      | -0.28 | 1.38E-01 | 1.00E+00 | -0.37 | 4.68E-01 | 8.99E-01 |
| <b>DPY19L1P1</b>  | -0.22 | 6.17E-01 | 1.00E+00 | 0.37  | 4.68E-01 | 8.99E-01 |
| <b>SGO1-AS1</b>   | 0.16  | 9.09E-01 | 1.00E+00 | 0.75  | 4.68E-01 | 8.99E-01 |
| <b>HRAT92</b>     | -2.17 | 2.55E-01 | 1.00E+00 | -1.17 | 4.68E-01 | 8.99E-01 |
| <b>TMEM163</b>    | 1.51  | 2.23E-01 | 1.00E+00 | 0.80  | 4.68E-01 | 8.99E-01 |
| <b>PRB4</b>       | -0.14 | 9.16E-01 | 1.00E+00 | -0.96 | 4.68E-01 | 9.00E-01 |
| <b>RPL21P93</b>   | -0.22 | 9.02E-01 | 1.00E+00 | -0.44 | 4.68E-01 | 9.00E-01 |
| <b>CLN8</b>       | 0.23  | 5.56E-01 | 1.00E+00 | 0.18  | 4.68E-01 | 9.00E-01 |
| <b>PLCG2</b>      | -0.15 | 6.54E-01 | 1.00E+00 | -0.32 | 4.68E-01 | 9.00E-01 |
| <b>RPP30</b>      | 0.13  | 4.15E-01 | 1.00E+00 | -0.19 | 4.68E-01 | 9.00E-01 |
| <b>G32150</b>     | -0.17 | 9.07E-01 | 1.00E+00 | 0.98  | 4.68E-01 | 9.00E-01 |
| <b>TRPA1</b>      | -0.41 | 8.20E-01 | 1.00E+00 | 0.89  | 4.68E-01 | 9.00E-01 |
| <b>EEF1A1P13</b>  | 0.19  | 6.36E-01 | 1.00E+00 | -0.30 | 4.68E-01 | 9.00E-01 |
| <b>GATAD2B</b>    | -0.10 | 6.85E-01 | 1.00E+00 | 0.20  | 4.68E-01 | 9.00E-01 |
| <b>CBWD4P</b>     | -0.44 | 8.26E-01 | 1.00E+00 | -0.71 | 4.68E-01 | 9.00E-01 |
| <b>GNPTG</b>      | -0.01 | 9.77E-01 | 1.00E+00 | 0.13  | 4.69E-01 | 9.00E-01 |
| <b>PLEKHA7</b>    | -0.02 | 9.40E-01 | 1.00E+00 | 0.36  | 4.69E-01 | 9.00E-01 |
| <b>G11194</b>     | 0.14  | 8.57E-01 | 1.00E+00 | -0.83 | 4.69E-01 | 9.00E-01 |
| <b>CD300E</b>     | -0.12 | 8.46E-01 | 1.00E+00 | 2.27  | 4.69E-01 | 9.00E-01 |
| <b>ZNF862</b>     | -0.09 | 7.03E-01 | 1.00E+00 | 0.21  | 4.69E-01 | 9.00E-01 |
| <b>LINC02587</b>  | 1.60  | 2.27E-01 | 1.00E+00 | -0.58 | 4.69E-01 | 9.00E-01 |
| <b>TNFRSF18</b>   | -0.68 | 6.62E-02 | 1.00E+00 | -0.37 | 4.69E-01 | 9.00E-01 |
| <b>AC010342.1</b> | 2.05  | 4.12E-01 | 1.00E+00 | -0.45 | 4.69E-01 | 9.00E-01 |
| <b>CYP2U1</b>     | 0.48  | 2.54E-01 | 1.00E+00 | -0.38 | 4.69E-01 | 9.00E-01 |

|                   |       |          |          |       |          |          |
|-------------------|-------|----------|----------|-------|----------|----------|
| <b>PITRM1-AS1</b> | -1.72 | 2.18E-01 | 1.00E+00 | -0.79 | 4.69E-01 | 9.00E-01 |
| <b>DRD2</b>       | 0.03  | 9.66E-01 | 1.00E+00 | -0.97 | 4.69E-01 | 9.00E-01 |
| <b>AL513320.1</b> | -2.47 | 1.98E-01 | 1.00E+00 | 1.13  | 4.69E-01 | 9.00E-01 |
| <b>OR2W3</b>      | 1.17  | 2.82E-01 | 1.00E+00 | -0.76 | 4.69E-01 | 9.00E-01 |
| <b>TTYH2</b>      | -0.26 | 3.73E-01 | 1.00E+00 | 0.41  | 4.69E-01 | 9.00E-01 |
| <b>AC012498.2</b> | -4.37 | 4.53E-02 | 1.00E+00 | 0.77  | 4.69E-01 | 9.00E-01 |
| <b>AC022167.2</b> | 0.26  | 8.18E-01 | 1.00E+00 | 0.64  | 4.69E-01 | 9.00E-01 |
| <b>SLC22A1</b>    | 0.70  | 5.40E-01 | 1.00E+00 | 1.01  | 4.69E-01 | 9.00E-01 |
| <b>LINC02328</b>  | -1.01 | 3.40E-01 | 1.00E+00 | 0.83  | 4.69E-01 | 9.00E-01 |
| <b>MED20</b>      | 0.10  | 7.20E-01 | 1.00E+00 | -0.21 | 4.69E-01 | 9.00E-01 |
| <b>FGF16</b>      | 2.35  | 1.82E-01 | 1.00E+00 | 1.00  | 4.69E-01 | 9.00E-01 |
| <b>DDR GK1</b>    | 0.00  | 9.96E-01 | 1.00E+00 | 0.29  | 4.69E-01 | 9.00E-01 |
| <b>VIRMA</b>      | 0.18  | 2.34E-01 | 1.00E+00 | 0.12  | 4.70E-01 | 9.00E-01 |
| <b>WDR47</b>      | 0.01  | 9.74E-01 | 1.00E+00 | -0.25 | 4.70E-01 | 9.00E-01 |
| <b>C5orf15</b>    | 0.18  | 3.61E-01 | 1.00E+00 | -0.17 | 4.70E-01 | 9.00E-01 |
| <b>FTH1P23</b>    | -0.05 | 9.89E-01 | 1.00E+00 | -0.43 | 4.70E-01 | 9.00E-01 |
| <b>AC018645.2</b> | -0.05 | 8.97E-01 | 1.00E+00 | 0.37  | 4.70E-01 | 9.00E-01 |
| <b>ZWINT</b>      | -0.31 | 2.95E-01 | 1.00E+00 | 0.26  | 4.70E-01 | 9.00E-01 |
| <b>ANKS3</b>      | 0.07  | 8.57E-01 | 1.00E+00 | 0.40  | 4.70E-01 | 9.00E-01 |
| <b>AC026124.1</b> | -1.95 | 4.67E-01 | 1.00E+00 | -1.20 | 4.70E-01 | 9.00E-01 |
| <b>AC010967.1</b> | 0.78  | 8.19E-01 | 1.00E+00 | 0.98  | 4.70E-01 | 9.00E-01 |
| <b>LINC00211</b>  | -0.06 | 9.63E-01 | 1.00E+00 | 0.87  | 4.70E-01 | 9.00E-01 |
| <b>ADAM19</b>     | 0.11  | 8.53E-01 | 1.00E+00 | 2.25  | 4.70E-01 | 9.00E-01 |
| <b>LHFPL4</b>     | -4.14 | 3.63E-05 | 9.90E-03 | -0.82 | 4.70E-01 | 9.00E-01 |
| <b>SERHL</b>      | 0.78  | 2.80E-01 | 1.00E+00 | 0.68  | 4.70E-01 | 9.00E-01 |
| <b>TRIM26</b>     | -0.33 | 1.78E-01 | 1.00E+00 | 0.31  | 4.70E-01 | 9.00E-01 |
| <b>AC091946.1</b> | -4.71 | 6.17E-04 | 1.17E-01 | 0.64  | 4.70E-01 | 9.00E-01 |
| <b>BTRC</b>       | 0.09  | 6.44E-01 | 1.00E+00 | 0.16  | 4.70E-01 | 9.00E-01 |
| <b>ENSA</b>       | 0.03  | 9.12E-01 | 1.00E+00 | 0.12  | 4.70E-01 | 9.00E-01 |
| <b>MRTO4</b>      | -0.26 | 3.13E-01 | 1.00E+00 | 0.15  | 4.70E-01 | 9.00E-01 |
| <b>FAM49A</b>     | -0.01 | 9.86E-01 | 1.00E+00 | 0.37  | 4.70E-01 | 9.00E-01 |
| <b>COPS3</b>      | 0.14  | 3.68E-01 | 1.00E+00 | -0.13 | 4.70E-01 | 9.00E-01 |

|            |       |          |          |       |          |          |
|------------|-------|----------|----------|-------|----------|----------|
| KCTD1      | -0.29 | 2.79E-01 | 1.00E+00 | -0.31 | 4.70E-01 | 9.00E-01 |
| LIG4       | -0.23 | 4.92E-01 | 1.00E+00 | -0.18 | 4.70E-01 | 9.00E-01 |
| SNU13      | 0.04  | 8.17E-01 | 1.00E+00 | -0.15 | 4.70E-01 | 9.00E-01 |
| BTD        | 0.46  | 2.36E-01 | 1.00E+00 | -0.26 | 4.70E-01 | 9.00E-01 |
| SCLY       | -0.13 | 9.19E-01 | 1.00E+00 | -0.37 | 4.71E-01 | 9.00E-01 |
| AMY2B      | -0.28 | 6.31E-01 | 1.00E+00 | -0.56 | 4.71E-01 | 9.00E-01 |
| SMC4       | 0.26  | 3.79E-01 | 1.00E+00 | -0.16 | 4.71E-01 | 9.00E-01 |
| AL121672.1 | -3.08 | 1.88E-02 | 8.62E-01 | -0.59 | 4.71E-01 | 9.00E-01 |
| AL163051.1 | 0.40  | 5.80E-01 | 1.00E+00 | -0.41 | 4.71E-01 | 9.00E-01 |
| ANGEL2     | 0.38  | 2.49E-01 | 1.00E+00 | -0.16 | 4.71E-01 | 9.00E-01 |
| TDRKH-AS1  | -1.92 | 5.74E-01 | 1.00E+00 | -0.68 | 4.71E-01 | 9.00E-01 |
| FBH1       | -0.11 | 5.59E-01 | 1.00E+00 | -0.37 | 4.71E-01 | 9.00E-01 |
| DND1P1     | -1.64 | 5.84E-02 | 1.00E+00 | 0.40  | 4.71E-01 | 9.00E-01 |
| SMIM31     | 0.89  | 6.18E-01 | 1.00E+00 | -1.38 | 4.71E-01 | 9.00E-01 |
| NHLRC3     | 0.64  | 1.11E-01 | 1.00E+00 | 0.26  | 4.71E-01 | 9.00E-01 |
| LONRF2     | -0.11 | 8.50E-01 | 1.00E+00 | -0.55 | 4.71E-01 | 9.00E-01 |
| ZNF594     | -0.17 | 7.02E-01 | 1.00E+00 | 0.48  | 4.71E-01 | 9.00E-01 |
| ZNF706     | -0.01 | 9.63E-01 | 1.00E+00 | -0.31 | 4.71E-01 | 9.00E-01 |
| AL031320.2 | 0.38  | 7.65E-01 | 1.00E+00 | 0.41  | 4.71E-01 | 9.00E-01 |
| AC020898.1 | 0.71  | 6.93E-01 | 1.00E+00 | -0.41 | 4.71E-01 | 9.00E-01 |
| INTS8      | 0.16  | 4.63E-01 | 1.00E+00 | -0.26 | 4.71E-01 | 9.00E-01 |
| AF250324.1 | -0.74 | 6.92E-01 | 1.00E+00 | 1.17  | 4.71E-01 | 9.00E-01 |
| AL359091.4 | -0.99 | 3.35E-01 | 1.00E+00 | 0.80  | 4.71E-01 | 9.00E-01 |
| 6-Mar      | 0.20  | 2.97E-01 | 1.00E+00 | -0.24 | 4.71E-01 | 9.00E-01 |
| NUBPL      | -0.10 | 6.82E-01 | 1.00E+00 | -0.27 | 4.71E-01 | 9.00E-01 |
| TENT4A     | 0.11  | 7.07E-01 | 1.00E+00 | 0.34  | 4.71E-01 | 9.00E-01 |
| SOX10      | -0.18 | 7.27E-01 | 1.00E+00 | 0.45  | 4.71E-01 | 9.00E-01 |
| CYTL1      | 1.32  | 4.34E-02 | 1.00E+00 | 0.44  | 4.71E-01 | 9.00E-01 |
| CNTN2      | -0.30 | 5.44E-01 | 1.00E+00 | -1.62 | 4.71E-01 | 9.00E-01 |
| AC060780.1 | -0.21 | 5.55E-01 | 1.00E+00 | -0.24 | 4.72E-01 | 9.00E-01 |
| SLC10A5    | 1.25  | 1.44E-01 | 1.00E+00 | -0.85 | 4.72E-01 | 9.00E-01 |
| AC010978.1 | -3.61 | 8.51E-02 | 1.00E+00 | 0.77  | 4.72E-01 | 9.00E-01 |

|                   |       |          |          |       |          |          |
|-------------------|-------|----------|----------|-------|----------|----------|
| <b>UGGT1</b>      | 0.08  | 7.15E-01 | 1.00E+00 | 0.25  | 4.72E-01 | 9.00E-01 |
| <b>AC115837.1</b> | 0.38  | 7.66E-01 | 1.00E+00 | 0.38  | 4.72E-01 | 9.00E-01 |
| <b>SCARF1</b>     | 0.21  | 6.00E-01 | 1.00E+00 | 0.56  | 4.72E-01 | 9.00E-01 |
| <b>ATP6V1A</b>    | 0.03  | 8.94E-01 | 1.00E+00 | -0.15 | 4.72E-01 | 9.00E-01 |
| <b>TEAD4</b>      | 0.02  | 9.50E-01 | 1.00E+00 | 0.25  | 4.72E-01 | 9.00E-01 |
| <b>ERP29</b>      | 0.00  | 9.86E-01 | 1.00E+00 | 0.12  | 4.72E-01 | 9.00E-01 |
| <b>PROCR</b>      | 0.39  | 3.26E-01 | 1.00E+00 | 0.25  | 4.72E-01 | 9.00E-01 |
| <b>MAGEA11</b>    | -0.12 | 9.73E-01 | 1.00E+00 | -1.77 | 4.72E-01 | 9.00E-01 |
| <b>CACNA2D4</b>   | 0.09  | 7.85E-01 | 1.00E+00 | 0.42  | 4.72E-01 | 9.00E-01 |
| <b>CAPNS1</b>     | 0.03  | 9.46E-01 | 1.00E+00 | 0.39  | 4.72E-01 | 9.00E-01 |
| <b>AL109976.1</b> | -0.79 | 1.24E-01 | 1.00E+00 | 0.46  | 4.72E-01 | 9.00E-01 |
| <b>LINC01480</b>  | NA    | NA       | NA       | 0.87  | 4.72E-01 | 9.00E-01 |
| <b>STX18</b>      | 0.14  | 3.74E-01 | 1.00E+00 | 0.13  | 4.72E-01 | 9.00E-01 |
| <b>PCSK5</b>      | 0.59  | 1.25E-01 | 1.00E+00 | 0.39  | 4.72E-01 | 9.00E-01 |
| <b>IFT22</b>      | -0.20 | 4.63E-01 | 1.00E+00 | -0.16 | 4.72E-01 | 9.00E-01 |
| <b>LINC01550</b>  | -0.12 | 7.17E-01 | 1.00E+00 | -0.38 | 4.72E-01 | 9.00E-01 |
| <b>TMTC3</b>      | -0.28 | 4.15E-01 | 1.00E+00 | -0.30 | 4.72E-01 | 9.00E-01 |
| <b>LIN7A</b>      | 0.26  | 5.58E-01 | 1.00E+00 | 0.53  | 4.72E-01 | 9.00E-01 |
| <b>IGHD</b>       | 2.48  | 4.89E-02 | 1.00E+00 | 2.27  | 4.72E-01 | 9.00E-01 |
| <b>MED13L</b>     | -0.15 | 4.81E-01 | 1.00E+00 | 0.25  | 4.72E-01 | 9.00E-01 |
| <b>AP005230.1</b> | -0.56 | 8.73E-01 | 1.00E+00 | 1.34  | 4.72E-01 | 9.00E-01 |
| <b>AK9</b>        | 0.04  | 8.67E-01 | 1.00E+00 | -0.25 | 4.72E-01 | 9.00E-01 |
| <b>G21027</b>     | 0.15  | 8.91E-01 | 1.00E+00 | 0.61  | 4.73E-01 | 9.00E-01 |
| <b>MTX2</b>       | 0.11  | 6.03E-01 | 1.00E+00 | -0.18 | 4.73E-01 | 9.00E-01 |
| <b>MYMX</b>       | 2.04  | 4.19E-02 | 1.00E+00 | -0.63 | 4.73E-01 | 9.00E-01 |
| <b>TUBGCP3</b>    | 0.21  | 3.50E-01 | 1.00E+00 | 0.24  | 4.73E-01 | 9.00E-01 |
| <b>AL513343.1</b> | 0.44  | 7.59E-01 | 1.00E+00 | 0.95  | 4.73E-01 | 9.00E-01 |
| <b>GBF1</b>       | -0.29 | 8.66E-02 | 1.00E+00 | 0.29  | 4.73E-01 | 9.00E-01 |
| <b>LSM4</b>       | -0.12 | 4.86E-01 | 1.00E+00 | -0.16 | 4.73E-01 | 9.00E-01 |
| <b>ENTPD6</b>     | 0.11  | 8.12E-01 | 1.00E+00 | 0.33  | 4.73E-01 | 9.00E-01 |
| <b>C5orf66</b>    | -0.57 | 7.80E-01 | 1.00E+00 | 0.56  | 4.73E-01 | 9.00E-01 |
| <b>UCHL3</b>      | -0.64 | 4.83E-01 | 1.00E+00 | -0.54 | 4.73E-01 | 9.00E-01 |

|             |       |          |          |       |          |          |
|-------------|-------|----------|----------|-------|----------|----------|
| LGMNP1      | NA    | NA       | NA       | 0.65  | 4.73E-01 | 9.00E-01 |
| CHAC1       | -0.71 | 3.37E-01 | 1.00E+00 | 0.50  | 4.73E-01 | 9.00E-01 |
| HGS         | -0.32 | 1.60E-01 | 1.00E+00 | 0.21  | 4.73E-01 | 9.00E-01 |
| YWHAZP3     | -0.46 | 6.37E-01 | 1.00E+00 | -0.33 | 4.73E-01 | 9.00E-01 |
| TMEM53      | 0.28  | 3.97E-01 | 1.00E+00 | -0.19 | 4.73E-01 | 9.00E-01 |
| SETDB1      | -0.24 | 4.09E-01 | 1.00E+00 | 0.23  | 4.73E-01 | 9.00E-01 |
| PLCH2       | -0.70 | 1.22E-01 | 1.00E+00 | -0.58 | 4.73E-01 | 9.00E-01 |
| AC012640.4  | -0.51 | 8.61E-01 | 1.00E+00 | 1.25  | 4.73E-01 | 9.00E-01 |
| PXN-AS1     | -0.53 | 3.42E-01 | 1.00E+00 | -0.42 | 4.73E-01 | 9.00E-01 |
| TUBGCP5     | -0.02 | 9.32E-01 | 1.00E+00 | -0.15 | 4.73E-01 | 9.00E-01 |
| AC005005.3  | 1.90  | 5.75E-01 | 1.00E+00 | -0.86 | 4.73E-01 | 9.00E-01 |
| ROPN1L      | -1.21 | 3.33E-01 | 1.00E+00 | -0.62 | 4.73E-01 | 9.00E-01 |
| DPH5        | -0.15 | 6.42E-01 | 1.00E+00 | -0.19 | 4.73E-01 | 9.00E-01 |
| TMEM184A    | -0.36 | 4.65E-01 | 1.00E+00 | 0.59  | 4.73E-01 | 9.00E-01 |
| XLOC_013940 | -1.75 | 6.03E-01 | 1.00E+00 | -0.88 | 4.73E-01 | 9.00E-01 |
| UST         | 0.43  | 6.38E-02 | 1.00E+00 | -0.23 | 4.73E-01 | 9.00E-01 |
| LMNTD2      | -0.35 | 4.51E-01 | 1.00E+00 | -0.79 | 4.73E-01 | 9.00E-01 |
| ERVK13-1    | -0.23 | 5.41E-01 | 1.00E+00 | 0.27  | 4.74E-01 | 9.00E-01 |
| TMEM63B     | -0.11 | 7.37E-01 | 1.00E+00 | 0.36  | 4.74E-01 | 9.00E-01 |
| VEZT        | 0.09  | 6.96E-01 | 1.00E+00 | 0.12  | 4.74E-01 | 9.00E-01 |
| TUBA4A      | -0.07 | 8.64E-01 | 1.00E+00 | 0.30  | 4.74E-01 | 9.00E-01 |
| HNRNPC      | -0.06 | 7.37E-01 | 1.00E+00 | 0.06  | 4.74E-01 | 9.00E-01 |
| SERP1       | 0.28  | 1.38E-01 | 1.00E+00 | -0.16 | 4.74E-01 | 9.00E-01 |
| LRRC77P     | 2.45  | 6.93E-02 | 1.00E+00 | -1.14 | 4.74E-01 | 9.00E-01 |
| PGD         | 0.02  | 9.37E-01 | 1.00E+00 | 0.26  | 4.74E-01 | 9.00E-01 |
| PDCL        | 0.16  | 4.20E-01 | 1.00E+00 | -0.13 | 4.74E-01 | 9.00E-01 |
| ERGIC2      | 0.02  | 9.52E-01 | 1.00E+00 | -0.26 | 4.74E-01 | 9.00E-01 |
| SLC35A3     | 0.53  | 1.69E-01 | 1.00E+00 | -0.20 | 4.74E-01 | 9.00E-01 |
| BRCA2       | -0.29 | 5.40E-01 | 1.00E+00 | 0.27  | 4.74E-01 | 9.00E-01 |
| AC048341.1  | 0.27  | 5.67E-01 | 1.00E+00 | 0.51  | 4.74E-01 | 9.00E-01 |
| AC096667.1  | -1.58 | 5.99E-01 | 1.00E+00 | 1.20  | 4.74E-01 | 9.01E-01 |
| SPARC       | 0.16  | 8.07E-01 | 1.00E+00 | 0.37  | 4.74E-01 | 9.01E-01 |



|                    |       |          |          |       |          |          |
|--------------------|-------|----------|----------|-------|----------|----------|
| <b>EPHA6</b>       | 0.60  | 4.28E-01 | 1.00E+00 | 0.81  | 4.74E-01 | 9.01E-01 |
| <b>FAM209A</b>     | 0.24  | 9.45E-01 | 1.00E+00 | 1.16  | 4.74E-01 | 9.01E-01 |
| <b>HRAS</b>        | -0.37 | 2.46E-01 | 1.00E+00 | -0.28 | 4.74E-01 | 9.01E-01 |
| <b>SLC6A13</b>     | -0.76 | 6.12E-01 | 1.00E+00 | 0.78  | 4.74E-01 | 9.01E-01 |
| <b>IL36RN</b>      | 0.16  | 8.18E-01 | 1.00E+00 | 0.57  | 4.74E-01 | 9.01E-01 |
| <b>FBXL13</b>      | -0.20 | 7.75E-01 | 1.00E+00 | 0.41  | 4.74E-01 | 9.01E-01 |
| <b>AC121761.1</b>  | -0.42 | 3.37E-01 | 1.00E+00 | 0.47  | 4.74E-01 | 9.01E-01 |
| <b>FUT8</b>        | 0.13  | 7.11E-01 | 1.00E+00 | 0.19  | 4.74E-01 | 9.01E-01 |
| <b>SLC2A8</b>      | -0.04 | 8.95E-01 | 1.00E+00 | -0.24 | 4.74E-01 | 9.01E-01 |
| <b>TMPRSS12</b>    | 0.49  | 7.08E-01 | 1.00E+00 | 0.62  | 4.74E-01 | 9.01E-01 |
| <b>SELE</b>        | -2.35 | 6.35E-02 | 1.00E+00 | 2.24  | 4.74E-01 | 9.01E-01 |
| <b>HNRNPA1P7</b>   | 0.94  | 7.83E-01 | 1.00E+00 | -0.50 | 4.74E-01 | 9.01E-01 |
| <b>C11orf21</b>    | 0.02  | 9.85E-01 | 1.00E+00 | 0.76  | 4.74E-01 | 9.01E-01 |
| <b>ABCC12</b>      | -4.09 | 1.15E-01 | 1.00E+00 | -1.25 | 4.75E-01 | 9.01E-01 |
| <b>ZFAND6</b>      | 0.34  | 1.06E-01 | 1.00E+00 | -0.22 | 4.75E-01 | 9.01E-01 |
| <b>SPRR2D</b>      | -0.79 | 3.43E-01 | 1.00E+00 | 2.24  | 4.75E-01 | 9.01E-01 |
| <b>USP9X</b>       | 0.15  | 3.92E-01 | 1.00E+00 | 0.21  | 4.75E-01 | 9.01E-01 |
| <b>LINC01634</b>   | -3.07 | 1.15E-01 | 1.00E+00 | 1.04  | 4.75E-01 | 9.01E-01 |
| <b>ARHGAP5-AS1</b> | 0.38  | 3.16E-01 | 1.00E+00 | -0.33 | 4.75E-01 | 9.01E-01 |
| <b>TCHH</b>        | -7.27 | 1.31E-06 | 4.82E-04 | -0.79 | 4.75E-01 | 9.01E-01 |
| <b>AL590764.1</b>  | 0.79  | 5.43E-01 | 1.00E+00 | 0.82  | 4.75E-01 | 9.01E-01 |
| <b>KRT12</b>       | 0.61  | 5.91E-01 | 1.00E+00 | 0.81  | 4.75E-01 | 9.01E-01 |
| <b>SETD5</b>       | 0.00  | 9.84E-01 | 1.00E+00 | 0.27  | 4.75E-01 | 9.01E-01 |
| <b>STARD13</b>     | 0.34  | 3.87E-01 | 1.00E+00 | 0.38  | 4.75E-01 | 9.01E-01 |
| <b>AC009120.2</b>  | -2.67 | 8.98E-02 | 1.00E+00 | -0.42 | 4.75E-01 | 9.01E-01 |
| <b>AC018629.1</b>  | -0.76 | 9.07E-02 | 1.00E+00 | 0.47  | 4.75E-01 | 9.01E-01 |
| <b>ST6GAL1</b>     | 0.42  | 3.91E-01 | 1.00E+00 | 0.31  | 4.75E-01 | 9.01E-01 |
| <b>ITPKC</b>       | -0.52 | 2.30E-01 | 1.00E+00 | -0.38 | 4.75E-01 | 9.01E-01 |
| <b>FGFBP2</b>      | 1.02  | 1.45E-01 | 1.00E+00 | -0.32 | 4.75E-01 | 9.01E-01 |
| <b>ZBTB41</b>      | 0.09  | 8.20E-01 | 1.00E+00 | -0.24 | 4.75E-01 | 9.01E-01 |
| <b>TECTA</b>       | 1.14  | 1.15E-01 | 1.00E+00 | 0.88  | 4.75E-01 | 9.01E-01 |
| <b>CLEC4E</b>      | -1.38 | 3.51E-02 | 1.00E+00 | 2.24  | 4.75E-01 | 9.01E-01 |

|                   |       |          |          |       |          |          |
|-------------------|-------|----------|----------|-------|----------|----------|
| <b>ARID3B</b>     | -0.73 | 5.66E-02 | 1.00E+00 | 0.54  | 4.75E-01 | 9.01E-01 |
| <b>GSN</b>        | 0.53  | 1.60E-01 | 1.00E+00 | -0.30 | 4.75E-01 | 9.01E-01 |
| <b>IGHV3-30</b>   | 3.60  | 1.52E-02 | 7.65E-01 | 2.25  | 4.75E-01 | 9.01E-01 |
| <b>DEFB132</b>    | 4.35  | 4.53E-02 | 1.00E+00 | -2.26 | 4.75E-01 | 9.01E-01 |
| <b>NIP7</b>       | -0.03 | 8.95E-01 | 1.00E+00 | 0.12  | 4.75E-01 | 9.01E-01 |
| <b>CEP85</b>      | -0.31 | 3.81E-01 | 1.00E+00 | -0.16 | 4.75E-01 | 9.01E-01 |
| <b>G14802</b>     | 0.32  | 8.26E-01 | 1.00E+00 | 0.95  | 4.76E-01 | 9.01E-01 |
| <b>SERAC1</b>     | 0.24  | 4.77E-01 | 1.00E+00 | -0.16 | 4.76E-01 | 9.01E-01 |
| <b>GOLPH3L</b>    | 0.42  | 1.10E-01 | 1.00E+00 | -0.18 | 4.76E-01 | 9.01E-01 |
| <b>NPIP15</b>     | -0.29 | 6.69E-01 | 1.00E+00 | 0.52  | 4.76E-01 | 9.01E-01 |
| <b>AC093752.1</b> | -0.50 | 1.68E-01 | 1.00E+00 | -0.24 | 4.76E-01 | 9.01E-01 |
| <b>AC139530.1</b> | -0.51 | 2.68E-01 | 1.00E+00 | -0.36 | 4.76E-01 | 9.01E-01 |
| <b>RBM28</b>      | 0.11  | 6.91E-01 | 1.00E+00 | 0.22  | 4.76E-01 | 9.01E-01 |
| <b>RBM45</b>      | -0.21 | 4.12E-01 | 1.00E+00 | 0.18  | 4.76E-01 | 9.01E-01 |
| <b>SNRPG</b>      | -0.09 | 6.37E-01 | 1.00E+00 | -0.28 | 4.76E-01 | 9.01E-01 |
| <b>C21orf58</b>   | -0.14 | 7.55E-01 | 1.00E+00 | 0.37  | 4.76E-01 | 9.01E-01 |
| <b>AC010894.3</b> | 0.18  | 9.56E-01 | 1.00E+00 | 0.98  | 4.76E-01 | 9.01E-01 |
| <b>CADPS</b>      | -0.72 | 3.52E-01 | 1.00E+00 | 0.62  | 4.76E-01 | 9.01E-01 |
| <b>LINC01010</b>  | -1.01 | 3.38E-01 | 1.00E+00 | 0.73  | 4.76E-01 | 9.01E-01 |
| <b>SMC1A</b>      | -0.03 | 8.70E-01 | 1.00E+00 | 0.22  | 4.76E-01 | 9.01E-01 |
| <b>CARD11</b>     | -0.52 | 4.37E-01 | 1.00E+00 | 2.24  | 4.76E-01 | 9.01E-01 |
| <b>AL353796.1</b> | 0.43  | 5.46E-01 | 1.00E+00 | -0.62 | 4.76E-01 | 9.01E-01 |
| <b>CALHM5</b>     | 0.80  | 2.05E-01 | 1.00E+00 | -0.44 | 4.76E-01 | 9.01E-01 |
| <b>RSRC2</b>      | 0.08  | 7.39E-01 | 1.00E+00 | -0.13 | 4.76E-01 | 9.01E-01 |
| <b>AL133338.1</b> | -0.24 | 5.50E-01 | 1.00E+00 | -0.40 | 4.76E-01 | 9.01E-01 |
| <b>NBN</b>        | 0.14  | 5.74E-01 | 1.00E+00 | -0.13 | 4.76E-01 | 9.01E-01 |
| <b>RAD21</b>      | 0.11  | 6.21E-01 | 1.00E+00 | 0.12  | 4.76E-01 | 9.01E-01 |
| <b>RPGRIP1</b>    | -1.28 | 1.28E-01 | 1.00E+00 | 0.41  | 4.76E-01 | 9.01E-01 |
| <b>KRT33A</b>     | -2.51 | 4.52E-01 | 1.00E+00 | 1.14  | 4.76E-01 | 9.01E-01 |
| <b>EIF1</b>       | -0.11 | 5.45E-01 | 1.00E+00 | -0.15 | 4.76E-01 | 9.01E-01 |
| <b>ENTPD3-AS1</b> | 0.59  | 1.47E-01 | 1.00E+00 | -0.36 | 4.76E-01 | 9.01E-01 |
| <b>ZNF630</b>     | 0.10  | 8.37E-01 | 1.00E+00 | -0.32 | 4.76E-01 | 9.01E-01 |

|                   |       |          |          |       |          |          |
|-------------------|-------|----------|----------|-------|----------|----------|
| <b>SNIP1</b>      | 0.09  | 6.03E-01 | 1.00E+00 | 0.28  | 4.76E-01 | 9.01E-01 |
| <b>AC068587.4</b> | -1.04 | 4.26E-02 | 1.00E+00 | -0.33 | 4.76E-01 | 9.01E-01 |
| <b>TPBG</b>       | -0.29 | 3.26E-01 | 1.00E+00 | 0.37  | 4.77E-01 | 9.01E-01 |
| <b>AL445305.1</b> | 0.88  | 7.98E-01 | 1.00E+00 | -0.47 | 4.77E-01 | 9.01E-01 |
| <b>BTN2A1</b>     | 0.08  | 8.14E-01 | 1.00E+00 | 0.31  | 4.77E-01 | 9.01E-01 |
| <b>YKT6</b>       | 0.01  | 9.58E-01 | 1.00E+00 | 0.27  | 4.77E-01 | 9.01E-01 |
| <b>CPVL</b>       | -0.74 | 6.45E-02 | 1.00E+00 | 0.21  | 4.77E-01 | 9.01E-01 |
| <b>AP000676.5</b> | -2.55 | 7.64E-02 | 1.00E+00 | 0.61  | 4.77E-01 | 9.01E-01 |
| <b>FAM149A</b>    | 0.46  | 4.16E-01 | 1.00E+00 | -0.54 | 4.77E-01 | 9.01E-01 |
| <b>ELAVL1</b>     | -0.02 | 8.84E-01 | 1.00E+00 | -0.31 | 4.77E-01 | 9.01E-01 |
| <b>HCG23</b>      | -0.33 | 5.85E-01 | 1.00E+00 | 0.39  | 4.77E-01 | 9.01E-01 |
| <b>SEMA3D</b>     | 0.61  | 1.41E-01 | 1.00E+00 | -0.36 | 4.77E-01 | 9.01E-01 |
| <b>TFCP2</b>      | 0.07  | 6.52E-01 | 1.00E+00 | 0.25  | 4.77E-01 | 9.01E-01 |
| <b>ARRDC2</b>     | 0.15  | 6.35E-01 | 1.00E+00 | 0.48  | 4.77E-01 | 9.01E-01 |
| <b>MTUS2</b>      | -0.52 | 5.73E-01 | 1.00E+00 | -0.65 | 4.77E-01 | 9.01E-01 |
| <b>AC092111.1</b> | -0.75 | 3.67E-01 | 1.00E+00 | 0.77  | 4.77E-01 | 9.01E-01 |
| <b>MBD5</b>       | -0.39 | 6.74E-02 | 1.00E+00 | 0.12  | 4.77E-01 | 9.01E-01 |
| <b>KCNJ13</b>     | 0.42  | 6.57E-01 | 1.00E+00 | -0.55 | 4.77E-01 | 9.01E-01 |
| <b>LINC01273</b>  | -0.07 | 9.66E-01 | 1.00E+00 | -0.92 | 4.77E-01 | 9.01E-01 |
| <b>MAP3K3</b>     | 0.09  | 6.65E-01 | 1.00E+00 | 0.37  | 4.77E-01 | 9.01E-01 |
| <b>ATF1</b>       | 0.34  | 1.77E-01 | 1.00E+00 | -0.16 | 4.77E-01 | 9.01E-01 |
| <b>TMEM99</b>     | -0.04 | 9.42E-01 | 1.00E+00 | -0.37 | 4.77E-01 | 9.01E-01 |
| <b>ZFP69B</b>     | -0.98 | 1.99E-02 | 8.80E-01 | 0.38  | 4.77E-01 | 9.01E-01 |
| <b>SIT1</b>       | -0.19 | 7.29E-01 | 1.00E+00 | 0.58  | 4.77E-01 | 9.01E-01 |
| <b>AL354702.1</b> | -1.48 | 2.32E-01 | 1.00E+00 | -0.34 | 4.78E-01 | 9.01E-01 |
| <b>AC145138.1</b> | 0.59  | 6.09E-01 | 1.00E+00 | 0.58  | 4.78E-01 | 9.01E-01 |
| <b>ZC3H13</b>     | -0.02 | 9.25E-01 | 1.00E+00 | 0.13  | 4.78E-01 | 9.01E-01 |
| <b>U2AF1L4</b>    | -0.33 | 7.47E-01 | 1.00E+00 | 0.30  | 4.78E-01 | 9.01E-01 |
| <b>MIR503HG</b>   | -2.01 | 5.50E-01 | 1.00E+00 | 1.15  | 4.78E-01 | 9.01E-01 |
| <b>AL691432.1</b> | 0.93  | 5.05E-01 | 1.00E+00 | 0.88  | 4.78E-01 | 9.01E-01 |
| <b>AC104825.1</b> | 0.37  | 3.56E-01 | 1.00E+00 | -0.31 | 4.78E-01 | 9.01E-01 |
| <b>SHCBP1</b>     | 0.05  | 8.94E-01 | 1.00E+00 | 0.35  | 4.78E-01 | 9.01E-01 |

|                    |       |          |          |       |          |          |
|--------------------|-------|----------|----------|-------|----------|----------|
| <b>NTF3</b>        | 0.06  | 8.91E-01 | 1.00E+00 | -0.24 | 4.78E-01 | 9.01E-01 |
| <b>PPP1R12A</b>    | 0.14  | 5.44E-01 | 1.00E+00 | -0.15 | 4.78E-01 | 9.01E-01 |
| <b>G26815</b>      | -0.99 | 4.65E-01 | 1.00E+00 | 1.01  | 4.78E-01 | 9.01E-01 |
| <b>NDRG3</b>       | -0.14 | 5.56E-01 | 1.00E+00 | -0.22 | 4.78E-01 | 9.01E-01 |
| <b>AL136298.3</b>  | -0.31 | 9.01E-01 | 1.00E+00 | -0.40 | 4.78E-01 | 9.01E-01 |
| <b>MCM7</b>        | -0.09 | 5.80E-01 | 1.00E+00 | 0.20  | 4.78E-01 | 9.01E-01 |
| <b>ETFB</b>        | 0.26  | 5.23E-01 | 1.00E+00 | -0.32 | 4.78E-01 | 9.01E-01 |
| <b>STX11</b>       | -0.11 | 8.12E-01 | 1.00E+00 | 0.32  | 4.78E-01 | 9.01E-01 |
| <b>ROCK1</b>       | -0.01 | 9.70E-01 | 1.00E+00 | 0.17  | 4.78E-01 | 9.01E-01 |
| <b>CCNY</b>        | 0.21  | 1.92E-01 | 1.00E+00 | -0.26 | 4.78E-01 | 9.01E-01 |
| <b>ELN</b>         | -0.06 | 9.25E-01 | 1.00E+00 | 0.48  | 4.78E-01 | 9.01E-01 |
| <b>AC119396.2</b>  | -1.94 | 4.01E-01 | 1.00E+00 | 0.67  | 4.78E-01 | 9.01E-01 |
| <b>RNU5F-1</b>     | 2.23  | 5.07E-01 | 1.00E+00 | -0.75 | 4.78E-01 | 9.01E-01 |
| <b>DGCR9</b>       | -1.58 | 1.98E-01 | 1.00E+00 | 0.96  | 4.78E-01 | 9.01E-01 |
| <b>SLC35E1</b>     | 0.08  | 6.53E-01 | 1.00E+00 | 0.18  | 4.78E-01 | 9.01E-01 |
| <b>G11854</b>      | 2.01  | 2.67E-01 | 1.00E+00 | -0.75 | 4.79E-01 | 9.01E-01 |
| <b>RIMKLA</b>      | -0.14 | 8.56E-01 | 1.00E+00 | -0.68 | 4.79E-01 | 9.01E-01 |
| <b>KIF21A</b>      | 0.32  | 3.17E-01 | 1.00E+00 | -0.23 | 4.79E-01 | 9.01E-01 |
| <b>OXCT1</b>       | 0.02  | 9.41E-01 | 1.00E+00 | -0.13 | 4.79E-01 | 9.01E-01 |
| <b>EMBP1</b>       | -0.02 | 9.85E-01 | 1.00E+00 | 0.31  | 4.79E-01 | 9.01E-01 |
| <b>AC025287.2</b>  | 1.84  | 2.14E-01 | 1.00E+00 | 0.62  | 4.79E-01 | 9.01E-01 |
| <b>MYH3</b>        | -1.37 | 1.99E-02 | 8.80E-01 | -0.44 | 4.79E-01 | 9.01E-01 |
| <b>C12orf43</b>    | -0.02 | 9.28E-01 | 1.00E+00 | 0.24  | 4.79E-01 | 9.01E-01 |
| <b>MIR222HG</b>    | -0.48 | 7.59E-01 | 1.00E+00 | 0.57  | 4.79E-01 | 9.01E-01 |
| <b>XLOC_004197</b> | -3.39 | 1.23E-01 | 1.00E+00 | 1.28  | 4.79E-01 | 9.01E-01 |
| <b>SUSD5</b>       | -0.03 | 9.45E-01 | 1.00E+00 | -0.49 | 4.79E-01 | 9.01E-01 |
| <b>PSMA7</b>       | 0.20  | 2.59E-01 | 1.00E+00 | -0.15 | 4.79E-01 | 9.01E-01 |
| <b>SDHA</b>        | 0.06  | 8.19E-01 | 1.00E+00 | -0.13 | 4.79E-01 | 9.01E-01 |
| <b>G38115</b>      | -0.01 | 9.91E-01 | 1.00E+00 | 0.46  | 4.79E-01 | 9.01E-01 |
| <b>OLMALINC</b>    | 0.15  | 7.76E-01 | 1.00E+00 | -0.28 | 4.79E-01 | 9.02E-01 |
| <b>SLC6A8</b>      | -0.13 | 6.36E-01 | 1.00E+00 | -0.34 | 4.79E-01 | 9.02E-01 |
| <b>G30345</b>      | 0.27  | 7.27E-01 | 1.00E+00 | 0.65  | 4.79E-01 | 9.02E-01 |

|                        |       |          |          |       |          |          |
|------------------------|-------|----------|----------|-------|----------|----------|
| <b>SRSF3</b>           | 0.01  | 9.81E-01 | 1.00E+00 | -0.09 | 4.79E-01 | 9.02E-01 |
| <b>ZNF444</b>          | -0.06 | 8.38E-01 | 1.00E+00 | 0.47  | 4.79E-01 | 9.02E-01 |
| <b>RAB3IL1</b>         | -0.12 | 7.99E-01 | 1.00E+00 | 0.47  | 4.79E-01 | 9.02E-01 |
| <b>AGAP8</b>           | -3.26 | 3.17E-02 | 1.00E+00 | 0.69  | 4.79E-01 | 9.02E-01 |
| <b>PBDC1</b>           | 0.06  | 8.01E-01 | 1.00E+00 | -0.19 | 4.79E-01 | 9.02E-01 |
| <b>MEGF11</b>          | 0.07  | 9.28E-01 | 1.00E+00 | -0.63 | 4.79E-01 | 9.02E-01 |
| <b>GBP5</b>            | -0.77 | 2.22E-01 | 1.00E+00 | 2.21  | 4.80E-01 | 9.02E-01 |
| <b>MLH3</b>            | 0.19  | 5.41E-01 | 1.00E+00 | 0.30  | 4.80E-01 | 9.02E-01 |
| <b>AC105429.1</b>      | -0.10 | 9.37E-01 | 1.00E+00 | 0.89  | 4.80E-01 | 9.02E-01 |
| <b>ANKHD1-EIF4EBP3</b> | -2.78 | 3.60E-02 | 1.00E+00 | 0.44  | 4.80E-01 | 9.02E-01 |
| <b>XLOC_007524</b>     | 0.56  | 5.14E-01 | 1.00E+00 | 0.65  | 4.80E-01 | 9.02E-01 |
| <b>CYSLTR2</b>         | 0.32  | 4.85E-01 | 1.00E+00 | 0.57  | 4.80E-01 | 9.02E-01 |
| <b>ZNF350</b>          | 0.28  | 1.81E-01 | 1.00E+00 | -0.16 | 4.80E-01 | 9.02E-01 |
| <b>RPS18P12</b>        | -0.08 | 9.65E-01 | 1.00E+00 | 0.77  | 4.80E-01 | 9.02E-01 |
| <b>AC124944.3</b>      | -1.09 | 3.37E-01 | 1.00E+00 | 0.50  | 4.80E-01 | 9.02E-01 |
| <b>SHROOM1</b>         | 0.08  | 8.62E-01 | 1.00E+00 | 0.57  | 4.80E-01 | 9.02E-01 |
| <b>ANO10</b>           | -0.06 | 8.09E-01 | 1.00E+00 | -0.13 | 4.80E-01 | 9.02E-01 |
| <b>MAD2L1</b>          | 0.09  | 8.25E-01 | 1.00E+00 | 0.25  | 4.80E-01 | 9.02E-01 |
| <b>AL590648.3</b>      | -2.74 | 2.09E-01 | 1.00E+00 | 0.92  | 4.80E-01 | 9.02E-01 |
| <b>AC145422.1</b>      | -2.22 | 2.80E-01 | 1.00E+00 | -0.60 | 4.80E-01 | 9.02E-01 |
| <b>AL161668.3</b>      | -1.15 | 3.52E-01 | 1.00E+00 | -0.64 | 4.80E-01 | 9.02E-01 |
| <b>AL391001.1</b>      | 0.30  | 8.17E-01 | 1.00E+00 | -0.39 | 4.80E-01 | 9.02E-01 |
| <b>AC008736.1</b>      | -0.53 | 2.58E-01 | 1.00E+00 | -0.53 | 4.80E-01 | 9.02E-01 |
| <b>PRR36</b>           | -1.18 | 3.38E-02 | 1.00E+00 | -0.61 | 4.80E-01 | 9.02E-01 |
| <b>SETBP1</b>          | -0.34 | 2.73E-01 | 1.00E+00 | 0.28  | 4.80E-01 | 9.02E-01 |
| <b>G28332</b>          | 0.42  | 5.86E-01 | 1.00E+00 | 0.55  | 4.80E-01 | 9.02E-01 |
| <b>MORC3</b>           | -0.13 | 5.88E-01 | 1.00E+00 | -0.13 | 4.80E-01 | 9.02E-01 |
| <b>TP53INP1</b>        | 0.32  | 9.66E-02 | 1.00E+00 | -0.21 | 4.80E-01 | 9.02E-01 |
| <b>MRVI1</b>           | -0.26 | 6.10E-01 | 1.00E+00 | 0.43  | 4.80E-01 | 9.02E-01 |
| <b>JMJD1C</b>          | -0.22 | 1.86E-01 | 1.00E+00 | 0.14  | 4.81E-01 | 9.02E-01 |
| <b>AL358933.1</b>      | -2.02 | 1.94E-01 | 1.00E+00 | -1.24 | 4.81E-01 | 9.02E-01 |
| <b>TMTC2</b>           | -0.23 | 4.93E-01 | 1.00E+00 | 0.38  | 4.81E-01 | 9.02E-01 |

|                   |       |          |          |       |          |          |
|-------------------|-------|----------|----------|-------|----------|----------|
| <b>PKD2</b>       | 0.35  | 1.83E-01 | 1.00E+00 | 0.36  | 4.81E-01 | 9.02E-01 |
| <b>TBX15</b>      | 0.66  | 1.95E-01 | 1.00E+00 | 0.37  | 4.81E-01 | 9.02E-01 |
| <b>TNKS1BP1</b>   | -0.05 | 8.48E-01 | 1.00E+00 | 0.41  | 4.81E-01 | 9.02E-01 |
| <b>LINC01315</b>  | 0.10  | 7.15E-01 | 1.00E+00 | -0.23 | 4.81E-01 | 9.02E-01 |
| <b>SAA2</b>       | -1.18 | 6.10E-01 | 1.00E+00 | -0.77 | 4.81E-01 | 9.02E-01 |
| <b>AGAP10P</b>    | -2.80 | 1.31E-01 | 1.00E+00 | 0.54  | 4.81E-01 | 9.02E-01 |
| <b>KAZN</b>       | 0.00  | 9.97E-01 | 1.00E+00 | -0.30 | 4.81E-01 | 9.02E-01 |
| <b>SLC2A4</b>     | 0.15  | 8.47E-01 | 1.00E+00 | -0.37 | 4.81E-01 | 9.02E-01 |
| <b>SLC1A5</b>     | -0.03 | 9.53E-01 | 1.00E+00 | -0.33 | 4.81E-01 | 9.02E-01 |
| <b>CARMIL3</b>    | -0.26 | 6.33E-01 | 1.00E+00 | 0.59  | 4.81E-01 | 9.02E-01 |
| <b>MPI</b>        | 0.05  | 8.43E-01 | 1.00E+00 | 0.14  | 4.81E-01 | 9.02E-01 |
| <b>AC092944.1</b> | -0.42 | 6.86E-01 | 1.00E+00 | -0.40 | 4.81E-01 | 9.02E-01 |
| <b>ZNF19</b>      | 0.73  | 2.55E-01 | 1.00E+00 | -0.44 | 4.81E-01 | 9.02E-01 |
| <b>AL049796.1</b> | -0.32 | 5.71E-01 | 1.00E+00 | -0.58 | 4.81E-01 | 9.02E-01 |
| <b>AC078899.1</b> | 0.60  | 5.40E-01 | 1.00E+00 | -0.56 | 4.81E-01 | 9.02E-01 |
| <b>FLJ22447</b>   | -0.51 | 4.35E-01 | 1.00E+00 | -0.56 | 4.81E-01 | 9.02E-01 |
| <b>CDH20</b>      | 0.45  | 4.96E-01 | 1.00E+00 | 0.65  | 4.81E-01 | 9.02E-01 |
| <b>HSD3B1</b>     | 0.99  | 7.52E-01 | 1.00E+00 | -2.21 | 4.81E-01 | 9.02E-01 |
| <b>ADGRF1</b>     | 2.12  | 4.21E-01 | 1.00E+00 | 1.17  | 4.81E-01 | 9.02E-01 |
| <b>CRAMP1</b>     | 0.09  | 7.71E-01 | 1.00E+00 | 0.41  | 4.81E-01 | 9.02E-01 |
| <b>TSHR</b>       | -0.07 | 9.59E-01 | 1.00E+00 | 0.60  | 4.81E-01 | 9.02E-01 |
| <b>MATN4</b>      | 0.72  | 2.67E-01 | 1.00E+00 | 0.49  | 4.82E-01 | 9.02E-01 |
| <b>AL358777.1</b> | 0.00  | 9.98E-01 | 1.00E+00 | 0.86  | 4.82E-01 | 9.02E-01 |
| <b>PLA2G2F</b>    | -0.22 | 7.75E-01 | 1.00E+00 | 0.49  | 4.82E-01 | 9.02E-01 |
| <b>MAGEF1</b>     | -0.01 | 9.70E-01 | 1.00E+00 | -0.31 | 4.82E-01 | 9.02E-01 |
| <b>HBS1L</b>      | 0.18  | 4.25E-01 | 1.00E+00 | -0.17 | 4.82E-01 | 9.02E-01 |
| <b>HAUS1</b>      | -0.15 | 5.70E-01 | 1.00E+00 | -0.18 | 4.82E-01 | 9.02E-01 |
| <b>POLM</b>       | -0.04 | 8.87E-01 | 1.00E+00 | 0.25  | 4.82E-01 | 9.02E-01 |
| <b>IKZF3</b>      | 0.03  | 9.72E-01 | 1.00E+00 | 1.95  | 4.82E-01 | 9.02E-01 |
| <b>PPP1CB</b>     | 0.17  | 4.86E-01 | 1.00E+00 | -0.27 | 4.82E-01 | 9.02E-01 |
| <b>ADNP-AS1</b>   | -0.12 | 8.53E-01 | 1.00E+00 | 0.49  | 4.82E-01 | 9.02E-01 |
| <b>G43233</b>     | 0.43  | 6.88E-01 | 1.00E+00 | 0.68  | 4.82E-01 | 9.02E-01 |

|                   |       |          |          |       |          |          |
|-------------------|-------|----------|----------|-------|----------|----------|
| <b>NUDT18</b>     | -0.21 | 4.99E-01 | 1.00E+00 | 0.41  | 4.82E-01 | 9.02E-01 |
| <b>TRAV8-4</b>    | -0.32 | 8.91E-01 | 1.00E+00 | 0.91  | 4.82E-01 | 9.03E-01 |
| <b>AC026877.1</b> | -0.41 | 9.05E-01 | 1.00E+00 | 0.50  | 4.82E-01 | 9.03E-01 |
| <b>IGHV3-7</b>    | 2.10  | 2.97E-01 | 1.00E+00 | 2.22  | 4.82E-01 | 9.03E-01 |
| <b>C1QTNF9</b>    | 0.54  | 8.06E-01 | 1.00E+00 | -1.60 | 4.82E-01 | 9.03E-01 |
| <b>MIA3</b>       | -0.16 | 4.93E-01 | 1.00E+00 | 0.11  | 4.82E-01 | 9.03E-01 |
| <b>NACAD</b>      | 0.15  | 7.43E-01 | 1.00E+00 | 0.41  | 4.83E-01 | 9.03E-01 |
| <b>AC008074.2</b> | 0.24  | 7.74E-01 | 1.00E+00 | 0.34  | 4.83E-01 | 9.03E-01 |
| <b>FERMT1</b>     | 0.13  | 7.07E-01 | 1.00E+00 | 0.41  | 4.83E-01 | 9.03E-01 |
| <b>AC126773.2</b> | 1.34  | 2.08E-01 | 1.00E+00 | -0.35 | 4.83E-01 | 9.03E-01 |
| <b>UBXN8</b>      | 0.18  | 6.00E-01 | 1.00E+00 | 0.19  | 4.83E-01 | 9.03E-01 |
| <b>ART3</b>       | -1.03 | 1.00E-01 | 1.00E+00 | -0.34 | 4.83E-01 | 9.03E-01 |
| <b>MT-TV</b>      | -0.56 | 8.73E-01 | 1.00E+00 | -0.70 | 4.83E-01 | 9.03E-01 |
| <b>AC022497.1</b> | 0.72  | 8.09E-02 | 1.00E+00 | 0.68  | 4.83E-01 | 9.03E-01 |
| <b>LINC00842</b>  | 0.04  | 9.21E-01 | 1.00E+00 | -0.39 | 4.83E-01 | 9.03E-01 |
| <b>HUWE1</b>      | -0.20 | 3.91E-01 | 1.00E+00 | 0.31  | 4.83E-01 | 9.03E-01 |
| <b>ABHD16A</b>    | 0.01  | 9.90E-01 | 1.00E+00 | 0.50  | 4.83E-01 | 9.03E-01 |
| <b>ZNF3</b>       | -0.01 | 9.75E-01 | 1.00E+00 | -0.14 | 4.83E-01 | 9.03E-01 |
| <b>NKG7</b>       | -0.20 | 7.73E-01 | 1.00E+00 | 1.91  | 4.83E-01 | 9.03E-01 |
| <b>FAM178B</b>    | -0.59 | 3.15E-01 | 1.00E+00 | -0.31 | 4.83E-01 | 9.03E-01 |
| <b>NR4A3</b>      | -1.85 | 1.80E-02 | 8.42E-01 | 2.19  | 4.83E-01 | 9.03E-01 |
| <b>TIPARP-AS1</b> | -0.17 | 8.21E-01 | 1.00E+00 | -0.36 | 4.83E-01 | 9.03E-01 |
| <b>PLET1</b>      | -2.06 | 5.41E-01 | 1.00E+00 | -1.41 | 4.83E-01 | 9.03E-01 |
| <b>PTCHD4</b>     | 2.17  | 8.83E-02 | 1.00E+00 | 0.88  | 4.83E-01 | 9.03E-01 |
| <b>DDX27</b>      | -0.21 | 3.06E-01 | 1.00E+00 | -0.12 | 4.83E-01 | 9.03E-01 |
| <b>AL445426.1</b> | 2.28  | 7.26E-02 | 1.00E+00 | 0.56  | 4.83E-01 | 9.03E-01 |
| <b>CLPP</b>       | -0.09 | 7.26E-01 | 1.00E+00 | 0.09  | 4.83E-01 | 9.03E-01 |
| <b>PHF6</b>       | 0.40  | 1.77E-01 | 1.00E+00 | -0.18 | 4.84E-01 | 9.03E-01 |
| <b>HNRNPA3P6</b>  | 0.06  | 9.09E-01 | 1.00E+00 | 0.20  | 4.84E-01 | 9.03E-01 |
| <b>TMEM9B</b>     | 0.21  | 3.51E-01 | 1.00E+00 | -0.26 | 4.84E-01 | 9.03E-01 |
| <b>XIAP</b>       | 0.15  | 4.72E-01 | 1.00E+00 | 0.21  | 4.84E-01 | 9.03E-01 |
| <b>PM20D1</b>     | -0.08 | 9.79E-01 | 1.00E+00 | -2.19 | 4.84E-01 | 9.03E-01 |

|             |       |          |          |       |          |          |
|-------------|-------|----------|----------|-------|----------|----------|
| MAS1L       | 1.32  | 1.70E-01 | 1.00E+00 | 0.57  | 4.84E-01 | 9.03E-01 |
| RPL11P3     | 0.37  | 7.70E-01 | 1.00E+00 | 0.37  | 4.84E-01 | 9.03E-01 |
| NEK4        | 0.23  | 3.01E-01 | 1.00E+00 | 0.22  | 4.84E-01 | 9.04E-01 |
| EIF1AY      | 0.33  | 5.78E-01 | 1.00E+00 | 1.66  | 4.84E-01 | 9.04E-01 |
| ETNK2       | -0.55 | 1.77E-01 | 1.00E+00 | -0.31 | 4.84E-01 | 9.04E-01 |
| ZBTB14      | 0.15  | 4.68E-01 | 1.00E+00 | -0.14 | 4.84E-01 | 9.04E-01 |
| CLEC4F      | -0.92 | 6.05E-01 | 1.00E+00 | 1.12  | 4.84E-01 | 9.04E-01 |
| PHEX        | 0.40  | 6.09E-01 | 1.00E+00 | 0.63  | 4.84E-01 | 9.04E-01 |
| IGKV2D-29   | 1.50  | 6.62E-01 | 1.00E+00 | 2.23  | 4.84E-01 | 9.04E-01 |
| APOBEC3H    | -1.90 | 3.57E-01 | 1.00E+00 | 0.79  | 4.84E-01 | 9.04E-01 |
| CEP83       | -0.32 | 4.37E-01 | 1.00E+00 | -0.19 | 4.84E-01 | 9.04E-01 |
| WDR89       | 0.09  | 8.28E-01 | 1.00E+00 | -0.23 | 4.84E-01 | 9.04E-01 |
| LCE1E       | -1.71 | 1.33E-01 | 1.00E+00 | 0.58  | 4.84E-01 | 9.04E-01 |
| QTRT2       | -0.16 | 5.22E-01 | 1.00E+00 | -0.15 | 4.84E-01 | 9.04E-01 |
| AC098829.1  | -1.30 | 1.94E-01 | 1.00E+00 | -0.44 | 4.84E-01 | 9.04E-01 |
| SESTD1      | 0.77  | 1.09E-01 | 1.00E+00 | -0.33 | 4.84E-01 | 9.04E-01 |
| C5orf58     | 1.77  | 2.33E-01 | 1.00E+00 | 0.77  | 4.85E-01 | 9.04E-01 |
| NOSTRIN     | 0.53  | 3.98E-01 | 1.00E+00 | -0.30 | 4.85E-01 | 9.04E-01 |
| ZNF75D      | 0.16  | 5.22E-01 | 1.00E+00 | 0.32  | 4.85E-01 | 9.04E-01 |
| SELENBP1    | 0.53  | 3.29E-01 | 1.00E+00 | -0.26 | 4.85E-01 | 9.04E-01 |
| LINC00896   | 2.01  | 5.54E-01 | 1.00E+00 | -0.95 | 4.85E-01 | 9.04E-01 |
| RTKN2       | -0.21 | 6.15E-01 | 1.00E+00 | 0.34  | 4.85E-01 | 9.04E-01 |
| TBC1D9B     | -0.14 | 5.27E-01 | 1.00E+00 | 0.31  | 4.85E-01 | 9.04E-01 |
| AC005702.1  | 0.39  | 5.79E-01 | 1.00E+00 | 0.51  | 4.85E-01 | 9.04E-01 |
| RNF187      | -0.03 | 9.04E-01 | 1.00E+00 | -0.39 | 4.85E-01 | 9.04E-01 |
| PRRX2       | -0.30 | 2.70E-01 | 1.00E+00 | 0.43  | 4.85E-01 | 9.04E-01 |
| DIXDC1      | 0.32  | 4.61E-01 | 1.00E+00 | -0.28 | 4.85E-01 | 9.04E-01 |
| XLOC_003854 | NA    | NA       | NA       | -1.14 | 4.85E-01 | 9.04E-01 |
| IL20RB-AS1  | -0.86 | 4.60E-01 | 1.00E+00 | 0.55  | 4.85E-01 | 9.04E-01 |
| TMEM170A    | 0.50  | 1.19E-01 | 1.00E+00 | -0.16 | 4.85E-01 | 9.04E-01 |
| AC109326.1  | 0.13  | 9.14E-01 | 1.00E+00 | -0.52 | 4.85E-01 | 9.04E-01 |
| SLC24A5     | 0.19  | 8.17E-01 | 1.00E+00 | 0.56  | 4.86E-01 | 9.04E-01 |



|                   |       |          |          |       |          |          |
|-------------------|-------|----------|----------|-------|----------|----------|
| <b>AL118506.1</b> | -0.10 | 7.40E-01 | 1.00E+00 | 0.44  | 4.86E-01 | 9.04E-01 |
| <b>BANF1P2</b>    | -1.38 | 1.56E-01 | 1.00E+00 | 0.48  | 4.86E-01 | 9.04E-01 |
| <b>NIPAL3</b>     | 0.17  | 5.87E-01 | 1.00E+00 | -0.17 | 4.86E-01 | 9.04E-01 |
| <b>LINC02453</b>  | -1.79 | 2.70E-01 | 1.00E+00 | -0.47 | 4.86E-01 | 9.04E-01 |
| <b>MFSD11</b>     | 0.21  | 3.34E-01 | 1.00E+00 | -0.17 | 4.86E-01 | 9.04E-01 |
| <b>G3616</b>      | 0.43  | 6.04E-01 | 1.00E+00 | 0.58  | 4.86E-01 | 9.04E-01 |
| <b>G32994</b>     | -1.94 | 2.72E-01 | 1.00E+00 | 0.69  | 4.86E-01 | 9.04E-01 |
| <b>AC137767.1</b> | -0.23 | 8.43E-01 | 1.00E+00 | 0.48  | 4.86E-01 | 9.04E-01 |
| <b>AL079303.1</b> | 3.63  | 2.27E-01 | 1.00E+00 | -0.98 | 4.86E-01 | 9.04E-01 |
| <b>GPR22</b>      | 2.41  | 4.65E-01 | 1.00E+00 | -0.70 | 4.86E-01 | 9.04E-01 |
| <b>LRCOL1</b>     | -1.28 | 2.94E-01 | 1.00E+00 | 0.73  | 4.86E-01 | 9.04E-01 |
| <b>AL353662.2</b> | 0.36  | 9.17E-01 | 1.00E+00 | 0.55  | 4.86E-01 | 9.04E-01 |
| <b>PTPN22</b>     | 0.38  | 5.09E-01 | 1.00E+00 | 0.50  | 4.86E-01 | 9.04E-01 |
| <b>BLOC1S1</b>    | 0.62  | 2.04E-01 | 1.00E+00 | -0.42 | 4.86E-01 | 9.04E-01 |
| <b>FAHD1</b>      | -0.11 | 7.22E-01 | 1.00E+00 | -0.20 | 4.86E-01 | 9.04E-01 |
| <b>WDR37</b>      | 0.55  | 8.35E-02 | 1.00E+00 | 0.16  | 4.86E-01 | 9.04E-01 |
| <b>FOXP1</b>      | 0.01  | 9.83E-01 | 1.00E+00 | 0.28  | 4.86E-01 | 9.04E-01 |
| <b>ZSWIM9</b>     | -0.25 | 4.00E-01 | 1.00E+00 | 0.49  | 4.86E-01 | 9.04E-01 |
| <b>AC103923.1</b> | -0.96 | 4.47E-01 | 1.00E+00 | -0.66 | 4.86E-01 | 9.04E-01 |
| <b>ZSWIM8</b>     | -0.20 | 4.24E-01 | 1.00E+00 | 0.39  | 4.86E-01 | 9.04E-01 |
| <b>AC005261.3</b> | 0.39  | 3.68E-01 | 1.00E+00 | 0.25  | 4.86E-01 | 9.04E-01 |
| <b>PRAF2</b>      | 0.23  | 7.11E-01 | 1.00E+00 | 0.34  | 4.86E-01 | 9.04E-01 |
| <b>S100A9</b>     | -1.29 | 4.31E-02 | 1.00E+00 | 2.18  | 4.86E-01 | 9.04E-01 |
| <b>BX276092.7</b> | -0.32 | 8.26E-01 | 1.00E+00 | 0.54  | 4.86E-01 | 9.04E-01 |
| <b>SLC41A2</b>    | 0.16  | 7.49E-01 | 1.00E+00 | 0.34  | 4.86E-01 | 9.04E-01 |
| <b>MRPL53P1</b>   | -1.33 | 6.81E-01 | 1.00E+00 | 0.68  | 4.86E-01 | 9.04E-01 |
| <b>HDGFL3</b>     | 0.05  | 8.53E-01 | 1.00E+00 | 0.29  | 4.87E-01 | 9.05E-01 |
| <b>LINC01136</b>  | -0.02 | 9.87E-01 | 1.00E+00 | -0.52 | 4.87E-01 | 9.05E-01 |
| <b>DSEL</b>       | 0.48  | 2.35E-01 | 1.00E+00 | 0.33  | 4.87E-01 | 9.05E-01 |
| <b>SCAMP2</b>     | 0.09  | 6.56E-01 | 1.00E+00 | 0.10  | 4.87E-01 | 9.05E-01 |
| <b>MCF2L2</b>     | -2.62 | 2.59E-05 | 7.38E-03 | 0.53  | 4.87E-01 | 9.05E-01 |
| <b>PTPRG-AS1</b>  | -0.87 | 4.63E-01 | 1.00E+00 | 0.49  | 4.87E-01 | 9.05E-01 |

|               |       |          |          |       |          |          |
|---------------|-------|----------|----------|-------|----------|----------|
| ITCH          | 0.07  | 7.62E-01 | 1.00E+00 | 0.19  | 4.87E-01 | 9.05E-01 |
| CCDC110       | -0.27 | 6.07E-01 | 1.00E+00 | -0.49 | 4.87E-01 | 9.05E-01 |
| CEACAM21      | 0.66  | 4.85E-01 | 1.00E+00 | 0.72  | 4.87E-01 | 9.05E-01 |
| MRPL11        | -0.08 | 6.52E-01 | 1.00E+00 | -0.12 | 4.87E-01 | 9.05E-01 |
| ITGA1         | 0.30  | 5.85E-01 | 1.00E+00 | 0.39  | 4.87E-01 | 9.05E-01 |
| AC022217.3    | -1.42 | 4.24E-01 | 1.00E+00 | 0.72  | 4.87E-01 | 9.05E-01 |
| AC087392.2    | -0.93 | 5.39E-02 | 1.00E+00 | -0.57 | 4.87E-01 | 9.05E-01 |
| FAM69A        | 0.45  | 2.12E-01 | 1.00E+00 | -0.27 | 4.87E-01 | 9.05E-01 |
| CNNM3         | 0.01  | 9.48E-01 | 1.00E+00 | -0.40 | 4.87E-01 | 9.05E-01 |
| AC084880.1    | -0.58 | 2.92E-01 | 1.00E+00 | 0.37  | 4.87E-01 | 9.05E-01 |
| MGAT3-AS1     | -1.84 | 2.84E-01 | 1.00E+00 | -0.81 | 4.87E-01 | 9.05E-01 |
| FAM69B        | -0.22 | 5.23E-01 | 1.00E+00 | -0.41 | 4.87E-01 | 9.05E-01 |
| NCEH1         | 0.05  | 9.06E-01 | 1.00E+00 | 0.28  | 4.87E-01 | 9.05E-01 |
| UBE2N         | -0.05 | 8.37E-01 | 1.00E+00 | -0.20 | 4.87E-01 | 9.05E-01 |
| MBP           | -0.19 | 6.43E-01 | 1.00E+00 | -0.17 | 4.87E-01 | 9.05E-01 |
| ULBP3         | -0.28 | 7.59E-01 | 1.00E+00 | 0.53  | 4.87E-01 | 9.05E-01 |
| RPL10P16      | -0.01 | 9.84E-01 | 1.00E+00 | -0.28 | 4.87E-01 | 9.05E-01 |
| RAB18         | 0.15  | 5.84E-01 | 1.00E+00 | -0.22 | 4.87E-01 | 9.05E-01 |
| CYP4F3        | -0.50 | 3.43E-01 | 1.00E+00 | -0.41 | 4.87E-01 | 9.05E-01 |
| ABHD13        | -0.01 | 9.58E-01 | 1.00E+00 | -0.15 | 4.88E-01 | 9.05E-01 |
| KIRREL2       | 0.25  | 9.29E-01 | 1.00E+00 | -1.17 | 4.88E-01 | 9.05E-01 |
| FTH1P22       | 2.17  | 4.06E-01 | 1.00E+00 | 1.34  | 4.88E-01 | 9.05E-01 |
| LRRC46        | -0.86 | 4.38E-01 | 1.00E+00 | -0.69 | 4.88E-01 | 9.05E-01 |
| XLOC_003782   | 1.92  | 2.57E-03 | 2.61E-01 | 0.44  | 4.88E-01 | 9.05E-01 |
| AC106872.2    | -1.71 | 5.35E-01 | 1.00E+00 | -0.42 | 4.88E-01 | 9.05E-01 |
| ADORA2A-AS1   | -2.86 | 4.41E-03 | 3.75E-01 | -0.82 | 4.88E-01 | 9.05E-01 |
| KCND3         | -0.24 | 3.71E-01 | 1.00E+00 | 0.28  | 4.88E-01 | 9.05E-01 |
| JMJD7-PLA2G4B | 0.39  | 7.57E-01 | 1.00E+00 | 0.66  | 4.88E-01 | 9.05E-01 |
| HOXC9         | -0.06 | 8.99E-01 | 1.00E+00 | -0.22 | 4.88E-01 | 9.05E-01 |
| PFKP          | -0.53 | 9.86E-03 | 6.15E-01 | 0.26  | 4.88E-01 | 9.05E-01 |
| SEMA3B        | 0.53  | 3.61E-01 | 1.00E+00 | 0.46  | 4.88E-01 | 9.05E-01 |
| PMEL          | 0.05  | 9.21E-01 | 1.00E+00 | 0.45  | 4.88E-01 | 9.05E-01 |

|                     |       |          |          |       |          |          |
|---------------------|-------|----------|----------|-------|----------|----------|
| <b>GRM7-AS1</b>     | 0.92  | 4.35E-01 | 1.00E+00 | -0.87 | 4.88E-01 | 9.05E-01 |
| <b>AC114810.1</b>   | -0.47 | 6.68E-01 | 1.00E+00 | -0.61 | 4.88E-01 | 9.05E-01 |
| <b>RABGAP1L-IT1</b> | 2.69  | 4.27E-01 | 1.00E+00 | 0.91  | 4.88E-01 | 9.05E-01 |
| <b>EIF4BP3</b>      | -0.07 | 9.20E-01 | 1.00E+00 | 0.27  | 4.88E-01 | 9.05E-01 |
| <b>AC093297.2</b>   | 0.55  | 1.53E-01 | 1.00E+00 | -0.28 | 4.88E-01 | 9.05E-01 |
| <b>ACAD8</b>        | 0.03  | 8.90E-01 | 1.00E+00 | -0.19 | 4.88E-01 | 9.05E-01 |
| <b>TUBBP1</b>       | 0.23  | 8.73E-01 | 1.00E+00 | -0.34 | 4.89E-01 | 9.05E-01 |
| <b>DHCR24-DT</b>    | 1.67  | 2.11E-01 | 1.00E+00 | 0.56  | 4.89E-01 | 9.05E-01 |
| <b>ASCC2</b>        | -0.20 | 3.64E-01 | 1.00E+00 | 0.12  | 4.89E-01 | 9.05E-01 |
| <b>C6orf120</b>     | 0.14  | 5.73E-01 | 1.00E+00 | 0.30  | 4.89E-01 | 9.05E-01 |
| <b>AL356275.1</b>   | 0.16  | 7.45E-01 | 1.00E+00 | -0.51 | 4.89E-01 | 9.05E-01 |
| <b>FKBP14</b>       | 0.18  | 5.02E-01 | 1.00E+00 | -0.20 | 4.89E-01 | 9.05E-01 |
| <b>NAPEPLD</b>      | 0.11  | 7.36E-01 | 1.00E+00 | -0.18 | 4.89E-01 | 9.05E-01 |
| <b>AL121757.1</b>   | 0.84  | 7.86E-01 | 1.00E+00 | 1.39  | 4.89E-01 | 9.05E-01 |
| <b>AC012313.3</b>   | 0.98  | 3.88E-01 | 1.00E+00 | 0.67  | 4.89E-01 | 9.05E-01 |
| <b>PLEKHA4</b>      | -0.16 | 7.05E-01 | 1.00E+00 | 0.42  | 4.89E-01 | 9.05E-01 |
| <b>XLOC_011822</b>  | -0.74 | 7.47E-01 | 1.00E+00 | -0.65 | 4.89E-01 | 9.05E-01 |
| <b>SNORA59A</b>     | -0.51 | 8.81E-01 | 1.00E+00 | 0.51  | 4.89E-01 | 9.05E-01 |
| <b>SYT15</b>        | 1.04  | 2.76E-01 | 1.00E+00 | 0.28  | 4.89E-01 | 9.05E-01 |
| <b>HAND2</b>        | 1.66  | 1.51E-02 | 7.65E-01 | 0.67  | 4.89E-01 | 9.05E-01 |
| <b>TMEM94</b>       | 0.05  | 8.55E-01 | 1.00E+00 | 0.33  | 4.89E-01 | 9.05E-01 |
| <b>INO80C</b>       | 0.31  | 3.24E-01 | 1.00E+00 | -0.24 | 4.89E-01 | 9.05E-01 |
| <b>FAM216A</b>      | 0.14  | 6.97E-01 | 1.00E+00 | -0.25 | 4.89E-01 | 9.05E-01 |
| <b>AC069200.1</b>   | -0.87 | 4.99E-01 | 1.00E+00 | -0.47 | 4.89E-01 | 9.05E-01 |
| <b>CDC42EP5</b>     | -0.19 | 5.64E-01 | 1.00E+00 | 0.71  | 4.89E-01 | 9.05E-01 |
| <b>XLOC_004881</b>  | -0.08 | 8.68E-01 | 1.00E+00 | -0.34 | 4.89E-01 | 9.05E-01 |
| <b>AC124944.2</b>   | -2.27 | 4.43E-01 | 1.00E+00 | 1.04  | 4.89E-01 | 9.05E-01 |
| <b>NEU1</b>         | 0.11  | 4.84E-01 | 1.00E+00 | 0.12  | 4.89E-01 | 9.05E-01 |
| <b>GCH1</b>         | -0.26 | 3.50E-01 | 1.00E+00 | 0.38  | 4.89E-01 | 9.05E-01 |
| <b>CYP4Z2P</b>      | 0.78  | 3.76E-01 | 1.00E+00 | 0.53  | 4.89E-01 | 9.05E-01 |
| <b>CLEC5A</b>       | -0.63 | 2.36E-01 | 1.00E+00 | 0.51  | 4.90E-01 | 9.05E-01 |
| <b>ZNF233</b>       | 0.51  | 5.49E-01 | 1.00E+00 | 0.58  | 4.90E-01 | 9.05E-01 |

|            |       |          |          |       |          |          |
|------------|-------|----------|----------|-------|----------|----------|
| SEMA3C     | 0.27  | 5.88E-01 | 1.00E+00 | -0.22 | 4.90E-01 | 9.05E-01 |
| LINC00174  | -0.47 | 3.94E-01 | 1.00E+00 | 0.38  | 4.90E-01 | 9.05E-01 |
| MEDAG      | 0.56  | 2.49E-01 | 1.00E+00 | 0.51  | 4.90E-01 | 9.05E-01 |
| ZNF613     | 0.09  | 7.02E-01 | 1.00E+00 | 0.19  | 4.90E-01 | 9.06E-01 |
| MRPL20     | 0.02  | 8.85E-01 | 1.00E+00 | -0.16 | 4.90E-01 | 9.06E-01 |
| GALT       | -0.08 | 8.24E-01 | 1.00E+00 | -0.23 | 4.90E-01 | 9.06E-01 |
| ERO1B      | 0.48  | 2.42E-01 | 1.00E+00 | 0.25  | 4.90E-01 | 9.06E-01 |
| AL604028.1 | 0.25  | 5.26E-01 | 1.00E+00 | 0.41  | 4.90E-01 | 9.06E-01 |
| MRPL58     | -0.18 | 5.11E-01 | 1.00E+00 | -0.17 | 4.90E-01 | 9.06E-01 |
| AP002840.2 | 0.35  | 5.63E-01 | 1.00E+00 | 0.47  | 4.90E-01 | 9.06E-01 |
| KIAA1324L  | 0.05  | 8.96E-01 | 1.00E+00 | -0.37 | 4.90E-01 | 9.06E-01 |
| HNRNPA1P33 | 0.08  | 8.96E-01 | 1.00E+00 | 0.43  | 4.90E-01 | 9.06E-01 |
| UPK1B      | -0.34 | 5.14E-01 | 1.00E+00 | -0.63 | 4.90E-01 | 9.06E-01 |
| AC046168.1 | 0.23  | 8.77E-01 | 1.00E+00 | -0.97 | 4.90E-01 | 9.06E-01 |
| TXNRD1     | 0.41  | 1.42E-01 | 1.00E+00 | 0.30  | 4.90E-01 | 9.06E-01 |
| BRD8       | 0.28  | 1.07E-01 | 1.00E+00 | 0.15  | 4.90E-01 | 9.06E-01 |
| AMBP       | -3.33 | 2.09E-02 | 8.94E-01 | -0.64 | 4.90E-01 | 9.06E-01 |
| CDC123     | -0.07 | 6.81E-01 | 1.00E+00 | -0.26 | 4.90E-01 | 9.06E-01 |
| AC016747.1 | 0.42  | 3.34E-01 | 1.00E+00 | 0.34  | 4.90E-01 | 9.06E-01 |
| UNC13C     | -0.16 | 8.64E-01 | 1.00E+00 | -0.59 | 4.90E-01 | 9.06E-01 |
| SGTA       | -0.12 | 5.75E-01 | 1.00E+00 | 0.16  | 4.91E-01 | 9.06E-01 |
| AL732292.2 | 0.63  | 7.30E-01 | 1.00E+00 | 0.61  | 4.91E-01 | 9.06E-01 |
| LRRC42     | -0.17 | 4.92E-01 | 1.00E+00 | -0.11 | 4.91E-01 | 9.06E-01 |
| PSMB6      | -0.04 | 8.40E-01 | 1.00E+00 | -0.23 | 4.91E-01 | 9.06E-01 |
| HERC2P8    | NA    | NA       | NA       | 0.82  | 4.91E-01 | 9.06E-01 |
| AC109462.1 | 1.14  | 6.37E-01 | 1.00E+00 | -0.80 | 4.91E-01 | 9.06E-01 |
| B4GALT3    | 0.10  | 7.06E-01 | 1.00E+00 | 0.12  | 4.91E-01 | 9.07E-01 |
| MYL3       | 0.15  | 7.48E-01 | 1.00E+00 | 0.48  | 4.91E-01 | 9.07E-01 |
| AL031985.2 | NA    | NA       | NA       | -0.45 | 4.91E-01 | 9.07E-01 |
| AC073316.1 | 0.10  | 9.43E-01 | 1.00E+00 | 0.88  | 4.91E-01 | 9.07E-01 |
| LINC02240  | 3.27  | 2.96E-02 | 9.96E-01 | -2.17 | 4.91E-01 | 9.07E-01 |
| DKKL1      | 1.52  | 1.43E-01 | 1.00E+00 | 0.68  | 4.91E-01 | 9.07E-01 |

|                    |       |          |          |       |          |          |
|--------------------|-------|----------|----------|-------|----------|----------|
| <b>PRRG3</b>       | 0.67  | 2.28E-01 | 1.00E+00 | 0.34  | 4.91E-01 | 9.07E-01 |
| <b>AC005062.1</b>  | -3.02 | 3.72E-01 | 1.00E+00 | 0.62  | 4.91E-01 | 9.07E-01 |
| <b>CD207</b>       | -0.88 | 1.39E-01 | 1.00E+00 | -0.51 | 4.92E-01 | 9.07E-01 |
| <b>ANG</b>         | 0.29  | 3.43E-01 | 1.00E+00 | -0.34 | 4.92E-01 | 9.07E-01 |
| <b>PDPK2P</b>      | -0.74 | 1.94E-01 | 1.00E+00 | 0.49  | 4.92E-01 | 9.07E-01 |
| <b>RPS14</b>       | -0.22 | 5.33E-01 | 1.00E+00 | 0.22  | 4.92E-01 | 9.07E-01 |
| <b>ZNF610</b>      | 0.33  | 6.21E-01 | 1.00E+00 | -0.55 | 4.92E-01 | 9.07E-01 |
| <b>SLC25A28</b>    | -0.27 | 3.73E-01 | 1.00E+00 | 0.41  | 4.92E-01 | 9.07E-01 |
| <b>ADAMTS13</b>    | 0.13  | 8.44E-01 | 1.00E+00 | 0.67  | 4.92E-01 | 9.07E-01 |
| <b>FAM229B</b>     | -0.31 | 4.63E-01 | 1.00E+00 | -0.21 | 4.92E-01 | 9.07E-01 |
| <b>MIF</b>         | -1.17 | 1.33E-01 | 1.00E+00 | 0.50  | 4.92E-01 | 9.07E-01 |
| <b>ALDH5A1</b>     | 0.06  | 7.31E-01 | 1.00E+00 | -0.26 | 4.92E-01 | 9.07E-01 |
| <b>RABEPK</b>      | -0.04 | 7.92E-01 | 1.00E+00 | -0.11 | 4.92E-01 | 9.07E-01 |
| <b>XLOC_013181</b> | -1.20 | 3.49E-01 | 1.00E+00 | -0.45 | 4.92E-01 | 9.07E-01 |
| <b>DNAH14</b>      | 0.11  | 8.84E-01 | 1.00E+00 | 0.59  | 4.92E-01 | 9.07E-01 |
| <b>AL603839.3</b>  | 1.97  | 3.44E-02 | 1.00E+00 | 0.36  | 4.92E-01 | 9.07E-01 |
| <b>SAV1</b>        | 0.04  | 8.75E-01 | 1.00E+00 | -0.29 | 4.92E-01 | 9.07E-01 |
| <b>AC091982.3</b>  | -0.07 | 8.18E-01 | 1.00E+00 | -0.24 | 4.92E-01 | 9.07E-01 |
| <b>AP001318.2</b>  | 0.97  | 1.12E-01 | 1.00E+00 | 0.30  | 4.92E-01 | 9.07E-01 |
| <b>CTSG</b>        | 0.80  | 1.98E-01 | 1.00E+00 | 0.42  | 4.92E-01 | 9.07E-01 |
| <b>SGTB</b>        | -0.01 | 9.72E-01 | 1.00E+00 | 0.22  | 4.92E-01 | 9.07E-01 |
| <b>G35570</b>      | -2.48 | 4.68E-01 | 1.00E+00 | -1.10 | 4.92E-01 | 9.07E-01 |
| <b>TCEAL5</b>      | 0.79  | 5.09E-01 | 1.00E+00 | -0.63 | 4.92E-01 | 9.07E-01 |
| <b>MAL2-AS1</b>    | -2.12 | 4.32E-01 | 1.00E+00 | -0.95 | 4.92E-01 | 9.07E-01 |
| <b>HS3ST5</b>      | 0.35  | 7.55E-01 | 1.00E+00 | -0.92 | 4.92E-01 | 9.07E-01 |
| <b>AP001351.1</b>  | -1.78 | 1.06E-01 | 1.00E+00 | 0.50  | 4.92E-01 | 9.07E-01 |
| <b>OSR1</b>        | 0.69  | 6.44E-02 | 1.00E+00 | 0.25  | 4.92E-01 | 9.07E-01 |
| <b>POLR2I</b>      | 0.47  | 4.04E-01 | 1.00E+00 | -0.44 | 4.92E-01 | 9.07E-01 |
| <b>TMEM98</b>      | 0.17  | 6.38E-01 | 1.00E+00 | 0.18  | 4.92E-01 | 9.07E-01 |
| <b>G15642</b>      | 0.73  | 1.32E-01 | 1.00E+00 | -0.43 | 4.93E-01 | 9.07E-01 |
| <b>LINC01122</b>   | -2.13 | 3.54E-01 | 1.00E+00 | -0.96 | 4.93E-01 | 9.07E-01 |
| <b>RPS6KC1</b>     | -0.14 | 5.52E-01 | 1.00E+00 | 0.15  | 4.93E-01 | 9.07E-01 |

|            |       |          |          |       |          |          |
|------------|-------|----------|----------|-------|----------|----------|
| CERK       | 0.36  | 3.51E-01 | 1.00E+00 | 0.27  | 4.93E-01 | 9.07E-01 |
| STAT2      | 0.06  | 9.01E-01 | 1.00E+00 | 0.30  | 4.93E-01 | 9.07E-01 |
| UFL1       | 0.04  | 8.77E-01 | 1.00E+00 | -0.15 | 4.93E-01 | 9.07E-01 |
| ANGPTL5    | 1.17  | 1.76E-02 | 8.33E-01 | 0.45  | 4.93E-01 | 9.07E-01 |
| PYGO2      | 0.00  | 9.83E-01 | 1.00E+00 | -0.30 | 4.93E-01 | 9.07E-01 |
| AC067852.2 | NA    | NA       | NA       | 0.58  | 4.93E-01 | 9.07E-01 |
| BRD9       | 0.15  | 3.79E-01 | 1.00E+00 | 0.26  | 4.93E-01 | 9.07E-01 |
| CELF2-AS2  | 1.96  | 5.66E-01 | 1.00E+00 | 0.81  | 4.93E-01 | 9.07E-01 |
| C2orf15    | 0.05  | 8.92E-01 | 1.00E+00 | -0.33 | 4.93E-01 | 9.07E-01 |
| TMEM121B   | -0.67 | 8.97E-02 | 1.00E+00 | 0.64  | 4.93E-01 | 9.07E-01 |
| ZNF581     | -0.04 | 8.56E-01 | 1.00E+00 | 0.18  | 4.93E-01 | 9.07E-01 |
| ACVR1C     | 3.55  | 1.71E-02 | 8.25E-01 | -0.62 | 4.93E-01 | 9.07E-01 |
| TRIM40     | -0.20 | 9.53E-01 | 1.00E+00 | -2.19 | 4.93E-01 | 9.07E-01 |
| HSP90AB3P  | -0.37 | 8.19E-01 | 1.00E+00 | -0.43 | 4.93E-01 | 9.07E-01 |
| ANGPTL1    | 0.82  | 8.44E-02 | 1.00E+00 | 0.32  | 4.93E-01 | 9.07E-01 |
| MAFG-DT    | -0.22 | 4.45E-01 | 1.00E+00 | -0.55 | 4.93E-01 | 9.07E-01 |
| C11orf96   | -1.76 | 2.82E-06 | 9.97E-04 | 0.56  | 4.93E-01 | 9.07E-01 |
| AC006001.3 | -0.11 | 6.30E-01 | 1.00E+00 | 0.15  | 4.93E-01 | 9.07E-01 |
| AC104046.1 | -2.44 | 1.72E-01 | 1.00E+00 | -0.60 | 4.93E-01 | 9.07E-01 |
| TOP3A      | 0.01  | 9.71E-01 | 1.00E+00 | 0.29  | 4.94E-01 | 9.07E-01 |
| CLK1       | -0.63 | 3.11E-01 | 1.00E+00 | -0.27 | 4.94E-01 | 9.07E-01 |
| FBXL16     | -0.43 | 3.04E-01 | 1.00E+00 | -0.45 | 4.94E-01 | 9.07E-01 |
| SPRYD7     | -0.07 | 7.80E-01 | 1.00E+00 | -0.19 | 4.94E-01 | 9.07E-01 |
| SGCZ       | 1.72  | 2.43E-01 | 1.00E+00 | 1.67  | 4.94E-01 | 9.07E-01 |
| FOXL1      | -0.74 | 3.50E-01 | 1.00E+00 | 0.85  | 4.94E-01 | 9.07E-01 |
| RPL9P8     | -1.09 | 6.07E-01 | 1.00E+00 | -0.47 | 4.94E-01 | 9.07E-01 |
| ME2        | -0.07 | 8.06E-01 | 1.00E+00 | -0.23 | 4.94E-01 | 9.07E-01 |
| IL20       | -2.56 | 2.34E-01 | 1.00E+00 | 2.15  | 4.94E-01 | 9.07E-01 |
| GFM2       | 0.07  | 7.96E-01 | 1.00E+00 | -0.14 | 4.94E-01 | 9.07E-01 |
| G30952     | -0.40 | 7.81E-01 | 1.00E+00 | 0.80  | 4.94E-01 | 9.07E-01 |
| METRNL     | -0.06 | 8.74E-01 | 1.00E+00 | 0.36  | 4.94E-01 | 9.07E-01 |
| TRMT10A    | 0.86  | 7.84E-02 | 1.00E+00 | -0.26 | 4.94E-01 | 9.07E-01 |

|                   |       |          |          |       |          |          |
|-------------------|-------|----------|----------|-------|----------|----------|
| <b>NTAN1P2</b>    | 1.38  | 3.76E-01 | 1.00E+00 | 0.51  | 4.94E-01 | 9.07E-01 |
| <b>AC018845.3</b> | -1.15 | 4.85E-01 | 1.00E+00 | 0.85  | 4.94E-01 | 9.07E-01 |
| <b>PACS1</b>      | -0.28 | 3.29E-01 | 1.00E+00 | 0.39  | 4.94E-01 | 9.07E-01 |
| <b>IGSF3</b>      | -0.53 | 5.06E-02 | 1.00E+00 | 0.35  | 4.94E-01 | 9.07E-01 |
| <b>TMEM126B</b>   | 0.21  | 3.65E-01 | 1.00E+00 | -0.19 | 4.94E-01 | 9.07E-01 |
| <b>ABHD12B</b>    | 0.20  | 7.22E-01 | 1.00E+00 | -0.40 | 4.94E-01 | 9.07E-01 |
| <b>PILRB</b>      | 1.65  | 1.71E-01 | 1.00E+00 | 0.75  | 4.94E-01 | 9.07E-01 |
| <b>NCR1</b>       | -2.69 | 3.05E-01 | 1.00E+00 | 1.06  | 4.94E-01 | 9.07E-01 |
| <b>ATF7IP2</b>    | 0.35  | 3.41E-01 | 1.00E+00 | 0.26  | 4.94E-01 | 9.07E-01 |
| <b>AC087620.1</b> | 1.90  | 2.50E-01 | 1.00E+00 | 0.63  | 4.94E-01 | 9.07E-01 |
| <b>COTL1</b>      | 0.09  | 8.32E-01 | 1.00E+00 | 0.45  | 4.94E-01 | 9.07E-01 |
| <b>DIP2B</b>      | 0.07  | 7.89E-01 | 1.00E+00 | 0.28  | 4.94E-01 | 9.07E-01 |
| <b>B3GAT2</b>     | 0.95  | 5.18E-01 | 1.00E+00 | 0.64  | 4.94E-01 | 9.07E-01 |
| <b>TADA1</b>      | 0.05  | 8.37E-01 | 1.00E+00 | -0.24 | 4.94E-01 | 9.07E-01 |
| <b>LINC01558</b>  | -0.66 | 5.00E-01 | 1.00E+00 | 0.58  | 4.94E-01 | 9.07E-01 |
| <b>LINC00113</b>  | 2.50  | 3.74E-01 | 1.00E+00 | -0.80 | 4.94E-01 | 9.07E-01 |
| <b>AP005329.2</b> | -0.98 | 4.12E-01 | 1.00E+00 | -0.45 | 4.94E-01 | 9.07E-01 |
| <b>AGBL2</b>      | -0.69 | 5.63E-01 | 1.00E+00 | -0.64 | 4.94E-01 | 9.07E-01 |
| <b>AC055720.2</b> | -0.14 | 8.27E-01 | 1.00E+00 | 0.51  | 4.95E-01 | 9.07E-01 |
| <b>GBP6</b>       | -1.81 | 1.16E-04 | 2.76E-02 | 0.59  | 4.95E-01 | 9.07E-01 |
| <b>GAPDHP1</b>    | -0.10 | 9.20E-01 | 1.00E+00 | -0.36 | 4.95E-01 | 9.07E-01 |
| <b>PRG4</b>       | -1.03 | 4.66E-01 | 1.00E+00 | 0.56  | 4.95E-01 | 9.07E-01 |
| <b>SNORD89</b>    | -2.65 | 3.40E-01 | 1.00E+00 | 0.48  | 4.95E-01 | 9.07E-01 |
| <b>XPNPEP3</b>    | 0.07  | 8.04E-01 | 1.00E+00 | -0.19 | 4.95E-01 | 9.07E-01 |
| <b>ZMAT1</b>      | 0.41  | 5.08E-01 | 1.00E+00 | -0.42 | 4.95E-01 | 9.07E-01 |
| <b>Z97200.1</b>   | 0.60  | 6.19E-01 | 1.00E+00 | 0.62  | 4.95E-01 | 9.07E-01 |
| <b>ST7</b>        | 0.03  | 8.88E-01 | 1.00E+00 | -0.22 | 4.95E-01 | 9.07E-01 |
| <b>C9orf3</b>     | -0.15 | 3.12E-01 | 1.00E+00 | -0.16 | 4.95E-01 | 9.07E-01 |
| <b>CCNA2</b>      | 0.14  | 7.29E-01 | 1.00E+00 | 0.34  | 4.95E-01 | 9.07E-01 |
| <b>NYAP1</b>      | -0.56 | 2.14E-01 | 1.00E+00 | 0.88  | 4.95E-01 | 9.07E-01 |
| <b>BRICD5</b>     | 0.11  | 9.38E-01 | 1.00E+00 | 0.80  | 4.95E-01 | 9.07E-01 |
| <b>SOWAHA</b>     | -0.24 | 7.87E-01 | 1.00E+00 | -0.60 | 4.95E-01 | 9.07E-01 |

|                   |       |          |          |       |          |          |
|-------------------|-------|----------|----------|-------|----------|----------|
| <b>NEMP1</b>      | 0.28  | 5.80E-01 | 1.00E+00 | -0.26 | 4.95E-01 | 9.07E-01 |
| <b>SCO1</b>       | -0.18 | 3.56E-01 | 1.00E+00 | 0.11  | 4.95E-01 | 9.07E-01 |
| <b>GEMIN4</b>     | -0.27 | 3.50E-01 | 1.00E+00 | -0.17 | 4.95E-01 | 9.07E-01 |
| <b>TMEM11</b>     | -0.09 | 7.11E-01 | 1.00E+00 | -0.19 | 4.95E-01 | 9.07E-01 |
| <b>AC008610.1</b> | 2.01  | 2.81E-01 | 1.00E+00 | -0.63 | 4.95E-01 | 9.07E-01 |
| <b>AP001783.1</b> | 0.37  | 8.64E-01 | 1.00E+00 | -0.79 | 4.95E-01 | 9.07E-01 |
| <b>DTHD1</b>      | -2.79 | 6.52E-02 | 1.00E+00 | 1.04  | 4.95E-01 | 9.07E-01 |
| <b>CLN3</b>       | 2.03  | 8.65E-02 | 1.00E+00 | 0.30  | 4.95E-01 | 9.07E-01 |
| <b>LINC01985</b>  | 1.32  | 2.10E-01 | 1.00E+00 | 0.69  | 4.95E-01 | 9.07E-01 |
| <b>LUC7L3</b>     | 0.35  | 3.09E-01 | 1.00E+00 | 0.21  | 4.96E-01 | 9.07E-01 |
| <b>GPBAR1</b>     | 0.78  | 3.57E-01 | 1.00E+00 | 0.49  | 4.96E-01 | 9.07E-01 |
| <b>KRT16P4</b>    | -1.16 | 2.68E-01 | 1.00E+00 | -0.50 | 4.96E-01 | 9.07E-01 |
| <b>ZNF35</b>      | 0.03  | 9.04E-01 | 1.00E+00 | -0.18 | 4.96E-01 | 9.07E-01 |
| <b>FSIP1</b>      | 0.18  | 8.88E-01 | 1.00E+00 | -0.51 | 4.96E-01 | 9.07E-01 |
| <b>LINC01929</b>  | 0.44  | 6.94E-01 | 1.00E+00 | -1.08 | 4.96E-01 | 9.07E-01 |
| <b>KIAA1522</b>   | -0.29 | 2.83E-01 | 1.00E+00 | 0.34  | 4.96E-01 | 9.07E-01 |
| <b>NLRP10</b>     | 0.16  | 8.49E-01 | 1.00E+00 | 0.52  | 4.96E-01 | 9.07E-01 |
| <b>LINC01918</b>  | -0.01 | 9.84E-01 | 1.00E+00 | -0.66 | 4.96E-01 | 9.07E-01 |
| <b>KIAA1217</b>   | -0.46 | 6.60E-02 | 1.00E+00 | 0.23  | 4.96E-01 | 9.07E-01 |
| <b>AC130324.1</b> | 0.68  | 7.52E-01 | 1.00E+00 | -0.56 | 4.96E-01 | 9.07E-01 |
| <b>AF129075.1</b> | -0.62 | 7.88E-01 | 1.00E+00 | 0.70  | 4.96E-01 | 9.07E-01 |
| <b>DNAJA4</b>     | 0.01  | 9.63E-01 | 1.00E+00 | -0.22 | 4.96E-01 | 9.07E-01 |
| <b>LINC00640</b>  | -0.52 | 1.45E-01 | 1.00E+00 | -0.47 | 4.96E-01 | 9.07E-01 |
| <b>SERTAD1</b>    | -0.75 | 1.06E-01 | 1.00E+00 | 0.23  | 4.96E-01 | 9.07E-01 |
| <b>IWS1</b>       | -0.04 | 8.03E-01 | 1.00E+00 | 0.16  | 4.96E-01 | 9.07E-01 |
| <b>UNC5CL</b>     | 0.63  | 4.78E-01 | 1.00E+00 | 0.77  | 4.96E-01 | 9.07E-01 |
| <b>C12orf73</b>   | 0.31  | 5.39E-01 | 1.00E+00 | 0.18  | 4.96E-01 | 9.07E-01 |
| <b>MT-ND4L</b>    | -0.16 | 7.29E-01 | 1.00E+00 | -0.46 | 4.96E-01 | 9.07E-01 |
| <b>ANAPC5</b>     | -0.12 | 5.94E-01 | 1.00E+00 | -0.14 | 4.96E-01 | 9.07E-01 |
| <b>AP005264.1</b> | -0.24 | 8.66E-01 | 1.00E+00 | -0.76 | 4.96E-01 | 9.07E-01 |
| <b>FLT4</b>       | 0.13  | 7.51E-01 | 1.00E+00 | 0.47  | 4.97E-01 | 9.07E-01 |
| <b>CDC5L</b>      | -0.07 | 7.27E-01 | 1.00E+00 | 0.08  | 4.97E-01 | 9.07E-01 |



|             |       |          |          |       |          |          |
|-------------|-------|----------|----------|-------|----------|----------|
| WWP1        | 0.26  | 2.14E-01 | 1.00E+00 | -0.13 | 4.97E-01 | 9.07E-01 |
| NR2C2AP     | 0.21  | 2.96E-01 | 1.00E+00 | -0.19 | 4.97E-01 | 9.07E-01 |
| IQCD        | 0.07  | 8.63E-01 | 1.00E+00 | 0.37  | 4.97E-01 | 9.07E-01 |
| AC007614.1  | 0.46  | 7.13E-01 | 1.00E+00 | 0.81  | 4.97E-01 | 9.07E-01 |
| B4GAT1      | 0.02  | 9.29E-01 | 1.00E+00 | -0.12 | 4.97E-01 | 9.07E-01 |
| AL035411.1  | 0.98  | 3.21E-01 | 1.00E+00 | -0.32 | 4.97E-01 | 9.07E-01 |
| AC093799.1  | 0.30  | 5.92E-01 | 1.00E+00 | -0.65 | 4.97E-01 | 9.07E-01 |
| ITPR2       | -0.02 | 9.40E-01 | 1.00E+00 | 0.23  | 4.97E-01 | 9.07E-01 |
| RN7SKP23    | 1.07  | 4.73E-01 | 1.00E+00 | 0.75  | 4.97E-01 | 9.07E-01 |
| XLOC_009294 | 1.20  | 4.16E-01 | 1.00E+00 | -1.05 | 4.97E-01 | 9.07E-01 |
| ETFBKMT     | 0.19  | 4.99E-01 | 1.00E+00 | -0.28 | 4.97E-01 | 9.07E-01 |
| PSMC3       | 0.02  | 9.26E-01 | 1.00E+00 | 0.12  | 4.97E-01 | 9.07E-01 |
| GTF3C6      | -0.01 | 9.60E-01 | 1.00E+00 | -0.21 | 4.97E-01 | 9.07E-01 |
| AC097375.1  | -0.02 | 9.77E-01 | 1.00E+00 | -0.65 | 4.97E-01 | 9.07E-01 |
| GPR137C     | -0.62 | 3.21E-01 | 1.00E+00 | 0.71  | 4.97E-01 | 9.07E-01 |
| AP5B1       | -0.51 | 1.26E-01 | 1.00E+00 | 0.40  | 4.97E-01 | 9.07E-01 |
| EPHB3       | -0.16 | 4.03E-01 | 1.00E+00 | -0.35 | 4.97E-01 | 9.07E-01 |
| SPSB4       | -0.36 | 7.10E-01 | 1.00E+00 | 0.65  | 4.97E-01 | 9.07E-01 |
| SLC44A3     | 0.18  | 6.16E-01 | 1.00E+00 | -0.24 | 4.97E-01 | 9.07E-01 |
| AC105450.1  | -1.14 | 6.66E-01 | 1.00E+00 | -0.87 | 4.97E-01 | 9.07E-01 |
| MFS14C      | -0.14 | 6.14E-01 | 1.00E+00 | -0.26 | 4.97E-01 | 9.07E-01 |
| AL132989.1  | 0.56  | 6.22E-01 | 1.00E+00 | 0.42  | 4.97E-01 | 9.07E-01 |
| MSLN        | 0.16  | 7.78E-01 | 1.00E+00 | -0.67 | 4.97E-01 | 9.07E-01 |
| CD2AP       | -0.06 | 8.25E-01 | 1.00E+00 | -0.12 | 4.97E-01 | 9.07E-01 |
| ZNHIT6      | 0.03  | 8.84E-01 | 1.00E+00 | -0.11 | 4.97E-01 | 9.07E-01 |
| TMEM216     | 0.01  | 9.84E-01 | 1.00E+00 | -0.20 | 4.97E-01 | 9.07E-01 |
| IGHV4-61    | -0.80 | 8.18E-01 | 1.00E+00 | 2.16  | 4.98E-01 | 9.07E-01 |
| PROK2       | -0.51 | 8.06E-01 | 1.00E+00 | 0.94  | 4.98E-01 | 9.07E-01 |
| XLOC_012574 | 0.03  | 9.93E-01 | 1.00E+00 | 0.47  | 4.98E-01 | 9.07E-01 |
| BTBD8       | -0.13 | 8.26E-01 | 1.00E+00 | 0.34  | 4.98E-01 | 9.07E-01 |
| LINC00926   | 0.59  | 5.11E-01 | 1.00E+00 | 0.52  | 4.98E-01 | 9.07E-01 |
| TTC29       | -1.84 | 5.15E-01 | 1.00E+00 | -1.09 | 4.98E-01 | 9.07E-01 |

|                   |       |          |          |       |          |          |
|-------------------|-------|----------|----------|-------|----------|----------|
| <b>ATP7A</b>      | 0.14  | 7.43E-01 | 1.00E+00 | -0.25 | 4.98E-01 | 9.07E-01 |
| <b>SLC8B1</b>     | 0.00  | 9.98E-01 | 1.00E+00 | 0.26  | 4.98E-01 | 9.07E-01 |
| <b>ZER1</b>       | -0.16 | 4.40E-01 | 1.00E+00 | -0.39 | 4.98E-01 | 9.07E-01 |
| <b>AC005899.5</b> | 1.82  | 3.04E-01 | 1.00E+00 | -0.88 | 4.98E-01 | 9.07E-01 |
| <b>AL512625.2</b> | 0.72  | 2.39E-01 | 1.00E+00 | 0.47  | 4.98E-01 | 9.07E-01 |
| <b>FANCL</b>      | -0.46 | 1.28E-01 | 1.00E+00 | -0.19 | 4.98E-01 | 9.07E-01 |
| <b>BHMT</b>       | -1.28 | 3.08E-01 | 1.00E+00 | -0.75 | 4.98E-01 | 9.07E-01 |
| <b>XXYLT1-AS2</b> | -2.06 | 5.14E-01 | 1.00E+00 | -0.83 | 4.98E-01 | 9.07E-01 |
| <b>KCNA3</b>      | 0.44  | 7.28E-01 | 1.00E+00 | 2.13  | 4.98E-01 | 9.07E-01 |
| <b>SLC25A48</b>   | 0.08  | 8.24E-01 | 1.00E+00 | 0.33  | 4.98E-01 | 9.07E-01 |
| <b>EFEMP1</b>     | 0.41  | 9.91E-02 | 1.00E+00 | 0.24  | 4.98E-01 | 9.07E-01 |
| <b>WDR11</b>      | 0.01  | 9.34E-01 | 1.00E+00 | 0.11  | 4.98E-01 | 9.07E-01 |
| <b>TRAJ39</b>     | NA    | NA       | NA       | -0.69 | 4.98E-01 | 9.07E-01 |
| <b>LINC00342</b>  | 0.27  | 7.81E-01 | 1.00E+00 | 0.68  | 4.98E-01 | 9.07E-01 |
| <b>CLIC1</b>      | -0.01 | 9.81E-01 | 1.00E+00 | 0.13  | 4.98E-01 | 9.07E-01 |
| <b>FZD7</b>       | -0.05 | 9.23E-01 | 1.00E+00 | 0.31  | 4.98E-01 | 9.07E-01 |
| <b>HRASLS5</b>    | 2.30  | 5.41E-02 | 1.00E+00 | -2.12 | 4.98E-01 | 9.07E-01 |
| <b>VNN1</b>       | 0.02  | 9.74E-01 | 1.00E+00 | 0.62  | 4.98E-01 | 9.07E-01 |
| <b>MIATNB</b>     | -0.16 | 7.36E-01 | 1.00E+00 | 0.18  | 4.98E-01 | 9.07E-01 |
| <b>LAMC3</b>      | 0.79  | 3.84E-02 | 1.00E+00 | 0.48  | 4.98E-01 | 9.07E-01 |
| <b>ANKRD9</b>     | -0.21 | 3.30E-01 | 1.00E+00 | 0.47  | 4.98E-01 | 9.07E-01 |
| <b>VDR</b>        | -0.20 | 5.81E-01 | 1.00E+00 | 0.32  | 4.98E-01 | 9.07E-01 |
| <b>NUDT4</b>      | 0.20  | 4.08E-01 | 1.00E+00 | -0.36 | 4.98E-01 | 9.07E-01 |
| <b>RPL21P32</b>   | NA    | NA       | NA       | 0.86  | 4.99E-01 | 9.07E-01 |
| <b>HDLBP</b>      | -0.07 | 7.43E-01 | 1.00E+00 | 0.23  | 4.99E-01 | 9.07E-01 |
| <b>AC008537.3</b> | -0.07 | 9.55E-01 | 1.00E+00 | -0.91 | 4.99E-01 | 9.07E-01 |
| <b>PDCL3</b>      | 0.03  | 9.09E-01 | 1.00E+00 | -0.23 | 4.99E-01 | 9.07E-01 |
| <b>AC091563.1</b> | 0.31  | 3.92E-01 | 1.00E+00 | -0.38 | 4.99E-01 | 9.07E-01 |
| <b>MOGAT1</b>     | 1.47  | 3.23E-01 | 1.00E+00 | -2.14 | 4.99E-01 | 9.07E-01 |
| <b>AC128709.1</b> | -0.73 | 5.52E-01 | 1.00E+00 | -0.83 | 4.99E-01 | 9.07E-01 |
| <b>G22923</b>     | -0.30 | 8.24E-01 | 1.00E+00 | -0.86 | 4.99E-01 | 9.07E-01 |
| <b>MTG1</b>       | -1.29 | 4.86E-01 | 1.00E+00 | 0.46  | 4.99E-01 | 9.07E-01 |

|             |       |          |          |       |          |          |
|-------------|-------|----------|----------|-------|----------|----------|
| PTK2B       | 0.26  | 3.69E-01 | 1.00E+00 | 0.28  | 4.99E-01 | 9.07E-01 |
| CPA5        | -2.70 | 2.89E-02 | 9.88E-01 | -0.57 | 4.99E-01 | 9.07E-01 |
| AC005183.1  | 3.28  | 3.32E-01 | 1.00E+00 | 1.09  | 4.99E-01 | 9.07E-01 |
| PRED62      | 0.54  | 8.35E-01 | 1.00E+00 | 1.53  | 4.99E-01 | 9.07E-01 |
| FABP5P1     | 0.38  | 9.13E-01 | 1.00E+00 | 0.37  | 4.99E-01 | 9.07E-01 |
| CHCHD10     | 0.02  | 9.75E-01 | 1.00E+00 | 0.45  | 4.99E-01 | 9.07E-01 |
| TJAP1       | 0.05  | 8.36E-01 | 1.00E+00 | 0.31  | 4.99E-01 | 9.07E-01 |
| RPL4P5      | -0.43 | 6.60E-01 | 1.00E+00 | -0.39 | 4.99E-01 | 9.07E-01 |
| KRBOX4      | 0.17  | 5.99E-01 | 1.00E+00 | -0.18 | 4.99E-01 | 9.07E-01 |
| TMEM81      | 0.43  | 4.35E-01 | 1.00E+00 | 0.42  | 4.99E-01 | 9.07E-01 |
| DLK2        | 0.30  | 4.34E-01 | 1.00E+00 | -0.40 | 4.99E-01 | 9.07E-01 |
| AC007906.2  | -4.19 | 8.46E-03 | 5.67E-01 | -0.42 | 4.99E-01 | 9.07E-01 |
| ARPC1B      | -0.95 | 2.09E-01 | 1.00E+00 | 0.33  | 4.99E-01 | 9.07E-01 |
| CCDC22      | 0.01  | 9.44E-01 | 1.00E+00 | 0.22  | 4.99E-01 | 9.07E-01 |
| CIRBP       | 0.23  | 3.68E-01 | 1.00E+00 | 0.17  | 4.99E-01 | 9.07E-01 |
| UQCRC1      | -0.25 | 1.60E-01 | 1.00E+00 | -0.14 | 4.99E-01 | 9.07E-01 |
| ITPRID2     | 0.11  | 7.61E-01 | 1.00E+00 | 0.18  | 4.99E-01 | 9.07E-01 |
| PSMB1       | 0.00  | 9.87E-01 | 1.00E+00 | -0.18 | 4.99E-01 | 9.07E-01 |
| XLOC_012382 | 0.83  | 4.07E-01 | 1.00E+00 | -0.65 | 5.00E-01 | 9.07E-01 |
| AC024896.1  | -0.20 | 6.18E-01 | 1.00E+00 | 0.22  | 5.00E-01 | 9.07E-01 |
| F8          | 0.41  | 4.51E-01 | 1.00E+00 | -0.35 | 5.00E-01 | 9.07E-01 |
| XKR6        | -0.27 | 4.95E-01 | 1.00E+00 | -0.31 | 5.00E-01 | 9.08E-01 |
| SPATA9      | -1.03 | 6.76E-01 | 1.00E+00 | -0.52 | 5.00E-01 | 9.08E-01 |
| TRIM11      | -0.21 | 3.72E-01 | 1.00E+00 | 0.35  | 5.00E-01 | 9.08E-01 |
| CCDC90B     | 0.16  | 4.86E-01 | 1.00E+00 | -0.20 | 5.00E-01 | 9.08E-01 |
| FARP2       | 0.09  | 7.02E-01 | 1.00E+00 | 0.12  | 5.00E-01 | 9.08E-01 |
| MEFV        | -0.75 | 4.29E-01 | 1.00E+00 | 2.12  | 5.00E-01 | 9.08E-01 |
| MICE        | 2.73  | 1.34E-01 | 1.00E+00 | 0.77  | 5.00E-01 | 9.08E-01 |
| ERICD       | 0.70  | 4.81E-01 | 1.00E+00 | 0.85  | 5.00E-01 | 9.08E-01 |
| TICAM1      | -0.43 | 2.31E-01 | 1.00E+00 | 0.34  | 5.00E-01 | 9.08E-01 |
| PSPN        | 0.17  | 6.51E-01 | 1.00E+00 | 0.28  | 5.00E-01 | 9.08E-01 |
| AL365273.1  | -0.02 | 9.68E-01 | 1.00E+00 | -0.25 | 5.00E-01 | 9.08E-01 |

|                     |       |          |          |       |          |          |
|---------------------|-------|----------|----------|-------|----------|----------|
| <b>AP001527.2</b>   | -0.47 | 5.26E-01 | 1.00E+00 | -0.44 | 5.00E-01 | 9.08E-01 |
| <b>RSPH4A</b>       | -0.36 | 6.96E-01 | 1.00E+00 | 0.64  | 5.00E-01 | 9.08E-01 |
| <b>RRAD</b>         | -0.24 | 6.17E-01 | 1.00E+00 | 0.60  | 5.00E-01 | 9.08E-01 |
| <b>BCL3</b>         | -0.65 | 2.67E-02 | 9.52E-01 | 0.42  | 5.01E-01 | 9.08E-01 |
| <b>KNOP1</b>        | -0.18 | 4.15E-01 | 1.00E+00 | 0.17  | 5.01E-01 | 9.08E-01 |
| <b>AC005229.1</b>   | -0.19 | 6.83E-01 | 1.00E+00 | 0.22  | 5.01E-01 | 9.08E-01 |
| <b>FLVCR1-DT</b>    | -0.30 | 6.92E-01 | 1.00E+00 | 0.43  | 5.01E-01 | 9.08E-01 |
| <b>IPO4</b>         | NA    | NA       | NA       | 0.41  | 5.01E-01 | 9.08E-01 |
| <b>LINC01132</b>    | -1.36 | 1.74E-01 | 1.00E+00 | 0.68  | 5.01E-01 | 9.08E-01 |
| <b>AC021028.1</b>   | -0.30 | 8.81E-01 | 1.00E+00 | -0.73 | 5.01E-01 | 9.08E-01 |
| <b>AC008429.1</b>   | -2.30 | 1.68E-01 | 1.00E+00 | -0.53 | 5.01E-01 | 9.08E-01 |
| <b>XLOC_008613</b>  | 2.09  | 3.70E-01 | 1.00E+00 | -0.68 | 5.01E-01 | 9.08E-01 |
| <b>SIRT4</b>        | -0.81 | 1.17E-01 | 1.00E+00 | -0.43 | 5.01E-01 | 9.09E-01 |
| <b>EGFLAM</b>       | 0.04  | 9.10E-01 | 1.00E+00 | 0.40  | 5.01E-01 | 9.09E-01 |
| <b>AL139005.1</b>   | -2.20 | 1.66E-01 | 1.00E+00 | -0.86 | 5.01E-01 | 9.09E-01 |
| <b>AC015818.3</b>   | -1.19 | 6.39E-01 | 1.00E+00 | -0.74 | 5.01E-01 | 9.09E-01 |
| <b>SLC11A2</b>      | 0.27  | 1.81E-01 | 1.00E+00 | 0.14  | 5.02E-01 | 9.09E-01 |
| <b>AC008079.1</b>   | 1.13  | 2.24E-01 | 1.00E+00 | -0.56 | 5.02E-01 | 9.09E-01 |
| <b>RP11-435B5.4</b> | 0.38  | 4.27E-01 | 1.00E+00 | -0.31 | 5.02E-01 | 9.09E-01 |
| <b>MYCBP2</b>       | -0.22 | 4.01E-01 | 1.00E+00 | 0.17  | 5.02E-01 | 9.09E-01 |
| <b>RPS27</b>        | -0.12 | 7.08E-01 | 1.00E+00 | 0.25  | 5.02E-01 | 9.09E-01 |
| <b>PBX1</b>         | 0.09  | 7.99E-01 | 1.00E+00 | 0.25  | 5.02E-01 | 9.09E-01 |
| <b>SUPT5H</b>       | -0.24 | 2.49E-01 | 1.00E+00 | 0.23  | 5.02E-01 | 9.09E-01 |
| <b>STN1</b>         | -0.06 | 7.50E-01 | 1.00E+00 | 0.15  | 5.02E-01 | 9.09E-01 |
| <b>SLC34A2</b>      | 0.88  | 4.40E-01 | 1.00E+00 | -2.10 | 5.02E-01 | 9.09E-01 |
| <b>MIR193BHG</b>    | -0.27 | 4.41E-01 | 1.00E+00 | -0.17 | 5.02E-01 | 9.09E-01 |
| <b>KIF5A</b>        | -0.24 | 9.39E-01 | 1.00E+00 | 0.91  | 5.02E-01 | 9.09E-01 |
| <b>BANCR</b>        | -0.87 | 8.00E-01 | 1.00E+00 | -1.09 | 5.02E-01 | 9.09E-01 |
| <b>BMPR1A</b>       | 0.16  | 4.25E-01 | 1.00E+00 | -0.16 | 5.02E-01 | 9.09E-01 |
| <b>IGKV1D-13</b>    | 2.23  | 3.38E-01 | 1.00E+00 | 2.13  | 5.02E-01 | 9.09E-01 |
| <b>SNURF</b>        | -0.81 | 8.14E-01 | 1.00E+00 | -0.63 | 5.02E-01 | 9.09E-01 |
| <b>ZEB2-AS1</b>     | -0.49 | 8.87E-01 | 1.00E+00 | 0.61  | 5.02E-01 | 9.09E-01 |

|                    |       |          |          |       |          |          |
|--------------------|-------|----------|----------|-------|----------|----------|
| <b>XLOC_004800</b> | 3.67  | 8.10E-02 | 1.00E+00 | -2.11 | 5.02E-01 | 9.09E-01 |
| <b>PICALM</b>      | 0.02  | 8.96E-01 | 1.00E+00 | 0.26  | 5.02E-01 | 9.09E-01 |
| <b>SEC1P</b>       | -1.74 | 7.48E-03 | 5.25E-01 | 0.59  | 5.02E-01 | 9.09E-01 |
| <b>COMMD2</b>      | 0.06  | 7.50E-01 | 1.00E+00 | -0.20 | 5.02E-01 | 9.09E-01 |
| <b>G32125</b>      | 0.41  | 6.50E-01 | 1.00E+00 | 0.66  | 5.02E-01 | 9.09E-01 |
| <b>LINC01772</b>   | -0.30 | 6.84E-01 | 1.00E+00 | 0.47  | 5.02E-01 | 9.09E-01 |
| <b>DNAJC11</b>     | -0.26 | 2.40E-01 | 1.00E+00 | 0.18  | 5.02E-01 | 9.09E-01 |
| <b>FZD2</b>        | -0.05 | 9.10E-01 | 1.00E+00 | 1.92  | 5.03E-01 | 9.09E-01 |
| <b>IGSF1</b>       | 1.22  | 2.32E-02 | 9.14E-01 | 0.63  | 5.03E-01 | 9.09E-01 |
| <b>LILRA5</b>      | 0.51  | 7.13E-01 | 1.00E+00 | 2.10  | 5.03E-01 | 9.10E-01 |
| <b>AC132942.1</b>  | -2.64 | 3.29E-01 | 1.00E+00 | 0.55  | 5.03E-01 | 9.10E-01 |
| <b>RPSAP36</b>     | 1.48  | 3.96E-01 | 1.00E+00 | 0.67  | 5.03E-01 | 9.10E-01 |
| <b>LCP1</b>        | -0.46 | 2.05E-01 | 1.00E+00 | 0.34  | 5.03E-01 | 9.10E-01 |
| <b>TMEM147</b>     | 0.00  | 9.93E-01 | 1.00E+00 | -0.23 | 5.03E-01 | 9.10E-01 |
| <b>RBM44</b>       | -0.38 | 8.62E-01 | 1.00E+00 | 0.83  | 5.03E-01 | 9.10E-01 |
| <b>RAD51B</b>      | -0.10 | 6.36E-01 | 1.00E+00 | -0.23 | 5.03E-01 | 9.10E-01 |
| <b>SNORA2</b>      | -0.57 | 8.15E-01 | 1.00E+00 | 0.46  | 5.03E-01 | 9.10E-01 |
| <b>AC020907.1</b>  | -0.72 | 3.68E-01 | 1.00E+00 | -0.57 | 5.03E-01 | 9.10E-01 |
| <b>RECQL5</b>      | 0.05  | 8.46E-01 | 1.00E+00 | 0.27  | 5.03E-01 | 9.10E-01 |
| <b>KIAA1210</b>    | 1.00  | 6.64E-01 | 1.00E+00 | -1.09 | 5.03E-01 | 9.10E-01 |
| <b>DMBX1</b>       | 0.57  | 7.19E-01 | 1.00E+00 | -1.22 | 5.03E-01 | 9.10E-01 |
| <b>CTSW</b>        | -0.81 | 1.69E-01 | 1.00E+00 | 1.78  | 5.03E-01 | 9.10E-01 |
| <b>MB21D2</b>      | -0.05 | 8.37E-01 | 1.00E+00 | 0.15  | 5.04E-01 | 9.10E-01 |
| <b>AC096586.2</b>  | -0.45 | 8.72E-01 | 1.00E+00 | 0.75  | 5.04E-01 | 9.10E-01 |
| <b>TM4SF1-AS1</b>  | 0.52  | 7.41E-01 | 1.00E+00 | -0.52 | 5.04E-01 | 9.10E-01 |
| <b>ZNF267</b>      | -0.41 | 2.43E-01 | 1.00E+00 | 0.13  | 5.04E-01 | 9.10E-01 |
| <b>PARP6</b>       | -0.07 | 7.99E-01 | 1.00E+00 | 0.25  | 5.04E-01 | 9.10E-01 |
| <b>PELI2</b>       | 0.09  | 7.86E-01 | 1.00E+00 | -0.24 | 5.04E-01 | 9.10E-01 |
| <b>C10orf71</b>    | -2.80 | 7.69E-02 | 1.00E+00 | -0.80 | 5.04E-01 | 9.10E-01 |
| <b>ERCC5</b>       | -0.47 | 2.66E-01 | 1.00E+00 | 0.21  | 5.04E-01 | 9.10E-01 |
| <b>SNRPCP2</b>     | 0.56  | 8.71E-01 | 1.00E+00 | 0.75  | 5.04E-01 | 9.10E-01 |
| <b>G39663</b>      | 0.87  | 3.55E-01 | 1.00E+00 | -0.48 | 5.04E-01 | 9.10E-01 |

|                    |       |          |          |       |          |          |
|--------------------|-------|----------|----------|-------|----------|----------|
| <b>XLOC_009475</b> | 0.62  | 7.04E-01 | 1.00E+00 | -0.70 | 5.04E-01 | 9.10E-01 |
| <b>VGLL2</b>       | 1.16  | 3.74E-01 | 1.00E+00 | -1.71 | 5.04E-01 | 9.10E-01 |
| <b>MAMDC2</b>      | 0.78  | 4.06E-02 | 1.00E+00 | -0.33 | 5.04E-01 | 9.10E-01 |
| <b>AC022007.1</b>  | 0.65  | 4.06E-01 | 1.00E+00 | -0.47 | 5.04E-01 | 9.10E-01 |
| <b>FTH1P16</b>     | 0.61  | 7.16E-01 | 1.00E+00 | -0.39 | 5.04E-01 | 9.10E-01 |
| <b>HRC</b>         | 0.23  | 6.65E-01 | 1.00E+00 | 1.37  | 5.04E-01 | 9.10E-01 |
| <b>LINC02302</b>   | -0.46 | 8.05E-01 | 1.00E+00 | 0.93  | 5.04E-01 | 9.10E-01 |
| <b>ZNF844</b>      | 0.06  | 8.09E-01 | 1.00E+00 | 0.23  | 5.04E-01 | 9.10E-01 |
| <b>INKA2</b>       | 0.97  | 4.20E-01 | 1.00E+00 | 0.36  | 5.04E-01 | 9.10E-01 |
| <b>AL049873.1</b>  | -1.54 | 2.91E-01 | 1.00E+00 | -0.44 | 5.04E-01 | 9.10E-01 |
| <b>FRMD1</b>       | 0.67  | 4.71E-01 | 1.00E+00 | 0.63  | 5.04E-01 | 9.10E-01 |
| <b>LRRC14</b>      | -0.22 | 3.15E-01 | 1.00E+00 | 0.17  | 5.04E-01 | 9.10E-01 |
| <b>MAPK1IP1L</b>   | -0.17 | 2.57E-01 | 1.00E+00 | -0.17 | 5.04E-01 | 9.10E-01 |
| <b>AC073957.3</b>  | 1.54  | 1.03E-01 | 1.00E+00 | -0.75 | 5.04E-01 | 9.10E-01 |
| <b>PPM1J</b>       | -0.17 | 6.64E-01 | 1.00E+00 | -0.26 | 5.05E-01 | 9.10E-01 |
| <b>XLOC_000133</b> | -0.38 | 3.99E-01 | 1.00E+00 | 0.46  | 5.05E-01 | 9.10E-01 |
| <b>ANKRD20A11P</b> | 0.42  | 6.07E-01 | 1.00E+00 | -0.59 | 5.05E-01 | 9.11E-01 |
| <b>HEYL</b>        | -0.48 | 1.30E-01 | 1.00E+00 | 0.41  | 5.05E-01 | 9.11E-01 |
| <b>AC006014.1</b>  | 0.13  | 8.89E-01 | 1.00E+00 | 0.43  | 5.05E-01 | 9.11E-01 |
| <b>KLRA1P</b>      | -0.48 | 7.11E-01 | 1.00E+00 | 0.48  | 5.05E-01 | 9.11E-01 |
| <b>ZBTB49</b>      | -0.43 | 1.87E-01 | 1.00E+00 | 0.25  | 5.05E-01 | 9.11E-01 |
| <b>SFPQ</b>        | -0.20 | 3.84E-01 | 1.00E+00 | -0.33 | 5.05E-01 | 9.11E-01 |
| <b>SEMA6A</b>      | 0.16  | 7.36E-01 | 1.00E+00 | 0.20  | 5.05E-01 | 9.11E-01 |
| <b>TDRD1</b>       | 1.73  | 1.39E-01 | 1.00E+00 | -0.63 | 5.05E-01 | 9.11E-01 |
| <b>HAS1</b>        | -0.59 | 4.42E-01 | 1.00E+00 | 0.42  | 5.05E-01 | 9.11E-01 |
| <b>AL357093.2</b>  | -2.03 | 2.93E-01 | 1.00E+00 | 0.56  | 5.05E-01 | 9.11E-01 |
| <b>G33807</b>      | -1.68 | 3.34E-01 | 1.00E+00 | 0.82  | 5.05E-01 | 9.11E-01 |
| <b>MALT1</b>       | -0.17 | 5.93E-01 | 1.00E+00 | -0.28 | 5.05E-01 | 9.11E-01 |
| <b>CFL1P1</b>      | 0.38  | 4.16E-01 | 1.00E+00 | -0.37 | 5.05E-01 | 9.11E-01 |
| <b>ZNF566</b>      | 0.21  | 4.45E-01 | 1.00E+00 | -0.19 | 5.06E-01 | 9.11E-01 |
| <b>CAPN8</b>       | -1.74 | 8.42E-02 | 1.00E+00 | 0.80  | 5.06E-01 | 9.11E-01 |
| <b>MMP17</b>       | 0.20  | 6.61E-01 | 1.00E+00 | 0.57  | 5.06E-01 | 9.11E-01 |

|              |       |          |          |       |          |          |
|--------------|-------|----------|----------|-------|----------|----------|
| KIAA1147     | 0.30  | 4.48E-01 | 1.00E+00 | 0.32  | 5.06E-01 | 9.11E-01 |
| CNOT4        | 0.02  | 9.28E-01 | 1.00E+00 | -0.17 | 5.06E-01 | 9.11E-01 |
| AC114296.1   | -0.38 | 2.76E-01 | 1.00E+00 | 0.57  | 5.06E-01 | 9.11E-01 |
| ARID4A       | 0.09  | 6.37E-01 | 1.00E+00 | -0.12 | 5.06E-01 | 9.11E-01 |
| AL122020.1   | -0.59 | 8.47E-01 | 1.00E+00 | -2.09 | 5.06E-01 | 9.11E-01 |
| CTB-178M22.2 | -0.37 | 7.12E-01 | 1.00E+00 | -0.54 | 5.06E-01 | 9.11E-01 |
| UBL3         | 0.42  | 1.13E-01 | 1.00E+00 | -0.15 | 5.06E-01 | 9.11E-01 |
| PCDHB8       | -1.95 | 7.85E-03 | 5.45E-01 | -1.40 | 5.06E-01 | 9.11E-01 |
| GOSR2        | 0.25  | 3.76E-01 | 1.00E+00 | -0.14 | 5.06E-01 | 9.11E-01 |
| AP005435.1   | -1.28 | 7.75E-02 | 1.00E+00 | -0.62 | 5.06E-01 | 9.11E-01 |
| HMGNS        | -0.09 | 8.00E-01 | 1.00E+00 | -0.23 | 5.06E-01 | 9.11E-01 |
| ALPK1        | -0.14 | 4.44E-01 | 1.00E+00 | 0.14  | 5.06E-01 | 9.11E-01 |
| HTR4         | 1.57  | 1.30E-01 | 1.00E+00 | -0.94 | 5.06E-01 | 9.11E-01 |
| C3orf14      | -0.55 | 2.19E-02 | 8.96E-01 | -0.28 | 5.06E-01 | 9.11E-01 |
| STAP2        | -0.31 | 4.49E-01 | 1.00E+00 | 0.28  | 5.06E-01 | 9.11E-01 |
| SF3B5        | -0.17 | 3.89E-01 | 1.00E+00 | -0.11 | 5.06E-01 | 9.11E-01 |
| TRA2A        | 0.03  | 8.97E-01 | 1.00E+00 | -0.12 | 5.06E-01 | 9.11E-01 |
| TRMT61A      | -0.23 | 3.47E-01 | 1.00E+00 | 0.31  | 5.06E-01 | 9.11E-01 |
| C1DP5        | -2.07 | 4.80E-01 | 1.00E+00 | 1.11  | 5.06E-01 | 9.11E-01 |
| DNAAF3       | -3.69 | 6.03E-05 | 1.57E-02 | 0.34  | 5.06E-01 | 9.11E-01 |
| JPH2         | -0.30 | 6.64E-01 | 1.00E+00 | -0.52 | 5.06E-01 | 9.11E-01 |
| PIAS1        | -0.05 | 8.08E-01 | 1.00E+00 | -0.22 | 5.07E-01 | 9.11E-01 |
| PSAT1        | -0.07 | 8.60E-01 | 1.00E+00 | -0.30 | 5.07E-01 | 9.11E-01 |
| AL118516.1   | -0.48 | 3.40E-01 | 1.00E+00 | -0.30 | 5.07E-01 | 9.11E-01 |
| ROBO1        | -0.23 | 4.58E-01 | 1.00E+00 | 0.28  | 5.07E-01 | 9.11E-01 |
| RIPK1        | -0.07 | 7.50E-01 | 1.00E+00 | 0.26  | 5.07E-01 | 9.11E-01 |
| NPM2         | -0.50 | 3.68E-01 | 1.00E+00 | -0.39 | 5.07E-01 | 9.11E-01 |
| G32314       | -1.32 | 3.45E-03 | 3.14E-01 | 0.48  | 5.07E-01 | 9.11E-01 |
| CLU1         | -0.70 | 8.41E-01 | 1.00E+00 | 1.11  | 5.07E-01 | 9.11E-01 |
| TAOK2        | -0.18 | 3.59E-01 | 1.00E+00 | 0.40  | 5.07E-01 | 9.11E-01 |
| AL359955.1   | 2.90  | 1.67E-01 | 1.00E+00 | -1.01 | 5.07E-01 | 9.11E-01 |
| ELAC1        | -0.05 | 8.28E-01 | 1.00E+00 | -0.22 | 5.07E-01 | 9.11E-01 |

|                    |       |          |          |       |          |          |
|--------------------|-------|----------|----------|-------|----------|----------|
| <b>DNAJB12</b>     | -0.17 | 3.43E-01 | 1.00E+00 | 0.10  | 5.07E-01 | 9.11E-01 |
| <b>YJEFN3</b>      | -2.25 | 1.13E-01 | 1.00E+00 | -0.64 | 5.07E-01 | 9.11E-01 |
| <b>NCK1</b>        | 0.12  | 5.47E-01 | 1.00E+00 | -0.18 | 5.07E-01 | 9.11E-01 |
| <b>CORO6</b>       | -0.80 | 6.65E-02 | 1.00E+00 | 0.50  | 5.07E-01 | 9.11E-01 |
| <b>KAT5</b>        | -0.28 | 1.67E-01 | 1.00E+00 | 0.13  | 5.07E-01 | 9.11E-01 |
| <b>TEAD1</b>       | 0.12  | 5.93E-01 | 1.00E+00 | 0.22  | 5.07E-01 | 9.11E-01 |
| <b>GSTO2</b>       | -0.09 | 7.20E-01 | 1.00E+00 | -0.34 | 5.07E-01 | 9.11E-01 |
| <b>RBM10</b>       | -0.06 | 7.89E-01 | 1.00E+00 | 0.21  | 5.07E-01 | 9.11E-01 |
| <b>UBXN2A</b>      | 0.02  | 9.27E-01 | 1.00E+00 | -0.13 | 5.07E-01 | 9.11E-01 |
| <b>INAFM2</b>      | 0.06  | 8.22E-01 | 1.00E+00 | 0.42  | 5.07E-01 | 9.11E-01 |
| <b>HSP90B2P</b>    | -2.73 | 7.46E-02 | 1.00E+00 | 0.28  | 5.07E-01 | 9.11E-01 |
| <b>PSKH1</b>       | -0.05 | 8.16E-01 | 1.00E+00 | 0.36  | 5.07E-01 | 9.11E-01 |
| <b>C6</b>          | 1.73  | 1.01E-01 | 1.00E+00 | 0.72  | 5.07E-01 | 9.11E-01 |
| <b>DIABLO</b>      | -0.81 | 3.33E-01 | 1.00E+00 | 0.36  | 5.07E-01 | 9.11E-01 |
| <b>IGSF11</b>      | 0.12  | 8.16E-01 | 1.00E+00 | 0.50  | 5.07E-01 | 9.11E-01 |
| <b>CLEC10A</b>     | -0.52 | 3.32E-01 | 1.00E+00 | 0.43  | 5.07E-01 | 9.11E-01 |
| <b>SNHG1</b>       | 0.28  | 4.13E-01 | 1.00E+00 | 0.31  | 5.07E-01 | 9.11E-01 |
| <b>TBC1D7</b>      | -0.16 | 4.82E-01 | 1.00E+00 | -0.25 | 5.07E-01 | 9.11E-01 |
| <b>XLOC_011308</b> | -0.41 | 7.68E-01 | 1.00E+00 | 1.11  | 5.08E-01 | 9.11E-01 |
| <b>RPS7</b>        | -0.16 | 6.27E-01 | 1.00E+00 | 0.15  | 5.08E-01 | 9.11E-01 |
| <b>ITFG1</b>       | 0.00  | 9.79E-01 | 1.00E+00 | -0.18 | 5.08E-01 | 9.11E-01 |
| <b>MSH5</b>        | 2.79  | 2.85E-01 | 1.00E+00 | 0.58  | 5.08E-01 | 9.11E-01 |
| <b>RHOBTB1</b>     | 0.42  | 2.02E-01 | 1.00E+00 | 0.41  | 5.08E-01 | 9.11E-01 |
| <b>GPX2</b>        | -0.40 | 1.14E-01 | 1.00E+00 | 0.30  | 5.08E-01 | 9.11E-01 |
| <b>MIR646HG</b>    | -0.35 | 7.25E-01 | 1.00E+00 | -0.49 | 5.08E-01 | 9.11E-01 |
| <b>CASKIN2</b>     | -0.46 | 2.61E-02 | 9.44E-01 | 0.39  | 5.08E-01 | 9.11E-01 |
| <b>GTF2B</b>       | 0.07  | 7.07E-01 | 1.00E+00 | -0.14 | 5.08E-01 | 9.11E-01 |
| <b>YME1L1</b>      | 0.01  | 9.75E-01 | 1.00E+00 | -0.12 | 5.08E-01 | 9.11E-01 |
| <b>UBAP2L</b>      | -0.18 | 3.10E-01 | 1.00E+00 | 0.15  | 5.08E-01 | 9.11E-01 |
| <b>AC099850.1</b>  | 0.10  | 8.47E-01 | 1.00E+00 | -0.31 | 5.08E-01 | 9.11E-01 |
| <b>RPS26P3</b>     | 2.09  | 1.15E-01 | 1.00E+00 | 0.49  | 5.08E-01 | 9.11E-01 |
| <b>BIRC6-AS2</b>   | -0.18 | 9.59E-01 | 1.00E+00 | -0.89 | 5.08E-01 | 9.11E-01 |



|                    |       |          |          |       |          |          |
|--------------------|-------|----------|----------|-------|----------|----------|
| <b>AC023090.2</b>  | -1.73 | 5.28E-01 | 1.00E+00 | 0.81  | 5.08E-01 | 9.11E-01 |
| <b>PITPNC1</b>     | 0.15  | 7.77E-01 | 1.00E+00 | 0.54  | 5.08E-01 | 9.11E-01 |
| <b>MOSPD1</b>      | 0.16  | 6.42E-01 | 1.00E+00 | -0.27 | 5.08E-01 | 9.11E-01 |
| <b>LEPROTL1</b>    | 0.19  | 4.31E-01 | 1.00E+00 | -0.16 | 5.08E-01 | 9.11E-01 |
| <b>VASN</b>        | 0.00  | 9.90E-01 | 1.00E+00 | 0.45  | 5.08E-01 | 9.11E-01 |
| <b>FAM133DP</b>    | -0.79 | 1.61E-01 | 1.00E+00 | -0.24 | 5.08E-01 | 9.11E-01 |
| <b>ITGAL</b>       | -0.66 | 3.08E-01 | 1.00E+00 | 2.07  | 5.08E-01 | 9.11E-01 |
| <b>LINC01894</b>   | 0.76  | 7.69E-01 | 1.00E+00 | -1.14 | 5.09E-01 | 9.11E-01 |
| <b>SLCO1C1</b>     | 0.34  | 6.15E-01 | 1.00E+00 | -0.53 | 5.09E-01 | 9.11E-01 |
| <b>LBX2-AS1</b>    | 0.61  | 2.17E-01 | 1.00E+00 | 0.35  | 5.09E-01 | 9.11E-01 |
| <b>MAG</b>         | -3.81 | 1.25E-03 | 1.89E-01 | -0.88 | 5.09E-01 | 9.11E-01 |
| <b>CNPY2</b>       | -1.01 | 1.29E-01 | 1.00E+00 | -0.30 | 5.09E-01 | 9.11E-01 |
| <b>AC002454.1</b>  | 2.65  | 7.27E-02 | 1.00E+00 | -0.62 | 5.09E-01 | 9.11E-01 |
| <b>AC092070.2</b>  | -0.75 | 5.59E-02 | 1.00E+00 | 0.27  | 5.09E-01 | 9.11E-01 |
| <b>ZNF778</b>      | 0.08  | 7.65E-01 | 1.00E+00 | 0.17  | 5.09E-01 | 9.11E-01 |
| <b>KCNRG</b>       | -2.36 | 1.64E-01 | 1.00E+00 | -0.41 | 5.09E-01 | 9.11E-01 |
| <b>TNFSF9</b>      | -1.02 | 1.17E-01 | 1.00E+00 | -0.63 | 5.09E-01 | 9.11E-01 |
| <b>MOXD1</b>       | 0.03  | 9.53E-01 | 1.00E+00 | 0.33  | 5.09E-01 | 9.11E-01 |
| <b>FNDC11</b>      | -1.88 | 1.26E-01 | 1.00E+00 | -0.76 | 5.09E-01 | 9.11E-01 |
| <b>YIPF1</b>       | 0.16  | 4.40E-01 | 1.00E+00 | -0.07 | 5.09E-01 | 9.11E-01 |
| <b>XLOC_001415</b> | 0.58  | 5.08E-01 | 1.00E+00 | 0.74  | 5.09E-01 | 9.12E-01 |
| <b>AC006042.2</b>  | 0.48  | 8.76E-01 | 1.00E+00 | 0.39  | 5.09E-01 | 9.12E-01 |
| <b>ANP32A</b>      | 0.10  | 7.36E-01 | 1.00E+00 | 0.17  | 5.09E-01 | 9.12E-01 |
| <b>PSMG1</b>       | 0.15  | 5.51E-01 | 1.00E+00 | -0.17 | 5.09E-01 | 9.12E-01 |
| <b>LMBRD1</b>      | 0.28  | 1.92E-01 | 1.00E+00 | -0.24 | 5.09E-01 | 9.12E-01 |
| <b>MUC7</b>        | -0.47 | 7.16E-01 | 1.00E+00 | -0.57 | 5.09E-01 | 9.12E-01 |
| <b>CENPJ</b>       | -0.40 | 2.24E-01 | 1.00E+00 | 0.27  | 5.09E-01 | 9.12E-01 |
| <b>MYBL1</b>       | -0.22 | 6.21E-01 | 1.00E+00 | -0.46 | 5.10E-01 | 9.12E-01 |
| <b>AL138724.1</b>  | -0.77 | 3.53E-01 | 1.00E+00 | 0.38  | 5.10E-01 | 9.12E-01 |
| <b>GRIK2</b>       | -0.20 | 6.16E-01 | 1.00E+00 | -0.47 | 5.10E-01 | 9.12E-01 |
| <b>FAR1</b>        | 0.10  | 7.59E-01 | 1.00E+00 | -0.16 | 5.10E-01 | 9.12E-01 |
| <b>AC006252.1</b>  | -1.57 | 8.41E-02 | 1.00E+00 | -0.68 | 5.10E-01 | 9.12E-01 |

|                   |       |          |          |       |          |          |
|-------------------|-------|----------|----------|-------|----------|----------|
| <b>ZNF248</b>     | 0.43  | 2.47E-01 | 1.00E+00 | -0.29 | 5.10E-01 | 9.12E-01 |
| <b>ACTN1-AS1</b>  | -1.00 | 7.69E-01 | 1.00E+00 | -0.91 | 5.10E-01 | 9.12E-01 |
| <b>HDHD5-AS1</b>  | -0.18 | 8.79E-01 | 1.00E+00 | -0.52 | 5.10E-01 | 9.12E-01 |
| <b>AL590428.1</b> | -0.56 | 2.42E-01 | 1.00E+00 | 0.42  | 5.10E-01 | 9.12E-01 |
| <b>POMGNT1</b>    | -0.07 | 7.46E-01 | 1.00E+00 | -0.30 | 5.10E-01 | 9.12E-01 |
| <b>CHRM5</b>      | -2.50 | 4.61E-02 | 1.00E+00 | -0.82 | 5.10E-01 | 9.12E-01 |
| <b>ABCC6</b>      | 1.96  | 5.48E-02 | 1.00E+00 | -0.51 | 5.10E-01 | 9.12E-01 |
| <b>AC139795.3</b> | 0.57  | 5.70E-01 | 1.00E+00 | -0.59 | 5.10E-01 | 9.12E-01 |
| <b>LDLRAD4</b>    | 0.54  | 2.95E-01 | 1.00E+00 | 0.27  | 5.10E-01 | 9.12E-01 |
| <b>MAGED2</b>     | -0.16 | 5.23E-01 | 1.00E+00 | 0.12  | 5.10E-01 | 9.12E-01 |
| <b>DDX47</b>      | 1.27  | 6.79E-01 | 1.00E+00 | -0.86 | 5.10E-01 | 9.12E-01 |
| <b>HNRNPA1P35</b> | 0.40  | 7.67E-01 | 1.00E+00 | -0.33 | 5.10E-01 | 9.12E-01 |
| <b>G39214</b>     | 0.41  | 6.92E-01 | 1.00E+00 | 0.36  | 5.10E-01 | 9.12E-01 |
| <b>LINC00638</b>  | -0.79 | 2.64E-01 | 1.00E+00 | -0.83 | 5.10E-01 | 9.12E-01 |
| <b>PRDM2</b>      | -0.23 | 2.54E-01 | 1.00E+00 | 0.21  | 5.10E-01 | 9.12E-01 |
| <b>DAG1</b>       | -0.12 | 5.65E-01 | 1.00E+00 | 0.21  | 5.10E-01 | 9.12E-01 |
| <b>SOD3</b>       | 0.69  | 7.07E-02 | 1.00E+00 | 0.52  | 5.10E-01 | 9.12E-01 |
| <b>USHBP1</b>     | 0.37  | 4.68E-01 | 1.00E+00 | -0.48 | 5.10E-01 | 9.12E-01 |
| <b>UFC1</b>       | -0.08 | 7.72E-01 | 1.00E+00 | -0.19 | 5.10E-01 | 9.12E-01 |
| <b>ARHGEF15</b>   | 0.06  | 9.01E-01 | 1.00E+00 | 0.44  | 5.11E-01 | 9.12E-01 |
| <b>MICU1</b>      | 0.02  | 9.27E-01 | 1.00E+00 | 0.13  | 5.11E-01 | 9.12E-01 |
| <b>SF3A2</b>      | -0.44 | 1.39E-01 | 1.00E+00 | 0.34  | 5.11E-01 | 9.12E-01 |
| <b>AC024293.1</b> | -0.24 | 5.36E-01 | 1.00E+00 | 0.30  | 5.11E-01 | 9.12E-01 |
| <b>PRDM4</b>      | -0.11 | 5.80E-01 | 1.00E+00 | 0.28  | 5.11E-01 | 9.12E-01 |
| <b>BIRC6</b>      | -0.15 | 4.12E-01 | 1.00E+00 | 0.18  | 5.11E-01 | 9.12E-01 |
| <b>ATG5</b>       | 0.24  | 2.40E-01 | 1.00E+00 | -0.16 | 5.11E-01 | 9.12E-01 |
| <b>AC131009.1</b> | -0.75 | 7.58E-01 | 1.00E+00 | 0.63  | 5.11E-01 | 9.12E-01 |
| <b>PTAR1</b>      | 0.11  | 7.24E-01 | 1.00E+00 | -0.12 | 5.11E-01 | 9.12E-01 |
| <b>CD200R1</b>    | -0.38 | 4.31E-01 | 1.00E+00 | 0.31  | 5.11E-01 | 9.12E-01 |
| <b>AL590399.1</b> | 0.71  | 5.68E-01 | 1.00E+00 | -0.51 | 5.11E-01 | 9.12E-01 |
| <b>PDCD6IPP1</b>  | -2.12 | 3.06E-01 | 1.00E+00 | 0.40  | 5.11E-01 | 9.12E-01 |
| <b>ZNF789</b>     | 0.05  | 8.62E-01 | 1.00E+00 | -0.25 | 5.11E-01 | 9.12E-01 |

|                      |       |          |          |       |          |          |
|----------------------|-------|----------|----------|-------|----------|----------|
| <b>CTD-2145A24.3</b> | 0.32  | 8.33E-01 | 1.00E+00 | -0.61 | 5.11E-01 | 9.12E-01 |
| <b>COX17P1</b>       | NA    | NA       | NA       | -0.51 | 5.11E-01 | 9.12E-01 |
| <b>AL157400.3</b>    | 0.63  | 6.98E-01 | 1.00E+00 | -0.82 | 5.11E-01 | 9.12E-01 |
| <b>AC019171.1</b>    | 3.16  | 3.44E-01 | 1.00E+00 | 0.67  | 5.11E-01 | 9.12E-01 |
| <b>AMH</b>           | -1.52 | 4.47E-01 | 1.00E+00 | 0.80  | 5.11E-01 | 9.12E-01 |
| <b>AL645504.1</b>    | -0.02 | 9.94E-01 | 1.00E+00 | -0.97 | 5.11E-01 | 9.12E-01 |
| <b>BASP1-AS1</b>     | 0.16  | 8.85E-01 | 1.00E+00 | -0.93 | 5.11E-01 | 9.12E-01 |
| <b>AL109811.3</b>    | 2.72  | 1.47E-01 | 1.00E+00 | -0.42 | 5.11E-01 | 9.12E-01 |
| <b>ARHGAP5</b>       | -0.13 | 5.88E-01 | 1.00E+00 | -0.15 | 5.11E-01 | 9.12E-01 |
| <b>PIH1D2</b>        | -0.33 | 5.12E-01 | 1.00E+00 | -0.32 | 5.11E-01 | 9.12E-01 |
| <b>AL606763.1</b>    | -3.07 | 1.34E-01 | 1.00E+00 | 0.89  | 5.11E-01 | 9.12E-01 |
| <b>G26658</b>        | -0.26 | 8.60E-01 | 1.00E+00 | -0.70 | 5.11E-01 | 9.12E-01 |
| <b>PTCD2</b>         | 0.12  | 5.56E-01 | 1.00E+00 | 0.19  | 5.11E-01 | 9.12E-01 |
| <b>SIGLEC11</b>      | -2.36 | 6.43E-02 | 1.00E+00 | 1.03  | 5.12E-01 | 9.12E-01 |
| <b>TNFAIP2</b>       | -0.14 | 7.59E-01 | 1.00E+00 | 0.48  | 5.12E-01 | 9.12E-01 |
| <b>MSRA</b>          | -0.30 | 2.82E-01 | 1.00E+00 | 0.20  | 5.12E-01 | 9.12E-01 |
| <b>SMAGP</b>         | -0.34 | 2.75E-01 | 1.00E+00 | -0.19 | 5.12E-01 | 9.12E-01 |
| <b>ERAP2</b>         | 0.23  | 8.45E-01 | 1.00E+00 | 0.38  | 5.12E-01 | 9.12E-01 |
| <b>IGKV2D-28</b>     | 4.11  | 1.01E-02 | 6.26E-01 | 2.07  | 5.12E-01 | 9.12E-01 |
| <b>PODXL</b>         | 0.06  | 9.04E-01 | 1.00E+00 | 0.35  | 5.12E-01 | 9.12E-01 |
| <b>AFDN-DT</b>       | 1.16  | 1.24E-01 | 1.00E+00 | -0.25 | 5.12E-01 | 9.12E-01 |
| <b>RDH8</b>          | 2.43  | 4.71E-01 | 1.00E+00 | -1.26 | 5.12E-01 | 9.12E-01 |
| <b>C9orf16</b>       | -0.33 | 1.90E-01 | 1.00E+00 | 0.15  | 5.12E-01 | 9.12E-01 |
| <b>PLD5</b>          | 0.36  | 6.98E-01 | 1.00E+00 | -0.72 | 5.12E-01 | 9.12E-01 |
| <b>H1FX-AS1</b>      | -0.15 | 8.23E-01 | 1.00E+00 | -0.34 | 5.12E-01 | 9.12E-01 |
| <b>XLOC_006941</b>   | -2.04 | 2.77E-01 | 1.00E+00 | 0.94  | 5.12E-01 | 9.12E-01 |
| <b>ASB14</b>         | 0.67  | 5.00E-01 | 1.00E+00 | 0.29  | 5.12E-01 | 9.12E-01 |
| <b>EIF4A2P1</b>      | 0.41  | 7.98E-01 | 1.00E+00 | 0.68  | 5.12E-01 | 9.12E-01 |
| <b>TUBB8P12</b>      | 1.68  | 3.44E-01 | 1.00E+00 | -0.61 | 5.12E-01 | 9.12E-01 |
| <b>FZD8</b>          | -0.40 | 3.84E-01 | 1.00E+00 | 0.56  | 5.12E-01 | 9.12E-01 |
| <b>HSPA14</b>        | -0.10 | 6.79E-01 | 1.00E+00 | 0.11  | 5.12E-01 | 9.12E-01 |
| <b>RSL24D1P6</b>     | -1.26 | 3.22E-01 | 1.00E+00 | 0.71  | 5.12E-01 | 9.12E-01 |

|                    |       |          |          |       |          |          |
|--------------------|-------|----------|----------|-------|----------|----------|
| <b>FAM83D</b>      | 0.30  | 5.55E-01 | 1.00E+00 | -0.38 | 5.12E-01 | 9.12E-01 |
| <b>TCTEX1D2</b>    | -1.22 | 4.63E-01 | 1.00E+00 | -0.52 | 5.12E-01 | 9.12E-01 |
| <b>ACTA2-AS1</b>   | -1.81 | 5.86E-01 | 1.00E+00 | 0.56  | 5.12E-01 | 9.12E-01 |
| <b>GTPBP1</b>      | -0.26 | 2.85E-01 | 1.00E+00 | 0.38  | 5.13E-01 | 9.12E-01 |
| <b>ZNF770</b>      | 0.04  | 9.02E-01 | 1.00E+00 | -0.24 | 5.13E-01 | 9.12E-01 |
| <b>AC008440.1</b>  | 0.39  | 8.39E-01 | 1.00E+00 | 0.73  | 5.13E-01 | 9.13E-01 |
| <b>MAGI2</b>       | 0.07  | 8.55E-01 | 1.00E+00 | -0.32 | 5.13E-01 | 9.13E-01 |
| <b>TDP2</b>        | 0.02  | 8.98E-01 | 1.00E+00 | 0.11  | 5.13E-01 | 9.13E-01 |
| <b>PNKP</b>        | -0.22 | 4.17E-01 | 1.00E+00 | 0.18  | 5.13E-01 | 9.13E-01 |
| <b>DERA</b>        | -0.15 | 5.08E-01 | 1.00E+00 | -0.21 | 5.13E-01 | 9.13E-01 |
| <b>LINC01208</b>   | -2.09 | 5.41E-01 | 1.00E+00 | 1.18  | 5.13E-01 | 9.13E-01 |
| <b>PDIA3</b>       | -0.06 | 7.23E-01 | 1.00E+00 | 0.08  | 5.13E-01 | 9.13E-01 |
| <b>AL133445.2</b>  | 0.30  | 9.13E-01 | 1.00E+00 | 0.76  | 5.13E-01 | 9.13E-01 |
| <b>ZNF41</b>       | -0.21 | 2.33E-01 | 1.00E+00 | -0.18 | 5.13E-01 | 9.13E-01 |
| <b>AC008494.1</b>  | -2.47 | 2.25E-01 | 1.00E+00 | -0.77 | 5.13E-01 | 9.13E-01 |
| <b>AC004922.1</b>  | 0.42  | 8.41E-01 | 1.00E+00 | -0.87 | 5.13E-01 | 9.13E-01 |
| <b>XLOC_013770</b> | -0.28 | 7.60E-01 | 1.00E+00 | 0.47  | 5.13E-01 | 9.13E-01 |
| <b>FLI1</b>        | 0.25  | 5.70E-01 | 1.00E+00 | 0.40  | 5.13E-01 | 9.13E-01 |
| <b>AC092162.2</b>  | -1.34 | 2.60E-01 | 1.00E+00 | 0.73  | 5.13E-01 | 9.13E-01 |
| <b>ZNF24</b>       | 0.07  | 7.09E-01 | 1.00E+00 | 0.09  | 5.13E-01 | 9.13E-01 |
| <b>ALOX12B</b>     | 0.14  | 8.31E-01 | 1.00E+00 | 0.46  | 5.14E-01 | 9.13E-01 |
| <b>BUD13P1</b>     | -2.36 | 1.35E-01 | 1.00E+00 | -0.98 | 5.14E-01 | 9.13E-01 |
| <b>PSMA3-AS1</b>   | 0.11  | 6.28E-01 | 1.00E+00 | -0.13 | 5.14E-01 | 9.13E-01 |
| <b>GABPB2</b>      | -0.05 | 8.42E-01 | 1.00E+00 | -0.22 | 5.14E-01 | 9.13E-01 |
| <b>SLC38A4</b>     | -1.37 | 3.75E-03 | 3.33E-01 | 0.39  | 5.14E-01 | 9.13E-01 |
| <b>AC004908.3</b>  | -1.32 | 6.96E-01 | 1.00E+00 | 0.90  | 5.14E-01 | 9.13E-01 |
| <b>ZFP62</b>       | -0.26 | 2.53E-01 | 1.00E+00 | -0.15 | 5.14E-01 | 9.13E-01 |
| <b>AKAP6</b>       | -0.67 | 7.66E-02 | 1.00E+00 | -0.39 | 5.14E-01 | 9.14E-01 |
| <b>RPS20P14</b>    | 0.22  | 7.98E-01 | 1.00E+00 | -0.46 | 5.14E-01 | 9.14E-01 |
| <b>SPNS2</b>       | -0.04 | 9.23E-01 | 1.00E+00 | 0.35  | 5.14E-01 | 9.14E-01 |
| <b>PHF7</b>        | -0.04 | 8.86E-01 | 1.00E+00 | -0.21 | 5.14E-01 | 9.14E-01 |
| <b>SLC9A2</b>      | -0.80 | 2.49E-01 | 1.00E+00 | -0.56 | 5.14E-01 | 9.14E-01 |

|                   |       |          |          |       |          |          |
|-------------------|-------|----------|----------|-------|----------|----------|
| <b>RNASEL</b>     | 0.05  | 8.77E-01 | 1.00E+00 | 0.19  | 5.14E-01 | 9.14E-01 |
| <b>STAT6</b>      | -0.16 | 5.09E-01 | 1.00E+00 | 0.26  | 5.14E-01 | 9.14E-01 |
| <b>MYO18A</b>     | -0.40 | 1.90E-01 | 1.00E+00 | 0.41  | 5.14E-01 | 9.14E-01 |
| <b>ARRDC3</b>     | 0.41  | 4.99E-02 | 1.00E+00 | 0.21  | 5.14E-01 | 9.14E-01 |
| <b>CAB39</b>      | -0.13 | 6.19E-01 | 1.00E+00 | -0.25 | 5.14E-01 | 9.14E-01 |
| <b>ANTXR2</b>     | 0.71  | 7.76E-02 | 1.00E+00 | 0.38  | 5.14E-01 | 9.14E-01 |
| <b>DDX11</b>      | 0.41  | 2.10E-01 | 1.00E+00 | 0.30  | 5.15E-01 | 9.14E-01 |
| <b>VSTM2L</b>     | -0.75 | 4.68E-02 | 1.00E+00 | 0.55  | 5.15E-01 | 9.14E-01 |
| <b>AL591438.2</b> | -0.72 | 8.35E-01 | 1.00E+00 | 0.81  | 5.15E-01 | 9.14E-01 |
| <b>CLDN19</b>     | -0.36 | 6.60E-01 | 1.00E+00 | -0.87 | 5.15E-01 | 9.14E-01 |
| <b>ADGRG6</b>     | 0.30  | 3.63E-01 | 1.00E+00 | -0.28 | 5.15E-01 | 9.14E-01 |
| <b>MCOLN2</b>     | -0.37 | 6.55E-01 | 1.00E+00 | 0.61  | 5.15E-01 | 9.14E-01 |
| <b>HIGD1AP1</b>   | -0.81 | 8.14E-01 | 1.00E+00 | 0.53  | 5.15E-01 | 9.14E-01 |
| <b>LCMT1-AS2</b>  | 0.16  | 8.98E-01 | 1.00E+00 | 0.93  | 5.15E-01 | 9.14E-01 |
| <b>MAGT1</b>      | 0.02  | 9.10E-01 | 1.00E+00 | 0.17  | 5.15E-01 | 9.14E-01 |
| <b>CRIP1</b>      | 0.56  | 3.95E-01 | 1.00E+00 | 0.33  | 5.15E-01 | 9.14E-01 |
| <b>ERICH1</b>     | -0.22 | 3.85E-01 | 1.00E+00 | 0.13  | 5.15E-01 | 9.14E-01 |
| <b>G34413</b>     | -0.29 | 8.05E-01 | 1.00E+00 | -0.49 | 5.15E-01 | 9.14E-01 |
| <b>AP001877.1</b> | -0.81 | 2.81E-01 | 1.00E+00 | 0.30  | 5.15E-01 | 9.14E-01 |
| <b>ZNF821</b>     | -0.52 | 4.15E-01 | 1.00E+00 | -0.21 | 5.15E-01 | 9.14E-01 |
| <b>AL731533.2</b> | -1.97 | 5.09E-01 | 1.00E+00 | -0.98 | 5.16E-01 | 9.14E-01 |
| <b>G29539</b>     | 1.16  | 2.43E-01 | 1.00E+00 | 0.73  | 5.16E-01 | 9.14E-01 |
| <b>EIF4E</b>      | 0.09  | 7.08E-01 | 1.00E+00 | -0.18 | 5.16E-01 | 9.14E-01 |
| <b>FLRT2</b>      | 0.24  | 5.65E-01 | 1.00E+00 | 0.24  | 5.16E-01 | 9.14E-01 |
| <b>INAVA</b>      | -0.26 | 5.49E-01 | 1.00E+00 | -0.42 | 5.16E-01 | 9.14E-01 |
| <b>LAMTOR3</b>    | 0.29  | 8.66E-02 | 1.00E+00 | -0.21 | 5.16E-01 | 9.14E-01 |
| <b>OR2A20P</b>    | 0.51  | 3.84E-01 | 1.00E+00 | -0.32 | 5.16E-01 | 9.14E-01 |
| <b>LINC01088</b>  | -0.99 | 3.01E-01 | 1.00E+00 | -0.52 | 5.16E-01 | 9.14E-01 |
| <b>AC010359.1</b> | -1.53 | 3.16E-01 | 1.00E+00 | -0.84 | 5.16E-01 | 9.14E-01 |
| <b>THRA</b>       | -0.09 | 7.71E-01 | 1.00E+00 | 0.34  | 5.16E-01 | 9.14E-01 |
| <b>PIGL</b>       | -0.36 | 1.70E-01 | 1.00E+00 | -0.17 | 5.16E-01 | 9.14E-01 |
| <b>DYNLT1</b>     | -0.15 | 4.44E-01 | 1.00E+00 | 0.15  | 5.16E-01 | 9.14E-01 |

|                    |       |          |          |       |          |          |
|--------------------|-------|----------|----------|-------|----------|----------|
| <b>PRKCH</b>       | 0.36  | 6.85E-02 | 1.00E+00 | 0.11  | 5.16E-01 | 9.15E-01 |
| <b>RBM41</b>       | -0.18 | 4.44E-01 | 1.00E+00 | -0.16 | 5.16E-01 | 9.15E-01 |
| <b>AL359710.1</b>  | 1.68  | 1.52E-01 | 1.00E+00 | -0.44 | 5.16E-01 | 9.15E-01 |
| <b>TMEM238</b>     | -0.19 | 5.74E-01 | 1.00E+00 | -0.67 | 5.16E-01 | 9.15E-01 |
| <b>AL133523.1</b>  | -1.21 | 4.66E-01 | 1.00E+00 | -0.51 | 5.16E-01 | 9.15E-01 |
| <b>KLF6</b>        | 0.23  | 4.05E-01 | 1.00E+00 | 0.15  | 5.16E-01 | 9.15E-01 |
| <b>MDM1</b>        | 0.22  | 4.73E-01 | 1.00E+00 | -0.27 | 5.16E-01 | 9.15E-01 |
| <b>RTN2</b>        | -0.47 | 4.36E-02 | 1.00E+00 | 0.15  | 5.17E-01 | 9.15E-01 |
| <b>ARHGEF33</b>    | 0.09  | 9.30E-01 | 1.00E+00 | -0.56 | 5.17E-01 | 9.15E-01 |
| <b>WNK1</b>        | -0.22 | 3.68E-01 | 1.00E+00 | 0.24  | 5.17E-01 | 9.15E-01 |
| <b>XCR1</b>        | 0.10  | 8.76E-01 | 1.00E+00 | 0.43  | 5.17E-01 | 9.15E-01 |
| <b>AC114341.1</b>  | -2.07 | 1.32E-01 | 1.00E+00 | 0.70  | 5.17E-01 | 9.15E-01 |
| <b>RIMKLB</b>      | 0.19  | 5.67E-01 | 1.00E+00 | 0.18  | 5.17E-01 | 9.15E-01 |
| <b>SDHAP1</b>      | 0.09  | 8.46E-01 | 1.00E+00 | 0.22  | 5.17E-01 | 9.15E-01 |
| <b>FMO3</b>        | -0.55 | 3.27E-01 | 1.00E+00 | 0.54  | 5.17E-01 | 9.15E-01 |
| <b>AC244034.3</b>  | -0.11 | 9.74E-01 | 1.00E+00 | 1.04  | 5.17E-01 | 9.15E-01 |
| <b>BIK</b>         | -0.02 | 9.74E-01 | 1.00E+00 | 0.33  | 5.17E-01 | 9.15E-01 |
| <b>AC021016.2</b>  | -0.04 | 8.82E-01 | 1.00E+00 | 0.32  | 5.17E-01 | 9.15E-01 |
| <b>HHATL</b>       | -1.88 | 3.13E-02 | 1.00E+00 | -0.74 | 5.17E-01 | 9.15E-01 |
| <b>HMGNA4</b>      | 0.03  | 8.81E-01 | 1.00E+00 | -0.09 | 5.17E-01 | 9.15E-01 |
| <b>G39184</b>      | -0.17 | 9.61E-01 | 1.00E+00 | -0.87 | 5.17E-01 | 9.15E-01 |
| <b>C19orf47</b>    | -0.49 | 2.66E-02 | 9.50E-01 | 0.26  | 5.17E-01 | 9.15E-01 |
| <b>LINC01569</b>   | -0.11 | 8.18E-01 | 1.00E+00 | -0.44 | 5.17E-01 | 9.15E-01 |
| <b>XLOC_003985</b> | 0.23  | 9.33E-01 | 1.00E+00 | -0.79 | 5.17E-01 | 9.15E-01 |
| <b>GLRX2</b>       | 0.24  | 2.09E-01 | 1.00E+00 | -0.20 | 5.17E-01 | 9.15E-01 |
| <b>ATP5MC2</b>     | -0.16 | 3.67E-01 | 1.00E+00 | -0.19 | 5.17E-01 | 9.15E-01 |
| <b>EGFR</b>        | -0.19 | 4.33E-01 | 1.00E+00 | -0.21 | 5.17E-01 | 9.15E-01 |
| <b>CRLF3</b>       | 0.39  | 2.17E-01 | 1.00E+00 | 0.19  | 5.18E-01 | 9.15E-01 |
| <b>HCCS</b>        | 0.09  | 6.56E-01 | 1.00E+00 | -0.16 | 5.18E-01 | 9.16E-01 |
| <b>SNTA1</b>       | -0.11 | 7.38E-01 | 1.00E+00 | -0.40 | 5.18E-01 | 9.16E-01 |
| <b>CHIT1</b>       | 0.27  | 8.35E-01 | 1.00E+00 | 2.03  | 5.18E-01 | 9.16E-01 |
| <b>G31837</b>      | 0.04  | 9.78E-01 | 1.00E+00 | -0.53 | 5.18E-01 | 9.16E-01 |

|                    |       |          |          |       |          |          |
|--------------------|-------|----------|----------|-------|----------|----------|
| <b>AC126175.1</b>  | -0.41 | 7.92E-01 | 1.00E+00 | 0.79  | 5.18E-01 | 9.16E-01 |
| <b>AC006077.2</b>  | -0.17 | 9.01E-01 | 1.00E+00 | -0.49 | 5.18E-01 | 9.16E-01 |
| <b>MYEOV</b>       | 0.34  | 5.85E-01 | 1.00E+00 | -0.40 | 5.18E-01 | 9.16E-01 |
| <b>SLAMF6</b>      | -1.39 | 1.23E-01 | 1.00E+00 | 2.03  | 5.18E-01 | 9.16E-01 |
| <b>OMG</b>         | -0.37 | 7.26E-01 | 1.00E+00 | 0.69  | 5.18E-01 | 9.16E-01 |
| <b>AC011330.2</b>  | -0.07 | 9.24E-01 | 1.00E+00 | -0.84 | 5.18E-01 | 9.16E-01 |
| <b>RIBC1</b>       | -0.36 | 3.04E-01 | 1.00E+00 | -0.29 | 5.18E-01 | 9.16E-01 |
| <b>ANKRD29</b>     | 0.07  | 8.74E-01 | 1.00E+00 | -0.34 | 5.18E-01 | 9.16E-01 |
| <b>HNRNPA1P27</b>  | 0.27  | 7.20E-01 | 1.00E+00 | 0.41  | 5.18E-01 | 9.16E-01 |
| <b>NHLRC4</b>      | 0.34  | 6.43E-01 | 1.00E+00 | 0.73  | 5.18E-01 | 9.16E-01 |
| <b>AC117395.1</b>  | 0.29  | 7.78E-01 | 1.00E+00 | 0.77  | 5.18E-01 | 9.16E-01 |
| <b>METTL2A</b>     | -0.22 | 3.82E-01 | 1.00E+00 | 0.18  | 5.18E-01 | 9.16E-01 |
| <b>XLOC_000152</b> | -1.60 | 3.33E-01 | 1.00E+00 | 0.68  | 5.18E-01 | 9.16E-01 |
| <b>TIMM8BP2</b>    | 0.56  | 8.71E-01 | 1.00E+00 | -0.62 | 5.19E-01 | 9.16E-01 |
| <b>BNIP3P1</b>     | -0.36 | 8.31E-01 | 1.00E+00 | -0.45 | 5.19E-01 | 9.16E-01 |
| <b>RABGGTB</b>     | 0.37  | 2.18E-01 | 1.00E+00 | 0.14  | 5.19E-01 | 9.16E-01 |
| <b>PNPLA2</b>      | 0.86  | 1.49E-01 | 1.00E+00 | -0.37 | 5.19E-01 | 9.16E-01 |
| <b>MYH2</b>        | 3.15  | 5.19E-02 | 1.00E+00 | -1.08 | 5.19E-01 | 9.16E-01 |
| <b>RAB15</b>       | -0.62 | 2.61E-02 | 9.44E-01 | 0.43  | 5.19E-01 | 9.16E-01 |
| <b>AC009962.1</b>  | -0.52 | 3.47E-01 | 1.00E+00 | 0.47  | 5.19E-01 | 9.16E-01 |
| <b>AL078459.1</b>  | -1.45 | 3.65E-01 | 1.00E+00 | 0.41  | 5.19E-01 | 9.16E-01 |
| <b>XLOC_013235</b> | 0.35  | 6.78E-01 | 1.00E+00 | 0.58  | 5.19E-01 | 9.16E-01 |
| <b>PI4KB</b>       | -0.15 | 3.98E-01 | 1.00E+00 | 0.16  | 5.19E-01 | 9.16E-01 |
| <b>SLC38A10</b>    | -0.16 | 6.53E-01 | 1.00E+00 | 0.41  | 5.19E-01 | 9.16E-01 |
| <b>DPF2</b>        | 0.07  | 7.30E-01 | 1.00E+00 | 0.13  | 5.19E-01 | 9.16E-01 |
| <b>CACNB1</b>      | -0.26 | 5.20E-01 | 1.00E+00 | -0.44 | 5.19E-01 | 9.16E-01 |
| <b>IL1F10</b>      | -0.02 | 9.77E-01 | 1.00E+00 | 0.44  | 5.19E-01 | 9.16E-01 |
| <b>EXOSC10</b>     | -0.13 | 4.85E-01 | 1.00E+00 | 0.12  | 5.19E-01 | 9.16E-01 |
| <b>PMS2P2</b>      | 1.26  | 3.41E-01 | 1.00E+00 | -0.37 | 5.19E-01 | 9.16E-01 |
| <b>LONP1</b>       | -0.13 | 5.52E-01 | 1.00E+00 | 0.35  | 5.19E-01 | 9.16E-01 |
| <b>POP1</b>        | -0.07 | 8.30E-01 | 1.00E+00 | 0.26  | 5.19E-01 | 9.16E-01 |
| <b>AL049775.1</b>  | -1.82 | 1.45E-01 | 1.00E+00 | 0.45  | 5.19E-01 | 9.16E-01 |

|                   |       |          |          |       |          |          |
|-------------------|-------|----------|----------|-------|----------|----------|
| <b>MCF2L</b>      | 0.18  | 2.98E-01 | 1.00E+00 | -0.34 | 5.19E-01 | 9.16E-01 |
| <b>SPTBN5</b>     | -0.48 | 3.91E-01 | 1.00E+00 | 0.42  | 5.19E-01 | 9.16E-01 |
| <b>AP002800.1</b> | -0.56 | 4.54E-01 | 1.00E+00 | 0.45  | 5.19E-01 | 9.16E-01 |
| <b>RABGEF1</b>    | -0.35 | 2.73E-01 | 1.00E+00 | 0.24  | 5.19E-01 | 9.16E-01 |
| <b>AC007389.1</b> | 0.01  | 9.97E-01 | 1.00E+00 | 0.78  | 5.19E-01 | 9.16E-01 |
| <b>TCF21</b>      | -3.50 | 4.56E-02 | 1.00E+00 | -0.87 | 5.19E-01 | 9.16E-01 |
| <b>PFKM</b>       | 0.07  | 8.07E-01 | 1.00E+00 | 0.23  | 5.19E-01 | 9.16E-01 |
| <b>DAPK2</b>      | -0.12 | 7.37E-01 | 1.00E+00 | -0.26 | 5.20E-01 | 9.16E-01 |
| <b>MIR1245A</b>   | 0.03  | 9.93E-01 | 1.00E+00 | 0.84  | 5.20E-01 | 9.16E-01 |
| <b>VAPB</b>       | 0.33  | 3.71E-01 | 1.00E+00 | -0.11 | 5.20E-01 | 9.16E-01 |
| <b>ASB16-AS1</b>  | -0.13 | 7.63E-01 | 1.00E+00 | -0.23 | 5.20E-01 | 9.16E-01 |
| <b>PER1</b>       | -1.02 | 9.46E-02 | 1.00E+00 | -0.36 | 5.20E-01 | 9.16E-01 |
| <b>AC012617.1</b> | 1.38  | 4.76E-01 | 1.00E+00 | -0.79 | 5.20E-01 | 9.16E-01 |
| <b>SLC46A1</b>    | 0.56  | 4.41E-01 | 1.00E+00 | 0.30  | 5.20E-01 | 9.16E-01 |
| <b>RPL41P2</b>    | -0.59 | 4.07E-01 | 1.00E+00 | -0.39 | 5.20E-01 | 9.16E-01 |
| <b>ANXA6</b>      | 0.51  | 3.27E-01 | 1.00E+00 | 0.30  | 5.20E-01 | 9.16E-01 |
| <b>METTL21A</b>   | -0.09 | 7.76E-01 | 1.00E+00 | -0.17 | 5.20E-01 | 9.16E-01 |
| <b>CNN2P9</b>     | -2.16 | 9.06E-02 | 1.00E+00 | -1.06 | 5.20E-01 | 9.16E-01 |
| <b>C1orf105</b>   | -3.18 | 1.56E-02 | 7.78E-01 | -0.70 | 5.20E-01 | 9.16E-01 |
| <b>FAM153A</b>    | 0.83  | 2.40E-01 | 1.00E+00 | -0.44 | 5.20E-01 | 9.16E-01 |
| <b>KDR</b>        | 0.41  | 4.50E-01 | 1.00E+00 | 0.40  | 5.20E-01 | 9.16E-01 |
| <b>ZDHHC16</b>    | 0.09  | 6.63E-01 | 1.00E+00 | -0.26 | 5.20E-01 | 9.17E-01 |
| <b>FOXC1</b>      | -0.46 | 2.98E-01 | 1.00E+00 | 0.32  | 5.20E-01 | 9.17E-01 |
| <b>WDR53</b>      | 0.16  | 6.34E-01 | 1.00E+00 | -0.14 | 5.20E-01 | 9.17E-01 |
| <b>EID3</b>       | -0.32 | 3.72E-01 | 1.00E+00 | 0.25  | 5.20E-01 | 9.17E-01 |
| <b>MPHOSPH10</b>  | -0.30 | 4.25E-02 | 1.00E+00 | -0.11 | 5.21E-01 | 9.17E-01 |
| <b>TPM3P6</b>     | -0.32 | 7.54E-01 | 1.00E+00 | -0.28 | 5.21E-01 | 9.17E-01 |
| <b>WDR44</b>      | 0.28  | 2.79E-01 | 1.00E+00 | -0.20 | 5.21E-01 | 9.17E-01 |
| <b>STEAP4</b>     | 0.64  | 9.67E-02 | 1.00E+00 | -0.32 | 5.21E-01 | 9.17E-01 |
| <b>PHKA1</b>      | -0.06 | 7.77E-01 | 1.00E+00 | -0.50 | 5.21E-01 | 9.17E-01 |
| <b>ERV3-1</b>     | -0.59 | 3.02E-01 | 1.00E+00 | -0.38 | 5.21E-01 | 9.17E-01 |
| <b>ZNF174</b>     | -0.19 | 4.74E-01 | 1.00E+00 | -0.25 | 5.21E-01 | 9.17E-01 |



|                      |       |          |          |       |          |          |
|----------------------|-------|----------|----------|-------|----------|----------|
| <b>NFKBIE</b>        | -0.23 | 4.02E-01 | 1.00E+00 | 0.40  | 5.21E-01 | 9.17E-01 |
| <b>NETO2</b>         | -2.18 | 1.26E-04 | 2.99E-02 | 0.59  | 5.21E-01 | 9.17E-01 |
| <b>DHRS1</b>         | -0.53 | 8.76E-02 | 1.00E+00 | -0.18 | 5.21E-01 | 9.17E-01 |
| <b>PACRGL</b>        | -0.06 | 7.94E-01 | 1.00E+00 | -0.21 | 5.21E-01 | 9.17E-01 |
| <b>ERAL1</b>         | -0.11 | 5.50E-01 | 1.00E+00 | -0.14 | 5.21E-01 | 9.17E-01 |
| <b>RPL23AP32</b>     | 1.68  | 3.65E-01 | 1.00E+00 | -0.82 | 5.21E-01 | 9.17E-01 |
| <b>HAUS7</b>         | -2.67 | 1.10E-01 | 1.00E+00 | 0.55  | 5.21E-01 | 9.17E-01 |
| <b>NUDT10</b>        | 0.02  | 9.74E-01 | 1.00E+00 | -0.47 | 5.21E-01 | 9.17E-01 |
| <b>KIF22</b>         | -0.25 | 4.20E-01 | 1.00E+00 | -0.21 | 5.21E-01 | 9.17E-01 |
| <b>EDF1</b>          | -0.10 | 6.44E-01 | 1.00E+00 | 0.11  | 5.21E-01 | 9.17E-01 |
| <b>INHBB</b>         | 0.51  | 3.03E-01 | 1.00E+00 | 0.35  | 5.21E-01 | 9.17E-01 |
| <b>ABCA8</b>         | 0.75  | 1.81E-01 | 1.00E+00 | 0.35  | 5.22E-01 | 9.17E-01 |
| <b>RASSF5</b>        | -0.36 | 3.92E-01 | 1.00E+00 | 0.28  | 5.22E-01 | 9.17E-01 |
| <b>RBMS3-AS3</b>     | -0.53 | 5.54E-01 | 1.00E+00 | -0.70 | 5.22E-01 | 9.17E-01 |
| <b>AL591848.4</b>    | 0.04  | 9.63E-01 | 1.00E+00 | 0.79  | 5.22E-01 | 9.17E-01 |
| <b>JAG2</b>          | -0.29 | 2.18E-01 | 1.00E+00 | -0.34 | 5.22E-01 | 9.17E-01 |
| <b>UGT1A7</b>        | -1.29 | 2.63E-01 | 1.00E+00 | 0.60  | 5.22E-01 | 9.17E-01 |
| <b>ZNF738</b>        | 0.37  | 4.67E-01 | 1.00E+00 | -0.29 | 5.22E-01 | 9.17E-01 |
| <b>LSS</b>           | 0.22  | 2.40E-01 | 1.00E+00 | -0.21 | 5.22E-01 | 9.17E-01 |
| <b>DYRK2</b>         | -0.18 | 4.02E-01 | 1.00E+00 | 0.30  | 5.22E-01 | 9.17E-01 |
| <b>RP11-343N15.5</b> | 0.39  | 2.74E-01 | 1.00E+00 | -0.21 | 5.22E-01 | 9.17E-01 |
| <b>C3orf38</b>       | -0.13 | 6.31E-01 | 1.00E+00 | -0.10 | 5.22E-01 | 9.17E-01 |
| <b>GDAP2</b>         | 0.44  | 3.16E-02 | 1.00E+00 | -0.15 | 5.22E-01 | 9.17E-01 |
| <b>URB2</b>          | -0.24 | 4.57E-01 | 1.00E+00 | 0.29  | 5.22E-01 | 9.17E-01 |
| <b>AL669831.3</b>    | -3.21 | 3.78E-02 | 1.00E+00 | -0.41 | 5.22E-01 | 9.17E-01 |
| <b>KRT79</b>         | -0.06 | 9.57E-01 | 1.00E+00 | -0.57 | 5.22E-01 | 9.17E-01 |
| <b>BCDIN3D-AS1</b>   | -0.32 | 7.98E-01 | 1.00E+00 | -0.79 | 5.22E-01 | 9.17E-01 |
| <b>ISCA1</b>         | 0.15  | 5.25E-01 | 1.00E+00 | -0.18 | 5.22E-01 | 9.17E-01 |
| <b>KRT15</b>         | 0.27  | 4.72E-01 | 1.00E+00 | -0.36 | 5.22E-01 | 9.17E-01 |
| <b>TPRG1L</b>        | -0.01 | 9.50E-01 | 1.00E+00 | -0.27 | 5.22E-01 | 9.17E-01 |
| <b>GLYATL2</b>       | 1.49  | 1.09E-01 | 1.00E+00 | 0.44  | 5.23E-01 | 9.17E-01 |
| <b>PDIK1L</b>        | 0.05  | 8.86E-01 | 1.00E+00 | -0.20 | 5.23E-01 | 9.17E-01 |

|               |       |          |          |       |          |          |
|---------------|-------|----------|----------|-------|----------|----------|
| NKRF          | -0.18 | 4.42E-01 | 1.00E+00 | 0.19  | 5.23E-01 | 9.17E-01 |
| HCAR3         | -0.26 | 7.34E-01 | 1.00E+00 | 0.37  | 5.23E-01 | 9.17E-01 |
| EPHA1         | -0.15 | 7.56E-01 | 1.00E+00 | 0.38  | 5.23E-01 | 9.17E-01 |
| PKD1P6-NPIPP1 | -3.46 | 3.19E-03 | 2.97E-01 | 0.73  | 5.23E-01 | 9.17E-01 |
| AC009299.3    | 2.14  | 3.77E-01 | 1.00E+00 | -0.58 | 5.23E-01 | 9.17E-01 |
| COG2          | -0.02 | 9.18E-01 | 1.00E+00 | 0.10  | 5.23E-01 | 9.17E-01 |
| PLCB2         | -0.36 | 4.74E-01 | 1.00E+00 | 2.00  | 5.23E-01 | 9.17E-01 |
| KEL           | -1.33 | 1.96E-01 | 1.00E+00 | 0.65  | 5.23E-01 | 9.17E-01 |
| MAD2L2        | -0.34 | 3.07E-02 | 1.00E+00 | 0.10  | 5.23E-01 | 9.17E-01 |
| PMVK          | -0.09 | 7.33E-01 | 1.00E+00 | -0.15 | 5.23E-01 | 9.17E-01 |
| MTX1          | -0.03 | 8.87E-01 | 1.00E+00 | 0.11  | 5.23E-01 | 9.17E-01 |
| AK3P3         | 0.82  | 3.51E-01 | 1.00E+00 | 0.51  | 5.23E-01 | 9.17E-01 |
| DIP2C         | 0.49  | 3.22E-01 | 1.00E+00 | 0.26  | 5.23E-01 | 9.17E-01 |
| TPM3P9        | 0.29  | 3.24E-01 | 1.00E+00 | -0.23 | 5.23E-01 | 9.17E-01 |
| HNRNPLP2      | 0.49  | 6.22E-01 | 1.00E+00 | 0.34  | 5.23E-01 | 9.17E-01 |
| C2orf48       | 0.68  | 6.62E-01 | 1.00E+00 | 0.77  | 5.23E-01 | 9.17E-01 |
| CCHCR1        | -0.04 | 8.57E-01 | 1.00E+00 | 0.14  | 5.23E-01 | 9.17E-01 |
| HECW1         | -0.56 | 5.68E-01 | 1.00E+00 | 0.69  | 5.23E-01 | 9.17E-01 |
| PRIMA1        | 0.13  | 7.50E-01 | 1.00E+00 | 0.42  | 5.23E-01 | 9.17E-01 |
| EIF4A1P10     | 0.54  | 4.85E-01 | 1.00E+00 | 0.37  | 5.23E-01 | 9.17E-01 |
| TYMS          | -0.38 | 5.14E-01 | 1.00E+00 | 0.20  | 5.23E-01 | 9.17E-01 |
| LINC00339     | 0.92  | 4.59E-01 | 1.00E+00 | 0.63  | 5.23E-01 | 9.17E-01 |
| PI3           | -0.55 | 2.99E-01 | 1.00E+00 | 1.99  | 5.23E-01 | 9.17E-01 |
| AC012158.1    | 0.30  | 8.13E-01 | 1.00E+00 | -0.44 | 5.23E-01 | 9.17E-01 |
| RNF212B       | -2.21 | 1.46E-01 | 1.00E+00 | 0.78  | 5.23E-01 | 9.17E-01 |
| AC092115.1    | -0.26 | 8.55E-01 | 1.00E+00 | -0.30 | 5.23E-01 | 9.17E-01 |
| ZNF154        | -0.28 | 7.64E-01 | 1.00E+00 | 0.45  | 5.24E-01 | 9.17E-01 |
| AL353708.1    | -2.19 | 8.76E-02 | 1.00E+00 | -0.60 | 5.24E-01 | 9.17E-01 |
| WDR49         | -2.26 | 3.12E-01 | 1.00E+00 | -0.80 | 5.24E-01 | 9.17E-01 |
| TOMM34        | -0.16 | 4.71E-01 | 1.00E+00 | -0.12 | 5.24E-01 | 9.17E-01 |
| KRT75         | -0.59 | 8.23E-01 | 1.00E+00 | 1.99  | 5.24E-01 | 9.17E-01 |
| AL031282.1    | 2.15  | 2.91E-01 | 1.00E+00 | 0.66  | 5.24E-01 | 9.17E-01 |

|                    |       |          |          |       |          |          |
|--------------------|-------|----------|----------|-------|----------|----------|
| <b>GUCY1A2</b>     | -0.55 | 3.43E-01 | 1.00E+00 | 0.33  | 5.24E-01 | 9.17E-01 |
| <b>BTF3</b>        | -0.19 | 4.65E-01 | 1.00E+00 | 0.11  | 5.24E-01 | 9.17E-01 |
| <b>ZFYVE16</b>     | 0.00  | 9.94E-01 | 1.00E+00 | -0.13 | 5.24E-01 | 9.17E-01 |
| <b>QPCT</b>        | 0.14  | 6.34E-01 | 1.00E+00 | 0.24  | 5.24E-01 | 9.17E-01 |
| <b>DAXX</b>        | 0.03  | 8.80E-01 | 1.00E+00 | 0.10  | 5.24E-01 | 9.17E-01 |
| <b>ZNF23</b>       | 0.24  | 7.60E-01 | 1.00E+00 | -0.45 | 5.24E-01 | 9.17E-01 |
| <b>Z97192.2</b>    | -0.14 | 9.23E-01 | 1.00E+00 | 1.23  | 5.24E-01 | 9.17E-01 |
| <b>ZKSCAN4</b>     | 0.14  | 6.32E-01 | 1.00E+00 | 0.28  | 5.24E-01 | 9.17E-01 |
| <b>ATP6V1G1</b>    | 0.05  | 7.84E-01 | 1.00E+00 | -0.20 | 5.24E-01 | 9.17E-01 |
| <b>XLOC_004501</b> | 0.90  | 2.75E-01 | 1.00E+00 | -0.50 | 5.24E-01 | 9.17E-01 |
| <b>HERC2P4</b>     | 1.08  | 5.51E-01 | 1.00E+00 | 0.77  | 5.24E-01 | 9.17E-01 |
| <b>RABEP1</b>      | 0.07  | 8.31E-01 | 1.00E+00 | 0.14  | 5.24E-01 | 9.17E-01 |
| <b>ZNF845</b>      | -0.16 | 5.96E-01 | 1.00E+00 | 0.21  | 5.24E-01 | 9.17E-01 |
| <b>PDE5A</b>       | 0.25  | 6.48E-01 | 1.00E+00 | 0.27  | 5.24E-01 | 9.17E-01 |
| <b>NAPA-AS1</b>    | 0.83  | 4.94E-01 | 1.00E+00 | 0.45  | 5.24E-01 | 9.17E-01 |
| <b>RPSA</b>        | -0.15 | 5.07E-01 | 1.00E+00 | 0.22  | 5.24E-01 | 9.17E-01 |
| <b>XLOC_011623</b> | -0.75 | 4.03E-01 | 1.00E+00 | 0.48  | 5.24E-01 | 9.18E-01 |
| <b>CDC34</b>       | 0.04  | 8.97E-01 | 1.00E+00 | -0.47 | 5.24E-01 | 9.18E-01 |
| <b>STXBP1</b>      | -0.23 | 5.67E-01 | 1.00E+00 | -0.25 | 5.25E-01 | 9.18E-01 |
| <b>TMEM67</b>      | 0.28  | 3.75E-01 | 1.00E+00 | 0.21  | 5.25E-01 | 9.18E-01 |
| <b>EVI5L</b>       | -0.55 | 5.53E-02 | 1.00E+00 | 0.42  | 5.25E-01 | 9.18E-01 |
| <b>AL133467.1</b>  | 0.17  | 8.23E-01 | 1.00E+00 | 0.43  | 5.25E-01 | 9.18E-01 |
| <b>TRIM29</b>      | -0.33 | 4.50E-01 | 1.00E+00 | -0.35 | 5.25E-01 | 9.18E-01 |
| <b>KIF20B</b>      | -0.16 | 5.75E-01 | 1.00E+00 | -0.22 | 5.25E-01 | 9.18E-01 |
| <b>ATP6V1E1</b>    | 0.08  | 6.03E-01 | 1.00E+00 | 0.08  | 5.25E-01 | 9.18E-01 |
| <b>H2AFZ</b>       | -0.01 | 9.78E-01 | 1.00E+00 | -0.27 | 5.25E-01 | 9.18E-01 |
| <b>TAF5L</b>       | 0.13  | 4.94E-01 | 1.00E+00 | 0.42  | 5.25E-01 | 9.18E-01 |
| <b>CCDC33</b>      | -0.29 | 9.33E-01 | 1.00E+00 | -0.72 | 5.25E-01 | 9.18E-01 |
| <b>POLR3H</b>      | -0.31 | 1.77E-01 | 1.00E+00 | 0.16  | 5.25E-01 | 9.18E-01 |
| <b>UBB</b>         | -0.01 | 9.64E-01 | 1.00E+00 | 0.20  | 5.25E-01 | 9.18E-01 |
| <b>RBBP8</b>       | -0.10 | 6.49E-01 | 1.00E+00 | 0.15  | 5.25E-01 | 9.18E-01 |
| <b>BACE1-AS</b>    | 0.40  | 6.66E-01 | 1.00E+00 | 0.38  | 5.25E-01 | 9.18E-01 |

|                    |       |          |          |       |          |          |
|--------------------|-------|----------|----------|-------|----------|----------|
| <b>TTC28-AS1</b>   | 0.01  | 9.68E-01 | 1.00E+00 | 0.16  | 5.25E-01 | 9.18E-01 |
| <b>Z83843.1</b>    | 0.00  | 9.98E-01 | 1.00E+00 | -0.48 | 5.25E-01 | 9.18E-01 |
| <b>JUNB</b>        | -1.21 | 1.24E-01 | 1.00E+00 | -0.34 | 5.25E-01 | 9.18E-01 |
| <b>AL359752.1</b>  | 1.04  | 2.10E-03 | 2.39E-01 | 0.38  | 5.25E-01 | 9.18E-01 |
| <b>MROH6</b>       | -0.03 | 9.49E-01 | 1.00E+00 | 0.39  | 5.25E-01 | 9.18E-01 |
| <b>AL662795.2</b>  | 0.31  | 2.96E-01 | 1.00E+00 | 0.36  | 5.26E-01 | 9.18E-01 |
| <b>XLOC_006188</b> | 0.02  | 9.83E-01 | 1.00E+00 | -0.52 | 5.26E-01 | 9.18E-01 |
| <b>EEF1DP5</b>     | 2.62  | 3.24E-01 | 1.00E+00 | -1.03 | 5.26E-01 | 9.18E-01 |
| <b>AC073257.2</b>  | -0.85 | 5.82E-01 | 1.00E+00 | -0.84 | 5.26E-01 | 9.18E-01 |
| <b>TBX18</b>       | 0.49  | 2.51E-01 | 1.00E+00 | 0.31  | 5.26E-01 | 9.18E-01 |
| <b>POLR1A</b>      | -0.26 | 2.38E-01 | 1.00E+00 | 0.36  | 5.26E-01 | 9.18E-01 |
| <b>AC007387.1</b>  | 1.38  | 6.90E-01 | 1.00E+00 | -0.66 | 5.26E-01 | 9.18E-01 |
| <b>SLITRK6</b>     | 0.12  | 6.53E-01 | 1.00E+00 | -0.36 | 5.26E-01 | 9.18E-01 |
| <b>KPNA4</b>       | 0.01  | 9.44E-01 | 1.00E+00 | -0.12 | 5.26E-01 | 9.18E-01 |
| <b>ZFP36</b>       | -2.00 | 2.51E-02 | 9.28E-01 | -0.39 | 5.26E-01 | 9.19E-01 |
| <b>AC010761.3</b>  | -0.44 | 8.30E-01 | 1.00E+00 | -0.85 | 5.26E-01 | 9.19E-01 |
| <b>ELP2</b>        | 0.17  | 3.45E-01 | 1.00E+00 | -0.10 | 5.26E-01 | 9.19E-01 |
| <b>LRRFIP1</b>     | -0.27 | 1.38E-01 | 1.00E+00 | 0.14  | 5.26E-01 | 9.19E-01 |
| <b>SLC26A5</b>     | -1.05 | 3.60E-01 | 1.00E+00 | 0.55  | 5.26E-01 | 9.19E-01 |
| <b>LINC00652</b>   | -0.23 | 8.71E-01 | 1.00E+00 | 0.82  | 5.26E-01 | 9.19E-01 |
| <b>AC139491.7</b>  | 0.98  | 3.65E-01 | 1.00E+00 | 0.60  | 5.26E-01 | 9.19E-01 |
| <b>AC133552.2</b>  | -0.22 | 6.93E-01 | 1.00E+00 | -0.33 | 5.26E-01 | 9.19E-01 |
| <b>PLPPR2</b>      | -0.39 | 1.26E-01 | 1.00E+00 | 0.28  | 5.26E-01 | 9.19E-01 |
| <b>MT-RNR1</b>     | 0.03  | 9.33E-01 | 1.00E+00 | -0.22 | 5.26E-01 | 9.19E-01 |
| <b>TESMIN</b>      | -0.23 | 5.70E-01 | 1.00E+00 | 0.38  | 5.26E-01 | 9.19E-01 |
| <b>AP001065.1</b>  | 0.13  | 8.60E-01 | 1.00E+00 | 0.65  | 5.26E-01 | 9.19E-01 |
| <b>NLRP1</b>       | -0.22 | 3.46E-01 | 1.00E+00 | 0.22  | 5.27E-01 | 9.19E-01 |
| <b>ABCB11</b>      | -1.75 | 9.39E-02 | 1.00E+00 | 0.71  | 5.27E-01 | 9.19E-01 |
| <b>EDEM3</b>       | 0.25  | 3.72E-01 | 1.00E+00 | 0.18  | 5.27E-01 | 9.19E-01 |
| <b>SAPCD2</b>      | -0.69 | 2.46E-02 | 9.27E-01 | -0.40 | 5.27E-01 | 9.19E-01 |
| <b>PLEKHG1</b>     | -0.33 | 2.57E-01 | 1.00E+00 | 0.22  | 5.27E-01 | 9.19E-01 |
| <b>SNHG19</b>      | 0.09  | 8.39E-01 | 1.00E+00 | -0.27 | 5.27E-01 | 9.19E-01 |

|               |       |          |          |       |          |          |
|---------------|-------|----------|----------|-------|----------|----------|
| SPTSSA        | -0.02 | 9.03E-01 | 1.00E+00 | -0.22 | 5.27E-01 | 9.19E-01 |
| IGKV1-16      | 1.60  | 6.38E-01 | 1.00E+00 | 1.44  | 5.27E-01 | 9.19E-01 |
| GCSAML        | 0.98  | 1.89E-01 | 1.00E+00 | -0.49 | 5.27E-01 | 9.19E-01 |
| HSPA12B       | -0.13 | 7.77E-01 | 1.00E+00 | 0.34  | 5.27E-01 | 9.19E-01 |
| MADD          | 0.06  | 7.32E-01 | 1.00E+00 | 0.24  | 5.27E-01 | 9.19E-01 |
| POLDIP2       | -0.05 | 7.79E-01 | 1.00E+00 | -0.16 | 5.27E-01 | 9.19E-01 |
| AL136295.7    | 0.24  | 6.70E-01 | 1.00E+00 | -0.34 | 5.27E-01 | 9.19E-01 |
| PRKAB2        | 0.54  | 1.19E-01 | 1.00E+00 | -0.18 | 5.27E-01 | 9.19E-01 |
| MRPS31P4      | -0.03 | 9.79E-01 | 1.00E+00 | 0.33  | 5.27E-01 | 9.19E-01 |
| PKDCC         | 0.72  | 2.61E-01 | 1.00E+00 | 0.49  | 5.27E-01 | 9.19E-01 |
| RDH13         | -0.20 | 6.01E-01 | 1.00E+00 | 0.22  | 5.27E-01 | 9.19E-01 |
| PLS3          | 0.05  | 8.44E-01 | 1.00E+00 | -0.14 | 5.27E-01 | 9.19E-01 |
| G25699        | -0.67 | 2.97E-01 | 1.00E+00 | -0.38 | 5.27E-01 | 9.19E-01 |
| DCAF4         | 0.12  | 6.58E-01 | 1.00E+00 | -0.17 | 5.27E-01 | 9.19E-01 |
| DNP1          | 0.26  | 3.46E-01 | 1.00E+00 | 0.18  | 5.27E-01 | 9.19E-01 |
| RP11-337C18.9 | -0.28 | 7.96E-01 | 1.00E+00 | -0.53 | 5.27E-01 | 9.19E-01 |
| RFC4          | 0.04  | 8.90E-01 | 1.00E+00 | 0.17  | 5.27E-01 | 9.19E-01 |
| SLC16A9       | -1.32 | 1.87E-02 | 8.59E-01 | 1.51  | 5.27E-01 | 9.19E-01 |
| CENPS         | -1.06 | 3.88E-01 | 1.00E+00 | -0.40 | 5.27E-01 | 9.19E-01 |
| ZNF554        | -0.13 | 6.82E-01 | 1.00E+00 | -0.33 | 5.27E-01 | 9.19E-01 |
| AC117409.1    | NA    | NA       | NA       | -0.52 | 5.27E-01 | 9.19E-01 |
| MPDU1         | -0.11 | 6.38E-01 | 1.00E+00 | 0.14  | 5.27E-01 | 9.19E-01 |
| GUSB          | 0.13  | 6.01E-01 | 1.00E+00 | 0.16  | 5.28E-01 | 9.19E-01 |
| AGPAT5        | -0.08 | 7.69E-01 | 1.00E+00 | 0.13  | 5.28E-01 | 9.19E-01 |
| THNSL2        | -0.43 | 4.29E-01 | 1.00E+00 | 0.28  | 5.28E-01 | 9.19E-01 |
| CELF2         | 0.62  | 1.39E-01 | 1.00E+00 | 0.22  | 5.28E-01 | 9.19E-01 |
| CD320         | 0.22  | 6.59E-01 | 1.00E+00 | -0.27 | 5.28E-01 | 9.19E-01 |
| BORCS8        | -0.51 | 1.75E-01 | 1.00E+00 | -0.17 | 5.28E-01 | 9.19E-01 |
| HSD3BP5       | -0.11 | 8.89E-01 | 1.00E+00 | 0.42  | 5.28E-01 | 9.19E-01 |
| TESK2         | -0.04 | 8.58E-01 | 1.00E+00 | 0.19  | 5.28E-01 | 9.19E-01 |
| SLC25A21      | -0.86 | 4.65E-01 | 1.00E+00 | -0.43 | 5.28E-01 | 9.19E-01 |
| ZNF774        | -0.26 | 4.94E-01 | 1.00E+00 | 0.29  | 5.28E-01 | 9.19E-01 |

|               |       |          |          |       |          |          |
|---------------|-------|----------|----------|-------|----------|----------|
| PRPF38A       | 0.21  | 3.03E-01 | 1.00E+00 | -0.09 | 5.28E-01 | 9.19E-01 |
| VSTM4         | 0.33  | 4.14E-01 | 1.00E+00 | 0.31  | 5.28E-01 | 9.19E-01 |
| FAM160B2      | -0.40 | 1.52E-01 | 1.00E+00 | 0.37  | 5.28E-01 | 9.19E-01 |
| MYBPH         | 3.58  | 2.87E-01 | 1.00E+00 | 1.22  | 5.28E-01 | 9.19E-01 |
| SYT8          | -1.29 | 1.95E-02 | 8.74E-01 | -0.50 | 5.28E-01 | 9.19E-01 |
| HMGB1P31      | 1.16  | 1.23E-01 | 1.00E+00 | -0.51 | 5.28E-01 | 9.19E-01 |
| RP11-436G20.1 | 0.19  | 8.84E-01 | 1.00E+00 | -0.44 | 5.28E-01 | 9.19E-01 |
| CD164L2       | -0.27 | 5.41E-01 | 1.00E+00 | 0.31  | 5.28E-01 | 9.19E-01 |
| FXYD7         | -1.34 | 2.52E-01 | 1.00E+00 | 0.46  | 5.28E-01 | 9.19E-01 |
| AC084824.1    | -0.21 | 8.39E-01 | 1.00E+00 | 0.33  | 5.28E-01 | 9.19E-01 |
| CHODL-AS1     | 0.49  | 7.58E-01 | 1.00E+00 | 1.13  | 5.28E-01 | 9.19E-01 |
| PAPOLA        | -0.05 | 8.04E-01 | 1.00E+00 | 0.13  | 5.28E-01 | 9.19E-01 |
| EGR3          | -0.25 | 6.59E-01 | 1.00E+00 | -0.30 | 5.28E-01 | 9.19E-01 |
| IGKV1D-12     | 1.97  | 4.75E-01 | 1.00E+00 | 2.01  | 5.28E-01 | 9.19E-01 |
| SMARCC1       | -0.09 | 7.01E-01 | 1.00E+00 | -0.21 | 5.28E-01 | 9.19E-01 |
| EZR           | -0.19 | 6.42E-01 | 1.00E+00 | 0.21  | 5.29E-01 | 9.19E-01 |
| SNW1          | -0.11 | 5.17E-01 | 1.00E+00 | -0.16 | 5.29E-01 | 9.19E-01 |
| PIGHP1        | -1.25 | 4.35E-01 | 1.00E+00 | -0.48 | 5.29E-01 | 9.19E-01 |
| SNX33         | -0.13 | 5.69E-01 | 1.00E+00 | 0.33  | 5.29E-01 | 9.19E-01 |
| RNF19B        | -0.35 | 1.14E-01 | 1.00E+00 | 0.40  | 5.29E-01 | 9.19E-01 |
| ATP6V1G2      | 0.06  | 9.86E-01 | 1.00E+00 | -0.59 | 5.29E-01 | 9.19E-01 |
| SLC30A10      | -1.02 | 3.97E-01 | 1.00E+00 | 0.74  | 5.29E-01 | 9.19E-01 |
| C2CD4C        | -0.31 | 7.07E-01 | 1.00E+00 | 0.79  | 5.29E-01 | 9.19E-01 |
| PLEKHD1       | 0.23  | 7.74E-01 | 1.00E+00 | -0.48 | 5.29E-01 | 9.19E-01 |
| PSD4          | -0.35 | 1.84E-01 | 1.00E+00 | 0.28  | 5.29E-01 | 9.19E-01 |
| AC138028.6    | -0.89 | 5.43E-01 | 1.00E+00 | 1.10  | 5.29E-01 | 9.19E-01 |
| AC040160.2    | 1.43  | 2.17E-01 | 1.00E+00 | 0.76  | 5.29E-01 | 9.19E-01 |
| MRPL46        | 0.62  | 5.16E-01 | 1.00E+00 | 0.43  | 5.29E-01 | 9.19E-01 |
| ZFAT          | -0.03 | 9.36E-01 | 1.00E+00 | 0.19  | 5.29E-01 | 9.19E-01 |
| AP001350.2    | 0.02  | 9.79E-01 | 1.00E+00 | 0.51  | 5.29E-01 | 9.19E-01 |
| MMP12         | -1.95 | 2.32E-01 | 1.00E+00 | 1.97  | 5.29E-01 | 9.19E-01 |
| AL359644.1    | -2.33 | 1.77E-01 | 1.00E+00 | -0.50 | 5.29E-01 | 9.19E-01 |

|                    |       |          |          |       |          |          |
|--------------------|-------|----------|----------|-------|----------|----------|
| <b>AC123777.1</b>  | -1.80 | 1.21E-01 | 1.00E+00 | 0.70  | 5.29E-01 | 9.19E-01 |
| <b>GRIK3</b>       | -0.31 | 6.00E-01 | 1.00E+00 | 0.65  | 5.29E-01 | 9.19E-01 |
| <b>PSAT1P3</b>     | -0.06 | 9.69E-01 | 1.00E+00 | -0.64 | 5.29E-01 | 9.19E-01 |
| <b>HKR1</b>        | -0.01 | 9.71E-01 | 1.00E+00 | -0.14 | 5.30E-01 | 9.19E-01 |
| <b>TPPP3</b>       | 0.08  | 8.81E-01 | 1.00E+00 | -0.24 | 5.30E-01 | 9.19E-01 |
| <b>APH1B</b>       | 0.22  | 5.72E-01 | 1.00E+00 | 0.25  | 5.30E-01 | 9.19E-01 |
| <b>AC131097.2</b>  | 1.01  | 3.36E-02 | 1.00E+00 | 0.35  | 5.30E-01 | 9.19E-01 |
| <b>AC098650.1</b>  | 2.12  | 5.34E-01 | 1.00E+00 | 0.87  | 5.30E-01 | 9.19E-01 |
| <b>SEMA3F-AS1</b>  | -0.94 | 6.15E-01 | 1.00E+00 | -0.61 | 5.30E-01 | 9.19E-01 |
| <b>EIF4A1P4</b>    | -0.56 | 8.73E-01 | 1.00E+00 | 0.81  | 5.30E-01 | 9.19E-01 |
| <b>AL023807.1</b>  | 0.73  | 6.30E-01 | 1.00E+00 | 0.59  | 5.30E-01 | 9.19E-01 |
| <b>SART3</b>       | -0.10 | 5.82E-01 | 1.00E+00 | 0.11  | 5.30E-01 | 9.19E-01 |
| <b>TRIM8</b>       | -0.16 | 5.57E-01 | 1.00E+00 | 0.35  | 5.30E-01 | 9.19E-01 |
| <b>XLOC_012879</b> | 0.49  | 8.44E-01 | 1.00E+00 | 0.86  | 5.30E-01 | 9.19E-01 |
| <b>AP3B1</b>       | -0.03 | 8.96E-01 | 1.00E+00 | -0.12 | 5.30E-01 | 9.19E-01 |
| <b>XLOC_007614</b> | -1.58 | 5.56E-02 | 1.00E+00 | -0.61 | 5.30E-01 | 9.19E-01 |
| <b>G5143</b>       | 0.96  | 1.68E-01 | 1.00E+00 | 0.66  | 5.30E-01 | 9.19E-01 |
| <b>RPAP2</b>       | -0.28 | 2.47E-01 | 1.00E+00 | -0.14 | 5.30E-01 | 9.19E-01 |
| <b>SIGLEC15</b>    | -0.88 | 4.08E-01 | 1.00E+00 | 0.45  | 5.30E-01 | 9.19E-01 |
| <b>GNPDA2</b>      | 0.12  | 5.58E-01 | 1.00E+00 | -0.19 | 5.30E-01 | 9.19E-01 |
| <b>ALDH1L1-AS2</b> | 1.13  | 6.07E-01 | 1.00E+00 | 0.95  | 5.30E-01 | 9.19E-01 |
| <b>AL035458.1</b>  | -0.67 | 8.48E-01 | 1.00E+00 | -0.39 | 5.30E-01 | 9.19E-01 |
| <b>B3GLCT</b>      | -0.08 | 8.13E-01 | 1.00E+00 | -0.15 | 5.30E-01 | 9.19E-01 |
| <b>PPP3CB-AS1</b>  | -0.21 | 5.95E-01 | 1.00E+00 | -0.24 | 5.30E-01 | 9.19E-01 |
| <b>ZNF485</b>      | 0.10  | 8.39E-01 | 1.00E+00 | -0.25 | 5.30E-01 | 9.19E-01 |
| <b>AL135936.1</b>  | -0.30 | 8.27E-01 | 1.00E+00 | 0.62  | 5.30E-01 | 9.19E-01 |
| <b>ERI2</b>        | -0.07 | 8.25E-01 | 1.00E+00 | 0.17  | 5.30E-01 | 9.19E-01 |
| <b>HYAL2</b>       | -0.30 | 1.35E-01 | 1.00E+00 | 0.24  | 5.30E-01 | 9.19E-01 |
| <b>AC026462.1</b>  | -1.49 | 5.00E-01 | 1.00E+00 | -0.32 | 5.30E-01 | 9.19E-01 |
| <b>NOLC1</b>       | -0.25 | 1.90E-01 | 1.00E+00 | 0.16  | 5.31E-01 | 9.19E-01 |
| <b>PPT2</b>        | 0.10  | 7.36E-01 | 1.00E+00 | -0.14 | 5.31E-01 | 9.19E-01 |
| <b>ATP1A1-AS1</b>  | 0.02  | 9.49E-01 | 1.00E+00 | -0.19 | 5.31E-01 | 9.19E-01 |

|                    |       |          |          |       |          |          |
|--------------------|-------|----------|----------|-------|----------|----------|
| <b>GALK2</b>       | 0.27  | 2.72E-01 | 1.00E+00 | -0.15 | 5.31E-01 | 9.19E-01 |
| <b>AVEN</b>        | 0.05  | 8.18E-01 | 1.00E+00 | -0.30 | 5.31E-01 | 9.19E-01 |
| <b>HOXA10-AS</b>   | -1.53 | 2.23E-01 | 1.00E+00 | 0.35  | 5.31E-01 | 9.19E-01 |
| <b>SLC25A19</b>    | 0.68  | 1.94E-01 | 1.00E+00 | 0.26  | 5.31E-01 | 9.19E-01 |
| <b>STIP1</b>       | -0.04 | 8.45E-01 | 1.00E+00 | 0.11  | 5.31E-01 | 9.19E-01 |
| <b>ANKRD10-IT1</b> | 0.57  | 6.46E-01 | 1.00E+00 | 0.36  | 5.31E-01 | 9.19E-01 |
| <b>UBR5-AS1</b>    | 0.30  | 6.69E-01 | 1.00E+00 | -0.22 | 5.31E-01 | 9.19E-01 |
| <b>AL133384.2</b>  | -1.14 | 7.43E-01 | 1.00E+00 | 0.83  | 5.31E-01 | 9.19E-01 |
| <b>AC108134.4</b>  | -0.70 | 5.81E-01 | 1.00E+00 | -0.59 | 5.31E-01 | 9.19E-01 |
| <b>TPM4</b>        | -0.15 | 4.04E-01 | 1.00E+00 | 0.18  | 5.31E-01 | 9.19E-01 |
| <b>LINC00265</b>   | -0.32 | 6.64E-01 | 1.00E+00 | 0.54  | 5.31E-01 | 9.19E-01 |
| <b>TOB2</b>        | -0.19 | 5.69E-01 | 1.00E+00 | -0.17 | 5.31E-01 | 9.19E-01 |
| <b>PDCD4-AS1</b>   | -0.65 | 2.18E-01 | 1.00E+00 | 0.38  | 5.31E-01 | 9.19E-01 |
| <b>PRAL</b>        | -1.59 | 4.60E-01 | 1.00E+00 | 0.79  | 5.31E-01 | 9.19E-01 |
| <b>MCUB</b>        | -0.01 | 9.79E-01 | 1.00E+00 | -0.21 | 5.31E-01 | 9.19E-01 |
| <b>AC100803.2</b>  | 1.11  | 1.19E-01 | 1.00E+00 | 0.92  | 5.31E-01 | 9.19E-01 |
| <b>IFT43</b>       | -0.18 | 3.61E-01 | 1.00E+00 | -0.18 | 5.31E-01 | 9.19E-01 |
| <b>SIAH3</b>       | -0.86 | 5.47E-01 | 1.00E+00 | 0.75  | 5.31E-01 | 9.19E-01 |
| <b>EDEM2</b>       | 0.10  | 6.55E-01 | 1.00E+00 | 0.16  | 5.31E-01 | 9.19E-01 |
| <b>PELI3</b>       | -0.02 | 9.30E-01 | 1.00E+00 | -0.39 | 5.31E-01 | 9.19E-01 |
| <b>AC061992.1</b>  | -0.46 | 7.39E-01 | 1.00E+00 | 0.78  | 5.31E-01 | 9.19E-01 |
| <b>TATDN2</b>      | 0.11  | 5.65E-01 | 1.00E+00 | 0.25  | 5.31E-01 | 9.19E-01 |
| <b>AC027020.2</b>  | 0.33  | 7.16E-01 | 1.00E+00 | 0.75  | 5.31E-01 | 9.19E-01 |
| <b>XLOC_009592</b> | -2.96 | 1.09E-01 | 1.00E+00 | 0.92  | 5.31E-01 | 9.19E-01 |
| <b>CCT8P1</b>      | 0.62  | 1.07E-01 | 1.00E+00 | 0.25  | 5.31E-01 | 9.19E-01 |
| <b>SPACA6</b>      | 0.56  | 2.08E-01 | 1.00E+00 | -0.24 | 5.31E-01 | 9.19E-01 |
| <b>SNRNP35</b>     | -0.02 | 9.06E-01 | 1.00E+00 | -0.14 | 5.32E-01 | 9.19E-01 |
| <b>DEFB103A</b>    | -1.93 | 5.74E-01 | 1.00E+00 | 0.53  | 5.32E-01 | 9.19E-01 |
| <b>CKMT1A</b>      | -0.57 | 4.97E-02 | 1.00E+00 | -0.31 | 5.32E-01 | 9.19E-01 |
| <b>DDX6</b>        | 0.17  | 3.23E-01 | 1.00E+00 | 0.19  | 5.32E-01 | 9.19E-01 |
| <b>PDS5A</b>       | 0.00  | 9.90E-01 | 1.00E+00 | -0.21 | 5.32E-01 | 9.19E-01 |
| <b>KLRC1</b>       | -3.36 | 1.19E-01 | 1.00E+00 | 0.76  | 5.32E-01 | 9.19E-01 |



|                    |       |          |          |       |          |          |
|--------------------|-------|----------|----------|-------|----------|----------|
| <b>OPRD1</b>       | -0.08 | 9.66E-01 | 1.00E+00 | -0.89 | 5.32E-01 | 9.19E-01 |
| <b>PRRT4</b>       | 3.04  | 3.30E-02 | 1.00E+00 | 0.66  | 5.32E-01 | 9.19E-01 |
| <b>SEMA4B</b>      | -0.54 | 1.32E-01 | 1.00E+00 | 0.32  | 5.32E-01 | 9.19E-01 |
| <b>HOXC11</b>      | -0.41 | 3.23E-01 | 1.00E+00 | 0.19  | 5.32E-01 | 9.19E-01 |
| <b>PYDC1</b>       | -0.40 | 5.12E-01 | 1.00E+00 | 0.42  | 5.32E-01 | 9.19E-01 |
| <b>ARPP21</b>      | -2.47 | 1.23E-01 | 1.00E+00 | 0.91  | 5.32E-01 | 9.19E-01 |
| <b>PDP1</b>        | 0.27  | 3.79E-01 | 1.00E+00 | 0.12  | 5.32E-01 | 9.19E-01 |
| <b>AC011632.1</b>  | -2.33 | 1.95E-01 | 1.00E+00 | -0.67 | 5.32E-01 | 9.19E-01 |
| <b>ALDOA</b>       | -0.09 | 8.60E-01 | 1.00E+00 | 0.44  | 5.32E-01 | 9.19E-01 |
| <b>MKS1</b>        | -0.07 | 6.64E-01 | 1.00E+00 | 0.16  | 5.32E-01 | 9.19E-01 |
| <b>CLSTN1</b>      | -0.26 | 2.94E-01 | 1.00E+00 | 0.32  | 5.32E-01 | 9.19E-01 |
| <b>CASC9</b>       | 1.98  | 3.38E-01 | 1.00E+00 | -1.35 | 5.32E-01 | 9.19E-01 |
| <b>XLOC_013164</b> | -0.22 | 9.28E-01 | 1.00E+00 | -1.14 | 5.32E-01 | 9.19E-01 |
| <b>GPT2</b>        | -0.19 | 5.48E-01 | 1.00E+00 | -0.27 | 5.33E-01 | 9.19E-01 |
| <b>RPL5P5</b>      | -0.58 | 8.67E-01 | 1.00E+00 | 0.64  | 5.33E-01 | 9.19E-01 |
| <b>ID3</b>         | 0.34  | 1.82E-01 | 1.00E+00 | 0.23  | 5.33E-01 | 9.19E-01 |
| <b>C9orf170</b>    | -1.29 | 2.73E-01 | 1.00E+00 | 0.62  | 5.33E-01 | 9.19E-01 |
| <b>KAT14</b>       | 0.06  | 7.19E-01 | 1.00E+00 | 0.11  | 5.33E-01 | 9.19E-01 |
| <b>PUS1</b>        | -0.55 | 6.41E-02 | 1.00E+00 | 0.37  | 5.33E-01 | 9.20E-01 |
| <b>SH2D3C</b>      | -0.06 | 8.94E-01 | 1.00E+00 | 0.35  | 5.33E-01 | 9.20E-01 |
| <b>TRAV12-1</b>    | -1.49 | 3.90E-01 | 1.00E+00 | 0.81  | 5.33E-01 | 9.20E-01 |
| <b>KRR1</b>        | -0.19 | 3.68E-01 | 1.00E+00 | -0.13 | 5.33E-01 | 9.20E-01 |
| <b>LRP10</b>       | -0.07 | 7.52E-01 | 1.00E+00 | 0.30  | 5.33E-01 | 9.20E-01 |
| <b>ID2</b>         | 0.00  | 9.91E-01 | 1.00E+00 | -0.20 | 5.33E-01 | 9.20E-01 |
| <b>INSM1</b>       | -0.64 | 5.15E-01 | 1.00E+00 | -0.66 | 5.33E-01 | 9.20E-01 |
| <b>SAMD4B</b>      | -0.30 | 8.67E-02 | 1.00E+00 | 0.27  | 5.33E-01 | 9.20E-01 |
| <b>GLOD4</b>       | 0.16  | 2.93E-01 | 1.00E+00 | -0.10 | 5.33E-01 | 9.20E-01 |
| <b>TREML3P</b>     | NA    | NA       | NA       | 1.64  | 5.33E-01 | 9.20E-01 |
| <b>H2AFZP3</b>     | -0.37 | 9.15E-01 | 1.00E+00 | -0.47 | 5.33E-01 | 9.20E-01 |
| <b>PTOV1-AS2</b>   | -1.72 | 2.77E-01 | 1.00E+00 | 0.84  | 5.33E-01 | 9.20E-01 |
| <b>HSP90AA2P</b>   | -0.81 | 4.54E-01 | 1.00E+00 | -0.37 | 5.33E-01 | 9.20E-01 |
| <b>TIE1</b>        | 0.15  | 7.69E-01 | 1.00E+00 | 0.44  | 5.33E-01 | 9.20E-01 |

|                    |       |          |          |       |          |          |
|--------------------|-------|----------|----------|-------|----------|----------|
| <b>AC011379.2</b>  | 0.90  | 2.86E-01 | 1.00E+00 | 0.42  | 5.33E-01 | 9.20E-01 |
| <b>BUD13</b>       | -0.07 | 6.75E-01 | 1.00E+00 | 0.17  | 5.33E-01 | 9.20E-01 |
| <b>HYOU1</b>       | -0.16 | 4.38E-01 | 1.00E+00 | 0.38  | 5.34E-01 | 9.20E-01 |
| <b>IARS2</b>       | 0.19  | 2.24E-01 | 1.00E+00 | -0.08 | 5.34E-01 | 9.20E-01 |
| <b>XLOC_012740</b> | -1.72 | 8.89E-02 | 1.00E+00 | -0.30 | 5.34E-01 | 9.20E-01 |
| <b>XLOC_004203</b> | -0.95 | 5.28E-01 | 1.00E+00 | -0.87 | 5.34E-01 | 9.20E-01 |
| <b>AL031963.3</b>  | 0.81  | 4.25E-01 | 1.00E+00 | 0.50  | 5.34E-01 | 9.20E-01 |
| <b>XLOC_005510</b> | -0.21 | 7.51E-01 | 1.00E+00 | -0.57 | 5.34E-01 | 9.20E-01 |
| <b>MYL9</b>        | -0.20 | 7.39E-01 | 1.00E+00 | 0.28  | 5.34E-01 | 9.20E-01 |
| <b>BNC1</b>        | -0.68 | 9.68E-02 | 1.00E+00 | 0.40  | 5.34E-01 | 9.20E-01 |
| <b>ETS2</b>        | -0.35 | 3.83E-01 | 1.00E+00 | 0.20  | 5.34E-01 | 9.20E-01 |
| <b>CCDC15</b>      | -0.31 | 5.53E-01 | 1.00E+00 | -0.27 | 5.34E-01 | 9.20E-01 |
| <b>IGLV2-11</b>    | 4.14  | 2.54E-02 | 9.29E-01 | 1.97  | 5.34E-01 | 9.20E-01 |
| <b>AL358216.1</b>  | -0.74 | 3.44E-01 | 1.00E+00 | 0.61  | 5.34E-01 | 9.20E-01 |
| <b>OGFOD3</b>      | -0.04 | 8.56E-01 | 1.00E+00 | 0.23  | 5.34E-01 | 9.20E-01 |
| <b>RNU6-415P</b>   | -1.90 | 9.91E-02 | 1.00E+00 | 0.57  | 5.34E-01 | 9.20E-01 |
| <b>ADCK2</b>       | 0.01  | 9.70E-01 | 1.00E+00 | -0.22 | 5.34E-01 | 9.20E-01 |
| <b>AC103740.2</b>  | 0.62  | 8.57E-01 | 1.00E+00 | -1.29 | 5.34E-01 | 9.21E-01 |
| <b>HPN</b>         | -0.78 | 3.70E-01 | 1.00E+00 | 0.77  | 5.35E-01 | 9.21E-01 |
| <b>ITGA8</b>       | -0.02 | 9.74E-01 | 1.00E+00 | -0.34 | 5.35E-01 | 9.21E-01 |
| <b>AC093157.2</b>  | -2.94 | 3.86E-01 | 1.00E+00 | 0.58  | 5.35E-01 | 9.21E-01 |
| <b>TSC22D1</b>     | 0.34  | 1.91E-01 | 1.00E+00 | -0.20 | 5.35E-01 | 9.21E-01 |
| <b>ZNRF2</b>       | -0.12 | 6.80E-01 | 1.00E+00 | -0.30 | 5.35E-01 | 9.21E-01 |
| <b>IBSP</b>        | -3.68 | 2.75E-01 | 1.00E+00 | 1.11  | 5.35E-01 | 9.21E-01 |
| <b>AC245884.11</b> | -0.70 | 8.41E-01 | 1.00E+00 | 1.04  | 5.35E-01 | 9.21E-01 |
| <b>LETM1</b>       | -0.23 | 3.25E-01 | 1.00E+00 | 0.16  | 5.35E-01 | 9.21E-01 |
| <b>SMIM12</b>      | 0.00  | 9.81E-01 | 1.00E+00 | 0.10  | 5.35E-01 | 9.21E-01 |
| <b>LINC02454</b>   | -0.22 | 8.41E-01 | 1.00E+00 | -0.52 | 5.35E-01 | 9.21E-01 |
| <b>AL445471.2</b>  | -2.03 | 3.98E-01 | 1.00E+00 | -0.97 | 5.35E-01 | 9.21E-01 |
| <b>CBX3P2</b>      | -0.56 | 2.61E-01 | 1.00E+00 | -0.35 | 5.35E-01 | 9.21E-01 |
| <b>AC073316.3</b>  | -0.33 | 8.31E-01 | 1.00E+00 | 0.71  | 5.35E-01 | 9.21E-01 |
| <b>G19165</b>      | -3.11 | 9.81E-02 | 1.00E+00 | 0.82  | 5.35E-01 | 9.21E-01 |

|                   |       |          |          |       |          |          |
|-------------------|-------|----------|----------|-------|----------|----------|
| <b>AL121760.1</b> | -0.52 | 7.40E-01 | 1.00E+00 | 0.37  | 5.35E-01 | 9.21E-01 |
| <b>AC063960.2</b> | -0.01 | 9.87E-01 | 1.00E+00 | 0.60  | 5.35E-01 | 9.21E-01 |
| <b>NAPG</b>       | 0.15  | 5.76E-01 | 1.00E+00 | -0.17 | 5.35E-01 | 9.21E-01 |
| <b>TMPRSS11E</b>  | -0.81 | 2.94E-01 | 1.00E+00 | -0.46 | 5.35E-01 | 9.21E-01 |
| <b>SGK494</b>     | -0.98 | 4.48E-01 | 1.00E+00 | 0.63  | 5.35E-01 | 9.21E-01 |
| <b>TAGLN3</b>     | -2.85 | 1.65E-01 | 1.00E+00 | 0.75  | 5.36E-01 | 9.21E-01 |
| <b>GOLGA2P8</b>   | -1.37 | 6.93E-01 | 1.00E+00 | -0.76 | 5.36E-01 | 9.21E-01 |
| <b>CEP83-DT</b>   | -0.01 | 9.90E-01 | 1.00E+00 | 0.67  | 5.36E-01 | 9.21E-01 |
| <b>AC025171.2</b> | -0.46 | 4.96E-01 | 1.00E+00 | 0.46  | 5.36E-01 | 9.21E-01 |
| <b>JMJD6</b>      | -0.24 | 3.50E-01 | 1.00E+00 | 0.17  | 5.36E-01 | 9.21E-01 |
| <b>AC142086.6</b> | -0.13 | 8.75E-01 | 1.00E+00 | -0.71 | 5.36E-01 | 9.21E-01 |
| <b>CCND3</b>      | 0.28  | 2.31E-01 | 1.00E+00 | 0.20  | 5.36E-01 | 9.21E-01 |
| <b>G20736</b>     | 0.35  | 5.62E-01 | 1.00E+00 | 0.43  | 5.36E-01 | 9.21E-01 |
| <b>AC026367.3</b> | 1.93  | 3.83E-02 | 1.00E+00 | -0.58 | 5.36E-01 | 9.21E-01 |
| <b>CIART</b>      | -1.51 | 5.40E-03 | 4.32E-01 | -0.29 | 5.36E-01 | 9.21E-01 |
| <b>HSPD1</b>      | 0.19  | 4.37E-01 | 1.00E+00 | -0.14 | 5.36E-01 | 9.21E-01 |
| <b>FAM207A</b>    | -0.20 | 4.37E-01 | 1.00E+00 | 0.33  | 5.36E-01 | 9.21E-01 |
| <b>GPR158</b>     | -0.49 | 7.68E-01 | 1.00E+00 | 0.81  | 5.36E-01 | 9.21E-01 |
| <b>TYW3</b>       | 0.16  | 4.70E-01 | 1.00E+00 | -0.11 | 5.36E-01 | 9.21E-01 |
| <b>AC010735.2</b> | 2.52  | 5.89E-02 | 1.00E+00 | 0.60  | 5.36E-01 | 9.21E-01 |
| <b>HEXDC</b>      | -0.11 | 7.27E-01 | 1.00E+00 | 0.33  | 5.36E-01 | 9.21E-01 |
| <b>EFL1</b>       | -0.08 | 6.25E-01 | 1.00E+00 | 0.13  | 5.36E-01 | 9.21E-01 |
| <b>CCNG1</b>      | 0.20  | 4.34E-01 | 1.00E+00 | -0.21 | 5.36E-01 | 9.21E-01 |
| <b>VASP</b>       | -0.27 | 1.68E-01 | 1.00E+00 | 0.40  | 5.36E-01 | 9.21E-01 |
| <b>CCDC14</b>     | -0.35 | 1.94E-01 | 1.00E+00 | 0.11  | 5.36E-01 | 9.21E-01 |
| <b>EXOC3L2</b>    | -0.05 | 9.19E-01 | 1.00E+00 | 0.44  | 5.36E-01 | 9.21E-01 |
| <b>KLHL13</b>     | 0.10  | 8.55E-01 | 1.00E+00 | -0.33 | 5.36E-01 | 9.21E-01 |
| <b>AC116345.1</b> | 0.11  | 8.40E-01 | 1.00E+00 | 0.35  | 5.36E-01 | 9.21E-01 |
| <b>ROBO4</b>      | 0.16  | 7.63E-01 | 1.00E+00 | 0.39  | 5.36E-01 | 9.21E-01 |
| <b>AC027682.6</b> | 0.45  | 6.38E-01 | 1.00E+00 | -0.43 | 5.36E-01 | 9.21E-01 |
| <b>ARPIN</b>      | 0.14  | 5.99E-01 | 1.00E+00 | 0.21  | 5.37E-01 | 9.21E-01 |
| <b>TNFRSF10D</b>  | 0.03  | 9.60E-01 | 1.00E+00 | 0.50  | 5.37E-01 | 9.21E-01 |

|                   |       |          |          |       |          |          |
|-------------------|-------|----------|----------|-------|----------|----------|
| <b>GTF2IRD2</b>   | 0.46  | 1.44E-01 | 1.00E+00 | -0.32 | 5.37E-01 | 9.21E-01 |
| <b>L1TD1</b>      | -1.30 | 2.99E-01 | 1.00E+00 | 0.66  | 5.37E-01 | 9.21E-01 |
| <b>RAB3A</b>      | -1.17 | 4.81E-03 | 4.02E-01 | 0.32  | 5.37E-01 | 9.21E-01 |
| <b>SRR</b>        | -0.36 | 1.48E-01 | 1.00E+00 | -0.15 | 5.37E-01 | 9.21E-01 |
| <b>WDR97</b>      | -1.27 | 4.11E-01 | 1.00E+00 | 1.05  | 5.37E-01 | 9.21E-01 |
| <b>RPS10P5</b>    | -0.21 | 8.81E-01 | 1.00E+00 | 0.39  | 5.37E-01 | 9.21E-01 |
| <b>AC092017.1</b> | 0.56  | 8.71E-01 | 1.00E+00 | -0.50 | 5.37E-01 | 9.21E-01 |
| <b>CPNE8-AS1</b>  | -2.39 | 1.34E-01 | 1.00E+00 | -0.59 | 5.37E-01 | 9.21E-01 |
| <b>CIP2A</b>      | 0.21  | 6.30E-01 | 1.00E+00 | 0.23  | 5.37E-01 | 9.21E-01 |
| <b>NUF2</b>       | 0.23  | 6.32E-01 | 1.00E+00 | 0.33  | 5.37E-01 | 9.21E-01 |
| <b>TMEM44</b>     | 0.20  | 6.99E-01 | 1.00E+00 | 0.37  | 5.37E-01 | 9.21E-01 |
| <b>AC068152.1</b> | -0.12 | 7.86E-01 | 1.00E+00 | 0.24  | 5.37E-01 | 9.21E-01 |
| <b>DUSP8</b>      | -0.93 | 4.67E-02 | 1.00E+00 | 0.42  | 5.37E-01 | 9.21E-01 |
| <b>NRXN3</b>      | -0.77 | 3.00E-02 | 9.97E-01 | -0.37 | 5.37E-01 | 9.21E-01 |
| <b>KANSL1</b>     | -0.04 | 8.51E-01 | 1.00E+00 | 0.19  | 5.37E-01 | 9.21E-01 |
| <b>L3MBTL4</b>    | 0.36  | 3.32E-01 | 1.00E+00 | -0.21 | 5.37E-01 | 9.21E-01 |
| <b>S100A7A</b>    | -3.08 | 9.81E-03 | 6.13E-01 | 1.93  | 5.37E-01 | 9.21E-01 |
| <b>RASA1</b>      | 0.22  | 2.96E-01 | 1.00E+00 | 0.23  | 5.37E-01 | 9.21E-01 |
| <b>C14orf132</b>  | 0.16  | 5.56E-01 | 1.00E+00 | -0.21 | 5.37E-01 | 9.21E-01 |
| <b>CD101</b>      | -1.04 | 9.44E-02 | 1.00E+00 | 0.54  | 5.37E-01 | 9.21E-01 |
| <b>PCDHB9</b>     | -0.22 | 6.78E-01 | 1.00E+00 | -0.39 | 5.37E-01 | 9.21E-01 |
| <b>STIMATE</b>    | 0.38  | 8.71E-01 | 1.00E+00 | -0.35 | 5.38E-01 | 9.21E-01 |
| <b>AL157871.3</b> | 0.66  | 8.49E-01 | 1.00E+00 | 0.56  | 5.38E-01 | 9.21E-01 |
| <b>DCAF5</b>      | -0.01 | 9.62E-01 | 1.00E+00 | 0.13  | 5.38E-01 | 9.21E-01 |
| <b>CXCR3</b>      | -1.03 | 2.56E-01 | 1.00E+00 | 1.76  | 5.38E-01 | 9.21E-01 |
| <b>STT3B</b>      | 0.03  | 8.70E-01 | 1.00E+00 | -0.25 | 5.38E-01 | 9.21E-01 |
| <b>LRGUK</b>      | -1.99 | 1.80E-01 | 1.00E+00 | 0.61  | 5.38E-01 | 9.21E-01 |
| <b>TMEM35A</b>    | -0.11 | 8.85E-01 | 1.00E+00 | -0.41 | 5.38E-01 | 9.21E-01 |
| <b>HLX-AS1</b>    | 2.02  | 2.79E-01 | 1.00E+00 | 0.81  | 5.38E-01 | 9.21E-01 |
| <b>LINC01684</b>  | 0.41  | 6.55E-01 | 1.00E+00 | 0.69  | 5.38E-01 | 9.21E-01 |
| <b>AGT</b>        | -0.16 | 8.30E-01 | 1.00E+00 | 1.68  | 5.38E-01 | 9.21E-01 |
| <b>ERN1</b>       | 0.17  | 4.09E-01 | 1.00E+00 | 0.25  | 5.38E-01 | 9.21E-01 |

|             |       |          |          |       |          |          |
|-------------|-------|----------|----------|-------|----------|----------|
| RPS8        | -0.19 | 5.90E-01 | 1.00E+00 | 0.17  | 5.38E-01 | 9.21E-01 |
| CRELD1      | -0.17 | 6.45E-01 | 1.00E+00 | -0.17 | 5.38E-01 | 9.21E-01 |
| ZNF93       | -0.40 | 1.95E-01 | 1.00E+00 | -0.30 | 5.38E-01 | 9.21E-01 |
| CMBL        | 0.43  | 4.02E-01 | 1.00E+00 | -0.25 | 5.38E-01 | 9.21E-01 |
| GXYLT1      | 0.34  | 2.17E-01 | 1.00E+00 | 0.21  | 5.38E-01 | 9.21E-01 |
| ZIC1        | -0.36 | 7.32E-01 | 1.00E+00 | 1.93  | 5.38E-01 | 9.21E-01 |
| FHL5        | -0.61 | 3.24E-01 | 1.00E+00 | 0.32  | 5.38E-01 | 9.21E-01 |
| TBC1D10B    | -0.15 | 5.25E-01 | 1.00E+00 | 0.36  | 5.38E-01 | 9.21E-01 |
| LINC01888   | 30.00 | 6.58E-18 | 5.54E-15 | -1.03 | 5.38E-01 | 9.21E-01 |
| XLOC_008024 | 0.13  | 7.68E-01 | 1.00E+00 | 0.29  | 5.38E-01 | 9.21E-01 |
| XLOC_013866 | 0.47  | 6.20E-01 | 1.00E+00 | -0.62 | 5.38E-01 | 9.21E-01 |
| XLOC_000523 | -0.15 | 8.48E-01 | 1.00E+00 | 0.66  | 5.38E-01 | 9.21E-01 |
| G10272      | -0.01 | 9.96E-01 | 1.00E+00 | 0.41  | 5.39E-01 | 9.21E-01 |
| NAB2        | -0.28 | 3.94E-01 | 1.00E+00 | 0.35  | 5.39E-01 | 9.21E-01 |
| BNIP1       | 0.28  | 2.66E-01 | 1.00E+00 | 0.13  | 5.39E-01 | 9.21E-01 |
| XLOC_002032 | -1.63 | 1.58E-01 | 1.00E+00 | -0.76 | 5.39E-01 | 9.21E-01 |
| PHF2P2      | -0.88 | 4.36E-01 | 1.00E+00 | -0.64 | 5.39E-01 | 9.21E-01 |
| AHDC1       | -0.75 | 4.42E-02 | 1.00E+00 | 0.36  | 5.39E-01 | 9.21E-01 |
| TMEM158     | -0.09 | 8.71E-01 | 1.00E+00 | -0.40 | 5.39E-01 | 9.21E-01 |
| ZFP36L1     | -0.92 | 4.05E-02 | 1.00E+00 | 0.28  | 5.39E-01 | 9.21E-01 |
| LRP12       | 0.01  | 9.59E-01 | 1.00E+00 | 0.17  | 5.39E-01 | 9.21E-01 |
| PLEKHG3     | -0.47 | 6.96E-02 | 1.00E+00 | 0.43  | 5.39E-01 | 9.21E-01 |
| ENDOG       | -0.53 | 4.73E-02 | 1.00E+00 | -0.43 | 5.39E-01 | 9.22E-01 |
| AC084117.1  | -0.25 | 7.83E-01 | 1.00E+00 | 0.53  | 5.39E-01 | 9.22E-01 |
| RPL30       | -0.29 | 3.56E-01 | 1.00E+00 | 0.25  | 5.39E-01 | 9.22E-01 |
| TAF3        | -0.06 | 7.53E-01 | 1.00E+00 | 0.11  | 5.39E-01 | 9.22E-01 |
| ECEL1       | -1.67 | 4.83E-02 | 1.00E+00 | 1.93  | 5.39E-01 | 9.22E-01 |
| CALML3-AS1  | -0.10 | 8.03E-01 | 1.00E+00 | -0.45 | 5.39E-01 | 9.22E-01 |
| CDC42EP4    | -0.39 | 4.86E-02 | 1.00E+00 | -0.23 | 5.39E-01 | 9.22E-01 |
| EMC1        | 0.03  | 8.80E-01 | 1.00E+00 | 0.14  | 5.39E-01 | 9.22E-01 |
| DGKI        | 0.23  | 8.16E-01 | 1.00E+00 | 0.43  | 5.39E-01 | 9.22E-01 |
| NEURL3      | -0.20 | 8.63E-01 | 1.00E+00 | 0.64  | 5.39E-01 | 9.22E-01 |

|                   |       |          |          |       |          |          |
|-------------------|-------|----------|----------|-------|----------|----------|
| <b>TCTE3</b>      | -0.29 | 6.19E-01 | 1.00E+00 | -0.38 | 5.39E-01 | 9.22E-01 |
| <b>AL355355.2</b> | 0.59  | 3.12E-01 | 1.00E+00 | 0.44  | 5.39E-01 | 9.22E-01 |
| <b>FKBP1C</b>     | 0.27  | 7.25E-01 | 1.00E+00 | 0.33  | 5.40E-01 | 9.22E-01 |
| <b>FAM135A</b>    | 0.19  | 6.49E-01 | 1.00E+00 | -0.20 | 5.40E-01 | 9.22E-01 |
| <b>RAI14</b>      | -0.16 | 6.37E-01 | 1.00E+00 | 0.18  | 5.40E-01 | 9.22E-01 |
| <b>AADAT</b>      | -0.03 | 9.46E-01 | 1.00E+00 | -0.33 | 5.40E-01 | 9.22E-01 |
| <b>PAN3</b>       | 0.16  | 3.86E-01 | 1.00E+00 | 0.24  | 5.40E-01 | 9.22E-01 |
| <b>RASAL1</b>     | -0.31 | 3.19E-01 | 1.00E+00 | 0.41  | 5.40E-01 | 9.22E-01 |
| <b>THEM4</b>      | -0.29 | 3.22E-01 | 1.00E+00 | -0.16 | 5.40E-01 | 9.22E-01 |
| <b>ADAD2</b>      | -0.26 | 7.03E-01 | 1.00E+00 | 0.33  | 5.40E-01 | 9.22E-01 |
| <b>AC009549.1</b> | -1.06 | 2.96E-01 | 1.00E+00 | -0.70 | 5.40E-01 | 9.22E-01 |
| <b>TSR3</b>       | -0.01 | 9.63E-01 | 1.00E+00 | -0.41 | 5.40E-01 | 9.22E-01 |
| <b>IGHM</b>       | -0.40 | 8.23E-01 | 1.00E+00 | 1.92  | 5.40E-01 | 9.22E-01 |
| <b>AKIRIN1</b>    | 0.24  | 3.66E-01 | 1.00E+00 | 0.19  | 5.40E-01 | 9.22E-01 |
| <b>AC010319.1</b> | -4.79 | 3.27E-03 | 3.02E-01 | 1.00  | 5.40E-01 | 9.22E-01 |
| <b>DBT</b>        | 0.05  | 8.17E-01 | 1.00E+00 | -0.13 | 5.40E-01 | 9.22E-01 |
| <b>AL121929.2</b> | -0.79 | 4.13E-01 | 1.00E+00 | -0.88 | 5.40E-01 | 9.22E-01 |
| <b>PPDPF</b>      | -0.08 | 7.83E-01 | 1.00E+00 | 0.16  | 5.40E-01 | 9.22E-01 |
| <b>SQSTM1</b>     | 0.01  | 9.63E-01 | 1.00E+00 | 0.16  | 5.40E-01 | 9.22E-01 |
| <b>PPME1</b>      | 0.05  | 8.17E-01 | 1.00E+00 | -0.13 | 5.40E-01 | 9.22E-01 |
| <b>OGFRP1</b>     | -1.15 | 4.36E-02 | 1.00E+00 | 0.67  | 5.40E-01 | 9.22E-01 |
| <b>FAXDC2</b>     | 0.55  | 6.95E-02 | 1.00E+00 | -0.23 | 5.40E-01 | 9.22E-01 |
| <b>PSMD10</b>     | 0.23  | 1.99E-01 | 1.00E+00 | -0.16 | 5.40E-01 | 9.22E-01 |
| <b>ZNF266</b>     | -0.12 | 6.45E-01 | 1.00E+00 | 0.22  | 5.41E-01 | 9.22E-01 |
| <b>ZNF192P1</b>   | -0.84 | 6.12E-01 | 1.00E+00 | 0.66  | 5.41E-01 | 9.23E-01 |
| <b>INSL6</b>      | 2.13  | 3.24E-01 | 1.00E+00 | -0.53 | 5.41E-01 | 9.23E-01 |
| <b>WNT7B</b>      | -0.06 | 8.85E-01 | 1.00E+00 | -0.46 | 5.41E-01 | 9.23E-01 |
| <b>SMG9</b>       | 0.13  | 7.53E-01 | 1.00E+00 | 0.31  | 5.41E-01 | 9.23E-01 |
| <b>ARSH</b>       | -2.36 | 7.07E-02 | 1.00E+00 | 0.76  | 5.41E-01 | 9.23E-01 |
| <b>TLN1</b>       | -0.04 | 9.03E-01 | 1.00E+00 | 0.36  | 5.41E-01 | 9.23E-01 |
| <b>LINC02246</b>  | 0.03  | 9.87E-01 | 1.00E+00 | -0.69 | 5.41E-01 | 9.23E-01 |
| <b>KLHL28</b>     | 0.15  | 6.22E-01 | 1.00E+00 | -0.24 | 5.41E-01 | 9.23E-01 |

|                   |       |          |          |       |          |          |
|-------------------|-------|----------|----------|-------|----------|----------|
| <b>GABBR1</b>     | -0.36 | 5.17E-01 | 1.00E+00 | 0.34  | 5.41E-01 | 9.23E-01 |
| <b>COG4</b>       | -0.20 | 4.56E-01 | 1.00E+00 | -0.09 | 5.41E-01 | 9.23E-01 |
| <b>MRPL24</b>     | -0.05 | 7.72E-01 | 1.00E+00 | -0.17 | 5.41E-01 | 9.23E-01 |
| <b>LINC01485</b>  | 3.89  | 1.07E-02 | 6.40E-01 | -0.68 | 5.41E-01 | 9.23E-01 |
| <b>POLR3F</b>     | -0.01 | 9.81E-01 | 1.00E+00 | -0.14 | 5.41E-01 | 9.23E-01 |
| <b>HIST1H3G</b>   | 0.11  | 9.54E-01 | 1.00E+00 | 0.75  | 5.41E-01 | 9.23E-01 |
| <b>CCDC89</b>     | 0.10  | 7.67E-01 | 1.00E+00 | 0.42  | 5.41E-01 | 9.23E-01 |
| <b>PMS2P5</b>     | -0.27 | 4.98E-01 | 1.00E+00 | -0.19 | 5.41E-01 | 9.23E-01 |
| <b>DDN</b>        | -5.61 | 3.35E-12 | 2.25E-09 | 1.09  | 5.41E-01 | 9.23E-01 |
| <b>AC104031.1</b> | -1.88 | 2.31E-01 | 1.00E+00 | -0.42 | 5.42E-01 | 9.23E-01 |
| <b>UBE2V1P2</b>   | 1.20  | 5.88E-01 | 1.00E+00 | 0.51  | 5.42E-01 | 9.23E-01 |
| <b>AL022311.1</b> | -0.23 | 7.91E-01 | 1.00E+00 | 0.37  | 5.42E-01 | 9.23E-01 |
| <b>APTX</b>       | 0.06  | 7.51E-01 | 1.00E+00 | -0.13 | 5.42E-01 | 9.23E-01 |
| <b>ANKFY1</b>     | 0.25  | 2.10E-01 | 1.00E+00 | 0.21  | 5.42E-01 | 9.23E-01 |
| <b>RNF2</b>       | -0.07 | 7.26E-01 | 1.00E+00 | -0.11 | 5.42E-01 | 9.23E-01 |
| <b>AC008443.5</b> | -0.18 | 9.22E-01 | 1.00E+00 | 0.66  | 5.42E-01 | 9.23E-01 |
| <b>NOVA1</b>      | 1.23  | 3.33E-02 | 1.00E+00 | -0.37 | 5.42E-01 | 9.23E-01 |
| <b>INO80D</b>     | 0.16  | 5.92E-01 | 1.00E+00 | 0.20  | 5.42E-01 | 9.23E-01 |
| <b>PLIN4</b>      | 4.88  | 2.86E-03 | 2.79E-01 | -1.91 | 5.42E-01 | 9.23E-01 |
| <b>ARHGEF1</b>    | -0.34 | 1.29E-01 | 1.00E+00 | 0.32  | 5.42E-01 | 9.23E-01 |
| <b>MYSM1</b>      | 0.02  | 9.49E-01 | 1.00E+00 | -0.18 | 5.42E-01 | 9.23E-01 |
| <b>DDX50</b>      | 0.21  | 2.53E-01 | 1.00E+00 | -0.12 | 5.42E-01 | 9.23E-01 |
| <b>AC009362.1</b> | NA    | NA       | NA       | 0.55  | 5.42E-01 | 9.23E-01 |
| <b>RFTN1</b>      | 0.33  | 3.86E-01 | 1.00E+00 | 0.31  | 5.42E-01 | 9.23E-01 |
| <b>NME2</b>       | -0.86 | 4.10E-01 | 1.00E+00 | 0.47  | 5.42E-01 | 9.23E-01 |
| <b>GAS5</b>       | -0.02 | 9.49E-01 | 1.00E+00 | 0.22  | 5.42E-01 | 9.23E-01 |
| <b>CCNJL</b>      | -0.33 | 5.65E-01 | 1.00E+00 | 0.54  | 5.42E-01 | 9.23E-01 |
| <b>CIB2</b>       | -0.45 | 1.66E-01 | 1.00E+00 | 0.42  | 5.42E-01 | 9.23E-01 |
| <b>DTNB</b>       | 0.05  | 9.09E-01 | 1.00E+00 | -0.25 | 5.42E-01 | 9.23E-01 |
| <b>ATG16L2</b>    | -0.40 | 3.34E-01 | 1.00E+00 | 0.27  | 5.42E-01 | 9.23E-01 |
| <b>IST1</b>       | 0.27  | 9.84E-02 | 1.00E+00 | 0.09  | 5.42E-01 | 9.23E-01 |
| <b>AC008771.1</b> | 0.18  | 7.33E-01 | 1.00E+00 | -0.28 | 5.43E-01 | 9.23E-01 |

|                    |       |          |          |       |          |          |
|--------------------|-------|----------|----------|-------|----------|----------|
| <b>XLOC_008955</b> | 1.06  | 4.61E-02 | 1.00E+00 | 0.46  | 5.43E-01 | 9.23E-01 |
| <b>CKMT1B</b>      | -0.68 | 2.87E-04 | 6.33E-02 | -0.28 | 5.43E-01 | 9.23E-01 |
| <b>ZNF829</b>      | 0.10  | 7.40E-01 | 1.00E+00 | -0.18 | 5.43E-01 | 9.23E-01 |
| <b>KIF13A</b>      | -0.05 | 7.83E-01 | 1.00E+00 | 0.28  | 5.43E-01 | 9.23E-01 |
| <b>B3GALT1</b>     | -0.09 | 9.28E-01 | 1.00E+00 | -0.57 | 5.43E-01 | 9.23E-01 |
| <b>MRPS18B</b>     | 0.05  | 7.62E-01 | 1.00E+00 | -0.14 | 5.43E-01 | 9.23E-01 |
| <b>FBXO48</b>      | 0.02  | 9.73E-01 | 1.00E+00 | -0.26 | 5.43E-01 | 9.23E-01 |
| <b>AC024270.4</b>  | -2.82 | 1.80E-03 | 2.38E-01 | -0.68 | 5.43E-01 | 9.23E-01 |
| <b>AC006059.1</b>  | -0.83 | 2.31E-01 | 1.00E+00 | 0.42  | 5.43E-01 | 9.23E-01 |
| <b>RPS18</b>       | -0.03 | 9.30E-01 | 1.00E+00 | 0.18  | 5.43E-01 | 9.23E-01 |
| <b>PRMT1</b>       | -0.32 | 8.59E-02 | 1.00E+00 | 0.12  | 5.43E-01 | 9.23E-01 |
| <b>NEDD4L</b>      | 0.11  | 8.21E-01 | 1.00E+00 | -0.22 | 5.43E-01 | 9.23E-01 |
| <b>COX7A2L</b>     | 0.23  | 2.84E-01 | 1.00E+00 | -0.20 | 5.43E-01 | 9.23E-01 |
| <b>ZMAT2</b>       | 0.11  | 5.85E-01 | 1.00E+00 | 0.13  | 5.43E-01 | 9.23E-01 |
| <b>SLC27A2</b>     | -0.47 | 3.29E-01 | 1.00E+00 | -0.45 | 5.43E-01 | 9.23E-01 |
| <b>PDCD2L</b>      | 0.42  | 4.16E-01 | 1.00E+00 | 0.22  | 5.43E-01 | 9.23E-01 |
| <b>AC010768.2</b>  | 2.49  | 3.69E-01 | 1.00E+00 | 0.66  | 5.43E-01 | 9.23E-01 |
| <b>ZNF815P</b>     | -0.08 | 8.46E-01 | 1.00E+00 | 0.24  | 5.43E-01 | 9.23E-01 |
| <b>IFT46</b>       | 0.15  | 5.82E-01 | 1.00E+00 | 0.12  | 5.44E-01 | 9.23E-01 |
| <b>G30615</b>      | -1.79 | 1.77E-01 | 1.00E+00 | -0.89 | 5.44E-01 | 9.23E-01 |
| <b>C5orf49</b>     | 0.47  | 3.49E-01 | 1.00E+00 | -0.45 | 5.44E-01 | 9.23E-01 |
| <b>MTND1P23</b>    | 0.75  | 4.65E-01 | 1.00E+00 | 0.61  | 5.44E-01 | 9.23E-01 |
| <b>CREB1</b>       | 0.08  | 7.09E-01 | 1.00E+00 | -0.10 | 5.44E-01 | 9.23E-01 |
| <b>MAN1B1-DT</b>   | 0.16  | 6.20E-01 | 1.00E+00 | -0.39 | 5.44E-01 | 9.23E-01 |
| <b>TTC39C-AS1</b>  | 1.52  | 3.38E-01 | 1.00E+00 | 0.53  | 5.44E-01 | 9.23E-01 |
| <b>TACSTD2</b>     | 0.09  | 8.37E-01 | 1.00E+00 | 0.32  | 5.44E-01 | 9.23E-01 |
| <b>AL031123.2</b>  | -1.01 | 2.30E-01 | 1.00E+00 | -0.70 | 5.44E-01 | 9.23E-01 |
| <b>RNASEH1-AS1</b> | -0.47 | 1.97E-01 | 1.00E+00 | -0.21 | 5.44E-01 | 9.23E-01 |
| <b>STK38</b>       | 0.18  | 5.28E-01 | 1.00E+00 | -0.13 | 5.44E-01 | 9.23E-01 |
| <b>SCGB3A2</b>     | 0.76  | 3.19E-01 | 1.00E+00 | -0.51 | 5.44E-01 | 9.23E-01 |
| <b>GLUD2</b>       | 0.19  | 7.88E-01 | 1.00E+00 | -0.33 | 5.44E-01 | 9.23E-01 |
| <b>CROCC</b>       | -0.31 | 3.39E-01 | 1.00E+00 | 0.41  | 5.44E-01 | 9.23E-01 |



|             |       |          |          |       |          |          |
|-------------|-------|----------|----------|-------|----------|----------|
| KCNK13      | -1.91 | 1.56E-02 | 7.80E-01 | 0.89  | 5.44E-01 | 9.23E-01 |
| AP000442.2  | -0.76 | 1.18E-01 | 1.00E+00 | -0.39 | 5.44E-01 | 9.23E-01 |
| MTMR12      | 0.22  | 2.93E-01 | 1.00E+00 | -0.21 | 5.44E-01 | 9.23E-01 |
| XLOC_004632 | -0.98 | 4.65E-01 | 1.00E+00 | 0.42  | 5.44E-01 | 9.23E-01 |
| NCBP2       | 0.07  | 7.20E-01 | 1.00E+00 | -0.12 | 5.44E-01 | 9.23E-01 |
| ADIPOR1     | 0.03  | 8.99E-01 | 1.00E+00 | -0.16 | 5.44E-01 | 9.23E-01 |
| TASP1       | 0.03  | 9.17E-01 | 1.00E+00 | -0.19 | 5.44E-01 | 9.23E-01 |
| CSNK1G3     | 0.20  | 3.93E-01 | 1.00E+00 | -0.16 | 5.44E-01 | 9.23E-01 |
| SERTM1      | -0.04 | 9.85E-01 | 1.00E+00 | 0.79  | 5.44E-01 | 9.23E-01 |
| NEIL3       | -0.10 | 8.70E-01 | 1.00E+00 | -0.41 | 5.44E-01 | 9.23E-01 |
| AL445472.1  | -0.05 | 9.27E-01 | 1.00E+00 | 0.22  | 5.44E-01 | 9.23E-01 |
| AL137127.1  | -0.01 | 9.92E-01 | 1.00E+00 | 0.41  | 5.44E-01 | 9.23E-01 |
| MAJIN       | -0.88 | 4.30E-01 | 1.00E+00 | -0.62 | 5.44E-01 | 9.23E-01 |
| NDUFA10     | -0.08 | 6.77E-01 | 1.00E+00 | -0.12 | 5.44E-01 | 9.23E-01 |
| MAML2       | 0.02  | 9.44E-01 | 1.00E+00 | 0.18  | 5.44E-01 | 9.23E-01 |
| PPP4R4      | -0.17 | 7.37E-01 | 1.00E+00 | 0.53  | 5.44E-01 | 9.23E-01 |
| FJX1        | -0.59 | 1.04E-01 | 1.00E+00 | 0.25  | 5.45E-01 | 9.23E-01 |
| KIR2DS4     | 0.67  | 8.06E-01 | 1.00E+00 | 0.93  | 5.45E-01 | 9.23E-01 |
| AC244230.1  | -1.50 | 4.48E-01 | 1.00E+00 | -0.45 | 5.45E-01 | 9.23E-01 |
| DIO3        | 0.73  | 2.66E-01 | 1.00E+00 | 1.42  | 5.45E-01 | 9.23E-01 |
| UNC93A      | 0.19  | 7.45E-01 | 1.00E+00 | 0.45  | 5.45E-01 | 9.23E-01 |
| PTPMT1      | 0.10  | 8.87E-01 | 1.00E+00 | -0.33 | 5.45E-01 | 9.23E-01 |
| MFAP4       | 0.76  | 1.47E-01 | 1.00E+00 | 0.34  | 5.45E-01 | 9.23E-01 |
| DSCC1       | 0.10  | 7.97E-01 | 1.00E+00 | -0.30 | 5.45E-01 | 9.23E-01 |
| AC105277.1  | -0.36 | 6.02E-01 | 1.00E+00 | 0.47  | 5.45E-01 | 9.23E-01 |
| SFT2D2      | 0.54  | 2.31E-02 | 9.12E-01 | -0.19 | 5.45E-01 | 9.23E-01 |
| TMEM91      | -0.01 | 9.77E-01 | 1.00E+00 | -0.35 | 5.45E-01 | 9.23E-01 |
| AC023157.1  | 3.53  | 2.96E-01 | 1.00E+00 | 1.91  | 5.45E-01 | 9.23E-01 |
| H2AFY       | -0.22 | 4.64E-01 | 1.00E+00 | -0.17 | 5.45E-01 | 9.23E-01 |
| AL512791.2  | 0.88  | 5.68E-01 | 1.00E+00 | -0.62 | 5.45E-01 | 9.23E-01 |
| PEX1        | -0.02 | 9.21E-01 | 1.00E+00 | -0.12 | 5.45E-01 | 9.23E-01 |
| HDAC5       | 0.19  | 4.26E-01 | 1.00E+00 | -0.23 | 5.45E-01 | 9.23E-01 |

|                    |       |          |          |       |          |          |
|--------------------|-------|----------|----------|-------|----------|----------|
| <b>SUB1P3</b>      | 0.66  | 8.49E-01 | 1.00E+00 | -0.41 | 5.45E-01 | 9.23E-01 |
| <b>DCP1B</b>       | -0.07 | 6.95E-01 | 1.00E+00 | 0.11  | 5.45E-01 | 9.23E-01 |
| <b>RN7SKP80</b>    | 0.87  | 5.62E-01 | 1.00E+00 | -0.69 | 5.45E-01 | 9.23E-01 |
| <b>RNU7-45P</b>    | -0.10 | 9.75E-01 | 1.00E+00 | 0.60  | 5.45E-01 | 9.23E-01 |
| <b>G31689</b>      | -1.87 | 4.62E-01 | 1.00E+00 | 0.57  | 5.45E-01 | 9.23E-01 |
| <b>RDH10</b>       | 0.12  | 6.88E-01 | 1.00E+00 | -0.21 | 5.45E-01 | 9.23E-01 |
| <b>AL360267.2</b>  | -0.99 | 3.29E-01 | 1.00E+00 | 0.56  | 5.45E-01 | 9.23E-01 |
| <b>PCDHB13</b>     | -0.49 | 1.01E-01 | 1.00E+00 | -0.31 | 5.46E-01 | 9.23E-01 |
| <b>ICE2</b>        | 0.03  | 8.85E-01 | 1.00E+00 | -0.11 | 5.46E-01 | 9.23E-01 |
| <b>GNS</b>         | 0.37  | 3.30E-01 | 1.00E+00 | 0.24  | 5.46E-01 | 9.23E-01 |
| <b>KIAA1614</b>    | 0.21  | 5.62E-01 | 1.00E+00 | 0.47  | 5.46E-01 | 9.23E-01 |
| <b>UXS1</b>        | 0.01  | 9.69E-01 | 1.00E+00 | -0.08 | 5.46E-01 | 9.23E-01 |
| <b>PRRT1</b>       | -1.07 | 3.48E-02 | 1.00E+00 | 0.46  | 5.46E-01 | 9.23E-01 |
| <b>ABCA7</b>       | -0.21 | 5.77E-01 | 1.00E+00 | 0.35  | 5.46E-01 | 9.23E-01 |
| <b>TXN</b>         | -0.04 | 8.69E-01 | 1.00E+00 | -0.24 | 5.46E-01 | 9.23E-01 |
| <b>WRAP53</b>      | -0.12 | 6.32E-01 | 1.00E+00 | 0.09  | 5.46E-01 | 9.23E-01 |
| <b>XLOC_007263</b> | -0.80 | 7.97E-01 | 1.00E+00 | -0.87 | 5.46E-01 | 9.23E-01 |
| <b>PLAC4</b>       | -0.11 | 9.21E-01 | 1.00E+00 | -0.63 | 5.46E-01 | 9.23E-01 |
| <b>KATNAL1</b>     | 0.22  | 5.52E-01 | 1.00E+00 | -0.23 | 5.46E-01 | 9.23E-01 |
| <b>SRARP</b>       | 1.05  | 5.58E-01 | 1.00E+00 | 0.92  | 5.46E-01 | 9.24E-01 |
| <b>KDM7A-DT</b>    | -0.16 | 4.42E-01 | 1.00E+00 | 0.26  | 5.46E-01 | 9.24E-01 |
| <b>GPR89P</b>      | -1.00 | 6.89E-01 | 1.00E+00 | -1.43 | 5.46E-01 | 9.24E-01 |
| <b>AC093525.6</b>  | -0.27 | 8.49E-01 | 1.00E+00 | -0.71 | 5.46E-01 | 9.24E-01 |
| <b>PPBP</b>        | -0.20 | 9.29E-01 | 1.00E+00 | -1.92 | 5.46E-01 | 9.24E-01 |
| <b>MED11</b>       | -0.08 | 7.99E-01 | 1.00E+00 | -0.20 | 5.46E-01 | 9.24E-01 |
| <b>AC131009.4</b>  | 1.77  | 2.62E-01 | 1.00E+00 | -0.56 | 5.46E-01 | 9.24E-01 |
| <b>ZBED3-AS1</b>   | 1.66  | 7.94E-02 | 1.00E+00 | -0.50 | 5.46E-01 | 9.24E-01 |
| <b>ZKSCAN1</b>     | 0.07  | 7.82E-01 | 1.00E+00 | -0.16 | 5.46E-01 | 9.24E-01 |
| <b>SLC25A38</b>    | 0.37  | 2.47E-02 | 9.28E-01 | -0.09 | 5.46E-01 | 9.24E-01 |
| <b>STAT3</b>       | -0.18 | 3.65E-01 | 1.00E+00 | 0.20  | 5.46E-01 | 9.24E-01 |
| <b>MYLK4</b>       | 0.60  | 2.55E-01 | 1.00E+00 | 0.54  | 5.46E-01 | 9.24E-01 |
| <b>TMEM117</b>     | -0.19 | 5.18E-01 | 1.00E+00 | -0.25 | 5.46E-01 | 9.24E-01 |

|                    |       |          |          |       |          |          |
|--------------------|-------|----------|----------|-------|----------|----------|
| <b>MPP7</b>        | 0.19  | 6.78E-01 | 1.00E+00 | -0.24 | 5.47E-01 | 9.24E-01 |
| <b>PPM1N</b>       | 0.09  | 8.05E-01 | 1.00E+00 | -0.20 | 5.47E-01 | 9.24E-01 |
| <b>SHLD3</b>       | -0.34 | 4.61E-01 | 1.00E+00 | 0.28  | 5.47E-01 | 9.24E-01 |
| <b>CDCA4</b>       | -0.24 | 5.33E-01 | 1.00E+00 | 0.20  | 5.47E-01 | 9.24E-01 |
| <b>ILF2</b>        | -0.19 | 3.31E-01 | 1.00E+00 | -0.14 | 5.47E-01 | 9.24E-01 |
| <b>MAP3K14</b>     | -0.90 | 4.27E-02 | 1.00E+00 | 0.45  | 5.47E-01 | 9.24E-01 |
| <b>MAP3K6</b>      | -0.03 | 9.28E-01 | 1.00E+00 | -0.29 | 5.47E-01 | 9.24E-01 |
| <b>AC105384.1</b>  | 1.25  | 2.92E-01 | 1.00E+00 | 0.75  | 5.47E-01 | 9.24E-01 |
| <b>BMP5</b>        | 0.34  | 7.76E-01 | 1.00E+00 | -1.79 | 5.47E-01 | 9.24E-01 |
| <b>AC025280.2</b>  | 0.37  | 7.85E-01 | 1.00E+00 | -0.67 | 5.47E-01 | 9.24E-01 |
| <b>ENO1-AS1</b>    | 3.05  | 3.65E-01 | 1.00E+00 | -0.49 | 5.47E-01 | 9.24E-01 |
| <b>AC132938.3</b>  | -0.22 | 5.82E-01 | 1.00E+00 | -0.32 | 5.47E-01 | 9.24E-01 |
| <b>CBR1</b>        | 0.04  | 8.84E-01 | 1.00E+00 | -0.24 | 5.47E-01 | 9.24E-01 |
| <b>XLOC_002194</b> | 0.26  | 8.27E-01 | 1.00E+00 | 0.75  | 5.47E-01 | 9.24E-01 |
| <b>G24237</b>      | 0.46  | 6.84E-01 | 1.00E+00 | -0.38 | 5.47E-01 | 9.24E-01 |
| <b>AL356270.1</b>  | -2.17 | 1.57E-01 | 1.00E+00 | -0.49 | 5.47E-01 | 9.24E-01 |
| <b>DGKZP1</b>      | 0.41  | 5.05E-01 | 1.00E+00 | -0.25 | 5.48E-01 | 9.24E-01 |
| <b>TRIM28</b>      | -0.13 | 5.62E-01 | 1.00E+00 | 0.28  | 5.48E-01 | 9.24E-01 |
| <b>AC105114.2</b>  | -1.24 | 7.19E-01 | 1.00E+00 | 0.87  | 5.48E-01 | 9.24E-01 |
| <b>SLC6A12</b>     | -0.47 | 4.55E-01 | 1.00E+00 | 0.70  | 5.48E-01 | 9.24E-01 |
| <b>PLEKHA3P1</b>   | -1.85 | 5.10E-01 | 1.00E+00 | 0.75  | 5.48E-01 | 9.24E-01 |
| <b>AC004923.1</b>  | -0.80 | 3.35E-01 | 1.00E+00 | -0.50 | 5.48E-01 | 9.24E-01 |
| <b>NUFIP2</b>      | -0.14 | 5.00E-01 | 1.00E+00 | 0.23  | 5.48E-01 | 9.24E-01 |
| <b>IGKV1D-8</b>    | NA    | NA       | NA       | 1.92  | 5.48E-01 | 9.24E-01 |
| <b>G38700</b>      | -1.39 | 2.10E-01 | 1.00E+00 | 0.39  | 5.48E-01 | 9.24E-01 |
| <b>MOBP</b>        | -5.87 | 2.83E-06 | 9.97E-04 | 1.34  | 5.48E-01 | 9.24E-01 |
| <b>TTC39C</b>      | 0.12  | 6.92E-01 | 1.00E+00 | -0.20 | 5.48E-01 | 9.24E-01 |
| <b>SLC31A1</b>     | 0.02  | 9.51E-01 | 1.00E+00 | 0.16  | 5.48E-01 | 9.24E-01 |
| <b>BCL6</b>        | -0.22 | 4.56E-01 | 1.00E+00 | 0.18  | 5.48E-01 | 9.24E-01 |
| <b>DHX29</b>       | -0.10 | 6.34E-01 | 1.00E+00 | -0.11 | 5.48E-01 | 9.24E-01 |
| <b>SETD2</b>       | -0.13 | 5.63E-01 | 1.00E+00 | 0.18  | 5.48E-01 | 9.24E-01 |
| <b>AC004156.1</b>  | -0.61 | 5.53E-01 | 1.00E+00 | -0.51 | 5.48E-01 | 9.24E-01 |

|                   |       |          |          |       |          |          |
|-------------------|-------|----------|----------|-------|----------|----------|
| <b>SASS6</b>      | -0.05 | 8.81E-01 | 1.00E+00 | -0.20 | 5.48E-01 | 9.24E-01 |
| <b>MYB</b>        | 0.43  | 3.93E-01 | 1.00E+00 | -0.48 | 5.48E-01 | 9.24E-01 |
| <b>LNCOC1</b>     | 1.02  | 3.11E-01 | 1.00E+00 | -0.74 | 5.48E-01 | 9.24E-01 |
| <b>AC090114.3</b> | -1.59 | 1.66E-01 | 1.00E+00 | 0.55  | 5.48E-01 | 9.24E-01 |
| <b>NPHP3</b>      | 0.65  | 2.02E-01 | 1.00E+00 | 0.27  | 5.48E-01 | 9.24E-01 |
| <b>PPP1R1C</b>    | -0.88 | 1.81E-01 | 1.00E+00 | -0.33 | 5.48E-01 | 9.24E-01 |
| <b>ZNF404</b>     | -0.21 | 7.09E-01 | 1.00E+00 | -0.59 | 5.48E-01 | 9.24E-01 |
| <b>GAK</b>        | -0.25 | 2.21E-01 | 1.00E+00 | 0.31  | 5.48E-01 | 9.24E-01 |
| <b>PLA2G4F</b>    | -0.27 | 5.26E-01 | 1.00E+00 | -0.44 | 5.48E-01 | 9.24E-01 |
| <b>FOXC2</b>      | -0.15 | 7.88E-01 | 1.00E+00 | 0.55  | 5.49E-01 | 9.24E-01 |
| <b>NUP133</b>     | 0.09  | 6.54E-01 | 1.00E+00 | -0.08 | 5.49E-01 | 9.24E-01 |
| <b>NOM1</b>       | -0.05 | 7.86E-01 | 1.00E+00 | 0.31  | 5.49E-01 | 9.24E-01 |
| <b>TENT2</b>      | 0.33  | 1.32E-01 | 1.00E+00 | 0.13  | 5.49E-01 | 9.24E-01 |
| <b>LINC01126</b>  | -1.10 | 3.54E-01 | 1.00E+00 | 0.75  | 5.49E-01 | 9.24E-01 |
| <b>NME8</b>       | 0.91  | 6.00E-01 | 1.00E+00 | 0.57  | 5.49E-01 | 9.24E-01 |
| <b>ADD3</b>       | 0.44  | 1.23E-01 | 1.00E+00 | -0.15 | 5.49E-01 | 9.24E-01 |
| <b>RAP2C-AS1</b>  | -0.19 | 5.51E-01 | 1.00E+00 | -0.24 | 5.49E-01 | 9.24E-01 |
| <b>Z95152.1</b>   | -0.39 | 8.71E-01 | 1.00E+00 | -0.61 | 5.49E-01 | 9.24E-01 |
| <b>LINC01303</b>  | -1.42 | 4.36E-01 | 1.00E+00 | -0.64 | 5.49E-01 | 9.24E-01 |
| <b>ZNF318</b>     | -0.38 | 8.30E-02 | 1.00E+00 | 0.28  | 5.49E-01 | 9.24E-01 |
| <b>AL359962.1</b> | 0.10  | 9.06E-01 | 1.00E+00 | -0.47 | 5.49E-01 | 9.24E-01 |
| <b>FOS</b>        | -0.77 | 4.95E-01 | 1.00E+00 | -0.33 | 5.49E-01 | 9.24E-01 |
| <b>RNF166</b>     | 0.23  | 3.22E-01 | 1.00E+00 | 0.36  | 5.49E-01 | 9.24E-01 |
| <b>METTL17</b>    | -0.10 | 6.72E-01 | 1.00E+00 | -0.13 | 5.49E-01 | 9.24E-01 |
| <b>ABHD11-AS1</b> | -0.53 | 5.95E-01 | 1.00E+00 | -0.37 | 5.49E-01 | 9.24E-01 |
| <b>CSF3</b>       | -2.23 | 5.02E-01 | 1.00E+00 | 1.88  | 5.49E-01 | 9.24E-01 |
| <b>INTS13</b>     | 0.19  | 5.80E-01 | 1.00E+00 | 0.19  | 5.49E-01 | 9.24E-01 |
| <b>MOCOS</b>      | -0.15 | 6.52E-01 | 1.00E+00 | 0.23  | 5.49E-01 | 9.24E-01 |
| <b>SEPT7-AS1</b>  | -0.34 | 5.49E-01 | 1.00E+00 | -0.31 | 5.49E-01 | 9.24E-01 |
| <b>ARHGEF11</b>   | -0.24 | 3.29E-01 | 1.00E+00 | 0.50  | 5.49E-01 | 9.24E-01 |
| <b>PNPLA7</b>     | -0.10 | 7.96E-01 | 1.00E+00 | -0.26 | 5.49E-01 | 9.24E-01 |
| <b>ZKSCAN3</b>    | 0.00  | 9.98E-01 | 1.00E+00 | 0.22  | 5.49E-01 | 9.24E-01 |

|                   |       |          |          |       |          |          |
|-------------------|-------|----------|----------|-------|----------|----------|
| <b>LRP2BP</b>     | -0.09 | 8.92E-01 | 1.00E+00 | -0.28 | 5.49E-01 | 9.24E-01 |
| <b>AL133268.1</b> | -1.11 | 4.72E-01 | 1.00E+00 | -0.51 | 5.49E-01 | 9.24E-01 |
| <b>AL596325.2</b> | 0.50  | 7.12E-01 | 1.00E+00 | 0.62  | 5.49E-01 | 9.24E-01 |
| <b>AC006001.2</b> | -0.35 | 5.74E-01 | 1.00E+00 | 0.20  | 5.49E-01 | 9.24E-01 |
| <b>EMC7</b>       | 0.05  | 7.54E-01 | 1.00E+00 | -0.16 | 5.49E-01 | 9.24E-01 |
| <b>NOL8</b>       | -0.13 | 5.69E-01 | 1.00E+00 | -0.11 | 5.50E-01 | 9.25E-01 |
| <b>ZNF831</b>     | -1.00 | 2.54E-01 | 1.00E+00 | 1.88  | 5.50E-01 | 9.25E-01 |
| <b>ASB5</b>       | 3.24  | 1.76E-01 | 1.00E+00 | -0.85 | 5.50E-01 | 9.25E-01 |
| <b>GPR137</b>     | -0.26 | 1.67E-01 | 1.00E+00 | 0.25  | 5.50E-01 | 9.25E-01 |
| <b>PRPF6</b>      | -0.12 | 5.81E-01 | 1.00E+00 | 0.12  | 5.50E-01 | 9.25E-01 |
| <b>KRT32</b>      | -4.14 | 8.42E-03 | 5.67E-01 | -1.88 | 5.50E-01 | 9.25E-01 |
| <b>AL353593.1</b> | -0.49 | 4.75E-01 | 1.00E+00 | -0.60 | 5.50E-01 | 9.25E-01 |
| <b>NSFP1</b>      | -1.29 | 7.04E-01 | 1.00E+00 | 0.66  | 5.50E-01 | 9.25E-01 |
| <b>SLC12A3</b>    | -2.63 | 3.01E-01 | 1.00E+00 | 0.87  | 5.50E-01 | 9.25E-01 |
| <b>NAA15</b>      | -0.28 | 3.09E-01 | 1.00E+00 | 0.14  | 5.50E-01 | 9.25E-01 |
| <b>AC011912.1</b> | 0.57  | 3.58E-01 | 1.00E+00 | 0.57  | 5.50E-01 | 9.25E-01 |
| <b>EXPH5</b>      | -0.01 | 9.69E-01 | 1.00E+00 | -0.40 | 5.50E-01 | 9.25E-01 |
| <b>AL162424.1</b> | -0.81 | 1.78E-01 | 1.00E+00 | -0.31 | 5.50E-01 | 9.25E-01 |
| <b>CPEB3</b>      | -0.24 | 4.66E-01 | 1.00E+00 | -0.28 | 5.50E-01 | 9.25E-01 |
| <b>PITPNA</b>     | 0.09  | 7.31E-01 | 1.00E+00 | -0.28 | 5.50E-01 | 9.25E-01 |
| <b>PTPN14</b>     | 0.37  | 2.96E-01 | 1.00E+00 | -0.17 | 5.50E-01 | 9.25E-01 |
| <b>AC011586.2</b> | -0.08 | 9.81E-01 | 1.00E+00 | 0.75  | 5.50E-01 | 9.25E-01 |
| <b>HECTD4</b>     | -0.14 | 4.40E-01 | 1.00E+00 | 0.31  | 5.50E-01 | 9.25E-01 |
| <b>AC008764.9</b> | -4.03 | 5.42E-02 | 1.00E+00 | -0.86 | 5.50E-01 | 9.25E-01 |
| <b>TMEM242</b>    | 0.30  | 7.91E-02 | 1.00E+00 | -0.20 | 5.50E-01 | 9.25E-01 |
| <b>GDI2P2</b>     | -2.01 | 5.57E-01 | 1.00E+00 | 0.35  | 5.50E-01 | 9.25E-01 |
| <b>LRRC32</b>     | -0.03 | 9.46E-01 | 1.00E+00 | 0.40  | 5.50E-01 | 9.25E-01 |
| <b>ADARB2</b>     | 0.23  | 7.52E-01 | 1.00E+00 | -0.62 | 5.50E-01 | 9.25E-01 |
| <b>CSN1S1</b>     | 3.77  | 2.49E-01 | 1.00E+00 | -1.89 | 5.51E-01 | 9.25E-01 |
| <b>LINC00924</b>  | 0.85  | 2.33E-01 | 1.00E+00 | 0.55  | 5.51E-01 | 9.25E-01 |
| <b>SFI1</b>       | -0.12 | 6.58E-01 | 1.00E+00 | 0.21  | 5.51E-01 | 9.25E-01 |
| <b>LINC00964</b>  | 0.12  | 8.76E-01 | 1.00E+00 | -0.50 | 5.51E-01 | 9.25E-01 |

|             |       |          |          |       |          |          |
|-------------|-------|----------|----------|-------|----------|----------|
| MYT1L       | -3.55 | 1.23E-02 | 6.92E-01 | 0.53  | 5.51E-01 | 9.25E-01 |
| BBS1        | -0.87 | 5.72E-01 | 1.00E+00 | -0.34 | 5.51E-01 | 9.25E-01 |
| SAMD11      | -0.58 | 4.36E-01 | 1.00E+00 | 0.72  | 5.51E-01 | 9.25E-01 |
| XLOC_002071 | -0.43 | 6.60E-01 | 1.00E+00 | -0.60 | 5.51E-01 | 9.25E-01 |
| ILDR2       | -2.50 | 1.10E-01 | 1.00E+00 | 0.83  | 5.51E-01 | 9.25E-01 |
| AES         | -0.17 | 4.53E-01 | 1.00E+00 | 0.29  | 5.51E-01 | 9.25E-01 |
| G36170      | 0.62  | 5.23E-01 | 1.00E+00 | -0.47 | 5.51E-01 | 9.25E-01 |
| LCE1D       | -3.61 | 1.66E-02 | 8.10E-01 | 0.57  | 5.51E-01 | 9.25E-01 |
| DVL1        | -0.07 | 7.53E-01 | 1.00E+00 | 0.41  | 5.51E-01 | 9.25E-01 |
| UBAC2-AS1   | -0.43 | 4.50E-01 | 1.00E+00 | 0.28  | 5.51E-01 | 9.25E-01 |
| AL035446.2  | -1.71 | 6.18E-01 | 1.00E+00 | -0.67 | 5.52E-01 | 9.25E-01 |
| XLOC_001489 | -0.23 | 6.97E-01 | 1.00E+00 | -0.38 | 5.52E-01 | 9.25E-01 |
| FSCN2       | -0.72 | 2.83E-01 | 1.00E+00 | 0.57  | 5.52E-01 | 9.25E-01 |
| UPF2        | 0.08  | 6.56E-01 | 1.00E+00 | 0.16  | 5.52E-01 | 9.25E-01 |
| CD1C        | -0.71 | 1.81E-01 | 1.00E+00 | 0.28  | 5.52E-01 | 9.25E-01 |
| LYPD6B      | 0.32  | 4.49E-01 | 1.00E+00 | -0.44 | 5.52E-01 | 9.25E-01 |
| AC092171.5  | 0.07  | 8.62E-01 | 1.00E+00 | 0.33  | 5.52E-01 | 9.25E-01 |
| TOR1AIP2    | 0.22  | 3.57E-01 | 1.00E+00 | 0.16  | 5.52E-01 | 9.25E-01 |
| LYSMD2      | 0.34  | 3.30E-01 | 1.00E+00 | 0.22  | 5.52E-01 | 9.25E-01 |
| MAP3K9      | 0.22  | 6.37E-01 | 1.00E+00 | 0.35  | 5.52E-01 | 9.25E-01 |
| DEPDC7      | -0.01 | 9.85E-01 | 1.00E+00 | 0.27  | 5.52E-01 | 9.25E-01 |
| TCEAL7      | 0.58  | 4.36E-01 | 1.00E+00 | -0.34 | 5.52E-01 | 9.25E-01 |
| CMTM6       | 0.33  | 3.45E-01 | 1.00E+00 | -0.17 | 5.52E-01 | 9.25E-01 |
| SMG1P1      | -0.17 | 8.52E-01 | 1.00E+00 | 0.33  | 5.52E-01 | 9.25E-01 |
| AC020916.1  | -0.75 | 1.44E-01 | 1.00E+00 | -0.19 | 5.52E-01 | 9.25E-01 |
| AC107398.2  | -1.34 | 4.68E-01 | 1.00E+00 | -0.64 | 5.52E-01 | 9.25E-01 |
| AC103957.2  | 0.79  | 3.43E-01 | 1.00E+00 | 0.46  | 5.52E-01 | 9.25E-01 |
| DIS3L2      | -0.30 | 1.40E-01 | 1.00E+00 | 0.21  | 5.52E-01 | 9.25E-01 |
| MMS22L      | 0.03  | 9.03E-01 | 1.00E+00 | -0.21 | 5.52E-01 | 9.25E-01 |
| ZNF440      | -0.18 | 4.58E-01 | 1.00E+00 | -0.18 | 5.52E-01 | 9.25E-01 |
| G35488      | -0.95 | 3.87E-01 | 1.00E+00 | -0.44 | 5.52E-01 | 9.25E-01 |
| MAK16       | 0.22  | 4.89E-01 | 1.00E+00 | -0.16 | 5.52E-01 | 9.25E-01 |

|                   |        |          |          |       |          |          |
|-------------------|--------|----------|----------|-------|----------|----------|
| <b>KRTAP3-1</b>   | -20.24 | 1.45E-09 | 7.84E-07 | -1.90 | 5.52E-01 | 9.25E-01 |
| <b>SRP54-AS1</b>  | 0.87   | 1.77E-01 | 1.00E+00 | -0.30 | 5.52E-01 | 9.25E-01 |
| <b>DUS3L</b>      | -0.54  | 9.67E-02 | 1.00E+00 | 0.17  | 5.52E-01 | 9.25E-01 |
| <b>TSC1</b>       | 0.47   | 1.23E-01 | 1.00E+00 | 0.12  | 5.52E-01 | 9.25E-01 |
| <b>AL356801.1</b> | -1.71  | 5.60E-01 | 1.00E+00 | -0.75 | 5.53E-01 | 9.25E-01 |
| <b>RAP2A</b>      | 0.05   | 8.67E-01 | 1.00E+00 | 0.22  | 5.53E-01 | 9.25E-01 |
| <b>UNC119</b>     | -0.17  | 4.48E-01 | 1.00E+00 | -0.21 | 5.53E-01 | 9.25E-01 |
| <b>AC036214.2</b> | -0.42  | 2.95E-01 | 1.00E+00 | 0.33  | 5.53E-01 | 9.25E-01 |
| <b>A2M-AS1</b>    | 0.45   | 4.51E-01 | 1.00E+00 | 0.39  | 5.53E-01 | 9.25E-01 |
| <b>CR1L</b>       | -1.73  | 6.12E-01 | 1.00E+00 | 0.87  | 5.53E-01 | 9.25E-01 |
| <b>TMEM184B</b>   | 0.21   | 5.89E-01 | 1.00E+00 | 0.30  | 5.53E-01 | 9.25E-01 |
| <b>NEXN-AS1</b>   | -1.09  | 4.94E-01 | 1.00E+00 | -0.51 | 5.53E-01 | 9.25E-01 |
| <b>TCF7L1-IT1</b> | -1.24  | 7.19E-01 | 1.00E+00 | 1.14  | 5.53E-01 | 9.25E-01 |
| <b>ZNF317</b>     | -0.04  | 8.06E-01 | 1.00E+00 | 0.14  | 5.53E-01 | 9.25E-01 |
| <b>C11orf45</b>   | 0.05   | 8.67E-01 | 1.00E+00 | -0.29 | 5.53E-01 | 9.25E-01 |
| <b>SUSD1</b>      | 0.69   | 1.10E-01 | 1.00E+00 | 0.50  | 5.53E-01 | 9.25E-01 |
| <b>GGA1</b>       | -0.22  | 2.29E-01 | 1.00E+00 | 0.27  | 5.53E-01 | 9.25E-01 |
| <b>FAM98C</b>     | -0.12  | 6.57E-01 | 1.00E+00 | -0.28 | 5.53E-01 | 9.25E-01 |
| <b>UGT2A1</b>     | -1.61  | 4.03E-01 | 1.00E+00 | -1.89 | 5.53E-01 | 9.25E-01 |
| <b>NR4A1</b>      | -2.49  | 4.35E-04 | 8.92E-02 | 0.44  | 5.53E-01 | 9.25E-01 |
| <b>UGT1A6</b>     | -0.83  | 3.51E-01 | 1.00E+00 | -0.45 | 5.53E-01 | 9.25E-01 |
| <b>SOWAHC</b>     | -0.11  | 7.24E-01 | 1.00E+00 | -0.23 | 5.53E-01 | 9.25E-01 |
| <b>SPATA5</b>     | -0.01  | 9.58E-01 | 1.00E+00 | -0.13 | 5.53E-01 | 9.25E-01 |
| <b>AC118344.2</b> | -0.72  | 5.65E-01 | 1.00E+00 | 0.55  | 5.53E-01 | 9.25E-01 |
| <b>HAS3</b>       | -0.25  | 6.66E-01 | 1.00E+00 | 0.53  | 5.54E-01 | 9.25E-01 |
| <b>AP2M1</b>      | -0.05  | 7.75E-01 | 1.00E+00 | 0.10  | 5.54E-01 | 9.25E-01 |
| <b>GGT6</b>       | -0.02  | 9.54E-01 | 1.00E+00 | -0.34 | 5.54E-01 | 9.25E-01 |
| <b>CNN3</b>       | 0.19   | 5.85E-01 | 1.00E+00 | -0.20 | 5.54E-01 | 9.25E-01 |
| <b>AC005842.1</b> | 0.98   | 7.03E-01 | 1.00E+00 | 0.72  | 5.54E-01 | 9.25E-01 |
| <b>LINC01293</b>  | 0.51   | 8.05E-01 | 1.00E+00 | -1.12 | 5.54E-01 | 9.25E-01 |
| <b>BIRC5</b>      | 1.06   | 6.75E-03 | 4.99E-01 | 0.32  | 5.54E-01 | 9.25E-01 |
| <b>WDR34</b>      | -0.26  | 2.88E-01 | 1.00E+00 | 0.13  | 5.54E-01 | 9.25E-01 |

|                   |       |          |          |       |          |          |
|-------------------|-------|----------|----------|-------|----------|----------|
| <b>AC092809.2</b> | -0.89 | 2.73E-01 | 1.00E+00 | -0.55 | 5.54E-01 | 9.25E-01 |
| <b>SYNE1</b>      | 0.09  | 7.23E-01 | 1.00E+00 | 0.19  | 5.54E-01 | 9.25E-01 |
| <b>MIOS</b>       | 0.28  | 2.83E-01 | 1.00E+00 | -0.12 | 5.54E-01 | 9.25E-01 |
| <b>LINC00515</b>  | -2.80 | 3.52E-02 | 1.00E+00 | -0.48 | 5.54E-01 | 9.25E-01 |
| <b>METTL16</b>    | 0.06  | 7.14E-01 | 1.00E+00 | 0.21  | 5.54E-01 | 9.25E-01 |
| <b>ZBTB80S</b>    | 0.22  | 2.48E-01 | 1.00E+00 | -0.18 | 5.54E-01 | 9.25E-01 |
| <b>BMPR2</b>      | -0.12 | 4.75E-01 | 1.00E+00 | 0.13  | 5.54E-01 | 9.25E-01 |
| <b>GMPS</b>       | -0.12 | 5.00E-01 | 1.00E+00 | -0.07 | 5.54E-01 | 9.25E-01 |
| <b>AC008537.2</b> | -0.44 | 7.03E-01 | 1.00E+00 | 0.71  | 5.54E-01 | 9.25E-01 |
| <b>FBXL20</b>     | 0.23  | 2.84E-01 | 1.00E+00 | 0.15  | 5.54E-01 | 9.25E-01 |
| <b>FEZ2</b>       | 0.25  | 4.29E-01 | 1.00E+00 | 0.22  | 5.54E-01 | 9.25E-01 |
| <b>TRAK2</b>      | 0.11  | 7.87E-01 | 1.00E+00 | -0.21 | 5.54E-01 | 9.25E-01 |
| <b>TPMT</b>       | 0.02  | 9.42E-01 | 1.00E+00 | 0.12  | 5.54E-01 | 9.25E-01 |
| <b>AC114490.3</b> | -0.50 | 6.10E-01 | 1.00E+00 | -0.46 | 5.54E-01 | 9.25E-01 |
| <b>ANKRA2</b>     | 0.63  | 2.12E-02 | 8.94E-01 | -0.16 | 5.54E-01 | 9.26E-01 |
| <b>AC138409.2</b> | 1.25  | 9.57E-02 | 1.00E+00 | -0.31 | 5.54E-01 | 9.26E-01 |
| <b>BRMS1L</b>     | 0.17  | 5.27E-01 | 1.00E+00 | 0.18  | 5.54E-01 | 9.26E-01 |
| <b>RPSAP70</b>    | 0.33  | 6.67E-01 | 1.00E+00 | -0.50 | 5.54E-01 | 9.26E-01 |
| <b>SNRPD3</b>     | 0.05  | 7.39E-01 | 1.00E+00 | -0.13 | 5.54E-01 | 9.26E-01 |
| <b>TRPM3</b>      | 1.33  | 2.51E-01 | 1.00E+00 | 0.53  | 5.54E-01 | 9.26E-01 |
| <b>AC016739.1</b> | 0.01  | 9.82E-01 | 1.00E+00 | -0.36 | 5.55E-01 | 9.26E-01 |
| <b>ZNF768</b>     | -0.06 | 7.63E-01 | 1.00E+00 | 0.31  | 5.55E-01 | 9.26E-01 |
| <b>TMSB15A</b>    | -0.72 | 5.90E-01 | 1.00E+00 | 0.44  | 5.55E-01 | 9.26E-01 |
| <b>SSC4D</b>      | 0.65  | 3.43E-01 | 1.00E+00 | 0.32  | 5.55E-01 | 9.26E-01 |
| <b>CHUK</b>       | 0.33  | 2.28E-01 | 1.00E+00 | -0.30 | 5.55E-01 | 9.26E-01 |
| <b>CARD14</b>     | -0.26 | 5.48E-01 | 1.00E+00 | 0.34  | 5.55E-01 | 9.26E-01 |
| <b>EIF2B4</b>     | 0.17  | 4.25E-01 | 1.00E+00 | 0.15  | 5.55E-01 | 9.26E-01 |
| <b>SEC31B</b>     | 0.65  | 3.72E-01 | 1.00E+00 | 0.58  | 5.55E-01 | 9.26E-01 |
| <b>TSPYL1</b>     | 0.11  | 4.60E-01 | 1.00E+00 | 0.22  | 5.55E-01 | 9.26E-01 |
| <b>SYTL4</b>      | 1.15  | 3.04E-02 | 1.00E+00 | 0.35  | 5.55E-01 | 9.26E-01 |
| <b>GBP2</b>       | -0.36 | 1.06E-01 | 1.00E+00 | 0.24  | 5.55E-01 | 9.26E-01 |
| <b>AL135925.1</b> | -0.82 | 5.68E-03 | 4.48E-01 | -0.17 | 5.55E-01 | 9.26E-01 |



|                  |        |          |          |       |          |          |
|------------------|--------|----------|----------|-------|----------|----------|
| <b>PPP1R16B</b>  | 0.83   | 1.53E-01 | 1.00E+00 | 0.39  | 5.55E-01 | 9.26E-01 |
| <b>CELSR2</b>    | -0.34  | 3.28E-01 | 1.00E+00 | 0.34  | 5.55E-01 | 9.26E-01 |
| <b>TRIP6</b>     | -0.11  | 6.71E-01 | 1.00E+00 | 0.22  | 5.55E-01 | 9.26E-01 |
| <b>SLC4A2</b>    | -0.29  | 9.48E-02 | 1.00E+00 | 0.38  | 5.55E-01 | 9.26E-01 |
| <b>MRPS11</b>    | -0.13  | 5.76E-01 | 1.00E+00 | 0.14  | 5.55E-01 | 9.26E-01 |
| <b>BRAP</b>      | 0.04   | 8.24E-01 | 1.00E+00 | -0.12 | 5.55E-01 | 9.26E-01 |
| <b>TMEFF2</b>    | -0.94  | 3.34E-01 | 1.00E+00 | 0.61  | 5.55E-01 | 9.26E-01 |
| <b>C1orf50</b>   | 0.14   | 6.75E-01 | 1.00E+00 | 0.36  | 5.55E-01 | 9.26E-01 |
| <b>GPIHBP1</b>   | 1.14   | 4.17E-02 | 1.00E+00 | -0.45 | 5.55E-01 | 9.26E-01 |
| <b>B3GNT9</b>    | -0.46  | 1.22E-01 | 1.00E+00 | 0.43  | 5.55E-01 | 9.26E-01 |
| <b>PTPN9</b>     | -0.01  | 9.74E-01 | 1.00E+00 | 0.30  | 5.55E-01 | 9.26E-01 |
| <b>ALDH1L1</b>   | 1.44   | 2.25E-01 | 1.00E+00 | -1.84 | 5.55E-01 | 9.26E-01 |
| <b>CLDN5</b>     | 0.48   | 3.46E-01 | 1.00E+00 | -0.36 | 5.55E-01 | 9.26E-01 |
| <b>EVA1B</b>     | 0.12   | 7.04E-01 | 1.00E+00 | 0.40  | 5.55E-01 | 9.26E-01 |
| <b>PPP1R13B</b>  | -0.14  | 5.46E-01 | 1.00E+00 | 0.19  | 5.55E-01 | 9.26E-01 |
| <b>SLA2</b>      | -0.15  | 8.21E-01 | 1.00E+00 | 1.85  | 5.55E-01 | 9.26E-01 |
| <b>HSD17B10</b>  | 0.02   | 9.12E-01 | 1.00E+00 | -0.10 | 5.55E-01 | 9.26E-01 |
| <b>SH3KBP1</b>   | 0.16   | 4.90E-01 | 1.00E+00 | 0.14  | 5.55E-01 | 9.26E-01 |
| <b>IL27RA</b>    | -0.12  | 7.32E-01 | 1.00E+00 | 0.37  | 5.55E-01 | 9.26E-01 |
| <b>ITK</b>       | 0.48   | 4.92E-01 | 1.00E+00 | 1.70  | 5.56E-01 | 9.26E-01 |
| <b>RN7SL689P</b> | -0.14  | 8.61E-01 | 1.00E+00 | -0.31 | 5.56E-01 | 9.26E-01 |
| <b>SYNM</b>      | 0.20   | 7.41E-01 | 1.00E+00 | -0.33 | 5.56E-01 | 9.26E-01 |
| <b>RAB3GAP1</b>  | 0.18   | 3.28E-01 | 1.00E+00 | 0.14  | 5.56E-01 | 9.26E-01 |
| <b>G34931</b>    | -0.59  | 4.22E-01 | 1.00E+00 | 0.67  | 5.56E-01 | 9.26E-01 |
| <b>EMC6</b>      | -2.56  | 3.23E-01 | 1.00E+00 | 0.54  | 5.56E-01 | 9.26E-01 |
| <b>KRT74</b>     | -10.41 | 1.52E-07 | 6.03E-05 | -1.87 | 5.56E-01 | 9.26E-01 |
| <b>GLUD1P2</b>   | -1.46  | 1.82E-01 | 1.00E+00 | -0.60 | 5.56E-01 | 9.26E-01 |
| <b>LINC02354</b> | -3.24  | 8.28E-03 | 5.61E-01 | -0.68 | 5.56E-01 | 9.26E-01 |
| <b>MALINC1</b>   | 0.59   | 3.25E-01 | 1.00E+00 | -0.30 | 5.56E-01 | 9.26E-01 |
| <b>LINC02463</b> | -0.76  | 5.99E-01 | 1.00E+00 | -0.67 | 5.56E-01 | 9.26E-01 |
| <b>LINC01554</b> | -0.20  | 6.23E-01 | 1.00E+00 | -0.24 | 5.56E-01 | 9.26E-01 |
| <b>SLC52A1</b>   | -0.21  | 6.58E-01 | 1.00E+00 | -0.43 | 5.56E-01 | 9.26E-01 |

|                      |       |          |          |       |          |          |
|----------------------|-------|----------|----------|-------|----------|----------|
| <b>MMP24</b>         | -0.46 | 2.43E-01 | 1.00E+00 | -0.58 | 5.56E-01 | 9.26E-01 |
| <b>RBM27</b>         | 0.05  | 8.27E-01 | 1.00E+00 | 0.18  | 5.56E-01 | 9.26E-01 |
| <b>LINC00466</b>     | 0.17  | 9.59E-01 | 1.00E+00 | -1.18 | 5.57E-01 | 9.26E-01 |
| <b>G31022</b>        | 0.64  | 3.24E-01 | 1.00E+00 | -0.31 | 5.57E-01 | 9.26E-01 |
| <b>AC018755.3</b>    | -0.19 | 7.85E-01 | 1.00E+00 | 0.67  | 5.57E-01 | 9.26E-01 |
| <b>WI2-3658N16.1</b> | -0.85 | 1.26E-01 | 1.00E+00 | 0.25  | 5.57E-01 | 9.26E-01 |
| <b>NDUFS6</b>        | -0.07 | 6.70E-01 | 1.00E+00 | -0.16 | 5.57E-01 | 9.26E-01 |
| <b>GET4</b>          | -0.84 | 4.18E-01 | 1.00E+00 | 0.39  | 5.57E-01 | 9.26E-01 |
| <b>TYRO3</b>         | 0.21  | 4.67E-01 | 1.00E+00 | -0.21 | 5.57E-01 | 9.26E-01 |
| <b>DNAH6</b>         | 0.95  | 3.12E-01 | 1.00E+00 | -0.51 | 5.57E-01 | 9.26E-01 |
| <b>PURPL</b>         | -1.37 | 6.00E-01 | 1.00E+00 | 0.80  | 5.57E-01 | 9.26E-01 |
| <b>PPP1R16A</b>      | -0.10 | 7.64E-01 | 1.00E+00 | -0.20 | 5.57E-01 | 9.27E-01 |
| <b>DLX6</b>          | 0.72  | 2.50E-01 | 1.00E+00 | 0.39  | 5.57E-01 | 9.27E-01 |
| <b>MYO1D</b>         | -0.20 | 4.02E-01 | 1.00E+00 | 0.27  | 5.57E-01 | 9.27E-01 |
| <b>PRNP</b>          | -0.02 | 9.06E-01 | 1.00E+00 | 0.08  | 5.57E-01 | 9.27E-01 |
| <b>AC092611.1</b>    | -0.97 | 7.77E-01 | 1.00E+00 | -1.05 | 5.57E-01 | 9.27E-01 |
| <b>LPAR6</b>         | 0.05  | 8.69E-01 | 1.00E+00 | -0.20 | 5.58E-01 | 9.27E-01 |
| <b>ZNF140</b>        | -0.05 | 7.91E-01 | 1.00E+00 | -0.18 | 5.58E-01 | 9.27E-01 |
| <b>AL049844.2</b>    | 0.84  | 6.39E-01 | 1.00E+00 | 0.74  | 5.58E-01 | 9.27E-01 |
| <b>RP11-782C8.5</b>  | -1.81 | 5.87E-01 | 1.00E+00 | -0.50 | 5.58E-01 | 9.27E-01 |
| <b>TVP23A</b>        | -0.09 | 9.08E-01 | 1.00E+00 | 0.52  | 5.58E-01 | 9.27E-01 |
| <b>SAR1A</b>         | 0.43  | 1.21E-01 | 1.00E+00 | -0.16 | 5.58E-01 | 9.27E-01 |
| <b>CTBP2</b>         | 0.21  | 4.70E-01 | 1.00E+00 | 0.18  | 5.58E-01 | 9.27E-01 |
| <b>AC016730.1</b>    | 0.12  | 8.90E-01 | 1.00E+00 | -0.66 | 5.58E-01 | 9.27E-01 |
| <b>DOLK</b>          | 0.02  | 9.28E-01 | 1.00E+00 | 0.13  | 5.58E-01 | 9.27E-01 |
| <b>RPL22P24</b>      | -0.38 | 5.68E-01 | 1.00E+00 | 0.52  | 5.58E-01 | 9.27E-01 |
| <b>NTMT1</b>         | -0.12 | 5.97E-01 | 1.00E+00 | 0.15  | 5.58E-01 | 9.27E-01 |
| <b>DNAJC19P9</b>     | 1.78  | 6.05E-01 | 1.00E+00 | -0.39 | 5.58E-01 | 9.27E-01 |
| <b>CPD</b>           | 0.25  | 3.25E-01 | 1.00E+00 | 0.18  | 5.58E-01 | 9.27E-01 |
| <b>GPR3</b>          | -1.16 | 2.14E-01 | 1.00E+00 | 0.62  | 5.59E-01 | 9.27E-01 |
| <b>HDAC6</b>         | -0.26 | 1.27E-01 | 1.00E+00 | 0.25  | 5.59E-01 | 9.27E-01 |
| <b>PDZPH1P</b>       | -2.63 | 1.81E-01 | 1.00E+00 | -0.88 | 5.59E-01 | 9.27E-01 |

|             |       |          |          |       |          |          |
|-------------|-------|----------|----------|-------|----------|----------|
| PARD6A      | -0.32 | 4.56E-01 | 1.00E+00 | 0.43  | 5.59E-01 | 9.27E-01 |
| ZC3H18      | -0.12 | 5.97E-01 | 1.00E+00 | 0.35  | 5.59E-01 | 9.27E-01 |
| AC137936.2  | 1.74  | 1.66E-01 | 1.00E+00 | 0.83  | 5.59E-01 | 9.27E-01 |
| RNFT1-DT    | 1.73  | 6.11E-01 | 1.00E+00 | 0.50  | 5.59E-01 | 9.27E-01 |
| ADRA1D      | -0.08 | 9.13E-01 | 1.00E+00 | 0.66  | 5.59E-01 | 9.27E-01 |
| ST13P19     | -0.37 | 8.30E-01 | 1.00E+00 | -0.35 | 5.59E-01 | 9.27E-01 |
| ZNF749      | -0.51 | 3.10E-01 | 1.00E+00 | 0.21  | 5.59E-01 | 9.27E-01 |
| XLOC_014103 | -1.37 | 1.79E-02 | 8.38E-01 | -0.36 | 5.59E-01 | 9.27E-01 |
| WDR82       | 0.08  | 5.28E-01 | 1.00E+00 | 0.24  | 5.59E-01 | 9.27E-01 |
| ROR1-AS1    | 2.71  | 2.25E-01 | 1.00E+00 | -0.51 | 5.59E-01 | 9.27E-01 |
| AP001107.1  | 1.15  | 5.56E-01 | 1.00E+00 | 0.66  | 5.59E-01 | 9.27E-01 |
| ZNF274      | 0.08  | 6.95E-01 | 1.00E+00 | -0.14 | 5.59E-01 | 9.27E-01 |
| SSR4        | -0.28 | 9.13E-02 | 1.00E+00 | 0.15  | 5.59E-01 | 9.27E-01 |
| XLOC_011766 | 0.60  | 7.55E-01 | 1.00E+00 | 0.70  | 5.59E-01 | 9.27E-01 |
| PKIB        | 0.02  | 9.66E-01 | 1.00E+00 | -0.35 | 5.59E-01 | 9.27E-01 |
| MRPS9       | -0.21 | 2.98E-01 | 1.00E+00 | -0.21 | 5.59E-01 | 9.27E-01 |
| FBLN5       | 0.57  | 2.39E-01 | 1.00E+00 | 0.29  | 5.59E-01 | 9.27E-01 |
| EFCAB1      | 0.18  | 6.03E-01 | 1.00E+00 | -0.38 | 5.59E-01 | 9.27E-01 |
| TSHZ2       | 0.33  | 3.25E-01 | 1.00E+00 | 0.17  | 5.59E-01 | 9.27E-01 |
| LINC00184   | 2.42  | 3.59E-01 | 1.00E+00 | -0.87 | 5.59E-01 | 9.27E-01 |
| LRP11       | 0.46  | 3.10E-01 | 1.00E+00 | -0.37 | 5.59E-01 | 9.27E-01 |
| AL691403.2  | -3.61 | 3.44E-02 | 1.00E+00 | 0.55  | 5.59E-01 | 9.27E-01 |
| RPL7AP66    | 0.39  | 6.32E-01 | 1.00E+00 | 0.52  | 5.59E-01 | 9.27E-01 |
| ATP1A1      | -0.04 | 9.09E-01 | 1.00E+00 | 0.26  | 5.59E-01 | 9.27E-01 |
| AC099329.2  | -0.70 | 6.73E-01 | 1.00E+00 | 0.73  | 5.59E-01 | 9.27E-01 |
| CENPX       | -0.21 | 3.27E-01 | 1.00E+00 | 0.17  | 5.59E-01 | 9.27E-01 |
| DAGLB       | 0.23  | 3.55E-01 | 1.00E+00 | 0.20  | 5.59E-01 | 9.27E-01 |
| DIMT1       | 0.00  | 9.99E-01 | 1.00E+00 | 0.13  | 5.59E-01 | 9.27E-01 |
| KIF1C       | 0.06  | 8.09E-01 | 1.00E+00 | 0.30  | 5.60E-01 | 9.27E-01 |
| G3900       | 0.21  | 8.28E-01 | 1.00E+00 | -0.40 | 5.60E-01 | 9.27E-01 |
| DNER        | 0.00  | 9.95E-01 | 1.00E+00 | -0.44 | 5.60E-01 | 9.27E-01 |
| AL049840.2  | 0.07  | 9.60E-01 | 1.00E+00 | -0.52 | 5.60E-01 | 9.27E-01 |

|             |       |          |          |       |          |          |
|-------------|-------|----------|----------|-------|----------|----------|
| USP7        | 0.07  | 7.73E-01 | 1.00E+00 | -0.19 | 5.60E-01 | 9.27E-01 |
| AL139383.1  | -0.49 | 4.94E-01 | 1.00E+00 | -0.31 | 5.60E-01 | 9.27E-01 |
| TPST2       | 0.20  | 4.37E-01 | 1.00E+00 | 0.14  | 5.60E-01 | 9.27E-01 |
| SLC52A3     | 0.70  | 7.65E-02 | 1.00E+00 | -0.36 | 5.60E-01 | 9.27E-01 |
| AL604028.2  | 0.89  | 4.31E-01 | 1.00E+00 | 0.58  | 5.60E-01 | 9.27E-01 |
| BCAS2P2     | -1.12 | 7.40E-01 | 1.00E+00 | -0.35 | 5.60E-01 | 9.27E-01 |
| MRPL37P1    | -0.34 | 8.14E-01 | 1.00E+00 | -0.66 | 5.60E-01 | 9.27E-01 |
| ROGDI       | -0.46 | 3.88E-01 | 1.00E+00 | -0.15 | 5.60E-01 | 9.27E-01 |
| AC022915.2  | 0.76  | 4.41E-01 | 1.00E+00 | -0.81 | 5.60E-01 | 9.27E-01 |
| MIR4432HG   | -0.76 | 1.13E-01 | 1.00E+00 | 0.46  | 5.60E-01 | 9.27E-01 |
| FOPNL       | 0.40  | 9.73E-02 | 1.00E+00 | -0.19 | 5.60E-01 | 9.27E-01 |
| LINC01070   | 3.28  | 2.05E-01 | 1.00E+00 | -0.78 | 5.60E-01 | 9.27E-01 |
| COX6B2      | -1.54 | 7.01E-02 | 1.00E+00 | -0.73 | 5.60E-01 | 9.27E-01 |
| STAG3L1     | 0.14  | 8.19E-01 | 1.00E+00 | 0.22  | 5.60E-01 | 9.27E-01 |
| SSTR1       | 0.26  | 6.42E-01 | 1.00E+00 | 0.59  | 5.60E-01 | 9.28E-01 |
| AC022148.1  | -2.58 | 1.71E-01 | 1.00E+00 | 0.94  | 5.60E-01 | 9.28E-01 |
| VLDLR       | 1.06  | 1.61E-01 | 1.00E+00 | -0.31 | 5.60E-01 | 9.28E-01 |
| AC002350.1  | 0.08  | 9.29E-01 | 1.00E+00 | 0.29  | 5.61E-01 | 9.28E-01 |
| CYP4F12     | -0.01 | 9.83E-01 | 1.00E+00 | -0.28 | 5.61E-01 | 9.28E-01 |
| AC040970.1  | 0.38  | 6.77E-01 | 1.00E+00 | 0.40  | 5.61E-01 | 9.28E-01 |
| COG1        | -0.18 | 3.49E-01 | 1.00E+00 | -0.10 | 5.61E-01 | 9.28E-01 |
| PLCXD3      | 0.55  | 3.32E-01 | 1.00E+00 | 0.50  | 5.61E-01 | 9.28E-01 |
| MORF4L2-AS1 | 0.02  | 9.93E-01 | 1.00E+00 | -0.51 | 5.61E-01 | 9.28E-01 |
| CEACAM6     | -0.51 | 4.10E-01 | 1.00E+00 | -0.37 | 5.61E-01 | 9.28E-01 |
| PHF23       | 0.01  | 9.76E-01 | 1.00E+00 | 0.28  | 5.61E-01 | 9.28E-01 |
| VNN2        | 0.57  | 5.33E-01 | 1.00E+00 | 0.63  | 5.61E-01 | 9.28E-01 |
| CLDN7       | 0.64  | 3.73E-01 | 1.00E+00 | -0.23 | 5.61E-01 | 9.28E-01 |
| AC007389.3  | -0.70 | 4.92E-01 | 1.00E+00 | -0.68 | 5.61E-01 | 9.28E-01 |
| METTL15     | 0.01  | 9.66E-01 | 1.00E+00 | -0.14 | 5.61E-01 | 9.28E-01 |
| TAS1R1      | 0.55  | 5.47E-01 | 1.00E+00 | -0.75 | 5.61E-01 | 9.28E-01 |
| FPR2        | 0.27  | 8.77E-01 | 1.00E+00 | 1.83  | 5.61E-01 | 9.28E-01 |
| SRP14P2     | 0.56  | 8.71E-01 | 1.00E+00 | -0.38 | 5.61E-01 | 9.28E-01 |

|                     |       |          |          |       |          |          |
|---------------------|-------|----------|----------|-------|----------|----------|
| <b>XLOC_004829</b>  | -2.53 | 3.13E-02 | 1.00E+00 | -0.36 | 5.61E-01 | 9.28E-01 |
| <b>AL080317.3</b>   | 0.44  | 7.38E-01 | 1.00E+00 | -0.38 | 5.61E-01 | 9.28E-01 |
| <b>HIST3H2A</b>     | -0.31 | 5.19E-01 | 1.00E+00 | 0.29  | 5.61E-01 | 9.28E-01 |
| <b>NKAPD1</b>       | 0.19  | 2.99E-01 | 1.00E+00 | 0.11  | 5.62E-01 | 9.28E-01 |
| <b>ARF5</b>         | -0.15 | 5.61E-01 | 1.00E+00 | 0.12  | 5.62E-01 | 9.28E-01 |
| <b>AC008105.3</b>   | -1.32 | 4.63E-01 | 1.00E+00 | 0.63  | 5.62E-01 | 9.28E-01 |
| <b>IGFBP5</b>       | 0.74  | 1.49E-01 | 1.00E+00 | 0.29  | 5.62E-01 | 9.28E-01 |
| <b>CNTROB</b>       | -0.11 | 6.13E-01 | 1.00E+00 | 0.28  | 5.62E-01 | 9.28E-01 |
| <b>MGLL</b>         | 0.69  | 1.89E-01 | 1.00E+00 | -0.25 | 5.62E-01 | 9.28E-01 |
| <b>RP11-417J8.6</b> | 0.74  | 4.69E-01 | 1.00E+00 | 0.47  | 5.62E-01 | 9.28E-01 |
| <b>SP3</b>          | 0.04  | 8.62E-01 | 1.00E+00 | -0.16 | 5.62E-01 | 9.28E-01 |
| <b>MUC3A</b>        | -0.40 | 7.82E-01 | 1.00E+00 | 0.68  | 5.62E-01 | 9.28E-01 |
| <b>PANK2</b>        | 0.18  | 3.82E-01 | 1.00E+00 | -0.30 | 5.62E-01 | 9.28E-01 |
| <b>DDX3X</b>        | 0.05  | 8.53E-01 | 1.00E+00 | 0.11  | 5.62E-01 | 9.28E-01 |
| <b>PYGB</b>         | -0.16 | 6.74E-01 | 1.00E+00 | -0.26 | 5.62E-01 | 9.28E-01 |
| <b>AC124798.1</b>   | 0.19  | 7.14E-01 | 1.00E+00 | -0.43 | 5.62E-01 | 9.28E-01 |
| <b>PKIA-AS1</b>     | -2.49 | 2.47E-01 | 1.00E+00 | 0.58  | 5.62E-01 | 9.28E-01 |
| <b>PHC1</b>         | 0.10  | 8.04E-01 | 1.00E+00 | 0.39  | 5.62E-01 | 9.28E-01 |
| <b>KIAA0040</b>     | -0.15 | 6.29E-01 | 1.00E+00 | -0.32 | 5.62E-01 | 9.28E-01 |
| <b>LINC00622</b>    | 1.37  | 2.20E-01 | 1.00E+00 | 1.46  | 5.62E-01 | 9.28E-01 |
| <b>AC068522.1</b>   | -0.23 | 9.23E-01 | 1.00E+00 | 0.31  | 5.62E-01 | 9.28E-01 |
| <b>PERM1</b>        | 0.21  | 6.52E-01 | 1.00E+00 | 0.33  | 5.62E-01 | 9.28E-01 |
| <b>WASH2P</b>       | 0.52  | 7.37E-01 | 1.00E+00 | 0.31  | 5.62E-01 | 9.28E-01 |
| <b>AC083973.1</b>   | -1.41 | 4.71E-02 | 1.00E+00 | 0.38  | 5.62E-01 | 9.28E-01 |
| <b>ZNF549</b>       | 0.18  | 6.50E-01 | 1.00E+00 | -0.27 | 5.62E-01 | 9.28E-01 |
| <b>AC022107.1</b>   | -0.29 | 4.51E-01 | 1.00E+00 | 0.35  | 5.62E-01 | 9.28E-01 |
| <b>SART1</b>        | -0.17 | 4.23E-01 | 1.00E+00 | 0.32  | 5.62E-01 | 9.28E-01 |
| <b>NSFL1C</b>       | -0.12 | 5.53E-01 | 1.00E+00 | 0.10  | 5.62E-01 | 9.28E-01 |
| <b>UTY</b>          | 0.34  | 5.56E-01 | 1.00E+00 | -0.50 | 5.63E-01 | 9.28E-01 |
| <b>AC138356.2</b>   | 0.16  | 8.38E-01 | 1.00E+00 | -0.28 | 5.63E-01 | 9.28E-01 |
| <b>G35086</b>       | 0.13  | 8.75E-01 | 1.00E+00 | -0.46 | 5.63E-01 | 9.28E-01 |
| <b>CYP51A1P2</b>    | 1.32  | 6.04E-01 | 1.00E+00 | -0.30 | 5.63E-01 | 9.28E-01 |

|                     |       |          |          |       |          |          |
|---------------------|-------|----------|----------|-------|----------|----------|
| <b>IBA57-DT</b>     | -0.71 | 6.37E-01 | 1.00E+00 | -0.66 | 5.63E-01 | 9.28E-01 |
| <b>AF001548.2</b>   | 0.50  | 3.63E-01 | 1.00E+00 | -0.35 | 5.63E-01 | 9.28E-01 |
| <b>SYNPO2</b>       | -0.28 | 5.84E-01 | 1.00E+00 | 0.24  | 5.63E-01 | 9.28E-01 |
| <b>EPHB1</b>        | -0.04 | 9.11E-01 | 1.00E+00 | -0.26 | 5.63E-01 | 9.28E-01 |
| <b>INSYN1</b>       | 0.20  | 6.20E-01 | 1.00E+00 | -0.54 | 5.63E-01 | 9.28E-01 |
| <b>ZNF516</b>       | -0.19 | 4.42E-01 | 1.00E+00 | 0.21  | 5.63E-01 | 9.28E-01 |
| <b>NSMCE2</b>       | -0.10 | 6.69E-01 | 1.00E+00 | -0.12 | 5.63E-01 | 9.28E-01 |
| <b>HSBP1</b>        | 0.02  | 9.14E-01 | 1.00E+00 | -0.17 | 5.63E-01 | 9.28E-01 |
| <b>MAGEH1</b>       | 0.16  | 6.32E-01 | 1.00E+00 | 0.18  | 5.63E-01 | 9.28E-01 |
| <b>PPP1R21</b>      | -0.07 | 6.95E-01 | 1.00E+00 | -0.10 | 5.63E-01 | 9.28E-01 |
| <b>MEIS2</b>        | -0.03 | 9.41E-01 | 1.00E+00 | 0.27  | 5.63E-01 | 9.28E-01 |
| <b>DOCK1</b>        | 0.29  | 2.69E-01 | 1.00E+00 | 0.14  | 5.63E-01 | 9.28E-01 |
| <b>SLU7</b>         | 0.11  | 5.02E-01 | 1.00E+00 | -0.11 | 5.63E-01 | 9.28E-01 |
| <b>LINS1</b>        | -0.08 | 8.41E-01 | 1.00E+00 | -0.19 | 5.63E-01 | 9.28E-01 |
| <b>ASCL2</b>        | -0.09 | 8.13E-01 | 1.00E+00 | -0.51 | 5.63E-01 | 9.28E-01 |
| <b>CNBD2</b>        | 0.04  | 9.69E-01 | 1.00E+00 | -0.53 | 5.63E-01 | 9.28E-01 |
| <b>SPAG9</b>        | -0.01 | 9.77E-01 | 1.00E+00 | 0.21  | 5.63E-01 | 9.28E-01 |
| <b>SREBF2</b>       | 0.07  | 8.26E-01 | 1.00E+00 | -0.32 | 5.63E-01 | 9.28E-01 |
| <b>LINC00235</b>    | -0.12 | 7.84E-01 | 1.00E+00 | 0.49  | 5.63E-01 | 9.28E-01 |
| <b>PFN1P1</b>       | 0.83  | 7.11E-01 | 1.00E+00 | -0.39 | 5.63E-01 | 9.28E-01 |
| <b>RAB11FIP3</b>    | -0.24 | 4.07E-01 | 1.00E+00 | 0.49  | 5.64E-01 | 9.28E-01 |
| <b>RAP1GDS1</b>     | 0.04  | 8.30E-01 | 1.00E+00 | 0.07  | 5.64E-01 | 9.28E-01 |
| <b>RRAGB</b>        | 0.49  | 2.60E-02 | 9.40E-01 | -0.16 | 5.64E-01 | 9.28E-01 |
| <b>CXCL6</b>        | 2.30  | 3.58E-01 | 1.00E+00 | 1.84  | 5.64E-01 | 9.28E-01 |
| <b>ZNF418</b>       | 0.12  | 7.75E-01 | 1.00E+00 | -0.33 | 5.64E-01 | 9.28E-01 |
| <b>MTSS1</b>        | -0.14 | 6.12E-01 | 1.00E+00 | 0.14  | 5.64E-01 | 9.28E-01 |
| <b>ARHGEF26-AS1</b> | -0.40 | 6.70E-01 | 1.00E+00 | 0.44  | 5.64E-01 | 9.28E-01 |
| <b>ADARB1</b>       | 0.00  | 9.95E-01 | 1.00E+00 | 0.31  | 5.64E-01 | 9.28E-01 |
| <b>AL157786.1</b>   | 1.93  | 2.42E-01 | 1.00E+00 | 0.56  | 5.64E-01 | 9.28E-01 |
| <b>TRAPPC2</b>      | 0.39  | 2.34E-01 | 1.00E+00 | -0.17 | 5.64E-01 | 9.28E-01 |
| <b>EMC9</b>         | -0.09 | 7.86E-01 | 1.00E+00 | -0.15 | 5.64E-01 | 9.28E-01 |
| <b>DGLUCY</b>       | -0.17 | 4.25E-01 | 1.00E+00 | 0.10  | 5.64E-01 | 9.28E-01 |

|                    |       |          |          |       |          |          |
|--------------------|-------|----------|----------|-------|----------|----------|
| <b>XLOC_007999</b> | 0.52  | 7.16E-01 | 1.00E+00 | -0.53 | 5.64E-01 | 9.28E-01 |
| <b>SCAMP3</b>      | -0.10 | 5.59E-01 | 1.00E+00 | -0.13 | 5.64E-01 | 9.28E-01 |
| <b>MATN1-AS1</b>   | 0.68  | 5.03E-01 | 1.00E+00 | -0.53 | 5.64E-01 | 9.28E-01 |
| <b>AC012442.1</b>  | 0.02  | 9.86E-01 | 1.00E+00 | -0.49 | 5.64E-01 | 9.28E-01 |
| <b>DCC</b>         | 0.46  | 5.44E-01 | 1.00E+00 | -0.77 | 5.64E-01 | 9.28E-01 |
| <b>EBF1</b>        | 0.58  | 2.84E-01 | 1.00E+00 | -0.28 | 5.64E-01 | 9.28E-01 |
| <b>MROH3P</b>      | -2.40 | 3.02E-01 | 1.00E+00 | 0.69  | 5.64E-01 | 9.28E-01 |
| <b>SYBU</b>        | 0.61  | 1.24E-02 | 6.93E-01 | -0.21 | 5.64E-01 | 9.28E-01 |
| <b>AC136604.3</b>  | -1.13 | 4.83E-01 | 1.00E+00 | -0.40 | 5.64E-01 | 9.28E-01 |
| <b>DHX16</b>       | -0.14 | 5.33E-01 | 1.00E+00 | 0.18  | 5.64E-01 | 9.28E-01 |
| <b>AC006970.1</b>  | NA    | NA       | NA       | -0.91 | 5.64E-01 | 9.28E-01 |
| <b>RANGRF</b>      | -0.23 | 9.43E-01 | 1.00E+00 | -0.39 | 5.64E-01 | 9.28E-01 |
| <b>G7822</b>       | 0.12  | 8.94E-01 | 1.00E+00 | -0.44 | 5.64E-01 | 9.29E-01 |
| <b>C1QTNF7</b>     | 1.08  | 2.55E-02 | 9.29E-01 | 0.42  | 5.64E-01 | 9.29E-01 |
| <b>RAB9A</b>       | 0.10  | 6.44E-01 | 1.00E+00 | -0.15 | 5.65E-01 | 9.29E-01 |
| <b>MED27</b>       | -0.39 | 1.19E-01 | 1.00E+00 | 0.10  | 5.65E-01 | 9.29E-01 |
| <b>AP000254.1</b>  | 1.10  | 1.43E-01 | 1.00E+00 | -0.26 | 5.65E-01 | 9.29E-01 |
| <b>TMEM44-AS1</b>  | 0.08  | 8.42E-01 | 1.00E+00 | -0.22 | 5.65E-01 | 9.29E-01 |
| <b>BCL2</b>        | 0.35  | 1.20E-01 | 1.00E+00 | 0.27  | 5.65E-01 | 9.29E-01 |
| <b>AC241585.1</b>  | -1.76 | 8.72E-02 | 1.00E+00 | 0.42  | 5.65E-01 | 9.29E-01 |
| <b>PCNA</b>        | -0.16 | 5.20E-01 | 1.00E+00 | 0.12  | 5.65E-01 | 9.29E-01 |
| <b>PPEF1</b>       | -1.68 | 5.56E-02 | 1.00E+00 | 0.70  | 5.65E-01 | 9.29E-01 |
| <b>AC005840.3</b>  | 1.56  | 4.48E-01 | 1.00E+00 | 0.73  | 5.65E-01 | 9.29E-01 |
| <b>RHBDD2</b>      | -0.27 | 2.00E-01 | 1.00E+00 | 0.08  | 5.65E-01 | 9.29E-01 |
| <b>VSIG2</b>       | 0.10  | 8.78E-01 | 1.00E+00 | -0.38 | 5.65E-01 | 9.29E-01 |
| <b>MUC16</b>       | -0.17 | 8.90E-01 | 1.00E+00 | -0.58 | 5.65E-01 | 9.29E-01 |
| <b>SNX4</b>        | 0.33  | 1.77E-01 | 1.00E+00 | -0.15 | 5.65E-01 | 9.29E-01 |
| <b>ZNF69</b>       | -0.61 | 3.96E-01 | 1.00E+00 | 0.28  | 5.65E-01 | 9.29E-01 |
| <b>WWTR1-AS1</b>   | -0.10 | 9.05E-01 | 1.00E+00 | 0.54  | 5.65E-01 | 9.29E-01 |
| <b>XLOC_007993</b> | -1.24 | 2.70E-02 | 9.59E-01 | 0.41  | 5.65E-01 | 9.29E-01 |
| <b>CENPC</b>       | -0.13 | 5.16E-01 | 1.00E+00 | -0.14 | 5.65E-01 | 9.29E-01 |
| <b>GRHL1</b>       | -0.06 | 8.82E-01 | 1.00E+00 | -0.25 | 5.65E-01 | 9.29E-01 |

|             |       |          |          |       |          |          |
|-------------|-------|----------|----------|-------|----------|----------|
| ZG16B       | 0.09  | 8.84E-01 | 1.00E+00 | -0.22 | 5.65E-01 | 9.29E-01 |
| XLOC_006630 | -0.24 | 7.84E-01 | 1.00E+00 | -0.39 | 5.65E-01 | 9.29E-01 |
| TMEM192     | 0.27  | 1.96E-01 | 1.00E+00 | -0.11 | 5.66E-01 | 9.29E-01 |
| AC084871.1  | 2.74  | 1.93E-01 | 1.00E+00 | 0.39  | 5.66E-01 | 9.29E-01 |
| AC023794.3  | -0.42 | 5.02E-01 | 1.00E+00 | 0.43  | 5.66E-01 | 9.29E-01 |
| TFB2M       | 0.29  | 3.43E-01 | 1.00E+00 | -0.15 | 5.66E-01 | 9.29E-01 |
| ACTG1P3     | 0.64  | 6.88E-01 | 1.00E+00 | -0.89 | 5.66E-01 | 9.29E-01 |
| KRTAP13-2   | -6.43 | 2.82E-02 | 9.75E-01 | 1.48  | 5.66E-01 | 9.29E-01 |
| AC009414.2  | 0.08  | 8.75E-01 | 1.00E+00 | -0.34 | 5.66E-01 | 9.29E-01 |
| KRTAP10-6   | -1.60 | 4.78E-01 | 1.00E+00 | 1.81  | 5.66E-01 | 9.29E-01 |
| G23773      | -2.50 | 1.30E-01 | 1.00E+00 | -0.66 | 5.66E-01 | 9.29E-01 |
| AC006378.1  | -0.50 | 5.20E-01 | 1.00E+00 | 0.34  | 5.66E-01 | 9.29E-01 |
| DDX54       | -0.25 | 2.72E-01 | 1.00E+00 | 0.27  | 5.66E-01 | 9.29E-01 |
| ALYREF      | -0.14 | 5.73E-01 | 1.00E+00 | -0.37 | 5.66E-01 | 9.29E-01 |
| ABHD14A     | -1.16 | 7.66E-02 | 1.00E+00 | -0.33 | 5.66E-01 | 9.29E-01 |
| NBPF24      | 0.59  | 3.77E-01 | 1.00E+00 | 0.42  | 5.66E-01 | 9.29E-01 |
| HSD17B11    | 0.32  | 4.36E-01 | 1.00E+00 | -0.19 | 5.66E-01 | 9.29E-01 |
| TAF4        | -0.09 | 7.44E-01 | 1.00E+00 | 0.26  | 5.66E-01 | 9.29E-01 |
| AC015712.6  | 0.75  | 5.41E-01 | 1.00E+00 | -0.65 | 5.66E-01 | 9.29E-01 |
| RFX2        | -0.27 | 5.86E-01 | 1.00E+00 | 0.17  | 5.66E-01 | 9.29E-01 |
| FLT3        | -0.18 | 7.51E-01 | 1.00E+00 | -0.47 | 5.66E-01 | 9.29E-01 |
| SREBF1      | -0.33 | 3.33E-01 | 1.00E+00 | -0.42 | 5.66E-01 | 9.29E-01 |
| CHODL       | -0.60 | 4.23E-02 | 1.00E+00 | -0.25 | 5.66E-01 | 9.29E-01 |
| G19261      | -1.16 | 1.73E-01 | 1.00E+00 | -0.54 | 5.66E-01 | 9.29E-01 |
| USP24       | 0.34  | 1.91E-01 | 1.00E+00 | 0.23  | 5.66E-01 | 9.29E-01 |
| CSF1        | 0.06  | 8.46E-01 | 1.00E+00 | 0.38  | 5.66E-01 | 9.29E-01 |
| ZNF674-AS1  | 0.22  | 6.24E-01 | 1.00E+00 | 0.25  | 5.66E-01 | 9.29E-01 |
| SIKE1       | 0.25  | 3.19E-01 | 1.00E+00 | -0.14 | 5.66E-01 | 9.29E-01 |
| EIF4BP7     | 0.19  | 7.07E-01 | 1.00E+00 | 0.25  | 5.66E-01 | 9.29E-01 |
| AP006219.1  | -0.18 | 9.23E-01 | 1.00E+00 | 0.84  | 5.67E-01 | 9.29E-01 |
| MGC4771     | 3.39  | 1.63E-01 | 1.00E+00 | -0.45 | 5.67E-01 | 9.29E-01 |
| FAM166B     | -0.62 | 2.19E-01 | 1.00E+00 | -0.46 | 5.67E-01 | 9.29E-01 |



|             |       |          |          |       |          |          |
|-------------|-------|----------|----------|-------|----------|----------|
| GPATCH4     | -0.18 | 4.49E-01 | 1.00E+00 | 0.16  | 5.67E-01 | 9.29E-01 |
| AC079834.2  | -0.82 | 1.86E-01 | 1.00E+00 | -0.34 | 5.67E-01 | 9.29E-01 |
| BNC2        | -0.09 | 8.52E-01 | 1.00E+00 | 0.21  | 5.67E-01 | 9.29E-01 |
| FAM161B     | 0.29  | 3.81E-01 | 1.00E+00 | -0.23 | 5.67E-01 | 9.29E-01 |
| B4GALT7     | 0.02  | 9.23E-01 | 1.00E+00 | -0.14 | 5.67E-01 | 9.29E-01 |
| AL162718.1  | -1.91 | 4.97E-01 | 1.00E+00 | -0.51 | 5.67E-01 | 9.29E-01 |
| UVSSA       | -0.08 | 8.17E-01 | 1.00E+00 | 0.16  | 5.67E-01 | 9.29E-01 |
| CA3         | 0.39  | 6.40E-01 | 1.00E+00 | -1.45 | 5.67E-01 | 9.29E-01 |
| ACTBP2      | 0.39  | 9.10E-01 | 1.00E+00 | 0.47  | 5.67E-01 | 9.29E-01 |
| AC010273.2  | -0.12 | 9.73E-01 | 1.00E+00 | 0.63  | 5.67E-01 | 9.29E-01 |
| IGLV9-49    | 2.25  | 5.10E-01 | 1.00E+00 | 1.60  | 5.67E-01 | 9.29E-01 |
| DNASE2      | 0.07  | 7.09E-01 | 1.00E+00 | 0.13  | 5.67E-01 | 9.29E-01 |
| TBC1D15     | 0.08  | 7.39E-01 | 1.00E+00 | -0.09 | 5.67E-01 | 9.29E-01 |
| ITGAV       | 0.00  | 9.87E-01 | 1.00E+00 | 0.15  | 5.67E-01 | 9.29E-01 |
| KLHL2P1     | -3.23 | 1.61E-01 | 1.00E+00 | 0.52  | 5.67E-01 | 9.29E-01 |
| CSTF1       | 0.14  | 4.32E-01 | 1.00E+00 | -0.14 | 5.67E-01 | 9.29E-01 |
| HECTD1      | 0.13  | 5.70E-01 | 1.00E+00 | 0.15  | 5.67E-01 | 9.29E-01 |
| XLOC_008072 | -0.69 | 5.84E-02 | 1.00E+00 | -0.32 | 5.68E-01 | 9.29E-01 |
| G4330       | -1.26 | 4.83E-02 | 1.00E+00 | 0.46  | 5.68E-01 | 9.29E-01 |
| BCS1L       | -0.13 | 5.59E-01 | 1.00E+00 | -0.15 | 5.68E-01 | 9.29E-01 |
| CHL1        | -0.10 | 7.72E-01 | 1.00E+00 | -0.23 | 5.68E-01 | 9.29E-01 |
| AC087071.1  | -0.82 | 7.31E-01 | 1.00E+00 | -0.70 | 5.68E-01 | 9.29E-01 |
| AL133342.1  | -0.93 | 7.87E-01 | 1.00E+00 | -0.98 | 5.68E-01 | 9.29E-01 |
| ZNF428      | -0.12 | 7.68E-01 | 1.00E+00 | 0.29  | 5.68E-01 | 9.29E-01 |
| TMEM14DP    | 1.93  | 5.74E-01 | 1.00E+00 | -0.31 | 5.68E-01 | 9.29E-01 |
| RPSAP9      | -1.04 | 2.14E-01 | 1.00E+00 | -0.28 | 5.68E-01 | 9.29E-01 |
| ZNF728      | -2.24 | 1.56E-01 | 1.00E+00 | 0.84  | 5.68E-01 | 9.30E-01 |
| TCTEX1D4    | -0.87 | 5.30E-01 | 1.00E+00 | 0.64  | 5.68E-01 | 9.30E-01 |
| VIM         | 0.12  | 7.40E-01 | 1.00E+00 | 0.19  | 5.68E-01 | 9.30E-01 |
| ADORA3      | 0.77  | 4.00E-01 | 1.00E+00 | 0.45  | 5.68E-01 | 9.30E-01 |
| XLOC_003364 | -3.06 | 1.10E-01 | 1.00E+00 | -0.67 | 5.68E-01 | 9.30E-01 |
| SSNA1       | -0.12 | 6.25E-01 | 1.00E+00 | 0.11  | 5.68E-01 | 9.30E-01 |

|                    |       |          |          |       |          |          |
|--------------------|-------|----------|----------|-------|----------|----------|
| <b>CDK8</b>        | 0.03  | 9.04E-01 | 1.00E+00 | 0.30  | 5.68E-01 | 9.30E-01 |
| <b>LINC00702</b>   | 0.34  | 5.11E-01 | 1.00E+00 | -0.32 | 5.68E-01 | 9.30E-01 |
| <b>SLC1A4</b>      | -0.14 | 6.14E-01 | 1.00E+00 | -0.22 | 5.68E-01 | 9.30E-01 |
| <b>LINC00877</b>   | 0.76  | 5.18E-01 | 1.00E+00 | 0.43  | 5.68E-01 | 9.30E-01 |
| <b>RABIF</b>       | 0.13  | 5.04E-01 | 1.00E+00 | 0.16  | 5.68E-01 | 9.30E-01 |
| <b>XLOC_013461</b> | -0.22 | 7.16E-01 | 1.00E+00 | -0.45 | 5.69E-01 | 9.30E-01 |
| <b>SCNM1</b>       | -0.17 | 3.76E-01 | 1.00E+00 | 0.14  | 5.69E-01 | 9.30E-01 |
| <b>S100A12</b>     | -1.10 | 6.79E-01 | 1.00E+00 | 1.79  | 5.69E-01 | 9.30E-01 |
| <b>CHD4</b>        | -0.06 | 8.46E-01 | 1.00E+00 | -0.18 | 5.69E-01 | 9.30E-01 |
| <b>HOXC8</b>       | 0.09  | 7.93E-01 | 1.00E+00 | 0.22  | 5.69E-01 | 9.30E-01 |
| <b>SGCB</b>        | 0.48  | 1.50E-01 | 1.00E+00 | -0.18 | 5.69E-01 | 9.30E-01 |
| <b>PARBPB</b>      | 0.62  | 2.92E-01 | 1.00E+00 | -0.18 | 5.69E-01 | 9.30E-01 |
| <b>FUK</b>         | -0.12 | 5.35E-01 | 1.00E+00 | 0.28  | 5.69E-01 | 9.30E-01 |
| <b>AC246817.2</b>  | 0.57  | 3.98E-01 | 1.00E+00 | -0.38 | 5.69E-01 | 9.30E-01 |
| <b>ZNF624</b>      | -0.13 | 7.12E-01 | 1.00E+00 | 0.17  | 5.69E-01 | 9.30E-01 |
| <b>AC091982.1</b>  | 0.54  | 6.11E-01 | 1.00E+00 | 0.60  | 5.69E-01 | 9.30E-01 |
| <b>IPO11</b>       | 0.03  | 8.97E-01 | 1.00E+00 | 0.16  | 5.69E-01 | 9.30E-01 |
| <b>IRAK1</b>       | -0.11 | 5.50E-01 | 1.00E+00 | 0.33  | 5.69E-01 | 9.30E-01 |
| <b>AP001528.2</b>  | 0.92  | 3.67E-01 | 1.00E+00 | -0.46 | 5.69E-01 | 9.30E-01 |
| <b>AC006566.1</b>  | -0.64 | 8.49E-01 | 1.00E+00 | -0.62 | 5.69E-01 | 9.30E-01 |
| <b>TRBV28</b>      | -0.03 | 9.80E-01 | 1.00E+00 | -0.75 | 5.69E-01 | 9.30E-01 |
| <b>MIR570</b>      | -1.50 | 6.52E-01 | 1.00E+00 | -0.49 | 5.69E-01 | 9.30E-01 |
| <b>DNAJC30</b>     | 0.02  | 9.55E-01 | 1.00E+00 | 0.12  | 5.69E-01 | 9.30E-01 |
| <b>HCAR1</b>       | 1.03  | 3.96E-01 | 1.00E+00 | 0.51  | 5.69E-01 | 9.30E-01 |
| <b>ANKRD23</b>     | -0.26 | 8.36E-01 | 1.00E+00 | 0.52  | 5.69E-01 | 9.30E-01 |
| <b>ZNHIT1</b>      | -0.08 | 5.92E-01 | 1.00E+00 | 0.11  | 5.69E-01 | 9.30E-01 |
| <b>IRF8</b>        | -0.01 | 9.88E-01 | 1.00E+00 | 0.37  | 5.69E-01 | 9.30E-01 |
| <b>RAPH1</b>       | -0.23 | 4.67E-01 | 1.00E+00 | 0.30  | 5.69E-01 | 9.30E-01 |
| <b>PTCH2</b>       | 0.01  | 9.92E-01 | 1.00E+00 | 0.43  | 5.70E-01 | 9.30E-01 |
| <b>IGKV1-8</b>     | 1.23  | 6.58E-01 | 1.00E+00 | 1.82  | 5.70E-01 | 9.30E-01 |
| <b>ASB3</b>        | -1.28 | 2.45E-01 | 1.00E+00 | -0.33 | 5.70E-01 | 9.30E-01 |
| <b>PRAME</b>       | 1.60  | 6.32E-01 | 1.00E+00 | 0.95  | 5.70E-01 | 9.30E-01 |

|                   |       |          |          |       |          |          |
|-------------------|-------|----------|----------|-------|----------|----------|
| <b>SLC25A44</b>   | 0.08  | 6.61E-01 | 1.00E+00 | 0.13  | 5.70E-01 | 9.30E-01 |
| <b>AC244033.2</b> | -0.02 | 9.75E-01 | 1.00E+00 | 0.42  | 5.70E-01 | 9.30E-01 |
| <b>AC073410.1</b> | -1.63 | 3.42E-01 | 1.00E+00 | 0.73  | 5.70E-01 | 9.30E-01 |
| <b>HEATR5A</b>    | 0.44  | 1.96E-01 | 1.00E+00 | -0.18 | 5.70E-01 | 9.30E-01 |
| <b>AC015911.7</b> | 0.28  | 7.89E-01 | 1.00E+00 | 1.80  | 5.70E-01 | 9.30E-01 |
| <b>G33445</b>     | 0.23  | 5.27E-01 | 1.00E+00 | 0.29  | 5.70E-01 | 9.30E-01 |
| <b>SERPINA11</b>  | -2.84 | 7.81E-03 | 5.43E-01 | -0.64 | 5.70E-01 | 9.30E-01 |
| <b>TNPO1</b>      | 0.33  | 1.31E-01 | 1.00E+00 | 0.13  | 5.70E-01 | 9.30E-01 |
| <b>TMED8</b>      | 0.15  | 5.32E-01 | 1.00E+00 | 0.19  | 5.70E-01 | 9.30E-01 |
| <b>ZNF222</b>     | -0.28 | 5.34E-01 | 1.00E+00 | 0.32  | 5.70E-01 | 9.30E-01 |
| <b>BIVM</b>       | 0.41  | 2.85E-01 | 1.00E+00 | -0.17 | 5.70E-01 | 9.30E-01 |
| <b>LHFPL1</b>     | 0.38  | 7.75E-01 | 1.00E+00 | 0.72  | 5.70E-01 | 9.30E-01 |
| <b>LATS1</b>      | -0.06 | 7.76E-01 | 1.00E+00 | -0.18 | 5.70E-01 | 9.30E-01 |
| <b>FRMD7</b>      | -1.17 | 2.36E-01 | 1.00E+00 | -1.49 | 5.70E-01 | 9.30E-01 |
| <b>PHC1P1</b>     | -0.79 | 7.98E-02 | 1.00E+00 | 0.55  | 5.70E-01 | 9.30E-01 |
| <b>AKAP10</b>     | 0.16  | 3.45E-01 | 1.00E+00 | -0.21 | 5.70E-01 | 9.30E-01 |
| <b>MORF4L1</b>    | 0.24  | 2.85E-01 | 1.00E+00 | -0.12 | 5.70E-01 | 9.30E-01 |
| <b>ICMT</b>       | -0.16 | 2.88E-01 | 1.00E+00 | 0.16  | 5.71E-01 | 9.30E-01 |
| <b>IQGAP2</b>     | 0.20  | 7.36E-01 | 1.00E+00 | 0.32  | 5.71E-01 | 9.30E-01 |
| <b>AC007342.5</b> | -1.04 | 4.29E-01 | 1.00E+00 | 0.54  | 5.71E-01 | 9.30E-01 |
| <b>CD81-AS1</b>   | -0.18 | 8.47E-01 | 1.00E+00 | -0.73 | 5.71E-01 | 9.30E-01 |
| <b>AC004112.1</b> | -1.13 | 4.95E-01 | 1.00E+00 | -0.57 | 5.71E-01 | 9.30E-01 |
| <b>CDK7</b>       | 0.16  | 5.51E-01 | 1.00E+00 | -0.20 | 5.71E-01 | 9.30E-01 |
| <b>AC022034.1</b> | 0.15  | 7.66E-01 | 1.00E+00 | -0.37 | 5.71E-01 | 9.30E-01 |
| <b>NBEAL1</b>     | 0.19  | 5.01E-01 | 1.00E+00 | -0.17 | 5.71E-01 | 9.30E-01 |
| <b>AC122713.2</b> | 1.06  | 5.82E-01 | 1.00E+00 | 0.83  | 5.71E-01 | 9.30E-01 |
| <b>PRKXP1</b>     | -0.99 | 3.12E-01 | 1.00E+00 | -0.66 | 5.71E-01 | 9.30E-01 |
| <b>AC023794.2</b> | 0.50  | 7.97E-01 | 1.00E+00 | -0.58 | 5.71E-01 | 9.30E-01 |
| <b>RNF126</b>     | -0.31 | 3.78E-01 | 1.00E+00 | -0.18 | 5.71E-01 | 9.30E-01 |
| <b>UBE2D1</b>     | 0.13  | 7.00E-01 | 1.00E+00 | -0.19 | 5.71E-01 | 9.30E-01 |
| <b>OR7E39P</b>    | 0.29  | 7.59E-01 | 1.00E+00 | -0.49 | 5.71E-01 | 9.30E-01 |
| <b>PCDHGA9</b>    | -0.19 | 6.22E-01 | 1.00E+00 | -0.39 | 5.71E-01 | 9.30E-01 |

|            |       |          |          |       |          |          |
|------------|-------|----------|----------|-------|----------|----------|
| PLEKHH1    | -0.48 | 2.43E-01 | 1.00E+00 | -0.28 | 5.71E-01 | 9.30E-01 |
| NUP155     | -0.10 | 6.43E-01 | 1.00E+00 | -0.11 | 5.71E-01 | 9.30E-01 |
| PIGA       | -0.08 | 8.20E-01 | 1.00E+00 | 0.19  | 5.71E-01 | 9.30E-01 |
| MESP1      | 2.31  | 1.52E-01 | 1.00E+00 | -0.45 | 5.71E-01 | 9.30E-01 |
| ACVR2B-AS1 | -0.35 | 5.36E-01 | 1.00E+00 | 0.44  | 5.71E-01 | 9.30E-01 |
| LTBP4      | 0.14  | 6.90E-01 | 1.00E+00 | -0.31 | 5.71E-01 | 9.30E-01 |
| AL356273.3 | 0.59  | 1.84E-01 | 1.00E+00 | 0.48  | 5.71E-01 | 9.30E-01 |
| AC005736.1 | 0.66  | 3.17E-01 | 1.00E+00 | -0.40 | 5.71E-01 | 9.30E-01 |
| RNF10      | -0.04 | 7.65E-01 | 1.00E+00 | -0.19 | 5.71E-01 | 9.30E-01 |
| AC124242.1 | -0.53 | 4.07E-01 | 1.00E+00 | -0.34 | 5.71E-01 | 9.30E-01 |
| FUCA2      | 0.01  | 9.78E-01 | 1.00E+00 | 0.20  | 5.71E-01 | 9.30E-01 |
| EID2B      | 0.12  | 8.34E-01 | 1.00E+00 | 0.29  | 5.72E-01 | 9.30E-01 |
| ZNF366     | 0.18  | 7.49E-01 | 1.00E+00 | -0.36 | 5.72E-01 | 9.30E-01 |
| ADM5       | -0.77 | 1.95E-02 | 8.75E-01 | 0.30  | 5.72E-01 | 9.30E-01 |
| NR5A2      | 0.46  | 3.20E-01 | 1.00E+00 | 0.29  | 5.72E-01 | 9.30E-01 |
| SAXO2      | 0.32  | 5.67E-01 | 1.00E+00 | 0.30  | 5.72E-01 | 9.30E-01 |
| OR7E91P    | 0.57  | 2.37E-01 | 1.00E+00 | -0.37 | 5.72E-01 | 9.30E-01 |
| LINC01388  | -2.44 | 2.72E-01 | 1.00E+00 | -1.04 | 5.72E-01 | 9.30E-01 |
| ANGPT4     | 0.40  | 4.87E-01 | 1.00E+00 | -0.49 | 5.72E-01 | 9.30E-01 |
| AC012074.1 | -1.34 | 1.85E-01 | 1.00E+00 | -0.71 | 5.72E-01 | 9.30E-01 |
| 7-Mar      | -0.04 | 8.77E-01 | 1.00E+00 | -0.12 | 5.72E-01 | 9.30E-01 |
| AL583785.1 | -0.71 | 4.23E-01 | 1.00E+00 | 0.32  | 5.72E-01 | 9.30E-01 |
| PTPN18     | -0.08 | 7.99E-01 | 1.00E+00 | 0.33  | 5.72E-01 | 9.30E-01 |
| MIR4442    | -0.63 | 3.57E-01 | 1.00E+00 | 0.94  | 5.72E-01 | 9.30E-01 |
| PPP2R5A    | 0.30  | 2.18E-01 | 1.00E+00 | -0.24 | 5.72E-01 | 9.30E-01 |
| RPP40      | -0.43 | 2.44E-01 | 1.00E+00 | -0.20 | 5.72E-01 | 9.30E-01 |
| SIX2       | 0.56  | 4.60E-01 | 1.00E+00 | -0.66 | 5.72E-01 | 9.30E-01 |
| KLC1       | -0.13 | 6.37E-01 | 1.00E+00 | 0.19  | 5.72E-01 | 9.30E-01 |
| LINC01914  | -0.37 | 9.12E-01 | 1.00E+00 | 0.50  | 5.72E-01 | 9.31E-01 |
| BACE2      | -0.05 | 8.40E-01 | 1.00E+00 | 0.28  | 5.72E-01 | 9.31E-01 |
| LINC01290  | 0.50  | 7.36E-01 | 1.00E+00 | 0.52  | 5.72E-01 | 9.31E-01 |
| CDCA7      | -0.37 | 2.72E-01 | 1.00E+00 | -0.22 | 5.73E-01 | 9.31E-01 |

|                   |       |          |          |       |          |          |
|-------------------|-------|----------|----------|-------|----------|----------|
| <b>AC125494.2</b> | -0.80 | 3.79E-01 | 1.00E+00 | -0.65 | 5.73E-01 | 9.31E-01 |
| <b>NUMA1</b>      | -0.11 | 6.49E-01 | 1.00E+00 | 0.31  | 5.73E-01 | 9.31E-01 |
| <b>SELENOH</b>    | -0.16 | 4.85E-01 | 1.00E+00 | 0.23  | 5.73E-01 | 9.31E-01 |
| <b>GNG5</b>       | -0.33 | 4.45E-01 | 1.00E+00 | 0.39  | 5.73E-01 | 9.31E-01 |
| <b>FAM199X</b>    | 0.19  | 4.05E-01 | 1.00E+00 | -0.18 | 5.73E-01 | 9.31E-01 |
| <b>VT11B</b>      | 0.39  | 7.48E-02 | 1.00E+00 | -0.18 | 5.73E-01 | 9.31E-01 |
| <b>AC012368.1</b> | 0.07  | 8.95E-01 | 1.00E+00 | 0.44  | 5.73E-01 | 9.31E-01 |
| <b>HYLS1</b>      | 0.00  | 9.95E-01 | 1.00E+00 | 0.14  | 5.73E-01 | 9.31E-01 |
| <b>AC016027.1</b> | 0.26  | 8.16E-01 | 1.00E+00 | -0.28 | 5.73E-01 | 9.31E-01 |
| <b>G40865</b>     | -0.53 | 5.03E-01 | 1.00E+00 | 0.31  | 5.73E-01 | 9.31E-01 |
| <b>SPDYE3</b>     | -0.45 | 1.61E-01 | 1.00E+00 | -0.20 | 5.73E-01 | 9.31E-01 |
| <b>GADD45A</b>    | -0.02 | 9.57E-01 | 1.00E+00 | -0.26 | 5.73E-01 | 9.31E-01 |
| <b>HAUS4</b>      | 0.19  | 4.86E-01 | 1.00E+00 | 0.20  | 5.73E-01 | 9.31E-01 |
| <b>IRF1</b>       | -1.01 | 8.77E-04 | 1.50E-01 | 0.33  | 5.73E-01 | 9.31E-01 |
| <b>MAVS</b>       | 0.08  | 7.94E-01 | 1.00E+00 | 0.21  | 5.73E-01 | 9.31E-01 |
| <b>MYO18B</b>     | -0.71 | 5.17E-01 | 1.00E+00 | -0.68 | 5.73E-01 | 9.31E-01 |
| <b>GNAI2</b>      | 0.02  | 9.42E-01 | 1.00E+00 | 0.33  | 5.73E-01 | 9.31E-01 |
| <b>MIPEPP3</b>    | -1.07 | 2.30E-02 | 9.12E-01 | 0.16  | 5.73E-01 | 9.31E-01 |
| <b>CA14</b>       | 0.20  | 6.70E-01 | 1.00E+00 | 0.28  | 5.73E-01 | 9.31E-01 |
| <b>ASCC1</b>      | 0.00  | 9.82E-01 | 1.00E+00 | -0.12 | 5.73E-01 | 9.31E-01 |
| <b>AL139011.1</b> | -2.90 | 7.77E-02 | 1.00E+00 | -0.38 | 5.73E-01 | 9.31E-01 |
| <b>HTR1F</b>      | 0.23  | 7.62E-01 | 1.00E+00 | 0.52  | 5.74E-01 | 9.31E-01 |
| <b>AC004908.1</b> | 1.32  | 3.73E-01 | 1.00E+00 | -0.67 | 5.74E-01 | 9.31E-01 |
| <b>PLP1</b>       | -0.87 | 5.99E-02 | 1.00E+00 | -0.25 | 5.74E-01 | 9.31E-01 |
| <b>ART4</b>       | 0.27  | 6.93E-01 | 1.00E+00 | 0.47  | 5.74E-01 | 9.31E-01 |
| <b>TIGD4</b>      | -0.05 | 9.63E-01 | 1.00E+00 | 0.55  | 5.74E-01 | 9.31E-01 |
| <b>PEX16</b>      | -0.26 | 2.87E-01 | 1.00E+00 | 0.11  | 5.74E-01 | 9.31E-01 |
| <b>TRIP13</b>     | -0.06 | 8.74E-01 | 1.00E+00 | 0.24  | 5.74E-01 | 9.31E-01 |
| <b>QSER1</b>      | 0.00  | 9.98E-01 | 1.00E+00 | 0.22  | 5.74E-01 | 9.31E-01 |
| <b>ARL8B</b>      | 0.13  | 5.45E-01 | 1.00E+00 | -0.10 | 5.74E-01 | 9.31E-01 |
| <b>AC022364.1</b> | 0.00  | 9.96E-01 | 1.00E+00 | -0.27 | 5.74E-01 | 9.31E-01 |
| <b>NPPA</b>       | 0.90  | 7.96E-01 | 1.00E+00 | 1.08  | 5.74E-01 | 9.31E-01 |

|                   |       |          |          |       |          |          |
|-------------------|-------|----------|----------|-------|----------|----------|
| <b>TIMM29</b>     | 0.03  | 8.92E-01 | 1.00E+00 | -0.20 | 5.74E-01 | 9.31E-01 |
| <b>IL17D</b>      | 0.64  | 2.12E-01 | 1.00E+00 | -0.29 | 5.74E-01 | 9.31E-01 |
| <b>AC008894.3</b> | 0.67  | 6.43E-01 | 1.00E+00 | 0.69  | 5.74E-01 | 9.31E-01 |
| <b>AL158212.3</b> | 0.54  | 3.51E-01 | 1.00E+00 | -0.38 | 5.74E-01 | 9.31E-01 |
| <b>AC009090.4</b> | -1.20 | 6.11E-01 | 1.00E+00 | -0.60 | 5.74E-01 | 9.31E-01 |
| <b>SCEL</b>       | 0.08  | 8.95E-01 | 1.00E+00 | -0.39 | 5.74E-01 | 9.31E-01 |
| <b>AC104237.3</b> | -0.81 | 4.72E-01 | 1.00E+00 | -0.57 | 5.74E-01 | 9.31E-01 |
| <b>HDAC4</b>      | 0.34  | 2.89E-01 | 1.00E+00 | 0.27  | 5.74E-01 | 9.31E-01 |
| <b>ETAA1</b>      | -0.32 | 1.49E-01 | 1.00E+00 | -0.17 | 5.74E-01 | 9.31E-01 |
| <b>BOLA2B</b>     | -0.50 | 4.00E-01 | 1.00E+00 | 0.16  | 5.74E-01 | 9.31E-01 |
| <b>AP000866.6</b> | 0.63  | 8.26E-01 | 1.00E+00 | 0.53  | 5.74E-01 | 9.31E-01 |
| <b>GRB7</b>       | 0.25  | 3.43E-01 | 1.00E+00 | 0.24  | 5.75E-01 | 9.31E-01 |
| <b>C16orf86</b>   | 0.88  | 4.03E-02 | 1.00E+00 | 0.37  | 5.75E-01 | 9.31E-01 |
| <b>METTL3</b>     | 0.30  | 2.30E-01 | 1.00E+00 | -0.14 | 5.75E-01 | 9.31E-01 |
| <b>MINPP1</b>     | 0.33  | 3.15E-01 | 1.00E+00 | -0.13 | 5.75E-01 | 9.31E-01 |
| <b>CD63</b>       | 0.25  | 4.99E-01 | 1.00E+00 | 0.18  | 5.75E-01 | 9.31E-01 |
| <b>NR6A1</b>      | -0.51 | 2.40E-01 | 1.00E+00 | -0.27 | 5.75E-01 | 9.31E-01 |
| <b>HOXB6</b>      | 0.02  | 9.79E-01 | 1.00E+00 | 0.29  | 5.75E-01 | 9.31E-01 |
| <b>ZNF252P</b>    | 0.29  | 3.19E-01 | 1.00E+00 | 0.11  | 5.75E-01 | 9.31E-01 |
| <b>G18962</b>     | -2.99 | 2.15E-01 | 1.00E+00 | 0.91  | 5.75E-01 | 9.31E-01 |
| <b>LNCTAM34A</b>  | -0.38 | 4.05E-01 | 1.00E+00 | 0.30  | 5.75E-01 | 9.31E-01 |
| <b>CATSPER3</b>   | 0.42  | 6.82E-01 | 1.00E+00 | 0.65  | 5.75E-01 | 9.31E-01 |
| <b>AC011405.1</b> | -1.24 | 3.54E-01 | 1.00E+00 | -0.55 | 5.75E-01 | 9.31E-01 |
| <b>AC097639.1</b> | -0.26 | 5.58E-01 | 1.00E+00 | 0.26  | 5.75E-01 | 9.31E-01 |
| <b>AC100812.1</b> | 1.04  | 7.65E-01 | 1.00E+00 | -0.86 | 5.75E-01 | 9.31E-01 |
| <b>AC048344.4</b> | -1.99 | 5.63E-01 | 1.00E+00 | 0.75  | 5.75E-01 | 9.31E-01 |
| <b>LRRC47</b>     | -0.11 | 6.08E-01 | 1.00E+00 | -0.20 | 5.75E-01 | 9.31E-01 |
| <b>C19orf57</b>   | -0.34 | 3.04E-01 | 1.00E+00 | -0.30 | 5.75E-01 | 9.31E-01 |
| <b>PFDN1</b>      | -0.07 | 7.25E-01 | 1.00E+00 | -0.14 | 5.75E-01 | 9.31E-01 |
| <b>AP003119.3</b> | 0.88  | 1.74E-02 | 8.33E-01 | 0.37  | 5.75E-01 | 9.31E-01 |
| <b>AC007342.8</b> | -0.19 | 9.25E-01 | 1.00E+00 | -0.83 | 5.75E-01 | 9.31E-01 |
| <b>PLL</b>        | 0.07  | 8.62E-01 | 1.00E+00 | -0.27 | 5.75E-01 | 9.31E-01 |

|             |       |          |          |       |          |          |
|-------------|-------|----------|----------|-------|----------|----------|
| MAPK15      | 0.40  | 3.32E-01 | 1.00E+00 | 0.44  | 5.75E-01 | 9.31E-01 |
| SPDYE6      | -0.49 | 6.34E-01 | 1.00E+00 | 0.37  | 5.75E-01 | 9.31E-01 |
| TMEM253     | 4.23  | 5.86E-02 | 1.00E+00 | -0.49 | 5.75E-01 | 9.31E-01 |
| AL035071.1  | 0.22  | 5.96E-01 | 1.00E+00 | -0.32 | 5.75E-01 | 9.31E-01 |
| MFSD4B      | -0.20 | 4.66E-01 | 1.00E+00 | 0.21  | 5.75E-01 | 9.31E-01 |
| GPHA2       | -2.35 | 4.34E-01 | 1.00E+00 | -0.89 | 5.75E-01 | 9.31E-01 |
| CFAP298     | 0.00  | 9.92E-01 | 1.00E+00 | -0.28 | 5.75E-01 | 9.31E-01 |
| TRARG1      | 4.97  | 2.67E-03 | 2.68E-01 | 0.56  | 5.75E-01 | 9.31E-01 |
| C15orf65    | -0.01 | 9.82E-01 | 1.00E+00 | -0.23 | 5.76E-01 | 9.31E-01 |
| COPG2       | -0.44 | 1.21E-01 | 1.00E+00 | 0.21  | 5.76E-01 | 9.31E-01 |
| ANGEL1      | 0.14  | 7.21E-01 | 1.00E+00 | 0.25  | 5.76E-01 | 9.31E-01 |
| YPEL1       | -0.52 | 2.72E-01 | 1.00E+00 | -0.48 | 5.76E-01 | 9.31E-01 |
| XLOC_007992 | -0.34 | 9.03E-01 | 1.00E+00 | -0.33 | 5.76E-01 | 9.31E-01 |
| C12orf57    | 0.07  | 7.80E-01 | 1.00E+00 | -0.25 | 5.76E-01 | 9.31E-01 |
| LINC02533   | NA    | NA       | NA       | -1.80 | 5.76E-01 | 9.31E-01 |
| EMC2        | 0.24  | 2.18E-01 | 1.00E+00 | -0.12 | 5.76E-01 | 9.31E-01 |
| AP003068.4  | -0.57 | 5.23E-01 | 1.00E+00 | -0.42 | 5.76E-01 | 9.31E-01 |
| ANXA9       | -0.16 | 7.68E-01 | 1.00E+00 | 0.32  | 5.76E-01 | 9.31E-01 |
| AC012557.1  | 1.84  | 8.58E-02 | 1.00E+00 | 0.42  | 5.76E-01 | 9.31E-01 |
| INTS4P1     | 1.26  | 1.20E-01 | 1.00E+00 | -0.47 | 5.76E-01 | 9.31E-01 |
| AC004982.1  | 1.04  | 3.60E-01 | 1.00E+00 | 0.49  | 5.76E-01 | 9.31E-01 |
| CD177       | -2.23 | 8.49E-02 | 1.00E+00 | 1.76  | 5.76E-01 | 9.31E-01 |
| OTUB1       | -0.24 | 2.93E-01 | 1.00E+00 | 0.12  | 5.76E-01 | 9.31E-01 |
| TMEM150B    | 0.43  | 7.37E-01 | 1.00E+00 | 1.77  | 5.76E-01 | 9.31E-01 |
| MT-TP       | 0.05  | 9.30E-01 | 1.00E+00 | 0.22  | 5.76E-01 | 9.32E-01 |
| ZFAND2A     | 0.04  | 8.95E-01 | 1.00E+00 | 0.17  | 5.76E-01 | 9.32E-01 |
| CAVIN4      | -0.10 | 9.33E-01 | 1.00E+00 | -0.67 | 5.76E-01 | 9.32E-01 |
| ZNF341-AS1  | 1.63  | 2.10E-01 | 1.00E+00 | 0.39  | 5.76E-01 | 9.32E-01 |
| AC048341.2  | -0.36 | 9.16E-01 | 1.00E+00 | -0.77 | 5.77E-01 | 9.32E-01 |
| AC027307.3  | -1.19 | 2.10E-03 | 2.39E-01 | 0.31  | 5.77E-01 | 9.32E-01 |
| MATN3       | 0.12  | 8.50E-01 | 1.00E+00 | -1.24 | 5.77E-01 | 9.32E-01 |
| RN7SL68P    | -1.32 | 6.20E-01 | 1.00E+00 | 0.70  | 5.77E-01 | 9.32E-01 |

|                    |       |          |          |       |          |          |
|--------------------|-------|----------|----------|-------|----------|----------|
| <b>RAPGEF5</b>     | -0.04 | 8.95E-01 | 1.00E+00 | 0.25  | 5.77E-01 | 9.32E-01 |
| <b>GFAP</b>        | -2.36 | 1.57E-01 | 1.00E+00 | -0.54 | 5.77E-01 | 9.32E-01 |
| <b>C1orf140</b>    | -0.01 | 9.93E-01 | 1.00E+00 | -0.57 | 5.77E-01 | 9.32E-01 |
| <b>XLOC_008957</b> | -2.61 | 1.63E-01 | 1.00E+00 | -0.65 | 5.77E-01 | 9.32E-01 |
| <b>AC004834.1</b>  | -1.80 | 2.78E-01 | 1.00E+00 | 0.59  | 5.77E-01 | 9.32E-01 |
| <b>AANAT</b>       | -0.13 | 9.26E-01 | 1.00E+00 | 0.80  | 5.77E-01 | 9.32E-01 |
| <b>KCTD16</b>      | 0.62  | 7.02E-01 | 1.00E+00 | 1.42  | 5.77E-01 | 9.32E-01 |
| <b>NRG4</b>        | -0.74 | 1.02E-01 | 1.00E+00 | -0.43 | 5.77E-01 | 9.32E-01 |
| <b>STK24</b>       | 0.00  | 9.88E-01 | 1.00E+00 | -0.29 | 5.77E-01 | 9.32E-01 |
| <b>PGM5</b>        | 0.18  | 7.27E-01 | 1.00E+00 | -0.37 | 5.77E-01 | 9.32E-01 |
| <b>LCE4A</b>       | 0.20  | 7.90E-01 | 1.00E+00 | 0.38  | 5.77E-01 | 9.32E-01 |
| <b>AC008065.1</b>  | NA    | NA       | NA       | 0.52  | 5.77E-01 | 9.32E-01 |
| <b>SLC45A2</b>     | -0.10 | 8.99E-01 | 1.00E+00 | 0.47  | 5.77E-01 | 9.32E-01 |
| <b>MYL12BP1</b>    | -2.80 | 5.63E-02 | 1.00E+00 | -0.30 | 5.78E-01 | 9.32E-01 |
| <b>AC002044.1</b>  | -1.71 | 6.18E-01 | 1.00E+00 | 0.43  | 5.78E-01 | 9.32E-01 |
| <b>CA12</b>        | -0.17 | 5.57E-01 | 1.00E+00 | 0.21  | 5.78E-01 | 9.33E-01 |
| <b>MRTFB</b>       | -0.10 | 6.61E-01 | 1.00E+00 | 0.18  | 5.78E-01 | 9.33E-01 |
| <b>TNFRSF4</b>     | -0.17 | 7.99E-01 | 1.00E+00 | 0.55  | 5.78E-01 | 9.33E-01 |
| <b>LGALS1</b>      | 0.38  | 4.18E-01 | 1.00E+00 | 0.23  | 5.78E-01 | 9.33E-01 |
| <b>AC108058.1</b>  | -2.69 | 1.44E-01 | 1.00E+00 | 0.60  | 5.78E-01 | 9.33E-01 |
| <b>FBXO6</b>       | -0.13 | 7.37E-01 | 1.00E+00 | 0.17  | 5.78E-01 | 9.33E-01 |
| <b>STBD1</b>       | 0.45  | 4.58E-01 | 1.00E+00 | -0.38 | 5.78E-01 | 9.33E-01 |
| <b>SLC35B2</b>     | -0.15 | 5.42E-01 | 1.00E+00 | 0.13  | 5.78E-01 | 9.33E-01 |
| <b>NATD1</b>       | 0.33  | 3.52E-01 | 1.00E+00 | 0.36  | 5.78E-01 | 9.33E-01 |
| <b>AC091182.1</b>  | -1.01 | 1.64E-01 | 1.00E+00 | 1.18  | 5.78E-01 | 9.33E-01 |
| <b>NECTIN3</b>     | 0.13  | 6.70E-01 | 1.00E+00 | 0.33  | 5.79E-01 | 9.33E-01 |
| <b>HIST1H3A</b>    | 1.31  | 4.37E-01 | 1.00E+00 | 0.57  | 5.79E-01 | 9.33E-01 |
| <b>ARHGAP29</b>    | 0.41  | 2.19E-01 | 1.00E+00 | -0.18 | 5.79E-01 | 9.33E-01 |
| <b>MRPL38</b>      | -0.15 | 8.64E-01 | 1.00E+00 | 0.37  | 5.79E-01 | 9.33E-01 |
| <b>PSG7</b>        | 0.18  | 8.72E-01 | 1.00E+00 | -0.65 | 5.79E-01 | 9.33E-01 |
| <b>RPL23AP87</b>   | 1.20  | 2.39E-01 | 1.00E+00 | -0.38 | 5.79E-01 | 9.33E-01 |
| <b>TXNL1</b>       | 0.11  | 4.88E-01 | 1.00E+00 | -0.13 | 5.79E-01 | 9.33E-01 |



|                    |       |          |          |       |          |          |
|--------------------|-------|----------|----------|-------|----------|----------|
| <b>G28648</b>      | 0.52  | 3.85E-01 | 1.00E+00 | -0.33 | 5.79E-01 | 9.33E-01 |
| <b>TLL5</b>        | -0.23 | 2.73E-01 | 1.00E+00 | -0.19 | 5.79E-01 | 9.33E-01 |
| <b>PPP1R10</b>     | -0.22 | 4.32E-01 | 1.00E+00 | -0.16 | 5.79E-01 | 9.33E-01 |
| <b>GPR137B</b>     | 0.22  | 4.17E-01 | 1.00E+00 | -0.27 | 5.79E-01 | 9.33E-01 |
| <b>TDGP1</b>       | -0.70 | 8.41E-01 | 1.00E+00 | -0.40 | 5.79E-01 | 9.33E-01 |
| <b>PRKN</b>        | -0.09 | 7.56E-01 | 1.00E+00 | -0.25 | 5.79E-01 | 9.33E-01 |
| <b>CNOT3</b>       | -0.26 | 3.15E-01 | 1.00E+00 | 0.33  | 5.79E-01 | 9.33E-01 |
| <b>AC007228.1</b>  | 1.92  | 3.73E-01 | 1.00E+00 | 0.33  | 5.79E-01 | 9.34E-01 |
| <b>ABHD11</b>      | -0.03 | 8.94E-01 | 1.00E+00 | -0.15 | 5.79E-01 | 9.34E-01 |
| <b>RBMS2P1</b>     | -1.07 | 2.46E-01 | 1.00E+00 | -0.27 | 5.79E-01 | 9.34E-01 |
| <b>LLGL2</b>       | -0.31 | 3.03E-01 | 1.00E+00 | -0.29 | 5.80E-01 | 9.34E-01 |
| <b>HMGB1P20</b>    | NA    | NA       | NA       | -0.36 | 5.80E-01 | 9.34E-01 |
| <b>GNA11</b>       | -0.03 | 9.00E-01 | 1.00E+00 | 0.29  | 5.80E-01 | 9.34E-01 |
| <b>SYNGR2</b>      | -0.25 | 3.32E-01 | 1.00E+00 | 0.13  | 5.80E-01 | 9.34E-01 |
| <b>SPATA22</b>     | -1.20 | 7.05E-01 | 1.00E+00 | -0.50 | 5.80E-01 | 9.34E-01 |
| <b>ACBD3-AS1</b>   | 1.21  | 6.41E-02 | 1.00E+00 | -0.44 | 5.80E-01 | 9.34E-01 |
| <b>UBR5</b>        | 0.05  | 8.21E-01 | 1.00E+00 | 0.25  | 5.80E-01 | 9.34E-01 |
| <b>XLOC_004363</b> | -0.81 | 6.17E-01 | 1.00E+00 | -0.55 | 5.80E-01 | 9.34E-01 |
| <b>FLNB</b>        | -0.23 | 4.00E-01 | 1.00E+00 | 0.26  | 5.80E-01 | 9.34E-01 |
| <b>KIAA1328</b>    | -0.29 | 1.96E-01 | 1.00E+00 | -0.18 | 5.80E-01 | 9.34E-01 |
| <b>SMPDL3A</b>     | 0.36  | 3.01E-01 | 1.00E+00 | -0.26 | 5.80E-01 | 9.34E-01 |
| <b>SEMA3G</b>      | 0.89  | 1.51E-01 | 1.00E+00 | 0.42  | 5.80E-01 | 9.34E-01 |
| <b>ASTL</b>        | -0.68 | 2.95E-01 | 1.00E+00 | -0.60 | 5.80E-01 | 9.34E-01 |
| <b>FBXO34</b>      | -0.04 | 8.47E-01 | 1.00E+00 | -0.10 | 5.80E-01 | 9.34E-01 |
| <b>RLF</b>         | -0.04 | 8.55E-01 | 1.00E+00 | -0.17 | 5.80E-01 | 9.34E-01 |
| <b>ZMYM5</b>       | 0.16  | 4.94E-01 | 1.00E+00 | -0.17 | 5.80E-01 | 9.34E-01 |
| <b>AC083801.2</b>  | -0.77 | 5.55E-01 | 1.00E+00 | 0.67  | 5.80E-01 | 9.34E-01 |
| <b>PPP5C</b>       | -0.11 | 5.69E-01 | 1.00E+00 | 0.18  | 5.80E-01 | 9.34E-01 |
| <b>SLIT1</b>       | 0.51  | 5.93E-01 | 1.00E+00 | 0.75  | 5.80E-01 | 9.34E-01 |
| <b>LGALS7B</b>     | -0.82 | 9.42E-02 | 1.00E+00 | -0.37 | 5.81E-01 | 9.34E-01 |
| <b>AC025165.5</b>  | 0.58  | 3.94E-01 | 1.00E+00 | 0.25  | 5.81E-01 | 9.34E-01 |
| <b>TRAV22</b>      | 2.93  | 1.01E-01 | 1.00E+00 | 0.81  | 5.81E-01 | 9.34E-01 |

|             |       |          |          |       |          |          |
|-------------|-------|----------|----------|-------|----------|----------|
| LINGO4      | -1.29 | 6.53E-02 | 1.00E+00 | -0.52 | 5.81E-01 | 9.34E-01 |
| SNHG11      | 0.06  | 8.73E-01 | 1.00E+00 | 0.12  | 5.81E-01 | 9.34E-01 |
| AL138720.1  | 0.12  | 9.18E-01 | 1.00E+00 | 0.57  | 5.81E-01 | 9.34E-01 |
| NAT9        | -0.10 | 7.40E-01 | 1.00E+00 | 0.15  | 5.81E-01 | 9.34E-01 |
| XLOC_001333 | -0.19 | 6.26E-01 | 1.00E+00 | -0.44 | 5.81E-01 | 9.34E-01 |
| G31549      | 0.18  | 8.74E-01 | 1.00E+00 | 0.47  | 5.81E-01 | 9.34E-01 |
| FBXO32      | 0.29  | 5.04E-01 | 1.00E+00 | -0.15 | 5.81E-01 | 9.34E-01 |
| PPIL2       | -0.07 | 7.65E-01 | 1.00E+00 | 0.23  | 5.81E-01 | 9.34E-01 |
| RPL7P16     | -2.93 | 2.36E-01 | 1.00E+00 | 0.51  | 5.81E-01 | 9.34E-01 |
| TBK1        | 0.17  | 5.53E-01 | 1.00E+00 | 0.09  | 5.81E-01 | 9.34E-01 |
| NAGLU       | 0.19  | 6.15E-01 | 1.00E+00 | 0.36  | 5.81E-01 | 9.34E-01 |
| FAM111A-DT  | 0.46  | 9.49E-02 | 1.00E+00 | 0.14  | 5.81E-01 | 9.34E-01 |
| SUV39H2     | -0.02 | 9.64E-01 | 1.00E+00 | 0.16  | 5.81E-01 | 9.34E-01 |
| EIF3L       | -0.19 | 5.94E-01 | 1.00E+00 | 0.18  | 5.82E-01 | 9.35E-01 |
| SLC39A6     | -0.14 | 6.57E-01 | 1.00E+00 | 0.12  | 5.82E-01 | 9.35E-01 |
| AC097374.1  | 1.09  | 7.54E-01 | 1.00E+00 | -0.43 | 5.82E-01 | 9.35E-01 |
| BCORL1      | 0.12  | 7.27E-01 | 1.00E+00 | 0.36  | 5.82E-01 | 9.35E-01 |
| PSORS1C1    | 0.04  | 9.29E-01 | 1.00E+00 | -0.23 | 5.82E-01 | 9.35E-01 |
| AC008105.1  | -0.57 | 7.43E-01 | 1.00E+00 | -0.72 | 5.82E-01 | 9.35E-01 |
| TLK2P1      | -0.32 | 7.46E-01 | 1.00E+00 | -0.25 | 5.82E-01 | 9.35E-01 |
| RNF185      | 0.09  | 6.47E-01 | 1.00E+00 | 0.10  | 5.82E-01 | 9.35E-01 |
| DKC1        | -0.06 | 7.81E-01 | 1.00E+00 | 0.13  | 5.82E-01 | 9.35E-01 |
| BEND3P1     | 0.75  | 3.46E-01 | 1.00E+00 | 0.60  | 5.82E-01 | 9.35E-01 |
| FAM72A      | -0.32 | 6.10E-01 | 1.00E+00 | -0.16 | 5.82E-01 | 9.35E-01 |
| YTHDF2      | -0.06 | 7.61E-01 | 1.00E+00 | -0.11 | 5.82E-01 | 9.35E-01 |
| AP3S1       | 0.16  | 3.72E-01 | 1.00E+00 | -0.13 | 5.82E-01 | 9.35E-01 |
| KRTAP5-10   | -1.05 | 6.68E-01 | 1.00E+00 | 0.91  | 5.82E-01 | 9.35E-01 |
| PITX3       | -1.24 | 7.13E-01 | 1.00E+00 | 1.06  | 5.82E-01 | 9.35E-01 |
| PCDHGC3     | -0.24 | 3.36E-01 | 1.00E+00 | 0.33  | 5.82E-01 | 9.35E-01 |
| AP003469.4  | -0.07 | 8.82E-01 | 1.00E+00 | 0.32  | 5.82E-01 | 9.35E-01 |
| AC005288.1  | -0.09 | 7.59E-01 | 1.00E+00 | 0.19  | 5.82E-01 | 9.35E-01 |
| CDYL        | -0.10 | 6.56E-01 | 1.00E+00 | 0.13  | 5.82E-01 | 9.35E-01 |

|                   |       |          |          |       |          |          |
|-------------------|-------|----------|----------|-------|----------|----------|
| <b>AC060766.7</b> | -2.25 | 2.20E-01 | 1.00E+00 | 0.39  | 5.82E-01 | 9.35E-01 |
| <b>AL590491.2</b> | -0.62 | 5.65E-01 | 1.00E+00 | -0.55 | 5.82E-01 | 9.35E-01 |
| <b>AL355297.4</b> | -3.10 | 3.60E-01 | 1.00E+00 | -0.79 | 5.82E-01 | 9.35E-01 |
| <b>SPIRE1</b>     | -0.05 | 8.84E-01 | 1.00E+00 | 0.27  | 5.82E-01 | 9.35E-01 |
| <b>GPRC5B</b>     | 0.02  | 9.78E-01 | 1.00E+00 | -0.24 | 5.82E-01 | 9.35E-01 |
| <b>AC006449.2</b> | -0.11 | 8.55E-01 | 1.00E+00 | 0.33  | 5.82E-01 | 9.35E-01 |
| <b>LAMP3</b>      | -0.07 | 9.30E-01 | 1.00E+00 | 0.43  | 5.83E-01 | 9.35E-01 |
| <b>GALNT15</b>    | 1.55  | 3.09E-02 | 1.00E+00 | 0.37  | 5.83E-01 | 9.35E-01 |
| <b>IGLV5-52</b>   | 0.38  | 5.44E-01 | 1.00E+00 | 0.35  | 5.83E-01 | 9.35E-01 |
| <b>HOXD10</b>     | 0.16  | 7.06E-01 | 1.00E+00 | 0.51  | 5.83E-01 | 9.35E-01 |
| <b>DCBLD2</b>     | 0.12  | 5.88E-01 | 1.00E+00 | -0.14 | 5.83E-01 | 9.35E-01 |
| <b>DZIP1L</b>     | -0.27 | 4.85E-01 | 1.00E+00 | 0.29  | 5.83E-01 | 9.35E-01 |
| <b>G32319</b>     | -0.37 | 6.05E-01 | 1.00E+00 | 0.37  | 5.83E-01 | 9.35E-01 |
| <b>PTP4A2P2</b>   | 0.92  | 7.40E-01 | 1.00E+00 | 0.54  | 5.83E-01 | 9.35E-01 |
| <b>LRRIQ3</b>     | 0.78  | 3.70E-01 | 1.00E+00 | -0.30 | 5.83E-01 | 9.35E-01 |
| <b>TCEA2</b>      | -0.04 | 8.88E-01 | 1.00E+00 | -0.32 | 5.83E-01 | 9.35E-01 |
| <b>AL158166.1</b> | -2.67 | 1.48E-01 | 1.00E+00 | 0.95  | 5.83E-01 | 9.35E-01 |
| <b>CHRM3</b>      | 0.08  | 9.23E-01 | 1.00E+00 | -1.26 | 5.83E-01 | 9.35E-01 |
| <b>MED28</b>      | 0.35  | 8.82E-02 | 1.00E+00 | 0.12  | 5.83E-01 | 9.35E-01 |
| <b>AC092574.2</b> | -2.63 | 3.21E-01 | 1.00E+00 | -0.40 | 5.83E-01 | 9.35E-01 |
| <b>ZDHHC23</b>    | -0.20 | 6.98E-01 | 1.00E+00 | 0.35  | 5.83E-01 | 9.35E-01 |
| <b>REEP4</b>      | -0.05 | 9.06E-01 | 1.00E+00 | 0.19  | 5.83E-01 | 9.35E-01 |
| <b>PRR29</b>      | 0.50  | 3.59E-01 | 1.00E+00 | 0.47  | 5.83E-01 | 9.35E-01 |
| <b>GSTT1</b>      | 0.48  | 6.93E-01 | 1.00E+00 | 1.71  | 5.83E-01 | 9.35E-01 |
| <b>SLC25A15</b>   | -0.30 | 3.41E-01 | 1.00E+00 | -0.31 | 5.84E-01 | 9.35E-01 |
| <b>ABCC3</b>      | -0.38 | 3.00E-01 | 1.00E+00 | -0.21 | 5.84E-01 | 9.35E-01 |
| <b>NRG1</b>       | -0.26 | 4.83E-01 | 1.00E+00 | 0.28  | 5.84E-01 | 9.35E-01 |
| <b>RNA5-8SP4</b>  | NA    | NA       | NA       | -0.75 | 5.84E-01 | 9.35E-01 |
| <b>NNAT</b>       | 3.10  | 1.50E-02 | 7.62E-01 | -0.36 | 5.84E-01 | 9.35E-01 |
| <b>RECQL4</b>     | -0.37 | 2.24E-01 | 1.00E+00 | 0.35  | 5.84E-01 | 9.35E-01 |
| <b>AL353795.3</b> | 0.56  | 8.71E-01 | 1.00E+00 | 0.69  | 5.84E-01 | 9.35E-01 |
| <b>CYCSP55</b>    | -1.03 | 6.94E-01 | 1.00E+00 | -0.33 | 5.84E-01 | 9.35E-01 |

|                    |       |          |          |       |          |          |
|--------------------|-------|----------|----------|-------|----------|----------|
| <b>POLK</b>        | 0.22  | 5.38E-01 | 1.00E+00 | -0.14 | 5.84E-01 | 9.35E-01 |
| <b>IGKV1D-16</b>   | 1.94  | 4.96E-01 | 1.00E+00 | 1.75  | 5.84E-01 | 9.35E-01 |
| <b>SLC15A5</b>     | 0.56  | 8.71E-01 | 1.00E+00 | 1.26  | 5.84E-01 | 9.35E-01 |
| <b>RNASE2</b>      | -1.75 | 4.42E-01 | 1.00E+00 | 1.73  | 5.84E-01 | 9.35E-01 |
| <b>GRWD1</b>       | -0.04 | 8.87E-01 | 1.00E+00 | 0.11  | 5.84E-01 | 9.35E-01 |
| <b>XLOC_001406</b> | -3.40 | 4.18E-02 | 1.00E+00 | 0.65  | 5.84E-01 | 9.35E-01 |
| <b>AC113383.1</b>  | -0.38 | 4.72E-01 | 1.00E+00 | -0.33 | 5.84E-01 | 9.35E-01 |
| <b>TBC1D24</b>     | 0.39  | 3.27E-01 | 1.00E+00 | -0.17 | 5.84E-01 | 9.35E-01 |
| <b>EML3</b>        | 0.18  | 3.10E-01 | 1.00E+00 | 0.17  | 5.84E-01 | 9.35E-01 |
| <b>ZBTB4</b>       | -0.17 | 3.18E-01 | 1.00E+00 | 0.26  | 5.84E-01 | 9.35E-01 |
| <b>AK2</b>         | 0.00  | 9.88E-01 | 1.00E+00 | -0.08 | 5.84E-01 | 9.35E-01 |
| <b>PRH1</b>        | 1.30  | 2.62E-01 | 1.00E+00 | 0.29  | 5.84E-01 | 9.35E-01 |
| <b>ZNF460-AS1</b>  | 1.23  | 1.83E-01 | 1.00E+00 | -0.39 | 5.84E-01 | 9.35E-01 |
| <b>VPS72</b>       | 0.05  | 7.34E-01 | 1.00E+00 | -0.09 | 5.84E-01 | 9.35E-01 |
| <b>EIF2S3</b>      | 0.13  | 3.66E-01 | 1.00E+00 | 0.13  | 5.84E-01 | 9.35E-01 |
| <b>LINC00310</b>   | -0.30 | 7.40E-01 | 1.00E+00 | 0.45  | 5.84E-01 | 9.35E-01 |
| <b>KRT26</b>       | -6.44 | 5.02E-02 | 1.00E+00 | -1.75 | 5.84E-01 | 9.35E-01 |
| <b>SF3B3</b>       | 0.02  | 9.28E-01 | 1.00E+00 | 0.10  | 5.85E-01 | 9.35E-01 |
| <b>Z98049.1</b>    | 1.29  | 7.10E-01 | 1.00E+00 | -0.86 | 5.85E-01 | 9.35E-01 |
| <b>PTPN7</b>       | -0.13 | 8.22E-01 | 1.00E+00 | 1.45  | 5.85E-01 | 9.35E-01 |
| <b>PRF1</b>        | 0.14  | 8.24E-01 | 1.00E+00 | 1.66  | 5.85E-01 | 9.36E-01 |
| <b>ASXL3</b>       | 1.05  | 1.49E-01 | 1.00E+00 | 0.54  | 5.85E-01 | 9.36E-01 |
| <b>ZNF467</b>      | -0.87 | 2.02E-02 | 8.85E-01 | -0.26 | 5.85E-01 | 9.36E-01 |
| <b>HMG2P8</b>      | NA    | NA       | NA       | -0.45 | 5.85E-01 | 9.36E-01 |
| <b>G36510</b>      | -0.88 | 2.09E-01 | 1.00E+00 | -0.53 | 5.85E-01 | 9.36E-01 |
| <b>ZFPM2</b>       | -0.17 | 6.78E-01 | 1.00E+00 | -0.28 | 5.85E-01 | 9.36E-01 |
| <b>NWD1</b>        | 0.23  | 8.00E-01 | 1.00E+00 | -0.60 | 5.85E-01 | 9.36E-01 |
| <b>AC134349.1</b>  | NA    | NA       | NA       | 0.72  | 5.86E-01 | 9.36E-01 |
| <b>RBMS3-AS2</b>   | 0.39  | 8.42E-01 | 1.00E+00 | 0.41  | 5.86E-01 | 9.36E-01 |
| <b>CYP4B1</b>      | -0.08 | 8.88E-01 | 1.00E+00 | -0.27 | 5.86E-01 | 9.36E-01 |
| <b>IQGAP3</b>      | 0.15  | 6.38E-01 | 1.00E+00 | 0.35  | 5.86E-01 | 9.36E-01 |
| <b>FOXO1</b>       | -1.50 | 5.02E-03 | 4.15E-01 | 0.59  | 5.86E-01 | 9.36E-01 |

|              |       |          |          |       |          |          |
|--------------|-------|----------|----------|-------|----------|----------|
| ZNF202       | -0.25 | 3.30E-01 | 1.00E+00 | -0.22 | 5.86E-01 | 9.36E-01 |
| AC009554.2   | 1.61  | 2.79E-01 | 1.00E+00 | -0.57 | 5.86E-01 | 9.36E-01 |
| BTNL8        | 1.76  | 3.88E-01 | 1.00E+00 | 0.74  | 5.86E-01 | 9.36E-01 |
| SUCLG2P2     | 1.51  | 3.88E-01 | 1.00E+00 | -0.24 | 5.86E-01 | 9.36E-01 |
| XXYLT1       | -0.28 | 2.90E-01 | 1.00E+00 | 0.25  | 5.86E-01 | 9.36E-01 |
| IL23R        | -1.73 | 6.13E-01 | 1.00E+00 | 0.86  | 5.86E-01 | 9.36E-01 |
| TAC1         | -0.70 | 4.15E-01 | 1.00E+00 | -0.42 | 5.86E-01 | 9.36E-01 |
| PIK3CA       | 0.34  | 2.08E-01 | 1.00E+00 | -0.15 | 5.86E-01 | 9.36E-01 |
| AC134312.1   | 0.53  | 3.10E-01 | 1.00E+00 | 0.52  | 5.86E-01 | 9.36E-01 |
| SPRR2C       | 3.53  | 2.96E-01 | 1.00E+00 | 1.74  | 5.86E-01 | 9.36E-01 |
| AC138470.1   | 1.43  | 2.37E-01 | 1.00E+00 | 0.60  | 5.86E-01 | 9.36E-01 |
| CARD16       | -0.03 | 9.47E-01 | 1.00E+00 | 0.16  | 5.86E-01 | 9.36E-01 |
| ZC3H12C      | -0.35 | 3.97E-01 | 1.00E+00 | 0.23  | 5.86E-01 | 9.36E-01 |
| FAM234B      | 0.34  | 3.05E-01 | 1.00E+00 | -0.22 | 5.86E-01 | 9.36E-01 |
| CEPT1        | 0.20  | 4.73E-01 | 1.00E+00 | 0.20  | 5.86E-01 | 9.36E-01 |
| PCOLCE2      | 1.87  | 2.35E-03 | 2.45E-01 | -0.36 | 5.86E-01 | 9.36E-01 |
| LINC00092    | -0.16 | 8.31E-01 | 1.00E+00 | -0.66 | 5.86E-01 | 9.36E-01 |
| PCM1         | -0.08 | 5.82E-01 | 1.00E+00 | -0.09 | 5.86E-01 | 9.36E-01 |
| DMC1         | -0.39 | 4.11E-01 | 1.00E+00 | 0.28  | 5.86E-01 | 9.36E-01 |
| WDR35        | 0.00  | 9.92E-01 | 1.00E+00 | 0.17  | 5.86E-01 | 9.36E-01 |
| P4HA1        | 0.18  | 5.30E-01 | 1.00E+00 | 0.13  | 5.86E-01 | 9.36E-01 |
| AC226118.1   | -0.84 | 4.69E-01 | 1.00E+00 | 0.70  | 5.86E-01 | 9.36E-01 |
| AC021087.2   | -1.46 | 2.25E-01 | 1.00E+00 | -0.49 | 5.86E-01 | 9.36E-01 |
| ENPP3        | 0.90  | 8.74E-02 | 1.00E+00 | 0.42  | 5.86E-01 | 9.36E-01 |
| GNL1         | 0.02  | 8.56E-01 | 1.00E+00 | 0.22  | 5.87E-01 | 9.36E-01 |
| AC010503.4   | 0.23  | 5.91E-01 | 1.00E+00 | -0.28 | 5.87E-01 | 9.36E-01 |
| ZNF488       | -0.28 | 5.66E-01 | 1.00E+00 | 0.44  | 5.87E-01 | 9.36E-01 |
| RAB35        | -0.15 | 4.44E-01 | 1.00E+00 | 0.25  | 5.87E-01 | 9.36E-01 |
| RP11-61J19.4 | 0.22  | 6.01E-01 | 1.00E+00 | -0.33 | 5.87E-01 | 9.36E-01 |
| BCR          | -0.36 | 8.97E-02 | 1.00E+00 | 0.28  | 5.87E-01 | 9.36E-01 |
| PDE11A       | 1.75  | 2.78E-01 | 1.00E+00 | 0.49  | 5.87E-01 | 9.36E-01 |
| HDCC3        | 0.18  | 4.74E-01 | 1.00E+00 | -0.21 | 5.87E-01 | 9.36E-01 |

|            |       |          |          |       |          |          |
|------------|-------|----------|----------|-------|----------|----------|
| LINC00989  | -0.94 | 7.99E-02 | 1.00E+00 | -0.40 | 5.87E-01 | 9.36E-01 |
| ZNF329     | -0.08 | 7.06E-01 | 1.00E+00 | 0.26  | 5.87E-01 | 9.36E-01 |
| AC009309.1 | -1.82 | 1.69E-01 | 1.00E+00 | -0.32 | 5.87E-01 | 9.36E-01 |
| OTUD5      | -0.11 | 4.83E-01 | 1.00E+00 | 0.22  | 5.87E-01 | 9.36E-01 |
| SOCS1      | -1.53 | 1.13E-03 | 1.76E-01 | -0.44 | 5.87E-01 | 9.36E-01 |
| NKAIN1     | -0.26 | 7.39E-01 | 1.00E+00 | 0.25  | 5.87E-01 | 9.36E-01 |
| TIFA       | 0.40  | 2.01E-01 | 1.00E+00 | -0.18 | 5.87E-01 | 9.36E-01 |
| KALRN      | -0.20 | 6.90E-01 | 1.00E+00 | 0.25  | 5.87E-01 | 9.36E-01 |
| SLC6A17    | -0.32 | 5.16E-01 | 1.00E+00 | 0.48  | 5.87E-01 | 9.36E-01 |
| STAMBPL1   | -0.24 | 5.28E-01 | 1.00E+00 | 0.18  | 5.87E-01 | 9.36E-01 |
| RPS7P11    | -0.35 | 4.44E-01 | 1.00E+00 | -0.25 | 5.87E-01 | 9.36E-01 |
| MRPS25     | -0.01 | 9.58E-01 | 1.00E+00 | -0.14 | 5.87E-01 | 9.36E-01 |
| DYRK4      | 0.16  | 4.96E-01 | 1.00E+00 | 0.13  | 5.87E-01 | 9.36E-01 |
| HELZ       | 0.18  | 4.71E-01 | 1.00E+00 | 0.09  | 5.87E-01 | 9.36E-01 |
| PCDHB10    | 0.14  | 6.92E-01 | 1.00E+00 | 0.35  | 5.87E-01 | 9.36E-01 |
| AC126614.1 | -1.85 | 3.29E-01 | 1.00E+00 | 0.74  | 5.87E-01 | 9.36E-01 |
| SAE1       | 0.03  | 8.48E-01 | 1.00E+00 | 0.07  | 5.87E-01 | 9.36E-01 |
| ARHGAP40   | 0.38  | 5.34E-01 | 1.00E+00 | 0.31  | 5.87E-01 | 9.36E-01 |
| CASP2      | -0.01 | 9.64E-01 | 1.00E+00 | 0.14  | 5.87E-01 | 9.36E-01 |
| IL6ST      | 0.41  | 2.63E-01 | 1.00E+00 | 0.19  | 5.87E-01 | 9.36E-01 |
| MIGA2      | -0.01 | 9.73E-01 | 1.00E+00 | 0.31  | 5.87E-01 | 9.36E-01 |
| AC046168.2 | -0.91 | 1.65E-01 | 1.00E+00 | 0.40  | 5.87E-01 | 9.36E-01 |
| TKTL1      | -1.97 | 2.29E-01 | 1.00E+00 | -0.56 | 5.88E-01 | 9.36E-01 |
| TUBAL3     | -0.18 | 8.26E-01 | 1.00E+00 | -0.53 | 5.88E-01 | 9.36E-01 |
| ARHGDI3    | 0.00  | 9.93E-01 | 1.00E+00 | 0.16  | 5.88E-01 | 9.36E-01 |
| FN3KRP     | 0.55  | 9.53E-03 | 6.06E-01 | -0.10 | 5.88E-01 | 9.36E-01 |
| SLC9B1     | 0.46  | 4.72E-01 | 1.00E+00 | 0.30  | 5.88E-01 | 9.36E-01 |
| LAMA1      | -0.38 | 5.42E-01 | 1.00E+00 | 1.51  | 5.88E-01 | 9.36E-01 |
| RPSAP18    | 0.97  | 4.11E-01 | 1.00E+00 | 0.50  | 5.88E-01 | 9.36E-01 |
| ST7-AS1    | -0.75 | 6.35E-02 | 1.00E+00 | -0.44 | 5.88E-01 | 9.36E-01 |
| RTCA       | 0.28  | 2.53E-01 | 1.00E+00 | 0.11  | 5.88E-01 | 9.36E-01 |
| G32932     | 0.22  | 9.17E-01 | 1.00E+00 | 0.70  | 5.88E-01 | 9.36E-01 |

|                    |       |          |          |       |          |          |
|--------------------|-------|----------|----------|-------|----------|----------|
| <b>CDCA3</b>       | 0.24  | 5.43E-01 | 1.00E+00 | 0.31  | 5.88E-01 | 9.36E-01 |
| <b>STAR</b>        | -0.15 | 6.60E-01 | 1.00E+00 | -0.33 | 5.88E-01 | 9.36E-01 |
| <b>THAP4</b>       | -0.23 | 2.32E-01 | 1.00E+00 | 0.11  | 5.88E-01 | 9.36E-01 |
| <b>LEXM</b>        | 0.35  | 6.59E-01 | 1.00E+00 | 0.43  | 5.88E-01 | 9.36E-01 |
| <b>CHCHD6</b>      | -0.13 | 4.63E-01 | 1.00E+00 | -0.11 | 5.88E-01 | 9.36E-01 |
| <b>PISD</b>        | 0.24  | 4.23E-01 | 1.00E+00 | -0.16 | 5.88E-01 | 9.36E-01 |
| <b>NET1</b>        | -0.11 | 5.99E-01 | 1.00E+00 | -0.12 | 5.88E-01 | 9.36E-01 |
| <b>NME5</b>        | 0.17  | 7.99E-01 | 1.00E+00 | -0.34 | 5.88E-01 | 9.36E-01 |
| <b>ODF3L2</b>      | -1.19 | 3.02E-01 | 1.00E+00 | 0.70  | 5.88E-01 | 9.36E-01 |
| <b>KCNH8</b>       | -1.70 | 1.59E-01 | 1.00E+00 | -0.57 | 5.88E-01 | 9.36E-01 |
| <b>PROS2P</b>      | -2.28 | 2.65E-01 | 1.00E+00 | 0.48  | 5.88E-01 | 9.36E-01 |
| <b>F12</b>         | -0.02 | 9.62E-01 | 1.00E+00 | 0.32  | 5.88E-01 | 9.36E-01 |
| <b>DDX52</b>       | -0.06 | 7.74E-01 | 1.00E+00 | -0.10 | 5.88E-01 | 9.36E-01 |
| <b>AL356535.1</b>  | 1.06  | 7.61E-01 | 1.00E+00 | 0.47  | 5.88E-01 | 9.36E-01 |
| <b>EEF1B2P3</b>    | -0.04 | 9.29E-01 | 1.00E+00 | -0.22 | 5.88E-01 | 9.36E-01 |
| <b>SYCE2</b>       | 0.23  | 7.63E-01 | 1.00E+00 | -0.34 | 5.88E-01 | 9.36E-01 |
| <b>XLOC_001435</b> | 0.25  | 7.69E-01 | 1.00E+00 | 0.49  | 5.88E-01 | 9.36E-01 |
| <b>SPINK5</b>      | 0.15  | 7.33E-01 | 1.00E+00 | 0.39  | 5.88E-01 | 9.36E-01 |
| <b>CASC1</b>       | -1.25 | 7.62E-02 | 1.00E+00 | -0.42 | 5.89E-01 | 9.36E-01 |
| <b>ZNF691</b>      | -0.12 | 6.83E-01 | 1.00E+00 | -0.17 | 5.89E-01 | 9.36E-01 |
| <b>AC244517.1</b>  | 0.53  | 8.13E-01 | 1.00E+00 | 0.57  | 5.89E-01 | 9.36E-01 |
| <b>B3GNT10</b>     | -0.01 | 9.68E-01 | 1.00E+00 | -0.21 | 5.89E-01 | 9.36E-01 |
| <b>ZNF606</b>      | 0.05  | 8.65E-01 | 1.00E+00 | -0.15 | 5.89E-01 | 9.36E-01 |
| <b>NEK3</b>        | -0.23 | 5.41E-01 | 1.00E+00 | -0.22 | 5.89E-01 | 9.36E-01 |
| <b>XLOC_001373</b> | -3.17 | 7.84E-02 | 1.00E+00 | 0.62  | 5.89E-01 | 9.36E-01 |
| <b>SNX18P7</b>     | 0.23  | 6.64E-01 | 1.00E+00 | 0.84  | 5.89E-01 | 9.36E-01 |
| <b>BICD2</b>       | 0.09  | 8.11E-01 | 1.00E+00 | -0.26 | 5.89E-01 | 9.36E-01 |
| <b>PIK3R1</b>      | 0.61  | 1.02E-01 | 1.00E+00 | 0.21  | 5.89E-01 | 9.36E-01 |
| <b>UAP1L1</b>      | -0.31 | 2.74E-01 | 1.00E+00 | 0.37  | 5.89E-01 | 9.36E-01 |
| <b>HOXC10</b>      | -0.21 | 6.21E-01 | 1.00E+00 | -0.20 | 5.89E-01 | 9.36E-01 |
| <b>TAF6</b>        | -0.07 | 7.43E-01 | 1.00E+00 | 0.14  | 5.89E-01 | 9.36E-01 |
| <b>GPER1</b>       | 0.85  | 1.18E-01 | 1.00E+00 | -0.31 | 5.89E-01 | 9.36E-01 |

|                   |       |          |          |       |          |          |
|-------------------|-------|----------|----------|-------|----------|----------|
| <b>TCF12</b>      | 0.11  | 6.40E-01 | 1.00E+00 | 0.10  | 5.89E-01 | 9.36E-01 |
| <b>ZC3H10</b>     | 0.17  | 6.52E-01 | 1.00E+00 | -0.21 | 5.89E-01 | 9.36E-01 |
| <b>G2927</b>      | -3.12 | 7.10E-02 | 1.00E+00 | 0.76  | 5.89E-01 | 9.36E-01 |
| <b>KRT25</b>      | -5.06 | 1.23E-01 | 1.00E+00 | -1.70 | 5.89E-01 | 9.36E-01 |
| <b>DNAH5</b>      | -0.21 | 8.27E-01 | 1.00E+00 | 0.51  | 5.89E-01 | 9.36E-01 |
| <b>C7orf57</b>    | 2.80  | 1.89E-01 | 1.00E+00 | 0.77  | 5.89E-01 | 9.36E-01 |
| <b>CCDC57</b>     | -0.20 | 5.16E-01 | 1.00E+00 | 0.17  | 5.89E-01 | 9.36E-01 |
| <b>YPEL5</b>      | 0.08  | 7.04E-01 | 1.00E+00 | -0.15 | 5.89E-01 | 9.36E-01 |
| <b>AC145285.6</b> | -3.11 | 8.05E-03 | 5.53E-01 | 0.40  | 5.90E-01 | 9.36E-01 |
| <b>AC002525.1</b> | 0.34  | 6.38E-01 | 1.00E+00 | 0.34  | 5.90E-01 | 9.36E-01 |
| <b>PTP4A1</b>     | -1.09 | 1.81E-01 | 1.00E+00 | 0.44  | 5.90E-01 | 9.36E-01 |
| <b>SNHG16</b>     | 0.07  | 7.45E-01 | 1.00E+00 | 0.12  | 5.90E-01 | 9.36E-01 |
| <b>ZNF16</b>      | 0.04  | 8.61E-01 | 1.00E+00 | 0.12  | 5.90E-01 | 9.36E-01 |
| <b>ZNF891</b>     | 0.04  | 9.01E-01 | 1.00E+00 | -0.24 | 5.90E-01 | 9.36E-01 |
| <b>FAM114A2</b>   | 0.11  | 5.91E-01 | 1.00E+00 | -0.12 | 5.90E-01 | 9.36E-01 |
| <b>EPB41L5</b>    | 0.15  | 5.36E-01 | 1.00E+00 | -0.14 | 5.90E-01 | 9.36E-01 |
| <b>TSTA3</b>      | -0.33 | 3.67E-01 | 1.00E+00 | 0.16  | 5.90E-01 | 9.36E-01 |
| <b>DNAJC8</b>     | -0.03 | 8.51E-01 | 1.00E+00 | -0.13 | 5.90E-01 | 9.36E-01 |
| <b>SLK</b>        | -0.22 | 3.39E-01 | 1.00E+00 | -0.18 | 5.90E-01 | 9.36E-01 |
| <b>CC2D2B</b>     | -0.17 | 9.01E-01 | 1.00E+00 | 0.40  | 5.90E-01 | 9.36E-01 |
| <b>IGHV3-43</b>   | 2.13  | 3.93E-01 | 1.00E+00 | 1.72  | 5.90E-01 | 9.36E-01 |
| <b>TDRD6</b>      | -0.43 | 5.99E-01 | 1.00E+00 | 0.49  | 5.90E-01 | 9.36E-01 |
| <b>AL022067.1</b> | -1.92 | 5.74E-01 | 1.00E+00 | -0.74 | 5.90E-01 | 9.36E-01 |
| <b>AC004552.1</b> | 1.03  | 2.12E-01 | 1.00E+00 | -0.34 | 5.90E-01 | 9.36E-01 |
| <b>DDX51</b>      | -0.24 | 3.18E-01 | 1.00E+00 | -0.26 | 5.90E-01 | 9.36E-01 |
| <b>UQCC3</b>      | -0.33 | 4.40E-01 | 1.00E+00 | -0.28 | 5.91E-01 | 9.36E-01 |
| <b>NPAS3</b>      | -0.08 | 8.83E-01 | 1.00E+00 | 0.33  | 5.91E-01 | 9.36E-01 |
| <b>MPIG6B</b>     | -0.07 | 9.02E-01 | 1.00E+00 | -0.28 | 5.91E-01 | 9.36E-01 |
| <b>NR3C2</b>      | -0.14 | 7.14E-01 | 1.00E+00 | -0.21 | 5.91E-01 | 9.36E-01 |
| <b>NPTXR</b>      | -0.13 | 8.17E-01 | 1.00E+00 | 0.35  | 5.91E-01 | 9.36E-01 |
| <b>GALNT4</b>     | 0.53  | 4.62E-01 | 1.00E+00 | 0.29  | 5.91E-01 | 9.36E-01 |
| <b>ZNF584</b>     | -0.32 | 3.82E-01 | 1.00E+00 | 0.12  | 5.91E-01 | 9.36E-01 |



|                   |       |          |          |       |          |          |
|-------------------|-------|----------|----------|-------|----------|----------|
| <b>RNMT</b>       | 0.17  | 3.74E-01 | 1.00E+00 | 0.11  | 5.91E-01 | 9.36E-01 |
| <b>RHEBP2</b>     | 0.21  | 7.78E-01 | 1.00E+00 | -0.22 | 5.91E-01 | 9.36E-01 |
| <b>LRRC38</b>     | 1.00  | 3.40E-01 | 1.00E+00 | -0.63 | 5.91E-01 | 9.36E-01 |
| <b>ACSM6</b>      | 1.10  | 3.67E-01 | 1.00E+00 | -1.69 | 5.91E-01 | 9.36E-01 |
| <b>SRBD1</b>      | -0.04 | 8.92E-01 | 1.00E+00 | 0.14  | 5.91E-01 | 9.36E-01 |
| <b>TPI1P1</b>     | -0.90 | 1.82E-01 | 1.00E+00 | 0.31  | 5.91E-01 | 9.36E-01 |
| <b>ZNF782</b>     | -0.10 | 8.06E-01 | 1.00E+00 | -0.24 | 5.91E-01 | 9.36E-01 |
| <b>LAS1L</b>      | -0.21 | 2.24E-01 | 1.00E+00 | 0.08  | 5.91E-01 | 9.36E-01 |
| <b>SLC25A46</b>   | -0.05 | 8.67E-01 | 1.00E+00 | -0.08 | 5.91E-01 | 9.36E-01 |
| <b>MCM6</b>       | -0.09 | 6.11E-01 | 1.00E+00 | 0.10  | 5.91E-01 | 9.36E-01 |
| <b>DPCD</b>       | 0.08  | 7.90E-01 | 1.00E+00 | 0.14  | 5.91E-01 | 9.36E-01 |
| <b>DDB1</b>       | 0.06  | 7.36E-01 | 1.00E+00 | -0.14 | 5.91E-01 | 9.36E-01 |
| <b>GSR</b>        | 0.28  | 2.26E-01 | 1.00E+00 | -0.36 | 5.91E-01 | 9.36E-01 |
| <b>ENPP1</b>      | 0.76  | 1.57E-01 | 1.00E+00 | -0.28 | 5.91E-01 | 9.36E-01 |
| <b>UBTF</b>       | -0.25 | 2.49E-01 | 1.00E+00 | 0.18  | 5.91E-01 | 9.36E-01 |
| <b>AC027290.2</b> | 0.18  | 7.81E-01 | 1.00E+00 | -0.24 | 5.91E-01 | 9.36E-01 |
| <b>LIN37</b>      | -1.94 | 1.34E-01 | 1.00E+00 | 0.35  | 5.91E-01 | 9.36E-01 |
| <b>ANKRD42</b>    | 0.16  | 3.95E-01 | 1.00E+00 | 0.17  | 5.91E-01 | 9.36E-01 |
| <b>AC092645.1</b> | 0.56  | 1.40E-01 | 1.00E+00 | 0.43  | 5.91E-01 | 9.36E-01 |
| <b>AC108215.1</b> | 0.30  | 5.99E-01 | 1.00E+00 | 0.37  | 5.91E-01 | 9.36E-01 |
| <b>RAD17</b>      | 0.34  | 8.51E-02 | 1.00E+00 | -0.12 | 5.92E-01 | 9.36E-01 |
| <b>N6AMT1</b>     | 0.51  | 3.01E-01 | 1.00E+00 | 0.16  | 5.92E-01 | 9.36E-01 |
| <b>HCG9</b>       | -0.54 | 8.41E-01 | 1.00E+00 | 0.55  | 5.92E-01 | 9.36E-01 |
| <b>LINC00539</b>  | -0.11 | 9.31E-01 | 1.00E+00 | 0.33  | 5.92E-01 | 9.36E-01 |
| <b>SCAMP4</b>     | -0.30 | 2.01E-01 | 1.00E+00 | 0.22  | 5.92E-01 | 9.36E-01 |
| <b>AL022322.2</b> | -1.41 | 4.82E-01 | 1.00E+00 | 0.46  | 5.92E-01 | 9.36E-01 |
| <b>AL031963.2</b> | 0.76  | 7.00E-01 | 1.00E+00 | -0.79 | 5.92E-01 | 9.36E-01 |
| <b>ABCE1</b>      | 0.15  | 5.04E-01 | 1.00E+00 | 0.11  | 5.92E-01 | 9.36E-01 |
| <b>KCNS1</b>      | -0.10 | 8.03E-01 | 1.00E+00 | 0.46  | 5.92E-01 | 9.36E-01 |
| <b>C8orf82</b>    | -0.33 | 1.94E-01 | 1.00E+00 | -0.42 | 5.92E-01 | 9.36E-01 |
| <b>AL353801.3</b> | -1.10 | 7.51E-01 | 1.00E+00 | 0.84  | 5.92E-01 | 9.36E-01 |
| <b>RAB30</b>      | 0.44  | 1.98E-01 | 1.00E+00 | 0.18  | 5.92E-01 | 9.36E-01 |

|                   |       |          |          |       |          |          |
|-------------------|-------|----------|----------|-------|----------|----------|
| <b>BX640514.2</b> | -1.52 | 6.54E-02 | 1.00E+00 | -0.36 | 5.92E-01 | 9.36E-01 |
| <b>FSTL3</b>      | 0.24  | 6.34E-01 | 1.00E+00 | 0.36  | 5.92E-01 | 9.36E-01 |
| <b>THUMPD3</b>    | -0.02 | 9.13E-01 | 1.00E+00 | -0.09 | 5.92E-01 | 9.36E-01 |
| <b>DGCR6L</b>     | -0.20 | 3.71E-01 | 1.00E+00 | 0.12  | 5.92E-01 | 9.36E-01 |
| <b>DNHD1</b>      | -0.37 | 3.52E-01 | 1.00E+00 | 0.31  | 5.92E-01 | 9.36E-01 |
| <b>MRPS17</b>     | 0.44  | 1.01E-01 | 1.00E+00 | -0.20 | 5.92E-01 | 9.36E-01 |
| <b>LDB3</b>       | -0.33 | 6.30E-01 | 1.00E+00 | -0.35 | 5.92E-01 | 9.36E-01 |
| <b>MAP7D2</b>     | -1.01 | 2.32E-02 | 9.14E-01 | -0.34 | 5.92E-01 | 9.36E-01 |
| <b>RGS17P1</b>    | -2.76 | 2.14E-01 | 1.00E+00 | -0.56 | 5.92E-01 | 9.36E-01 |
| <b>UBE2A</b>      | 0.02  | 9.25E-01 | 1.00E+00 | -0.11 | 5.92E-01 | 9.36E-01 |
| <b>MIB2</b>       | -0.25 | 4.43E-01 | 1.00E+00 | -0.33 | 5.92E-01 | 9.36E-01 |
| <b>LEKR1</b>      | -0.28 | 7.39E-01 | 1.00E+00 | 0.32  | 5.92E-01 | 9.36E-01 |
| <b>DUS2</b>       | -0.33 | 2.25E-01 | 1.00E+00 | -0.12 | 5.92E-01 | 9.36E-01 |
| <b>RAB7A</b>      | 0.04  | 8.19E-01 | 1.00E+00 | 0.06  | 5.92E-01 | 9.36E-01 |
| <b>COCH</b>       | -1.62 | 6.12E-01 | 1.00E+00 | -0.39 | 5.93E-01 | 9.37E-01 |
| <b>GCC2</b>       | -0.09 | 7.76E-01 | 1.00E+00 | 0.11  | 5.93E-01 | 9.37E-01 |
| <b>ERCC6L2</b>    | -0.17 | 5.51E-01 | 1.00E+00 | -0.12 | 5.93E-01 | 9.37E-01 |
| <b>ACAD9</b>      | -0.08 | 8.44E-01 | 1.00E+00 | -0.16 | 5.93E-01 | 9.37E-01 |
| <b>G15152</b>     | -0.48 | 6.32E-01 | 1.00E+00 | 0.60  | 5.93E-01 | 9.37E-01 |
| <b>INVS</b>       | 0.20  | 4.53E-01 | 1.00E+00 | 0.16  | 5.93E-01 | 9.37E-01 |
| <b>LINC01366</b>  | 2.90  | 7.01E-02 | 1.00E+00 | -0.82 | 5.93E-01 | 9.37E-01 |
| <b>C4orf36</b>    | -2.57 | 6.36E-03 | 4.78E-01 | 0.33  | 5.93E-01 | 9.37E-01 |
| <b>PACS2</b>      | -0.10 | 7.15E-01 | 1.00E+00 | 0.21  | 5.93E-01 | 9.37E-01 |
| <b>PRRT2</b>      | 1.24  | 6.19E-01 | 1.00E+00 | -0.36 | 5.93E-01 | 9.37E-01 |
| <b>ARID2</b>      | 0.13  | 5.75E-01 | 1.00E+00 | -0.17 | 5.93E-01 | 9.37E-01 |
| <b>AL132656.2</b> | -0.48 | 5.50E-01 | 1.00E+00 | 0.33  | 5.93E-01 | 9.37E-01 |
| <b>AC011287.1</b> | -0.61 | 6.68E-01 | 1.00E+00 | -0.61 | 5.93E-01 | 9.37E-01 |
| <b>ANKRD13C</b>   | 0.12  | 5.60E-01 | 1.00E+00 | -0.11 | 5.93E-01 | 9.37E-01 |
| <b>SPSB1</b>      | -0.32 | 2.71E-01 | 1.00E+00 | -0.24 | 5.93E-01 | 9.37E-01 |
| <b>AC012378.2</b> | -2.97 | 6.43E-03 | 4.81E-01 | -0.61 | 5.93E-01 | 9.37E-01 |
| <b>MMP24OS</b>    | 0.04  | 8.80E-01 | 1.00E+00 | 0.34  | 5.93E-01 | 9.37E-01 |
| <b>NOX5</b>       | -0.27 | 6.54E-01 | 1.00E+00 | 0.51  | 5.93E-01 | 9.37E-01 |

|                   |       |          |          |       |          |          |
|-------------------|-------|----------|----------|-------|----------|----------|
| <b>C18orf54</b>   | 0.21  | 5.94E-01 | 1.00E+00 | -0.32 | 5.93E-01 | 9.37E-01 |
| <b>ACOX3</b>      | -0.31 | 1.76E-01 | 1.00E+00 | 0.11  | 5.93E-01 | 9.37E-01 |
| <b>Z82243.1</b>   | 0.05  | 9.89E-01 | 1.00E+00 | -0.69 | 5.93E-01 | 9.37E-01 |
| <b>MRPL51</b>     | 0.09  | 5.92E-01 | 1.00E+00 | -0.15 | 5.93E-01 | 9.37E-01 |
| <b>KRTAP5-8</b>   | -1.89 | 5.82E-01 | 1.00E+00 | -1.71 | 5.93E-01 | 9.37E-01 |
| <b>SLC35D2</b>    | -0.05 | 8.86E-01 | 1.00E+00 | -0.24 | 5.94E-01 | 9.37E-01 |
| <b>COL21A1</b>    | 0.02  | 9.39E-01 | 1.00E+00 | 0.18  | 5.94E-01 | 9.37E-01 |
| <b>MRPS5</b>      | 0.09  | 6.72E-01 | 1.00E+00 | 0.09  | 5.94E-01 | 9.37E-01 |
| <b>ATP5IF1</b>    | -0.08 | 7.02E-01 | 1.00E+00 | -0.19 | 5.94E-01 | 9.37E-01 |
| <b>SMYD2</b>      | -0.03 | 8.74E-01 | 1.00E+00 | -0.14 | 5.94E-01 | 9.37E-01 |
| <b>SELENOO</b>    | -0.02 | 9.36E-01 | 1.00E+00 | 0.30  | 5.94E-01 | 9.37E-01 |
| <b>SNORD12C</b>   | -1.71 | 6.18E-01 | 1.00E+00 | -0.46 | 5.94E-01 | 9.37E-01 |
| <b>FCRL6</b>      | -0.19 | 8.55E-01 | 1.00E+00 | 1.68  | 5.94E-01 | 9.37E-01 |
| <b>G10656</b>     | -0.29 | 7.00E-01 | 1.00E+00 | 0.41  | 5.94E-01 | 9.37E-01 |
| <b>STX7</b>       | 0.47  | 2.88E-02 | 9.88E-01 | -0.08 | 5.94E-01 | 9.37E-01 |
| <b>ZXDC</b>       | -0.30 | 3.00E-01 | 1.00E+00 | -0.28 | 5.94E-01 | 9.37E-01 |
| <b>DSN1</b>       | 0.10  | 6.55E-01 | 1.00E+00 | -0.13 | 5.94E-01 | 9.37E-01 |
| <b>CNNM4</b>      | -0.18 | 6.71E-01 | 1.00E+00 | 0.30  | 5.94E-01 | 9.37E-01 |
| <b>SLC5A3</b>     | 0.52  | 1.98E-01 | 1.00E+00 | 0.17  | 5.94E-01 | 9.37E-01 |
| <b>AC103591.4</b> | -0.40 | 6.71E-01 | 1.00E+00 | -0.46 | 5.94E-01 | 9.37E-01 |
| <b>DCAF12</b>     | 0.19  | 4.20E-01 | 1.00E+00 | 0.11  | 5.94E-01 | 9.37E-01 |
| <b>TXNDC5</b>     | -1.10 | 7.44E-02 | 1.00E+00 | 0.57  | 5.94E-01 | 9.37E-01 |
| <b>HELB</b>       | 0.46  | 4.54E-01 | 1.00E+00 | 0.33  | 5.95E-01 | 9.37E-01 |
| <b>CPA4</b>       | -0.10 | 8.43E-01 | 1.00E+00 | 0.30  | 5.95E-01 | 9.37E-01 |
| <b>ZNF596</b>     | 0.32  | 2.12E-01 | 1.00E+00 | -0.24 | 5.95E-01 | 9.37E-01 |
| <b>UXT-AS1</b>    | -1.38 | 4.48E-01 | 1.00E+00 | -0.53 | 5.95E-01 | 9.37E-01 |
| <b>KIF17</b>      | -0.30 | 4.55E-01 | 1.00E+00 | 0.37  | 5.95E-01 | 9.37E-01 |
| <b>CARD8</b>      | 0.41  | 3.18E-01 | 1.00E+00 | 0.18  | 5.95E-01 | 9.37E-01 |
| <b>OSGIN1</b>     | -0.33 | 4.98E-01 | 1.00E+00 | 0.24  | 5.95E-01 | 9.37E-01 |
| <b>ABCF2</b>      | -0.34 | 1.56E-01 | 1.00E+00 | 0.12  | 5.95E-01 | 9.37E-01 |
| <b>AC129492.1</b> | -3.02 | 4.40E-02 | 1.00E+00 | 0.32  | 5.95E-01 | 9.37E-01 |
| <b>SYTL5</b>      | 1.55  | 2.50E-01 | 1.00E+00 | 0.66  | 5.95E-01 | 9.38E-01 |

|                    |        |          |          |       |          |          |
|--------------------|--------|----------|----------|-------|----------|----------|
| <b>UTS2B</b>       | 0.28   | 8.41E-01 | 1.00E+00 | 0.70  | 5.95E-01 | 9.38E-01 |
| <b>HTRA2</b>       | 0.16   | 4.82E-01 | 1.00E+00 | -0.11 | 5.95E-01 | 9.38E-01 |
| <b>CD80</b>        | -1.76  | 4.94E-01 | 1.00E+00 | 1.68  | 5.95E-01 | 9.38E-01 |
| <b>SERBP1P1</b>    | -0.27  | 7.70E-01 | 1.00E+00 | 0.23  | 5.95E-01 | 9.38E-01 |
| <b>OTULIN</b>      | 0.21   | 5.10E-01 | 1.00E+00 | -0.19 | 5.95E-01 | 9.38E-01 |
| <b>TMEM231P1</b>   | -0.83  | 5.07E-01 | 1.00E+00 | 0.48  | 5.95E-01 | 9.38E-01 |
| <b>AC021739.2</b>  | -0.37  | 7.94E-01 | 1.00E+00 | 0.68  | 5.95E-01 | 9.38E-01 |
| <b>ACSM2B</b>      | -1.71  | 5.49E-01 | 1.00E+00 | -1.04 | 5.95E-01 | 9.38E-01 |
| <b>CHKB-DT</b>     | 1.00   | 2.12E-01 | 1.00E+00 | -0.22 | 5.95E-01 | 9.38E-01 |
| <b>SPP1</b>        | 1.26   | 3.78E-01 | 1.00E+00 | 1.66  | 5.96E-01 | 9.38E-01 |
| <b>C16orf45</b>    | 0.39   | 3.45E-01 | 1.00E+00 | 0.26  | 5.96E-01 | 9.38E-01 |
| <b>DANCR</b>       | -0.37  | 4.30E-01 | 1.00E+00 | -0.25 | 5.96E-01 | 9.38E-01 |
| <b>LINC01694</b>   | -2.36  | 1.61E-01 | 1.00E+00 | 0.86  | 5.96E-01 | 9.38E-01 |
| <b>AC004908.2</b>  | -2.78  | 3.43E-02 | 1.00E+00 | -0.37 | 5.96E-01 | 9.38E-01 |
| <b>ZNF221</b>      | 0.65   | 1.74E-01 | 1.00E+00 | -0.36 | 5.96E-01 | 9.38E-01 |
| <b>WIPI2</b>       | 0.03   | 8.60E-01 | 1.00E+00 | -0.21 | 5.96E-01 | 9.38E-01 |
| <b>NFXL1</b>       | -0.14  | 6.90E-01 | 1.00E+00 | 0.16  | 5.96E-01 | 9.38E-01 |
| <b>G7635</b>       | -1.11  | 4.12E-01 | 1.00E+00 | -0.35 | 5.96E-01 | 9.38E-01 |
| <b>APEH</b>        | -0.19  | 3.65E-01 | 1.00E+00 | 0.12  | 5.96E-01 | 9.38E-01 |
| <b>ZNF808</b>      | -0.01  | 9.77E-01 | 1.00E+00 | -0.15 | 5.96E-01 | 9.38E-01 |
| <b>THAP9</b>       | 0.22   | 3.86E-01 | 1.00E+00 | -0.19 | 5.96E-01 | 9.38E-01 |
| <b>DRC1</b>        | -0.64  | 7.33E-01 | 1.00E+00 | -0.73 | 5.96E-01 | 9.38E-01 |
| <b>XLOC_006441</b> | -0.27  | 5.97E-01 | 1.00E+00 | -0.32 | 5.96E-01 | 9.38E-01 |
| <b>KRT28</b>       | -10.48 | 1.66E-03 | 2.25E-01 | -1.68 | 5.96E-01 | 9.38E-01 |
| <b>MED6</b>        | 0.06   | 7.51E-01 | 1.00E+00 | -0.11 | 5.96E-01 | 9.38E-01 |
| <b>AC073861.1</b>  | -0.10  | 7.83E-01 | 1.00E+00 | -0.29 | 5.96E-01 | 9.38E-01 |
| <b>IL37</b>        | 0.80   | 2.52E-01 | 1.00E+00 | -0.52 | 5.96E-01 | 9.38E-01 |
| <b>HCFC1R1</b>     | -0.21  | 4.78E-01 | 1.00E+00 | 0.12  | 5.96E-01 | 9.38E-01 |
| <b>SLC35F1</b>     | -0.07  | 8.73E-01 | 1.00E+00 | 0.31  | 5.96E-01 | 9.38E-01 |
| <b>CTCF</b>        | -0.10  | 5.84E-01 | 1.00E+00 | -0.19 | 5.96E-01 | 9.38E-01 |
| <b>ZDHH18</b>      | -0.14  | 6.15E-01 | 1.00E+00 | 0.27  | 5.96E-01 | 9.38E-01 |
| <b>AC009237.3</b>  | -0.01  | 9.89E-01 | 1.00E+00 | -0.28 | 5.96E-01 | 9.38E-01 |

|             |       |          |          |       |          |          |
|-------------|-------|----------|----------|-------|----------|----------|
| KIAA2013    | -0.21 | 4.26E-01 | 1.00E+00 | -0.29 | 5.96E-01 | 9.38E-01 |
| XLOC_002080 | 0.92  | 6.01E-01 | 1.00E+00 | -0.72 | 5.97E-01 | 9.38E-01 |
| AC005779.1  | 0.53  | 7.78E-01 | 1.00E+00 | 0.51  | 5.97E-01 | 9.38E-01 |
| PYURF       | 0.17  | 3.54E-01 | 1.00E+00 | -0.19 | 5.97E-01 | 9.38E-01 |
| SRP72       | -0.12 | 5.86E-01 | 1.00E+00 | 0.06  | 5.97E-01 | 9.38E-01 |
| RAB5IF      | 0.02  | 9.49E-01 | 1.00E+00 | 0.24  | 5.97E-01 | 9.38E-01 |
| AL136984.1  | 1.44  | 6.75E-01 | 1.00E+00 | -1.13 | 5.97E-01 | 9.38E-01 |
| SNAI3       | -0.26 | 6.22E-01 | 1.00E+00 | 0.47  | 5.97E-01 | 9.38E-01 |
| TNNC1       | 0.09  | 7.74E-01 | 1.00E+00 | -0.29 | 5.97E-01 | 9.38E-01 |
| PDZD3       | 1.73  | 1.95E-01 | 1.00E+00 | -0.88 | 5.97E-01 | 9.38E-01 |
| SPICE1      | 0.40  | 5.65E-01 | 1.00E+00 | 0.31  | 5.97E-01 | 9.38E-01 |
| TMEM167A    | 0.33  | 1.44E-01 | 1.00E+00 | -0.12 | 5.97E-01 | 9.38E-01 |
| LYPLAL1-DT  | -2.70 | 1.00E-01 | 1.00E+00 | -0.52 | 5.97E-01 | 9.38E-01 |
| CCDC152     | 0.72  | 1.87E-01 | 1.00E+00 | 0.24  | 5.97E-01 | 9.38E-01 |
| KRTAP26-1   | -5.08 | 1.21E-01 | 1.00E+00 | -1.69 | 5.97E-01 | 9.38E-01 |
| CASP8       | -0.06 | 8.81E-01 | 1.00E+00 | 0.17  | 5.97E-01 | 9.38E-01 |
| BEND4       | -1.04 | 5.07E-01 | 1.00E+00 | 0.68  | 5.97E-01 | 9.38E-01 |
| GPATCH8     | -0.24 | 2.08E-01 | 1.00E+00 | 0.14  | 5.97E-01 | 9.38E-01 |
| G37438      | -0.54 | 5.67E-01 | 1.00E+00 | -0.42 | 5.97E-01 | 9.38E-01 |
| AQP5        | -0.14 | 9.04E-01 | 1.00E+00 | -0.44 | 5.97E-01 | 9.38E-01 |
| G35531      | 1.97  | 4.07E-01 | 1.00E+00 | -0.57 | 5.98E-01 | 9.38E-01 |
| LCE6A       | 0.02  | 9.75E-01 | 1.00E+00 | 0.38  | 5.98E-01 | 9.38E-01 |
| TXNL4B      | 0.09  | 7.29E-01 | 1.00E+00 | 0.11  | 5.98E-01 | 9.38E-01 |
| LINC02303   | 0.04  | 9.91E-01 | 1.00E+00 | 1.31  | 5.98E-01 | 9.38E-01 |
| NPM1P30     | -1.52 | 6.60E-01 | 1.00E+00 | -0.64 | 5.98E-01 | 9.38E-01 |
| GABRA3      | -1.76 | 6.93E-03 | 5.08E-01 | -0.56 | 5.98E-01 | 9.38E-01 |
| AL021068.1  | 0.53  | 4.07E-01 | 1.00E+00 | 0.36  | 5.98E-01 | 9.38E-01 |
| G480        | -0.82 | 6.13E-01 | 1.00E+00 | -0.54 | 5.98E-01 | 9.38E-01 |
| AC022809.1  | 0.60  | 8.40E-01 | 1.00E+00 | 1.06  | 5.98E-01 | 9.38E-01 |
| AQP3        | -0.79 | 7.06E-02 | 1.00E+00 | -0.29 | 5.98E-01 | 9.38E-01 |
| TFEB        | -0.31 | 1.86E-01 | 1.00E+00 | 0.24  | 5.98E-01 | 9.38E-01 |
| HNRNPD      | -0.25 | 2.06E-01 | 1.00E+00 | -0.25 | 5.98E-01 | 9.38E-01 |

|                   |       |          |          |       |          |          |
|-------------------|-------|----------|----------|-------|----------|----------|
| <b>MAPK8IP1</b>   | -0.48 | 3.38E-01 | 1.00E+00 | 0.41  | 5.98E-01 | 9.38E-01 |
| <b>WDR55</b>      | 0.10  | 6.58E-01 | 1.00E+00 | -0.10 | 5.98E-01 | 9.38E-01 |
| <b>ZNF2</b>       | 0.39  | 1.93E-01 | 1.00E+00 | -0.15 | 5.98E-01 | 9.38E-01 |
| <b>SLC38A2</b>    | 0.04  | 8.90E-01 | 1.00E+00 | -0.13 | 5.98E-01 | 9.38E-01 |
| <b>LRRFIP2</b>    | -0.02 | 9.45E-01 | 1.00E+00 | 0.10  | 5.98E-01 | 9.38E-01 |
| <b>AL159169.2</b> | -0.06 | 9.86E-01 | 1.00E+00 | 0.60  | 5.98E-01 | 9.38E-01 |
| <b>TRAM1L1</b>    | -0.59 | 7.89E-02 | 1.00E+00 | 0.22  | 5.98E-01 | 9.38E-01 |
| <b>DLL4</b>       | 0.29  | 5.61E-01 | 1.00E+00 | 0.29  | 5.98E-01 | 9.38E-01 |
| <b>RPS3AP25</b>   | -1.21 | 4.79E-01 | 1.00E+00 | -0.36 | 5.98E-01 | 9.38E-01 |
| <b>NLE1</b>       | 0.14  | 6.12E-01 | 1.00E+00 | 0.22  | 5.98E-01 | 9.38E-01 |
| <b>SFRP4</b>      | 0.42  | 7.09E-01 | 1.00E+00 | 1.51  | 5.98E-01 | 9.38E-01 |
| <b>AC012676.5</b> | -1.13 | 5.45E-01 | 1.00E+00 | 0.72  | 5.98E-01 | 9.38E-01 |
| <b>UCK1</b>       | 0.16  | 4.82E-01 | 1.00E+00 | 0.15  | 5.98E-01 | 9.38E-01 |
| <b>ADCY9</b>      | -0.04 | 8.75E-01 | 1.00E+00 | 0.36  | 5.98E-01 | 9.38E-01 |
| <b>CAMKK1</b>     | -0.48 | 1.30E-01 | 1.00E+00 | -0.21 | 5.98E-01 | 9.38E-01 |
| <b>AL139022.2</b> | -0.46 | 6.33E-01 | 1.00E+00 | 0.62  | 5.98E-01 | 9.38E-01 |
| <b>HIF1AN</b>     | 0.49  | 2.93E-02 | 9.91E-01 | 0.10  | 5.98E-01 | 9.38E-01 |
| <b>SMARCE1</b>    | 0.40  | 2.36E-01 | 1.00E+00 | 0.20  | 5.99E-01 | 9.38E-01 |
| <b>TPTE2P1</b>    | 0.91  | 3.96E-01 | 1.00E+00 | 0.40  | 5.99E-01 | 9.38E-01 |
| <b>ILVBL</b>      | -0.03 | 8.88E-01 | 1.00E+00 | 0.10  | 5.99E-01 | 9.38E-01 |
| <b>GK5</b>        | 0.19  | 4.13E-01 | 1.00E+00 | -0.21 | 5.99E-01 | 9.38E-01 |
| <b>AC115989.1</b> | -0.22 | 9.37E-01 | 1.00E+00 | -1.09 | 5.99E-01 | 9.38E-01 |
| <b>AC022075.2</b> | 0.83  | 5.93E-01 | 1.00E+00 | -0.67 | 5.99E-01 | 9.38E-01 |
| <b>UEVLD</b>      | 0.04  | 8.96E-01 | 1.00E+00 | -0.09 | 5.99E-01 | 9.38E-01 |
| <b>G31307</b>     | -1.18 | 4.35E-01 | 1.00E+00 | -0.38 | 5.99E-01 | 9.38E-01 |
| <b>SCN2A</b>      | -0.36 | 7.60E-01 | 1.00E+00 | 0.46  | 5.99E-01 | 9.38E-01 |
| <b>PRR11</b>      | -0.44 | 2.89E-01 | 1.00E+00 | 0.27  | 5.99E-01 | 9.38E-01 |
| <b>ITIH5</b>      | 1.15  | 9.73E-02 | 1.00E+00 | 0.33  | 5.99E-01 | 9.38E-01 |
| <b>AC108749.1</b> | -1.53 | 4.85E-01 | 1.00E+00 | -0.66 | 5.99E-01 | 9.38E-01 |
| <b>GORAB</b>      | 0.03  | 9.38E-01 | 1.00E+00 | -0.18 | 5.99E-01 | 9.38E-01 |
| <b>CREBBP</b>     | -0.36 | 1.46E-01 | 1.00E+00 | 0.25  | 5.99E-01 | 9.38E-01 |
| <b>MDN1</b>       | 0.12  | 6.45E-01 | 1.00E+00 | 0.21  | 5.99E-01 | 9.38E-01 |

|                    |       |          |          |       |          |          |
|--------------------|-------|----------|----------|-------|----------|----------|
| <b>SLC35A2</b>     | -0.02 | 9.30E-01 | 1.00E+00 | 0.12  | 5.99E-01 | 9.38E-01 |
| <b>CCT5</b>        | -0.16 | 2.94E-01 | 1.00E+00 | 0.09  | 5.99E-01 | 9.38E-01 |
| <b>FAM222A-AS1</b> | -0.20 | 8.58E-01 | 1.00E+00 | -0.69 | 5.99E-01 | 9.38E-01 |
| <b>CLP1</b>        | -0.15 | 3.58E-01 | 1.00E+00 | 0.08  | 5.99E-01 | 9.38E-01 |
| <b>MAP6D1</b>      | -0.41 | 6.07E-01 | 1.00E+00 | 0.66  | 6.00E-01 | 9.39E-01 |
| <b>AC006453.2</b>  | -0.38 | 7.24E-01 | 1.00E+00 | 0.38  | 6.00E-01 | 9.39E-01 |
| <b>TDGF1</b>       | -0.70 | 7.15E-01 | 1.00E+00 | -0.67 | 6.00E-01 | 9.39E-01 |
| <b>INSYN2B</b>     | -0.19 | 7.93E-01 | 1.00E+00 | 0.51  | 6.00E-01 | 9.39E-01 |
| <b>TIMELESS</b>    | -0.64 | 4.09E-03 | 3.55E-01 | 0.25  | 6.00E-01 | 9.39E-01 |
| <b>AC012603.1</b>  | -3.35 | 3.92E-02 | 1.00E+00 | 0.50  | 6.00E-01 | 9.39E-01 |
| <b>MYOZ3</b>       | -0.79 | 3.22E-01 | 1.00E+00 | 0.35  | 6.00E-01 | 9.39E-01 |
| <b>SRMS</b>        | -2.69 | 9.72E-04 | 1.61E-01 | 0.62  | 6.00E-01 | 9.39E-01 |
| <b>RPSAP47</b>     | -0.16 | 8.84E-01 | 1.00E+00 | 0.39  | 6.00E-01 | 9.39E-01 |
| <b>CENPK</b>       | -0.22 | 6.20E-01 | 1.00E+00 | -0.23 | 6.00E-01 | 9.39E-01 |
| <b>BX284668.6</b>  | 0.23  | 9.46E-01 | 1.00E+00 | 0.71  | 6.00E-01 | 9.39E-01 |
| <b>DAZAP2P1</b>    | -2.02 | 4.59E-01 | 1.00E+00 | -0.42 | 6.00E-01 | 9.39E-01 |
| <b>CYP27A1</b>     | -0.11 | 7.85E-01 | 1.00E+00 | 0.23  | 6.00E-01 | 9.39E-01 |
| <b>ARRDC3-AS1</b>  | 0.57  | 3.98E-01 | 1.00E+00 | 0.24  | 6.00E-01 | 9.39E-01 |
| <b>AL078604.1</b>  | 0.13  | 9.70E-01 | 1.00E+00 | 0.45  | 6.00E-01 | 9.39E-01 |
| <b>SLC4A3</b>      | -0.53 | 4.51E-01 | 1.00E+00 | 0.40  | 6.00E-01 | 9.39E-01 |
| <b>USP10</b>       | 0.02  | 8.92E-01 | 1.00E+00 | -0.08 | 6.00E-01 | 9.39E-01 |
| <b>TRIB3</b>       | -0.09 | 7.98E-01 | 1.00E+00 | -0.15 | 6.00E-01 | 9.39E-01 |
| <b>TNNC2</b>       | 0.66  | 6.73E-02 | 1.00E+00 | -0.27 | 6.00E-01 | 9.39E-01 |
| <b>GON4L</b>       | -0.24 | 1.99E-01 | 1.00E+00 | 0.13  | 6.00E-01 | 9.39E-01 |
| <b>NTF4</b>        | -0.26 | 4.37E-01 | 1.00E+00 | -0.28 | 6.00E-01 | 9.39E-01 |
| <b>RGP1</b>        | 0.25  | 3.61E-01 | 1.00E+00 | 0.30  | 6.01E-01 | 9.39E-01 |
| <b>G36500</b>      | -2.52 | 1.39E-01 | 1.00E+00 | 0.41  | 6.01E-01 | 9.39E-01 |
| <b>TMEM165</b>     | 0.31  | 2.33E-01 | 1.00E+00 | -0.22 | 6.01E-01 | 9.39E-01 |
| <b>AC005840.4</b>  | -2.68 | 2.33E-01 | 1.00E+00 | 0.53  | 6.01E-01 | 9.39E-01 |
| <b>AGO4</b>        | 0.32  | 2.49E-01 | 1.00E+00 | -0.16 | 6.01E-01 | 9.39E-01 |
| <b>PAXIP1-AS1</b>  | 0.13  | 7.21E-01 | 1.00E+00 | 0.21  | 6.01E-01 | 9.39E-01 |
| <b>PIP4P1</b>      | -0.22 | 4.07E-01 | 1.00E+00 | -0.29 | 6.01E-01 | 9.39E-01 |

|                   |       |          |          |       |          |          |
|-------------------|-------|----------|----------|-------|----------|----------|
| <b>CXCL11</b>     | -2.11 | 3.07E-02 | 1.00E+00 | 1.64  | 6.01E-01 | 9.39E-01 |
| <b>SMIM14</b>     | 0.27  | 1.85E-01 | 1.00E+00 | -0.12 | 6.01E-01 | 9.39E-01 |
| <b>SLC35E3</b>    | -0.23 | 3.39E-01 | 1.00E+00 | 0.11  | 6.01E-01 | 9.39E-01 |
| <b>XPO7</b>       | 0.05  | 7.54E-01 | 1.00E+00 | 0.16  | 6.01E-01 | 9.39E-01 |
| <b>LINC02254</b>  | -0.68 | 8.44E-01 | 1.00E+00 | -0.95 | 6.01E-01 | 9.39E-01 |
| <b>PRPH2</b>      | 0.25  | 8.02E-01 | 1.00E+00 | -1.50 | 6.01E-01 | 9.39E-01 |
| <b>G17634</b>     | NA    | NA       | NA       | -0.95 | 6.01E-01 | 9.39E-01 |
| <b>PUM1</b>       | -0.06 | 6.97E-01 | 1.00E+00 | -0.10 | 6.01E-01 | 9.39E-01 |
| <b>TACC2</b>      | -0.15 | 5.95E-01 | 1.00E+00 | -0.15 | 6.01E-01 | 9.39E-01 |
| <b>LINC01277</b>  | -0.41 | 7.62E-01 | 1.00E+00 | -0.56 | 6.01E-01 | 9.39E-01 |
| <b>AL139120.1</b> | 0.32  | 9.28E-01 | 1.00E+00 | 0.47  | 6.01E-01 | 9.39E-01 |
| <b>CAPS</b>       | -0.07 | 8.88E-01 | 1.00E+00 | 0.26  | 6.01E-01 | 9.39E-01 |
| <b>AL590652.1</b> | -0.17 | 7.66E-01 | 1.00E+00 | -0.35 | 6.01E-01 | 9.39E-01 |
| <b>LRRC37BP1</b>  | 0.04  | 9.08E-01 | 1.00E+00 | 0.20  | 6.01E-01 | 9.39E-01 |
| <b>DDB2</b>       | -0.17 | 4.77E-01 | 1.00E+00 | 0.10  | 6.01E-01 | 9.39E-01 |
| <b>AC108062.1</b> | 0.09  | 8.85E-01 | 1.00E+00 | -0.32 | 6.02E-01 | 9.39E-01 |
| <b>FBXO15</b>     | -0.39 | 6.76E-01 | 1.00E+00 | -0.57 | 6.02E-01 | 9.39E-01 |
| <b>KXD1</b>       | -0.14 | 4.05E-01 | 1.00E+00 | 0.16  | 6.02E-01 | 9.39E-01 |
| <b>ST13P20</b>    | -0.99 | 2.66E-01 | 1.00E+00 | 0.51  | 6.02E-01 | 9.39E-01 |
| <b>MRC1</b>       | -1.08 | 3.44E-01 | 1.00E+00 | 0.48  | 6.02E-01 | 9.39E-01 |
| <b>HMGN1P38</b>   | -0.11 | 9.51E-01 | 1.00E+00 | 0.31  | 6.02E-01 | 9.39E-01 |
| <b>TNIP2</b>      | -0.14 | 5.40E-01 | 1.00E+00 | 0.29  | 6.02E-01 | 9.39E-01 |
| <b>ATG12</b>      | 0.25  | 1.86E-01 | 1.00E+00 | -0.16 | 6.02E-01 | 9.39E-01 |
| <b>AL592429.2</b> | 2.03  | 2.65E-02 | 9.49E-01 | -0.48 | 6.02E-01 | 9.39E-01 |
| <b>EMX2OS</b>     | 0.31  | 5.03E-01 | 1.00E+00 | 0.21  | 6.02E-01 | 9.39E-01 |
| <b>SNX22</b>      | -0.49 | 4.57E-01 | 1.00E+00 | 0.34  | 6.02E-01 | 9.39E-01 |
| <b>PCDHA12</b>    | 1.49  | 2.29E-01 | 1.00E+00 | -0.78 | 6.02E-01 | 9.39E-01 |
| <b>WFDC2</b>      | 0.27  | 5.13E-01 | 1.00E+00 | 0.28  | 6.02E-01 | 9.39E-01 |
| <b>GPD2</b>       | 0.09  | 7.35E-01 | 1.00E+00 | -0.13 | 6.02E-01 | 9.39E-01 |
| <b>ETV3</b>       | 0.17  | 5.76E-01 | 1.00E+00 | 0.22  | 6.02E-01 | 9.39E-01 |
| <b>RHOV</b>       | -0.21 | 5.05E-01 | 1.00E+00 | -0.28 | 6.02E-01 | 9.39E-01 |
| <b>BRIP1</b>      | -0.34 | 3.42E-01 | 1.00E+00 | 0.31  | 6.02E-01 | 9.39E-01 |



|                    |       |          |          |       |          |          |
|--------------------|-------|----------|----------|-------|----------|----------|
| <b>ERICH6-AS1</b>  | -0.28 | 7.19E-01 | 1.00E+00 | -0.28 | 6.02E-01 | 9.39E-01 |
| <b>NRM</b>         | -0.33 | 1.84E-01 | 1.00E+00 | -0.16 | 6.02E-01 | 9.39E-01 |
| <b>LINC01358</b>   | -0.46 | 6.98E-01 | 1.00E+00 | 0.31  | 6.02E-01 | 9.39E-01 |
| <b>EME1</b>        | 0.14  | 8.57E-01 | 1.00E+00 | 0.57  | 6.02E-01 | 9.39E-01 |
| <b>AC232271.1</b>  | 1.52  | 4.16E-01 | 1.00E+00 | 0.64  | 6.02E-01 | 9.39E-01 |
| <b>PDGFC</b>       | 0.36  | 1.83E-01 | 1.00E+00 | 0.12  | 6.02E-01 | 9.39E-01 |
| <b>AP001055.1</b>  | -1.38 | 1.77E-01 | 1.00E+00 | 0.48  | 6.02E-01 | 9.39E-01 |
| <b>XLOC_008164</b> | -2.02 | 6.40E-02 | 1.00E+00 | 0.58  | 6.03E-01 | 9.39E-01 |
| <b>PDE1A</b>       | -0.10 | 8.45E-01 | 1.00E+00 | 0.33  | 6.03E-01 | 9.39E-01 |
| <b>ZMYM2</b>       | 0.04  | 8.72E-01 | 1.00E+00 | 0.11  | 6.03E-01 | 9.39E-01 |
| <b>EIF4E2</b>      | -0.01 | 9.37E-01 | 1.00E+00 | 0.08  | 6.03E-01 | 9.39E-01 |
| <b>G7721</b>       | -0.57 | 8.28E-01 | 1.00E+00 | -1.53 | 6.03E-01 | 9.39E-01 |
| <b>NFIC</b>        | -0.31 | 3.04E-01 | 1.00E+00 | 0.18  | 6.03E-01 | 9.39E-01 |
| <b>OCIAD2</b>      | -0.32 | 1.16E-01 | 1.00E+00 | -0.20 | 6.03E-01 | 9.39E-01 |
| <b>HEXA</b>        | 0.37  | 3.77E-01 | 1.00E+00 | 0.19  | 6.03E-01 | 9.39E-01 |
| <b>LINC00158</b>   | -2.79 | 4.12E-01 | 1.00E+00 | 0.90  | 6.03E-01 | 9.39E-01 |
| <b>EIF2B1</b>      | -0.17 | 3.86E-01 | 1.00E+00 | -0.11 | 6.03E-01 | 9.39E-01 |
| <b>RERG</b>        | 0.13  | 7.12E-01 | 1.00E+00 | -0.18 | 6.03E-01 | 9.39E-01 |
| <b>AC109460.2</b>  | 2.46  | 2.60E-01 | 1.00E+00 | -0.93 | 6.03E-01 | 9.39E-01 |
| <b>MKX</b>         | 0.12  | 8.78E-01 | 1.00E+00 | 0.95  | 6.03E-01 | 9.39E-01 |
| <b>SMAP2</b>       | -0.01 | 9.84E-01 | 1.00E+00 | 0.30  | 6.03E-01 | 9.39E-01 |
| <b>CBX7</b>        | 0.32  | 2.87E-01 | 1.00E+00 | -0.22 | 6.03E-01 | 9.39E-01 |
| <b>GOLGA1</b>      | -0.26 | 2.75E-01 | 1.00E+00 | 0.14  | 6.03E-01 | 9.39E-01 |
| <b>RAB3GAP2</b>    | 0.15  | 5.09E-01 | 1.00E+00 | 0.11  | 6.03E-01 | 9.40E-01 |
| <b>SSTR2</b>       | -0.98 | 7.60E-02 | 1.00E+00 | 0.37  | 6.03E-01 | 9.40E-01 |
| <b>XLOC_009060</b> | 0.52  | 8.79E-01 | 1.00E+00 | 0.64  | 6.03E-01 | 9.40E-01 |
| <b>ACTR8</b>       | -0.18 | 4.43E-01 | 1.00E+00 | 0.08  | 6.04E-01 | 9.40E-01 |
| <b>TMEM209</b>     | 0.21  | 2.57E-01 | 1.00E+00 | -0.17 | 6.04E-01 | 9.40E-01 |
| <b>AP006222.2</b>  | -0.12 | 8.01E-01 | 1.00E+00 | -0.22 | 6.04E-01 | 9.40E-01 |
| <b>ANK2</b>        | 0.33  | 3.99E-01 | 1.00E+00 | 0.25  | 6.04E-01 | 9.40E-01 |
| <b>IDO1</b>        | -0.31 | 7.18E-01 | 1.00E+00 | 1.63  | 6.04E-01 | 9.40E-01 |
| <b>G32333</b>      | 0.32  | 6.21E-01 | 1.00E+00 | 0.50  | 6.04E-01 | 9.40E-01 |

|                   |       |          |          |       |          |          |
|-------------------|-------|----------|----------|-------|----------|----------|
| <b>G37465</b>     | -0.67 | 4.02E-01 | 1.00E+00 | 0.55  | 6.04E-01 | 9.40E-01 |
| <b>AL512646.1</b> | NA    | NA       | NA       | -1.63 | 6.04E-01 | 9.40E-01 |
| <b>PLXNA3</b>     | -0.26 | 3.02E-01 | 1.00E+00 | 0.27  | 6.04E-01 | 9.40E-01 |
| <b>ASB16</b>      | -1.41 | 6.75E-02 | 1.00E+00 | -0.62 | 6.04E-01 | 9.40E-01 |
| <b>BX470102.1</b> | 1.07  | 1.73E-01 | 1.00E+00 | 0.37  | 6.04E-01 | 9.40E-01 |
| <b>PYGM</b>       | -0.55 | 3.68E-01 | 1.00E+00 | -1.04 | 6.04E-01 | 9.40E-01 |
| <b>RNF152</b>     | -0.08 | 8.53E-01 | 1.00E+00 | -0.25 | 6.04E-01 | 9.40E-01 |
| <b>P2RY1</b>      | -0.11 | 8.12E-01 | 1.00E+00 | -0.24 | 6.04E-01 | 9.40E-01 |
| <b>CTNNA1</b>     | -0.18 | 2.63E-01 | 1.00E+00 | 0.11  | 6.04E-01 | 9.40E-01 |
| <b>FARSA</b>      | -0.03 | 8.76E-01 | 1.00E+00 | 0.11  | 6.04E-01 | 9.40E-01 |
| <b>MUS81</b>      | -0.22 | 4.22E-01 | 1.00E+00 | 0.15  | 6.04E-01 | 9.40E-01 |
| <b>CCDC113</b>    | -0.11 | 6.30E-01 | 1.00E+00 | 0.13  | 6.04E-01 | 9.40E-01 |
| <b>WBP4</b>       | 0.28  | 1.33E-01 | 1.00E+00 | -0.11 | 6.04E-01 | 9.40E-01 |
| <b>RHOT2</b>      | -0.20 | 2.71E-01 | 1.00E+00 | 0.12  | 6.04E-01 | 9.40E-01 |
| <b>FBXO11</b>     | -0.23 | 1.10E-01 | 1.00E+00 | 0.20  | 6.04E-01 | 9.40E-01 |
| <b>CCDC134</b>    | 0.22  | 5.71E-01 | 1.00E+00 | -0.21 | 6.04E-01 | 9.40E-01 |
| <b>AC012313.2</b> | 0.78  | 4.68E-01 | 1.00E+00 | -0.60 | 6.04E-01 | 9.40E-01 |
| <b>FAM66A</b>     | -1.78 | 4.67E-02 | 1.00E+00 | -0.74 | 6.05E-01 | 9.40E-01 |
| <b>TWISTNB</b>    | -0.03 | 8.58E-01 | 1.00E+00 | -0.12 | 6.05E-01 | 9.40E-01 |
| <b>BX571846.1</b> | 3.14  | 8.52E-02 | 1.00E+00 | 0.61  | 6.05E-01 | 9.40E-01 |
| <b>AL512274.1</b> | 0.39  | 2.37E-01 | 1.00E+00 | 0.26  | 6.05E-01 | 9.40E-01 |
| <b>NAALADL1</b>   | 0.06  | 8.78E-01 | 1.00E+00 | 0.15  | 6.05E-01 | 9.40E-01 |
| <b>GPR143</b>     | 0.07  | 8.69E-01 | 1.00E+00 | 0.24  | 6.05E-01 | 9.40E-01 |
| <b>AC024451.2</b> | -2.02 | 3.11E-01 | 1.00E+00 | 0.64  | 6.05E-01 | 9.40E-01 |
| <b>AC016734.1</b> | -2.33 | 1.27E-01 | 1.00E+00 | -0.26 | 6.05E-01 | 9.40E-01 |
| <b>DLG1-AS1</b>   | -0.36 | 8.33E-01 | 1.00E+00 | -0.58 | 6.05E-01 | 9.40E-01 |
| <b>AL133330.1</b> | -1.55 | 4.06E-01 | 1.00E+00 | -0.51 | 6.05E-01 | 9.40E-01 |
| <b>FAM71F2</b>    | -0.02 | 9.88E-01 | 1.00E+00 | 0.63  | 6.05E-01 | 9.40E-01 |
| <b>DIAPH3</b>     | -0.17 | 6.91E-01 | 1.00E+00 | 0.23  | 6.05E-01 | 9.40E-01 |
| <b>RBM19</b>      | -0.25 | 2.72E-01 | 1.00E+00 | 0.17  | 6.05E-01 | 9.40E-01 |
| <b>OSR2</b>       | 1.11  | 1.84E-02 | 8.51E-01 | 0.28  | 6.05E-01 | 9.40E-01 |
| <b>MKRN2</b>      | 0.04  | 8.69E-01 | 1.00E+00 | -0.10 | 6.05E-01 | 9.40E-01 |

|                     |       |          |          |       |          |          |
|---------------------|-------|----------|----------|-------|----------|----------|
| <b>MRE11</b>        | 0.03  | 9.14E-01 | 1.00E+00 | -0.10 | 6.05E-01 | 9.40E-01 |
| <b>TMCO1</b>        | 0.13  | 4.17E-01 | 1.00E+00 | -0.12 | 6.05E-01 | 9.40E-01 |
| <b>NOS1AP</b>       | -0.05 | 9.21E-01 | 1.00E+00 | -0.30 | 6.05E-01 | 9.40E-01 |
| <b>FAM86B2</b>      | -2.47 | 3.07E-02 | 1.00E+00 | -0.39 | 6.05E-01 | 9.40E-01 |
| <b>ARMC2</b>        | -0.20 | 6.06E-01 | 1.00E+00 | -0.19 | 6.05E-01 | 9.40E-01 |
| <b>NOL9</b>         | 0.09  | 7.83E-01 | 1.00E+00 | -0.16 | 6.05E-01 | 9.40E-01 |
| <b>C17orf67</b>     | -0.80 | 1.45E-01 | 1.00E+00 | 0.37  | 6.05E-01 | 9.40E-01 |
| <b>PIAS3</b>        | -0.47 | 1.57E-01 | 1.00E+00 | 0.16  | 6.05E-01 | 9.40E-01 |
| <b>CHP2</b>         | 0.34  | 4.04E-01 | 1.00E+00 | -0.47 | 6.06E-01 | 9.40E-01 |
| <b>ADRB1</b>        | -0.08 | 8.96E-01 | 1.00E+00 | 0.32  | 6.06E-01 | 9.40E-01 |
| <b>XLOC_001097</b>  | 0.25  | 9.42E-01 | 1.00E+00 | -0.62 | 6.06E-01 | 9.40E-01 |
| <b>DCTD</b>         | 0.07  | 6.77E-01 | 1.00E+00 | 0.08  | 6.06E-01 | 9.40E-01 |
| <b>2-Mar</b>        | -0.17 | 5.26E-01 | 1.00E+00 | -0.32 | 6.06E-01 | 9.40E-01 |
| <b>STMND1</b>       | 1.11  | 3.76E-01 | 1.00E+00 | -0.76 | 6.06E-01 | 9.40E-01 |
| <b>RAB27B</b>       | 0.04  | 9.17E-01 | 1.00E+00 | 0.25  | 6.06E-01 | 9.40E-01 |
| <b>METTL23</b>      | 0.11  | 6.16E-01 | 1.00E+00 | -0.15 | 6.06E-01 | 9.40E-01 |
| <b>RP11-353N4.4</b> | 0.02  | 9.88E-01 | 1.00E+00 | 0.35  | 6.06E-01 | 9.40E-01 |
| <b>AC083906.5</b>   | -4.49 | 5.63E-03 | 4.46E-01 | -0.52 | 6.06E-01 | 9.40E-01 |
| <b>MORC2</b>        | 0.02  | 9.32E-01 | 1.00E+00 | 0.32  | 6.06E-01 | 9.40E-01 |
| <b>AC073107.1</b>   | -0.47 | 2.88E-01 | 1.00E+00 | 0.19  | 6.06E-01 | 9.40E-01 |
| <b>MORC2-AS1</b>    | -2.10 | 4.84E-01 | 1.00E+00 | 0.53  | 6.06E-01 | 9.40E-01 |
| <b>C12orf49</b>     | 0.39  | 8.31E-02 | 1.00E+00 | 0.19  | 6.06E-01 | 9.40E-01 |
| <b>H3F3BP1</b>      | -0.30 | 9.31E-01 | 1.00E+00 | -0.35 | 6.06E-01 | 9.40E-01 |
| <b>TFAP2A-AS1</b>   | -0.55 | 5.67E-01 | 1.00E+00 | 0.33  | 6.06E-01 | 9.40E-01 |
| <b>AC093110.1</b>   | 0.33  | 7.88E-01 | 1.00E+00 | 0.52  | 6.06E-01 | 9.40E-01 |
| <b>AC090607.2</b>   | 0.61  | 8.57E-01 | 1.00E+00 | 0.60  | 6.07E-01 | 9.40E-01 |
| <b>C11orf74</b>     | 0.50  | 1.31E-01 | 1.00E+00 | -0.16 | 6.07E-01 | 9.40E-01 |
| <b>MARK2</b>        | -0.08 | 7.78E-01 | 1.00E+00 | -0.31 | 6.07E-01 | 9.40E-01 |
| <b>MTR</b>          | 0.31  | 3.70E-01 | 1.00E+00 | 0.16  | 6.07E-01 | 9.40E-01 |
| <b>BICRAL</b>       | -0.07 | 7.22E-01 | 1.00E+00 | 0.18  | 6.07E-01 | 9.40E-01 |
| <b>CAPN6</b>        | -0.03 | 9.62E-01 | 1.00E+00 | 0.39  | 6.07E-01 | 9.40E-01 |
| <b>AL451164.1</b>   | 0.03  | 9.89E-01 | 1.00E+00 | 0.69  | 6.07E-01 | 9.40E-01 |

|                   |       |          |          |       |          |          |
|-------------------|-------|----------|----------|-------|----------|----------|
| <b>DUOX1</b>      | -0.16 | 7.02E-01 | 1.00E+00 | 0.34  | 6.07E-01 | 9.40E-01 |
| <b>AP001208.2</b> | -0.01 | 9.96E-01 | 1.00E+00 | -0.47 | 6.07E-01 | 9.40E-01 |
| <b>G39661</b>     | 1.27  | 2.82E-01 | 1.00E+00 | 0.44  | 6.07E-01 | 9.40E-01 |
| <b>AL031291.1</b> | -0.32 | 7.57E-01 | 1.00E+00 | 0.78  | 6.07E-01 | 9.40E-01 |
| <b>PGAP1</b>      | 0.24  | 3.79E-01 | 1.00E+00 | -0.20 | 6.07E-01 | 9.40E-01 |
| <b>SVOPL</b>      | -0.82 | 4.78E-01 | 1.00E+00 | -0.47 | 6.07E-01 | 9.40E-01 |
| <b>AC023157.3</b> | 0.18  | 6.45E-01 | 1.00E+00 | 0.16  | 6.07E-01 | 9.40E-01 |
| <b>CDKL3</b>      | -1.77 | 1.79E-01 | 1.00E+00 | 0.31  | 6.07E-01 | 9.40E-01 |
| <b>TP53BP2</b>    | -0.08 | 7.25E-01 | 1.00E+00 | 0.22  | 6.07E-01 | 9.40E-01 |
| <b>UNC119B</b>    | 0.73  | 1.55E-01 | 1.00E+00 | 0.23  | 6.07E-01 | 9.40E-01 |
| <b>AC138866.1</b> | -3.32 | 2.05E-02 | 8.94E-01 | 0.28  | 6.07E-01 | 9.40E-01 |
| <b>CCL24</b>      | 0.09  | 9.36E-01 | 1.00E+00 | -0.37 | 6.07E-01 | 9.40E-01 |
| <b>KIAA0556</b>   | -0.29 | 2.45E-01 | 1.00E+00 | 0.28  | 6.07E-01 | 9.40E-01 |
| <b>GRK2</b>       | 0.03  | 8.90E-01 | 1.00E+00 | 0.31  | 6.07E-01 | 9.40E-01 |
| <b>PAFAH1B3</b>   | -0.30 | 1.96E-01 | 1.00E+00 | -0.13 | 6.07E-01 | 9.40E-01 |
| <b>IFT81</b>      | 0.26  | 3.83E-01 | 1.00E+00 | 0.13  | 6.07E-01 | 9.41E-01 |
| <b>FAM222A</b>    | -0.21 | 5.64E-01 | 1.00E+00 | -0.34 | 6.07E-01 | 9.41E-01 |
| <b>MIR9-3HG</b>   | -0.88 | 1.33E-01 | 1.00E+00 | 0.59  | 6.08E-01 | 9.41E-01 |
| <b>PEBP1P2</b>    | 1.17  | 5.30E-01 | 1.00E+00 | -0.30 | 6.08E-01 | 9.41E-01 |
| <b>AC022150.4</b> | 0.65  | 1.50E-01 | 1.00E+00 | -0.30 | 6.08E-01 | 9.41E-01 |
| <b>YY1AP1</b>     | -0.34 | 3.27E-02 | 1.00E+00 | 0.10  | 6.08E-01 | 9.41E-01 |
| <b>TOMM22</b>     | -0.02 | 9.10E-01 | 1.00E+00 | -0.08 | 6.08E-01 | 9.41E-01 |
| <b>KCNU1</b>      | -1.61 | 6.32E-01 | 1.00E+00 | 0.73  | 6.08E-01 | 9.41E-01 |
| <b>CSTA</b>       | -0.02 | 9.62E-01 | 1.00E+00 | 0.26  | 6.08E-01 | 9.41E-01 |
| <b>PAXIP1</b>     | -0.21 | 4.24E-01 | 1.00E+00 | 0.18  | 6.08E-01 | 9.41E-01 |
| <b>AC018553.2</b> | 0.60  | 2.99E-01 | 1.00E+00 | 0.36  | 6.08E-01 | 9.41E-01 |
| <b>UBQLN1</b>     | 0.13  | 5.36E-01 | 1.00E+00 | -0.12 | 6.08E-01 | 9.41E-01 |
| <b>FCGR3B</b>     | -0.29 | 7.21E-01 | 1.00E+00 | -0.27 | 6.08E-01 | 9.41E-01 |
| <b>TRAV5</b>      | 0.78  | 7.32E-01 | 1.00E+00 | 0.78  | 6.08E-01 | 9.41E-01 |
| <b>AC025164.1</b> | -0.31 | 4.60E-01 | 1.00E+00 | -0.29 | 6.08E-01 | 9.41E-01 |
| <b>EMG1</b>       | 0.25  | 2.48E-01 | 1.00E+00 | -0.15 | 6.08E-01 | 9.41E-01 |
| <b>AC022898.1</b> | 2.62  | 4.41E-01 | 1.00E+00 | -0.87 | 6.08E-01 | 9.41E-01 |

|             |       |          |          |       |          |          |
|-------------|-------|----------|----------|-------|----------|----------|
| ADORA1      | 0.66  | 5.70E-01 | 1.00E+00 | -1.61 | 6.08E-01 | 9.41E-01 |
| XLOC_009221 | -0.29 | 9.32E-01 | 1.00E+00 | 0.83  | 6.08E-01 | 9.41E-01 |
| OGA         | 0.00  | 9.98E-01 | 1.00E+00 | -0.15 | 6.08E-01 | 9.41E-01 |
| FABP5P3     | 1.08  | 7.53E-01 | 1.00E+00 | -0.30 | 6.08E-01 | 9.41E-01 |
| G28383      | 3.75  | 1.18E-01 | 1.00E+00 | -0.54 | 6.08E-01 | 9.41E-01 |
| AC005920.1  | 0.70  | 6.23E-01 | 1.00E+00 | 0.51  | 6.08E-01 | 9.41E-01 |
| AP000692.2  | 0.95  | 3.51E-01 | 1.00E+00 | -0.36 | 6.08E-01 | 9.41E-01 |
| AL137918.1  | 1.19  | 6.74E-01 | 1.00E+00 | -0.88 | 6.08E-01 | 9.41E-01 |
| PREP        | 0.08  | 7.80E-01 | 1.00E+00 | -0.15 | 6.08E-01 | 9.41E-01 |
| MCM9        | -0.37 | 2.21E-01 | 1.00E+00 | 0.16  | 6.09E-01 | 9.41E-01 |
| MTHFSD      | 0.07  | 7.72E-01 | 1.00E+00 | -0.12 | 6.09E-01 | 9.41E-01 |
| AC011997.1  | -0.29 | 9.01E-01 | 1.00E+00 | 0.63  | 6.09E-01 | 9.41E-01 |
| XLOC_010292 | -0.72 | 3.49E-01 | 1.00E+00 | 0.42  | 6.09E-01 | 9.41E-01 |
| TIMM8AP1    | -1.86 | 2.12E-01 | 1.00E+00 | 0.39  | 6.09E-01 | 9.41E-01 |
| AL138921.2  | 0.59  | 5.67E-01 | 1.00E+00 | -0.47 | 6.09E-01 | 9.41E-01 |
| CAD         | -0.17 | 5.50E-01 | 1.00E+00 | 0.27  | 6.09E-01 | 9.41E-01 |
| RFNG        | -0.10 | 7.05E-01 | 1.00E+00 | 0.22  | 6.09E-01 | 9.41E-01 |
| TNFRSF11B   | -0.32 | 5.04E-01 | 1.00E+00 | -0.39 | 6.09E-01 | 9.41E-01 |
| TMED3       | -0.20 | 4.05E-01 | 1.00E+00 | 0.14  | 6.09E-01 | 9.41E-01 |
| BUB1B       | -0.26 | 4.82E-01 | 1.00E+00 | -0.36 | 6.09E-01 | 9.41E-01 |
| PAQR6       | -0.49 | 4.53E-01 | 1.00E+00 | 0.41  | 6.09E-01 | 9.41E-01 |
| OPA1        | 0.13  | 3.93E-01 | 1.00E+00 | -0.07 | 6.09E-01 | 9.41E-01 |
| KIR2DL3     | -2.11 | 5.36E-01 | 1.00E+00 | -0.83 | 6.09E-01 | 9.41E-01 |
| KDM7A       | 0.42  | 2.60E-01 | 1.00E+00 | 0.21  | 6.09E-01 | 9.41E-01 |
| DBNDD2      | -0.15 | 7.60E-01 | 1.00E+00 | 0.27  | 6.09E-01 | 9.41E-01 |
| FASTKD2     | -0.05 | 7.91E-01 | 1.00E+00 | -0.14 | 6.09E-01 | 9.41E-01 |
| HNRNPA1P21  | 0.19  | 8.75E-01 | 1.00E+00 | 0.71  | 6.09E-01 | 9.41E-01 |
| TBC1D8B     | 0.26  | 6.39E-01 | 1.00E+00 | -0.15 | 6.09E-01 | 9.41E-01 |
| CDIPTOSP    | -2.16 | 3.44E-01 | 1.00E+00 | -0.73 | 6.09E-01 | 9.41E-01 |
| AL132656.4  | 0.21  | 5.27E-01 | 1.00E+00 | 0.27  | 6.09E-01 | 9.41E-01 |
| AC110373.1  | -0.29 | 7.44E-01 | 1.00E+00 | -0.64 | 6.10E-01 | 9.41E-01 |
| SELENOW     | 0.19  | 2.27E-01 | 1.00E+00 | -0.14 | 6.10E-01 | 9.42E-01 |

|              |        |          |          |       |          |          |
|--------------|--------|----------|----------|-------|----------|----------|
| CHDH         | 0.03   | 9.67E-01 | 1.00E+00 | -0.25 | 6.10E-01 | 9.42E-01 |
| AC008760.2   | -0.05  | 9.74E-01 | 1.00E+00 | 1.47  | 6.10E-01 | 9.42E-01 |
| SNAP23       | 0.28   | 2.77E-01 | 1.00E+00 | 0.15  | 6.10E-01 | 9.42E-01 |
| TMEM246      | 0.15   | 6.19E-01 | 1.00E+00 | -0.16 | 6.10E-01 | 9.42E-01 |
| TMEM201      | -0.23  | 2.80E-01 | 1.00E+00 | 0.24  | 6.10E-01 | 9.42E-01 |
| AC083949.1   | -0.38  | 9.11E-01 | 1.00E+00 | 0.79  | 6.10E-01 | 9.42E-01 |
| AC026124.2   | -3.06  | 4.83E-02 | 1.00E+00 | 0.46  | 6.10E-01 | 9.42E-01 |
| KRTAP3-3     | -23.49 | 6.16E-12 | 4.05E-09 | -1.63 | 6.10E-01 | 9.42E-01 |
| XLOC_002455  | -1.03  | 3.42E-01 | 1.00E+00 | 0.58  | 6.11E-01 | 9.42E-01 |
| NISCH        | -0.24  | 3.29E-01 | 1.00E+00 | 0.18  | 6.11E-01 | 9.42E-01 |
| AC022075.1   | 0.27   | 6.88E-01 | 1.00E+00 | 0.30  | 6.11E-01 | 9.42E-01 |
| KBTBD7       | 0.31   | 2.07E-01 | 1.00E+00 | -0.12 | 6.11E-01 | 9.42E-01 |
| SOCS6        | -0.12  | 6.26E-01 | 1.00E+00 | 0.11  | 6.11E-01 | 9.42E-01 |
| SF1          | -0.29  | 1.64E-01 | 1.00E+00 | 0.21  | 6.11E-01 | 9.42E-01 |
| PDCD7        | 0.03   | 8.22E-01 | 1.00E+00 | 0.17  | 6.11E-01 | 9.42E-01 |
| XLOC_008357  | -1.29  | 1.75E-01 | 1.00E+00 | 0.34  | 6.11E-01 | 9.42E-01 |
| GUSBP2       | -0.35  | 7.15E-01 | 1.00E+00 | -0.39 | 6.11E-01 | 9.42E-01 |
| EPB41L4A-AS1 | -0.21  | 5.12E-01 | 1.00E+00 | 0.17  | 6.11E-01 | 9.42E-01 |
| FAM219B      | 0.15   | 5.85E-01 | 1.00E+00 | -0.20 | 6.11E-01 | 9.42E-01 |
| COPB2        | 0.05   | 7.95E-01 | 1.00E+00 | 0.10  | 6.11E-01 | 9.42E-01 |
| CCT6A        | -0.10  | 6.08E-01 | 1.00E+00 | 0.07  | 6.11E-01 | 9.42E-01 |
| MPDZ         | 0.52   | 1.92E-01 | 1.00E+00 | 0.27  | 6.11E-01 | 9.42E-01 |
| G35852       | -1.94  | 5.71E-01 | 1.00E+00 | -1.16 | 6.11E-01 | 9.42E-01 |
| VEGFC        | 0.56   | 1.82E-01 | 1.00E+00 | 0.34  | 6.11E-01 | 9.42E-01 |
| AC027031.2   | 0.25   | 6.93E-01 | 1.00E+00 | -0.39 | 6.11E-01 | 9.42E-01 |
| RFLNB        | -0.20  | 6.91E-01 | 1.00E+00 | -0.27 | 6.11E-01 | 9.42E-01 |
| CAPN12       | 0.61   | 3.54E-01 | 1.00E+00 | -0.42 | 6.11E-01 | 9.42E-01 |
| AP001922.6   | 2.38   | 2.33E-02 | 9.15E-01 | 0.57  | 6.11E-01 | 9.42E-01 |
| VNN3         | NA     | NA       | NA       | 1.61  | 6.11E-01 | 9.42E-01 |
| RBBP4P1      | 0.33   | 8.76E-01 | 1.00E+00 | 0.30  | 6.11E-01 | 9.42E-01 |
| ROCK1P1      | -0.19  | 8.70E-01 | 1.00E+00 | -0.39 | 6.11E-01 | 9.42E-01 |
| FBXL17       | -0.03  | 8.87E-01 | 1.00E+00 | 0.23  | 6.11E-01 | 9.42E-01 |

|                   |       |          |          |       |          |          |
|-------------------|-------|----------|----------|-------|----------|----------|
| <b>AC004918.3</b> | 0.36  | 6.92E-01 | 1.00E+00 | -0.53 | 6.11E-01 | 9.42E-01 |
| <b>HINT2</b>      | -0.71 | 8.37E-01 | 1.00E+00 | -0.31 | 6.11E-01 | 9.42E-01 |
| <b>PLCL1</b>      | -0.15 | 7.55E-01 | 1.00E+00 | 0.31  | 6.11E-01 | 9.42E-01 |
| <b>INPP5B</b>     | 0.06  | 7.57E-01 | 1.00E+00 | 0.17  | 6.12E-01 | 9.42E-01 |
| <b>AK8</b>        | -0.45 | 3.01E-01 | 1.00E+00 | -0.23 | 6.12E-01 | 9.42E-01 |
| <b>CRTC2</b>      | -0.20 | 3.66E-01 | 1.00E+00 | 0.24  | 6.12E-01 | 9.42E-01 |
| <b>C17orf75</b>   | 0.12  | 6.39E-01 | 1.00E+00 | 0.11  | 6.12E-01 | 9.42E-01 |
| <b>IL10RB-DT</b>  | 0.26  | 7.75E-01 | 1.00E+00 | 0.43  | 6.12E-01 | 9.42E-01 |
| <b>PIGC</b>       | 0.12  | 6.36E-01 | 1.00E+00 | -0.12 | 6.12E-01 | 9.42E-01 |
| <b>KRT18P34</b>   | 1.26  | 4.43E-01 | 1.00E+00 | 0.47  | 6.12E-01 | 9.42E-01 |
| <b>NBPF14</b>     | -0.89 | 2.61E-01 | 1.00E+00 | -0.24 | 6.12E-01 | 9.42E-01 |
| <b>FAM131B</b>    | 0.09  | 9.00E-01 | 1.00E+00 | 0.50  | 6.12E-01 | 9.42E-01 |
| <b>AC005593.1</b> | -2.21 | 2.63E-01 | 1.00E+00 | -0.60 | 6.12E-01 | 9.42E-01 |
| <b>CTTNBP2</b>    | 0.26  | 4.89E-01 | 1.00E+00 | 0.22  | 6.12E-01 | 9.42E-01 |
| <b>AC004540.1</b> | -0.25 | 7.15E-01 | 1.00E+00 | -0.31 | 6.12E-01 | 9.43E-01 |
| <b>ZBTB7C</b>     | -0.32 | 1.47E-01 | 1.00E+00 | -0.26 | 6.12E-01 | 9.43E-01 |
| <b>DMTF1</b>      | -0.03 | 9.05E-01 | 1.00E+00 | -0.17 | 6.12E-01 | 9.43E-01 |
| <b>GRP</b>        | -2.81 | 5.97E-02 | 1.00E+00 | 0.63  | 6.12E-01 | 9.43E-01 |
| <b>KMT2E-AS1</b>  | -0.14 | 7.12E-01 | 1.00E+00 | 0.13  | 6.12E-01 | 9.43E-01 |
| <b>LINC01012</b>  | -0.67 | 6.97E-01 | 1.00E+00 | 0.56  | 6.13E-01 | 9.43E-01 |
| <b>PCDH1</b>      | -0.25 | 2.83E-01 | 1.00E+00 | 0.20  | 6.13E-01 | 9.43E-01 |
| <b>EOGT</b>       | 0.32  | 2.66E-01 | 1.00E+00 | 0.18  | 6.13E-01 | 9.43E-01 |
| <b>AF131216.1</b> | 2.18  | 4.02E-01 | 1.00E+00 | -0.52 | 6.13E-01 | 9.43E-01 |
| <b>AC046185.2</b> | -0.16 | 8.06E-01 | 1.00E+00 | -0.26 | 6.13E-01 | 9.43E-01 |
| <b>GRPEL1</b>     | -0.07 | 7.42E-01 | 1.00E+00 | 0.13  | 6.13E-01 | 9.43E-01 |
| <b>CHRNA5</b>     | -1.36 | 2.00E-01 | 1.00E+00 | -0.39 | 6.13E-01 | 9.43E-01 |
| <b>PIGT</b>       | -0.04 | 8.68E-01 | 1.00E+00 | 0.11  | 6.13E-01 | 9.43E-01 |
| <b>FAM122C</b>    | -0.27 | 4.42E-01 | 1.00E+00 | -0.21 | 6.13E-01 | 9.43E-01 |
| <b>ERCC6</b>      | -0.11 | 7.16E-01 | 1.00E+00 | 0.13  | 6.13E-01 | 9.43E-01 |
| <b>HSF2BP</b>     | -0.32 | 7.30E-01 | 1.00E+00 | -0.32 | 6.13E-01 | 9.43E-01 |
| <b>DNASE2B</b>    | -2.04 | 5.54E-01 | 1.00E+00 | -1.10 | 6.13E-01 | 9.43E-01 |
| <b>DGCR11</b>     | 0.12  | 7.65E-01 | 1.00E+00 | 0.33  | 6.13E-01 | 9.43E-01 |

|             |        |          |          |       |          |          |
|-------------|--------|----------|----------|-------|----------|----------|
| PCDH8       | -2.76  | 3.42E-03 | 3.13E-01 | 0.68  | 6.13E-01 | 9.43E-01 |
| RIOX2       | -0.09  | 7.22E-01 | 1.00E+00 | 0.10  | 6.13E-01 | 9.43E-01 |
| PABPC5      | 0.28   | 6.10E-01 | 1.00E+00 | -0.43 | 6.13E-01 | 9.43E-01 |
| WWC1        | -0.10  | 6.40E-01 | 1.00E+00 | 0.25  | 6.13E-01 | 9.43E-01 |
| MYPN        | -3.64  | 8.75E-02 | 1.00E+00 | 0.78  | 6.13E-01 | 9.43E-01 |
| VIM-AS1     | 0.00   | 9.96E-01 | 1.00E+00 | -0.28 | 6.13E-01 | 9.43E-01 |
| AC092821.3  | -1.93  | 5.07E-01 | 1.00E+00 | -0.66 | 6.14E-01 | 9.43E-01 |
| LRPPRC      | 0.21   | 4.79E-01 | 1.00E+00 | 0.08  | 6.14E-01 | 9.43E-01 |
| AL033519.2  | 0.36   | 7.46E-01 | 1.00E+00 | -0.36 | 6.14E-01 | 9.43E-01 |
| RHBDF2      | -0.20  | 6.33E-01 | 1.00E+00 | 0.36  | 6.14E-01 | 9.43E-01 |
| HIRIP3      | 0.04   | 8.28E-01 | 1.00E+00 | 0.09  | 6.14E-01 | 9.43E-01 |
| SYT6        | -1.29  | 2.00E-01 | 1.00E+00 | -0.52 | 6.14E-01 | 9.43E-01 |
| ITLN1       | -3.18  | 3.22E-01 | 1.00E+00 | 0.89  | 6.14E-01 | 9.43E-01 |
| NUP107      | 0.10   | 7.59E-01 | 1.00E+00 | -0.14 | 6.14E-01 | 9.43E-01 |
| ZNF205      | -0.17  | 6.01E-01 | 1.00E+00 | 0.45  | 6.14E-01 | 9.43E-01 |
| NDUFV2      | 0.81   | 8.05E-01 | 1.00E+00 | 0.27  | 6.14E-01 | 9.43E-01 |
| NUDT9P1     | -3.44  | 3.54E-02 | 1.00E+00 | 0.65  | 6.14E-01 | 9.43E-01 |
| IFT52       | 0.19   | 3.47E-01 | 1.00E+00 | -0.11 | 6.14E-01 | 9.43E-01 |
| AC006504.5  | 0.43   | 2.35E-01 | 1.00E+00 | -0.16 | 6.14E-01 | 9.43E-01 |
| WASHC2A     | -0.62  | 7.31E-02 | 1.00E+00 | 0.19  | 6.14E-01 | 9.43E-01 |
| AC073111.5  | -0.15  | 6.52E-01 | 1.00E+00 | 0.13  | 6.14E-01 | 9.43E-01 |
| ADGRF4      | 0.63   | 2.36E-01 | 1.00E+00 | 0.38  | 6.14E-01 | 9.43E-01 |
| AC048346.1  | NA     | NA       | NA       | 1.59  | 6.14E-01 | 9.43E-01 |
| GPNMB       | 0.02   | 9.35E-01 | 1.00E+00 | 0.13  | 6.14E-01 | 9.43E-01 |
| AC007639.1  | -2.19  | 5.23E-01 | 1.00E+00 | -0.69 | 6.14E-01 | 9.43E-01 |
| PPP1R8      | -0.09  | 5.92E-01 | 1.00E+00 | 0.11  | 6.15E-01 | 9.43E-01 |
| RPL12P17    | 1.15   | 7.38E-01 | 1.00E+00 | -0.36 | 6.15E-01 | 9.43E-01 |
| LINC02437   | -0.80  | 8.27E-02 | 1.00E+00 | -0.28 | 6.15E-01 | 9.43E-01 |
| PKD1L1      | 0.21   | 8.17E-01 | 1.00E+00 | 0.54  | 6.15E-01 | 9.43E-01 |
| LINC02195   | -1.78  | 5.46E-01 | 1.00E+00 | 0.79  | 6.15E-01 | 9.43E-01 |
| XLOC_009153 | NA     | NA       | NA       | 0.64  | 6.15E-01 | 9.43E-01 |
| KRTAP9-3    | -18.04 | 1.08E-07 | 4.40E-05 | -1.61 | 6.15E-01 | 9.43E-01 |



|                    |       |          |          |       |          |          |
|--------------------|-------|----------|----------|-------|----------|----------|
| <b>AL365295.1</b>  | 0.02  | 9.74E-01 | 1.00E+00 | -0.28 | 6.15E-01 | 9.43E-01 |
| <b>LNCsRLR</b>     | -2.84 | 2.97E-01 | 1.00E+00 | -0.76 | 6.15E-01 | 9.43E-01 |
| <b>RAB28</b>       | 0.28  | 2.23E-01 | 1.00E+00 | -0.18 | 6.15E-01 | 9.43E-01 |
| <b>CRB1</b>        | -2.08 | 9.08E-02 | 1.00E+00 | -0.51 | 6.15E-01 | 9.43E-01 |
| <b>R3HDM2</b>      | -0.24 | 3.71E-01 | 1.00E+00 | 0.14  | 6.15E-01 | 9.43E-01 |
| <b>TMC7</b>        | -0.53 | 3.55E-01 | 1.00E+00 | 0.43  | 6.15E-01 | 9.43E-01 |
| <b>XLOC_011753</b> | -0.51 | 7.84E-01 | 1.00E+00 | 0.69  | 6.15E-01 | 9.43E-01 |
| <b>ARIH1</b>       | 0.13  | 5.33E-01 | 1.00E+00 | -0.13 | 6.15E-01 | 9.43E-01 |
| <b>SGO2</b>        | 0.19  | 6.52E-01 | 1.00E+00 | 0.14  | 6.15E-01 | 9.43E-01 |
| <b>CDK5</b>        | -0.25 | 1.37E-01 | 1.00E+00 | 0.09  | 6.15E-01 | 9.43E-01 |
| <b>C1orf226</b>    | -0.36 | 2.68E-01 | 1.00E+00 | -0.28 | 6.15E-01 | 9.43E-01 |
| <b>AP4E1</b>       | -0.17 | 6.36E-01 | 1.00E+00 | 0.15  | 6.15E-01 | 9.43E-01 |
| <b>FAAHP1</b>      | -0.54 | 8.69E-01 | 1.00E+00 | 0.76  | 6.15E-01 | 9.43E-01 |
| <b>LNx1</b>        | 0.12  | 7.15E-01 | 1.00E+00 | 0.13  | 6.15E-01 | 9.43E-01 |
| <b>RAB5B</b>       | -0.07 | 8.15E-01 | 1.00E+00 | 0.17  | 6.15E-01 | 9.43E-01 |
| <b>CRYL1</b>       | 0.10  | 8.01E-01 | 1.00E+00 | -0.16 | 6.15E-01 | 9.43E-01 |
| <b>CARNS1</b>      | -1.20 | 1.40E-02 | 7.46E-01 | -0.38 | 6.15E-01 | 9.43E-01 |
| <b>MPZL1</b>       | 0.19  | 4.83E-01 | 1.00E+00 | 0.13  | 6.15E-01 | 9.43E-01 |
| <b>OTOP1</b>       | -0.01 | 9.90E-01 | 1.00E+00 | -0.42 | 6.16E-01 | 9.43E-01 |
| <b>MIER2</b>       | -0.46 | 1.12E-01 | 1.00E+00 | 0.29  | 6.16E-01 | 9.43E-01 |
| <b>XRCC6P2</b>     | -0.03 | 9.85E-01 | 1.00E+00 | -0.30 | 6.16E-01 | 9.43E-01 |
| <b>ZNF682</b>      | -0.34 | 4.30E-01 | 1.00E+00 | -0.22 | 6.16E-01 | 9.43E-01 |
| <b>ORM2</b>        | NA    | NA       | NA       | 1.00  | 6.16E-01 | 9.44E-01 |
| <b>EBNA1BP2</b>    | -0.24 | 2.02E-01 | 1.00E+00 | -0.12 | 6.16E-01 | 9.44E-01 |
| <b>KDELc2</b>      | 0.24  | 2.39E-01 | 1.00E+00 | -0.15 | 6.16E-01 | 9.44E-01 |
| <b>CALCB</b>       | -2.46 | 8.36E-02 | 1.00E+00 | 0.69  | 6.16E-01 | 9.44E-01 |
| <b>SERPINB11</b>   | 1.76  | 6.07E-01 | 1.00E+00 | 1.61  | 6.16E-01 | 9.44E-01 |
| <b>SSBP4</b>       | -0.50 | 1.32E-02 | 7.22E-01 | 0.34  | 6.16E-01 | 9.44E-01 |
| <b>AC007285.1</b>  | 0.25  | 6.88E-01 | 1.00E+00 | 0.47  | 6.16E-01 | 9.44E-01 |
| <b>EIF3B</b>       | -0.10 | 6.78E-01 | 1.00E+00 | -0.25 | 6.16E-01 | 9.44E-01 |
| <b>AC044787.1</b>  | 0.10  | 9.30E-01 | 1.00E+00 | -0.32 | 6.16E-01 | 9.44E-01 |
| <b>AC007494.2</b>  | NA    | NA       | NA       | 0.60  | 6.16E-01 | 9.44E-01 |

|                    |       |          |          |       |          |          |
|--------------------|-------|----------|----------|-------|----------|----------|
| <b>PROK1</b>       | -0.07 | 9.65E-01 | 1.00E+00 | 0.72  | 6.16E-01 | 9.44E-01 |
| <b>AL080317.1</b>  | 1.76  | 2.23E-02 | 8.98E-01 | -0.33 | 6.16E-01 | 9.44E-01 |
| <b>SIGLEC6</b>     | 0.53  | 6.48E-01 | 1.00E+00 | -0.40 | 6.16E-01 | 9.44E-01 |
| <b>TEFM</b>        | 0.12  | 7.45E-01 | 1.00E+00 | -0.16 | 6.16E-01 | 9.44E-01 |
| <b>LIPH</b>        | 0.46  | 6.26E-02 | 1.00E+00 | -0.25 | 6.16E-01 | 9.44E-01 |
| <b>SLC12A6</b>     | 0.39  | 1.75E-01 | 1.00E+00 | 0.23  | 6.16E-01 | 9.44E-01 |
| <b>SLC4A8</b>      | -1.59 | 6.75E-02 | 1.00E+00 | 0.59  | 6.16E-01 | 9.44E-01 |
| <b>AL138885.3</b>  | -0.50 | 8.56E-01 | 1.00E+00 | 0.57  | 6.17E-01 | 9.44E-01 |
| <b>SYN1</b>        | 0.08  | 9.25E-01 | 1.00E+00 | 0.44  | 6.17E-01 | 9.44E-01 |
| <b>AATK</b>        | -0.72 | 1.35E-01 | 1.00E+00 | -1.51 | 6.17E-01 | 9.44E-01 |
| <b>EEF1B2</b>      | -0.23 | 5.06E-01 | 1.00E+00 | 0.11  | 6.17E-01 | 9.44E-01 |
| <b>G28443</b>      | -0.84 | 3.28E-01 | 1.00E+00 | 0.41  | 6.17E-01 | 9.44E-01 |
| <b>MAP2K1</b>      | 0.33  | 3.99E-01 | 1.00E+00 | -0.25 | 6.17E-01 | 9.44E-01 |
| <b>PDE9A</b>       | -0.04 | 9.49E-01 | 1.00E+00 | -0.28 | 6.17E-01 | 9.44E-01 |
| <b>XLOC_000302</b> | 0.42  | 3.74E-01 | 1.00E+00 | -0.38 | 6.17E-01 | 9.44E-01 |
| <b>MRPL1</b>       | 0.09  | 6.79E-01 | 1.00E+00 | 0.10  | 6.17E-01 | 9.44E-01 |
| <b>IGHV2-5</b>     | 3.93  | 3.81E-02 | 1.00E+00 | 1.59  | 6.17E-01 | 9.44E-01 |
| <b>PLCH1</b>       | -0.83 | 2.13E-01 | 1.00E+00 | -0.36 | 6.17E-01 | 9.44E-01 |
| <b>LINC01560</b>   | -0.15 | 6.66E-01 | 1.00E+00 | -0.17 | 6.17E-01 | 9.44E-01 |
| <b>CGNL1</b>       | 0.00  | 9.93E-01 | 1.00E+00 | -0.23 | 6.17E-01 | 9.44E-01 |
| <b>AC018742.1</b>  | 1.21  | 1.28E-01 | 1.00E+00 | -0.37 | 6.17E-01 | 9.44E-01 |
| <b>KTI12</b>       | -0.32 | 4.39E-01 | 1.00E+00 | -0.16 | 6.17E-01 | 9.44E-01 |
| <b>SMIM5</b>       | -0.15 | 7.67E-01 | 1.00E+00 | 0.26  | 6.17E-01 | 9.44E-01 |
| <b>TSIX</b>        | -1.93 | 5.74E-01 | 1.00E+00 | -0.73 | 6.17E-01 | 9.44E-01 |
| <b>FAM49B</b>      | 0.00  | 9.97E-01 | 1.00E+00 | -0.15 | 6.17E-01 | 9.44E-01 |
| <b>GTPBP10</b>     | 0.18  | 4.43E-01 | 1.00E+00 | 0.09  | 6.17E-01 | 9.44E-01 |
| <b>NOP56</b>       | -0.15 | 5.32E-01 | 1.00E+00 | 0.11  | 6.17E-01 | 9.44E-01 |
| <b>LINC02599</b>   | -2.40 | 2.83E-02 | 9.75E-01 | 0.71  | 6.17E-01 | 9.44E-01 |
| <b>PSMD14</b>      | -0.01 | 9.76E-01 | 1.00E+00 | -0.14 | 6.17E-01 | 9.44E-01 |
| <b>ECSIT</b>       | -0.23 | 3.31E-01 | 1.00E+00 | 0.12  | 6.17E-01 | 9.44E-01 |
| <b>CDCA7L</b>      | 0.15  | 6.52E-01 | 1.00E+00 | -0.19 | 6.17E-01 | 9.44E-01 |
| <b>GRIN2B</b>      | -0.83 | 5.65E-01 | 1.00E+00 | -0.47 | 6.17E-01 | 9.44E-01 |

|                   |       |          |          |       |          |          |
|-------------------|-------|----------|----------|-------|----------|----------|
| <b>RALGAPA1P1</b> | 0.34  | 6.66E-01 | 1.00E+00 | -0.19 | 6.18E-01 | 9.44E-01 |
| <b>POMGNT2</b>    | 0.00  | 9.96E-01 | 1.00E+00 | -0.20 | 6.18E-01 | 9.44E-01 |
| <b>AC011933.1</b> | -0.92 | 6.91E-01 | 1.00E+00 | -0.25 | 6.18E-01 | 9.44E-01 |
| <b>ZNF197-AS1</b> | -1.62 | 3.87E-01 | 1.00E+00 | -0.59 | 6.18E-01 | 9.44E-01 |
| <b>AC005790.1</b> | -0.98 | 5.48E-01 | 1.00E+00 | 0.57  | 6.18E-01 | 9.44E-01 |
| <b>TRAV3</b>      | -2.09 | 3.59E-01 | 1.00E+00 | 0.62  | 6.18E-01 | 9.44E-01 |
| <b>RPS3AP26</b>   | -0.20 | 6.13E-01 | 1.00E+00 | -0.22 | 6.18E-01 | 9.44E-01 |
| <b>KIF9-AS1</b>   | 0.46  | 6.09E-01 | 1.00E+00 | 0.32  | 6.18E-01 | 9.44E-01 |
| <b>PTPN21</b>     | 0.15  | 6.47E-01 | 1.00E+00 | -0.16 | 6.18E-01 | 9.44E-01 |
| <b>LRP6</b>       | 0.16  | 6.13E-01 | 1.00E+00 | -0.19 | 6.18E-01 | 9.44E-01 |
| <b>TMOD3</b>      | 0.08  | 7.29E-01 | 1.00E+00 | 0.09  | 6.18E-01 | 9.44E-01 |
| <b>FGF2</b>       | 0.56  | 3.96E-01 | 1.00E+00 | -0.31 | 6.18E-01 | 9.44E-01 |
| <b>KRT35</b>      | -3.45 | 2.99E-01 | 1.00E+00 | -1.58 | 6.18E-01 | 9.44E-01 |
| <b>MAP7D3</b>     | 0.16  | 6.62E-01 | 1.00E+00 | 0.17  | 6.18E-01 | 9.44E-01 |
| <b>MID2</b>       | -0.04 | 9.22E-01 | 1.00E+00 | -0.25 | 6.18E-01 | 9.44E-01 |
| <b>AC092376.3</b> | -0.35 | 6.54E-01 | 1.00E+00 | -0.63 | 6.18E-01 | 9.44E-01 |
| <b>LINC02447</b>  | 0.31  | 6.96E-01 | 1.00E+00 | -0.32 | 6.18E-01 | 9.44E-01 |
| <b>AC068790.9</b> | -1.29 | 7.04E-01 | 1.00E+00 | -0.68 | 6.18E-01 | 9.44E-01 |
| <b>AIFM2</b>      | 1.73  | 1.68E-02 | 8.16E-01 | -0.29 | 6.18E-01 | 9.44E-01 |
| <b>TUBAP2</b>     | 1.02  | 4.13E-01 | 1.00E+00 | -0.25 | 6.18E-01 | 9.44E-01 |
| <b>AL592148.3</b> | 0.63  | 3.09E-01 | 1.00E+00 | -0.23 | 6.18E-01 | 9.44E-01 |
| <b>BBS4</b>       | -0.18 | 4.94E-01 | 1.00E+00 | -0.14 | 6.18E-01 | 9.44E-01 |
| <b>RBM24</b>      | 0.14  | 8.25E-01 | 1.00E+00 | -0.45 | 6.18E-01 | 9.44E-01 |
| <b>AL136295.5</b> | 0.34  | 7.91E-01 | 1.00E+00 | 0.40  | 6.18E-01 | 9.44E-01 |
| <b>AC125807.1</b> | 0.76  | 6.87E-01 | 1.00E+00 | -0.27 | 6.18E-01 | 9.44E-01 |
| <b>NDUFS2</b>     | -0.01 | 9.73E-01 | 1.00E+00 | -0.10 | 6.19E-01 | 9.44E-01 |
| <b>SIX5</b>       | 0.02  | 9.43E-01 | 1.00E+00 | 0.38  | 6.19E-01 | 9.44E-01 |
| <b>KRTAP12-3</b>  | -3.31 | 1.06E-01 | 1.00E+00 | -1.15 | 6.19E-01 | 9.44E-01 |
| <b>ZBTB39</b>     | -0.04 | 8.52E-01 | 1.00E+00 | 0.26  | 6.19E-01 | 9.44E-01 |
| <b>AC092903.2</b> | 0.45  | 6.69E-01 | 1.00E+00 | -0.45 | 6.19E-01 | 9.44E-01 |
| <b>VHL</b>        | -0.29 | 2.58E-01 | 1.00E+00 | 0.28  | 6.19E-01 | 9.44E-01 |
| <b>AK4P1</b>      | 0.29  | 6.44E-01 | 1.00E+00 | 0.29  | 6.19E-01 | 9.44E-01 |

|                    |       |          |          |       |          |          |
|--------------------|-------|----------|----------|-------|----------|----------|
| <b>GAS1</b>        | 0.53  | 1.13E-01 | 1.00E+00 | 0.28  | 6.19E-01 | 9.44E-01 |
| <b>TM6SF1</b>      | -0.05 | 9.25E-01 | 1.00E+00 | 0.23  | 6.19E-01 | 9.44E-01 |
| <b>RPARP-AS1</b>   | -0.14 | 7.16E-01 | 1.00E+00 | -0.18 | 6.19E-01 | 9.44E-01 |
| <b>ZNF623</b>      | 0.33  | 1.20E-01 | 1.00E+00 | -0.12 | 6.19E-01 | 9.44E-01 |
| <b>SMAP1</b>       | -0.16 | 5.62E-01 | 1.00E+00 | -0.11 | 6.19E-01 | 9.44E-01 |
| <b>AC007292.2</b>  | -1.06 | 2.66E-01 | 1.00E+00 | -0.40 | 6.19E-01 | 9.44E-01 |
| <b>DGKA</b>        | 0.07  | 8.45E-01 | 1.00E+00 | -0.16 | 6.19E-01 | 9.44E-01 |
| <b>GPX3</b>        | 0.80  | 1.60E-01 | 1.00E+00 | -0.29 | 6.19E-01 | 9.44E-01 |
| <b>MYO9A</b>       | 0.08  | 7.23E-01 | 1.00E+00 | -0.10 | 6.19E-01 | 9.44E-01 |
| <b>C10orf90</b>    | -0.37 | 4.32E-01 | 1.00E+00 | 0.32  | 6.19E-01 | 9.44E-01 |
| <b>AC023906.2</b>  | 0.52  | 4.29E-01 | 1.00E+00 | 0.36  | 6.19E-01 | 9.44E-01 |
| <b>ZNF767P</b>     | -0.71 | 1.25E-01 | 1.00E+00 | -0.32 | 6.19E-01 | 9.44E-01 |
| <b>FRRS1L</b>      | -3.58 | 1.25E-02 | 6.96E-01 | -0.60 | 6.19E-01 | 9.44E-01 |
| <b>TNS1</b>        | 0.37  | 4.90E-01 | 1.00E+00 | 0.37  | 6.19E-01 | 9.44E-01 |
| <b>SFRP5</b>       | -0.43 | 5.78E-01 | 1.00E+00 | -1.57 | 6.19E-01 | 9.44E-01 |
| <b>AP005271.1</b>  | 3.23  | 1.43E-01 | 1.00E+00 | 0.58  | 6.19E-01 | 9.44E-01 |
| <b>TMSB4Y</b>      | -0.15 | 8.72E-01 | 1.00E+00 | 0.30  | 6.19E-01 | 9.44E-01 |
| <b>CACHD1</b>      | -0.03 | 9.38E-01 | 1.00E+00 | -0.23 | 6.20E-01 | 9.44E-01 |
| <b>ROR1</b>        | -0.11 | 7.62E-01 | 1.00E+00 | -0.22 | 6.20E-01 | 9.44E-01 |
| <b>APOPT1</b>      | 0.39  | 1.48E-01 | 1.00E+00 | -0.17 | 6.20E-01 | 9.44E-01 |
| <b>STX16</b>       | 0.13  | 5.26E-01 | 1.00E+00 | 0.13  | 6.20E-01 | 9.44E-01 |
| <b>TMEM131</b>     | -0.28 | 1.76E-01 | 1.00E+00 | -0.18 | 6.20E-01 | 9.44E-01 |
| <b>ALG13</b>       | -0.13 | 5.31E-01 | 1.00E+00 | -0.12 | 6.20E-01 | 9.44E-01 |
| <b>LRRC70</b>      | 1.74  | 2.06E-01 | 1.00E+00 | -0.45 | 6.20E-01 | 9.44E-01 |
| <b>KRTCAP2</b>     | -0.65 | 8.31E-01 | 1.00E+00 | 0.41  | 6.20E-01 | 9.44E-01 |
| <b>AL161756.1</b>  | -0.71 | 8.32E-01 | 1.00E+00 | 0.67  | 6.20E-01 | 9.44E-01 |
| <b>NXF1</b>        | -0.63 | 2.63E-02 | 9.46E-01 | 0.12  | 6.20E-01 | 9.44E-01 |
| <b>AC013275.1</b>  | 2.53  | 1.95E-01 | 1.00E+00 | -0.87 | 6.20E-01 | 9.44E-01 |
| <b>SUGP1</b>       | -0.18 | 4.24E-01 | 1.00E+00 | 0.09  | 6.20E-01 | 9.44E-01 |
| <b>XLOC_002108</b> | -3.10 | 6.28E-02 | 1.00E+00 | 0.67  | 6.20E-01 | 9.44E-01 |
| <b>DYRK1B</b>      | -0.22 | 4.51E-01 | 1.00E+00 | 0.22  | 6.20E-01 | 9.44E-01 |
| <b>PHB</b>         | -0.01 | 9.48E-01 | 1.00E+00 | 0.10  | 6.20E-01 | 9.44E-01 |

|                   |       |          |          |       |          |          |
|-------------------|-------|----------|----------|-------|----------|----------|
| <b>ABT1</b>       | -0.19 | 3.58E-01 | 1.00E+00 | 0.11  | 6.20E-01 | 9.44E-01 |
| <b>ZNF793</b>     | 0.07  | 8.08E-01 | 1.00E+00 | -0.22 | 6.20E-01 | 9.44E-01 |
| <b>AC007878.1</b> | -0.35 | 7.51E-01 | 1.00E+00 | 0.44  | 6.20E-01 | 9.44E-01 |
| <b>OSM</b>        | -2.94 | 3.07E-02 | 1.00E+00 | 1.56  | 6.20E-01 | 9.44E-01 |
| <b>ARFIP1</b>     | 0.11  | 6.69E-01 | 1.00E+00 | -0.10 | 6.20E-01 | 9.44E-01 |
| <b>RN7SL832P</b>  | -0.48 | 3.83E-01 | 1.00E+00 | 0.28  | 6.20E-01 | 9.44E-01 |
| <b>AP001029.2</b> | -1.95 | 5.69E-01 | 1.00E+00 | 0.66  | 6.20E-01 | 9.44E-01 |
| <b>TRIM9</b>      | -0.74 | 2.18E-01 | 1.00E+00 | 0.33  | 6.20E-01 | 9.44E-01 |
| <b>SPEF1</b>      | -0.22 | 8.27E-01 | 1.00E+00 | -0.60 | 6.20E-01 | 9.44E-01 |
| <b>MICAL3</b>     | -0.49 | 2.98E-02 | 9.97E-01 | 0.37  | 6.20E-01 | 9.44E-01 |
| <b>MT1A</b>       | -1.67 | 1.42E-01 | 1.00E+00 | -0.28 | 6.20E-01 | 9.44E-01 |
| <b>SRSF7</b>      | -0.10 | 7.07E-01 | 1.00E+00 | 0.10  | 6.20E-01 | 9.44E-01 |
| <b>EFHD2</b>      | -0.31 | 1.47E-01 | 1.00E+00 | 0.29  | 6.20E-01 | 9.44E-01 |
| <b>JAK1</b>       | -0.13 | 5.56E-01 | 1.00E+00 | -0.13 | 6.21E-01 | 9.44E-01 |
| <b>AC068768.1</b> | -0.33 | 5.23E-01 | 1.00E+00 | 0.27  | 6.21E-01 | 9.44E-01 |
| <b>PA2G4P4</b>    | -1.54 | 4.47E-01 | 1.00E+00 | 0.35  | 6.21E-01 | 9.44E-01 |
| <b>IFRD2</b>      | -0.23 | 4.47E-01 | 1.00E+00 | 0.13  | 6.21E-01 | 9.44E-01 |
| <b>POF1B</b>      | 0.10  | 8.83E-01 | 1.00E+00 | -0.34 | 6.21E-01 | 9.44E-01 |
| <b>AC006206.2</b> | -2.28 | 4.05E-02 | 1.00E+00 | 0.63  | 6.21E-01 | 9.44E-01 |
| <b>ARPC5</b>      | 0.22  | 1.57E-01 | 1.00E+00 | -0.14 | 6.21E-01 | 9.44E-01 |
| <b>AC098487.1</b> | 0.65  | 6.32E-01 | 1.00E+00 | -0.33 | 6.21E-01 | 9.44E-01 |
| <b>BTBD2</b>      | -0.19 | 4.34E-01 | 1.00E+00 | 0.21  | 6.21E-01 | 9.44E-01 |
| <b>G230</b>       | 0.70  | 8.09E-01 | 1.00E+00 | 0.75  | 6.21E-01 | 9.44E-01 |
| <b>WAC</b>        | 0.02  | 9.16E-01 | 1.00E+00 | 0.11  | 6.21E-01 | 9.44E-01 |
| <b>RIN1</b>       | -0.12 | 7.32E-01 | 1.00E+00 | 0.21  | 6.21E-01 | 9.44E-01 |
| <b>UGDH</b>       | 0.34  | 2.51E-01 | 1.00E+00 | -0.16 | 6.21E-01 | 9.44E-01 |
| <b>GCN1</b>       | 0.21  | 3.96E-01 | 1.00E+00 | 0.24  | 6.21E-01 | 9.44E-01 |
| <b>B3GALNT2</b>   | 0.28  | 4.39E-01 | 1.00E+00 | -0.20 | 6.21E-01 | 9.44E-01 |
| <b>NDUFV2-AS1</b> | -0.06 | 8.90E-01 | 1.00E+00 | 0.19  | 6.21E-01 | 9.44E-01 |
| <b>AC069281.2</b> | -2.22 | 2.46E-01 | 1.00E+00 | -0.48 | 6.21E-01 | 9.44E-01 |
| <b>CD274</b>      | -0.71 | 2.68E-01 | 1.00E+00 | 1.55  | 6.21E-01 | 9.44E-01 |
| <b>SH3RF1</b>     | -0.14 | 6.39E-01 | 1.00E+00 | 0.12  | 6.21E-01 | 9.44E-01 |

|                   |       |          |          |       |          |          |
|-------------------|-------|----------|----------|-------|----------|----------|
| <b>AC016722.2</b> | 3.98  | 2.17E-02 | 8.94E-01 | -0.48 | 6.21E-01 | 9.44E-01 |
| <b>AF117829.1</b> | 0.66  | 1.80E-01 | 1.00E+00 | 0.20  | 6.21E-01 | 9.44E-01 |
| <b>AL162171.2</b> | 0.37  | 9.14E-01 | 1.00E+00 | 0.73  | 6.21E-01 | 9.44E-01 |
| <b>CLDN1</b>      | 0.38  | 3.95E-01 | 1.00E+00 | -0.28 | 6.21E-01 | 9.44E-01 |
| <b>CXCR2P1</b>    | -1.02 | 5.28E-01 | 1.00E+00 | 1.55  | 6.22E-01 | 9.44E-01 |
| <b>G8154</b>      | -0.38 | 6.85E-01 | 1.00E+00 | -0.36 | 6.22E-01 | 9.44E-01 |
| <b>ENDOU</b>      | -0.16 | 7.62E-01 | 1.00E+00 | 0.31  | 6.22E-01 | 9.44E-01 |
| <b>AC099550.1</b> | -1.58 | 5.52E-01 | 1.00E+00 | -0.54 | 6.22E-01 | 9.44E-01 |
| <b>AC091948.1</b> | 1.40  | 2.72E-01 | 1.00E+00 | -0.50 | 6.22E-01 | 9.44E-01 |
| <b>RPL26P6</b>    | -1.49 | 4.50E-01 | 1.00E+00 | -0.36 | 6.22E-01 | 9.44E-01 |
| <b>MYO1C</b>      | 0.24  | 4.88E-01 | 1.00E+00 | -0.24 | 6.22E-01 | 9.44E-01 |
| <b>PIK3C2G</b>    | -0.15 | 6.68E-01 | 1.00E+00 | -0.31 | 6.22E-01 | 9.44E-01 |
| <b>AFF1</b>       | -0.06 | 7.74E-01 | 1.00E+00 | -0.17 | 6.22E-01 | 9.44E-01 |
| <b>ZMAT3</b>      | 0.28  | 2.61E-01 | 1.00E+00 | 0.14  | 6.22E-01 | 9.44E-01 |
| <b>ZNF726</b>     | 0.09  | 9.18E-01 | 1.00E+00 | -0.30 | 6.22E-01 | 9.44E-01 |
| <b>G5664</b>      | 0.75  | 5.75E-01 | 1.00E+00 | 0.46  | 6.22E-01 | 9.44E-01 |
| <b>LINP1</b>      | -1.48 | 5.25E-01 | 1.00E+00 | 0.70  | 6.22E-01 | 9.44E-01 |
| <b>SARM1</b>      | -0.24 | 4.11E-01 | 1.00E+00 | 0.27  | 6.22E-01 | 9.44E-01 |
| <b>MED16</b>      | -0.18 | 4.67E-01 | 1.00E+00 | 0.18  | 6.22E-01 | 9.44E-01 |
| <b>CD70</b>       | 0.10  | 9.08E-01 | 1.00E+00 | 0.88  | 6.22E-01 | 9.44E-01 |
| <b>CYP3A4</b>     | 0.89  | 1.39E-01 | 1.00E+00 | -0.43 | 6.22E-01 | 9.44E-01 |
| <b>OVCH1-AS1</b>  | 0.45  | 5.99E-01 | 1.00E+00 | 0.35  | 6.22E-01 | 9.44E-01 |
| <b>CRYGS</b>      | -0.24 | 9.21E-01 | 1.00E+00 | 0.79  | 6.22E-01 | 9.44E-01 |
| <b>LDB1</b>       | -0.37 | 1.97E-01 | 1.00E+00 | 0.29  | 6.22E-01 | 9.44E-01 |
| <b>MAP3K4</b>     | 0.26  | 2.35E-01 | 1.00E+00 | 0.12  | 6.22E-01 | 9.44E-01 |
| <b>CHTOP</b>      | 0.09  | 6.33E-01 | 1.00E+00 | 0.07  | 6.22E-01 | 9.44E-01 |
| <b>LRRC27</b>     | -0.03 | 9.27E-01 | 1.00E+00 | 0.19  | 6.22E-01 | 9.44E-01 |
| <b>CCDC18</b>     | -0.27 | 6.09E-01 | 1.00E+00 | -0.17 | 6.23E-01 | 9.44E-01 |
| <b>ADPGK-AS1</b>  | -0.57 | 6.66E-01 | 1.00E+00 | -0.39 | 6.23E-01 | 9.44E-01 |
| <b>MAPK8IP3</b>   | -0.62 | 6.52E-02 | 1.00E+00 | 0.40  | 6.23E-01 | 9.44E-01 |
| <b>NECAP2</b>     | -0.07 | 7.09E-01 | 1.00E+00 | 0.08  | 6.23E-01 | 9.44E-01 |
| <b>UROS</b>       | -0.27 | 1.50E-01 | 1.00E+00 | -0.13 | 6.23E-01 | 9.44E-01 |

|             |       |          |          |       |          |          |
|-------------|-------|----------|----------|-------|----------|----------|
| ARHGEF39    | 0.42  | 3.67E-01 | 1.00E+00 | 0.22  | 6.23E-01 | 9.44E-01 |
| CENPQ       | 0.39  | 2.85E-01 | 1.00E+00 | -0.13 | 6.23E-01 | 9.44E-01 |
| SOBP        | 0.02  | 9.67E-01 | 1.00E+00 | 0.34  | 6.23E-01 | 9.44E-01 |
| AC099518.1  | -1.69 | 3.79E-01 | 1.00E+00 | -0.54 | 6.23E-01 | 9.44E-01 |
| C7orf31     | -0.07 | 8.21E-01 | 1.00E+00 | -0.20 | 6.23E-01 | 9.44E-01 |
| AC009119.1  | -0.43 | 8.25E-01 | 1.00E+00 | 0.47  | 6.23E-01 | 9.44E-01 |
| KDM3B       | -0.10 | 6.11E-01 | 1.00E+00 | 0.17  | 6.23E-01 | 9.44E-01 |
| SKA3        | -0.23 | 5.21E-01 | 1.00E+00 | 0.26  | 6.23E-01 | 9.44E-01 |
| ARHGAP19    | 0.61  | 1.93E-02 | 8.74E-01 | 0.13  | 6.23E-01 | 9.45E-01 |
| NFKBIZ      | -2.50 | 1.94E-02 | 8.74E-01 | 0.28  | 6.23E-01 | 9.45E-01 |
| RASL10B     | 1.05  | 1.61E-01 | 1.00E+00 | 0.56  | 6.23E-01 | 9.45E-01 |
| snoU109     | -0.05 | 9.62E-01 | 1.00E+00 | -0.26 | 6.23E-01 | 9.45E-01 |
| SDF4        | -0.05 | 8.09E-01 | 1.00E+00 | 0.33  | 6.24E-01 | 9.45E-01 |
| PSG4        | 1.17  | 3.41E-01 | 1.00E+00 | 0.63  | 6.24E-01 | 9.45E-01 |
| TMEM101     | 0.30  | 2.64E-02 | 9.49E-01 | 0.10  | 6.24E-01 | 9.45E-01 |
| PIGN        | -0.04 | 8.88E-01 | 1.00E+00 | -0.16 | 6.24E-01 | 9.45E-01 |
| LRRC37A2    | 0.25  | 4.47E-01 | 1.00E+00 | -0.15 | 6.24E-01 | 9.45E-01 |
| ERICH3      | 0.25  | 8.53E-01 | 1.00E+00 | 1.56  | 6.24E-01 | 9.45E-01 |
| TMEM51-AS1  | 0.88  | 9.07E-02 | 1.00E+00 | 0.41  | 6.24E-01 | 9.45E-01 |
| CNBP        | -0.02 | 9.22E-01 | 1.00E+00 | -0.12 | 6.24E-01 | 9.45E-01 |
| AC090186.1  | -1.65 | 3.43E-01 | 1.00E+00 | -0.49 | 6.24E-01 | 9.45E-01 |
| PDSS2       | -0.04 | 8.51E-01 | 1.00E+00 | 0.12  | 6.24E-01 | 9.45E-01 |
| RNASE4      | -0.13 | 8.29E-01 | 1.00E+00 | -0.25 | 6.24E-01 | 9.45E-01 |
| FOSL2       | -0.43 | 2.80E-01 | 1.00E+00 | 0.23  | 6.24E-01 | 9.45E-01 |
| AC007683.1  | 0.43  | 9.03E-01 | 1.00E+00 | -0.31 | 6.24E-01 | 9.45E-01 |
| MFSD1       | 0.41  | 8.62E-02 | 1.00E+00 | -0.10 | 6.24E-01 | 9.45E-01 |
| CEP152      | 0.19  | 4.97E-01 | 1.00E+00 | -0.27 | 6.24E-01 | 9.45E-01 |
| AL122010.1  | -0.39 | 4.62E-01 | 1.00E+00 | 0.28  | 6.24E-01 | 9.45E-01 |
| XLOC_012288 | -0.53 | 6.53E-01 | 1.00E+00 | -0.48 | 6.24E-01 | 9.45E-01 |
| SLC9A3R2    | 0.10  | 8.19E-01 | 1.00E+00 | 0.27  | 6.24E-01 | 9.45E-01 |
| RNF8        | 0.11  | 6.22E-01 | 1.00E+00 | 0.10  | 6.24E-01 | 9.45E-01 |
| SEPT7P7     | NA    | NA       | NA       | -0.35 | 6.24E-01 | 9.45E-01 |

|                   |       |          |          |       |          |          |
|-------------------|-------|----------|----------|-------|----------|----------|
| <b>AC004477.1</b> | -0.96 | 3.43E-01 | 1.00E+00 | 0.50  | 6.24E-01 | 9.45E-01 |
| <b>CEP162</b>     | -0.41 | 1.76E-01 | 1.00E+00 | -0.21 | 6.25E-01 | 9.45E-01 |
| <b>MYOM3</b>      | -0.44 | 4.28E-01 | 1.00E+00 | 0.30  | 6.25E-01 | 9.45E-01 |
| <b>AL050343.1</b> | 1.44  | 1.05E-01 | 1.00E+00 | -0.56 | 6.25E-01 | 9.45E-01 |
| <b>PCNX4</b>      | 0.01  | 9.46E-01 | 1.00E+00 | -0.10 | 6.25E-01 | 9.45E-01 |
| <b>MSANTD2</b>    | 0.03  | 9.43E-01 | 1.00E+00 | -0.25 | 6.25E-01 | 9.45E-01 |
| <b>TMEM52B</b>    | -2.13 | 4.31E-01 | 1.00E+00 | 0.59  | 6.25E-01 | 9.45E-01 |
| <b>FAM32A</b>     | 0.08  | 7.04E-01 | 1.00E+00 | 0.08  | 6.25E-01 | 9.45E-01 |
| <b>ZBTB44</b>     | 0.14  | 4.08E-01 | 1.00E+00 | 0.13  | 6.25E-01 | 9.45E-01 |
| <b>COX10</b>      | -0.10 | 6.37E-01 | 1.00E+00 | -0.11 | 6.25E-01 | 9.45E-01 |
| <b>LINC00899</b>  | -0.51 | 2.11E-01 | 1.00E+00 | 0.24  | 6.25E-01 | 9.45E-01 |
| <b>AC233266.2</b> | -1.15 | 7.39E-01 | 1.00E+00 | -0.46 | 6.25E-01 | 9.45E-01 |
| <b>AC096564.1</b> | -0.74 | 8.32E-01 | 1.00E+00 | 0.39  | 6.25E-01 | 9.45E-01 |
| <b>DRAP1</b>      | -0.28 | 3.30E-01 | 1.00E+00 | 0.13  | 6.25E-01 | 9.45E-01 |
| <b>PTPRF</b>      | 0.01  | 9.74E-01 | 1.00E+00 | -0.17 | 6.25E-01 | 9.45E-01 |
| <b>MTMR8</b>      | -0.62 | 1.69E-01 | 1.00E+00 | -0.21 | 6.25E-01 | 9.45E-01 |
| <b>ST7L</b>       | -0.32 | 1.18E-01 | 1.00E+00 | -0.14 | 6.25E-01 | 9.45E-01 |
| <b>ABAT</b>       | -0.85 | 1.29E-02 | 7.15E-01 | -0.19 | 6.25E-01 | 9.45E-01 |
| <b>BOD1L1</b>     | -0.12 | 5.00E-01 | 1.00E+00 | 0.19  | 6.25E-01 | 9.45E-01 |
| <b>AC087257.2</b> | -0.81 | 7.43E-01 | 1.00E+00 | -0.47 | 6.25E-01 | 9.45E-01 |
| <b>AC005046.1</b> | 1.10  | 4.43E-01 | 1.00E+00 | 0.37  | 6.25E-01 | 9.45E-01 |
| <b>NUS1</b>       | 0.05  | 8.25E-01 | 1.00E+00 | 0.17  | 6.25E-01 | 9.45E-01 |
| <b>AASS</b>       | -0.42 | 2.02E-01 | 1.00E+00 | -0.21 | 6.25E-01 | 9.45E-01 |
| <b>GATD3A</b>     | -0.75 | 1.76E-01 | 1.00E+00 | -0.43 | 6.26E-01 | 9.45E-01 |
| <b>GAPDHP14</b>   | -1.93 | 4.21E-01 | 1.00E+00 | 0.65  | 6.26E-01 | 9.45E-01 |
| <b>FRG2DP</b>     | -1.48 | 3.02E-01 | 1.00E+00 | 0.55  | 6.26E-01 | 9.45E-01 |
| <b>LINC01090</b>  | -0.23 | 9.24E-01 | 1.00E+00 | 0.38  | 6.26E-01 | 9.45E-01 |
| <b>ALMS1-IT1</b>  | 0.85  | 1.72E-01 | 1.00E+00 | 0.44  | 6.26E-01 | 9.45E-01 |
| <b>TXN2</b>       | -0.11 | 5.78E-01 | 1.00E+00 | -0.11 | 6.26E-01 | 9.45E-01 |
| <b>MPZL3</b>      | 0.54  | 2.70E-01 | 1.00E+00 | 0.29  | 6.26E-01 | 9.45E-01 |
| <b>PPFIA3</b>     | -0.12 | 7.90E-01 | 1.00E+00 | -0.22 | 6.26E-01 | 9.45E-01 |
| <b>MFS14A</b>     | -0.24 | 7.20E-01 | 1.00E+00 | 0.27  | 6.26E-01 | 9.45E-01 |



|                   |       |          |          |       |          |          |
|-------------------|-------|----------|----------|-------|----------|----------|
| <b>MIR4740</b>    | 0.10  | 9.18E-01 | 1.00E+00 | 0.71  | 6.26E-01 | 9.45E-01 |
| <b>PGM5P4-AS1</b> | -0.05 | 9.35E-01 | 1.00E+00 | -0.25 | 6.26E-01 | 9.45E-01 |
| <b>ATP6V0D2</b>   | 1.40  | 6.82E-01 | 1.00E+00 | 1.55  | 6.26E-01 | 9.45E-01 |
| <b>AC090013.1</b> | 0.25  | 9.42E-01 | 1.00E+00 | -0.38 | 6.26E-01 | 9.45E-01 |
| <b>AL035078.1</b> | NA    | NA       | NA       | 0.36  | 6.26E-01 | 9.45E-01 |
| <b>AL137058.1</b> | -0.37 | 8.38E-01 | 1.00E+00 | -0.51 | 6.26E-01 | 9.45E-01 |
| <b>ZNF211</b>     | -0.27 | 4.48E-01 | 1.00E+00 | 0.15  | 6.26E-01 | 9.45E-01 |
| <b>CCDC13</b>     | -1.16 | 7.37E-01 | 1.00E+00 | 0.55  | 6.26E-01 | 9.45E-01 |
| <b>AL591895.1</b> | 1.15  | 3.15E-02 | 1.00E+00 | 0.28  | 6.26E-01 | 9.45E-01 |
| <b>POC5</b>       | 0.35  | 1.55E-01 | 1.00E+00 | -0.12 | 6.26E-01 | 9.45E-01 |
| <b>SERTAD2</b>    | -0.20 | 3.74E-01 | 1.00E+00 | 0.14  | 6.26E-01 | 9.45E-01 |
| <b>AC012513.3</b> | 0.79  | 8.27E-02 | 1.00E+00 | 0.37  | 6.26E-01 | 9.45E-01 |
| <b>ERVK3-1</b>    | 0.21  | 7.20E-01 | 1.00E+00 | 0.18  | 6.26E-01 | 9.45E-01 |
| <b>TMEM143</b>    | -0.06 | 8.05E-01 | 1.00E+00 | -0.15 | 6.26E-01 | 9.45E-01 |
| <b>CEBPZ</b>      | 0.08  | 7.11E-01 | 1.00E+00 | -0.10 | 6.26E-01 | 9.45E-01 |
| <b>AC090498.1</b> | -0.29 | 2.63E-01 | 1.00E+00 | 0.37  | 6.26E-01 | 9.45E-01 |
| <b>USP5</b>       | -0.10 | 6.99E-01 | 1.00E+00 | 0.13  | 6.27E-01 | 9.45E-01 |
| <b>PCDHGA5</b>    | 0.53  | 3.74E-01 | 1.00E+00 | -0.37 | 6.27E-01 | 9.45E-01 |
| <b>AC092119.3</b> | -1.83 | 3.76E-01 | 1.00E+00 | 0.35  | 6.27E-01 | 9.45E-01 |
| <b>C9orf152</b>   | -0.08 | 9.03E-01 | 1.00E+00 | -0.36 | 6.27E-01 | 9.45E-01 |
| <b>DLG5</b>       | -0.10 | 7.13E-01 | 1.00E+00 | 0.32  | 6.27E-01 | 9.45E-01 |
| <b>VSNL1</b>      | -0.67 | 4.05E-02 | 1.00E+00 | 0.26  | 6.27E-01 | 9.45E-01 |
| <b>G6708</b>      | 0.60  | 4.84E-01 | 1.00E+00 | 0.26  | 6.27E-01 | 9.45E-01 |
| <b>FGF14</b>      | 0.28  | 6.96E-01 | 1.00E+00 | 0.28  | 6.27E-01 | 9.45E-01 |
| <b>CLVS1</b>      | 0.46  | 3.72E-01 | 1.00E+00 | 0.28  | 6.27E-01 | 9.45E-01 |
| <b>FLG-AS1</b>    | 0.21  | 6.59E-01 | 1.00E+00 | -0.28 | 6.27E-01 | 9.45E-01 |
| <b>PAX8-AS1</b>   | -0.08 | 9.07E-01 | 1.00E+00 | 0.24  | 6.27E-01 | 9.45E-01 |
| <b>PLA2G6</b>     | -0.09 | 7.62E-01 | 1.00E+00 | 0.19  | 6.27E-01 | 9.45E-01 |
| <b>CFAP20</b>     | 0.05  | 7.82E-01 | 1.00E+00 | -0.14 | 6.27E-01 | 9.45E-01 |
| <b>AC107294.3</b> | -2.87 | 1.22E-01 | 1.00E+00 | -0.53 | 6.27E-01 | 9.45E-01 |
| <b>FAM171A2</b>   | -0.69 | 1.21E-01 | 1.00E+00 | -0.58 | 6.27E-01 | 9.45E-01 |
| <b>NAP1L3</b>     | 0.18  | 7.19E-01 | 1.00E+00 | 0.21  | 6.27E-01 | 9.45E-01 |

|             |       |          |          |       |          |          |
|-------------|-------|----------|----------|-------|----------|----------|
| YDJC        | -0.26 | 4.09E-01 | 1.00E+00 | 0.13  | 6.27E-01 | 9.45E-01 |
| FNIP2       | 0.39  | 5.15E-02 | 1.00E+00 | 0.15  | 6.27E-01 | 9.45E-01 |
| CCDC61      | -0.24 | 3.57E-01 | 1.00E+00 | -0.35 | 6.27E-01 | 9.45E-01 |
| RARS2       | 0.09  | 6.72E-01 | 1.00E+00 | -0.14 | 6.28E-01 | 9.45E-01 |
| XLOC_008405 | -1.76 | 3.38E-01 | 1.00E+00 | 0.52  | 6.28E-01 | 9.45E-01 |
| OSTC        | 0.23  | 1.89E-01 | 1.00E+00 | -0.17 | 6.28E-01 | 9.45E-01 |
| HYKK        | -0.07 | 8.64E-01 | 1.00E+00 | -0.21 | 6.28E-01 | 9.45E-01 |
| COL9A3      | -0.09 | 7.89E-01 | 1.00E+00 | 0.22  | 6.28E-01 | 9.45E-01 |
| PATJ        | 0.15  | 5.66E-01 | 1.00E+00 | -0.16 | 6.28E-01 | 9.45E-01 |
| RGS11       | 0.21  | 7.78E-01 | 1.00E+00 | 0.57  | 6.28E-01 | 9.45E-01 |
| DDX46       | 0.06  | 7.87E-01 | 1.00E+00 | 0.10  | 6.28E-01 | 9.45E-01 |
| CDC20       | 0.30  | 3.76E-01 | 1.00E+00 | 0.23  | 6.28E-01 | 9.45E-01 |
| AL353771.1  | 0.56  | 8.73E-01 | 1.00E+00 | 0.50  | 6.28E-01 | 9.45E-01 |
| ZNF446      | 0.05  | 8.55E-01 | 1.00E+00 | 0.18  | 6.28E-01 | 9.45E-01 |
| KRTCAP3     | -0.21 | 4.81E-01 | 1.00E+00 | -0.23 | 6.28E-01 | 9.45E-01 |
| ZNF571      | 0.03  | 9.47E-01 | 1.00E+00 | -0.21 | 6.28E-01 | 9.45E-01 |
| AC026202.2  | -0.96 | 7.78E-01 | 1.00E+00 | -0.57 | 6.28E-01 | 9.45E-01 |
| TCEAL6      | 0.71  | 6.28E-01 | 1.00E+00 | 0.42  | 6.28E-01 | 9.45E-01 |
| YTHDC2      | 0.03  | 9.14E-01 | 1.00E+00 | -0.14 | 6.28E-01 | 9.45E-01 |
| AL031595.3  | 1.49  | 2.72E-01 | 1.00E+00 | -0.39 | 6.28E-01 | 9.45E-01 |
| AL590399.4  | -0.22 | 7.98E-01 | 1.00E+00 | 0.47  | 6.28E-01 | 9.45E-01 |
| WDR46       | -0.28 | 1.67E-01 | 1.00E+00 | 0.09  | 6.28E-01 | 9.45E-01 |
| LINC00592   | -0.30 | 5.64E-01 | 1.00E+00 | -0.35 | 6.28E-01 | 9.45E-01 |
| LINC01546   | -0.69 | 3.37E-01 | 1.00E+00 | 0.38  | 6.28E-01 | 9.45E-01 |
| AC103736.1  | 2.28  | 5.03E-01 | 1.00E+00 | -0.65 | 6.28E-01 | 9.45E-01 |
| DNAL1       | 0.18  | 6.23E-01 | 1.00E+00 | -0.16 | 6.28E-01 | 9.45E-01 |
| MON1B       | -0.12 | 4.99E-01 | 1.00E+00 | 0.16  | 6.28E-01 | 9.45E-01 |
| CDH8        | -0.16 | 8.85E-01 | 1.00E+00 | 0.55  | 6.28E-01 | 9.45E-01 |
| MID1IP1-AS1 | 0.88  | 3.18E-01 | 1.00E+00 | 0.60  | 6.28E-01 | 9.45E-01 |
| GAMT        | -0.05 | 8.42E-01 | 1.00E+00 | -0.19 | 6.29E-01 | 9.45E-01 |
| ZNF250      | 0.23  | 4.19E-01 | 1.00E+00 | -0.14 | 6.29E-01 | 9.45E-01 |
| MSRB3       | 0.28  | 5.72E-01 | 1.00E+00 | -0.19 | 6.29E-01 | 9.45E-01 |

|                    |       |          |          |       |          |          |
|--------------------|-------|----------|----------|-------|----------|----------|
| <b>AC134312.5</b>  | -2.51 | 2.16E-02 | 8.94E-01 | 0.46  | 6.29E-01 | 9.45E-01 |
| <b>ZNF763</b>      | 0.56  | 5.00E-01 | 1.00E+00 | 0.24  | 6.29E-01 | 9.45E-01 |
| <b>AC023421.1</b>  | 1.20  | 5.15E-01 | 1.00E+00 | -0.71 | 6.29E-01 | 9.45E-01 |
| <b>ZDHHC6</b>      | 0.52  | 1.63E-01 | 1.00E+00 | 0.12  | 6.29E-01 | 9.45E-01 |
| <b>RPS17</b>       | -0.56 | 8.73E-01 | 1.00E+00 | 0.54  | 6.29E-01 | 9.45E-01 |
| <b>CWC15</b>       | -0.02 | 8.63E-01 | 1.00E+00 | -0.14 | 6.29E-01 | 9.45E-01 |
| <b>HBA1</b>        | 1.65  | 8.18E-03 | 5.56E-01 | -1.51 | 6.29E-01 | 9.45E-01 |
| <b>XLOC_009614</b> | 0.85  | 4.18E-01 | 1.00E+00 | -0.37 | 6.29E-01 | 9.45E-01 |
| <b>XLOC_008473</b> | -0.75 | 2.87E-01 | 1.00E+00 | 0.44  | 6.29E-01 | 9.45E-01 |
| <b>CLDN23</b>      | 0.03  | 9.44E-01 | 1.00E+00 | -0.25 | 6.29E-01 | 9.45E-01 |
| <b>SNAI2</b>       | -0.41 | 3.09E-02 | 1.00E+00 | 0.16  | 6.29E-01 | 9.45E-01 |
| <b>TCTN1</b>       | -0.14 | 5.65E-01 | 1.00E+00 | -0.18 | 6.29E-01 | 9.45E-01 |
| <b>ZDHHC7</b>      | 0.12  | 5.64E-01 | 1.00E+00 | 0.22  | 6.29E-01 | 9.45E-01 |
| <b>EMC3-AS1</b>    | -0.47 | 2.15E-01 | 1.00E+00 | 0.32  | 6.29E-01 | 9.45E-01 |
| <b>MAT2A</b>       | -0.04 | 9.18E-01 | 1.00E+00 | -0.22 | 6.29E-01 | 9.45E-01 |
| <b>SGMS1</b>       | -0.03 | 9.32E-01 | 1.00E+00 | -0.10 | 6.29E-01 | 9.45E-01 |
| <b>ATP9A</b>       | 0.57  | 2.35E-01 | 1.00E+00 | 0.16  | 6.29E-01 | 9.45E-01 |
| <b>AC016355.1</b>  | 0.47  | 3.41E-01 | 1.00E+00 | 0.25  | 6.29E-01 | 9.45E-01 |
| <b>GPRC5D</b>      | 0.75  | 3.88E-01 | 1.00E+00 | 0.53  | 6.29E-01 | 9.45E-01 |
| <b>AC099689.1</b>  | -0.86 | 7.99E-01 | 1.00E+00 | 0.77  | 6.29E-01 | 9.45E-01 |
| <b>GTF2A1</b>      | 0.15  | 5.64E-01 | 1.00E+00 | 0.15  | 6.29E-01 | 9.45E-01 |
| <b>ZNF850</b>      | -0.12 | 7.99E-01 | 1.00E+00 | -0.32 | 6.29E-01 | 9.45E-01 |
| <b>NUDT13</b>      | -0.21 | 7.15E-01 | 1.00E+00 | -0.30 | 6.29E-01 | 9.45E-01 |
| <b>MMP25-AS1</b>   | -0.43 | 3.30E-01 | 1.00E+00 | -0.27 | 6.29E-01 | 9.45E-01 |
| <b>HSDL2</b>       | 0.37  | 1.76E-01 | 1.00E+00 | -0.13 | 6.29E-01 | 9.45E-01 |
| <b>XLOC_012057</b> | -1.02 | 3.17E-01 | 1.00E+00 | 0.62  | 6.29E-01 | 9.45E-01 |
| <b>AC106782.2</b>  | 0.07  | 8.97E-01 | 1.00E+00 | 0.20  | 6.30E-01 | 9.45E-01 |
| <b>FAM13B</b>      | 0.18  | 5.44E-01 | 1.00E+00 | 0.16  | 6.30E-01 | 9.45E-01 |
| <b>PI4K2B</b>      | 0.16  | 6.18E-01 | 1.00E+00 | -0.17 | 6.30E-01 | 9.45E-01 |
| <b>ZFHX2</b>       | -0.05 | 9.25E-01 | 1.00E+00 | 0.37  | 6.30E-01 | 9.45E-01 |
| <b>TMEM204</b>     | 0.46  | 2.48E-01 | 1.00E+00 | 0.21  | 6.30E-01 | 9.45E-01 |
| <b>XLOC_014050</b> | 0.08  | 9.43E-01 | 1.00E+00 | -0.52 | 6.30E-01 | 9.45E-01 |

|             |       |          |          |       |          |          |
|-------------|-------|----------|----------|-------|----------|----------|
| LINC00662   | 0.57  | 9.00E-02 | 1.00E+00 | -0.14 | 6.30E-01 | 9.45E-01 |
| AP000662.1  | 0.80  | 2.34E-01 | 1.00E+00 | 0.45  | 6.30E-01 | 9.45E-01 |
| MAFG        | 0.29  | 1.63E-01 | 1.00E+00 | 0.19  | 6.30E-01 | 9.45E-01 |
| PLEK2       | -0.41 | 3.23E-01 | 1.00E+00 | -0.25 | 6.30E-01 | 9.45E-01 |
| MRPL54      | -0.16 | 5.06E-01 | 1.00E+00 | 0.09  | 6.30E-01 | 9.46E-01 |
| APLP1       | -1.64 | 2.10E-02 | 8.94E-01 | -0.44 | 6.30E-01 | 9.46E-01 |
| FBXW8       | -0.16 | 5.27E-01 | 1.00E+00 | 0.20  | 6.30E-01 | 9.46E-01 |
| BAIAP2      | -0.33 | 3.90E-01 | 1.00E+00 | 0.16  | 6.30E-01 | 9.46E-01 |
| LRSAM1      | -0.26 | 3.74E-01 | 1.00E+00 | 0.13  | 6.30E-01 | 9.46E-01 |
| SIRT1       | 0.30  | 2.27E-01 | 1.00E+00 | -0.17 | 6.30E-01 | 9.46E-01 |
| RPL7AP64    | 0.18  | 7.94E-01 | 1.00E+00 | 0.33  | 6.30E-01 | 9.46E-01 |
| G12735      | 0.72  | 3.33E-01 | 1.00E+00 | 0.53  | 6.30E-01 | 9.46E-01 |
| PKDREJ      | -0.32 | 2.67E-01 | 1.00E+00 | -0.40 | 6.30E-01 | 9.46E-01 |
| EIF5        | 0.35  | 2.19E-01 | 1.00E+00 | -0.12 | 6.30E-01 | 9.46E-01 |
| DCDC1       | -0.28 | 8.65E-01 | 1.00E+00 | -0.52 | 6.30E-01 | 9.46E-01 |
| C19orf25    | -0.14 | 5.21E-01 | 1.00E+00 | 0.11  | 6.31E-01 | 9.46E-01 |
| TXNDC9      | 0.08  | 7.26E-01 | 1.00E+00 | -0.21 | 6.31E-01 | 9.46E-01 |
| B3GALT5-AS1 | -0.51 | 4.52E-01 | 1.00E+00 | -1.30 | 6.31E-01 | 9.46E-01 |
| AC011451.1  | 0.81  | 2.96E-01 | 1.00E+00 | 0.30  | 6.31E-01 | 9.46E-01 |
| MYOM1       | 0.60  | 3.66E-01 | 1.00E+00 | -0.38 | 6.31E-01 | 9.46E-01 |
| UBL7        | -0.08 | 7.08E-01 | 1.00E+00 | -0.10 | 6.31E-01 | 9.46E-01 |
| AQR         | -0.07 | 7.18E-01 | 1.00E+00 | -0.13 | 6.31E-01 | 9.46E-01 |
| RPL13AP6    | -3.06 | 1.20E-01 | 1.00E+00 | -0.32 | 6.31E-01 | 9.46E-01 |
| XLOC_005482 | 0.88  | 6.32E-01 | 1.00E+00 | 0.35  | 6.31E-01 | 9.46E-01 |
| RASIP1      | -0.01 | 9.84E-01 | 1.00E+00 | -0.25 | 6.31E-01 | 9.46E-01 |
| THOP1       | -0.31 | 2.34E-01 | 1.00E+00 | 0.20  | 6.31E-01 | 9.46E-01 |
| SOX15       | -0.38 | 3.36E-01 | 1.00E+00 | 0.23  | 6.31E-01 | 9.46E-01 |
| AL354893.1  | 2.56  | 7.72E-02 | 1.00E+00 | -0.55 | 6.31E-01 | 9.46E-01 |
| XLOC_003153 | -0.16 | 9.17E-01 | 1.00E+00 | -0.50 | 6.31E-01 | 9.46E-01 |
| MAPK8       | -0.02 | 9.27E-01 | 1.00E+00 | 0.11  | 6.31E-01 | 9.46E-01 |
| PAN2        | -0.39 | 8.06E-02 | 1.00E+00 | -0.18 | 6.31E-01 | 9.46E-01 |
| SEC22B      | 0.21  | 4.44E-01 | 1.00E+00 | -0.18 | 6.31E-01 | 9.46E-01 |

|                    |       |          |          |       |          |          |
|--------------------|-------|----------|----------|-------|----------|----------|
| <b>RAB8B</b>       | 0.34  | 3.17E-01 | 1.00E+00 | 0.15  | 6.31E-01 | 9.46E-01 |
| <b>CWC27</b>       | -0.02 | 9.30E-01 | 1.00E+00 | -0.06 | 6.31E-01 | 9.46E-01 |
| <b>LINC01816</b>   | 0.43  | 6.64E-01 | 1.00E+00 | -0.33 | 6.31E-01 | 9.46E-01 |
| <b>YARS</b>        | -0.35 | 1.95E-01 | 1.00E+00 | 0.11  | 6.31E-01 | 9.46E-01 |
| <b>RNF41</b>       | 0.00  | 9.91E-01 | 1.00E+00 | 0.10  | 6.31E-01 | 9.46E-01 |
| <b>XLOC_014038</b> | -0.76 | 7.12E-01 | 1.00E+00 | 0.53  | 6.31E-01 | 9.46E-01 |
| <b>WSB1</b>        | 0.17  | 5.54E-01 | 1.00E+00 | 0.11  | 6.31E-01 | 9.46E-01 |
| <b>ANKRD55</b>     | -1.94 | 7.43E-02 | 1.00E+00 | 0.22  | 6.31E-01 | 9.46E-01 |
| <b>CENPH</b>       | -0.35 | 1.29E-01 | 1.00E+00 | -0.14 | 6.31E-01 | 9.46E-01 |
| <b>GPX1P1</b>      | 1.27  | 1.24E-01 | 1.00E+00 | 0.29  | 6.32E-01 | 9.46E-01 |
| <b>SMG7-AS1</b>    | 0.19  | 8.14E-01 | 1.00E+00 | 0.68  | 6.32E-01 | 9.46E-01 |
| <b>KIF1A</b>       | -1.06 | 1.34E-01 | 1.00E+00 | -0.40 | 6.32E-01 | 9.46E-01 |
| <b>DCST1-AS1</b>   | -0.21 | 6.38E-01 | 1.00E+00 | -0.21 | 6.32E-01 | 9.46E-01 |
| <b>FAM83C-AS1</b>  | -0.08 | 9.06E-01 | 1.00E+00 | 0.41  | 6.32E-01 | 9.46E-01 |
| <b>KDELR3</b>      | -0.22 | 6.91E-01 | 1.00E+00 | 0.21  | 6.32E-01 | 9.46E-01 |
| <b>AC089984.2</b>  | 1.61  | 1.01E-01 | 1.00E+00 | 0.41  | 6.32E-01 | 9.46E-01 |
| <b>LEAP2</b>       | -2.53 | 3.34E-01 | 1.00E+00 | -0.45 | 6.32E-01 | 9.46E-01 |
| <b>KDELR1</b>      | -0.02 | 9.13E-01 | 1.00E+00 | 0.11  | 6.32E-01 | 9.46E-01 |
| <b>DPYS</b>        | 0.83  | 6.12E-01 | 1.00E+00 | 0.66  | 6.32E-01 | 9.46E-01 |
| <b>SLC5A6</b>      | 0.34  | 4.18E-01 | 1.00E+00 | -0.20 | 6.32E-01 | 9.46E-01 |
| <b>ZFPM1</b>       | -0.64 | 1.49E-01 | 1.00E+00 | 0.49  | 6.32E-01 | 9.46E-01 |
| <b>PAGE5</b>       | 0.36  | 9.17E-01 | 1.00E+00 | -0.65 | 6.32E-01 | 9.46E-01 |
| <b>MOV10</b>       | -0.15 | 6.50E-01 | 1.00E+00 | 0.19  | 6.32E-01 | 9.46E-01 |
| <b>CHGB</b>        | -3.80 | 1.62E-03 | 2.24E-01 | -0.65 | 6.32E-01 | 9.46E-01 |
| <b>SEC23B</b>      | -0.13 | 5.24E-01 | 1.00E+00 | -0.09 | 6.32E-01 | 9.46E-01 |
| <b>LINC02015</b>   | 1.07  | 7.55E-01 | 1.00E+00 | 0.70  | 6.32E-01 | 9.46E-01 |
| <b>ABCG2</b>       | 0.69  | 1.10E-01 | 1.00E+00 | 0.31  | 6.32E-01 | 9.46E-01 |
| <b>IGLV3-9</b>     | 2.01  | 3.24E-01 | 1.00E+00 | 1.53  | 6.32E-01 | 9.46E-01 |
| <b>EXOC3</b>       | -0.08 | 6.41E-01 | 1.00E+00 | 0.14  | 6.32E-01 | 9.46E-01 |
| <b>ACAP3</b>       | -0.33 | 3.21E-01 | 1.00E+00 | -0.33 | 6.32E-01 | 9.46E-01 |
| <b>AL355490.1</b>  | -0.41 | 7.48E-01 | 1.00E+00 | 0.52  | 6.32E-01 | 9.46E-01 |
| <b>FTOP1</b>       | 0.84  | 4.79E-01 | 1.00E+00 | -0.36 | 6.33E-01 | 9.46E-01 |

|                    |       |          |          |       |          |          |
|--------------------|-------|----------|----------|-------|----------|----------|
| <b>HSF4</b>        | 0.32  | 4.15E-01 | 1.00E+00 | 0.40  | 6.33E-01 | 9.46E-01 |
| <b>KIAA0232</b>    | 0.23  | 3.71E-01 | 1.00E+00 | 0.19  | 6.33E-01 | 9.46E-01 |
| <b>MTX1P1</b>      | 0.00  | 1.00E+00 | 1.00E+00 | 0.35  | 6.33E-01 | 9.46E-01 |
| <b>FOXCUT</b>      | 0.28  | 5.16E-01 | 1.00E+00 | -0.42 | 6.33E-01 | 9.46E-01 |
| <b>ZNF582</b>      | 0.31  | 4.49E-01 | 1.00E+00 | -0.19 | 6.33E-01 | 9.46E-01 |
| <b>WASHC2C</b>     | -0.19 | 2.71E-01 | 1.00E+00 | 0.17  | 6.33E-01 | 9.46E-01 |
| <b>GPR34</b>       | 1.05  | 1.20E-01 | 1.00E+00 | -0.31 | 6.33E-01 | 9.46E-01 |
| <b>GNAS</b>        | -0.10 | 6.88E-01 | 1.00E+00 | -0.21 | 6.33E-01 | 9.46E-01 |
| <b>AC015813.1</b>  | 1.42  | 1.60E-01 | 1.00E+00 | -0.46 | 6.33E-01 | 9.46E-01 |
| <b>AC105760.2</b>  | -0.38 | 4.37E-01 | 1.00E+00 | -0.30 | 6.33E-01 | 9.46E-01 |
| <b>LINC01170</b>   | 0.69  | 3.62E-01 | 1.00E+00 | 0.40  | 6.33E-01 | 9.46E-01 |
| <b>AL162724.2</b>  | -2.24 | 1.48E-01 | 1.00E+00 | -0.44 | 6.33E-01 | 9.46E-01 |
| <b>MTA3</b>        | 0.06  | 7.65E-01 | 1.00E+00 | -0.11 | 6.33E-01 | 9.46E-01 |
| <b>PCK1</b>        | 1.62  | 6.13E-01 | 1.00E+00 | -1.49 | 6.33E-01 | 9.46E-01 |
| <b>FAM136A</b>     | -0.02 | 9.38E-01 | 1.00E+00 | -0.11 | 6.33E-01 | 9.46E-01 |
| <b>CHMP5</b>       | 0.41  | 1.24E-01 | 1.00E+00 | 0.10  | 6.33E-01 | 9.46E-01 |
| <b>SCAF4</b>       | -0.27 | 3.01E-01 | 1.00E+00 | -0.13 | 6.33E-01 | 9.46E-01 |
| <b>TBCE</b>        | 0.09  | 5.92E-01 | 1.00E+00 | -0.08 | 6.33E-01 | 9.46E-01 |
| <b>MFN2</b>        | -0.07 | 7.14E-01 | 1.00E+00 | -0.16 | 6.33E-01 | 9.46E-01 |
| <b>PPIL1</b>       | -0.21 | 3.72E-01 | 1.00E+00 | 0.10  | 6.34E-01 | 9.46E-01 |
| <b>LINC00393</b>   | -0.13 | 8.53E-01 | 1.00E+00 | -0.35 | 6.34E-01 | 9.46E-01 |
| <b>SDE2</b>        | 0.08  | 7.49E-01 | 1.00E+00 | 0.09  | 6.34E-01 | 9.46E-01 |
| <b>AURKA</b>       | 0.29  | 4.04E-01 | 1.00E+00 | 0.25  | 6.34E-01 | 9.46E-01 |
| <b>CLN5</b>        | -0.15 | 4.97E-01 | 1.00E+00 | -0.12 | 6.34E-01 | 9.46E-01 |
| <b>APOC1</b>       | 1.01  | 9.84E-02 | 1.00E+00 | 0.33  | 6.34E-01 | 9.46E-01 |
| <b>WT1</b>         | NA    | NA       | NA       | 1.53  | 6.34E-01 | 9.46E-01 |
| <b>COLEC12</b>     | 0.05  | 8.86E-01 | 1.00E+00 | 0.31  | 6.34E-01 | 9.46E-01 |
| <b>CLCNKB</b>      | 0.32  | 7.34E-01 | 1.00E+00 | -0.49 | 6.34E-01 | 9.46E-01 |
| <b>XLOC_005560</b> | -2.54 | 2.15E-02 | 8.94E-01 | -0.74 | 6.34E-01 | 9.46E-01 |
| <b>C6orf226</b>    | -0.12 | 7.09E-01 | 1.00E+00 | 0.13  | 6.34E-01 | 9.46E-01 |
| <b>BRD4</b>        | -0.43 | 1.70E-01 | 1.00E+00 | 0.16  | 6.34E-01 | 9.46E-01 |
| <b>3-Mar</b>       | 0.26  | 5.81E-01 | 1.00E+00 | 0.17  | 6.34E-01 | 9.46E-01 |

|            |       |          |          |       |          |          |
|------------|-------|----------|----------|-------|----------|----------|
| LINC00670  | -1.96 | 5.26E-01 | 1.00E+00 | -0.62 | 6.34E-01 | 9.46E-01 |
| PROX1-AS1  | -0.53 | 7.42E-01 | 1.00E+00 | 0.64  | 6.34E-01 | 9.46E-01 |
| G39215     | 0.21  | 7.80E-01 | 1.00E+00 | -0.33 | 6.34E-01 | 9.46E-01 |
| AL353804.1 | -0.59 | 4.19E-01 | 1.00E+00 | 0.33  | 6.34E-01 | 9.46E-01 |
| LPP        | 0.07  | 8.59E-01 | 1.00E+00 | -0.15 | 6.34E-01 | 9.46E-01 |
| AL139247.1 | 0.28  | 7.88E-01 | 1.00E+00 | -0.35 | 6.34E-01 | 9.46E-01 |
| FAM162A    | -0.28 | 1.92E-01 | 1.00E+00 | -0.15 | 6.34E-01 | 9.46E-01 |
| ESCO1      | -0.05 | 8.62E-01 | 1.00E+00 | -0.15 | 6.34E-01 | 9.46E-01 |
| IGLV10-54  | 4.15  | 3.81E-02 | 1.00E+00 | 1.52  | 6.34E-01 | 9.46E-01 |
| SPOCK1     | 0.29  | 6.80E-01 | 1.00E+00 | 0.25  | 6.34E-01 | 9.46E-01 |
| C10orf111  | -0.89 | 7.97E-01 | 1.00E+00 | 0.38  | 6.34E-01 | 9.46E-01 |
| ZNF667     | 0.08  | 8.50E-01 | 1.00E+00 | -0.19 | 6.34E-01 | 9.46E-01 |
| RNU4-47P   | 0.01  | 9.89E-01 | 1.00E+00 | 0.35  | 6.35E-01 | 9.46E-01 |
| OR2I1P     | -1.55 | 5.89E-02 | 1.00E+00 | 1.49  | 6.35E-01 | 9.46E-01 |
| PTPRR      | -0.88 | 3.59E-01 | 1.00E+00 | 0.36  | 6.35E-01 | 9.46E-01 |
| FOXO6      | -0.69 | 6.75E-02 | 1.00E+00 | -0.40 | 6.35E-01 | 9.46E-01 |
| EPHX3      | -0.11 | 8.32E-01 | 1.00E+00 | 0.26  | 6.35E-01 | 9.46E-01 |
| ATIC       | -0.13 | 6.39E-01 | 1.00E+00 | -0.10 | 6.35E-01 | 9.46E-01 |
| AC145098.2 | -2.33 | 6.40E-02 | 1.00E+00 | -0.57 | 6.35E-01 | 9.46E-01 |
| G38688     | -1.08 | 5.40E-01 | 1.00E+00 | 0.46  | 6.35E-01 | 9.46E-01 |
| TBCA       | 0.21  | 1.75E-01 | 1.00E+00 | -0.07 | 6.35E-01 | 9.46E-01 |
| RPL5P4     | 1.10  | 4.85E-01 | 1.00E+00 | -0.33 | 6.35E-01 | 9.46E-01 |
| ACSBG2     | -1.83 | 2.59E-01 | 1.00E+00 | -0.59 | 6.35E-01 | 9.46E-01 |
| AC087071.2 | -0.29 | 9.01E-01 | 1.00E+00 | -0.45 | 6.35E-01 | 9.46E-01 |
| ACTG1P9    | -1.37 | 6.93E-01 | 1.00E+00 | 0.59  | 6.35E-01 | 9.46E-01 |
| MORN4      | -0.04 | 8.92E-01 | 1.00E+00 | 0.15  | 6.35E-01 | 9.46E-01 |
| NBL1       | 0.11  | 6.68E-01 | 1.00E+00 | 0.25  | 6.35E-01 | 9.46E-01 |
| EPHB4      | -0.24 | 2.42E-01 | 1.00E+00 | 0.23  | 6.35E-01 | 9.46E-01 |
| ANXA2P1    | -1.10 | 7.18E-01 | 1.00E+00 | -0.28 | 6.35E-01 | 9.46E-01 |
| GTPBP8     | -0.14 | 5.94E-01 | 1.00E+00 | -0.11 | 6.35E-01 | 9.46E-01 |
| NUTF2      | -0.02 | 8.85E-01 | 1.00E+00 | 0.06  | 6.35E-01 | 9.46E-01 |
| AGR2       | 0.62  | 1.92E-01 | 1.00E+00 | -0.31 | 6.35E-01 | 9.46E-01 |

|                    |       |          |          |       |          |          |
|--------------------|-------|----------|----------|-------|----------|----------|
| <b>MXD3</b>        | 0.21  | 6.54E-01 | 1.00E+00 | 0.15  | 6.35E-01 | 9.46E-01 |
| <b>AL035258.1</b>  | -3.19 | 1.00E-02 | 6.22E-01 | 0.52  | 6.36E-01 | 9.46E-01 |
| <b>AATBC</b>       | -1.25 | 8.71E-03 | 5.76E-01 | -0.33 | 6.36E-01 | 9.46E-01 |
| <b>GGCX</b>        | 0.05  | 8.06E-01 | 1.00E+00 | -0.10 | 6.36E-01 | 9.46E-01 |
| <b>RBM12B-AS1</b>  | 1.08  | 4.02E-01 | 1.00E+00 | 0.57  | 6.36E-01 | 9.46E-01 |
| <b>LINC01232</b>   | -0.17 | 7.54E-01 | 1.00E+00 | 0.39  | 6.36E-01 | 9.46E-01 |
| <b>XLOC_003514</b> | -1.11 | 3.60E-01 | 1.00E+00 | 1.50  | 6.36E-01 | 9.46E-01 |
| <b>KIF2A</b>       | -0.25 | 2.48E-01 | 1.00E+00 | -0.08 | 6.36E-01 | 9.46E-01 |
| <b>AC093627.5</b>  | -0.44 | 3.31E-01 | 1.00E+00 | -0.28 | 6.36E-01 | 9.46E-01 |
| <b>CDKN1A</b>      | -1.18 | 4.31E-02 | 1.00E+00 | 0.17  | 6.36E-01 | 9.46E-01 |
| <b>YEATS4</b>      | -0.09 | 7.23E-01 | 1.00E+00 | -0.15 | 6.36E-01 | 9.46E-01 |
| <b>ISG20L2</b>     | -0.11 | 5.87E-01 | 1.00E+00 | 0.13  | 6.36E-01 | 9.46E-01 |
| <b>HDAC8</b>       | 0.21  | 5.28E-01 | 1.00E+00 | -0.15 | 6.36E-01 | 9.46E-01 |
| <b>BBS12</b>       | 0.37  | 2.27E-01 | 1.00E+00 | 0.22  | 6.36E-01 | 9.46E-01 |
| <b>WARS2</b>       | 0.15  | 6.16E-01 | 1.00E+00 | 0.11  | 6.36E-01 | 9.46E-01 |
| <b>E2F2</b>        | 0.11  | 6.41E-01 | 1.00E+00 | 0.23  | 6.36E-01 | 9.46E-01 |
| <b>SIAH2-AS1</b>   | 2.34  | 7.92E-02 | 1.00E+00 | 0.46  | 6.36E-01 | 9.46E-01 |
| <b>EGR4</b>        | -3.43 | 1.97E-02 | 8.79E-01 | 0.86  | 6.36E-01 | 9.46E-01 |
| <b>LYPLA2P1</b>    | -0.05 | 9.88E-01 | 1.00E+00 | 0.27  | 6.36E-01 | 9.46E-01 |
| <b>WDR63</b>       | -0.08 | 8.46E-01 | 1.00E+00 | 0.28  | 6.36E-01 | 9.46E-01 |
| <b>AC107027.1</b>  | 1.50  | 6.62E-01 | 1.00E+00 | 0.95  | 6.36E-01 | 9.46E-01 |
| <b>CCDC92</b>      | 0.03  | 9.53E-01 | 1.00E+00 | -0.27 | 6.36E-01 | 9.46E-01 |
| <b>C2orf88</b>     | 0.34  | 5.55E-01 | 1.00E+00 | -0.15 | 6.36E-01 | 9.46E-01 |
| <b>KRTAP17-1</b>   | -5.57 | 8.91E-02 | 1.00E+00 | -1.51 | 6.36E-01 | 9.46E-01 |
| <b>CLIC2</b>       | -0.24 | 4.28E-01 | 1.00E+00 | 0.15  | 6.36E-01 | 9.46E-01 |
| <b>TMEM236</b>     | -3.00 | 9.18E-02 | 1.00E+00 | -0.64 | 6.36E-01 | 9.46E-01 |
| <b>SDCBP</b>       | 0.37  | 2.35E-01 | 1.00E+00 | -0.17 | 6.36E-01 | 9.46E-01 |
| <b>PLEKHF2</b>     | 0.15  | 5.69E-01 | 1.00E+00 | -0.17 | 6.36E-01 | 9.46E-01 |
| <b>PDK1</b>        | -0.20 | 5.69E-01 | 1.00E+00 | -0.16 | 6.36E-01 | 9.46E-01 |
| <b>OR14L1P</b>     | -1.01 | 7.18E-01 | 1.00E+00 | -1.10 | 6.36E-01 | 9.46E-01 |
| <b>CD300LB</b>     | 0.84  | 3.60E-01 | 1.00E+00 | 0.45  | 6.36E-01 | 9.46E-01 |
| <b>L1CAM</b>       | -0.31 | 2.51E-01 | 1.00E+00 | 0.33  | 6.36E-01 | 9.46E-01 |



|                   |       |          |          |       |          |          |
|-------------------|-------|----------|----------|-------|----------|----------|
| <b>C2orf42</b>    | 0.00  | 9.88E-01 | 1.00E+00 | -0.13 | 6.37E-01 | 9.46E-01 |
| <b>RDH11</b>      | 0.04  | 8.59E-01 | 1.00E+00 | -0.13 | 6.37E-01 | 9.46E-01 |
| <b>ZNF559</b>     | 0.20  | 5.24E-01 | 1.00E+00 | -0.16 | 6.37E-01 | 9.46E-01 |
| <b>ESAM</b>       | -0.28 | 5.27E-01 | 1.00E+00 | -0.24 | 6.37E-01 | 9.46E-01 |
| <b>EXD2</b>       | 0.09  | 7.13E-01 | 1.00E+00 | 0.12  | 6.37E-01 | 9.46E-01 |
| <b>SLC25A53</b>   | 0.12  | 7.47E-01 | 1.00E+00 | 0.14  | 6.37E-01 | 9.46E-01 |
| <b>PTMS</b>       | -0.26 | 2.59E-01 | 1.00E+00 | -0.29 | 6.37E-01 | 9.46E-01 |
| <b>ZSWIM1</b>     | -0.36 | 2.11E-01 | 1.00E+00 | -0.20 | 6.37E-01 | 9.46E-01 |
| <b>MRPL36</b>     | 0.11  | 6.59E-01 | 1.00E+00 | -0.17 | 6.37E-01 | 9.46E-01 |
| <b>DEPDC1</b>     | 0.10  | 8.34E-01 | 1.00E+00 | -0.27 | 6.37E-01 | 9.46E-01 |
| <b>G1920</b>      | 2.68  | 1.92E-02 | 8.71E-01 | -0.62 | 6.37E-01 | 9.46E-01 |
| <b>QRSL1P3</b>    | NA    | NA       | NA       | -0.44 | 6.37E-01 | 9.46E-01 |
| <b>NPRL3</b>      | 0.05  | 8.65E-01 | 1.00E+00 | 0.12  | 6.37E-01 | 9.46E-01 |
| <b>LINC02147</b>  | -1.80 | 2.82E-01 | 1.00E+00 | 0.57  | 6.37E-01 | 9.46E-01 |
| <b>MBOAT2</b>     | 0.09  | 8.27E-01 | 1.00E+00 | -0.20 | 6.37E-01 | 9.46E-01 |
| <b>IL7</b>        | 0.11  | 8.14E-01 | 1.00E+00 | 0.18  | 6.37E-01 | 9.46E-01 |
| <b>PHGDH</b>      | -0.31 | 3.56E-01 | 1.00E+00 | -0.14 | 6.37E-01 | 9.46E-01 |
| <b>SPINK6</b>     | -2.82 | 1.17E-01 | 1.00E+00 | 1.48  | 6.37E-01 | 9.46E-01 |
| <b>AC104695.3</b> | -4.33 | 1.86E-02 | 8.56E-01 | 0.30  | 6.37E-01 | 9.46E-01 |
| <b>SPINT1</b>     | -0.19 | 5.12E-01 | 1.00E+00 | -0.20 | 6.37E-01 | 9.46E-01 |
| <b>LINC01238</b>  | -0.77 | 4.98E-01 | 1.00E+00 | -0.51 | 6.37E-01 | 9.46E-01 |
| <b>ZEB1</b>       | 0.34  | 4.90E-01 | 1.00E+00 | -0.20 | 6.37E-01 | 9.46E-01 |
| <b>ADAMTSL5</b>   | 0.37  | 5.39E-01 | 1.00E+00 | 0.28  | 6.37E-01 | 9.46E-01 |
| <b>RBM4B</b>      | 0.27  | 4.64E-01 | 1.00E+00 | -0.13 | 6.37E-01 | 9.46E-01 |
| <b>AC121761.2</b> | -0.57 | 5.83E-01 | 1.00E+00 | -0.40 | 6.38E-01 | 9.47E-01 |
| <b>ELAC2</b>      | -0.11 | 5.71E-01 | 1.00E+00 | -0.07 | 6.38E-01 | 9.47E-01 |
| <b>AC123595.1</b> | -0.64 | 6.40E-01 | 1.00E+00 | 0.48  | 6.38E-01 | 9.47E-01 |
| <b>LPAR2</b>      | 0.15  | 6.66E-01 | 1.00E+00 | 0.18  | 6.38E-01 | 9.47E-01 |
| <b>CCDC28A</b>    | 0.25  | 3.95E-01 | 1.00E+00 | -0.14 | 6.38E-01 | 9.47E-01 |
| <b>STON1</b>      | 0.20  | 5.95E-01 | 1.00E+00 | 0.27  | 6.38E-01 | 9.47E-01 |
| <b>PPIL3</b>      | -0.14 | 6.78E-01 | 1.00E+00 | -0.13 | 6.38E-01 | 9.47E-01 |
| <b>G9812</b>      | -1.70 | 2.76E-01 | 1.00E+00 | 0.64  | 6.38E-01 | 9.47E-01 |

|                    |        |          |          |       |          |          |
|--------------------|--------|----------|----------|-------|----------|----------|
| <b>XLOC_013825</b> | 2.22   | 4.96E-01 | 1.00E+00 | 0.76  | 6.38E-01 | 9.47E-01 |
| <b>BCL11A</b>      | -0.18  | 5.61E-01 | 1.00E+00 | -0.28 | 6.38E-01 | 9.47E-01 |
| <b>POLRMT</b>      | -0.50  | 7.19E-02 | 1.00E+00 | -0.29 | 6.38E-01 | 9.47E-01 |
| <b>AC007611.1</b>  | 0.30   | 6.80E-01 | 1.00E+00 | -0.38 | 6.38E-01 | 9.47E-01 |
| <b>RAB11FIP2</b>   | 0.37   | 2.13E-01 | 1.00E+00 | 0.09  | 6.38E-01 | 9.47E-01 |
| <b>FABP9</b>       | -3.65  | 2.76E-01 | 1.00E+00 | -1.49 | 6.38E-01 | 9.47E-01 |
| <b>AL161719.1</b>  | -1.05  | 4.32E-01 | 1.00E+00 | 0.53  | 6.38E-01 | 9.47E-01 |
| <b>ZNF684</b>      | -0.01  | 9.75E-01 | 1.00E+00 | 0.12  | 6.38E-01 | 9.47E-01 |
| <b>AC112907.2</b>  | -0.41  | 6.78E-01 | 1.00E+00 | 0.44  | 6.38E-01 | 9.47E-01 |
| <b>ZNF175</b>      | 0.29   | 4.50E-01 | 1.00E+00 | 0.21  | 6.38E-01 | 9.47E-01 |
| <b>SMCHD1</b>      | 0.24   | 3.76E-01 | 1.00E+00 | 0.22  | 6.38E-01 | 9.47E-01 |
| <b>GVQW2</b>       | -3.00  | 1.01E-01 | 1.00E+00 | 0.48  | 6.38E-01 | 9.47E-01 |
| <b>GLIDR</b>       | 0.59   | 1.47E-01 | 1.00E+00 | 0.22  | 6.38E-01 | 9.47E-01 |
| <b>ZNF544</b>      | 0.12   | 6.95E-01 | 1.00E+00 | -0.12 | 6.39E-01 | 9.47E-01 |
| <b>GABRR1</b>      | -1.44  | 2.05E-01 | 1.00E+00 | -1.19 | 6.39E-01 | 9.47E-01 |
| <b>INPP4A</b>      | -0.01  | 9.72E-01 | 1.00E+00 | 0.24  | 6.39E-01 | 9.47E-01 |
| <b>AC127537.1</b>  | 2.35   | 1.90E-02 | 8.67E-01 | 0.63  | 6.39E-01 | 9.47E-01 |
| <b>AARS2</b>       | -0.12  | 5.34E-01 | 1.00E+00 | 0.25  | 6.39E-01 | 9.47E-01 |
| <b>LYPLA1P3</b>    | -0.93  | 7.86E-01 | 1.00E+00 | -0.26 | 6.39E-01 | 9.47E-01 |
| <b>ORC3</b>        | 0.11   | 5.34E-01 | 1.00E+00 | -0.13 | 6.39E-01 | 9.47E-01 |
| <b>AC092745.2</b>  | 0.65   | 3.75E-01 | 1.00E+00 | -0.42 | 6.39E-01 | 9.47E-01 |
| <b>KRTAP4-7</b>    | -30.00 | 6.80E-18 | 5.56E-15 | -1.50 | 6.39E-01 | 9.47E-01 |
| <b>C2orf16</b>     | 0.47   | 4.57E-01 | 1.00E+00 | 0.39  | 6.39E-01 | 9.47E-01 |
| <b>PPARA</b>       | 0.43   | 1.90E-01 | 1.00E+00 | 0.15  | 6.39E-01 | 9.47E-01 |
| <b>AMOT</b>        | 0.23   | 5.53E-01 | 1.00E+00 | -0.25 | 6.39E-01 | 9.47E-01 |
| <b>AC092117.2</b>  | 0.39   | 7.72E-01 | 1.00E+00 | -0.61 | 6.39E-01 | 9.47E-01 |
| <b>PNN</b>         | -0.31  | 1.50E-01 | 1.00E+00 | 0.11  | 6.39E-01 | 9.47E-01 |
| <b>IL12RB2</b>     | -0.87  | 7.39E-02 | 1.00E+00 | 0.32  | 6.39E-01 | 9.47E-01 |
| <b>HAX1</b>        | -0.01  | 9.51E-01 | 1.00E+00 | -0.08 | 6.39E-01 | 9.47E-01 |
| <b>HENMT1</b>      | 0.21   | 4.95E-01 | 1.00E+00 | -0.16 | 6.39E-01 | 9.47E-01 |
| <b>FBXO8</b>       | 0.42   | 6.44E-02 | 1.00E+00 | -0.11 | 6.40E-01 | 9.47E-01 |
| <b>WIPF3</b>       | -0.23  | 5.71E-01 | 1.00E+00 | 0.20  | 6.40E-01 | 9.47E-01 |

|            |       |          |          |       |          |          |
|------------|-------|----------|----------|-------|----------|----------|
| AHSP       | -1.45 | 6.70E-01 | 1.00E+00 | -0.52 | 6.40E-01 | 9.47E-01 |
| TRDN       | 1.94  | 1.18E-01 | 1.00E+00 | -1.48 | 6.40E-01 | 9.47E-01 |
| KRTAP16-1  | -5.34 | 1.03E-01 | 1.00E+00 | -1.50 | 6.40E-01 | 9.47E-01 |
| AC079035.1 | 0.80  | 8.15E-01 | 1.00E+00 | -0.48 | 6.40E-01 | 9.47E-01 |
| TTC30B     | 0.35  | 1.57E-01 | 1.00E+00 | -0.16 | 6.40E-01 | 9.47E-01 |
| MPP3       | -0.24 | 6.44E-01 | 1.00E+00 | -0.30 | 6.40E-01 | 9.47E-01 |
| THOC1      | 0.18  | 5.29E-01 | 1.00E+00 | -0.12 | 6.40E-01 | 9.47E-01 |
| ASCC3      | -0.14 | 5.86E-01 | 1.00E+00 | -0.15 | 6.40E-01 | 9.47E-01 |
| HMGCL      | 0.31  | 2.13E-01 | 1.00E+00 | -0.10 | 6.40E-01 | 9.47E-01 |
| AL139300.2 | -1.13 | 4.42E-01 | 1.00E+00 | 0.48  | 6.40E-01 | 9.47E-01 |
| SLC39A1    | 0.02  | 9.92E-01 | 1.00E+00 | 0.26  | 6.40E-01 | 9.47E-01 |
| SLCO3A1    | 0.17  | 3.39E-01 | 1.00E+00 | -0.13 | 6.40E-01 | 9.47E-01 |
| EXTL2      | 0.31  | 2.75E-01 | 1.00E+00 | 0.12  | 6.40E-01 | 9.47E-01 |
| IGLV4-69   | 2.11  | 5.31E-01 | 1.00E+00 | 1.03  | 6.40E-01 | 9.47E-01 |
| PSMA1      | 0.49  | 2.36E-01 | 1.00E+00 | -0.23 | 6.40E-01 | 9.47E-01 |
| HIGD1B     | -0.28 | 6.76E-01 | 1.00E+00 | 0.23  | 6.40E-01 | 9.47E-01 |
| AP005209.1 | -3.07 | 5.90E-02 | 1.00E+00 | -0.57 | 6.40E-01 | 9.47E-01 |
| IL1RL1     | 0.61  | 3.27E-01 | 1.00E+00 | 0.42  | 6.40E-01 | 9.47E-01 |
| USP42      | -0.27 | 3.33E-01 | 1.00E+00 | -0.21 | 6.40E-01 | 9.47E-01 |
| COLCA2     | 0.28  | 7.60E-01 | 1.00E+00 | 0.31  | 6.40E-01 | 9.47E-01 |
| UHRF2      | 0.47  | 2.54E-01 | 1.00E+00 | 0.29  | 6.40E-01 | 9.47E-01 |
| NFATC2     | -0.41 | 7.68E-02 | 1.00E+00 | 0.18  | 6.41E-01 | 9.47E-01 |
| RPL15P2    | -0.46 | 7.70E-01 | 1.00E+00 | -0.25 | 6.41E-01 | 9.47E-01 |
| LRRC56     | -0.25 | 5.49E-01 | 1.00E+00 | 0.43  | 6.41E-01 | 9.47E-01 |
| SPTA1      | -0.88 | 6.34E-01 | 1.00E+00 | -0.80 | 6.41E-01 | 9.47E-01 |
| CUL4A      | 0.17  | 5.13E-01 | 1.00E+00 | -0.08 | 6.41E-01 | 9.47E-01 |
| FAM198A    | 0.75  | 1.69E-01 | 1.00E+00 | 0.32  | 6.41E-01 | 9.47E-01 |
| AC099522.2 | -0.12 | 8.45E-01 | 1.00E+00 | -0.28 | 6.41E-01 | 9.47E-01 |
| AL807742.1 | 1.03  | 6.23E-01 | 1.00E+00 | -0.76 | 6.41E-01 | 9.47E-01 |
| NOMO1      | 0.05  | 8.57E-01 | 1.00E+00 | 0.25  | 6.41E-01 | 9.47E-01 |
| ZNF436-AS1 | 0.72  | 1.81E-01 | 1.00E+00 | -0.22 | 6.41E-01 | 9.47E-01 |
| CASP14     | 0.01  | 9.81E-01 | 1.00E+00 | 0.35  | 6.41E-01 | 9.47E-01 |

|             |       |          |          |       |          |          |
|-------------|-------|----------|----------|-------|----------|----------|
| ITGB4       | -0.37 | 1.26E-01 | 1.00E+00 | 0.27  | 6.41E-01 | 9.47E-01 |
| ATP2C2      | 0.18  | 7.33E-01 | 1.00E+00 | 0.28  | 6.41E-01 | 9.47E-01 |
| OAZ2        | -0.08 | 6.44E-01 | 1.00E+00 | -0.08 | 6.41E-01 | 9.47E-01 |
| G5264       | -0.77 | 1.84E-01 | 1.00E+00 | 0.30  | 6.41E-01 | 9.47E-01 |
| XLOC_009577 | -2.08 | 2.28E-01 | 1.00E+00 | 1.07  | 6.41E-01 | 9.47E-01 |
| CAPRIN2     | -0.07 | 7.67E-01 | 1.00E+00 | -0.17 | 6.41E-01 | 9.47E-01 |
| ATP2B4      | -0.02 | 9.10E-01 | 1.00E+00 | -0.10 | 6.41E-01 | 9.47E-01 |
| AL132639.2  | -0.01 | 9.91E-01 | 1.00E+00 | -0.27 | 6.41E-01 | 9.47E-01 |
| AC007785.1  | 0.44  | 6.37E-01 | 1.00E+00 | -0.38 | 6.41E-01 | 9.47E-01 |
| SELENOP     | 0.41  | 1.04E-01 | 1.00E+00 | 0.17  | 6.41E-01 | 9.47E-01 |
| ANXA2       | 0.13  | 5.40E-01 | 1.00E+00 | -0.11 | 6.41E-01 | 9.47E-01 |
| MAP3K20     | 0.31  | 2.89E-01 | 1.00E+00 | -0.13 | 6.41E-01 | 9.47E-01 |
| JADE3       | 0.21  | 3.98E-01 | 1.00E+00 | 0.21  | 6.41E-01 | 9.47E-01 |
| LRRC75B     | -0.55 | 1.59E-01 | 1.00E+00 | -0.24 | 6.41E-01 | 9.47E-01 |
| AL353759.1  | -0.27 | 8.40E-01 | 1.00E+00 | -0.42 | 6.41E-01 | 9.47E-01 |
| XLOC_005449 | 1.18  | 3.21E-01 | 1.00E+00 | -0.48 | 6.42E-01 | 9.47E-01 |
| AL136441.1  | -0.85 | 4.84E-01 | 1.00E+00 | -0.50 | 6.42E-01 | 9.47E-01 |
| APOLD1      | -0.45 | 5.32E-01 | 1.00E+00 | -0.33 | 6.42E-01 | 9.47E-01 |
| AC018804.1  | 0.15  | 9.11E-01 | 1.00E+00 | -0.36 | 6.42E-01 | 9.47E-01 |
| RPL3        | -0.31 | 3.74E-01 | 1.00E+00 | 0.15  | 6.42E-01 | 9.47E-01 |
| HAL         | -1.40 | 9.08E-02 | 1.00E+00 | 0.33  | 6.42E-01 | 9.47E-01 |
| BAZ1A       | -0.06 | 8.35E-01 | 1.00E+00 | 0.17  | 6.42E-01 | 9.47E-01 |
| PUS3        | 0.20  | 2.85E-01 | 1.00E+00 | 0.09  | 6.42E-01 | 9.47E-01 |
| GRHL3       | 0.17  | 7.66E-01 | 1.00E+00 | 0.25  | 6.42E-01 | 9.47E-01 |
| TANC1       | 0.16  | 6.35E-01 | 1.00E+00 | 0.14  | 6.42E-01 | 9.47E-01 |
| REX1BD      | -0.22 | 4.04E-01 | 1.00E+00 | 0.12  | 6.42E-01 | 9.47E-01 |
| AC083900.1  | -2.75 | 4.16E-01 | 1.00E+00 | -0.44 | 6.42E-01 | 9.47E-01 |
| AC091729.1  | -0.38 | 4.37E-01 | 1.00E+00 | -0.36 | 6.42E-01 | 9.47E-01 |
| AL035425.3  | 0.08  | 9.36E-01 | 1.00E+00 | 1.25  | 6.42E-01 | 9.47E-01 |
| SAFB        | -0.05 | 8.06E-01 | 1.00E+00 | 0.13  | 6.42E-01 | 9.47E-01 |
| NUP210      | -0.38 | 1.74E-01 | 1.00E+00 | 0.37  | 6.42E-01 | 9.47E-01 |
| SNORA73B    | 0.17  | 9.28E-01 | 1.00E+00 | -0.55 | 6.42E-01 | 9.47E-01 |

|                     |       |          |          |       |          |          |
|---------------------|-------|----------|----------|-------|----------|----------|
| <b>FAM66D</b>       | -0.78 | 3.51E-01 | 1.00E+00 | -0.44 | 6.42E-01 | 9.47E-01 |
| <b>SPATA18</b>      | 0.04  | 8.83E-01 | 1.00E+00 | 0.18  | 6.42E-01 | 9.47E-01 |
| <b>UNC13B</b>       | 0.15  | 4.03E-01 | 1.00E+00 | 0.17  | 6.42E-01 | 9.47E-01 |
| <b>SLC35B3</b>      | 0.31  | 2.06E-01 | 1.00E+00 | -0.12 | 6.42E-01 | 9.47E-01 |
| <b>XYLB</b>         | -0.31 | 3.78E-01 | 1.00E+00 | -0.17 | 6.42E-01 | 9.47E-01 |
| <b>TRMT61B</b>      | -0.14 | 5.16E-01 | 1.00E+00 | 0.12  | 6.42E-01 | 9.47E-01 |
| <b>DUSP5</b>        | -0.35 | 5.03E-01 | 1.00E+00 | 0.27  | 6.43E-01 | 9.47E-01 |
| <b>PIGO</b>         | -0.02 | 8.73E-01 | 1.00E+00 | -0.18 | 6.43E-01 | 9.47E-01 |
| <b>SH3PXD2A-AS1</b> | -0.52 | 2.99E-01 | 1.00E+00 | 0.27  | 6.43E-01 | 9.47E-01 |
| <b>LRRC37A6P</b>    | -0.14 | 8.50E-01 | 1.00E+00 | -0.51 | 6.43E-01 | 9.47E-01 |
| <b>GLRX3</b>        | -0.10 | 6.51E-01 | 1.00E+00 | -0.12 | 6.43E-01 | 9.47E-01 |
| <b>RPL21P39</b>     | 1.57  | 6.33E-01 | 1.00E+00 | -0.36 | 6.43E-01 | 9.47E-01 |
| <b>AC080112.1</b>   | -0.50 | 9.57E-02 | 1.00E+00 | 0.31  | 6.43E-01 | 9.47E-01 |
| <b>CSRNP3</b>       | -0.15 | 6.33E-01 | 1.00E+00 | -0.19 | 6.43E-01 | 9.47E-01 |
| <b>BFSP1</b>        | -1.11 | 2.48E-03 | 2.54E-01 | 0.32  | 6.43E-01 | 9.47E-01 |
| <b>NUP58</b>        | 0.23  | 4.99E-01 | 1.00E+00 | 0.14  | 6.43E-01 | 9.47E-01 |
| <b>GLT8D1</b>       | -0.07 | 7.75E-01 | 1.00E+00 | -0.10 | 6.43E-01 | 9.47E-01 |
| <b>MLLT3</b>        | -0.05 | 8.72E-01 | 1.00E+00 | -0.08 | 6.43E-01 | 9.47E-01 |
| <b>KRT27</b>        | -8.64 | 1.39E-07 | 5.62E-05 | -1.45 | 6.43E-01 | 9.47E-01 |
| <b>XLOC_005194</b>  | 4.12  | 1.35E-01 | 1.00E+00 | 0.91  | 6.43E-01 | 9.47E-01 |
| <b>CPEB1</b>        | 0.54  | 5.96E-01 | 1.00E+00 | 0.39  | 6.43E-01 | 9.47E-01 |
| <b>MAPK6-DT</b>     | -1.76 | 7.66E-02 | 1.00E+00 | -0.46 | 6.43E-01 | 9.47E-01 |
| <b>RAVER1</b>       | -0.45 | 3.26E-02 | 1.00E+00 | 0.41  | 6.43E-01 | 9.47E-01 |
| <b>MED31</b>        | 0.41  | 3.18E-01 | 1.00E+00 | -0.21 | 6.43E-01 | 9.47E-01 |
| <b>RP11-292F9.1</b> | -0.14 | 9.20E-01 | 1.00E+00 | 0.43  | 6.43E-01 | 9.47E-01 |
| <b>AC021054.1</b>   | -0.20 | 5.45E-01 | 1.00E+00 | -0.12 | 6.43E-01 | 9.47E-01 |
| <b>PGLYRP3</b>      | -0.12 | 7.63E-01 | 1.00E+00 | 0.30  | 6.43E-01 | 9.47E-01 |
| <b>H1FX</b>         | -0.94 | 1.63E-05 | 4.93E-03 | -0.35 | 6.43E-01 | 9.47E-01 |
| <b>TRIT1</b>        | 0.26  | 3.77E-01 | 1.00E+00 | 0.11  | 6.43E-01 | 9.47E-01 |
| <b>FYTTD1</b>       | 0.04  | 8.73E-01 | 1.00E+00 | -0.10 | 6.43E-01 | 9.47E-01 |
| <b>AC131571.1</b>   | -1.96 | 3.34E-01 | 1.00E+00 | -0.44 | 6.43E-01 | 9.47E-01 |
| <b>RPL9P7</b>       | -0.47 | 4.84E-01 | 1.00E+00 | 0.42  | 6.43E-01 | 9.47E-01 |

|                   |       |          |          |       |          |          |
|-------------------|-------|----------|----------|-------|----------|----------|
| <b>PSMD6-AS2</b>  | 0.28  | 7.59E-01 | 1.00E+00 | -0.30 | 6.43E-01 | 9.47E-01 |
| <b>AL121832.2</b> | -1.22 | 2.03E-02 | 8.88E-01 | 0.25  | 6.44E-01 | 9.47E-01 |
| <b>SSTR3</b>      | -0.68 | 7.19E-01 | 1.00E+00 | 1.48  | 6.44E-01 | 9.47E-01 |
| <b>SNX32</b>      | -1.06 | 3.56E-02 | 1.00E+00 | 0.24  | 6.44E-01 | 9.47E-01 |
| <b>SCN5A</b>      | -0.50 | 2.84E-01 | 1.00E+00 | -0.48 | 6.44E-01 | 9.47E-01 |
| <b>TSFM</b>       | -0.05 | 8.21E-01 | 1.00E+00 | 0.12  | 6.44E-01 | 9.47E-01 |
| <b>AL139082.1</b> | -1.23 | 4.44E-01 | 1.00E+00 | -0.70 | 6.44E-01 | 9.47E-01 |
| <b>SBNO1</b>      | 0.26  | 3.29E-01 | 1.00E+00 | -0.14 | 6.44E-01 | 9.47E-01 |
| <b>SBF2-AS1</b>   | -0.49 | 7.62E-02 | 1.00E+00 | -0.20 | 6.44E-01 | 9.47E-01 |
| <b>DGKQ</b>       | 0.13  | 6.36E-01 | 1.00E+00 | 0.26  | 6.44E-01 | 9.47E-01 |
| <b>DGCR2</b>      | 0.03  | 9.16E-01 | 1.00E+00 | -0.24 | 6.44E-01 | 9.47E-01 |
| <b>CIB1</b>       | -0.07 | 7.57E-01 | 1.00E+00 | -0.11 | 6.44E-01 | 9.47E-01 |
| <b>LINC00028</b>  | -1.65 | 6.30E-01 | 1.00E+00 | 0.52  | 6.44E-01 | 9.47E-01 |
| <b>VAT1</b>       | 0.05  | 7.94E-01 | 1.00E+00 | 0.14  | 6.44E-01 | 9.47E-01 |
| <b>MEF2C</b>      | 0.05  | 9.19E-01 | 1.00E+00 | 0.22  | 6.44E-01 | 9.47E-01 |
| <b>MIS12</b>      | 0.34  | 1.55E-01 | 1.00E+00 | -0.12 | 6.44E-01 | 9.47E-01 |
| <b>APPBP2</b>     | 0.11  | 5.46E-01 | 1.00E+00 | -0.10 | 6.44E-01 | 9.47E-01 |
| <b>MBOAT7</b>     | -0.37 | 8.25E-02 | 1.00E+00 | 0.20  | 6.44E-01 | 9.47E-01 |
| <b>AL031666.2</b> | 1.02  | 6.72E-01 | 1.00E+00 | 0.73  | 6.44E-01 | 9.47E-01 |
| <b>LINC00960</b>  | -0.51 | 8.74E-01 | 1.00E+00 | -0.39 | 6.44E-01 | 9.47E-01 |
| <b>RANBP17</b>    | 0.64  | 5.87E-01 | 1.00E+00 | 0.36  | 6.44E-01 | 9.47E-01 |
| <b>CPA3</b>       | 0.77  | 1.76E-01 | 1.00E+00 | 0.31  | 6.44E-01 | 9.47E-01 |
| <b>SPAG5-AS1</b>  | 1.80  | 3.14E-01 | 1.00E+00 | 0.47  | 6.44E-01 | 9.47E-01 |
| <b>AP003498.2</b> | 0.02  | 9.63E-01 | 1.00E+00 | -0.28 | 6.44E-01 | 9.47E-01 |
| <b>KTN1</b>       | -0.21 | 5.35E-01 | 1.00E+00 | -0.13 | 6.44E-01 | 9.47E-01 |
| <b>AL359265.3</b> | 0.62  | 4.33E-01 | 1.00E+00 | 0.36  | 6.44E-01 | 9.47E-01 |
| <b>AC027329.1</b> | 1.33  | 3.03E-01 | 1.00E+00 | -0.52 | 6.44E-01 | 9.47E-01 |
| <b>TCAP</b>       | -1.13 | 3.44E-01 | 1.00E+00 | 0.41  | 6.44E-01 | 9.47E-01 |
| <b>LINGO1</b>     | -0.32 | 5.74E-01 | 1.00E+00 | 0.38  | 6.44E-01 | 9.47E-01 |
| <b>EIF4A1P2</b>   | 0.70  | 7.54E-01 | 1.00E+00 | 0.34  | 6.44E-01 | 9.47E-01 |
| <b>TRAPPC9</b>    | -0.18 | 5.27E-01 | 1.00E+00 | 0.20  | 6.44E-01 | 9.47E-01 |
| <b>ZNF407</b>     | -0.43 | 4.16E-02 | 1.00E+00 | 0.17  | 6.44E-01 | 9.47E-01 |

|                   |       |          |          |       |          |          |
|-------------------|-------|----------|----------|-------|----------|----------|
| <b>FER</b>        | -0.10 | 5.39E-01 | 1.00E+00 | -0.10 | 6.44E-01 | 9.47E-01 |
| <b>SARS2</b>      | -1.00 | 5.22E-01 | 1.00E+00 | -0.23 | 6.44E-01 | 9.47E-01 |
| <b>G16268</b>     | -0.14 | 8.23E-01 | 1.00E+00 | -0.39 | 6.44E-01 | 9.47E-01 |
| <b>AC064799.2</b> | -1.24 | 7.19E-01 | 1.00E+00 | 0.54  | 6.45E-01 | 9.47E-01 |
| <b>APBA3</b>      | -0.17 | 6.48E-01 | 1.00E+00 | -0.18 | 6.45E-01 | 9.47E-01 |
| <b>CD55</b>       | 0.39  | 2.02E-01 | 1.00E+00 | -0.13 | 6.45E-01 | 9.47E-01 |
| <b>RPL41P1</b>    | -0.04 | 8.69E-01 | 1.00E+00 | 0.23  | 6.45E-01 | 9.47E-01 |
| <b>FBXO16</b>     | 0.44  | 6.75E-01 | 1.00E+00 | 0.35  | 6.45E-01 | 9.47E-01 |
| <b>WDR48</b>      | 0.24  | 2.00E-01 | 1.00E+00 | -0.06 | 6.45E-01 | 9.47E-01 |
| <b>C1orf210</b>   | -0.13 | 7.81E-01 | 1.00E+00 | -0.27 | 6.45E-01 | 9.47E-01 |
| <b>MED4</b>       | 0.08  | 6.89E-01 | 1.00E+00 | -0.18 | 6.45E-01 | 9.47E-01 |
| <b>HKDC1</b>      | -1.37 | 2.17E-01 | 1.00E+00 | 0.65  | 6.45E-01 | 9.47E-01 |
| <b>ARMCX6</b>     | 0.18  | 4.29E-01 | 1.00E+00 | -0.10 | 6.45E-01 | 9.47E-01 |
| <b>SENP1</b>      | 0.06  | 7.76E-01 | 1.00E+00 | -0.22 | 6.45E-01 | 9.47E-01 |
| <b>AC093512.2</b> | 0.50  | 5.19E-01 | 1.00E+00 | -0.28 | 6.45E-01 | 9.47E-01 |
| <b>PRRG1</b>      | -0.10 | 7.77E-01 | 1.00E+00 | 0.18  | 6.45E-01 | 9.47E-01 |
| <b>DOCK7</b>      | 0.21  | 3.85E-01 | 1.00E+00 | -0.13 | 6.45E-01 | 9.47E-01 |
| <b>AC055839.1</b> | -2.65 | 1.82E-01 | 1.00E+00 | 0.58  | 6.45E-01 | 9.47E-01 |
| <b>FITM1</b>      | 0.79  | 2.39E-01 | 1.00E+00 | -0.31 | 6.45E-01 | 9.47E-01 |
| <b>TSPYL2</b>     | -0.16 | 4.63E-01 | 1.00E+00 | 0.10  | 6.45E-01 | 9.47E-01 |
| <b>EBLN2</b>      | 1.39  | 1.59E-01 | 1.00E+00 | -0.50 | 6.45E-01 | 9.47E-01 |
| <b>G3030</b>      | -1.64 | 2.94E-01 | 1.00E+00 | 0.50  | 6.45E-01 | 9.47E-01 |
| <b>KLHDC8A</b>    | 0.20  | 7.95E-01 | 1.00E+00 | 0.44  | 6.45E-01 | 9.47E-01 |
| <b>AC005070.3</b> | 1.47  | 7.43E-02 | 1.00E+00 | -0.29 | 6.45E-01 | 9.47E-01 |
| <b>AC073046.1</b> | -0.66 | 1.84E-01 | 1.00E+00 | -0.47 | 6.45E-01 | 9.47E-01 |
| <b>OSTM1</b>      | 0.25  | 4.54E-01 | 1.00E+00 | -0.13 | 6.45E-01 | 9.47E-01 |
| <b>CLTC</b>       | 0.09  | 6.25E-01 | 1.00E+00 | 0.10  | 6.45E-01 | 9.47E-01 |
| <b>SYF2</b>       | 0.08  | 6.28E-01 | 1.00E+00 | -0.13 | 6.45E-01 | 9.47E-01 |
| <b>AC068189.1</b> | 0.12  | 9.39E-01 | 1.00E+00 | 0.44  | 6.45E-01 | 9.47E-01 |
| <b>FAM171B</b>    | -0.45 | 1.70E-01 | 1.00E+00 | 0.20  | 6.45E-01 | 9.47E-01 |
| <b>AC090114.2</b> | -0.75 | 4.01E-02 | 1.00E+00 | 0.27  | 6.45E-01 | 9.47E-01 |
| <b>CALCRL</b>     | 0.28  | 5.43E-01 | 1.00E+00 | -0.18 | 6.45E-01 | 9.47E-01 |

|             |       |          |          |       |          |          |
|-------------|-------|----------|----------|-------|----------|----------|
| LINC01006   | -0.33 | 6.01E-01 | 1.00E+00 | -0.23 | 6.46E-01 | 9.47E-01 |
| XLOC_001447 | -0.87 | 5.65E-01 | 1.00E+00 | 0.35  | 6.46E-01 | 9.47E-01 |
| LINC01160   | -0.82 | 5.80E-01 | 1.00E+00 | 0.44  | 6.46E-01 | 9.47E-01 |
| C16orf91    | -0.10 | 6.49E-01 | 1.00E+00 | -0.13 | 6.46E-01 | 9.47E-01 |
| AC138207.2  | -0.69 | 6.50E-01 | 1.00E+00 | 0.39  | 6.46E-01 | 9.47E-01 |
| IMPDH1P5    | -1.14 | 2.66E-01 | 1.00E+00 | 0.58  | 6.46E-01 | 9.47E-01 |
| PYGL        | 0.38  | 3.54E-01 | 1.00E+00 | -0.17 | 6.46E-01 | 9.47E-01 |
| PAPSS1      | 0.17  | 3.70E-01 | 1.00E+00 | 0.06  | 6.46E-01 | 9.47E-01 |
| AC055822.1  | -2.39 | 1.04E-01 | 1.00E+00 | -0.43 | 6.46E-01 | 9.47E-01 |
| GCNT2       | 0.41  | 3.43E-01 | 1.00E+00 | -0.21 | 6.46E-01 | 9.47E-01 |
| AC121247.1  | -0.79 | 4.70E-01 | 1.00E+00 | 0.48  | 6.46E-01 | 9.47E-01 |
| PLAC9P1     | 0.17  | 8.98E-01 | 1.00E+00 | 0.76  | 6.46E-01 | 9.47E-01 |
| CHRNA6      | 1.34  | 6.98E-01 | 1.00E+00 | 0.74  | 6.46E-01 | 9.47E-01 |
| FSD2        | -2.94 | 1.98E-01 | 1.00E+00 | 0.46  | 6.46E-01 | 9.47E-01 |
| RPL13P12    | -1.05 | 7.42E-01 | 1.00E+00 | 0.31  | 6.46E-01 | 9.47E-01 |
| AC147067.1  | -0.20 | 6.74E-01 | 1.00E+00 | 0.19  | 6.46E-01 | 9.47E-01 |
| AL138976.2  | 0.11  | 8.35E-01 | 1.00E+00 | 0.30  | 6.46E-01 | 9.47E-01 |
| AL591479.1  | 0.13  | 7.11E-01 | 1.00E+00 | 0.29  | 6.46E-01 | 9.47E-01 |
| LEO1        | -0.07 | 8.29E-01 | 1.00E+00 | -0.15 | 6.46E-01 | 9.47E-01 |
| XLOC_013420 | 0.38  | 3.91E-01 | 1.00E+00 | -0.20 | 6.46E-01 | 9.47E-01 |
| RWDD4P1     | -1.07 | 6.52E-01 | 1.00E+00 | -0.25 | 6.46E-01 | 9.47E-01 |
| ZFP42       | 4.06  | 7.92E-03 | 5.47E-01 | 1.47  | 6.46E-01 | 9.47E-01 |
| PIGZ        | -0.15 | 6.55E-01 | 1.00E+00 | -0.26 | 6.46E-01 | 9.47E-01 |
| AL592114.1  | 0.00  | 9.99E-01 | 1.00E+00 | -0.35 | 6.46E-01 | 9.47E-01 |
| RPS19       | -0.25 | 3.76E-01 | 1.00E+00 | 0.17  | 6.46E-01 | 9.47E-01 |
| LSM11       | 0.51  | 1.04E-01 | 1.00E+00 | 0.28  | 6.46E-01 | 9.47E-01 |
| HAPLN1      | 0.41  | 7.34E-01 | 1.00E+00 | 0.44  | 6.46E-01 | 9.47E-01 |
| TBC1D10C    | 0.03  | 9.62E-01 | 1.00E+00 | 1.19  | 6.46E-01 | 9.47E-01 |
| HAUS5       | -0.46 | 7.16E-02 | 1.00E+00 | 0.09  | 6.47E-01 | 9.47E-01 |
| G36779      | 0.32  | 6.49E-01 | 1.00E+00 | 0.24  | 6.47E-01 | 9.47E-01 |
| AC073648.3  | -0.51 | 8.17E-01 | 1.00E+00 | -0.64 | 6.47E-01 | 9.47E-01 |
| RPL17       | 0.04  | 9.48E-01 | 1.00E+00 | 0.29  | 6.47E-01 | 9.47E-01 |



|                 |       |          |          |       |          |          |
|-----------------|-------|----------|----------|-------|----------|----------|
| STUB1           | -0.01 | 9.75E-01 | 1.00E+00 | -0.28 | 6.47E-01 | 9.47E-01 |
| SPCS3           | 0.08  | 7.56E-01 | 1.00E+00 | 0.11  | 6.47E-01 | 9.47E-01 |
| ADH5            | 0.30  | 3.43E-01 | 1.00E+00 | -0.14 | 6.47E-01 | 9.47E-01 |
| XLOC_000610     | -0.08 | 8.46E-01 | 1.00E+00 | -0.26 | 6.47E-01 | 9.47E-01 |
| NFKB1           | -0.05 | 7.86E-01 | 1.00E+00 | -0.20 | 6.47E-01 | 9.47E-01 |
| AGGF1           | -0.07 | 7.63E-01 | 1.00E+00 | -0.11 | 6.47E-01 | 9.47E-01 |
| SUGT1P4-STRA6LP | -0.41 | 7.78E-01 | 1.00E+00 | 0.59  | 6.47E-01 | 9.47E-01 |
| AC114489.1      | -0.58 | 8.67E-01 | 1.00E+00 | -0.60 | 6.47E-01 | 9.47E-01 |
| DXO             | 0.10  | 7.48E-01 | 1.00E+00 | -0.12 | 6.47E-01 | 9.47E-01 |
| LAMTOR2         | -0.03 | 8.81E-01 | 1.00E+00 | -0.13 | 6.47E-01 | 9.47E-01 |
| AL358472.4      | -0.70 | 3.94E-01 | 1.00E+00 | -0.18 | 6.47E-01 | 9.47E-01 |
| UBASH3A         | -1.06 | 4.52E-01 | 1.00E+00 | 1.45  | 6.47E-01 | 9.47E-01 |
| DCLK2           | -0.25 | 6.06E-01 | 1.00E+00 | 0.37  | 6.47E-01 | 9.47E-01 |
| CH25H           | -0.72 | 3.26E-01 | 1.00E+00 | 0.32  | 6.47E-01 | 9.47E-01 |
| AVPR2           | 0.29  | 6.30E-01 | 1.00E+00 | -0.31 | 6.47E-01 | 9.47E-01 |
| HMGA1P5         | -3.79 | 2.45E-01 | 1.00E+00 | -0.68 | 6.47E-01 | 9.47E-01 |
| MTMR1           | 0.07  | 8.22E-01 | 1.00E+00 | -0.19 | 6.47E-01 | 9.47E-01 |
| TSPAN15         | 0.77  | 1.72E-01 | 1.00E+00 | -0.28 | 6.47E-01 | 9.47E-01 |
| FAM120B         | -0.12 | 5.04E-01 | 1.00E+00 | -0.08 | 6.47E-01 | 9.47E-01 |
| MID1            | -0.06 | 8.33E-01 | 1.00E+00 | 0.13  | 6.47E-01 | 9.47E-01 |
| NABP1           | -0.07 | 8.66E-01 | 1.00E+00 | -0.26 | 6.48E-01 | 9.47E-01 |
| MRPS21          | 0.11  | 5.48E-01 | 1.00E+00 | 0.10  | 6.48E-01 | 9.47E-01 |
| SLC30A4         | 0.03  | 9.37E-01 | 1.00E+00 | -0.16 | 6.48E-01 | 9.47E-01 |
| TTL             | -0.10 | 5.70E-01 | 1.00E+00 | -0.18 | 6.48E-01 | 9.47E-01 |
| AC009533.1      | -0.96 | 8.17E-02 | 1.00E+00 | 0.32  | 6.48E-01 | 9.47E-01 |
| TGM3            | 0.10  | 8.55E-01 | 1.00E+00 | -0.29 | 6.48E-01 | 9.47E-01 |
| RPL21P11        | 0.01  | 9.94E-01 | 1.00E+00 | -0.36 | 6.48E-01 | 9.47E-01 |
| GNRH1           | 1.49  | 4.03E-01 | 1.00E+00 | 0.63  | 6.48E-01 | 9.47E-01 |
| STX18-AS1       | -0.15 | 7.97E-01 | 1.00E+00 | 0.24  | 6.48E-01 | 9.47E-01 |
| AL355877.1      | 1.49  | 2.43E-01 | 1.00E+00 | 0.48  | 6.48E-01 | 9.47E-01 |
| PCDH10          | -1.78 | 3.10E-03 | 2.91E-01 | -0.63 | 6.48E-01 | 9.47E-01 |
| DUSP3           | 0.18  | 4.44E-01 | 1.00E+00 | 0.12  | 6.48E-01 | 9.47E-01 |

|                      |       |          |          |       |          |          |
|----------------------|-------|----------|----------|-------|----------|----------|
| <b>G34192</b>        | -0.78 | 2.25E-01 | 1.00E+00 | -0.41 | 6.48E-01 | 9.47E-01 |
| <b>AZIN1</b>         | 0.26  | 2.51E-01 | 1.00E+00 | -0.13 | 6.48E-01 | 9.47E-01 |
| <b>THAP8</b>         | 0.15  | 6.09E-01 | 1.00E+00 | 0.12  | 6.49E-01 | 9.47E-01 |
| <b>AC011487.1</b>    | 0.11  | 9.73E-01 | 1.00E+00 | 0.54  | 6.49E-01 | 9.47E-01 |
| <b>IL36A</b>         | -1.68 | 6.27E-01 | 1.00E+00 | 1.46  | 6.49E-01 | 9.47E-01 |
| <b>MREG</b>          | -0.07 | 8.56E-01 | 1.00E+00 | 0.22  | 6.49E-01 | 9.47E-01 |
| <b>FANCI</b>         | -0.04 | 8.86E-01 | 1.00E+00 | 0.12  | 6.49E-01 | 9.47E-01 |
| <b>FCHO1</b>         | -0.41 | 4.47E-01 | 1.00E+00 | 0.18  | 6.49E-01 | 9.47E-01 |
| <b>RAB11FIP1</b>     | -0.14 | 7.78E-01 | 1.00E+00 | -0.16 | 6.49E-01 | 9.47E-01 |
| <b>XLOC_003234</b>   | 0.63  | 6.60E-01 | 1.00E+00 | -0.48 | 6.49E-01 | 9.47E-01 |
| <b>N4BP2</b>         | -0.43 | 2.03E-01 | 1.00E+00 | -0.17 | 6.49E-01 | 9.47E-01 |
| <b>SPDYE18</b>       | 0.26  | 7.20E-01 | 1.00E+00 | -0.29 | 6.49E-01 | 9.47E-01 |
| <b>XLOC_008975</b>   | -2.48 | 2.55E-01 | 1.00E+00 | -0.53 | 6.49E-01 | 9.47E-01 |
| <b>CRNKL1</b>        | 0.09  | 6.81E-01 | 1.00E+00 | -0.07 | 6.49E-01 | 9.47E-01 |
| <b>RNU5B-1</b>       | -1.52 | 6.60E-01 | 1.00E+00 | -0.56 | 6.49E-01 | 9.47E-01 |
| <b>PAXBP1</b>        | -0.02 | 9.48E-01 | 1.00E+00 | -0.21 | 6.49E-01 | 9.47E-01 |
| <b>FOXJ1</b>         | 0.07  | 9.02E-01 | 1.00E+00 | 0.34  | 6.49E-01 | 9.47E-01 |
| <b>RP11-187C18.4</b> | 0.41  | 6.23E-01 | 1.00E+00 | 0.31  | 6.49E-01 | 9.47E-01 |
| <b>NSD2</b>          | -0.19 | 3.38E-01 | 1.00E+00 | 0.21  | 6.49E-01 | 9.47E-01 |
| <b>AC018647.1</b>    | -0.74 | 3.19E-01 | 1.00E+00 | -0.32 | 6.49E-01 | 9.47E-01 |
| <b>B4GALT4-AS1</b>   | -1.68 | 6.27E-01 | 1.00E+00 | -0.73 | 6.49E-01 | 9.47E-01 |
| <b>AC127496.5</b>    | -1.16 | 5.83E-01 | 1.00E+00 | -0.63 | 6.49E-01 | 9.47E-01 |
| <b>BAG2</b>          | 0.22  | 6.76E-01 | 1.00E+00 | -0.20 | 6.49E-01 | 9.47E-01 |
| <b>AC100849.1</b>    | -3.41 | 3.11E-01 | 1.00E+00 | 0.51  | 6.49E-01 | 9.47E-01 |
| <b>LINC02193</b>     | -0.26 | 8.19E-01 | 1.00E+00 | 0.33  | 6.49E-01 | 9.47E-01 |
| <b>FAM228B</b>       | -0.48 | 3.85E-01 | 1.00E+00 | -0.17 | 6.49E-01 | 9.47E-01 |
| <b>AC010487.1</b>    | 0.54  | 3.35E-01 | 1.00E+00 | 0.47  | 6.49E-01 | 9.47E-01 |
| <b>BABAM1</b>        | -0.01 | 9.76E-01 | 1.00E+00 | -0.18 | 6.49E-01 | 9.47E-01 |
| <b>ZNF182</b>        | 0.12  | 7.21E-01 | 1.00E+00 | -0.28 | 6.49E-01 | 9.47E-01 |
| <b>FOXN1</b>         | -0.28 | 5.94E-01 | 1.00E+00 | 0.32  | 6.49E-01 | 9.47E-01 |
| <b>ZSCAN31</b>       | 0.16  | 6.63E-01 | 1.00E+00 | -0.18 | 6.49E-01 | 9.47E-01 |
| <b>CXCL5</b>         | -0.97 | 7.31E-01 | 1.00E+00 | 1.44  | 6.49E-01 | 9.47E-01 |

|                    |       |          |          |       |          |          |
|--------------------|-------|----------|----------|-------|----------|----------|
| <b>Z74021.1</b>    | 0.15  | 9.22E-01 | 1.00E+00 | 0.38  | 6.49E-01 | 9.47E-01 |
| <b>KATNBL1</b>     | 0.18  | 4.81E-01 | 1.00E+00 | -0.15 | 6.50E-01 | 9.47E-01 |
| <b>ATP6V0B</b>     | -0.03 | 8.89E-01 | 1.00E+00 | 0.13  | 6.50E-01 | 9.47E-01 |
| <b>FAM129A</b>     | 0.12  | 7.65E-01 | 1.00E+00 | 0.19  | 6.50E-01 | 9.47E-01 |
| <b>NCL</b>         | -0.27 | 1.50E-01 | 1.00E+00 | 0.12  | 6.50E-01 | 9.47E-01 |
| <b>LINC01563</b>   | -1.63 | 2.89E-01 | 1.00E+00 | -0.47 | 6.50E-01 | 9.47E-01 |
| <b>C17orf58</b>    | 0.16  | 6.30E-01 | 1.00E+00 | -0.14 | 6.50E-01 | 9.47E-01 |
| <b>AXIN2</b>       | 0.37  | 2.29E-01 | 1.00E+00 | 0.19  | 6.50E-01 | 9.47E-01 |
| <b>NKILA</b>       | -0.17 | 8.55E-01 | 1.00E+00 | -0.37 | 6.50E-01 | 9.47E-01 |
| <b>HSP90AB1</b>    | -0.10 | 5.32E-01 | 1.00E+00 | 0.08  | 6.50E-01 | 9.47E-01 |
| <b>FLVCR1</b>      | 0.04  | 9.17E-01 | 1.00E+00 | -0.17 | 6.50E-01 | 9.47E-01 |
| <b>XLOC_006144</b> | -0.75 | 3.30E-01 | 1.00E+00 | -0.30 | 6.50E-01 | 9.47E-01 |
| <b>AC019257.1</b>  | 0.34  | 8.08E-01 | 1.00E+00 | -0.57 | 6.50E-01 | 9.47E-01 |
| <b>RPL13P5</b>     | -0.61 | 4.46E-01 | 1.00E+00 | 0.21  | 6.50E-01 | 9.48E-01 |
| <b>IL6</b>         | -6.66 | 3.39E-03 | 3.11E-01 | 1.42  | 6.50E-01 | 9.48E-01 |
| <b>ING3</b>        | -0.08 | 7.31E-01 | 1.00E+00 | -0.15 | 6.50E-01 | 9.48E-01 |
| <b>AC104066.1</b>  | 0.08  | 9.48E-01 | 1.00E+00 | -0.39 | 6.51E-01 | 9.48E-01 |
| <b>MAP4</b>        | -0.15 | 5.03E-01 | 1.00E+00 | 0.16  | 6.51E-01 | 9.48E-01 |
| <b>SCG2</b>        | -0.22 | 8.67E-01 | 1.00E+00 | 0.60  | 6.51E-01 | 9.48E-01 |
| <b>AP003774.4</b>  | 0.16  | 9.63E-01 | 1.00E+00 | 0.58  | 6.51E-01 | 9.48E-01 |
| <b>PDCD6IPP2</b>   | 0.38  | 6.92E-01 | 1.00E+00 | -0.31 | 6.51E-01 | 9.48E-01 |
| <b>SELENOTP1</b>   | 1.52  | 6.43E-01 | 1.00E+00 | -0.32 | 6.51E-01 | 9.48E-01 |
| <b>RNF34</b>       | 0.20  | 3.88E-01 | 1.00E+00 | -0.12 | 6.51E-01 | 9.48E-01 |
| <b>HMGB3P6</b>     | NA    | NA       | NA       | 0.58  | 6.51E-01 | 9.48E-01 |
| <b>SRGAP2</b>      | 0.15  | 6.71E-01 | 1.00E+00 | 0.14  | 6.51E-01 | 9.48E-01 |
| <b>TRAV1-1</b>     | 1.06  | 7.54E-01 | 1.00E+00 | 0.83  | 6.51E-01 | 9.48E-01 |
| <b>TRPC1</b>       | 0.41  | 2.43E-01 | 1.00E+00 | -0.26 | 6.51E-01 | 9.48E-01 |
| <b>FADS6</b>       | -0.06 | 9.17E-01 | 1.00E+00 | -0.31 | 6.51E-01 | 9.48E-01 |
| <b>AC097468.3</b>  | -0.38 | 6.51E-01 | 1.00E+00 | 0.33  | 6.51E-01 | 9.48E-01 |
| <b>EPM2AIP1</b>    | -0.27 | 1.67E-01 | 1.00E+00 | -0.08 | 6.51E-01 | 9.48E-01 |
| <b>EIF3I</b>       | -0.13 | 4.65E-01 | 1.00E+00 | 0.05  | 6.51E-01 | 9.48E-01 |
| <b>CHRM3-AS2</b>   | -1.10 | 7.53E-01 | 1.00E+00 | 0.57  | 6.51E-01 | 9.48E-01 |

|                    |       |          |          |       |          |          |
|--------------------|-------|----------|----------|-------|----------|----------|
| <b>HSD17B6</b>     | 0.40  | 8.03E-01 | 1.00E+00 | -0.34 | 6.51E-01 | 9.48E-01 |
| <b>AC127502.1</b>  | 0.08  | 8.91E-01 | 1.00E+00 | -0.26 | 6.51E-01 | 9.48E-01 |
| <b>SRD5A1</b>      | 0.11  | 6.91E-01 | 1.00E+00 | -0.15 | 6.51E-01 | 9.48E-01 |
| <b>AL596330.1</b>  | -0.85 | 5.97E-01 | 1.00E+00 | 0.63  | 6.51E-01 | 9.48E-01 |
| <b>UPK1A</b>       | 2.10  | 3.53E-02 | 1.00E+00 | 0.44  | 6.51E-01 | 9.48E-01 |
| <b>AC055811.4</b>  | 0.03  | 9.85E-01 | 1.00E+00 | 0.63  | 6.51E-01 | 9.48E-01 |
| <b>KIR3DX1</b>     | -0.16 | 9.62E-01 | 1.00E+00 | 0.70  | 6.51E-01 | 9.48E-01 |
| <b>AC007495.1</b>  | -1.08 | 1.64E-01 | 1.00E+00 | -0.53 | 6.51E-01 | 9.48E-01 |
| <b>SNRPD2</b>      | -0.17 | 4.17E-01 | 1.00E+00 | 0.12  | 6.51E-01 | 9.48E-01 |
| <b>CFAP99</b>      | -3.71 | 4.92E-02 | 1.00E+00 | 0.66  | 6.51E-01 | 9.48E-01 |
| <b>BPIFC</b>       | 0.12  | 8.12E-01 | 1.00E+00 | 0.36  | 6.51E-01 | 9.48E-01 |
| <b>G9978</b>       | -0.28 | 6.76E-01 | 1.00E+00 | 0.33  | 6.51E-01 | 9.48E-01 |
| <b>AC244517.3</b>  | -0.67 | 8.48E-01 | 1.00E+00 | 0.84  | 6.51E-01 | 9.48E-01 |
| <b>TARBP1</b>      | 0.25  | 3.92E-01 | 1.00E+00 | 0.23  | 6.52E-01 | 9.48E-01 |
| <b>XLOC_013703</b> | 1.17  | 3.59E-01 | 1.00E+00 | -0.41 | 6.52E-01 | 9.48E-01 |
| <b>TLE6</b>        | -0.74 | 4.40E-01 | 1.00E+00 | 0.37  | 6.52E-01 | 9.48E-01 |
| <b>PDZK1IP1</b>    | 0.15  | 7.44E-01 | 1.00E+00 | 0.25  | 6.52E-01 | 9.48E-01 |
| <b>FLNA</b>        | -0.46 | 2.37E-01 | 1.00E+00 | 0.29  | 6.52E-01 | 9.48E-01 |
| <b>PHLDB2</b>      | 0.25  | 6.15E-01 | 1.00E+00 | 0.18  | 6.52E-01 | 9.48E-01 |
| <b>AL445187.1</b>  | 1.45  | 4.52E-01 | 1.00E+00 | -0.60 | 6.52E-01 | 9.48E-01 |
| <b>SLC13A3</b>     | -0.14 | 6.60E-01 | 1.00E+00 | -0.27 | 6.52E-01 | 9.48E-01 |
| <b>AC079336.5</b>  | 0.04  | 9.80E-01 | 1.00E+00 | -0.58 | 6.52E-01 | 9.48E-01 |
| <b>XLOC_010023</b> | -1.48 | 3.00E-01 | 1.00E+00 | -0.35 | 6.52E-01 | 9.48E-01 |
| <b>PFDN5</b>       | -0.05 | 8.42E-01 | 1.00E+00 | 0.14  | 6.52E-01 | 9.48E-01 |
| <b>CCNJ</b>        | -0.32 | 5.26E-01 | 1.00E+00 | 0.18  | 6.52E-01 | 9.48E-01 |
| <b>PCDHB11</b>     | 0.67  | 2.56E-01 | 1.00E+00 | 0.20  | 6.52E-01 | 9.48E-01 |
| <b>ANKRD13A</b>    | -0.14 | 6.05E-01 | 1.00E+00 | -0.16 | 6.52E-01 | 9.48E-01 |
| <b>NINJ1</b>       | -0.61 | 3.89E-02 | 1.00E+00 | -0.11 | 6.52E-01 | 9.48E-01 |
| <b>KLC3</b>        | -0.51 | 2.28E-01 | 1.00E+00 | -0.30 | 6.52E-01 | 9.48E-01 |
| <b>MFSD13B</b>     | 0.03  | 9.82E-01 | 1.00E+00 | -0.32 | 6.52E-01 | 9.48E-01 |
| <b>UBXN10-AS1</b>  | 0.63  | 5.10E-01 | 1.00E+00 | 0.50  | 6.52E-01 | 9.48E-01 |
| <b>AC084783.1</b>  | 0.97  | 7.33E-01 | 1.00E+00 | -0.53 | 6.52E-01 | 9.48E-01 |

|                    |       |          |          |       |          |          |
|--------------------|-------|----------|----------|-------|----------|----------|
| <b>CHMP3</b>       | 0.15  | 3.33E-01 | 1.00E+00 | -0.09 | 6.52E-01 | 9.48E-01 |
| <b>XLOC_013434</b> | 0.24  | 8.48E-01 | 1.00E+00 | 0.62  | 6.52E-01 | 9.48E-01 |
| <b>SFTPD</b>       | -0.04 | 9.24E-01 | 1.00E+00 | 0.23  | 6.53E-01 | 9.48E-01 |
| <b>ZNF595</b>      | 0.41  | 3.98E-01 | 1.00E+00 | 0.21  | 6.53E-01 | 9.48E-01 |
| <b>AC114956.3</b>  | 2.40  | 2.69E-03 | 2.68E-01 | -0.26 | 6.53E-01 | 9.48E-01 |
| <b>CXCL9</b>       | -4.11 | 9.12E-07 | 3.41E-04 | 1.41  | 6.53E-01 | 9.48E-01 |
| <b>AP006621.5</b>  | -1.71 | 8.31E-02 | 1.00E+00 | -0.53 | 6.53E-01 | 9.48E-01 |
| <b>PTS</b>         | 0.20  | 5.03E-01 | 1.00E+00 | -0.16 | 6.53E-01 | 9.48E-01 |
| <b>HSPB1P2</b>     | -1.33 | 6.98E-01 | 1.00E+00 | -0.36 | 6.53E-01 | 9.48E-01 |
| <b>ZNF398</b>      | -0.18 | 3.84E-01 | 1.00E+00 | -0.16 | 6.53E-01 | 9.48E-01 |
| <b>CDADC1</b>      | 0.23  | 4.01E-01 | 1.00E+00 | -0.13 | 6.53E-01 | 9.48E-01 |
| <b>AC114728.1</b>  | 0.80  | 8.17E-01 | 1.00E+00 | -0.36 | 6.53E-01 | 9.48E-01 |
| <b>MLIP-IT1</b>    | 0.32  | 8.41E-01 | 1.00E+00 | -0.26 | 6.53E-01 | 9.48E-01 |
| <b>ZNF486</b>      | 0.35  | 3.49E-01 | 1.00E+00 | 0.16  | 6.53E-01 | 9.48E-01 |
| <b>NRCAM</b>       | 0.09  | 8.69E-01 | 1.00E+00 | 0.27  | 6.53E-01 | 9.48E-01 |
| <b>GPC1</b>        | -0.35 | 3.04E-01 | 1.00E+00 | -0.25 | 6.53E-01 | 9.48E-01 |
| <b>DTX2</b>        | -0.17 | 6.75E-01 | 1.00E+00 | 0.17  | 6.53E-01 | 9.48E-01 |
| <b>CCNE2</b>       | -0.27 | 6.64E-01 | 1.00E+00 | -0.24 | 6.53E-01 | 9.48E-01 |
| <b>MED12L</b>      | -0.54 | 6.07E-01 | 1.00E+00 | -0.28 | 6.53E-01 | 9.48E-01 |
| <b>ANKRD30B</b>    | -0.98 | 7.31E-01 | 1.00E+00 | -1.06 | 6.53E-01 | 9.48E-01 |
| <b>PEX13</b>       | -0.25 | 3.33E-01 | 1.00E+00 | -0.13 | 6.53E-01 | 9.48E-01 |
| <b>UBAP1</b>       | 0.02  | 8.98E-01 | 1.00E+00 | 0.07  | 6.53E-01 | 9.48E-01 |
| <b>DTX1</b>        | 0.87  | 1.54E-01 | 1.00E+00 | 0.35  | 6.53E-01 | 9.48E-01 |
| <b>MYRF</b>        | -1.50 | 4.62E-04 | 9.31E-02 | -0.44 | 6.53E-01 | 9.48E-01 |
| <b>CYP51A1P3</b>   | 0.69  | 6.14E-01 | 1.00E+00 | -0.46 | 6.53E-01 | 9.48E-01 |
| <b>FAM160A1</b>    | -0.20 | 5.49E-01 | 1.00E+00 | 0.27  | 6.53E-01 | 9.48E-01 |
| <b>TET2-AS1</b>    | NA    | NA       | NA       | 0.47  | 6.53E-01 | 9.48E-01 |
| <b>SYT3</b>        | -2.55 | 3.01E-02 | 9.97E-01 | 0.60  | 6.53E-01 | 9.48E-01 |
| <b>LINC00641</b>   | -0.97 | 1.61E-01 | 1.00E+00 | -0.34 | 6.54E-01 | 9.48E-01 |
| <b>G42780</b>      | 0.41  | 8.81E-01 | 1.00E+00 | 0.42  | 6.54E-01 | 9.48E-01 |
| <b>SORBS2</b>      | -0.02 | 9.71E-01 | 1.00E+00 | -0.19 | 6.54E-01 | 9.48E-01 |
| <b>ACOT1</b>       | 0.78  | 3.02E-01 | 1.00E+00 | -0.32 | 6.54E-01 | 9.48E-01 |

|                   |       |          |          |       |          |          |
|-------------------|-------|----------|----------|-------|----------|----------|
| <b>MTCP1</b>      | 0.06  | 9.62E-01 | 1.00E+00 | -0.36 | 6.54E-01 | 9.48E-01 |
| <b>LMO1</b>       | -0.99 | 8.65E-03 | 5.74E-01 | -0.28 | 6.54E-01 | 9.48E-01 |
| <b>LCE1C</b>      | 0.45  | 5.02E-01 | 1.00E+00 | 1.40  | 6.54E-01 | 9.48E-01 |
| <b>RAMP1</b>      | -0.56 | 1.37E-01 | 1.00E+00 | 0.14  | 6.54E-01 | 9.48E-01 |
| <b>RPS26</b>      | 0.50  | 2.79E-02 | 9.73E-01 | 0.11  | 6.54E-01 | 9.48E-01 |
| <b>AC018695.1</b> | NA    | NA       | NA       | 0.49  | 6.54E-01 | 9.48E-01 |
| <b>MAZ</b>        | -0.47 | 1.38E-01 | 1.00E+00 | 0.20  | 6.54E-01 | 9.48E-01 |
| <b>AC012065.3</b> | -0.27 | 9.34E-01 | 1.00E+00 | -0.72 | 6.54E-01 | 9.48E-01 |
| <b>MROH1</b>      | -0.26 | 4.25E-01 | 1.00E+00 | 0.28  | 6.54E-01 | 9.48E-01 |
| <b>G39254</b>     | -0.69 | 4.39E-01 | 1.00E+00 | 0.63  | 6.54E-01 | 9.48E-01 |
| <b>PPP1CC</b>     | 0.13  | 4.74E-01 | 1.00E+00 | -0.14 | 6.54E-01 | 9.48E-01 |
| <b>SLF1</b>       | 0.43  | 2.43E-01 | 1.00E+00 | -0.14 | 6.54E-01 | 9.48E-01 |
| <b>KRTAP13-1</b>  | -1.16 | 6.65E-01 | 1.00E+00 | 1.42  | 6.54E-01 | 9.48E-01 |
| <b>STK31</b>      | 0.78  | 6.01E-01 | 1.00E+00 | 0.56  | 6.54E-01 | 9.48E-01 |
| <b>MYBPC2</b>     | -1.63 | 6.24E-02 | 1.00E+00 | 0.67  | 6.54E-01 | 9.48E-01 |
| <b>KCNB2</b>      | 1.01  | 5.80E-01 | 1.00E+00 | 0.56  | 6.54E-01 | 9.48E-01 |
| <b>IGSF21</b>     | -1.07 | 7.04E-02 | 1.00E+00 | 0.48  | 6.54E-01 | 9.48E-01 |
| <b>AC017083.1</b> | 2.60  | 3.47E-01 | 1.00E+00 | 0.49  | 6.54E-01 | 9.48E-01 |
| <b>NAP1L2</b>     | -0.13 | 6.52E-01 | 1.00E+00 | 0.24  | 6.54E-01 | 9.48E-01 |
| <b>LIG1</b>       | -0.51 | 1.20E-01 | 1.00E+00 | 0.15  | 6.54E-01 | 9.48E-01 |
| <b>CCDC188</b>    | -0.41 | 6.93E-01 | 1.00E+00 | 0.66  | 6.54E-01 | 9.48E-01 |
| <b>C2orf40</b>    | 0.46  | 3.94E-01 | 1.00E+00 | -0.22 | 6.54E-01 | 9.48E-01 |
| <b>AL356489.2</b> | 0.72  | 3.27E-01 | 1.00E+00 | 0.49  | 6.54E-01 | 9.48E-01 |
| <b>LRRC2</b>      | 0.64  | 2.32E-01 | 1.00E+00 | 0.25  | 6.54E-01 | 9.48E-01 |
| <b>GCDH</b>       | 0.01  | 9.83E-01 | 1.00E+00 | 0.07  | 6.55E-01 | 9.48E-01 |
| <b>TMPPE</b>      | -0.19 | 6.06E-01 | 1.00E+00 | 0.27  | 6.55E-01 | 9.48E-01 |
| <b>AC106791.1</b> | 3.45  | 1.53E-01 | 1.00E+00 | -0.41 | 6.55E-01 | 9.48E-01 |
| <b>AL022157.1</b> | 1.32  | 3.43E-01 | 1.00E+00 | 0.54  | 6.55E-01 | 9.48E-01 |
| <b>AL157938.2</b> | -1.87 | 5.55E-01 | 1.00E+00 | -0.50 | 6.55E-01 | 9.48E-01 |
| <b>AC024060.1</b> | 0.81  | 5.05E-01 | 1.00E+00 | -0.28 | 6.55E-01 | 9.48E-01 |
| <b>UBC</b>        | -0.31 | 1.83E-01 | 1.00E+00 | 0.11  | 6.55E-01 | 9.48E-01 |
| <b>RPS23P8</b>    | 0.06  | 9.23E-01 | 1.00E+00 | -0.30 | 6.55E-01 | 9.48E-01 |

|                    |       |          |          |       |          |          |
|--------------------|-------|----------|----------|-------|----------|----------|
| <b>SSBP3</b>       | -0.38 | 1.33E-01 | 1.00E+00 | 0.14  | 6.55E-01 | 9.48E-01 |
| <b>MYO10</b>       | -0.13 | 5.65E-01 | 1.00E+00 | 0.18  | 6.55E-01 | 9.48E-01 |
| <b>SRRT</b>        | -0.50 | 1.24E-02 | 6.93E-01 | 0.16  | 6.55E-01 | 9.48E-01 |
| <b>SEC31A</b>      | -0.10 | 6.00E-01 | 1.00E+00 | 0.09  | 6.55E-01 | 9.48E-01 |
| <b>ZFP41</b>       | 0.25  | 5.29E-01 | 1.00E+00 | 0.29  | 6.55E-01 | 9.48E-01 |
| <b>ACSS3</b>       | 0.89  | 7.71E-02 | 1.00E+00 | -0.24 | 6.55E-01 | 9.48E-01 |
| <b>PDZD11</b>      | 0.06  | 7.10E-01 | 1.00E+00 | -0.12 | 6.55E-01 | 9.48E-01 |
| <b>XLOC_008504</b> | -1.58 | 4.67E-01 | 1.00E+00 | 0.54  | 6.55E-01 | 9.48E-01 |
| <b>OPRK1</b>       | 2.84  | 1.07E-01 | 1.00E+00 | -0.65 | 6.56E-01 | 9.48E-01 |
| <b>GNG12-AS1</b>   | -0.43 | 3.01E-01 | 1.00E+00 | -0.24 | 6.56E-01 | 9.48E-01 |
| <b>ENSAP2</b>      | -1.22 | 3.91E-01 | 1.00E+00 | -0.29 | 6.56E-01 | 9.48E-01 |
| <b>BTBD7</b>       | 0.36  | 8.27E-02 | 1.00E+00 | 0.09  | 6.56E-01 | 9.48E-01 |
| <b>XLOC_010367</b> | 1.38  | 6.90E-01 | 1.00E+00 | -0.57 | 6.56E-01 | 9.48E-01 |
| <b>GALR2</b>       | 0.14  | 8.84E-01 | 1.00E+00 | 0.51  | 6.56E-01 | 9.48E-01 |
| <b>PCCA-AS1</b>    | -0.70 | 8.41E-01 | 1.00E+00 | 0.64  | 6.56E-01 | 9.48E-01 |
| <b>THSD7B</b>      | 0.20  | 8.03E-01 | 1.00E+00 | -0.53 | 6.56E-01 | 9.48E-01 |
| <b>ARPC3P1</b>     | 0.26  | 9.40E-01 | 1.00E+00 | -0.31 | 6.56E-01 | 9.48E-01 |
| <b>REM2</b>        | -0.22 | 8.09E-01 | 1.00E+00 | -0.26 | 6.56E-01 | 9.48E-01 |
| <b>POLE2</b>       | 0.02  | 9.62E-01 | 1.00E+00 | 0.20  | 6.56E-01 | 9.48E-01 |
| <b>TMEM178B</b>    | -0.77 | 2.47E-01 | 1.00E+00 | -0.38 | 6.56E-01 | 9.48E-01 |
| <b>OXCT2</b>       | -1.92 | 4.22E-01 | 1.00E+00 | -0.41 | 6.56E-01 | 9.48E-01 |
| <b>AC068473.3</b>  | -1.96 | 6.52E-02 | 1.00E+00 | -0.45 | 6.56E-01 | 9.48E-01 |
| <b>CBX2</b>        | -0.43 | 1.24E-01 | 1.00E+00 | 0.20  | 6.56E-01 | 9.48E-01 |
| <b>TRHDE</b>       | 1.37  | 6.52E-02 | 1.00E+00 | -0.41 | 6.56E-01 | 9.49E-01 |
| <b>AC006213.2</b>  | -3.01 | 6.26E-02 | 1.00E+00 | 0.24  | 6.56E-01 | 9.49E-01 |
| <b>AIFM1</b>       | 0.12  | 6.93E-01 | 1.00E+00 | -0.15 | 6.56E-01 | 9.49E-01 |
| <b>RPS27AP16</b>   | -0.57 | 1.21E-01 | 1.00E+00 | -0.25 | 6.56E-01 | 9.49E-01 |
| <b>PDLIM4</b>      | -0.39 | 2.16E-01 | 1.00E+00 | -0.12 | 6.56E-01 | 9.49E-01 |
| <b>CCL1</b>        | -0.66 | 7.72E-01 | 1.00E+00 | -0.64 | 6.56E-01 | 9.49E-01 |
| <b>BAMBI</b>       | 0.04  | 9.61E-01 | 1.00E+00 | -0.33 | 6.56E-01 | 9.49E-01 |
| <b>XLOC_012210</b> | -0.57 | 8.42E-01 | 1.00E+00 | 0.64  | 6.56E-01 | 9.49E-01 |
| <b>C16orf95</b>    | -0.50 | 7.19E-01 | 1.00E+00 | -0.27 | 6.57E-01 | 9.49E-01 |

|             |       |          |          |       |          |          |
|-------------|-------|----------|----------|-------|----------|----------|
| BUB3        | -0.11 | 6.01E-01 | 1.00E+00 | -0.14 | 6.57E-01 | 9.49E-01 |
| FLJ16779    | -0.96 | 3.12E-01 | 1.00E+00 | -0.48 | 6.57E-01 | 9.49E-01 |
| DLG2        | 0.04  | 9.29E-01 | 1.00E+00 | -0.24 | 6.57E-01 | 9.49E-01 |
| TRIM63      | 0.31  | 4.94E-01 | 1.00E+00 | 0.30  | 6.57E-01 | 9.49E-01 |
| STARD8      | -0.01 | 9.89E-01 | 1.00E+00 | 0.36  | 6.57E-01 | 9.49E-01 |
| SLC16A12    | 1.07  | 6.15E-02 | 1.00E+00 | -0.42 | 6.57E-01 | 9.49E-01 |
| LHX6        | -0.51 | 2.32E-01 | 1.00E+00 | 0.27  | 6.57E-01 | 9.49E-01 |
| CCDC186     | -0.09 | 7.83E-01 | 1.00E+00 | -0.12 | 6.57E-01 | 9.49E-01 |
| FAF2        | -0.01 | 9.52E-01 | 1.00E+00 | -0.06 | 6.57E-01 | 9.49E-01 |
| GID4        | 0.24  | 3.66E-01 | 1.00E+00 | -0.18 | 6.57E-01 | 9.49E-01 |
| Z82195.2    | -3.01 | 3.64E-01 | 1.00E+00 | -0.80 | 6.57E-01 | 9.49E-01 |
| AP003392.1  | -1.10 | 3.93E-01 | 1.00E+00 | 0.40  | 6.57E-01 | 9.49E-01 |
| SMPDL3B     | -1.08 | 3.44E-02 | 1.00E+00 | 0.21  | 6.57E-01 | 9.49E-01 |
| VEGFB       | 0.39  | 2.89E-01 | 1.00E+00 | -0.23 | 6.57E-01 | 9.49E-01 |
| RGS2        | 0.22  | 4.95E-01 | 1.00E+00 | 0.13  | 6.57E-01 | 9.49E-01 |
| CHRNA1      | 0.45  | 8.24E-01 | 1.00E+00 | -0.58 | 6.57E-01 | 9.49E-01 |
| G35510      | -0.09 | 8.35E-01 | 1.00E+00 | 0.30  | 6.57E-01 | 9.49E-01 |
| TCF3        | -0.28 | 2.89E-01 | 1.00E+00 | 0.24  | 6.57E-01 | 9.49E-01 |
| NDUFS3      | -0.06 | 6.61E-01 | 1.00E+00 | -0.09 | 6.57E-01 | 9.49E-01 |
| LINC01018   | -0.19 | 8.13E-01 | 1.00E+00 | -0.40 | 6.57E-01 | 9.49E-01 |
| FASTK       | -0.10 | 6.08E-01 | 1.00E+00 | -0.10 | 6.58E-01 | 9.49E-01 |
| AC079630.1  | 0.54  | 3.07E-01 | 1.00E+00 | 0.33  | 6.58E-01 | 9.49E-01 |
| CEP44       | 0.06  | 8.42E-01 | 1.00E+00 | -0.14 | 6.58E-01 | 9.49E-01 |
| LINC00887   | 0.68  | 7.02E-01 | 1.00E+00 | -0.40 | 6.58E-01 | 9.49E-01 |
| AC023906.1  | 1.37  | 6.91E-01 | 1.00E+00 | -0.31 | 6.58E-01 | 9.49E-01 |
| PCDHGA1     | 0.27  | 6.11E-01 | 1.00E+00 | 0.45  | 6.58E-01 | 9.49E-01 |
| MSTO2P      | 0.04  | 9.61E-01 | 1.00E+00 | 0.34  | 6.58E-01 | 9.49E-01 |
| GJA1P1      | -0.64 | 6.25E-01 | 1.00E+00 | -0.30 | 6.58E-01 | 9.49E-01 |
| XLOC_001401 | 0.68  | 2.66E-01 | 1.00E+00 | -0.45 | 6.58E-01 | 9.49E-01 |
| TMEM179B    | 0.01  | 9.68E-01 | 1.00E+00 | -0.21 | 6.58E-01 | 9.49E-01 |
| AL713852.1  | -1.89 | 3.25E-01 | 1.00E+00 | -0.48 | 6.58E-01 | 9.49E-01 |
| snoU13      | 0.22  | 6.14E-01 | 1.00E+00 | 0.12  | 6.58E-01 | 9.49E-01 |



|                    |       |          |          |       |          |          |
|--------------------|-------|----------|----------|-------|----------|----------|
| <b>URB1-AS1</b>    | -0.24 | 4.43E-01 | 1.00E+00 | -0.14 | 6.58E-01 | 9.49E-01 |
| <b>NPM1P24</b>     | 1.22  | 6.21E-01 | 1.00E+00 | -0.32 | 6.58E-01 | 9.49E-01 |
| <b>AC119044.1</b>  | 0.36  | 8.30E-01 | 1.00E+00 | 0.46  | 6.58E-01 | 9.49E-01 |
| <b>AC116407.4</b>  | -1.45 | 4.10E-01 | 1.00E+00 | 0.50  | 6.58E-01 | 9.49E-01 |
| <b>AC072039.1</b>  | -1.47 | 6.70E-01 | 1.00E+00 | -1.19 | 6.58E-01 | 9.49E-01 |
| <b>ADCK1</b>       | -0.03 | 8.72E-01 | 1.00E+00 | -0.11 | 6.58E-01 | 9.49E-01 |
| <b>C2orf27A</b>    | -0.07 | 9.08E-01 | 1.00E+00 | 0.19  | 6.58E-01 | 9.49E-01 |
| <b>PARP1</b>       | -0.14 | 4.02E-01 | 1.00E+00 | 0.11  | 6.58E-01 | 9.49E-01 |
| <b>AC145285.2</b>  | 0.17  | 8.29E-01 | 1.00E+00 | 0.32  | 6.58E-01 | 9.49E-01 |
| <b>CASC3</b>       | -0.22 | 2.85E-01 | 1.00E+00 | -0.11 | 6.59E-01 | 9.49E-01 |
| <b>SNHG28</b>      | -0.42 | 5.04E-01 | 1.00E+00 | -0.14 | 6.59E-01 | 9.49E-01 |
| <b>AC005480.1</b>  | 1.31  | 7.03E-01 | 1.00E+00 | 0.74  | 6.59E-01 | 9.49E-01 |
| <b>HOXA11</b>      | 0.97  | 1.15E-01 | 1.00E+00 | 0.42  | 6.59E-01 | 9.49E-01 |
| <b>4-Sep</b>       | -0.43 | 3.68E-01 | 1.00E+00 | -0.16 | 6.59E-01 | 9.49E-01 |
| <b>SULT1C4</b>     | 0.77  | 2.95E-01 | 1.00E+00 | 0.32  | 6.59E-01 | 9.49E-01 |
| <b>BUB1</b>        | -0.05 | 8.70E-01 | 1.00E+00 | 0.24  | 6.59E-01 | 9.49E-01 |
| <b>FAM83F</b>      | 0.15  | 6.43E-01 | 1.00E+00 | -0.22 | 6.59E-01 | 9.49E-01 |
| <b>FEM1C</b>       | 0.01  | 9.62E-01 | 1.00E+00 | 0.12  | 6.59E-01 | 9.49E-01 |
| <b>MCM3AP</b>      | 0.07  | 7.67E-01 | 1.00E+00 | 0.19  | 6.59E-01 | 9.49E-01 |
| <b>NSUN2</b>       | -0.25 | 3.22E-01 | 1.00E+00 | -0.10 | 6.59E-01 | 9.49E-01 |
| <b>ZNF621</b>      | 0.29  | 4.42E-01 | 1.00E+00 | 0.20  | 6.59E-01 | 9.49E-01 |
| <b>EIF2S3B</b>     | -2.70 | 2.38E-02 | 9.16E-01 | -0.23 | 6.59E-01 | 9.49E-01 |
| <b>KIFC2</b>       | -0.46 | 2.13E-01 | 1.00E+00 | 0.41  | 6.59E-01 | 9.49E-01 |
| <b>PEG3</b>        | -0.20 | 7.20E-01 | 1.00E+00 | 0.21  | 6.59E-01 | 9.49E-01 |
| <b>MCPH1</b>       | -0.15 | 4.36E-01 | 1.00E+00 | 0.09  | 6.59E-01 | 9.49E-01 |
| <b>XLOC_009868</b> | -0.03 | 9.66E-01 | 1.00E+00 | 0.49  | 6.59E-01 | 9.49E-01 |
| <b>NPEPPS</b>      | 0.20  | 3.61E-01 | 1.00E+00 | 0.07  | 6.59E-01 | 9.49E-01 |
| <b>BX255925.3</b>  | 0.01  | 9.64E-01 | 1.00E+00 | 0.16  | 6.59E-01 | 9.49E-01 |
| <b>FOXI2</b>       | 0.30  | 4.99E-01 | 1.00E+00 | -0.42 | 6.59E-01 | 9.49E-01 |
| <b>AC007598.3</b>  | 1.64  | 5.50E-01 | 1.00E+00 | -0.68 | 6.59E-01 | 9.49E-01 |
| <b>TIPARP</b>      | -0.33 | 5.59E-01 | 1.00E+00 | 0.11  | 6.59E-01 | 9.49E-01 |
| <b>MFN1</b>        | 0.02  | 9.33E-01 | 1.00E+00 | 0.08  | 6.59E-01 | 9.49E-01 |

|            |        |          |          |       |          |          |
|------------|--------|----------|----------|-------|----------|----------|
| MAP2       | -0.26  | 4.58E-01 | 1.00E+00 | 0.16  | 6.59E-01 | 9.49E-01 |
| ZBED9      | 0.41   | 6.23E-01 | 1.00E+00 | 0.45  | 6.59E-01 | 9.49E-01 |
| CTH        | 0.52   | 2.34E-01 | 1.00E+00 | -0.25 | 6.59E-01 | 9.49E-01 |
| ZNF830     | 0.00   | 9.86E-01 | 1.00E+00 | 0.09  | 6.59E-01 | 9.49E-01 |
| PBLD       | 0.39   | 4.23E-01 | 1.00E+00 | 0.19  | 6.59E-01 | 9.49E-01 |
| BLOC1S6    | 0.21   | 4.30E-01 | 1.00E+00 | 0.11  | 6.59E-01 | 9.49E-01 |
| NVL        | 0.14   | 5.25E-01 | 1.00E+00 | -0.09 | 6.59E-01 | 9.49E-01 |
| F7         | -0.65  | 1.75E-01 | 1.00E+00 | 0.47  | 6.60E-01 | 9.49E-01 |
| UBR2       | 0.28   | 1.86E-01 | 1.00E+00 | -0.11 | 6.60E-01 | 9.49E-01 |
| AC103740.1 | -1.86  | 9.84E-02 | 1.00E+00 | 0.42  | 6.60E-01 | 9.49E-01 |
| KRTAP12-1  | -30.00 | 2.73E-18 | 5.54E-15 | -1.41 | 6.60E-01 | 9.49E-01 |
| HMMR       | 0.30   | 4.25E-01 | 1.00E+00 | -0.23 | 6.60E-01 | 9.49E-01 |
| SDHAF1     | -0.14  | 5.48E-01 | 1.00E+00 | 0.07  | 6.60E-01 | 9.49E-01 |
| ABCB9      | -0.18  | 6.65E-01 | 1.00E+00 | -0.25 | 6.60E-01 | 9.49E-01 |
| TMEM241    | 0.10   | 7.64E-01 | 1.00E+00 | 0.18  | 6.60E-01 | 9.49E-01 |
| TNFAIP8L1  | -0.05  | 8.24E-01 | 1.00E+00 | 0.22  | 6.60E-01 | 9.49E-01 |
| AC027097.1 | -0.28  | 7.39E-01 | 1.00E+00 | -0.18 | 6.60E-01 | 9.49E-01 |
| SNCAIP     | -0.17  | 6.71E-01 | 1.00E+00 | -0.20 | 6.60E-01 | 9.49E-01 |
| AC005332.3 | 0.04   | 9.64E-01 | 1.00E+00 | -0.24 | 6.60E-01 | 9.49E-01 |
| PCSK6      | -0.26  | 6.34E-01 | 1.00E+00 | 0.27  | 6.60E-01 | 9.49E-01 |
| TMEM41B    | 0.35   | 3.00E-01 | 1.00E+00 | -0.16 | 6.60E-01 | 9.49E-01 |
| SDR16C5    | 0.41   | 4.07E-01 | 1.00E+00 | -0.26 | 6.60E-01 | 9.49E-01 |
| AC118549.1 | 0.14   | 5.42E-01 | 1.00E+00 | 0.09  | 6.60E-01 | 9.49E-01 |
| DGKH       | -0.19  | 5.14E-01 | 1.00E+00 | 0.21  | 6.60E-01 | 9.49E-01 |
| NHSL1      | -0.30  | 4.69E-01 | 1.00E+00 | 0.15  | 6.61E-01 | 9.49E-01 |
| TBCAP1     | -1.50  | 5.52E-01 | 1.00E+00 | -0.26 | 6.61E-01 | 9.49E-01 |
| ARL13A     | 1.57   | 1.80E-01 | 1.00E+00 | -0.48 | 6.61E-01 | 9.49E-01 |
| AP1G1      | 0.27   | 2.12E-01 | 1.00E+00 | 0.12  | 6.61E-01 | 9.49E-01 |
| G22214     | 0.83   | 5.42E-01 | 1.00E+00 | -0.30 | 6.61E-01 | 9.49E-01 |
| IMPDH1     | 0.18   | 3.92E-01 | 1.00E+00 | 0.13  | 6.61E-01 | 9.49E-01 |
| ARHGEF18   | -0.35  | 5.54E-01 | 1.00E+00 | 0.22  | 6.61E-01 | 9.49E-01 |
| WWC2-AS2   | -0.47  | 2.47E-01 | 1.00E+00 | 0.36  | 6.61E-01 | 9.49E-01 |

|                    |       |          |          |       |          |          |
|--------------------|-------|----------|----------|-------|----------|----------|
| <b>KLHL22</b>      | -0.36 | 2.50E-01 | 1.00E+00 | 0.15  | 6.61E-01 | 9.49E-01 |
| <b>SPRYD3</b>      | 0.06  | 7.49E-01 | 1.00E+00 | 0.12  | 6.61E-01 | 9.49E-01 |
| <b>FAM85B</b>      | -0.39 | 7.68E-01 | 1.00E+00 | -0.31 | 6.61E-01 | 9.49E-01 |
| <b>RPL7AP6</b>     | -0.49 | 2.45E-01 | 1.00E+00 | 0.16  | 6.61E-01 | 9.49E-01 |
| <b>KRT13</b>       | 0.91  | 4.50E-01 | 1.00E+00 | 0.63  | 6.61E-01 | 9.49E-01 |
| <b>KLHL9</b>       | 0.14  | 6.26E-01 | 1.00E+00 | -0.07 | 6.61E-01 | 9.49E-01 |
| <b>LAG3</b>        | -0.02 | 9.71E-01 | 1.00E+00 | 1.37  | 6.61E-01 | 9.49E-01 |
| <b>TAF4B</b>       | 0.02  | 9.41E-01 | 1.00E+00 | -0.16 | 6.61E-01 | 9.49E-01 |
| <b>KLHL32</b>      | -1.22 | 3.95E-01 | 1.00E+00 | -0.53 | 6.61E-01 | 9.50E-01 |
| <b>TOR1AIP1</b>    | 0.39  | 7.80E-02 | 1.00E+00 | -0.09 | 6.61E-01 | 9.50E-01 |
| <b>TMEM74B</b>     | 0.15  | 7.05E-01 | 1.00E+00 | 0.33  | 6.61E-01 | 9.50E-01 |
| <b>OR51E1</b>      | 0.73  | 4.78E-01 | 1.00E+00 | 1.14  | 6.61E-01 | 9.50E-01 |
| <b>SIVA1</b>       | 0.00  | 9.87E-01 | 1.00E+00 | 0.10  | 6.61E-01 | 9.50E-01 |
| <b>ELAVL4</b>      | -2.31 | 1.04E-03 | 1.67E-01 | 0.36  | 6.61E-01 | 9.50E-01 |
| <b>KRT8P12</b>     | -0.38 | 2.96E-01 | 1.00E+00 | 0.25  | 6.62E-01 | 9.50E-01 |
| <b>C6orf163</b>    | -0.53 | 6.20E-01 | 1.00E+00 | -0.36 | 6.62E-01 | 9.50E-01 |
| <b>ZNF98</b>       | -1.62 | 3.81E-01 | 1.00E+00 | 0.50  | 6.62E-01 | 9.50E-01 |
| <b>IL17RD</b>      | 0.27  | 5.21E-01 | 1.00E+00 | 0.21  | 6.62E-01 | 9.50E-01 |
| <b>TOPBP1</b>      | 0.09  | 6.39E-01 | 1.00E+00 | -0.17 | 6.62E-01 | 9.50E-01 |
| <b>CLBA1</b>       | -0.23 | 3.35E-01 | 1.00E+00 | -0.24 | 6.62E-01 | 9.50E-01 |
| <b>C1GALT1</b>     | -0.13 | 6.87E-01 | 1.00E+00 | -0.09 | 6.62E-01 | 9.50E-01 |
| <b>AC093627.6</b>  | -0.21 | 8.49E-01 | 1.00E+00 | 0.47  | 6.62E-01 | 9.50E-01 |
| <b>CCDC102A</b>    | -0.10 | 7.06E-01 | 1.00E+00 | 0.23  | 6.62E-01 | 9.50E-01 |
| <b>MS4A3</b>       | 0.44  | 8.98E-01 | 1.00E+00 | 0.80  | 6.62E-01 | 9.50E-01 |
| <b>IFNA20P</b>     | 0.87  | 6.12E-01 | 1.00E+00 | -0.50 | 6.62E-01 | 9.50E-01 |
| <b>RIMBP3B</b>     | 0.43  | 7.18E-01 | 1.00E+00 | 0.67  | 6.62E-01 | 9.50E-01 |
| <b>XLOC_002384</b> | -0.06 | 9.59E-01 | 1.00E+00 | -0.35 | 6.62E-01 | 9.50E-01 |
| <b>AC073611.1</b>  | -1.02 | 7.49E-01 | 1.00E+00 | 0.29  | 6.62E-01 | 9.50E-01 |
| <b>RAD50</b>       | -0.55 | 2.39E-01 | 1.00E+00 | -0.16 | 6.62E-01 | 9.50E-01 |
| <b>DICER1</b>      | 0.12  | 5.73E-01 | 1.00E+00 | 0.12  | 6.62E-01 | 9.50E-01 |
| <b>CSNK1G2</b>     | -0.27 | 2.86E-01 | 1.00E+00 | 0.25  | 6.62E-01 | 9.50E-01 |
| <b>VPS37D</b>      | 0.13  | 7.50E-01 | 1.00E+00 | -1.38 | 6.62E-01 | 9.50E-01 |

|            |       |          |          |       |          |          |
|------------|-------|----------|----------|-------|----------|----------|
| ZNF785     | 0.06  | 8.77E-01 | 1.00E+00 | -0.23 | 6.62E-01 | 9.50E-01 |
| 2-Sep      | 0.24  | 3.13E-01 | 1.00E+00 | -0.12 | 6.62E-01 | 9.50E-01 |
| ZBTB10     | 0.15  | 6.26E-01 | 1.00E+00 | 0.20  | 6.63E-01 | 9.50E-01 |
| PSD2       | -0.18 | 8.88E-01 | 1.00E+00 | -0.57 | 6.63E-01 | 9.50E-01 |
| VPS51      | -0.08 | 7.94E-01 | 1.00E+00 | 0.15  | 6.63E-01 | 9.50E-01 |
| DENND2A    | 0.51  | 2.95E-01 | 1.00E+00 | 0.37  | 6.63E-01 | 9.51E-01 |
| NDUFA11    | 0.05  | 9.19E-01 | 1.00E+00 | -0.26 | 6.63E-01 | 9.51E-01 |
| AC093484.4 | -1.82 | 4.45E-01 | 1.00E+00 | -0.36 | 6.63E-01 | 9.51E-01 |
| WAC-AS1    | -0.01 | 9.76E-01 | 1.00E+00 | 0.16  | 6.63E-01 | 9.51E-01 |
| PER2       | -0.98 | 5.09E-03 | 4.18E-01 | -0.14 | 6.63E-01 | 9.51E-01 |
| FAM227A    | 0.10  | 8.21E-01 | 1.00E+00 | -0.38 | 6.63E-01 | 9.51E-01 |
| ST18       | -4.31 | 5.40E-04 | 1.05E-01 | 0.65  | 6.64E-01 | 9.51E-01 |
| PPP3CA     | -0.22 | 2.06E-01 | 1.00E+00 | 0.14  | 6.64E-01 | 9.51E-01 |
| AC009093.2 | -0.13 | 8.95E-01 | 1.00E+00 | 0.29  | 6.64E-01 | 9.51E-01 |
| PTTG1IP    | -0.08 | 7.42E-01 | 1.00E+00 | -0.09 | 6.64E-01 | 9.51E-01 |
| DDIT4L     | -0.57 | 3.67E-01 | 1.00E+00 | -0.31 | 6.64E-01 | 9.51E-01 |
| TMEM268    | -0.16 | 6.83E-01 | 1.00E+00 | 0.26  | 6.64E-01 | 9.51E-01 |
| SLC35B1    | -0.19 | 3.17E-01 | 1.00E+00 | -0.06 | 6.64E-01 | 9.51E-01 |
| AC008747.1 | -3.28 | 2.65E-01 | 1.00E+00 | -0.42 | 6.64E-01 | 9.51E-01 |
| AC090519.1 | 0.23  | 8.64E-01 | 1.00E+00 | -0.53 | 6.64E-01 | 9.51E-01 |
| AC018809.2 | -0.15 | 6.07E-01 | 1.00E+00 | 0.25  | 6.64E-01 | 9.51E-01 |
| ITFG2      | 0.03  | 9.15E-01 | 1.00E+00 | 0.07  | 6.64E-01 | 9.51E-01 |
| AC025171.4 | 1.10  | 5.19E-01 | 1.00E+00 | 0.48  | 6.64E-01 | 9.51E-01 |
| AC005224.3 | 1.50  | 6.61E-01 | 1.00E+00 | -0.56 | 6.64E-01 | 9.51E-01 |
| AC106786.1 | -0.11 | 9.13E-01 | 1.00E+00 | 0.42  | 6.64E-01 | 9.51E-01 |
| AC103746.1 | 0.07  | 9.43E-01 | 1.00E+00 | 0.57  | 6.64E-01 | 9.51E-01 |
| MYO15A     | -0.52 | 5.99E-01 | 1.00E+00 | 0.42  | 6.64E-01 | 9.51E-01 |
| DUSP11     | 0.00  | 9.99E-01 | 1.00E+00 | -0.16 | 6.64E-01 | 9.51E-01 |
| G39463     | 0.64  | 5.28E-01 | 1.00E+00 | -0.39 | 6.64E-01 | 9.51E-01 |
| AC243836.1 | 3.10  | 2.02E-01 | 1.00E+00 | 0.72  | 6.64E-01 | 9.51E-01 |
| INPP5J     | -0.58 | 1.41E-01 | 1.00E+00 | 0.23  | 6.64E-01 | 9.51E-01 |
| AC068473.4 | -1.92 | 1.52E-02 | 7.65E-01 | -0.39 | 6.64E-01 | 9.51E-01 |

|                   |       |          |          |       |          |          |
|-------------------|-------|----------|----------|-------|----------|----------|
| <b>MPHOSPH8</b>   | 0.22  | 3.30E-01 | 1.00E+00 | 0.12  | 6.64E-01 | 9.51E-01 |
| <b>CALHM4</b>     | -3.78 | 2.28E-01 | 1.00E+00 | -1.39 | 6.64E-01 | 9.51E-01 |
| <b>AC023590.1</b> | -1.68 | 6.27E-01 | 1.00E+00 | 0.47  | 6.65E-01 | 9.51E-01 |
| <b>AARS</b>       | -0.13 | 6.56E-01 | 1.00E+00 | 0.14  | 6.65E-01 | 9.51E-01 |
| <b>RPSAP19</b>    | 0.24  | 7.43E-01 | 1.00E+00 | -0.21 | 6.65E-01 | 9.51E-01 |
| <b>RPL10P6</b>    | 0.04  | 9.74E-01 | 1.00E+00 | 0.37  | 6.65E-01 | 9.51E-01 |
| <b>AC079949.1</b> | 0.10  | 7.86E-01 | 1.00E+00 | -0.46 | 6.65E-01 | 9.51E-01 |
| <b>AC113143.1</b> | -0.44 | 9.00E-01 | 1.00E+00 | 0.61  | 6.65E-01 | 9.51E-01 |
| <b>PMS2CL</b>     | -0.45 | 1.71E-01 | 1.00E+00 | 0.20  | 6.65E-01 | 9.51E-01 |
| <b>MMS19</b>      | 0.01  | 9.49E-01 | 1.00E+00 | 0.12  | 6.65E-01 | 9.51E-01 |
| <b>EIF4H</b>      | 0.00  | 9.86E-01 | 1.00E+00 | 0.07  | 6.65E-01 | 9.51E-01 |
| <b>WNT2</b>       | 0.02  | 9.68E-01 | 1.00E+00 | 0.26  | 6.65E-01 | 9.51E-01 |
| <b>AL121753.2</b> | -0.15 | 7.16E-01 | 1.00E+00 | -0.18 | 6.65E-01 | 9.51E-01 |
| <b>FAM50A</b>     | -0.01 | 9.58E-01 | 1.00E+00 | 0.16  | 6.65E-01 | 9.51E-01 |
| <b>AC092306.1</b> | -0.35 | 4.62E-01 | 1.00E+00 | 0.30  | 6.65E-01 | 9.51E-01 |
| <b>ATP13A4</b>    | 0.16  | 6.77E-01 | 1.00E+00 | -0.21 | 6.65E-01 | 9.51E-01 |
| <b>EXOSC7</b>     | 0.40  | 1.25E-01 | 1.00E+00 | -0.17 | 6.65E-01 | 9.51E-01 |
| <b>LCLAT1</b>     | 0.04  | 8.92E-01 | 1.00E+00 | 0.15  | 6.65E-01 | 9.51E-01 |
| <b>AL592295.4</b> | -0.74 | 1.46E-01 | 1.00E+00 | 0.37  | 6.66E-01 | 9.51E-01 |
| <b>PLD1</b>       | -0.07 | 8.34E-01 | 1.00E+00 | -0.16 | 6.66E-01 | 9.51E-01 |
| <b>ESRP1</b>      | -0.03 | 9.38E-01 | 1.00E+00 | 0.24  | 6.66E-01 | 9.51E-01 |
| <b>MAFB</b>       | -0.70 | 1.75E-01 | 1.00E+00 | 0.20  | 6.66E-01 | 9.51E-01 |
| <b>SERPINB8</b>   | -0.08 | 8.68E-01 | 1.00E+00 | -0.14 | 6.66E-01 | 9.51E-01 |
| <b>CCNA1</b>      | -1.27 | 2.90E-01 | 1.00E+00 | 0.52  | 6.66E-01 | 9.51E-01 |
| <b>SLC25A36</b>   | 0.24  | 4.07E-01 | 1.00E+00 | -0.13 | 6.66E-01 | 9.51E-01 |
| <b>KLLN</b>       | 0.09  | 8.28E-01 | 1.00E+00 | -0.23 | 6.66E-01 | 9.51E-01 |
| <b>AC008268.1</b> | 1.44  | 2.48E-01 | 1.00E+00 | -1.38 | 6.66E-01 | 9.51E-01 |
| <b>LINC01752</b>  | 0.66  | 6.17E-01 | 1.00E+00 | -0.42 | 6.66E-01 | 9.51E-01 |
| <b>PPP2R5C</b>    | 0.07  | 6.25E-01 | 1.00E+00 | 0.09  | 6.66E-01 | 9.51E-01 |
| <b>LONRF3</b>     | 0.09  | 8.89E-01 | 1.00E+00 | -0.31 | 6.66E-01 | 9.51E-01 |
| <b>RPS26P6</b>    | -0.33 | 7.01E-01 | 1.00E+00 | 0.28  | 6.66E-01 | 9.51E-01 |
| <b>LINC01886</b>  | -0.59 | 6.93E-01 | 1.00E+00 | -0.54 | 6.66E-01 | 9.51E-01 |

|                   |       |          |          |       |          |          |
|-------------------|-------|----------|----------|-------|----------|----------|
| <b>FBF1</b>       | -0.20 | 6.41E-01 | 1.00E+00 | -0.23 | 6.66E-01 | 9.51E-01 |
| <b>AC009061.2</b> | 0.15  | 8.31E-01 | 1.00E+00 | -0.25 | 6.66E-01 | 9.51E-01 |
| <b>SS18</b>       | 0.04  | 8.79E-01 | 1.00E+00 | 0.08  | 6.66E-01 | 9.51E-01 |
| <b>AL356653.1</b> | -0.08 | 9.82E-01 | 1.00E+00 | -0.30 | 6.66E-01 | 9.51E-01 |
| <b>RHOQ</b>       | 0.38  | 3.15E-01 | 1.00E+00 | -0.21 | 6.66E-01 | 9.51E-01 |
| <b>IL12A-AS1</b>  | -0.22 | 8.89E-01 | 1.00E+00 | 0.58  | 6.66E-01 | 9.51E-01 |
| <b>AC106881.1</b> | -0.21 | 8.35E-01 | 1.00E+00 | -0.44 | 6.66E-01 | 9.51E-01 |
| <b>FLRT3</b>      | -0.03 | 9.35E-01 | 1.00E+00 | 0.23  | 6.66E-01 | 9.51E-01 |
| <b>CCDC17</b>     | 0.80  | 1.88E-01 | 1.00E+00 | -0.37 | 6.66E-01 | 9.51E-01 |
| <b>MPHOSPH6</b>   | 0.10  | 7.18E-01 | 1.00E+00 | -0.15 | 6.66E-01 | 9.51E-01 |
| <b>AC145343.1</b> | -0.52 | 7.86E-01 | 1.00E+00 | 0.62  | 6.66E-01 | 9.51E-01 |
| <b>HSDL1</b>      | 0.23  | 4.26E-01 | 1.00E+00 | 0.15  | 6.66E-01 | 9.51E-01 |
| <b>DOLPP1</b>     | -0.03 | 9.12E-01 | 1.00E+00 | -0.10 | 6.66E-01 | 9.51E-01 |
| <b>AC093591.1</b> | 0.88  | 7.04E-01 | 1.00E+00 | -0.31 | 6.67E-01 | 9.51E-01 |
| <b>PPM1D</b>      | -0.14 | 6.58E-01 | 1.00E+00 | 0.14  | 6.67E-01 | 9.51E-01 |
| <b>MAB21L2</b>    | 0.08  | 9.79E-01 | 1.00E+00 | 0.65  | 6.67E-01 | 9.51E-01 |
| <b>VANGL1</b>     | 0.04  | 8.62E-01 | 1.00E+00 | 0.10  | 6.67E-01 | 9.51E-01 |
| <b>C15orf48</b>   | 0.98  | 1.11E-01 | 1.00E+00 | -0.31 | 6.67E-01 | 9.51E-01 |
| <b>AC068305.2</b> | -0.11 | 8.96E-01 | 1.00E+00 | 0.28  | 6.67E-01 | 9.51E-01 |
| <b>CDH5</b>       | 0.24  | 6.32E-01 | 1.00E+00 | 0.27  | 6.67E-01 | 9.51E-01 |
| <b>AC073415.1</b> | -1.01 | 3.51E-01 | 1.00E+00 | 0.42  | 6.67E-01 | 9.51E-01 |
| <b>AC068533.3</b> | 4.47  | 7.17E-02 | 1.00E+00 | -0.65 | 6.67E-01 | 9.51E-01 |
| <b>XIRP1</b>      | 3.00  | 1.11E-01 | 1.00E+00 | 1.37  | 6.67E-01 | 9.51E-01 |
| <b>PEX6</b>       | -0.25 | 3.59E-01 | 1.00E+00 | -0.24 | 6.67E-01 | 9.51E-01 |
| <b>MYH15</b>      | -0.97 | 2.05E-01 | 1.00E+00 | -0.31 | 6.67E-01 | 9.51E-01 |
| <b>AGO2</b>       | 0.08  | 8.31E-01 | 1.00E+00 | 0.14  | 6.67E-01 | 9.51E-01 |
| <b>ATP2B1</b>     | -0.05 | 8.22E-01 | 1.00E+00 | 0.12  | 6.67E-01 | 9.51E-01 |
| <b>FAAP100</b>    | -0.48 | 5.64E-02 | 1.00E+00 | 0.22  | 6.67E-01 | 9.51E-01 |
| <b>NSMCE1</b>     | -0.02 | 8.99E-01 | 1.00E+00 | -0.09 | 6.67E-01 | 9.51E-01 |
| <b>GINS3</b>      | -0.13 | 6.76E-01 | 1.00E+00 | 0.15  | 6.67E-01 | 9.51E-01 |
| <b>AL118522.1</b> | -0.41 | 6.36E-01 | 1.00E+00 | -0.31 | 6.67E-01 | 9.51E-01 |
| <b>AL158827.2</b> | -1.37 | 4.55E-01 | 1.00E+00 | -0.66 | 6.67E-01 | 9.51E-01 |

|                   |        |          |          |       |          |          |
|-------------------|--------|----------|----------|-------|----------|----------|
| <b>BMP6</b>       | 0.29   | 5.84E-01 | 1.00E+00 | 0.31  | 6.67E-01 | 9.51E-01 |
| <b>LAMTOR1</b>    | 0.03   | 8.59E-01 | 1.00E+00 | 0.07  | 6.67E-01 | 9.51E-01 |
| <b>ANKS1B</b>     | -0.64  | 3.02E-01 | 1.00E+00 | -0.26 | 6.67E-01 | 9.51E-01 |
| <b>ATP1A4</b>     | -2.39  | 2.25E-01 | 1.00E+00 | -0.48 | 6.67E-01 | 9.51E-01 |
| <b>KRTAP4-9</b>   | -19.72 | 5.40E-09 | 2.68E-06 | -1.38 | 6.67E-01 | 9.51E-01 |
| <b>LINC02247</b>  | 0.47   | 3.85E-01 | 1.00E+00 | -0.28 | 6.67E-01 | 9.51E-01 |
| <b>FRMD6-AS2</b>  | 0.06   | 9.71E-01 | 1.00E+00 | 0.37  | 6.67E-01 | 9.51E-01 |
| <b>NTNG1</b>      | -1.85  | 6.64E-03 | 4.94E-01 | 0.34  | 6.67E-01 | 9.51E-01 |
| <b>ACSL5</b>      | 0.12   | 7.67E-01 | 1.00E+00 | 0.19  | 6.67E-01 | 9.51E-01 |
| <b>AC139099.1</b> | -2.36  | 3.16E-01 | 1.00E+00 | 0.42  | 6.67E-01 | 9.51E-01 |
| <b>SCN3A</b>      | 1.01   | 1.76E-01 | 1.00E+00 | 0.33  | 6.68E-01 | 9.51E-01 |
| <b>AK6P1</b>      | NA     | NA       | NA       | 0.64  | 6.68E-01 | 9.51E-01 |
| <b>SLC25A14</b>   | 0.18   | 5.59E-01 | 1.00E+00 | -0.13 | 6.68E-01 | 9.51E-01 |
| <b>NEIL1</b>      | 0.59   | 7.75E-02 | 1.00E+00 | -0.18 | 6.68E-01 | 9.51E-01 |
| <b>ACKR3</b>      | 0.23   | 5.31E-01 | 1.00E+00 | -0.33 | 6.68E-01 | 9.51E-01 |
| <b>ERVFRD-1</b>   | 1.55   | 2.66E-01 | 1.00E+00 | 0.46  | 6.68E-01 | 9.51E-01 |
| <b>RAP1A</b>      | 0.08   | 7.36E-01 | 1.00E+00 | 0.11  | 6.68E-01 | 9.51E-01 |
| <b>FXVD6</b>      | 0.06   | 8.89E-01 | 1.00E+00 | -0.16 | 6.68E-01 | 9.51E-01 |
| <b>USP47</b>      | 0.04   | 7.96E-01 | 1.00E+00 | -0.08 | 6.68E-01 | 9.51E-01 |
| <b>POMC</b>       | -0.50  | 2.72E-01 | 1.00E+00 | 0.13  | 6.68E-01 | 9.51E-01 |
| <b>8-Mar</b>      | 0.13   | 5.59E-01 | 1.00E+00 | 0.15  | 6.68E-01 | 9.51E-01 |
| <b>CDH17</b>      | -0.89  | 6.27E-01 | 1.00E+00 | 0.70  | 6.68E-01 | 9.51E-01 |
| <b>TMEM231</b>    | 0.35   | 1.15E-01 | 1.00E+00 | 0.15  | 6.68E-01 | 9.51E-01 |
| <b>VCP</b>        | -0.03  | 8.65E-01 | 1.00E+00 | 0.07  | 6.68E-01 | 9.51E-01 |
| <b>DLX3</b>       | -0.08  | 8.54E-01 | 1.00E+00 | -0.26 | 6.68E-01 | 9.51E-01 |
| <b>GPC4</b>       | -0.13  | 7.62E-01 | 1.00E+00 | 0.23  | 6.68E-01 | 9.51E-01 |
| <b>G38113</b>     | 0.04   | 9.74E-01 | 1.00E+00 | -0.43 | 6.68E-01 | 9.51E-01 |
| <b>AL391244.2</b> | -0.74  | 2.42E-01 | 1.00E+00 | -0.50 | 6.68E-01 | 9.51E-01 |
| <b>WDR36</b>      | 0.17   | 5.29E-01 | 1.00E+00 | -0.10 | 6.68E-01 | 9.51E-01 |
| <b>CCT6P3</b>     | 0.46   | 2.98E-01 | 1.00E+00 | -0.22 | 6.68E-01 | 9.51E-01 |
| <b>MRPS18C</b>    | 0.42   | 1.79E-01 | 1.00E+00 | 0.22  | 6.68E-01 | 9.51E-01 |
| <b>AC023078.1</b> | 0.50   | 6.63E-01 | 1.00E+00 | 0.36  | 6.68E-01 | 9.51E-01 |

|                    |       |          |          |       |          |          |
|--------------------|-------|----------|----------|-------|----------|----------|
| <b>AC019080.3</b>  | 1.09  | 4.55E-01 | 1.00E+00 | -0.52 | 6.68E-01 | 9.51E-01 |
| RTL3               | -0.55 | 5.05E-01 | 1.00E+00 | -0.45 | 6.68E-01 | 9.51E-01 |
| HSPA2              | -0.31 | 3.00E-01 | 1.00E+00 | -0.12 | 6.68E-01 | 9.51E-01 |
| ZNF320             | 0.82  | 3.10E-01 | 1.00E+00 | 0.26  | 6.68E-01 | 9.51E-01 |
| <b>AC005911.1</b>  | -1.26 | 1.83E-01 | 1.00E+00 | 0.24  | 6.68E-01 | 9.51E-01 |
| <b>XLOC_011384</b> | 0.81  | 4.25E-01 | 1.00E+00 | 0.37  | 6.69E-01 | 9.51E-01 |
| ARHGDIG            | -1.51 | 6.51E-01 | 1.00E+00 | -0.51 | 6.69E-01 | 9.51E-01 |
| ANKRD39            | -0.10 | 7.97E-01 | 1.00E+00 | -0.21 | 6.69E-01 | 9.52E-01 |
| PDIA6              | 0.09  | 6.06E-01 | 1.00E+00 | 0.08  | 6.69E-01 | 9.52E-01 |
| PTK2               | 0.15  | 4.81E-01 | 1.00E+00 | 0.11  | 6.69E-01 | 9.52E-01 |
| HSCB               | 0.07  | 7.94E-01 | 1.00E+00 | -0.10 | 6.69E-01 | 9.52E-01 |
| RUFY4              | -2.87 | 2.87E-01 | 1.00E+00 | 1.36  | 6.69E-01 | 9.52E-01 |
| RTF2               | -0.04 | 7.91E-01 | 1.00E+00 | -0.08 | 6.69E-01 | 9.52E-01 |
| ZNF37A             | -0.01 | 9.67E-01 | 1.00E+00 | 0.11  | 6.69E-01 | 9.52E-01 |
| RPL7               | -0.08 | 8.22E-01 | 1.00E+00 | 0.17  | 6.69E-01 | 9.52E-01 |
| <b>FAM151A</b>     | -4.17 | 1.62E-03 | 2.24E-01 | 0.48  | 6.69E-01 | 9.52E-01 |
| EEF1E1             | 0.10  | 8.42E-01 | 1.00E+00 | -0.25 | 6.69E-01 | 9.52E-01 |
| MASP2              | 0.19  | 8.54E-01 | 1.00E+00 | -0.55 | 6.69E-01 | 9.52E-01 |
| INTS1              | -0.25 | 3.08E-01 | 1.00E+00 | 0.26  | 6.69E-01 | 9.52E-01 |
| GSAP               | 0.57  | 1.31E-01 | 1.00E+00 | 0.17  | 6.69E-01 | 9.52E-01 |
| NBPF3              | -0.34 | 3.92E-01 | 1.00E+00 | 0.18  | 6.70E-01 | 9.52E-01 |
| RPL5P30            | 0.59  | 6.08E-01 | 1.00E+00 | 0.36  | 6.70E-01 | 9.52E-01 |
| C4orf47            | -1.78 | 2.99E-03 | 2.87E-01 | -0.25 | 6.70E-01 | 9.52E-01 |
| PCDHGC5            | -1.36 | 2.17E-01 | 1.00E+00 | 1.36  | 6.70E-01 | 9.52E-01 |
| SMARCA2            | -0.03 | 8.43E-01 | 1.00E+00 | -0.13 | 6.70E-01 | 9.52E-01 |
| <b>AC096887.2</b>  | 0.18  | 8.70E-01 | 1.00E+00 | 0.42  | 6.70E-01 | 9.52E-01 |
| <b>AP001636.1</b>  | -0.21 | 9.53E-01 | 1.00E+00 | -0.39 | 6.70E-01 | 9.52E-01 |
| GTF2IP7            | -2.24 | 4.20E-01 | 1.00E+00 | 0.45  | 6.70E-01 | 9.52E-01 |
| ZDHHC19            | 0.22  | 9.47E-01 | 1.00E+00 | 0.81  | 6.70E-01 | 9.52E-01 |
| CNGB1              | -4.49 | 2.72E-03 | 2.69E-01 | 1.35  | 6.70E-01 | 9.52E-01 |
| PROM1              | 0.46  | 5.90E-01 | 1.00E+00 | -1.28 | 6.70E-01 | 9.52E-01 |
| <b>NBPF17P</b>     | -0.56 | 8.73E-01 | 1.00E+00 | -0.40 | 6.70E-01 | 9.52E-01 |



|                   |       |          |          |       |          |          |
|-------------------|-------|----------|----------|-------|----------|----------|
| <b>PPTC7</b>      | 0.20  | 3.78E-01 | 1.00E+00 | 0.16  | 6.70E-01 | 9.52E-01 |
| <b>BRINP1</b>     | -0.77 | 5.43E-01 | 1.00E+00 | 0.50  | 6.70E-01 | 9.52E-01 |
| <b>ASRGL1</b>     | -0.08 | 9.24E-01 | 1.00E+00 | -0.26 | 6.70E-01 | 9.52E-01 |
| <b>RPS29P5</b>    | -0.80 | 8.18E-01 | 1.00E+00 | 0.36  | 6.71E-01 | 9.52E-01 |
| <b>ZSCAN12</b>    | 0.04  | 9.07E-01 | 1.00E+00 | 0.23  | 6.71E-01 | 9.52E-01 |
| <b>KLHDC10</b>    | 0.36  | 2.02E-01 | 1.00E+00 | 0.13  | 6.71E-01 | 9.52E-01 |
| <b>MRPS2</b>      | 0.17  | 5.10E-01 | 1.00E+00 | 0.09  | 6.71E-01 | 9.52E-01 |
| <b>SCARB1</b>     | 0.22  | 4.34E-01 | 1.00E+00 | -0.14 | 6.71E-01 | 9.52E-01 |
| <b>COPS7A</b>     | -0.04 | 7.96E-01 | 1.00E+00 | -0.05 | 6.71E-01 | 9.52E-01 |
| <b>RMRPP2</b>     | 0.10  | 8.57E-01 | 1.00E+00 | 0.39  | 6.71E-01 | 9.52E-01 |
| <b>IFNLR1</b>     | -0.12 | 7.67E-01 | 1.00E+00 | -0.22 | 6.71E-01 | 9.52E-01 |
| <b>RPL36AL</b>    | -0.06 | 7.46E-01 | 1.00E+00 | 0.13  | 6.71E-01 | 9.52E-01 |
| <b>C2orf70</b>    | -0.56 | 6.37E-01 | 1.00E+00 | 0.54  | 6.71E-01 | 9.52E-01 |
| <b>GRASP</b>      | -0.15 | 6.80E-01 | 1.00E+00 | 0.37  | 6.71E-01 | 9.52E-01 |
| <b>VPS28</b>      | -0.15 | 4.85E-01 | 1.00E+00 | 0.07  | 6.71E-01 | 9.52E-01 |
| <b>C12orf76</b>   | 0.03  | 9.13E-01 | 1.00E+00 | -0.19 | 6.71E-01 | 9.52E-01 |
| <b>IMPAD1</b>     | 0.15  | 5.65E-01 | 1.00E+00 | -0.17 | 6.71E-01 | 9.52E-01 |
| <b>AC022417.1</b> | -0.37 | 6.74E-01 | 1.00E+00 | -0.38 | 6.71E-01 | 9.52E-01 |
| <b>GOSR1</b>      | -0.02 | 8.96E-01 | 1.00E+00 | 0.05  | 6.71E-01 | 9.52E-01 |
| <b>GREB1L</b>     | 0.76  | 2.98E-01 | 1.00E+00 | 0.31  | 6.71E-01 | 9.52E-01 |
| <b>TAF6L</b>      | -0.31 | 1.84E-01 | 1.00E+00 | -0.34 | 6.71E-01 | 9.52E-01 |
| <b>NRDC</b>       | 0.12  | 7.00E-01 | 1.00E+00 | 0.06  | 6.71E-01 | 9.52E-01 |
| <b>SRRM2-AS1</b>  | 0.22  | 7.87E-01 | 1.00E+00 | -0.25 | 6.71E-01 | 9.52E-01 |
| <b>MYNN</b>       | 0.03  | 9.17E-01 | 1.00E+00 | -0.14 | 6.71E-01 | 9.52E-01 |
| <b>POLA2</b>      | 0.16  | 7.24E-01 | 1.00E+00 | 0.13  | 6.71E-01 | 9.52E-01 |
| <b>AL603750.1</b> | 0.98  | 3.43E-01 | 1.00E+00 | 0.52  | 6.71E-01 | 9.52E-01 |
| <b>MEMO1</b>      | 0.18  | 6.81E-01 | 1.00E+00 | -0.17 | 6.71E-01 | 9.52E-01 |
| <b>ACTL10</b>     | -0.79 | 1.13E-01 | 1.00E+00 | -0.28 | 6.71E-01 | 9.52E-01 |
| <b>NAA50</b>      | 0.10  | 5.76E-01 | 1.00E+00 | 0.10  | 6.71E-01 | 9.52E-01 |
| <b>HIST1H2BN</b>  | 0.67  | 3.06E-01 | 1.00E+00 | 0.20  | 6.72E-01 | 9.52E-01 |
| <b>NRP1</b>       | 0.27  | 4.75E-01 | 1.00E+00 | 0.16  | 6.72E-01 | 9.52E-01 |
| <b>PMP2</b>       | -0.85 | 1.10E-01 | 1.00E+00 | 0.32  | 6.72E-01 | 9.52E-01 |

|                    |       |          |          |       |          |          |
|--------------------|-------|----------|----------|-------|----------|----------|
| <b>RFT1</b>        | 0.03  | 8.70E-01 | 1.00E+00 | 0.09  | 6.72E-01 | 9.53E-01 |
| <b>AP001453.2</b>  | NA    | NA       | NA       | 0.41  | 6.72E-01 | 9.53E-01 |
| <b>LINC02363</b>   | 1.34  | 4.10E-01 | 1.00E+00 | -0.40 | 6.72E-01 | 9.53E-01 |
| <b>AC026271.3</b>  | 0.38  | 3.46E-01 | 1.00E+00 | 0.28  | 6.72E-01 | 9.53E-01 |
| <b>GAPDHP35</b>    | NA    | NA       | NA       | 0.56  | 6.72E-01 | 9.53E-01 |
| <b>PTK6</b>        | 0.06  | 8.96E-01 | 1.00E+00 | -0.22 | 6.72E-01 | 9.53E-01 |
| <b>EHD1</b>        | -0.23 | 3.46E-01 | 1.00E+00 | 0.19  | 6.72E-01 | 9.53E-01 |
| <b>XLOC_013243</b> | 0.92  | 7.83E-01 | 1.00E+00 | -1.35 | 6.72E-01 | 9.53E-01 |
| <b>LIN52</b>       | 0.10  | 6.42E-01 | 1.00E+00 | 0.12  | 6.72E-01 | 9.53E-01 |
| <b>VAR52</b>       | -0.06 | 8.06E-01 | 1.00E+00 | 0.25  | 6.72E-01 | 9.53E-01 |
| <b>RBM3</b>        | -0.19 | 4.67E-01 | 1.00E+00 | -0.08 | 6.72E-01 | 9.53E-01 |
| <b>PPP4R3A</b>     | -0.04 | 8.79E-01 | 1.00E+00 | -0.16 | 6.72E-01 | 9.53E-01 |
| <b>NQO2</b>        | 0.16  | 5.77E-01 | 1.00E+00 | -0.13 | 6.72E-01 | 9.53E-01 |
| <b>GPR37L1</b>     | -3.41 | 8.17E-02 | 1.00E+00 | -0.47 | 6.72E-01 | 9.53E-01 |
| <b>ACSL6</b>       | 0.50  | 6.22E-01 | 1.00E+00 | 0.39  | 6.72E-01 | 9.53E-01 |
| <b>ZNF793-AS1</b>  | -0.49 | 4.66E-01 | 1.00E+00 | -0.23 | 6.72E-01 | 9.53E-01 |
| <b>PEAR1</b>       | 0.29  | 5.40E-01 | 1.00E+00 | 0.30  | 6.72E-01 | 9.53E-01 |
| <b>KLHL36</b>      | 0.37  | 2.98E-01 | 1.00E+00 | 0.12  | 6.73E-01 | 9.53E-01 |
| <b>SNHG18</b>      | -0.14 | 7.19E-01 | 1.00E+00 | -0.14 | 6.73E-01 | 9.53E-01 |
| <b>DAZAP2</b>      | -0.01 | 9.55E-01 | 1.00E+00 | -0.13 | 6.73E-01 | 9.53E-01 |
| <b>PLEKHH2</b>     | -0.06 | 8.71E-01 | 1.00E+00 | -0.19 | 6.73E-01 | 9.53E-01 |
| <b>MACF1</b>       | -0.37 | 1.10E-01 | 1.00E+00 | 0.18  | 6.73E-01 | 9.53E-01 |
| <b>AKR1C1</b>      | 1.29  | 8.17E-02 | 1.00E+00 | -0.24 | 6.73E-01 | 9.53E-01 |
| <b>VCPIP1</b>      | -0.09 | 6.25E-01 | 1.00E+00 | 0.07  | 6.73E-01 | 9.53E-01 |
| <b>RPL14</b>       | -0.10 | 7.22E-01 | 1.00E+00 | 0.12  | 6.73E-01 | 9.53E-01 |
| <b>KIF2C</b>       | 0.22  | 4.49E-01 | 1.00E+00 | -0.23 | 6.73E-01 | 9.53E-01 |
| <b>CPOX</b>        | 0.17  | 4.72E-01 | 1.00E+00 | 0.23  | 6.73E-01 | 9.53E-01 |
| <b>CLK3</b>        | -0.05 | 7.44E-01 | 1.00E+00 | -0.09 | 6.73E-01 | 9.53E-01 |
| <b>RHBDD1</b>      | -0.19 | 2.96E-01 | 1.00E+00 | -0.08 | 6.73E-01 | 9.53E-01 |
| <b>XLOC_009135</b> | 0.71  | 4.95E-01 | 1.00E+00 | 0.36  | 6.73E-01 | 9.53E-01 |
| <b>PDXP</b>        | -0.13 | 7.94E-01 | 1.00E+00 | 0.49  | 6.73E-01 | 9.53E-01 |
| <b>SREK1</b>       | 0.16  | 5.31E-01 | 1.00E+00 | -0.09 | 6.73E-01 | 9.53E-01 |

|                   |       |          |          |       |          |          |
|-------------------|-------|----------|----------|-------|----------|----------|
| <b>AC087163.2</b> | -2.73 | 6.41E-02 | 1.00E+00 | 0.63  | 6.73E-01 | 9.53E-01 |
| <b>THUMPD1</b>    | 0.16  | 3.87E-01 | 1.00E+00 | -0.09 | 6.73E-01 | 9.53E-01 |
| <b>GPR88</b>      | 1.30  | 3.11E-01 | 1.00E+00 | 0.49  | 6.73E-01 | 9.53E-01 |
| <b>ALOX15</b>     | -0.57 | 1.25E-01 | 1.00E+00 | -0.34 | 6.73E-01 | 9.53E-01 |
| <b>POLE</b>       | -0.16 | 5.08E-01 | 1.00E+00 | 0.22  | 6.73E-01 | 9.53E-01 |
| <b>QARS</b>       | -0.27 | 3.80E-01 | 1.00E+00 | 0.08  | 6.73E-01 | 9.53E-01 |
| <b>BUD31</b>      | -0.09 | 6.52E-01 | 1.00E+00 | 0.14  | 6.74E-01 | 9.53E-01 |
| <b>BSCL2</b>      | 0.11  | 8.75E-01 | 1.00E+00 | 0.23  | 6.74E-01 | 9.53E-01 |
| <b>BID</b>        | -0.14 | 5.95E-01 | 1.00E+00 | 0.12  | 6.74E-01 | 9.53E-01 |
| <b>CORO2A</b>     | 0.35  | 3.37E-01 | 1.00E+00 | 0.13  | 6.74E-01 | 9.53E-01 |
| <b>Z97055.2</b>   | -0.46 | 6.79E-01 | 1.00E+00 | -0.45 | 6.74E-01 | 9.53E-01 |
| <b>SLC25A27</b>   | 0.31  | 6.10E-01 | 1.00E+00 | -0.35 | 6.74E-01 | 9.53E-01 |
| <b>MID1IP1</b>    | 0.23  | 2.86E-01 | 1.00E+00 | 0.18  | 6.74E-01 | 9.53E-01 |
| <b>RBSN</b>       | -0.18 | 4.62E-01 | 1.00E+00 | -0.09 | 6.74E-01 | 9.53E-01 |
| <b>METAP1</b>     | 0.07  | 7.07E-01 | 1.00E+00 | 0.08  | 6.74E-01 | 9.53E-01 |
| <b>SLC35E2B</b>   | 0.10  | 7.35E-01 | 1.00E+00 | 0.20  | 6.74E-01 | 9.53E-01 |
| <b>CBFA2T3</b>    | -0.13 | 7.16E-01 | 1.00E+00 | -0.18 | 6.74E-01 | 9.53E-01 |
| <b>CCDC115</b>    | 0.09  | 5.83E-01 | 1.00E+00 | -0.11 | 6.74E-01 | 9.53E-01 |
| <b>AP000785.2</b> | 0.48  | 6.52E-01 | 1.00E+00 | 0.40  | 6.74E-01 | 9.53E-01 |
| <b>MON2</b>       | 0.08  | 7.17E-01 | 1.00E+00 | -0.11 | 6.74E-01 | 9.53E-01 |
| <b>SH3BP4</b>     | -0.12 | 7.36E-01 | 1.00E+00 | -0.18 | 6.74E-01 | 9.53E-01 |
| <b>G15375</b>     | -0.48 | 3.20E-01 | 1.00E+00 | 0.37  | 6.74E-01 | 9.53E-01 |
| <b>PRKD1</b>      | 0.93  | 2.71E-02 | 9.60E-01 | -0.28 | 6.74E-01 | 9.53E-01 |
| <b>ENGASE</b>     | 0.14  | 6.19E-01 | 1.00E+00 | 0.29  | 6.74E-01 | 9.53E-01 |
| <b>ENO1</b>       | -0.24 | 2.80E-01 | 1.00E+00 | 0.10  | 6.75E-01 | 9.53E-01 |
| <b>LDHC</b>       | -1.66 | 1.67E-02 | 8.13E-01 | 0.42  | 6.75E-01 | 9.53E-01 |
| <b>HACD1</b>      | -0.51 | 2.82E-01 | 1.00E+00 | -0.18 | 6.75E-01 | 9.53E-01 |
| <b>RPL21P131</b>  | NA    | NA       | NA       | 0.43  | 6.75E-01 | 9.53E-01 |
| <b>ZNRF3</b>      | -0.17 | 6.30E-01 | 1.00E+00 | -0.14 | 6.75E-01 | 9.53E-01 |
| <b>DCLRE1A</b>    | 0.26  | 3.52E-01 | 1.00E+00 | 0.14  | 6.75E-01 | 9.53E-01 |
| <b>AC117382.1</b> | 1.05  | 3.89E-01 | 1.00E+00 | -0.19 | 6.75E-01 | 9.53E-01 |
| <b>LAMB4</b>      | 0.21  | 5.25E-01 | 1.00E+00 | -0.28 | 6.75E-01 | 9.53E-01 |

|             |       |          |          |       |          |          |
|-------------|-------|----------|----------|-------|----------|----------|
| ZFY         | 0.53  | 4.17E-01 | 1.00E+00 | -0.38 | 6.75E-01 | 9.53E-01 |
| UBE2Z       | -0.02 | 9.20E-01 | 1.00E+00 | 0.20  | 6.75E-01 | 9.53E-01 |
| AC139769.2  | -0.33 | 7.93E-01 | 1.00E+00 | -0.29 | 6.75E-01 | 9.53E-01 |
| IGKV1-13    | 1.78  | 5.77E-01 | 1.00E+00 | 1.35  | 6.75E-01 | 9.53E-01 |
| RPL18AP3    | -0.25 | 4.47E-01 | 1.00E+00 | 0.28  | 6.75E-01 | 9.53E-01 |
| ANKRD35     | 0.11  | 8.14E-01 | 1.00E+00 | 0.13  | 6.75E-01 | 9.53E-01 |
| PRPF4       | -0.11 | 5.66E-01 | 1.00E+00 | 0.07  | 6.75E-01 | 9.53E-01 |
| XLOC_003787 | -2.05 | 3.04E-01 | 1.00E+00 | 0.47  | 6.75E-01 | 9.53E-01 |
| ISYNA1      | -0.47 | 2.52E-01 | 1.00E+00 | -0.20 | 6.75E-01 | 9.53E-01 |
| CYP1B1-AS1  | -1.01 | 2.32E-01 | 1.00E+00 | -0.23 | 6.75E-01 | 9.53E-01 |
| ACSM5       | 1.59  | 1.43E-02 | 7.51E-01 | 0.25  | 6.75E-01 | 9.53E-01 |
| HPRT1       | -0.19 | 3.71E-01 | 1.00E+00 | -0.10 | 6.75E-01 | 9.54E-01 |
| AL162390.1  | 1.61  | 4.79E-01 | 1.00E+00 | 0.48  | 6.75E-01 | 9.54E-01 |
| IGHEP1      | -1.57 | 4.68E-01 | 1.00E+00 | -1.34 | 6.75E-01 | 9.54E-01 |
| ZBTB48      | -0.16 | 5.36E-01 | 1.00E+00 | 0.10  | 6.76E-01 | 9.54E-01 |
| BACH1-IT2   | -0.09 | 9.43E-01 | 1.00E+00 | -0.49 | 6.76E-01 | 9.54E-01 |
| FABP5P11    | -1.52 | 6.60E-01 | 1.00E+00 | 0.28  | 6.76E-01 | 9.54E-01 |
| LINC01978   | -1.00 | 5.86E-01 | 1.00E+00 | 0.79  | 6.76E-01 | 9.54E-01 |
| RPL14P3     | -0.47 | 8.70E-01 | 1.00E+00 | -0.37 | 6.76E-01 | 9.54E-01 |
| AC108693.1  | -0.09 | 9.68E-01 | 1.00E+00 | 0.41  | 6.76E-01 | 9.54E-01 |
| LINC02169   | -1.06 | 3.31E-01 | 1.00E+00 | -1.33 | 6.76E-01 | 9.54E-01 |
| GABBR2      | -1.26 | 6.67E-01 | 1.00E+00 | -0.39 | 6.76E-01 | 9.54E-01 |
| AC092611.3  | 0.75  | 2.01E-02 | 8.84E-01 | 0.22  | 6.76E-01 | 9.54E-01 |
| AC068025.1  | -2.08 | 2.53E-01 | 1.00E+00 | 0.40  | 6.76E-01 | 9.54E-01 |
| SNX31       | -0.19 | 8.28E-01 | 1.00E+00 | -0.42 | 6.76E-01 | 9.54E-01 |
| ATP5PFP1    | NA    | NA       | NA       | 0.40  | 6.76E-01 | 9.54E-01 |
| CASP17P     | -0.34 | 5.13E-01 | 1.00E+00 | -0.16 | 6.76E-01 | 9.54E-01 |
| G14979      | -1.22 | 5.87E-01 | 1.00E+00 | -0.49 | 6.76E-01 | 9.54E-01 |
| NOXA1       | -0.08 | 7.76E-01 | 1.00E+00 | 0.38  | 6.76E-01 | 9.54E-01 |
| LIX1        | -2.59 | 5.83E-02 | 1.00E+00 | 0.49  | 6.76E-01 | 9.54E-01 |
| ALG1L12P    | -2.23 | 7.92E-02 | 1.00E+00 | 0.28  | 6.76E-01 | 9.54E-01 |
| AKR1A1      | -0.20 | 3.59E-01 | 1.00E+00 | 0.08  | 6.77E-01 | 9.54E-01 |

|                      |       |          |          |       |          |          |
|----------------------|-------|----------|----------|-------|----------|----------|
| <b>AC005906.2</b>    | -2.30 | 2.35E-01 | 1.00E+00 | 0.57  | 6.77E-01 | 9.54E-01 |
| <b>ZNF251</b>        | -0.02 | 9.39E-01 | 1.00E+00 | 0.12  | 6.77E-01 | 9.54E-01 |
| <b>MT1F</b>          | -0.38 | 2.25E-01 | 1.00E+00 | -0.12 | 6.77E-01 | 9.54E-01 |
| <b>AC145676.1</b>    | -1.01 | 5.07E-01 | 1.00E+00 | 0.81  | 6.77E-01 | 9.54E-01 |
| <b>UTP25</b>         | 0.00  | 9.85E-01 | 1.00E+00 | -0.07 | 6.77E-01 | 9.54E-01 |
| <b>PLA2G2D</b>       | -1.30 | 3.28E-01 | 1.00E+00 | 1.32  | 6.77E-01 | 9.54E-01 |
| <b>COG7</b>          | 0.13  | 5.48E-01 | 1.00E+00 | -0.07 | 6.77E-01 | 9.54E-01 |
| <b>CENPF</b>         | -0.36 | 2.02E-01 | 1.00E+00 | 0.18  | 6.77E-01 | 9.54E-01 |
| <b>SVIL-AS1</b>      | 0.39  | 5.83E-02 | 1.00E+00 | -0.10 | 6.77E-01 | 9.54E-01 |
| <b>FMN2</b>          | -0.51 | 5.07E-01 | 1.00E+00 | -0.41 | 6.77E-01 | 9.54E-01 |
| <b>EYS</b>           | 1.31  | 1.70E-01 | 1.00E+00 | -0.61 | 6.77E-01 | 9.54E-01 |
| <b>AC067838.1</b>    | 0.14  | 8.30E-01 | 1.00E+00 | 0.22  | 6.77E-01 | 9.54E-01 |
| <b>DUSP13</b>        | -0.28 | 5.79E-01 | 1.00E+00 | -0.31 | 6.77E-01 | 9.54E-01 |
| <b>CLC</b>           | 1.49  | 5.13E-01 | 1.00E+00 | 0.75  | 6.77E-01 | 9.54E-01 |
| <b>BORA</b>          | -0.35 | 4.06E-01 | 1.00E+00 | 0.15  | 6.77E-01 | 9.54E-01 |
| <b>A1BG-AS1</b>      | -1.49 | 9.63E-02 | 1.00E+00 | 0.38  | 6.77E-01 | 9.54E-01 |
| <b>RP11-680G24.5</b> | 0.82  | 5.08E-01 | 1.00E+00 | -0.30 | 6.77E-01 | 9.54E-01 |
| <b>ANKMY2</b>        | 0.00  | 9.91E-01 | 1.00E+00 | -0.11 | 6.77E-01 | 9.54E-01 |
| <b>AC023632.6</b>    | 0.43  | 4.01E-01 | 1.00E+00 | 0.27  | 6.77E-01 | 9.54E-01 |
| <b>TOMM7</b>         | 0.06  | 8.51E-01 | 1.00E+00 | -0.09 | 6.77E-01 | 9.54E-01 |
| <b>SOX2</b>          | -0.66 | 3.52E-01 | 1.00E+00 | 0.35  | 6.78E-01 | 9.54E-01 |
| <b>G33207</b>        | -0.16 | 7.89E-01 | 1.00E+00 | -0.33 | 6.78E-01 | 9.54E-01 |
| <b>PRCD</b>          | -0.11 | 8.13E-01 | 1.00E+00 | 0.22  | 6.78E-01 | 9.55E-01 |
| <b>ACACB</b>         | 1.78  | 1.75E-02 | 8.33E-01 | 0.29  | 6.78E-01 | 9.55E-01 |
| <b>HNRNPU</b>        | -0.23 | 6.53E-02 | 1.00E+00 | -0.17 | 6.78E-01 | 9.55E-01 |
| <b>SLC16A5</b>       | 0.04  | 9.22E-01 | 1.00E+00 | -0.12 | 6.78E-01 | 9.55E-01 |
| <b>AC009090.1</b>    | 2.72  | 1.85E-02 | 8.53E-01 | 0.44  | 6.78E-01 | 9.55E-01 |
| <b>AC109635.4</b>    | 2.74  | 4.20E-01 | 1.00E+00 | 0.62  | 6.78E-01 | 9.55E-01 |
| <b>RP11-640M9.1</b>  | 0.31  | 3.97E-01 | 1.00E+00 | 0.10  | 6.78E-01 | 9.55E-01 |
| <b>CLGN</b>          | 0.12  | 9.05E-01 | 1.00E+00 | -0.29 | 6.78E-01 | 9.55E-01 |
| <b>SERINC5</b>       | 0.10  | 7.31E-01 | 1.00E+00 | 0.15  | 6.78E-01 | 9.55E-01 |
| <b>NT5C</b>          | -0.05 | 8.63E-01 | 1.00E+00 | -0.10 | 6.78E-01 | 9.55E-01 |

|                    |       |          |          |       |          |          |
|--------------------|-------|----------|----------|-------|----------|----------|
| <b>RPL7AP14</b>    | NA    | NA       | NA       | 0.55  | 6.78E-01 | 9.55E-01 |
| <b>C9orf43</b>     | 0.04  | 9.53E-01 | 1.00E+00 | -0.29 | 6.78E-01 | 9.55E-01 |
| <b>SLC12A4</b>     | 0.18  | 5.68E-01 | 1.00E+00 | 0.20  | 6.79E-01 | 9.55E-01 |
| <b>DBR1</b>        | 0.06  | 7.21E-01 | 1.00E+00 | 0.07  | 6.79E-01 | 9.55E-01 |
| <b>SGK3</b>        | 0.33  | 3.23E-01 | 1.00E+00 | -0.13 | 6.79E-01 | 9.55E-01 |
| <b>AC110285.7</b>  | -0.22 | 7.22E-01 | 1.00E+00 | 0.35  | 6.79E-01 | 9.55E-01 |
| <b>RPS27L</b>      | 0.20  | 3.73E-01 | 1.00E+00 | -0.14 | 6.79E-01 | 9.55E-01 |
| <b>CSKMT</b>       | 0.06  | 8.99E-01 | 1.00E+00 | -0.23 | 6.79E-01 | 9.55E-01 |
| <b>TMED10</b>      | 0.24  | 8.83E-02 | 1.00E+00 | -0.09 | 6.79E-01 | 9.55E-01 |
| <b>UBN2</b>        | 0.16  | 6.14E-01 | 1.00E+00 | -0.16 | 6.79E-01 | 9.55E-01 |
| <b>AC078923.1</b>  | -1.40 | 4.49E-01 | 1.00E+00 | 0.44  | 6.79E-01 | 9.55E-01 |
| <b>CNTN4</b>       | 0.15  | 8.14E-01 | 1.00E+00 | 0.25  | 6.79E-01 | 9.55E-01 |
| <b>IGF1</b>        | 0.46  | 5.32E-01 | 1.00E+00 | 0.23  | 6.79E-01 | 9.55E-01 |
| <b>FAM124B</b>     | 0.80  | 2.07E-02 | 8.94E-01 | -0.19 | 6.79E-01 | 9.55E-01 |
| <b>PANK3</b>       | 0.14  | 5.66E-01 | 1.00E+00 | 0.08  | 6.79E-01 | 9.55E-01 |
| <b>ANKRD17</b>     | -0.17 | 3.72E-01 | 1.00E+00 | 0.11  | 6.79E-01 | 9.55E-01 |
| <b>NEO1</b>        | 0.24  | 3.28E-01 | 1.00E+00 | 0.17  | 6.79E-01 | 9.55E-01 |
| <b>AL139220.2</b>  | 0.14  | 8.24E-01 | 1.00E+00 | -0.21 | 6.79E-01 | 9.55E-01 |
| <b>IGKV1D-43</b>   | NA    | NA       | NA       | 1.33  | 6.79E-01 | 9.55E-01 |
| <b>ATF7IP</b>      | -0.08 | 7.62E-01 | 1.00E+00 | -0.09 | 6.79E-01 | 9.55E-01 |
| <b>LRRC10B</b>     | -0.35 | 4.02E-01 | 1.00E+00 | -0.42 | 6.79E-01 | 9.55E-01 |
| <b>ARSG</b>        | -0.58 | 9.68E-02 | 1.00E+00 | -0.09 | 6.80E-01 | 9.55E-01 |
| <b>DNAJA1</b>      | -0.08 | 7.94E-01 | 1.00E+00 | 0.12  | 6.80E-01 | 9.55E-01 |
| <b>AC027801.1</b>  | -0.35 | 8.16E-01 | 1.00E+00 | 0.38  | 6.80E-01 | 9.55E-01 |
| <b>GRAMD1C</b>     | 0.29  | 5.40E-01 | 1.00E+00 | 0.15  | 6.80E-01 | 9.55E-01 |
| <b>AC010980.1</b>  | 0.38  | 5.71E-01 | 1.00E+00 | 0.27  | 6.80E-01 | 9.55E-01 |
| <b>XLOC_005479</b> | 3.27  | 1.84E-01 | 1.00E+00 | -0.30 | 6.80E-01 | 9.55E-01 |
| <b>PRND</b>        | 0.03  | 9.76E-01 | 1.00E+00 | 0.45  | 6.80E-01 | 9.55E-01 |
| <b>AL591866.1</b>  | -0.65 | 8.31E-01 | 1.00E+00 | 0.25  | 6.80E-01 | 9.55E-01 |
| <b>EIF1B-AS1</b>   | 0.37  | 4.13E-01 | 1.00E+00 | -0.18 | 6.80E-01 | 9.55E-01 |
| <b>ZNF678</b>      | 0.08  | 8.28E-01 | 1.00E+00 | 0.14  | 6.80E-01 | 9.55E-01 |
| <b>TSPYL4</b>      | -0.40 | 8.20E-02 | 1.00E+00 | 0.12  | 6.80E-01 | 9.55E-01 |

|                   |       |          |          |       |          |          |
|-------------------|-------|----------|----------|-------|----------|----------|
| <b>AC090181.2</b> | -1.70 | 3.01E-01 | 1.00E+00 | -0.67 | 6.80E-01 | 9.55E-01 |
| <b>PKNOX2</b>     | -0.70 | 3.13E-02 | 1.00E+00 | 0.23  | 6.80E-01 | 9.55E-01 |
| <b>RPP38</b>      | 0.04  | 8.87E-01 | 1.00E+00 | -0.15 | 6.80E-01 | 9.55E-01 |
| <b>C19orf48</b>   | -0.31 | 2.40E-01 | 1.00E+00 | 0.15  | 6.80E-01 | 9.55E-01 |
| <b>RLIMP1</b>     | -1.70 | 6.01E-01 | 1.00E+00 | 0.48  | 6.80E-01 | 9.55E-01 |
| <b>AC069155.1</b> | -1.77 | 2.53E-01 | 1.00E+00 | 0.43  | 6.80E-01 | 9.55E-01 |
| <b>RPUSD2</b>     | -0.07 | 7.59E-01 | 1.00E+00 | 0.09  | 6.80E-01 | 9.55E-01 |
| <b>AP1M2</b>      | -0.05 | 8.63E-01 | 1.00E+00 | -0.17 | 6.80E-01 | 9.55E-01 |
| <b>NUS1P1</b>     | -0.09 | 9.32E-01 | 1.00E+00 | 0.24  | 6.80E-01 | 9.55E-01 |
| <b>SLC2A5</b>     | 0.14  | 8.11E-01 | 1.00E+00 | 0.26  | 6.80E-01 | 9.55E-01 |
| <b>TTC23</b>      | 0.38  | 1.96E-01 | 1.00E+00 | 0.10  | 6.80E-01 | 9.55E-01 |
| <b>PTRH2</b>      | 0.06  | 7.79E-01 | 1.00E+00 | 0.10  | 6.81E-01 | 9.56E-01 |
| <b>AL135744.1</b> | -2.99 | 2.53E-01 | 1.00E+00 | 0.35  | 6.81E-01 | 9.56E-01 |
| <b>POC1B</b>      | 0.21  | 3.34E-01 | 1.00E+00 | -0.11 | 6.81E-01 | 9.56E-01 |
| <b>G29144</b>     | -0.78 | 6.49E-01 | 1.00E+00 | -0.47 | 6.81E-01 | 9.56E-01 |
| <b>SPATA2L</b>    | -0.16 | 5.41E-01 | 1.00E+00 | 0.21  | 6.81E-01 | 9.56E-01 |
| <b>AFG1L</b>      | 0.07  | 8.54E-01 | 1.00E+00 | 0.11  | 6.81E-01 | 9.56E-01 |
| <b>ITGA9</b>      | 0.24  | 5.36E-01 | 1.00E+00 | 0.20  | 6.81E-01 | 9.56E-01 |
| <b>FRG1-DT</b>    | 1.04  | 2.72E-01 | 1.00E+00 | -0.32 | 6.81E-01 | 9.56E-01 |
| <b>AL132712.1</b> | -0.65 | 3.77E-01 | 1.00E+00 | -0.40 | 6.81E-01 | 9.56E-01 |
| <b>HIGD1AP14</b>  | NA    | NA       | NA       | -0.31 | 6.81E-01 | 9.56E-01 |
| <b>PSMD5</b>      | 0.16  | 3.86E-01 | 1.00E+00 | -0.08 | 6.81E-01 | 9.56E-01 |
| <b>AL392046.2</b> | -0.14 | 7.56E-01 | 1.00E+00 | 0.24  | 6.81E-01 | 9.56E-01 |
| <b>C5</b>         | -0.01 | 9.75E-01 | 1.00E+00 | -0.26 | 6.81E-01 | 9.56E-01 |
| <b>GDF10</b>      | 0.58  | 4.49E-01 | 1.00E+00 | -0.31 | 6.81E-01 | 9.56E-01 |
| <b>NDUFA9</b>     | -0.08 | 8.05E-01 | 1.00E+00 | -0.20 | 6.81E-01 | 9.56E-01 |
| <b>ARL13B</b>     | 0.24  | 4.38E-01 | 1.00E+00 | -0.10 | 6.81E-01 | 9.56E-01 |
| <b>TSPAN17</b>    | -0.25 | 2.80E-01 | 1.00E+00 | 0.21  | 6.81E-01 | 9.56E-01 |
| <b>AC004067.1</b> | -0.89 | 2.58E-01 | 1.00E+00 | 0.25  | 6.82E-01 | 9.56E-01 |
| <b>PPT1</b>       | -0.02 | 9.13E-01 | 1.00E+00 | 0.09  | 6.82E-01 | 9.56E-01 |
| <b>COL6A5</b>     | 0.39  | 5.61E-01 | 1.00E+00 | 0.38  | 6.82E-01 | 9.56E-01 |
| <b>AF274858.1</b> | 0.08  | 9.05E-01 | 1.00E+00 | -0.16 | 6.82E-01 | 9.56E-01 |

|                    |       |          |          |       |          |          |
|--------------------|-------|----------|----------|-------|----------|----------|
| <b>RBMX</b>        | -0.09 | 5.47E-01 | 1.00E+00 | -0.07 | 6.82E-01 | 9.56E-01 |
| <b>XRN1</b>        | 0.23  | 4.70E-01 | 1.00E+00 | 0.11  | 6.82E-01 | 9.56E-01 |
| <b>SCART1</b>      | -0.73 | 3.88E-01 | 1.00E+00 | -0.31 | 6.82E-01 | 9.56E-01 |
| <b>PITX2</b>       | -0.04 | 9.65E-01 | 1.00E+00 | 0.31  | 6.82E-01 | 9.56E-01 |
| <b>VMAC</b>        | -0.40 | 2.07E-01 | 1.00E+00 | -0.11 | 6.82E-01 | 9.56E-01 |
| <b>AC034102.1</b>  | 0.52  | 6.92E-01 | 1.00E+00 | 0.18  | 6.82E-01 | 9.56E-01 |
| <b>Z97353.1</b>    | -2.23 | 5.12E-01 | 1.00E+00 | 0.32  | 6.82E-01 | 9.56E-01 |
| <b>LYRM4</b>       | 0.01  | 9.72E-01 | 1.00E+00 | 0.08  | 6.82E-01 | 9.56E-01 |
| <b>ADAMTS14</b>    | -0.61 | 3.29E-01 | 1.00E+00 | 1.29  | 6.82E-01 | 9.56E-01 |
| <b>MTMR6</b>       | 0.36  | 8.54E-02 | 1.00E+00 | -0.12 | 6.82E-01 | 9.56E-01 |
| <b>GPS2P1</b>      | 1.50  | 6.62E-01 | 1.00E+00 | -0.45 | 6.82E-01 | 9.56E-01 |
| <b>XLOC_014219</b> | -0.34 | 7.26E-01 | 1.00E+00 | -0.66 | 6.82E-01 | 9.56E-01 |
| <b>CLUH</b>        | -0.28 | 3.01E-01 | 1.00E+00 | -0.25 | 6.82E-01 | 9.56E-01 |
| <b>IGHEP2</b>      | -1.57 | 4.23E-01 | 1.00E+00 | -0.52 | 6.82E-01 | 9.56E-01 |
| <b>AC079145.1</b>  | -0.44 | 8.90E-01 | 1.00E+00 | 0.52  | 6.83E-01 | 9.56E-01 |
| <b>IL31RA</b>      | -0.04 | 9.65E-01 | 1.00E+00 | -0.42 | 6.83E-01 | 9.56E-01 |
| <b>SYNGR3</b>      | -1.59 | 8.23E-02 | 1.00E+00 | -0.33 | 6.83E-01 | 9.56E-01 |
| <b>CREB3</b>       | 0.05  | 8.80E-01 | 1.00E+00 | 0.09  | 6.83E-01 | 9.56E-01 |
| <b>AC026803.2</b>  | -0.28 | 5.89E-01 | 1.00E+00 | -0.46 | 6.83E-01 | 9.56E-01 |
| <b>XLOC_006088</b> | -2.72 | 3.34E-01 | 1.00E+00 | 0.55  | 6.83E-01 | 9.56E-01 |
| <b>AC135048.3</b>  | -2.00 | 1.85E-01 | 1.00E+00 | 0.39  | 6.83E-01 | 9.56E-01 |
| <b>GJC2</b>        | -0.07 | 8.41E-01 | 1.00E+00 | 0.32  | 6.83E-01 | 9.56E-01 |
| <b>EEF1AKMT1</b>   | 0.04  | 8.89E-01 | 1.00E+00 | -0.15 | 6.83E-01 | 9.56E-01 |
| <b>AC004490.1</b>  | 0.83  | 4.44E-01 | 1.00E+00 | 0.36  | 6.83E-01 | 9.56E-01 |
| <b>G16011</b>      | -0.72 | 6.17E-01 | 1.00E+00 | 0.44  | 6.83E-01 | 9.56E-01 |
| <b>CPNE6</b>       | -1.57 | 1.71E-01 | 1.00E+00 | -0.35 | 6.83E-01 | 9.56E-01 |
| <b>DSC1</b>        | 0.09  | 8.69E-01 | 1.00E+00 | 0.28  | 6.83E-01 | 9.56E-01 |
| <b>DDX31</b>       | -0.02 | 9.43E-01 | 1.00E+00 | 0.17  | 6.83E-01 | 9.56E-01 |
| <b>SEMA6A-AS1</b>  | 1.26  | 3.91E-01 | 1.00E+00 | 0.43  | 6.83E-01 | 9.56E-01 |
| <b>LRRC45</b>      | -0.26 | 3.63E-01 | 1.00E+00 | 0.23  | 6.83E-01 | 9.56E-01 |
| <b>MNS1</b>        | -0.17 | 6.63E-01 | 1.00E+00 | -0.14 | 6.83E-01 | 9.56E-01 |
| <b>ADAMTS4</b>     | -2.06 | 9.13E-02 | 1.00E+00 | 0.38  | 6.83E-01 | 9.56E-01 |



|             |       |          |          |       |          |          |
|-------------|-------|----------|----------|-------|----------|----------|
| VIPR2       | 0.02  | 9.80E-01 | 1.00E+00 | 0.43  | 6.83E-01 | 9.56E-01 |
| CPLX1       | -1.15 | 1.20E-01 | 1.00E+00 | 0.46  | 6.83E-01 | 9.56E-01 |
| TRIB1       | -0.27 | 4.37E-01 | 1.00E+00 | -0.23 | 6.83E-01 | 9.56E-01 |
| CLIP1       | -0.28 | 3.39E-01 | 1.00E+00 | -0.09 | 6.83E-01 | 9.56E-01 |
| FAM156B     | 0.52  | 2.74E-01 | 1.00E+00 | 0.13  | 6.83E-01 | 9.56E-01 |
| USP2-AS1    | -0.16 | 9.09E-01 | 1.00E+00 | -0.35 | 6.83E-01 | 9.56E-01 |
| DAP3        | 0.05  | 7.91E-01 | 1.00E+00 | 0.06  | 6.83E-01 | 9.56E-01 |
| ZFR2        | -2.88 | 3.04E-02 | 1.00E+00 | -0.40 | 6.83E-01 | 9.56E-01 |
| AL139287.1  | -0.75 | 4.53E-01 | 1.00E+00 | 0.36  | 6.83E-01 | 9.56E-01 |
| VWA1        | -0.31 | 3.72E-01 | 1.00E+00 | 0.33  | 6.84E-01 | 9.56E-01 |
| LINC01135   | -0.64 | 4.88E-01 | 1.00E+00 | -0.33 | 6.84E-01 | 9.56E-01 |
| TMEM30A     | 0.20  | 4.60E-01 | 1.00E+00 | 0.11  | 6.84E-01 | 9.56E-01 |
| SCAF8       | -0.35 | 1.47E-01 | 1.00E+00 | 0.12  | 6.84E-01 | 9.56E-01 |
| STYK1       | -1.34 | 1.17E-02 | 6.70E-01 | -0.32 | 6.84E-01 | 9.56E-01 |
| BTC         | 0.18  | 7.79E-01 | 1.00E+00 | -0.27 | 6.84E-01 | 9.56E-01 |
| C9orf38     | 1.04  | 5.21E-01 | 1.00E+00 | 0.35  | 6.84E-01 | 9.56E-01 |
| CCND2       | 0.45  | 2.38E-01 | 1.00E+00 | -0.13 | 6.84E-01 | 9.56E-01 |
| SOX7        | -0.54 | 1.13E-02 | 6.59E-01 | -0.16 | 6.84E-01 | 9.56E-01 |
| ABCC11      | -0.03 | 9.78E-01 | 1.00E+00 | -0.39 | 6.84E-01 | 9.56E-01 |
| XLOC_002997 | 1.14  | 6.01E-01 | 1.00E+00 | 0.61  | 6.84E-01 | 9.56E-01 |
| ALG3        | -0.51 | 3.90E-02 | 1.00E+00 | 0.08  | 6.84E-01 | 9.56E-01 |
| PHYHIPL     | -0.83 | 4.31E-01 | 1.00E+00 | -0.32 | 6.84E-01 | 9.56E-01 |
| AC005776.2  | 0.04  | 9.68E-01 | 1.00E+00 | 0.47  | 6.84E-01 | 9.56E-01 |
| MCTP2       | 0.06  | 8.54E-01 | 1.00E+00 | 0.21  | 6.84E-01 | 9.56E-01 |
| SPDYA       | -1.94 | 2.89E-01 | 1.00E+00 | 0.26  | 6.84E-01 | 9.56E-01 |
| CCKBR       | -1.34 | 1.47E-02 | 7.60E-01 | -0.35 | 6.84E-01 | 9.56E-01 |
| ZNF724      | 0.48  | 5.09E-01 | 1.00E+00 | -0.23 | 6.84E-01 | 9.56E-01 |
| AC090970.1  | 1.55  | 4.69E-01 | 1.00E+00 | 0.35  | 6.84E-01 | 9.56E-01 |
| ICK         | 0.03  | 9.01E-01 | 1.00E+00 | 0.09  | 6.84E-01 | 9.56E-01 |
| RPL3P9      | NA    | NA       | NA       | -0.34 | 6.84E-01 | 9.56E-01 |
| AL391244.1  | -0.14 | 5.85E-01 | 1.00E+00 | 0.11  | 6.84E-01 | 9.56E-01 |
| MTREX       | 0.13  | 5.62E-01 | 1.00E+00 | -0.08 | 6.85E-01 | 9.56E-01 |

|                    |       |          |          |       |          |          |
|--------------------|-------|----------|----------|-------|----------|----------|
| <b>AP000811.1</b>  | 0.25  | 9.10E-01 | 1.00E+00 | 0.47  | 6.85E-01 | 9.56E-01 |
| <b>NOL6</b>        | -0.26 | 3.17E-01 | 1.00E+00 | 0.22  | 6.85E-01 | 9.56E-01 |
| <b>RASA3</b>       | 0.48  | 1.38E-01 | 1.00E+00 | 0.23  | 6.85E-01 | 9.57E-01 |
| <b>AC123912.1</b>  | 1.47  | 1.76E-01 | 1.00E+00 | -0.30 | 6.85E-01 | 9.57E-01 |
| <b>PDE1B</b>       | 0.48  | 4.14E-01 | 1.00E+00 | 0.34  | 6.85E-01 | 9.57E-01 |
| <b>MYO1A</b>       | -3.09 | 2.29E-02 | 9.12E-01 | -0.39 | 6.85E-01 | 9.57E-01 |
| <b>DYNC2LI1</b>    | 0.31  | 2.18E-01 | 1.00E+00 | -0.14 | 6.85E-01 | 9.57E-01 |
| <b>GRPR</b>        | 0.80  | 6.50E-01 | 1.00E+00 | -0.61 | 6.85E-01 | 9.57E-01 |
| <b>TREM2</b>       | -0.60 | 3.64E-01 | 1.00E+00 | 0.44  | 6.85E-01 | 9.57E-01 |
| <b>UBFD1</b>       | 0.24  | 2.82E-01 | 1.00E+00 | 0.21  | 6.85E-01 | 9.57E-01 |
| <b>PTPDC1</b>      | 0.13  | 7.20E-01 | 1.00E+00 | -0.24 | 6.85E-01 | 9.57E-01 |
| <b>ANP32BP1</b>    | -0.55 | 8.75E-01 | 1.00E+00 | -0.29 | 6.85E-01 | 9.57E-01 |
| <b>TPO</b>         | 0.48  | 5.03E-01 | 1.00E+00 | -0.31 | 6.85E-01 | 9.57E-01 |
| <b>C4orf3</b>      | 0.13  | 3.68E-01 | 1.00E+00 | -0.12 | 6.85E-01 | 9.57E-01 |
| <b>FBXW11</b>      | 0.23  | 2.34E-01 | 1.00E+00 | 0.10  | 6.85E-01 | 9.57E-01 |
| <b>POLB</b>        | -0.01 | 9.64E-01 | 1.00E+00 | 0.12  | 6.85E-01 | 9.57E-01 |
| <b>KCNE1</b>       | -2.59 | 5.32E-02 | 1.00E+00 | -0.52 | 6.85E-01 | 9.57E-01 |
| <b>TMEM108-AS1</b> | 0.43  | 9.03E-01 | 1.00E+00 | -0.75 | 6.85E-01 | 9.57E-01 |
| <b>MYOM2</b>       | 0.29  | 2.76E-01 | 1.00E+00 | -0.12 | 6.85E-01 | 9.57E-01 |
| <b>AC092573.2</b>  | 0.05  | 9.76E-01 | 1.00E+00 | 0.51  | 6.85E-01 | 9.57E-01 |
| <b>AC109587.1</b>  | 0.48  | 4.47E-01 | 1.00E+00 | -0.30 | 6.85E-01 | 9.57E-01 |
| <b>PDLIM1P4</b>    | -0.81 | 6.00E-01 | 1.00E+00 | 0.25  | 6.85E-01 | 9.57E-01 |
| <b>ST6GALNAC1</b>  | -0.39 | 5.32E-01 | 1.00E+00 | 0.25  | 6.85E-01 | 9.57E-01 |
| <b>AC091057.1</b>  | 0.46  | 4.06E-01 | 1.00E+00 | 0.39  | 6.85E-01 | 9.57E-01 |
| <b>CLIP4</b>       | 0.22  | 3.57E-01 | 1.00E+00 | -0.09 | 6.86E-01 | 9.57E-01 |
| <b>NPNT</b>        | -0.15 | 6.70E-01 | 1.00E+00 | -0.20 | 6.86E-01 | 9.57E-01 |
| <b>MED10</b>       | 0.14  | 5.00E-01 | 1.00E+00 | -0.10 | 6.86E-01 | 9.57E-01 |
| <b>RNPS1</b>       | -0.04 | 8.27E-01 | 1.00E+00 | -0.07 | 6.86E-01 | 9.57E-01 |
| <b>GLYR1</b>       | -0.06 | 7.36E-01 | 1.00E+00 | 0.18  | 6.86E-01 | 9.57E-01 |
| <b>G40907</b>      | -0.04 | 9.76E-01 | 1.00E+00 | -0.37 | 6.86E-01 | 9.57E-01 |
| <b>DDX11-AS1</b>   | -1.69 | 1.54E-01 | 1.00E+00 | 0.43  | 6.86E-01 | 9.57E-01 |
| <b>PNPLA8</b>      | 0.15  | 5.23E-01 | 1.00E+00 | -0.09 | 6.86E-01 | 9.57E-01 |

|                   |       |          |          |       |          |          |
|-------------------|-------|----------|----------|-------|----------|----------|
| <b>C15orf62</b>   | 0.34  | 5.02E-01 | 1.00E+00 | -0.26 | 6.86E-01 | 9.57E-01 |
| <b>KCNJ2</b>      | 0.02  | 9.54E-01 | 1.00E+00 | -0.16 | 6.86E-01 | 9.57E-01 |
| <b>PRR4</b>       | -1.64 | 6.28E-01 | 1.00E+00 | -1.27 | 6.86E-01 | 9.57E-01 |
| <b>RPL13</b>      | -0.17 | 5.55E-01 | 1.00E+00 | 0.12  | 6.86E-01 | 9.57E-01 |
| <b>MFSD6L</b>     | 0.13  | 8.11E-01 | 1.00E+00 | 0.98  | 6.86E-01 | 9.57E-01 |
| <b>GTF2H2C</b>    | -0.17 | 6.29E-01 | 1.00E+00 | -0.12 | 6.86E-01 | 9.57E-01 |
| <b>AL117339.5</b> | 0.56  | 8.57E-01 | 1.00E+00 | -1.27 | 6.86E-01 | 9.57E-01 |
| <b>TMEM19</b>     | 0.29  | 2.50E-01 | 1.00E+00 | -0.14 | 6.86E-01 | 9.57E-01 |
| <b>AC021188.1</b> | -0.08 | 9.00E-01 | 1.00E+00 | -0.33 | 6.86E-01 | 9.57E-01 |
| <b>AC018752.1</b> | -2.07 | 1.01E-01 | 1.00E+00 | -0.34 | 6.86E-01 | 9.57E-01 |
| <b>SHANK2</b>     | -0.07 | 9.29E-01 | 1.00E+00 | 0.30  | 6.86E-01 | 9.57E-01 |
| <b>ZNF587</b>     | -0.11 | 7.52E-01 | 1.00E+00 | 0.13  | 6.86E-01 | 9.57E-01 |
| <b>AC096540.1</b> | 1.65  | 2.74E-01 | 1.00E+00 | -0.37 | 6.86E-01 | 9.57E-01 |
| <b>AC087276.1</b> | 0.58  | 4.23E-01 | 1.00E+00 | 0.27  | 6.86E-01 | 9.57E-01 |
| <b>CCDC116</b>    | -2.64 | 1.62E-01 | 1.00E+00 | 0.56  | 6.87E-01 | 9.57E-01 |
| <b>PRRG4</b>      | 0.25  | 5.28E-01 | 1.00E+00 | -0.17 | 6.87E-01 | 9.57E-01 |
| <b>ZNF141</b>     | -0.35 | 3.74E-01 | 1.00E+00 | -0.17 | 6.87E-01 | 9.57E-01 |
| <b>CNOT1</b>      | 0.22  | 3.10E-01 | 1.00E+00 | 0.14  | 6.87E-01 | 9.57E-01 |
| <b>EPS8L2</b>     | -0.32 | 3.88E-01 | 1.00E+00 | 0.18  | 6.87E-01 | 9.57E-01 |
| <b>FAM86DP</b>    | 0.10  | 7.17E-01 | 1.00E+00 | 0.11  | 6.87E-01 | 9.57E-01 |
| <b>LINC01311</b>  | -2.26 | 5.00E-02 | 1.00E+00 | -0.39 | 6.87E-01 | 9.57E-01 |
| <b>AL135818.2</b> | -0.35 | 7.81E-01 | 1.00E+00 | 0.64  | 6.87E-01 | 9.57E-01 |
| <b>C1orf21</b>    | 0.02  | 9.46E-01 | 1.00E+00 | -0.11 | 6.87E-01 | 9.57E-01 |
| <b>CTNBL1</b>     | 0.00  | 9.90E-01 | 1.00E+00 | 0.05  | 6.87E-01 | 9.57E-01 |
| <b>AL121944.1</b> | 0.34  | 5.43E-01 | 1.00E+00 | -0.17 | 6.87E-01 | 9.57E-01 |
| <b>ZDHHC11B</b>   | -0.23 | 7.42E-01 | 1.00E+00 | 0.31  | 6.87E-01 | 9.57E-01 |
| <b>AP001148.1</b> | -1.02 | 4.38E-01 | 1.00E+00 | 0.45  | 6.87E-01 | 9.57E-01 |
| <b>AC011477.2</b> | -0.43 | 5.21E-01 | 1.00E+00 | -0.18 | 6.87E-01 | 9.57E-01 |
| <b>SLC7A3</b>     | 0.54  | 7.31E-01 | 1.00E+00 | -0.84 | 6.87E-01 | 9.57E-01 |
| <b>ARHGAP39</b>   | -0.52 | 1.07E-01 | 1.00E+00 | 0.31  | 6.87E-01 | 9.57E-01 |
| <b>UFD1</b>       | -0.12 | 4.91E-01 | 1.00E+00 | -0.09 | 6.87E-01 | 9.57E-01 |
| <b>FN3K</b>       | 0.03  | 9.55E-01 | 1.00E+00 | 0.29  | 6.87E-01 | 9.57E-01 |

|               |       |          |          |       |          |          |
|---------------|-------|----------|----------|-------|----------|----------|
| KIF21B        | -0.14 | 8.22E-01 | 1.00E+00 | 1.27  | 6.87E-01 | 9.57E-01 |
| DNAH11        | 0.38  | 4.49E-01 | 1.00E+00 | -0.33 | 6.88E-01 | 9.57E-01 |
| MED22         | 0.14  | 5.91E-01 | 1.00E+00 | 0.27  | 6.88E-01 | 9.57E-01 |
| EIF2AK3       | 0.33  | 1.72E-01 | 1.00E+00 | -0.20 | 6.88E-01 | 9.57E-01 |
| AC125232.2    | -0.34 | 4.99E-01 | 1.00E+00 | 0.36  | 6.88E-01 | 9.57E-01 |
| AC096745.2    | 0.07  | 9.49E-01 | 1.00E+00 | -0.38 | 6.88E-01 | 9.57E-01 |
| MYLK3         | -0.57 | 6.71E-01 | 1.00E+00 | 0.64  | 6.88E-01 | 9.57E-01 |
| DMPK          | -0.40 | 3.91E-01 | 1.00E+00 | -0.33 | 6.88E-01 | 9.57E-01 |
| AC090912.2    | -2.93 | 1.87E-01 | 1.00E+00 | -0.44 | 6.88E-01 | 9.57E-01 |
| WI2-1896O14.1 | 0.02  | 9.74E-01 | 1.00E+00 | -0.21 | 6.88E-01 | 9.57E-01 |
| AOC3          | 0.92  | 2.18E-01 | 1.00E+00 | -0.29 | 6.88E-01 | 9.57E-01 |
| G32346        | -2.19 | 2.32E-01 | 1.00E+00 | -1.28 | 6.88E-01 | 9.57E-01 |
| PCDHB5        | -0.21 | 7.69E-01 | 1.00E+00 | -0.27 | 6.88E-01 | 9.57E-01 |
| AL021578.1    | -1.86 | 6.40E-02 | 1.00E+00 | -0.66 | 6.88E-01 | 9.57E-01 |
| ASF1B         | -0.28 | 3.53E-01 | 1.00E+00 | 0.16  | 6.88E-01 | 9.57E-01 |
| PWP1          | -0.14 | 4.63E-01 | 1.00E+00 | -0.06 | 6.88E-01 | 9.57E-01 |
| IL21-AS1      | NA    | NA       | NA       | 0.98  | 6.88E-01 | 9.57E-01 |
| PTP4A2P1      | 1.09  | 5.64E-01 | 1.00E+00 | -0.31 | 6.88E-01 | 9.57E-01 |
| ASB2          | -0.07 | 8.99E-01 | 1.00E+00 | 0.25  | 6.88E-01 | 9.57E-01 |
| AC113191.1    | 0.09  | 9.20E-01 | 1.00E+00 | 0.25  | 6.88E-01 | 9.57E-01 |
| KC6           | -3.12 | 1.58E-01 | 1.00E+00 | -1.29 | 6.88E-01 | 9.57E-01 |
| KRTAP4-3      | -1.62 | 5.15E-01 | 1.00E+00 | -1.29 | 6.89E-01 | 9.57E-01 |
| AC008966.1    | 0.08  | 8.99E-01 | 1.00E+00 | 0.22  | 6.89E-01 | 9.57E-01 |
| ZADH2         | -0.04 | 8.31E-01 | 1.00E+00 | 0.11  | 6.89E-01 | 9.57E-01 |
| DHX35         | 0.16  | 4.37E-01 | 1.00E+00 | 0.11  | 6.89E-01 | 9.57E-01 |
| TLE4          | 0.09  | 7.66E-01 | 1.00E+00 | 0.12  | 6.89E-01 | 9.57E-01 |
| MPP4          | -1.96 | 1.47E-01 | 1.00E+00 | 0.42  | 6.89E-01 | 9.57E-01 |
| CD300LF       | 0.17  | 9.06E-01 | 1.00E+00 | 1.26  | 6.89E-01 | 9.57E-01 |
| AC006504.8    | 0.11  | 9.27E-01 | 1.00E+00 | -0.41 | 6.89E-01 | 9.57E-01 |
| TSPY26P       | 0.55  | 2.34E-01 | 1.00E+00 | 0.30  | 6.89E-01 | 9.57E-01 |
| SUN2          | 0.16  | 4.33E-01 | 1.00E+00 | -0.22 | 6.89E-01 | 9.57E-01 |
| TOMM5         | -0.10 | 8.94E-01 | 1.00E+00 | 0.30  | 6.89E-01 | 9.57E-01 |

|            |       |          |          |       |          |          |
|------------|-------|----------|----------|-------|----------|----------|
| SLF2       | 0.00  | 9.96E-01 | 1.00E+00 | 0.10  | 6.89E-01 | 9.57E-01 |
| LRRC26     | 0.48  | 6.87E-01 | 1.00E+00 | -0.41 | 6.89E-01 | 9.57E-01 |
| TEKT4      | -1.70 | 6.18E-01 | 1.00E+00 | -0.38 | 6.89E-01 | 9.57E-01 |
| TEC        | 0.20  | 7.50E-01 | 1.00E+00 | 0.20  | 6.89E-01 | 9.57E-01 |
| TMEM187    | -0.08 | 7.66E-01 | 1.00E+00 | -0.10 | 6.89E-01 | 9.57E-01 |
| HERPUD1    | -0.20 | 3.06E-01 | 1.00E+00 | -0.14 | 6.89E-01 | 9.57E-01 |
| KLHL29     | -0.39 | 2.40E-01 | 1.00E+00 | 0.20  | 6.89E-01 | 9.57E-01 |
| C15orf53   | -2.32 | 2.97E-01 | 1.00E+00 | 0.31  | 6.89E-01 | 9.57E-01 |
| GPA33      | 0.41  | 7.14E-01 | 1.00E+00 | -0.48 | 6.89E-01 | 9.57E-01 |
| SMIM17     | -0.25 | 9.10E-01 | 1.00E+00 | -0.50 | 6.89E-01 | 9.57E-01 |
| MT1XP1     | -0.41 | 7.96E-01 | 1.00E+00 | -0.24 | 6.89E-01 | 9.58E-01 |
| AC000068.1 | -0.56 | 4.34E-01 | 1.00E+00 | -0.32 | 6.90E-01 | 9.58E-01 |
| MAPKAPK3   | -0.13 | 6.89E-01 | 1.00E+00 | 0.14  | 6.90E-01 | 9.58E-01 |
| FEM1A      | -0.13 | 7.66E-01 | 1.00E+00 | 0.19  | 6.90E-01 | 9.58E-01 |
| SLC25A5    | -0.38 | 4.44E-02 | 1.00E+00 | 0.11  | 6.90E-01 | 9.58E-01 |
| TAGLN2P1   | -2.32 | 2.41E-01 | 1.00E+00 | 0.34  | 6.90E-01 | 9.58E-01 |
| STAU2-AS1  | 1.18  | 1.88E-01 | 1.00E+00 | -0.39 | 6.90E-01 | 9.58E-01 |
| ELMO1      | -0.16 | 6.82E-01 | 1.00E+00 | 0.15  | 6.90E-01 | 9.58E-01 |
| FBXO31     | 0.06  | 7.18E-01 | 1.00E+00 | -0.22 | 6.90E-01 | 9.58E-01 |
| YLPM1      | -0.18 | 3.89E-01 | 1.00E+00 | 0.15  | 6.90E-01 | 9.58E-01 |
| LINC01237  | 0.81  | 3.85E-01 | 1.00E+00 | -0.42 | 6.90E-01 | 9.58E-01 |
| PTPRT      | -0.12 | 8.17E-01 | 1.00E+00 | 0.28  | 6.90E-01 | 9.58E-01 |
| GJA3       | -1.93 | 1.12E-02 | 6.54E-01 | -0.48 | 6.90E-01 | 9.58E-01 |
| APLNR      | 0.62  | 4.16E-01 | 1.00E+00 | 0.23  | 6.90E-01 | 9.58E-01 |
| SURF6      | 0.04  | 8.73E-01 | 1.00E+00 | 0.12  | 6.90E-01 | 9.58E-01 |
| C10orf55   | -1.25 | 2.68E-01 | 1.00E+00 | -0.32 | 6.90E-01 | 9.58E-01 |
| TSPAN10    | -0.13 | 7.15E-01 | 1.00E+00 | 0.17  | 6.90E-01 | 9.58E-01 |
| DNPEP      | -0.07 | 7.27E-01 | 1.00E+00 | -0.16 | 6.90E-01 | 9.58E-01 |
| AL359762.1 | -0.54 | 4.95E-01 | 1.00E+00 | 0.23  | 6.90E-01 | 9.58E-01 |
| WBP2       | 0.00  | 9.79E-01 | 1.00E+00 | 0.06  | 6.90E-01 | 9.58E-01 |
| AC092354.2 | -0.38 | 6.17E-01 | 1.00E+00 | -0.24 | 6.90E-01 | 9.58E-01 |
| MRO        | 0.79  | 3.62E-01 | 1.00E+00 | 0.49  | 6.90E-01 | 9.58E-01 |

|                   |        |          |          |       |          |          |
|-------------------|--------|----------|----------|-------|----------|----------|
| <b>AC100810.1</b> | -0.13  | 6.96E-01 | 1.00E+00 | -0.14 | 6.91E-01 | 9.58E-01 |
| <b>CNIH3</b>      | -0.16  | 6.95E-01 | 1.00E+00 | 0.15  | 6.91E-01 | 9.58E-01 |
| <b>IGKV1-6</b>    | 1.34   | 4.83E-01 | 1.00E+00 | 1.27  | 6.91E-01 | 9.58E-01 |
| <b>CPNE9</b>      | -4.39  | 1.61E-05 | 4.93E-03 | -0.36 | 6.91E-01 | 9.58E-01 |
| <b>TIMM44</b>     | -0.17  | 3.72E-01 | 1.00E+00 | 0.09  | 6.91E-01 | 9.58E-01 |
| <b>MINDY4</b>     | -2.02  | 1.61E-01 | 1.00E+00 | -0.24 | 6.91E-01 | 9.58E-01 |
| <b>LINC00888</b>  | 0.20   | 7.22E-01 | 1.00E+00 | -0.16 | 6.91E-01 | 9.58E-01 |
| <b>RPL39L</b>     | 0.08   | 7.89E-01 | 1.00E+00 | 0.10  | 6.91E-01 | 9.58E-01 |
| <b>LINC02188</b>  | -0.29  | 7.50E-01 | 1.00E+00 | 0.39  | 6.91E-01 | 9.58E-01 |
| <b>RYR2</b>       | -1.37  | 1.40E-02 | 7.46E-01 | 0.31  | 6.91E-01 | 9.58E-01 |
| <b>ADRB2</b>      | -1.09  | 3.09E-01 | 1.00E+00 | 0.23  | 6.91E-01 | 9.58E-01 |
| <b>STRN4</b>      | -0.26  | 3.20E-01 | 1.00E+00 | 0.20  | 6.91E-01 | 9.58E-01 |
| <b>GSTM4</b>      | -0.04  | 8.93E-01 | 1.00E+00 | -0.09 | 6.91E-01 | 9.58E-01 |
| <b>AL049629.1</b> | 0.50   | 6.54E-01 | 1.00E+00 | 0.30  | 6.91E-01 | 9.58E-01 |
| <b>DST</b>        | -0.08  | 6.81E-01 | 1.00E+00 | -0.13 | 6.91E-01 | 9.58E-01 |
| <b>CCAR1</b>      | -0.02  | 9.21E-01 | 1.00E+00 | 0.06  | 6.91E-01 | 9.58E-01 |
| <b>AMDHD1</b>     | -0.56  | 3.61E-01 | 1.00E+00 | 0.25  | 6.91E-01 | 9.58E-01 |
| <b>CNN1</b>       | -0.15  | 8.30E-01 | 1.00E+00 | -0.18 | 6.91E-01 | 9.58E-01 |
| <b>AKAP8L</b>     | -0.25  | 3.07E-01 | 1.00E+00 | -0.30 | 6.91E-01 | 9.58E-01 |
| <b>SFTA1P</b>     | 2.32   | 2.78E-01 | 1.00E+00 | -0.58 | 6.91E-01 | 9.58E-01 |
| <b>DHFR2</b>      | 0.14   | 5.35E-01 | 1.00E+00 | -0.15 | 6.91E-01 | 9.58E-01 |
| <b>AC018738.1</b> | 0.67   | 6.08E-01 | 1.00E+00 | 0.30  | 6.91E-01 | 9.58E-01 |
| <b>KRTAP4-6</b>   | -18.10 | 1.06E-07 | 4.38E-05 | -1.27 | 6.91E-01 | 9.58E-01 |
| <b>ACCSL</b>      | -2.45  | 2.18E-01 | 1.00E+00 | 0.75  | 6.92E-01 | 9.58E-01 |
| <b>PHF13</b>      | -0.07  | 7.76E-01 | 1.00E+00 | 0.17  | 6.92E-01 | 9.58E-01 |
| <b>TRAPPC3</b>    | 0.14   | 4.13E-01 | 1.00E+00 | -0.11 | 6.92E-01 | 9.58E-01 |
| <b>LINC02570</b>  | -0.25  | 6.09E-01 | 1.00E+00 | -0.30 | 6.92E-01 | 9.58E-01 |
| <b>SEPHS2</b>     | -0.17  | 2.68E-01 | 1.00E+00 | -0.18 | 6.92E-01 | 9.58E-01 |
| <b>GLRA4</b>      | -2.26  | 1.99E-02 | 8.80E-01 | 0.40  | 6.92E-01 | 9.58E-01 |
| <b>AL353147.1</b> | -0.50  | 5.51E-01 | 1.00E+00 | -0.25 | 6.92E-01 | 9.58E-01 |
| <b>FASLG</b>      | -2.56  | 1.70E-01 | 1.00E+00 | 0.54  | 6.92E-01 | 9.58E-01 |
| <b>PRKAG2</b>     | 0.16   | 5.28E-01 | 1.00E+00 | -0.13 | 6.92E-01 | 9.58E-01 |

|             |       |          |          |       |          |          |
|-------------|-------|----------|----------|-------|----------|----------|
| KRTAP10-3   | -1.59 | 1.44E-01 | 1.00E+00 | -1.27 | 6.92E-01 | 9.58E-01 |
| PSMD4       | 0.04  | 8.03E-01 | 1.00E+00 | -0.10 | 6.92E-01 | 9.58E-01 |
| AC018413.1  | -0.63 | 2.81E-01 | 1.00E+00 | 0.26  | 6.92E-01 | 9.58E-01 |
| LSM10       | -0.04 | 8.18E-01 | 1.00E+00 | 0.09  | 6.92E-01 | 9.58E-01 |
| GRM7        | -2.26 | 3.11E-01 | 1.00E+00 | -0.48 | 6.92E-01 | 9.58E-01 |
| C1orf53     | -1.35 | 1.95E-02 | 8.74E-01 | 0.12  | 6.92E-01 | 9.58E-01 |
| YAP1        | 0.12  | 5.46E-01 | 1.00E+00 | 0.18  | 6.92E-01 | 9.58E-01 |
| IDUA        | 0.12  | 7.69E-01 | 1.00E+00 | 0.34  | 6.93E-01 | 9.58E-01 |
| CASD1       | 0.31  | 3.03E-01 | 1.00E+00 | -0.19 | 6.93E-01 | 9.58E-01 |
| XLOC_010249 | -3.89 | 1.58E-01 | 1.00E+00 | 0.61  | 6.93E-01 | 9.58E-01 |
| NT5C3B      | -0.32 | 2.44E-01 | 1.00E+00 | -0.13 | 6.93E-01 | 9.58E-01 |
| AP005205.2  | NA    | NA       | NA       | -0.44 | 6.93E-01 | 9.58E-01 |
| THSD8       | -3.28 | 7.52E-02 | 1.00E+00 | -0.51 | 6.93E-01 | 9.58E-01 |
| EDAR        | -0.84 | 1.27E-01 | 1.00E+00 | 0.32  | 6.93E-01 | 9.58E-01 |
| AP000873.2  | -0.13 | 9.00E-01 | 1.00E+00 | 0.20  | 6.93E-01 | 9.58E-01 |
| AC006262.2  | 0.31  | 5.44E-01 | 1.00E+00 | -0.31 | 6.93E-01 | 9.58E-01 |
| KCNK5       | -0.17 | 8.05E-01 | 1.00E+00 | -1.06 | 6.93E-01 | 9.58E-01 |
| HARS2       | 0.13  | 4.92E-01 | 1.00E+00 | -0.08 | 6.93E-01 | 9.58E-01 |
| SAP30L      | 0.39  | 1.61E-01 | 1.00E+00 | 0.16  | 6.93E-01 | 9.58E-01 |
| PRDX1       | 0.08  | 5.49E-01 | 1.00E+00 | 0.06  | 6.93E-01 | 9.58E-01 |
| AADACP1     | 2.10  | 2.80E-02 | 9.75E-01 | 0.46  | 6.93E-01 | 9.58E-01 |
| PPP2R2B     | -0.32 | 5.27E-01 | 1.00E+00 | 0.14  | 6.93E-01 | 9.58E-01 |
| AC005077.4  | -1.06 | 4.59E-02 | 1.00E+00 | 0.57  | 6.93E-01 | 9.58E-01 |
| UTP11       | -0.01 | 9.76E-01 | 1.00E+00 | -0.11 | 6.93E-01 | 9.58E-01 |
| WDR88       | -2.36 | 1.04E-03 | 1.67E-01 | -0.27 | 6.93E-01 | 9.58E-01 |
| PTGES3P2    | 3.08  | 8.13E-02 | 1.00E+00 | 0.54  | 6.93E-01 | 9.58E-01 |
| LINC00853   | 1.08  | 2.60E-01 | 1.00E+00 | 0.28  | 6.93E-01 | 9.58E-01 |
| G27536      | 4.40  | 6.77E-03 | 4.99E-01 | -0.40 | 6.93E-01 | 9.58E-01 |
| GPR55       | -2.13 | 1.03E-01 | 1.00E+00 | 0.56  | 6.93E-01 | 9.58E-01 |
| USP46-AS1   | -0.54 | 1.08E-01 | 1.00E+00 | -0.30 | 6.94E-01 | 9.58E-01 |
| LINC02004   | -1.44 | 4.73E-01 | 1.00E+00 | -0.34 | 6.94E-01 | 9.58E-01 |
| CACTIN      | -0.32 | 1.60E-01 | 1.00E+00 | 0.28  | 6.94E-01 | 9.58E-01 |

|                    |       |          |          |       |          |          |
|--------------------|-------|----------|----------|-------|----------|----------|
| <b>RDH12</b>       | 0.24  | 6.66E-01 | 1.00E+00 | 0.24  | 6.94E-01 | 9.58E-01 |
| <b>THUMPD3-AS1</b> | -0.16 | 5.20E-01 | 1.00E+00 | -0.13 | 6.94E-01 | 9.58E-01 |
| <b>CABYR</b>       | -0.47 | 3.66E-01 | 1.00E+00 | -0.15 | 6.94E-01 | 9.58E-01 |
| <b>CX3CL1</b>      | -0.57 | 2.08E-01 | 1.00E+00 | 0.27  | 6.94E-01 | 9.58E-01 |
| <b>PBX4</b>        | -0.21 | 7.07E-01 | 1.00E+00 | -0.26 | 6.94E-01 | 9.58E-01 |
| <b>NUDT9</b>       | 0.08  | 6.78E-01 | 1.00E+00 | 0.10  | 6.94E-01 | 9.58E-01 |
| <b>TMSB4XP4</b>    | -0.48 | 3.11E-01 | 1.00E+00 | 0.29  | 6.94E-01 | 9.58E-01 |
| <b>CYP4V2</b>      | 0.09  | 8.30E-01 | 1.00E+00 | -0.17 | 6.94E-01 | 9.58E-01 |
| <b>AP004609.3</b>  | 0.20  | 6.93E-01 | 1.00E+00 | -0.13 | 6.94E-01 | 9.58E-01 |
| <b>AC027117.2</b>  | -1.87 | 1.59E-01 | 1.00E+00 | 0.31  | 6.94E-01 | 9.58E-01 |
| <b>KCTD9</b>       | 0.26  | 3.00E-01 | 1.00E+00 | -0.09 | 6.94E-01 | 9.58E-01 |
| <b>CXCL14</b>      | 0.21  | 4.94E-01 | 1.00E+00 | -0.18 | 6.94E-01 | 9.58E-01 |
| <b>RPL23AP25</b>   | -0.89 | 5.03E-01 | 1.00E+00 | -0.29 | 6.94E-01 | 9.58E-01 |
| <b>RBP2</b>        | 1.03  | 4.94E-01 | 1.00E+00 | 0.57  | 6.94E-01 | 9.58E-01 |
| <b>AC008982.2</b>  | 1.00  | 5.15E-01 | 1.00E+00 | -0.25 | 6.94E-01 | 9.58E-01 |
| <b>XLOC_005592</b> | 0.20  | 7.39E-01 | 1.00E+00 | 0.31  | 6.94E-01 | 9.58E-01 |
| <b>AC010343.1</b>  | -1.15 | 2.14E-01 | 1.00E+00 | 0.39  | 6.94E-01 | 9.58E-01 |
| <b>BAALC-AS2</b>   | -0.52 | 7.83E-01 | 1.00E+00 | -0.31 | 6.94E-01 | 9.58E-01 |
| <b>ITPK1</b>       | 0.07  | 8.52E-01 | 1.00E+00 | 0.26  | 6.94E-01 | 9.58E-01 |
| <b>HERC2P3</b>     | -0.70 | 4.01E-01 | 1.00E+00 | -0.28 | 6.94E-01 | 9.58E-01 |
| <b>C1QTNF4</b>     | 0.12  | 8.10E-01 | 1.00E+00 | 0.33  | 6.94E-01 | 9.58E-01 |
| <b>ENTR1</b>       | -0.21 | 2.95E-01 | 1.00E+00 | 0.20  | 6.94E-01 | 9.58E-01 |
| <b>COQ4</b>        | -0.21 | 4.87E-01 | 1.00E+00 | -0.08 | 6.94E-01 | 9.58E-01 |
| <b>RPS18P9</b>     | -0.72 | 4.99E-03 | 4.14E-01 | 0.13  | 6.95E-01 | 9.58E-01 |
| <b>ZNF473</b>      | 0.23  | 5.20E-01 | 1.00E+00 | -0.13 | 6.95E-01 | 9.58E-01 |
| <b>ZMIZ1-AS1</b>   | -0.31 | 4.95E-01 | 1.00E+00 | 0.19  | 6.95E-01 | 9.58E-01 |
| <b>SWSAP1</b>      | -0.60 | 7.86E-02 | 1.00E+00 | -0.13 | 6.95E-01 | 9.58E-01 |
| <b>GPR108</b>      | -0.19 | 2.26E-01 | 1.00E+00 | -0.07 | 6.95E-01 | 9.58E-01 |
| <b>LINC00240</b>   | -0.32 | 6.98E-01 | 1.00E+00 | -0.28 | 6.95E-01 | 9.58E-01 |
| <b>AC090543.2</b>  | 1.08  | 4.48E-01 | 1.00E+00 | -0.25 | 6.95E-01 | 9.58E-01 |
| <b>POLR1C</b>      | 0.07  | 7.50E-01 | 1.00E+00 | -0.14 | 6.95E-01 | 9.58E-01 |
| <b>DAGLA</b>       | 0.12  | 8.32E-01 | 1.00E+00 | -1.23 | 6.95E-01 | 9.58E-01 |



|                    |       |          |          |       |          |          |
|--------------------|-------|----------|----------|-------|----------|----------|
| <b>AL356512.1</b>  | -3.21 | 6.08E-02 | 1.00E+00 | -0.32 | 6.95E-01 | 9.58E-01 |
| <b>AC007216.3</b>  | -1.48 | 3.24E-01 | 1.00E+00 | 0.36  | 6.95E-01 | 9.58E-01 |
| <b>AC022509.3</b>  | -0.73 | 2.99E-01 | 1.00E+00 | -0.20 | 6.95E-01 | 9.58E-01 |
| <b>ULK4</b>        | 0.39  | 3.69E-01 | 1.00E+00 | -0.16 | 6.95E-01 | 9.58E-01 |
| <b>B3GALT5</b>     | -0.76 | 2.39E-01 | 1.00E+00 | -0.33 | 6.95E-01 | 9.58E-01 |
| <b>LINC01197</b>   | -0.35 | 4.84E-01 | 1.00E+00 | 0.23  | 6.95E-01 | 9.58E-01 |
| <b>LRP5L</b>       | 0.09  | 9.23E-01 | 1.00E+00 | 0.40  | 6.95E-01 | 9.58E-01 |
| <b>VPREB3</b>      | 2.74  | 2.27E-02 | 9.05E-01 | -0.43 | 6.95E-01 | 9.58E-01 |
| <b>RPL7P50</b>     | -1.10 | 7.53E-01 | 1.00E+00 | 0.47  | 6.95E-01 | 9.58E-01 |
| <b>PCNPP1</b>      | -1.60 | 6.41E-01 | 1.00E+00 | -0.29 | 6.95E-01 | 9.58E-01 |
| <b>G41367</b>      | 2.07  | 1.42E-03 | 2.07E-01 | 0.41  | 6.95E-01 | 9.58E-01 |
| <b>USP20</b>       | 0.01  | 9.70E-01 | 1.00E+00 | 0.18  | 6.95E-01 | 9.58E-01 |
| <b>SH2D1B</b>      | 0.42  | 7.85E-01 | 1.00E+00 | 0.46  | 6.95E-01 | 9.58E-01 |
| <b>AL080243.2</b>  | -0.32 | 7.92E-01 | 1.00E+00 | 0.20  | 6.95E-01 | 9.58E-01 |
| <b>AC135584.1</b>  | 0.35  | 7.59E-01 | 1.00E+00 | -0.41 | 6.95E-01 | 9.58E-01 |
| <b>AFDN</b>        | 0.11  | 6.51E-01 | 1.00E+00 | 0.15  | 6.95E-01 | 9.58E-01 |
| <b>SOAT1</b>       | 0.29  | 4.65E-01 | 1.00E+00 | -0.22 | 6.95E-01 | 9.58E-01 |
| <b>PPP1R26P1</b>   | -1.41 | 2.12E-01 | 1.00E+00 | -0.43 | 6.95E-01 | 9.58E-01 |
| <b>GNAI3</b>       | 0.04  | 9.14E-01 | 1.00E+00 | -0.11 | 6.95E-01 | 9.58E-01 |
| <b>MTRF1</b>       | -0.07 | 8.39E-01 | 1.00E+00 | 0.09  | 6.95E-01 | 9.58E-01 |
| <b>MTDH</b>        | 0.08  | 6.41E-01 | 1.00E+00 | -0.09 | 6.95E-01 | 9.58E-01 |
| <b>LRRC36</b>      | -0.24 | 8.29E-01 | 1.00E+00 | -0.41 | 6.96E-01 | 9.58E-01 |
| <b>XLOC_002192</b> | 0.88  | 5.45E-01 | 1.00E+00 | -0.29 | 6.96E-01 | 9.58E-01 |
| <b>IL13RA2</b>     | 0.15  | 8.73E-01 | 1.00E+00 | -0.41 | 6.96E-01 | 9.58E-01 |
| <b>C9</b>          | -0.95 | 6.36E-01 | 1.00E+00 | 0.44  | 6.96E-01 | 9.58E-01 |
| <b>AC091153.3</b>  | 0.15  | 9.62E-01 | 1.00E+00 | -0.40 | 6.96E-01 | 9.58E-01 |
| <b>AC106900.2</b>  | -0.08 | 9.58E-01 | 1.00E+00 | 0.36  | 6.96E-01 | 9.58E-01 |
| <b>FILIP1</b>      | 0.21  | 7.40E-01 | 1.00E+00 | -0.20 | 6.96E-01 | 9.58E-01 |
| <b>DHX9</b>        | -0.06 | 7.09E-01 | 1.00E+00 | 0.11  | 6.96E-01 | 9.58E-01 |
| <b>AC084082.1</b>  | 3.06  | 2.73E-01 | 1.00E+00 | 0.69  | 6.96E-01 | 9.58E-01 |
| <b>AC006064.5</b>  | 0.31  | 8.66E-01 | 1.00E+00 | 0.39  | 6.96E-01 | 9.58E-01 |
| <b>AC092376.2</b>  | 0.16  | 7.74E-01 | 1.00E+00 | 0.27  | 6.96E-01 | 9.58E-01 |

|                   |       |          |          |       |          |          |
|-------------------|-------|----------|----------|-------|----------|----------|
| <b>C12orf29</b>   | 0.07  | 8.61E-01 | 1.00E+00 | -0.18 | 6.96E-01 | 9.58E-01 |
| <b>FDPS</b>       | -0.14 | 7.04E-01 | 1.00E+00 | -0.15 | 6.96E-01 | 9.58E-01 |
| <b>MEN1</b>       | -0.26 | 1.55E-01 | 1.00E+00 | -0.26 | 6.96E-01 | 9.58E-01 |
| <b>GALNT11</b>    | 0.09  | 6.88E-01 | 1.00E+00 | -0.09 | 6.96E-01 | 9.58E-01 |
| <b>CDK13</b>      | -0.20 | 2.71E-01 | 1.00E+00 | 0.15  | 6.96E-01 | 9.58E-01 |
| <b>AC079807.1</b> | -0.09 | 7.82E-01 | 1.00E+00 | 0.26  | 6.96E-01 | 9.58E-01 |
| <b>PSMC5</b>      | -0.08 | 7.00E-01 | 1.00E+00 | -0.08 | 6.96E-01 | 9.58E-01 |
| <b>NTRK3</b>      | -0.69 | 2.22E-01 | 1.00E+00 | -0.24 | 6.96E-01 | 9.58E-01 |
| <b>LINC01990</b>  | -0.52 | 7.03E-01 | 1.00E+00 | 0.36  | 6.96E-01 | 9.58E-01 |
| <b>TBCB</b>       | -0.15 | 3.62E-01 | 1.00E+00 | 0.08  | 6.96E-01 | 9.58E-01 |
| <b>AL513303.1</b> | -0.40 | 3.95E-01 | 1.00E+00 | -0.30 | 6.96E-01 | 9.58E-01 |
| <b>AC007423.1</b> | 0.48  | 8.87E-01 | 1.00E+00 | 0.55  | 6.97E-01 | 9.58E-01 |
| <b>RPS11P5</b>    | -0.67 | 4.17E-01 | 1.00E+00 | 0.36  | 6.97E-01 | 9.58E-01 |
| <b>ICE1</b>       | -0.09 | 6.01E-01 | 1.00E+00 | 0.15  | 6.97E-01 | 9.58E-01 |
| <b>GIN52</b>      | -0.81 | 5.75E-03 | 4.50E-01 | -0.15 | 6.97E-01 | 9.58E-01 |
| <b>AC245297.2</b> | 0.25  | 6.58E-01 | 1.00E+00 | 0.29  | 6.97E-01 | 9.58E-01 |
| <b>AL445483.1</b> | -0.66 | 5.28E-01 | 1.00E+00 | 0.39  | 6.97E-01 | 9.58E-01 |
| <b>AL513523.1</b> | -1.11 | 7.45E-01 | 1.00E+00 | 0.52  | 6.97E-01 | 9.58E-01 |
| <b>SLC38A11</b>   | 0.62  | 2.93E-01 | 1.00E+00 | 0.43  | 6.97E-01 | 9.58E-01 |
| <b>CPSF1</b>      | -0.24 | 2.16E-01 | 1.00E+00 | 0.17  | 6.97E-01 | 9.58E-01 |
| <b>ARL4AP2</b>    | 1.46  | 6.71E-01 | 1.00E+00 | -0.25 | 6.97E-01 | 9.58E-01 |
| <b>HSBP1L1</b>    | 0.03  | 9.38E-01 | 1.00E+00 | -0.16 | 6.97E-01 | 9.58E-01 |
| <b>HIST2H2AA3</b> | -2.94 | 8.14E-03 | 5.56E-01 | 0.21  | 6.97E-01 | 9.58E-01 |
| <b>TGFBR2</b>     | 0.27  | 4.90E-01 | 1.00E+00 | 0.24  | 6.97E-01 | 9.58E-01 |
| <b>TNRC6B</b>     | 0.01  | 9.68E-01 | 1.00E+00 | 0.14  | 6.97E-01 | 9.58E-01 |
| <b>AQP7P1</b>     | 1.73  | 6.05E-01 | 1.00E+00 | -0.95 | 6.97E-01 | 9.58E-01 |
| <b>AC087500.1</b> | 0.60  | 7.24E-01 | 1.00E+00 | -0.19 | 6.97E-01 | 9.58E-01 |
| <b>RPS2P32</b>    | 1.19  | 1.15E-01 | 1.00E+00 | -0.29 | 6.97E-01 | 9.58E-01 |
| <b>CTR9</b>       | 0.11  | 4.83E-01 | 1.00E+00 | 0.08  | 6.97E-01 | 9.58E-01 |
| <b>PTCD1</b>      | -0.54 | 3.09E-01 | 1.00E+00 | 0.15  | 6.97E-01 | 9.58E-01 |
| <b>KPTN</b>       | -0.31 | 3.51E-01 | 1.00E+00 | 0.16  | 6.97E-01 | 9.58E-01 |
| <b>FAM86B1</b>    | 0.40  | 5.17E-01 | 1.00E+00 | -0.18 | 6.97E-01 | 9.58E-01 |

|                    |       |          |          |       |          |          |
|--------------------|-------|----------|----------|-------|----------|----------|
| <b>ANKRD30A</b>    | 2.52  | 2.74E-01 | 1.00E+00 | -1.24 | 6.97E-01 | 9.58E-01 |
| <b>MT4</b>         | 0.42  | 8.97E-01 | 1.00E+00 | -0.44 | 6.97E-01 | 9.58E-01 |
| <b>LLPH</b>        | -0.14 | 5.56E-01 | 1.00E+00 | -0.12 | 6.97E-01 | 9.58E-01 |
| <b>AP1G2</b>       | -0.10 | 7.80E-01 | 1.00E+00 | 0.12  | 6.97E-01 | 9.58E-01 |
| <b>TPSG1</b>       | -0.61 | 4.65E-01 | 1.00E+00 | 0.36  | 6.97E-01 | 9.58E-01 |
| <b>CACNB2</b>      | -0.78 | 1.24E-01 | 1.00E+00 | -0.21 | 6.97E-01 | 9.58E-01 |
| <b>FBXL2</b>       | 0.28  | 5.98E-01 | 1.00E+00 | 0.25  | 6.97E-01 | 9.58E-01 |
| <b>FAM218A</b>     | 0.71  | 3.10E-01 | 1.00E+00 | 0.28  | 6.97E-01 | 9.58E-01 |
| <b>XLOC_012849</b> | -0.42 | 7.11E-01 | 1.00E+00 | -0.40 | 6.98E-01 | 9.58E-01 |
| <b>TACC1</b>       | 0.44  | 2.17E-01 | 1.00E+00 | 0.15  | 6.98E-01 | 9.58E-01 |
| <b>TIGD6</b>       | -0.08 | 8.17E-01 | 1.00E+00 | 0.07  | 6.98E-01 | 9.58E-01 |
| <b>ZC3H3</b>       | -0.39 | 1.40E-01 | 1.00E+00 | 0.18  | 6.98E-01 | 9.58E-01 |
| <b>SCAP</b>        | -0.09 | 5.71E-01 | 1.00E+00 | -0.19 | 6.98E-01 | 9.58E-01 |
| <b>IFNGR2</b>      | -0.03 | 8.86E-01 | 1.00E+00 | -0.09 | 6.98E-01 | 9.58E-01 |
| <b>VEZF1</b>       | 0.10  | 6.23E-01 | 1.00E+00 | 0.08  | 6.98E-01 | 9.58E-01 |
| <b>AL358334.2</b>  | 0.34  | 9.14E-01 | 1.00E+00 | 0.70  | 6.98E-01 | 9.58E-01 |
| <b>DAZL</b>        | -3.36 | 3.21E-01 | 1.00E+00 | 1.24  | 6.98E-01 | 9.58E-01 |
| <b>PCDHAC2</b>     | -0.59 | 2.85E-01 | 1.00E+00 | -0.54 | 6.98E-01 | 9.58E-01 |
| <b>KLHL30-AS1</b>  | -1.72 | 1.65E-01 | 1.00E+00 | 0.51  | 6.98E-01 | 9.58E-01 |
| <b>SRRM1</b>       | -0.13 | 6.03E-01 | 1.00E+00 | -0.11 | 6.98E-01 | 9.58E-01 |
| <b>AL928921.1</b>  | 1.67  | 5.91E-01 | 1.00E+00 | -1.24 | 6.98E-01 | 9.58E-01 |
| <b>TFAP2E</b>      | -0.31 | 4.91E-01 | 1.00E+00 | -0.32 | 6.98E-01 | 9.58E-01 |
| <b>ANKRD40</b>     | 0.31  | 3.32E-01 | 1.00E+00 | 0.15  | 6.98E-01 | 9.58E-01 |
| <b>AC015802.4</b>  | -1.14 | 7.33E-01 | 1.00E+00 | -0.40 | 6.98E-01 | 9.58E-01 |
| <b>G10801</b>      | -0.54 | 7.63E-01 | 1.00E+00 | 1.22  | 6.98E-01 | 9.58E-01 |
| <b>FIS1</b>        | 0.06  | 6.84E-01 | 1.00E+00 | 0.04  | 6.98E-01 | 9.58E-01 |
| <b>TOX2</b>        | -0.12 | 7.77E-01 | 1.00E+00 | 0.27  | 6.98E-01 | 9.58E-01 |
| <b>SCAMP1-AS1</b>  | 0.00  | 9.99E-01 | 1.00E+00 | 0.11  | 6.98E-01 | 9.58E-01 |
| <b>FAAH2</b>       | -0.24 | 4.53E-01 | 1.00E+00 | -0.22 | 6.98E-01 | 9.58E-01 |
| <b>AL355312.1</b>  | -0.17 | 8.87E-01 | 1.00E+00 | -0.45 | 6.98E-01 | 9.58E-01 |
| <b>MED12</b>       | 0.00  | 9.86E-01 | 1.00E+00 | 0.20  | 6.98E-01 | 9.58E-01 |
| <b>MXD4</b>        | 0.02  | 9.53E-01 | 1.00E+00 | 0.18  | 6.98E-01 | 9.58E-01 |

|                    |       |          |          |       |          |          |
|--------------------|-------|----------|----------|-------|----------|----------|
| <b>AL031284.1</b>  | -0.08 | 9.82E-01 | 1.00E+00 | -0.27 | 6.98E-01 | 9.58E-01 |
| <b>RPL23AP49</b>   | 0.29  | 8.69E-01 | 1.00E+00 | -0.34 | 6.98E-01 | 9.58E-01 |
| <b>AC134312.4</b>  | -0.06 | 9.45E-01 | 1.00E+00 | 0.41  | 6.99E-01 | 9.58E-01 |
| <b>EFTUD2</b>      | -0.02 | 9.14E-01 | 1.00E+00 | 0.10  | 6.99E-01 | 9.59E-01 |
| <b>FO393411.1</b>  | -0.88 | 7.97E-01 | 1.00E+00 | -0.27 | 6.99E-01 | 9.59E-01 |
| <b>LIPG</b>        | -0.46 | 5.90E-01 | 1.00E+00 | 0.38  | 6.99E-01 | 9.59E-01 |
| <b>AC114939.1</b>  | 0.42  | 9.02E-01 | 1.00E+00 | -0.59 | 6.99E-01 | 9.59E-01 |
| <b>AC008608.2</b>  | -0.23 | 7.94E-01 | 1.00E+00 | -0.21 | 6.99E-01 | 9.59E-01 |
| <b>RPS29</b>       | -0.19 | 5.42E-01 | 1.00E+00 | -0.15 | 6.99E-01 | 9.59E-01 |
| <b>LTV1</b>        | 0.09  | 7.22E-01 | 1.00E+00 | -0.11 | 6.99E-01 | 9.59E-01 |
| <b>AC109454.4</b>  | 0.31  | 8.24E-01 | 1.00E+00 | -0.44 | 6.99E-01 | 9.59E-01 |
| <b>TSSK4</b>       | -0.08 | 9.21E-01 | 1.00E+00 | 0.40  | 6.99E-01 | 9.59E-01 |
| <b>PTCHD3</b>      | -0.19 | 8.76E-01 | 1.00E+00 | -0.45 | 6.99E-01 | 9.59E-01 |
| <b>RGPD2</b>       | -1.31 | 5.21E-01 | 1.00E+00 | -0.36 | 6.99E-01 | 9.59E-01 |
| <b>AC010422.3</b>  | NA    | NA       | NA       | 0.47  | 6.99E-01 | 9.59E-01 |
| <b>NXNL2</b>       | -0.04 | 9.72E-01 | 1.00E+00 | 0.25  | 6.99E-01 | 9.59E-01 |
| <b>FAM208A</b>     | -0.06 | 7.72E-01 | 1.00E+00 | 0.11  | 6.99E-01 | 9.59E-01 |
| <b>PAK3</b>        | 0.46  | 2.94E-01 | 1.00E+00 | -0.17 | 6.99E-01 | 9.59E-01 |
| <b>KLHL7-DT</b>    | -0.55 | 6.71E-01 | 1.00E+00 | -0.38 | 6.99E-01 | 9.59E-01 |
| <b>G32279</b>      | 0.08  | 9.52E-01 | 1.00E+00 | 0.43  | 7.00E-01 | 9.59E-01 |
| <b>NAPRT</b>       | 0.02  | 9.66E-01 | 1.00E+00 | 0.12  | 7.00E-01 | 9.59E-01 |
| <b>BOD1</b>        | 0.04  | 8.11E-01 | 1.00E+00 | -0.22 | 7.00E-01 | 9.59E-01 |
| <b>TEX14</b>       | -0.25 | 7.86E-01 | 1.00E+00 | 0.31  | 7.00E-01 | 9.59E-01 |
| <b>C1QL3</b>       | -0.97 | 7.15E-02 | 1.00E+00 | -0.21 | 7.00E-01 | 9.59E-01 |
| <b>TPR</b>         | -0.27 | 8.70E-02 | 1.00E+00 | 0.09  | 7.00E-01 | 9.59E-01 |
| <b>G31554</b>      | -0.98 | 3.49E-01 | 1.00E+00 | -0.27 | 7.00E-01 | 9.59E-01 |
| <b>AL137025.1</b>  | 0.34  | 7.45E-01 | 1.00E+00 | 0.41  | 7.00E-01 | 9.59E-01 |
| <b>XLOC_000585</b> | 1.73  | 2.36E-01 | 1.00E+00 | 0.60  | 7.00E-01 | 9.59E-01 |
| <b>LINC01124</b>   | 0.62  | 4.48E-01 | 1.00E+00 | -0.35 | 7.00E-01 | 9.59E-01 |
| <b>RFX7</b>        | -0.15 | 6.19E-01 | 1.00E+00 | 0.17  | 7.00E-01 | 9.59E-01 |
| <b>RPL23A</b>      | -0.23 | 4.05E-01 | 1.00E+00 | 0.21  | 7.00E-01 | 9.59E-01 |
| <b>RPL31</b>       | -0.06 | 8.58E-01 | 1.00E+00 | 0.10  | 7.00E-01 | 9.59E-01 |

|                   |        |          |          |       |          |          |
|-------------------|--------|----------|----------|-------|----------|----------|
| <b>TOMM20P4</b>   | 0.17   | 9.60E-01 | 1.00E+00 | -0.25 | 7.00E-01 | 9.59E-01 |
| <b>HACE1</b>      | 0.07   | 7.54E-01 | 1.00E+00 | -0.14 | 7.00E-01 | 9.59E-01 |
| <b>IK</b>         | -0.01  | 9.60E-01 | 1.00E+00 | -0.08 | 7.00E-01 | 9.59E-01 |
| <b>ADSSL1</b>     | -0.10  | 7.32E-01 | 1.00E+00 | -0.27 | 7.00E-01 | 9.59E-01 |
| <b>FAM167A</b>    | -0.04  | 9.27E-01 | 1.00E+00 | -0.22 | 7.00E-01 | 9.59E-01 |
| <b>PPP2R5B</b>    | 0.02   | 9.45E-01 | 1.00E+00 | -0.20 | 7.00E-01 | 9.59E-01 |
| <b>CHRNA2</b>     | 0.69   | 7.29E-01 | 1.00E+00 | -0.55 | 7.00E-01 | 9.59E-01 |
| <b>ARRDC4</b>     | 0.33   | 1.57E-01 | 1.00E+00 | 0.14  | 7.00E-01 | 9.59E-01 |
| <b>KRTAP9-4</b>   | -18.47 | 4.07E-08 | 1.76E-05 | -1.23 | 7.01E-01 | 9.59E-01 |
| <b>PROCA1</b>     | -0.35  | 6.18E-01 | 1.00E+00 | 0.23  | 7.01E-01 | 9.59E-01 |
| <b>LINC00839</b>  | -0.74  | 1.51E-01 | 1.00E+00 | 0.32  | 7.01E-01 | 9.59E-01 |
| <b>UCK2</b>       | 0.27   | 3.99E-01 | 1.00E+00 | 0.09  | 7.01E-01 | 9.59E-01 |
| <b>CREB5</b>      | 0.25   | 5.67E-01 | 1.00E+00 | 0.18  | 7.01E-01 | 9.59E-01 |
| <b>AC116036.2</b> | 1.20   | 3.59E-01 | 1.00E+00 | -0.34 | 7.01E-01 | 9.59E-01 |
| <b>RPL14P1</b>    | -0.38  | 2.48E-01 | 1.00E+00 | -0.23 | 7.01E-01 | 9.59E-01 |
| <b>GCHFR</b>      | -0.89  | 3.63E-01 | 1.00E+00 | -0.30 | 7.01E-01 | 9.59E-01 |
| <b>AC116407.3</b> | -4.65  | 1.99E-03 | 2.39E-01 | -0.37 | 7.01E-01 | 9.59E-01 |
| <b>BDNF-AS</b>    | -0.06  | 9.05E-01 | 1.00E+00 | -0.21 | 7.01E-01 | 9.59E-01 |
| <b>SHARPIN</b>    | -0.09  | 7.03E-01 | 1.00E+00 | -0.08 | 7.01E-01 | 9.59E-01 |
| <b>AC074194.2</b> | -3.19  | 4.05E-02 | 1.00E+00 | -0.37 | 7.01E-01 | 9.59E-01 |
| <b>AC004057.1</b> | 0.59   | 5.88E-02 | 1.00E+00 | 0.22  | 7.01E-01 | 9.59E-01 |
| <b>ZNF219</b>     | -0.14  | 5.92E-01 | 1.00E+00 | 0.27  | 7.01E-01 | 9.60E-01 |
| <b>ACTN1</b>      | -0.28  | 4.79E-01 | 1.00E+00 | 0.17  | 7.01E-01 | 9.60E-01 |
| <b>AL449212.1</b> | -0.12  | 8.86E-01 | 1.00E+00 | -0.30 | 7.01E-01 | 9.60E-01 |
| <b>AC074135.1</b> | 0.76   | 7.93E-01 | 1.00E+00 | -0.42 | 7.01E-01 | 9.60E-01 |
| <b>SKP2</b>       | 0.26   | 2.67E-01 | 1.00E+00 | -0.10 | 7.02E-01 | 9.60E-01 |
| <b>UMPS</b>       | 0.04   | 8.60E-01 | 1.00E+00 | -0.10 | 7.02E-01 | 9.60E-01 |
| <b>AIDA</b>       | 0.22   | 3.34E-01 | 1.00E+00 | 0.18  | 7.02E-01 | 9.60E-01 |
| <b>MIR2117HG</b>  | 5.14   | 5.95E-02 | 1.00E+00 | 0.53  | 7.02E-01 | 9.60E-01 |
| <b>RPL9</b>       | -0.01  | 9.73E-01 | 1.00E+00 | -0.10 | 7.02E-01 | 9.60E-01 |
| <b>AC026740.1</b> | -0.34  | 5.11E-01 | 1.00E+00 | 0.36  | 7.02E-01 | 9.60E-01 |
| <b>TRPC2</b>      | 0.03   | 9.79E-01 | 1.00E+00 | 0.30  | 7.02E-01 | 9.60E-01 |

|                    |        |          |          |       |          |          |
|--------------------|--------|----------|----------|-------|----------|----------|
| <b>AC135279.2</b>  | 0.56   | 8.71E-01 | 1.00E+00 | 0.34  | 7.02E-01 | 9.60E-01 |
| <b>PSEN1</b>       | 0.35   | 8.75E-02 | 1.00E+00 | -0.05 | 7.02E-01 | 9.60E-01 |
| <b>PCDHGA3</b>     | -0.35  | 6.13E-01 | 1.00E+00 | -0.31 | 7.02E-01 | 9.60E-01 |
| <b>LRP1B</b>       | 0.88   | 3.45E-01 | 1.00E+00 | -0.38 | 7.02E-01 | 9.60E-01 |
| <b>AL391988.1</b>  | 0.91   | 1.83E-01 | 1.00E+00 | -0.30 | 7.02E-01 | 9.60E-01 |
| <b>OPCML</b>       | -1.61  | 1.00E-01 | 1.00E+00 | -0.41 | 7.02E-01 | 9.60E-01 |
| <b>SULT2B1</b>     | 0.17   | 7.26E-01 | 1.00E+00 | 0.21  | 7.02E-01 | 9.60E-01 |
| <b>PLAGL2</b>      | -0.27  | 4.36E-01 | 1.00E+00 | 0.21  | 7.02E-01 | 9.60E-01 |
| <b>ECSCR</b>       | 0.04   | 9.31E-01 | 1.00E+00 | 0.16  | 7.02E-01 | 9.60E-01 |
| <b>KRTAP3-2</b>    | -19.52 | 8.03E-09 | 3.92E-06 | -1.23 | 7.02E-01 | 9.60E-01 |
| <b>EEF1A1P10</b>   | -1.46  | 6.72E-01 | 1.00E+00 | -0.29 | 7.02E-01 | 9.60E-01 |
| <b>HPGDS</b>       | 0.48   | 2.38E-01 | 1.00E+00 | -0.20 | 7.02E-01 | 9.60E-01 |
| <b>AC127526.2</b>  | 0.01   | 9.97E-01 | 1.00E+00 | 0.46  | 7.02E-01 | 9.60E-01 |
| <b>LINC00330</b>   | 0.02   | 9.87E-01 | 1.00E+00 | 0.68  | 7.02E-01 | 9.60E-01 |
| <b>DNAL4</b>       | 0.15   | 2.91E-01 | 1.00E+00 | 0.07  | 7.02E-01 | 9.60E-01 |
| <b>FZD3</b>        | -0.17  | 5.18E-01 | 1.00E+00 | -0.16 | 7.02E-01 | 9.60E-01 |
| <b>ITGA6</b>       | -0.09  | 7.14E-01 | 1.00E+00 | 0.12  | 7.02E-01 | 9.60E-01 |
| <b>AC084262.2</b>  | 1.57   | 4.26E-01 | 1.00E+00 | -0.63 | 7.02E-01 | 9.60E-01 |
| <b>VPS52</b>       | -0.27  | 2.14E-01 | 1.00E+00 | 0.08  | 7.03E-01 | 9.60E-01 |
| <b>MTTP</b>        | -2.22  | 1.57E-01 | 1.00E+00 | -0.31 | 7.03E-01 | 9.60E-01 |
| <b>GTF2H2B</b>     | -0.10  | 8.89E-01 | 1.00E+00 | 0.24  | 7.03E-01 | 9.60E-01 |
| <b>KRTAP24-1</b>   | -5.21  | 1.13E-01 | 1.00E+00 | -1.22 | 7.03E-01 | 9.60E-01 |
| <b>UTP15</b>       | -0.04  | 8.78E-01 | 1.00E+00 | 0.08  | 7.03E-01 | 9.60E-01 |
| <b>CCDC43</b>      | 0.19   | 4.11E-01 | 1.00E+00 | -0.10 | 7.03E-01 | 9.60E-01 |
| <b>RNF182</b>      | -0.19  | 7.56E-01 | 1.00E+00 | 0.33  | 7.03E-01 | 9.60E-01 |
| <b>AC010538.1</b>  | -0.11  | 9.02E-01 | 1.00E+00 | -0.29 | 7.03E-01 | 9.60E-01 |
| <b>AC104113.1</b>  | 0.24   | 8.43E-01 | 1.00E+00 | -0.26 | 7.03E-01 | 9.60E-01 |
| <b>KIF25</b>       | 0.63   | 5.75E-01 | 1.00E+00 | -0.40 | 7.03E-01 | 9.60E-01 |
| <b>NANOS1</b>      | 1.90   | 7.18E-03 | 5.13E-01 | -0.28 | 7.03E-01 | 9.60E-01 |
| <b>TBCK</b>        | -0.10  | 8.26E-01 | 1.00E+00 | -0.14 | 7.03E-01 | 9.60E-01 |
| <b>NCAPG2</b>      | -0.10  | 6.96E-01 | 1.00E+00 | -0.11 | 7.03E-01 | 9.60E-01 |
| <b>XLOC_000403</b> | -0.94  | 3.10E-01 | 1.00E+00 | 0.28  | 7.03E-01 | 9.60E-01 |

|                    |       |          |          |       |          |          |
|--------------------|-------|----------|----------|-------|----------|----------|
| <b>G25631</b>      | 0.28  | 7.01E-01 | 1.00E+00 | -0.38 | 7.03E-01 | 9.60E-01 |
| <b>WWC3</b>        | 0.12  | 4.24E-01 | 1.00E+00 | 0.13  | 7.03E-01 | 9.60E-01 |
| <b>XLOC_005361</b> | -2.92 | 5.28E-02 | 1.00E+00 | -0.24 | 7.03E-01 | 9.60E-01 |
| <b>MORF4L2</b>     | 0.08  | 6.67E-01 | 1.00E+00 | -0.06 | 7.03E-01 | 9.60E-01 |
| <b>TESK1</b>       | -0.22 | 3.21E-01 | 1.00E+00 | 0.24  | 7.03E-01 | 9.60E-01 |
| <b>LINC02237</b>   | 2.16  | 4.72E-01 | 1.00E+00 | -0.50 | 7.03E-01 | 9.60E-01 |
| <b>AC087623.2</b>  | -1.27 | 8.51E-02 | 1.00E+00 | -0.23 | 7.03E-01 | 9.60E-01 |
| <b>PRMT9</b>       | 0.03  | 8.75E-01 | 1.00E+00 | 0.10  | 7.04E-01 | 9.60E-01 |
| <b>JPH3</b>        | -1.55 | 1.02E-01 | 1.00E+00 | 0.57  | 7.04E-01 | 9.60E-01 |
| <b>ALDH1A3</b>     | 0.49  | 4.32E-01 | 1.00E+00 | 0.19  | 7.04E-01 | 9.60E-01 |
| <b>SOST</b>        | 3.62  | 3.21E-02 | 1.00E+00 | 0.42  | 7.04E-01 | 9.60E-01 |
| <b>TMTC1</b>       | 0.34  | 4.88E-01 | 1.00E+00 | 0.24  | 7.04E-01 | 9.60E-01 |
| <b>ZNF585B</b>     | 0.30  | 4.61E-01 | 1.00E+00 | 0.16  | 7.04E-01 | 9.60E-01 |
| <b>SYTL1</b>       | -0.10 | 8.00E-01 | 1.00E+00 | -0.20 | 7.04E-01 | 9.60E-01 |
| <b>AIMP2</b>       | -0.34 | 2.11E-01 | 1.00E+00 | 0.11  | 7.04E-01 | 9.60E-01 |
| <b>RSBN1L</b>      | 0.09  | 6.61E-01 | 1.00E+00 | 0.09  | 7.04E-01 | 9.60E-01 |
| <b>FCER1A</b>      | -0.44 | 3.70E-01 | 1.00E+00 | 0.23  | 7.04E-01 | 9.60E-01 |
| <b>HMGB3P24</b>    | 0.59  | 7.40E-01 | 1.00E+00 | 0.50  | 7.04E-01 | 9.60E-01 |
| <b>ARF6</b>        | -0.06 | 8.56E-01 | 1.00E+00 | -0.09 | 7.04E-01 | 9.60E-01 |
| <b>SBK1</b>        | -0.83 | 3.19E-02 | 1.00E+00 | -0.30 | 7.04E-01 | 9.60E-01 |
| <b>AC093752.2</b>  | 2.55  | 4.51E-01 | 1.00E+00 | -0.79 | 7.04E-01 | 9.60E-01 |
| <b>PCDHGB6</b>     | -0.26 | 4.17E-01 | 1.00E+00 | -0.14 | 7.04E-01 | 9.60E-01 |
| <b>UBE2V1</b>      | 0.10  | 9.13E-01 | 1.00E+00 | 0.18  | 7.04E-01 | 9.60E-01 |
| <b>BX539320.1</b>  | 0.01  | 9.91E-01 | 1.00E+00 | 0.47  | 7.04E-01 | 9.60E-01 |
| <b>OSBP2</b>       | -0.80 | 2.51E-02 | 9.28E-01 | 0.23  | 7.04E-01 | 9.60E-01 |
| <b>EMSY</b>        | 0.04  | 8.95E-01 | 1.00E+00 | 0.16  | 7.05E-01 | 9.60E-01 |
| <b>LINC02242</b>   | 1.67  | 4.21E-01 | 1.00E+00 | 0.38  | 7.05E-01 | 9.60E-01 |
| <b>NT5C1B</b>      | -3.21 | 3.57E-02 | 1.00E+00 | -0.49 | 7.05E-01 | 9.60E-01 |
| <b>SSSCA1</b>      | -0.24 | 3.10E-01 | 1.00E+00 | 0.10  | 7.05E-01 | 9.60E-01 |
| <b>AC009107.2</b>  | -2.09 | 2.62E-01 | 1.00E+00 | 0.37  | 7.05E-01 | 9.60E-01 |
| <b>DPP10</b>       | -1.57 | 6.65E-02 | 1.00E+00 | -0.49 | 7.05E-01 | 9.60E-01 |
| <b>LRRTM2</b>      | -1.32 | 8.50E-02 | 1.00E+00 | -0.25 | 7.05E-01 | 9.60E-01 |

|                   |       |          |          |       |          |          |
|-------------------|-------|----------|----------|-------|----------|----------|
| <b>AL355472.2</b> | NA    | NA       | NA       | -0.34 | 7.05E-01 | 9.60E-01 |
| <b>RELL1</b>      | -0.24 | 2.56E-01 | 1.00E+00 | -0.16 | 7.05E-01 | 9.60E-01 |
| <b>AL137779.2</b> | 0.05  | 9.06E-01 | 1.00E+00 | -0.16 | 7.05E-01 | 9.60E-01 |
| <b>FZR1</b>       | -0.23 | 3.57E-01 | 1.00E+00 | 0.20  | 7.05E-01 | 9.60E-01 |
| <b>AP000251.1</b> | -1.54 | 1.98E-01 | 1.00E+00 | 0.54  | 7.05E-01 | 9.60E-01 |
| <b>MEIS1</b>      | 0.38  | 2.91E-01 | 1.00E+00 | 0.14  | 7.05E-01 | 9.60E-01 |
| <b>SNRPB2</b>     | 0.12  | 5.10E-01 | 1.00E+00 | 0.05  | 7.05E-01 | 9.60E-01 |
| <b>CHST10</b>     | 0.30  | 4.90E-01 | 1.00E+00 | 0.28  | 7.05E-01 | 9.60E-01 |
| <b>SLC15A1</b>    | -0.13 | 8.22E-01 | 1.00E+00 | 0.20  | 7.05E-01 | 9.60E-01 |
| <b>SRA1</b>       | -0.27 | 2.79E-01 | 1.00E+00 | 0.10  | 7.05E-01 | 9.61E-01 |
| <b>SELENOKP1</b>  | 0.68  | 8.42E-01 | 1.00E+00 | -0.27 | 7.05E-01 | 9.61E-01 |
| <b>PMM1</b>       | 0.26  | 2.60E-01 | 1.00E+00 | -0.08 | 7.05E-01 | 9.61E-01 |
| <b>SNHG21</b>     | -2.50 | 8.39E-02 | 1.00E+00 | -0.27 | 7.06E-01 | 9.61E-01 |
| <b>AC084064.1</b> | -0.71 | 6.99E-01 | 1.00E+00 | -0.44 | 7.06E-01 | 9.61E-01 |
| <b>RNF217</b>     | -0.26 | 3.42E-01 | 1.00E+00 | 0.10  | 7.06E-01 | 9.61E-01 |
| <b>RPL21</b>      | -0.11 | 7.25E-01 | 1.00E+00 | -0.12 | 7.06E-01 | 9.61E-01 |
| <b>AC016957.2</b> | -1.30 | 8.63E-02 | 1.00E+00 | -0.23 | 7.06E-01 | 9.61E-01 |
| <b>UBE2W</b>      | 0.24  | 4.59E-01 | 1.00E+00 | -0.11 | 7.06E-01 | 9.61E-01 |
| <b>CGA</b>        | -5.23 | 1.18E-01 | 1.00E+00 | -1.21 | 7.06E-01 | 9.61E-01 |
| <b>FKBP1AP1</b>   | -0.68 | 8.44E-01 | 1.00E+00 | -0.45 | 7.06E-01 | 9.61E-01 |
| <b>SEMA4A</b>     | -0.33 | 3.07E-01 | 1.00E+00 | 0.20  | 7.06E-01 | 9.61E-01 |
| <b>CHST9</b>      | 0.38  | 7.04E-01 | 1.00E+00 | 0.35  | 7.06E-01 | 9.61E-01 |
| <b>AC005912.1</b> | 0.10  | 7.90E-01 | 1.00E+00 | 0.27  | 7.06E-01 | 9.61E-01 |
| <b>HYMAI</b>      | 0.71  | 6.66E-01 | 1.00E+00 | -0.41 | 7.06E-01 | 9.61E-01 |
| <b>IFI30</b>      | 1.63  | 3.59E-01 | 1.00E+00 | 0.31  | 7.06E-01 | 9.61E-01 |
| <b>GLRB</b>       | 0.53  | 4.46E-01 | 1.00E+00 | -0.24 | 7.06E-01 | 9.61E-01 |
| <b>SMURF2</b>     | 0.40  | 5.85E-02 | 1.00E+00 | 0.08  | 7.06E-01 | 9.61E-01 |
| <b>CA11</b>       | -0.32 | 2.88E-01 | 1.00E+00 | 0.12  | 7.06E-01 | 9.61E-01 |
| <b>CCDC24</b>     | -0.01 | 9.85E-01 | 1.00E+00 | 0.12  | 7.06E-01 | 9.61E-01 |
| <b>ARSK</b>       | 0.10  | 7.38E-01 | 1.00E+00 | 0.12  | 7.06E-01 | 9.61E-01 |
| <b>RPL7P13</b>    | 0.90  | 7.96E-01 | 1.00E+00 | 0.41  | 7.06E-01 | 9.61E-01 |
| <b>SAXO1</b>      | -0.52 | 6.17E-01 | 1.00E+00 | -0.30 | 7.06E-01 | 9.61E-01 |



|                   |        |          |          |       |          |          |
|-------------------|--------|----------|----------|-------|----------|----------|
| <b>AC107294.2</b> | 0.93   | 4.60E-01 | 1.00E+00 | -0.30 | 7.06E-01 | 9.61E-01 |
| <b>TTC16</b>      | 0.21   | 9.32E-01 | 1.00E+00 | 0.54  | 7.07E-01 | 9.61E-01 |
| <b>CAPN9</b>      | -1.03  | 2.61E-01 | 1.00E+00 | 0.35  | 7.07E-01 | 9.61E-01 |
| <b>AC122129.1</b> | 0.72   | 3.39E-01 | 1.00E+00 | -0.27 | 7.07E-01 | 9.61E-01 |
| <b>RGPD5</b>      | -0.72  | 2.59E-01 | 1.00E+00 | -0.17 | 7.07E-01 | 9.61E-01 |
| <b>EXOG</b>       | 0.36   | 4.84E-01 | 1.00E+00 | -0.11 | 7.07E-01 | 9.61E-01 |
| <b>PDK4</b>       | 1.20   | 6.06E-02 | 1.00E+00 | -0.25 | 7.07E-01 | 9.61E-01 |
| <b>AL358472.3</b> | -0.34  | 7.62E-01 | 1.00E+00 | -0.53 | 7.07E-01 | 9.61E-01 |
| <b>KRTAP10-4</b>  | -11.50 | 8.60E-04 | 1.48E-01 | -1.21 | 7.07E-01 | 9.61E-01 |
| <b>AC002550.2</b> | 1.15   | 3.49E-01 | 1.00E+00 | -0.42 | 7.07E-01 | 9.61E-01 |
| <b>AL161909.1</b> | -1.05  | 6.77E-01 | 1.00E+00 | 0.30  | 7.07E-01 | 9.61E-01 |
| <b>RGS6</b>       | 0.20   | 7.23E-01 | 1.00E+00 | -0.32 | 7.07E-01 | 9.61E-01 |
| <b>KCNJ2-AS1</b>  | -0.14  | 8.03E-01 | 1.00E+00 | -0.22 | 7.07E-01 | 9.61E-01 |
| <b>IP6K1</b>      | -0.09  | 5.34E-01 | 1.00E+00 | 0.16  | 7.07E-01 | 9.61E-01 |
| <b>SHPK</b>       | 0.04   | 8.86E-01 | 1.00E+00 | 0.08  | 7.07E-01 | 9.61E-01 |
| <b>RNF138P1</b>   | 0.85   | 8.06E-01 | 1.00E+00 | 0.49  | 7.07E-01 | 9.61E-01 |
| <b>MBD4</b>       | 0.01   | 9.48E-01 | 1.00E+00 | -0.09 | 7.07E-01 | 9.61E-01 |
| <b>TTC7A</b>      | -0.22  | 4.58E-01 | 1.00E+00 | 0.20  | 7.07E-01 | 9.61E-01 |
| <b>AL136295.6</b> | 1.11   | 1.98E-01 | 1.00E+00 | 0.26  | 7.07E-01 | 9.61E-01 |
| <b>FOXN2</b>      | 0.05   | 8.62E-01 | 1.00E+00 | 0.07  | 7.07E-01 | 9.61E-01 |
| <b>ZNF7</b>       | 0.13   | 5.94E-01 | 1.00E+00 | -0.08 | 7.07E-01 | 9.61E-01 |
| <b>RPL37</b>      | -0.14  | 6.53E-01 | 1.00E+00 | 0.10  | 7.07E-01 | 9.61E-01 |
| <b>S100A6</b>     | -0.01  | 9.82E-01 | 1.00E+00 | 0.11  | 7.08E-01 | 9.61E-01 |
| <b>RFK</b>        | 0.13   | 7.38E-01 | 1.00E+00 | -0.10 | 7.08E-01 | 9.61E-01 |
| <b>ENTPD2</b>     | -0.69  | 1.33E-02 | 7.22E-01 | 0.24  | 7.08E-01 | 9.61E-01 |
| <b>HS6ST1P1</b>   | -0.27  | 7.29E-01 | 1.00E+00 | -0.38 | 7.08E-01 | 9.61E-01 |
| <b>AC093462.1</b> | -0.05  | 9.72E-01 | 1.00E+00 | 0.43  | 7.08E-01 | 9.61E-01 |
| <b>SIGLEC12</b>   | -2.25  | 2.91E-01 | 1.00E+00 | 1.19  | 7.08E-01 | 9.61E-01 |
| <b>TP53RK</b>     | 0.14   | 5.93E-01 | 1.00E+00 | 0.10  | 7.08E-01 | 9.61E-01 |
| <b>TRAF3IP1</b>   | -0.13  | 5.84E-01 | 1.00E+00 | -0.13 | 7.08E-01 | 9.61E-01 |
| <b>F5</b>         | 0.70   | 3.39E-01 | 1.00E+00 | -0.28 | 7.08E-01 | 9.61E-01 |
| <b>LRMP</b>       | -0.10  | 8.43E-01 | 1.00E+00 | -0.14 | 7.08E-01 | 9.61E-01 |

|                    |       |          |          |       |          |          |
|--------------------|-------|----------|----------|-------|----------|----------|
| <b>EN2</b>         | 0.16  | 8.50E-01 | 1.00E+00 | -0.48 | 7.08E-01 | 9.61E-01 |
| <b>WDR20</b>       | -0.04 | 8.38E-01 | 1.00E+00 | 0.08  | 7.08E-01 | 9.61E-01 |
| <b>AF131215.6</b>  | 0.51  | 4.66E-01 | 1.00E+00 | -0.26 | 7.08E-01 | 9.61E-01 |
| <b>XLOC_007925</b> | -2.26 | 7.30E-02 | 1.00E+00 | -0.33 | 7.08E-01 | 9.61E-01 |
| <b>TRAIP</b>       | -0.20 | 3.60E-01 | 1.00E+00 | -0.12 | 7.08E-01 | 9.61E-01 |
| <b>GYPE</b>        | 0.75  | 1.83E-01 | 1.00E+00 | 0.41  | 7.08E-01 | 9.61E-01 |
| <b>COMTD1</b>      | -0.59 | 8.72E-02 | 1.00E+00 | -0.12 | 7.08E-01 | 9.61E-01 |
| <b>XLOC_005724</b> | -0.06 | 9.38E-01 | 1.00E+00 | -0.24 | 7.08E-01 | 9.61E-01 |
| <b>AC243562.2</b>  | 0.48  | 7.15E-01 | 1.00E+00 | 0.48  | 7.08E-01 | 9.61E-01 |
| <b>MATN1</b>       | 0.43  | 8.10E-01 | 1.00E+00 | -0.53 | 7.08E-01 | 9.61E-01 |
| <b>ODC1</b>        | 0.01  | 9.70E-01 | 1.00E+00 | 0.22  | 7.08E-01 | 9.61E-01 |
| <b>PHPT1</b>       | -0.13 | 5.71E-01 | 1.00E+00 | 0.12  | 7.08E-01 | 9.61E-01 |
| <b>PLOD2</b>       | 0.93  | 1.83E-01 | 1.00E+00 | -0.20 | 7.08E-01 | 9.61E-01 |
| <b>XLOC_005026</b> | -1.71 | 6.18E-01 | 1.00E+00 | -0.37 | 7.08E-01 | 9.61E-01 |
| <b>ULBP1</b>       | -2.32 | 4.15E-02 | 1.00E+00 | 0.45  | 7.08E-01 | 9.61E-01 |
| <b>MGAT5B</b>      | -1.25 | 3.61E-02 | 1.00E+00 | 0.42  | 7.08E-01 | 9.61E-01 |
| <b>S1PR4</b>       | 0.00  | 9.97E-01 | 1.00E+00 | 1.17  | 7.09E-01 | 9.61E-01 |
| <b>DHDH</b>        | -0.58 | 5.03E-01 | 1.00E+00 | -0.29 | 7.09E-01 | 9.61E-01 |
| <b>AL008721.2</b>  | 0.10  | 9.24E-01 | 1.00E+00 | -0.37 | 7.09E-01 | 9.61E-01 |
| <b>C10orf95</b>    | 0.25  | 8.34E-01 | 1.00E+00 | -0.30 | 7.09E-01 | 9.61E-01 |
| <b>AL139099.4</b>  | 0.27  | 4.86E-01 | 1.00E+00 | -0.28 | 7.09E-01 | 9.61E-01 |
| <b>LINC01123</b>   | -0.50 | 2.87E-01 | 1.00E+00 | 0.23  | 7.09E-01 | 9.61E-01 |
| <b>MAMLD1</b>      | 0.14  | 7.24E-01 | 1.00E+00 | 0.29  | 7.09E-01 | 9.61E-01 |
| <b>BEX3</b>        | 0.12  | 6.74E-01 | 1.00E+00 | 0.11  | 7.09E-01 | 9.61E-01 |
| <b>MTND6P4</b>     | -0.31 | 7.11E-01 | 1.00E+00 | -0.25 | 7.09E-01 | 9.61E-01 |
| <b>BMS1</b>        | -0.19 | 3.60E-01 | 1.00E+00 | -0.07 | 7.09E-01 | 9.61E-01 |
| <b>CYB5R4</b>      | -0.46 | 7.84E-02 | 1.00E+00 | 0.09  | 7.09E-01 | 9.61E-01 |
| <b>ZNF45</b>       | 0.37  | 2.13E-01 | 1.00E+00 | 0.13  | 7.09E-01 | 9.61E-01 |
| <b>KLF1</b>        | -1.07 | 6.76E-01 | 1.00E+00 | 0.67  | 7.09E-01 | 9.61E-01 |
| <b>WBP11</b>       | -0.10 | 5.79E-01 | 1.00E+00 | -0.05 | 7.09E-01 | 9.61E-01 |
| <b>ATP6V1F</b>     | 0.07  | 7.03E-01 | 1.00E+00 | -0.12 | 7.09E-01 | 9.61E-01 |
| <b>AC084337.1</b>  | -0.53 | 4.69E-01 | 1.00E+00 | 0.29  | 7.09E-01 | 9.61E-01 |

|            |       |          |          |       |          |          |
|------------|-------|----------|----------|-------|----------|----------|
| LINC00365  | 2.47  | 1.20E-01 | 1.00E+00 | 0.46  | 7.09E-01 | 9.61E-01 |
| HECTD3     | -0.06 | 7.56E-01 | 1.00E+00 | -0.14 | 7.10E-01 | 9.61E-01 |
| ATP6V0E2   | 0.09  | 8.60E-01 | 1.00E+00 | -0.11 | 7.10E-01 | 9.61E-01 |
| GAPDH      | -0.51 | 5.59E-02 | 1.00E+00 | 0.06  | 7.10E-01 | 9.61E-01 |
| LONP2      | -0.04 | 8.07E-01 | 1.00E+00 | -0.06 | 7.10E-01 | 9.61E-01 |
| AC133435.1 | 1.01  | 4.14E-01 | 1.00E+00 | 0.39  | 7.10E-01 | 9.61E-01 |
| AC019117.1 | -0.21 | 8.95E-01 | 1.00E+00 | 0.54  | 7.10E-01 | 9.61E-01 |
| C1orf122   | -0.09 | 8.37E-01 | 1.00E+00 | -0.13 | 7.10E-01 | 9.61E-01 |
| METRNL     | -0.37 | 3.39E-01 | 1.00E+00 | 0.28  | 7.10E-01 | 9.61E-01 |
| AL138781.1 | -0.62 | 2.40E-01 | 1.00E+00 | -0.39 | 7.10E-01 | 9.61E-01 |
| CCDC117    | 0.18  | 4.51E-01 | 1.00E+00 | -0.08 | 7.10E-01 | 9.61E-01 |
| LHCGR      | 1.17  | 2.73E-01 | 1.00E+00 | -0.39 | 7.10E-01 | 9.61E-01 |
| PTMA       | -0.06 | 7.60E-01 | 1.00E+00 | 0.07  | 7.10E-01 | 9.61E-01 |
| SWT1       | -0.01 | 9.70E-01 | 1.00E+00 | 0.13  | 7.10E-01 | 9.61E-01 |
| PPP1R14A   | 0.31  | 6.68E-01 | 1.00E+00 | -0.15 | 7.10E-01 | 9.61E-01 |
| PPHLN1     | -0.23 | 2.38E-01 | 1.00E+00 | -0.05 | 7.10E-01 | 9.61E-01 |
| AC011825.4 | -0.61 | 7.70E-01 | 1.00E+00 | 0.33  | 7.10E-01 | 9.61E-01 |
| KAT2A      | -0.09 | 7.64E-01 | 1.00E+00 | 0.16  | 7.10E-01 | 9.61E-01 |
| UPK1A-AS1  | -0.10 | 9.77E-01 | 1.00E+00 | -0.45 | 7.10E-01 | 9.61E-01 |
| MTPAP      | -0.11 | 6.67E-01 | 1.00E+00 | -0.13 | 7.10E-01 | 9.61E-01 |
| AC006538.1 | -1.03 | 2.22E-01 | 1.00E+00 | 0.48  | 7.10E-01 | 9.61E-01 |
| HDHD3      | -0.17 | 5.59E-01 | 1.00E+00 | 0.10  | 7.10E-01 | 9.61E-01 |
| TPRA1      | 0.21  | 4.22E-01 | 1.00E+00 | -0.14 | 7.10E-01 | 9.61E-01 |
| FAM210A    | 0.10  | 7.37E-01 | 1.00E+00 | -0.10 | 7.10E-01 | 9.61E-01 |
| HSP90AA5P  | 0.36  | 9.17E-01 | 1.00E+00 | -1.20 | 7.10E-01 | 9.61E-01 |
| ZBTB7B     | -0.26 | 5.01E-01 | 1.00E+00 | 0.24  | 7.10E-01 | 9.61E-01 |
| B3GALT4    | -0.25 | 3.56E-01 | 1.00E+00 | 0.07  | 7.10E-01 | 9.61E-01 |
| RASA4      | 0.02  | 9.45E-01 | 1.00E+00 | 0.19  | 7.10E-01 | 9.61E-01 |
| AC121757.1 | -1.50 | 9.06E-02 | 1.00E+00 | 0.37  | 7.10E-01 | 9.61E-01 |
| YIF1A      | -0.11 | 5.86E-01 | 1.00E+00 | 0.08  | 7.10E-01 | 9.61E-01 |
| AC099489.1 | -0.25 | 6.73E-01 | 1.00E+00 | -0.22 | 7.10E-01 | 9.61E-01 |
| G38775     | -0.62 | 5.66E-01 | 1.00E+00 | -0.30 | 7.10E-01 | 9.61E-01 |

|                    |        |          |          |       |          |          |
|--------------------|--------|----------|----------|-------|----------|----------|
| <b>CST2</b>        | -3.43  | 4.98E-02 | 1.00E+00 | 0.50  | 7.10E-01 | 9.61E-01 |
| <b>AC010186.2</b>  | -0.25  | 6.61E-01 | 1.00E+00 | 0.18  | 7.10E-01 | 9.61E-01 |
| <b>AC010980.2</b>  | -0.11  | 9.09E-01 | 1.00E+00 | 0.43  | 7.11E-01 | 9.61E-01 |
| <b>FUNDC2P1</b>    | -0.54  | 8.37E-01 | 1.00E+00 | 0.25  | 7.11E-01 | 9.61E-01 |
| <b>UBE2B</b>       | 0.21   | 3.62E-01 | 1.00E+00 | -0.11 | 7.11E-01 | 9.61E-01 |
| <b>NUP214</b>      | -0.17  | 3.88E-01 | 1.00E+00 | 0.12  | 7.11E-01 | 9.61E-01 |
| <b>PTPN3</b>       | 0.31   | 3.77E-01 | 1.00E+00 | -0.10 | 7.11E-01 | 9.61E-01 |
| <b>MSC-AS1</b>     | 1.29   | 8.11E-02 | 1.00E+00 | 0.20  | 7.11E-01 | 9.61E-01 |
| <b>ITGA10</b>      | -0.51  | 4.30E-01 | 1.00E+00 | 0.35  | 7.11E-01 | 9.61E-01 |
| <b>FOXO3</b>       | -0.62  | 2.62E-01 | 1.00E+00 | -0.41 | 7.11E-01 | 9.61E-01 |
| <b>TCF7L2</b>      | 0.15   | 7.37E-01 | 1.00E+00 | 0.13  | 7.11E-01 | 9.61E-01 |
| <b>WDR90</b>       | -0.39  | 1.96E-01 | 1.00E+00 | 0.25  | 7.11E-01 | 9.61E-01 |
| <b>CAPRN1</b>      | -0.18  | 2.58E-01 | 1.00E+00 | 0.08  | 7.11E-01 | 9.61E-01 |
| <b>AC020978.4</b>  | -0.27  | 7.50E-01 | 1.00E+00 | 0.46  | 7.11E-01 | 9.61E-01 |
| <b>G42642</b>      | 0.55   | 2.37E-01 | 1.00E+00 | -0.40 | 7.11E-01 | 9.61E-01 |
| <b>AC091429.1</b>  | 0.84   | 5.53E-01 | 1.00E+00 | -0.26 | 7.11E-01 | 9.61E-01 |
| <b>UBL4B</b>       | 0.55   | 5.84E-01 | 1.00E+00 | 1.17  | 7.11E-01 | 9.61E-01 |
| <b>AC092653.1</b>  | -0.78  | 5.82E-01 | 1.00E+00 | 0.57  | 7.11E-01 | 9.61E-01 |
| <b>F3</b>          | 0.09   | 8.54E-01 | 1.00E+00 | 0.13  | 7.11E-01 | 9.61E-01 |
| <b>GHET1</b>       | 0.00   | 9.99E-01 | 1.00E+00 | -0.41 | 7.11E-01 | 9.61E-01 |
| <b>APCDD1L-DT</b>  | -0.14  | 7.24E-01 | 1.00E+00 | -0.19 | 7.11E-01 | 9.61E-01 |
| <b>XLOC_005715</b> | -0.36  | 7.32E-01 | 1.00E+00 | -0.46 | 7.11E-01 | 9.61E-01 |
| <b>CUTA</b>        | -0.22  | 2.81E-01 | 1.00E+00 | -0.09 | 7.11E-01 | 9.61E-01 |
| <b>FAM83B</b>      | -0.44  | 3.91E-01 | 1.00E+00 | -0.25 | 7.11E-01 | 9.61E-01 |
| <b>AL606491.1</b>  | -3.46  | 5.43E-02 | 1.00E+00 | -0.24 | 7.11E-01 | 9.61E-01 |
| <b>BTBD11</b>      | -0.45  | 1.63E-01 | 1.00E+00 | -0.19 | 7.11E-01 | 9.61E-01 |
| <b>ATF4P3</b>      | 0.03   | 9.84E-01 | 1.00E+00 | 0.20  | 7.11E-01 | 9.61E-01 |
| <b>TRAPPC2L</b>    | -0.12  | 5.60E-01 | 1.00E+00 | -0.09 | 7.12E-01 | 9.61E-01 |
| <b>USP15</b>       | -0.12  | 7.16E-01 | 1.00E+00 | -0.10 | 7.12E-01 | 9.61E-01 |
| <b>FBXO45</b>      | 0.27   | 4.90E-01 | 1.00E+00 | 0.12  | 7.12E-01 | 9.61E-01 |
| <b>KRTAP9-8</b>    | -12.32 | 3.28E-04 | 7.05E-02 | -1.19 | 7.12E-01 | 9.61E-01 |
| <b>PDSS1</b>       | -0.51  | 2.09E-01 | 1.00E+00 | 0.23  | 7.12E-01 | 9.61E-01 |

|            |       |          |          |       |          |          |
|------------|-------|----------|----------|-------|----------|----------|
| ZNF229     | 0.28  | 5.38E-01 | 1.00E+00 | -0.22 | 7.12E-01 | 9.61E-01 |
| ZFP90      | -0.02 | 9.50E-01 | 1.00E+00 | 0.12  | 7.12E-01 | 9.61E-01 |
| CABCOCO1   | 0.48  | 6.68E-01 | 1.00E+00 | 0.33  | 7.12E-01 | 9.61E-01 |
| FAM114A1   | 0.06  | 8.52E-01 | 1.00E+00 | 0.09  | 7.12E-01 | 9.61E-01 |
| SDC2       | 0.49  | 1.89E-01 | 1.00E+00 | -0.15 | 7.12E-01 | 9.61E-01 |
| RBM39      | -0.12 | 6.80E-01 | 1.00E+00 | 0.06  | 7.12E-01 | 9.61E-01 |
| PRPSAP1    | -0.17 | 5.00E-01 | 1.00E+00 | -0.07 | 7.12E-01 | 9.61E-01 |
| KIAA1671   | -0.18 | 2.81E-01 | 1.00E+00 | 0.14  | 7.12E-01 | 9.61E-01 |
| AC090651.1 | 0.90  | 7.96E-01 | 1.00E+00 | -0.66 | 7.12E-01 | 9.61E-01 |
| AC012186.2 | -2.87 | 3.96E-01 | 1.00E+00 | -0.36 | 7.12E-01 | 9.61E-01 |
| MAK        | -1.45 | 1.43E-01 | 1.00E+00 | 0.23  | 7.12E-01 | 9.61E-01 |
| TUSC3      | -0.12 | 7.68E-01 | 1.00E+00 | 0.20  | 7.12E-01 | 9.61E-01 |
| EIF5AP4    | -1.17 | 3.90E-01 | 1.00E+00 | -0.21 | 7.12E-01 | 9.61E-01 |
| ZKSCAN5    | -0.01 | 9.63E-01 | 1.00E+00 | 0.18  | 7.12E-01 | 9.61E-01 |
| RUVBL1     | -0.21 | 3.33E-01 | 1.00E+00 | 0.07  | 7.12E-01 | 9.61E-01 |
| RAB33A     | -0.80 | 2.63E-01 | 1.00E+00 | 0.24  | 7.12E-01 | 9.61E-01 |
| G11279     | -2.35 | 2.81E-01 | 1.00E+00 | 0.48  | 7.12E-01 | 9.61E-01 |
| TBC1D20    | 0.05  | 7.67E-01 | 1.00E+00 | -0.15 | 7.12E-01 | 9.61E-01 |
| RBM34      | -0.05 | 9.66E-01 | 1.00E+00 | -0.16 | 7.12E-01 | 9.61E-01 |
| NDST3      | -2.08 | 1.87E-01 | 1.00E+00 | 0.38  | 7.12E-01 | 9.61E-01 |
| AC016735.1 | -2.18 | 1.82E-01 | 1.00E+00 | -0.35 | 7.13E-01 | 9.61E-01 |
| GAPDHP40   | -1.19 | 7.32E-01 | 1.00E+00 | 0.22  | 7.13E-01 | 9.61E-01 |
| FTH1P8     | -0.02 | 9.88E-01 | 1.00E+00 | -0.24 | 7.13E-01 | 9.61E-01 |
| IRX2       | -0.34 | 1.49E-01 | 1.00E+00 | -0.22 | 7.13E-01 | 9.61E-01 |
| AP001363.2 | -0.91 | 4.09E-01 | 1.00E+00 | 0.24  | 7.13E-01 | 9.61E-01 |
| UBIAD1     | -0.01 | 9.84E-01 | 1.00E+00 | -0.10 | 7.13E-01 | 9.61E-01 |
| PRKCD      | 0.23  | 2.74E-01 | 1.00E+00 | -0.19 | 7.13E-01 | 9.61E-01 |
| RSAD1      | 0.03  | 8.73E-01 | 1.00E+00 | -0.12 | 7.13E-01 | 9.61E-01 |
| CD8B2      | 1.44  | 3.73E-03 | 3.33E-01 | -0.27 | 7.13E-01 | 9.61E-01 |
| AL096711.2 | 2.26  | 3.89E-01 | 1.00E+00 | -0.61 | 7.13E-01 | 9.61E-01 |
| ARHGAP1    | -0.18 | 4.23E-01 | 1.00E+00 | 0.10  | 7.13E-01 | 9.61E-01 |
| AC011352.3 | 0.24  | 5.98E-01 | 1.00E+00 | -0.20 | 7.13E-01 | 9.61E-01 |

|                    |       |          |          |       |          |          |
|--------------------|-------|----------|----------|-------|----------|----------|
| <b>AC011472.2</b>  | -0.15 | 8.60E-01 | 1.00E+00 | -0.19 | 7.13E-01 | 9.61E-01 |
| <b>LINC01230</b>   | 2.23  | 4.92E-01 | 1.00E+00 | -1.17 | 7.13E-01 | 9.61E-01 |
| <b>PDRG1</b>       | 0.15  | 5.01E-01 | 1.00E+00 | 0.09  | 7.13E-01 | 9.61E-01 |
| <b>AC009086.3</b>  | -0.85 | 1.83E-01 | 1.00E+00 | -0.22 | 7.13E-01 | 9.61E-01 |
| <b>SERF1A</b>      | 1.27  | 5.89E-01 | 1.00E+00 | -0.31 | 7.13E-01 | 9.61E-01 |
| <b>TOLLIP-AS1</b>  | -0.95 | 4.30E-02 | 1.00E+00 | -0.17 | 7.13E-01 | 9.61E-01 |
| <b>TUT4</b>        | 0.09  | 6.63E-01 | 1.00E+00 | -0.10 | 7.13E-01 | 9.61E-01 |
| <b>ZFPL1</b>       | -0.21 | 6.16E-01 | 1.00E+00 | 0.17  | 7.13E-01 | 9.61E-01 |
| <b>DPY19L2</b>     | -0.13 | 8.33E-01 | 1.00E+00 | 0.28  | 7.13E-01 | 9.61E-01 |
| <b>ODF2</b>        | -0.32 | 1.15E-01 | 1.00E+00 | -0.08 | 7.13E-01 | 9.61E-01 |
| <b>NMRAL2P</b>     | 0.55  | 3.72E-01 | 1.00E+00 | -0.20 | 7.13E-01 | 9.61E-01 |
| <b>USP31</b>       | -0.09 | 6.43E-01 | 1.00E+00 | 0.12  | 7.13E-01 | 9.61E-01 |
| <b>LEPROT</b>      | 0.44  | 7.86E-02 | 1.00E+00 | -0.08 | 7.13E-01 | 9.61E-01 |
| <b>AC139887.4</b>  | -0.62 | 6.72E-01 | 1.00E+00 | 0.30  | 7.13E-01 | 9.61E-01 |
| <b>CHAC2</b>       | -0.54 | 2.17E-01 | 1.00E+00 | -0.13 | 7.13E-01 | 9.61E-01 |
| <b>MTHFS</b>       | 2.75  | 7.15E-02 | 1.00E+00 | -0.25 | 7.14E-01 | 9.61E-01 |
| <b>AC004982.2</b>  | 0.62  | 5.02E-01 | 1.00E+00 | -0.20 | 7.14E-01 | 9.61E-01 |
| <b>AL139095.2</b>  | 0.59  | 6.80E-01 | 1.00E+00 | 0.21  | 7.14E-01 | 9.61E-01 |
| <b>AL357054.3</b>  | -2.70 | 4.27E-01 | 1.00E+00 | -0.68 | 7.14E-01 | 9.61E-01 |
| <b>C7orf25</b>     | 0.18  | 8.90E-01 | 1.00E+00 | -0.19 | 7.14E-01 | 9.61E-01 |
| <b>TRIM59</b>      | 0.55  | 1.15E-01 | 1.00E+00 | 0.21  | 7.14E-01 | 9.61E-01 |
| <b>FBXW5</b>       | -0.23 | 2.57E-01 | 1.00E+00 | 0.14  | 7.14E-01 | 9.61E-01 |
| <b>TTC39B</b>      | 0.28  | 4.79E-01 | 1.00E+00 | 0.14  | 7.14E-01 | 9.61E-01 |
| <b>STIL</b>        | -0.14 | 6.90E-01 | 1.00E+00 | 0.20  | 7.14E-01 | 9.61E-01 |
| <b>RPS12</b>       | -0.06 | 8.19E-01 | 1.00E+00 | 0.10  | 7.14E-01 | 9.61E-01 |
| <b>PKP1</b>        | -0.05 | 9.23E-01 | 1.00E+00 | 0.22  | 7.14E-01 | 9.61E-01 |
| <b>ST3GAL6-AS1</b> | -0.04 | 9.68E-01 | 1.00E+00 | 0.28  | 7.14E-01 | 9.61E-01 |
| <b>ANP32B</b>      | 0.10  | 5.56E-01 | 1.00E+00 | 0.09  | 7.14E-01 | 9.61E-01 |
| <b>CXorf56</b>     | 0.09  | 5.91E-01 | 1.00E+00 | -0.07 | 7.14E-01 | 9.61E-01 |
| <b>ABHD17C</b>     | 0.13  | 5.46E-01 | 1.00E+00 | -0.22 | 7.14E-01 | 9.61E-01 |
| <b>DNASE1L2</b>    | -0.05 | 9.42E-01 | 1.00E+00 | 0.25  | 7.14E-01 | 9.61E-01 |
| <b>ASTN2</b>       | -0.18 | 7.32E-01 | 1.00E+00 | 0.20  | 7.14E-01 | 9.61E-01 |

|                   |       |          |          |       |          |          |
|-------------------|-------|----------|----------|-------|----------|----------|
| <b>PDE2A</b>      | 0.31  | 4.83E-01 | 1.00E+00 | 0.27  | 7.14E-01 | 9.61E-01 |
| <b>AC015726.1</b> | 0.01  | 9.93E-01 | 1.00E+00 | -0.29 | 7.14E-01 | 9.61E-01 |
| <b>LPAR3</b>      | 0.20  | 5.73E-01 | 1.00E+00 | -0.24 | 7.14E-01 | 9.61E-01 |
| <b>GATA6</b>      | -0.36 | 4.24E-01 | 1.00E+00 | 0.22  | 7.14E-01 | 9.61E-01 |
| <b>SUFU</b>       | -0.17 | 4.85E-01 | 1.00E+00 | 0.13  | 7.14E-01 | 9.61E-01 |
| <b>LINC01176</b>  | 0.93  | 2.94E-01 | 1.00E+00 | 0.24  | 7.14E-01 | 9.61E-01 |
| <b>ZXDB</b>       | 0.03  | 9.21E-01 | 1.00E+00 | -0.14 | 7.14E-01 | 9.61E-01 |
| <b>ANAPC11</b>    | -0.06 | 7.32E-01 | 1.00E+00 | -0.09 | 7.14E-01 | 9.61E-01 |
| <b>PRPS2</b>      | -0.06 | 8.18E-01 | 1.00E+00 | 0.07  | 7.14E-01 | 9.61E-01 |
| <b>EPB41</b>      | 0.10  | 7.52E-01 | 1.00E+00 | -0.11 | 7.14E-01 | 9.61E-01 |
| <b>RPS13</b>      | -0.05 | 8.59E-01 | 1.00E+00 | 0.11  | 7.15E-01 | 9.61E-01 |
| <b>RSPH9</b>      | 0.11  | 8.70E-01 | 1.00E+00 | 0.17  | 7.15E-01 | 9.61E-01 |
| <b>AC079203.1</b> | 1.77  | 4.24E-01 | 1.00E+00 | -0.41 | 7.15E-01 | 9.61E-01 |
| <b>UNC45A</b>     | -0.08 | 7.05E-01 | 1.00E+00 | 0.10  | 7.15E-01 | 9.61E-01 |
| <b>HPCAL1</b>     | -0.29 | 2.50E-01 | 1.00E+00 | 0.17  | 7.15E-01 | 9.61E-01 |
| <b>DGKE</b>       | 0.14  | 7.48E-01 | 1.00E+00 | 0.18  | 7.15E-01 | 9.61E-01 |
| <b>GADD45G</b>    | -0.54 | 3.25E-01 | 1.00E+00 | 0.35  | 7.15E-01 | 9.61E-01 |
| <b>GLYATL1B</b>   | -1.09 | 7.51E-01 | 1.00E+00 | 0.66  | 7.15E-01 | 9.61E-01 |
| <b>LARP4B</b>     | -0.01 | 9.83E-01 | 1.00E+00 | 0.09  | 7.15E-01 | 9.61E-01 |
| <b>LCOR</b>       | 0.04  | 8.46E-01 | 1.00E+00 | 0.08  | 7.15E-01 | 9.61E-01 |
| <b>AGAP7P</b>     | 1.57  | 1.92E-01 | 1.00E+00 | 0.35  | 7.15E-01 | 9.61E-01 |
| <b>NHS</b>        | -0.34 | 2.49E-01 | 1.00E+00 | 0.21  | 7.15E-01 | 9.61E-01 |
| <b>NDUFB11</b>    | 0.08  | 6.71E-01 | 1.00E+00 | -0.09 | 7.15E-01 | 9.61E-01 |
| <b>G5482</b>      | 0.52  | 4.82E-01 | 1.00E+00 | -0.32 | 7.15E-01 | 9.61E-01 |
| <b>PSMC6</b>      | 0.21  | 4.06E-01 | 1.00E+00 | -0.08 | 7.15E-01 | 9.61E-01 |
| <b>RPSAP5A</b>    | -1.46 | 2.43E-01 | 1.00E+00 | -0.24 | 7.15E-01 | 9.61E-01 |
| <b>ZNF286A</b>    | 0.44  | 1.21E-01 | 1.00E+00 | -0.10 | 7.15E-01 | 9.61E-01 |
| <b>C9orf64</b>    | 0.39  | 2.19E-01 | 1.00E+00 | 0.13  | 7.15E-01 | 9.61E-01 |
| <b>CCDC125</b>    | -0.51 | 4.54E-02 | 1.00E+00 | 0.09  | 7.15E-01 | 9.61E-01 |
| <b>ACTRT3</b>     | 0.07  | 8.76E-01 | 1.00E+00 | 0.22  | 7.15E-01 | 9.61E-01 |
| <b>BX679664.1</b> | -0.39 | 9.10E-01 | 1.00E+00 | 0.27  | 7.15E-01 | 9.61E-01 |
| <b>CLPX</b>       | -0.05 | 8.80E-01 | 1.00E+00 | 0.08  | 7.16E-01 | 9.61E-01 |

|                   |        |          |          |       |          |          |
|-------------------|--------|----------|----------|-------|----------|----------|
| <b>KRT16P6</b>    | -0.52  | 5.40E-01 | 1.00E+00 | -0.25 | 7.16E-01 | 9.61E-01 |
| <b>RNF130</b>     | 0.18   | 6.58E-01 | 1.00E+00 | 0.12  | 7.16E-01 | 9.61E-01 |
| <b>TRAFD1</b>     | -0.19  | 4.52E-01 | 1.00E+00 | 0.07  | 7.16E-01 | 9.61E-01 |
| <b>ATP5F1AP2</b>  | -0.56  | 8.73E-01 | 1.00E+00 | 0.26  | 7.16E-01 | 9.61E-01 |
| <b>MIDN</b>       | -1.09  | 7.81E-02 | 1.00E+00 | 0.21  | 7.16E-01 | 9.61E-01 |
| <b>FAM53A</b>     | -0.05  | 9.15E-01 | 1.00E+00 | -0.23 | 7.16E-01 | 9.61E-01 |
| <b>AL136295.2</b> | -2.27  | 4.38E-01 | 1.00E+00 | -0.30 | 7.16E-01 | 9.61E-01 |
| <b>ANKRD36C</b>   | 0.69   | 5.14E-02 | 1.00E+00 | -0.14 | 7.16E-01 | 9.61E-01 |
| <b>AC022893.1</b> | 0.15   | 8.03E-01 | 1.00E+00 | 0.23  | 7.16E-01 | 9.61E-01 |
| <b>IGHJ3</b>      | NA     | NA       | NA       | 1.17  | 7.16E-01 | 9.61E-01 |
| <b>ASB13</b>      | -0.07  | 7.78E-01 | 1.00E+00 | 0.11  | 7.16E-01 | 9.61E-01 |
| <b>PPIC</b>       | 0.16   | 7.06E-01 | 1.00E+00 | 0.11  | 7.16E-01 | 9.61E-01 |
| <b>G38643</b>     | -0.17  | 9.61E-01 | 1.00E+00 | -0.43 | 7.16E-01 | 9.61E-01 |
| <b>HDAC10</b>     | 0.28   | 8.40E-01 | 1.00E+00 | -0.16 | 7.16E-01 | 9.61E-01 |
| <b>SAT2</b>       | 0.21   | 4.00E-01 | 1.00E+00 | -0.08 | 7.16E-01 | 9.61E-01 |
| <b>KRTAP2-1</b>   | -30.00 | 4.49E-18 | 5.54E-15 | -1.17 | 7.16E-01 | 9.61E-01 |
| <b>FBXO17</b>     | 0.16   | 5.63E-01 | 1.00E+00 | -0.10 | 7.16E-01 | 9.61E-01 |
| <b>ZNF777</b>     | -0.53  | 7.02E-02 | 1.00E+00 | -1.14 | 7.16E-01 | 9.61E-01 |
| <b>AC093627.7</b> | -1.88  | 2.50E-01 | 1.00E+00 | 0.60  | 7.16E-01 | 9.61E-01 |
| <b>SIPA1L3</b>    | -0.33  | 2.79E-01 | 1.00E+00 | 0.22  | 7.16E-01 | 9.61E-01 |
| <b>TCAF1</b>      | 0.18   | 3.83E-01 | 1.00E+00 | 0.12  | 7.16E-01 | 9.61E-01 |
| <b>INHBE</b>      | -0.32  | 7.04E-01 | 1.00E+00 | 0.42  | 7.16E-01 | 9.61E-01 |
| <b>SOCS3</b>      | -3.02  | 2.12E-02 | 8.94E-01 | -0.31 | 7.16E-01 | 9.61E-01 |
| <b>AL354718.1</b> | -0.30  | 6.76E-01 | 1.00E+00 | 0.23  | 7.16E-01 | 9.61E-01 |
| <b>TMEM120B</b>   | 0.34   | 4.40E-01 | 1.00E+00 | -0.20 | 7.16E-01 | 9.61E-01 |
| <b>AC009237.8</b> | -0.97  | 6.15E-01 | 1.00E+00 | 0.39  | 7.17E-01 | 9.61E-01 |
| <b>SCG3</b>       | -0.19  | 9.38E-01 | 1.00E+00 | 0.53  | 7.17E-01 | 9.61E-01 |
| <b>KRT78</b>      | -0.15  | 8.12E-01 | 1.00E+00 | 0.25  | 7.17E-01 | 9.61E-01 |
| <b>ABRACL</b>     | -0.09  | 7.25E-01 | 1.00E+00 | -0.12 | 7.17E-01 | 9.61E-01 |
| <b>TP53I11</b>    | -0.15  | 5.66E-01 | 1.00E+00 | 0.17  | 7.17E-01 | 9.61E-01 |
| <b>AL161935.3</b> | 1.26   | 1.78E-01 | 1.00E+00 | -0.31 | 7.17E-01 | 9.61E-01 |
| <b>RPRM</b>       | -1.70  | 2.18E-03 | 2.39E-01 | 0.24  | 7.17E-01 | 9.61E-01 |



|            |       |          |          |       |          |          |
|------------|-------|----------|----------|-------|----------|----------|
| TMX1       | 0.11  | 7.13E-01 | 1.00E+00 | -0.11 | 7.17E-01 | 9.61E-01 |
| ZNF44      | 0.17  | 5.54E-01 | 1.00E+00 | 0.08  | 7.17E-01 | 9.61E-01 |
| CDC42BPA   | 0.19  | 5.61E-01 | 1.00E+00 | 0.12  | 7.17E-01 | 9.61E-01 |
| WDR73      | -0.19 | 7.39E-01 | 1.00E+00 | -0.12 | 7.17E-01 | 9.61E-01 |
| LINC02569  | 1.63  | 2.06E-01 | 1.00E+00 | 0.33  | 7.17E-01 | 9.61E-01 |
| POLR1B     | 0.04  | 8.52E-01 | 1.00E+00 | -0.08 | 7.17E-01 | 9.61E-01 |
| SOWAHB     | 0.10  | 8.39E-01 | 1.00E+00 | -0.89 | 7.17E-01 | 9.61E-01 |
| DENND5B    | -0.11 | 7.88E-01 | 1.00E+00 | 0.20  | 7.17E-01 | 9.61E-01 |
| LINC00680  | -0.13 | 7.74E-01 | 1.00E+00 | 0.11  | 7.17E-01 | 9.61E-01 |
| TSEN54     | -0.25 | 3.84E-01 | 1.00E+00 | 0.08  | 7.17E-01 | 9.61E-01 |
| GACAT2     | -1.98 | 4.38E-01 | 1.00E+00 | -0.38 | 7.17E-01 | 9.61E-01 |
| AC009171.2 | 0.87  | 3.95E-01 | 1.00E+00 | -0.17 | 7.17E-01 | 9.61E-01 |
| AL512625.1 | -0.22 | 7.26E-01 | 1.00E+00 | -0.16 | 7.17E-01 | 9.61E-01 |
| PRKDC      | -0.29 | 1.33E-01 | 1.00E+00 | 0.11  | 7.17E-01 | 9.61E-01 |
| ZNF527     | 0.07  | 8.21E-01 | 1.00E+00 | -0.11 | 7.17E-01 | 9.61E-01 |
| MRPS18A    | -0.02 | 9.40E-01 | 1.00E+00 | 0.12  | 7.17E-01 | 9.61E-01 |
| MRPL44     | -0.13 | 4.32E-01 | 1.00E+00 | 0.05  | 7.17E-01 | 9.61E-01 |
| MPV17      | -0.10 | 6.42E-01 | 1.00E+00 | -0.07 | 7.18E-01 | 9.61E-01 |
| AC092828.1 | 0.27  | 8.83E-01 | 1.00E+00 | -0.42 | 7.18E-01 | 9.61E-01 |
| UCA1       | -2.56 | 6.28E-02 | 1.00E+00 | 0.37  | 7.18E-01 | 9.61E-01 |
| HCG18      | -0.26 | 3.15E-01 | 1.00E+00 | 0.06  | 7.18E-01 | 9.61E-01 |
| MRPL16     | 0.03  | 8.72E-01 | 1.00E+00 | -0.08 | 7.18E-01 | 9.61E-01 |
| CLEC1B     | NA    | NA       | NA       | 0.50  | 7.18E-01 | 9.61E-01 |
| IER5       | -0.53 | 1.92E-01 | 1.00E+00 | 0.23  | 7.18E-01 | 9.61E-01 |
| PIWIL4     | 0.75  | 1.19E-01 | 1.00E+00 | -0.35 | 7.18E-01 | 9.62E-01 |
| TMED5      | 0.15  | 5.97E-01 | 1.00E+00 | -0.10 | 7.18E-01 | 9.62E-01 |
| AC009630.1 | 2.41  | 3.29E-01 | 1.00E+00 | -0.36 | 7.18E-01 | 9.62E-01 |
| PPP3CC     | -0.59 | 2.52E-02 | 9.28E-01 | -0.16 | 7.18E-01 | 9.62E-01 |
| BPGM       | 0.09  | 6.69E-01 | 1.00E+00 | 0.09  | 7.18E-01 | 9.62E-01 |
| ZNF519     | -0.43 | 4.86E-01 | 1.00E+00 | 0.16  | 7.18E-01 | 9.62E-01 |
| VWA8       | 0.05  | 8.94E-01 | 1.00E+00 | 0.16  | 7.18E-01 | 9.62E-01 |
| MTRF1L     | -0.08 | 7.61E-01 | 1.00E+00 | -0.05 | 7.18E-01 | 9.62E-01 |

|                     |       |          |          |       |          |          |
|---------------------|-------|----------|----------|-------|----------|----------|
| <b>HOMER2</b>       | 0.02  | 9.66E-01 | 1.00E+00 | -0.19 | 7.19E-01 | 9.62E-01 |
| <b>RPL32P3</b>      | 0.70  | 2.74E-02 | 9.66E-01 | 0.10  | 7.19E-01 | 9.62E-01 |
| <b>AGO3</b>         | 0.19  | 5.14E-01 | 1.00E+00 | -0.09 | 7.19E-01 | 9.62E-01 |
| <b>TRAPPC1</b>      | -0.22 | 3.37E-01 | 1.00E+00 | 0.11  | 7.19E-01 | 9.62E-01 |
| <b>GPR17</b>        | -0.56 | 3.68E-01 | 1.00E+00 | 0.38  | 7.19E-01 | 9.62E-01 |
| <b>HIST1H2AC</b>    | 0.12  | 8.14E-01 | 1.00E+00 | 0.11  | 7.19E-01 | 9.62E-01 |
| <b>C14orf93</b>     | -0.15 | 4.76E-01 | 1.00E+00 | -0.11 | 7.19E-01 | 9.62E-01 |
| <b>ELOVL1</b>       | 0.30  | 4.80E-01 | 1.00E+00 | 0.09  | 7.19E-01 | 9.62E-01 |
| <b>JPT2</b>         | 0.08  | 6.89E-01 | 1.00E+00 | 0.10  | 7.19E-01 | 9.62E-01 |
| <b>RPL7P19</b>      | 0.65  | 8.50E-01 | 1.00E+00 | 0.33  | 7.19E-01 | 9.62E-01 |
| <b>PARM1</b>        | 0.19  | 5.40E-01 | 1.00E+00 | -0.16 | 7.19E-01 | 9.62E-01 |
| <b>LCE1A</b>        | 0.53  | 4.88E-01 | 1.00E+00 | 0.30  | 7.19E-01 | 9.62E-01 |
| <b>CYHR1</b>        | -0.26 | 2.79E-01 | 1.00E+00 | -0.09 | 7.19E-01 | 9.62E-01 |
| <b>PLAT</b>         | 0.05  | 9.33E-01 | 1.00E+00 | 0.17  | 7.19E-01 | 9.62E-01 |
| <b>RPL17P34</b>     | -0.54 | 7.99E-01 | 1.00E+00 | -0.28 | 7.19E-01 | 9.62E-01 |
| <b>AKT1S1</b>       | -0.19 | 4.84E-01 | 1.00E+00 | 0.19  | 7.19E-01 | 9.62E-01 |
| <b>AL137784.3</b>   | 0.91  | 3.92E-01 | 1.00E+00 | 0.41  | 7.19E-01 | 9.62E-01 |
| <b>OAZ1</b>         | -0.02 | 8.58E-01 | 1.00E+00 | 0.08  | 7.19E-01 | 9.62E-01 |
| <b>TTF1</b>         | 0.11  | 5.59E-01 | 1.00E+00 | 0.09  | 7.19E-01 | 9.62E-01 |
| <b>RAB11FIP4</b>    | -0.04 | 9.17E-01 | 1.00E+00 | 0.19  | 7.19E-01 | 9.62E-01 |
| <b>RRM2B</b>        | 0.29  | 2.78E-01 | 1.00E+00 | 0.06  | 7.19E-01 | 9.62E-01 |
| <b>NOC4L</b>        | -0.25 | 3.85E-01 | 1.00E+00 | 0.09  | 7.20E-01 | 9.62E-01 |
| <b>AC005921.3</b>   | 0.54  | 8.76E-01 | 1.00E+00 | -0.44 | 7.20E-01 | 9.62E-01 |
| <b>EPHA7</b>        | 0.65  | 3.22E-01 | 1.00E+00 | -0.33 | 7.20E-01 | 9.62E-01 |
| <b>AL450344.3</b>   | -0.67 | 8.47E-01 | 1.00E+00 | -0.51 | 7.20E-01 | 9.62E-01 |
| <b>ADAMTSL4-AS1</b> | 0.32  | 7.40E-01 | 1.00E+00 | 0.26  | 7.20E-01 | 9.62E-01 |
| <b>AL139274.1</b>   | NA    | NA       | NA       | 0.74  | 7.20E-01 | 9.62E-01 |
| <b>FGD1</b>         | -0.14 | 4.25E-01 | 1.00E+00 | 0.15  | 7.20E-01 | 9.62E-01 |
| <b>RUNDC1</b>       | -0.16 | 3.94E-01 | 1.00E+00 | -0.16 | 7.20E-01 | 9.62E-01 |
| <b>ESPNL</b>        | 0.90  | 3.69E-02 | 1.00E+00 | 0.50  | 7.20E-01 | 9.62E-01 |
| <b>PAQR8</b>        | 0.04  | 8.90E-01 | 1.00E+00 | 0.16  | 7.20E-01 | 9.62E-01 |
| <b>AC026403.1</b>   | 0.48  | 2.78E-01 | 1.00E+00 | 0.27  | 7.20E-01 | 9.62E-01 |

|                   |        |          |          |       |          |          |
|-------------------|--------|----------|----------|-------|----------|----------|
| <b>C8orf89</b>    | -1.69  | 3.26E-01 | 1.00E+00 | 0.29  | 7.20E-01 | 9.62E-01 |
| <b>NDFIP2</b>     | 0.14   | 7.37E-01 | 1.00E+00 | -0.16 | 7.20E-01 | 9.62E-01 |
| <b>NINJ2</b>      | 0.22   | 5.77E-01 | 1.00E+00 | -0.14 | 7.20E-01 | 9.62E-01 |
| <b>NBPF1</b>      | -0.40  | 3.65E-01 | 1.00E+00 | -0.13 | 7.20E-01 | 9.62E-01 |
| <b>DGUOK</b>      | 0.12   | 5.53E-01 | 1.00E+00 | -0.13 | 7.20E-01 | 9.62E-01 |
| <b>BLVRB</b>      | -0.04  | 8.08E-01 | 1.00E+00 | 0.06  | 7.20E-01 | 9.62E-01 |
| <b>GDF7</b>       | -0.36  | 6.14E-01 | 1.00E+00 | 0.22  | 7.20E-01 | 9.62E-01 |
| <b>AC114491.1</b> | -0.60  | 8.18E-01 | 1.00E+00 | -0.29 | 7.20E-01 | 9.62E-01 |
| <b>SLC7A6OS</b>   | -0.06  | 8.10E-01 | 1.00E+00 | 0.13  | 7.20E-01 | 9.62E-01 |
| <b>STT3A</b>      | 0.20   | 4.73E-01 | 1.00E+00 | 0.09  | 7.20E-01 | 9.62E-01 |
| <b>EDN3</b>       | -0.86  | 3.19E-01 | 1.00E+00 | 0.92  | 7.20E-01 | 9.62E-01 |
| <b>MYO6</b>       | 0.13   | 5.83E-01 | 1.00E+00 | -0.06 | 7.20E-01 | 9.62E-01 |
| <b>AL008727.1</b> | 1.07   | 6.53E-01 | 1.00E+00 | 0.47  | 7.20E-01 | 9.62E-01 |
| <b>AC068050.1</b> | -0.58  | 8.67E-01 | 1.00E+00 | 0.53  | 7.20E-01 | 9.62E-01 |
| <b>LINC01948</b>  | -1.23  | 2.88E-01 | 1.00E+00 | -0.22 | 7.20E-01 | 9.62E-01 |
| <b>LINC01619</b>  | -0.04  | 9.34E-01 | 1.00E+00 | -0.23 | 7.21E-01 | 9.62E-01 |
| <b>AC090114.1</b> | 0.00   | 1.00E+00 | 1.00E+00 | 0.32  | 7.21E-01 | 9.62E-01 |
| <b>AC133041.1</b> | -2.35  | 1.64E-01 | 1.00E+00 | 0.37  | 7.21E-01 | 9.62E-01 |
| <b>AC020765.2</b> | NA     | NA       | NA       | -0.39 | 7.21E-01 | 9.62E-01 |
| <b>TIMM13</b>     | 0.01   | 9.58E-01 | 1.00E+00 | -0.09 | 7.21E-01 | 9.62E-01 |
| <b>GUCA1A</b>     | -3.43  | 1.65E-01 | 1.00E+00 | 0.51  | 7.21E-01 | 9.62E-01 |
| <b>FRMPD4</b>     | -1.89  | 1.01E-01 | 1.00E+00 | 0.61  | 7.21E-01 | 9.62E-01 |
| <b>AC073389.3</b> | -0.75  | 4.71E-01 | 1.00E+00 | 0.27  | 7.21E-01 | 9.62E-01 |
| <b>CDH10</b>      | 2.75   | 4.39E-02 | 1.00E+00 | 1.13  | 7.21E-01 | 9.62E-01 |
| <b>C6orf132</b>   | -0.31  | 4.25E-01 | 1.00E+00 | 0.17  | 7.21E-01 | 9.62E-01 |
| <b>AL109741.2</b> | 0.36   | 9.17E-01 | 1.00E+00 | 0.19  | 7.21E-01 | 9.62E-01 |
| <b>ACOT13</b>     | -0.14  | 6.22E-01 | 1.00E+00 | 0.12  | 7.21E-01 | 9.62E-01 |
| <b>LINC01503</b>  | 0.22   | 6.99E-01 | 1.00E+00 | -0.13 | 7.21E-01 | 9.62E-01 |
| <b>KRTAP4-2</b>   | -19.13 | 2.43E-08 | 1.12E-05 | -1.04 | 7.21E-01 | 9.62E-01 |
| <b>HES2</b>       | -0.48  | 2.12E-01 | 1.00E+00 | 0.21  | 7.21E-01 | 9.62E-01 |
| <b>NPR3</b>       | -0.14  | 6.55E-01 | 1.00E+00 | -0.16 | 7.21E-01 | 9.62E-01 |
| <b>HIF3A</b>      | 1.32   | 1.76E-02 | 8.33E-01 | -0.26 | 7.21E-01 | 9.62E-01 |

|             |       |          |          |       |          |          |
|-------------|-------|----------|----------|-------|----------|----------|
| MND1        | -0.25 | 6.08E-01 | 1.00E+00 | -0.17 | 7.21E-01 | 9.62E-01 |
| SYNC        | -0.60 | 1.98E-01 | 1.00E+00 | -0.26 | 7.22E-01 | 9.62E-01 |
| AL731557.1  | 1.48  | 1.90E-01 | 1.00E+00 | 0.39  | 7.22E-01 | 9.62E-01 |
| RXFP1       | -0.33 | 8.23E-01 | 1.00E+00 | 1.13  | 7.22E-01 | 9.62E-01 |
| UBE2L3      | -0.04 | 7.75E-01 | 1.00E+00 | -0.05 | 7.22E-01 | 9.62E-01 |
| PRPF8       | -0.13 | 5.49E-01 | 1.00E+00 | -0.12 | 7.22E-01 | 9.62E-01 |
| WFDC1       | -0.95 | 1.27E-01 | 1.00E+00 | -0.29 | 7.22E-01 | 9.62E-01 |
| ZNF264      | 0.26  | 2.11E-01 | 1.00E+00 | 0.12  | 7.22E-01 | 9.62E-01 |
| SLC37A3     | 0.46  | 1.46E-01 | 1.00E+00 | 0.09  | 7.22E-01 | 9.62E-01 |
| G38011      | -0.04 | 9.47E-01 | 1.00E+00 | 0.37  | 7.22E-01 | 9.62E-01 |
| AP000944.2  | -1.67 | 2.87E-01 | 1.00E+00 | 0.38  | 7.22E-01 | 9.62E-01 |
| XLOC_001855 | -1.68 | 6.27E-01 | 1.00E+00 | 1.09  | 7.22E-01 | 9.62E-01 |
| SLC26A9     | -0.35 | 6.36E-01 | 1.00E+00 | 0.29  | 7.22E-01 | 9.62E-01 |
| SOX18       | 0.22  | 6.58E-01 | 1.00E+00 | 0.30  | 7.22E-01 | 9.62E-01 |
| HMGB3P22    | -0.17 | 9.22E-01 | 1.00E+00 | -0.39 | 7.22E-01 | 9.62E-01 |
| CHAD        | 0.22  | 7.27E-01 | 1.00E+00 | -0.24 | 7.22E-01 | 9.62E-01 |
| SSR4P1      | -0.90 | 4.93E-02 | 1.00E+00 | 0.31  | 7.22E-01 | 9.62E-01 |
| UBL7-AS1    | -0.41 | 3.10E-01 | 1.00E+00 | -0.10 | 7.22E-01 | 9.62E-01 |
| RPL21P89    | 0.10  | 9.41E-01 | 1.00E+00 | 0.27  | 7.22E-01 | 9.62E-01 |
| AL139805.1  | 1.23  | 5.09E-01 | 1.00E+00 | -0.44 | 7.22E-01 | 9.62E-01 |
| IL12RB1     | -0.34 | 5.83E-01 | 1.00E+00 | 1.11  | 7.22E-01 | 9.62E-01 |
| ALAS2       | 0.29  | 7.84E-01 | 1.00E+00 | -0.43 | 7.22E-01 | 9.62E-01 |
| CPE         | 0.44  | 3.73E-01 | 1.00E+00 | 0.23  | 7.22E-01 | 9.62E-01 |
| RN7SL181P   | -1.14 | 4.91E-02 | 1.00E+00 | 0.38  | 7.23E-01 | 9.62E-01 |
| TRBV5-4     | -0.76 | 6.81E-01 | 1.00E+00 | 0.46  | 7.23E-01 | 9.62E-01 |
| PNMT        | -0.24 | 7.47E-01 | 1.00E+00 | -0.36 | 7.23E-01 | 9.62E-01 |
| KRTDAP      | 0.29  | 5.64E-01 | 1.00E+00 | -0.28 | 7.23E-01 | 9.62E-01 |
| TSPAN14     | 0.07  | 7.23E-01 | 1.00E+00 | 0.11  | 7.23E-01 | 9.62E-01 |
| SELENOF     | 0.19  | 3.01E-01 | 1.00E+00 | -0.05 | 7.23E-01 | 9.62E-01 |
| ANAPC1      | -0.06 | 7.53E-01 | 1.00E+00 | -0.09 | 7.23E-01 | 9.62E-01 |
| GLE1        | 0.21  | 3.48E-01 | 1.00E+00 | 0.05  | 7.23E-01 | 9.62E-01 |
| HOXD3       | -0.17 | 8.40E-01 | 1.00E+00 | 0.44  | 7.23E-01 | 9.63E-01 |

|                    |       |          |          |       |          |          |
|--------------------|-------|----------|----------|-------|----------|----------|
| <b>AC007384.1</b>  | -0.85 | 3.49E-01 | 1.00E+00 | -0.36 | 7.23E-01 | 9.63E-01 |
| <b>DUSP4</b>       | 0.51  | 4.68E-01 | 1.00E+00 | 0.18  | 7.23E-01 | 9.63E-01 |
| <b>AL161785.1</b>  | -0.39 | 4.89E-01 | 1.00E+00 | 0.20  | 7.23E-01 | 9.63E-01 |
| <b>KRTAP5-4</b>    | 5.18  | 2.36E-02 | 9.15E-01 | 0.68  | 7.23E-01 | 9.63E-01 |
| <b>UBTD1</b>       | -0.12 | 7.74E-01 | 1.00E+00 | -0.17 | 7.23E-01 | 9.63E-01 |
| <b>BCKDHA</b>      | -0.84 | 7.19E-01 | 1.00E+00 | 0.34  | 7.23E-01 | 9.63E-01 |
| <b>PARP3</b>       | -0.03 | 9.48E-01 | 1.00E+00 | 0.14  | 7.23E-01 | 9.63E-01 |
| <b>WRAP73</b>      | 0.06  | 8.25E-01 | 1.00E+00 | -0.10 | 7.23E-01 | 9.63E-01 |
| <b>BHLHA15</b>     | -0.91 | 4.23E-01 | 1.00E+00 | -0.44 | 7.23E-01 | 9.63E-01 |
| <b>C2CD5</b>       | 0.08  | 7.52E-01 | 1.00E+00 | -0.12 | 7.23E-01 | 9.63E-01 |
| <b>XLOC_000266</b> | 0.03  | 9.93E-01 | 1.00E+00 | -0.87 | 7.23E-01 | 9.63E-01 |
| <b>RALY-AS1</b>    | -0.54 | 2.50E-01 | 1.00E+00 | 0.12  | 7.23E-01 | 9.63E-01 |
| <b>POLQ</b>        | 0.02  | 9.69E-01 | 1.00E+00 | 0.30  | 7.24E-01 | 9.63E-01 |
| <b>SDCCAG8</b>     | 0.06  | 7.67E-01 | 1.00E+00 | -0.08 | 7.24E-01 | 9.63E-01 |
| <b>PELI1</b>       | 0.10  | 7.19E-01 | 1.00E+00 | 0.07  | 7.24E-01 | 9.63E-01 |
| <b>PINK1-AS</b>    | 0.22  | 5.90E-01 | 1.00E+00 | -0.16 | 7.24E-01 | 9.63E-01 |
| <b>AC005722.2</b>  | -0.47 | 5.60E-01 | 1.00E+00 | 0.37  | 7.24E-01 | 9.63E-01 |
| <b>NPAT</b>        | -0.11 | 6.17E-01 | 1.00E+00 | 0.09  | 7.24E-01 | 9.63E-01 |
| <b>RNF148</b>      | -2.91 | 3.91E-01 | 1.00E+00 | 0.59  | 7.24E-01 | 9.63E-01 |
| <b>PLA2G4E</b>     | -0.57 | 3.22E-01 | 1.00E+00 | 0.28  | 7.24E-01 | 9.63E-01 |
| <b>ARFGEF3</b>     | 0.28  | 6.41E-01 | 1.00E+00 | -0.16 | 7.24E-01 | 9.63E-01 |
| <b>XLOC_002099</b> | 4.66  | 4.33E-02 | 1.00E+00 | 0.56  | 7.24E-01 | 9.63E-01 |
| <b>ITPRIP</b>      | -0.61 | 2.94E-01 | 1.00E+00 | 0.15  | 7.24E-01 | 9.63E-01 |
| <b>PITRM1</b>      | -0.32 | 2.18E-01 | 1.00E+00 | -0.11 | 7.24E-01 | 9.63E-01 |
| <b>ERVMER34-1</b>  | -0.30 | 6.50E-01 | 1.00E+00 | 0.24  | 7.24E-01 | 9.63E-01 |
| <b>ALOXE3</b>      | 0.11  | 8.63E-01 | 1.00E+00 | 0.21  | 7.24E-01 | 9.63E-01 |
| <b>PTPRQ</b>       | 2.06  | 2.55E-01 | 1.00E+00 | -0.38 | 7.24E-01 | 9.63E-01 |
| <b>CPLANE1</b>     | -0.29 | 2.38E-01 | 1.00E+00 | 0.13  | 7.24E-01 | 9.63E-01 |
| <b>KLK8</b>        | -0.10 | 8.69E-01 | 1.00E+00 | 0.26  | 7.24E-01 | 9.63E-01 |
| <b>CYCS</b>        | -0.15 | 4.87E-01 | 1.00E+00 | -0.07 | 7.24E-01 | 9.63E-01 |
| <b>AC074117.1</b>  | -0.71 | 2.21E-02 | 8.96E-01 | -0.27 | 7.24E-01 | 9.63E-01 |
| <b>NRIP3</b>       | 0.13  | 8.15E-01 | 1.00E+00 | -0.21 | 7.24E-01 | 9.63E-01 |

|                    |       |          |          |       |          |          |
|--------------------|-------|----------|----------|-------|----------|----------|
| <b>CARD17</b>      | 0.39  | 3.82E-01 | 1.00E+00 | -0.22 | 7.24E-01 | 9.63E-01 |
| <b>FRMPD1</b>      | 0.00  | 9.94E-01 | 1.00E+00 | 0.22  | 7.24E-01 | 9.63E-01 |
| <b>LINC02600</b>   | -0.03 | 9.66E-01 | 1.00E+00 | -1.12 | 7.24E-01 | 9.63E-01 |
| <b>AL031432.2</b>  | -0.33 | 7.21E-01 | 1.00E+00 | 0.47  | 7.25E-01 | 9.63E-01 |
| <b>AC005042.1</b>  | NA    | NA       | NA       | 0.60  | 7.25E-01 | 9.63E-01 |
| <b>MPZ</b>         | -0.11 | 8.61E-01 | 1.00E+00 | 0.98  | 7.25E-01 | 9.63E-01 |
| <b>HSPA13</b>      | 0.03  | 9.20E-01 | 1.00E+00 | 0.11  | 7.25E-01 | 9.63E-01 |
| <b>AKR7A3</b>      | -1.46 | 8.36E-02 | 1.00E+00 | -0.25 | 7.25E-01 | 9.63E-01 |
| <b>EXOSC1</b>      | -0.10 | 6.95E-01 | 1.00E+00 | 0.08  | 7.25E-01 | 9.63E-01 |
| <b>KHDRBS1</b>     | -0.01 | 9.61E-01 | 1.00E+00 | -0.12 | 7.25E-01 | 9.63E-01 |
| <b>TUFM</b>        | -0.10 | 6.39E-01 | 1.00E+00 | 0.04  | 7.25E-01 | 9.63E-01 |
| <b>C19orf33</b>    | 0.91  | 5.00E-01 | 1.00E+00 | -0.26 | 7.25E-01 | 9.63E-01 |
| <b>FAM234A</b>     | -0.01 | 9.54E-01 | 1.00E+00 | 0.08  | 7.25E-01 | 9.63E-01 |
| <b>KANSL1L</b>     | 0.01  | 9.60E-01 | 1.00E+00 | -0.12 | 7.25E-01 | 9.63E-01 |
| <b>NFATC2IP</b>    | -0.04 | 8.61E-01 | 1.00E+00 | -0.16 | 7.25E-01 | 9.63E-01 |
| <b>AC078850.1</b>  | 0.77  | 6.63E-01 | 1.00E+00 | 0.49  | 7.25E-01 | 9.63E-01 |
| <b>AL133260.1</b>  | -1.49 | 5.00E-01 | 1.00E+00 | -0.21 | 7.25E-01 | 9.63E-01 |
| <b>AL357568.1</b>  | 0.23  | 9.47E-01 | 1.00E+00 | 0.82  | 7.25E-01 | 9.63E-01 |
| <b>UBL4A</b>       | 0.12  | 5.03E-01 | 1.00E+00 | -0.07 | 7.25E-01 | 9.63E-01 |
| <b>OR10A3</b>      | -1.62 | 3.04E-01 | 1.00E+00 | 0.59  | 7.25E-01 | 9.63E-01 |
| <b>CEP295NL</b>    | 0.11  | 9.19E-01 | 1.00E+00 | -0.57 | 7.25E-01 | 9.63E-01 |
| <b>USP39</b>       | -0.02 | 8.89E-01 | 1.00E+00 | 0.06  | 7.25E-01 | 9.63E-01 |
| <b>AC115223.1</b>  | -0.03 | 9.26E-01 | 1.00E+00 | -0.12 | 7.25E-01 | 9.63E-01 |
| <b>RNA5SP283</b>   | -0.95 | 4.09E-01 | 1.00E+00 | 0.32  | 7.25E-01 | 9.63E-01 |
| <b>AC007256.1</b>  | -2.51 | 3.44E-01 | 1.00E+00 | 0.35  | 7.25E-01 | 9.63E-01 |
| <b>LINC01876</b>   | -0.71 | 5.49E-01 | 1.00E+00 | 0.27  | 7.25E-01 | 9.63E-01 |
| <b>FGF9</b>        | 1.46  | 1.08E-01 | 1.00E+00 | 0.44  | 7.26E-01 | 9.63E-01 |
| <b>NCOA1</b>       | -0.22 | 1.78E-01 | 1.00E+00 | -0.11 | 7.26E-01 | 9.63E-01 |
| <b>G41823</b>      | 0.10  | 9.23E-01 | 1.00E+00 | -0.22 | 7.26E-01 | 9.63E-01 |
| <b>GTF3C3</b>      | 0.07  | 7.72E-01 | 1.00E+00 | -0.08 | 7.26E-01 | 9.63E-01 |
| <b>ZNF841</b>      | 0.13  | 7.49E-01 | 1.00E+00 | 0.14  | 7.26E-01 | 9.63E-01 |
| <b>XLOC_005110</b> | -1.02 | 6.91E-01 | 1.00E+00 | -0.36 | 7.26E-01 | 9.63E-01 |

|                    |        |          |          |       |          |          |
|--------------------|--------|----------|----------|-------|----------|----------|
| <b>FAM53C</b>      | 0.11   | 4.55E-01 | 1.00E+00 | -0.14 | 7.26E-01 | 9.63E-01 |
| <b>KRTAP4-12</b>   | -19.06 | 2.73E-08 | 1.21E-05 | -1.12 | 7.26E-01 | 9.63E-01 |
| <b>OVOL1-AS1</b>   | 0.22   | 7.36E-01 | 1.00E+00 | -0.25 | 7.26E-01 | 9.63E-01 |
| <b>KRT5</b>        | -0.13  | 7.02E-01 | 1.00E+00 | 0.21  | 7.26E-01 | 9.63E-01 |
| <b>SH2D3A</b>      | 0.07   | 8.32E-01 | 1.00E+00 | -0.22 | 7.26E-01 | 9.63E-01 |
| <b>STAMBP</b>      | 0.20   | 2.81E-01 | 1.00E+00 | -0.06 | 7.26E-01 | 9.63E-01 |
| <b>RPF1</b>        | 0.01   | 9.70E-01 | 1.00E+00 | -0.08 | 7.26E-01 | 9.63E-01 |
| <b>TMEM200B</b>    | 0.50   | 1.10E-01 | 1.00E+00 | 0.25  | 7.26E-01 | 9.63E-01 |
| <b>EYA4</b>        | 2.21   | 6.24E-02 | 1.00E+00 | 0.38  | 7.26E-01 | 9.63E-01 |
| <b>G12890</b>      | -0.23  | 7.15E-01 | 1.00E+00 | -0.33 | 7.27E-01 | 9.63E-01 |
| <b>AC118754.1</b>  | -0.92  | 4.20E-01 | 1.00E+00 | 0.28  | 7.27E-01 | 9.63E-01 |
| <b>SLC7A10</b>     | 4.66   | 1.31E-03 | 1.95E-01 | 0.43  | 7.27E-01 | 9.63E-01 |
| <b>AL450992.2</b>  | 0.53   | 9.29E-02 | 1.00E+00 | -0.21 | 7.27E-01 | 9.63E-01 |
| <b>SNX16</b>       | 0.34   | 3.35E-01 | 1.00E+00 | -0.10 | 7.27E-01 | 9.63E-01 |
| <b>CACNA2D2</b>    | -0.23  | 5.92E-01 | 1.00E+00 | 0.21  | 7.27E-01 | 9.63E-01 |
| <b>KIAA0895L</b>   | -0.37  | 2.51E-01 | 1.00E+00 | 0.15  | 7.27E-01 | 9.63E-01 |
| <b>UBE2D2</b>      | 0.01   | 9.65E-01 | 1.00E+00 | -0.07 | 7.27E-01 | 9.63E-01 |
| <b>G22291</b>      | 0.50   | 5.92E-01 | 1.00E+00 | -0.35 | 7.27E-01 | 9.63E-01 |
| <b>AC010332.1</b>  | 1.34   | 3.28E-01 | 1.00E+00 | -0.28 | 7.27E-01 | 9.63E-01 |
| <b>CHD9</b>        | 0.08   | 6.74E-01 | 1.00E+00 | -0.07 | 7.27E-01 | 9.63E-01 |
| <b>CARF</b>        | 0.17   | 5.94E-01 | 1.00E+00 | 0.14  | 7.27E-01 | 9.63E-01 |
| <b>CYB5D2</b>      | -0.03  | 9.08E-01 | 1.00E+00 | -0.08 | 7.27E-01 | 9.63E-01 |
| <b>AL136531.3</b>  | -0.76  | 5.13E-01 | 1.00E+00 | -0.32 | 7.27E-01 | 9.63E-01 |
| <b>RPS7P3</b>      | -0.09  | 9.66E-01 | 1.00E+00 | 0.28  | 7.27E-01 | 9.63E-01 |
| <b>LRP3</b>        | 0.09   | 8.07E-01 | 1.00E+00 | 0.23  | 7.27E-01 | 9.63E-01 |
| <b>USP49</b>       | 0.08   | 8.19E-01 | 1.00E+00 | -0.13 | 7.27E-01 | 9.63E-01 |
| <b>C12orf60</b>    | 0.91   | 1.26E-01 | 1.00E+00 | 0.18  | 7.27E-01 | 9.63E-01 |
| <b>ITGB1-DT</b>    | -2.12  | 1.97E-01 | 1.00E+00 | 0.51  | 7.27E-01 | 9.63E-01 |
| <b>XLOC_001338</b> | -0.13  | 9.07E-01 | 1.00E+00 | 0.34  | 7.27E-01 | 9.63E-01 |
| <b>LINC01698</b>   | 0.53   | 4.04E-01 | 1.00E+00 | 0.33  | 7.27E-01 | 9.63E-01 |
| <b>CNPPD1</b>      | -0.07  | 6.92E-01 | 1.00E+00 | 0.05  | 7.27E-01 | 9.63E-01 |
| <b>CLHC1</b>       | -1.23  | 5.50E-02 | 1.00E+00 | -0.16 | 7.27E-01 | 9.63E-01 |

|                    |       |          |          |       |          |          |
|--------------------|-------|----------|----------|-------|----------|----------|
| <b>SHROOM3</b>     | 0.36  | 4.60E-01 | 1.00E+00 | 0.16  | 7.27E-01 | 9.63E-01 |
| <b>CERS4</b>       | -0.38 | 2.39E-01 | 1.00E+00 | 0.11  | 7.28E-01 | 9.63E-01 |
| <b>PDE3B</b>       | 3.69  | 5.14E-03 | 4.18E-01 | -0.33 | 7.28E-01 | 9.63E-01 |
| <b>EIF4G3</b>      | -0.55 | 3.40E-03 | 3.11E-01 | 0.14  | 7.28E-01 | 9.63E-01 |
| <b>XLOC_005409</b> | -0.47 | 8.06E-01 | 1.00E+00 | -0.39 | 7.28E-01 | 9.63E-01 |
| <b>ANKRD36B</b>    | 0.37  | 4.84E-01 | 1.00E+00 | -0.12 | 7.28E-01 | 9.63E-01 |
| <b>TOMM40L</b>     | 0.14  | 6.48E-01 | 1.00E+00 | 0.11  | 7.28E-01 | 9.63E-01 |
| <b>PAX9</b>        | -1.01 | 1.70E-01 | 1.00E+00 | -0.18 | 7.28E-01 | 9.63E-01 |
| <b>GIMAP7</b>      | 0.33  | 5.47E-01 | 1.00E+00 | 0.15  | 7.28E-01 | 9.63E-01 |
| <b>SFTPC</b>       | -0.96 | 8.23E-02 | 1.00E+00 | 0.32  | 7.28E-01 | 9.63E-01 |
| <b>RAET1E-AS1</b>  | -0.62 | 3.42E-01 | 1.00E+00 | 0.25  | 7.28E-01 | 9.63E-01 |
| <b>HDAC9</b>       | 0.13  | 7.68E-01 | 1.00E+00 | 0.13  | 7.28E-01 | 9.63E-01 |
| <b>LINC00681</b>   | 1.29  | 1.63E-01 | 1.00E+00 | -0.39 | 7.28E-01 | 9.63E-01 |
| <b>C4A</b>         | -0.09 | 9.39E-01 | 1.00E+00 | 1.09  | 7.28E-01 | 9.63E-01 |
| <b>FAM126B</b>     | -0.06 | 8.58E-01 | 1.00E+00 | 0.11  | 7.28E-01 | 9.63E-01 |
| <b>KIAA2026</b>    | -0.03 | 8.37E-01 | 1.00E+00 | -0.10 | 7.28E-01 | 9.63E-01 |
| <b>AC016205.1</b>  | -0.53 | 3.27E-01 | 1.00E+00 | -0.26 | 7.28E-01 | 9.63E-01 |
| <b>PIK3IP1</b>     | -0.17 | 4.54E-01 | 1.00E+00 | -0.09 | 7.28E-01 | 9.63E-01 |
| <b>CCDC50</b>      | 0.06  | 8.40E-01 | 1.00E+00 | 0.11  | 7.28E-01 | 9.63E-01 |
| <b>ZSCAN30</b>     | 0.27  | 4.53E-01 | 1.00E+00 | 0.17  | 7.28E-01 | 9.63E-01 |
| <b>ZNF805</b>      | -0.02 | 9.34E-01 | 1.00E+00 | 0.22  | 7.28E-01 | 9.63E-01 |
| <b>ANGPT1</b>      | 0.85  | 2.44E-01 | 1.00E+00 | -0.22 | 7.28E-01 | 9.63E-01 |
| <b>IP6K2</b>       | -0.06 | 8.78E-01 | 1.00E+00 | 0.11  | 7.28E-01 | 9.63E-01 |
| <b>SHLD2</b>       | 0.23  | 4.16E-01 | 1.00E+00 | -0.10 | 7.28E-01 | 9.63E-01 |
| <b>G39784</b>      | 0.53  | 6.72E-01 | 1.00E+00 | 0.37  | 7.29E-01 | 9.63E-01 |
| <b>NACA3P</b>      | -0.61 | 7.72E-01 | 1.00E+00 | -0.29 | 7.29E-01 | 9.63E-01 |
| <b>AC010463.3</b>  | 0.88  | 7.47E-01 | 1.00E+00 | 0.36  | 7.29E-01 | 9.63E-01 |
| <b>YBX1P10</b>     | -0.40 | 6.00E-01 | 1.00E+00 | -0.11 | 7.29E-01 | 9.63E-01 |
| <b>ESF1</b>        | 0.11  | 5.57E-01 | 1.00E+00 | -0.09 | 7.29E-01 | 9.63E-01 |
| <b>AL117336.3</b>  | -3.23 | 9.85E-05 | 2.44E-02 | 0.19  | 7.29E-01 | 9.63E-01 |
| <b>AL445437.1</b>  | 0.80  | 5.28E-01 | 1.00E+00 | 0.40  | 7.29E-01 | 9.63E-01 |
| <b>BANK1</b>       | 0.15  | 7.76E-01 | 1.00E+00 | 0.19  | 7.29E-01 | 9.63E-01 |



|                   |       |          |          |       |          |          |
|-------------------|-------|----------|----------|-------|----------|----------|
| <b>SPTAN1</b>     | -0.28 | 2.05E-01 | 1.00E+00 | 0.12  | 7.29E-01 | 9.63E-01 |
| <b>TMF1</b>       | -0.12 | 6.89E-01 | 1.00E+00 | -0.07 | 7.29E-01 | 9.63E-01 |
| <b>AC115618.1</b> | -0.66 | 5.29E-01 | 1.00E+00 | 0.22  | 7.29E-01 | 9.63E-01 |
| <b>RPL7P47</b>    | 0.88  | 7.98E-01 | 1.00E+00 | 0.30  | 7.29E-01 | 9.63E-01 |
| <b>RND2</b>       | -0.11 | 6.99E-01 | 1.00E+00 | -0.16 | 7.29E-01 | 9.63E-01 |
| <b>ALKBH6</b>     | -0.41 | 8.02E-01 | 1.00E+00 | -0.17 | 7.29E-01 | 9.63E-01 |
| <b>AP000842.2</b> | 0.06  | 9.38E-01 | 1.00E+00 | 0.32  | 7.29E-01 | 9.63E-01 |
| <b>DCAF17</b>     | 0.02  | 9.17E-01 | 1.00E+00 | -0.08 | 7.29E-01 | 9.63E-01 |
| <b>AL357552.2</b> | -0.46 | 8.15E-01 | 1.00E+00 | 0.40  | 7.29E-01 | 9.63E-01 |
| <b>AL161804.1</b> | -1.43 | 6.77E-01 | 1.00E+00 | -0.85 | 7.29E-01 | 9.63E-01 |
| <b>ST13P18</b>    | 0.47  | 8.15E-01 | 1.00E+00 | -0.17 | 7.29E-01 | 9.63E-01 |
| <b>PNLDC1</b>     | 2.62  | 8.00E-02 | 1.00E+00 | -0.39 | 7.29E-01 | 9.63E-01 |
| <b>CHKB</b>       | 1.55  | 3.94E-01 | 1.00E+00 | 0.26  | 7.29E-01 | 9.63E-01 |
| <b>SP6</b>        | 0.02  | 9.70E-01 | 1.00E+00 | 0.26  | 7.29E-01 | 9.63E-01 |
| <b>ADNP2</b>      | -0.22 | 2.90E-01 | 1.00E+00 | 0.12  | 7.29E-01 | 9.63E-01 |
| <b>AC092687.3</b> | -0.28 | 7.88E-01 | 1.00E+00 | 0.18  | 7.29E-01 | 9.63E-01 |
| <b>FGF13-AS1</b>  | 0.28  | 8.54E-01 | 1.00E+00 | -0.41 | 7.29E-01 | 9.63E-01 |
| <b>DDR1</b>       | -0.24 | 1.71E-01 | 1.00E+00 | -0.16 | 7.29E-01 | 9.63E-01 |
| <b>DHX15</b>      | 0.19  | 4.67E-01 | 1.00E+00 | 0.06  | 7.29E-01 | 9.63E-01 |
| <b>C1orf43</b>    | 0.19  | 2.55E-01 | 1.00E+00 | 0.05  | 7.29E-01 | 9.63E-01 |
| <b>SIDT1</b>      | 0.45  | 2.97E-01 | 1.00E+00 | 0.28  | 7.29E-01 | 9.64E-01 |
| <b>AP003108.2</b> | 2.33  | 2.69E-01 | 1.00E+00 | -0.48 | 7.30E-01 | 9.64E-01 |
| <b>CLIC3</b>      | 0.01  | 9.85E-01 | 1.00E+00 | 0.19  | 7.30E-01 | 9.64E-01 |
| <b>SRSF12</b>     | 0.31  | 5.57E-01 | 1.00E+00 | -0.25 | 7.30E-01 | 9.64E-01 |
| <b>DAAM2</b>      | 0.29  | 4.82E-01 | 1.00E+00 | 0.22  | 7.30E-01 | 9.64E-01 |
| <b>NIPSNAP1</b>   | -0.05 | 8.06E-01 | 1.00E+00 | 0.06  | 7.30E-01 | 9.64E-01 |
| <b>AC003986.2</b> | -0.02 | 9.88E-01 | 1.00E+00 | 0.27  | 7.30E-01 | 9.64E-01 |
| <b>TSACC</b>      | 0.38  | 7.58E-01 | 1.00E+00 | 0.32  | 7.30E-01 | 9.64E-01 |
| <b>RAB39A</b>     | -2.59 | 1.48E-01 | 1.00E+00 | 1.09  | 7.30E-01 | 9.64E-01 |
| <b>EPS8L1</b>     | -0.04 | 9.39E-01 | 1.00E+00 | 0.22  | 7.30E-01 | 9.64E-01 |
| <b>AL353626.2</b> | -2.36 | 4.90E-01 | 1.00E+00 | 0.30  | 7.30E-01 | 9.64E-01 |
| <b>STX12</b>      | 0.30  | 8.33E-02 | 1.00E+00 | -0.06 | 7.30E-01 | 9.64E-01 |

|                   |       |          |          |       |          |          |
|-------------------|-------|----------|----------|-------|----------|----------|
| <b>SORBS3</b>     | -0.32 | 2.05E-01 | 1.00E+00 | 0.14  | 7.30E-01 | 9.64E-01 |
| <b>KCNE2</b>      | 0.43  | 9.01E-01 | 1.00E+00 | -0.34 | 7.30E-01 | 9.64E-01 |
| <b>FAM110D</b>    | -0.38 | 2.70E-01 | 1.00E+00 | -0.30 | 7.30E-01 | 9.64E-01 |
| <b>GOLGA5</b>     | -0.13 | 5.09E-01 | 1.00E+00 | 0.05  | 7.30E-01 | 9.64E-01 |
| <b>AC004854.2</b> | 0.41  | 5.01E-01 | 1.00E+00 | 0.34  | 7.30E-01 | 9.64E-01 |
| <b>BRSK2</b>      | -0.73 | 6.18E-01 | 1.00E+00 | -0.39 | 7.30E-01 | 9.64E-01 |
| <b>AL391069.2</b> | -0.12 | 9.73E-01 | 1.00E+00 | 0.22  | 7.30E-01 | 9.64E-01 |
| <b>ACACA</b>      | 0.43  | 1.53E-01 | 1.00E+00 | -0.12 | 7.30E-01 | 9.64E-01 |
| <b>C17orf80</b>   | -0.06 | 8.53E-01 | 1.00E+00 | -0.12 | 7.31E-01 | 9.64E-01 |
| <b>G12586</b>     | -0.61 | 7.55E-01 | 1.00E+00 | -0.37 | 7.31E-01 | 9.64E-01 |
| <b>BEST4</b>      | -2.32 | 7.57E-02 | 1.00E+00 | 0.38  | 7.31E-01 | 9.64E-01 |
| <b>DHRS2</b>      | 2.51  | 1.50E-02 | 7.62E-01 | -0.41 | 7.31E-01 | 9.64E-01 |
| <b>AC105219.3</b> | -1.10 | 2.11E-01 | 1.00E+00 | -0.42 | 7.31E-01 | 9.64E-01 |
| <b>PNO1</b>       | -0.13 | 5.82E-01 | 1.00E+00 | 0.09  | 7.31E-01 | 9.64E-01 |
| <b>HOMER3-AS1</b> | -0.53 | 8.11E-01 | 1.00E+00 | -0.39 | 7.31E-01 | 9.64E-01 |
| <b>WDR78</b>      | 0.05  | 9.21E-01 | 1.00E+00 | -0.13 | 7.31E-01 | 9.64E-01 |
| <b>AC120036.3</b> | 0.57  | 6.09E-01 | 1.00E+00 | 0.36  | 7.31E-01 | 9.64E-01 |
| <b>HORMAD1</b>    | -2.67 | 3.83E-01 | 1.00E+00 | -0.40 | 7.31E-01 | 9.64E-01 |
| <b>MZT2A</b>      | -0.08 | 7.28E-01 | 1.00E+00 | -0.17 | 7.31E-01 | 9.64E-01 |
| <b>AC008147.2</b> | 1.85  | 4.14E-01 | 1.00E+00 | 0.36  | 7.31E-01 | 9.64E-01 |
| <b>SEMA3F</b>     | -0.16 | 6.53E-01 | 1.00E+00 | 0.23  | 7.31E-01 | 9.64E-01 |
| <b>TXNP5</b>      | -0.58 | 8.67E-01 | 1.00E+00 | 0.38  | 7.31E-01 | 9.64E-01 |
| <b>NLN</b>        | -0.14 | 5.21E-01 | 1.00E+00 | 0.08  | 7.31E-01 | 9.64E-01 |
| <b>NNT-AS1</b>    | 0.17  | 6.14E-01 | 1.00E+00 | -0.10 | 7.31E-01 | 9.64E-01 |
| <b>DARS2</b>      | -0.03 | 9.16E-01 | 1.00E+00 | 0.12  | 7.31E-01 | 9.64E-01 |
| <b>GABRA2</b>     | -0.09 | 9.15E-01 | 1.00E+00 | 0.31  | 7.31E-01 | 9.64E-01 |
| <b>LIPM</b>       | 0.15  | 7.94E-01 | 1.00E+00 | 0.22  | 7.31E-01 | 9.64E-01 |
| <b>EPDR1</b>      | 0.31  | 6.45E-01 | 1.00E+00 | -0.24 | 7.32E-01 | 9.64E-01 |
| <b>UBE2I</b>      | 0.15  | 4.49E-01 | 1.00E+00 | 0.12  | 7.32E-01 | 9.64E-01 |
| <b>IGFBP7</b>     | 0.08  | 8.61E-01 | 1.00E+00 | -0.20 | 7.32E-01 | 9.64E-01 |
| <b>MED14</b>      | -0.03 | 9.23E-01 | 1.00E+00 | 0.10  | 7.32E-01 | 9.64E-01 |
| <b>SNAP47</b>     | -0.09 | 6.32E-01 | 1.00E+00 | 0.06  | 7.32E-01 | 9.64E-01 |

|                   |       |          |          |       |          |          |
|-------------------|-------|----------|----------|-------|----------|----------|
| <b>EEF1DP7</b>    | -3.42 | 1.60E-01 | 1.00E+00 | -0.42 | 7.32E-01 | 9.64E-01 |
| <b>KCNH4</b>      | -0.53 | 5.75E-01 | 1.00E+00 | 0.49  | 7.32E-01 | 9.64E-01 |
| <b>LMTK2</b>      | 0.02  | 9.49E-01 | 1.00E+00 | 0.20  | 7.32E-01 | 9.64E-01 |
| <b>CES3</b>       | 0.33  | 6.47E-01 | 1.00E+00 | -0.34 | 7.32E-01 | 9.64E-01 |
| <b>PDXDC2P</b>    | -2.83 | 1.85E-01 | 1.00E+00 | -0.38 | 7.32E-01 | 9.64E-01 |
| <b>MRPL3</b>      | -0.19 | 3.17E-01 | 1.00E+00 | -0.06 | 7.32E-01 | 9.64E-01 |
| <b>NOMO2</b>      | 0.02  | 9.66E-01 | 1.00E+00 | 0.24  | 7.32E-01 | 9.64E-01 |
| <b>FAM118B</b>    | 0.10  | 7.40E-01 | 1.00E+00 | 0.11  | 7.32E-01 | 9.64E-01 |
| <b>PCDHB12</b>    | 0.12  | 8.24E-01 | 1.00E+00 | -0.26 | 7.32E-01 | 9.64E-01 |
| <b>ZNF425</b>     | 0.07  | 8.36E-01 | 1.00E+00 | -0.15 | 7.33E-01 | 9.64E-01 |
| <b>OXER1</b>      | -0.10 | 8.52E-01 | 1.00E+00 | 0.23  | 7.33E-01 | 9.64E-01 |
| <b>SPIN1</b>      | 0.12  | 4.91E-01 | 1.00E+00 | -0.07 | 7.33E-01 | 9.64E-01 |
| <b>EXOSC9</b>     | -0.11 | 6.18E-01 | 1.00E+00 | -0.08 | 7.33E-01 | 9.64E-01 |
| <b>METTL7A</b>    | 0.83  | 1.23E-02 | 6.93E-01 | 0.12  | 7.33E-01 | 9.64E-01 |
| <b>NUFIP1</b>     | -0.29 | 1.66E-01 | 1.00E+00 | 0.07  | 7.33E-01 | 9.64E-01 |
| <b>CHTF8</b>      | -0.18 | 2.06E-01 | 1.00E+00 | 0.07  | 7.33E-01 | 9.64E-01 |
| <b>AP000845.1</b> | 4.70  | 1.21E-01 | 1.00E+00 | 0.45  | 7.33E-01 | 9.64E-01 |
| <b>ZNF727</b>     | 1.79  | 2.03E-02 | 8.88E-01 | -0.17 | 7.33E-01 | 9.64E-01 |
| <b>CLDN14</b>     | 0.02  | 9.89E-01 | 1.00E+00 | 0.33  | 7.33E-01 | 9.64E-01 |
| <b>DBF4</b>       | -0.27 | 4.19E-01 | 1.00E+00 | 0.07  | 7.33E-01 | 9.64E-01 |
| <b>ZNF436</b>     | 0.19  | 3.83E-01 | 1.00E+00 | 0.11  | 7.33E-01 | 9.64E-01 |
| <b>AC026471.2</b> | -2.29 | 2.77E-01 | 1.00E+00 | -0.29 | 7.33E-01 | 9.64E-01 |
| <b>CPED1</b>      | 0.65  | 2.88E-01 | 1.00E+00 | -0.16 | 7.33E-01 | 9.64E-01 |
| <b>FAM25G</b>     | -0.56 | 8.73E-01 | 1.00E+00 | -0.28 | 7.33E-01 | 9.64E-01 |
| <b>UBXN10</b>     | -0.27 | 4.82E-01 | 1.00E+00 | 0.17  | 7.33E-01 | 9.64E-01 |
| <b>TLK2</b>       | -0.17 | 3.31E-01 | 1.00E+00 | 0.13  | 7.33E-01 | 9.64E-01 |
| <b>PHLPP1</b>     | -0.30 | 5.81E-02 | 1.00E+00 | 0.17  | 7.33E-01 | 9.64E-01 |
| <b>AC027277.2</b> | -0.58 | 5.52E-01 | 1.00E+00 | -0.34 | 7.33E-01 | 9.64E-01 |
| <b>EP300</b>      | -0.43 | 6.56E-02 | 1.00E+00 | 0.14  | 7.33E-01 | 9.64E-01 |
| <b>RGS14</b>      | -0.52 | 2.29E-01 | 1.00E+00 | 0.13  | 7.33E-01 | 9.64E-01 |
| <b>TPP2</b>       | 0.19  | 5.17E-01 | 1.00E+00 | 0.08  | 7.33E-01 | 9.64E-01 |
| <b>MED23</b>      | 0.42  | 2.15E-01 | 1.00E+00 | -0.11 | 7.33E-01 | 9.64E-01 |

|                    |        |          |          |       |          |          |
|--------------------|--------|----------|----------|-------|----------|----------|
| <b>XLOC_003544</b> | 2.14   | 4.67E-01 | 1.00E+00 | -0.32 | 7.33E-01 | 9.64E-01 |
| <b>AMN1</b>        | 0.12   | 7.61E-01 | 1.00E+00 | -0.14 | 7.33E-01 | 9.64E-01 |
| <b>ZNF213</b>      | -0.33  | 1.87E-01 | 1.00E+00 | 0.19  | 7.33E-01 | 9.64E-01 |
| <b>HIVEP2</b>      | -0.34  | 9.50E-02 | 1.00E+00 | 0.18  | 7.33E-01 | 9.64E-01 |
| <b>STK25</b>       | -0.07  | 7.52E-01 | 1.00E+00 | -0.11 | 7.33E-01 | 9.64E-01 |
| <b>AL049840.4</b>  | 0.27   | 5.07E-01 | 1.00E+00 | 0.13  | 7.34E-01 | 9.64E-01 |
| <b>IGHMBP2</b>     | -0.23  | 3.13E-01 | 1.00E+00 | 0.08  | 7.34E-01 | 9.64E-01 |
| <b>TRIM10</b>      | -2.19  | 1.90E-01 | 1.00E+00 | 1.08  | 7.34E-01 | 9.64E-01 |
| <b>KLKP1</b>       | -0.27  | 8.03E-01 | 1.00E+00 | 0.26  | 7.34E-01 | 9.64E-01 |
| <b>KIAA1551</b>    | -0.35  | 1.37E-01 | 1.00E+00 | 0.10  | 7.34E-01 | 9.64E-01 |
| <b>XDH</b>         | -0.42  | 4.47E-01 | 1.00E+00 | -0.28 | 7.34E-01 | 9.64E-01 |
| <b>PRMT7</b>       | 0.16   | 4.81E-01 | 1.00E+00 | 0.05  | 7.34E-01 | 9.64E-01 |
| <b>PTGES3P1</b>    | -0.07  | 8.56E-01 | 1.00E+00 | 0.18  | 7.34E-01 | 9.64E-01 |
| <b>CDKN2D</b>      | 0.03   | 9.16E-01 | 1.00E+00 | -0.10 | 7.34E-01 | 9.64E-01 |
| <b>KCNC4</b>       | -0.19  | 6.34E-01 | 1.00E+00 | 0.15  | 7.34E-01 | 9.64E-01 |
| <b>ELOVL4</b>      | 0.16   | 7.81E-01 | 1.00E+00 | 0.19  | 7.34E-01 | 9.64E-01 |
| <b>TPTEP1</b>      | -0.76  | 4.87E-02 | 1.00E+00 | -0.14 | 7.34E-01 | 9.64E-01 |
| <b>AC002470.1</b>  | -0.35  | 6.69E-01 | 1.00E+00 | -0.16 | 7.34E-01 | 9.64E-01 |
| <b>SLC13A4</b>     | -0.37  | 6.68E-01 | 1.00E+00 | -0.22 | 7.34E-01 | 9.64E-01 |
| <b>POLR3D</b>      | -0.01  | 9.69E-01 | 1.00E+00 | 0.14  | 7.34E-01 | 9.64E-01 |
| <b>C18orf21</b>    | 0.03   | 9.16E-01 | 1.00E+00 | 0.06  | 7.34E-01 | 9.64E-01 |
| <b>RPL24P4</b>     | -0.53  | 5.48E-01 | 1.00E+00 | 0.30  | 7.34E-01 | 9.64E-01 |
| <b>PAX8</b>        | -0.15  | 7.94E-01 | 1.00E+00 | 0.19  | 7.34E-01 | 9.64E-01 |
| <b>KRT7</b>        | 1.01   | 2.24E-01 | 1.00E+00 | -0.24 | 7.34E-01 | 9.64E-01 |
| <b>AC064799.1</b>  | 0.05   | 9.29E-01 | 1.00E+00 | -0.22 | 7.34E-01 | 9.64E-01 |
| <b>AL136084.2</b>  | -10.68 | 1.81E-03 | 2.38E-01 | -0.88 | 7.34E-01 | 9.64E-01 |
| <b>CMTM2</b>       | -2.20  | 2.44E-01 | 1.00E+00 | 0.39  | 7.34E-01 | 9.64E-01 |
| <b>AL928654.1</b>  | 0.85   | 3.33E-01 | 1.00E+00 | -0.26 | 7.34E-01 | 9.64E-01 |
| <b>XLOC_007462</b> | -0.09  | 7.73E-01 | 1.00E+00 | -0.17 | 7.34E-01 | 9.64E-01 |
| <b>MAPKAP1</b>     | 0.07   | 7.10E-01 | 1.00E+00 | -0.17 | 7.34E-01 | 9.64E-01 |
| <b>EIF4A3</b>      | -0.25  | 3.72E-01 | 1.00E+00 | 0.08  | 7.35E-01 | 9.64E-01 |
| <b>KLF4</b>        | -0.28  | 5.82E-01 | 1.00E+00 | 0.13  | 7.35E-01 | 9.64E-01 |

|                   |       |          |          |       |          |          |
|-------------------|-------|----------|----------|-------|----------|----------|
| <b>PSMD3</b>      | -0.14 | 5.93E-01 | 1.00E+00 | 0.12  | 7.35E-01 | 9.64E-01 |
| <b>GSC</b>        | 0.61  | 2.65E-01 | 1.00E+00 | 0.33  | 7.35E-01 | 9.64E-01 |
| <b>LINC01004</b>  | -0.26 | 8.03E-01 | 1.00E+00 | 0.18  | 7.35E-01 | 9.64E-01 |
| <b>MIR621</b>     | -0.22 | 6.17E-01 | 1.00E+00 | 0.45  | 7.35E-01 | 9.64E-01 |
| <b>SEC61B</b>     | -0.02 | 8.82E-01 | 1.00E+00 | -0.08 | 7.35E-01 | 9.64E-01 |
| <b>AC104109.2</b> | -0.93 | 1.93E-01 | 1.00E+00 | 0.17  | 7.35E-01 | 9.64E-01 |
| <b>ACAA1</b>      | -0.21 | 3.88E-01 | 1.00E+00 | 0.09  | 7.35E-01 | 9.64E-01 |
| <b>AC245100.4</b> | 0.49  | 7.86E-01 | 1.00E+00 | 0.29  | 7.35E-01 | 9.64E-01 |
| <b>MAPRE2</b>     | 0.04  | 8.50E-01 | 1.00E+00 | -0.10 | 7.35E-01 | 9.64E-01 |
| <b>TEX11</b>      | -2.08 | 2.53E-01 | 1.00E+00 | 0.42  | 7.35E-01 | 9.64E-01 |
| <b>RPL23AP57</b>  | NA    | NA       | NA       | 0.37  | 7.35E-01 | 9.64E-01 |
| <b>PRSS8</b>      | -0.15 | 7.52E-01 | 1.00E+00 | 0.19  | 7.35E-01 | 9.64E-01 |
| <b>PTGES3L</b>    | -4.61 | 1.75E-02 | 8.33E-01 | 0.32  | 7.35E-01 | 9.64E-01 |
| <b>USP25</b>      | -0.02 | 9.03E-01 | 1.00E+00 | -0.17 | 7.35E-01 | 9.64E-01 |
| <b>KRBA2</b>      | -0.38 | 4.98E-01 | 1.00E+00 | -0.17 | 7.35E-01 | 9.64E-01 |
| <b>CUL9</b>       | -0.11 | 5.82E-01 | 1.00E+00 | 0.16  | 7.35E-01 | 9.64E-01 |
| <b>TCP11L2</b>    | 0.10  | 6.74E-01 | 1.00E+00 | -0.13 | 7.35E-01 | 9.64E-01 |
| <b>SLC26A3</b>    | 0.92  | 6.94E-01 | 1.00E+00 | -0.42 | 7.35E-01 | 9.64E-01 |
| <b>WDR6</b>       | -0.38 | 1.72E-01 | 1.00E+00 | 0.14  | 7.35E-01 | 9.64E-01 |
| <b>EEF1A1P3</b>   | 0.79  | 5.40E-01 | 1.00E+00 | -0.28 | 7.35E-01 | 9.64E-01 |
| <b>TSNAXIP1</b>   | -1.14 | 1.58E-01 | 1.00E+00 | -0.32 | 7.35E-01 | 9.64E-01 |
| <b>KRTAP4-1</b>   | -2.42 | 4.64E-01 | 1.00E+00 | -1.08 | 7.35E-01 | 9.64E-01 |
| <b>ZNF451</b>     | 0.08  | 7.26E-01 | 1.00E+00 | 0.10  | 7.35E-01 | 9.64E-01 |
| <b>G25291</b>     | 0.58  | 6.56E-01 | 1.00E+00 | 0.42  | 7.35E-01 | 9.64E-01 |
| <b>AC023424.2</b> | -0.11 | 9.20E-01 | 1.00E+00 | -0.38 | 7.35E-01 | 9.64E-01 |
| <b>AC010970.1</b> | -0.38 | 3.84E-01 | 1.00E+00 | -0.27 | 7.35E-01 | 9.64E-01 |
| <b>EFHB</b>       | -1.00 | 2.88E-01 | 1.00E+00 | -0.25 | 7.35E-01 | 9.64E-01 |
| <b>AC093904.2</b> | 0.42  | 6.62E-01 | 1.00E+00 | 0.34  | 7.35E-01 | 9.64E-01 |
| <b>AC087473.1</b> | -1.96 | 5.91E-02 | 1.00E+00 | 0.38  | 7.36E-01 | 9.64E-01 |
| <b>ZSCAN32</b>    | 0.13  | 6.30E-01 | 1.00E+00 | -0.07 | 7.36E-01 | 9.64E-01 |
| <b>C8orf76</b>    | 0.31  | 7.39E-01 | 1.00E+00 | -0.16 | 7.36E-01 | 9.64E-01 |
| <b>DAPP1</b>      | 0.41  | 4.20E-01 | 1.00E+00 | 0.14  | 7.36E-01 | 9.64E-01 |

|                     |        |          |          |       |          |          |
|---------------------|--------|----------|----------|-------|----------|----------|
| <b>RP1L1</b>        | -0.24  | 6.37E-01 | 1.00E+00 | -0.70 | 7.36E-01 | 9.64E-01 |
| <b>CLASP2</b>       | 0.01   | 9.66E-01 | 1.00E+00 | -0.09 | 7.36E-01 | 9.64E-01 |
| <b>OCLN</b>         | 0.40   | 1.94E-01 | 1.00E+00 | -0.16 | 7.36E-01 | 9.64E-01 |
| <b>AC007376.2</b>   | 2.85   | 2.51E-01 | 1.00E+00 | 0.39  | 7.36E-01 | 9.64E-01 |
| <b>AC019330.1</b>   | -0.22  | 9.33E-01 | 1.00E+00 | -0.58 | 7.36E-01 | 9.64E-01 |
| <b>AL137796.1</b>   | -1.55  | 5.69E-01 | 1.00E+00 | -0.32 | 7.36E-01 | 9.64E-01 |
| <b>PKHD1</b>        | -0.86  | 1.00E-01 | 1.00E+00 | -0.34 | 7.36E-01 | 9.64E-01 |
| <b>MAPKAPK5-AS1</b> | 0.40   | 2.19E-01 | 1.00E+00 | -0.13 | 7.36E-01 | 9.64E-01 |
| <b>AC105052.4</b>   | -0.42  | 5.86E-01 | 1.00E+00 | 0.19  | 7.36E-01 | 9.64E-01 |
| <b>AL162274.2</b>   | -0.26  | 7.78E-01 | 1.00E+00 | 0.19  | 7.36E-01 | 9.64E-01 |
| <b>SDF2L1</b>       | -0.38  | 5.73E-02 | 1.00E+00 | 0.11  | 7.36E-01 | 9.64E-01 |
| <b>JAZF1</b>        | 0.24   | 3.67E-01 | 1.00E+00 | -0.10 | 7.36E-01 | 9.64E-01 |
| <b>GPR89A</b>       | -0.12  | 6.08E-01 | 1.00E+00 | -0.08 | 7.36E-01 | 9.64E-01 |
| <b>LINC01359</b>    | -2.03  | 3.89E-01 | 1.00E+00 | -0.38 | 7.36E-01 | 9.64E-01 |
| <b>EEF1DP1</b>      | -0.06  | 9.23E-01 | 1.00E+00 | -0.23 | 7.36E-01 | 9.65E-01 |
| <b>LINC00513</b>    | 2.21   | 1.00E-01 | 1.00E+00 | 0.28  | 7.36E-01 | 9.65E-01 |
| <b>IGKV1-17</b>     | 4.05   | 1.27E-01 | 1.00E+00 | 1.08  | 7.36E-01 | 9.65E-01 |
| <b>AC007842.1</b>   | -2.74  | 4.15E-02 | 1.00E+00 | 0.46  | 7.36E-01 | 9.65E-01 |
| <b>IGFL4</b>        | -1.07  | 1.28E-01 | 1.00E+00 | 0.23  | 7.36E-01 | 9.65E-01 |
| <b>KRTAP10-5</b>    | -18.79 | 2.66E-08 | 1.20E-05 | -1.08 | 7.36E-01 | 9.65E-01 |
| <b>C20orf202</b>    | 0.49   | 3.54E-01 | 1.00E+00 | 0.25  | 7.37E-01 | 9.65E-01 |
| <b>ADH4</b>         | 1.24   | 4.25E-01 | 1.00E+00 | -0.38 | 7.37E-01 | 9.65E-01 |
| <b>CCDC148</b>      | 0.34   | 6.18E-01 | 1.00E+00 | 0.25  | 7.37E-01 | 9.65E-01 |
| <b>MCPH1-AS1</b>    | 0.11   | 7.97E-01 | 1.00E+00 | -0.14 | 7.37E-01 | 9.65E-01 |
| <b>FSD1L</b>        | 0.29   | 7.82E-01 | 1.00E+00 | -0.24 | 7.37E-01 | 9.65E-01 |
| <b>CNST</b>         | 0.10   | 7.29E-01 | 1.00E+00 | -0.07 | 7.37E-01 | 9.65E-01 |
| <b>RFX3-AS1</b>     | 0.79   | 2.98E-01 | 1.00E+00 | 0.17  | 7.37E-01 | 9.65E-01 |
| <b>AC136475.2</b>   | -0.27  | 5.99E-01 | 1.00E+00 | 0.23  | 7.37E-01 | 9.65E-01 |
| <b>AMACR</b>        | -0.53  | 5.33E-01 | 1.00E+00 | 0.17  | 7.37E-01 | 9.65E-01 |
| <b>AC006141.1</b>   | 3.12   | 3.08E-02 | 1.00E+00 | 0.27  | 7.37E-01 | 9.65E-01 |
| <b>SEH1L</b>        | 0.06   | 8.08E-01 | 1.00E+00 | -0.09 | 7.37E-01 | 9.65E-01 |
| <b>PCDHA13</b>      | -1.93  | 1.95E-01 | 1.00E+00 | -0.58 | 7.37E-01 | 9.65E-01 |

|                    |       |          |          |       |          |          |
|--------------------|-------|----------|----------|-------|----------|----------|
| <b>SCLT1</b>       | -0.22 | 4.58E-01 | 1.00E+00 | -0.07 | 7.37E-01 | 9.65E-01 |
| <b>G25515</b>      | -1.50 | 5.47E-01 | 1.00E+00 | -0.40 | 7.37E-01 | 9.65E-01 |
| <b>LINC00115</b>   | -1.37 | 2.19E-01 | 1.00E+00 | 0.23  | 7.37E-01 | 9.65E-01 |
| <b>TFAP2A</b>      | -0.45 | 2.13E-01 | 1.00E+00 | 0.18  | 7.37E-01 | 9.65E-01 |
| <b>SINHCAF</b>     | 0.01  | 9.81E-01 | 1.00E+00 | -0.09 | 7.37E-01 | 9.65E-01 |
| <b>TMEM170B</b>    | 1.14  | 1.12E-01 | 1.00E+00 | -0.20 | 7.37E-01 | 9.65E-01 |
| <b>LRRTM4</b>      | 0.08  | 9.66E-01 | 1.00E+00 | -0.43 | 7.37E-01 | 9.65E-01 |
| <b>SNORC</b>       | 1.01  | 2.59E-01 | 1.00E+00 | 0.26  | 7.37E-01 | 9.65E-01 |
| <b>EWSAT1</b>      | 2.55  | 3.21E-02 | 1.00E+00 | 0.34  | 7.37E-01 | 9.65E-01 |
| <b>KCNJ3</b>       | -1.69 | 5.54E-01 | 1.00E+00 | -0.20 | 7.38E-01 | 9.65E-01 |
| <b>AC092910.3</b>  | 0.16  | 7.86E-01 | 1.00E+00 | -0.27 | 7.38E-01 | 9.65E-01 |
| <b>SUMF1</b>       | 0.09  | 6.75E-01 | 1.00E+00 | 0.08  | 7.38E-01 | 9.65E-01 |
| <b>UBE2J2</b>      | -0.18 | 4.37E-01 | 1.00E+00 | 0.05  | 7.38E-01 | 9.65E-01 |
| <b>GIPR</b>        | -1.66 | 2.13E-02 | 8.94E-01 | 0.17  | 7.38E-01 | 9.65E-01 |
| <b>STK38L</b>      | 0.17  | 4.95E-01 | 1.00E+00 | -0.08 | 7.38E-01 | 9.65E-01 |
| <b>MYL12A</b>      | 0.09  | 5.60E-01 | 1.00E+00 | -0.10 | 7.38E-01 | 9.65E-01 |
| <b>XLOC_009810</b> | -0.80 | 8.18E-01 | 1.00E+00 | -0.49 | 7.38E-01 | 9.65E-01 |
| <b>AL136162.1</b>  | -2.20 | 8.98E-03 | 5.88E-01 | -0.32 | 7.38E-01 | 9.65E-01 |
| <b>DEAF1</b>       | -0.39 | 8.79E-02 | 1.00E+00 | -0.14 | 7.38E-01 | 9.65E-01 |
| <b>HOMEZ</b>       | 0.18  | 5.72E-01 | 1.00E+00 | -0.13 | 7.38E-01 | 9.65E-01 |
| <b>HCG27</b>       | 1.24  | 2.55E-01 | 1.00E+00 | 0.32  | 7.38E-01 | 9.65E-01 |
| <b>LAMTOR5-AS1</b> | -0.33 | 6.95E-01 | 1.00E+00 | -0.20 | 7.38E-01 | 9.65E-01 |
| <b>STARD6</b>      | 1.95  | 2.87E-01 | 1.00E+00 | 0.49  | 7.38E-01 | 9.65E-01 |
| <b>LINC01637</b>   | -3.18 | 2.10E-02 | 8.94E-01 | -0.25 | 7.38E-01 | 9.65E-01 |
| <b>KLHL20</b>      | -0.08 | 6.64E-01 | 1.00E+00 | 0.06  | 7.38E-01 | 9.65E-01 |
| <b>TES</b>         | -0.15 | 4.30E-01 | 1.00E+00 | -0.05 | 7.38E-01 | 9.65E-01 |
| <b>RPL21P134</b>   | 2.33  | 4.95E-01 | 1.00E+00 | 0.26  | 7.38E-01 | 9.65E-01 |
| <b>AC087481.3</b>  | 0.16  | 6.97E-01 | 1.00E+00 | 0.25  | 7.38E-01 | 9.65E-01 |
| <b>RIMS4</b>       | 1.24  | 3.98E-01 | 1.00E+00 | 0.41  | 7.38E-01 | 9.65E-01 |
| <b>AC010969.1</b>  | 4.37  | 9.55E-02 | 1.00E+00 | -0.40 | 7.38E-01 | 9.65E-01 |
| <b>XLOC_006335</b> | -0.26 | 7.49E-01 | 1.00E+00 | 0.31  | 7.39E-01 | 9.65E-01 |
| <b>XLOC_011031</b> | -0.80 | 2.73E-01 | 1.00E+00 | -0.22 | 7.39E-01 | 9.65E-01 |

|                    |       |          |          |       |          |          |
|--------------------|-------|----------|----------|-------|----------|----------|
| <b>GNG7</b>        | -0.03 | 9.63E-01 | 1.00E+00 | -0.14 | 7.39E-01 | 9.65E-01 |
| <b>MDGA2</b>       | -0.28 | 6.91E-01 | 1.00E+00 | -0.35 | 7.39E-01 | 9.65E-01 |
| <b>RPGR</b>        | 0.41  | 7.54E-02 | 1.00E+00 | 0.11  | 7.39E-01 | 9.65E-01 |
| <b>G35484</b>      | -1.23 | 7.24E-01 | 1.00E+00 | 1.06  | 7.39E-01 | 9.65E-01 |
| <b>AC087741.3</b>  | 1.00  | 4.81E-02 | 1.00E+00 | 0.26  | 7.39E-01 | 9.65E-01 |
| <b>XLOC_005180</b> | -1.52 | 1.85E-01 | 1.00E+00 | 0.35  | 7.39E-01 | 9.65E-01 |
| <b>COPS6</b>       | -0.06 | 7.51E-01 | 1.00E+00 | -0.08 | 7.39E-01 | 9.65E-01 |
| <b>G11188</b>      | 0.49  | 6.70E-02 | 1.00E+00 | -0.18 | 7.39E-01 | 9.65E-01 |
| <b>XLOC_011677</b> | -2.12 | 2.29E-01 | 1.00E+00 | 0.49  | 7.39E-01 | 9.65E-01 |
| <b>SLC26A11</b>    | -0.21 | 4.29E-01 | 1.00E+00 | 0.18  | 7.39E-01 | 9.65E-01 |
| <b>AL031775.2</b>  | 2.30  | 3.94E-02 | 1.00E+00 | 0.34  | 7.39E-01 | 9.65E-01 |
| <b>SNRPGP2</b>     | -0.55 | 7.91E-01 | 1.00E+00 | -0.19 | 7.39E-01 | 9.65E-01 |
| <b>CBX4</b>        | -0.84 | 3.02E-02 | 1.00E+00 | -0.23 | 7.39E-01 | 9.65E-01 |
| <b>TMBIM1</b>      | 0.21  | 1.62E-01 | 1.00E+00 | -0.06 | 7.39E-01 | 9.65E-01 |
| <b>XLOC_003406</b> | 0.57  | 4.68E-01 | 1.00E+00 | -0.39 | 7.39E-01 | 9.65E-01 |
| <b>NCOA4</b>       | 0.06  | 7.68E-01 | 1.00E+00 | -0.06 | 7.39E-01 | 9.65E-01 |
| <b>TRAPPC12</b>    | -0.21 | 4.80E-01 | 1.00E+00 | -0.16 | 7.39E-01 | 9.65E-01 |
| <b>GATA2</b>       | 0.55  | 1.62E-01 | 1.00E+00 | 0.22  | 7.39E-01 | 9.65E-01 |
| <b>FZD9</b>        | 0.36  | 2.57E-01 | 1.00E+00 | -0.29 | 7.39E-01 | 9.65E-01 |
| <b>FAM215B</b>     | 1.39  | 3.81E-01 | 1.00E+00 | 0.36  | 7.40E-01 | 9.65E-01 |
| <b>SNORA7</b>      | -1.45 | 5.00E-01 | 1.00E+00 | 0.24  | 7.40E-01 | 9.65E-01 |
| <b>ARSE</b>        | -0.38 | 5.46E-01 | 1.00E+00 | 0.24  | 7.40E-01 | 9.66E-01 |
| <b>CFAP77</b>      | -0.90 | 7.47E-01 | 1.00E+00 | 0.39  | 7.40E-01 | 9.66E-01 |
| <b>MRPS27</b>      | -0.09 | 6.53E-01 | 1.00E+00 | 0.05  | 7.40E-01 | 9.66E-01 |
| <b>CMTM5</b>       | 0.47  | 5.00E-01 | 1.00E+00 | -0.21 | 7.40E-01 | 9.66E-01 |
| <b>AC110285.1</b>  | -0.05 | 9.20E-01 | 1.00E+00 | 0.26  | 7.40E-01 | 9.66E-01 |
| <b>LINC01198</b>   | 0.91  | 5.51E-01 | 1.00E+00 | -0.31 | 7.40E-01 | 9.66E-01 |
| <b>CCND1</b>       | 0.37  | 6.38E-02 | 1.00E+00 | -0.11 | 7.40E-01 | 9.66E-01 |
| <b>LINC01869</b>   | -2.54 | 2.19E-01 | 1.00E+00 | -0.40 | 7.40E-01 | 9.66E-01 |
| <b>LRRC37B</b>     | -0.04 | 9.30E-01 | 1.00E+00 | -0.14 | 7.40E-01 | 9.66E-01 |
| <b>PEX10</b>       | -0.29 | 2.75E-01 | 1.00E+00 | -0.11 | 7.40E-01 | 9.66E-01 |
| <b>KLK11</b>       | -0.07 | 8.62E-01 | 1.00E+00 | -0.19 | 7.40E-01 | 9.66E-01 |



|                    |        |          |          |       |          |          |
|--------------------|--------|----------|----------|-------|----------|----------|
| <b>NLRP6</b>       | -1.69  | 2.31E-02 | 9.12E-01 | 0.99  | 7.40E-01 | 9.66E-01 |
| <b>PCSK1N</b>      | -0.85  | 1.10E-01 | 1.00E+00 | 0.21  | 7.40E-01 | 9.66E-01 |
| <b>RB1CC1</b>      | 0.09   | 7.36E-01 | 1.00E+00 | -0.07 | 7.40E-01 | 9.66E-01 |
| <b>ATP5F1AP3</b>   | 0.36   | 8.97E-01 | 1.00E+00 | -0.25 | 7.40E-01 | 9.66E-01 |
| <b>CFAP57</b>      | 0.49   | 5.84E-01 | 1.00E+00 | 0.21  | 7.41E-01 | 9.66E-01 |
| <b>TM9SF1</b>      | 0.11   | 7.47E-01 | 1.00E+00 | -0.09 | 7.41E-01 | 9.66E-01 |
| <b>G10019</b>      | 0.82   | 6.82E-01 | 1.00E+00 | 0.46  | 7.41E-01 | 9.66E-01 |
| <b>SRP54</b>       | 0.01   | 9.45E-01 | 1.00E+00 | -0.05 | 7.41E-01 | 9.66E-01 |
| <b>G23966</b>      | 0.57   | 5.38E-01 | 1.00E+00 | 0.21  | 7.41E-01 | 9.66E-01 |
| <b>LMNB2</b>       | -0.07  | 7.30E-01 | 1.00E+00 | 0.20  | 7.41E-01 | 9.66E-01 |
| <b>CMTM1</b>       | 0.22   | 6.80E-01 | 1.00E+00 | 0.19  | 7.41E-01 | 9.66E-01 |
| <b>XLOC_001286</b> | -0.87  | 6.50E-01 | 1.00E+00 | 0.70  | 7.41E-01 | 9.66E-01 |
| <b>CCDC149</b>     | -0.05  | 8.68E-01 | 1.00E+00 | 0.16  | 7.41E-01 | 9.66E-01 |
| <b>KRTAP10-12</b>  | -30.00 | 3.46E-18 | 5.54E-15 | -1.06 | 7.41E-01 | 9.66E-01 |
| <b>AQP1</b>        | 0.01   | 9.81E-01 | 1.00E+00 | -0.15 | 7.41E-01 | 9.66E-01 |
| <b>DIRAS2</b>      | -1.60  | 1.32E-02 | 7.22E-01 | 0.28  | 7.41E-01 | 9.66E-01 |
| <b>Z83851.2</b>    | -2.14  | 2.36E-02 | 9.15E-01 | 0.31  | 7.42E-01 | 9.66E-01 |
| <b>MRPL37</b>      | -0.19  | 3.22E-01 | 1.00E+00 | 0.08  | 7.42E-01 | 9.66E-01 |
| <b>SPA17</b>       | -0.05  | 9.23E-01 | 1.00E+00 | -0.11 | 7.42E-01 | 9.66E-01 |
| <b>RSPH14</b>      | -0.39  | 3.46E-01 | 1.00E+00 | 0.25  | 7.42E-01 | 9.66E-01 |
| <b>PUF60</b>       | -0.39  | 1.29E-01 | 1.00E+00 | 0.06  | 7.42E-01 | 9.66E-01 |
| <b>DEK</b>         | -0.03  | 8.85E-01 | 1.00E+00 | -0.06 | 7.42E-01 | 9.66E-01 |
| <b>TRPV2</b>       | 0.09   | 8.20E-01 | 1.00E+00 | 0.18  | 7.42E-01 | 9.66E-01 |
| <b>RSRC1</b>       | -0.12  | 5.53E-01 | 1.00E+00 | -0.07 | 7.42E-01 | 9.66E-01 |
| <b>CIPC</b>        | -0.21  | 4.54E-01 | 1.00E+00 | -0.09 | 7.42E-01 | 9.66E-01 |
| <b>ZSCAN9</b>      | -0.05  | 8.94E-01 | 1.00E+00 | 0.14  | 7.42E-01 | 9.66E-01 |
| <b>G9222</b>       | -0.02  | 9.81E-01 | 1.00E+00 | 0.33  | 7.42E-01 | 9.66E-01 |
| <b>TDP1</b>        | -0.07  | 7.75E-01 | 1.00E+00 | 0.08  | 7.42E-01 | 9.66E-01 |
| <b>NOXRED1</b>     | 0.30   | 8.23E-01 | 1.00E+00 | 0.41  | 7.42E-01 | 9.66E-01 |
| <b>AC011379.1</b>  | -0.06  | 9.86E-01 | 1.00E+00 | -0.39 | 7.42E-01 | 9.66E-01 |
| <b>TAF1D</b>       | -0.15  | 3.14E-01 | 1.00E+00 | 0.08  | 7.43E-01 | 9.66E-01 |
| <b>RPS2</b>        | -0.44  | 1.83E-01 | 1.00E+00 | -0.19 | 7.43E-01 | 9.66E-01 |

|            |       |          |          |       |          |          |
|------------|-------|----------|----------|-------|----------|----------|
| AHNAK2     | -0.25 | 5.34E-01 | 1.00E+00 | 0.15  | 7.43E-01 | 9.66E-01 |
| MRRF       | -0.43 | 6.63E-02 | 1.00E+00 | -0.06 | 7.43E-01 | 9.66E-01 |
| NPIPP1     | 0.20  | 8.23E-01 | 1.00E+00 | -0.19 | 7.43E-01 | 9.66E-01 |
| FAM192BP   | -1.52 | 5.23E-01 | 1.00E+00 | -0.19 | 7.43E-01 | 9.66E-01 |
| M1AP       | -0.70 | 4.24E-01 | 1.00E+00 | 0.28  | 7.43E-01 | 9.66E-01 |
| GDF9       | -0.31 | 5.61E-01 | 1.00E+00 | -0.31 | 7.43E-01 | 9.66E-01 |
| AC027117.1 | 1.27  | 3.66E-01 | 1.00E+00 | -0.27 | 7.43E-01 | 9.66E-01 |
| GTF3C5     | -0.23 | 2.94E-01 | 1.00E+00 | 0.06  | 7.43E-01 | 9.66E-01 |
| RBM23      | 0.03  | 8.45E-01 | 1.00E+00 | 0.09  | 7.43E-01 | 9.66E-01 |
| AC116913.1 | -0.88 | 3.07E-01 | 1.00E+00 | 0.18  | 7.43E-01 | 9.66E-01 |
| AC025035.1 | -0.24 | 8.53E-01 | 1.00E+00 | 0.43  | 7.43E-01 | 9.66E-01 |
| API5P1     | 0.91  | 7.69E-01 | 1.00E+00 | 0.18  | 7.43E-01 | 9.66E-01 |
| WWC2       | 0.33  | 4.45E-01 | 1.00E+00 | 0.15  | 7.43E-01 | 9.66E-01 |
| GBP7       | 4.18  | 1.67E-01 | 1.00E+00 | 0.30  | 7.43E-01 | 9.66E-01 |
| UNC79      | -0.53 | 5.16E-01 | 1.00E+00 | -0.27 | 7.43E-01 | 9.66E-01 |
| PROS1      | 0.15  | 4.33E-01 | 1.00E+00 | -0.09 | 7.43E-01 | 9.66E-01 |
| GLYATL1    | 0.53  | 4.47E-01 | 1.00E+00 | -0.21 | 7.43E-01 | 9.66E-01 |
| ASXL2      | -0.10 | 6.22E-01 | 1.00E+00 | 0.11  | 7.43E-01 | 9.66E-01 |
| STX2       | 0.33  | 4.38E-01 | 1.00E+00 | -0.16 | 7.43E-01 | 9.66E-01 |
| AL109614.1 | 2.79  | 2.01E-01 | 1.00E+00 | -0.38 | 7.43E-01 | 9.66E-01 |
| ACTR1A     | -0.02 | 8.57E-01 | 1.00E+00 | 0.05  | 7.43E-01 | 9.66E-01 |
| CASP3      | -0.02 | 9.32E-01 | 1.00E+00 | 0.08  | 7.43E-01 | 9.66E-01 |
| MAIP1      | -0.03 | 8.92E-01 | 1.00E+00 | -0.09 | 7.43E-01 | 9.66E-01 |
| AP005136.2 | -1.44 | 6.75E-01 | 1.00E+00 | 0.45  | 7.43E-01 | 9.66E-01 |
| PKD1L2     | 0.56  | 4.08E-01 | 1.00E+00 | 0.75  | 7.43E-01 | 9.66E-01 |
| TNFRSF10A  | -0.50 | 4.80E-02 | 1.00E+00 | 0.12  | 7.43E-01 | 9.66E-01 |
| DSC3       | -0.10 | 7.84E-01 | 1.00E+00 | -0.19 | 7.44E-01 | 9.66E-01 |
| CDT1       | -0.77 | 1.78E-02 | 8.38E-01 | 0.18  | 7.44E-01 | 9.66E-01 |
| JMJD7      | -1.57 | 4.05E-01 | 1.00E+00 | -0.27 | 7.44E-01 | 9.66E-01 |
| AL512598.1 | -2.45 | 3.77E-01 | 1.00E+00 | 0.27  | 7.44E-01 | 9.66E-01 |
| NSUN5P1    | -0.21 | 4.99E-01 | 1.00E+00 | -0.10 | 7.44E-01 | 9.66E-01 |
| FANK1      | 0.64  | 5.62E-02 | 1.00E+00 | 0.12  | 7.44E-01 | 9.66E-01 |

|            |       |          |          |       |          |          |
|------------|-------|----------|----------|-------|----------|----------|
| GAD1       | -0.04 | 9.72E-01 | 1.00E+00 | 0.40  | 7.44E-01 | 9.66E-01 |
| BOP1       | -0.41 | 2.34E-01 | 1.00E+00 | -0.28 | 7.44E-01 | 9.66E-01 |
| PDE6B      | 0.67  | 3.28E-01 | 1.00E+00 | 0.19  | 7.44E-01 | 9.66E-01 |
| AL136084.3 | 1.63  | 6.32E-01 | 1.00E+00 | -0.35 | 7.44E-01 | 9.66E-01 |
| CKMT2-AS1  | 0.03  | 9.38E-01 | 1.00E+00 | -0.12 | 7.44E-01 | 9.66E-01 |
| LINC02073  | -1.65 | 1.44E-01 | 1.00E+00 | -0.39 | 7.44E-01 | 9.66E-01 |
| AL365475.1 | -1.60 | 6.34E-01 | 1.00E+00 | -0.33 | 7.44E-01 | 9.66E-01 |
| EFNA4      | -0.11 | 7.05E-01 | 1.00E+00 | -0.15 | 7.44E-01 | 9.66E-01 |
| TNS4       | -0.72 | 8.52E-02 | 1.00E+00 | 0.21  | 7.44E-01 | 9.66E-01 |
| AP002495.1 | 0.25  | 5.45E-01 | 1.00E+00 | 0.15  | 7.44E-01 | 9.66E-01 |
| H2AFY2     | -0.32 | 2.21E-01 | 1.00E+00 | -0.09 | 7.44E-01 | 9.66E-01 |
| MALAT1     | -0.01 | 9.87E-01 | 1.00E+00 | 0.10  | 7.44E-01 | 9.66E-01 |
| MFSD3      | -0.32 | 3.53E-01 | 1.00E+00 | 0.15  | 7.44E-01 | 9.66E-01 |
| KCNMB2-AS1 | NA    | NA       | NA       | -0.42 | 7.44E-01 | 9.66E-01 |
| ZNF780B    | 0.44  | 3.69E-01 | 1.00E+00 | -0.13 | 7.44E-01 | 9.66E-01 |
| CD99       | 0.71  | 6.59E-01 | 1.00E+00 | -0.23 | 7.44E-01 | 9.66E-01 |
| AL356488.2 | -0.14 | 7.40E-01 | 1.00E+00 | -0.14 | 7.44E-01 | 9.66E-01 |
| FAM25A     | -2.34 | 3.00E-01 | 1.00E+00 | 0.30  | 7.44E-01 | 9.66E-01 |
| KCNT2      | 0.11  | 8.29E-01 | 1.00E+00 | 0.31  | 7.44E-01 | 9.66E-01 |
| C6orf99    | -0.02 | 9.76E-01 | 1.00E+00 | 0.24  | 7.44E-01 | 9.66E-01 |
| DNAH10     | 0.07  | 9.19E-01 | 1.00E+00 | -0.18 | 7.44E-01 | 9.66E-01 |
| OR2A1      | 0.28  | 7.99E-01 | 1.00E+00 | -0.39 | 7.44E-01 | 9.66E-01 |
| UTRN       | -0.21 | 3.21E-01 | 1.00E+00 | 0.09  | 7.44E-01 | 9.66E-01 |
| FRRS1      | 0.38  | 3.63E-01 | 1.00E+00 | 0.24  | 7.44E-01 | 9.66E-01 |
| AC008014.1 | -0.01 | 9.85E-01 | 1.00E+00 | -0.16 | 7.44E-01 | 9.66E-01 |
| TMEM171    | -1.08 | 7.86E-02 | 1.00E+00 | -0.20 | 7.44E-01 | 9.66E-01 |
| LINC02515  | -0.33 | 7.50E-01 | 1.00E+00 | 0.34  | 7.44E-01 | 9.66E-01 |
| RPL7P6     | -0.83 | 6.36E-01 | 1.00E+00 | 0.31  | 7.44E-01 | 9.66E-01 |
| RORC       | -0.18 | 5.15E-01 | 1.00E+00 | -0.14 | 7.44E-01 | 9.66E-01 |
| RMND5A     | 0.28  | 3.03E-01 | 1.00E+00 | -0.11 | 7.44E-01 | 9.66E-01 |
| PNRC2      | -0.01 | 9.53E-01 | 1.00E+00 | 0.06  | 7.44E-01 | 9.66E-01 |
| AL683813.1 | 0.87  | 3.44E-01 | 1.00E+00 | -0.29 | 7.45E-01 | 9.66E-01 |

|                   |       |          |          |       |          |          |
|-------------------|-------|----------|----------|-------|----------|----------|
| <b>RN7SKP230</b>  | -3.77 | 4.82E-02 | 1.00E+00 | -0.28 | 7.45E-01 | 9.66E-01 |
| <b>RPL26P19</b>   | -0.49 | 3.19E-01 | 1.00E+00 | -0.16 | 7.45E-01 | 9.66E-01 |
| <b>PSMD8</b>      | 0.02  | 9.02E-01 | 1.00E+00 | -0.05 | 7.45E-01 | 9.66E-01 |
| <b>HGD</b>        | 3.47  | 2.13E-01 | 1.00E+00 | -1.04 | 7.45E-01 | 9.66E-01 |
| <b>ATP13A1</b>    | -0.29 | 1.76E-01 | 1.00E+00 | 0.20  | 7.45E-01 | 9.66E-01 |
| <b>AEBP2</b>      | -0.12 | 6.64E-01 | 1.00E+00 | -0.13 | 7.45E-01 | 9.66E-01 |
| <b>AL357140.5</b> | 0.09  | 9.50E-01 | 1.00E+00 | 0.39  | 7.45E-01 | 9.66E-01 |
| <b>IGFL3</b>      | 0.12  | 7.87E-01 | 1.00E+00 | -0.24 | 7.45E-01 | 9.66E-01 |
| <b>APOA1</b>      | -0.96 | 6.21E-01 | 1.00E+00 | -0.22 | 7.45E-01 | 9.66E-01 |
| <b>TDRD10</b>     | 0.66  | 1.42E-01 | 1.00E+00 | -0.38 | 7.45E-01 | 9.66E-01 |
| <b>RPL13AP7</b>   | -0.46 | 6.37E-01 | 1.00E+00 | 0.26  | 7.45E-01 | 9.66E-01 |
| <b>MORF4L1P1</b>  | 0.10  | 7.08E-01 | 1.00E+00 | 0.11  | 7.45E-01 | 9.66E-01 |
| <b>ARHGEF3</b>    | -0.46 | 1.96E-02 | 8.75E-01 | 0.09  | 7.45E-01 | 9.66E-01 |
| <b>ATXN2-AS</b>   | 2.07  | 5.39E-01 | 1.00E+00 | -0.34 | 7.45E-01 | 9.66E-01 |
| <b>G25045</b>     | -2.69 | 2.37E-01 | 1.00E+00 | -0.43 | 7.45E-01 | 9.66E-01 |
| <b>ZNF43</b>      | 0.07  | 8.41E-01 | 1.00E+00 | -0.10 | 7.45E-01 | 9.66E-01 |
| <b>DPF3</b>       | -0.35 | 3.57E-01 | 1.00E+00 | -0.20 | 7.45E-01 | 9.66E-01 |
| <b>CPM</b>        | 0.21  | 3.26E-01 | 1.00E+00 | -0.09 | 7.45E-01 | 9.66E-01 |
| <b>NIPAL2</b>     | 0.01  | 9.88E-01 | 1.00E+00 | -0.10 | 7.45E-01 | 9.66E-01 |
| <b>PXMP4</b>      | -0.39 | 2.53E-01 | 1.00E+00 | -0.12 | 7.45E-01 | 9.66E-01 |
| <b>PARAL1</b>     | 5.55  | 7.44E-03 | 5.24E-01 | -0.35 | 7.45E-01 | 9.66E-01 |
| <b>THAP12</b>     | 0.31  | 1.58E-01 | 1.00E+00 | 0.16  | 7.45E-01 | 9.66E-01 |
| <b>LHX4</b>       | -1.42 | 3.27E-01 | 1.00E+00 | 0.42  | 7.45E-01 | 9.66E-01 |
| <b>ZSCAN12P1</b>  | 0.33  | 6.83E-01 | 1.00E+00 | 0.21  | 7.45E-01 | 9.66E-01 |
| <b>AC027228.2</b> | 1.17  | 3.46E-01 | 1.00E+00 | -0.28 | 7.45E-01 | 9.66E-01 |
| <b>GCC1</b>       | -0.01 | 9.30E-01 | 1.00E+00 | 0.10  | 7.45E-01 | 9.66E-01 |
| <b>ARPC3P5</b>    | -0.80 | 8.18E-01 | 1.00E+00 | 0.26  | 7.45E-01 | 9.66E-01 |
| <b>TEX22</b>      | 0.24  | 8.50E-01 | 1.00E+00 | 0.40  | 7.45E-01 | 9.66E-01 |
| <b>CASC11</b>     | -2.82 | 2.25E-01 | 1.00E+00 | -0.33 | 7.45E-01 | 9.66E-01 |
| <b>PHAX</b>       | 0.02  | 9.27E-01 | 1.00E+00 | -0.07 | 7.45E-01 | 9.66E-01 |
| <b>PSME1</b>      | -0.09 | 7.10E-01 | 1.00E+00 | 0.06  | 7.45E-01 | 9.66E-01 |
| <b>LINC00648</b>  | -2.83 | 1.90E-01 | 1.00E+00 | 0.43  | 7.45E-01 | 9.66E-01 |

|                   |       |          |          |       |          |          |
|-------------------|-------|----------|----------|-------|----------|----------|
| <b>MKI67</b>      | -0.42 | 1.76E-01 | 1.00E+00 | 0.21  | 7.45E-01 | 9.66E-01 |
| <b>BRAF</b>       | 0.01  | 9.46E-01 | 1.00E+00 | 0.09  | 7.45E-01 | 9.66E-01 |
| <b>RRNAD1</b>     | -0.10 | 5.46E-01 | 1.00E+00 | 0.09  | 7.45E-01 | 9.66E-01 |
| <b>C5orf51</b>    | 0.04  | 8.40E-01 | 1.00E+00 | 0.11  | 7.45E-01 | 9.66E-01 |
| <b>G6277</b>      | 0.72  | 1.44E-01 | 1.00E+00 | 0.20  | 7.46E-01 | 9.66E-01 |
| <b>SLC6A16</b>    | 0.51  | 1.31E-01 | 1.00E+00 | 0.20  | 7.46E-01 | 9.66E-01 |
| <b>AC009902.2</b> | -2.91 | 5.03E-02 | 1.00E+00 | 0.26  | 7.46E-01 | 9.66E-01 |
| <b>AC015802.6</b> | 0.23  | 8.04E-01 | 1.00E+00 | -0.32 | 7.46E-01 | 9.66E-01 |
| <b>B3GNT2</b>     | -0.01 | 9.74E-01 | 1.00E+00 | 0.11  | 7.46E-01 | 9.66E-01 |
| <b>ARL4AP1</b>    | -2.93 | 1.17E-01 | 1.00E+00 | -0.83 | 7.46E-01 | 9.66E-01 |
| <b>TTC38</b>      | 0.62  | 6.09E-03 | 4.63E-01 | -0.10 | 7.46E-01 | 9.66E-01 |
| <b>STOM</b>       | 0.20  | 4.37E-01 | 1.00E+00 | -0.10 | 7.46E-01 | 9.66E-01 |
| <b>RAMP2-AS1</b>  | 0.21  | 7.16E-01 | 1.00E+00 | 0.63  | 7.46E-01 | 9.66E-01 |
| <b>AL157813.1</b> | -1.19 | 3.82E-01 | 1.00E+00 | 0.21  | 7.46E-01 | 9.66E-01 |
| <b>PHBP19</b>     | 0.36  | 9.16E-01 | 1.00E+00 | 0.43  | 7.46E-01 | 9.66E-01 |
| <b>AC104134.1</b> | -2.73 | 2.39E-01 | 1.00E+00 | -0.47 | 7.46E-01 | 9.66E-01 |
| <b>MTCO3P12</b>   | -0.42 | 3.34E-01 | 1.00E+00 | -0.21 | 7.46E-01 | 9.66E-01 |
| <b>LINC02055</b>  | -2.84 | 9.86E-02 | 1.00E+00 | -1.03 | 7.46E-01 | 9.66E-01 |
| <b>DNM1</b>       | 0.11  | 8.04E-01 | 1.00E+00 | 0.19  | 7.46E-01 | 9.66E-01 |
| <b>ZDHHC11</b>    | 0.26  | 7.38E-01 | 1.00E+00 | 0.32  | 7.46E-01 | 9.66E-01 |
| <b>AC012073.1</b> | 0.52  | 6.78E-01 | 1.00E+00 | 0.43  | 7.46E-01 | 9.66E-01 |
| <b>AURKB</b>      | 0.09  | 7.87E-01 | 1.00E+00 | 0.18  | 7.46E-01 | 9.66E-01 |
| <b>CEP76</b>      | 0.11  | 7.88E-01 | 1.00E+00 | -0.08 | 7.47E-01 | 9.66E-01 |
| <b>AP001636.3</b> | 0.12  | 8.29E-01 | 1.00E+00 | -0.17 | 7.47E-01 | 9.66E-01 |
| <b>HOXA4</b>      | -0.62 | 4.08E-01 | 1.00E+00 | -0.23 | 7.47E-01 | 9.66E-01 |
| <b>ARHGEF35</b>   | 0.14  | 7.50E-01 | 1.00E+00 | -0.14 | 7.47E-01 | 9.66E-01 |
| <b>CARMN</b>      | 0.29  | 6.81E-01 | 1.00E+00 | -0.18 | 7.47E-01 | 9.66E-01 |
| <b>P4HTM</b>      | -0.08 | 7.27E-01 | 1.00E+00 | -0.14 | 7.47E-01 | 9.66E-01 |
| <b>PTPRB</b>      | 0.29  | 6.09E-01 | 1.00E+00 | 0.19  | 7.47E-01 | 9.66E-01 |
| <b>RPL22P2</b>    | 0.56  | 6.95E-01 | 1.00E+00 | -0.18 | 7.47E-01 | 9.66E-01 |
| <b>C2CD3</b>      | 0.07  | 7.26E-01 | 1.00E+00 | 0.18  | 7.47E-01 | 9.66E-01 |
| <b>AL031777.1</b> | -3.04 | 2.50E-02 | 9.28E-01 | -0.47 | 7.47E-01 | 9.66E-01 |

|                    |       |          |          |       |          |          |
|--------------------|-------|----------|----------|-------|----------|----------|
| <b>ACOD1</b>       | NA    | NA       | NA       | 0.70  | 7.47E-01 | 9.66E-01 |
| <b>FREM1</b>       | 0.77  | 7.26E-02 | 1.00E+00 | -0.23 | 7.47E-01 | 9.66E-01 |
| <b>RAB38</b>       | 0.04  | 9.33E-01 | 1.00E+00 | 0.20  | 7.47E-01 | 9.66E-01 |
| <b>ARL6IP6</b>     | 0.11  | 7.70E-01 | 1.00E+00 | -0.12 | 7.47E-01 | 9.66E-01 |
| <b>SUPT3H</b>      | 0.06  | 8.71E-01 | 1.00E+00 | 0.11  | 7.47E-01 | 9.66E-01 |
| <b>HEIH</b>        | 0.08  | 7.64E-01 | 1.00E+00 | -0.11 | 7.47E-01 | 9.66E-01 |
| <b>RBBP6</b>       | -0.27 | 3.70E-01 | 1.00E+00 | 0.12  | 7.47E-01 | 9.66E-01 |
| <b>HSP90AB2P</b>   | -1.33 | 7.02E-01 | 1.00E+00 | -0.20 | 7.47E-01 | 9.66E-01 |
| <b>FANCM</b>       | -0.59 | 2.15E-01 | 1.00E+00 | -0.09 | 7.47E-01 | 9.66E-01 |
| <b>CST1</b>        | -5.85 | 7.91E-02 | 1.00E+00 | -0.66 | 7.47E-01 | 9.66E-01 |
| <b>RALB</b>        | 0.05  | 8.13E-01 | 1.00E+00 | -0.08 | 7.47E-01 | 9.66E-01 |
| <b>XLOC_006923</b> | -2.57 | 4.51E-01 | 1.00E+00 | 0.38  | 7.47E-01 | 9.66E-01 |
| <b>RAB41</b>       | 1.26  | 1.47E-02 | 7.61E-01 | -0.21 | 7.47E-01 | 9.66E-01 |
| <b>HERC4</b>       | 0.16  | 6.05E-01 | 1.00E+00 | 0.06  | 7.48E-01 | 9.66E-01 |
| <b>CTNND1</b>      | -0.18 | 4.33E-01 | 1.00E+00 | -0.07 | 7.48E-01 | 9.66E-01 |
| <b>AJ009632.2</b>  | -2.85 | 1.94E-01 | 1.00E+00 | -0.44 | 7.48E-01 | 9.66E-01 |
| <b>FAM173A</b>     | -0.45 | 1.41E-01 | 1.00E+00 | 0.19  | 7.48E-01 | 9.66E-01 |
| <b>LMOD3</b>       | -0.06 | 9.64E-01 | 1.00E+00 | -0.28 | 7.48E-01 | 9.66E-01 |
| <b>CEP57</b>       | 0.27  | 2.99E-01 | 1.00E+00 | -0.06 | 7.48E-01 | 9.66E-01 |
| <b>AL359091.5</b>  | 0.29  | 8.29E-01 | 1.00E+00 | 0.33  | 7.48E-01 | 9.66E-01 |
| <b>TMPRSS11GP</b>  | 4.69  | 6.76E-02 | 1.00E+00 | -1.00 | 7.48E-01 | 9.66E-01 |
| <b>RNF165</b>      | -0.62 | 1.48E-01 | 1.00E+00 | -0.18 | 7.48E-01 | 9.66E-01 |
| <b>PNKD</b>        | 0.11  | 6.19E-01 | 1.00E+00 | 0.09  | 7.48E-01 | 9.66E-01 |
| <b>GSK3A</b>       | -0.07 | 7.55E-01 | 1.00E+00 | 0.16  | 7.48E-01 | 9.66E-01 |
| <b>AL358942.1</b>  | -2.66 | 4.18E-01 | 1.00E+00 | -0.20 | 7.48E-01 | 9.66E-01 |
| <b>FER1L4</b>      | 0.98  | 3.35E-01 | 1.00E+00 | -0.37 | 7.48E-01 | 9.66E-01 |
| <b>LINC00624</b>   | 0.45  | 6.60E-01 | 1.00E+00 | -0.30 | 7.48E-01 | 9.66E-01 |
| <b>CARS</b>        | 0.16  | 5.56E-01 | 1.00E+00 | 0.05  | 7.48E-01 | 9.66E-01 |
| <b>SMG1P4</b>      | -3.50 | 2.13E-01 | 1.00E+00 | -0.33 | 7.48E-01 | 9.66E-01 |
| <b>KIAA2012</b>    | -3.70 | 4.08E-02 | 1.00E+00 | -0.22 | 7.48E-01 | 9.66E-01 |
| <b>CDK14</b>       | 0.21  | 6.74E-01 | 1.00E+00 | 0.13  | 7.48E-01 | 9.66E-01 |
| <b>GNL3</b>        | 0.00  | 9.86E-01 | 1.00E+00 | 0.05  | 7.48E-01 | 9.66E-01 |

|                   |       |          |          |       |          |          |
|-------------------|-------|----------|----------|-------|----------|----------|
| <b>DHODH</b>      | 0.17  | 3.95E-01 | 1.00E+00 | 0.09  | 7.48E-01 | 9.66E-01 |
| <b>FPGS</b>       | -0.09 | 7.59E-01 | 1.00E+00 | 0.12  | 7.49E-01 | 9.66E-01 |
| <b>DNAJC10</b>    | -0.10 | 7.03E-01 | 1.00E+00 | -0.06 | 7.49E-01 | 9.67E-01 |
| <b>PPM1M</b>      | 0.33  | 3.28E-01 | 1.00E+00 | 0.17  | 7.49E-01 | 9.67E-01 |
| <b>ALDH8A1</b>    | 0.24  | 7.88E-01 | 1.00E+00 | 0.38  | 7.49E-01 | 9.67E-01 |
| <b>AL359922.2</b> | -1.62 | 5.96E-01 | 1.00E+00 | -0.54 | 7.49E-01 | 9.67E-01 |
| <b>INSR</b>       | 0.33  | 3.27E-01 | 1.00E+00 | -0.08 | 7.49E-01 | 9.67E-01 |
| <b>IGSF9B</b>     | -0.74 | 2.55E-01 | 1.00E+00 | 0.43  | 7.49E-01 | 9.67E-01 |
| <b>TIGD3</b>      | -1.93 | 1.44E-01 | 1.00E+00 | 0.35  | 7.49E-01 | 9.67E-01 |
| <b>AL161645.1</b> | -3.01 | 3.19E-02 | 1.00E+00 | 0.42  | 7.49E-01 | 9.67E-01 |
| <b>ZNF671</b>     | 0.65  | 1.26E-01 | 1.00E+00 | 0.19  | 7.49E-01 | 9.67E-01 |
| <b>TRH</b>        | -0.89 | 5.88E-01 | 1.00E+00 | 0.45  | 7.49E-01 | 9.67E-01 |
| <b>GDI2</b>       | 0.00  | 9.83E-01 | 1.00E+00 | -0.04 | 7.49E-01 | 9.67E-01 |
| <b>CEP295</b>     | 0.15  | 5.85E-01 | 1.00E+00 | -0.09 | 7.49E-01 | 9.67E-01 |
| <b>AC092756.1</b> | -3.52 | 3.60E-02 | 1.00E+00 | -0.29 | 7.49E-01 | 9.67E-01 |
| <b>AC100858.3</b> | -3.43 | 1.19E-02 | 6.78E-01 | -0.23 | 7.49E-01 | 9.67E-01 |
| <b>AC011495.1</b> | 0.03  | 9.80E-01 | 1.00E+00 | 0.20  | 7.49E-01 | 9.67E-01 |
| <b>AC133134.1</b> | -0.67 | 8.48E-01 | 1.00E+00 | -0.25 | 7.49E-01 | 9.67E-01 |
| <b>SPDL1</b>      | -0.11 | 7.26E-01 | 1.00E+00 | -0.09 | 7.49E-01 | 9.67E-01 |
| <b>ZNF414</b>     | -0.51 | 1.77E-01 | 1.00E+00 | -0.19 | 7.49E-01 | 9.67E-01 |
| <b>SMARCA4</b>    | -0.31 | 1.65E-01 | 1.00E+00 | 0.12  | 7.49E-01 | 9.67E-01 |
| <b>LYG2</b>       | -4.53 | 7.65E-02 | 1.00E+00 | -1.01 | 7.50E-01 | 9.67E-01 |
| <b>PTBP3</b>      | 0.07  | 8.27E-01 | 1.00E+00 | -0.11 | 7.50E-01 | 9.67E-01 |
| <b>LINC01106</b>  | -1.04 | 1.99E-01 | 1.00E+00 | -0.22 | 7.50E-01 | 9.67E-01 |
| <b>AL353898.2</b> | 1.59  | 4.07E-01 | 1.00E+00 | 0.39  | 7.50E-01 | 9.67E-01 |
| <b>MOGS</b>       | -0.30 | 3.09E-01 | 1.00E+00 | 0.16  | 7.50E-01 | 9.67E-01 |
| <b>ATR</b>        | 0.09  | 6.03E-01 | 1.00E+00 | -0.12 | 7.50E-01 | 9.67E-01 |
| <b>AC008663.2</b> | -0.28 | 7.96E-01 | 1.00E+00 | -0.40 | 7.50E-01 | 9.67E-01 |
| <b>HECA</b>       | 0.16  | 6.23E-01 | 1.00E+00 | -0.08 | 7.50E-01 | 9.67E-01 |
| <b>BZW1</b>       | 0.00  | 9.89E-01 | 1.00E+00 | -0.07 | 7.50E-01 | 9.67E-01 |
| <b>IGLV5-45</b>   | 0.74  | 8.28E-01 | 1.00E+00 | 1.02  | 7.50E-01 | 9.67E-01 |
| <b>RAD9B</b>      | 0.11  | 8.87E-01 | 1.00E+00 | 0.26  | 7.50E-01 | 9.67E-01 |

|               |       |          |          |       |          |          |
|---------------|-------|----------|----------|-------|----------|----------|
| KIZ           | -0.13 | 5.96E-01 | 1.00E+00 | -0.09 | 7.50E-01 | 9.67E-01 |
| FGD6          | -0.04 | 9.10E-01 | 1.00E+00 | -0.13 | 7.50E-01 | 9.67E-01 |
| LINC00910     | -0.51 | 2.67E-01 | 1.00E+00 | 0.09  | 7.50E-01 | 9.67E-01 |
| MARS2         | -0.25 | 3.57E-01 | 1.00E+00 | -0.13 | 7.50E-01 | 9.67E-01 |
| CCDC151       | -0.48 | 4.25E-01 | 1.00E+00 | -0.30 | 7.50E-01 | 9.67E-01 |
| AC090912.1    | -0.56 | 7.00E-01 | 1.00E+00 | 0.21  | 7.50E-01 | 9.67E-01 |
| HSD3B7        | 0.05  | 8.65E-01 | 1.00E+00 | -0.10 | 7.50E-01 | 9.67E-01 |
| AL365357.1    | -3.10 | 7.64E-02 | 1.00E+00 | -1.00 | 7.50E-01 | 9.67E-01 |
| CYP2C18       | -1.09 | 1.12E-01 | 1.00E+00 | -0.23 | 7.50E-01 | 9.67E-01 |
| LINC02381     | 0.36  | 3.10E-01 | 1.00E+00 | 0.10  | 7.50E-01 | 9.67E-01 |
| DEDD          | 0.08  | 6.60E-01 | 1.00E+00 | -0.07 | 7.50E-01 | 9.67E-01 |
| KL            | 0.20  | 7.60E-01 | 1.00E+00 | -0.25 | 7.50E-01 | 9.67E-01 |
| APBA1         | 0.00  | 9.99E-01 | 1.00E+00 | 0.22  | 7.50E-01 | 9.67E-01 |
| CTD-2173L22.4 | -0.41 | 4.54E-01 | 1.00E+00 | -0.20 | 7.50E-01 | 9.67E-01 |
| MED14OS       | -1.85 | 3.20E-01 | 1.00E+00 | -0.24 | 7.51E-01 | 9.67E-01 |
| LINC02086     | -2.23 | 5.15E-01 | 1.00E+00 | 0.61  | 7.51E-01 | 9.67E-01 |
| PLA2G4E-AS1   | 1.01  | 2.25E-01 | 1.00E+00 | 0.28  | 7.51E-01 | 9.67E-01 |
| WDFY3         | -0.01 | 9.76E-01 | 1.00E+00 | 0.15  | 7.51E-01 | 9.67E-01 |
| NEDD9         | 0.07  | 9.10E-01 | 1.00E+00 | -0.17 | 7.51E-01 | 9.67E-01 |
| HDHD5         | 0.12  | 5.18E-01 | 1.00E+00 | -0.04 | 7.51E-01 | 9.67E-01 |
| XLOC_004049   | -2.29 | 5.04E-01 | 1.00E+00 | 0.37  | 7.51E-01 | 9.67E-01 |
| RPL32         | -0.16 | 5.80E-01 | 1.00E+00 | 0.07  | 7.51E-01 | 9.67E-01 |
| G19170        | 1.27  | 4.21E-01 | 1.00E+00 | 0.32  | 7.51E-01 | 9.67E-01 |
| AC025887.2    | 0.59  | 6.37E-01 | 1.00E+00 | -0.38 | 7.51E-01 | 9.67E-01 |
| KCTD18        | 0.02  | 9.36E-01 | 1.00E+00 | -0.08 | 7.51E-01 | 9.67E-01 |
| EAF2          | -0.21 | 5.33E-01 | 1.00E+00 | 0.12  | 7.51E-01 | 9.67E-01 |
| ASAP3         | 0.03  | 9.06E-01 | 1.00E+00 | 0.09  | 7.51E-01 | 9.67E-01 |
| ARNTL2        | -0.03 | 9.64E-01 | 1.00E+00 | -0.14 | 7.51E-01 | 9.67E-01 |
| KRIT1         | 0.10  | 7.92E-01 | 1.00E+00 | -0.11 | 7.51E-01 | 9.67E-01 |
| CFAP410       | -0.26 | 4.64E-01 | 1.00E+00 | 0.08  | 7.51E-01 | 9.67E-01 |
| LINC00885     | -0.65 | 1.76E-01 | 1.00E+00 | 0.21  | 7.51E-01 | 9.67E-01 |
| ASB7          | -0.03 | 9.10E-01 | 1.00E+00 | 0.08  | 7.51E-01 | 9.67E-01 |



|                    |        |          |          |       |          |          |
|--------------------|--------|----------|----------|-------|----------|----------|
| <b>RPL13AP5</b>    | -0.17  | 5.23E-01 | 1.00E+00 | 0.18  | 7.51E-01 | 9.67E-01 |
| <b>LOXHD1</b>      | -0.50  | 6.49E-01 | 1.00E+00 | 0.38  | 7.51E-01 | 9.67E-01 |
| <b>COQ10B</b>      | -0.15  | 5.85E-01 | 1.00E+00 | -0.09 | 7.51E-01 | 9.67E-01 |
| <b>ZNF514</b>      | -0.12  | 6.84E-01 | 1.00E+00 | 0.09  | 7.51E-01 | 9.67E-01 |
| <b>RPRD2</b>       | -0.11  | 6.24E-01 | 1.00E+00 | 0.08  | 7.51E-01 | 9.67E-01 |
| <b>PPP2R3C</b>     | 0.14   | 7.11E-01 | 1.00E+00 | 0.11  | 7.52E-01 | 9.67E-01 |
| <b>ANP32AP1</b>    | -1.91  | 3.22E-01 | 1.00E+00 | 0.25  | 7.52E-01 | 9.67E-01 |
| <b>UBE2D3</b>      | 0.05   | 7.74E-01 | 1.00E+00 | -0.06 | 7.52E-01 | 9.67E-01 |
| <b>STRN3</b>       | 0.05   | 8.38E-01 | 1.00E+00 | 0.08  | 7.52E-01 | 9.67E-01 |
| <b>SRP68</b>       | -0.02  | 9.21E-01 | 1.00E+00 | -0.07 | 7.52E-01 | 9.67E-01 |
| <b>AC139887.2</b>  | -0.10  | 9.08E-01 | 1.00E+00 | 0.14  | 7.52E-01 | 9.67E-01 |
| <b>IKBIP</b>       | 0.09   | 8.20E-01 | 1.00E+00 | 0.18  | 7.52E-01 | 9.67E-01 |
| <b>MYL4</b>        | -2.01  | 1.65E-01 | 1.00E+00 | 0.30  | 7.52E-01 | 9.67E-01 |
| <b>RP1-12G14.6</b> | -1.24  | 7.19E-01 | 1.00E+00 | 0.59  | 7.52E-01 | 9.67E-01 |
| <b>NHP2</b>        | -0.10  | 6.61E-01 | 1.00E+00 | 0.11  | 7.52E-01 | 9.67E-01 |
| <b>CDCA4P4</b>     | 1.26   | 8.64E-02 | 1.00E+00 | 0.26  | 7.52E-01 | 9.67E-01 |
| <b>MGA</b>         | -0.05  | 8.84E-01 | 1.00E+00 | -0.12 | 7.52E-01 | 9.67E-01 |
| <b>KIAA1549L</b>   | -1.10  | 8.70E-05 | 2.21E-02 | -0.21 | 7.52E-01 | 9.67E-01 |
| <b>G34066</b>      | 0.85   | 4.69E-01 | 1.00E+00 | 0.41  | 7.52E-01 | 9.67E-01 |
| <b>FAM228A</b>     | -0.45  | 6.31E-01 | 1.00E+00 | -0.27 | 7.52E-01 | 9.67E-01 |
| <b>CHN2</b>        | 0.16   | 6.47E-01 | 1.00E+00 | 0.17  | 7.52E-01 | 9.67E-01 |
| <b>KRTAP2-4</b>    | -30.00 | 4.60E-18 | 5.54E-15 | -1.01 | 7.52E-01 | 9.67E-01 |
| <b>FKTN</b>        | 0.25   | 4.02E-01 | 1.00E+00 | 0.09  | 7.52E-01 | 9.67E-01 |
| <b>AADA2L2</b>     | 0.35   | 5.30E-01 | 1.00E+00 | -0.20 | 7.52E-01 | 9.67E-01 |
| <b>AL157756.1</b>  | 1.14   | 1.98E-01 | 1.00E+00 | 0.37  | 7.52E-01 | 9.67E-01 |
| <b>RPL34P34</b>    | 0.56   | 8.71E-01 | 1.00E+00 | -0.24 | 7.52E-01 | 9.67E-01 |
| <b>STARD4</b>      | -0.91  | 1.14E-01 | 1.00E+00 | 0.08  | 7.52E-01 | 9.67E-01 |
| <b>HCG20</b>       | 1.75   | 1.17E-01 | 1.00E+00 | 0.34  | 7.52E-01 | 9.67E-01 |
| <b>AC010864.1</b>  | -0.01  | 9.94E-01 | 1.00E+00 | -0.32 | 7.52E-01 | 9.67E-01 |
| <b>ZNF169</b>      | -0.43  | 2.42E-01 | 1.00E+00 | -0.16 | 7.52E-01 | 9.67E-01 |
| <b>KRT24</b>       | 1.64   | 6.31E-01 | 1.00E+00 | 1.01  | 7.52E-01 | 9.67E-01 |
| <b>RRP1B</b>       | -0.12  | 5.81E-01 | 1.00E+00 | -0.11 | 7.53E-01 | 9.67E-01 |

|                    |        |          |          |       |          |          |
|--------------------|--------|----------|----------|-------|----------|----------|
| <b>CTDP1</b>       | -0.26  | 4.55E-01 | 1.00E+00 | 0.23  | 7.53E-01 | 9.67E-01 |
| <b>ABLIM2</b>      | -0.31  | 3.22E-01 | 1.00E+00 | 0.14  | 7.53E-01 | 9.67E-01 |
| <b>AC018647.2</b>  | 0.00   | 9.80E-01 | 1.00E+00 | -0.09 | 7.53E-01 | 9.67E-01 |
| <b>LINC00882</b>   | 0.39   | 6.73E-01 | 1.00E+00 | -0.21 | 7.53E-01 | 9.67E-01 |
| <b>PSMC1P12</b>    | NA     | NA       | NA       | 0.39  | 7.53E-01 | 9.67E-01 |
| <b>TRGV4</b>       | 1.95   | 5.65E-01 | 1.00E+00 | 0.42  | 7.53E-01 | 9.67E-01 |
| <b>MAPKBP1</b>     | -0.01  | 9.74E-01 | 1.00E+00 | 0.16  | 7.53E-01 | 9.67E-01 |
| <b>AL359715.3</b>  | -0.69  | 2.51E-01 | 1.00E+00 | -0.21 | 7.53E-01 | 9.67E-01 |
| <b>SLC39A2</b>     | 0.38   | 4.38E-01 | 1.00E+00 | 0.23  | 7.53E-01 | 9.67E-01 |
| <b>AC021224.1</b>  | -0.37  | 9.16E-01 | 1.00E+00 | 0.99  | 7.53E-01 | 9.67E-01 |
| <b>AC016065.1</b>  | -0.56  | 1.09E-01 | 1.00E+00 | 0.11  | 7.53E-01 | 9.67E-01 |
| <b>AL445645.1</b>  | -1.21  | 3.00E-01 | 1.00E+00 | 0.27  | 7.53E-01 | 9.67E-01 |
| <b>RNF5P1</b>      | -1.97  | 6.54E-02 | 1.00E+00 | 0.20  | 7.53E-01 | 9.67E-01 |
| <b>PRL</b>         | -1.74  | 6.11E-01 | 1.00E+00 | 1.01  | 7.53E-01 | 9.67E-01 |
| <b>RPS6</b>        | -0.17  | 6.43E-01 | 1.00E+00 | -0.09 | 7.53E-01 | 9.67E-01 |
| <b>CWC25</b>       | 0.43   | 8.68E-02 | 1.00E+00 | 0.08  | 7.53E-01 | 9.67E-01 |
| <b>ORMDL1</b>      | 0.13   | 7.52E-01 | 1.00E+00 | -0.14 | 7.53E-01 | 9.67E-01 |
| <b>KRT38</b>       | -19.07 | 9.57E-13 | 6.73E-10 | -1.01 | 7.53E-01 | 9.67E-01 |
| <b>ABHD8</b>       | -0.03  | 8.85E-01 | 1.00E+00 | 0.22  | 7.53E-01 | 9.67E-01 |
| <b>COL28A1</b>     | -0.06  | 9.01E-01 | 1.00E+00 | -0.21 | 7.53E-01 | 9.67E-01 |
| <b>ZGLP1</b>       | -1.30  | 4.61E-01 | 1.00E+00 | 0.33  | 7.53E-01 | 9.67E-01 |
| <b>XLOC_002282</b> | 0.53   | 5.00E-02 | 1.00E+00 | -0.12 | 7.53E-01 | 9.67E-01 |
| <b>CARMIL2</b>     | -1.88  | 1.10E-02 | 6.48E-01 | 0.99  | 7.53E-01 | 9.67E-01 |
| <b>FGF10-AS1</b>   | 1.27   | 7.13E-01 | 1.00E+00 | 0.36  | 7.53E-01 | 9.67E-01 |
| <b>XLOC_002616</b> | -1.70  | 2.60E-01 | 1.00E+00 | -0.28 | 7.53E-01 | 9.67E-01 |
| <b>TOM1L2</b>      | -0.09  | 8.06E-01 | 1.00E+00 | 0.12  | 7.53E-01 | 9.67E-01 |
| <b>AC087284.1</b>  | -0.73  | 6.72E-01 | 1.00E+00 | -0.21 | 7.53E-01 | 9.67E-01 |
| <b>MEMO1P1</b>     | 0.53   | 5.03E-01 | 1.00E+00 | -0.11 | 7.53E-01 | 9.67E-01 |
| <b>KRTAP2-2</b>    | -11.69 | 6.66E-04 | 1.23E-01 | -1.01 | 7.53E-01 | 9.67E-01 |
| <b>RBBP8NL</b>     | -0.04  | 9.14E-01 | 1.00E+00 | -0.24 | 7.54E-01 | 9.67E-01 |
| <b>CSE1L</b>       | 0.01   | 9.59E-01 | 1.00E+00 | -0.08 | 7.54E-01 | 9.67E-01 |
| <b>XLOC_005681</b> | 0.55   | 5.07E-01 | 1.00E+00 | 0.30  | 7.54E-01 | 9.67E-01 |

|              |       |          |          |       |          |          |
|--------------|-------|----------|----------|-------|----------|----------|
| PHF3         | -0.17 | 2.92E-01 | 1.00E+00 | 0.08  | 7.54E-01 | 9.67E-01 |
| AHSA1        | -0.22 | 2.61E-01 | 1.00E+00 | 0.04  | 7.54E-01 | 9.67E-01 |
| CBR4         | 0.01  | 9.79E-01 | 1.00E+00 | -0.09 | 7.54E-01 | 9.67E-01 |
| BRCA1        | 0.00  | 9.90E-01 | 1.00E+00 | 0.09  | 7.54E-01 | 9.67E-01 |
| RNF19A       | -0.12 | 4.79E-01 | 1.00E+00 | 0.06  | 7.54E-01 | 9.67E-01 |
| CCT7         | -0.11 | 5.21E-01 | 1.00E+00 | 0.05  | 7.54E-01 | 9.67E-01 |
| CENPW        | 0.11  | 6.81E-01 | 1.00E+00 | -0.10 | 7.54E-01 | 9.67E-01 |
| SNORA34      | -0.39 | 9.07E-01 | 1.00E+00 | 0.38  | 7.54E-01 | 9.67E-01 |
| UBE2H        | 0.13  | 5.02E-01 | 1.00E+00 | 0.12  | 7.54E-01 | 9.67E-01 |
| GSK3B        | -0.02 | 9.14E-01 | 1.00E+00 | -0.15 | 7.54E-01 | 9.67E-01 |
| C10orf91     | -1.16 | 1.10E-01 | 1.00E+00 | 0.28  | 7.54E-01 | 9.67E-01 |
| G37296       | -0.29 | 5.90E-01 | 1.00E+00 | 0.19  | 7.54E-01 | 9.67E-01 |
| AC108734.4   | 0.79  | 6.25E-01 | 1.00E+00 | -0.33 | 7.54E-01 | 9.67E-01 |
| SGCD         | 0.20  | 5.78E-01 | 1.00E+00 | 0.15  | 7.54E-01 | 9.67E-01 |
| RNF157       | 0.39  | 6.04E-01 | 1.00E+00 | -0.24 | 7.54E-01 | 9.67E-01 |
| AP000866.2   | -0.13 | 8.86E-01 | 1.00E+00 | -0.29 | 7.54E-01 | 9.67E-01 |
| HIST2H2BC    | 0.36  | 3.72E-01 | 1.00E+00 | -0.20 | 7.54E-01 | 9.67E-01 |
| HYAL3        | -0.27 | 6.42E-01 | 1.00E+00 | 0.15  | 7.54E-01 | 9.67E-01 |
| XLOC_014082  | 0.92  | 1.37E-01 | 1.00E+00 | -0.28 | 7.55E-01 | 9.67E-01 |
| YARS2        | -0.20 | 3.26E-01 | 1.00E+00 | 0.06  | 7.55E-01 | 9.67E-01 |
| TNFRSF19     | 0.03  | 9.37E-01 | 1.00E+00 | -0.20 | 7.55E-01 | 9.67E-01 |
| CRADD        | -0.10 | 6.07E-01 | 1.00E+00 | -0.10 | 7.55E-01 | 9.67E-01 |
| QRICH2       | 0.27  | 6.82E-01 | 1.00E+00 | 0.99  | 7.55E-01 | 9.67E-01 |
| NKAIN3-IT1   | -0.89 | 1.18E-01 | 1.00E+00 | 0.38  | 7.55E-01 | 9.67E-01 |
| HOXD1        | 0.53  | 6.04E-01 | 1.00E+00 | 0.24  | 7.55E-01 | 9.67E-01 |
| HSD3BP2      | -2.24 | 2.31E-01 | 1.00E+00 | -0.88 | 7.55E-01 | 9.67E-01 |
| RNASEH2B-AS1 | 1.02  | 5.40E-01 | 1.00E+00 | 0.30  | 7.55E-01 | 9.67E-01 |
| AL606834.2   | -0.21 | 7.44E-01 | 1.00E+00 | -0.19 | 7.55E-01 | 9.67E-01 |
| RPS15AP38    | 0.57  | 8.70E-01 | 1.00E+00 | 0.19  | 7.55E-01 | 9.67E-01 |
| VARS         | -0.41 | 1.14E-01 | 1.00E+00 | -0.17 | 7.55E-01 | 9.67E-01 |
| ZNRF2P1      | -0.30 | 3.52E-01 | 1.00E+00 | -0.31 | 7.55E-01 | 9.67E-01 |
| AC073648.6   | -1.07 | 2.70E-01 | 1.00E+00 | 0.22  | 7.55E-01 | 9.67E-01 |

|                   |       |          |          |       |          |          |
|-------------------|-------|----------|----------|-------|----------|----------|
| <b>AC017002.3</b> | 0.10  | 9.48E-01 | 1.00E+00 | -0.29 | 7.55E-01 | 9.67E-01 |
| <b>MGP</b>        | 0.55  | 3.11E-01 | 1.00E+00 | -0.15 | 7.55E-01 | 9.67E-01 |
| <b>ATP6V1E1P1</b> | NA    | NA       | NA       | -0.24 | 7.55E-01 | 9.67E-01 |
| <b>LINC01843</b>  | 0.93  | 6.79E-01 | 1.00E+00 | -0.63 | 7.55E-01 | 9.67E-01 |
| <b>AC011477.1</b> | 0.43  | 6.55E-01 | 1.00E+00 | 0.13  | 7.55E-01 | 9.67E-01 |
| <b>C7orf43</b>    | -0.40 | 3.06E-01 | 1.00E+00 | 0.20  | 7.55E-01 | 9.67E-01 |
| <b>HOXD8</b>      | 0.24  | 5.32E-01 | 1.00E+00 | 0.20  | 7.55E-01 | 9.67E-01 |
| <b>HUS1</b>       | 0.01  | 9.79E-01 | 1.00E+00 | -0.07 | 7.55E-01 | 9.67E-01 |
| <b>IRAK2</b>      | 0.47  | 2.56E-01 | 1.00E+00 | 0.18  | 7.55E-01 | 9.67E-01 |
| <b>AC026979.4</b> | -0.04 | 9.36E-01 | 1.00E+00 | 0.19  | 7.55E-01 | 9.67E-01 |
| <b>NAV3</b>       | -0.34 | 2.28E-01 | 1.00E+00 | 0.11  | 7.55E-01 | 9.67E-01 |
| <b>SUV39H1</b>    | -0.03 | 9.04E-01 | 1.00E+00 | 0.11  | 7.55E-01 | 9.67E-01 |
| <b>Z97634.1</b>   | -0.07 | 9.09E-01 | 1.00E+00 | -0.24 | 7.55E-01 | 9.67E-01 |
| <b>AC023389.2</b> | -2.89 | 3.92E-01 | 1.00E+00 | -0.57 | 7.56E-01 | 9.67E-01 |
| <b>AL137779.1</b> | 3.48  | 2.10E-02 | 8.94E-01 | -0.33 | 7.56E-01 | 9.67E-01 |
| <b>ZFX</b>        | 0.15  | 5.29E-01 | 1.00E+00 | -0.06 | 7.56E-01 | 9.67E-01 |
| <b>LTO1</b>       | 0.28  | 3.25E-01 | 1.00E+00 | -0.08 | 7.56E-01 | 9.67E-01 |
| <b>PCDHGA2</b>    | -0.52 | 2.15E-01 | 1.00E+00 | -0.18 | 7.56E-01 | 9.67E-01 |
| <b>TCEAL9</b>     | 0.04  | 8.68E-01 | 1.00E+00 | -0.07 | 7.56E-01 | 9.67E-01 |
| <b>YBX1P6</b>     | -1.18 | 1.26E-01 | 1.00E+00 | -0.20 | 7.56E-01 | 9.67E-01 |
| <b>TUSC2</b>      | 0.17  | 4.25E-01 | 1.00E+00 | 0.06  | 7.56E-01 | 9.67E-01 |
| <b>AC093904.4</b> | -2.45 | 1.22E-01 | 1.00E+00 | 0.43  | 7.56E-01 | 9.67E-01 |
| <b>SPEF2</b>      | 0.05  | 8.77E-01 | 1.00E+00 | -0.15 | 7.56E-01 | 9.67E-01 |
| <b>G11189</b>     | -1.94 | 3.44E-01 | 1.00E+00 | 0.30  | 7.56E-01 | 9.67E-01 |
| <b>EED</b>        | 0.30  | 3.11E-01 | 1.00E+00 | 0.09  | 7.56E-01 | 9.67E-01 |
| <b>AF228730.4</b> | -2.91 | 2.01E-01 | 1.00E+00 | 0.32  | 7.56E-01 | 9.67E-01 |
| <b>C3orf67</b>    | 0.17  | 7.33E-01 | 1.00E+00 | 0.22  | 7.56E-01 | 9.67E-01 |
| <b>ING5</b>       | 0.12  | 5.64E-01 | 1.00E+00 | -0.09 | 7.57E-01 | 9.67E-01 |
| <b>PRSS35</b>     | -0.38 | 5.26E-01 | 1.00E+00 | 0.32  | 7.57E-01 | 9.67E-01 |
| <b>ASB9</b>       | 0.17  | 6.61E-01 | 1.00E+00 | 0.11  | 7.57E-01 | 9.68E-01 |
| <b>LDLRAP1</b>    | -0.06 | 7.67E-01 | 1.00E+00 | -0.08 | 7.57E-01 | 9.68E-01 |
| <b>CNKSR3</b>     | -0.19 | 2.81E-01 | 1.00E+00 | 0.15  | 7.57E-01 | 9.68E-01 |

|                   |       |          |          |       |          |          |
|-------------------|-------|----------|----------|-------|----------|----------|
| <b>ARL5B</b>      | -0.21 | 6.40E-01 | 1.00E+00 | 0.12  | 7.57E-01 | 9.68E-01 |
| <b>USP1</b>       | 0.08  | 7.49E-01 | 1.00E+00 | -0.06 | 7.57E-01 | 9.68E-01 |
| <b>SDR39U1</b>    | -1.26 | 1.77E-01 | 1.00E+00 | -0.16 | 7.57E-01 | 9.68E-01 |
| <b>AL132780.1</b> | -1.26 | 4.74E-01 | 1.00E+00 | 0.26  | 7.57E-01 | 9.68E-01 |
| <b>GFOD1</b>      | -0.22 | 5.05E-01 | 1.00E+00 | 0.09  | 7.57E-01 | 9.68E-01 |
| <b>AC082651.3</b> | -0.52 | 3.40E-01 | 1.00E+00 | -0.23 | 7.57E-01 | 9.68E-01 |
| <b>ZNF843</b>     | -0.65 | 9.15E-02 | 1.00E+00 | 0.24  | 7.57E-01 | 9.68E-01 |
| <b>AP005482.3</b> | 0.34  | 6.25E-01 | 1.00E+00 | -0.13 | 7.57E-01 | 9.68E-01 |
| <b>G4338</b>      | -0.31 | 9.27E-01 | 1.00E+00 | -0.35 | 7.58E-01 | 9.68E-01 |
| <b>TMEM132C</b>   | 1.47  | 2.79E-03 | 2.73E-01 | -0.93 | 7.58E-01 | 9.68E-01 |
| <b>ADAM22</b>     | 0.36  | 3.86E-01 | 1.00E+00 | -0.20 | 7.58E-01 | 9.68E-01 |
| <b>GPATCH2</b>    | 0.07  | 8.02E-01 | 1.00E+00 | 0.06  | 7.58E-01 | 9.68E-01 |
| <b>RPL13AP20</b>  | 1.69  | 1.83E-01 | 1.00E+00 | 0.19  | 7.58E-01 | 9.68E-01 |
| <b>SERPINA12</b>  | 0.42  | 4.38E-01 | 1.00E+00 | -0.26 | 7.58E-01 | 9.68E-01 |
| <b>KRR1P1</b>     | 2.77  | 4.15E-01 | 1.00E+00 | -0.42 | 7.58E-01 | 9.68E-01 |
| <b>SOS1</b>       | -0.15 | 4.20E-01 | 1.00E+00 | -0.12 | 7.58E-01 | 9.68E-01 |
| <b>ETV1</b>       | 0.43  | 5.14E-01 | 1.00E+00 | -0.13 | 7.58E-01 | 9.68E-01 |
| <b>AC004870.1</b> | -2.69 | 2.54E-01 | 1.00E+00 | -0.49 | 7.58E-01 | 9.68E-01 |
| <b>RHEX</b>       | 1.00  | 2.36E-01 | 1.00E+00 | 0.23  | 7.58E-01 | 9.68E-01 |
| <b>RC3H1</b>      | 0.04  | 8.57E-01 | 1.00E+00 | 0.07  | 7.58E-01 | 9.68E-01 |
| <b>PRSS3</b>      | 0.07  | 8.71E-01 | 1.00E+00 | 0.24  | 7.58E-01 | 9.68E-01 |
| <b>C1orf159</b>   | -0.12 | 6.96E-01 | 1.00E+00 | 0.16  | 7.58E-01 | 9.68E-01 |
| <b>UNGP3</b>      | -0.88 | 6.27E-01 | 1.00E+00 | -0.29 | 7.58E-01 | 9.68E-01 |
| <b>EIF2S2P4</b>   | 0.15  | 7.94E-01 | 1.00E+00 | -0.12 | 7.58E-01 | 9.68E-01 |
| <b>PNPLA1</b>     | 0.10  | 8.50E-01 | 1.00E+00 | 0.18  | 7.58E-01 | 9.68E-01 |
| <b>SLC5A9</b>     | -1.36 | 3.54E-02 | 1.00E+00 | -0.26 | 7.58E-01 | 9.68E-01 |
| <b>IL13RA1</b>    | 0.06  | 8.03E-01 | 1.00E+00 | 0.15  | 7.58E-01 | 9.68E-01 |
| <b>TPT1</b>       | -0.08 | 7.79E-01 | 1.00E+00 | -0.08 | 7.58E-01 | 9.68E-01 |
| <b>DHRS3</b>      | 0.11  | 7.01E-01 | 1.00E+00 | -0.11 | 7.58E-01 | 9.68E-01 |
| <b>GRTP1</b>      | -0.11 | 7.57E-01 | 1.00E+00 | -0.14 | 7.58E-01 | 9.68E-01 |
| <b>JMJD4</b>      | -0.05 | 8.70E-01 | 1.00E+00 | 0.09  | 7.58E-01 | 9.68E-01 |
| <b>AC134682.1</b> | 0.31  | 6.83E-01 | 1.00E+00 | -0.38 | 7.58E-01 | 9.68E-01 |

|                   |       |          |          |       |          |          |
|-------------------|-------|----------|----------|-------|----------|----------|
| <b>RPL34P18</b>   | -1.53 | 4.08E-01 | 1.00E+00 | -0.25 | 7.58E-01 | 9.68E-01 |
| <b>G33346</b>     | -0.36 | 8.94E-01 | 1.00E+00 | -0.42 | 7.59E-01 | 9.68E-01 |
| <b>S100A4</b>     | -0.01 | 9.86E-01 | 1.00E+00 | 0.13  | 7.59E-01 | 9.68E-01 |
| <b>ESPL1</b>      | 0.05  | 9.08E-01 | 1.00E+00 | 0.18  | 7.59E-01 | 9.68E-01 |
| <b>SDHAF2</b>     | -0.14 | 5.61E-01 | 1.00E+00 | -0.12 | 7.59E-01 | 9.68E-01 |
| <b>ST3GAL3</b>    | -0.15 | 8.21E-01 | 1.00E+00 | 0.15  | 7.59E-01 | 9.68E-01 |
| <b>AL138785.1</b> | NA    | NA       | NA       | -0.96 | 7.59E-01 | 9.68E-01 |
| <b>EEF1A1P38</b>  | 1.50  | 6.62E-01 | 1.00E+00 | 0.28  | 7.59E-01 | 9.68E-01 |
| <b>IDH2</b>       | -0.38 | 6.57E-02 | 1.00E+00 | 0.06  | 7.59E-01 | 9.68E-01 |
| <b>FAM76A</b>     | -0.31 | 1.60E-01 | 1.00E+00 | -0.11 | 7.59E-01 | 9.68E-01 |
| <b>RDM1P5</b>     | 1.29  | 2.99E-01 | 1.00E+00 | -0.24 | 7.59E-01 | 9.68E-01 |
| <b>ZFYVE9</b>     | 0.10  | 6.25E-01 | 1.00E+00 | 0.14  | 7.59E-01 | 9.68E-01 |
| <b>COPS8</b>      | 0.21  | 1.91E-01 | 1.00E+00 | 0.10  | 7.59E-01 | 9.68E-01 |
| <b>ZNF736</b>     | 0.54  | 1.24E-01 | 1.00E+00 | 0.13  | 7.59E-01 | 9.68E-01 |
| <b>AC233279.1</b> | NA    | NA       | NA       | 0.22  | 7.59E-01 | 9.68E-01 |
| <b>ACPP</b>       | -0.17 | 7.75E-01 | 1.00E+00 | -0.18 | 7.59E-01 | 9.68E-01 |
| <b>SLC29A2</b>    | -0.18 | 5.90E-01 | 1.00E+00 | -0.19 | 7.59E-01 | 9.68E-01 |
| <b>PRICKLE1</b>   | -0.44 | 4.45E-01 | 1.00E+00 | 0.14  | 7.59E-01 | 9.68E-01 |
| <b>MOSPD2</b>     | 0.24  | 5.01E-01 | 1.00E+00 | -0.10 | 7.59E-01 | 9.68E-01 |
| <b>AKAP5</b>      | -0.47 | 3.70E-01 | 1.00E+00 | -0.25 | 7.59E-01 | 9.68E-01 |
| <b>NUPR1</b>      | 0.38  | 1.87E-01 | 1.00E+00 | 0.12  | 7.59E-01 | 9.68E-01 |
| <b>DGKB</b>       | -0.36 | 7.44E-01 | 1.00E+00 | -0.42 | 7.59E-01 | 9.68E-01 |
| <b>FAM168B</b>    | 0.21  | 4.20E-01 | 1.00E+00 | 0.08  | 7.59E-01 | 9.68E-01 |
| <b>NUBP2</b>      | -0.20 | 2.64E-01 | 1.00E+00 | 0.06  | 7.59E-01 | 9.68E-01 |
| <b>TRAPPC3L</b>   | 3.28  | 1.38E-01 | 1.00E+00 | -0.32 | 7.60E-01 | 9.68E-01 |
| <b>HNRNPAB</b>    | -0.30 | 3.13E-01 | 1.00E+00 | -0.17 | 7.60E-01 | 9.68E-01 |
| <b>IL5RA</b>      | -0.32 | 8.03E-01 | 1.00E+00 | 0.33  | 7.60E-01 | 9.68E-01 |
| <b>LINC00504</b>  | -0.32 | 5.59E-01 | 1.00E+00 | 0.13  | 7.60E-01 | 9.68E-01 |
| <b>FUCA1</b>      | 0.17  | 5.87E-01 | 1.00E+00 | 0.08  | 7.60E-01 | 9.68E-01 |
| <b>TFPI2</b>      | 1.69  | 6.23E-02 | 1.00E+00 | -0.24 | 7.60E-01 | 9.68E-01 |
| <b>SRPRA</b>      | -0.14 | 4.05E-01 | 1.00E+00 | 0.05  | 7.60E-01 | 9.68E-01 |
| <b>SLITRK5</b>    | -0.35 | 5.43E-01 | 1.00E+00 | -0.22 | 7.60E-01 | 9.68E-01 |

|             |       |          |          |       |          |          |
|-------------|-------|----------|----------|-------|----------|----------|
| STAG3L2     | -0.15 | 5.89E-01 | 1.00E+00 | -0.08 | 7.60E-01 | 9.68E-01 |
| AL117329.1  | -0.83 | 2.94E-01 | 1.00E+00 | 0.22  | 7.60E-01 | 9.68E-01 |
| ZNF730      | 0.11  | 9.55E-01 | 1.00E+00 | -0.46 | 7.60E-01 | 9.68E-01 |
| AC107952.2  | 0.33  | 8.22E-01 | 1.00E+00 | 0.36  | 7.60E-01 | 9.68E-01 |
| LSM8        | 0.35  | 2.16E-01 | 1.00E+00 | -0.08 | 7.60E-01 | 9.68E-01 |
| RAMACL      | 0.48  | 5.83E-01 | 1.00E+00 | -0.17 | 7.60E-01 | 9.68E-01 |
| LBHD1       | -1.22 | 2.82E-01 | 1.00E+00 | 0.21  | 7.60E-01 | 9.68E-01 |
| AL035448.1  | -1.29 | 5.95E-01 | 1.00E+00 | 0.35  | 7.60E-01 | 9.68E-01 |
| FAM160A2    | -0.38 | 2.60E-01 | 1.00E+00 | -0.16 | 7.60E-01 | 9.68E-01 |
| AL355312.2  | -0.72 | 6.03E-01 | 1.00E+00 | 0.23  | 7.60E-01 | 9.68E-01 |
| SGF29       | -0.10 | 7.57E-01 | 1.00E+00 | 0.08  | 7.60E-01 | 9.68E-01 |
| XLOC_002005 | 0.91  | 3.80E-01 | 1.00E+00 | 0.42  | 7.60E-01 | 9.68E-01 |
| FGF18       | -0.92 | 3.09E-01 | 1.00E+00 | 0.27  | 7.60E-01 | 9.68E-01 |
| NT5DC3      | 0.14  | 7.64E-01 | 1.00E+00 | -0.15 | 7.60E-01 | 9.68E-01 |
| MYOC        | 1.06  | 1.77E-01 | 1.00E+00 | 0.24  | 7.60E-01 | 9.68E-01 |
| AL512408.1  | -0.63 | 2.37E-01 | 1.00E+00 | -0.24 | 7.60E-01 | 9.68E-01 |
| AC022144.1  | -0.60 | 5.72E-01 | 1.00E+00 | 0.35  | 7.61E-01 | 9.68E-01 |
| ABCA3       | 0.12  | 7.74E-01 | 1.00E+00 | -0.14 | 7.61E-01 | 9.68E-01 |
| SPTB        | -0.17 | 7.12E-01 | 1.00E+00 | 0.30  | 7.61E-01 | 9.68E-01 |
| THAP3       | 0.26  | 3.52E-01 | 1.00E+00 | 0.08  | 7.61E-01 | 9.68E-01 |
| ZNF837      | -0.10 | 7.10E-01 | 1.00E+00 | -0.27 | 7.61E-01 | 9.68E-01 |
| IRX5        | -0.25 | 4.47E-01 | 1.00E+00 | -0.17 | 7.61E-01 | 9.68E-01 |
| PPP1R12B    | -0.07 | 8.86E-01 | 1.00E+00 | 0.14  | 7.61E-01 | 9.68E-01 |
| SLC26A8     | -1.13 | 7.40E-01 | 1.00E+00 | 0.42  | 7.61E-01 | 9.69E-01 |
| SPHKAP      | -4.14 | 1.00E-04 | 2.46E-02 | -0.97 | 7.61E-01 | 9.69E-01 |
| AL080250.1  | 0.01  | 9.85E-01 | 1.00E+00 | 0.19  | 7.61E-01 | 9.69E-01 |
| F2RL1       | 0.26  | 6.45E-01 | 1.00E+00 | 0.16  | 7.61E-01 | 9.69E-01 |
| XLOC_010588 | -0.37 | 7.78E-01 | 1.00E+00 | -0.30 | 7.61E-01 | 9.69E-01 |
| AC092620.2  | 0.25  | 8.75E-01 | 1.00E+00 | -0.36 | 7.61E-01 | 9.69E-01 |
| GOLGA8H     | 0.62  | 5.84E-01 | 1.00E+00 | 0.18  | 7.61E-01 | 9.69E-01 |
| LSM1        | 0.07  | 8.23E-01 | 1.00E+00 | 0.09  | 7.62E-01 | 9.69E-01 |
| PYCARD      | -0.27 | 4.25E-01 | 1.00E+00 | 0.12  | 7.62E-01 | 9.69E-01 |

|                    |       |          |          |       |          |          |
|--------------------|-------|----------|----------|-------|----------|----------|
| <b>G17182</b>      | -0.09 | 9.39E-01 | 1.00E+00 | 0.95  | 7.62E-01 | 9.69E-01 |
| <b>PPP1R26-AS1</b> | -0.26 | 6.58E-01 | 1.00E+00 | -0.25 | 7.62E-01 | 9.69E-01 |
| <b>AC091057.2</b>  | 0.40  | 8.67E-01 | 1.00E+00 | -0.19 | 7.62E-01 | 9.69E-01 |
| <b>AC010478.1</b>  | 0.25  | 8.01E-01 | 1.00E+00 | -0.39 | 7.62E-01 | 9.69E-01 |
| <b>MYL6P3</b>      | NA    | NA       | NA       | 0.25  | 7.62E-01 | 9.69E-01 |
| <b>MUC15</b>       | 0.13  | 7.37E-01 | 1.00E+00 | -0.19 | 7.62E-01 | 9.69E-01 |
| <b>CFAP161</b>     | -1.35 | 4.08E-01 | 1.00E+00 | 0.24  | 7.62E-01 | 9.69E-01 |
| <b>AC004884.2</b>  | 0.32  | 9.28E-01 | 1.00E+00 | -0.24 | 7.62E-01 | 9.69E-01 |
| <b>PIGW</b>        | -0.24 | 3.40E-01 | 1.00E+00 | 0.07  | 7.62E-01 | 9.69E-01 |
| <b>PPFIBP2</b>     | -0.10 | 6.14E-01 | 1.00E+00 | 0.10  | 7.62E-01 | 9.69E-01 |
| <b>AL133243.2</b>  | 1.01  | 3.08E-01 | 1.00E+00 | 0.22  | 7.62E-01 | 9.69E-01 |
| <b>TWF1</b>        | -0.17 | 5.48E-01 | 1.00E+00 | 0.06  | 7.62E-01 | 9.69E-01 |
| <b>PIP4K2C</b>     | -0.15 | 4.73E-01 | 1.00E+00 | 0.06  | 7.62E-01 | 9.69E-01 |
| <b>RPL15P3</b>     | 0.06  | 8.62E-01 | 1.00E+00 | 0.21  | 7.62E-01 | 9.69E-01 |
| <b>G2582</b>       | 0.24  | 8.44E-01 | 1.00E+00 | -0.24 | 7.62E-01 | 9.69E-01 |
| <b>RPL7AP30</b>    | -0.50 | 5.01E-01 | 1.00E+00 | -0.13 | 7.63E-01 | 9.69E-01 |
| <b>PDE4D</b>       | -0.30 | 2.22E-01 | 1.00E+00 | 0.08  | 7.63E-01 | 9.69E-01 |
| <b>VEPH1</b>       | -0.40 | 2.30E-01 | 1.00E+00 | 0.15  | 7.63E-01 | 9.69E-01 |
| <b>AC010733.1</b>  | -0.02 | 9.86E-01 | 1.00E+00 | -0.22 | 7.63E-01 | 9.69E-01 |
| <b>GAPVD1</b>      | 0.00  | 9.94E-01 | 1.00E+00 | -0.06 | 7.63E-01 | 9.69E-01 |
| <b>C12orf56</b>    | 0.15  | 8.77E-01 | 1.00E+00 | 0.20  | 7.63E-01 | 9.69E-01 |
| <b>SS18L2</b>      | -0.06 | 8.53E-01 | 1.00E+00 | -0.12 | 7.63E-01 | 9.69E-01 |
| <b>ARHGEF34P</b>   | 0.59  | 2.52E-01 | 1.00E+00 | 0.18  | 7.63E-01 | 9.69E-01 |
| <b>AL121985.1</b>  | 0.36  | 9.17E-01 | 1.00E+00 | -0.42 | 7.63E-01 | 9.69E-01 |
| <b>FNIP1</b>       | 0.17  | 4.71E-01 | 1.00E+00 | 0.06  | 7.63E-01 | 9.69E-01 |
| <b>ANKH</b>        | 0.11  | 6.53E-01 | 1.00E+00 | -0.11 | 7.63E-01 | 9.69E-01 |
| <b>NUDT21</b>      | 0.04  | 8.49E-01 | 1.00E+00 | -0.04 | 7.63E-01 | 9.69E-01 |
| <b>TRBV11-2</b>    | 0.09  | 9.64E-01 | 1.00E+00 | 0.43  | 7.63E-01 | 9.69E-01 |
| <b>TXLNGY</b>      | 0.44  | 5.25E-01 | 1.00E+00 | -0.21 | 7.63E-01 | 9.69E-01 |
| <b>ZMAT5</b>       | 0.18  | 4.69E-01 | 1.00E+00 | 0.08  | 7.63E-01 | 9.69E-01 |
| <b>KIAA1755</b>    | -0.29 | 5.51E-01 | 1.00E+00 | 0.94  | 7.63E-01 | 9.69E-01 |
| <b>SERBP1P6</b>    | -2.14 | 4.14E-01 | 1.00E+00 | -0.18 | 7.63E-01 | 9.69E-01 |



|                   |       |          |          |       |          |          |
|-------------------|-------|----------|----------|-------|----------|----------|
| <b>CCDC174</b>    | 0.12  | 5.30E-01 | 1.00E+00 | -0.07 | 7.63E-01 | 9.69E-01 |
| <b>ATG16L1</b>    | 0.25  | 2.16E-01 | 1.00E+00 | 0.06  | 7.63E-01 | 9.69E-01 |
| <b>AC025171.5</b> | -0.62 | 7.66E-01 | 1.00E+00 | -0.43 | 7.63E-01 | 9.69E-01 |
| <b>NDUFV1</b>     | -0.12 | 5.85E-01 | 1.00E+00 | -0.04 | 7.63E-01 | 9.69E-01 |
| <b>C1orf68</b>    | 0.57  | 3.51E-01 | 1.00E+00 | 0.94  | 7.64E-01 | 9.69E-01 |
| <b>GALNT8</b>     | 1.18  | 8.32E-02 | 1.00E+00 | -0.26 | 7.64E-01 | 9.69E-01 |
| <b>FAM20B</b>     | 0.04  | 8.17E-01 | 1.00E+00 | -0.12 | 7.64E-01 | 9.69E-01 |
| <b>AL035681.1</b> | 0.65  | 3.53E-01 | 1.00E+00 | -0.27 | 7.64E-01 | 9.69E-01 |
| <b>GLRX</b>       | 0.14  | 5.71E-01 | 1.00E+00 | 0.08  | 7.64E-01 | 9.69E-01 |
| <b>TLR5</b>       | 0.37  | 4.41E-01 | 1.00E+00 | 0.09  | 7.64E-01 | 9.69E-01 |
| <b>JAK2</b>       | 0.11  | 6.74E-01 | 1.00E+00 | 0.13  | 7.64E-01 | 9.69E-01 |
| <b>SPTBN1</b>     | 0.07  | 8.33E-01 | 1.00E+00 | 0.12  | 7.64E-01 | 9.69E-01 |
| <b>2-Mar</b>      | 0.89  | 1.42E-01 | 1.00E+00 | -0.22 | 7.64E-01 | 9.69E-01 |
| <b>MORN1</b>      | -0.26 | 3.55E-01 | 1.00E+00 | -0.12 | 7.64E-01 | 9.69E-01 |
| <b>AL513534.1</b> | 0.52  | 5.86E-01 | 1.00E+00 | -0.21 | 7.64E-01 | 9.69E-01 |
| <b>AC011294.1</b> | 1.36  | 3.29E-01 | 1.00E+00 | -0.96 | 7.64E-01 | 9.69E-01 |
| <b>AC131212.3</b> | -0.57 | 4.67E-01 | 1.00E+00 | 0.95  | 7.64E-01 | 9.69E-01 |
| <b>STYXL1</b>     | -0.18 | 4.28E-01 | 1.00E+00 | 0.08  | 7.64E-01 | 9.69E-01 |
| <b>AC004453.1</b> | -0.66 | 4.08E-01 | 1.00E+00 | 0.25  | 7.64E-01 | 9.69E-01 |
| <b>AC018628.1</b> | 0.15  | 8.79E-01 | 1.00E+00 | -0.18 | 7.64E-01 | 9.69E-01 |
| <b>G40536</b>     | -0.85 | 2.71E-01 | 1.00E+00 | -0.35 | 7.64E-01 | 9.69E-01 |
| <b>KLC4</b>       | -0.21 | 4.65E-01 | 1.00E+00 | -0.08 | 7.64E-01 | 9.69E-01 |
| <b>CNTFR</b>      | 1.56  | 6.96E-04 | 1.25E-01 | 0.22  | 7.64E-01 | 9.69E-01 |
| <b>AC005224.1</b> | -1.82 | 2.12E-01 | 1.00E+00 | 0.30  | 7.64E-01 | 9.69E-01 |
| <b>TIGD1</b>      | -0.65 | 1.88E-01 | 1.00E+00 | 0.16  | 7.65E-01 | 9.69E-01 |
| <b>DOCK11</b>     | 0.72  | 1.81E-01 | 1.00E+00 | 0.18  | 7.65E-01 | 9.69E-01 |
| <b>C1orf56</b>    | 0.04  | 8.85E-01 | 1.00E+00 | 0.08  | 7.65E-01 | 9.69E-01 |
| <b>DYNLL1</b>     | 0.09  | 7.82E-01 | 1.00E+00 | 0.09  | 7.65E-01 | 9.69E-01 |
| <b>CLDN20</b>     | 1.15  | 4.25E-01 | 1.00E+00 | 0.37  | 7.65E-01 | 9.69E-01 |
| <b>TRAPPC5</b>    | -0.66 | 3.28E-01 | 1.00E+00 | 0.23  | 7.65E-01 | 9.69E-01 |
| <b>AC007390.2</b> | -1.98 | 8.44E-02 | 1.00E+00 | 0.18  | 7.65E-01 | 9.69E-01 |
| <b>CCDC74A</b>    | 0.18  | 5.73E-01 | 1.00E+00 | 0.09  | 7.65E-01 | 9.69E-01 |

|                      |       |          |          |       |          |          |
|----------------------|-------|----------|----------|-------|----------|----------|
| <b>RRN3P3</b>        | 0.17  | 6.90E-01 | 1.00E+00 | 0.12  | 7.65E-01 | 9.69E-01 |
| <b>CCDC144NL-AS1</b> | 0.80  | 2.35E-01 | 1.00E+00 | 0.20  | 7.65E-01 | 9.69E-01 |
| <b>SLC51B</b>        | -0.25 | 6.54E-01 | 1.00E+00 | 0.28  | 7.65E-01 | 9.69E-01 |
| <b>TBCC</b>          | -0.09 | 6.73E-01 | 1.00E+00 | 0.10  | 7.65E-01 | 9.69E-01 |
| <b>AC015922.2</b>    | 0.40  | 5.23E-01 | 1.00E+00 | 0.22  | 7.65E-01 | 9.69E-01 |
| <b>OST4</b>          | 0.03  | 8.78E-01 | 1.00E+00 | -0.14 | 7.65E-01 | 9.69E-01 |
| <b>VPS13B</b>        | -0.03 | 8.65E-01 | 1.00E+00 | 0.12  | 7.65E-01 | 9.69E-01 |
| <b>LINC02574</b>     | -1.64 | 3.63E-01 | 1.00E+00 | 0.37  | 7.65E-01 | 9.69E-01 |
| <b>EEF1A2</b>        | -0.55 | 1.42E-01 | 1.00E+00 | -0.28 | 7.65E-01 | 9.69E-01 |
| <b>KIF18B</b>        | -0.02 | 9.48E-01 | 1.00E+00 | 0.22  | 7.65E-01 | 9.69E-01 |
| <b>ZBTB20</b>        | 0.36  | 3.71E-01 | 1.00E+00 | -0.13 | 7.65E-01 | 9.69E-01 |
| <b>MSI2</b>          | -0.19 | 4.82E-01 | 1.00E+00 | 0.13  | 7.65E-01 | 9.69E-01 |
| <b>DQX1</b>          | -0.37 | 3.95E-01 | 1.00E+00 | -0.28 | 7.65E-01 | 9.69E-01 |
| <b>SLX4IP</b>        | 0.26  | 4.26E-01 | 1.00E+00 | -0.11 | 7.65E-01 | 9.69E-01 |
| <b>SLC9A7P1</b>      | 0.84  | 4.18E-01 | 1.00E+00 | -0.26 | 7.65E-01 | 9.69E-01 |
| <b>RGS13</b>         | 0.61  | 3.95E-01 | 1.00E+00 | -0.17 | 7.65E-01 | 9.69E-01 |
| <b>RBM8A</b>         | -0.05 | 7.96E-01 | 1.00E+00 | -0.09 | 7.65E-01 | 9.69E-01 |
| <b>KRTAP19-1</b>     | -2.55 | 2.52E-01 | 1.00E+00 | -0.96 | 7.65E-01 | 9.69E-01 |
| <b>PARVA</b>         | 0.15  | 6.93E-01 | 1.00E+00 | -0.11 | 7.66E-01 | 9.69E-01 |
| <b>AC012313.1</b>    | -0.26 | 3.26E-01 | 1.00E+00 | 0.27  | 7.66E-01 | 9.69E-01 |
| <b>UBE2Q2P1</b>      | 0.20  | 6.98E-01 | 1.00E+00 | -0.10 | 7.66E-01 | 9.69E-01 |
| <b>GEMIN5</b>        | 0.21  | 3.43E-01 | 1.00E+00 | 0.09  | 7.66E-01 | 9.69E-01 |
| <b>ZSCAN21</b>       | -0.09 | 6.85E-01 | 1.00E+00 | -0.07 | 7.66E-01 | 9.70E-01 |
| <b>RPS3AP34</b>      | 0.03  | 9.77E-01 | 1.00E+00 | 0.25  | 7.66E-01 | 9.70E-01 |
| <b>XLOC_001023</b>   | -0.44 | 2.98E-01 | 1.00E+00 | -0.12 | 7.66E-01 | 9.70E-01 |
| <b>SLC5A2</b>        | -1.22 | 4.58E-01 | 1.00E+00 | 0.28  | 7.66E-01 | 9.70E-01 |
| <b>TEX9</b>          | -0.32 | 4.70E-01 | 1.00E+00 | -0.11 | 7.66E-01 | 9.70E-01 |
| <b>TUBA4B</b>        | 1.09  | 3.58E-01 | 1.00E+00 | 0.28  | 7.66E-01 | 9.70E-01 |
| <b>GSX2</b>          | -0.32 | 7.65E-01 | 1.00E+00 | -0.50 | 7.66E-01 | 9.70E-01 |
| <b>PRDX4</b>         | 0.01  | 9.77E-01 | 1.00E+00 | -0.09 | 7.66E-01 | 9.70E-01 |
| <b>CEP131</b>        | -0.27 | 3.34E-01 | 1.00E+00 | -0.16 | 7.66E-01 | 9.70E-01 |
| <b>FBXL6</b>         | -0.56 | 5.45E-02 | 1.00E+00 | -0.18 | 7.66E-01 | 9.70E-01 |

|            |       |          |          |       |          |          |
|------------|-------|----------|----------|-------|----------|----------|
| ATAD3C     | -0.64 | 2.60E-01 | 1.00E+00 | 0.14  | 7.66E-01 | 9.70E-01 |
| SLC2A14    | -2.96 | 3.68E-02 | 1.00E+00 | -0.94 | 7.66E-01 | 9.70E-01 |
| KIFC1      | -0.08 | 7.97E-01 | 1.00E+00 | 0.17  | 7.66E-01 | 9.70E-01 |
| SNRPEP4    | 1.09  | 4.73E-01 | 1.00E+00 | -0.17 | 7.66E-01 | 9.70E-01 |
| AL626787.1 | -2.64 | 1.04E-01 | 1.00E+00 | 0.33  | 7.66E-01 | 9.70E-01 |
| TMEM65     | -0.10 | 6.68E-01 | 1.00E+00 | -0.12 | 7.66E-01 | 9.70E-01 |
| CCL14      | 0.58  | 5.83E-01 | 1.00E+00 | 0.28  | 7.66E-01 | 9.70E-01 |
| C17orf53   | -0.09 | 8.03E-01 | 1.00E+00 | 0.13  | 7.66E-01 | 9.70E-01 |
| RTCB       | -0.10 | 7.25E-01 | 1.00E+00 | 0.06  | 7.67E-01 | 9.70E-01 |
| RPAIN      | 0.27  | 3.32E-01 | 1.00E+00 | -0.08 | 7.67E-01 | 9.70E-01 |
| LINC01117  | -0.89 | 4.81E-01 | 1.00E+00 | 0.18  | 7.67E-01 | 9.70E-01 |
| STARD5     | 0.34  | 5.54E-01 | 1.00E+00 | 0.13  | 7.67E-01 | 9.70E-01 |
| KHNYN      | 0.05  | 8.69E-01 | 1.00E+00 | 0.15  | 7.67E-01 | 9.70E-01 |
| EIF3E      | 0.00  | 9.98E-01 | 1.00E+00 | 0.07  | 7.67E-01 | 9.70E-01 |
| PCBP4      | -0.11 | 5.86E-01 | 1.00E+00 | -0.12 | 7.67E-01 | 9.70E-01 |
| PNCK       | -0.85 | 1.92E-01 | 1.00E+00 | -0.26 | 7.67E-01 | 9.70E-01 |
| PNPO       | 0.09  | 7.64E-01 | 1.00E+00 | -0.08 | 7.67E-01 | 9.70E-01 |
| ABLIM1     | 0.20  | 4.35E-01 | 1.00E+00 | 0.08  | 7.67E-01 | 9.70E-01 |
| FBXO22     | 0.11  | 7.45E-01 | 1.00E+00 | -0.09 | 7.67E-01 | 9.70E-01 |
| DLGAP4-AS1 | -1.00 | 2.63E-01 | 1.00E+00 | 0.31  | 7.67E-01 | 9.70E-01 |
| AC005840.1 | NA    | NA       | NA       | 0.39  | 7.67E-01 | 9.70E-01 |
| MFSD12     | -0.64 | 4.46E-02 | 1.00E+00 | 0.18  | 7.67E-01 | 9.70E-01 |
| UBA6       | 0.01  | 9.70E-01 | 1.00E+00 | 0.07  | 7.67E-01 | 9.70E-01 |
| CSDC2      | -0.94 | 1.17E-01 | 1.00E+00 | 0.71  | 7.67E-01 | 9.70E-01 |
| DOK6       | -0.18 | 7.46E-01 | 1.00E+00 | 0.22  | 7.67E-01 | 9.70E-01 |
| AC087521.1 | -4.34 | 8.46E-05 | 2.17E-02 | 0.34  | 7.67E-01 | 9.70E-01 |
| SMTNL2     | 0.72  | 3.11E-01 | 1.00E+00 | 0.83  | 7.67E-01 | 9.70E-01 |
| 11-Sep     | 0.52  | 2.66E-01 | 1.00E+00 | -0.13 | 7.67E-01 | 9.70E-01 |
| MEOX1      | -0.07 | 8.95E-01 | 1.00E+00 | -0.16 | 7.67E-01 | 9.70E-01 |
| ORM1       | NA    | NA       | NA       | 0.95  | 7.67E-01 | 9.70E-01 |
| GORASP2    | -0.13 | 4.90E-01 | 1.00E+00 | -0.05 | 7.67E-01 | 9.70E-01 |
| AL157394.1 | 0.82  | 2.23E-01 | 1.00E+00 | -0.23 | 7.67E-01 | 9.70E-01 |

|                   |       |          |          |       |          |          |
|-------------------|-------|----------|----------|-------|----------|----------|
| <b>ADD1</b>       | 0.07  | 7.82E-01 | 1.00E+00 | 0.12  | 7.67E-01 | 9.70E-01 |
| <b>RIOK2</b>      | 0.05  | 8.26E-01 | 1.00E+00 | -0.08 | 7.68E-01 | 9.70E-01 |
| <b>SLC30A2</b>    | -1.14 | 1.22E-01 | 1.00E+00 | 0.29  | 7.68E-01 | 9.70E-01 |
| <b>APBB2</b>      | 0.31  | 3.29E-01 | 1.00E+00 | 0.10  | 7.68E-01 | 9.70E-01 |
| <b>RPL21P28</b>   | -0.27 | 5.70E-01 | 1.00E+00 | -0.20 | 7.68E-01 | 9.70E-01 |
| <b>SLC37A4</b>    | -0.05 | 8.67E-01 | 1.00E+00 | -0.07 | 7.68E-01 | 9.70E-01 |
| <b>DBNDD1</b>     | -0.04 | 8.96E-01 | 1.00E+00 | -0.19 | 7.68E-01 | 9.70E-01 |
| <b>TRIM4</b>      | 0.43  | 1.42E-02 | 7.51E-01 | 0.05  | 7.68E-01 | 9.70E-01 |
| <b>RILPL1</b>     | -0.32 | 1.20E-01 | 1.00E+00 | 0.18  | 7.68E-01 | 9.70E-01 |
| <b>ERCC4</b>      | 0.20  | 4.18E-01 | 1.00E+00 | 0.07  | 7.68E-01 | 9.70E-01 |
| <b>GALNT16</b>    | 0.48  | 3.12E-01 | 1.00E+00 | 0.18  | 7.68E-01 | 9.70E-01 |
| <b>ORMDL3</b>     | 0.49  | 1.37E-01 | 1.00E+00 | -0.09 | 7.68E-01 | 9.70E-01 |
| <b>FAM117B</b>    | -0.22 | 4.64E-01 | 1.00E+00 | -0.11 | 7.68E-01 | 9.70E-01 |
| <b>RALA</b>       | 0.24  | 2.01E-01 | 1.00E+00 | 0.05  | 7.68E-01 | 9.70E-01 |
| <b>VEGFA</b>      | -0.25 | 4.37E-01 | 1.00E+00 | -0.23 | 7.68E-01 | 9.70E-01 |
| <b>CCDC97</b>     | -0.11 | 5.70E-01 | 1.00E+00 | 0.10  | 7.68E-01 | 9.70E-01 |
| <b>ADAT2</b>      | 0.05  | 9.18E-01 | 1.00E+00 | 0.09  | 7.68E-01 | 9.70E-01 |
| <b>RPL23AP65</b>  | -1.60 | 3.93E-01 | 1.00E+00 | 0.30  | 7.68E-01 | 9.70E-01 |
| <b>TFRC</b>       | 0.19  | 5.32E-01 | 1.00E+00 | 0.11  | 7.68E-01 | 9.70E-01 |
| <b>TEDC2</b>      | -0.99 | 1.82E-02 | 8.48E-01 | -0.21 | 7.68E-01 | 9.70E-01 |
| <b>AC007750.1</b> | -0.80 | 8.18E-01 | 1.00E+00 | -0.74 | 7.68E-01 | 9.70E-01 |
| <b>THSD4</b>      | -0.03 | 9.40E-01 | 1.00E+00 | -0.12 | 7.68E-01 | 9.70E-01 |
| <b>DEF8</b>       | -0.08 | 6.95E-01 | 1.00E+00 | 0.05  | 7.68E-01 | 9.70E-01 |
| <b>FTCDNL1</b>    | -0.07 | 8.60E-01 | 1.00E+00 | 0.12  | 7.69E-01 | 9.70E-01 |
| <b>PROM2</b>      | -0.30 | 3.96E-01 | 1.00E+00 | 0.18  | 7.69E-01 | 9.70E-01 |
| <b>LINC00659</b>  | -0.49 | 8.87E-01 | 1.00E+00 | 0.47  | 7.69E-01 | 9.70E-01 |
| <b>DEPDC1B</b>    | 0.29  | 5.09E-01 | 1.00E+00 | 0.13  | 7.69E-01 | 9.70E-01 |
| <b>PLXNB3</b>     | -0.29 | 4.68E-01 | 1.00E+00 | 0.28  | 7.69E-01 | 9.70E-01 |
| <b>ZNF550</b>     | 0.20  | 6.31E-01 | 1.00E+00 | 0.11  | 7.69E-01 | 9.70E-01 |
| <b>RBM22</b>      | -0.16 | 2.71E-01 | 1.00E+00 | -0.04 | 7.69E-01 | 9.70E-01 |
| <b>EHF</b>        | 0.16  | 6.35E-01 | 1.00E+00 | 0.13  | 7.69E-01 | 9.70E-01 |
| <b>C16orf96</b>   | -0.87 | 3.16E-01 | 1.00E+00 | 0.38  | 7.69E-01 | 9.70E-01 |

|             |       |          |          |       |          |          |
|-------------|-------|----------|----------|-------|----------|----------|
| TGS1        | -0.16 | 3.26E-01 | 1.00E+00 | 0.05  | 7.69E-01 | 9.70E-01 |
| UAP1        | 0.48  | 1.93E-01 | 1.00E+00 | 0.13  | 7.69E-01 | 9.70E-01 |
| C17orf50    | -0.26 | 7.88E-01 | 1.00E+00 | 0.32  | 7.69E-01 | 9.70E-01 |
| SUMO2P1     | 0.82  | 4.43E-01 | 1.00E+00 | -0.12 | 7.69E-01 | 9.70E-01 |
| TMEM255A    | 0.53  | 2.88E-01 | 1.00E+00 | -0.13 | 7.69E-01 | 9.70E-01 |
| RHBDF1      | -0.05 | 8.36E-01 | 1.00E+00 | 0.14  | 7.69E-01 | 9.70E-01 |
| AL035252.3  | 1.25  | 3.78E-01 | 1.00E+00 | 0.40  | 7.69E-01 | 9.70E-01 |
| XLOC_002198 | -0.98 | 2.87E-01 | 1.00E+00 | 0.20  | 7.69E-01 | 9.70E-01 |
| AC002553.1  | -0.42 | 7.09E-01 | 1.00E+00 | -0.21 | 7.69E-01 | 9.70E-01 |
| MBNL2       | 0.02  | 9.43E-01 | 1.00E+00 | -0.08 | 7.69E-01 | 9.70E-01 |
| HBQ1        | -1.31 | 3.57E-01 | 1.00E+00 | 0.42  | 7.69E-01 | 9.70E-01 |
| PHC3        | -0.16 | 4.97E-01 | 1.00E+00 | 0.08  | 7.69E-01 | 9.70E-01 |
| LRRTM3      | -0.56 | 7.56E-01 | 1.00E+00 | -0.46 | 7.69E-01 | 9.70E-01 |
| AL022328.4  | -0.04 | 9.47E-01 | 1.00E+00 | 0.34  | 7.69E-01 | 9.70E-01 |
| HIST3H2BB   | -2.33 | 1.53E-02 | 7.66E-01 | -0.18 | 7.69E-01 | 9.70E-01 |
| CYP4F11     | 0.14  | 7.49E-01 | 1.00E+00 | 0.24  | 7.70E-01 | 9.70E-01 |
| SRGAP2B     | -0.02 | 9.58E-01 | 1.00E+00 | 0.13  | 7.70E-01 | 9.70E-01 |
| AC005726.1  | -0.35 | 5.46E-01 | 1.00E+00 | 0.26  | 7.70E-01 | 9.70E-01 |
| HIST1H2AG   | -0.97 | 1.25E-01 | 1.00E+00 | 0.24  | 7.70E-01 | 9.70E-01 |
| RAB11FIP1P1 | 0.18  | 9.06E-01 | 1.00E+00 | -0.39 | 7.70E-01 | 9.70E-01 |
| DSE         | 0.06  | 8.05E-01 | 1.00E+00 | 0.09  | 7.70E-01 | 9.70E-01 |
| G16985      | -3.68 | 2.30E-02 | 9.12E-01 | -0.22 | 7.70E-01 | 9.70E-01 |
| MTHFD1      | 0.17  | 4.14E-01 | 1.00E+00 | -0.08 | 7.70E-01 | 9.70E-01 |
| RBFA        | 0.09  | 7.46E-01 | 1.00E+00 | -0.08 | 7.70E-01 | 9.70E-01 |
| E2F6        | 0.17  | 4.29E-01 | 1.00E+00 | -0.13 | 7.70E-01 | 9.70E-01 |
| BTLA        | -1.09 | 2.46E-01 | 1.00E+00 | -0.29 | 7.70E-01 | 9.70E-01 |
| TET3        | -0.14 | 7.59E-01 | 1.00E+00 | 0.16  | 7.70E-01 | 9.70E-01 |
| AL589843.1  | -0.12 | 8.56E-01 | 1.00E+00 | 0.17  | 7.70E-01 | 9.70E-01 |
| PTGS1       | 0.25  | 5.83E-01 | 1.00E+00 | -0.12 | 7.70E-01 | 9.70E-01 |
| IGSF8       | -0.37 | 2.52E-01 | 1.00E+00 | 0.10  | 7.70E-01 | 9.70E-01 |
| OGN         | 1.49  | 4.60E-02 | 1.00E+00 | 0.19  | 7.70E-01 | 9.70E-01 |
| LINC01426   | 1.57  | 2.54E-01 | 1.00E+00 | 0.27  | 7.70E-01 | 9.70E-01 |

|                    |       |          |          |       |          |          |
|--------------------|-------|----------|----------|-------|----------|----------|
| <b>CYP26B1</b>     | 0.41  | 1.81E-01 | 1.00E+00 | 0.16  | 7.70E-01 | 9.70E-01 |
| <b>ZNF672</b>      | -0.29 | 2.12E-01 | 1.00E+00 | 0.14  | 7.70E-01 | 9.70E-01 |
| <b>RBM11</b>       | -0.73 | 3.49E-01 | 1.00E+00 | -0.21 | 7.70E-01 | 9.70E-01 |
| <b>CBL</b>         | 0.17  | 5.01E-01 | 1.00E+00 | 0.09  | 7.70E-01 | 9.70E-01 |
| <b>OR1L8</b>       | -2.13 | 1.63E-01 | 1.00E+00 | -0.33 | 7.70E-01 | 9.70E-01 |
| <b>BTBD16</b>      | 0.11  | 8.33E-01 | 1.00E+00 | -0.22 | 7.70E-01 | 9.70E-01 |
| <b>PDF</b>         | -0.89 | 3.44E-02 | 1.00E+00 | 0.20  | 7.70E-01 | 9.70E-01 |
| <b>AC130686.1</b>  | -0.75 | 5.77E-01 | 1.00E+00 | -0.45 | 7.70E-01 | 9.70E-01 |
| <b>PTGIS</b>       | 0.47  | 3.37E-01 | 1.00E+00 | 0.18  | 7.70E-01 | 9.70E-01 |
| <b>LINC02009</b>   | 1.92  | 4.39E-01 | 1.00E+00 | 0.35  | 7.71E-01 | 9.70E-01 |
| <b>ALG1L2</b>      | -0.76 | 3.42E-01 | 1.00E+00 | -0.19 | 7.71E-01 | 9.70E-01 |
| <b>TM4SF4</b>      | -3.45 | 1.98E-02 | 8.80E-01 | -0.43 | 7.71E-01 | 9.70E-01 |
| <b>CACNA1I</b>     | -1.85 | 3.55E-02 | 1.00E+00 | 0.92  | 7.71E-01 | 9.70E-01 |
| <b>AC104837.1</b>  | NA    | NA       | NA       | 0.21  | 7.71E-01 | 9.70E-01 |
| <b>XLOC_001935</b> | -3.75 | 1.08E-02 | 6.42E-01 | -0.32 | 7.71E-01 | 9.70E-01 |
| <b>CILP</b>        | 1.22  | 1.37E-01 | 1.00E+00 | -0.20 | 7.71E-01 | 9.70E-01 |
| <b>AC092614.1</b>  | 1.31  | 1.16E-01 | 1.00E+00 | 0.27  | 7.71E-01 | 9.70E-01 |
| <b>TMEM41A</b>     | 0.23  | 3.04E-01 | 1.00E+00 | -0.06 | 7.71E-01 | 9.70E-01 |
| <b>AC006273.1</b>  | -0.75 | 6.20E-01 | 1.00E+00 | -0.27 | 7.71E-01 | 9.70E-01 |
| <b>GPRASP1</b>     | 0.27  | 5.22E-01 | 1.00E+00 | 0.19  | 7.71E-01 | 9.70E-01 |
| <b>EXO1</b>        | -0.32 | 3.33E-01 | 1.00E+00 | -0.15 | 7.71E-01 | 9.70E-01 |
| <b>DPAGT1</b>      | -0.02 | 9.41E-01 | 1.00E+00 | -0.07 | 7.71E-01 | 9.70E-01 |
| <b>MPPED2</b>      | 0.39  | 5.41E-01 | 1.00E+00 | -0.21 | 7.71E-01 | 9.70E-01 |
| <b>NOL10</b>       | -0.06 | 7.39E-01 | 1.00E+00 | -0.07 | 7.71E-01 | 9.70E-01 |
| <b>AC013476.1</b>  | -1.58 | 6.01E-01 | 1.00E+00 | 0.24  | 7.71E-01 | 9.70E-01 |
| <b>C19orf18</b>    | 0.30  | 7.76E-01 | 1.00E+00 | 0.18  | 7.71E-01 | 9.70E-01 |
| <b>UBE2G2</b>      | -0.18 | 2.72E-01 | 1.00E+00 | 0.05  | 7.71E-01 | 9.70E-01 |
| <b>U47924.2</b>    | 0.56  | 8.71E-01 | 1.00E+00 | -0.27 | 7.71E-01 | 9.70E-01 |
| <b>ACA64</b>       | -2.28 | 1.78E-01 | 1.00E+00 | 0.34  | 7.71E-01 | 9.70E-01 |
| <b>SLC30A9</b>     | 0.06  | 6.86E-01 | 1.00E+00 | -0.05 | 7.71E-01 | 9.70E-01 |
| <b>TLR10</b>       | -0.37 | 7.46E-01 | 1.00E+00 | 0.25  | 7.72E-01 | 9.70E-01 |
| <b>G25251</b>      | 0.25  | 8.65E-01 | 1.00E+00 | 0.45  | 7.72E-01 | 9.70E-01 |

|                   |       |          |          |       |          |          |
|-------------------|-------|----------|----------|-------|----------|----------|
| <b>THAP7-AS1</b>  | -0.20 | 6.40E-01 | 1.00E+00 | 0.13  | 7.72E-01 | 9.70E-01 |
| <b>ARHGAP24</b>   | -0.34 | 1.88E-01 | 1.00E+00 | -0.09 | 7.72E-01 | 9.70E-01 |
| <b>CSTF2</b>      | 0.21  | 4.87E-01 | 1.00E+00 | 0.08  | 7.72E-01 | 9.70E-01 |
| <b>EMB</b>        | -0.12 | 8.34E-01 | 1.00E+00 | -0.11 | 7.72E-01 | 9.70E-01 |
| <b>NOC2L</b>      | -0.27 | 3.11E-01 | 1.00E+00 | 0.08  | 7.72E-01 | 9.70E-01 |
| <b>AC138207.3</b> | -0.06 | 9.54E-01 | 1.00E+00 | -0.20 | 7.72E-01 | 9.70E-01 |
| <b>ADGRF5</b>     | 0.55  | 2.91E-01 | 1.00E+00 | 0.17  | 7.72E-01 | 9.70E-01 |
| <b>G33852</b>     | 0.40  | 5.51E-01 | 1.00E+00 | 0.21  | 7.72E-01 | 9.70E-01 |
| <b>GALNT14</b>    | -0.60 | 1.46E-01 | 1.00E+00 | 0.18  | 7.72E-01 | 9.70E-01 |
| <b>FZD5</b>       | 0.05  | 9.23E-01 | 1.00E+00 | 0.17  | 7.72E-01 | 9.70E-01 |
| <b>NOTCH3</b>     | -0.12 | 5.99E-01 | 1.00E+00 | 0.18  | 7.72E-01 | 9.70E-01 |
| <b>SPAG6</b>      | 0.73  | 5.57E-01 | 1.00E+00 | -0.23 | 7.72E-01 | 9.70E-01 |
| <b>AL161787.1</b> | -0.54 | 8.75E-01 | 1.00E+00 | -0.22 | 7.72E-01 | 9.70E-01 |
| <b>DNAJC4</b>     | -0.11 | 6.97E-01 | 1.00E+00 | 0.06  | 7.72E-01 | 9.70E-01 |
| <b>KRT2</b>       | 0.18  | 7.96E-01 | 1.00E+00 | 0.90  | 7.72E-01 | 9.70E-01 |
| <b>YPEL2</b>      | 0.50  | 2.82E-02 | 9.75E-01 | 0.07  | 7.72E-01 | 9.70E-01 |
| <b>SGO1</b>       | -0.83 | 1.90E-01 | 1.00E+00 | -0.18 | 7.72E-01 | 9.70E-01 |
| <b>AF186192.2</b> | 0.48  | 4.00E-01 | 1.00E+00 | 0.21  | 7.72E-01 | 9.70E-01 |
| <b>XRCC5</b>      | -0.10 | 5.83E-01 | 1.00E+00 | -0.04 | 7.73E-01 | 9.70E-01 |
| <b>PPRC1</b>      | -0.47 | 1.14E-01 | 1.00E+00 | -0.13 | 7.73E-01 | 9.70E-01 |
| <b>AC142472.1</b> | 0.13  | 8.41E-01 | 1.00E+00 | -0.15 | 7.73E-01 | 9.70E-01 |
| <b>PRR13P5</b>    | -0.12 | 8.52E-01 | 1.00E+00 | -0.13 | 7.73E-01 | 9.70E-01 |
| <b>C6orf15</b>    | -0.86 | 1.93E-01 | 1.00E+00 | 0.18  | 7.73E-01 | 9.70E-01 |
| <b>AL590867.2</b> | 0.02  | 9.57E-01 | 1.00E+00 | 0.23  | 7.73E-01 | 9.70E-01 |
| <b>FXVD3</b>      | -0.04 | 9.50E-01 | 1.00E+00 | 0.15  | 7.73E-01 | 9.70E-01 |
| <b>AC007780.1</b> | -0.86 | 7.04E-01 | 1.00E+00 | 0.25  | 7.73E-01 | 9.70E-01 |
| <b>ARFGEF1</b>    | 0.27  | 2.58E-01 | 1.00E+00 | 0.12  | 7.73E-01 | 9.70E-01 |
| <b>FHOD3</b>      | -0.19 | 6.82E-01 | 1.00E+00 | 0.14  | 7.73E-01 | 9.70E-01 |
| <b>ZNF74</b>      | -0.17 | 5.27E-01 | 1.00E+00 | -0.15 | 7.73E-01 | 9.70E-01 |
| <b>CLK2</b>       | -0.08 | 7.27E-01 | 1.00E+00 | -0.16 | 7.73E-01 | 9.70E-01 |
| <b>HNRNPCP7</b>   | 1.10  | 1.79E-01 | 1.00E+00 | -0.27 | 7.73E-01 | 9.70E-01 |
| <b>AC139713.2</b> | -0.85 | 4.29E-01 | 1.00E+00 | -0.18 | 7.73E-01 | 9.70E-01 |

|            |       |          |          |       |          |          |
|------------|-------|----------|----------|-------|----------|----------|
| ZNF790     | 0.13  | 6.80E-01 | 1.00E+00 | -0.09 | 7.73E-01 | 9.70E-01 |
| CEBPB      | -0.17 | 6.27E-01 | 1.00E+00 | 0.24  | 7.73E-01 | 9.70E-01 |
| DDHD1      | -0.04 | 8.90E-01 | 1.00E+00 | 0.09  | 7.73E-01 | 9.70E-01 |
| RALGAPB    | 0.24  | 2.29E-01 | 1.00E+00 | 0.10  | 7.73E-01 | 9.70E-01 |
| PDZD2      | 0.18  | 5.01E-01 | 1.00E+00 | -0.07 | 7.73E-01 | 9.70E-01 |
| ANKFN1     | -0.06 | 8.88E-01 | 1.00E+00 | -0.20 | 7.73E-01 | 9.70E-01 |
| SUGP2      | -0.25 | 3.25E-01 | 1.00E+00 | 0.15  | 7.73E-01 | 9.70E-01 |
| GCNA       | -1.71 | 3.48E-01 | 1.00E+00 | 0.41  | 7.73E-01 | 9.70E-01 |
| LIFR-AS1   | -0.09 | 8.31E-01 | 1.00E+00 | -0.12 | 7.73E-01 | 9.70E-01 |
| CYP2J2     | -0.14 | 7.69E-01 | 1.00E+00 | -0.20 | 7.73E-01 | 9.70E-01 |
| AC009283.1 | -0.59 | 5.11E-01 | 1.00E+00 | -0.32 | 7.74E-01 | 9.70E-01 |
| AC064801.1 | -2.76 | 1.22E-01 | 1.00E+00 | 0.25  | 7.74E-01 | 9.70E-01 |
| PLEKHA8    | 0.43  | 2.35E-01 | 1.00E+00 | -0.15 | 7.74E-01 | 9.70E-01 |
| AC098614.1 | 0.61  | 2.50E-01 | 1.00E+00 | -0.10 | 7.74E-01 | 9.70E-01 |
| HSPA8      | -0.35 | 1.37E-01 | 1.00E+00 | 0.10  | 7.74E-01 | 9.70E-01 |
| ADCYAP1R1  | 0.53  | 3.72E-01 | 1.00E+00 | 0.22  | 7.74E-01 | 9.70E-01 |
| LMOD1      | 0.00  | 9.94E-01 | 1.00E+00 | -0.15 | 7.74E-01 | 9.70E-01 |
| AC093311.1 | -2.01 | 3.08E-01 | 1.00E+00 | -0.92 | 7.74E-01 | 9.70E-01 |
| FAM220A    | -0.03 | 8.95E-01 | 1.00E+00 | 0.07  | 7.74E-01 | 9.70E-01 |
| RPS27A     | -0.08 | 7.92E-01 | 1.00E+00 | -0.07 | 7.74E-01 | 9.71E-01 |
| RARG       | -0.08 | 8.19E-01 | 1.00E+00 | -0.12 | 7.74E-01 | 9.71E-01 |
| HMG20B     | -0.34 | 7.59E-02 | 1.00E+00 | -0.08 | 7.74E-01 | 9.71E-01 |
| BRD3       | -0.18 | 4.13E-01 | 1.00E+00 | 0.06  | 7.74E-01 | 9.71E-01 |
| PRKCI      | 0.23  | 4.40E-01 | 1.00E+00 | -0.09 | 7.74E-01 | 9.71E-01 |
| APOB       | 1.58  | 5.47E-02 | 1.00E+00 | -0.21 | 7.74E-01 | 9.71E-01 |
| WDCP       | -0.01 | 9.67E-01 | 1.00E+00 | -0.16 | 7.74E-01 | 9.71E-01 |
| MLPH       | 0.02  | 9.77E-01 | 1.00E+00 | 0.10  | 7.74E-01 | 9.71E-01 |
| RFX4       | -1.82 | 5.12E-01 | 1.00E+00 | 0.57  | 7.74E-01 | 9.71E-01 |
| NTRK1      | 0.10  | 9.38E-01 | 1.00E+00 | 0.91  | 7.74E-01 | 9.71E-01 |
| LINC01128  | 0.02  | 9.45E-01 | 1.00E+00 | -0.09 | 7.74E-01 | 9.71E-01 |
| G10252     | -0.86 | 2.52E-01 | 1.00E+00 | -0.20 | 7.74E-01 | 9.71E-01 |
| TENM1      | -0.69 | 2.52E-01 | 1.00E+00 | -0.16 | 7.75E-01 | 9.71E-01 |



|             |       |          |          |       |          |          |
|-------------|-------|----------|----------|-------|----------|----------|
| FRS3        | -0.38 | 2.22E-01 | 1.00E+00 | 0.24  | 7.75E-01 | 9.71E-01 |
| RPL12P38    | 1.78  | 2.78E-01 | 1.00E+00 | -0.14 | 7.75E-01 | 9.71E-01 |
| DMWD        | -0.44 | 1.34E-01 | 1.00E+00 | 0.17  | 7.75E-01 | 9.71E-01 |
| ABCC8       | -3.90 | 2.69E-03 | 2.68E-01 | -0.37 | 7.75E-01 | 9.71E-01 |
| MTFR1       | -0.04 | 8.66E-01 | 1.00E+00 | 0.05  | 7.75E-01 | 9.71E-01 |
| CPT2        | -0.12 | 6.57E-01 | 1.00E+00 | 0.07  | 7.75E-01 | 9.71E-01 |
| SMC2-AS1    | 0.24  | 8.93E-01 | 1.00E+00 | 0.44  | 7.75E-01 | 9.71E-01 |
| TAF10       | 0.00  | 9.90E-01 | 1.00E+00 | -0.22 | 7.75E-01 | 9.71E-01 |
| RPS2P5      | -0.67 | 5.21E-02 | 1.00E+00 | -0.20 | 7.75E-01 | 9.71E-01 |
| HEATR3      | 0.01  | 9.81E-01 | 1.00E+00 | 0.16  | 7.75E-01 | 9.71E-01 |
| AL359182.2  | -0.57 | 7.05E-01 | 1.00E+00 | 0.34  | 7.75E-01 | 9.71E-01 |
| SLC44A2     | 0.07  | 6.91E-01 | 1.00E+00 | -0.09 | 7.75E-01 | 9.71E-01 |
| AL603839.2  | 0.41  | 6.90E-01 | 1.00E+00 | 0.27  | 7.75E-01 | 9.71E-01 |
| RN7SL382P   | -2.57 | 4.51E-01 | 1.00E+00 | 0.36  | 7.75E-01 | 9.71E-01 |
| AC092611.2  | 0.48  | 2.14E-01 | 1.00E+00 | 0.19  | 7.75E-01 | 9.71E-01 |
| LINC02028   | 2.62  | 2.18E-02 | 8.95E-01 | 0.24  | 7.75E-01 | 9.71E-01 |
| GCLC        | -0.24 | 3.37E-01 | 1.00E+00 | -0.09 | 7.75E-01 | 9.71E-01 |
| EEF1B2P1    | -1.19 | 7.32E-01 | 1.00E+00 | -0.23 | 7.75E-01 | 9.71E-01 |
| EEF1B2P2    | -0.80 | 8.18E-01 | 1.00E+00 | 0.19  | 7.75E-01 | 9.71E-01 |
| DDX23       | -0.06 | 6.98E-01 | 1.00E+00 | 0.10  | 7.75E-01 | 9.71E-01 |
| NEPRO       | 0.06  | 7.47E-01 | 1.00E+00 | 0.05  | 7.75E-01 | 9.71E-01 |
| PHIP        | 0.11  | 5.73E-01 | 1.00E+00 | -0.05 | 7.75E-01 | 9.71E-01 |
| G10667      | 0.48  | 7.73E-01 | 1.00E+00 | 0.42  | 7.75E-01 | 9.71E-01 |
| AC092835.1  | 0.85  | 1.53E-01 | 1.00E+00 | 0.25  | 7.75E-01 | 9.71E-01 |
| AC092279.1  | 0.00  | 9.95E-01 | 1.00E+00 | -0.22 | 7.75E-01 | 9.71E-01 |
| BRWD3       | 0.34  | 4.53E-01 | 1.00E+00 | -0.12 | 7.75E-01 | 9.71E-01 |
| ANXA13      | -0.20 | 8.58E-01 | 1.00E+00 | 0.33  | 7.75E-01 | 9.71E-01 |
| POLR3B      | 0.02  | 9.55E-01 | 1.00E+00 | -0.06 | 7.76E-01 | 9.71E-01 |
| LINC01703   | -0.44 | 2.94E-01 | 1.00E+00 | -0.16 | 7.76E-01 | 9.71E-01 |
| DISP2       | -2.66 | 1.55E-03 | 2.18E-01 | -0.29 | 7.76E-01 | 9.71E-01 |
| XLOC_010305 | 2.05  | 1.36E-01 | 1.00E+00 | 0.31  | 7.76E-01 | 9.71E-01 |
| SPTLC3      | 0.26  | 6.11E-01 | 1.00E+00 | 0.10  | 7.76E-01 | 9.71E-01 |

|                    |       |          |          |       |          |          |
|--------------------|-------|----------|----------|-------|----------|----------|
| <b>RTEL1</b>       | 1.08  | 4.48E-01 | 1.00E+00 | -0.22 | 7.76E-01 | 9.71E-01 |
| <b>RPS19BP1</b>    | 0.13  | 5.04E-01 | 1.00E+00 | -0.05 | 7.76E-01 | 9.71E-01 |
| <b>POU5F1</b>      | -0.32 | 4.77E-01 | 1.00E+00 | -0.22 | 7.76E-01 | 9.71E-01 |
| <b>GUCY1B1</b>     | 0.17  | 7.28E-01 | 1.00E+00 | -0.10 | 7.76E-01 | 9.71E-01 |
| <b>MLX</b>         | 0.03  | 8.73E-01 | 1.00E+00 | 0.05  | 7.76E-01 | 9.71E-01 |
| <b>AL031665.2</b>  | -2.68 | 5.46E-02 | 1.00E+00 | 0.16  | 7.76E-01 | 9.71E-01 |
| <b>LDLR</b>        | -0.85 | 3.32E-02 | 1.00E+00 | 0.13  | 7.76E-01 | 9.71E-01 |
| <b>EMCN</b>        | 0.31  | 5.17E-01 | 1.00E+00 | -0.15 | 7.76E-01 | 9.71E-01 |
| <b>MRFAP1L1</b>    | 0.19  | 2.31E-01 | 1.00E+00 | -0.03 | 7.76E-01 | 9.71E-01 |
| <b>MXRA5Y</b>      | 0.16  | 9.07E-01 | 1.00E+00 | -0.21 | 7.76E-01 | 9.71E-01 |
| <b>IL21R</b>       | -0.18 | 8.22E-01 | 1.00E+00 | 0.89  | 7.76E-01 | 9.71E-01 |
| <b>C4B</b>         | 0.22  | 8.08E-01 | 1.00E+00 | 0.89  | 7.76E-01 | 9.71E-01 |
| <b>POLR2H</b>      | 0.04  | 8.50E-01 | 1.00E+00 | 0.06  | 7.77E-01 | 9.71E-01 |
| <b>AL023284.4</b>  | 0.36  | 4.73E-01 | 1.00E+00 | -0.15 | 7.77E-01 | 9.71E-01 |
| <b>SNORA25</b>     | -1.65 | 4.96E-01 | 1.00E+00 | -0.31 | 7.77E-01 | 9.71E-01 |
| <b>ST8SIA6</b>     | -0.96 | 4.93E-02 | 1.00E+00 | 0.20  | 7.77E-01 | 9.71E-01 |
| <b>NR1I3</b>       | 0.22  | 6.57E-01 | 1.00E+00 | 0.22  | 7.77E-01 | 9.71E-01 |
| <b>MUM1</b>        | -0.05 | 8.13E-01 | 1.00E+00 | -0.09 | 7.77E-01 | 9.71E-01 |
| <b>AC084782.3</b>  | -3.19 | 2.31E-01 | 1.00E+00 | -0.29 | 7.77E-01 | 9.71E-01 |
| <b>CC2D1A</b>      | -0.28 | 2.43E-01 | 1.00E+00 | -0.15 | 7.77E-01 | 9.71E-01 |
| <b>DUSP7</b>       | -0.27 | 4.59E-01 | 1.00E+00 | 0.12  | 7.77E-01 | 9.71E-01 |
| <b>FAM3C2</b>      | -0.02 | 9.57E-01 | 1.00E+00 | -0.16 | 7.77E-01 | 9.71E-01 |
| <b>ZNF814</b>      | -0.64 | 1.40E-01 | 1.00E+00 | -0.11 | 7.77E-01 | 9.71E-01 |
| <b>PKN3</b>        | 0.11  | 7.93E-01 | 1.00E+00 | 0.19  | 7.77E-01 | 9.71E-01 |
| <b>XLOC_004478</b> | 0.58  | 6.27E-01 | 1.00E+00 | -0.33 | 7.77E-01 | 9.71E-01 |
| <b>HHAT</b>        | -0.23 | 5.36E-01 | 1.00E+00 | 0.08  | 7.77E-01 | 9.71E-01 |
| <b>HOXC4</b>       | -0.39 | 2.33E-01 | 1.00E+00 | -0.14 | 7.77E-01 | 9.71E-01 |
| <b>DBN1</b>        | -0.03 | 9.62E-01 | 1.00E+00 | 0.16  | 7.77E-01 | 9.71E-01 |
| <b>AP002990.1</b>  | -0.69 | 4.53E-02 | 1.00E+00 | 0.09  | 7.77E-01 | 9.71E-01 |
| <b>GSTCD</b>       | 0.31  | 2.36E-01 | 1.00E+00 | 0.07  | 7.77E-01 | 9.71E-01 |
| <b>AC009090.3</b>  | -1.82 | 4.97E-01 | 1.00E+00 | 0.25  | 7.77E-01 | 9.71E-01 |
| <b>ABHD15</b>      | 0.36  | 3.35E-01 | 1.00E+00 | -0.15 | 7.77E-01 | 9.71E-01 |

|             |       |          |          |       |          |          |
|-------------|-------|----------|----------|-------|----------|----------|
| LCE2C       | 0.92  | 1.97E-01 | 1.00E+00 | 0.22  | 7.77E-01 | 9.71E-01 |
| ANKRD24     | -1.04 | 6.92E-02 | 1.00E+00 | 0.33  | 7.77E-01 | 9.71E-01 |
| GFRA2       | -0.20 | 6.36E-01 | 1.00E+00 | 0.16  | 7.77E-01 | 9.71E-01 |
| STK24-AS1   | -0.20 | 8.21E-01 | 1.00E+00 | 0.33  | 7.77E-01 | 9.71E-01 |
| XLOC_008811 | 7.46  | 7.73E-03 | 5.39E-01 | -0.25 | 7.77E-01 | 9.71E-01 |
| BEST2       | 1.10  | 3.59E-02 | 1.00E+00 | -0.26 | 7.77E-01 | 9.71E-01 |
| CCDC77      | 0.26  | 3.22E-01 | 1.00E+00 | -0.14 | 7.77E-01 | 9.71E-01 |
| SAMD8       | 0.10  | 6.76E-01 | 1.00E+00 | -0.08 | 7.77E-01 | 9.71E-01 |
| KCNN2       | -2.49 | 5.98E-03 | 4.59E-01 | 0.15  | 7.77E-01 | 9.71E-01 |
| CDC42EP3    | 0.00  | 9.92E-01 | 1.00E+00 | -0.11 | 7.77E-01 | 9.71E-01 |
| PHRF1       | -0.31 | 2.26E-01 | 1.00E+00 | 0.22  | 7.77E-01 | 9.71E-01 |
| RNF169      | -0.20 | 4.65E-01 | 1.00E+00 | 0.16  | 7.78E-01 | 9.71E-01 |
| LCA5        | 0.30  | 4.81E-01 | 1.00E+00 | -0.11 | 7.78E-01 | 9.71E-01 |
| KRTAP8-1    | -1.59 | 6.38E-01 | 1.00E+00 | -0.91 | 7.78E-01 | 9.71E-01 |
| PAMR1       | 0.15  | 7.12E-01 | 1.00E+00 | -0.10 | 7.78E-01 | 9.71E-01 |
| AL161636.1  | 0.20  | 9.01E-01 | 1.00E+00 | 0.37  | 7.78E-01 | 9.71E-01 |
| SPARCL1     | 0.18  | 7.04E-01 | 1.00E+00 | 0.14  | 7.78E-01 | 9.71E-01 |
| RPRD1A      | 0.16  | 4.74E-01 | 1.00E+00 | -0.05 | 7.78E-01 | 9.71E-01 |
| NGFR        | -0.32 | 4.38E-01 | 1.00E+00 | 0.19  | 7.78E-01 | 9.71E-01 |
| HIRA        | -0.21 | 5.41E-01 | 1.00E+00 | 0.14  | 7.78E-01 | 9.71E-01 |
| AL136309.2  | 1.05  | 3.99E-01 | 1.00E+00 | 0.45  | 7.78E-01 | 9.71E-01 |
| AL355304.1  | 0.37  | 9.14E-01 | 1.00E+00 | -0.28 | 7.78E-01 | 9.71E-01 |
| PHF24       | -1.08 | 4.15E-02 | 1.00E+00 | -0.21 | 7.78E-01 | 9.71E-01 |
| RPS27P29    | -1.60 | 6.41E-01 | 1.00E+00 | 0.28  | 7.78E-01 | 9.71E-01 |
| G18874      | 1.50  | 1.24E-01 | 1.00E+00 | -0.22 | 7.78E-01 | 9.71E-01 |
| G28331      | 0.35  | 7.04E-01 | 1.00E+00 | -0.17 | 7.78E-01 | 9.71E-01 |
| NAA80       | -0.26 | 3.60E-01 | 1.00E+00 | -0.07 | 7.78E-01 | 9.71E-01 |
| FAU         | -0.10 | 6.86E-01 | 1.00E+00 | 0.07  | 7.78E-01 | 9.71E-01 |
| HCN1        | -2.00 | 1.60E-02 | 7.92E-01 | -0.34 | 7.78E-01 | 9.71E-01 |
| NT5DC2      | -0.17 | 6.52E-01 | 1.00E+00 | 0.09  | 7.78E-01 | 9.71E-01 |
| CISH        | -0.89 | 4.05E-03 | 3.54E-01 | -0.13 | 7.78E-01 | 9.71E-01 |
| FAM84B      | 0.18  | 6.25E-01 | 1.00E+00 | -0.09 | 7.78E-01 | 9.71E-01 |

|                   |       |          |          |       |          |          |
|-------------------|-------|----------|----------|-------|----------|----------|
| <b>SERPINF2</b>   | -0.41 | 2.09E-01 | 1.00E+00 | 0.12  | 7.79E-01 | 9.71E-01 |
| <b>RPS4XP16</b>   | -0.63 | 5.31E-01 | 1.00E+00 | -0.23 | 7.79E-01 | 9.71E-01 |
| <b>RN7SL751P</b>  | -1.97 | 5.67E-01 | 1.00E+00 | -0.30 | 7.79E-01 | 9.71E-01 |
| <b>RABGAP1</b>    | 0.32  | 3.32E-02 | 1.00E+00 | -0.12 | 7.79E-01 | 9.71E-01 |
| <b>SPC24</b>      | -0.34 | 4.38E-01 | 1.00E+00 | 0.12  | 7.79E-01 | 9.71E-01 |
| <b>NUSAP1</b>     | -2.27 | 3.94E-02 | 1.00E+00 | 0.19  | 7.79E-01 | 9.71E-01 |
| <b>SENP3</b>      | -0.02 | 9.54E-01 | 1.00E+00 | 0.23  | 7.79E-01 | 9.71E-01 |
| <b>G24400</b>     | -0.48 | 6.19E-01 | 1.00E+00 | 0.21  | 7.79E-01 | 9.71E-01 |
| <b>KRT39</b>      | -4.67 | 4.75E-02 | 1.00E+00 | 0.88  | 7.79E-01 | 9.71E-01 |
| <b>GALNT3</b>     | 0.23  | 5.38E-01 | 1.00E+00 | 0.11  | 7.79E-01 | 9.71E-01 |
| <b>ADD2</b>       | -1.09 | 4.24E-02 | 1.00E+00 | -0.19 | 7.79E-01 | 9.71E-01 |
| <b>CYB561A3</b>   | -0.12 | 6.40E-01 | 1.00E+00 | 0.07  | 7.79E-01 | 9.71E-01 |
| <b>ZNF704</b>     | 0.20  | 5.39E-01 | 1.00E+00 | 0.11  | 7.79E-01 | 9.71E-01 |
| <b>BMX</b>        | 0.29  | 6.65E-01 | 1.00E+00 | -0.17 | 7.79E-01 | 9.71E-01 |
| <b>KRTAP19-5</b>  | -1.75 | 5.98E-01 | 1.00E+00 | -0.90 | 7.79E-01 | 9.71E-01 |
| <b>PDXK</b>       | 0.75  | 1.19E-01 | 1.00E+00 | -0.15 | 7.80E-01 | 9.71E-01 |
| <b>ATP5BP5</b>    | -0.06 | 9.23E-01 | 1.00E+00 | 0.35  | 7.80E-01 | 9.71E-01 |
| <b>SLC6A2</b>     | 0.53  | 3.40E-01 | 1.00E+00 | 0.13  | 7.80E-01 | 9.71E-01 |
| <b>SPAAR</b>      | 1.85  | 1.77E-02 | 8.36E-01 | 0.63  | 7.80E-01 | 9.71E-01 |
| <b>NCAPH</b>      | 0.03  | 9.49E-01 | 1.00E+00 | 0.18  | 7.80E-01 | 9.71E-01 |
| <b>CYP4F22</b>    | -0.05 | 9.23E-01 | 1.00E+00 | 0.16  | 7.80E-01 | 9.71E-01 |
| <b>AC009779.2</b> | -0.32 | 5.21E-01 | 1.00E+00 | 0.18  | 7.80E-01 | 9.71E-01 |
| <b>PSMD7</b>      | -0.04 | 8.62E-01 | 1.00E+00 | -0.08 | 7.80E-01 | 9.71E-01 |
| <b>ANP32E</b>     | 0.07  | 7.66E-01 | 1.00E+00 | -0.09 | 7.80E-01 | 9.71E-01 |
| <b>C3orf33</b>    | -1.44 | 1.99E-01 | 1.00E+00 | -0.17 | 7.80E-01 | 9.71E-01 |
| <b>ANXA8L2</b>    | -0.59 | 1.72E-01 | 1.00E+00 | 0.16  | 7.80E-01 | 9.71E-01 |
| <b>SMYD5</b>      | -0.26 | 3.62E-01 | 1.00E+00 | 0.07  | 7.80E-01 | 9.71E-01 |
| <b>UBXN4</b>      | 0.00  | 9.95E-01 | 1.00E+00 | -0.04 | 7.80E-01 | 9.71E-01 |
| <b>CHMP6</b>      | -0.35 | 2.26E-01 | 1.00E+00 | 0.05  | 7.80E-01 | 9.71E-01 |
| <b>UBOX5</b>      | -0.31 | 2.20E-01 | 1.00E+00 | -0.07 | 7.80E-01 | 9.71E-01 |
| <b>IL34</b>       | 0.10  | 8.10E-01 | 1.00E+00 | 0.12  | 7.80E-01 | 9.71E-01 |
| <b>AC114947.2</b> | -0.14 | 8.90E-01 | 1.00E+00 | -0.23 | 7.80E-01 | 9.71E-01 |

|                    |       |          |          |       |          |          |
|--------------------|-------|----------|----------|-------|----------|----------|
| <b>XLOC_013697</b> | 0.84  | 1.56E-01 | 1.00E+00 | -0.27 | 7.80E-01 | 9.71E-01 |
| <b>SLC4A4</b>      | -0.19 | 8.26E-01 | 1.00E+00 | -0.25 | 7.80E-01 | 9.71E-01 |
| <b>AC022973.4</b>  | -0.42 | 8.31E-01 | 1.00E+00 | 0.36  | 7.80E-01 | 9.71E-01 |
| <b>AL590139.1</b>  | -0.20 | 8.73E-01 | 1.00E+00 | -0.17 | 7.80E-01 | 9.71E-01 |
| <b>AJ011932.1</b>  | 0.80  | 4.74E-01 | 1.00E+00 | 0.23  | 7.80E-01 | 9.71E-01 |
| <b>G26757</b>      | -0.13 | 8.90E-01 | 1.00E+00 | -0.20 | 7.81E-01 | 9.71E-01 |
| <b>AC022558.1</b>  | 1.33  | 6.09E-01 | 1.00E+00 | -0.35 | 7.81E-01 | 9.71E-01 |
| <b>XLOC_001934</b> | -1.02 | 6.57E-01 | 1.00E+00 | 0.31  | 7.81E-01 | 9.71E-01 |
| <b>AL662844.4</b>  | 0.53  | 3.70E-01 | 1.00E+00 | -0.10 | 7.81E-01 | 9.71E-01 |
| <b>NFE2L3</b>      | -0.05 | 9.14E-01 | 1.00E+00 | 0.15  | 7.81E-01 | 9.71E-01 |
| <b>ACADVL</b>      | 0.35  | 1.09E-01 | 1.00E+00 | -0.09 | 7.81E-01 | 9.71E-01 |
| <b>CYP4F2</b>      | 0.03  | 9.86E-01 | 1.00E+00 | -0.88 | 7.81E-01 | 9.71E-01 |
| <b>ETHE1</b>       | -0.26 | 4.71E-01 | 1.00E+00 | -0.06 | 7.81E-01 | 9.71E-01 |
| <b>CCDC178</b>     | -0.97 | 4.62E-01 | 1.00E+00 | -0.66 | 7.81E-01 | 9.71E-01 |
| <b>ACLY</b>        | -0.06 | 8.44E-01 | 1.00E+00 | -0.11 | 7.81E-01 | 9.71E-01 |
| <b>ADSS</b>        | 0.03  | 8.87E-01 | 1.00E+00 | -0.05 | 7.81E-01 | 9.71E-01 |
| <b>PRORS1P</b>     | -0.32 | 6.33E-01 | 1.00E+00 | -0.21 | 7.81E-01 | 9.71E-01 |
| <b>UBAC2</b>       | 0.36  | 4.14E-02 | 1.00E+00 | 0.03  | 7.81E-01 | 9.71E-01 |
| <b>IGKJ3</b>       | -0.48 | 8.90E-01 | 1.00E+00 | 0.74  | 7.81E-01 | 9.71E-01 |
| <b>RUSC1-AS1</b>   | -0.92 | 3.38E-01 | 1.00E+00 | 0.22  | 7.81E-01 | 9.71E-01 |
| <b>XLOC_008141</b> | 0.23  | 8.77E-01 | 1.00E+00 | 0.39  | 7.81E-01 | 9.71E-01 |
| <b>CBR3</b>        | -0.51 | 2.99E-01 | 1.00E+00 | -0.15 | 7.81E-01 | 9.71E-01 |
| <b>CERS2</b>       | 0.02  | 9.56E-01 | 1.00E+00 | 0.08  | 7.81E-01 | 9.71E-01 |
| <b>SYT14</b>       | -4.92 | 1.09E-03 | 1.72E-01 | 0.28  | 7.81E-01 | 9.71E-01 |
| <b>WDR33</b>       | -0.33 | 1.87E-01 | 1.00E+00 | -0.05 | 7.81E-01 | 9.71E-01 |
| <b>KNL1</b>        | -0.56 | 1.47E-01 | 1.00E+00 | -0.18 | 7.82E-01 | 9.71E-01 |
| <b>ZNF321P</b>     | -0.99 | 1.79E-01 | 1.00E+00 | 0.15  | 7.82E-01 | 9.71E-01 |
| <b>ITPR3</b>       | -0.15 | 7.31E-01 | 1.00E+00 | -0.16 | 7.82E-01 | 9.71E-01 |
| <b>LARGE2</b>      | -0.50 | 3.11E-02 | 1.00E+00 | -0.17 | 7.82E-01 | 9.71E-01 |
| <b>G5265</b>       | -2.18 | 5.60E-02 | 1.00E+00 | -0.33 | 7.82E-01 | 9.71E-01 |
| <b>ERLEC1</b>      | 0.16  | 4.09E-01 | 1.00E+00 | 0.05  | 7.82E-01 | 9.71E-01 |
| <b>AC092868.2</b>  | 0.32  | 9.26E-01 | 1.00E+00 | -0.32 | 7.82E-01 | 9.71E-01 |

|             |        |          |          |       |          |          |
|-------------|--------|----------|----------|-------|----------|----------|
| Z99289.1    | 1.54   | 5.30E-01 | 1.00E+00 | -0.37 | 7.82E-01 | 9.71E-01 |
| CDK2AP2     | -0.40  | 1.93E-01 | 1.00E+00 | -0.07 | 7.82E-01 | 9.71E-01 |
| ARNTL       | 1.01   | 8.16E-03 | 5.56E-01 | 0.09  | 7.82E-01 | 9.71E-01 |
| RPS7P1      | -0.46  | 2.32E-01 | 1.00E+00 | -0.15 | 7.82E-01 | 9.71E-01 |
| PSPC1P1     | -2.11  | 3.56E-01 | 1.00E+00 | -0.22 | 7.82E-01 | 9.71E-01 |
| AP003119.1  | -1.28  | 7.10E-01 | 1.00E+00 | 0.28  | 7.82E-01 | 9.71E-01 |
| MAATS1      | 0.06   | 9.55E-01 | 1.00E+00 | 0.22  | 7.82E-01 | 9.71E-01 |
| C9orf78     | 0.09   | 6.37E-01 | 1.00E+00 | -0.06 | 7.82E-01 | 9.71E-01 |
| SENP7       | 0.33   | 3.35E-01 | 1.00E+00 | -0.06 | 7.82E-01 | 9.72E-01 |
| C11orf68    | 0.01   | 9.69E-01 | 1.00E+00 | 0.15  | 7.82E-01 | 9.72E-01 |
| FAM83C      | -0.32  | 5.53E-01 | 1.00E+00 | -0.19 | 7.82E-01 | 9.72E-01 |
| GATA3-AS1   | -0.94  | 3.10E-01 | 1.00E+00 | 0.25  | 7.82E-01 | 9.72E-01 |
| AC007881.3  | 1.92   | 4.92E-01 | 1.00E+00 | -0.85 | 7.82E-01 | 9.72E-01 |
| NUDCD3      | 0.02   | 8.55E-01 | 1.00E+00 | 0.06  | 7.82E-01 | 9.72E-01 |
| CMYA5       | -0.22  | 6.10E-01 | 1.00E+00 | -0.14 | 7.82E-01 | 9.72E-01 |
| XLOC_013022 | 4.66   | 3.87E-03 | 3.41E-01 | 0.87  | 7.82E-01 | 9.72E-01 |
| AL022322.1  | -1.32  | 4.51E-01 | 1.00E+00 | 0.72  | 7.82E-01 | 9.72E-01 |
| SYPL2       | 1.61   | 6.41E-02 | 1.00E+00 | 0.23  | 7.82E-01 | 9.72E-01 |
| SMKR1       | 0.15   | 8.01E-01 | 1.00E+00 | -0.23 | 7.82E-01 | 9.72E-01 |
| EXOC1       | 0.05   | 8.29E-01 | 1.00E+00 | -0.05 | 7.82E-01 | 9.72E-01 |
| NUP93       | -0.33  | 4.98E-02 | 1.00E+00 | -0.04 | 7.82E-01 | 9.72E-01 |
| GPR84       | -1.63  | 2.05E-01 | 1.00E+00 | 0.87  | 7.82E-01 | 9.72E-01 |
| XLOC_008114 | -1.27  | 5.47E-01 | 1.00E+00 | 0.34  | 7.82E-01 | 9.72E-01 |
| AC022150.2  | 0.80   | 1.33E-01 | 1.00E+00 | 0.29  | 7.83E-01 | 9.72E-01 |
| GPAA1       | 0.01   | 9.82E-01 | 1.00E+00 | 0.06  | 7.83E-01 | 9.72E-01 |
| AGPAT1      | 0.22   | 4.87E-01 | 1.00E+00 | 0.09  | 7.83E-01 | 9.72E-01 |
| AC006213.4  | -0.10  | 9.16E-01 | 1.00E+00 | -0.30 | 7.83E-01 | 9.72E-01 |
| AL445250.1  | -0.56  | 8.26E-01 | 1.00E+00 | -0.27 | 7.83E-01 | 9.72E-01 |
| C18orf32    | 0.42   | 3.26E-01 | 1.00E+00 | 0.14  | 7.83E-01 | 9.72E-01 |
| HSPB2       | -1.32  | 6.38E-01 | 1.00E+00 | 0.19  | 7.83E-01 | 9.72E-01 |
| CHRNA3      | -2.74  | 4.43E-02 | 1.00E+00 | 0.30  | 7.83E-01 | 9.72E-01 |
| KRTAP10-11  | -13.54 | 7.77E-05 | 2.01E-02 | -0.88 | 7.83E-01 | 9.72E-01 |

|                   |        |          |          |       |          |          |
|-------------------|--------|----------|----------|-------|----------|----------|
| <b>ELOVL2</b>     | 0.14   | 7.84E-01 | 1.00E+00 | -0.26 | 7.83E-01 | 9.72E-01 |
| <b>G36295</b>     | -3.38  | 5.17E-02 | 1.00E+00 | 0.27  | 7.83E-01 | 9.72E-01 |
| <b>INPP5E</b>     | -0.21  | 3.60E-01 | 1.00E+00 | 0.17  | 7.83E-01 | 9.72E-01 |
| <b>AC111152.3</b> | 1.16   | 7.39E-01 | 1.00E+00 | 0.26  | 7.83E-01 | 9.72E-01 |
| <b>DBH-AS1</b>    | -2.86  | 6.74E-02 | 1.00E+00 | 0.49  | 7.83E-01 | 9.72E-01 |
| <b>GLIS2-AS1</b>  | -2.27  | 1.09E-01 | 1.00E+00 | -0.19 | 7.83E-01 | 9.72E-01 |
| <b>HPDL</b>       | -0.08  | 8.72E-01 | 1.00E+00 | 0.19  | 7.83E-01 | 9.72E-01 |
| <b>RASAL2-AS1</b> | -0.72  | 2.39E-01 | 1.00E+00 | -0.21 | 7.83E-01 | 9.72E-01 |
| <b>HMSD</b>       | 0.69   | 4.01E-01 | 1.00E+00 | -0.18 | 7.83E-01 | 9.72E-01 |
| <b>AHR</b>        | -0.08  | 7.36E-01 | 1.00E+00 | 0.09  | 7.83E-01 | 9.72E-01 |
| <b>TMEM109</b>    | 0.10   | 6.03E-01 | 1.00E+00 | 0.05  | 7.83E-01 | 9.72E-01 |
| <b>GTF2H3</b>     | 0.10   | 6.36E-01 | 1.00E+00 | -0.04 | 7.83E-01 | 9.72E-01 |
| <b>RNPC3</b>      | 0.11   | 6.79E-01 | 1.00E+00 | -0.08 | 7.84E-01 | 9.72E-01 |
| <b>PXK</b>        | 0.17   | 4.99E-01 | 1.00E+00 | -0.08 | 7.84E-01 | 9.72E-01 |
| <b>SLITRK2</b>    | 0.02   | 9.73E-01 | 1.00E+00 | 0.12  | 7.84E-01 | 9.72E-01 |
| <b>C1orf174</b>   | -0.28  | 4.26E-01 | 1.00E+00 | -0.06 | 7.84E-01 | 9.72E-01 |
| <b>TTC22</b>      | 0.01   | 9.86E-01 | 1.00E+00 | -0.19 | 7.84E-01 | 9.72E-01 |
| <b>NUB1</b>       | -0.15  | 3.60E-01 | 1.00E+00 | 0.06  | 7.84E-01 | 9.72E-01 |
| <b>RPL3P4</b>     | 0.24   | 7.59E-01 | 1.00E+00 | 0.18  | 7.84E-01 | 9.72E-01 |
| <b>FANCG</b>      | 0.07   | 7.59E-01 | 1.00E+00 | -0.09 | 7.84E-01 | 9.72E-01 |
| <b>ATG2B</b>      | 0.19   | 5.39E-01 | 1.00E+00 | -0.08 | 7.84E-01 | 9.72E-01 |
| <b>NDUFAF5</b>    | 0.20   | 3.51E-01 | 1.00E+00 | -0.07 | 7.84E-01 | 9.72E-01 |
| <b>PTMAP5</b>     | -0.05  | 8.78E-01 | 1.00E+00 | -0.14 | 7.84E-01 | 9.72E-01 |
| <b>AC105020.6</b> | 0.08   | 9.32E-01 | 1.00E+00 | 0.23  | 7.84E-01 | 9.72E-01 |
| <b>TMEM155</b>    | -15.09 | 3.64E-09 | 1.90E-06 | -0.87 | 7.84E-01 | 9.72E-01 |
| <b>GADD45B</b>    | -1.52  | 7.07E-03 | 5.12E-01 | -0.17 | 7.84E-01 | 9.72E-01 |
| <b>MAP3K5</b>     | 0.26   | 1.93E-01 | 1.00E+00 | 0.12  | 7.84E-01 | 9.72E-01 |
| <b>AC004889.1</b> | 0.37   | 3.59E-01 | 1.00E+00 | -0.14 | 7.84E-01 | 9.72E-01 |
| <b>AP001442.1</b> | 0.76   | 7.95E-01 | 1.00E+00 | -0.21 | 7.84E-01 | 9.72E-01 |
| <b>AL135818.1</b> | -0.12  | 9.07E-01 | 1.00E+00 | 0.25  | 7.84E-01 | 9.72E-01 |
| <b>ATP8A1</b>     | -0.20  | 6.06E-01 | 1.00E+00 | 0.15  | 7.84E-01 | 9.72E-01 |
| <b>AC007684.1</b> | 2.49   | 3.02E-01 | 1.00E+00 | -0.33 | 7.84E-01 | 9.72E-01 |

|            |        |          |          |       |          |          |
|------------|--------|----------|----------|-------|----------|----------|
| LINGO2     | 0.05   | 9.42E-01 | 1.00E+00 | -0.24 | 7.85E-01 | 9.72E-01 |
| AC025171.1 | -0.10  | 8.19E-01 | 1.00E+00 | 0.12  | 7.85E-01 | 9.72E-01 |
| CDK16      | -0.06  | 7.94E-01 | 1.00E+00 | 0.10  | 7.85E-01 | 9.72E-01 |
| CCT4       | 0.16   | 4.12E-01 | 1.00E+00 | -0.05 | 7.85E-01 | 9.72E-01 |
| BMPR1B     | -0.95  | 4.69E-04 | 9.32E-02 | -0.11 | 7.85E-01 | 9.72E-01 |
| DPY19L2P3  | -0.25  | 7.12E-01 | 1.00E+00 | -0.17 | 7.85E-01 | 9.72E-01 |
| RPS4XP11   | -1.26  | 7.16E-01 | 1.00E+00 | -0.24 | 7.85E-01 | 9.72E-01 |
| AL451085.1 | -2.22  | 2.41E-01 | 1.00E+00 | 0.36  | 7.85E-01 | 9.72E-01 |
| KRTAP4-8   | -20.07 | 5.11E-09 | 2.58E-06 | -0.88 | 7.85E-01 | 9.72E-01 |
| FLG2       | 0.20   | 7.74E-01 | 1.00E+00 | 0.20  | 7.85E-01 | 9.72E-01 |
| RPL15      | -0.04  | 8.87E-01 | 1.00E+00 | -0.06 | 7.85E-01 | 9.72E-01 |
| TSSK6      | -1.33  | 3.62E-02 | 1.00E+00 | 0.18  | 7.85E-01 | 9.72E-01 |
| TTPAL      | 0.31   | 4.16E-01 | 1.00E+00 | 0.07  | 7.85E-01 | 9.72E-01 |
| CHERP      | -0.32  | 2.93E-01 | 1.00E+00 | 0.11  | 7.85E-01 | 9.72E-01 |
| IPO9       | 0.00   | 1.00E+00 | 1.00E+00 | -0.05 | 7.85E-01 | 9.72E-01 |
| AL355488.1 | -0.67  | 6.56E-01 | 1.00E+00 | -0.28 | 7.85E-01 | 9.72E-01 |
| CGN        | 0.01   | 9.82E-01 | 1.00E+00 | 0.15  | 7.85E-01 | 9.72E-01 |
| AC067750.1 | 0.86   | 2.13E-01 | 1.00E+00 | 0.16  | 7.85E-01 | 9.72E-01 |
| ZCCHC18    | -0.31  | 6.25E-01 | 1.00E+00 | 0.30  | 7.85E-01 | 9.72E-01 |
| SNPH       | -0.35  | 4.62E-01 | 1.00E+00 | 0.68  | 7.85E-01 | 9.72E-01 |
| ASPM       | 0.12   | 7.59E-01 | 1.00E+00 | -0.16 | 7.85E-01 | 9.72E-01 |
| ZNF474     | 0.88   | 3.69E-01 | 1.00E+00 | -0.28 | 7.85E-01 | 9.72E-01 |
| WNK4       | 1.17   | 3.25E-01 | 1.00E+00 | 0.31  | 7.85E-01 | 9.72E-01 |
| PSMB5      | 0.16   | 3.78E-01 | 1.00E+00 | 0.09  | 7.85E-01 | 9.72E-01 |
| AZGP1      | 0.18   | 6.50E-01 | 1.00E+00 | -0.10 | 7.85E-01 | 9.72E-01 |
| KRTAP5-3   | -19.62 | 1.01E-08 | 4.69E-06 | -0.87 | 7.85E-01 | 9.72E-01 |
| AC005410.2 | -2.05  | 1.66E-01 | 1.00E+00 | -0.25 | 7.85E-01 | 9.72E-01 |
| AC108134.2 | -0.64  | 3.34E-01 | 1.00E+00 | 0.21  | 7.86E-01 | 9.72E-01 |
| KRTAP10-1  | -29.97 | 9.47E-19 | 5.54E-15 | -0.87 | 7.86E-01 | 9.72E-01 |
| CYB561D2   | -0.33  | 2.38E-01 | 1.00E+00 | 0.08  | 7.86E-01 | 9.72E-01 |
| RALGPS2    | -0.19  | 6.60E-01 | 1.00E+00 | 0.10  | 7.86E-01 | 9.72E-01 |
| THAP10     | -0.11  | 7.25E-01 | 1.00E+00 | -0.11 | 7.86E-01 | 9.72E-01 |



|            |        |          |          |       |          |          |
|------------|--------|----------|----------|-------|----------|----------|
| LINC01704  | -0.46  | 8.94E-01 | 1.00E+00 | 0.71  | 7.86E-01 | 9.72E-01 |
| AC069547.2 | -10.48 | 2.23E-03 | 2.39E-01 | 0.88  | 7.86E-01 | 9.72E-01 |
| CNGA1      | 0.69   | 3.51E-02 | 1.00E+00 | -0.11 | 7.86E-01 | 9.72E-01 |
| PCBP3      | -0.44  | 3.52E-01 | 1.00E+00 | -0.17 | 7.86E-01 | 9.72E-01 |
| PPDPFL     | 0.57   | 5.14E-01 | 1.00E+00 | -0.21 | 7.86E-01 | 9.72E-01 |
| SCN4B      | 0.17   | 7.68E-01 | 1.00E+00 | -0.21 | 7.86E-01 | 9.72E-01 |
| MAP3K21    | -0.09  | 7.70E-01 | 1.00E+00 | -0.15 | 7.86E-01 | 9.72E-01 |
| PCGF5      | 0.13   | 4.78E-01 | 1.00E+00 | -0.05 | 7.86E-01 | 9.72E-01 |
| USF3       | -0.23  | 2.40E-01 | 1.00E+00 | 0.10  | 7.86E-01 | 9.72E-01 |
| EIF5P1     | NA     | NA       | NA       | 0.22  | 7.86E-01 | 9.72E-01 |
| GLI3       | -0.32  | 3.69E-01 | 1.00E+00 | 0.09  | 7.86E-01 | 9.72E-01 |
| GATSL2     | 0.46   | 6.25E-01 | 1.00E+00 | -0.31 | 7.86E-01 | 9.72E-01 |
| LINC02185  | -0.23  | 7.15E-01 | 1.00E+00 | 0.20  | 7.86E-01 | 9.72E-01 |
| ADAM21     | -0.12  | 9.47E-01 | 1.00E+00 | 0.34  | 7.86E-01 | 9.72E-01 |
| CCDC184    | -0.18  | 6.81E-01 | 1.00E+00 | 0.29  | 7.86E-01 | 9.72E-01 |
| FENDRR     | -2.24  | 2.17E-01 | 1.00E+00 | 0.87  | 7.86E-01 | 9.72E-01 |
| GATA2-AS1  | -0.12  | 7.70E-01 | 1.00E+00 | 0.21  | 7.86E-01 | 9.72E-01 |
| FAN1       | 0.33   | 1.34E-01 | 1.00E+00 | -0.07 | 7.86E-01 | 9.72E-01 |
| NDUFA2     | -0.15  | 5.56E-01 | 1.00E+00 | -0.13 | 7.86E-01 | 9.72E-01 |
| TRNAU1AP   | -0.12  | 5.58E-01 | 1.00E+00 | -0.05 | 7.86E-01 | 9.72E-01 |
| AC016745.2 | -0.45  | 8.95E-01 | 1.00E+00 | 0.55  | 7.86E-01 | 9.72E-01 |
| KIFAP3     | 0.14   | 4.29E-01 | 1.00E+00 | 0.05  | 7.87E-01 | 9.72E-01 |
| TBRG1      | -0.01  | 9.80E-01 | 1.00E+00 | 0.07  | 7.87E-01 | 9.72E-01 |
| ATP1B1     | -0.02  | 9.76E-01 | 1.00E+00 | -0.11 | 7.87E-01 | 9.72E-01 |
| THBD       | -0.47  | 4.70E-01 | 1.00E+00 | 0.10  | 7.87E-01 | 9.72E-01 |
| NCAPD2     | -0.06  | 7.70E-01 | 1.00E+00 | 0.10  | 7.87E-01 | 9.72E-01 |
| PTGDR      | 0.32   | 6.55E-01 | 1.00E+00 | 0.20  | 7.87E-01 | 9.72E-01 |
| ZNF227     | -0.03  | 9.00E-01 | 1.00E+00 | 0.11  | 7.87E-01 | 9.72E-01 |
| HPS6       | 0.00   | 1.00E+00 | 1.00E+00 | 0.15  | 7.87E-01 | 9.72E-01 |
| AC093525.8 | 1.27   | 3.80E-01 | 1.00E+00 | 0.45  | 7.87E-01 | 9.72E-01 |
| AC018475.1 | -0.36  | 7.71E-01 | 1.00E+00 | -0.17 | 7.87E-01 | 9.72E-01 |
| ASGR1      | -0.14  | 7.57E-01 | 1.00E+00 | -0.10 | 7.87E-01 | 9.72E-01 |

|                    |       |          |          |       |          |          |
|--------------------|-------|----------|----------|-------|----------|----------|
| <b>AC004816.1</b>  | -0.05 | 9.49E-01 | 1.00E+00 | 0.14  | 7.87E-01 | 9.72E-01 |
| <b>MAP3K20-AS1</b> | -2.67 | 1.01E-01 | 1.00E+00 | 0.16  | 7.87E-01 | 9.72E-01 |
| <b>CRTAC1</b>      | -0.88 | 6.94E-02 | 1.00E+00 | 0.21  | 7.87E-01 | 9.72E-01 |
| <b>HOXB3</b>       | 0.18  | 7.78E-01 | 1.00E+00 | -0.14 | 7.87E-01 | 9.72E-01 |
| <b>CSAD</b>        | 0.24  | 5.27E-01 | 1.00E+00 | -0.10 | 7.87E-01 | 9.72E-01 |
| <b>MAP3K19</b>     | -1.21 | 5.74E-01 | 1.00E+00 | -0.29 | 7.87E-01 | 9.72E-01 |
| <b>SIM2</b>        | 0.99  | 2.30E-01 | 1.00E+00 | -0.22 | 7.87E-01 | 9.72E-01 |
| <b>SPRY1</b>       | 0.26  | 2.81E-01 | 1.00E+00 | -0.09 | 7.87E-01 | 9.72E-01 |
| <b>SYNJ2BP</b>     | 0.20  | 5.96E-01 | 1.00E+00 | 0.07  | 7.87E-01 | 9.72E-01 |
| <b>LZTS2</b>       | -0.15 | 4.65E-01 | 1.00E+00 | 0.15  | 7.88E-01 | 9.72E-01 |
| <b>EIF4EBP3</b>    | -0.20 | 8.95E-01 | 1.00E+00 | 0.24  | 7.88E-01 | 9.72E-01 |
| <b>FAM155B</b>     | 0.34  | 6.62E-01 | 1.00E+00 | 0.85  | 7.88E-01 | 9.72E-01 |
| <b>AL603965.1</b>  | -0.42 | 7.20E-01 | 1.00E+00 | 0.20  | 7.88E-01 | 9.72E-01 |
| <b>AL034397.3</b>  | 1.07  | 6.85E-01 | 1.00E+00 | 0.31  | 7.88E-01 | 9.72E-01 |
| <b>AP000679.1</b>  | -2.32 | 1.95E-01 | 1.00E+00 | 0.19  | 7.88E-01 | 9.72E-01 |
| <b>PAPOLG</b>      | 0.19  | 5.13E-01 | 1.00E+00 | -0.07 | 7.88E-01 | 9.72E-01 |
| <b>AL591721.1</b>  | 0.37  | 8.91E-01 | 1.00E+00 | -0.31 | 7.88E-01 | 9.72E-01 |
| <b>KRT9</b>        | -0.53 | 2.71E-01 | 1.00E+00 | 0.84  | 7.88E-01 | 9.72E-01 |
| <b>PDE6D</b>       | -0.47 | 2.15E-02 | 8.94E-01 | -0.07 | 7.88E-01 | 9.72E-01 |
| <b>EFNA5</b>       | -0.08 | 7.75E-01 | 1.00E+00 | -0.11 | 7.88E-01 | 9.72E-01 |
| <b>ZNF234</b>      | 0.27  | 4.08E-01 | 1.00E+00 | 0.14  | 7.88E-01 | 9.72E-01 |
| <b>AC136424.2</b>  | 1.23  | 4.69E-01 | 1.00E+00 | 0.35  | 7.88E-01 | 9.72E-01 |
| <b>AC046143.2</b>  | -0.44 | 7.32E-01 | 1.00E+00 | 0.27  | 7.88E-01 | 9.72E-01 |
| <b>REV3L-IT1</b>   | -1.91 | 5.75E-01 | 1.00E+00 | -0.33 | 7.88E-01 | 9.72E-01 |
| <b>AL109955.1</b>  | -0.30 | 8.80E-01 | 1.00E+00 | 0.29  | 7.88E-01 | 9.72E-01 |
| <b>XLOC_012467</b> | -0.68 | 4.11E-01 | 1.00E+00 | -0.28 | 7.88E-01 | 9.72E-01 |
| <b>L3HYPDH</b>     | 0.20  | 5.62E-01 | 1.00E+00 | -0.09 | 7.88E-01 | 9.72E-01 |
| <b>PCDHA4</b>      | -0.46 | 5.89E-01 | 1.00E+00 | 0.32  | 7.88E-01 | 9.72E-01 |
| <b>TRIM37</b>      | -0.05 | 7.73E-01 | 1.00E+00 | 0.07  | 7.88E-01 | 9.72E-01 |
| <b>CDKN2B-AS1</b>  | -0.49 | 7.67E-01 | 1.00E+00 | -0.29 | 7.88E-01 | 9.72E-01 |
| <b>MOV10L1</b>     | -1.97 | 2.26E-02 | 9.05E-01 | 0.24  | 7.88E-01 | 9.72E-01 |
| <b>SRRM3</b>       | -0.45 | 1.15E-01 | 1.00E+00 | 0.17  | 7.88E-01 | 9.72E-01 |

|             |       |          |          |       |          |          |
|-------------|-------|----------|----------|-------|----------|----------|
| SPEN        | -0.31 | 2.76E-01 | 1.00E+00 | 0.15  | 7.89E-01 | 9.72E-01 |
| MCM2        | -0.33 | 2.10E-01 | 1.00E+00 | 0.10  | 7.89E-01 | 9.72E-01 |
| LSMEM1      | -0.24 | 8.27E-01 | 1.00E+00 | 0.27  | 7.89E-01 | 9.72E-01 |
| SMARCD3     | -0.19 | 6.41E-01 | 1.00E+00 | -0.18 | 7.89E-01 | 9.72E-01 |
| AP1S2       | -0.30 | 3.65E-01 | 1.00E+00 | 0.08  | 7.89E-01 | 9.72E-01 |
| GRM6        | -1.50 | 4.72E-01 | 1.00E+00 | -0.39 | 7.89E-01 | 9.72E-01 |
| LINC01783   | -0.57 | 4.70E-01 | 1.00E+00 | -0.40 | 7.89E-01 | 9.72E-01 |
| AC005261.5  | -0.52 | 5.76E-01 | 1.00E+00 | -0.17 | 7.89E-01 | 9.72E-01 |
| CHAMP1      | 0.13  | 5.08E-01 | 1.00E+00 | -0.09 | 7.89E-01 | 9.72E-01 |
| AC010307.2  | -2.03 | 6.44E-02 | 1.00E+00 | -0.22 | 7.89E-01 | 9.72E-01 |
| SLC4A10     | -3.96 | 1.40E-02 | 7.46E-01 | 0.26  | 7.89E-01 | 9.72E-01 |
| AC006277.1  | -2.99 | 1.22E-01 | 1.00E+00 | -0.36 | 7.89E-01 | 9.72E-01 |
| RPL24P8     | 0.27  | 7.42E-01 | 1.00E+00 | -0.16 | 7.89E-01 | 9.72E-01 |
| PLA2G12A    | 0.01  | 9.38E-01 | 1.00E+00 | -0.07 | 7.89E-01 | 9.72E-01 |
| AF196972.1  | -1.34 | 3.39E-01 | 1.00E+00 | -0.60 | 7.89E-01 | 9.72E-01 |
| KRT16P5     | -0.97 | 4.02E-01 | 1.00E+00 | 0.17  | 7.89E-01 | 9.72E-01 |
| NELFCD      | 0.07  | 6.78E-01 | 1.00E+00 | 0.04  | 7.89E-01 | 9.72E-01 |
| G8925       | 0.38  | 8.16E-01 | 1.00E+00 | -0.86 | 7.89E-01 | 9.72E-01 |
| LTC4S       | 0.11  | 7.55E-01 | 1.00E+00 | 0.09  | 7.89E-01 | 9.72E-01 |
| FLYWCH2     | -0.28 | 2.47E-01 | 1.00E+00 | -0.07 | 7.89E-01 | 9.72E-01 |
| XLOC_005834 | 0.92  | 7.31E-01 | 1.00E+00 | -0.71 | 7.89E-01 | 9.72E-01 |
| PPAT        | 0.00  | 9.96E-01 | 1.00E+00 | 0.09  | 7.89E-01 | 9.72E-01 |
| DPRXP3      | -1.03 | 6.42E-01 | 1.00E+00 | -0.32 | 7.89E-01 | 9.72E-01 |
| NUTM2A      | 0.08  | 9.33E-01 | 1.00E+00 | 0.84  | 7.89E-01 | 9.72E-01 |
| FANCA       | -0.74 | 3.68E-02 | 1.00E+00 | -0.18 | 7.89E-01 | 9.72E-01 |
| TANGO6      | -0.23 | 3.09E-01 | 1.00E+00 | 0.09  | 7.89E-01 | 9.72E-01 |
| NSUN4       | 0.00  | 9.83E-01 | 1.00E+00 | 0.05  | 7.89E-01 | 9.72E-01 |
| TMPRSS2     | 0.08  | 9.25E-01 | 1.00E+00 | -0.21 | 7.90E-01 | 9.72E-01 |
| LINC01514   | -1.17 | 3.70E-01 | 1.00E+00 | 0.20  | 7.90E-01 | 9.72E-01 |
| CEP126      | 0.60  | 1.56E-01 | 1.00E+00 | -0.10 | 7.90E-01 | 9.72E-01 |
| AR          | 0.17  | 6.57E-01 | 1.00E+00 | -0.10 | 7.90E-01 | 9.72E-01 |
| AL080317.2  | -1.30 | 5.05E-01 | 1.00E+00 | -0.21 | 7.90E-01 | 9.72E-01 |

|                   |       |          |          |       |          |          |
|-------------------|-------|----------|----------|-------|----------|----------|
| <b>G17702</b>     | -0.99 | 3.32E-01 | 1.00E+00 | -0.27 | 7.90E-01 | 9.72E-01 |
| <b>PLEKHG5</b>    | -0.39 | 2.64E-01 | 1.00E+00 | -0.13 | 7.90E-01 | 9.73E-01 |
| <b>OR2A9P</b>     | -0.30 | 7.84E-01 | 1.00E+00 | -0.14 | 7.90E-01 | 9.73E-01 |
| <b>AC022872.1</b> | -1.95 | 2.44E-01 | 1.00E+00 | -0.32 | 7.90E-01 | 9.73E-01 |
| <b>PDLIM3</b>     | 0.31  | 5.41E-01 | 1.00E+00 | 0.08  | 7.90E-01 | 9.73E-01 |
| <b>TMPO</b>       | -0.08 | 7.52E-01 | 1.00E+00 | 0.06  | 7.90E-01 | 9.73E-01 |
| <b>AP000487.1</b> | 0.08  | 9.31E-01 | 1.00E+00 | -0.15 | 7.90E-01 | 9.73E-01 |
| <b>PSMC1P9</b>    | -1.67 | 2.73E-01 | 1.00E+00 | -0.19 | 7.90E-01 | 9.73E-01 |
| <b>SELENOI</b>    | -0.01 | 9.73E-01 | 1.00E+00 | 0.11  | 7.91E-01 | 9.73E-01 |
| <b>CKS1BP7</b>    | 0.98  | 7.78E-01 | 1.00E+00 | 0.25  | 7.91E-01 | 9.73E-01 |
| <b>STK4-AS1</b>   | -0.27 | 7.94E-01 | 1.00E+00 | -0.29 | 7.91E-01 | 9.73E-01 |
| <b>CDC14A</b>     | -0.14 | 5.93E-01 | 1.00E+00 | 0.10  | 7.91E-01 | 9.73E-01 |
| <b>RTL8B</b>      | -0.09 | 5.90E-01 | 1.00E+00 | -0.05 | 7.91E-01 | 9.73E-01 |
| <b>TAZ</b>        | -0.03 | 9.20E-01 | 1.00E+00 | -0.12 | 7.91E-01 | 9.73E-01 |
| <b>AL137847.1</b> | -1.96 | 1.84E-01 | 1.00E+00 | -0.24 | 7.91E-01 | 9.73E-01 |
| <b>PXYLP1</b>     | 0.21  | 2.70E-01 | 1.00E+00 | -0.10 | 7.91E-01 | 9.73E-01 |
| <b>AC124312.2</b> | -2.47 | 4.79E-02 | 1.00E+00 | 0.24  | 7.91E-01 | 9.73E-01 |
| <b>DLGAP5</b>     | 0.09  | 8.08E-01 | 1.00E+00 | -0.14 | 7.91E-01 | 9.73E-01 |
| <b>AC022336.3</b> | -2.30 | 1.74E-01 | 1.00E+00 | 0.46  | 7.91E-01 | 9.73E-01 |
| <b>RAB11B</b>     | -0.17 | 5.31E-01 | 1.00E+00 | -0.10 | 7.91E-01 | 9.73E-01 |
| <b>RAD54L</b>     | 0.68  | 1.45E-01 | 1.00E+00 | -0.21 | 7.91E-01 | 9.73E-01 |
| <b>AL078621.3</b> | 0.58  | 2.11E-01 | 1.00E+00 | -0.16 | 7.91E-01 | 9.73E-01 |
| <b>TOM1L1</b>     | -0.32 | 2.31E-01 | 1.00E+00 | -0.07 | 7.92E-01 | 9.73E-01 |
| <b>RTN4RL2</b>    | -1.24 | 1.11E-03 | 1.75E-01 | 0.20  | 7.92E-01 | 9.73E-01 |
| <b>ASPG</b>       | -0.01 | 9.90E-01 | 1.00E+00 | 0.16  | 7.92E-01 | 9.74E-01 |
| <b>G28942</b>     | 0.33  | 6.36E-01 | 1.00E+00 | -0.17 | 7.92E-01 | 9.74E-01 |
| <b>TPI1P2</b>     | -0.82 | 1.42E-01 | 1.00E+00 | -0.18 | 7.92E-01 | 9.74E-01 |
| <b>KRTAP9-2</b>   | -9.36 | 7.16E-03 | 5.13E-01 | -0.85 | 7.92E-01 | 9.74E-01 |
| <b>RPLP0P6</b>    | -0.19 | 6.32E-01 | 1.00E+00 | 0.14  | 7.92E-01 | 9.74E-01 |
| <b>KLRF1</b>      | -0.33 | 7.14E-01 | 1.00E+00 | 0.15  | 7.92E-01 | 9.74E-01 |
| <b>PNLIPRP3</b>   | 0.02  | 9.66E-01 | 1.00E+00 | -0.17 | 7.92E-01 | 9.74E-01 |
| <b>EIF2S1</b>     | 0.08  | 7.34E-01 | 1.00E+00 | -0.07 | 7.92E-01 | 9.74E-01 |

|                   |       |          |          |       |          |          |
|-------------------|-------|----------|----------|-------|----------|----------|
| <b>CBLC</b>       | -0.25 | 6.11E-01 | 1.00E+00 | 0.16  | 7.92E-01 | 9.74E-01 |
| <b>G31829</b>     | 3.57  | 1.44E-02 | 7.57E-01 | 0.24  | 7.92E-01 | 9.74E-01 |
| <b>ANKMY1</b>     | -0.38 | 1.90E-01 | 1.00E+00 | 0.09  | 7.92E-01 | 9.74E-01 |
| <b>SERPINI1</b>   | 0.15  | 8.14E-01 | 1.00E+00 | -0.11 | 7.92E-01 | 9.74E-01 |
| <b>HIST1H2BB</b>  | -1.87 | 5.81E-01 | 1.00E+00 | -0.46 | 7.92E-01 | 9.74E-01 |
| <b>CCDC85B</b>    | -0.62 | 1.76E-02 | 8.33E-01 | 0.17  | 7.92E-01 | 9.74E-01 |
| <b>SEC11A</b>     | 0.20  | 3.43E-01 | 1.00E+00 | 0.04  | 7.92E-01 | 9.74E-01 |
| <b>AL589765.4</b> | 0.15  | 7.58E-01 | 1.00E+00 | 0.30  | 7.92E-01 | 9.74E-01 |
| <b>PDCL3P5</b>    | -1.44 | 1.89E-01 | 1.00E+00 | 0.13  | 7.92E-01 | 9.74E-01 |
| <b>G25097</b>     | -1.09 | 3.83E-01 | 1.00E+00 | 0.84  | 7.92E-01 | 9.74E-01 |
| <b>PDLIM2</b>     | -0.07 | 8.65E-01 | 1.00E+00 | -0.07 | 7.93E-01 | 9.74E-01 |
| <b>PIIG</b>       | 0.07  | 7.22E-01 | 1.00E+00 | 0.05  | 7.93E-01 | 9.74E-01 |
| <b>TMSB15B</b>    | -0.21 | 6.52E-01 | 1.00E+00 | 0.11  | 7.93E-01 | 9.74E-01 |
| <b>LIMCH1</b>     | 0.54  | 2.09E-01 | 1.00E+00 | -0.08 | 7.93E-01 | 9.74E-01 |
| <b>AC097376.1</b> | -2.56 | 6.72E-02 | 1.00E+00 | 0.32  | 7.93E-01 | 9.74E-01 |
| <b>RPL26L1</b>    | -0.30 | 9.97E-02 | 1.00E+00 | 0.06  | 7.93E-01 | 9.74E-01 |
| <b>AC034213.1</b> | 0.62  | 8.53E-01 | 1.00E+00 | 0.31  | 7.93E-01 | 9.74E-01 |
| <b>AC024257.3</b> | -0.16 | 9.43E-01 | 1.00E+00 | -0.31 | 7.93E-01 | 9.74E-01 |
| <b>ANKRD19P</b>   | 0.73  | 4.13E-01 | 1.00E+00 | 0.11  | 7.93E-01 | 9.74E-01 |
| <b>ADGRE1</b>     | -0.15 | 9.36E-01 | 1.00E+00 | 0.83  | 7.93E-01 | 9.74E-01 |
| <b>TTLL11</b>     | 0.01  | 9.71E-01 | 1.00E+00 | -0.26 | 7.93E-01 | 9.74E-01 |
| <b>RPL35</b>      | -0.14 | 6.33E-01 | 1.00E+00 | 0.07  | 7.93E-01 | 9.74E-01 |
| <b>SNRPA1</b>     | 0.13  | 5.84E-01 | 1.00E+00 | -0.06 | 7.93E-01 | 9.74E-01 |
| <b>TIMM10</b>     | -0.01 | 9.59E-01 | 1.00E+00 | -0.05 | 7.93E-01 | 9.74E-01 |
| <b>UCKL1-AS1</b>  | -1.74 | 3.27E-01 | 1.00E+00 | 0.31  | 7.93E-01 | 9.74E-01 |
| <b>AP002851.1</b> | -0.09 | 8.95E-01 | 1.00E+00 | 0.11  | 7.93E-01 | 9.74E-01 |
| <b>AC051619.5</b> | -2.38 | 9.17E-02 | 1.00E+00 | -0.28 | 7.93E-01 | 9.74E-01 |
| <b>PHTF2</b>      | 0.07  | 8.43E-01 | 1.00E+00 | 0.05  | 7.93E-01 | 9.74E-01 |
| <b>AC020663.3</b> | -0.35 | 9.18E-01 | 1.00E+00 | 0.25  | 7.93E-01 | 9.74E-01 |
| <b>BEND6</b>      | -0.12 | 8.82E-01 | 1.00E+00 | -0.13 | 7.93E-01 | 9.74E-01 |
| <b>AMFR</b>       | 0.18  | 4.19E-01 | 1.00E+00 | 0.12  | 7.93E-01 | 9.74E-01 |
| <b>SPRY4-AS1</b>  | -0.73 | 7.10E-01 | 1.00E+00 | -0.22 | 7.93E-01 | 9.74E-01 |

|            |        |          |          |       |          |          |
|------------|--------|----------|----------|-------|----------|----------|
| LINC01686  | -0.55  | 4.95E-01 | 1.00E+00 | 0.23  | 7.93E-01 | 9.74E-01 |
| MGAT4B     | -0.01  | 9.57E-01 | 1.00E+00 | 0.24  | 7.93E-01 | 9.74E-01 |
| ZYG11A     | -1.89  | 1.73E-01 | 1.00E+00 | 0.29  | 7.94E-01 | 9.74E-01 |
| SSSCA1-AS1 | -0.35  | 3.59E-01 | 1.00E+00 | 0.09  | 7.94E-01 | 9.74E-01 |
| G32993     | -1.16  | 2.91E-01 | 1.00E+00 | 0.21  | 7.94E-01 | 9.74E-01 |
| CDH6       | -0.38  | 4.16E-01 | 1.00E+00 | 0.13  | 7.94E-01 | 9.74E-01 |
| AC012085.1 | -0.66  | 6.93E-02 | 1.00E+00 | -0.10 | 7.94E-01 | 9.74E-01 |
| LZTR1      | 0.39   | 3.76E-01 | 1.00E+00 | 0.11  | 7.94E-01 | 9.74E-01 |
| ZNF792     | -0.11  | 7.25E-01 | 1.00E+00 | 0.18  | 7.94E-01 | 9.74E-01 |
| GAS2L2     | 0.75   | 4.40E-01 | 1.00E+00 | 0.31  | 7.94E-01 | 9.74E-01 |
| FBLL1      | -0.68  | 4.22E-01 | 1.00E+00 | 0.31  | 7.94E-01 | 9.74E-01 |
| CLIC1P1    | 0.52   | 8.81E-01 | 1.00E+00 | -0.21 | 7.94E-01 | 9.74E-01 |
| SORCS1     | -0.29  | 5.50E-01 | 1.00E+00 | -0.21 | 7.94E-01 | 9.74E-01 |
| KRTAP4-5   | -12.19 | 4.13E-04 | 8.56E-02 | -0.84 | 7.94E-01 | 9.74E-01 |
| EPX        | 0.39   | 7.15E-01 | 1.00E+00 | 0.20  | 7.94E-01 | 9.74E-01 |
| HSPA4L     | -0.11  | 7.30E-01 | 1.00E+00 | 0.10  | 7.94E-01 | 9.74E-01 |
| ZNF416     | 0.15   | 6.14E-01 | 1.00E+00 | 0.07  | 7.94E-01 | 9.74E-01 |
| AC093702.1 | -2.87  | 5.71E-02 | 1.00E+00 | -0.40 | 7.94E-01 | 9.74E-01 |
| KREMEN1    | -0.06  | 8.21E-01 | 1.00E+00 | -0.13 | 7.94E-01 | 9.74E-01 |
| AL390039.1 | NA     | NA       | NA       | -0.21 | 7.94E-01 | 9.74E-01 |
| CNRIP1     | 0.39   | 3.71E-01 | 1.00E+00 | 0.12  | 7.95E-01 | 9.74E-01 |
| NFIB       | 0.15   | 6.41E-01 | 1.00E+00 | -0.09 | 7.95E-01 | 9.74E-01 |
| CD5        | -0.53  | 2.69E-01 | 1.00E+00 | 0.82  | 7.95E-01 | 9.74E-01 |
| TCTN3      | 0.00   | 9.89E-01 | 1.00E+00 | -0.05 | 7.95E-01 | 9.74E-01 |
| ATP6V1E2   | -0.14  | 5.83E-01 | 1.00E+00 | -0.09 | 7.95E-01 | 9.74E-01 |
| LGR5       | 0.88   | 5.23E-01 | 1.00E+00 | -0.75 | 7.95E-01 | 9.74E-01 |
| FBXW7      | -0.14  | 6.74E-01 | 1.00E+00 | 0.11  | 7.95E-01 | 9.74E-01 |
| PRPF3      | -0.08  | 7.20E-01 | 1.00E+00 | 0.06  | 7.95E-01 | 9.74E-01 |
| SLC22A4    | 0.56   | 4.63E-01 | 1.00E+00 | 0.13  | 7.95E-01 | 9.74E-01 |
| MIEF2      | 0.13   | 5.60E-01 | 1.00E+00 | 0.09  | 7.95E-01 | 9.74E-01 |
| AC121338.2 | 0.26   | 6.56E-01 | 1.00E+00 | -0.20 | 7.95E-01 | 9.74E-01 |
| ZNF501     | 0.19   | 5.64E-01 | 1.00E+00 | 0.11  | 7.95E-01 | 9.74E-01 |

|                    |       |          |          |       |          |          |
|--------------------|-------|----------|----------|-------|----------|----------|
| <b>AC068473.5</b>  | 0.24  | 2.84E-01 | 1.00E+00 | -0.09 | 7.95E-01 | 9.74E-01 |
| <b>SORD</b>        | 0.16  | 7.58E-01 | 1.00E+00 | -0.10 | 7.95E-01 | 9.74E-01 |
| <b>AL592295.3</b>  | -2.92 | 1.10E-01 | 1.00E+00 | -0.30 | 7.95E-01 | 9.74E-01 |
| <b>RPL18AP7</b>    | -0.10 | 9.59E-01 | 1.00E+00 | 0.24  | 7.95E-01 | 9.74E-01 |
| <b>AC007041.1</b>  | -2.96 | 3.82E-01 | 1.00E+00 | -0.17 | 7.95E-01 | 9.74E-01 |
| <b>IFNAR2</b>      | 0.57  | 6.10E-01 | 1.00E+00 | 0.14  | 7.95E-01 | 9.74E-01 |
| <b>AC112715.1</b>  | 0.05  | 9.88E-01 | 1.00E+00 | 0.30  | 7.95E-01 | 9.74E-01 |
| <b>IPO13</b>       | -0.16 | 3.74E-01 | 1.00E+00 | 0.14  | 7.95E-01 | 9.74E-01 |
| <b>AC093726.2</b>  | -2.09 | 3.26E-01 | 1.00E+00 | 0.37  | 7.95E-01 | 9.74E-01 |
| <b>XLOC_011448</b> | -0.84 | 5.90E-01 | 1.00E+00 | -0.16 | 7.95E-01 | 9.74E-01 |
| <b>ZNF500</b>      | -0.30 | 2.30E-01 | 1.00E+00 | 0.12  | 7.96E-01 | 9.75E-01 |
| <b>ZNF223</b>      | 1.20  | 2.05E-01 | 1.00E+00 | -0.16 | 7.96E-01 | 9.75E-01 |
| <b>EXTL3-AS1</b>   | 3.02  | 1.68E-01 | 1.00E+00 | 0.35  | 7.96E-01 | 9.75E-01 |
| <b>AC024995.1</b>  | NA    | NA       | NA       | -0.23 | 7.96E-01 | 9.75E-01 |
| <b>ACTG2</b>       | -0.45 | 5.06E-01 | 1.00E+00 | 0.12  | 7.96E-01 | 9.75E-01 |
| <b>GOLGA8N</b>     | 0.52  | 6.16E-01 | 1.00E+00 | 0.25  | 7.96E-01 | 9.75E-01 |
| <b>RNF212</b>      | 0.07  | 8.52E-01 | 1.00E+00 | -0.12 | 7.96E-01 | 9.75E-01 |
| <b>SPAG8</b>       | -0.83 | 4.12E-01 | 1.00E+00 | -0.22 | 7.96E-01 | 9.75E-01 |
| <b>ANKRD22</b>     | 0.29  | 4.84E-01 | 1.00E+00 | -0.16 | 7.96E-01 | 9.75E-01 |
| <b>AC073343.1</b>  | -0.79 | 4.92E-01 | 1.00E+00 | 0.35  | 7.96E-01 | 9.75E-01 |
| <b>AC244154.1</b>  | -0.24 | 6.91E-01 | 1.00E+00 | 0.16  | 7.96E-01 | 9.75E-01 |
| <b>GLP1R</b>       | -0.63 | 4.89E-01 | 1.00E+00 | 0.33  | 7.96E-01 | 9.75E-01 |
| <b>CPXM2</b>       | -0.09 | 8.36E-01 | 1.00E+00 | 0.10  | 7.96E-01 | 9.75E-01 |
| <b>HEXDC-IT1</b>   | 0.02  | 9.90E-01 | 1.00E+00 | 0.32  | 7.96E-01 | 9.75E-01 |
| <b>TMEM9B-AS1</b>  | -0.21 | 6.91E-01 | 1.00E+00 | -0.18 | 7.96E-01 | 9.75E-01 |
| <b>CD1B</b>        | -0.47 | 5.64E-01 | 1.00E+00 | -0.22 | 7.97E-01 | 9.75E-01 |
| <b>TMPRSS9</b>     | -0.26 | 7.28E-01 | 1.00E+00 | 0.30  | 7.97E-01 | 9.75E-01 |
| <b>TCF7L1</b>      | 0.16  | 7.24E-01 | 1.00E+00 | 0.12  | 7.97E-01 | 9.75E-01 |
| <b>HNRNPKP1</b>    | -1.10 | 7.53E-01 | 1.00E+00 | 0.23  | 7.97E-01 | 9.75E-01 |
| <b>SF3A1</b>       | -0.22 | 2.88E-01 | 1.00E+00 | 0.07  | 7.97E-01 | 9.75E-01 |
| <b>G4402</b>       | -0.01 | 9.92E-01 | 1.00E+00 | -0.27 | 7.97E-01 | 9.75E-01 |
| <b>SCYL2</b>       | 0.00  | 9.96E-01 | 1.00E+00 | 0.04  | 7.97E-01 | 9.75E-01 |

|                    |       |          |          |       |          |          |
|--------------------|-------|----------|----------|-------|----------|----------|
| <b>AC079322.1</b>  | 0.08  | 9.69E-01 | 1.00E+00 | -0.37 | 7.97E-01 | 9.75E-01 |
| <b>AC013652.1</b>  | -0.53 | 4.47E-01 | 1.00E+00 | -0.16 | 7.97E-01 | 9.75E-01 |
| <b>CDS1</b>        | 0.37  | 2.74E-01 | 1.00E+00 | -0.10 | 7.97E-01 | 9.75E-01 |
| <b>TRIM32</b>      | 0.14  | 4.58E-01 | 1.00E+00 | -0.06 | 7.97E-01 | 9.75E-01 |
| <b>LTA4H</b>       | 0.17  | 5.36E-01 | 1.00E+00 | 0.06  | 7.97E-01 | 9.75E-01 |
| <b>AC011773.3</b>  | 1.34  | 6.98E-01 | 1.00E+00 | -0.31 | 7.97E-01 | 9.75E-01 |
| <b>MUM1L1</b>      | -2.22 | 8.29E-02 | 1.00E+00 | 0.31  | 7.97E-01 | 9.75E-01 |
| <b>AC245452.1</b>  | -0.60 | 2.41E-01 | 1.00E+00 | 0.14  | 7.97E-01 | 9.75E-01 |
| <b>AL031587.3</b>  | -0.40 | 7.90E-01 | 1.00E+00 | -0.28 | 7.98E-01 | 9.75E-01 |
| <b>LPAR5</b>       | -0.38 | 2.27E-01 | 1.00E+00 | 0.10  | 7.98E-01 | 9.75E-01 |
| <b>GRAMD2B</b>     | 0.14  | 6.55E-01 | 1.00E+00 | -0.07 | 7.98E-01 | 9.75E-01 |
| <b>AC093909.6</b>  | 0.26  | 6.00E-01 | 1.00E+00 | -0.11 | 7.98E-01 | 9.75E-01 |
| <b>AC021483.2</b>  | 1.31  | 5.67E-01 | 1.00E+00 | 0.40  | 7.98E-01 | 9.75E-01 |
| <b>IER2</b>        | -1.13 | 5.44E-02 | 1.00E+00 | -0.11 | 7.98E-01 | 9.75E-01 |
| <b>ZNF696</b>      | -0.03 | 8.99E-01 | 1.00E+00 | -0.11 | 7.98E-01 | 9.75E-01 |
| <b>AJUBA</b>       | -0.04 | 8.93E-01 | 1.00E+00 | -0.10 | 7.98E-01 | 9.75E-01 |
| <b>CACNG8</b>      | -4.29 | 3.18E-05 | 8.82E-03 | -0.29 | 7.98E-01 | 9.75E-01 |
| <b>NEGR1</b>       | 0.34  | 4.35E-01 | 1.00E+00 | 0.14  | 7.98E-01 | 9.75E-01 |
| <b>CNOT6LP1</b>    | -0.04 | 9.57E-01 | 1.00E+00 | 0.16  | 7.98E-01 | 9.75E-01 |
| <b>GALC</b>        | 0.23  | 3.53E-01 | 1.00E+00 | -0.06 | 7.98E-01 | 9.75E-01 |
| <b>ARL4AP5</b>     | -0.08 | 9.82E-01 | 1.00E+00 | -0.19 | 7.98E-01 | 9.75E-01 |
| <b>AURKAIP1</b>    | -0.20 | 3.59E-01 | 1.00E+00 | -0.05 | 7.98E-01 | 9.75E-01 |
| <b>SNHG17</b>      | 0.44  | 6.12E-02 | 1.00E+00 | -0.09 | 7.98E-01 | 9.75E-01 |
| <b>XLOC_012664</b> | NA    | NA       | NA       | -0.49 | 7.98E-01 | 9.75E-01 |
| <b>BANF1</b>       | -0.11 | 5.62E-01 | 1.00E+00 | 0.04  | 7.98E-01 | 9.75E-01 |
| <b>PLS1</b>        | -0.37 | 3.21E-01 | 1.00E+00 | -0.13 | 7.98E-01 | 9.75E-01 |
| <b>ADPRHL1</b>     | -0.41 | 2.27E-01 | 1.00E+00 | -0.08 | 7.98E-01 | 9.75E-01 |
| <b>TOR3A</b>       | -0.06 | 7.15E-01 | 1.00E+00 | 0.07  | 7.98E-01 | 9.75E-01 |
| <b>FLJ13224</b>    | -0.13 | 9.48E-01 | 1.00E+00 | -0.28 | 7.98E-01 | 9.75E-01 |
| <b>USP53</b>       | 0.51  | 4.47E-02 | 1.00E+00 | -0.06 | 7.98E-01 | 9.75E-01 |
| <b>AQP6</b>        | -0.30 | 8.57E-01 | 1.00E+00 | -0.42 | 7.98E-01 | 9.75E-01 |
| <b>FTLP3</b>       | -0.64 | 5.84E-01 | 1.00E+00 | -0.19 | 7.98E-01 | 9.75E-01 |



|                   |       |          |          |       |          |          |
|-------------------|-------|----------|----------|-------|----------|----------|
| <b>NFIX</b>       | -0.34 | 1.56E-01 | 1.00E+00 | -0.15 | 7.98E-01 | 9.75E-01 |
| <b>HMGCLL1</b>    | 0.41  | 5.95E-01 | 1.00E+00 | 0.26  | 7.98E-01 | 9.75E-01 |
| <b>EIF4A2</b>     | 0.57  | 3.70E-02 | 1.00E+00 | 0.07  | 7.99E-01 | 9.75E-01 |
| <b>RIPPLY3</b>    | -1.01 | 3.86E-01 | 1.00E+00 | -0.29 | 7.99E-01 | 9.75E-01 |
| <b>CCDC68</b>     | 0.71  | 2.22E-01 | 1.00E+00 | -0.50 | 7.99E-01 | 9.75E-01 |
| <b>EPB41L4A</b>   | -0.15 | 4.69E-01 | 1.00E+00 | -0.06 | 7.99E-01 | 9.75E-01 |
| <b>FAM25C</b>     | 0.66  | 4.23E-01 | 1.00E+00 | -0.20 | 7.99E-01 | 9.75E-01 |
| <b>RPS4XP3</b>    | -1.71 | 6.18E-01 | 1.00E+00 | -0.20 | 7.99E-01 | 9.75E-01 |
| <b>MLYCD</b>      | 0.31  | 2.28E-01 | 1.00E+00 | -0.17 | 7.99E-01 | 9.75E-01 |
| <b>CD40</b>       | -0.20 | 4.53E-01 | 1.00E+00 | -0.08 | 7.99E-01 | 9.75E-01 |
| <b>APC</b>        | -0.23 | 2.44E-01 | 1.00E+00 | 0.07  | 7.99E-01 | 9.75E-01 |
| <b>HDGFL2</b>     | -0.12 | 5.32E-01 | 1.00E+00 | 0.23  | 7.99E-01 | 9.75E-01 |
| <b>OR7E108P</b>   | 0.28  | 7.43E-01 | 1.00E+00 | -0.26 | 7.99E-01 | 9.75E-01 |
| <b>AL096828.3</b> | 0.40  | 8.34E-01 | 1.00E+00 | 0.30  | 7.99E-01 | 9.75E-01 |
| <b>EN1</b>        | -0.24 | 5.60E-01 | 1.00E+00 | -0.12 | 7.99E-01 | 9.75E-01 |
| <b>CTSV</b>       | 0.28  | 6.74E-01 | 1.00E+00 | -0.17 | 7.99E-01 | 9.75E-01 |
| <b>CKS2</b>       | 0.32  | 3.38E-01 | 1.00E+00 | -0.11 | 7.99E-01 | 9.75E-01 |
| <b>LINC00863</b>  | -0.26 | 5.27E-01 | 1.00E+00 | -0.07 | 7.99E-01 | 9.75E-01 |
| <b>VTCN1</b>      | 0.42  | 6.38E-01 | 1.00E+00 | -0.22 | 7.99E-01 | 9.75E-01 |
| <b>DLX5</b>       | -0.07 | 8.77E-01 | 1.00E+00 | 0.12  | 7.99E-01 | 9.75E-01 |
| <b>STAG3L3</b>    | -0.04 | 9.08E-01 | 1.00E+00 | 0.08  | 7.99E-01 | 9.75E-01 |
| <b>TLL2</b>       | -1.93 | 1.07E-02 | 6.39E-01 | 0.23  | 7.99E-01 | 9.75E-01 |
| <b>KLHDC3</b>     | 0.14  | 5.46E-01 | 1.00E+00 | 0.04  | 7.99E-01 | 9.75E-01 |
| <b>RPS23</b>      | -0.91 | 5.48E-02 | 1.00E+00 | 0.10  | 7.99E-01 | 9.75E-01 |
| <b>DNM1P46</b>    | 1.58  | 3.20E-01 | 1.00E+00 | -0.25 | 7.99E-01 | 9.75E-01 |
| <b>DACT3</b>      | -0.40 | 3.75E-01 | 1.00E+00 | 0.23  | 7.99E-01 | 9.75E-01 |
| <b>AC136424.1</b> | 1.51  | 6.62E-01 | 1.00E+00 | -0.82 | 8.00E-01 | 9.75E-01 |
| <b>CIAO1</b>      | 0.16  | 3.89E-01 | 1.00E+00 | 0.04  | 8.00E-01 | 9.75E-01 |
| <b>SPACA4</b>     | -1.14 | 1.60E-01 | 1.00E+00 | 0.29  | 8.00E-01 | 9.75E-01 |
| <b>WDR25</b>      | -0.13 | 6.10E-01 | 1.00E+00 | -0.05 | 8.00E-01 | 9.75E-01 |
| <b>AC093388.1</b> | 0.59  | 4.38E-01 | 1.00E+00 | -0.16 | 8.00E-01 | 9.75E-01 |
| <b>PTCSC2</b>     | -0.72 | 8.34E-01 | 1.00E+00 | 0.41  | 8.00E-01 | 9.75E-01 |

|                    |       |          |          |       |          |          |
|--------------------|-------|----------|----------|-------|----------|----------|
| <b>HRASLS2</b>     | -3.28 | 1.10E-01 | 1.00E+00 | -0.76 | 8.00E-01 | 9.75E-01 |
| <b>BAIAP3</b>      | -0.38 | 3.27E-01 | 1.00E+00 | -0.15 | 8.00E-01 | 9.75E-01 |
| <b>AL109741.1</b>  | 0.00  | 9.97E-01 | 1.00E+00 | -0.21 | 8.00E-01 | 9.75E-01 |
| <b>AC245041.1</b>  | -0.19 | 7.81E-01 | 1.00E+00 | 0.15  | 8.00E-01 | 9.75E-01 |
| <b>PSMA6P2</b>     | NA    | NA       | NA       | 0.17  | 8.00E-01 | 9.75E-01 |
| <b>WBP1</b>        | 0.06  | 8.49E-01 | 1.00E+00 | -0.09 | 8.00E-01 | 9.75E-01 |
| <b>AC022568.1</b>  | -1.40 | 6.04E-01 | 1.00E+00 | -0.41 | 8.00E-01 | 9.75E-01 |
| <b>AC069528.2</b>  | -0.44 | 7.99E-01 | 1.00E+00 | -0.22 | 8.00E-01 | 9.75E-01 |
| <b>GLI2</b>        | -0.88 | 6.29E-02 | 1.00E+00 | -0.16 | 8.00E-01 | 9.75E-01 |
| <b>MIR17HG</b>     | 0.27  | 8.86E-01 | 1.00E+00 | 0.33  | 8.00E-01 | 9.75E-01 |
| <b>UFSP1</b>       | 0.14  | 7.58E-01 | 1.00E+00 | 0.07  | 8.00E-01 | 9.75E-01 |
| <b>NCBP1</b>       | 0.01  | 9.58E-01 | 1.00E+00 | -0.05 | 8.00E-01 | 9.75E-01 |
| <b>KLHL15</b>      | 0.09  | 7.79E-01 | 1.00E+00 | -0.11 | 8.00E-01 | 9.75E-01 |
| <b>PTGFR</b>       | 0.77  | 1.64E-01 | 1.00E+00 | 0.11  | 8.00E-01 | 9.75E-01 |
| <b>SLC25A5-AS1</b> | 0.97  | 8.46E-02 | 1.00E+00 | 0.14  | 8.00E-01 | 9.75E-01 |
| <b>KLF10</b>       | -0.49 | 2.90E-01 | 1.00E+00 | 0.07  | 8.01E-01 | 9.75E-01 |
| <b>ABCD4</b>       | 0.06  | 8.34E-01 | 1.00E+00 | 0.08  | 8.01E-01 | 9.75E-01 |
| <b>LINC01659</b>   | 1.10  | 1.39E-01 | 1.00E+00 | -0.26 | 8.01E-01 | 9.75E-01 |
| <b>PPP4R1L</b>     | -0.04 | 9.34E-01 | 1.00E+00 | -0.10 | 8.01E-01 | 9.75E-01 |
| <b>RTKN</b>        | -0.26 | 4.24E-01 | 1.00E+00 | 0.09  | 8.01E-01 | 9.75E-01 |
| <b>SPATA32</b>     | -1.61 | 5.83E-01 | 1.00E+00 | -0.28 | 8.01E-01 | 9.75E-01 |
| <b>TRPM2-AS</b>    | 0.59  | 8.39E-01 | 1.00E+00 | 0.28  | 8.01E-01 | 9.75E-01 |
| <b>AL390957.1</b>  | -0.26 | 8.02E-01 | 1.00E+00 | 0.20  | 8.01E-01 | 9.75E-01 |
| <b>TRAPPC8</b>     | 0.31  | 2.36E-01 | 1.00E+00 | -0.06 | 8.01E-01 | 9.75E-01 |
| <b>AC114737.1</b>  | 1.13  | 7.44E-01 | 1.00E+00 | 0.35  | 8.01E-01 | 9.75E-01 |
| <b>SEC23IP</b>     | 0.31  | 1.35E-01 | 1.00E+00 | 0.03  | 8.01E-01 | 9.75E-01 |
| <b>CANX</b>        | 0.06  | 7.82E-01 | 1.00E+00 | -0.05 | 8.01E-01 | 9.75E-01 |
| <b>EFCAB6</b>      | -0.42 | 4.44E-01 | 1.00E+00 | -0.14 | 8.01E-01 | 9.75E-01 |
| <b>RPSAP12</b>     | 0.22  | 7.01E-01 | 1.00E+00 | -0.10 | 8.01E-01 | 9.75E-01 |
| <b>GMEB2</b>       | -0.04 | 8.69E-01 | 1.00E+00 | 0.13  | 8.01E-01 | 9.75E-01 |
| <b>VSIG10</b>      | 0.00  | 9.86E-01 | 1.00E+00 | 0.07  | 8.01E-01 | 9.75E-01 |
| <b>MAP7</b>        | -0.30 | 3.76E-01 | 1.00E+00 | 0.09  | 8.01E-01 | 9.75E-01 |

|                    |       |          |          |       |          |          |
|--------------------|-------|----------|----------|-------|----------|----------|
| <b>AC090181.3</b>  | -0.56 | 8.73E-01 | 1.00E+00 | 0.34  | 8.01E-01 | 9.75E-01 |
| <b>AFM</b>         | -1.73 | 3.68E-01 | 1.00E+00 | -0.32 | 8.01E-01 | 9.75E-01 |
| <b>EML2</b>        | -0.01 | 9.51E-01 | 1.00E+00 | -0.11 | 8.01E-01 | 9.75E-01 |
| <b>RNASEH1</b>     | 0.15  | 4.57E-01 | 1.00E+00 | 0.07  | 8.01E-01 | 9.75E-01 |
| <b>SAC3D1</b>      | 0.00  | 9.98E-01 | 1.00E+00 | -0.19 | 8.01E-01 | 9.75E-01 |
| <b>IQSEC3</b>      | 1.73  | 1.05E-01 | 1.00E+00 | -0.24 | 8.01E-01 | 9.75E-01 |
| <b>GPR155</b>      | -0.07 | 7.98E-01 | 1.00E+00 | -0.07 | 8.02E-01 | 9.75E-01 |
| <b>MARK1</b>       | 0.05  | 8.99E-01 | 1.00E+00 | 0.12  | 8.02E-01 | 9.75E-01 |
| <b>OXT</b>         | 0.21  | 8.38E-01 | 1.00E+00 | -0.21 | 8.02E-01 | 9.75E-01 |
| <b>RIC8A</b>       | -0.10 | 5.15E-01 | 1.00E+00 | 0.04  | 8.02E-01 | 9.75E-01 |
| <b>SERPIND1</b>    | -1.63 | 3.41E-01 | 1.00E+00 | 0.71  | 8.02E-01 | 9.75E-01 |
| <b>RAB6C-AS1</b>   | -0.22 | 9.36E-01 | 1.00E+00 | 0.29  | 8.02E-01 | 9.75E-01 |
| <b>CTNNA3</b>      | 0.15  | 8.01E-01 | 1.00E+00 | -0.20 | 8.02E-01 | 9.75E-01 |
| <b>C1GALT1C1L</b>  | 0.37  | 5.72E-01 | 1.00E+00 | -0.14 | 8.02E-01 | 9.75E-01 |
| <b>JAG1</b>        | -0.29 | 9.79E-02 | 1.00E+00 | 0.09  | 8.02E-01 | 9.75E-01 |
| <b>AC106872.5</b>  | 3.02  | 8.84E-02 | 1.00E+00 | 0.27  | 8.02E-01 | 9.75E-01 |
| <b>AC124067.2</b>  | -1.58 | 6.63E-02 | 1.00E+00 | -0.14 | 8.02E-01 | 9.75E-01 |
| <b>MPST</b>        | 0.09  | 7.72E-01 | 1.00E+00 | -0.05 | 8.02E-01 | 9.75E-01 |
| <b>AIF1L</b>       | 0.19  | 6.39E-01 | 1.00E+00 | -0.09 | 8.02E-01 | 9.75E-01 |
| <b>ADRM1</b>       | -0.23 | 3.45E-01 | 1.00E+00 | 0.09  | 8.02E-01 | 9.75E-01 |
| <b>CDH7</b>        | -0.88 | 5.00E-01 | 1.00E+00 | 0.36  | 8.02E-01 | 9.75E-01 |
| <b>ZFYVE19</b>     | 0.13  | 4.97E-01 | 1.00E+00 | 0.05  | 8.02E-01 | 9.75E-01 |
| <b>LRRC8E</b>      | -0.74 | 3.33E-01 | 1.00E+00 | 0.15  | 8.02E-01 | 9.75E-01 |
| <b>XLOC_004631</b> | 0.10  | 8.57E-01 | 1.00E+00 | -0.15 | 8.02E-01 | 9.75E-01 |
| <b>RPL10AP6</b>    | -0.64 | 2.68E-01 | 1.00E+00 | 0.19  | 8.02E-01 | 9.75E-01 |
| <b>GIPC3</b>       | -0.33 | 5.30E-01 | 1.00E+00 | 0.21  | 8.02E-01 | 9.75E-01 |
| <b>KLHL4</b>       | 0.02  | 9.82E-01 | 1.00E+00 | -0.50 | 8.02E-01 | 9.75E-01 |
| <b>DFFA</b>        | -0.22 | 2.81E-01 | 1.00E+00 | 0.04  | 8.02E-01 | 9.75E-01 |
| <b>CAMK1D</b>      | 0.01  | 9.84E-01 | 1.00E+00 | 0.08  | 8.02E-01 | 9.75E-01 |
| <b>RBM4</b>        | -0.61 | 9.51E-03 | 6.06E-01 | 0.09  | 8.02E-01 | 9.75E-01 |
| <b>C16orf70</b>    | -0.15 | 6.43E-01 | 1.00E+00 | 0.11  | 8.02E-01 | 9.75E-01 |
| <b>AC020904.2</b>  | -0.45 | 6.94E-01 | 1.00E+00 | 0.08  | 8.02E-01 | 9.75E-01 |

|                   |       |          |          |       |          |          |
|-------------------|-------|----------|----------|-------|----------|----------|
| <b>RPL19P21</b>   | NA    | NA       | NA       | 0.44  | 8.02E-01 | 9.75E-01 |
| <b>CSE1L-AS1</b>  | -0.05 | 9.88E-01 | 1.00E+00 | 0.39  | 8.02E-01 | 9.75E-01 |
| <b>ANKRD28</b>    | 0.10  | 5.63E-01 | 1.00E+00 | 0.06  | 8.02E-01 | 9.75E-01 |
| <b>COASY</b>      | -0.15 | 4.41E-01 | 1.00E+00 | 0.06  | 8.03E-01 | 9.75E-01 |
| <b>TM4SF1</b>     | 0.24  | 6.25E-01 | 1.00E+00 | 0.08  | 8.03E-01 | 9.75E-01 |
| <b>RPL39P3</b>    | -0.28 | 5.42E-01 | 1.00E+00 | 0.13  | 8.03E-01 | 9.75E-01 |
| <b>C8orf48</b>    | -0.12 | 7.02E-01 | 1.00E+00 | -0.12 | 8.03E-01 | 9.75E-01 |
| <b>LINC02541</b>  | 0.03  | 9.38E-01 | 1.00E+00 | 0.13  | 8.03E-01 | 9.75E-01 |
| <b>LMX1A</b>      | -0.05 | 9.54E-01 | 1.00E+00 | -0.28 | 8.03E-01 | 9.75E-01 |
| <b>TUSC8</b>      | -0.66 | 5.90E-01 | 1.00E+00 | -0.24 | 8.03E-01 | 9.75E-01 |
| <b>STK11IP</b>    | -0.04 | 8.88E-01 | 1.00E+00 | 0.14  | 8.03E-01 | 9.75E-01 |
| <b>ATP7B</b>      | 0.27  | 5.75E-01 | 1.00E+00 | 0.18  | 8.03E-01 | 9.75E-01 |
| <b>SLC24A3</b>    | 0.00  | 9.95E-01 | 1.00E+00 | 0.12  | 8.03E-01 | 9.75E-01 |
| <b>ABTB2</b>      | -0.14 | 5.97E-01 | 1.00E+00 | 0.13  | 8.03E-01 | 9.75E-01 |
| <b>WDR19</b>      | 0.06  | 8.31E-01 | 1.00E+00 | 0.07  | 8.03E-01 | 9.75E-01 |
| <b>PA2G4</b>      | -0.14 | 5.36E-01 | 1.00E+00 | -0.04 | 8.03E-01 | 9.75E-01 |
| <b>RHBDL1</b>     | -0.50 | 2.68E-01 | 1.00E+00 | 0.14  | 8.03E-01 | 9.75E-01 |
| <b>FAM27E3</b>    | -0.61 | 7.71E-01 | 1.00E+00 | 0.30  | 8.03E-01 | 9.75E-01 |
| <b>AL024507.2</b> | -0.05 | 9.53E-01 | 1.00E+00 | 0.23  | 8.03E-01 | 9.75E-01 |
| <b>CLEC18B</b>    | -0.65 | 6.29E-01 | 1.00E+00 | 0.39  | 8.03E-01 | 9.75E-01 |
| <b>LINC01794</b>  | -0.19 | 9.04E-01 | 1.00E+00 | 0.31  | 8.03E-01 | 9.75E-01 |
| <b>HAP1</b>       | -1.11 | 1.15E-01 | 1.00E+00 | 0.29  | 8.03E-01 | 9.75E-01 |
| <b>MPV17L2</b>    | -0.30 | 1.80E-01 | 1.00E+00 | -0.05 | 8.03E-01 | 9.75E-01 |
| <b>AC104447.1</b> | -0.61 | 3.27E-01 | 1.00E+00 | 0.23  | 8.03E-01 | 9.75E-01 |
| <b>LSP1</b>       | -0.37 | 2.11E-01 | 1.00E+00 | 0.08  | 8.03E-01 | 9.75E-01 |
| <b>NUAK2</b>      | -1.20 | 1.42E-01 | 1.00E+00 | -0.13 | 8.03E-01 | 9.75E-01 |
| <b>PSAPL1</b>     | 0.01  | 9.90E-01 | 1.00E+00 | -0.19 | 8.03E-01 | 9.75E-01 |
| <b>CEP128</b>     | -0.40 | 1.49E-01 | 1.00E+00 | -0.11 | 8.03E-01 | 9.75E-01 |
| <b>BX323845.3</b> | NA    | NA       | NA       | -0.21 | 8.03E-01 | 9.75E-01 |
| <b>FBXO24</b>     | 1.14  | 5.45E-01 | 1.00E+00 | 0.25  | 8.03E-01 | 9.75E-01 |
| <b>SPDYE16</b>    | 0.23  | 8.90E-01 | 1.00E+00 | 0.22  | 8.03E-01 | 9.75E-01 |
| <b>FAM76B</b>     | 0.01  | 9.73E-01 | 1.00E+00 | -0.06 | 8.03E-01 | 9.75E-01 |

|                   |       |          |          |       |          |          |
|-------------------|-------|----------|----------|-------|----------|----------|
| <b>MAGOH3P</b>    | NA    | NA       | NA       | -0.19 | 8.03E-01 | 9.75E-01 |
| <b>LINC00857</b>  | 0.23  | 8.08E-01 | 1.00E+00 | -0.26 | 8.03E-01 | 9.75E-01 |
| <b>MLANA</b>      | 0.27  | 5.34E-01 | 1.00E+00 | 0.20  | 8.03E-01 | 9.75E-01 |
| <b>AC009948.4</b> | -3.15 | 2.81E-01 | 1.00E+00 | 0.18  | 8.03E-01 | 9.75E-01 |
| <b>CDCA2</b>      | -0.19 | 6.08E-01 | 1.00E+00 | 0.16  | 8.03E-01 | 9.75E-01 |
| <b>TPRG1</b>      | 0.30  | 4.38E-01 | 1.00E+00 | -0.11 | 8.04E-01 | 9.75E-01 |
| <b>PCAT19</b>     | 0.13  | 8.10E-01 | 1.00E+00 | -0.13 | 8.04E-01 | 9.75E-01 |
| <b>TUT1</b>       | 0.36  | 2.85E-01 | 1.00E+00 | 0.09  | 8.04E-01 | 9.75E-01 |
| <b>G1997</b>      | -2.00 | 7.78E-02 | 1.00E+00 | 0.29  | 8.04E-01 | 9.75E-01 |
| <b>PFKFB2</b>     | 0.04  | 9.07E-01 | 1.00E+00 | 0.07  | 8.04E-01 | 9.75E-01 |
| <b>JAGN1</b>      | 0.10  | 5.25E-01 | 1.00E+00 | -0.06 | 8.04E-01 | 9.75E-01 |
| <b>SLC45A1</b>    | -0.52 | 2.48E-01 | 1.00E+00 | 0.18  | 8.04E-01 | 9.75E-01 |
| <b>AL731571.1</b> | -0.09 | 8.86E-01 | 1.00E+00 | 0.15  | 8.04E-01 | 9.75E-01 |
| <b>HCN2</b>       | -1.05 | 5.90E-03 | 4.57E-01 | 0.74  | 8.04E-01 | 9.75E-01 |
| <b>AC000089.1</b> | 0.16  | 8.85E-01 | 1.00E+00 | 0.21  | 8.04E-01 | 9.75E-01 |
| <b>DCSTAMP</b>    | -0.86 | 8.05E-01 | 1.00E+00 | 0.79  | 8.04E-01 | 9.75E-01 |
| <b>UBE2S</b>      | -0.20 | 4.66E-01 | 1.00E+00 | 0.23  | 8.04E-01 | 9.75E-01 |
| <b>TMC2</b>       | 1.40  | 2.34E-01 | 1.00E+00 | 0.31  | 8.04E-01 | 9.75E-01 |
| <b>AL353791.1</b> | 1.49  | 7.33E-02 | 1.00E+00 | -0.18 | 8.04E-01 | 9.75E-01 |
| <b>ITPRIPL2</b>   | 0.13  | 6.25E-01 | 1.00E+00 | -0.11 | 8.04E-01 | 9.75E-01 |
| <b>AC007066.2</b> | 0.24  | 6.79E-01 | 1.00E+00 | 0.28  | 8.04E-01 | 9.75E-01 |
| <b>HELLS</b>      | 0.15  | 5.74E-01 | 1.00E+00 | -0.13 | 8.04E-01 | 9.75E-01 |
| <b>SPERT</b>      | -2.84 | 2.63E-02 | 9.46E-01 | 0.31  | 8.04E-01 | 9.75E-01 |
| <b>PROSER2</b>    | -0.09 | 7.53E-01 | 1.00E+00 | -0.18 | 8.04E-01 | 9.75E-01 |
| <b>TOLLIP</b>     | -0.12 | 6.63E-01 | 1.00E+00 | 0.04  | 8.04E-01 | 9.75E-01 |
| <b>SH2D7</b>      | -1.23 | 4.35E-01 | 1.00E+00 | 0.33  | 8.04E-01 | 9.75E-01 |
| <b>TBCD</b>       | -0.12 | 5.49E-01 | 1.00E+00 | 0.09  | 8.04E-01 | 9.75E-01 |
| <b>SHBG</b>       | -0.65 | 6.42E-01 | 1.00E+00 | -0.27 | 8.04E-01 | 9.75E-01 |
| <b>AL022718.1</b> | NA    | NA       | NA       | 0.19  | 8.04E-01 | 9.75E-01 |
| <b>UPF1</b>       | 0.01  | 9.46E-01 | 1.00E+00 | 0.17  | 8.04E-01 | 9.75E-01 |
| <b>SLC25A35</b>   | -0.26 | 5.69E-01 | 1.00E+00 | 0.12  | 8.04E-01 | 9.75E-01 |
| <b>MFSD2A</b>     | -0.23 | 6.86E-01 | 1.00E+00 | -0.16 | 8.04E-01 | 9.75E-01 |

|                   |       |          |          |       |          |          |
|-------------------|-------|----------|----------|-------|----------|----------|
| <b>AL445228.2</b> | -2.36 | 1.33E-01 | 1.00E+00 | -0.24 | 8.04E-01 | 9.75E-01 |
| <b>AC005632.2</b> | -0.80 | 7.51E-01 | 1.00E+00 | 0.26  | 8.05E-01 | 9.75E-01 |
| <b>CIAO2A</b>     | 0.24  | 3.58E-01 | 1.00E+00 | -0.08 | 8.05E-01 | 9.75E-01 |
| <b>EMILIN1</b>    | 0.01  | 9.77E-01 | 1.00E+00 | 0.77  | 8.05E-01 | 9.75E-01 |
| <b>SPTSSB</b>     | 0.23  | 5.73E-01 | 1.00E+00 | -0.16 | 8.05E-01 | 9.75E-01 |
| <b>SLC4A1APP1</b> | -0.16 | 9.39E-01 | 1.00E+00 | -0.16 | 8.05E-01 | 9.75E-01 |
| <b>HMG20A</b>     | 0.04  | 8.13E-01 | 1.00E+00 | 0.05  | 8.05E-01 | 9.75E-01 |
| <b>ARHGEF38</b>   | -0.69 | 4.79E-01 | 1.00E+00 | 0.17  | 8.05E-01 | 9.75E-01 |
| <b>DHX36</b>      | 0.18  | 2.59E-01 | 1.00E+00 | -0.08 | 8.05E-01 | 9.75E-01 |
| <b>KIF12</b>      | -0.58 | 4.19E-01 | 1.00E+00 | -0.18 | 8.05E-01 | 9.75E-01 |
| <b>POC1A</b>      | -0.06 | 8.00E-01 | 1.00E+00 | 0.09  | 8.05E-01 | 9.75E-01 |
| <b>HOOK1</b>      | 0.17  | 6.64E-01 | 1.00E+00 | -0.12 | 8.05E-01 | 9.75E-01 |
| <b>EIF4A1P7</b>   | 0.25  | 9.42E-01 | 1.00E+00 | 0.22  | 8.05E-01 | 9.75E-01 |
| <b>AC233723.2</b> | -0.44 | 2.30E-01 | 1.00E+00 | -0.14 | 8.05E-01 | 9.75E-01 |
| <b>RPL34</b>      | -0.01 | 9.62E-01 | 1.00E+00 | 0.11  | 8.05E-01 | 9.75E-01 |
| <b>UBAP1L</b>     | 0.28  | 7.20E-01 | 1.00E+00 | -0.26 | 8.05E-01 | 9.75E-01 |
| <b>GNA14</b>      | 0.13  | 7.28E-01 | 1.00E+00 | -0.13 | 8.05E-01 | 9.75E-01 |
| <b>BX322639.1</b> | -1.00 | 2.11E-01 | 1.00E+00 | 0.18  | 8.05E-01 | 9.75E-01 |
| <b>MAST4</b>      | -0.02 | 9.39E-01 | 1.00E+00 | 0.08  | 8.05E-01 | 9.75E-01 |
| <b>AC008897.2</b> | -3.53 | 8.92E-02 | 1.00E+00 | 0.27  | 8.05E-01 | 9.75E-01 |
| <b>AC093159.1</b> | -2.44 | 8.84E-02 | 1.00E+00 | 0.28  | 8.05E-01 | 9.75E-01 |
| <b>ABCA12</b>     | 0.05  | 9.27E-01 | 1.00E+00 | 0.18  | 8.06E-01 | 9.75E-01 |
| <b>LARP6</b>      | 0.47  | 3.22E-01 | 1.00E+00 | -0.16 | 8.06E-01 | 9.75E-01 |
| <b>CD3EAP</b>     | -0.22 | 5.29E-01 | 1.00E+00 | -0.08 | 8.06E-01 | 9.75E-01 |
| <b>HNRNPA1P4</b>  | 1.22  | 2.30E-01 | 1.00E+00 | -0.10 | 8.06E-01 | 9.75E-01 |
| <b>CHRD1</b>      | 1.57  | 3.24E-02 | 1.00E+00 | 0.17  | 8.06E-01 | 9.75E-01 |
| <b>AL645568.1</b> | -0.16 | 7.99E-01 | 1.00E+00 | 0.14  | 8.06E-01 | 9.75E-01 |
| <b>KRTAP9-9</b>   | -6.43 | 6.45E-02 | 1.00E+00 | -0.79 | 8.06E-01 | 9.75E-01 |
| <b>MYCN</b>       | -0.59 | 4.23E-01 | 1.00E+00 | -0.21 | 8.06E-01 | 9.75E-01 |
| <b>G3878</b>      | 0.28  | 8.43E-01 | 1.00E+00 | 0.48  | 8.06E-01 | 9.75E-01 |
| <b>ABI1</b>       | -0.04 | 8.81E-01 | 1.00E+00 | -0.06 | 8.06E-01 | 9.75E-01 |
| <b>LINC02068</b>  | -0.62 | 6.94E-01 | 1.00E+00 | 0.25  | 8.06E-01 | 9.75E-01 |

|                    |       |          |          |       |          |          |
|--------------------|-------|----------|----------|-------|----------|----------|
| <b>AC138028.2</b>  | -0.52 | 5.77E-01 | 1.00E+00 | -0.36 | 8.06E-01 | 9.75E-01 |
| <b>KIR3DL2</b>     | -0.29 | 8.97E-01 | 1.00E+00 | 0.38  | 8.06E-01 | 9.75E-01 |
| <b>AL356423.1</b>  | NA    | NA       | NA       | 0.37  | 8.06E-01 | 9.75E-01 |
| <b>PGK1</b>        | 0.00  | 9.80E-01 | 1.00E+00 | 0.04  | 8.06E-01 | 9.75E-01 |
| <b>AC099522.1</b>  | 0.56  | 8.71E-01 | 1.00E+00 | -0.20 | 8.06E-01 | 9.75E-01 |
| <b>MYO19</b>       | -0.06 | 7.28E-01 | 1.00E+00 | 0.08  | 8.06E-01 | 9.75E-01 |
| <b>AC010491.1</b>  | -0.21 | 7.78E-01 | 1.00E+00 | -0.21 | 8.06E-01 | 9.75E-01 |
| <b>PNMA1</b>       | 0.12  | 7.40E-01 | 1.00E+00 | 0.11  | 8.06E-01 | 9.75E-01 |
| <b>ZMYM4-AS1</b>   | NA    | NA       | NA       | -0.32 | 8.06E-01 | 9.75E-01 |
| <b>CCDC163</b>     | -0.10 | 8.71E-01 | 1.00E+00 | -0.14 | 8.06E-01 | 9.75E-01 |
| <b>AC022509.2</b>  | 0.61  | 4.28E-01 | 1.00E+00 | -0.14 | 8.06E-01 | 9.75E-01 |
| <b>ZC3H12B</b>     | -0.28 | 6.79E-01 | 1.00E+00 | 0.16  | 8.06E-01 | 9.75E-01 |
| <b>YES1</b>        | -0.04 | 8.58E-01 | 1.00E+00 | -0.05 | 8.06E-01 | 9.75E-01 |
| <b>GPR180</b>      | 0.12  | 7.42E-01 | 1.00E+00 | -0.09 | 8.06E-01 | 9.75E-01 |
| <b>RPLP2</b>       | -0.10 | 6.66E-01 | 1.00E+00 | 0.05  | 8.06E-01 | 9.75E-01 |
| <b>LINC01638</b>   | 4.65  | 1.37E-01 | 1.00E+00 | -0.30 | 8.07E-01 | 9.75E-01 |
| <b>CLUAP1</b>      | 0.14  | 5.34E-01 | 1.00E+00 | -0.06 | 8.07E-01 | 9.75E-01 |
| <b>GGN</b>         | 0.03  | 9.64E-01 | 1.00E+00 | 0.26  | 8.07E-01 | 9.75E-01 |
| <b>FBXL19-AS1</b>  | 0.63  | 1.66E-01 | 1.00E+00 | 0.19  | 8.07E-01 | 9.75E-01 |
| <b>ALKBH1</b>      | -0.02 | 9.21E-01 | 1.00E+00 | 0.06  | 8.07E-01 | 9.75E-01 |
| <b>ATP6V0A2</b>    | 0.26  | 4.72E-01 | 1.00E+00 | -0.10 | 8.07E-01 | 9.75E-01 |
| <b>WDR3</b>        | -0.05 | 8.48E-01 | 1.00E+00 | 0.08  | 8.07E-01 | 9.75E-01 |
| <b>XLOC_001527</b> | -1.06 | 1.97E-01 | 1.00E+00 | -0.29 | 8.07E-01 | 9.75E-01 |
| <b>FKBP5</b>       | 0.22  | 6.98E-01 | 1.00E+00 | -0.11 | 8.07E-01 | 9.75E-01 |
| <b>DCPS</b>        | -0.23 | 2.53E-01 | 1.00E+00 | -0.05 | 8.07E-01 | 9.75E-01 |
| <b>SMAD6</b>       | 0.78  | 6.08E-02 | 1.00E+00 | -0.77 | 8.07E-01 | 9.75E-01 |
| <b>XLOC_009920</b> | 0.14  | 9.67E-01 | 1.00E+00 | 0.35  | 8.07E-01 | 9.75E-01 |
| <b>JPH1</b>        | -0.13 | 7.66E-01 | 1.00E+00 | -0.17 | 8.07E-01 | 9.75E-01 |
| <b>AP4M1</b>       | 0.16  | 5.20E-01 | 1.00E+00 | -0.05 | 8.07E-01 | 9.75E-01 |
| <b>GORASP1</b>     | 0.12  | 5.47E-01 | 1.00E+00 | -0.04 | 8.07E-01 | 9.75E-01 |
| <b>IFI27L2</b>     | -0.16 | 6.45E-01 | 1.00E+00 | 0.07  | 8.07E-01 | 9.75E-01 |
| <b>PIK3R4</b>      | -0.07 | 7.40E-01 | 1.00E+00 | -0.06 | 8.07E-01 | 9.75E-01 |

|                   |        |          |          |       |          |          |
|-------------------|--------|----------|----------|-------|----------|----------|
| <b>SLC16A2</b>    | 0.11   | 8.01E-01 | 1.00E+00 | 0.14  | 8.07E-01 | 9.75E-01 |
| <b>AP000692.1</b> | 1.98   | 1.80E-01 | 1.00E+00 | 0.25  | 8.07E-01 | 9.75E-01 |
| <b>KCNK9</b>      | -1.95  | 2.38E-01 | 1.00E+00 | 0.40  | 8.07E-01 | 9.75E-01 |
| <b>NDE1</b>       | -0.31  | 2.40E-01 | 1.00E+00 | -0.09 | 8.07E-01 | 9.75E-01 |
| <b>AC093890.1</b> | 1.05   | 1.02E-01 | 1.00E+00 | -0.23 | 8.07E-01 | 9.75E-01 |
| <b>AC138305.3</b> | -0.49  | 8.39E-01 | 1.00E+00 | -0.18 | 8.07E-01 | 9.75E-01 |
| <b>MYORG</b>      | 0.15   | 6.41E-01 | 1.00E+00 | 0.12  | 8.08E-01 | 9.75E-01 |
| <b>DROSHA</b>     | 0.24   | 2.30E-01 | 1.00E+00 | 0.06  | 8.08E-01 | 9.75E-01 |
| <b>FAM126A</b>    | 0.03   | 9.19E-01 | 1.00E+00 | -0.08 | 8.08E-01 | 9.75E-01 |
| <b>OSER1</b>      | 0.12   | 5.45E-01 | 1.00E+00 | -0.07 | 8.08E-01 | 9.75E-01 |
| <b>KRT33B</b>     | -17.78 | 6.49E-08 | 2.73E-05 | 0.77  | 8.08E-01 | 9.75E-01 |
| <b>MYCBP2-AS1</b> | -2.15  | 4.21E-01 | 1.00E+00 | -0.18 | 8.08E-01 | 9.75E-01 |
| <b>PRSS16</b>     | -0.12  | 7.19E-01 | 1.00E+00 | -0.14 | 8.08E-01 | 9.75E-01 |
| <b>TSPAN1</b>     | 0.08   | 8.58E-01 | 1.00E+00 | 0.10  | 8.08E-01 | 9.75E-01 |
| <b>PHACTR2</b>    | 0.11   | 7.29E-01 | 1.00E+00 | 0.06  | 8.08E-01 | 9.75E-01 |
| <b>CPB2-AS1</b>   | 0.47   | 6.24E-01 | 1.00E+00 | 0.20  | 8.08E-01 | 9.75E-01 |
| <b>AC005865.2</b> | -1.02  | 4.83E-01 | 1.00E+00 | 0.21  | 8.08E-01 | 9.75E-01 |
| <b>PRXL2C</b>     | 0.01   | 9.81E-01 | 1.00E+00 | 0.07  | 8.08E-01 | 9.75E-01 |
| <b>KIAA0753</b>   | 0.00   | 9.88E-01 | 1.00E+00 | -0.15 | 8.08E-01 | 9.75E-01 |
| <b>RAP1GAP</b>    | -0.55  | 3.10E-01 | 1.00E+00 | -0.17 | 8.08E-01 | 9.75E-01 |
| <b>AC048380.2</b> | 3.26   | 1.85E-01 | 1.00E+00 | -0.35 | 8.08E-01 | 9.75E-01 |
| <b>TMEM9</b>      | 0.15   | 5.13E-01 | 1.00E+00 | 0.05  | 8.09E-01 | 9.76E-01 |
| <b>AC106865.1</b> | 0.04   | 9.77E-01 | 1.00E+00 | 0.77  | 8.09E-01 | 9.76E-01 |
| <b>OGT</b>        | 0.06   | 9.02E-01 | 1.00E+00 | -0.07 | 8.09E-01 | 9.76E-01 |
| <b>NBPF2P</b>     | -0.28  | 7.30E-01 | 1.00E+00 | -0.12 | 8.09E-01 | 9.76E-01 |
| <b>WDR75</b>      | 0.14   | 6.13E-01 | 1.00E+00 | 0.06  | 8.09E-01 | 9.76E-01 |
| <b>AP000880.1</b> | -2.33  | 2.13E-01 | 1.00E+00 | -0.25 | 8.09E-01 | 9.76E-01 |
| <b>WVOX</b>       | 0.16   | 4.60E-01 | 1.00E+00 | 0.05  | 8.09E-01 | 9.76E-01 |
| <b>PHKG1</b>      | -0.18  | 6.99E-01 | 1.00E+00 | 0.13  | 8.09E-01 | 9.76E-01 |
| <b>EXOC6B</b>     | -0.06  | 8.44E-01 | 1.00E+00 | -0.07 | 8.09E-01 | 9.76E-01 |
| <b>RMC1</b>       | 0.13   | 5.38E-01 | 1.00E+00 | -0.05 | 8.09E-01 | 9.76E-01 |
| <b>TMEM208</b>    | 0.14   | 4.49E-01 | 1.00E+00 | 0.05  | 8.09E-01 | 9.76E-01 |



|             |       |          |          |       |          |          |
|-------------|-------|----------|----------|-------|----------|----------|
| ALS2        | -0.01 | 9.75E-01 | 1.00E+00 | 0.05  | 8.09E-01 | 9.76E-01 |
| ZNF18       | -0.15 | 5.28E-01 | 1.00E+00 | -0.05 | 8.09E-01 | 9.76E-01 |
| RPS3AP6     | -0.22 | 5.73E-01 | 1.00E+00 | -0.13 | 8.09E-01 | 9.76E-01 |
| AP1M1       | 0.05  | 8.40E-01 | 1.00E+00 | -0.05 | 8.09E-01 | 9.76E-01 |
| LRP8        | -0.99 | 2.15E-03 | 2.39E-01 | -0.19 | 8.09E-01 | 9.76E-01 |
| AC146944.2  | -1.63 | 3.96E-01 | 1.00E+00 | 0.30  | 8.09E-01 | 9.76E-01 |
| TMEM223     | 0.04  | 8.61E-01 | 1.00E+00 | -0.07 | 8.09E-01 | 9.76E-01 |
| AP002383.3  | -0.74 | 7.30E-01 | 1.00E+00 | -0.26 | 8.09E-01 | 9.76E-01 |
| XLOC_011210 | -1.06 | 7.00E-01 | 1.00E+00 | -0.41 | 8.09E-01 | 9.76E-01 |
| LINC00323   | 0.49  | 6.60E-01 | 1.00E+00 | 0.23  | 8.09E-01 | 9.76E-01 |
| KIN         | 0.28  | 4.21E-01 | 1.00E+00 | 0.05  | 8.10E-01 | 9.76E-01 |
| C2CD2       | 0.61  | 2.17E-02 | 8.94E-01 | 0.08  | 8.10E-01 | 9.76E-01 |
| LPCAT4      | 0.18  | 5.03E-01 | 1.00E+00 | 0.09  | 8.10E-01 | 9.76E-01 |
| ZNF362      | -0.40 | 1.47E-01 | 1.00E+00 | -0.18 | 8.10E-01 | 9.76E-01 |
| DSTYK       | 0.28  | 2.66E-01 | 1.00E+00 | 0.07  | 8.10E-01 | 9.76E-01 |
| SUSD2       | -0.16 | 7.17E-01 | 1.00E+00 | 0.10  | 8.10E-01 | 9.76E-01 |
| TBC1D30     | 0.18  | 7.84E-01 | 1.00E+00 | 0.20  | 8.10E-01 | 9.76E-01 |
| PCDHGB1     | -0.67 | 3.30E-01 | 1.00E+00 | 0.28  | 8.10E-01 | 9.76E-01 |
| SNORA40     | 0.54  | 6.35E-01 | 1.00E+00 | -0.20 | 8.10E-01 | 9.76E-01 |
| AC011978.2  | 0.74  | 4.01E-01 | 1.00E+00 | -0.15 | 8.10E-01 | 9.76E-01 |
| AC008669.1  | -0.25 | 5.90E-01 | 1.00E+00 | -0.14 | 8.10E-01 | 9.76E-01 |
| LGALS17A    | -2.45 | 2.90E-01 | 1.00E+00 | 0.76  | 8.10E-01 | 9.76E-01 |
| XLOC_013174 | 0.29  | 6.82E-01 | 1.00E+00 | -0.17 | 8.10E-01 | 9.76E-01 |
| ZNF121      | 0.10  | 8.02E-01 | 1.00E+00 | -0.06 | 8.10E-01 | 9.76E-01 |
| SPRED2      | 0.15  | 6.02E-01 | 1.00E+00 | 0.09  | 8.10E-01 | 9.76E-01 |
| AL355102.4  | 0.56  | 8.71E-01 | 1.00E+00 | 0.34  | 8.10E-01 | 9.76E-01 |
| SPIRE2      | -0.04 | 9.45E-01 | 1.00E+00 | -0.19 | 8.10E-01 | 9.76E-01 |
| HAO2        | 0.96  | 6.15E-01 | 1.00E+00 | -0.75 | 8.10E-01 | 9.76E-01 |
| AC040174.2  | -2.18 | 4.21E-01 | 1.00E+00 | -0.29 | 8.11E-01 | 9.76E-01 |
| AC044810.2  | 0.26  | 7.85E-01 | 1.00E+00 | -0.17 | 8.11E-01 | 9.76E-01 |
| SBF2        | 0.22  | 2.85E-01 | 1.00E+00 | -0.10 | 8.11E-01 | 9.76E-01 |
| DOCK6       | 0.05  | 8.60E-01 | 1.00E+00 | 0.12  | 8.11E-01 | 9.76E-01 |

|                    |       |          |          |       |          |          |
|--------------------|-------|----------|----------|-------|----------|----------|
| <b>AC090204.1</b>  | -0.15 | 8.88E-01 | 1.00E+00 | 0.18  | 8.11E-01 | 9.76E-01 |
| <b>POLR3E</b>      | -0.22 | 4.15E-01 | 1.00E+00 | 0.06  | 8.11E-01 | 9.76E-01 |
| <b>VPS13D</b>      | 0.02  | 9.53E-01 | 1.00E+00 | 0.08  | 8.11E-01 | 9.76E-01 |
| <b>AL512770.1</b>  | -1.71 | 4.97E-01 | 1.00E+00 | -0.25 | 8.11E-01 | 9.76E-01 |
| <b>POLR2E</b>      | -0.11 | 6.50E-01 | 1.00E+00 | -0.05 | 8.11E-01 | 9.76E-01 |
| <b>AC104118.1</b>  | -0.71 | 6.76E-01 | 1.00E+00 | 0.76  | 8.11E-01 | 9.76E-01 |
| <b>SPATA2</b>      | -0.35 | 3.78E-02 | 1.00E+00 | -0.08 | 8.11E-01 | 9.76E-01 |
| <b>AC079922.1</b>  | -1.28 | 4.96E-01 | 1.00E+00 | 0.24  | 8.11E-01 | 9.76E-01 |
| <b>NIPBL</b>       | -0.11 | 5.88E-01 | 1.00E+00 | 0.06  | 8.11E-01 | 9.76E-01 |
| <b>SFXN1</b>       | -0.21 | 3.79E-01 | 1.00E+00 | 0.05  | 8.11E-01 | 9.76E-01 |
| <b>ZBTB12</b>      | -0.61 | 8.84E-02 | 1.00E+00 | 0.76  | 8.11E-01 | 9.76E-01 |
| <b>CAPN2</b>       | 0.00  | 9.94E-01 | 1.00E+00 | 0.10  | 8.11E-01 | 9.76E-01 |
| <b>EEF1B2P6</b>    | -0.81 | 3.08E-01 | 1.00E+00 | 0.15  | 8.11E-01 | 9.76E-01 |
| <b>RAE1</b>        | 0.23  | 3.45E-01 | 1.00E+00 | -0.07 | 8.11E-01 | 9.76E-01 |
| <b>AC093278.2</b>  | 0.06  | 9.23E-01 | 1.00E+00 | 0.19  | 8.11E-01 | 9.76E-01 |
| <b>MCOLN3</b>      | 0.53  | 1.90E-01 | 1.00E+00 | 0.12  | 8.11E-01 | 9.76E-01 |
| <b>AC069549.1</b>  | -0.97 | 7.73E-01 | 1.00E+00 | 0.22  | 8.11E-01 | 9.76E-01 |
| <b>KLF2</b>        | -0.76 | 2.90E-02 | 9.88E-01 | 0.18  | 8.11E-01 | 9.76E-01 |
| <b>ATOX1</b>       | -0.01 | 9.84E-01 | 1.00E+00 | 0.05  | 8.11E-01 | 9.76E-01 |
| <b>Z83851.1</b>    | 0.22  | 7.39E-01 | 1.00E+00 | -0.20 | 8.11E-01 | 9.76E-01 |
| <b>STAC2</b>       | 0.23  | 8.36E-01 | 1.00E+00 | -0.17 | 8.11E-01 | 9.76E-01 |
| <b>XLOC_006072</b> | -0.27 | 8.25E-01 | 1.00E+00 | 0.31  | 8.11E-01 | 9.76E-01 |
| <b>TM9SF2</b>      | 0.15  | 3.19E-01 | 1.00E+00 | -0.05 | 8.11E-01 | 9.76E-01 |
| <b>LIPA</b>        | 0.23  | 4.27E-01 | 1.00E+00 | -0.12 | 8.11E-01 | 9.76E-01 |
| <b>PACRG</b>       | 0.04  | 9.07E-01 | 1.00E+00 | -0.12 | 8.12E-01 | 9.76E-01 |
| <b>TCF15</b>       | 0.13  | 8.98E-01 | 1.00E+00 | -0.27 | 8.12E-01 | 9.76E-01 |
| <b>ANOS1</b>       | -0.67 | 6.09E-02 | 1.00E+00 | -0.11 | 8.12E-01 | 9.76E-01 |
| <b>FIRRE</b>       | -1.19 | 6.76E-01 | 1.00E+00 | -0.31 | 8.12E-01 | 9.76E-01 |
| <b>AC004706.1</b>  | -0.87 | 3.09E-01 | 1.00E+00 | -0.19 | 8.12E-01 | 9.76E-01 |
| <b>CA13</b>        | 0.26  | 4.16E-01 | 1.00E+00 | -0.10 | 8.12E-01 | 9.76E-01 |
| <b>AC008592.5</b>  | -0.45 | 4.20E-01 | 1.00E+00 | -0.15 | 8.12E-01 | 9.76E-01 |
| <b>IDH3B</b>       | -0.15 | 4.33E-01 | 1.00E+00 | -0.03 | 8.12E-01 | 9.76E-01 |

|             |       |          |          |       |          |          |
|-------------|-------|----------|----------|-------|----------|----------|
| CDC25A      | -0.31 | 4.04E-01 | 1.00E+00 | 0.21  | 8.12E-01 | 9.76E-01 |
| HES4        | -0.69 | 9.11E-03 | 5.95E-01 | -0.74 | 8.12E-01 | 9.76E-01 |
| CRSP8P      | 0.48  | 8.88E-01 | 1.00E+00 | -0.14 | 8.12E-01 | 9.76E-01 |
| XLOC_009026 | -1.28 | 5.08E-01 | 1.00E+00 | -0.74 | 8.12E-01 | 9.76E-01 |
| HNMT        | 0.47  | 2.67E-01 | 1.00E+00 | -0.10 | 8.12E-01 | 9.76E-01 |
| AC096992.2  | -0.20 | 7.64E-01 | 1.00E+00 | 0.18  | 8.12E-01 | 9.76E-01 |
| LTK         | -0.43 | 4.76E-01 | 1.00E+00 | 0.27  | 8.12E-01 | 9.76E-01 |
| TULP1       | 0.11  | 9.04E-01 | 1.00E+00 | 0.15  | 8.12E-01 | 9.76E-01 |
| RASL11B     | 0.32  | 5.11E-01 | 1.00E+00 | -0.15 | 8.12E-01 | 9.76E-01 |
| CCNT2       | 0.07  | 7.98E-01 | 1.00E+00 | -0.06 | 8.12E-01 | 9.76E-01 |
| BDH1        | -0.49 | 1.82E-01 | 1.00E+00 | 0.08  | 8.13E-01 | 9.76E-01 |
| AC005537.1  | -0.74 | 3.48E-01 | 1.00E+00 | 0.18  | 8.13E-01 | 9.76E-01 |
| TMEM179     | -4.66 | 9.22E-05 | 2.32E-02 | 0.42  | 8.13E-01 | 9.76E-01 |
| DNAJC24     | 0.02  | 9.58E-01 | 1.00E+00 | -0.04 | 8.13E-01 | 9.76E-01 |
| DCTN1       | -0.15 | 5.03E-01 | 1.00E+00 | 0.10  | 8.13E-01 | 9.76E-01 |
| AL359643.2  | 0.74  | 2.81E-01 | 1.00E+00 | -0.22 | 8.13E-01 | 9.76E-01 |
| B3GNT4      | 0.14  | 7.37E-01 | 1.00E+00 | -0.14 | 8.13E-01 | 9.76E-01 |
| ENPP2       | 0.49  | 1.59E-01 | 1.00E+00 | -0.12 | 8.13E-01 | 9.76E-01 |
| CXCL17      | -0.04 | 9.68E-01 | 1.00E+00 | -0.64 | 8.13E-01 | 9.76E-01 |
| SURF2       | -0.10 | 6.98E-01 | 1.00E+00 | -0.07 | 8.13E-01 | 9.76E-01 |
| AC005829.1  | -0.62 | 4.90E-01 | 1.00E+00 | 0.16  | 8.13E-01 | 9.76E-01 |
| BORCS6      | -0.14 | 5.61E-01 | 1.00E+00 | -0.05 | 8.13E-01 | 9.76E-01 |
| AC116533.1  | -0.22 | 5.69E-01 | 1.00E+00 | -0.11 | 8.13E-01 | 9.76E-01 |
| SNHG3       | -0.32 | 3.44E-01 | 1.00E+00 | -0.09 | 8.13E-01 | 9.76E-01 |
| XLOC_011052 | -2.22 | 5.19E-01 | 1.00E+00 | -0.35 | 8.13E-01 | 9.76E-01 |
| PRICKLE2    | -0.14 | 7.76E-01 | 1.00E+00 | -0.06 | 8.13E-01 | 9.76E-01 |
| LRIG1       | 0.11  | 7.65E-01 | 1.00E+00 | -0.12 | 8.13E-01 | 9.76E-01 |
| OTUD3       | 0.12  | 7.38E-01 | 1.00E+00 | -0.10 | 8.13E-01 | 9.76E-01 |
| UQCRH       | 0.04  | 8.56E-01 | 1.00E+00 | -0.04 | 8.13E-01 | 9.76E-01 |
| VASH2       | -0.13 | 8.44E-01 | 1.00E+00 | 0.15  | 8.13E-01 | 9.76E-01 |
| MIR100HG    | 0.68  | 1.12E-01 | 1.00E+00 | 0.09  | 8.13E-01 | 9.76E-01 |
| AL049872.1  | -0.96 | 7.80E-01 | 1.00E+00 | -0.16 | 8.14E-01 | 9.76E-01 |

|                   |       |          |          |       |          |          |
|-------------------|-------|----------|----------|-------|----------|----------|
| <b>AL121655.1</b> | -1.03 | 6.75E-01 | 1.00E+00 | 0.19  | 8.14E-01 | 9.76E-01 |
| <b>RNF150</b>     | 0.70  | 2.65E-01 | 1.00E+00 | 0.14  | 8.14E-01 | 9.76E-01 |
| <b>NAP1L5</b>     | 0.04  | 9.24E-01 | 1.00E+00 | -0.10 | 8.14E-01 | 9.76E-01 |
| <b>CLTCL1</b>     | 0.27  | 4.01E-01 | 1.00E+00 | 0.13  | 8.14E-01 | 9.76E-01 |
| <b>PRKG2</b>      | 0.81  | 2.35E-01 | 1.00E+00 | 0.14  | 8.14E-01 | 9.76E-01 |
| <b>COL4A2-AS2</b> | NA    | NA       | NA       | 0.76  | 8.14E-01 | 9.76E-01 |
| <b>RARB</b>       | -0.22 | 7.10E-01 | 1.00E+00 | -0.14 | 8.14E-01 | 9.76E-01 |
| <b>EBF2</b>       | 0.71  | 2.80E-01 | 1.00E+00 | 0.14  | 8.14E-01 | 9.76E-01 |
| <b>OCA2</b>       | 0.05  | 9.11E-01 | 1.00E+00 | 0.13  | 8.14E-01 | 9.76E-01 |
| <b>ZFC3H1</b>     | -0.28 | 3.03E-01 | 1.00E+00 | 0.07  | 8.14E-01 | 9.76E-01 |
| <b>ATF7</b>       | -0.08 | 6.74E-01 | 1.00E+00 | -0.04 | 8.14E-01 | 9.76E-01 |
| <b>TRIM55</b>     | 2.27  | 2.68E-01 | 1.00E+00 | -0.26 | 8.14E-01 | 9.76E-01 |
| <b>GGACT</b>      | -0.21 | 5.23E-01 | 1.00E+00 | 0.08  | 8.14E-01 | 9.76E-01 |
| <b>EHD2</b>       | 0.17  | 6.93E-01 | 1.00E+00 | -0.12 | 8.14E-01 | 9.76E-01 |
| <b>S1PR1</b>      | 0.29  | 5.76E-01 | 1.00E+00 | -0.12 | 8.14E-01 | 9.76E-01 |
| <b>PPOX</b>       | -0.07 | 7.76E-01 | 1.00E+00 | -0.06 | 8.14E-01 | 9.76E-01 |
| <b>CFDP1</b>      | 0.38  | 1.05E-01 | 1.00E+00 | -0.04 | 8.14E-01 | 9.76E-01 |
| <b>ZNF285</b>     | 1.15  | 4.36E-02 | 1.00E+00 | 0.25  | 8.14E-01 | 9.76E-01 |
| <b>NME4</b>       | 0.13  | 7.72E-01 | 1.00E+00 | -0.08 | 8.14E-01 | 9.76E-01 |
| <b>TRMT1L</b>     | 0.58  | 4.96E-02 | 1.00E+00 | 0.06  | 8.14E-01 | 9.76E-01 |
| <b>LY6G6D</b>     | -2.36 | 2.14E-01 | 1.00E+00 | 0.42  | 8.14E-01 | 9.76E-01 |
| <b>TRIM31</b>     | 0.19  | 7.33E-01 | 1.00E+00 | -0.14 | 8.15E-01 | 9.76E-01 |
| <b>SPEG</b>       | -0.43 | 5.18E-01 | 1.00E+00 | -0.19 | 8.15E-01 | 9.76E-01 |
| <b>AL157392.3</b> | 0.34  | 4.40E-01 | 1.00E+00 | -0.10 | 8.15E-01 | 9.76E-01 |
| <b>ASTN1</b>      | -1.38 | 5.22E-02 | 1.00E+00 | -0.28 | 8.15E-01 | 9.76E-01 |
| <b>AL359922.3</b> | 3.04  | 2.19E-02 | 8.96E-01 | -0.19 | 8.15E-01 | 9.76E-01 |
| <b>G36957</b>     | -0.45 | 8.13E-01 | 1.00E+00 | 0.50  | 8.15E-01 | 9.76E-01 |
| <b>KRT23</b>      | 0.18  | 7.32E-01 | 1.00E+00 | 0.13  | 8.15E-01 | 9.76E-01 |
| <b>PXDC1</b>      | 0.44  | 2.18E-01 | 1.00E+00 | -0.12 | 8.15E-01 | 9.76E-01 |
| <b>AL139246.5</b> | 0.06  | 8.64E-01 | 1.00E+00 | 0.24  | 8.15E-01 | 9.76E-01 |
| <b>SEPSECS</b>    | 0.39  | 1.08E-01 | 1.00E+00 | -0.08 | 8.15E-01 | 9.76E-01 |
| <b>MTMR4</b>      | -0.04 | 8.61E-01 | 1.00E+00 | -0.07 | 8.15E-01 | 9.76E-01 |

|             |        |          |          |       |          |          |
|-------------|--------|----------|----------|-------|----------|----------|
| RNF168      | 0.09   | 7.19E-01 | 1.00E+00 | -0.07 | 8.15E-01 | 9.76E-01 |
| XLOC_008190 | -1.07  | 4.79E-01 | 1.00E+00 | -0.27 | 8.15E-01 | 9.76E-01 |
| LRP4        | 0.20   | 5.38E-01 | 1.00E+00 | -0.09 | 8.15E-01 | 9.76E-01 |
| FAM13C      | 0.21   | 5.49E-01 | 1.00E+00 | -0.09 | 8.15E-01 | 9.76E-01 |
| AC022182.3  | -2.19  | 5.21E-01 | 1.00E+00 | 0.19  | 8.15E-01 | 9.76E-01 |
| CLCA4       | 0.19   | 7.52E-01 | 1.00E+00 | -0.17 | 8.15E-01 | 9.76E-01 |
| RBM15B      | -0.27  | 2.56E-01 | 1.00E+00 | 0.10  | 8.15E-01 | 9.76E-01 |
| KRTAP12-2   | -30.00 | 1.37E-18 | 5.54E-15 | -0.75 | 8.15E-01 | 9.76E-01 |
| ZNF214      | 0.87   | 2.19E-01 | 1.00E+00 | 0.15  | 8.15E-01 | 9.76E-01 |
| PIGM        | 0.28   | 3.05E-01 | 1.00E+00 | 0.06  | 8.15E-01 | 9.76E-01 |
| TNFSF11     | -3.81  | 1.46E-02 | 7.60E-01 | -0.74 | 8.15E-01 | 9.76E-01 |
| IFT80       | -0.29  | 4.91E-01 | 1.00E+00 | 0.07  | 8.15E-01 | 9.76E-01 |
| BOC         | -0.25  | 4.89E-01 | 1.00E+00 | -0.09 | 8.15E-01 | 9.76E-01 |
| SHISA8      | -1.64  | 2.89E-02 | 9.88E-01 | 0.33  | 8.15E-01 | 9.76E-01 |
| LINC02301   | -0.37  | 8.20E-01 | 1.00E+00 | -0.28 | 8.15E-01 | 9.76E-01 |
| THBS4       | 1.33   | 2.54E-01 | 1.00E+00 | -0.18 | 8.15E-01 | 9.76E-01 |
| SIRT2       | -0.16  | 4.71E-01 | 1.00E+00 | 0.05  | 8.16E-01 | 9.76E-01 |
| SNRNP200    | -0.15  | 4.98E-01 | 1.00E+00 | 0.09  | 8.16E-01 | 9.76E-01 |
| SETDB2      | 0.03   | 8.82E-01 | 1.00E+00 | 0.06  | 8.16E-01 | 9.77E-01 |
| KMT5C       | -0.43  | 1.40E-01 | 1.00E+00 | 0.18  | 8.16E-01 | 9.77E-01 |
| SOS1-IT1    | 1.38   | 2.84E-01 | 1.00E+00 | -0.58 | 8.16E-01 | 9.77E-01 |
| CXorf36     | 0.14   | 7.98E-01 | 1.00E+00 | 0.16  | 8.16E-01 | 9.77E-01 |
| SETD7       | 0.44   | 9.14E-02 | 1.00E+00 | 0.06  | 8.16E-01 | 9.77E-01 |
| BICDL2      | -0.37  | 4.16E-01 | 1.00E+00 | 0.14  | 8.16E-01 | 9.77E-01 |
| USH1G       | -0.26  | 7.00E-01 | 1.00E+00 | -0.18 | 8.16E-01 | 9.77E-01 |
| SMAD9       | -0.14  | 6.74E-01 | 1.00E+00 | 0.11  | 8.16E-01 | 9.77E-01 |
| MIR205HG    | -0.34  | 2.54E-01 | 1.00E+00 | -0.16 | 8.16E-01 | 9.77E-01 |
| GAPDHS      | -0.27  | 9.03E-01 | 1.00E+00 | -0.20 | 8.16E-01 | 9.77E-01 |
| ATP6V1H     | 0.20   | 2.83E-01 | 1.00E+00 | 0.03  | 8.16E-01 | 9.77E-01 |
| EZH1        | 0.49   | 1.64E-01 | 1.00E+00 | -0.08 | 8.16E-01 | 9.77E-01 |
| AC135050.1  | -0.76  | 2.59E-01 | 1.00E+00 | 0.15  | 8.16E-01 | 9.77E-01 |
| PIGU        | -0.07  | 7.17E-01 | 1.00E+00 | 0.04  | 8.16E-01 | 9.77E-01 |

|            |       |          |          |       |          |          |
|------------|-------|----------|----------|-------|----------|----------|
| LINC00165  | 4.20  | 1.31E-03 | 1.95E-01 | -0.35 | 8.16E-01 | 9.77E-01 |
| AC022400.5 | 2.55  | 6.99E-02 | 1.00E+00 | 0.25  | 8.16E-01 | 9.77E-01 |
| FTH1P10    | 0.09  | 9.64E-01 | 1.00E+00 | -0.19 | 8.16E-01 | 9.77E-01 |
| LINC02172  | 1.62  | 5.51E-01 | 1.00E+00 | -0.26 | 8.16E-01 | 9.77E-01 |
| CRKL       | 0.14  | 5.00E-01 | 1.00E+00 | -0.05 | 8.17E-01 | 9.77E-01 |
| AP001381.1 | 1.08  | 5.09E-01 | 1.00E+00 | 0.31  | 8.17E-01 | 9.77E-01 |
| PWAR5      | 0.18  | 6.68E-01 | 1.00E+00 | -0.17 | 8.17E-01 | 9.77E-01 |
| RPL10AP2   | 0.03  | 9.85E-01 | 1.00E+00 | 0.18  | 8.17E-01 | 9.77E-01 |
| CNGA3      | -2.85 | 1.54E-01 | 1.00E+00 | 0.74  | 8.17E-01 | 9.77E-01 |
| PSMB8-AS1  | 0.19  | 6.05E-01 | 1.00E+00 | -0.08 | 8.17E-01 | 9.77E-01 |
| RPS25      | -0.11 | 7.05E-01 | 1.00E+00 | -0.06 | 8.17E-01 | 9.77E-01 |
| KRTAP5-11  | -6.46 | 6.36E-02 | 1.00E+00 | -0.74 | 8.17E-01 | 9.77E-01 |
| G10021     | 1.06  | 4.03E-01 | 1.00E+00 | 0.18  | 8.17E-01 | 9.77E-01 |
| RBP1       | -0.41 | 2.14E-01 | 1.00E+00 | 0.09  | 8.17E-01 | 9.77E-01 |
| PRX        | -0.14 | 7.39E-01 | 1.00E+00 | 0.72  | 8.17E-01 | 9.77E-01 |
| KDM4D      | 0.19  | 5.70E-01 | 1.00E+00 | -0.13 | 8.17E-01 | 9.77E-01 |
| LINC00886  | 0.31  | 4.96E-01 | 1.00E+00 | 0.12  | 8.17E-01 | 9.77E-01 |
| RRP15      | 0.19  | 3.95E-01 | 1.00E+00 | -0.05 | 8.17E-01 | 9.77E-01 |
| DISP1      | 0.42  | 1.65E-01 | 1.00E+00 | -0.13 | 8.17E-01 | 9.77E-01 |
| AC027288.3 | 1.18  | 2.11E-01 | 1.00E+00 | -0.20 | 8.17E-01 | 9.77E-01 |
| RHOB       | -0.65 | 7.91E-02 | 1.00E+00 | 0.13  | 8.17E-01 | 9.77E-01 |
| TRNT1      | 0.56  | 8.08E-02 | 1.00E+00 | 0.07  | 8.18E-01 | 9.77E-01 |
| ZNF700     | 0.01  | 9.73E-01 | 1.00E+00 | 0.07  | 8.18E-01 | 9.77E-01 |
| AC039056.2 | -2.67 | 7.83E-02 | 1.00E+00 | -0.26 | 8.18E-01 | 9.77E-01 |
| UBE2D4     | 0.17  | 6.34E-01 | 1.00E+00 | -0.09 | 8.18E-01 | 9.77E-01 |
| PTTG1      | -0.02 | 9.63E-01 | 1.00E+00 | 0.11  | 8.18E-01 | 9.77E-01 |
| POU5F1B    | 0.01  | 9.92E-01 | 1.00E+00 | -0.23 | 8.18E-01 | 9.77E-01 |
| SMUG1      | 0.15  | 5.80E-01 | 1.00E+00 | -0.06 | 8.18E-01 | 9.77E-01 |
| G35913     | -1.42 | 2.34E-01 | 1.00E+00 | -0.28 | 8.18E-01 | 9.77E-01 |
| GCKR       | 0.30  | 9.27E-01 | 1.00E+00 | -0.38 | 8.18E-01 | 9.77E-01 |
| TRPM7      | -0.14 | 5.97E-01 | 1.00E+00 | -0.06 | 8.18E-01 | 9.77E-01 |
| PCDHGB2    | -0.35 | 3.40E-01 | 1.00E+00 | 0.18  | 8.18E-01 | 9.77E-01 |

|                   |       |          |          |       |          |          |
|-------------------|-------|----------|----------|-------|----------|----------|
| <b>G35786</b>     | -0.73 | 6.36E-01 | 1.00E+00 | 0.22  | 8.18E-01 | 9.77E-01 |
| <b>LIMD1-AS1</b>  | -2.08 | 5.41E-01 | 1.00E+00 | -0.23 | 8.18E-01 | 9.77E-01 |
| <b>GALNT13</b>    | 0.68  | 4.73E-01 | 1.00E+00 | 0.50  | 8.18E-01 | 9.77E-01 |
| <b>LINC01393</b>  | -0.67 | 8.48E-01 | 1.00E+00 | 0.32  | 8.18E-01 | 9.77E-01 |
| <b>AL109615.3</b> | 0.89  | 6.85E-01 | 1.00E+00 | -0.22 | 8.18E-01 | 9.77E-01 |
| <b>AC105285.1</b> | 0.56  | 6.26E-01 | 1.00E+00 | -0.21 | 8.18E-01 | 9.77E-01 |
| <b>AC120114.3</b> | -1.07 | 5.71E-01 | 1.00E+00 | 0.24  | 8.18E-01 | 9.77E-01 |
| <b>SASH1</b>      | 0.02  | 8.92E-01 | 1.00E+00 | -0.06 | 8.18E-01 | 9.77E-01 |
| <b>FAM24B</b>     | -1.10 | 5.79E-01 | 1.00E+00 | 0.22  | 8.18E-01 | 9.77E-01 |
| <b>AC009133.1</b> | -0.52 | 1.92E-01 | 1.00E+00 | 0.15  | 8.19E-01 | 9.77E-01 |
| <b>AC087385.1</b> | -1.39 | 6.23E-01 | 1.00E+00 | 0.21  | 8.19E-01 | 9.77E-01 |
| <b>SLC41A3</b>    | 0.05  | 8.44E-01 | 1.00E+00 | 0.08  | 8.19E-01 | 9.77E-01 |
| <b>CR392039.4</b> | -1.26 | 1.84E-01 | 1.00E+00 | -0.25 | 8.19E-01 | 9.77E-01 |
| <b>KDM5A</b>      | 0.10  | 6.64E-01 | 1.00E+00 | -0.05 | 8.19E-01 | 9.77E-01 |
| <b>AC083843.2</b> | 0.73  | 5.06E-01 | 1.00E+00 | -0.28 | 8.19E-01 | 9.77E-01 |
| <b>ZXDA</b>       | -0.16 | 4.53E-01 | 1.00E+00 | -0.15 | 8.19E-01 | 9.77E-01 |
| <b>NDUFA9P1</b>   | 0.54  | 5.80E-01 | 1.00E+00 | 0.16  | 8.19E-01 | 9.77E-01 |
| <b>GSTM3</b>      | 0.55  | 7.18E-02 | 1.00E+00 | -0.12 | 8.19E-01 | 9.77E-01 |
| <b>CCDC191</b>    | -0.09 | 7.46E-01 | 1.00E+00 | -0.08 | 8.19E-01 | 9.77E-01 |
| <b>VWA3A</b>      | -0.90 | 3.11E-01 | 1.00E+00 | 0.16  | 8.19E-01 | 9.77E-01 |
| <b>ARIH2OS</b>    | 0.07  | 8.87E-01 | 1.00E+00 | 0.10  | 8.19E-01 | 9.77E-01 |
| <b>SHISA6</b>     | 0.84  | 1.12E-01 | 1.00E+00 | 0.72  | 8.19E-01 | 9.77E-01 |
| <b>AC022390.1</b> | 1.80  | 3.52E-01 | 1.00E+00 | 0.27  | 8.19E-01 | 9.77E-01 |
| <b>PLA2G4A</b>    | 0.35  | 1.95E-01 | 1.00E+00 | -0.06 | 8.19E-01 | 9.77E-01 |
| <b>LAMP2</b>      | 0.02  | 9.12E-01 | 1.00E+00 | -0.05 | 8.19E-01 | 9.77E-01 |
| <b>ZMAT4</b>      | -0.57 | 7.30E-01 | 1.00E+00 | 0.35  | 8.19E-01 | 9.77E-01 |
| <b>AC027097.2</b> | -0.08 | 8.50E-01 | 1.00E+00 | -0.15 | 8.19E-01 | 9.77E-01 |
| <b>CNTNAP3B</b>   | 1.06  | 2.06E-01 | 1.00E+00 | 0.12  | 8.19E-01 | 9.77E-01 |
| <b>TPSD1</b>      | 1.90  | 1.27E-01 | 1.00E+00 | -0.30 | 8.19E-01 | 9.77E-01 |
| <b>KANTR</b>      | 0.07  | 8.59E-01 | 1.00E+00 | 0.12  | 8.19E-01 | 9.77E-01 |
| <b>BTBD3</b>      | 0.22  | 3.44E-01 | 1.00E+00 | 0.05  | 8.19E-01 | 9.77E-01 |
| <b>NKAP</b>       | 0.03  | 8.73E-01 | 1.00E+00 | -0.06 | 8.19E-01 | 9.77E-01 |

|             |       |          |          |       |          |          |
|-------------|-------|----------|----------|-------|----------|----------|
| TTK         | 0.08  | 8.17E-01 | 1.00E+00 | 0.11  | 8.19E-01 | 9.77E-01 |
| NAA40       | 0.21  | 5.92E-01 | 1.00E+00 | 0.10  | 8.19E-01 | 9.77E-01 |
| GDPD5       | 0.23  | 7.00E-01 | 1.00E+00 | 0.16  | 8.19E-01 | 9.77E-01 |
| ZSCAN1      | 0.63  | 6.43E-01 | 1.00E+00 | 0.28  | 8.19E-01 | 9.77E-01 |
| LINC01559   | NA    | NA       | NA       | 0.73  | 8.19E-01 | 9.77E-01 |
| XLOC_002943 | 0.02  | 9.79E-01 | 1.00E+00 | -0.17 | 8.19E-01 | 9.77E-01 |
| ADAMTS8     | -0.12 | 7.87E-01 | 1.00E+00 | -0.72 | 8.20E-01 | 9.77E-01 |
| POGK        | -0.28 | 2.49E-01 | 1.00E+00 | -0.06 | 8.20E-01 | 9.77E-01 |
| CHCHD2      | -0.10 | 5.47E-01 | 1.00E+00 | -0.03 | 8.20E-01 | 9.77E-01 |
| SHISA4      | -0.24 | 4.60E-01 | 1.00E+00 | -0.08 | 8.20E-01 | 9.77E-01 |
| AL390719.2  | 0.68  | 4.36E-01 | 1.00E+00 | 0.26  | 8.20E-01 | 9.77E-01 |
| ACY1        | -1.26 | 5.28E-01 | 1.00E+00 | 0.20  | 8.20E-01 | 9.77E-01 |
| ZSWIM5      | -0.37 | 2.71E-01 | 1.00E+00 | 0.16  | 8.20E-01 | 9.77E-01 |
| AC073321.1  | NA    | NA       | NA       | 0.26  | 8.20E-01 | 9.77E-01 |
| MRPS28      | 0.28  | 5.61E-01 | 1.00E+00 | 0.12  | 8.20E-01 | 9.77E-01 |
| AC092652.3  | -2.53 | 3.48E-01 | 1.00E+00 | 0.28  | 8.20E-01 | 9.77E-01 |
| FASN        | 0.57  | 3.97E-01 | 1.00E+00 | -0.15 | 8.20E-01 | 9.77E-01 |
| UPF3B       | 0.09  | 7.38E-01 | 1.00E+00 | -0.05 | 8.20E-01 | 9.77E-01 |
| LRIT2       | 0.70  | 4.44E-01 | 1.00E+00 | 0.21  | 8.20E-01 | 9.77E-01 |
| POLA1       | -0.22 | 2.98E-01 | 1.00E+00 | 0.07  | 8.20E-01 | 9.77E-01 |
| MSN         | -0.17 | 4.26E-01 | 1.00E+00 | 0.09  | 8.20E-01 | 9.77E-01 |
| GSTM5       | 1.40  | 2.10E-03 | 2.39E-01 | 0.12  | 8.20E-01 | 9.77E-01 |
| PMF1        | 0.16  | 6.69E-01 | 1.00E+00 | -0.09 | 8.20E-01 | 9.77E-01 |
| MIR4453HG   | -0.30 | 2.94E-01 | 1.00E+00 | -0.11 | 8.20E-01 | 9.77E-01 |
| SATB2-AS1   | -0.76 | 2.99E-01 | 1.00E+00 | 0.11  | 8.21E-01 | 9.77E-01 |
| CLEC16A     | -0.27 | 3.36E-01 | 1.00E+00 | 0.10  | 8.21E-01 | 9.77E-01 |
| MITD1       | -0.03 | 8.99E-01 | 1.00E+00 | -0.04 | 8.21E-01 | 9.77E-01 |
| MIS18BP1    | -0.08 | 7.63E-01 | 1.00E+00 | -0.05 | 8.21E-01 | 9.77E-01 |
| AL133406.2  | -1.68 | 4.99E-01 | 1.00E+00 | -0.39 | 8.21E-01 | 9.77E-01 |
| XLOC_000895 | -1.10 | 2.38E-01 | 1.00E+00 | 0.25  | 8.21E-01 | 9.77E-01 |
| SF3A3       | -0.05 | 7.42E-01 | 1.00E+00 | -0.03 | 8.21E-01 | 9.77E-01 |
| ISLR2       | -0.33 | 6.27E-01 | 1.00E+00 | 0.22  | 8.21E-01 | 9.77E-01 |



|             |        |          |          |       |          |          |
|-------------|--------|----------|----------|-------|----------|----------|
| DENND6A     | -0.19  | 4.86E-01 | 1.00E+00 | 0.12  | 8.21E-01 | 9.77E-01 |
| RBAK        | -0.03  | 9.20E-01 | 1.00E+00 | -0.09 | 8.21E-01 | 9.77E-01 |
| GYG2P1      | -0.91  | 6.59E-01 | 1.00E+00 | 0.51  | 8.21E-01 | 9.77E-01 |
| MRVI1-AS1   | -0.41  | 8.01E-01 | 1.00E+00 | -0.26 | 8.21E-01 | 9.78E-01 |
| C17orf82    | -1.05  | 3.62E-01 | 1.00E+00 | -0.26 | 8.21E-01 | 9.78E-01 |
| FLYWCH1     | -0.24  | 1.81E-01 | 1.00E+00 | 0.14  | 8.21E-01 | 9.78E-01 |
| BMS1P11     | -0.23  | 9.02E-01 | 1.00E+00 | -0.15 | 8.21E-01 | 9.78E-01 |
| PTPN20A     | -1.90  | 1.25E-01 | 1.00E+00 | -0.14 | 8.21E-01 | 9.78E-01 |
| GDE1        | 0.03   | 8.98E-01 | 1.00E+00 | 0.05  | 8.21E-01 | 9.78E-01 |
| GJA5        | 0.81   | 2.87E-01 | 1.00E+00 | 0.20  | 8.22E-01 | 9.78E-01 |
| XLOC_007512 | -0.17  | 8.85E-01 | 1.00E+00 | 0.69  | 8.22E-01 | 9.78E-01 |
| LYPLA2P2    | NA     | NA       | NA       | 0.15  | 8.22E-01 | 9.78E-01 |
| USP21       | 0.14   | 5.49E-01 | 1.00E+00 | -0.04 | 8.22E-01 | 9.78E-01 |
| FBXL14      | -0.13  | 5.68E-01 | 1.00E+00 | 0.20  | 8.22E-01 | 9.78E-01 |
| GJB5        | 0.12   | 7.84E-01 | 1.00E+00 | 0.14  | 8.22E-01 | 9.78E-01 |
| TUFT1       | 0.03   | 9.38E-01 | 1.00E+00 | -0.08 | 8.22E-01 | 9.78E-01 |
| RBM6        | -0.24  | 2.61E-01 | 1.00E+00 | 0.05  | 8.22E-01 | 9.78E-01 |
| MAN2C1      | -0.15  | 5.33E-01 | 1.00E+00 | 0.09  | 8.22E-01 | 9.78E-01 |
| OPTN        | 0.16   | 4.94E-01 | 1.00E+00 | -0.03 | 8.22E-01 | 9.78E-01 |
| MEG8        | -0.11  | 8.79E-01 | 1.00E+00 | -0.19 | 8.22E-01 | 9.78E-01 |
| RAD51D      | 0.20   | 5.78E-01 | 1.00E+00 | -0.08 | 8.22E-01 | 9.78E-01 |
| SQLE        | -0.38  | 4.13E-01 | 1.00E+00 | 0.08  | 8.22E-01 | 9.78E-01 |
| AL136419.1  | 1.58   | 5.55E-01 | 1.00E+00 | 0.25  | 8.22E-01 | 9.78E-01 |
| CCDC42      | -1.04  | 7.61E-01 | 1.00E+00 | -0.37 | 8.22E-01 | 9.78E-01 |
| KRTAP10-8   | -30.00 | 3.42E-18 | 5.54E-15 | -0.72 | 8.22E-01 | 9.78E-01 |
| C1QTNF2     | 0.43   | 1.80E-01 | 1.00E+00 | -0.09 | 8.22E-01 | 9.78E-01 |
| HNRNPA2B1   | -0.12  | 5.15E-01 | 1.00E+00 | -0.06 | 8.22E-01 | 9.78E-01 |
| ERC2        | -4.71  | 3.49E-05 | 9.61E-03 | -0.32 | 8.23E-01 | 9.78E-01 |
| AC106820.4  | -0.34  | 7.67E-01 | 1.00E+00 | 0.34  | 8.23E-01 | 9.78E-01 |
| SMTN        | -0.25  | 5.79E-01 | 1.00E+00 | 0.11  | 8.23E-01 | 9.78E-01 |
| NPAS2       | 0.02   | 9.49E-01 | 1.00E+00 | -0.11 | 8.23E-01 | 9.78E-01 |
| TRUB1       | 0.14   | 5.83E-01 | 1.00E+00 | -0.05 | 8.23E-01 | 9.78E-01 |

|                   |       |          |          |       |          |          |
|-------------------|-------|----------|----------|-------|----------|----------|
| <b>RAB2B</b>      | 0.18  | 4.89E-01 | 1.00E+00 | 0.07  | 8.23E-01 | 9.78E-01 |
| <b>PAICS</b>      | -0.12 | 6.15E-01 | 1.00E+00 | 0.05  | 8.23E-01 | 9.78E-01 |
| <b>MAPK14</b>     | 0.42  | 7.11E-02 | 1.00E+00 | -0.09 | 8.23E-01 | 9.78E-01 |
| <b>G41381</b>     | 0.05  | 9.62E-01 | 1.00E+00 | -0.27 | 8.23E-01 | 9.78E-01 |
| <b>TP53BP1</b>    | -0.24 | 3.03E-01 | 1.00E+00 | 0.10  | 8.23E-01 | 9.78E-01 |
| <b>FGF7P8</b>     | -1.44 | 2.49E-01 | 1.00E+00 | 0.11  | 8.23E-01 | 9.78E-01 |
| <b>GLO1</b>       | 0.13  | 5.77E-01 | 1.00E+00 | -0.07 | 8.23E-01 | 9.78E-01 |
| <b>MEF2A</b>      | -0.08 | 7.26E-01 | 1.00E+00 | -0.04 | 8.23E-01 | 9.78E-01 |
| <b>AL161910.1</b> | 1.54  | 1.34E-01 | 1.00E+00 | -0.31 | 8.23E-01 | 9.78E-01 |
| <b>LINC01220</b>  | 1.91  | 1.00E-01 | 1.00E+00 | -0.24 | 8.23E-01 | 9.78E-01 |
| <b>ABHD5</b>      | 0.21  | 5.70E-01 | 1.00E+00 | -0.06 | 8.23E-01 | 9.78E-01 |
| <b>AC008280.3</b> | -0.42 | 6.36E-01 | 1.00E+00 | -0.14 | 8.23E-01 | 9.78E-01 |
| <b>SMIM20</b>     | 0.06  | 8.63E-01 | 1.00E+00 | -0.06 | 8.23E-01 | 9.78E-01 |
| <b>HARBI1</b>     | -0.01 | 9.66E-01 | 1.00E+00 | 0.07  | 8.23E-01 | 9.78E-01 |
| <b>CHL1-AS1</b>   | 0.19  | 9.06E-01 | 1.00E+00 | -0.18 | 8.23E-01 | 9.78E-01 |
| <b>STRN</b>       | 0.22  | 4.50E-01 | 1.00E+00 | -0.11 | 8.23E-01 | 9.78E-01 |
| <b>KLHL8</b>      | 0.36  | 9.38E-02 | 1.00E+00 | 0.04  | 8.23E-01 | 9.78E-01 |
| <b>FRG1BP</b>     | -0.02 | 9.38E-01 | 1.00E+00 | 0.06  | 8.24E-01 | 9.78E-01 |
| <b>ROCK2</b>      | -0.05 | 8.46E-01 | 1.00E+00 | -0.09 | 8.24E-01 | 9.78E-01 |
| <b>KLHL3</b>      | 0.17  | 7.55E-01 | 1.00E+00 | -0.13 | 8.24E-01 | 9.78E-01 |
| <b>AL078644.1</b> | 2.13  | 2.43E-01 | 1.00E+00 | -0.25 | 8.24E-01 | 9.78E-01 |
| <b>E2F8</b>       | -0.48 | 3.14E-01 | 1.00E+00 | 0.18  | 8.24E-01 | 9.78E-01 |
| <b>AC024940.2</b> | 1.86  | 2.95E-01 | 1.00E+00 | -0.15 | 8.24E-01 | 9.78E-01 |
| <b>PTRH1</b>      | -1.43 | 3.85E-01 | 1.00E+00 | 0.18  | 8.24E-01 | 9.78E-01 |
| <b>PDZK1</b>      | 0.66  | 3.48E-01 | 1.00E+00 | -0.20 | 8.24E-01 | 9.78E-01 |
| <b>LRRC4B</b>     | -0.41 | 4.24E-01 | 1.00E+00 | 0.70  | 8.24E-01 | 9.78E-01 |
| <b>CDC25C</b>     | -0.02 | 9.76E-01 | 1.00E+00 | 0.17  | 8.24E-01 | 9.78E-01 |
| <b>NME6</b>       | 0.16  | 4.15E-01 | 1.00E+00 | 0.05  | 8.24E-01 | 9.78E-01 |
| <b>BDH2</b>       | 0.20  | 4.86E-01 | 1.00E+00 | 0.07  | 8.24E-01 | 9.78E-01 |
| <b>ALDOB</b>      | 3.20  | 1.66E-01 | 1.00E+00 | -0.28 | 8.24E-01 | 9.78E-01 |
| <b>AC007490.1</b> | 0.07  | 9.72E-01 | 1.00E+00 | 0.27  | 8.24E-01 | 9.78E-01 |
| <b>AC092484.1</b> | -2.71 | 1.02E-01 | 1.00E+00 | 0.19  | 8.24E-01 | 9.78E-01 |

|             |       |          |          |       |          |          |
|-------------|-------|----------|----------|-------|----------|----------|
| ENPEP       | 0.08  | 8.80E-01 | 1.00E+00 | 0.15  | 8.24E-01 | 9.78E-01 |
| ALG10B      | 0.39  | 3.41E-01 | 1.00E+00 | -0.06 | 8.24E-01 | 9.78E-01 |
| SNX9        | 0.12  | 5.78E-01 | 1.00E+00 | -0.09 | 8.24E-01 | 9.78E-01 |
| EFNA1       | -0.26 | 4.34E-01 | 1.00E+00 | -0.08 | 8.24E-01 | 9.78E-01 |
| UBE2J1      | -0.05 | 8.03E-01 | 1.00E+00 | 0.06  | 8.24E-01 | 9.78E-01 |
| FAM193B     | -0.41 | 1.85E-01 | 1.00E+00 | 0.12  | 8.25E-01 | 9.78E-01 |
| PCARE       | 0.44  | 3.79E-01 | 1.00E+00 | -0.10 | 8.25E-01 | 9.78E-01 |
| TMEM263     | 0.50  | 1.27E-01 | 1.00E+00 | 0.08  | 8.25E-01 | 9.78E-01 |
| MEA1        | -0.02 | 9.21E-01 | 1.00E+00 | 0.05  | 8.25E-01 | 9.78E-01 |
| FAM107A     | 0.43  | 2.68E-01 | 1.00E+00 | 0.11  | 8.25E-01 | 9.78E-01 |
| NIF3L1      | 0.10  | 5.55E-01 | 1.00E+00 | -0.07 | 8.25E-01 | 9.78E-01 |
| MFAP5       | 0.50  | 4.96E-01 | 1.00E+00 | -0.14 | 8.25E-01 | 9.78E-01 |
| VAMP8       | 0.14  | 6.12E-01 | 1.00E+00 | -0.08 | 8.25E-01 | 9.78E-01 |
| AL450332.1  | -2.69 | 1.37E-01 | 1.00E+00 | 0.23  | 8.25E-01 | 9.78E-01 |
| PIGR        | 2.03  | 2.49E-01 | 1.00E+00 | -0.70 | 8.25E-01 | 9.78E-01 |
| SVIL        | -0.07 | 8.15E-01 | 1.00E+00 | -0.07 | 8.25E-01 | 9.78E-01 |
| HNRNPA1P1   | -0.06 | 9.86E-01 | 1.00E+00 | -0.22 | 8.25E-01 | 9.78E-01 |
| ATP6V0E1    | 0.08  | 6.13E-01 | 1.00E+00 | 0.05  | 8.25E-01 | 9.78E-01 |
| RWDD2A      | -0.16 | 5.77E-01 | 1.00E+00 | -0.08 | 8.25E-01 | 9.78E-01 |
| AC104024.2  | -0.70 | 5.24E-01 | 1.00E+00 | -0.30 | 8.25E-01 | 9.78E-01 |
| RSPH3       | -0.23 | 2.36E-01 | 1.00E+00 | 0.04  | 8.25E-01 | 9.78E-01 |
| MCAT        | -0.08 | 7.38E-01 | 1.00E+00 | 0.09  | 8.25E-01 | 9.78E-01 |
| FAM86B3P    | 0.00  | 9.95E-01 | 1.00E+00 | 0.15  | 8.25E-01 | 9.78E-01 |
| Z95704.5    | -1.03 | 5.57E-01 | 1.00E+00 | -0.22 | 8.25E-01 | 9.78E-01 |
| AC012676.1  | 0.83  | 4.10E-01 | 1.00E+00 | 0.29  | 8.25E-01 | 9.78E-01 |
| XLOC_005818 | 2.75  | 1.33E-01 | 1.00E+00 | -0.25 | 8.25E-01 | 9.78E-01 |
| RPL9P9      | -0.27 | 6.65E-01 | 1.00E+00 | -0.19 | 8.25E-01 | 9.78E-01 |
| STX6        | 0.01  | 9.51E-01 | 1.00E+00 | -0.09 | 8.25E-01 | 9.78E-01 |
| MSS51       | 1.09  | 2.92E-01 | 1.00E+00 | 0.27  | 8.25E-01 | 9.78E-01 |
| ZNF799      | 0.29  | 5.07E-01 | 1.00E+00 | -0.07 | 8.25E-01 | 9.78E-01 |
| ZFP82       | 0.46  | 4.70E-01 | 1.00E+00 | 0.09  | 8.25E-01 | 9.78E-01 |
| KIAA1549    | -0.02 | 9.66E-01 | 1.00E+00 | 0.15  | 8.25E-01 | 9.78E-01 |

|             |       |          |          |       |          |          |
|-------------|-------|----------|----------|-------|----------|----------|
| VPS25       | -0.18 | 3.75E-01 | 1.00E+00 | 0.04  | 8.25E-01 | 9.78E-01 |
| AL020997.1  | -2.85 | 1.43E-01 | 1.00E+00 | -0.20 | 8.26E-01 | 9.78E-01 |
| XLOC_014066 | 0.92  | 7.33E-01 | 1.00E+00 | -0.23 | 8.26E-01 | 9.78E-01 |
| AC008957.3  | 0.01  | 9.96E-01 | 1.00E+00 | 0.38  | 8.26E-01 | 9.78E-01 |
| CALU        | 0.01  | 9.70E-01 | 1.00E+00 | 0.07  | 8.26E-01 | 9.78E-01 |
| UBE2R2      | -0.06 | 7.54E-01 | 1.00E+00 | 0.07  | 8.26E-01 | 9.78E-01 |
| RBFADN      | 0.69  | 5.11E-01 | 1.00E+00 | -0.18 | 8.26E-01 | 9.78E-01 |
| SPSB2       | -0.23 | 3.47E-01 | 1.00E+00 | -0.07 | 8.26E-01 | 9.78E-01 |
| PRDM16      | -0.16 | 8.06E-01 | 1.00E+00 | 0.19  | 8.26E-01 | 9.78E-01 |
| AL137003.2  | 0.66  | 2.13E-01 | 1.00E+00 | 0.12  | 8.26E-01 | 9.78E-01 |
| DMKN        | 0.07  | 8.94E-01 | 1.00E+00 | 0.14  | 8.26E-01 | 9.78E-01 |
| AXDND1      | -1.35 | 5.75E-01 | 1.00E+00 | 0.29  | 8.26E-01 | 9.78E-01 |
| AC012531.1  | -0.30 | 8.66E-01 | 1.00E+00 | 0.30  | 8.26E-01 | 9.78E-01 |
| PGPEP1L     | -1.27 | 6.74E-01 | 1.00E+00 | 0.26  | 8.26E-01 | 9.78E-01 |
| BCL2L14     | -1.54 | 1.44E-01 | 1.00E+00 | 0.69  | 8.26E-01 | 9.78E-01 |
| KCNK1       | -0.25 | 6.44E-01 | 1.00E+00 | 0.12  | 8.26E-01 | 9.78E-01 |
| AL136126.1  | 0.90  | 7.96E-01 | 1.00E+00 | -0.19 | 8.26E-01 | 9.78E-01 |
| DYNC1LI2    | 0.04  | 8.69E-01 | 1.00E+00 | -0.05 | 8.26E-01 | 9.78E-01 |
| XLOC_001343 | -0.06 | 9.03E-01 | 1.00E+00 | -0.11 | 8.26E-01 | 9.78E-01 |
| BMP8B       | -0.37 | 1.37E-01 | 1.00E+00 | -0.17 | 8.26E-01 | 9.78E-01 |
| IVNS1ABP    | 0.04  | 8.48E-01 | 1.00E+00 | -0.05 | 8.26E-01 | 9.78E-01 |
| FPGT        | 0.27  | 5.18E-01 | 1.00E+00 | -0.09 | 8.26E-01 | 9.78E-01 |
| G31075      | -2.45 | 4.63E-02 | 1.00E+00 | 0.28  | 8.26E-01 | 9.78E-01 |
| LMO4        | -0.08 | 7.52E-01 | 1.00E+00 | -0.04 | 8.26E-01 | 9.78E-01 |
| AC069213.1  | -0.85 | 5.05E-01 | 1.00E+00 | 0.21  | 8.26E-01 | 9.78E-01 |
| CADM3-AS1   | 0.12  | 8.98E-01 | 1.00E+00 | -0.23 | 8.27E-01 | 9.78E-01 |
| MAT1A       | -0.78 | 1.29E-01 | 1.00E+00 | -0.17 | 8.27E-01 | 9.78E-01 |
| NIPAA2      | 0.07  | 6.68E-01 | 1.00E+00 | 0.04  | 8.27E-01 | 9.78E-01 |
| G39662      | 1.21  | 3.68E-01 | 1.00E+00 | -0.17 | 8.27E-01 | 9.78E-01 |
| MRPL45P2    | -1.24 | 6.10E-02 | 1.00E+00 | -0.08 | 8.27E-01 | 9.78E-01 |
| AC007405.3  | 0.74  | 3.85E-01 | 1.00E+00 | -0.16 | 8.27E-01 | 9.78E-01 |
| AC118553.1  | 0.07  | 9.48E-01 | 1.00E+00 | -0.19 | 8.27E-01 | 9.78E-01 |

|                     |       |          |          |       |          |          |
|---------------------|-------|----------|----------|-------|----------|----------|
| <b>G23907</b>       | 1.58  | 1.22E-01 | 1.00E+00 | -0.23 | 8.27E-01 | 9.78E-01 |
| <b>CSPP1</b>        | 0.19  | 3.62E-01 | 1.00E+00 | -0.05 | 8.27E-01 | 9.78E-01 |
| <b>RAB10</b>        | 0.05  | 8.84E-01 | 1.00E+00 | 0.05  | 8.27E-01 | 9.78E-01 |
| <b>PICART1</b>      | -1.23 | 5.60E-02 | 1.00E+00 | 0.22  | 8.27E-01 | 9.78E-01 |
| <b>DNLZ</b>         | -1.48 | 1.40E-01 | 1.00E+00 | 0.32  | 8.27E-01 | 9.78E-01 |
| <b>ASCL4</b>        | -1.07 | 3.49E-01 | 1.00E+00 | 0.24  | 8.27E-01 | 9.78E-01 |
| <b>RASGRF1</b>      | 0.25  | 7.87E-01 | 1.00E+00 | 0.27  | 8.27E-01 | 9.78E-01 |
| <b>APOL4</b>        | -0.34 | 5.23E-01 | 1.00E+00 | 0.11  | 8.27E-01 | 9.78E-01 |
| <b>TACR2</b>        | -0.09 | 8.93E-01 | 1.00E+00 | -0.13 | 8.27E-01 | 9.78E-01 |
| <b>ZDHHC21</b>      | -0.21 | 4.79E-01 | 1.00E+00 | 0.07  | 8.27E-01 | 9.78E-01 |
| <b>FAUP1</b>        | -1.87 | 3.77E-01 | 1.00E+00 | -0.14 | 8.27E-01 | 9.78E-01 |
| <b>AL139353.3</b>   | -2.97 | 3.05E-01 | 1.00E+00 | 0.28  | 8.27E-01 | 9.78E-01 |
| <b>TJP2</b>         | 0.05  | 7.92E-01 | 1.00E+00 | -0.11 | 8.27E-01 | 9.78E-01 |
| <b>TUBB4A</b>       | -0.88 | 2.97E-01 | 1.00E+00 | 0.11  | 8.27E-01 | 9.78E-01 |
| <b>SLC4A1</b>       | -1.27 | 3.70E-01 | 1.00E+00 | -0.29 | 8.27E-01 | 9.78E-01 |
| <b>IGHV6-1</b>      | 0.56  | 8.71E-01 | 1.00E+00 | 0.70  | 8.27E-01 | 9.78E-01 |
| <b>POMT1</b>        | 0.21  | 5.12E-01 | 1.00E+00 | -0.05 | 8.27E-01 | 9.78E-01 |
| <b>XLOC_003775</b>  | -1.27 | 7.14E-01 | 1.00E+00 | -0.31 | 8.27E-01 | 9.78E-01 |
| <b>UTS2</b>         | -3.43 | 3.11E-01 | 1.00E+00 | -0.33 | 8.27E-01 | 9.78E-01 |
| <b>PTDSS2</b>       | -0.11 | 6.70E-01 | 1.00E+00 | 0.10  | 8.27E-01 | 9.78E-01 |
| <b>AC016588.2</b>   | 0.38  | 6.03E-01 | 1.00E+00 | -0.12 | 8.28E-01 | 9.78E-01 |
| <b>UBA3</b>         | 0.17  | 4.08E-01 | 1.00E+00 | -0.08 | 8.28E-01 | 9.78E-01 |
| <b>CIT</b>          | -0.23 | 4.86E-01 | 1.00E+00 | 0.08  | 8.28E-01 | 9.78E-01 |
| <b>AL645929.1</b>   | 0.18  | 8.65E-01 | 1.00E+00 | 0.14  | 8.28E-01 | 9.78E-01 |
| <b>PCIF1</b>        | -0.19 | 3.92E-01 | 1.00E+00 | 0.03  | 8.28E-01 | 9.78E-01 |
| <b>TRPC3</b>        | -1.20 | 3.42E-01 | 1.00E+00 | 0.31  | 8.28E-01 | 9.78E-01 |
| <b>RPL7AP60</b>     | -3.01 | 9.96E-02 | 1.00E+00 | 0.19  | 8.28E-01 | 9.78E-01 |
| <b>VPS35L</b>       | -0.12 | 4.89E-01 | 1.00E+00 | -0.04 | 8.28E-01 | 9.78E-01 |
| <b>AC098591.2</b>   | 0.91  | 7.93E-01 | 1.00E+00 | -0.17 | 8.28E-01 | 9.78E-01 |
| <b>PLBD1-AS1</b>    | 0.08  | 8.88E-01 | 1.00E+00 | 0.10  | 8.28E-01 | 9.78E-01 |
| <b>SLC25A21-AS1</b> | 0.48  | 5.30E-01 | 1.00E+00 | -0.15 | 8.28E-01 | 9.78E-01 |
| <b>GAPDHP65</b>     | 1.56  | 6.54E-01 | 1.00E+00 | 0.17  | 8.28E-01 | 9.78E-01 |

|                    |       |          |          |       |          |          |
|--------------------|-------|----------|----------|-------|----------|----------|
| <b>SEL1L</b>       | 0.18  | 3.43E-01 | 1.00E+00 | 0.04  | 8.28E-01 | 9.78E-01 |
| <b>ASL</b>         | -0.06 | 7.83E-01 | 1.00E+00 | 0.05  | 8.28E-01 | 9.78E-01 |
| <b>NECAB3</b>      | -0.40 | 2.62E-01 | 1.00E+00 | -0.12 | 8.28E-01 | 9.78E-01 |
| <b>PRKAR2A</b>     | 0.19  | 3.42E-01 | 1.00E+00 | 0.04  | 8.28E-01 | 9.78E-01 |
| <b>EFS</b>         | -0.34 | 2.15E-01 | 1.00E+00 | -0.11 | 8.28E-01 | 9.78E-01 |
| <b>G23048</b>      | -0.24 | 8.99E-01 | 1.00E+00 | -0.26 | 8.28E-01 | 9.78E-01 |
| <b>FUBP3</b>       | 0.05  | 7.67E-01 | 1.00E+00 | -0.07 | 8.28E-01 | 9.78E-01 |
| <b>NUMBL</b>       | -0.07 | 8.22E-01 | 1.00E+00 | 0.13  | 8.28E-01 | 9.78E-01 |
| <b>ACAD10</b>      | 0.24  | 3.15E-01 | 1.00E+00 | 0.05  | 8.28E-01 | 9.78E-01 |
| <b>AC090517.2</b>  | -0.63 | 5.20E-01 | 1.00E+00 | -0.14 | 8.28E-01 | 9.78E-01 |
| <b>LINC01139</b>   | 1.09  | 5.35E-03 | 4.31E-01 | 0.20  | 8.28E-01 | 9.78E-01 |
| <b>IL13</b>        | 3.51  | 2.97E-01 | 1.00E+00 | -0.50 | 8.28E-01 | 9.78E-01 |
| <b>CYYR1-AS1</b>   | -4.11 | 3.97E-02 | 1.00E+00 | -0.28 | 8.29E-01 | 9.78E-01 |
| <b>ARHGEF37</b>    | 0.24  | 2.49E-01 | 1.00E+00 | -0.08 | 8.29E-01 | 9.78E-01 |
| <b>CD34</b>        | 0.27  | 5.61E-01 | 1.00E+00 | 0.10  | 8.29E-01 | 9.78E-01 |
| <b>ECT2L</b>       | -0.96 | 1.23E-01 | 1.00E+00 | -0.15 | 8.29E-01 | 9.78E-01 |
| <b>AC092295.2</b>  | -0.29 | 4.15E-01 | 1.00E+00 | 0.18  | 8.29E-01 | 9.78E-01 |
| <b>ECPAS</b>       | 0.00  | 9.81E-01 | 1.00E+00 | -0.07 | 8.29E-01 | 9.78E-01 |
| <b>IL12A</b>       | 0.02  | 9.91E-01 | 1.00E+00 | 0.28  | 8.29E-01 | 9.78E-01 |
| <b>TEPP</b>        | -3.01 | 2.76E-02 | 9.71E-01 | 0.14  | 8.29E-01 | 9.78E-01 |
| <b>GP1BA</b>       | -0.78 | 5.80E-02 | 1.00E+00 | 0.15  | 8.29E-01 | 9.78E-01 |
| <b>XLOC_014188</b> | -1.29 | 6.93E-01 | 1.00E+00 | -0.32 | 8.29E-01 | 9.78E-01 |
| <b>DLGAP1-AS2</b>  | -0.60 | 5.57E-01 | 1.00E+00 | 0.18  | 8.29E-01 | 9.78E-01 |
| <b>FAR2P2</b>      | 0.88  | 3.10E-01 | 1.00E+00 | -0.17 | 8.29E-01 | 9.78E-01 |
| <b>HSPG2</b>       | -0.01 | 9.79E-01 | 1.00E+00 | 0.68  | 8.29E-01 | 9.78E-01 |
| <b>AC093627.4</b>  | 0.23  | 6.78E-01 | 1.00E+00 | 0.19  | 8.29E-01 | 9.78E-01 |
| <b>ZNF835</b>      | 0.74  | 3.61E-01 | 1.00E+00 | -0.46 | 8.29E-01 | 9.78E-01 |
| <b>ST14</b>        | -0.45 | 1.93E-01 | 1.00E+00 | 0.13  | 8.29E-01 | 9.78E-01 |
| <b>CDKN1C</b>      | 0.24  | 6.22E-01 | 1.00E+00 | 0.13  | 8.29E-01 | 9.78E-01 |
| <b>TMEM256P2</b>   | 1.48  | 6.66E-01 | 1.00E+00 | -0.29 | 8.29E-01 | 9.78E-01 |
| <b>UTF1</b>        | 0.43  | 8.87E-01 | 1.00E+00 | 0.43  | 8.29E-01 | 9.78E-01 |
| <b>G25511</b>      | 0.79  | 4.43E-01 | 1.00E+00 | -0.14 | 8.29E-01 | 9.78E-01 |

|                    |       |          |          |       |          |          |
|--------------------|-------|----------|----------|-------|----------|----------|
| <b>XLOC_014369</b> | 0.05  | 9.69E-01 | 1.00E+00 | -0.21 | 8.29E-01 | 9.78E-01 |
| <b>RPL23P2</b>     | 0.87  | 5.93E-01 | 1.00E+00 | -0.21 | 8.29E-01 | 9.79E-01 |
| <b>B4GALT2</b>     | -0.23 | 2.48E-01 | 1.00E+00 | -0.09 | 8.30E-01 | 9.79E-01 |
| <b>LIPN</b>        | -0.23 | 7.65E-01 | 1.00E+00 | 0.15  | 8.30E-01 | 9.79E-01 |
| <b>CRISPLD1</b>    | -0.18 | 7.88E-01 | 1.00E+00 | -0.11 | 8.30E-01 | 9.79E-01 |
| <b>METTL26</b>     | -0.36 | 9.12E-02 | 1.00E+00 | 0.06  | 8.30E-01 | 9.79E-01 |
| <b>PRDM5</b>       | -0.12 | 7.39E-01 | 1.00E+00 | 0.09  | 8.30E-01 | 9.79E-01 |
| <b>NOL7</b>        | 0.55  | 1.25E-01 | 1.00E+00 | 0.12  | 8.30E-01 | 9.79E-01 |
| <b>EARS2</b>       | -0.01 | 9.56E-01 | 1.00E+00 | -0.04 | 8.30E-01 | 9.79E-01 |
| <b>RPS2P44</b>     | -0.32 | 9.26E-01 | 1.00E+00 | -0.31 | 8.30E-01 | 9.79E-01 |
| <b>AC234775.3</b>  | -0.29 | 7.64E-01 | 1.00E+00 | 0.19  | 8.30E-01 | 9.79E-01 |
| <b>AL008729.1</b>  | 0.00  | 9.98E-01 | 1.00E+00 | -0.50 | 8.30E-01 | 9.79E-01 |
| <b>NPR1</b>        | 1.07  | 8.77E-02 | 1.00E+00 | 0.16  | 8.30E-01 | 9.79E-01 |
| <b>ELL3</b>        | 1.98  | 8.68E-02 | 1.00E+00 | -0.20 | 8.30E-01 | 9.79E-01 |
| <b>NRL</b>         | -0.77 | 1.61E-01 | 1.00E+00 | 0.17  | 8.30E-01 | 9.79E-01 |
| <b>JUP</b>         | -0.22 | 6.20E-01 | 1.00E+00 | -0.11 | 8.30E-01 | 9.79E-01 |
| <b>XLOC_001680</b> | -0.37 | 8.99E-01 | 1.00E+00 | 0.22  | 8.30E-01 | 9.79E-01 |
| <b>MAML3</b>       | -0.41 | 2.55E-01 | 1.00E+00 | 0.08  | 8.31E-01 | 9.79E-01 |
| <b>PRKAA1</b>      | 0.07  | 7.78E-01 | 1.00E+00 | -0.04 | 8.31E-01 | 9.79E-01 |
| <b>NDOR1</b>       | -0.24 | 4.36E-01 | 1.00E+00 | 0.13  | 8.31E-01 | 9.79E-01 |
| <b>AL451074.2</b>  | 1.03  | 4.24E-01 | 1.00E+00 | -0.23 | 8.31E-01 | 9.79E-01 |
| <b>TIMMDC1</b>     | -0.05 | 7.70E-01 | 1.00E+00 | -0.05 | 8.31E-01 | 9.79E-01 |
| <b>PLAA</b>        | 0.00  | 9.86E-01 | 1.00E+00 | 0.05  | 8.31E-01 | 9.79E-01 |
| <b>HEPACAM</b>     | 2.85  | 1.66E-01 | 1.00E+00 | -0.68 | 8.31E-01 | 9.79E-01 |
| <b>BOK</b>         | 0.57  | 2.01E-01 | 1.00E+00 | -0.10 | 8.31E-01 | 9.79E-01 |
| <b>RNF43</b>       | -0.39 | 2.56E-01 | 1.00E+00 | 0.12  | 8.31E-01 | 9.79E-01 |
| <b>RIOX1</b>       | -0.11 | 6.64E-01 | 1.00E+00 | -0.10 | 8.31E-01 | 9.79E-01 |
| <b>AC092118.1</b>  | -0.01 | 9.91E-01 | 1.00E+00 | 0.18  | 8.31E-01 | 9.79E-01 |
| <b>TMEM269</b>     | -0.78 | 3.54E-01 | 1.00E+00 | -0.11 | 8.31E-01 | 9.79E-01 |
| <b>ABCA4</b>       | -0.92 | 8.83E-02 | 1.00E+00 | 0.17  | 8.31E-01 | 9.79E-01 |
| <b>CRACR2A</b>     | 0.13  | 8.77E-01 | 1.00E+00 | 0.15  | 8.31E-01 | 9.80E-01 |
| <b>ZNF280D</b>     | 0.18  | 5.54E-01 | 1.00E+00 | 0.06  | 8.31E-01 | 9.80E-01 |

|                   |       |          |          |       |          |          |
|-------------------|-------|----------|----------|-------|----------|----------|
| <b>CDC42EP1</b>   | -0.27 | 4.15E-01 | 1.00E+00 | 0.09  | 8.32E-01 | 9.80E-01 |
| <b>IDH3A</b>      | -0.23 | 3.12E-01 | 1.00E+00 | 0.05  | 8.32E-01 | 9.80E-01 |
| <b>BPTF</b>       | -0.12 | 6.06E-01 | 1.00E+00 | 0.06  | 8.32E-01 | 9.80E-01 |
| <b>TUBA1A</b>     | -0.34 | 2.01E-01 | 1.00E+00 | -0.05 | 8.32E-01 | 9.80E-01 |
| <b>WDR59</b>      | -0.15 | 4.73E-01 | 1.00E+00 | -0.09 | 8.32E-01 | 9.80E-01 |
| <b>SAFB2</b>      | -0.12 | 6.12E-01 | 1.00E+00 | 0.08  | 8.32E-01 | 9.80E-01 |
| <b>GXYLT2</b>     | 0.18  | 7.13E-01 | 1.00E+00 | -0.11 | 8.32E-01 | 9.80E-01 |
| <b>NSRP1</b>      | 0.07  | 7.57E-01 | 1.00E+00 | -0.06 | 8.32E-01 | 9.80E-01 |
| <b>AL031118.1</b> | 1.08  | 7.96E-02 | 1.00E+00 | 0.20  | 8.32E-01 | 9.80E-01 |
| <b>IGFBP7-AS1</b> | -2.58 | 2.88E-01 | 1.00E+00 | 0.24  | 8.32E-01 | 9.80E-01 |
| <b>C1DP1</b>      | -0.80 | 8.18E-01 | 1.00E+00 | 0.24  | 8.32E-01 | 9.80E-01 |
| <b>CAMTA2</b>     | -0.16 | 5.23E-01 | 1.00E+00 | 0.09  | 8.32E-01 | 9.80E-01 |
| <b>NONOP2</b>     | 0.27  | 6.77E-01 | 1.00E+00 | -0.13 | 8.32E-01 | 9.80E-01 |
| <b>DDX11L2</b>    | -3.08 | 4.57E-02 | 1.00E+00 | -0.23 | 8.32E-01 | 9.80E-01 |
| <b>GRPEL2</b>     | -0.25 | 3.78E-01 | 1.00E+00 | 0.07  | 8.32E-01 | 9.80E-01 |
| <b>TRIM39</b>     | 0.33  | 1.36E-01 | 1.00E+00 | -0.09 | 8.32E-01 | 9.80E-01 |
| <b>FAM198B</b>    | 0.23  | 6.81E-01 | 1.00E+00 | 0.10  | 8.32E-01 | 9.80E-01 |
| <b>FNBP1</b>      | 0.05  | 8.75E-01 | 1.00E+00 | 0.09  | 8.32E-01 | 9.80E-01 |
| <b>EFCC1</b>      | 0.04  | 9.07E-01 | 1.00E+00 | -0.18 | 8.32E-01 | 9.80E-01 |
| <b>ANXA1</b>      | 0.41  | 8.04E-02 | 1.00E+00 | 0.07  | 8.32E-01 | 9.80E-01 |
| <b>AC090617.5</b> | -0.09 | 8.72E-01 | 1.00E+00 | -0.09 | 8.32E-01 | 9.80E-01 |
| <b>ABCC5</b>      | -0.09 | 7.05E-01 | 1.00E+00 | 0.06  | 8.32E-01 | 9.80E-01 |
| <b>AADAC</b>      | 0.81  | 1.80E-01 | 1.00E+00 | 0.13  | 8.32E-01 | 9.80E-01 |
| <b>ATG14</b>      | -0.14 | 5.54E-01 | 1.00E+00 | -0.06 | 8.32E-01 | 9.80E-01 |
| <b>MED9</b>       | 0.05  | 8.52E-01 | 1.00E+00 | -0.05 | 8.33E-01 | 9.80E-01 |
| <b>COLCA1</b>     | 1.02  | 3.86E-01 | 1.00E+00 | 0.39  | 8.33E-01 | 9.80E-01 |
| <b>RANP1</b>      | 0.27  | 8.27E-01 | 1.00E+00 | 0.09  | 8.33E-01 | 9.80E-01 |
| <b>ZNF330</b>     | 0.16  | 5.14E-01 | 1.00E+00 | 0.04  | 8.33E-01 | 9.80E-01 |
| <b>UPF3AP2</b>    | 0.27  | 7.13E-01 | 1.00E+00 | -0.07 | 8.33E-01 | 9.80E-01 |
| <b>COPG1</b>      | -0.02 | 8.93E-01 | 1.00E+00 | -0.07 | 8.33E-01 | 9.80E-01 |
| <b>PCSK2</b>      | -0.19 | 6.25E-01 | 1.00E+00 | 0.12  | 8.33E-01 | 9.80E-01 |
| <b>FTL</b>        | 0.32  | 4.68E-01 | 1.00E+00 | -0.11 | 8.33E-01 | 9.80E-01 |



|                   |        |          |          |       |          |          |
|-------------------|--------|----------|----------|-------|----------|----------|
| <b>GIT1</b>       | -0.27  | 2.11E-01 | 1.00E+00 | -0.10 | 8.33E-01 | 9.80E-01 |
| <b>CFAP74</b>     | -1.46  | 3.04E-01 | 1.00E+00 | 0.23  | 8.33E-01 | 9.80E-01 |
| <b>XG</b>         | 0.32   | 3.80E-01 | 1.00E+00 | -0.08 | 8.33E-01 | 9.80E-01 |
| <b>ZBTB21</b>     | -0.25  | 3.89E-01 | 1.00E+00 | 0.05  | 8.33E-01 | 9.80E-01 |
| <b>TTLL1</b>      | -0.20  | 5.45E-01 | 1.00E+00 | -0.05 | 8.33E-01 | 9.80E-01 |
| <b>KRT8P15</b>    | -0.93  | 7.85E-01 | 1.00E+00 | -0.68 | 8.33E-01 | 9.80E-01 |
| <b>TMEM139</b>    | 0.89   | 2.50E-01 | 1.00E+00 | 0.11  | 8.33E-01 | 9.80E-01 |
| <b>LINC01102</b>  | -3.52  | 2.32E-01 | 1.00E+00 | 0.67  | 8.33E-01 | 9.80E-01 |
| <b>TMEM102</b>    | -0.30  | 3.42E-01 | 1.00E+00 | -0.14 | 8.33E-01 | 9.80E-01 |
| <b>PRKX</b>       | 0.36   | 1.70E-01 | 1.00E+00 | 0.10  | 8.33E-01 | 9.80E-01 |
| <b>FLG</b>        | -0.10  | 8.39E-01 | 1.00E+00 | 0.16  | 8.33E-01 | 9.80E-01 |
| <b>ACER1</b>      | 0.24   | 6.53E-01 | 1.00E+00 | -0.16 | 8.33E-01 | 9.80E-01 |
| <b>G34424</b>     | 0.02   | 9.87E-01 | 1.00E+00 | 0.16  | 8.33E-01 | 9.80E-01 |
| <b>SPG11</b>      | -0.28  | 2.28E-01 | 1.00E+00 | -0.05 | 8.34E-01 | 9.80E-01 |
| <b>HOXA11-AS</b>  | -1.42  | 1.86E-01 | 1.00E+00 | -0.26 | 8.34E-01 | 9.80E-01 |
| <b>AP002812.2</b> | 0.64   | 8.04E-01 | 1.00E+00 | 0.34  | 8.34E-01 | 9.80E-01 |
| <b>CYP27B1</b>    | -0.87  | 3.31E-01 | 1.00E+00 | 0.66  | 8.34E-01 | 9.80E-01 |
| <b>TXNDC11</b>    | -0.21  | 3.30E-01 | 1.00E+00 | 0.10  | 8.34E-01 | 9.80E-01 |
| <b>ZNF570</b>     | 0.04   | 8.87E-01 | 1.00E+00 | 0.06  | 8.34E-01 | 9.80E-01 |
| <b>TPSB2</b>      | 0.67   | 2.36E-01 | 1.00E+00 | 0.12  | 8.34E-01 | 9.80E-01 |
| <b>HINT3</b>      | 0.21   | 3.14E-01 | 1.00E+00 | -0.05 | 8.34E-01 | 9.80E-01 |
| <b>NRIP1</b>      | -0.10  | 7.35E-01 | 1.00E+00 | -0.10 | 8.35E-01 | 9.81E-01 |
| <b>ZFAND5</b>     | 0.00   | 9.93E-01 | 1.00E+00 | -0.09 | 8.35E-01 | 9.81E-01 |
| <b>COPS7B</b>     | 0.02   | 9.17E-01 | 1.00E+00 | -0.04 | 8.35E-01 | 9.81E-01 |
| <b>AC108704.2</b> | 0.30   | 8.56E-01 | 1.00E+00 | -0.21 | 8.35E-01 | 9.81E-01 |
| <b>DIS3</b>       | 0.15   | 3.89E-01 | 1.00E+00 | 0.05  | 8.35E-01 | 9.81E-01 |
| <b>PIFO</b>       | 0.06   | 8.87E-01 | 1.00E+00 | 0.10  | 8.35E-01 | 9.81E-01 |
| <b>SRRM2</b>      | -0.60  | 2.55E-02 | 9.29E-01 | -0.11 | 8.35E-01 | 9.81E-01 |
| <b>KRTAP1-3</b>   | -19.72 | 4.78E-09 | 2.45E-06 | -0.66 | 8.35E-01 | 9.81E-01 |
| <b>CNN2P1</b>     | 3.95   | 1.12E-01 | 1.00E+00 | -0.32 | 8.35E-01 | 9.81E-01 |
| <b>AKAP8</b>      | -0.47  | 4.79E-02 | 1.00E+00 | 0.06  | 8.35E-01 | 9.81E-01 |
| <b>RIMS2</b>      | -2.27  | 1.01E-02 | 6.26E-01 | -0.21 | 8.35E-01 | 9.81E-01 |

|                    |       |          |          |       |          |          |
|--------------------|-------|----------|----------|-------|----------|----------|
| <b>AP002784.2</b>  | -0.56 | 7.11E-01 | 1.00E+00 | 0.09  | 8.35E-01 | 9.81E-01 |
| <b>DIDO1</b>       | -0.25 | 2.63E-01 | 1.00E+00 | -0.05 | 8.35E-01 | 9.81E-01 |
| <b>RPS26P47</b>    | 1.95  | 1.43E-01 | 1.00E+00 | 0.14  | 8.35E-01 | 9.81E-01 |
| <b>RP4-565E6.1</b> | 0.70  | 4.63E-01 | 1.00E+00 | 0.24  | 8.35E-01 | 9.81E-01 |
| <b>RAP1B</b>       | 0.29  | 1.37E-01 | 1.00E+00 | -0.05 | 8.35E-01 | 9.81E-01 |
| <b>GPR75</b>       | 0.11  | 8.62E-01 | 1.00E+00 | 0.14  | 8.35E-01 | 9.81E-01 |
| <b>FUNDC2</b>      | 0.14  | 5.12E-01 | 1.00E+00 | -0.04 | 8.36E-01 | 9.81E-01 |
| <b>COL19A1</b>     | -1.98 | 1.79E-01 | 1.00E+00 | -0.26 | 8.36E-01 | 9.81E-01 |
| <b>SNHG14</b>      | 0.38  | 4.30E-01 | 1.00E+00 | -0.10 | 8.36E-01 | 9.81E-01 |
| <b>AC073254.1</b>  | 0.87  | 9.77E-02 | 1.00E+00 | -0.15 | 8.36E-01 | 9.81E-01 |
| <b>GTF2IRD1</b>    | -0.51 | 1.32E-01 | 1.00E+00 | 0.09  | 8.36E-01 | 9.81E-01 |
| <b>STAT5A</b>      | 0.45  | 1.97E-01 | 1.00E+00 | -0.13 | 8.36E-01 | 9.81E-01 |
| <b>AC046176.1</b>  | -0.49 | 6.13E-01 | 1.00E+00 | -0.09 | 8.36E-01 | 9.81E-01 |
| <b>NHLRC1</b>      | -0.14 | 6.16E-01 | 1.00E+00 | 0.06  | 8.36E-01 | 9.81E-01 |
| <b>TP53</b>        | -0.22 | 4.18E-01 | 1.00E+00 | -0.05 | 8.36E-01 | 9.81E-01 |
| <b>ETNK1</b>       | -0.04 | 9.03E-01 | 1.00E+00 | -0.06 | 8.36E-01 | 9.81E-01 |
| <b>ARHGAP32</b>    | -0.23 | 4.38E-01 | 1.00E+00 | 0.07  | 8.36E-01 | 9.81E-01 |
| <b>AC107032.1</b>  | -0.92 | 3.54E-01 | 1.00E+00 | -0.14 | 8.36E-01 | 9.81E-01 |
| <b>TDRD3</b>       | 0.04  | 8.40E-01 | 1.00E+00 | -0.04 | 8.36E-01 | 9.81E-01 |
| <b>MLEC</b>        | 0.62  | 9.42E-03 | 6.06E-01 | -0.08 | 8.36E-01 | 9.81E-01 |
| <b>G34423</b>      | -1.18 | 8.34E-02 | 1.00E+00 | -0.23 | 8.36E-01 | 9.81E-01 |
| <b>CHST8</b>       | -0.78 | 2.15E-01 | 1.00E+00 | -0.57 | 8.36E-01 | 9.81E-01 |
| <b>GLS2</b>        | 0.85  | 6.90E-01 | 1.00E+00 | -0.18 | 8.36E-01 | 9.81E-01 |
| <b>PTDSS1</b>      | -0.23 | 2.27E-01 | 1.00E+00 | 0.04  | 8.36E-01 | 9.81E-01 |
| <b>MEIS3P1</b>     | 0.14  | 7.53E-01 | 1.00E+00 | -0.51 | 8.36E-01 | 9.81E-01 |
| <b>FAHD2A</b>      | 0.18  | 4.31E-01 | 1.00E+00 | -0.04 | 8.36E-01 | 9.81E-01 |
| <b>AGBL4</b>       | -0.26 | 7.82E-01 | 1.00E+00 | -0.18 | 8.36E-01 | 9.81E-01 |
| <b>CR2</b>         | 2.83  | 4.04E-01 | 1.00E+00 | 0.64  | 8.36E-01 | 9.81E-01 |
| <b>PALM3</b>       | 0.11  | 8.39E-01 | 1.00E+00 | -0.26 | 8.36E-01 | 9.81E-01 |
| <b>C17orf97</b>    | 0.54  | 2.47E-01 | 1.00E+00 | -0.12 | 8.36E-01 | 9.81E-01 |
| <b>PHLDA3</b>      | 0.10  | 7.56E-01 | 1.00E+00 | 0.12  | 8.36E-01 | 9.81E-01 |
| <b>G30143</b>      | -1.88 | 1.61E-01 | 1.00E+00 | -0.25 | 8.36E-01 | 9.81E-01 |

|                   |       |          |          |       |          |          |
|-------------------|-------|----------|----------|-------|----------|----------|
| <b>TCF7</b>       | -0.39 | 9.69E-02 | 1.00E+00 | -0.11 | 8.36E-01 | 9.81E-01 |
| <b>CMA1</b>       | 0.70  | 2.43E-01 | 1.00E+00 | 0.13  | 8.36E-01 | 9.81E-01 |
| <b>TECRP1</b>     | 0.12  | 8.26E-01 | 1.00E+00 | -0.13 | 8.36E-01 | 9.81E-01 |
| <b>MT3</b>        | 0.20  | 9.51E-01 | 1.00E+00 | -0.22 | 8.36E-01 | 9.81E-01 |
| <b>POT1-AS1</b>   | -1.83 | 5.25E-01 | 1.00E+00 | 0.20  | 8.37E-01 | 9.81E-01 |
| <b>FIBP</b>       | -0.26 | 1.40E-01 | 1.00E+00 | -0.05 | 8.37E-01 | 9.81E-01 |
| <b>IGHE</b>       | 0.60  | 8.17E-01 | 1.00E+00 | -0.40 | 8.37E-01 | 9.81E-01 |
| <b>ARHGAP28</b>   | -0.43 | 3.51E-01 | 1.00E+00 | -0.08 | 8.37E-01 | 9.81E-01 |
| <b>AGMO</b>       | 0.82  | 2.54E-01 | 1.00E+00 | -0.17 | 8.37E-01 | 9.81E-01 |
| <b>LMLN</b>       | -0.09 | 8.36E-01 | 1.00E+00 | -0.07 | 8.37E-01 | 9.81E-01 |
| <b>AC109635.5</b> | 1.32  | 4.93E-01 | 1.00E+00 | 0.27  | 8.37E-01 | 9.81E-01 |
| <b>NT5M</b>       | 0.07  | 8.92E-01 | 1.00E+00 | -0.14 | 8.37E-01 | 9.81E-01 |
| <b>G6313</b>      | 0.72  | 1.12E-01 | 1.00E+00 | 0.15  | 8.37E-01 | 9.81E-01 |
| <b>IFT140</b>     | -0.02 | 9.39E-01 | 1.00E+00 | 0.12  | 8.37E-01 | 9.81E-01 |
| <b>HCAR2</b>      | 0.17  | 7.58E-01 | 1.00E+00 | 0.06  | 8.37E-01 | 9.81E-01 |
| <b>AC106869.1</b> | 0.32  | 7.26E-01 | 1.00E+00 | 0.21  | 8.37E-01 | 9.81E-01 |
| <b>PCGF1</b>      | -0.02 | 9.00E-01 | 1.00E+00 | 0.04  | 8.37E-01 | 9.81E-01 |
| <b>TIA1</b>       | -0.24 | 4.19E-01 | 1.00E+00 | 0.05  | 8.38E-01 | 9.81E-01 |
| <b>THAP9-AS1</b>  | -0.26 | 3.49E-01 | 1.00E+00 | -0.06 | 8.38E-01 | 9.81E-01 |
| <b>SLC25A24</b>   | 0.31  | 3.24E-01 | 1.00E+00 | -0.05 | 8.38E-01 | 9.81E-01 |
| <b>AL590705.3</b> | -0.77 | 4.57E-01 | 1.00E+00 | -0.11 | 8.38E-01 | 9.81E-01 |
| <b>PSMD11</b>     | 0.00  | 9.88E-01 | 1.00E+00 | -0.05 | 8.38E-01 | 9.81E-01 |
| <b>AC099778.1</b> | -0.76 | 3.02E-01 | 1.00E+00 | 0.17  | 8.38E-01 | 9.81E-01 |
| <b>CKS1BP2</b>    | -2.87 | 3.99E-01 | 1.00E+00 | -0.12 | 8.38E-01 | 9.81E-01 |
| <b>MOCS1</b>      | 0.25  | 4.96E-01 | 1.00E+00 | -0.12 | 8.38E-01 | 9.81E-01 |
| <b>AL022097.1</b> | -1.39 | 4.96E-01 | 1.00E+00 | -0.26 | 8.38E-01 | 9.81E-01 |
| <b>AP000350.6</b> | 2.62  | 3.19E-01 | 1.00E+00 | -0.33 | 8.38E-01 | 9.81E-01 |
| <b>RBBP5</b>      | 0.26  | 3.47E-01 | 1.00E+00 | 0.04  | 8.38E-01 | 9.81E-01 |
| <b>C1orf134</b>   | 0.26  | 5.21E-01 | 1.00E+00 | 0.10  | 8.38E-01 | 9.81E-01 |
| <b>AC156455.1</b> | -1.13 | 2.97E-01 | 1.00E+00 | 0.19  | 8.38E-01 | 9.81E-01 |
| <b>SLC25A13</b>   | -0.01 | 9.63E-01 | 1.00E+00 | 0.04  | 8.38E-01 | 9.81E-01 |
| <b>PRPF40A</b>    | -0.06 | 8.14E-01 | 1.00E+00 | -0.05 | 8.38E-01 | 9.81E-01 |

|                    |       |          |          |       |          |          |
|--------------------|-------|----------|----------|-------|----------|----------|
| <b>TMEM185A</b>    | 0.09  | 6.49E-01 | 1.00E+00 | 0.06  | 8.38E-01 | 9.81E-01 |
| <b>HEATR1</b>      | 0.08  | 7.43E-01 | 1.00E+00 | 0.09  | 8.38E-01 | 9.81E-01 |
| <b>NCCRP1</b>      | -0.15 | 8.03E-01 | 1.00E+00 | -0.15 | 8.38E-01 | 9.81E-01 |
| <b>AL139393.2</b>  | 0.18  | 5.93E-01 | 1.00E+00 | 0.14  | 8.38E-01 | 9.81E-01 |
| <b>C5orf56</b>     | 0.04  | 9.46E-01 | 1.00E+00 | 0.10  | 8.38E-01 | 9.81E-01 |
| <b>AC007537.1</b>  | 2.32  | 1.22E-01 | 1.00E+00 | 0.14  | 8.38E-01 | 9.81E-01 |
| <b>AC100814.1</b>  | -0.72 | 6.16E-01 | 1.00E+00 | -0.17 | 8.38E-01 | 9.81E-01 |
| <b>NRBF2</b>       | 0.06  | 7.76E-01 | 1.00E+00 | -0.06 | 8.38E-01 | 9.81E-01 |
| <b>CLOCK</b>       | 0.03  | 9.15E-01 | 1.00E+00 | -0.04 | 8.38E-01 | 9.81E-01 |
| <b>AC004943.2</b>  | 0.12  | 8.00E-01 | 1.00E+00 | 0.10  | 8.38E-01 | 9.81E-01 |
| <b>PRKAG3</b>      | -0.26 | 8.79E-01 | 1.00E+00 | -0.31 | 8.38E-01 | 9.81E-01 |
| <b>STARD13-AS</b>  | 1.91  | 1.53E-01 | 1.00E+00 | -0.14 | 8.38E-01 | 9.81E-01 |
| <b>GAS6</b>        | 0.08  | 7.76E-01 | 1.00E+00 | -0.08 | 8.38E-01 | 9.81E-01 |
| <b>ANO6</b>        | 0.47  | 1.33E-01 | 1.00E+00 | -0.08 | 8.38E-01 | 9.81E-01 |
| <b>BTBD7P1</b>     | -1.07 | 4.22E-01 | 1.00E+00 | 0.33  | 8.38E-01 | 9.81E-01 |
| <b>CACNA1H</b>     | -0.55 | 6.06E-02 | 1.00E+00 | -0.16 | 8.38E-01 | 9.81E-01 |
| <b>AC080013.4</b>  | 0.67  | 2.26E-01 | 1.00E+00 | -0.13 | 8.39E-01 | 9.81E-01 |
| <b>TSP0AP1-AS1</b> | 1.27  | 3.06E-01 | 1.00E+00 | -0.22 | 8.39E-01 | 9.81E-01 |
| <b>BBX</b>         | 0.04  | 8.67E-01 | 1.00E+00 | -0.03 | 8.39E-01 | 9.81E-01 |
| <b>CDKN3</b>       | 0.14  | 7.33E-01 | 1.00E+00 | -0.10 | 8.39E-01 | 9.81E-01 |
| <b>TMC3</b>        | -0.22 | 8.90E-01 | 1.00E+00 | 0.25  | 8.39E-01 | 9.81E-01 |
| <b>DVL2</b>        | -0.17 | 4.08E-01 | 1.00E+00 | -0.08 | 8.39E-01 | 9.81E-01 |
| <b>AL021878.2</b>  | 0.82  | 5.73E-01 | 1.00E+00 | 0.20  | 8.39E-01 | 9.81E-01 |
| <b>AC078962.2</b>  | -0.26 | 8.06E-01 | 1.00E+00 | -0.17 | 8.39E-01 | 9.81E-01 |
| <b>AC008443.4</b>  | -2.59 | 4.49E-01 | 1.00E+00 | -0.15 | 8.39E-01 | 9.81E-01 |
| <b>LINC02227</b>   | 2.53  | 4.56E-01 | 1.00E+00 | 0.23  | 8.39E-01 | 9.81E-01 |
| <b>AC098847.1</b>  | 0.21  | 7.60E-01 | 1.00E+00 | 0.18  | 8.39E-01 | 9.81E-01 |
| <b>AL035661.1</b>  | -0.80 | 8.18E-01 | 1.00E+00 | -0.18 | 8.39E-01 | 9.81E-01 |
| <b>RPS6KA2</b>     | 0.36  | 2.05E-01 | 1.00E+00 | -0.09 | 8.39E-01 | 9.81E-01 |
| <b>SNORD104</b>    | 1.42  | 3.83E-01 | 1.00E+00 | 0.22  | 8.39E-01 | 9.81E-01 |
| <b>AC005165.1</b>  | -1.88 | 5.71E-01 | 1.00E+00 | -0.22 | 8.39E-01 | 9.81E-01 |
| <b>TMEM217</b>     | -0.03 | 9.56E-01 | 1.00E+00 | 0.14  | 8.39E-01 | 9.81E-01 |

|                   |       |          |          |       |          |          |
|-------------------|-------|----------|----------|-------|----------|----------|
| <b>AC025857.2</b> | -2.22 | 1.90E-01 | 1.00E+00 | 0.16  | 8.39E-01 | 9.81E-01 |
| <b>RNF32</b>      | 0.00  | 9.95E-01 | 1.00E+00 | 0.10  | 8.39E-01 | 9.81E-01 |
| <b>TMC1</b>       | -0.15 | 8.40E-01 | 1.00E+00 | -0.16 | 8.39E-01 | 9.81E-01 |
| <b>C5orf22</b>    | -0.26 | 3.24E-01 | 1.00E+00 | 0.06  | 8.39E-01 | 9.81E-01 |
| <b>NUP205</b>     | -0.02 | 9.27E-01 | 1.00E+00 | -0.07 | 8.39E-01 | 9.81E-01 |
| <b>MLKL</b>       | -0.07 | 8.80E-01 | 1.00E+00 | -0.49 | 8.39E-01 | 9.81E-01 |
| <b>ESPN</b>       | -0.62 | 2.25E-01 | 1.00E+00 | -0.14 | 8.39E-01 | 9.81E-01 |
| <b>DHRS4L1</b>    | -1.28 | 4.12E-01 | 1.00E+00 | -0.18 | 8.39E-01 | 9.81E-01 |
| <b>CLIC4</b>      | 0.25  | 5.39E-01 | 1.00E+00 | 0.07  | 8.40E-01 | 9.81E-01 |
| <b>ZNF426</b>     | -0.16 | 4.41E-01 | 1.00E+00 | 0.04  | 8.40E-01 | 9.81E-01 |
| <b>USP28</b>      | 0.30  | 2.35E-01 | 1.00E+00 | -0.08 | 8.40E-01 | 9.81E-01 |
| <b>INSYN1-AS1</b> | 0.65  | 5.55E-01 | 1.00E+00 | 0.27  | 8.40E-01 | 9.81E-01 |
| <b>AC008243.1</b> | -0.13 | 9.69E-01 | 1.00E+00 | 0.24  | 8.40E-01 | 9.81E-01 |
| <b>FXN</b>        | -0.22 | 4.99E-01 | 1.00E+00 | -0.05 | 8.40E-01 | 9.81E-01 |
| <b>KCNH3</b>      | -1.07 | 1.28E-01 | 1.00E+00 | 0.28  | 8.40E-01 | 9.81E-01 |
| <b>IGFL2</b>      | 0.05  | 9.16E-01 | 1.00E+00 | 0.15  | 8.40E-01 | 9.81E-01 |
| <b>EML1</b>       | -0.05 | 8.47E-01 | 1.00E+00 | 0.08  | 8.40E-01 | 9.81E-01 |
| <b>AMN</b>        | -0.84 | 9.03E-02 | 1.00E+00 | -0.19 | 8.40E-01 | 9.81E-01 |
| <b>GFRA3</b>      | -0.34 | 5.15E-01 | 1.00E+00 | 0.10  | 8.40E-01 | 9.81E-01 |
| <b>SH3GL1</b>     | -0.18 | 6.06E-01 | 1.00E+00 | 0.08  | 8.40E-01 | 9.81E-01 |
| <b>RPL26P30</b>   | 0.02  | 9.89E-01 | 1.00E+00 | 0.14  | 8.40E-01 | 9.81E-01 |
| <b>CCNL2</b>      | -0.13 | 7.01E-01 | 1.00E+00 | -0.07 | 8.40E-01 | 9.81E-01 |
| <b>AC008494.3</b> | -1.51 | 3.66E-01 | 1.00E+00 | -0.14 | 8.40E-01 | 9.81E-01 |
| <b>TOMM40</b>     | -0.37 | 1.51E-01 | 1.00E+00 | -0.11 | 8.40E-01 | 9.81E-01 |
| <b>BLCAP</b>      | 0.23  | 2.01E-01 | 1.00E+00 | -0.04 | 8.40E-01 | 9.81E-01 |
| <b>BIRC2</b>      | 0.22  | 3.50E-01 | 1.00E+00 | 0.03  | 8.40E-01 | 9.81E-01 |
| <b>HPS1</b>       | -0.11 | 6.10E-01 | 1.00E+00 | 0.07  | 8.40E-01 | 9.81E-01 |
| <b>HOXB5</b>      | 0.75  | 3.41E-01 | 1.00E+00 | 0.14  | 8.40E-01 | 9.81E-01 |
| <b>OLAH</b>       | 0.68  | 6.91E-01 | 1.00E+00 | -0.24 | 8.40E-01 | 9.81E-01 |
| <b>AC090136.3</b> | 0.39  | 8.00E-01 | 1.00E+00 | 0.25  | 8.40E-01 | 9.81E-01 |
| <b>C22orf15</b>   | 1.30  | 3.96E-01 | 1.00E+00 | -0.31 | 8.41E-01 | 9.81E-01 |
| <b>FOXO3</b>      | -0.05 | 8.85E-01 | 1.00E+00 | -0.06 | 8.41E-01 | 9.81E-01 |

|                    |       |          |          |       |          |          |
|--------------------|-------|----------|----------|-------|----------|----------|
| <b>AL353704.1</b>  | 0.97  | 2.90E-01 | 1.00E+00 | 0.21  | 8.41E-01 | 9.81E-01 |
| <b>FPGT-TNNI3K</b> | 0.62  | 6.95E-01 | 1.00E+00 | -0.55 | 8.41E-01 | 9.81E-01 |
| <b>PLEKHH3</b>     | -0.35 | 1.92E-01 | 1.00E+00 | 0.13  | 8.41E-01 | 9.81E-01 |
| <b>EIF3J</b>       | 0.08  | 7.05E-01 | 1.00E+00 | 0.05  | 8.41E-01 | 9.81E-01 |
| <b>ENTPD1-AS1</b>  | -0.14 | 6.83E-01 | 1.00E+00 | 0.06  | 8.41E-01 | 9.81E-01 |
| <b>TRIM47</b>      | -0.55 | 2.55E-02 | 9.29E-01 | 0.09  | 8.41E-01 | 9.81E-01 |
| <b>ABCB6</b>       | 0.82  | 8.00E-01 | 1.00E+00 | 0.15  | 8.41E-01 | 9.81E-01 |
| <b>LINC01504</b>   | -0.12 | 8.64E-01 | 1.00E+00 | 0.15  | 8.41E-01 | 9.81E-01 |
| <b>P2RY13</b>      | 0.56  | 3.03E-01 | 1.00E+00 | 0.10  | 8.41E-01 | 9.81E-01 |
| <b>TSPEAR</b>      | -1.25 | 1.13E-01 | 1.00E+00 | -0.21 | 8.41E-01 | 9.81E-01 |
| <b>BX679664.3</b>  | 0.03  | 9.42E-01 | 1.00E+00 | -0.08 | 8.41E-01 | 9.81E-01 |
| <b>AC004241.1</b>  | 0.89  | 3.93E-01 | 1.00E+00 | -0.11 | 8.41E-01 | 9.81E-01 |
| <b>AC009245.1</b>  | -0.22 | 7.23E-01 | 1.00E+00 | 0.17  | 8.41E-01 | 9.81E-01 |
| <b>FCER2</b>       | 0.00  | 9.98E-01 | 1.00E+00 | 0.56  | 8.41E-01 | 9.81E-01 |
| <b>DDX19A</b>      | 0.27  | 2.78E-01 | 1.00E+00 | 0.03  | 8.41E-01 | 9.81E-01 |
| <b>JMJD1C-AS1</b>  | 1.32  | 2.68E-01 | 1.00E+00 | -0.15 | 8.41E-01 | 9.81E-01 |
| <b>CLCC1</b>       | 0.31  | 2.76E-01 | 1.00E+00 | -0.05 | 8.41E-01 | 9.81E-01 |
| <b>FAM162B</b>     | 0.32  | 5.31E-01 | 1.00E+00 | 0.12  | 8.42E-01 | 9.81E-01 |
| <b>TBC1D25</b>     | -0.17 | 4.82E-01 | 1.00E+00 | -0.06 | 8.42E-01 | 9.81E-01 |
| <b>STEAP2</b>      | 0.69  | 9.41E-02 | 1.00E+00 | -0.08 | 8.42E-01 | 9.81E-01 |
| <b>OVOL1</b>       | -0.91 | 2.18E-01 | 1.00E+00 | -0.15 | 8.42E-01 | 9.81E-01 |
| <b>LINC00908</b>   | 0.87  | 3.28E-02 | 1.00E+00 | 0.14  | 8.42E-01 | 9.81E-01 |
| <b>MRPS24</b>      | 0.44  | 7.79E-01 | 1.00E+00 | 0.17  | 8.42E-01 | 9.81E-01 |
| <b>ALDH1A1</b>     | 0.68  | 1.90E-01 | 1.00E+00 | 0.10  | 8.42E-01 | 9.81E-01 |
| <b>RN7SL208P</b>   | 0.02  | 9.88E-01 | 1.00E+00 | 0.17  | 8.42E-01 | 9.81E-01 |
| <b>AP000808.2</b>  | -0.16 | 8.84E-01 | 1.00E+00 | -0.25 | 8.42E-01 | 9.81E-01 |
| <b>TLCD2</b>       | 0.09  | 8.73E-01 | 1.00E+00 | 0.09  | 8.42E-01 | 9.81E-01 |
| <b>CERNA1</b>      | -1.19 | 4.04E-01 | 1.00E+00 | 0.16  | 8.42E-01 | 9.81E-01 |
| <b>BTAF1</b>       | 0.09  | 8.06E-01 | 1.00E+00 | 0.06  | 8.42E-01 | 9.81E-01 |
| <b>APEX2</b>       | -0.14 | 5.66E-01 | 1.00E+00 | 0.04  | 8.42E-01 | 9.81E-01 |
| <b>HMG2P15</b>     | 0.03  | 9.74E-01 | 1.00E+00 | 0.15  | 8.42E-01 | 9.81E-01 |
| <b>NUDT19</b>      | -0.16 | 4.79E-01 | 1.00E+00 | 0.07  | 8.42E-01 | 9.81E-01 |

|                     |       |          |          |       |          |          |
|---------------------|-------|----------|----------|-------|----------|----------|
| <b>RP11-292B8.1</b> | -0.02 | 9.69E-01 | 1.00E+00 | 0.07  | 8.42E-01 | 9.81E-01 |
| <b>BICDL1</b>       | -0.14 | 7.60E-01 | 1.00E+00 | -0.12 | 8.42E-01 | 9.81E-01 |
| <b>TBL1XR1</b>      | 0.42  | 5.96E-02 | 1.00E+00 | -0.08 | 8.42E-01 | 9.81E-01 |
| <b>VSIR</b>         | 0.13  | 6.04E-01 | 1.00E+00 | 0.05  | 8.42E-01 | 9.81E-01 |
| <b>SERP2</b>        | -0.15 | 7.53E-01 | 1.00E+00 | -0.14 | 8.42E-01 | 9.81E-01 |
| <b>AC105942.1</b>   | 0.08  | 8.84E-01 | 1.00E+00 | -0.17 | 8.42E-01 | 9.81E-01 |
| <b>CD27-AS1</b>     | 0.75  | 5.44E-02 | 1.00E+00 | -0.06 | 8.42E-01 | 9.81E-01 |
| <b>PLEKHN1</b>      | -0.09 | 8.53E-01 | 1.00E+00 | 0.12  | 8.42E-01 | 9.81E-01 |
| <b>TYW5</b>         | 0.55  | 9.74E-02 | 1.00E+00 | 0.06  | 8.43E-01 | 9.81E-01 |
| <b>HAR1A</b>        | 0.86  | 1.72E-01 | 1.00E+00 | 0.21  | 8.43E-01 | 9.81E-01 |
| <b>STX17-AS1</b>    | -0.14 | 9.51E-01 | 1.00E+00 | -0.15 | 8.43E-01 | 9.81E-01 |
| <b>TOB1</b>         | -0.40 | 2.75E-01 | 1.00E+00 | 0.09  | 8.43E-01 | 9.81E-01 |
| <b>POLG2</b>        | 0.30  | 5.22E-01 | 1.00E+00 | 0.09  | 8.43E-01 | 9.81E-01 |
| <b>ZNF134</b>       | 0.03  | 8.82E-01 | 1.00E+00 | -0.04 | 8.43E-01 | 9.81E-01 |
| <b>AC092364.2</b>   | 1.25  | 7.19E-01 | 1.00E+00 | -0.33 | 8.43E-01 | 9.81E-01 |
| <b>CEP55</b>        | -0.11 | 7.52E-01 | 1.00E+00 | -0.15 | 8.43E-01 | 9.81E-01 |
| <b>G26738</b>       | 0.36  | 8.50E-01 | 1.00E+00 | 0.31  | 8.43E-01 | 9.81E-01 |
| <b>PMPCB</b>        | 0.03  | 8.97E-01 | 1.00E+00 | -0.04 | 8.43E-01 | 9.81E-01 |
| <b>G43621</b>       | -1.56 | 6.20E-01 | 1.00E+00 | -0.64 | 8.43E-01 | 9.81E-01 |
| <b>BSG</b>          | -0.08 | 6.90E-01 | 1.00E+00 | -0.03 | 8.43E-01 | 9.81E-01 |
| <b>UBA1</b>         | -0.13 | 4.49E-01 | 1.00E+00 | 0.07  | 8.43E-01 | 9.81E-01 |
| <b>CCDC107</b>      | 0.27  | 4.66E-01 | 1.00E+00 | -0.10 | 8.43E-01 | 9.81E-01 |
| <b>KANK2</b>        | 0.12  | 7.84E-01 | 1.00E+00 | 0.10  | 8.43E-01 | 9.81E-01 |
| <b>ALDH3B2</b>      | -0.54 | 2.97E-01 | 1.00E+00 | 0.12  | 8.43E-01 | 9.81E-01 |
| <b>ZNF546</b>       | 1.02  | 1.92E-01 | 1.00E+00 | 0.13  | 8.43E-01 | 9.81E-01 |
| <b>ANAPC7</b>       | -0.12 | 5.24E-01 | 1.00E+00 | -0.03 | 8.43E-01 | 9.81E-01 |
| <b>NXF3</b>         | -2.70 | 1.69E-01 | 1.00E+00 | -0.33 | 8.43E-01 | 9.81E-01 |
| <b>SERPINA5</b>     | 0.41  | 5.81E-01 | 1.00E+00 | -0.15 | 8.43E-01 | 9.81E-01 |
| <b>G42897</b>       | 1.17  | 2.66E-01 | 1.00E+00 | 0.12  | 8.43E-01 | 9.81E-01 |
| <b>CPNE2</b>        | 0.21  | 6.14E-01 | 1.00E+00 | 0.11  | 8.43E-01 | 9.81E-01 |
| <b>ZNF836</b>       | 0.05  | 8.86E-01 | 1.00E+00 | -0.10 | 8.43E-01 | 9.81E-01 |
| <b>HYAL1</b>        | -0.08 | 7.88E-01 | 1.00E+00 | -0.05 | 8.43E-01 | 9.81E-01 |

|              |       |          |          |       |          |          |
|--------------|-------|----------|----------|-------|----------|----------|
| RP9P         | 0.27  | 3.92E-01 | 1.00E+00 | 0.07  | 8.44E-01 | 9.81E-01 |
| IVD          | 0.41  | 4.44E-01 | 1.00E+00 | 0.08  | 8.44E-01 | 9.81E-01 |
| LINC00894    | 0.47  | 7.11E-01 | 1.00E+00 | 0.18  | 8.44E-01 | 9.81E-01 |
| AC009812.1   | -0.86 | 2.26E-01 | 1.00E+00 | 0.12  | 8.44E-01 | 9.81E-01 |
| AL513321.2   | -0.42 | 6.14E-01 | 1.00E+00 | -0.22 | 8.44E-01 | 9.81E-01 |
| ARL9         | -0.37 | 1.63E-01 | 1.00E+00 | 0.10  | 8.44E-01 | 9.81E-01 |
| XLOC_001061  | 2.12  | 1.70E-01 | 1.00E+00 | -0.22 | 8.44E-01 | 9.81E-01 |
| AGPAT3       | 0.13  | 6.49E-01 | 1.00E+00 | 0.09  | 8.44E-01 | 9.81E-01 |
| DSTNP1       | 0.46  | 4.97E-01 | 1.00E+00 | 0.10  | 8.44E-01 | 9.81E-01 |
| WDR45B       | 0.13  | 5.30E-01 | 1.00E+00 | 0.03  | 8.44E-01 | 9.81E-01 |
| AL117335.1   | 0.47  | 4.90E-01 | 1.00E+00 | -0.16 | 8.44E-01 | 9.81E-01 |
| AL353596.1   | 1.43  | 2.26E-01 | 1.00E+00 | 0.31  | 8.44E-01 | 9.81E-01 |
| ARHGAP31-AS1 | 0.95  | 3.36E-01 | 1.00E+00 | -0.17 | 8.44E-01 | 9.81E-01 |
| LINC01719    | 0.49  | 4.07E-01 | 1.00E+00 | 0.20  | 8.44E-01 | 9.81E-01 |
| LRRN1        | -0.63 | 5.57E-02 | 1.00E+00 | -0.10 | 8.44E-01 | 9.81E-01 |
| TAF1A-AS1    | 2.04  | 2.68E-01 | 1.00E+00 | 0.21  | 8.44E-01 | 9.81E-01 |
| NWD2         | -0.03 | 9.64E-01 | 1.00E+00 | 0.18  | 8.44E-01 | 9.81E-01 |
| TTC21B       | 0.51  | 1.19E-01 | 1.00E+00 | -0.06 | 8.44E-01 | 9.81E-01 |
| AL136040.1   | 0.10  | 8.68E-01 | 1.00E+00 | 0.12  | 8.44E-01 | 9.81E-01 |
| EMC4         | -0.08 | 6.11E-01 | 1.00E+00 | -0.06 | 8.44E-01 | 9.81E-01 |
| PPWD1        | 0.28  | 1.70E-01 | 1.00E+00 | -0.05 | 8.45E-01 | 9.81E-01 |
| AL022344.2   | -0.04 | 9.29E-01 | 1.00E+00 | 0.17  | 8.45E-01 | 9.81E-01 |
| APOBEC2      | -0.56 | 5.97E-01 | 1.00E+00 | -0.18 | 8.45E-01 | 9.81E-01 |
| GAP43        | 0.35  | 9.12E-01 | 1.00E+00 | 0.36  | 8.45E-01 | 9.81E-01 |
| UTP18        | -0.09 | 7.98E-01 | 1.00E+00 | 0.05  | 8.45E-01 | 9.81E-01 |
| RPL29P11     | 0.38  | 3.32E-01 | 1.00E+00 | -0.09 | 8.45E-01 | 9.81E-01 |
| AC002059.2   | -2.17 | 3.26E-01 | 1.00E+00 | -0.19 | 8.45E-01 | 9.81E-01 |
| GRIK5        | -0.15 | 7.78E-01 | 1.00E+00 | 0.22  | 8.45E-01 | 9.81E-01 |
| LRRC37A3     | -0.33 | 3.68E-01 | 1.00E+00 | 0.11  | 8.45E-01 | 9.81E-01 |
| RASGRP1      | -0.39 | 4.07E-01 | 1.00E+00 | -0.12 | 8.45E-01 | 9.81E-01 |
| JAM3         | 0.09  | 7.99E-01 | 1.00E+00 | 0.09  | 8.45E-01 | 9.81E-01 |
| PIK3C3       | 0.10  | 6.42E-01 | 1.00E+00 | 0.04  | 8.45E-01 | 9.81E-01 |



|                   |       |          |          |       |          |          |
|-------------------|-------|----------|----------|-------|----------|----------|
| <b>ASAH2B</b>     | 0.35  | 3.48E-01 | 1.00E+00 | 0.06  | 8.45E-01 | 9.81E-01 |
| <b>ZNF137P</b>    | -0.15 | 8.22E-01 | 1.00E+00 | 0.22  | 8.45E-01 | 9.81E-01 |
| <b>HOXC13-AS</b>  | 0.23  | 5.97E-01 | 1.00E+00 | -0.10 | 8.45E-01 | 9.81E-01 |
| <b>CTBP1-DT</b>   | -0.37 | 7.74E-02 | 1.00E+00 | -0.09 | 8.45E-01 | 9.81E-01 |
| <b>KHDRBS3</b>    | -0.21 | 5.88E-01 | 1.00E+00 | -0.13 | 8.45E-01 | 9.81E-01 |
| <b>AZI2</b>       | 0.04  | 8.64E-01 | 1.00E+00 | -0.05 | 8.45E-01 | 9.81E-01 |
| <b>LINC02026</b>  | -0.43 | 9.02E-01 | 1.00E+00 | 0.19  | 8.45E-01 | 9.81E-01 |
| <b>LRRC37A11P</b> | 0.07  | 8.37E-01 | 1.00E+00 | 0.13  | 8.45E-01 | 9.81E-01 |
| <b>ADAMTS15</b>   | 0.78  | 3.15E-01 | 1.00E+00 | 0.13  | 8.45E-01 | 9.81E-01 |
| <b>DLC1</b>       | 0.12  | 7.13E-01 | 1.00E+00 | 0.10  | 8.45E-01 | 9.81E-01 |
| <b>JRKL</b>       | 0.10  | 7.57E-01 | 1.00E+00 | 0.05  | 8.45E-01 | 9.81E-01 |
| <b>LRCH4</b>      | -0.07 | 7.13E-01 | 1.00E+00 | 0.19  | 8.45E-01 | 9.81E-01 |
| <b>GPAT2P1</b>    | -3.40 | 9.88E-02 | 1.00E+00 | -0.19 | 8.45E-01 | 9.81E-01 |
| <b>PRKD2</b>      | -0.35 | 1.77E-01 | 1.00E+00 | 0.09  | 8.46E-01 | 9.81E-01 |
| <b>KLHL26</b>     | -0.34 | 1.38E-01 | 1.00E+00 | 0.09  | 8.46E-01 | 9.81E-01 |
| <b>NUP188</b>     | -0.07 | 7.06E-01 | 1.00E+00 | -0.08 | 8.46E-01 | 9.81E-01 |
| <b>HNRNPH2</b>    | -0.09 | 6.86E-01 | 1.00E+00 | -0.03 | 8.46E-01 | 9.81E-01 |
| <b>AC093495.1</b> | 2.54  | 7.74E-04 | 1.37E-01 | -0.22 | 8.46E-01 | 9.81E-01 |
| <b>BACH2</b>      | 0.05  | 9.00E-01 | 1.00E+00 | 0.09  | 8.46E-01 | 9.81E-01 |
| <b>SEC24A</b>     | 0.21  | 3.18E-01 | 1.00E+00 | 0.05  | 8.46E-01 | 9.81E-01 |
| <b>ZNF239</b>     | 0.65  | 3.40E-01 | 1.00E+00 | -0.12 | 8.46E-01 | 9.81E-01 |
| <b>AL359232.1</b> | 0.03  | 9.76E-01 | 1.00E+00 | -0.12 | 8.46E-01 | 9.81E-01 |
| <b>SLC25A6</b>    | -1.83 | 5.95E-01 | 1.00E+00 | -0.12 | 8.46E-01 | 9.81E-01 |
| <b>COPE</b>       | -0.26 | 2.63E-01 | 1.00E+00 | 0.06  | 8.46E-01 | 9.81E-01 |
| <b>G25497</b>     | 0.35  | 8.53E-01 | 1.00E+00 | -0.21 | 8.46E-01 | 9.81E-01 |
| <b>QTRT1</b>      | -0.39 | 1.04E-01 | 1.00E+00 | -0.04 | 8.46E-01 | 9.81E-01 |
| <b>ANKRD13B</b>   | -0.50 | 1.90E-01 | 1.00E+00 | 0.10  | 8.46E-01 | 9.81E-01 |
| <b>UBE2C</b>      | -0.06 | 8.57E-01 | 1.00E+00 | -0.10 | 8.46E-01 | 9.81E-01 |
| <b>AC126755.1</b> | 0.22  | 7.03E-01 | 1.00E+00 | 0.28  | 8.46E-01 | 9.81E-01 |
| <b>AC024075.2</b> | 0.05  | 9.29E-01 | 1.00E+00 | 0.10  | 8.46E-01 | 9.81E-01 |
| <b>RASSF1</b>     | 0.24  | 3.70E-01 | 1.00E+00 | 0.05  | 8.46E-01 | 9.81E-01 |
| <b>AC005162.2</b> | -2.98 | 1.04E-01 | 1.00E+00 | 0.28  | 8.46E-01 | 9.81E-01 |

|                   |       |          |          |       |          |          |
|-------------------|-------|----------|----------|-------|----------|----------|
| <b>ARFGAP3</b>    | -0.01 | 9.68E-01 | 1.00E+00 | 0.04  | 8.46E-01 | 9.81E-01 |
| <b>TAF1C</b>      | -0.11 | 6.61E-01 | 1.00E+00 | 0.11  | 8.46E-01 | 9.81E-01 |
| <b>TNNT2</b>      | 0.31  | 6.18E-01 | 1.00E+00 | 0.12  | 8.46E-01 | 9.81E-01 |
| <b>AL359094.1</b> | -0.28 | 8.96E-01 | 1.00E+00 | 0.17  | 8.46E-01 | 9.81E-01 |
| <b>AC025449.1</b> | 0.18  | 8.32E-01 | 1.00E+00 | 0.11  | 8.46E-01 | 9.81E-01 |
| <b>AC116535.1</b> | -0.37 | 7.44E-01 | 1.00E+00 | 0.11  | 8.46E-01 | 9.81E-01 |
| <b>AL031283.1</b> | -3.07 | 2.65E-01 | 1.00E+00 | 0.26  | 8.46E-01 | 9.81E-01 |
| <b>RHOU</b>       | 0.19  | 5.54E-01 | 1.00E+00 | 0.12  | 8.47E-01 | 9.81E-01 |
| <b>SMARCA1</b>    | 0.06  | 8.56E-01 | 1.00E+00 | -0.05 | 8.47E-01 | 9.81E-01 |
| <b>AC008752.3</b> | 1.62  | 2.54E-01 | 1.00E+00 | 0.24  | 8.47E-01 | 9.81E-01 |
| <b>ZNF703</b>     | -0.34 | 3.88E-01 | 1.00E+00 | 0.10  | 8.47E-01 | 9.81E-01 |
| <b>VWA5A</b>      | 0.17  | 3.98E-01 | 1.00E+00 | 0.05  | 8.47E-01 | 9.81E-01 |
| <b>AC106886.4</b> | -0.19 | 7.97E-01 | 1.00E+00 | 0.22  | 8.47E-01 | 9.81E-01 |
| <b>NCKIPSD</b>    | 0.10  | 6.04E-01 | 1.00E+00 | 0.07  | 8.47E-01 | 9.81E-01 |
| <b>RPL7P23</b>    | 0.21  | 7.13E-01 | 1.00E+00 | 0.18  | 8.47E-01 | 9.81E-01 |
| <b>UBXN2B</b>     | 0.14  | 5.18E-01 | 1.00E+00 | -0.05 | 8.47E-01 | 9.81E-01 |
| <b>AL158207.1</b> | -0.25 | 7.16E-01 | 1.00E+00 | 0.11  | 8.47E-01 | 9.81E-01 |
| <b>TCAM1P</b>     | 0.37  | 7.43E-01 | 1.00E+00 | -0.62 | 8.47E-01 | 9.81E-01 |
| <b>AL049647.1</b> | 0.27  | 8.77E-01 | 1.00E+00 | 0.23  | 8.47E-01 | 9.81E-01 |
| <b>SLC44A4</b>    | -0.39 | 6.03E-01 | 1.00E+00 | -0.11 | 8.47E-01 | 9.81E-01 |
| <b>SERPINB7</b>   | 0.53  | 3.35E-01 | 1.00E+00 | 0.14  | 8.47E-01 | 9.81E-01 |
| <b>IGHV3-73</b>   | 1.49  | 6.64E-01 | 1.00E+00 | 0.62  | 8.47E-01 | 9.81E-01 |
| <b>IMPDH2</b>     | -0.27 | 3.43E-01 | 1.00E+00 | 0.04  | 8.47E-01 | 9.81E-01 |
| <b>INMT</b>       | 0.56  | 4.00E-01 | 1.00E+00 | -0.09 | 8.47E-01 | 9.81E-01 |
| <b>OGFOD1</b>     | -0.15 | 3.85E-01 | 1.00E+00 | 0.03  | 8.47E-01 | 9.81E-01 |
| <b>VIT</b>        | 0.45  | 2.53E-01 | 1.00E+00 | 0.09  | 8.48E-01 | 9.81E-01 |
| <b>SLC35B4</b>    | 0.30  | 3.98E-01 | 1.00E+00 | 0.07  | 8.48E-01 | 9.81E-01 |
| <b>AC107959.1</b> | 0.79  | 6.18E-01 | 1.00E+00 | -0.12 | 8.48E-01 | 9.81E-01 |
| <b>KRTAP5-5</b>   | 0.82  | 7.58E-01 | 1.00E+00 | -0.62 | 8.48E-01 | 9.81E-01 |
| <b>AK1</b>        | -0.04 | 9.13E-01 | 1.00E+00 | 0.08  | 8.48E-01 | 9.81E-01 |
| <b>AL138689.1</b> | -3.69 | 1.34E-01 | 1.00E+00 | -0.24 | 8.48E-01 | 9.81E-01 |
| <b>KRTAP5-7</b>   | -1.48 | 5.52E-01 | 1.00E+00 | -0.62 | 8.48E-01 | 9.81E-01 |

|                    |       |          |          |       |          |          |
|--------------------|-------|----------|----------|-------|----------|----------|
| <b>CORO1C</b>      | 0.14  | 5.85E-01 | 1.00E+00 | -0.05 | 8.48E-01 | 9.81E-01 |
| <b>LINC00921</b>   | -0.06 | 9.06E-01 | 1.00E+00 | -0.11 | 8.48E-01 | 9.81E-01 |
| <b>ULK3</b>        | 0.10  | 7.64E-01 | 1.00E+00 | -0.07 | 8.48E-01 | 9.81E-01 |
| <b>IL22RA1</b>     | -0.06 | 9.24E-01 | 1.00E+00 | 0.13  | 8.48E-01 | 9.81E-01 |
| <b>AC018868.1</b>  | 0.02  | 9.92E-01 | 1.00E+00 | -0.15 | 8.48E-01 | 9.81E-01 |
| <b>MRGPRF-AS1</b>  | -0.01 | 9.91E-01 | 1.00E+00 | 0.23  | 8.48E-01 | 9.81E-01 |
| <b>XPO1</b>        | 0.05  | 8.30E-01 | 1.00E+00 | -0.04 | 8.48E-01 | 9.81E-01 |
| <b>ADORA2B</b>     | 0.06  | 8.69E-01 | 1.00E+00 | -0.10 | 8.48E-01 | 9.81E-01 |
| <b>AC011498.7</b>  | -0.18 | 7.99E-01 | 1.00E+00 | -0.20 | 8.48E-01 | 9.81E-01 |
| <b>MTHFD1P1</b>    | 1.07  | 6.72E-01 | 1.00E+00 | -0.18 | 8.48E-01 | 9.81E-01 |
| <b>HIP1R</b>       | 0.05  | 8.72E-01 | 1.00E+00 | 0.10  | 8.48E-01 | 9.81E-01 |
| <b>RASSF8-AS1</b>  | 0.27  | 5.46E-01 | 1.00E+00 | 0.12  | 8.48E-01 | 9.81E-01 |
| <b>AP003392.5</b>  | 0.12  | 9.58E-01 | 1.00E+00 | 0.25  | 8.48E-01 | 9.81E-01 |
| <b>CERS3</b>       | 0.19  | 7.01E-01 | 1.00E+00 | 0.14  | 8.48E-01 | 9.81E-01 |
| <b>RAX</b>         | -0.34 | 6.35E-01 | 1.00E+00 | 0.61  | 8.48E-01 | 9.81E-01 |
| <b>AC087741.1</b>  | 0.42  | 6.80E-01 | 1.00E+00 | 0.16  | 8.48E-01 | 9.81E-01 |
| <b>AC027607.1</b>  | 0.32  | 9.15E-01 | 1.00E+00 | 0.23  | 8.48E-01 | 9.81E-01 |
| <b>SLC26A4</b>     | -0.70 | 3.99E-01 | 1.00E+00 | -0.40 | 8.48E-01 | 9.81E-01 |
| <b>AC010326.4</b>  | 0.16  | 8.78E-01 | 1.00E+00 | 0.13  | 8.48E-01 | 9.81E-01 |
| <b>NLRX1</b>       | -0.40 | 1.22E-01 | 1.00E+00 | 0.10  | 8.48E-01 | 9.81E-01 |
| <b>XLOC_005573</b> | -1.21 | 2.26E-01 | 1.00E+00 | 0.21  | 8.48E-01 | 9.81E-01 |
| <b>FGD5-AS1</b>    | 0.17  | 3.83E-01 | 1.00E+00 | -0.05 | 8.48E-01 | 9.81E-01 |
| <b>STK32B</b>      | 0.02  | 9.67E-01 | 1.00E+00 | 0.11  | 8.48E-01 | 9.81E-01 |
| <b>SMIM29</b>      | 0.00  | 9.91E-01 | 1.00E+00 | 0.06  | 8.48E-01 | 9.81E-01 |
| <b>GAL3ST4</b>     | 0.07  | 7.93E-01 | 1.00E+00 | 0.06  | 8.48E-01 | 9.81E-01 |
| <b>CEP290</b>      | 0.00  | 9.95E-01 | 1.00E+00 | -0.06 | 8.48E-01 | 9.81E-01 |
| <b>RP2</b>         | 0.29  | 3.98E-01 | 1.00E+00 | 0.05  | 8.48E-01 | 9.81E-01 |
| <b>AC064801.2</b>  | -0.17 | 9.51E-01 | 1.00E+00 | 0.61  | 8.48E-01 | 9.81E-01 |
| <b>TIAM1</b>       | -0.10 | 7.78E-01 | 1.00E+00 | 0.06  | 8.48E-01 | 9.81E-01 |
| <b>XLOC_007377</b> | 1.63  | 1.80E-01 | 1.00E+00 | -0.18 | 8.48E-01 | 9.81E-01 |
| <b>UTP20</b>       | 0.05  | 8.21E-01 | 1.00E+00 | 0.08  | 8.48E-01 | 9.81E-01 |
| <b>IL6R-AS1</b>    | -3.14 | 2.32E-03 | 2.43E-01 | 0.22  | 8.49E-01 | 9.81E-01 |

|                     |       |          |          |       |          |          |
|---------------------|-------|----------|----------|-------|----------|----------|
| <b>GUCD1</b>        | 0.05  | 7.38E-01 | 1.00E+00 | -0.09 | 8.49E-01 | 9.81E-01 |
| <b>SLC25A30-AS1</b> | 0.59  | 6.71E-01 | 1.00E+00 | 0.24  | 8.49E-01 | 9.81E-01 |
| <b>BAIAP2L1</b>     | 0.24  | 2.71E-01 | 1.00E+00 | 0.08  | 8.49E-01 | 9.81E-01 |
| <b>PCBP1-AS1</b>    | -0.10 | 7.57E-01 | 1.00E+00 | 0.06  | 8.49E-01 | 9.81E-01 |
| <b>AC008991.1</b>   | -0.46 | 8.04E-01 | 1.00E+00 | 0.23  | 8.49E-01 | 9.81E-01 |
| <b>AC100800.1</b>   | -1.47 | 6.70E-01 | 1.00E+00 | 0.26  | 8.49E-01 | 9.81E-01 |
| <b>DMXL1</b>        | -0.01 | 9.63E-01 | 1.00E+00 | -0.03 | 8.49E-01 | 9.81E-01 |
| <b>FAM184A</b>      | 0.69  | 1.59E-01 | 1.00E+00 | 0.15  | 8.49E-01 | 9.81E-01 |
| <b>RSL1D1</b>       | -0.10 | 6.66E-01 | 1.00E+00 | -0.06 | 8.49E-01 | 9.81E-01 |
| <b>AL365259.1</b>   | -1.07 | 5.09E-01 | 1.00E+00 | 0.22  | 8.49E-01 | 9.81E-01 |
| <b>CENPCP1</b>      | 1.76  | 6.07E-01 | 1.00E+00 | 0.15  | 8.49E-01 | 9.81E-01 |
| <b>BANF1P1</b>      | -1.42 | 6.73E-01 | 1.00E+00 | 0.23  | 8.49E-01 | 9.81E-01 |
| <b>AC083837.1</b>   | -0.69 | 5.70E-01 | 1.00E+00 | -0.22 | 8.49E-01 | 9.81E-01 |
| <b>AL136454.1</b>   | -0.25 | 8.18E-01 | 1.00E+00 | -0.15 | 8.49E-01 | 9.81E-01 |
| <b>RGL2</b>         | 0.08  | 7.09E-01 | 1.00E+00 | 0.05  | 8.49E-01 | 9.81E-01 |
| <b>AP000763.2</b>   | 0.00  | 1.00E+00 | NA       | -0.61 | 8.49E-01 | 9.81E-01 |
| <b>RFC3</b>         | 0.13  | 6.54E-01 | 1.00E+00 | 0.05  | 8.49E-01 | 9.81E-01 |
| <b>CHD1L</b>        | 0.04  | 8.53E-01 | 1.00E+00 | -0.03 | 8.49E-01 | 9.81E-01 |
| <b>AC106798.1</b>   | 1.18  | 3.14E-01 | 1.00E+00 | 0.19  | 8.49E-01 | 9.81E-01 |
| <b>PLA2G3</b>       | -0.09 | 8.80E-01 | 1.00E+00 | 0.15  | 8.49E-01 | 9.81E-01 |
| <b>ITGA2</b>        | -0.35 | 8.53E-02 | 1.00E+00 | 0.08  | 8.49E-01 | 9.81E-01 |
| <b>SAMD14</b>       | -0.58 | 3.12E-01 | 1.00E+00 | 0.60  | 8.49E-01 | 9.81E-01 |
| <b>DNA2</b>         | -0.24 | 6.63E-01 | 1.00E+00 | 0.12  | 8.49E-01 | 9.81E-01 |
| <b>BIN1</b>         | 0.42  | 4.53E-01 | 1.00E+00 | 0.10  | 8.49E-01 | 9.81E-01 |
| <b>SRSF1</b>        | 0.00  | 9.89E-01 | 1.00E+00 | -0.05 | 8.50E-01 | 9.81E-01 |
| <b>AC105001.1</b>   | -0.53 | 6.50E-01 | 1.00E+00 | 0.19  | 8.50E-01 | 9.81E-01 |
| <b>AL391152.1</b>   | -0.46 | 8.26E-01 | 1.00E+00 | 0.61  | 8.50E-01 | 9.81E-01 |
| <b>ERP27</b>        | 0.93  | 1.78E-01 | 1.00E+00 | -0.12 | 8.50E-01 | 9.81E-01 |
| <b>NAPB</b>         | -0.80 | 8.63E-02 | 1.00E+00 | -0.10 | 8.50E-01 | 9.81E-01 |
| <b>KLK1</b>         | 0.46  | 3.18E-01 | 1.00E+00 | -0.12 | 8.50E-01 | 9.81E-01 |
| <b>FAAP20</b>       | -0.09 | 7.41E-01 | 1.00E+00 | -0.07 | 8.50E-01 | 9.81E-01 |
| <b>FIBCD1</b>       | -1.16 | 2.37E-01 | 1.00E+00 | 0.28  | 8.50E-01 | 9.81E-01 |

|                    |       |          |          |       |          |          |
|--------------------|-------|----------|----------|-------|----------|----------|
| <b>TGIF2</b>       | 0.04  | 8.65E-01 | 1.00E+00 | -0.08 | 8.50E-01 | 9.81E-01 |
| <b>SMIM10L2A</b>   | 0.01  | 9.86E-01 | 1.00E+00 | -0.13 | 8.50E-01 | 9.81E-01 |
| <b>AHNAK</b>       | 0.06  | 7.95E-01 | 1.00E+00 | -0.08 | 8.50E-01 | 9.81E-01 |
| <b>RPUSD1</b>      | -0.52 | 8.56E-02 | 1.00E+00 | 0.07  | 8.50E-01 | 9.81E-01 |
| <b>TBX3</b>        | -0.01 | 9.88E-01 | 1.00E+00 | -0.09 | 8.50E-01 | 9.81E-01 |
| <b>YY2</b>         | 0.30  | 5.06E-01 | 1.00E+00 | 0.07  | 8.50E-01 | 9.81E-01 |
| <b>ACSM2A</b>      | -1.80 | 2.38E-01 | 1.00E+00 | -0.31 | 8.50E-01 | 9.81E-01 |
| <b>MOB3A</b>       | -0.07 | 7.40E-01 | 1.00E+00 | -0.07 | 8.50E-01 | 9.81E-01 |
| <b>XLOC_008005</b> | -1.25 | 5.54E-01 | 1.00E+00 | 0.25  | 8.50E-01 | 9.81E-01 |
| <b>ACSF2</b>       | 0.42  | 1.95E-01 | 1.00E+00 | 0.05  | 8.50E-01 | 9.81E-01 |
| <b>PTBP1</b>       | -0.34 | 1.69E-01 | 1.00E+00 | -0.08 | 8.50E-01 | 9.81E-01 |
| <b>HOOK2</b>       | 0.24  | 4.25E-01 | 1.00E+00 | 0.04  | 8.50E-01 | 9.81E-01 |
| <b>BTF3P12</b>     | NA    | NA       | NA       | -0.22 | 8.50E-01 | 9.81E-01 |
| <b>G38166</b>      | -2.07 | 1.13E-01 | 1.00E+00 | 0.20  | 8.50E-01 | 9.81E-01 |
| <b>PANX2</b>       | -0.79 | 2.42E-01 | 1.00E+00 | 0.60  | 8.50E-01 | 9.81E-01 |
| <b>ALG10</b>       | 0.25  | 5.01E-01 | 1.00E+00 | -0.07 | 8.50E-01 | 9.81E-01 |
| <b>EXOC3L1</b>     | -0.57 | 5.10E-02 | 1.00E+00 | 0.08  | 8.50E-01 | 9.81E-01 |
| <b>MRPL55</b>      | -0.08 | 7.45E-01 | 1.00E+00 | -0.06 | 8.50E-01 | 9.81E-01 |
| <b>AL513477.1</b>  | -0.81 | 7.65E-02 | 1.00E+00 | -0.20 | 8.50E-01 | 9.81E-01 |
| <b>IL12B</b>       | -3.10 | 3.61E-01 | 1.00E+00 | 0.60  | 8.51E-01 | 9.81E-01 |
| <b>TRIM3</b>       | 0.10  | 6.32E-01 | 1.00E+00 | 0.10  | 8.51E-01 | 9.81E-01 |
| <b>TMLHE</b>       | -0.16 | 5.06E-01 | 1.00E+00 | -0.04 | 8.51E-01 | 9.81E-01 |
| <b>AL139353.2</b>  | -0.55 | 6.85E-01 | 1.00E+00 | -0.13 | 8.51E-01 | 9.81E-01 |
| <b>TRAF1</b>       | -0.23 | 6.43E-01 | 1.00E+00 | 0.13  | 8.51E-01 | 9.81E-01 |
| <b>ADGRG1</b>      | -0.35 | 1.54E-01 | 1.00E+00 | -0.07 | 8.51E-01 | 9.81E-01 |
| <b>ALMS1</b>       | -0.08 | 7.04E-01 | 1.00E+00 | 0.08  | 8.51E-01 | 9.81E-01 |
| <b>UBE3C</b>       | 0.09  | 5.96E-01 | 1.00E+00 | 0.06  | 8.51E-01 | 9.81E-01 |
| <b>RSL24D1P1</b>   | NA    | NA       | NA       | 0.16  | 8.51E-01 | 9.81E-01 |
| <b>OR7E121P</b>    | 1.17  | 4.61E-01 | 1.00E+00 | 0.21  | 8.51E-01 | 9.81E-01 |
| <b>AL162293.1</b>  | NA    | NA       | NA       | -0.14 | 8.51E-01 | 9.81E-01 |
| <b>IRX3</b>        | -0.31 | 5.13E-01 | 1.00E+00 | -0.10 | 8.51E-01 | 9.81E-01 |
| <b>C17orf113</b>   | -0.27 | 4.76E-01 | 1.00E+00 | -0.15 | 8.51E-01 | 9.81E-01 |

|                   |       |          |          |       |          |          |
|-------------------|-------|----------|----------|-------|----------|----------|
| <b>CEBPD</b>      | -0.37 | 4.75E-01 | 1.00E+00 | -0.14 | 8.51E-01 | 9.81E-01 |
| <b>RITA1</b>      | -0.20 | 4.19E-01 | 1.00E+00 | 0.03  | 8.51E-01 | 9.81E-01 |
| <b>COL4A5</b>     | -0.35 | 1.93E-01 | 1.00E+00 | -0.07 | 8.51E-01 | 9.81E-01 |
| <b>WWP2</b>       | -0.22 | 2.99E-01 | 1.00E+00 | 0.07  | 8.51E-01 | 9.81E-01 |
| <b>EGR1</b>       | -1.58 | 3.40E-02 | 1.00E+00 | 0.11  | 8.51E-01 | 9.81E-01 |
| <b>RPL35AP21</b>  | NA    | NA       | NA       | 0.17  | 8.51E-01 | 9.81E-01 |
| <b>BEND7</b>      | -0.13 | 8.40E-01 | 1.00E+00 | -0.13 | 8.51E-01 | 9.81E-01 |
| <b>PNMA8A</b>     | -0.01 | 9.80E-01 | 1.00E+00 | 0.14  | 8.51E-01 | 9.81E-01 |
| <b>AC104260.2</b> | -0.09 | 9.05E-01 | 1.00E+00 | -0.23 | 8.51E-01 | 9.81E-01 |
| <b>AUTS2</b>      | -0.39 | 1.06E-01 | 1.00E+00 | -0.08 | 8.51E-01 | 9.81E-01 |
| <b>DPYSL2</b>     | 0.38  | 2.89E-01 | 1.00E+00 | -0.07 | 8.52E-01 | 9.82E-01 |
| <b>RFWD3</b>      | -0.28 | 1.93E-01 | 1.00E+00 | 0.06  | 8.52E-01 | 9.82E-01 |
| <b>AL035425.1</b> | -1.45 | 1.57E-01 | 1.00E+00 | 0.24  | 8.52E-01 | 9.82E-01 |
| <b>DHFR</b>       | -0.39 | 2.34E-01 | 1.00E+00 | -0.10 | 8.52E-01 | 9.82E-01 |
| <b>LINC00173</b>  | 1.48  | 3.15E-01 | 1.00E+00 | 0.23  | 8.52E-01 | 9.82E-01 |
| <b>AL845472.2</b> | -0.41 | 5.40E-01 | 1.00E+00 | -0.12 | 8.52E-01 | 9.82E-01 |
| <b>CLNS1A</b>     | 0.05  | 7.86E-01 | 1.00E+00 | 0.04  | 8.52E-01 | 9.82E-01 |
| <b>KIAA1257</b>   | -0.54 | 2.28E-01 | 1.00E+00 | -0.10 | 8.52E-01 | 9.82E-01 |
| <b>BCDIN3D</b>    | 0.54  | 1.35E-01 | 1.00E+00 | -0.07 | 8.52E-01 | 9.82E-01 |
| <b>MUC4</b>       | -1.90 | 2.61E-01 | 1.00E+00 | -0.25 | 8.52E-01 | 9.82E-01 |
| <b>NOP14</b>      | -0.35 | 2.21E-01 | 1.00E+00 | -0.08 | 8.52E-01 | 9.82E-01 |
| <b>AC022440.1</b> | -0.71 | 7.14E-01 | 1.00E+00 | -0.60 | 8.52E-01 | 9.82E-01 |
| <b>SGSM3</b>      | -1.27 | 7.07E-01 | 1.00E+00 | 0.13  | 8.52E-01 | 9.82E-01 |
| <b>CSPG4P8</b>    | -2.44 | 4.43E-02 | 1.00E+00 | -0.21 | 8.52E-01 | 9.82E-01 |
| <b>G4754</b>      | 1.05  | 5.30E-02 | 1.00E+00 | 0.08  | 8.52E-01 | 9.82E-01 |
| <b>GOT2P3</b>     | -1.84 | 5.95E-01 | 1.00E+00 | 0.17  | 8.52E-01 | 9.82E-01 |
| <b>PDZD9</b>      | 0.66  | 7.03E-01 | 1.00E+00 | -0.31 | 8.52E-01 | 9.82E-01 |
| <b>HIST1H4C</b>   | -1.84 | 3.87E-02 | 1.00E+00 | -0.58 | 8.52E-01 | 9.82E-01 |
| <b>FTO</b>        | -0.04 | 8.76E-01 | 1.00E+00 | -0.06 | 8.53E-01 | 9.82E-01 |
| <b>DPT</b>        | 1.66  | 4.00E-03 | 3.52E-01 | -0.11 | 8.53E-01 | 9.82E-01 |
| <b>TMED7</b>      | 0.14  | 5.52E-01 | 1.00E+00 | -0.04 | 8.53E-01 | 9.82E-01 |
| <b>NR2F1-AS1</b>  | 0.40  | 5.34E-01 | 1.00E+00 | -0.13 | 8.53E-01 | 9.82E-01 |

|            |        |          |          |       |          |          |
|------------|--------|----------|----------|-------|----------|----------|
| KRT40      | 0.11   | 9.57E-01 | 1.00E+00 | -0.59 | 8.53E-01 | 9.82E-01 |
| TADA2A     | -0.43  | 6.67E-02 | 1.00E+00 | 0.07  | 8.53E-01 | 9.82E-01 |
| RASEF      | 0.37   | 4.10E-01 | 1.00E+00 | 0.09  | 8.53E-01 | 9.82E-01 |
| AL355001.2 | -0.52  | 9.29E-02 | 1.00E+00 | 0.10  | 8.53E-01 | 9.82E-01 |
| TMEM144    | -0.38  | 1.16E-01 | 1.00E+00 | -0.05 | 8.53E-01 | 9.82E-01 |
| DNAJC6     | -1.03  | 3.83E-02 | 1.00E+00 | -0.12 | 8.53E-01 | 9.82E-01 |
| G34428     | -0.69  | 3.78E-01 | 1.00E+00 | -0.15 | 8.53E-01 | 9.82E-01 |
| AC005730.2 | -0.96  | 4.68E-01 | 1.00E+00 | -0.24 | 8.53E-01 | 9.82E-01 |
| RPL36A     | -1.29  | 1.21E-01 | 1.00E+00 | -0.08 | 8.53E-01 | 9.82E-01 |
| KAT6A      | -0.08  | 7.36E-01 | 1.00E+00 | -0.08 | 8.53E-01 | 9.82E-01 |
| G5880      | -1.45  | 5.40E-01 | 1.00E+00 | -0.35 | 8.53E-01 | 9.82E-01 |
| AL451074.6 | -0.20  | 9.53E-01 | 1.00E+00 | -0.29 | 8.53E-01 | 9.82E-01 |
| AC008966.2 | 1.65   | 4.67E-01 | 1.00E+00 | 0.23  | 8.53E-01 | 9.82E-01 |
| KRTAP10-7  | -0.56  | 8.70E-01 | 1.00E+00 | -0.59 | 8.53E-01 | 9.82E-01 |
| TDRD7      | 0.23   | 5.82E-01 | 1.00E+00 | 0.12  | 8.54E-01 | 9.82E-01 |
| DNAJB9     | -0.11  | 6.86E-01 | 1.00E+00 | -0.06 | 8.54E-01 | 9.82E-01 |
| SMN1       | 0.26   | 3.72E-01 | 1.00E+00 | -0.04 | 8.54E-01 | 9.82E-01 |
| TKT        | 0.00   | 9.99E-01 | 1.00E+00 | 0.07  | 8.54E-01 | 9.82E-01 |
| CCDC6      | -0.01  | 9.56E-01 | 1.00E+00 | -0.04 | 8.54E-01 | 9.82E-01 |
| C3orf79    | -0.48  | 8.79E-01 | 1.00E+00 | -0.28 | 8.54E-01 | 9.82E-01 |
| C1QBP      | -0.30  | 1.04E-01 | 1.00E+00 | -0.04 | 8.54E-01 | 9.82E-01 |
| C8orf31    | 0.89   | 3.31E-01 | 1.00E+00 | 0.52  | 8.54E-01 | 9.82E-01 |
| UBBP4      | 0.46   | 4.06E-01 | 1.00E+00 | -0.10 | 8.54E-01 | 9.82E-01 |
| PRR5L      | 0.32   | 5.44E-01 | 1.00E+00 | 0.14  | 8.54E-01 | 9.82E-01 |
| KRTAP4-4   | -29.80 | 1.11E-17 | 8.83E-15 | -0.59 | 8.54E-01 | 9.82E-01 |
| FBN3       | 0.05   | 9.67E-01 | 1.00E+00 | 0.34  | 8.54E-01 | 9.82E-01 |
| PDCD1      | -2.18  | 3.28E-02 | 1.00E+00 | 0.58  | 8.54E-01 | 9.82E-01 |
| ZNF180     | 0.09   | 7.38E-01 | 1.00E+00 | 0.05  | 8.54E-01 | 9.82E-01 |
| ST6GALNAC3 | 0.77   | 1.10E-01 | 1.00E+00 | 0.10  | 8.54E-01 | 9.82E-01 |
| AL391097.2 | 0.25   | 9.27E-01 | 1.00E+00 | -0.20 | 8.54E-01 | 9.82E-01 |
| ARPC3      | -0.12  | 5.79E-01 | 1.00E+00 | 0.03  | 8.54E-01 | 9.82E-01 |
| G2196      | -1.19  | 2.32E-01 | 1.00E+00 | -0.17 | 8.54E-01 | 9.82E-01 |

|                   |       |          |          |       |          |          |
|-------------------|-------|----------|----------|-------|----------|----------|
| <b>PRELID1P1</b>  | 1.02  | 7.67E-01 | 1.00E+00 | -0.11 | 8.54E-01 | 9.82E-01 |
| <b>DSP</b>        | -0.26 | 5.50E-01 | 1.00E+00 | -0.10 | 8.54E-01 | 9.82E-01 |
| <b>OPHN1</b>      | 0.29  | 3.86E-01 | 1.00E+00 | -0.09 | 8.54E-01 | 9.82E-01 |
| <b>HASPIN</b>     | -0.42 | 5.25E-01 | 1.00E+00 | 0.15  | 8.54E-01 | 9.82E-01 |
| <b>TSR1</b>       | -0.09 | 6.88E-01 | 1.00E+00 | 0.04  | 8.54E-01 | 9.82E-01 |
| <b>NOP53</b>      | -0.21 | 5.13E-01 | 1.00E+00 | 0.14  | 8.55E-01 | 9.82E-01 |
| <b>PRR26</b>      | 0.30  | 6.74E-01 | 1.00E+00 | 0.42  | 8.55E-01 | 9.82E-01 |
| <b>G42804</b>     | -2.08 | 1.92E-01 | 1.00E+00 | -0.25 | 8.55E-01 | 9.82E-01 |
| <b>EXOC2</b>      | -0.09 | 6.27E-01 | 1.00E+00 | 0.03  | 8.55E-01 | 9.82E-01 |
| <b>KLHL21</b>     | -0.13 | 6.55E-01 | 1.00E+00 | 0.07  | 8.55E-01 | 9.82E-01 |
| <b>SUDS3P1</b>    | 0.01  | 9.96E-01 | 1.00E+00 | -0.09 | 8.55E-01 | 9.82E-01 |
| <b>C5orf38</b>    | -0.21 | 5.81E-01 | 1.00E+00 | 0.11  | 8.55E-01 | 9.82E-01 |
| <b>AF064858.1</b> | -0.31 | 7.08E-01 | 1.00E+00 | -0.13 | 8.55E-01 | 9.82E-01 |
| <b>NRGN</b>       | -1.40 | 4.79E-02 | 1.00E+00 | 0.12  | 8.55E-01 | 9.82E-01 |
| <b>AC104667.2</b> | 0.21  | 8.80E-01 | 1.00E+00 | 0.18  | 8.55E-01 | 9.82E-01 |
| <b>IQCH</b>       | -0.29 | 5.74E-01 | 1.00E+00 | -0.12 | 8.55E-01 | 9.82E-01 |
| <b>EML5</b>       | 0.88  | 2.05E-01 | 1.00E+00 | 0.21  | 8.55E-01 | 9.82E-01 |
| <b>ACTR3</b>      | 0.15  | 6.10E-01 | 1.00E+00 | 0.03  | 8.55E-01 | 9.82E-01 |
| <b>HAS2-AS1</b>   | -0.79 | 3.91E-01 | 1.00E+00 | -0.13 | 8.55E-01 | 9.82E-01 |
| <b>GPALPP1</b>    | -0.12 | 4.98E-01 | 1.00E+00 | -0.03 | 8.55E-01 | 9.82E-01 |
| <b>CASP1P2</b>    | -0.50 | 5.03E-01 | 1.00E+00 | -0.13 | 8.55E-01 | 9.82E-01 |
| <b>CCDC144A</b>   | -3.24 | 2.97E-02 | 9.97E-01 | -0.23 | 8.55E-01 | 9.82E-01 |
| <b>RPS26P13</b>   | 0.25  | 9.42E-01 | 1.00E+00 | 0.16  | 8.55E-01 | 9.82E-01 |
| <b>LTF</b>        | -1.99 | 9.95E-02 | 1.00E+00 | -0.57 | 8.55E-01 | 9.82E-01 |
| <b>IL1RN</b>      | 0.17  | 6.72E-01 | 1.00E+00 | -0.09 | 8.55E-01 | 9.82E-01 |
| <b>AP005264.7</b> | -1.18 | 4.29E-01 | 1.00E+00 | 0.20  | 8.56E-01 | 9.82E-01 |
| <b>LRRC29</b>     | 0.00  | 9.98E-01 | 1.00E+00 | 0.07  | 8.56E-01 | 9.82E-01 |
| <b>LINC00484</b>  | -0.83 | 5.24E-01 | 1.00E+00 | 0.10  | 8.56E-01 | 9.82E-01 |
| <b>SERPINB10</b>  | -0.12 | 8.56E-01 | 1.00E+00 | 0.15  | 8.56E-01 | 9.82E-01 |
| <b>ZNF688</b>     | -0.11 | 6.39E-01 | 1.00E+00 | -0.10 | 8.56E-01 | 9.82E-01 |
| <b>BRD3OS</b>     | -0.12 | 6.95E-01 | 1.00E+00 | 0.05  | 8.56E-01 | 9.82E-01 |
| <b>GARNL3</b>     | -0.04 | 9.21E-01 | 1.00E+00 | -0.08 | 8.56E-01 | 9.82E-01 |



|                    |       |          |          |       |          |          |
|--------------------|-------|----------|----------|-------|----------|----------|
| <b>GPRC5D-AS1</b>  | 0.35  | 4.04E-01 | 1.00E+00 | 0.10  | 8.56E-01 | 9.82E-01 |
| <b>ANO9</b>        | -0.18 | 7.54E-01 | 1.00E+00 | -0.11 | 8.56E-01 | 9.82E-01 |
| <b>FAM214A</b>     | 0.19  | 4.60E-01 | 1.00E+00 | 0.04  | 8.56E-01 | 9.82E-01 |
| <b>LINC02257</b>   | -1.52 | 6.58E-01 | 1.00E+00 | 0.31  | 8.56E-01 | 9.82E-01 |
| <b>AC018628.2</b>  | -0.10 | 9.77E-01 | 1.00E+00 | 0.17  | 8.56E-01 | 9.82E-01 |
| <b>ADGRB3</b>      | -0.39 | 5.29E-01 | 1.00E+00 | 0.13  | 8.56E-01 | 9.82E-01 |
| <b>PALLD</b>       | -0.26 | 4.68E-01 | 1.00E+00 | 0.05  | 8.56E-01 | 9.82E-01 |
| <b>OR7C1</b>       | 0.32  | 7.27E-01 | 1.00E+00 | 0.14  | 8.56E-01 | 9.82E-01 |
| <b>EREG</b>        | -0.27 | 7.42E-01 | 1.00E+00 | -0.13 | 8.56E-01 | 9.82E-01 |
| <b>TMEM185B</b>    | 0.09  | 7.23E-01 | 1.00E+00 | -0.10 | 8.56E-01 | 9.82E-01 |
| <b>XLOC_009185</b> | -1.35 | 9.47E-02 | 1.00E+00 | -0.12 | 8.56E-01 | 9.82E-01 |
| <b>LINC01547</b>   | -0.55 | 9.67E-02 | 1.00E+00 | -0.07 | 8.56E-01 | 9.82E-01 |
| <b>AL353662.1</b>  | 3.43  | 3.01E-01 | 1.00E+00 | -0.31 | 8.56E-01 | 9.82E-01 |
| <b>G39423</b>      | 0.36  | 7.16E-01 | 1.00E+00 | 0.17  | 8.56E-01 | 9.82E-01 |
| <b>HEXIM2</b>      | 0.06  | 9.24E-01 | 1.00E+00 | 0.07  | 8.56E-01 | 9.82E-01 |
| <b>SPDYE1</b>      | 0.81  | 5.81E-01 | 1.00E+00 | 0.14  | 8.56E-01 | 9.82E-01 |
| <b>RSPO1</b>       | 0.14  | 6.22E-01 | 1.00E+00 | -0.11 | 8.56E-01 | 9.82E-01 |
| <b>AL513175.1</b>  | -0.06 | 9.86E-01 | 1.00E+00 | -0.13 | 8.56E-01 | 9.82E-01 |
| <b>FABP6</b>       | 0.23  | 8.28E-01 | 1.00E+00 | 0.16  | 8.56E-01 | 9.82E-01 |
| <b>AC136632.1</b>  | 0.06  | 9.31E-01 | 1.00E+00 | 0.09  | 8.57E-01 | 9.82E-01 |
| <b>CKAP5</b>       | -0.14 | 3.67E-01 | 1.00E+00 | -0.04 | 8.57E-01 | 9.82E-01 |
| <b>AC117489.1</b>  | 0.14  | 8.82E-01 | 1.00E+00 | 0.20  | 8.57E-01 | 9.82E-01 |
| <b>AC127502.2</b>  | 0.03  | 9.55E-01 | 1.00E+00 | 0.13  | 8.57E-01 | 9.82E-01 |
| <b>HIST2H2BD</b>   | -0.63 | 5.88E-01 | 1.00E+00 | -0.10 | 8.57E-01 | 9.82E-01 |
| <b>AC100801.1</b>  | 1.58  | 6.44E-01 | 1.00E+00 | 0.22  | 8.57E-01 | 9.82E-01 |
| <b>G3148</b>       | -2.68 | 2.78E-01 | 1.00E+00 | -0.24 | 8.57E-01 | 9.82E-01 |
| <b>PRPSAP2</b>     | -0.02 | 9.20E-01 | 1.00E+00 | 0.04  | 8.57E-01 | 9.82E-01 |
| <b>BACH1</b>       | -0.08 | 8.08E-01 | 1.00E+00 | 0.05  | 8.57E-01 | 9.82E-01 |
| <b>STOML3</b>      | -1.67 | 3.44E-01 | 1.00E+00 | 0.30  | 8.57E-01 | 9.82E-01 |
| <b>LRRC37A17P</b>  | 0.29  | 5.07E-01 | 1.00E+00 | -0.08 | 8.57E-01 | 9.82E-01 |
| <b>EIF2AK4</b>     | -0.03 | 8.76E-01 | 1.00E+00 | 0.06  | 8.57E-01 | 9.82E-01 |
| <b>FZD1</b>        | 0.04  | 9.19E-01 | 1.00E+00 | 0.09  | 8.57E-01 | 9.82E-01 |

|               |       |          |          |       |          |          |
|---------------|-------|----------|----------|-------|----------|----------|
| MYO16         | 0.58  | 4.84E-01 | 1.00E+00 | 0.16  | 8.57E-01 | 9.82E-01 |
| CLCN1         | -1.52 | 3.11E-01 | 1.00E+00 | 0.21  | 8.57E-01 | 9.82E-01 |
| GYPC          | 0.50  | 2.59E-01 | 1.00E+00 | 0.08  | 8.57E-01 | 9.82E-01 |
| ZNF665        | 0.03  | 9.28E-01 | 1.00E+00 | -0.08 | 8.57E-01 | 9.82E-01 |
| BLMH          | -0.25 | 6.57E-01 | 1.00E+00 | -0.09 | 8.57E-01 | 9.82E-01 |
| FLNC          | -0.40 | 4.95E-01 | 1.00E+00 | 0.13  | 8.57E-01 | 9.82E-01 |
| ZNF714        | -0.17 | 6.62E-01 | 1.00E+00 | 0.07  | 8.57E-01 | 9.82E-01 |
| RANGAP1       | -0.26 | 4.59E-01 | 1.00E+00 | 0.08  | 8.57E-01 | 9.82E-01 |
| MIR203        | -0.51 | 5.93E-01 | 1.00E+00 | 0.24  | 8.57E-01 | 9.82E-01 |
| RP11-111G23.1 | 0.09  | 8.93E-01 | 1.00E+00 | 0.10  | 8.57E-01 | 9.82E-01 |
| CPSF3         | 0.15  | 5.03E-01 | 1.00E+00 | -0.04 | 8.57E-01 | 9.82E-01 |
| MZF1-AS1      | -0.65 | 2.43E-01 | 1.00E+00 | -0.08 | 8.57E-01 | 9.82E-01 |
| ABCC4         | -0.54 | 1.73E-01 | 1.00E+00 | -0.07 | 8.57E-01 | 9.82E-01 |
| MRPS34        | -0.18 | 4.57E-01 | 1.00E+00 | -0.04 | 8.58E-01 | 9.82E-01 |
| AC025678.3    | -2.49 | 1.91E-01 | 1.00E+00 | 0.14  | 8.58E-01 | 9.82E-01 |
| AC007743.1    | 0.77  | 2.44E-01 | 1.00E+00 | 0.14  | 8.58E-01 | 9.82E-01 |
| NDC80         | -0.17 | 6.23E-01 | 1.00E+00 | 0.07  | 8.58E-01 | 9.82E-01 |
| AC135178.5    | -1.11 | 2.89E-01 | 1.00E+00 | 0.16  | 8.58E-01 | 9.82E-01 |
| AL035587.1    | -0.71 | 3.44E-01 | 1.00E+00 | 0.11  | 8.58E-01 | 9.82E-01 |
| KRTAP19-3     | -0.76 | 8.28E-01 | 1.00E+00 | 0.57  | 8.58E-01 | 9.82E-01 |
| ANK3          | -0.10 | 7.54E-01 | 1.00E+00 | -0.07 | 8.58E-01 | 9.82E-01 |
| PPM1A         | 0.05  | 8.24E-01 | 1.00E+00 | 0.04  | 8.58E-01 | 9.82E-01 |
| LSM2          | -0.18 | 2.93E-01 | 1.00E+00 | -0.04 | 8.58E-01 | 9.82E-01 |
| TOMM20        | 0.04  | 8.34E-01 | 1.00E+00 | -0.02 | 8.58E-01 | 9.82E-01 |
| ZNF681        | 0.48  | 2.38E-01 | 1.00E+00 | -0.10 | 8.58E-01 | 9.82E-01 |
| FOXF1         | -0.65 | 4.66E-01 | 1.00E+00 | 0.56  | 8.58E-01 | 9.82E-01 |
| MSL3P1        | -2.84 | 1.12E-01 | 1.00E+00 | 0.16  | 8.58E-01 | 9.82E-01 |
| AC092597.1    | -0.33 | 8.68E-01 | 1.00E+00 | 0.18  | 8.58E-01 | 9.82E-01 |
| GLB1L2        | 0.14  | 6.82E-01 | 1.00E+00 | 0.06  | 8.58E-01 | 9.82E-01 |
| AC116351.2    | 0.00  | 9.95E-01 | 1.00E+00 | 0.18  | 8.58E-01 | 9.82E-01 |
| AL031717.1    | -0.68 | 7.65E-01 | 1.00E+00 | -0.26 | 8.58E-01 | 9.82E-01 |
| CASK          | -0.06 | 7.94E-01 | 1.00E+00 | -0.07 | 8.58E-01 | 9.82E-01 |

|             |       |          |          |       |          |          |
|-------------|-------|----------|----------|-------|----------|----------|
| KCNS3       | 0.12  | 5.73E-01 | 1.00E+00 | -0.05 | 8.58E-01 | 9.82E-01 |
| XLOC_014104 | -1.94 | 1.31E-02 | 7.22E-01 | -0.12 | 8.58E-01 | 9.82E-01 |
| GUSBP5      | 0.28  | 6.87E-01 | 1.00E+00 | -0.09 | 8.58E-01 | 9.82E-01 |
| PAEP        | -1.69 | 3.24E-01 | 1.00E+00 | 0.26  | 8.58E-01 | 9.82E-01 |
| AC093535.1  | 1.96  | 2.25E-01 | 1.00E+00 | -0.15 | 8.58E-01 | 9.82E-01 |
| MIR210      | -1.13 | 3.81E-01 | 1.00E+00 | -0.25 | 8.59E-01 | 9.82E-01 |
| FITM2       | 0.23  | 3.90E-01 | 1.00E+00 | 0.06  | 8.59E-01 | 9.82E-01 |
| SNHG5       | 0.01  | 9.92E-01 | 1.00E+00 | 0.08  | 8.59E-01 | 9.82E-01 |
| NUP35       | 0.15  | 5.60E-01 | 1.00E+00 | -0.06 | 8.59E-01 | 9.82E-01 |
| RALBP1      | 0.18  | 5.11E-01 | 1.00E+00 | 0.05  | 8.59E-01 | 9.82E-01 |
| SNCA        | 0.04  | 8.83E-01 | 1.00E+00 | -0.07 | 8.59E-01 | 9.82E-01 |
| KIAA1211L   | -0.35 | 1.43E-01 | 1.00E+00 | -0.12 | 8.59E-01 | 9.82E-01 |
| ABCA10      | 0.65  | 4.09E-01 | 1.00E+00 | -0.11 | 8.59E-01 | 9.82E-01 |
| CDH19       | 0.23  | 6.37E-01 | 1.00E+00 | 0.08  | 8.59E-01 | 9.82E-01 |
| TMCO4       | -0.22 | 5.38E-01 | 1.00E+00 | 0.09  | 8.59E-01 | 9.82E-01 |
| PAFAH1B2    | 0.23  | 2.92E-01 | 1.00E+00 | -0.05 | 8.59E-01 | 9.82E-01 |
| GGH         | 0.12  | 7.78E-01 | 1.00E+00 | -0.07 | 8.59E-01 | 9.82E-01 |
| AC020978.7  | -0.30 | 9.25E-01 | 1.00E+00 | -0.23 | 8.59E-01 | 9.82E-01 |
| NCK2        | -0.21 | 2.99E-01 | 1.00E+00 | 0.08  | 8.59E-01 | 9.82E-01 |
| XLOC_007348 | 0.65  | 1.85E-01 | 1.00E+00 | -0.13 | 8.59E-01 | 9.82E-01 |
| AC133552.5  | -0.21 | 6.27E-01 | 1.00E+00 | 0.07  | 8.59E-01 | 9.82E-01 |
| SNORA84     | NA    | NA       | NA       | -0.19 | 8.59E-01 | 9.82E-01 |
| THRB-AS1    | 0.24  | 8.18E-01 | 1.00E+00 | -0.12 | 8.59E-01 | 9.82E-01 |
| CD44        | -0.25 | 3.04E-01 | 1.00E+00 | 0.04  | 8.59E-01 | 9.82E-01 |
| AC092902.5  | 2.11  | 2.27E-01 | 1.00E+00 | 0.15  | 8.59E-01 | 9.82E-01 |
| ADCY4       | 0.04  | 9.27E-01 | 1.00E+00 | -0.12 | 8.59E-01 | 9.82E-01 |
| C19orf54    | -0.33 | 2.03E-01 | 1.00E+00 | 0.07  | 8.59E-01 | 9.82E-01 |
| NUP43       | 0.15  | 6.73E-01 | 1.00E+00 | -0.06 | 8.59E-01 | 9.82E-01 |
| TTC36       | 0.86  | 5.24E-01 | 1.00E+00 | 0.19  | 8.59E-01 | 9.82E-01 |
| ZNF775      | -0.23 | 5.58E-01 | 1.00E+00 | 0.16  | 8.60E-01 | 9.82E-01 |
| NOP16       | -0.35 | 3.46E-01 | 1.00E+00 | 0.06  | 8.60E-01 | 9.82E-01 |
| SCD5        | -0.13 | 7.46E-01 | 1.00E+00 | -0.07 | 8.60E-01 | 9.82E-01 |

|                   |       |          |          |       |          |          |
|-------------------|-------|----------|----------|-------|----------|----------|
| <b>AC243960.3</b> | -3.61 | 1.33E-02 | 7.22E-01 | 0.41  | 8.60E-01 | 9.82E-01 |
| <b>MYBL2</b>      | -0.65 | 6.30E-02 | 1.00E+00 | 0.12  | 8.60E-01 | 9.82E-01 |
| <b>AC139795.1</b> | -0.16 | 7.06E-01 | 1.00E+00 | 0.11  | 8.60E-01 | 9.82E-01 |
| <b>RBMS1</b>      | 0.09  | 6.50E-01 | 1.00E+00 | -0.04 | 8.60E-01 | 9.82E-01 |
| <b>YWHAQP6</b>    | 1.39  | 6.86E-01 | 1.00E+00 | -0.18 | 8.60E-01 | 9.82E-01 |
| <b>AC136475.3</b> | -1.85 | 1.76E-01 | 1.00E+00 | 0.19  | 8.60E-01 | 9.82E-01 |
| <b>GPBP1L1</b>    | 0.10  | 6.57E-01 | 1.00E+00 | -0.03 | 8.60E-01 | 9.82E-01 |
| <b>AL138689.2</b> | -0.80 | 7.75E-01 | 1.00E+00 | -0.19 | 8.60E-01 | 9.82E-01 |
| <b>KRTAP4-11</b>  | -1.17 | 6.78E-01 | 1.00E+00 | -0.57 | 8.60E-01 | 9.82E-01 |
| <b>POU6F1</b>     | -0.43 | 1.13E-01 | 1.00E+00 | 0.09  | 8.60E-01 | 9.82E-01 |
| <b>GAS6-DT</b>    | 0.17  | 7.04E-01 | 1.00E+00 | -0.07 | 8.60E-01 | 9.82E-01 |
| <b>SOX13</b>      | 0.09  | 8.36E-01 | 1.00E+00 | 0.13  | 8.60E-01 | 9.82E-01 |
| <b>MDM4</b>       | 0.08  | 8.16E-01 | 1.00E+00 | 0.05  | 8.60E-01 | 9.82E-01 |
| <b>G42644</b>     | 1.18  | 4.65E-01 | 1.00E+00 | -0.17 | 8.60E-01 | 9.82E-01 |
| <b>C3orf52</b>    | 0.38  | 3.92E-01 | 1.00E+00 | 0.11  | 8.60E-01 | 9.82E-01 |
| <b>TTC9B</b>      | -3.77 | 1.01E-04 | 2.46E-02 | 0.18  | 8.60E-01 | 9.82E-01 |
| <b>AC073621.1</b> | 0.49  | 6.84E-01 | 1.00E+00 | -0.23 | 8.60E-01 | 9.82E-01 |
| <b>AKR1E2</b>     | 0.02  | 9.60E-01 | 1.00E+00 | 0.10  | 8.60E-01 | 9.82E-01 |
| <b>OTUD4</b>      | 0.10  | 6.98E-01 | 1.00E+00 | 0.06  | 8.60E-01 | 9.82E-01 |
| <b>CDC42EP2</b>   | 0.56  | 8.71E-01 | 1.00E+00 | -0.19 | 8.61E-01 | 9.82E-01 |
| <b>GABRB2</b>     | 0.02  | 9.79E-01 | 1.00E+00 | -0.54 | 8.61E-01 | 9.82E-01 |
| <b>PPFIA1</b>     | 0.11  | 5.98E-01 | 1.00E+00 | 0.05  | 8.61E-01 | 9.82E-01 |
| <b>RHOQP2</b>     | -0.92 | 3.30E-01 | 1.00E+00 | -0.13 | 8.61E-01 | 9.82E-01 |
| <b>CUTC</b>       | 0.14  | 6.36E-01 | 1.00E+00 | -0.05 | 8.61E-01 | 9.82E-01 |
| <b>ARHGEF6</b>    | 1.07  | 8.68E-02 | 1.00E+00 | 0.10  | 8.61E-01 | 9.82E-01 |
| <b>CSRNP1</b>     | -0.92 | 2.00E-01 | 1.00E+00 | -0.10 | 8.61E-01 | 9.82E-01 |
| <b>NRAV</b>       | 0.32  | 1.17E-01 | 1.00E+00 | 0.04  | 8.61E-01 | 9.82E-01 |
| <b>AC007920.2</b> | -0.03 | 9.74E-01 | 1.00E+00 | 0.16  | 8.61E-01 | 9.82E-01 |
| <b>SPATA20</b>    | -0.38 | 4.66E-01 | 1.00E+00 | 0.06  | 8.61E-01 | 9.82E-01 |
| <b>LACTB2-AS1</b> | 0.63  | 8.54E-01 | 1.00E+00 | -0.17 | 8.61E-01 | 9.82E-01 |
| <b>KANSL3</b>     | 0.20  | 5.08E-01 | 1.00E+00 | 0.07  | 8.61E-01 | 9.82E-01 |
| <b>SGCE</b>       | 0.60  | 1.52E-01 | 1.00E+00 | -0.07 | 8.61E-01 | 9.82E-01 |

|                     |       |          |          |       |          |          |
|---------------------|-------|----------|----------|-------|----------|----------|
| <b>DNAH17</b>       | -1.04 | 1.01E-01 | 1.00E+00 | 0.13  | 8.61E-01 | 9.82E-01 |
| <b>RNF225</b>       | -0.53 | 4.33E-01 | 1.00E+00 | -0.55 | 8.61E-01 | 9.82E-01 |
| <b>EFCAB14</b>      | 0.08  | 5.74E-01 | 1.00E+00 | 0.03  | 8.61E-01 | 9.82E-01 |
| <b>AC024145.1</b>   | 0.26  | 7.97E-01 | 1.00E+00 | 0.13  | 8.61E-01 | 9.82E-01 |
| <b>NAB1</b>         | 0.37  | 2.94E-01 | 1.00E+00 | 0.04  | 8.61E-01 | 9.83E-01 |
| <b>BLOC1S1-RDH5</b> | -1.36 | 3.21E-01 | 1.00E+00 | 0.13  | 8.61E-01 | 9.83E-01 |
| <b>SMPD4</b>        | -0.34 | 1.89E-01 | 1.00E+00 | 0.07  | 8.61E-01 | 9.83E-01 |
| <b>NSUN3</b>        | -0.04 | 8.81E-01 | 1.00E+00 | -0.04 | 8.61E-01 | 9.83E-01 |
| <b>HEATR5B</b>      | 0.18  | 4.80E-01 | 1.00E+00 | 0.06  | 8.61E-01 | 9.83E-01 |
| <b>PRRT3</b>        | -0.31 | 2.69E-01 | 1.00E+00 | -0.06 | 8.61E-01 | 9.83E-01 |
| <b>ASPSCR1</b>      | -0.33 | 2.42E-01 | 1.00E+00 | -0.08 | 8.61E-01 | 9.83E-01 |
| <b>AC027559.1</b>   | 1.22  | 2.55E-01 | 1.00E+00 | -0.13 | 8.61E-01 | 9.83E-01 |
| <b>AC104574.2</b>   | 0.76  | 8.27E-01 | 1.00E+00 | 0.21  | 8.62E-01 | 9.83E-01 |
| <b>CIAO2B</b>       | -0.10 | 5.44E-01 | 1.00E+00 | 0.04  | 8.62E-01 | 9.83E-01 |
| <b>VPS26C</b>       | 0.16  | 3.80E-01 | 1.00E+00 | -0.03 | 8.62E-01 | 9.83E-01 |
| <b>RPS26P8</b>      | 1.42  | 2.68E-01 | 1.00E+00 | 0.15  | 8.62E-01 | 9.83E-01 |
| <b>SUB1P1</b>       | -1.08 | 3.25E-01 | 1.00E+00 | 0.13  | 8.62E-01 | 9.83E-01 |
| <b>AC108134.3</b>   | 0.69  | 2.09E-01 | 1.00E+00 | 0.16  | 8.62E-01 | 9.83E-01 |
| <b>LINC00958</b>    | -0.24 | 6.83E-01 | 1.00E+00 | -0.11 | 8.62E-01 | 9.83E-01 |
| <b>GGA2</b>         | 0.10  | 7.04E-01 | 1.00E+00 | -0.06 | 8.62E-01 | 9.83E-01 |
| <b>HEY2</b>         | 0.06  | 9.13E-01 | 1.00E+00 | 0.09  | 8.62E-01 | 9.83E-01 |
| <b>IDE</b>          | 0.04  | 9.48E-01 | 1.00E+00 | -0.06 | 8.62E-01 | 9.83E-01 |
| <b>AC116565.1</b>   | -1.16 | 1.75E-02 | 8.33E-01 | 0.17  | 8.62E-01 | 9.83E-01 |
| <b>MMACHC</b>       | -0.18 | 5.85E-01 | 1.00E+00 | 0.08  | 8.62E-01 | 9.83E-01 |
| <b>AL136981.2</b>   | -0.36 | 6.84E-01 | 1.00E+00 | -0.15 | 8.62E-01 | 9.83E-01 |
| <b>LY6D</b>         | -0.19 | 6.84E-01 | 1.00E+00 | -0.12 | 8.62E-01 | 9.83E-01 |
| <b>SRP14</b>        | 0.13  | 3.69E-01 | 1.00E+00 | -0.04 | 8.62E-01 | 9.83E-01 |
| <b>C1orf116</b>     | 0.16  | 5.17E-01 | 1.00E+00 | -0.09 | 8.62E-01 | 9.83E-01 |
| <b>PITPNA-AS1</b>   | -0.18 | 9.33E-01 | 1.00E+00 | -0.14 | 8.62E-01 | 9.83E-01 |
| <b>BPI</b>          | -1.27 | 7.07E-01 | 1.00E+00 | -0.34 | 8.63E-01 | 9.83E-01 |
| <b>GSG1</b>         | 1.59  | 3.90E-01 | 1.00E+00 | 0.13  | 8.63E-01 | 9.83E-01 |
| <b>YWHAZ</b>        | -0.14 | 6.46E-01 | 1.00E+00 | -0.03 | 8.63E-01 | 9.83E-01 |

|                    |       |          |          |       |          |          |
|--------------------|-------|----------|----------|-------|----------|----------|
| <b>G24891</b>      | -0.45 | 4.33E-01 | 1.00E+00 | 0.11  | 8.63E-01 | 9.83E-01 |
| <b>XLOC_003061</b> | 0.78  | 3.53E-01 | 1.00E+00 | 0.40  | 8.63E-01 | 9.83E-01 |
| <b>TRIAP1</b>      | 0.12  | 6.71E-01 | 1.00E+00 | -0.06 | 8.63E-01 | 9.83E-01 |
| <b>LINC02407</b>   | 0.78  | 7.44E-01 | 1.00E+00 | 0.24  | 8.63E-01 | 9.83E-01 |
| <b>RFC2</b>        | -0.20 | 4.14E-01 | 1.00E+00 | -0.04 | 8.63E-01 | 9.83E-01 |
| <b>XLOC_001532</b> | -0.44 | 6.31E-01 | 1.00E+00 | -0.18 | 8.63E-01 | 9.83E-01 |
| <b>DDX10</b>       | -0.11 | 6.59E-01 | 1.00E+00 | -0.04 | 8.63E-01 | 9.83E-01 |
| <b>SLURP1</b>      | -0.17 | 7.66E-01 | 1.00E+00 | 0.14  | 8.63E-01 | 9.83E-01 |
| <b>CORO2B</b>      | -0.04 | 9.21E-01 | 1.00E+00 | -0.10 | 8.63E-01 | 9.83E-01 |
| <b>SLC2A12</b>     | -0.08 | 8.06E-01 | 1.00E+00 | -0.11 | 8.63E-01 | 9.83E-01 |
| <b>RPS20P22</b>    | 1.44  | 3.49E-01 | 1.00E+00 | 0.18  | 8.63E-01 | 9.83E-01 |
| <b>DNAJC3</b>      | 0.06  | 7.53E-01 | 1.00E+00 | -0.04 | 8.63E-01 | 9.83E-01 |
| <b>XLOC_001460</b> | 2.49  | 4.64E-01 | 1.00E+00 | 0.35  | 8.63E-01 | 9.83E-01 |
| <b>ZFHX2-AS1</b>   | 1.04  | 5.07E-01 | 1.00E+00 | 0.14  | 8.63E-01 | 9.83E-01 |
| <b>XLOC_002433</b> | 0.26  | 8.70E-01 | 1.00E+00 | 0.20  | 8.63E-01 | 9.83E-01 |
| <b>RPL17P36</b>    | -0.09 | 9.72E-01 | 1.00E+00 | -0.14 | 8.63E-01 | 9.83E-01 |
| <b>PTPN2</b>       | 0.06  | 7.35E-01 | 1.00E+00 | -0.03 | 8.63E-01 | 9.83E-01 |
| <b>CSNK2A3</b>     | -0.03 | 9.82E-01 | 1.00E+00 | 0.07  | 8.63E-01 | 9.83E-01 |
| <b>KLHL34</b>      | 0.19  | 7.78E-01 | 1.00E+00 | 0.20  | 8.63E-01 | 9.83E-01 |
| <b>AC090616.6</b>  | -0.71 | 5.41E-01 | 1.00E+00 | -0.14 | 8.64E-01 | 9.83E-01 |
| <b>AC009506.1</b>  | -0.12 | 7.48E-01 | 1.00E+00 | 0.05  | 8.64E-01 | 9.83E-01 |
| <b>CUL1</b>        | -0.11 | 5.83E-01 | 1.00E+00 | -0.02 | 8.64E-01 | 9.83E-01 |
| <b>AC090673.1</b>  | -0.41 | 8.13E-01 | 1.00E+00 | -0.17 | 8.64E-01 | 9.83E-01 |
| <b>C16orf89</b>    | 0.57  | 5.78E-01 | 1.00E+00 | -0.41 | 8.64E-01 | 9.83E-01 |
| <b>AL117379.1</b>  | 0.63  | 4.71E-01 | 1.00E+00 | -0.16 | 8.64E-01 | 9.84E-01 |
| <b>AC009065.8</b>  | 0.14  | 9.02E-01 | 1.00E+00 | -0.16 | 8.64E-01 | 9.84E-01 |
| <b>G10911</b>      | -1.01 | 2.72E-01 | 1.00E+00 | 0.26  | 8.64E-01 | 9.84E-01 |
| <b>RAMAC</b>       | 0.20  | 5.48E-01 | 1.00E+00 | 0.07  | 8.64E-01 | 9.84E-01 |
| <b>AL031283.3</b>  | -2.67 | 2.24E-01 | 1.00E+00 | 0.23  | 8.64E-01 | 9.84E-01 |
| <b>PCDHB4</b>      | -0.19 | 6.96E-01 | 1.00E+00 | -0.10 | 8.64E-01 | 9.84E-01 |
| <b>PLPP2</b>       | -0.13 | 7.49E-01 | 1.00E+00 | -0.06 | 8.65E-01 | 9.84E-01 |
| <b>FMO1</b>        | -0.39 | 4.11E-01 | 1.00E+00 | -0.09 | 8.65E-01 | 9.84E-01 |

|                   |       |          |          |       |          |          |
|-------------------|-------|----------|----------|-------|----------|----------|
| <b>AL158163.1</b> | 0.33  | 7.52E-01 | 1.00E+00 | -0.13 | 8.65E-01 | 9.84E-01 |
| <b>LGALSL-DT</b>  | 0.08  | 9.11E-01 | 1.00E+00 | 0.14  | 8.65E-01 | 9.84E-01 |
| <b>SEMA4F</b>     | 0.33  | 4.08E-01 | 1.00E+00 | 0.11  | 8.65E-01 | 9.84E-01 |
| <b>ATP2A3</b>     | 0.28  | 7.29E-01 | 1.00E+00 | -0.12 | 8.65E-01 | 9.84E-01 |
| <b>OVCH2</b>      | -0.27 | 7.88E-01 | 1.00E+00 | 0.14  | 8.65E-01 | 9.84E-01 |
| <b>MAB21L4</b>    | -0.54 | 2.40E-01 | 1.00E+00 | 0.11  | 8.65E-01 | 9.84E-01 |
| <b>CFAP97D1</b>   | -0.10 | 9.73E-01 | 1.00E+00 | -0.33 | 8.65E-01 | 9.84E-01 |
| <b>TMEM154</b>    | 0.17  | 7.08E-01 | 1.00E+00 | -0.09 | 8.65E-01 | 9.84E-01 |
| <b>PRKD3</b>      | 0.54  | 2.12E-02 | 8.94E-01 | -0.06 | 8.65E-01 | 9.84E-01 |
| <b>TRIM58</b>     | 0.18  | 8.00E-01 | 1.00E+00 | -0.15 | 8.65E-01 | 9.84E-01 |
| <b>AL096870.2</b> | -2.28 | 1.52E-01 | 1.00E+00 | 0.12  | 8.65E-01 | 9.84E-01 |
| <b>ASGR2</b>      | 0.19  | 7.28E-01 | 1.00E+00 | 0.08  | 8.65E-01 | 9.84E-01 |
| <b>TONSL</b>      | -0.58 | 3.86E-02 | 1.00E+00 | 0.10  | 8.65E-01 | 9.84E-01 |
| <b>AUP1</b>       | -0.21 | 3.71E-01 | 1.00E+00 | -0.03 | 8.65E-01 | 9.84E-01 |
| <b>AC010889.1</b> | 0.15  | 9.65E-01 | 1.00E+00 | 0.32  | 8.65E-01 | 9.84E-01 |
| <b>OCEL1</b>      | 0.20  | 5.73E-01 | 1.00E+00 | 0.05  | 8.65E-01 | 9.84E-01 |
| <b>MAP1B</b>      | 0.16  | 6.81E-01 | 1.00E+00 | -0.06 | 8.65E-01 | 9.84E-01 |
| <b>RSL24D1</b>    | 0.13  | 5.79E-01 | 1.00E+00 | -0.05 | 8.66E-01 | 9.84E-01 |
| <b>AP3B2</b>      | -1.91 | 2.78E-05 | 7.87E-03 | -0.13 | 8.66E-01 | 9.84E-01 |
| <b>LINC02518</b>  | -1.12 | 3.87E-01 | 1.00E+00 | 0.18  | 8.66E-01 | 9.84E-01 |
| <b>TCP1</b>       | 0.00  | 9.96E-01 | 1.00E+00 | -0.03 | 8.66E-01 | 9.84E-01 |
| <b>DNAJC14</b>    | 0.00  | 9.90E-01 | 1.00E+00 | -0.05 | 8.66E-01 | 9.84E-01 |
| <b>RPN2</b>       | -0.05 | 7.44E-01 | 1.00E+00 | 0.02  | 8.66E-01 | 9.84E-01 |
| <b>LINC00639</b>  | 0.80  | 3.10E-01 | 1.00E+00 | 0.21  | 8.66E-01 | 9.84E-01 |
| <b>KMT2A</b>      | -0.11 | 6.33E-01 | 1.00E+00 | 0.06  | 8.66E-01 | 9.84E-01 |
| <b>P4HB</b>       | -0.07 | 7.26E-01 | 1.00E+00 | 0.04  | 8.66E-01 | 9.84E-01 |
| <b>NBEA</b>       | 0.25  | 6.58E-01 | 1.00E+00 | 0.09  | 8.66E-01 | 9.84E-01 |
| <b>AL137077.2</b> | 0.78  | 2.73E-01 | 1.00E+00 | -0.16 | 8.66E-01 | 9.84E-01 |
| <b>AC005383.1</b> | -0.19 | 8.68E-01 | 1.00E+00 | 0.20  | 8.66E-01 | 9.84E-01 |
| <b>AL360270.1</b> | 0.12  | 8.95E-01 | 1.00E+00 | 0.15  | 8.66E-01 | 9.84E-01 |
| <b>RIF1</b>       | -0.10 | 6.75E-01 | 1.00E+00 | -0.04 | 8.66E-01 | 9.84E-01 |
| <b>KLC2</b>       | -0.57 | 9.33E-03 | 6.05E-01 | -0.09 | 8.66E-01 | 9.84E-01 |

|                    |       |          |          |       |          |          |
|--------------------|-------|----------|----------|-------|----------|----------|
| <b>WDR70</b>       | 0.06  | 7.57E-01 | 1.00E+00 | -0.02 | 8.66E-01 | 9.84E-01 |
| <b>AC068338.2</b>  | 0.23  | 6.23E-01 | 1.00E+00 | -0.08 | 8.66E-01 | 9.84E-01 |
| <b>PCDHGA8</b>     | -1.05 | 1.57E-01 | 1.00E+00 | 0.15  | 8.66E-01 | 9.84E-01 |
| <b>TMCC3</b>       | 0.01  | 9.75E-01 | 1.00E+00 | 0.06  | 8.66E-01 | 9.84E-01 |
| <b>ARMC4</b>       | 0.29  | 7.58E-01 | 1.00E+00 | 0.45  | 8.66E-01 | 9.84E-01 |
| <b>ZNF524</b>      | 0.05  | 8.35E-01 | 1.00E+00 | 0.04  | 8.66E-01 | 9.84E-01 |
| <b>KCTD13</b>      | -0.54 | 6.03E-02 | 1.00E+00 | -0.06 | 8.67E-01 | 9.84E-01 |
| <b>DOK7</b>        | -2.06 | 4.85E-02 | 1.00E+00 | 0.17  | 8.67E-01 | 9.84E-01 |
| <b>SYNJ1</b>       | -0.28 | 5.16E-01 | 1.00E+00 | 0.09  | 8.67E-01 | 9.84E-01 |
| <b>GNPNAT1</b>     | -0.19 | 3.83E-01 | 1.00E+00 | -0.04 | 8.67E-01 | 9.84E-01 |
| <b>LINC02202</b>   | 0.86  | 9.78E-02 | 1.00E+00 | 0.09  | 8.67E-01 | 9.84E-01 |
| <b>TTLL4</b>       | -0.41 | 8.02E-02 | 1.00E+00 | 0.09  | 8.67E-01 | 9.84E-01 |
| <b>ABI2</b>        | 0.14  | 6.20E-01 | 1.00E+00 | -0.03 | 8.67E-01 | 9.84E-01 |
| <b>MBIP</b>        | 0.03  | 8.98E-01 | 1.00E+00 | -0.06 | 8.67E-01 | 9.84E-01 |
| <b>COL25A1</b>     | -0.14 | 8.16E-01 | 1.00E+00 | 0.13  | 8.67E-01 | 9.84E-01 |
| <b>HAGLR</b>       | -0.19 | 7.23E-01 | 1.00E+00 | 0.12  | 8.67E-01 | 9.84E-01 |
| <b>NDUFS8</b>      | 0.02  | 9.49E-01 | 1.00E+00 | -0.05 | 8.67E-01 | 9.84E-01 |
| <b>PRR14L</b>      | -0.13 | 5.08E-01 | 1.00E+00 | -0.04 | 8.67E-01 | 9.84E-01 |
| <b>RELN</b>        | 0.41  | 4.45E-01 | 1.00E+00 | 0.11  | 8.67E-01 | 9.84E-01 |
| <b>CRYZ</b>        | -0.13 | 6.28E-01 | 1.00E+00 | 0.05  | 8.67E-01 | 9.84E-01 |
| <b>AC005072.1</b>  | 0.92  | 6.30E-01 | 1.00E+00 | -0.17 | 8.67E-01 | 9.84E-01 |
| <b>AC020571.1</b>  | 1.86  | 1.37E-01 | 1.00E+00 | 0.17  | 8.67E-01 | 9.84E-01 |
| <b>AC100830.1</b>  | -0.47 | 6.52E-01 | 1.00E+00 | -0.19 | 8.67E-01 | 9.84E-01 |
| <b>CENPL</b>       | -0.11 | 6.62E-01 | 1.00E+00 | -0.06 | 8.67E-01 | 9.84E-01 |
| <b>CCDC84</b>      | 0.10  | 8.27E-01 | 1.00E+00 | -0.05 | 8.67E-01 | 9.84E-01 |
| <b>XLOC_009389</b> | -0.96 | 1.80E-01 | 1.00E+00 | 0.14  | 8.67E-01 | 9.84E-01 |
| <b>AC096720.2</b>  | -0.32 | 9.09E-01 | 1.00E+00 | 0.20  | 8.67E-01 | 9.84E-01 |
| <b>COPZ1</b>       | 0.00  | 9.99E-01 | 1.00E+00 | 0.02  | 8.67E-01 | 9.84E-01 |
| <b>AC009090.6</b>  | -0.44 | 7.40E-01 | 1.00E+00 | -0.16 | 8.67E-01 | 9.84E-01 |
| <b>ZBTB1</b>       | 0.13  | 5.54E-01 | 1.00E+00 | -0.03 | 8.68E-01 | 9.84E-01 |
| <b>AC007728.3</b>  | -0.28 | 8.87E-01 | 1.00E+00 | -0.20 | 8.68E-01 | 9.84E-01 |
| <b>NR2F2-AS1</b>   | 0.67  | 2.39E-01 | 1.00E+00 | -0.10 | 8.68E-01 | 9.84E-01 |



|             |       |          |          |       |          |          |
|-------------|-------|----------|----------|-------|----------|----------|
| BCAS4       | -0.37 | 4.35E-01 | 1.00E+00 | 0.05  | 8.68E-01 | 9.84E-01 |
| ABLIM3      | 0.67  | 1.96E-01 | 1.00E+00 | -0.09 | 8.68E-01 | 9.84E-01 |
| ATP9B       | -0.02 | 9.27E-01 | 1.00E+00 | 0.03  | 8.68E-01 | 9.84E-01 |
| SP1         | -0.04 | 8.40E-01 | 1.00E+00 | 0.06  | 8.68E-01 | 9.84E-01 |
| KRT85       | -3.53 | 2.79E-01 | 1.00E+00 | -0.52 | 8.68E-01 | 9.84E-01 |
| UCHL1       | 0.59  | 4.56E-01 | 1.00E+00 | -0.10 | 8.68E-01 | 9.84E-01 |
| AL121772.1  | -0.13 | 8.89E-01 | 1.00E+00 | -0.18 | 8.68E-01 | 9.84E-01 |
| RBM38       | -0.05 | 8.52E-01 | 1.00E+00 | 0.09  | 8.68E-01 | 9.84E-01 |
| NUDC        | -0.04 | 8.41E-01 | 1.00E+00 | 0.02  | 8.68E-01 | 9.84E-01 |
| NCAPD3      | 0.28  | 2.50E-01 | 1.00E+00 | -0.05 | 8.68E-01 | 9.84E-01 |
| PNMA8B      | 0.03  | 9.15E-01 | 1.00E+00 | 0.11  | 8.68E-01 | 9.84E-01 |
| HR          | -0.11 | 7.88E-01 | 1.00E+00 | -0.13 | 8.68E-01 | 9.84E-01 |
| TTLL6       | -3.36 | 6.82E-02 | 1.00E+00 | -0.31 | 8.68E-01 | 9.84E-01 |
| PADI3       | -2.33 | 3.92E-05 | 1.06E-02 | 0.17  | 8.68E-01 | 9.84E-01 |
| XLOC_006338 | -2.50 | 1.00E-01 | 1.00E+00 | 0.23  | 8.68E-01 | 9.84E-01 |
| SETD6       | -0.28 | 3.34E-01 | 1.00E+00 | -0.04 | 8.68E-01 | 9.84E-01 |
| MYBBP1A     | -0.48 | 5.29E-02 | 1.00E+00 | 0.08  | 8.68E-01 | 9.84E-01 |
| RNF26       | -0.10 | 6.75E-01 | 1.00E+00 | -0.06 | 8.68E-01 | 9.84E-01 |
| NFATC1      | -0.74 | 4.74E-03 | 3.98E-01 | 0.08  | 8.68E-01 | 9.84E-01 |
| RPS4XP6     | -0.56 | 8.73E-01 | 1.00E+00 | -0.14 | 8.68E-01 | 9.84E-01 |
| PLAC9       | 0.20  | 5.99E-01 | 1.00E+00 | 0.08  | 8.68E-01 | 9.84E-01 |
| AL078645.1  | 0.32  | 9.28E-01 | 1.00E+00 | 0.23  | 8.68E-01 | 9.84E-01 |
| DKK2        | -0.33 | 5.93E-01 | 1.00E+00 | 0.08  | 8.69E-01 | 9.84E-01 |
| KLHL24      | 0.17  | 6.06E-01 | 1.00E+00 | -0.05 | 8.69E-01 | 9.84E-01 |
| UCKL1       | -0.08 | 7.14E-01 | 1.00E+00 | 0.02  | 8.69E-01 | 9.84E-01 |
| ARHGAP23    | -0.32 | 4.17E-01 | 1.00E+00 | -0.10 | 8.69E-01 | 9.84E-01 |
| LIPE        | 4.03  | 6.28E-03 | 4.75E-01 | -0.52 | 8.69E-01 | 9.84E-01 |
| ADAT3       | -0.34 | 4.55E-01 | 1.00E+00 | 0.10  | 8.69E-01 | 9.84E-01 |
| GPATCH1     | 0.13  | 5.23E-01 | 1.00E+00 | 0.05  | 8.69E-01 | 9.84E-01 |
| AP001282.1  | 0.84  | 8.06E-01 | 1.00E+00 | -0.10 | 8.69E-01 | 9.84E-01 |
| XLOC_005155 | 0.34  | 9.23E-01 | 1.00E+00 | -0.24 | 8.69E-01 | 9.84E-01 |
| HSPBAP1     | -0.23 | 5.81E-01 | 1.00E+00 | 0.05  | 8.69E-01 | 9.84E-01 |

|                    |       |          |          |       |          |          |
|--------------------|-------|----------|----------|-------|----------|----------|
| <b>NCOA6</b>       | -0.29 | 2.58E-01 | 1.00E+00 | 0.07  | 8.69E-01 | 9.84E-01 |
| <b>XLOC_013093</b> | 0.10  | 9.47E-01 | 1.00E+00 | -0.22 | 8.69E-01 | 9.84E-01 |
| <b>ZNF674</b>      | 0.35  | 4.15E-01 | 1.00E+00 | -0.09 | 8.69E-01 | 9.84E-01 |
| <b>LZTS3</b>       | -0.10 | 8.56E-01 | 1.00E+00 | 0.15  | 8.69E-01 | 9.84E-01 |
| <b>RSRP1</b>       | -0.36 | 5.39E-01 | 1.00E+00 | 0.07  | 8.69E-01 | 9.84E-01 |
| <b>SDAD1P1</b>     | -0.44 | 1.98E-01 | 1.00E+00 | -0.06 | 8.69E-01 | 9.84E-01 |
| <b>LPAR1</b>       | 0.51  | 2.13E-01 | 1.00E+00 | -0.06 | 8.69E-01 | 9.84E-01 |
| <b>G8227</b>       | -1.00 | 1.68E-01 | 1.00E+00 | 0.11  | 8.69E-01 | 9.84E-01 |
| <b>LINC00683</b>   | -0.09 | 9.19E-01 | 1.00E+00 | 0.18  | 8.69E-01 | 9.84E-01 |
| <b>NAA25</b>       | 0.22  | 4.49E-01 | 1.00E+00 | -0.04 | 8.70E-01 | 9.84E-01 |
| <b>AL596087.1</b>  | 0.02  | 9.88E-01 | 1.00E+00 | 0.13  | 8.70E-01 | 9.84E-01 |
| <b>AC027279.4</b>  | 2.64  | 4.38E-01 | 1.00E+00 | 0.53  | 8.70E-01 | 9.84E-01 |
| <b>YWHABP2</b>     | -1.04 | 6.66E-01 | 1.00E+00 | 0.13  | 8.70E-01 | 9.84E-01 |
| <b>ADAMTSL2</b>    | -0.23 | 5.91E-01 | 1.00E+00 | 0.48  | 8.70E-01 | 9.84E-01 |
| <b>KDM4B</b>       | -0.16 | 4.85E-01 | 1.00E+00 | -0.09 | 8.70E-01 | 9.84E-01 |
| <b>WDR12</b>       | -0.05 | 8.50E-01 | 1.00E+00 | 0.03  | 8.70E-01 | 9.84E-01 |
| <b>HIST1H2AI</b>   | 0.66  | 6.90E-01 | 1.00E+00 | -0.13 | 8.70E-01 | 9.84E-01 |
| <b>IGLV3-16</b>    | NA    | NA       | NA       | 0.53  | 8.70E-01 | 9.84E-01 |
| <b>CASC4</b>       | 0.39  | 2.91E-01 | 1.00E+00 | -0.05 | 8.70E-01 | 9.84E-01 |
| <b>RPP21</b>       | 1.13  | 7.44E-01 | 1.00E+00 | 0.18  | 8.70E-01 | 9.84E-01 |
| <b>AC090152.1</b>  | -0.36 | 5.20E-01 | 1.00E+00 | -0.10 | 8.70E-01 | 9.84E-01 |
| <b>TMCO3</b>       | 0.31  | 4.14E-01 | 1.00E+00 | -0.05 | 8.70E-01 | 9.84E-01 |
| <b>ZNF597</b>      | 0.43  | 1.34E-01 | 1.00E+00 | 0.06  | 8.70E-01 | 9.85E-01 |
| <b>REL</b>         | -0.49 | 1.75E-01 | 1.00E+00 | 0.07  | 8.70E-01 | 9.85E-01 |
| <b>IGHJ4</b>       | 0.56  | 8.71E-01 | 1.00E+00 | 0.53  | 8.70E-01 | 9.85E-01 |
| <b>TMEM150A</b>    | 0.29  | 3.58E-01 | 1.00E+00 | 0.06  | 8.70E-01 | 9.85E-01 |
| <b>ESR2</b>        | 0.86  | 2.87E-01 | 1.00E+00 | -0.11 | 8.70E-01 | 9.85E-01 |
| <b>SULT1A2</b>     | -1.52 | 3.01E-01 | 1.00E+00 | -0.13 | 8.70E-01 | 9.85E-01 |
| <b>IPO5</b>        | 0.17  | 5.15E-01 | 1.00E+00 | 0.05  | 8.70E-01 | 9.85E-01 |
| <b>AC008038.1</b>  | -0.22 | 5.25E-01 | 1.00E+00 | -0.08 | 8.70E-01 | 9.85E-01 |
| <b>RCN1</b>        | 0.22  | 5.34E-01 | 1.00E+00 | 0.05  | 8.70E-01 | 9.85E-01 |
| <b>MITF</b>        | -0.05 | 8.90E-01 | 1.00E+00 | -0.05 | 8.71E-01 | 9.85E-01 |

|               |       |          |          |       |          |          |
|---------------|-------|----------|----------|-------|----------|----------|
| KCCAT333      | 1.14  | 2.53E-01 | 1.00E+00 | 0.19  | 8.71E-01 | 9.85E-01 |
| ANKRD53       | 0.72  | 2.93E-01 | 1.00E+00 | 0.30  | 8.71E-01 | 9.85E-01 |
| AC007938.3    | -0.77 | 6.03E-01 | 1.00E+00 | 0.14  | 8.71E-01 | 9.85E-01 |
| CTNNBIP1      | 0.08  | 8.56E-01 | 1.00E+00 | 0.07  | 8.71E-01 | 9.85E-01 |
| G9256         | -2.13 | 7.67E-02 | 1.00E+00 | 0.16  | 8.71E-01 | 9.85E-01 |
| AC096537.1    | -1.40 | 6.84E-01 | 1.00E+00 | -0.28 | 8.71E-01 | 9.85E-01 |
| SPTLC1        | -0.07 | 7.40E-01 | 1.00E+00 | 0.03  | 8.71E-01 | 9.85E-01 |
| PRXL2B        | -0.37 | 5.35E-02 | 1.00E+00 | 0.06  | 8.71E-01 | 9.85E-01 |
| ZNF669        | 0.24  | 3.49E-01 | 1.00E+00 | -0.05 | 8.71E-01 | 9.85E-01 |
| PYM1          | -0.19 | 5.19E-01 | 1.00E+00 | -0.05 | 8.71E-01 | 9.85E-01 |
| SLC1A3        | -0.02 | 9.49E-01 | 1.00E+00 | 0.09  | 8.71E-01 | 9.85E-01 |
| PSME3         | -0.12 | 5.63E-01 | 1.00E+00 | 0.02  | 8.71E-01 | 9.85E-01 |
| ZNF185        | -0.23 | 5.41E-01 | 1.00E+00 | -0.08 | 8.71E-01 | 9.85E-01 |
| ISPD          | -0.70 | 5.20E-02 | 1.00E+00 | -0.06 | 8.71E-01 | 9.85E-01 |
| KCTD21-AS1    | 0.55  | 4.65E-01 | 1.00E+00 | -0.10 | 8.72E-01 | 9.85E-01 |
| PEX11G        | -0.29 | 3.92E-01 | 1.00E+00 | 0.05  | 8.72E-01 | 9.85E-01 |
| AQP7P4        | 2.23  | 1.93E-01 | 1.00E+00 | -0.48 | 8.72E-01 | 9.85E-01 |
| XLOC_000529   | 5.12  | 9.52E-03 | 6.06E-01 | 0.51  | 8.72E-01 | 9.85E-01 |
| AFAP1L1       | 0.11  | 7.95E-01 | 1.00E+00 | -0.10 | 8.72E-01 | 9.85E-01 |
| SRSF6         | -0.26 | 2.45E-01 | 1.00E+00 | 0.05  | 8.72E-01 | 9.85E-01 |
| LINC02288     | 2.93  | 5.59E-02 | 1.00E+00 | 0.18  | 8.72E-01 | 9.85E-01 |
| ZMYND12       | -0.66 | 2.81E-01 | 1.00E+00 | 0.09  | 8.72E-01 | 9.85E-01 |
| RP11-497H16.6 | -0.90 | 7.32E-01 | 1.00E+00 | -0.20 | 8.72E-01 | 9.85E-01 |
| AC145124.1    | -0.40 | 5.45E-01 | 1.00E+00 | -0.09 | 8.72E-01 | 9.85E-01 |
| RAD23B        | 0.05  | 8.66E-01 | 1.00E+00 | 0.08  | 8.72E-01 | 9.85E-01 |
| HDGF          | -0.11 | 6.80E-01 | 1.00E+00 | 0.08  | 8.72E-01 | 9.85E-01 |
| TRAF2         | 0.01  | 9.67E-01 | 1.00E+00 | 0.07  | 8.72E-01 | 9.85E-01 |
| EDNRB         | 0.67  | 6.26E-02 | 1.00E+00 | 0.06  | 8.72E-01 | 9.85E-01 |
| RBM26         | 0.01  | 9.57E-01 | 1.00E+00 | -0.05 | 8.72E-01 | 9.85E-01 |
| FAM181B       | -0.27 | 5.41E-01 | 1.00E+00 | 0.16  | 8.72E-01 | 9.85E-01 |
| CHD5          | -1.98 | 5.45E-01 | 1.00E+00 | 0.51  | 8.72E-01 | 9.85E-01 |
| KANK4         | 1.77  | 5.59E-02 | 1.00E+00 | -0.13 | 8.72E-01 | 9.85E-01 |

|                    |       |          |          |       |          |          |
|--------------------|-------|----------|----------|-------|----------|----------|
| <b>ABO</b>         | 0.93  | 2.51E-02 | 9.28E-01 | -0.09 | 8.72E-01 | 9.85E-01 |
| <b>RIMBP3</b>      | 0.48  | 6.82E-01 | 1.00E+00 | -0.26 | 8.73E-01 | 9.85E-01 |
| <b>PHBP20</b>      | 1.37  | 6.91E-01 | 1.00E+00 | -0.18 | 8.73E-01 | 9.85E-01 |
| <b>PPIE</b>        | 0.17  | 2.77E-01 | 1.00E+00 | 0.05  | 8.73E-01 | 9.85E-01 |
| <b>HSD52</b>       | 0.65  | 5.07E-01 | 1.00E+00 | -0.30 | 8.73E-01 | 9.85E-01 |
| <b>RIMKLB2</b>     | 1.62  | 5.71E-01 | 1.00E+00 | 0.19  | 8.73E-01 | 9.85E-01 |
| <b>TOR1A</b>       | 0.10  | 5.45E-01 | 1.00E+00 | -0.03 | 8.73E-01 | 9.85E-01 |
| <b>MATK</b>        | -1.09 | 6.08E-03 | 4.63E-01 | 0.18  | 8.73E-01 | 9.85E-01 |
| <b>AADA2L2-AS1</b> | -0.20 | 8.45E-01 | 1.00E+00 | 0.15  | 8.73E-01 | 9.85E-01 |
| <b>HAUS2</b>       | 0.01  | 9.60E-01 | 1.00E+00 | -0.02 | 8.73E-01 | 9.85E-01 |
| <b>C4BPB</b>       | -2.40 | 2.50E-01 | 1.00E+00 | -0.18 | 8.73E-01 | 9.85E-01 |
| <b>UGT2B11</b>     | -1.15 | 4.96E-01 | 1.00E+00 | -0.48 | 8.73E-01 | 9.85E-01 |
| <b>DGKG</b>        | 0.05  | 9.19E-01 | 1.00E+00 | 0.13  | 8.73E-01 | 9.85E-01 |
| <b>SLC16A14</b>    | -0.36 | 4.05E-01 | 1.00E+00 | -0.06 | 8.73E-01 | 9.85E-01 |
| <b>ANXA2P2</b>     | 0.23  | 3.59E-01 | 1.00E+00 | -0.09 | 8.73E-01 | 9.85E-01 |
| <b>MIR4263</b>     | -0.33 | 8.33E-01 | 1.00E+00 | -0.15 | 8.73E-01 | 9.85E-01 |
| <b>ARAP2</b>       | -0.01 | 9.85E-01 | 1.00E+00 | 0.07  | 8.73E-01 | 9.85E-01 |
| <b>PAK6</b>        | 0.03  | 9.35E-01 | 1.00E+00 | -0.08 | 8.73E-01 | 9.85E-01 |
| <b>KIF14</b>       | 0.75  | 1.48E-01 | 1.00E+00 | 0.14  | 8.73E-01 | 9.85E-01 |
| <b>PPIAP73</b>     | -1.27 | 6.00E-01 | 1.00E+00 | 0.21  | 8.73E-01 | 9.85E-01 |
| <b>UNC45B</b>      | 1.46  | 4.95E-01 | 1.00E+00 | 0.23  | 8.73E-01 | 9.85E-01 |
| <b>GMPPB</b>       | -0.14 | 5.32E-01 | 1.00E+00 | -0.04 | 8.73E-01 | 9.85E-01 |
| <b>ARHGFE12</b>    | -0.22 | 2.95E-01 | 1.00E+00 | -0.07 | 8.73E-01 | 9.85E-01 |
| <b>AVIL</b>        | 0.07  | 8.69E-01 | 1.00E+00 | -0.07 | 8.73E-01 | 9.85E-01 |
| <b>D2HGDH</b>      | 0.06  | 8.49E-01 | 1.00E+00 | -0.09 | 8.73E-01 | 9.85E-01 |
| <b>EEF1AKMT3</b>   | -0.05 | 8.35E-01 | 1.00E+00 | -0.05 | 8.73E-01 | 9.85E-01 |
| <b>AC087289.2</b>  | -1.91 | 2.36E-01 | 1.00E+00 | 0.21  | 8.73E-01 | 9.85E-01 |
| <b>AC008972.1</b>  | 0.84  | 8.03E-01 | 1.00E+00 | 0.20  | 8.74E-01 | 9.85E-01 |
| <b>EDC4</b>        | -0.08 | 7.64E-01 | 1.00E+00 | -0.12 | 8.74E-01 | 9.85E-01 |
| <b>ALDH7A1</b>     | -0.04 | 8.18E-01 | 1.00E+00 | -0.02 | 8.74E-01 | 9.85E-01 |
| <b>TIMM23B</b>     | -0.08 | 8.63E-01 | 1.00E+00 | 0.04  | 8.74E-01 | 9.85E-01 |
| <b>ARHGAP31</b>    | -0.25 | 1.77E-01 | 1.00E+00 | 0.07  | 8.74E-01 | 9.85E-01 |

|                    |       |          |          |       |          |          |
|--------------------|-------|----------|----------|-------|----------|----------|
| <b>CARMIL1</b>     | -0.13 | 5.94E-01 | 1.00E+00 | 0.05  | 8.74E-01 | 9.85E-01 |
| <b>TBPL1</b>       | 0.13  | 5.26E-01 | 1.00E+00 | -0.05 | 8.74E-01 | 9.85E-01 |
| <b>RPS3P6</b>      | 1.27  | 7.13E-01 | 1.00E+00 | -0.12 | 8.74E-01 | 9.85E-01 |
| <b>CDK9</b>        | -0.15 | 4.94E-01 | 1.00E+00 | -0.08 | 8.74E-01 | 9.85E-01 |
| <b>KLF15</b>       | 0.45  | 5.39E-01 | 1.00E+00 | 0.17  | 8.74E-01 | 9.85E-01 |
| <b>RB1</b>         | -0.18 | 4.87E-01 | 1.00E+00 | -0.03 | 8.74E-01 | 9.85E-01 |
| <b>GDA</b>         | -4.85 | 1.62E-04 | 3.78E-02 | -0.50 | 8.74E-01 | 9.85E-01 |
| <b>XLOC_006303</b> | -2.11 | 7.86E-02 | 1.00E+00 | -0.17 | 8.74E-01 | 9.85E-01 |
| <b>EFNB1</b>       | -0.13 | 6.31E-01 | 1.00E+00 | 0.08  | 8.74E-01 | 9.85E-01 |
| <b>G30008</b>      | 0.01  | 9.95E-01 | 1.00E+00 | 0.25  | 8.74E-01 | 9.85E-01 |
| <b>HSPA9P1</b>     | NA    | NA       | NA       | 0.11  | 8.74E-01 | 9.85E-01 |
| <b>EIF5A</b>       | -0.07 | 7.89E-01 | 1.00E+00 | 0.05  | 8.74E-01 | 9.85E-01 |
| <b>KRT80</b>       | 0.14  | 7.85E-01 | 1.00E+00 | -0.12 | 8.74E-01 | 9.85E-01 |
| <b>AC015712.2</b>  | 0.38  | 3.81E-01 | 1.00E+00 | -0.08 | 8.74E-01 | 9.85E-01 |
| <b>NEK1</b>        | 0.04  | 8.95E-01 | 1.00E+00 | 0.03  | 8.74E-01 | 9.85E-01 |
| <b>AC004232.3</b>  | 1.57  | 1.44E-01 | 1.00E+00 | -0.18 | 8.74E-01 | 9.85E-01 |
| <b>SPIDR</b>       | -0.15 | 5.59E-01 | 1.00E+00 | -0.03 | 8.74E-01 | 9.85E-01 |
| <b>TELO2</b>       | -0.32 | 1.98E-01 | 1.00E+00 | 0.08  | 8.74E-01 | 9.85E-01 |
| <b>AC110792.3</b>  | 3.04  | 1.06E-01 | 1.00E+00 | -0.19 | 8.74E-01 | 9.85E-01 |
| <b>CXADR</b>       | -0.15 | 6.74E-01 | 1.00E+00 | -0.10 | 8.74E-01 | 9.85E-01 |
| <b>ACOT8</b>       | 0.22  | 3.36E-01 | 1.00E+00 | 0.04  | 8.75E-01 | 9.85E-01 |
| <b>RPS26P31</b>    | -0.49 | 7.98E-01 | 1.00E+00 | 0.16  | 8.75E-01 | 9.85E-01 |
| <b>QKI</b>         | 0.04  | 8.33E-01 | 1.00E+00 | -0.05 | 8.75E-01 | 9.85E-01 |
| <b>AC073073.2</b>  | 0.88  | 1.65E-01 | 1.00E+00 | -0.18 | 8.75E-01 | 9.85E-01 |
| <b>SPATA5L1</b>    | -0.18 | 5.88E-01 | 1.00E+00 | -0.08 | 8.75E-01 | 9.85E-01 |
| <b>AC021074.1</b>  | 3.76  | 7.15E-02 | 1.00E+00 | 0.11  | 8.75E-01 | 9.85E-01 |
| <b>R3HCC1</b>      | -0.14 | 5.85E-01 | 1.00E+00 | -0.04 | 8.75E-01 | 9.85E-01 |
| <b>PLCG1-AS1</b>   | -0.90 | 4.25E-01 | 1.00E+00 | -0.13 | 8.75E-01 | 9.85E-01 |
| <b>GMDS</b>        | -0.33 | 2.74E-01 | 1.00E+00 | 0.04  | 8.75E-01 | 9.85E-01 |
| <b>XLOC_009765</b> | -0.19 | 8.48E-01 | 1.00E+00 | -0.12 | 8.75E-01 | 9.85E-01 |
| <b>CSDE1</b>       | 0.13  | 4.21E-01 | 1.00E+00 | -0.03 | 8.75E-01 | 9.85E-01 |
| <b>WRNIP1</b>      | 0.01  | 9.73E-01 | 1.00E+00 | -0.08 | 8.75E-01 | 9.85E-01 |

|                    |       |          |          |       |          |          |
|--------------------|-------|----------|----------|-------|----------|----------|
| <b>LDHAP2</b>      | -2.60 | 2.17E-01 | 1.00E+00 | -0.13 | 8.75E-01 | 9.85E-01 |
| <b>SNRNP70</b>     | -0.29 | 2.27E-01 | 1.00E+00 | 0.13  | 8.75E-01 | 9.85E-01 |
| <b>ANAPC15</b>     | -0.31 | 4.46E-01 | 1.00E+00 | -0.08 | 8.75E-01 | 9.85E-01 |
| <b>MIR210HG</b>    | 0.23  | 5.16E-01 | 1.00E+00 | -0.07 | 8.75E-01 | 9.85E-01 |
| <b>ADRA1B</b>      | 0.54  | 5.19E-01 | 1.00E+00 | -0.24 | 8.75E-01 | 9.85E-01 |
| <b>NCBP2-AS2</b>   | -0.28 | 2.94E-01 | 1.00E+00 | -0.05 | 8.75E-01 | 9.85E-01 |
| <b>ZNF324</b>      | -0.06 | 7.68E-01 | 1.00E+00 | -0.07 | 8.75E-01 | 9.85E-01 |
| <b>NAA20</b>       | -0.17 | 4.72E-01 | 1.00E+00 | -0.05 | 8.75E-01 | 9.85E-01 |
| <b>AC131649.2</b>  | -0.83 | 3.96E-01 | 1.00E+00 | 0.15  | 8.75E-01 | 9.85E-01 |
| <b>POFUT1</b>      | 0.26  | 2.59E-01 | 1.00E+00 | 0.07  | 8.75E-01 | 9.85E-01 |
| <b>FECH</b>        | 0.16  | 4.75E-01 | 1.00E+00 | 0.03  | 8.75E-01 | 9.85E-01 |
| <b>NDUFB4P11</b>   | -3.02 | 4.15E-02 | 1.00E+00 | -0.19 | 8.75E-01 | 9.85E-01 |
| <b>TMPRSS3</b>     | 0.65  | 2.83E-01 | 1.00E+00 | 0.15  | 8.75E-01 | 9.85E-01 |
| <b>APRT</b>        | -0.17 | 5.49E-01 | 1.00E+00 | 0.05  | 8.75E-01 | 9.85E-01 |
| <b>ZBTB11-AS1</b>  | 0.68  | 9.31E-02 | 1.00E+00 | 0.08  | 8.75E-01 | 9.85E-01 |
| <b>PF4V1</b>       | -1.18 | 7.32E-01 | 1.00E+00 | 0.27  | 8.75E-01 | 9.85E-01 |
| <b>G26553</b>      | 0.97  | 1.77E-01 | 1.00E+00 | 0.18  | 8.75E-01 | 9.85E-01 |
| <b>MRPS22</b>      | -0.04 | 8.25E-01 | 1.00E+00 | -0.03 | 8.75E-01 | 9.85E-01 |
| <b>ZKSCAN7-AS1</b> | -1.72 | 2.55E-01 | 1.00E+00 | 0.15  | 8.75E-01 | 9.85E-01 |
| <b>RPS28P7</b>     | 0.07  | 8.29E-01 | 1.00E+00 | -0.06 | 8.76E-01 | 9.85E-01 |
| <b>PSENE1</b>      | 0.10  | 7.80E-01 | 1.00E+00 | -0.07 | 8.76E-01 | 9.85E-01 |
| <b>AL139424.3</b>  | -0.67 | 2.58E-01 | 1.00E+00 | -0.14 | 8.76E-01 | 9.85E-01 |
| <b>PAXBP1-AS1</b>  | -0.47 | 4.97E-01 | 1.00E+00 | 0.11  | 8.76E-01 | 9.85E-01 |
| <b>GLYATL1P1</b>   | -0.79 | 6.02E-01 | 1.00E+00 | 0.16  | 8.76E-01 | 9.85E-01 |
| <b>IL17B</b>       | -1.17 | 9.21E-02 | 1.00E+00 | 0.09  | 8.76E-01 | 9.85E-01 |
| <b>VPS50</b>       | 0.33  | 2.93E-01 | 1.00E+00 | -0.05 | 8.76E-01 | 9.85E-01 |
| <b>G2592</b>       | -0.52 | 6.79E-01 | 1.00E+00 | 0.15  | 8.76E-01 | 9.85E-01 |
| <b>Z98884.1</b>    | -3.44 | 1.39E-01 | 1.00E+00 | 0.13  | 8.76E-01 | 9.85E-01 |
| <b>XLOC_011365</b> | 0.32  | 8.88E-01 | 1.00E+00 | -0.18 | 8.76E-01 | 9.85E-01 |
| <b>NIPAL1</b>      | 0.30  | 5.79E-01 | 1.00E+00 | 0.08  | 8.76E-01 | 9.85E-01 |
| <b>ESRRB</b>       | -4.67 | 2.78E-03 | 2.73E-01 | -0.18 | 8.76E-01 | 9.85E-01 |
| <b>ASAP2</b>       | -0.19 | 4.50E-01 | 1.00E+00 | -0.06 | 8.76E-01 | 9.85E-01 |

|                   |       |          |          |       |          |          |
|-------------------|-------|----------|----------|-------|----------|----------|
| <b>AL135786.1</b> | 1.19  | 2.89E-01 | 1.00E+00 | -0.17 | 8.76E-01 | 9.85E-01 |
| <b>AC141586.1</b> | -0.73 | 9.16E-02 | 1.00E+00 | -0.06 | 8.76E-01 | 9.85E-01 |
| <b>SEC24C</b>     | 0.02  | 9.26E-01 | 1.00E+00 | 0.08  | 8.76E-01 | 9.85E-01 |
| <b>CCDC177</b>    | -2.35 | 5.22E-02 | 1.00E+00 | 0.22  | 8.76E-01 | 9.85E-01 |
| <b>SHISA3</b>     | 1.19  | 1.89E-01 | 1.00E+00 | -0.13 | 8.76E-01 | 9.85E-01 |
| <b>C16orf58</b>   | -0.29 | 1.21E-01 | 1.00E+00 | 0.07  | 8.76E-01 | 9.85E-01 |
| <b>AL121917.1</b> | -0.87 | 1.72E-01 | 1.00E+00 | -0.12 | 8.76E-01 | 9.85E-01 |
| <b>SSPN</b>       | 0.50  | 2.39E-01 | 1.00E+00 | -0.04 | 8.76E-01 | 9.85E-01 |
| <b>AC103810.3</b> | -0.30 | 7.11E-01 | 1.00E+00 | 0.49  | 8.77E-01 | 9.85E-01 |
| <b>MAST4-IT1</b>  | NA    | NA       | NA       | -0.35 | 8.77E-01 | 9.85E-01 |
| <b>ZNF292</b>     | -0.11 | 5.97E-01 | 1.00E+00 | -0.05 | 8.77E-01 | 9.85E-01 |
| <b>NBPF11</b>     | -0.23 | 7.09E-01 | 1.00E+00 | -0.06 | 8.77E-01 | 9.85E-01 |
| <b>NFIL3</b>      | -0.27 | 5.70E-01 | 1.00E+00 | -0.09 | 8.77E-01 | 9.85E-01 |
| <b>AP000437.1</b> | 0.36  | 7.80E-01 | 1.00E+00 | -0.11 | 8.77E-01 | 9.85E-01 |
| <b>TATDN1P1</b>   | NA    | NA       | NA       | 0.11  | 8.77E-01 | 9.85E-01 |
| <b>AL031719.2</b> | -1.04 | 4.96E-01 | 1.00E+00 | -0.11 | 8.77E-01 | 9.85E-01 |
| <b>MARCKSL1</b>   | -0.45 | 2.35E-01 | 1.00E+00 | 0.08  | 8.77E-01 | 9.85E-01 |
| <b>GRID2IP</b>    | 0.13  | 7.81E-01 | 1.00E+00 | -0.08 | 8.77E-01 | 9.85E-01 |
| <b>TCHHL1</b>     | -5.34 | 1.10E-01 | 1.00E+00 | -0.49 | 8.77E-01 | 9.85E-01 |
| <b>CHML</b>       | -0.61 | 3.12E-02 | 1.00E+00 | -0.07 | 8.77E-01 | 9.85E-01 |
| <b>IGKJ4</b>      | 1.34  | 6.98E-01 | 1.00E+00 | 0.50  | 8.77E-01 | 9.85E-01 |
| <b>AHCTF1</b>     | 0.03  | 8.90E-01 | 1.00E+00 | -0.06 | 8.77E-01 | 9.85E-01 |
| <b>SON</b>        | -0.28 | 1.71E-01 | 1.00E+00 | -0.04 | 8.77E-01 | 9.85E-01 |
| <b>ATP6V1B2</b>   | 0.27  | 2.38E-01 | 1.00E+00 | 0.05  | 8.77E-01 | 9.85E-01 |
| <b>NPTX1</b>      | -0.77 | 3.23E-01 | 1.00E+00 | -0.17 | 8.77E-01 | 9.85E-01 |
| <b>MAP3K10</b>    | -0.70 | 9.36E-03 | 6.05E-01 | -0.48 | 8.77E-01 | 9.85E-01 |
| <b>SMPD5</b>      | -0.92 | 3.61E-01 | 1.00E+00 | 0.20  | 8.77E-01 | 9.85E-01 |
| <b>AC005082.1</b> | 0.62  | 3.53E-01 | 1.00E+00 | 0.11  | 8.77E-01 | 9.85E-01 |
| <b>POLR2D</b>     | 0.06  | 7.33E-01 | 1.00E+00 | -0.04 | 8.77E-01 | 9.85E-01 |
| <b>C15orf56</b>   | 0.15  | 8.72E-01 | 1.00E+00 | 0.14  | 8.77E-01 | 9.85E-01 |
| <b>DIP2A</b>      | -0.12 | 5.39E-01 | 1.00E+00 | 0.05  | 8.77E-01 | 9.85E-01 |
| <b>AC007834.1</b> | 1.12  | 2.60E-01 | 1.00E+00 | -0.16 | 8.77E-01 | 9.85E-01 |

|             |       |          |          |       |          |          |
|-------------|-------|----------|----------|-------|----------|----------|
| OSMR-AS1    | 0.17  | 7.54E-01 | 1.00E+00 | -0.08 | 8.77E-01 | 9.85E-01 |
| ZDHHC17     | 0.23  | 4.22E-01 | 1.00E+00 | -0.05 | 8.77E-01 | 9.85E-01 |
| NPRL2       | -0.06 | 8.22E-01 | 1.00E+00 | 0.05  | 8.77E-01 | 9.85E-01 |
| VSTM5       | -1.35 | 5.49E-02 | 1.00E+00 | -0.17 | 8.77E-01 | 9.85E-01 |
| PCDHGA11    | -0.30 | 3.87E-01 | 1.00E+00 | -0.08 | 8.78E-01 | 9.85E-01 |
| DLEC1       | 1.15  | 1.63E-01 | 1.00E+00 | -0.18 | 8.78E-01 | 9.85E-01 |
| TFG         | -0.11 | 5.67E-01 | 1.00E+00 | 0.03  | 8.78E-01 | 9.85E-01 |
| G3707       | 0.09  | 8.98E-01 | 1.00E+00 | 0.11  | 8.78E-01 | 9.85E-01 |
| XLOC_005889 | 0.67  | 5.47E-01 | 1.00E+00 | 0.14  | 8.78E-01 | 9.85E-01 |
| SHOC2       | 0.04  | 8.65E-01 | 1.00E+00 | -0.04 | 8.78E-01 | 9.85E-01 |
| EEFSEC      | -0.27 | 2.43E-01 | 1.00E+00 | 0.03  | 8.78E-01 | 9.85E-01 |
| NDUFB1P1    | 0.25  | 9.42E-01 | 1.00E+00 | -0.12 | 8.78E-01 | 9.85E-01 |
| BTG3        | 0.18  | 4.25E-01 | 1.00E+00 | -0.04 | 8.78E-01 | 9.85E-01 |
| ZNF385C     | -0.24 | 6.96E-01 | 1.00E+00 | -0.14 | 8.78E-01 | 9.85E-01 |
| MTMR9       | 0.29  | 2.59E-01 | 1.00E+00 | -0.03 | 8.78E-01 | 9.85E-01 |
| DSCAML1     | -0.29 | 7.63E-01 | 1.00E+00 | 0.22  | 8.78E-01 | 9.85E-01 |
| PCDHA10     | -0.09 | 9.40E-01 | 1.00E+00 | -0.12 | 8.78E-01 | 9.85E-01 |
| ARL4D       | -0.71 | 1.70E-01 | 1.00E+00 | 0.05  | 8.78E-01 | 9.85E-01 |
| DUSP23      | -0.28 | 1.51E-01 | 1.00E+00 | -0.04 | 8.78E-01 | 9.85E-01 |
| KRT17P3     | 0.00  | 1.00E+00 | NA       | -0.18 | 8.78E-01 | 9.85E-01 |
| MESTIT1     | 0.79  | 7.67E-01 | 1.00E+00 | 0.16  | 8.78E-01 | 9.85E-01 |
| AC078881.1  | -0.48 | 4.61E-01 | 1.00E+00 | -0.08 | 8.78E-01 | 9.85E-01 |
| RNF115      | -0.04 | 8.59E-01 | 1.00E+00 | 0.05  | 8.78E-01 | 9.85E-01 |
| ZNF337      | -0.32 | 7.44E-01 | 1.00E+00 | 0.07  | 8.78E-01 | 9.85E-01 |
| RPL41P5     | -0.48 | 3.85E-01 | 1.00E+00 | 0.07  | 8.78E-01 | 9.85E-01 |
| XLOC_002876 | 0.35  | 9.19E-01 | 1.00E+00 | -0.29 | 8.78E-01 | 9.85E-01 |
| AC007191.1  | -0.06 | 9.25E-01 | 1.00E+00 | 0.14  | 8.78E-01 | 9.85E-01 |
| RAPSN       | -2.59 | 7.68E-02 | 1.00E+00 | 0.15  | 8.78E-01 | 9.85E-01 |
| IFNK        | -2.46 | 4.70E-01 | 1.00E+00 | 0.49  | 8.79E-01 | 9.85E-01 |
| AC016596.1  | 0.18  | 6.85E-01 | 1.00E+00 | 0.08  | 8.79E-01 | 9.85E-01 |
| DPH2        | -0.23 | 3.03E-01 | 1.00E+00 | 0.03  | 8.79E-01 | 9.85E-01 |
| AL135910.1  | 0.26  | 6.44E-01 | 1.00E+00 | 0.08  | 8.79E-01 | 9.85E-01 |



|                    |       |          |          |       |          |          |
|--------------------|-------|----------|----------|-------|----------|----------|
| <b>MBTPS1</b>      | -0.01 | 9.44E-01 | 1.00E+00 | 0.04  | 8.79E-01 | 9.85E-01 |
| <b>TRMU</b>        | 0.25  | 4.00E-01 | 1.00E+00 | 0.03  | 8.79E-01 | 9.85E-01 |
| <b>LINC00337</b>   | -2.97 | 1.63E-01 | 1.00E+00 | 0.22  | 8.79E-01 | 9.85E-01 |
| <b>AC010890.1</b>  | -0.61 | 5.75E-01 | 1.00E+00 | -0.15 | 8.79E-01 | 9.85E-01 |
| <b>CRLF1</b>       | -0.94 | 1.95E-02 | 8.74E-01 | -0.45 | 8.79E-01 | 9.85E-01 |
| <b>ACER3</b>       | -0.10 | 7.81E-01 | 1.00E+00 | -0.05 | 8.79E-01 | 9.85E-01 |
| <b>AKT1</b>        | -0.17 | 4.33E-01 | 1.00E+00 | -0.09 | 8.79E-01 | 9.85E-01 |
| <b>ZNF354A</b>     | 0.05  | 8.76E-01 | 1.00E+00 | -0.03 | 8.79E-01 | 9.85E-01 |
| <b>BAD</b>         | 0.31  | 3.94E-01 | 1.00E+00 | 0.08  | 8.79E-01 | 9.85E-01 |
| <b>FAM171A1</b>    | 0.26  | 5.34E-01 | 1.00E+00 | 0.09  | 8.79E-01 | 9.85E-01 |
| <b>MYOZ1</b>       | -0.67 | 3.63E-01 | 1.00E+00 | 0.10  | 8.79E-01 | 9.85E-01 |
| <b>RPL38</b>       | -0.03 | 9.21E-01 | 1.00E+00 | 0.03  | 8.79E-01 | 9.85E-01 |
| <b>KCNH2</b>       | -0.35 | 7.41E-01 | 1.00E+00 | -0.15 | 8.80E-01 | 9.85E-01 |
| <b>LINC01750</b>   | -0.69 | 1.30E-01 | 1.00E+00 | -0.08 | 8.80E-01 | 9.86E-01 |
| <b>AC140134.1</b>  | -0.04 | 9.56E-01 | 1.00E+00 | -0.14 | 8.80E-01 | 9.86E-01 |
| <b>AC016712.1</b>  | NA    | NA       | NA       | -0.14 | 8.80E-01 | 9.86E-01 |
| <b>HERC3</b>       | 0.40  | 9.49E-02 | 1.00E+00 | 0.02  | 8.80E-01 | 9.86E-01 |
| <b>TMX4</b>        | 0.35  | 2.56E-01 | 1.00E+00 | 0.04  | 8.80E-01 | 9.86E-01 |
| <b>AL162595.1</b>  | -0.18 | 8.51E-01 | 1.00E+00 | 0.11  | 8.80E-01 | 9.86E-01 |
| <b>RPL34P6</b>     | -0.54 | 8.76E-01 | 1.00E+00 | 0.15  | 8.80E-01 | 9.86E-01 |
| <b>RPS21</b>       | -0.08 | 7.97E-01 | 1.00E+00 | 0.04  | 8.80E-01 | 9.86E-01 |
| <b>TRBV4-2</b>     | -2.42 | 2.71E-01 | 1.00E+00 | 0.18  | 8.80E-01 | 9.86E-01 |
| <b>IL18</b>        | 0.07  | 8.75E-01 | 1.00E+00 | -0.08 | 8.80E-01 | 9.86E-01 |
| <b>SMNDC1</b>      | 0.25  | 2.71E-01 | 1.00E+00 | -0.03 | 8.80E-01 | 9.86E-01 |
| <b>ENTHD1</b>      | -2.23 | 1.69E-01 | 1.00E+00 | 0.19  | 8.80E-01 | 9.86E-01 |
| <b>LINC00472</b>   | 0.76  | 3.40E-01 | 1.00E+00 | -0.13 | 8.80E-01 | 9.86E-01 |
| <b>PCNT</b>        | -0.36 | 2.02E-01 | 1.00E+00 | 0.05  | 8.80E-01 | 9.86E-01 |
| <b>LINC02519</b>   | 1.97  | 1.26E-01 | 1.00E+00 | -0.28 | 8.80E-01 | 9.86E-01 |
| <b>XLOC_006964</b> | -1.23 | 4.07E-01 | 1.00E+00 | 0.19  | 8.80E-01 | 9.86E-01 |
| <b>PLCD4</b>       | 0.13  | 6.98E-01 | 1.00E+00 | 0.08  | 8.80E-01 | 9.86E-01 |
| <b>HOXB-AS3</b>    | 0.42  | 6.01E-01 | 1.00E+00 | 0.10  | 8.80E-01 | 9.86E-01 |
| <b>LRBA</b>        | -0.06 | 8.16E-01 | 1.00E+00 | 0.06  | 8.80E-01 | 9.86E-01 |

|                   |       |          |          |       |          |          |
|-------------------|-------|----------|----------|-------|----------|----------|
| <b>AC087203.3</b> | -1.77 | 1.56E-01 | 1.00E+00 | -0.14 | 8.81E-01 | 9.86E-01 |
| <b>AL121574.1</b> | 1.11  | 7.45E-01 | 1.00E+00 | 0.19  | 8.81E-01 | 9.86E-01 |
| <b>HDAC2-AS2</b>  | 0.68  | 6.41E-01 | 1.00E+00 | -0.13 | 8.81E-01 | 9.86E-01 |
| <b>CDNF</b>       | -0.55 | 2.23E-01 | 1.00E+00 | 0.08  | 8.81E-01 | 9.86E-01 |
| <b>AC012254.3</b> | -1.52 | 6.60E-01 | 1.00E+00 | 0.19  | 8.81E-01 | 9.86E-01 |
| <b>CPPED1</b>     | 0.00  | 9.93E-01 | 1.00E+00 | 0.03  | 8.81E-01 | 9.86E-01 |
| <b>LCE5A</b>      | 0.85  | 2.89E-01 | 1.00E+00 | -0.14 | 8.81E-01 | 9.86E-01 |
| <b>CPTP</b>       | -0.23 | 3.03E-01 | 1.00E+00 | 0.09  | 8.81E-01 | 9.86E-01 |
| <b>TMEM233</b>    | -2.31 | 6.79E-02 | 1.00E+00 | -0.12 | 8.81E-01 | 9.86E-01 |
| <b>CCDC66</b>     | -0.01 | 9.81E-01 | 1.00E+00 | -0.05 | 8.81E-01 | 9.86E-01 |
| <b>UBE2FP3</b>    | 0.75  | 4.80E-01 | 1.00E+00 | -0.16 | 8.81E-01 | 9.86E-01 |
| <b>AC004596.1</b> | -1.99 | 2.69E-01 | 1.00E+00 | 0.18  | 8.81E-01 | 9.86E-01 |
| <b>ZNF146</b>     | -0.03 | 8.63E-01 | 1.00E+00 | -0.04 | 8.81E-01 | 9.86E-01 |
| <b>LINC00843</b>  | -0.52 | 5.61E-01 | 1.00E+00 | 0.04  | 8.81E-01 | 9.86E-01 |
| <b>AC107074.1</b> | 0.86  | 3.27E-01 | 1.00E+00 | -0.13 | 8.81E-01 | 9.86E-01 |
| <b>RPL34P31</b>   | NA    | NA       | NA       | -0.13 | 8.81E-01 | 9.86E-01 |
| <b>RNASEK</b>     | -2.38 | 7.50E-02 | 1.00E+00 | 0.08  | 8.81E-01 | 9.86E-01 |
| <b>AC010173.1</b> | 0.42  | 5.68E-01 | 1.00E+00 | 0.19  | 8.81E-01 | 9.86E-01 |
| <b>KIF5B</b>      | 0.12  | 5.77E-01 | 1.00E+00 | -0.02 | 8.82E-01 | 9.86E-01 |
| <b>PAGR1</b>      | 0.36  | 2.65E-01 | 1.00E+00 | 0.07  | 8.82E-01 | 9.86E-01 |
| <b>REEP2</b>      | -0.45 | 3.46E-01 | 1.00E+00 | -0.11 | 8.82E-01 | 9.86E-01 |
| <b>SMPD4P1</b>    | -3.46 | 1.86E-01 | 1.00E+00 | -0.22 | 8.82E-01 | 9.86E-01 |
| <b>RAB1A</b>      | 0.10  | 5.06E-01 | 1.00E+00 | 0.02  | 8.82E-01 | 9.86E-01 |
| <b>EVPL</b>       | -0.17 | 7.36E-01 | 1.00E+00 | -0.11 | 8.82E-01 | 9.86E-01 |
| <b>AL024498.1</b> | 1.34  | 2.03E-01 | 1.00E+00 | 0.13  | 8.82E-01 | 9.86E-01 |
| <b>P3H2-AS1</b>   | -0.67 | 5.03E-01 | 1.00E+00 | -0.15 | 8.82E-01 | 9.86E-01 |
| <b>ATP6V1D</b>    | 0.13  | 6.09E-01 | 1.00E+00 | -0.04 | 8.82E-01 | 9.86E-01 |
| <b>TMEM104</b>    | -0.27 | 2.98E-01 | 1.00E+00 | 0.08  | 8.82E-01 | 9.86E-01 |
| <b>LDHAP5</b>     | NA    | NA       | NA       | 0.10  | 8.82E-01 | 9.86E-01 |
| <b>TMEM121</b>    | -0.54 | 1.09E-01 | 1.00E+00 | 0.12  | 8.82E-01 | 9.86E-01 |
| <b>NTNG2</b>      | -0.18 | 5.95E-01 | 1.00E+00 | 0.44  | 8.82E-01 | 9.86E-01 |
| <b>AFTPH</b>      | 0.13  | 6.20E-01 | 1.00E+00 | -0.04 | 8.82E-01 | 9.86E-01 |

|             |       |          |          |       |          |          |
|-------------|-------|----------|----------|-------|----------|----------|
| PGAM4       | -0.48 | 7.66E-01 | 1.00E+00 | 0.08  | 8.82E-01 | 9.86E-01 |
| XLOC_005079 | 0.27  | 7.49E-01 | 1.00E+00 | -0.15 | 8.82E-01 | 9.86E-01 |
| KRT81       | -1.54 | 6.30E-01 | 1.00E+00 | -0.47 | 8.82E-01 | 9.86E-01 |
| AC092747.2  | 1.92  | 4.65E-01 | 1.00E+00 | -0.11 | 8.82E-01 | 9.86E-01 |
| TATDN2P2    | 0.50  | 2.72E-01 | 1.00E+00 | 0.12  | 8.82E-01 | 9.86E-01 |
| AC096708.3  | -1.76 | 6.09E-01 | 1.00E+00 | 0.34  | 8.82E-01 | 9.86E-01 |
| G30001      | 0.59  | 4.26E-01 | 1.00E+00 | 0.14  | 8.82E-01 | 9.86E-01 |
| U73166.1    | 1.36  | 3.84E-01 | 1.00E+00 | 0.17  | 8.82E-01 | 9.86E-01 |
| PFKL        | 0.01  | 9.47E-01 | 1.00E+00 | 0.05  | 8.82E-01 | 9.86E-01 |
| PLAC1       | -0.05 | 9.66E-01 | 1.00E+00 | 0.16  | 8.82E-01 | 9.86E-01 |
| LOH12CR2    | 0.08  | 9.01E-01 | 1.00E+00 | -0.08 | 8.82E-01 | 9.86E-01 |
| FBXO43      | 0.60  | 3.91E-01 | 1.00E+00 | -0.15 | 8.82E-01 | 9.86E-01 |
| MAPK8IP1P2  | -4.00 | 1.79E-01 | 1.00E+00 | 0.48  | 8.82E-01 | 9.86E-01 |
| AC110769.2  | 0.32  | 8.65E-01 | 1.00E+00 | 0.16  | 8.82E-01 | 9.86E-01 |
| NUDT6       | 0.11  | 7.66E-01 | 1.00E+00 | -0.05 | 8.83E-01 | 9.86E-01 |
| FOXP3       | -0.57 | 2.97E-01 | 1.00E+00 | 0.46  | 8.83E-01 | 9.86E-01 |
| CPSF2       | -0.07 | 7.54E-01 | 1.00E+00 | -0.03 | 8.83E-01 | 9.86E-01 |
| AC090587.2  | -1.73 | 3.64E-03 | 3.27E-01 | 0.11  | 8.83E-01 | 9.86E-01 |
| PPP1R13L    | -0.40 | 3.69E-01 | 1.00E+00 | 0.07  | 8.83E-01 | 9.86E-01 |
| CLEC14A     | 0.22  | 6.36E-01 | 1.00E+00 | 0.07  | 8.83E-01 | 9.86E-01 |
| EIF4HP1     | -0.22 | 6.83E-01 | 1.00E+00 | -0.06 | 8.83E-01 | 9.86E-01 |
| IKZF5       | 0.06  | 7.89E-01 | 1.00E+00 | -0.05 | 8.83E-01 | 9.86E-01 |
| CAPN10      | -0.15 | 6.02E-01 | 1.00E+00 | 0.10  | 8.83E-01 | 9.86E-01 |
| LIX1L       | 0.31  | 4.32E-01 | 1.00E+00 | -0.05 | 8.83E-01 | 9.86E-01 |
| TICRR       | -0.46 | 2.28E-01 | 1.00E+00 | 0.18  | 8.83E-01 | 9.86E-01 |
| FLII        | -0.14 | 4.15E-01 | 1.00E+00 | 0.05  | 8.83E-01 | 9.86E-01 |
| XLOC_005778 | 1.83  | 3.02E-01 | 1.00E+00 | -0.12 | 8.83E-01 | 9.86E-01 |
| AC120049.1  | -0.03 | 9.44E-01 | 1.00E+00 | 0.12  | 8.83E-01 | 9.86E-01 |
| NSF         | -0.12 | 5.46E-01 | 1.00E+00 | -0.03 | 8.83E-01 | 9.86E-01 |
| LINC01116   | 0.11  | 7.56E-01 | 1.00E+00 | -0.06 | 8.83E-01 | 9.86E-01 |
| PPP1R32     | -0.39 | 5.22E-01 | 1.00E+00 | 0.09  | 8.83E-01 | 9.86E-01 |
| ZNF34       | 0.31  | 2.37E-01 | 1.00E+00 | -0.05 | 8.83E-01 | 9.86E-01 |

|                   |       |          |          |       |          |          |
|-------------------|-------|----------|----------|-------|----------|----------|
| <b>PMS2P3</b>     | -0.74 | 1.99E-01 | 1.00E+00 | 0.11  | 8.83E-01 | 9.86E-01 |
| <b>KIDINS220</b>  | -0.06 | 7.15E-01 | 1.00E+00 | 0.05  | 8.83E-01 | 9.86E-01 |
| <b>AC004554.2</b> | -0.96 | 4.67E-01 | 1.00E+00 | -0.17 | 8.83E-01 | 9.86E-01 |
| <b>TBC1D13</b>    | 0.42  | 1.62E-01 | 1.00E+00 | 0.07  | 8.83E-01 | 9.86E-01 |
| <b>MRPL14</b>     | 0.01  | 9.63E-01 | 1.00E+00 | 0.04  | 8.83E-01 | 9.86E-01 |
| <b>AL512598.2</b> | NA    | NA       | NA       | 0.15  | 8.83E-01 | 9.86E-01 |
| <b>VWA2</b>       | -0.10 | 7.56E-01 | 1.00E+00 | 0.07  | 8.83E-01 | 9.86E-01 |
| <b>DCTN2</b>      | -0.19 | 4.28E-01 | 1.00E+00 | -0.02 | 8.83E-01 | 9.86E-01 |
| <b>AL627230.4</b> | 0.19  | 8.59E-01 | 1.00E+00 | 0.09  | 8.83E-01 | 9.86E-01 |
| <b>PNISR</b>      | 0.06  | 7.77E-01 | 1.00E+00 | 0.03  | 8.84E-01 | 9.86E-01 |
| <b>CUX2</b>       | 1.19  | 2.69E-01 | 1.00E+00 | 0.46  | 8.84E-01 | 9.86E-01 |
| <b>LNX1-AS1</b>   | -1.52 | 6.60E-01 | 1.00E+00 | -0.17 | 8.84E-01 | 9.86E-01 |
| <b>AC133785.1</b> | -0.10 | 8.60E-01 | 1.00E+00 | 0.15  | 8.84E-01 | 9.86E-01 |
| <b>RPL37P2</b>    | -0.63 | 4.63E-01 | 1.00E+00 | 0.12  | 8.84E-01 | 9.86E-01 |
| <b>XYLT2</b>      | -0.11 | 5.66E-01 | 1.00E+00 | 0.04  | 8.84E-01 | 9.86E-01 |
| <b>GCSAM</b>      | -0.20 | 6.05E-01 | 1.00E+00 | -0.06 | 8.84E-01 | 9.86E-01 |
| <b>MTMR11</b>     | 0.10  | 7.63E-01 | 1.00E+00 | 0.04  | 8.84E-01 | 9.86E-01 |
| <b>CYP46A1</b>    | 0.45  | 6.56E-01 | 1.00E+00 | -0.10 | 8.84E-01 | 9.86E-01 |
| <b>RBM8B</b>      | -0.59 | 7.57E-01 | 1.00E+00 | -0.08 | 8.84E-01 | 9.86E-01 |
| <b>VKORC1</b>     | 0.43  | 4.97E-01 | 1.00E+00 | -0.08 | 8.84E-01 | 9.86E-01 |
| <b>RPS6KL1</b>    | -0.64 | 2.17E-01 | 1.00E+00 | -0.10 | 8.84E-01 | 9.86E-01 |
| <b>SUGT1P1</b>    | -1.06 | 2.02E-01 | 1.00E+00 | 0.15  | 8.84E-01 | 9.86E-01 |
| <b>WDR77</b>      | 0.17  | 5.64E-01 | 1.00E+00 | 0.03  | 8.84E-01 | 9.86E-01 |
| <b>AL132656.3</b> | -0.56 | 8.73E-01 | 1.00E+00 | 0.14  | 8.84E-01 | 9.86E-01 |
| <b>CCR6</b>       | 1.27  | 6.83E-01 | 1.00E+00 | -0.14 | 8.84E-01 | 9.86E-01 |
| <b>AC008555.8</b> | -0.75 | 5.09E-01 | 1.00E+00 | 0.12  | 8.84E-01 | 9.86E-01 |
| <b>CCM2L</b>      | 0.29  | 5.61E-01 | 1.00E+00 | -0.13 | 8.84E-01 | 9.86E-01 |
| <b>AC074194.1</b> | -3.07 | 2.41E-01 | 1.00E+00 | 0.16  | 8.84E-01 | 9.86E-01 |
| <b>TRIM72</b>     | -0.81 | 3.48E-01 | 1.00E+00 | -0.43 | 8.84E-01 | 9.86E-01 |
| <b>PCF11</b>      | -0.07 | 8.40E-01 | 1.00E+00 | -0.03 | 8.84E-01 | 9.86E-01 |
| <b>CHGA</b>       | -4.39 | 2.14E-12 | 1.47E-09 | -0.17 | 8.85E-01 | 9.86E-01 |
| <b>AC090772.4</b> | 1.37  | 3.19E-01 | 1.00E+00 | -0.12 | 8.85E-01 | 9.86E-01 |

|                   |       |          |          |       |          |          |
|-------------------|-------|----------|----------|-------|----------|----------|
| <b>AC003071.1</b> | -0.05 | 9.88E-01 | 1.00E+00 | -0.12 | 8.85E-01 | 9.86E-01 |
| <b>NAT1</b>       | 0.47  | 2.08E-01 | 1.00E+00 | 0.05  | 8.85E-01 | 9.86E-01 |
| <b>NAMPTP1</b>    | -1.32 | 2.14E-01 | 1.00E+00 | 0.07  | 8.85E-01 | 9.86E-01 |
| <b>IMP4</b>       | -0.07 | 6.21E-01 | 1.00E+00 | 0.03  | 8.85E-01 | 9.86E-01 |
| <b>ZNF575</b>     | 0.15  | 7.22E-01 | 1.00E+00 | -0.07 | 8.85E-01 | 9.86E-01 |
| <b>DDX10P1</b>    | 1.47  | 5.15E-01 | 1.00E+00 | -0.19 | 8.85E-01 | 9.86E-01 |
| <b>EDARADD</b>    | -0.42 | 2.40E-01 | 1.00E+00 | -0.08 | 8.85E-01 | 9.86E-01 |
| <b>AL021937.2</b> | 1.25  | 3.44E-01 | 1.00E+00 | 0.10  | 8.85E-01 | 9.86E-01 |
| <b>DEF6</b>       | -0.15 | 6.05E-01 | 1.00E+00 | 0.06  | 8.85E-01 | 9.86E-01 |
| <b>ZNF710-AS1</b> | -0.01 | 9.82E-01 | 1.00E+00 | 0.06  | 8.85E-01 | 9.86E-01 |
| <b>ZNF766</b>     | 0.02  | 9.28E-01 | 1.00E+00 | -0.05 | 8.85E-01 | 9.86E-01 |
| <b>TCP10L</b>     | 0.09  | 9.38E-01 | 1.00E+00 | 0.12  | 8.85E-01 | 9.86E-01 |
| <b>LRRC55</b>     | 0.00  | 9.96E-01 | 1.00E+00 | 0.22  | 8.85E-01 | 9.86E-01 |
| <b>AC044849.1</b> | -1.06 | 6.77E-01 | 1.00E+00 | 0.12  | 8.85E-01 | 9.86E-01 |
| <b>RPL3P7</b>     | -3.06 | 2.59E-01 | 1.00E+00 | -0.12 | 8.85E-01 | 9.86E-01 |
| <b>AC005840.2</b> | -1.05 | 4.26E-01 | 1.00E+00 | 0.16  | 8.85E-01 | 9.86E-01 |
| <b>AC133644.2</b> | 1.79  | 2.65E-01 | 1.00E+00 | -0.16 | 8.85E-01 | 9.86E-01 |
| <b>ZNF57</b>      | -0.21 | 6.84E-01 | 1.00E+00 | 0.08  | 8.85E-01 | 9.86E-01 |
| <b>KIAA0586</b>   | 0.00  | 9.99E-01 | 1.00E+00 | 0.03  | 8.85E-01 | 9.86E-01 |
| <b>TMEM132A</b>   | -0.38 | 4.83E-01 | 1.00E+00 | 0.45  | 8.85E-01 | 9.86E-01 |
| <b>PABPC1P3</b>   | -1.81 | 3.13E-01 | 1.00E+00 | 0.08  | 8.85E-01 | 9.86E-01 |
| <b>HMG1P37</b>    | 0.38  | 8.83E-01 | 1.00E+00 | -0.13 | 8.85E-01 | 9.86E-01 |
| <b>PITHD1</b>     | 0.01  | 9.58E-01 | 1.00E+00 | 0.03  | 8.85E-01 | 9.86E-01 |
| <b>IFT88</b>      | 0.22  | 4.38E-01 | 1.00E+00 | -0.04 | 8.85E-01 | 9.86E-01 |
| <b>CCDC190</b>    | -1.96 | 5.64E-01 | 1.00E+00 | -0.26 | 8.85E-01 | 9.86E-01 |
| <b>ANKRD12</b>    | 0.05  | 8.63E-01 | 1.00E+00 | -0.05 | 8.85E-01 | 9.86E-01 |
| <b>SLC41A1</b>    | 0.03  | 9.09E-01 | 1.00E+00 | 0.06  | 8.85E-01 | 9.86E-01 |
| <b>C17orf49</b>   | 0.48  | 6.33E-01 | 1.00E+00 | -0.09 | 8.85E-01 | 9.86E-01 |
| <b>NPLOC4</b>     | 0.13  | 5.52E-01 | 1.00E+00 | 0.07  | 8.85E-01 | 9.86E-01 |
| <b>GGNBP2</b>     | 0.01  | 9.52E-01 | 1.00E+00 | -0.02 | 8.86E-01 | 9.86E-01 |
| <b>AL031777.3</b> | -2.69 | 7.23E-02 | 1.00E+00 | 0.18  | 8.86E-01 | 9.86E-01 |
| <b>TMEM129</b>    | 0.14  | 5.94E-01 | 1.00E+00 | -0.08 | 8.86E-01 | 9.86E-01 |

|                    |       |          |          |       |          |          |
|--------------------|-------|----------|----------|-------|----------|----------|
| <b>SREBF2-AS1</b>  | 0.26  | 6.13E-01 | 1.00E+00 | 0.05  | 8.86E-01 | 9.86E-01 |
| <b>EIF3K</b>       | -0.20 | 3.85E-01 | 1.00E+00 | -0.02 | 8.86E-01 | 9.86E-01 |
| <b>EBLN3P</b>      | 0.25  | 3.02E-01 | 1.00E+00 | 0.04  | 8.86E-01 | 9.86E-01 |
| <b>RTF1</b>        | -0.03 | 8.66E-01 | 1.00E+00 | 0.04  | 8.86E-01 | 9.86E-01 |
| <b>VAX2</b>        | -0.21 | 7.75E-01 | 1.00E+00 | -0.13 | 8.86E-01 | 9.86E-01 |
| <b>HPD</b>         | 0.19  | 8.69E-01 | 1.00E+00 | -0.13 | 8.86E-01 | 9.86E-01 |
| <b>XLOC_007528</b> | -0.41 | 8.51E-01 | 1.00E+00 | 0.16  | 8.86E-01 | 9.86E-01 |
| <b>KLHL38</b>      | -0.28 | 7.37E-01 | 1.00E+00 | -0.17 | 8.86E-01 | 9.86E-01 |
| <b>AC099494.1</b>  | 1.23  | 7.18E-01 | 1.00E+00 | -0.20 | 8.86E-01 | 9.86E-01 |
| <b>ANO4</b>        | -0.54 | 5.71E-01 | 1.00E+00 | -0.14 | 8.86E-01 | 9.86E-01 |
| <b>SLC16A8</b>     | 0.43  | 4.67E-01 | 1.00E+00 | -0.09 | 8.86E-01 | 9.86E-01 |
| <b>BTF3P10</b>     | 0.62  | 8.57E-01 | 1.00E+00 | 0.10  | 8.86E-01 | 9.86E-01 |
| <b>XLOC_012997</b> | 0.58  | 3.27E-01 | 1.00E+00 | 0.10  | 8.86E-01 | 9.86E-01 |
| <b>CES4A</b>       | 0.08  | 9.02E-01 | 1.00E+00 | -0.07 | 8.86E-01 | 9.86E-01 |
| <b>CRY1</b>        | 0.70  | 8.12E-03 | 5.56E-01 | 0.04  | 8.86E-01 | 9.86E-01 |
| <b>AC023512.1</b>  | 1.11  | 7.45E-01 | 1.00E+00 | 0.13  | 8.86E-01 | 9.86E-01 |
| <b>METTL22</b>     | 0.30  | 3.12E-01 | 1.00E+00 | 0.04  | 8.86E-01 | 9.86E-01 |
| <b>DAP</b>         | -0.22 | 3.32E-01 | 1.00E+00 | -0.03 | 8.86E-01 | 9.86E-01 |
| <b>SEMA6C</b>      | 0.13  | 6.65E-01 | 1.00E+00 | 0.12  | 8.86E-01 | 9.86E-01 |
| <b>G30917</b>      | -1.29 | 3.52E-01 | 1.00E+00 | 0.15  | 8.86E-01 | 9.86E-01 |
| <b>ESR1</b>        | 0.49  | 4.58E-01 | 1.00E+00 | 0.07  | 8.87E-01 | 9.86E-01 |
| <b>ANXA11</b>      | 0.12  | 5.86E-01 | 1.00E+00 | -0.06 | 8.87E-01 | 9.86E-01 |
| <b>RNF24</b>       | 0.08  | 8.18E-01 | 1.00E+00 | -0.03 | 8.87E-01 | 9.86E-01 |
| <b>AL162311.3</b>  | -0.25 | 7.72E-01 | 1.00E+00 | -0.12 | 8.87E-01 | 9.86E-01 |
| <b>IL17RC</b>      | -0.10 | 7.08E-01 | 1.00E+00 | -0.08 | 8.87E-01 | 9.86E-01 |
| <b>NAA35</b>       | 0.15  | 4.56E-01 | 1.00E+00 | 0.03  | 8.87E-01 | 9.86E-01 |
| <b>AC087392.5</b>  | -0.08 | 9.24E-01 | 1.00E+00 | 0.13  | 8.87E-01 | 9.86E-01 |
| <b>PARK7</b>       | 0.14  | 5.91E-01 | 1.00E+00 | 0.03  | 8.87E-01 | 9.86E-01 |
| <b>PTP4A3</b>      | -0.64 | 1.19E-02 | 6.77E-01 | 0.06  | 8.87E-01 | 9.86E-01 |
| <b>AC025754.2</b>  | -4.25 | 7.38E-02 | 1.00E+00 | 0.14  | 8.87E-01 | 9.86E-01 |
| <b>GTF2E1</b>      | -0.06 | 8.28E-01 | 1.00E+00 | -0.03 | 8.87E-01 | 9.86E-01 |
| <b>SND1</b>        | -0.14 | 4.42E-01 | 1.00E+00 | 0.04  | 8.87E-01 | 9.86E-01 |

|                   |       |          |          |       |          |          |
|-------------------|-------|----------|----------|-------|----------|----------|
| <b>AC087392.1</b> | -1.10 | 2.10E-01 | 1.00E+00 | -0.09 | 8.87E-01 | 9.86E-01 |
| <b>FBXO46</b>     | -0.08 | 7.55E-01 | 1.00E+00 | -0.08 | 8.87E-01 | 9.86E-01 |
| <b>AC135803.1</b> | 1.04  | 7.57E-01 | 1.00E+00 | 0.23  | 8.87E-01 | 9.86E-01 |
| <b>FMO6P</b>      | 0.88  | 7.23E-01 | 1.00E+00 | -0.16 | 8.87E-01 | 9.86E-01 |
| <b>KMT2C</b>      | -0.26 | 2.48E-01 | 1.00E+00 | -0.04 | 8.87E-01 | 9.86E-01 |
| <b>MPP2</b>       | -0.06 | 9.01E-01 | 1.00E+00 | 0.11  | 8.87E-01 | 9.86E-01 |
| <b>AP000851.2</b> | -1.13 | 6.56E-01 | 1.00E+00 | 0.18  | 8.87E-01 | 9.86E-01 |
| <b>AC142381.3</b> | -0.28 | 6.73E-01 | 1.00E+00 | -0.18 | 8.87E-01 | 9.86E-01 |
| <b>FAM185BP</b>   | -0.22 | 7.17E-01 | 1.00E+00 | 0.08  | 8.87E-01 | 9.86E-01 |
| <b>AL162274.3</b> | -0.12 | 9.03E-01 | 1.00E+00 | 0.19  | 8.87E-01 | 9.86E-01 |
| <b>CNTRL</b>      | -0.03 | 9.13E-01 | 1.00E+00 | -0.05 | 8.88E-01 | 9.86E-01 |
| <b>AL139393.1</b> | -0.66 | 7.13E-01 | 1.00E+00 | 0.24  | 8.88E-01 | 9.86E-01 |
| <b>IP6K3</b>      | -0.18 | 9.02E-01 | 1.00E+00 | -0.21 | 8.88E-01 | 9.86E-01 |
| <b>SHANK3</b>     | -0.55 | 1.03E-01 | 1.00E+00 | 0.44  | 8.88E-01 | 9.86E-01 |
| <b>SAMD5</b>      | -0.18 | 7.40E-01 | 1.00E+00 | -0.10 | 8.88E-01 | 9.86E-01 |
| <b>AC079848.1</b> | 0.30  | 5.79E-01 | 1.00E+00 | 0.16  | 8.88E-01 | 9.86E-01 |
| <b>GRHL2</b>      | -0.29 | 3.46E-01 | 1.00E+00 | -0.08 | 8.88E-01 | 9.86E-01 |
| <b>G23688</b>     | -0.57 | 6.94E-01 | 1.00E+00 | -0.45 | 8.88E-01 | 9.86E-01 |
| <b>AC078883.1</b> | -3.22 | 2.41E-02 | 9.18E-01 | -0.07 | 8.88E-01 | 9.86E-01 |
| <b>RPS3A</b>      | -0.05 | 8.92E-01 | 1.00E+00 | 0.06  | 8.88E-01 | 9.86E-01 |
| <b>KLHL2</b>      | 0.38  | 3.62E-01 | 1.00E+00 | -0.08 | 8.88E-01 | 9.86E-01 |
| <b>G11276</b>     | -0.27 | 9.08E-01 | 1.00E+00 | -0.17 | 8.88E-01 | 9.86E-01 |
| <b>BBIP1</b>      | 0.04  | 8.78E-01 | 1.00E+00 | 0.03  | 8.88E-01 | 9.86E-01 |
| <b>CSRNP2</b>     | -0.19 | 4.63E-01 | 1.00E+00 | 0.07  | 8.88E-01 | 9.86E-01 |
| <b>ISY1</b>       | 0.03  | 8.76E-01 | 1.00E+00 | 0.02  | 8.88E-01 | 9.86E-01 |
| <b>AC023632.2</b> | -0.85 | 1.68E-01 | 1.00E+00 | 0.09  | 8.88E-01 | 9.86E-01 |
| <b>RPLP1</b>      | -0.21 | 5.17E-01 | 1.00E+00 | -0.04 | 8.88E-01 | 9.86E-01 |
| <b>AC008555.1</b> | 0.47  | 5.29E-01 | 1.00E+00 | 0.19  | 8.88E-01 | 9.86E-01 |
| <b>ARHGEF16</b>   | -0.52 | 4.64E-02 | 1.00E+00 | -0.09 | 8.88E-01 | 9.86E-01 |
| <b>AC026704.1</b> | 0.33  | 8.96E-01 | 1.00E+00 | -0.14 | 8.88E-01 | 9.86E-01 |
| <b>KRTAP1-5</b>   | -2.82 | 2.12E-03 | 2.39E-01 | -0.44 | 8.88E-01 | 9.86E-01 |
| <b>G11342</b>     | -3.57 | 6.68E-02 | 1.00E+00 | -0.11 | 8.88E-01 | 9.86E-01 |

|                    |       |          |          |       |          |          |
|--------------------|-------|----------|----------|-------|----------|----------|
| <b>PUS7L</b>       | -0.03 | 9.16E-01 | 1.00E+00 | 0.04  | 8.88E-01 | 9.86E-01 |
| <b>EIF3M</b>       | -0.07 | 7.40E-01 | 1.00E+00 | -0.03 | 8.88E-01 | 9.86E-01 |
| <b>XLOC_012999</b> | 2.14  | 1.88E-01 | 1.00E+00 | 0.45  | 8.89E-01 | 9.86E-01 |
| <b>PSMB2</b>       | -0.17 | 4.08E-01 | 1.00E+00 | -0.02 | 8.89E-01 | 9.86E-01 |
| <b>AL354707.1</b>  | 0.18  | 7.92E-01 | 1.00E+00 | -0.11 | 8.89E-01 | 9.86E-01 |
| <b>AC020910.5</b>  | -0.41 | 7.10E-01 | 1.00E+00 | -0.09 | 8.89E-01 | 9.86E-01 |
| <b>LINC01814</b>   | -1.14 | 5.55E-01 | 1.00E+00 | 0.14  | 8.89E-01 | 9.86E-01 |
| <b>NDN</b>         | 0.49  | 2.64E-01 | 1.00E+00 | 0.10  | 8.89E-01 | 9.86E-01 |
| <b>ATAD5</b>       | -0.23 | 5.12E-01 | 1.00E+00 | 0.06  | 8.89E-01 | 9.86E-01 |
| <b>ENOSF1</b>      | 0.49  | 2.21E-01 | 1.00E+00 | 0.04  | 8.89E-01 | 9.86E-01 |
| <b>PLP2</b>        | -0.07 | 8.37E-01 | 1.00E+00 | -0.05 | 8.89E-01 | 9.86E-01 |
| <b>S100A11</b>     | -0.11 | 6.86E-01 | 1.00E+00 | -0.03 | 8.89E-01 | 9.86E-01 |
| <b>PARD3B</b>      | 0.16  | 6.70E-01 | 1.00E+00 | 0.05  | 8.89E-01 | 9.86E-01 |
| <b>PASK</b>        | -0.15 | 5.84E-01 | 1.00E+00 | 0.08  | 8.89E-01 | 9.86E-01 |
| <b>C15orf41</b>    | -0.22 | 3.57E-01 | 1.00E+00 | 0.05  | 8.89E-01 | 9.86E-01 |
| <b>ASPA</b>        | 0.32  | 4.60E-01 | 1.00E+00 | 0.06  | 8.89E-01 | 9.86E-01 |
| <b>XLOC_011152</b> | -0.23 | 7.90E-01 | 1.00E+00 | 0.14  | 8.89E-01 | 9.86E-01 |
| <b>NCOA5</b>       | -0.13 | 5.94E-01 | 1.00E+00 | 0.05  | 8.89E-01 | 9.86E-01 |
| <b>KRTAP10-2</b>   | -2.67 | 8.58E-03 | 5.70E-01 | -0.44 | 8.89E-01 | 9.86E-01 |
| <b>SMIM35</b>      | 1.55  | 4.91E-01 | 1.00E+00 | -0.23 | 8.89E-01 | 9.86E-01 |
| <b>FGFR1OP</b>     | 0.28  | 5.68E-01 | 1.00E+00 | 0.05  | 8.89E-01 | 9.86E-01 |
| <b>AC098859.1</b>  | NA    | NA       | NA       | 0.13  | 8.89E-01 | 9.86E-01 |
| <b>SOCS2</b>       | 0.14  | 6.38E-01 | 1.00E+00 | 0.07  | 8.90E-01 | 9.86E-01 |
| <b>FAM102B</b>     | 0.06  | 8.64E-01 | 1.00E+00 | 0.06  | 8.90E-01 | 9.86E-01 |
| <b>AL450063.1</b>  | 0.90  | 7.96E-01 | 1.00E+00 | -0.11 | 8.90E-01 | 9.86E-01 |
| <b>CCDC120</b>     | -0.55 | 2.25E-01 | 1.00E+00 | 0.08  | 8.90E-01 | 9.86E-01 |
| <b>AC134043.2</b>  | 0.76  | 2.67E-01 | 1.00E+00 | -0.09 | 8.90E-01 | 9.86E-01 |
| <b>CTSF</b>        | 0.53  | 1.15E-01 | 1.00E+00 | -0.07 | 8.90E-01 | 9.86E-01 |
| <b>AC137936.1</b>  | -4.04 | 1.02E-01 | 1.00E+00 | 0.44  | 8.90E-01 | 9.86E-01 |
| <b>LYVE1</b>       | 0.20  | 7.39E-01 | 1.00E+00 | -0.08 | 8.90E-01 | 9.86E-01 |
| <b>DNAJC2</b>      | 0.02  | 9.20E-01 | 1.00E+00 | -0.03 | 8.90E-01 | 9.86E-01 |
| <b>CASC19</b>      | 1.67  | 2.36E-02 | 9.15E-01 | 0.09  | 8.90E-01 | 9.86E-01 |



|                     |       |          |          |       |          |          |
|---------------------|-------|----------|----------|-------|----------|----------|
| <b>MIER1</b>        | 0.05  | 8.36E-01 | 1.00E+00 | -0.03 | 8.90E-01 | 9.86E-01 |
| <b>SYCP2</b>        | -0.29 | 5.96E-01 | 1.00E+00 | 0.08  | 8.90E-01 | 9.86E-01 |
| <b>PTPRZ1</b>       | -0.38 | 3.07E-01 | 1.00E+00 | -0.08 | 8.90E-01 | 9.86E-01 |
| <b>JAKMIP2</b>      | -0.48 | 3.53E-01 | 1.00E+00 | 0.10  | 8.90E-01 | 9.86E-01 |
| <b>ERLIN1</b>       | 0.12  | 6.06E-01 | 1.00E+00 | -0.02 | 8.91E-01 | 9.86E-01 |
| <b>TTC7B</b>        | 0.38  | 3.51E-01 | 1.00E+00 | 0.09  | 8.91E-01 | 9.86E-01 |
| <b>VPS13C</b>       | -0.09 | 6.59E-01 | 1.00E+00 | 0.04  | 8.91E-01 | 9.86E-01 |
| <b>CAP1P2</b>       | NA    | NA       | NA       | -0.08 | 8.91E-01 | 9.86E-01 |
| <b>KRI1</b>         | -0.31 | 3.30E-01 | 1.00E+00 | -0.05 | 8.91E-01 | 9.86E-01 |
| <b>CAMKV</b>        | -3.84 | 1.16E-03 | 1.79E-01 | -0.43 | 8.91E-01 | 9.86E-01 |
| <b>LCE1B</b>        | 0.56  | 4.18E-01 | 1.00E+00 | -0.12 | 8.91E-01 | 9.86E-01 |
| <b>DHH</b>          | 0.76  | 2.75E-01 | 1.00E+00 | -0.12 | 8.91E-01 | 9.86E-01 |
| <b>TRAPPC13</b>     | 0.17  | 5.63E-01 | 1.00E+00 | 0.03  | 8.91E-01 | 9.86E-01 |
| <b>AC105345.2</b>   | NA    | NA       | NA       | -0.18 | 8.91E-01 | 9.86E-01 |
| <b>AL441988.1</b>   | 0.11  | 9.60E-01 | 1.00E+00 | -0.13 | 8.91E-01 | 9.86E-01 |
| <b>NKAIN3</b>       | 0.26  | 8.39E-01 | 1.00E+00 | -0.12 | 8.91E-01 | 9.86E-01 |
| <b>ZNF286B</b>      | 0.27  | 4.07E-01 | 1.00E+00 | -0.05 | 8.91E-01 | 9.86E-01 |
| <b>LINC02344</b>    | -0.58 | 8.68E-01 | 1.00E+00 | -0.27 | 8.91E-01 | 9.86E-01 |
| <b>FAM72B</b>       | 0.32  | 4.50E-01 | 1.00E+00 | 0.06  | 8.91E-01 | 9.86E-01 |
| <b>NTN4</b>         | 0.58  | 2.82E-01 | 1.00E+00 | 0.08  | 8.91E-01 | 9.86E-01 |
| <b>LCMT1</b>        | -0.05 | 8.46E-01 | 1.00E+00 | -0.03 | 8.91E-01 | 9.86E-01 |
| <b>ATP6V0E2-AS1</b> | 0.44  | 6.58E-01 | 1.00E+00 | -0.15 | 8.91E-01 | 9.86E-01 |
| <b>SNX17</b>        | 0.11  | 6.10E-01 | 1.00E+00 | -0.02 | 8.91E-01 | 9.86E-01 |
| <b>CLMN</b>         | 0.79  | 1.30E-01 | 1.00E+00 | -0.08 | 8.91E-01 | 9.86E-01 |
| <b>PPP1R3D</b>      | -0.22 | 3.81E-01 | 1.00E+00 | -0.08 | 8.91E-01 | 9.86E-01 |
| <b>RGMB</b>         | -0.08 | 8.10E-01 | 1.00E+00 | -0.05 | 8.91E-01 | 9.86E-01 |
| <b>DHX34</b>        | -0.46 | 1.39E-01 | 1.00E+00 | 0.08  | 8.91E-01 | 9.86E-01 |
| <b>NOC3L</b>        | 0.21  | 6.21E-01 | 1.00E+00 | 0.04  | 8.92E-01 | 9.86E-01 |
| <b>C17orf107</b>    | 0.00  | 9.97E-01 | 1.00E+00 | 0.08  | 8.92E-01 | 9.86E-01 |
| <b>HLA-DQA1</b>     | 0.05  | 9.49E-01 | 1.00E+00 | -0.08 | 8.92E-01 | 9.86E-01 |
| <b>TCF23</b>        | -0.36 | 7.87E-01 | 1.00E+00 | 0.18  | 8.92E-01 | 9.86E-01 |
| <b>GPC5-AS2</b>     | -2.97 | 2.62E-01 | 1.00E+00 | -0.43 | 8.92E-01 | 9.86E-01 |

|                   |       |          |          |       |          |          |
|-------------------|-------|----------|----------|-------|----------|----------|
| <b>SHTN1</b>      | -0.31 | 2.57E-01 | 1.00E+00 | 0.04  | 8.92E-01 | 9.86E-01 |
| <b>MFAP3L</b>     | -0.07 | 7.93E-01 | 1.00E+00 | -0.05 | 8.92E-01 | 9.86E-01 |
| <b>RPL23AP18</b>  | -1.60 | 6.12E-01 | 1.00E+00 | 0.16  | 8.92E-01 | 9.86E-01 |
| <b>TAS1R3</b>     | 0.49  | 5.69E-01 | 1.00E+00 | 0.16  | 8.92E-01 | 9.86E-01 |
| <b>C6orf47</b>    | 0.05  | 8.02E-01 | 1.00E+00 | 0.04  | 8.92E-01 | 9.86E-01 |
| <b>GALNT12</b>    | 0.21  | 6.85E-01 | 1.00E+00 | -0.08 | 8.92E-01 | 9.86E-01 |
| <b>NDUFAF1</b>    | 0.23  | 1.98E-01 | 1.00E+00 | 0.04  | 8.92E-01 | 9.86E-01 |
| <b>RPL3P2</b>     | -0.07 | 9.42E-01 | 1.00E+00 | 0.12  | 8.92E-01 | 9.86E-01 |
| <b>PRKAB1</b>     | 0.01  | 9.82E-01 | 1.00E+00 | 0.05  | 8.92E-01 | 9.86E-01 |
| <b>RASA2</b>      | 0.18  | 5.89E-01 | 1.00E+00 | 0.04  | 8.92E-01 | 9.86E-01 |
| <b>LINC00937</b>  | 0.57  | 6.76E-01 | 1.00E+00 | 0.10  | 8.92E-01 | 9.86E-01 |
| <b>AC130469.1</b> | 0.54  | 8.72E-01 | 1.00E+00 | 0.10  | 8.92E-01 | 9.86E-01 |
| <b>AL138899.1</b> | -1.07 | 6.07E-01 | 1.00E+00 | -0.16 | 8.92E-01 | 9.86E-01 |
| <b>ZNF235</b>     | 0.52  | 2.17E-01 | 1.00E+00 | 0.06  | 8.92E-01 | 9.86E-01 |
| <b>AGO1</b>       | 0.10  | 6.65E-01 | 1.00E+00 | -0.03 | 8.92E-01 | 9.86E-01 |
| <b>FAM110A</b>    | 0.00  | 9.92E-01 | 1.00E+00 | 0.08  | 8.92E-01 | 9.86E-01 |
| <b>BEX2</b>       | -0.17 | 6.01E-01 | 1.00E+00 | -0.06 | 8.92E-01 | 9.86E-01 |
| <b>PRDM15</b>     | -0.42 | 1.48E-01 | 1.00E+00 | 0.06  | 8.92E-01 | 9.86E-01 |
| <b>AC006305.1</b> | -1.01 | 5.41E-01 | 1.00E+00 | 0.16  | 8.92E-01 | 9.86E-01 |
| <b>REXO4</b>      | 0.13  | 5.60E-01 | 1.00E+00 | 0.06  | 8.92E-01 | 9.86E-01 |
| <b>SPTBN4</b>     | -0.66 | 2.52E-01 | 1.00E+00 | -0.13 | 8.92E-01 | 9.86E-01 |
| <b>NKX3-1</b>     | -0.87 | 1.42E-01 | 1.00E+00 | -0.07 | 8.92E-01 | 9.86E-01 |
| <b>RDM1</b>       | -1.70 | 2.38E-01 | 1.00E+00 | -0.13 | 8.92E-01 | 9.86E-01 |
| <b>PHKG2</b>      | -0.31 | 1.39E-01 | 1.00E+00 | -0.02 | 8.92E-01 | 9.86E-01 |
| <b>KRT8P33</b>    | -0.96 | 2.53E-01 | 1.00E+00 | 0.12  | 8.93E-01 | 9.86E-01 |
| <b>AC007114.1</b> | -0.17 | 6.22E-01 | 1.00E+00 | -0.05 | 8.93E-01 | 9.86E-01 |
| <b>WDR24</b>      | 0.05  | 8.66E-01 | 1.00E+00 | -0.06 | 8.93E-01 | 9.86E-01 |
| <b>CAPS2</b>      | 0.01  | 9.84E-01 | 1.00E+00 | 0.05  | 8.93E-01 | 9.86E-01 |
| <b>CITED4</b>     | -0.42 | 2.91E-01 | 1.00E+00 | -0.12 | 8.93E-01 | 9.86E-01 |
| <b>DDX55</b>      | -0.13 | 5.98E-01 | 1.00E+00 | -0.04 | 8.93E-01 | 9.86E-01 |
| <b>LINC02315</b>  | -1.19 | 4.03E-01 | 1.00E+00 | -0.32 | 8.93E-01 | 9.86E-01 |
| <b>RPS26P11</b>   | 0.59  | 7.22E-01 | 1.00E+00 | 0.11  | 8.93E-01 | 9.86E-01 |

|                    |       |          |          |       |          |          |
|--------------------|-------|----------|----------|-------|----------|----------|
| <b>GOLGA8M</b>     | -0.02 | 9.94E-01 | 1.00E+00 | 0.16  | 8.93E-01 | 9.86E-01 |
| <b>AP002449.1</b>  | 0.03  | 9.91E-01 | 1.00E+00 | -0.13 | 8.93E-01 | 9.86E-01 |
| <b>XLOC_002840</b> | -2.93 | 2.86E-01 | 1.00E+00 | -0.12 | 8.93E-01 | 9.86E-01 |
| <b>XLOC_004680</b> | -1.08 | 6.27E-01 | 1.00E+00 | -0.17 | 8.93E-01 | 9.86E-01 |
| <b>10-Mar</b>      | -2.15 | 3.57E-01 | 1.00E+00 | 0.19  | 8.93E-01 | 9.86E-01 |
| <b>FRAT1</b>       | -0.16 | 5.69E-01 | 1.00E+00 | 0.10  | 8.93E-01 | 9.86E-01 |
| <b>XLOC_013955</b> | -0.55 | 8.60E-01 | 1.00E+00 | 0.20  | 8.93E-01 | 9.86E-01 |
| <b>UGT8</b>        | -0.68 | 2.77E-01 | 1.00E+00 | 0.10  | 8.93E-01 | 9.86E-01 |
| <b>CTC1</b>        | 0.21  | 4.58E-01 | 1.00E+00 | -0.05 | 8.93E-01 | 9.86E-01 |
| <b>MYO7B</b>       | 0.71  | 2.43E-01 | 1.00E+00 | -0.06 | 8.93E-01 | 9.86E-01 |
| <b>LRRC41</b>      | -0.01 | 9.60E-01 | 1.00E+00 | 0.03  | 8.94E-01 | 9.86E-01 |
| <b>ANKRD54</b>     | 0.20  | 4.17E-01 | 1.00E+00 | -0.04 | 8.94E-01 | 9.86E-01 |
| <b>BNIP3</b>       | 0.31  | 1.72E-01 | 1.00E+00 | 0.05  | 8.94E-01 | 9.86E-01 |
| <b>XLOC_002606</b> | 2.81  | 3.73E-01 | 1.00E+00 | 0.16  | 8.94E-01 | 9.86E-01 |
| <b>AC008758.6</b>  | -1.10 | 5.97E-01 | 1.00E+00 | 0.14  | 8.94E-01 | 9.86E-01 |
| <b>AMBN</b>        | -6.46 | 6.36E-02 | 1.00E+00 | 0.37  | 8.94E-01 | 9.86E-01 |
| <b>AL023583.1</b>  | -2.70 | 3.54E-02 | 1.00E+00 | -0.10 | 8.94E-01 | 9.86E-01 |
| <b>RHBG</b>        | -0.24 | 6.56E-01 | 1.00E+00 | -0.10 | 8.94E-01 | 9.86E-01 |
| <b>DMRT2</b>       | 1.09  | 3.63E-02 | 1.00E+00 | -0.12 | 8.94E-01 | 9.86E-01 |
| <b>NELFA</b>       | -0.15 | 5.88E-01 | 1.00E+00 | -0.04 | 8.94E-01 | 9.86E-01 |
| <b>VN1R1</b>       | 0.29  | 7.70E-01 | 1.00E+00 | -0.12 | 8.94E-01 | 9.86E-01 |
| <b>EMID1</b>       | -0.15 | 8.01E-01 | 1.00E+00 | 0.40  | 8.94E-01 | 9.86E-01 |
| <b>GSTA1</b>       | -0.48 | 6.29E-01 | 1.00E+00 | 0.11  | 8.94E-01 | 9.86E-01 |
| <b>TMEM136</b>     | 0.58  | 2.92E-01 | 1.00E+00 | 0.07  | 8.94E-01 | 9.86E-01 |
| <b>AL365205.1</b>  | -0.65 | 7.08E-01 | 1.00E+00 | 0.09  | 8.94E-01 | 9.86E-01 |
| <b>RAD54L2</b>     | 0.13  | 5.89E-01 | 1.00E+00 | 0.02  | 8.94E-01 | 9.86E-01 |
| <b>RPL6P27</b>     | -0.33 | 3.96E-01 | 1.00E+00 | -0.06 | 8.94E-01 | 9.86E-01 |
| <b>MYL6P5</b>      | NA    | NA       | NA       | 0.10  | 8.94E-01 | 9.86E-01 |
| <b>RAB19</b>       | -2.32 | 1.25E-01 | 1.00E+00 | 0.16  | 8.94E-01 | 9.86E-01 |
| <b>ATG9A</b>       | -0.22 | 3.52E-01 | 1.00E+00 | -0.06 | 8.94E-01 | 9.86E-01 |
| <b>DNMBP</b>       | -0.04 | 9.05E-01 | 1.00E+00 | -0.05 | 8.94E-01 | 9.86E-01 |
| <b>AL590556.1</b>  | 0.56  | 8.71E-01 | 1.00E+00 | 0.42  | 8.94E-01 | 9.86E-01 |

|                   |       |          |          |       |          |          |
|-------------------|-------|----------|----------|-------|----------|----------|
| <b>PROSER3</b>    | -0.68 | 6.57E-02 | 1.00E+00 | -0.05 | 8.94E-01 | 9.86E-01 |
| <b>MINDY2</b>     | 0.32  | 2.64E-01 | 1.00E+00 | 0.03  | 8.94E-01 | 9.86E-01 |
| <b>ADGRE3</b>     | 4.00  | 2.33E-01 | 1.00E+00 | 0.30  | 8.94E-01 | 9.86E-01 |
| <b>SEC14L5</b>    | 0.28  | 6.34E-01 | 1.00E+00 | 0.09  | 8.94E-01 | 9.86E-01 |
| <b>G27376</b>     | -1.98 | 5.62E-01 | 1.00E+00 | -0.22 | 8.94E-01 | 9.86E-01 |
| <b>PHLDA1</b>     | 0.14  | 7.32E-01 | 1.00E+00 | 0.04  | 8.94E-01 | 9.86E-01 |
| <b>AOC2</b>       | 1.41  | 1.10E-01 | 1.00E+00 | 0.32  | 8.94E-01 | 9.86E-01 |
| <b>CHRN2</b>      | -1.51 | 7.76E-02 | 1.00E+00 | 0.16  | 8.94E-01 | 9.86E-01 |
| <b>MTBP</b>       | -0.59 | 7.03E-02 | 1.00E+00 | 0.07  | 8.94E-01 | 9.86E-01 |
| <b>OTOF</b>       | -0.21 | 7.76E-01 | 1.00E+00 | 0.38  | 8.94E-01 | 9.86E-01 |
| <b>GRM2</b>       | -1.38 | 3.08E-02 | 1.00E+00 | -0.22 | 8.95E-01 | 9.86E-01 |
| <b>AC009509.1</b> | -0.25 | 8.98E-01 | 1.00E+00 | 0.42  | 8.95E-01 | 9.86E-01 |
| <b>STAU1</b>      | -0.11 | 4.93E-01 | 1.00E+00 | 0.03  | 8.95E-01 | 9.86E-01 |
| <b>HMGCR</b>      | -0.27 | 5.36E-01 | 1.00E+00 | 0.05  | 8.95E-01 | 9.86E-01 |
| <b>MMGT1</b>      | 0.27  | 1.51E-01 | 1.00E+00 | 0.03  | 8.95E-01 | 9.86E-01 |
| <b>G30504</b>     | -0.91 | 3.64E-01 | 1.00E+00 | -0.11 | 8.95E-01 | 9.86E-01 |
| <b>BCO1</b>       | -1.35 | 5.99E-02 | 1.00E+00 | 0.08  | 8.95E-01 | 9.86E-01 |
| <b>CTSZ</b>       | 0.13  | 7.03E-01 | 1.00E+00 | 0.41  | 8.95E-01 | 9.86E-01 |
| <b>TMEM86B</b>    | -1.09 | 2.17E-01 | 1.00E+00 | -0.10 | 8.95E-01 | 9.86E-01 |
| <b>G42645</b>     | 0.62  | 3.46E-01 | 1.00E+00 | 0.17  | 8.95E-01 | 9.86E-01 |
| <b>SCN3B</b>      | -0.60 | 2.26E-01 | 1.00E+00 | 0.04  | 8.95E-01 | 9.86E-01 |
| <b>AC055713.1</b> | -0.01 | 9.89E-01 | 1.00E+00 | 0.07  | 8.95E-01 | 9.86E-01 |
| <b>PREX2</b>      | 0.46  | 2.70E-01 | 1.00E+00 | -0.08 | 8.95E-01 | 9.86E-01 |
| <b>RADIL</b>      | 0.36  | 3.63E-01 | 1.00E+00 | -0.09 | 8.95E-01 | 9.86E-01 |
| <b>MIR3682</b>    | 1.63  | 3.56E-01 | 1.00E+00 | -0.09 | 8.95E-01 | 9.86E-01 |
| <b>B3GNTL1</b>    | -0.05 | 9.31E-01 | 1.00E+00 | 0.03  | 8.95E-01 | 9.86E-01 |
| <b>AL031599.1</b> | 0.87  | 1.89E-01 | 1.00E+00 | -0.14 | 8.95E-01 | 9.86E-01 |
| <b>CYP1A1</b>     | 1.80  | 1.87E-01 | 1.00E+00 | 0.41  | 8.95E-01 | 9.86E-01 |
| <b>CDH24</b>      | -0.35 | 4.17E-01 | 1.00E+00 | 0.14  | 8.95E-01 | 9.86E-01 |
| <b>ABRAXAS2</b>   | 0.07  | 6.83E-01 | 1.00E+00 | -0.03 | 8.95E-01 | 9.86E-01 |
| <b>RCC2</b>       | -0.04 | 8.92E-01 | 1.00E+00 | 0.06  | 8.95E-01 | 9.86E-01 |
| <b>AL157392.2</b> | -0.62 | 7.72E-01 | 1.00E+00 | 0.21  | 8.95E-01 | 9.86E-01 |

|                   |       |          |          |       |          |          |
|-------------------|-------|----------|----------|-------|----------|----------|
| <b>AC124283.2</b> | -0.95 | 3.69E-01 | 1.00E+00 | 0.13  | 8.95E-01 | 9.86E-01 |
| <b>AL451064.1</b> | -1.19 | 7.32E-01 | 1.00E+00 | -0.20 | 8.95E-01 | 9.86E-01 |
| <b>CLTB</b>       | 0.25  | 4.39E-01 | 1.00E+00 | -0.06 | 8.95E-01 | 9.86E-01 |
| <b>AC004987.2</b> | -0.78 | 2.92E-01 | 1.00E+00 | 0.04  | 8.95E-01 | 9.86E-01 |
| <b>AC129502.1</b> | 2.76  | 3.10E-01 | 1.00E+00 | -0.13 | 8.95E-01 | 9.86E-01 |
| <b>RPS27AP12</b>  | -1.28 | 7.07E-01 | 1.00E+00 | 0.14  | 8.95E-01 | 9.86E-01 |
| <b>TRABD2B</b>    | -0.02 | 9.68E-01 | 1.00E+00 | -0.33 | 8.95E-01 | 9.86E-01 |
| <b>AC009948.2</b> | -1.14 | 7.38E-01 | 1.00E+00 | -0.08 | 8.95E-01 | 9.86E-01 |
| <b>AL021368.2</b> | 0.31  | 5.01E-01 | 1.00E+00 | 0.07  | 8.95E-01 | 9.86E-01 |
| <b>ZNF699</b>     | 0.04  | 9.45E-01 | 1.00E+00 | 0.08  | 8.95E-01 | 9.86E-01 |
| <b>HRK</b>        | -1.04 | 3.49E-01 | 1.00E+00 | 0.12  | 8.95E-01 | 9.86E-01 |
| <b>AC091271.1</b> | 0.56  | 1.97E-01 | 1.00E+00 | -0.06 | 8.96E-01 | 9.86E-01 |
| <b>PPP1R3G</b>    | 0.22  | 5.51E-01 | 1.00E+00 | -0.08 | 8.96E-01 | 9.86E-01 |
| <b>COL9A2</b>     | -0.30 | 6.09E-01 | 1.00E+00 | -0.39 | 8.96E-01 | 9.86E-01 |
| <b>KHDC1</b>      | -2.34 | 9.92E-02 | 1.00E+00 | -0.09 | 8.96E-01 | 9.86E-01 |
| <b>SLC26A6</b>    | -0.24 | 4.04E-01 | 1.00E+00 | -0.06 | 8.96E-01 | 9.86E-01 |
| <b>RDX</b>        | 0.10  | 7.03E-01 | 1.00E+00 | -0.03 | 8.96E-01 | 9.86E-01 |
| <b>COL4A6</b>     | -0.47 | 6.84E-02 | 1.00E+00 | -0.06 | 8.96E-01 | 9.86E-01 |
| <b>AL049767.1</b> | -0.10 | 9.41E-01 | 1.00E+00 | -0.10 | 8.96E-01 | 9.86E-01 |
| <b>AC087521.3</b> | -0.40 | 7.30E-01 | 1.00E+00 | 0.12  | 8.96E-01 | 9.86E-01 |
| <b>AC023818.1</b> | -1.19 | 4.61E-01 | 1.00E+00 | 0.09  | 8.96E-01 | 9.86E-01 |
| <b>PPP1R3F</b>    | -0.33 | 2.77E-01 | 1.00E+00 | -0.08 | 8.96E-01 | 9.86E-01 |
| <b>NRAP</b>       | -0.96 | 4.07E-01 | 1.00E+00 | -0.18 | 8.96E-01 | 9.86E-01 |
| <b>STC1</b>       | -0.28 | 5.52E-01 | 1.00E+00 | 0.06  | 8.96E-01 | 9.86E-01 |
| <b>PKN2</b>       | 0.17  | 5.23E-01 | 1.00E+00 | -0.02 | 8.96E-01 | 9.86E-01 |
| <b>AL139022.1</b> | -1.09 | 4.04E-01 | 1.00E+00 | -0.12 | 8.96E-01 | 9.86E-01 |
| <b>AC062029.1</b> | 0.15  | 7.94E-01 | 1.00E+00 | -0.07 | 8.96E-01 | 9.86E-01 |
| <b>PDP2</b>       | 0.34  | 2.22E-01 | 1.00E+00 | 0.05  | 8.96E-01 | 9.86E-01 |
| <b>HS1BP3</b>     | 0.01  | 9.53E-01 | 1.00E+00 | 0.06  | 8.96E-01 | 9.86E-01 |
| <b>PPP1R3E</b>    | -0.25 | 2.55E-01 | 1.00E+00 | -0.06 | 8.96E-01 | 9.86E-01 |
| <b>AL671883.2</b> | -1.95 | 5.67E-01 | 1.00E+00 | 0.12  | 8.96E-01 | 9.86E-01 |
| <b>HMGB1P8</b>    | 0.56  | 8.71E-01 | 1.00E+00 | -0.08 | 8.96E-01 | 9.86E-01 |

|                    |       |          |          |       |          |          |
|--------------------|-------|----------|----------|-------|----------|----------|
| <b>GAPDHP63</b>    | NA    | NA       | NA       | -0.11 | 8.96E-01 | 9.86E-01 |
| <b>GLYCTK</b>      | 0.04  | 9.53E-01 | 1.00E+00 | 0.08  | 8.96E-01 | 9.86E-01 |
| <b>SRSF4</b>       | 0.13  | 2.88E-01 | 1.00E+00 | 0.03  | 8.96E-01 | 9.86E-01 |
| <b>SMPD2</b>       | -0.15 | 7.12E-01 | 1.00E+00 | -0.04 | 8.96E-01 | 9.86E-01 |
| <b>CXXC5</b>       | -0.10 | 5.48E-01 | 1.00E+00 | -0.06 | 8.96E-01 | 9.86E-01 |
| <b>LINC01239</b>   | 0.57  | 8.58E-01 | 1.00E+00 | -0.15 | 8.96E-01 | 9.86E-01 |
| <b>ARHGEF4</b>     | -0.60 | 1.07E-01 | 1.00E+00 | 0.07  | 8.96E-01 | 9.86E-01 |
| <b>COPA</b>        | 0.09  | 5.25E-01 | 1.00E+00 | 0.03  | 8.96E-01 | 9.86E-01 |
| <b>AL390066.1</b>  | 0.78  | 5.80E-01 | 1.00E+00 | -0.21 | 8.96E-01 | 9.86E-01 |
| <b>AC008438.1</b>  | -0.56 | 2.03E-01 | 1.00E+00 | -0.05 | 8.96E-01 | 9.86E-01 |
| <b>RPL12P4</b>     | -0.35 | 3.62E-01 | 1.00E+00 | 0.04  | 8.96E-01 | 9.86E-01 |
| <b>NSUN7</b>       | -0.06 | 9.05E-01 | 1.00E+00 | 0.07  | 8.97E-01 | 9.86E-01 |
| <b>AC097059.1</b>  | -3.40 | 2.22E-02 | 8.97E-01 | 0.10  | 8.97E-01 | 9.86E-01 |
| <b>XLOC_009819</b> | 0.08  | 9.63E-01 | 1.00E+00 | -0.39 | 8.97E-01 | 9.86E-01 |
| <b>ZBTB3</b>       | -0.13 | 7.33E-01 | 1.00E+00 | 0.05  | 8.97E-01 | 9.86E-01 |
| <b>RPL22P1</b>     | 0.04  | 9.24E-01 | 1.00E+00 | 0.06  | 8.97E-01 | 9.86E-01 |
| <b>TIPIN</b>       | -0.08 | 8.07E-01 | 1.00E+00 | 0.04  | 8.97E-01 | 9.86E-01 |
| <b>ADH1A</b>       | 1.51  | 6.62E-01 | 1.00E+00 | 0.11  | 8.97E-01 | 9.86E-01 |
| <b>KCNA5</b>       | -0.99 | 1.87E-01 | 1.00E+00 | -0.39 | 8.97E-01 | 9.86E-01 |
| <b>MAST3</b>       | -0.31 | 2.13E-01 | 1.00E+00 | -0.04 | 8.97E-01 | 9.86E-01 |
| <b>HOXA-AS2</b>    | -1.20 | 4.40E-02 | 1.00E+00 | 0.09  | 8.97E-01 | 9.86E-01 |
| <b>HSP90B1</b>     | 0.00  | 9.80E-01 | 1.00E+00 | 0.03  | 8.97E-01 | 9.86E-01 |
| <b>BMS1P15</b>     | 0.16  | 9.03E-01 | 1.00E+00 | -0.09 | 8.97E-01 | 9.86E-01 |
| <b>CCDC192</b>     | -0.42 | 6.64E-01 | 1.00E+00 | -0.09 | 8.97E-01 | 9.86E-01 |
| <b>AL109983.1</b>  | NA    | NA       | NA       | 0.17  | 8.97E-01 | 9.86E-01 |
| <b>AL035413.1</b>  | -1.52 | 1.73E-01 | 1.00E+00 | 0.08  | 8.97E-01 | 9.86E-01 |
| <b>CEP170P1</b>    | 0.68  | 4.94E-01 | 1.00E+00 | -0.07 | 8.97E-01 | 9.86E-01 |
| <b>ACADS</b>       | 0.44  | 3.61E-01 | 1.00E+00 | -0.07 | 8.97E-01 | 9.86E-01 |
| <b>ARHGAP8</b>     | 0.89  | 3.60E-01 | 1.00E+00 | 0.11  | 8.97E-01 | 9.86E-01 |
| <b>AC139495.1</b>  | -0.23 | 8.69E-01 | 1.00E+00 | 0.13  | 8.97E-01 | 9.86E-01 |
| <b>LINC01023</b>   | -0.15 | 9.66E-01 | 1.00E+00 | -0.10 | 8.97E-01 | 9.86E-01 |
| <b>TBX1</b>        | -0.65 | 1.32E-01 | 1.00E+00 | -0.29 | 8.97E-01 | 9.86E-01 |

|                    |       |          |          |       |          |          |
|--------------------|-------|----------|----------|-------|----------|----------|
| <b>ALDH1B1</b>     | -0.35 | 5.16E-01 | 1.00E+00 | 0.06  | 8.97E-01 | 9.86E-01 |
| <b>SCN11A</b>      | 0.02  | 9.74E-01 | 1.00E+00 | 0.29  | 8.97E-01 | 9.86E-01 |
| <b>PLSCR4</b>      | 0.49  | 1.66E-01 | 1.00E+00 | -0.05 | 8.97E-01 | 9.86E-01 |
| <b>PET117</b>      | 1.40  | 4.33E-01 | 1.00E+00 | 0.11  | 8.98E-01 | 9.86E-01 |
| <b>RPL7P9</b>      | -0.03 | 9.47E-01 | 1.00E+00 | 0.09  | 8.98E-01 | 9.86E-01 |
| <b>AC107027.3</b>  | 0.40  | 1.54E-01 | 1.00E+00 | -0.07 | 8.98E-01 | 9.86E-01 |
| <b>LINC00114</b>   | NA    | NA       | NA       | -0.37 | 8.98E-01 | 9.86E-01 |
| <b>HSPA8P4</b>     | 1.31  | 6.98E-01 | 1.00E+00 | 0.13  | 8.98E-01 | 9.86E-01 |
| <b>GATAD1</b>      | 0.32  | 1.79E-01 | 1.00E+00 | -0.05 | 8.98E-01 | 9.86E-01 |
| <b>ANKS6</b>       | 0.40  | 2.55E-01 | 1.00E+00 | 0.07  | 8.98E-01 | 9.86E-01 |
| <b>AC113174.1</b>  | -1.22 | 5.82E-01 | 1.00E+00 | 0.08  | 8.98E-01 | 9.86E-01 |
| <b>AL139100.1</b>  | -0.90 | 6.29E-01 | 1.00E+00 | 0.40  | 8.98E-01 | 9.86E-01 |
| <b>CDH13</b>       | -0.29 | 3.47E-01 | 1.00E+00 | 0.04  | 8.98E-01 | 9.86E-01 |
| <b>TLDC2</b>       | 1.06  | 4.37E-01 | 1.00E+00 | 0.12  | 8.98E-01 | 9.86E-01 |
| <b>GLB1L3</b>      | 0.25  | 2.74E-01 | 1.00E+00 | -0.06 | 8.98E-01 | 9.86E-01 |
| <b>AC009061.1</b>  | 0.04  | 9.61E-01 | 1.00E+00 | -0.14 | 8.98E-01 | 9.86E-01 |
| <b>IBA57</b>       | 0.06  | 8.32E-01 | 1.00E+00 | 0.04  | 8.98E-01 | 9.86E-01 |
| <b>XLOC_003111</b> | 0.83  | 2.51E-01 | 1.00E+00 | -0.08 | 8.98E-01 | 9.86E-01 |
| <b>SLC49A3</b>     | 0.10  | 7.83E-01 | 1.00E+00 | 0.12  | 8.98E-01 | 9.86E-01 |
| <b>KRTAP5-1</b>    | -2.88 | 5.71E-02 | 1.00E+00 | -0.41 | 8.98E-01 | 9.86E-01 |
| <b>ZNF702P</b>     | 0.43  | 5.78E-01 | 1.00E+00 | -0.07 | 8.98E-01 | 9.86E-01 |
| <b>ZNF725P</b>     | 1.29  | 6.59E-01 | 1.00E+00 | 0.41  | 8.98E-01 | 9.86E-01 |
| <b>AC009318.2</b>  | -0.65 | 5.95E-01 | 1.00E+00 | 0.10  | 8.98E-01 | 9.86E-01 |
| <b>GNAQ</b>        | -0.01 | 9.84E-01 | 1.00E+00 | 0.05  | 8.98E-01 | 9.86E-01 |
| <b>GRIK1</b>       | -0.15 | 8.11E-01 | 1.00E+00 | 0.09  | 8.99E-01 | 9.86E-01 |
| <b>C2orf74</b>     | 0.92  | 7.17E-01 | 1.00E+00 | -0.10 | 8.99E-01 | 9.86E-01 |
| <b>AC012313.5</b>  | 0.48  | 3.71E-01 | 1.00E+00 | -0.11 | 8.99E-01 | 9.86E-01 |
| <b>PFKFB3</b>      | 0.55  | 3.33E-01 | 1.00E+00 | -0.06 | 8.99E-01 | 9.86E-01 |
| <b>GYS1</b>        | 0.02  | 9.20E-01 | 1.00E+00 | -0.06 | 8.99E-01 | 9.86E-01 |
| <b>RNF17</b>       | -3.61 | 2.29E-01 | 1.00E+00 | 0.20  | 8.99E-01 | 9.86E-01 |
| <b>SLC9C1</b>      | 1.00  | 2.86E-01 | 1.00E+00 | -0.10 | 8.99E-01 | 9.86E-01 |
| <b>GEMIN2</b>      | 0.46  | 1.45E-01 | 1.00E+00 | -0.04 | 8.99E-01 | 9.86E-01 |

|             |       |          |          |       |          |          |
|-------------|-------|----------|----------|-------|----------|----------|
| KDM8        | -0.35 | 2.98E-01 | 1.00E+00 | 0.07  | 8.99E-01 | 9.86E-01 |
| TP63        | -0.12 | 7.42E-01 | 1.00E+00 | -0.07 | 8.99E-01 | 9.86E-01 |
| ZC3H15      | 0.09  | 6.67E-01 | 1.00E+00 | -0.02 | 8.99E-01 | 9.86E-01 |
| ABCG5       | 0.57  | 7.42E-01 | 1.00E+00 | 0.14  | 8.99E-01 | 9.86E-01 |
| PSMB3       | -0.29 | 1.37E-01 | 1.00E+00 | -0.03 | 8.99E-01 | 9.86E-01 |
| POT1        | 0.33  | 2.04E-01 | 1.00E+00 | -0.03 | 8.99E-01 | 9.86E-01 |
| B4GALNT4    | -0.81 | 1.27E-01 | 1.00E+00 | -0.40 | 8.99E-01 | 9.86E-01 |
| AC092053.2  | -0.39 | 8.05E-01 | 1.00E+00 | -0.14 | 8.99E-01 | 9.86E-01 |
| AC080037.1  | -1.91 | 3.51E-01 | 1.00E+00 | -0.16 | 8.99E-01 | 9.86E-01 |
| LRRRC61     | 0.04  | 9.05E-01 | 1.00E+00 | 0.06  | 8.99E-01 | 9.86E-01 |
| KANSL2      | 0.09  | 6.50E-01 | 1.00E+00 | 0.03  | 8.99E-01 | 9.86E-01 |
| ZNF334      | 0.49  | 5.62E-01 | 1.00E+00 | 0.08  | 8.99E-01 | 9.86E-01 |
| AP5Z1       | 0.01  | 9.72E-01 | 1.00E+00 | -0.05 | 8.99E-01 | 9.86E-01 |
| SEPT7P9     | -0.25 | 8.66E-01 | 1.00E+00 | -0.09 | 8.99E-01 | 9.86E-01 |
| PLPP6       | -0.33 | 3.13E-01 | 1.00E+00 | -0.03 | 8.99E-01 | 9.86E-01 |
| PDLIM5      | 0.13  | 5.21E-01 | 1.00E+00 | 0.02  | 9.00E-01 | 9.86E-01 |
| OSBPL2      | 0.15  | 5.95E-01 | 1.00E+00 | 0.02  | 9.00E-01 | 9.86E-01 |
| RNF181      | 0.10  | 5.73E-01 | 1.00E+00 | 0.04  | 9.00E-01 | 9.86E-01 |
| AL513123.1  | -1.55 | 6.55E-01 | 1.00E+00 | 0.24  | 9.00E-01 | 9.86E-01 |
| RAPGEF3     | 0.08  | 8.60E-01 | 1.00E+00 | 0.07  | 9.00E-01 | 9.86E-01 |
| AC092634.3  | 2.63  | 1.13E-01 | 1.00E+00 | -0.13 | 9.00E-01 | 9.86E-01 |
| AL358472.1  | NA    | NA       | NA       | 0.40  | 9.00E-01 | 9.86E-01 |
| AC135178.3  | 0.55  | 3.89E-01 | 1.00E+00 | 0.08  | 9.00E-01 | 9.86E-01 |
| GART        | 0.03  | 8.95E-01 | 1.00E+00 | 0.03  | 9.00E-01 | 9.86E-01 |
| PPIAP2      | -2.48 | 4.68E-01 | 1.00E+00 | 0.19  | 9.00E-01 | 9.86E-01 |
| OTC         | -0.23 | 9.31E-01 | 1.00E+00 | 0.23  | 9.00E-01 | 9.86E-01 |
| PSMD2       | 0.04  | 8.53E-01 | 1.00E+00 | 0.03  | 9.00E-01 | 9.86E-01 |
| AC110749.1  | -1.60 | 5.52E-01 | 1.00E+00 | -0.08 | 9.00E-01 | 9.86E-01 |
| SLC10A3     | -0.17 | 5.70E-01 | 1.00E+00 | -0.03 | 9.00E-01 | 9.86E-01 |
| XLOC_006476 | 0.28  | 8.14E-01 | 1.00E+00 | 0.14  | 9.00E-01 | 9.86E-01 |
| STAC        | -0.12 | 8.43E-01 | 1.00E+00 | 0.07  | 9.00E-01 | 9.86E-01 |
| TRAP1       | -0.15 | 4.50E-01 | 1.00E+00 | -0.03 | 9.00E-01 | 9.86E-01 |



|                    |       |          |          |       |          |          |
|--------------------|-------|----------|----------|-------|----------|----------|
| <b>MAX</b>         | 0.20  | 2.29E-01 | 1.00E+00 | 0.04  | 9.00E-01 | 9.86E-01 |
| <b>ZPR1</b>        | 0.04  | 7.99E-01 | 1.00E+00 | -0.04 | 9.01E-01 | 9.86E-01 |
| <b>PICK1</b>       | 0.00  | 9.84E-01 | 1.00E+00 | -0.10 | 9.01E-01 | 9.86E-01 |
| <b>XLOC_014263</b> | -1.78 | 3.83E-01 | 1.00E+00 | 0.18  | 9.01E-01 | 9.86E-01 |
| <b>DDAH1</b>       | 0.25  | 5.08E-01 | 1.00E+00 | -0.04 | 9.01E-01 | 9.86E-01 |
| <b>AC025419.1</b>  | 0.85  | 7.58E-01 | 1.00E+00 | -0.14 | 9.01E-01 | 9.86E-01 |
| <b>DCLRE1C</b>     | 0.23  | 4.82E-01 | 1.00E+00 | 0.04  | 9.01E-01 | 9.87E-01 |
| <b>TAF5</b>        | -0.15 | 7.27E-01 | 1.00E+00 | -0.06 | 9.01E-01 | 9.87E-01 |
| <b>CU639417.3</b>  | -0.54 | 4.67E-01 | 1.00E+00 | -0.08 | 9.01E-01 | 9.87E-01 |
| <b>DENND1B</b>     | -0.13 | 6.81E-01 | 1.00E+00 | -0.05 | 9.01E-01 | 9.87E-01 |
| <b>WARS</b>        | -0.32 | 3.71E-01 | 1.00E+00 | 0.07  | 9.01E-01 | 9.87E-01 |
| <b>AC008155.1</b>  | -1.95 | 5.70E-01 | 1.00E+00 | 0.11  | 9.01E-01 | 9.87E-01 |
| <b>CDK1</b>        | 0.34  | 4.50E-01 | 1.00E+00 | 0.04  | 9.01E-01 | 9.87E-01 |
| <b>MMP28</b>       | 0.27  | 4.90E-01 | 1.00E+00 | 0.04  | 9.01E-01 | 9.87E-01 |
| <b>DPM3</b>        | 0.23  | 2.53E-01 | 1.00E+00 | -0.02 | 9.01E-01 | 9.87E-01 |
| <b>LAD1</b>        | -0.26 | 5.73E-01 | 1.00E+00 | 0.08  | 9.01E-01 | 9.87E-01 |
| <b>AC016757.1</b>  | 0.79  | 3.62E-01 | 1.00E+00 | 0.13  | 9.01E-01 | 9.87E-01 |
| <b>SH3RF2</b>      | 0.06  | 8.77E-01 | 1.00E+00 | -0.06 | 9.01E-01 | 9.87E-01 |
| <b>IL17RE</b>      | -0.07 | 8.44E-01 | 1.00E+00 | 0.07  | 9.01E-01 | 9.87E-01 |
| <b>AC097375.3</b>  | 1.31  | 3.17E-01 | 1.00E+00 | -0.39 | 9.02E-01 | 9.87E-01 |
| <b>HIPK4</b>       | 0.15  | 8.01E-01 | 1.00E+00 | 0.17  | 9.02E-01 | 9.87E-01 |
| <b>TNKS2</b>       | 0.15  | 5.09E-01 | 1.00E+00 | 0.06  | 9.02E-01 | 9.87E-01 |
| <b>SRCAP</b>       | -0.32 | 4.40E-01 | 1.00E+00 | 0.07  | 9.02E-01 | 9.87E-01 |
| <b>TP73-AS1</b>    | -0.15 | 6.14E-01 | 1.00E+00 | 0.07  | 9.02E-01 | 9.87E-01 |
| <b>CLTRN</b>       | -0.44 | 6.24E-01 | 1.00E+00 | -0.08 | 9.02E-01 | 9.87E-01 |
| <b>CFAP61</b>      | 0.13  | 8.72E-01 | 1.00E+00 | -0.08 | 9.02E-01 | 9.87E-01 |
| <b>STAG1</b>       | -0.19 | 3.92E-01 | 1.00E+00 | -0.03 | 9.02E-01 | 9.87E-01 |
| <b>ZNF311</b>      | 0.12  | 7.65E-01 | 1.00E+00 | 0.09  | 9.02E-01 | 9.87E-01 |
| <b>MARVELD2</b>    | 0.09  | 7.23E-01 | 1.00E+00 | -0.05 | 9.02E-01 | 9.87E-01 |
| <b>FAM183A</b>     | -0.24 | 7.05E-01 | 1.00E+00 | -0.08 | 9.02E-01 | 9.87E-01 |
| <b>EPN3</b>        | -0.19 | 6.62E-01 | 1.00E+00 | -0.10 | 9.02E-01 | 9.87E-01 |
| <b>C1orf198</b>    | -0.02 | 9.37E-01 | 1.00E+00 | 0.03  | 9.02E-01 | 9.87E-01 |

|             |       |          |          |       |          |          |
|-------------|-------|----------|----------|-------|----------|----------|
| RAB3D       | 0.02  | 9.50E-01 | 1.00E+00 | 0.04  | 9.02E-01 | 9.87E-01 |
| NSG1        | 0.10  | 8.07E-01 | 1.00E+00 | 0.07  | 9.02E-01 | 9.87E-01 |
| LGR6        | -0.48 | 2.58E-01 | 1.00E+00 | 0.07  | 9.02E-01 | 9.87E-01 |
| AL137145.2  | -0.09 | 9.75E-01 | 1.00E+00 | 0.13  | 9.02E-01 | 9.87E-01 |
| AC012174.1  | 1.27  | 7.13E-01 | 1.00E+00 | -0.21 | 9.02E-01 | 9.87E-01 |
| ABCB5       | 0.54  | 6.22E-01 | 1.00E+00 | 0.14  | 9.02E-01 | 9.87E-01 |
| TUBA1B      | -0.10 | 6.63E-01 | 1.00E+00 | 0.04  | 9.02E-01 | 9.87E-01 |
| RPSAP6      | NA    | NA       | NA       | 0.23  | 9.02E-01 | 9.87E-01 |
| NCOA3       | -0.02 | 9.41E-01 | 1.00E+00 | 0.03  | 9.03E-01 | 9.87E-01 |
| AL031708.1  | 0.84  | 6.17E-01 | 1.00E+00 | -0.14 | 9.03E-01 | 9.87E-01 |
| ATG4A       | 0.21  | 3.07E-01 | 1.00E+00 | 0.03  | 9.03E-01 | 9.87E-01 |
| CETP        | 0.33  | 6.44E-01 | 1.00E+00 | 0.10  | 9.03E-01 | 9.87E-01 |
| ZNF497      | -0.60 | 2.56E-01 | 1.00E+00 | -0.11 | 9.03E-01 | 9.87E-01 |
| PCDHB6      | -0.37 | 3.51E-01 | 1.00E+00 | 0.08  | 9.03E-01 | 9.87E-01 |
| HSPB1       | -0.26 | 4.67E-01 | 1.00E+00 | -0.05 | 9.03E-01 | 9.87E-01 |
| FANCD2      | -0.29 | 4.28E-01 | 1.00E+00 | -0.05 | 9.03E-01 | 9.87E-01 |
| G41963      | -0.61 | 5.60E-01 | 1.00E+00 | 0.10  | 9.03E-01 | 9.87E-01 |
| AC090229.1  | 0.05  | 9.59E-01 | 1.00E+00 | 0.10  | 9.03E-01 | 9.87E-01 |
| HINFP       | -0.27 | 2.80E-01 | 1.00E+00 | 0.03  | 9.03E-01 | 9.87E-01 |
| AC008760.1  | -1.55 | 3.69E-01 | 1.00E+00 | 0.14  | 9.03E-01 | 9.87E-01 |
| AC131235.1  | -1.73 | 2.42E-01 | 1.00E+00 | -0.08 | 9.03E-01 | 9.87E-01 |
| SUPT16H     | -0.03 | 8.89E-01 | 1.00E+00 | -0.01 | 9.03E-01 | 9.87E-01 |
| LINC02601   | 1.21  | 6.28E-01 | 1.00E+00 | 0.12  | 9.03E-01 | 9.87E-01 |
| ACD         | -0.16 | 4.58E-01 | 1.00E+00 | 0.03  | 9.03E-01 | 9.87E-01 |
| ADH1B       | 1.54  | 5.15E-03 | 4.18E-01 | 0.09  | 9.03E-01 | 9.87E-01 |
| ASH1L       | -0.11 | 5.38E-01 | 1.00E+00 | 0.03  | 9.03E-01 | 9.87E-01 |
| AC005042.2  | 0.12  | 9.10E-01 | 1.00E+00 | 0.13  | 9.03E-01 | 9.87E-01 |
| G25761      | -2.68 | 2.63E-01 | 1.00E+00 | 0.18  | 9.03E-01 | 9.87E-01 |
| TENT5C      | -0.11 | 6.85E-01 | 1.00E+00 | -0.05 | 9.03E-01 | 9.87E-01 |
| SCUBE1      | 0.93  | 1.38E-01 | 1.00E+00 | -0.11 | 9.04E-01 | 9.87E-01 |
| MTUS1       | 0.19  | 5.75E-01 | 1.00E+00 | 0.03  | 9.04E-01 | 9.87E-01 |
| XLOC_002952 | -2.63 | 8.62E-02 | 1.00E+00 | -0.10 | 9.04E-01 | 9.87E-01 |

|                   |       |          |          |       |          |          |
|-------------------|-------|----------|----------|-------|----------|----------|
| <b>G26933</b>     | -1.07 | 3.56E-01 | 1.00E+00 | -0.09 | 9.04E-01 | 9.87E-01 |
| <b>FAM19A5</b>    | 0.61  | 9.82E-02 | 1.00E+00 | 0.09  | 9.04E-01 | 9.87E-01 |
| <b>TERB2</b>      | -0.15 | 9.67E-01 | 1.00E+00 | 0.25  | 9.04E-01 | 9.87E-01 |
| <b>RRM2P3</b>     | 0.34  | 7.50E-01 | 1.00E+00 | -0.13 | 9.04E-01 | 9.87E-01 |
| <b>AL139384.1</b> | -0.24 | 5.27E-01 | 1.00E+00 | -0.05 | 9.04E-01 | 9.87E-01 |
| <b>AC007790.1</b> | -1.17 | 7.37E-01 | 1.00E+00 | 0.33  | 9.04E-01 | 9.87E-01 |
| <b>AC027309.2</b> | -0.91 | 4.37E-01 | 1.00E+00 | -0.10 | 9.04E-01 | 9.87E-01 |
| <b>GPR156</b>     | -1.49 | 2.11E-02 | 8.94E-01 | 0.10  | 9.04E-01 | 9.87E-01 |
| <b>LINC02560</b>  | 0.27  | 5.39E-01 | 1.00E+00 | 0.07  | 9.04E-01 | 9.87E-01 |
| <b>ABHD4</b>      | 0.19  | 4.81E-01 | 1.00E+00 | 0.04  | 9.04E-01 | 9.87E-01 |
| <b>FLOT2</b>      | -0.01 | 9.80E-01 | 1.00E+00 | -0.05 | 9.04E-01 | 9.87E-01 |
| <b>TAF7L</b>      | -0.60 | 5.84E-01 | 1.00E+00 | 0.13  | 9.04E-01 | 9.87E-01 |
| <b>RPSAP69</b>    | 0.57  | 6.40E-01 | 1.00E+00 | -0.12 | 9.04E-01 | 9.87E-01 |
| <b>ZNF607</b>     | 0.83  | 3.21E-02 | 1.00E+00 | 0.06  | 9.04E-01 | 9.87E-01 |
| <b>AC040977.1</b> | -0.03 | 9.32E-01 | 1.00E+00 | -0.06 | 9.05E-01 | 9.87E-01 |
| <b>UBQLN4</b>     | -0.22 | 2.26E-01 | 1.00E+00 | 0.07  | 9.05E-01 | 9.87E-01 |
| <b>ZNF439</b>     | 0.15  | 7.19E-01 | 1.00E+00 | -0.03 | 9.05E-01 | 9.87E-01 |
| <b>FRK</b>        | 0.11  | 7.50E-01 | 1.00E+00 | 0.06  | 9.05E-01 | 9.87E-01 |
| <b>HSPD1P3</b>    | -1.10 | 7.53E-01 | 1.00E+00 | 0.39  | 9.05E-01 | 9.87E-01 |
| <b>GRIN3B</b>     | -2.26 | 1.01E-01 | 1.00E+00 | 0.38  | 9.05E-01 | 9.87E-01 |
| <b>AL023803.2</b> | 0.54  | 6.69E-01 | 1.00E+00 | -0.15 | 9.05E-01 | 9.87E-01 |
| <b>LINC00570</b>  | -2.99 | 8.04E-02 | 1.00E+00 | 0.38  | 9.05E-01 | 9.87E-01 |
| <b>AC004877.2</b> | -0.36 | 7.23E-01 | 1.00E+00 | -0.09 | 9.05E-01 | 9.87E-01 |
| <b>KCNB1</b>      | 1.12  | 1.50E-01 | 1.00E+00 | -0.10 | 9.05E-01 | 9.87E-01 |
| <b>PPP1CA</b>     | -0.28 | 2.40E-01 | 1.00E+00 | 0.03  | 9.05E-01 | 9.87E-01 |
| <b>RBFOX3</b>     | -2.29 | 1.03E-01 | 1.00E+00 | 0.16  | 9.05E-01 | 9.87E-01 |
| <b>PARG</b>       | -0.03 | 9.00E-01 | 1.00E+00 | -0.02 | 9.05E-01 | 9.87E-01 |
| <b>PYROXD2</b>    | 0.75  | 3.42E-01 | 1.00E+00 | 0.05  | 9.05E-01 | 9.87E-01 |
| <b>RAB29</b>      | 0.20  | 6.25E-01 | 1.00E+00 | 0.05  | 9.05E-01 | 9.87E-01 |
| <b>CACNA1G</b>    | 0.36  | 5.83E-01 | 1.00E+00 | 0.37  | 9.05E-01 | 9.87E-01 |
| <b>TMEM151A</b>   | -3.55 | 2.15E-03 | 2.39E-01 | -0.14 | 9.05E-01 | 9.87E-01 |
| <b>RSPO4</b>      | -0.54 | 5.66E-01 | 1.00E+00 | 0.37  | 9.05E-01 | 9.87E-01 |

|                   |       |          |          |       |          |          |
|-------------------|-------|----------|----------|-------|----------|----------|
| <b>PCDHA3</b>     | 1.20  | 2.18E-01 | 1.00E+00 | -0.36 | 9.05E-01 | 9.87E-01 |
| <b>TPM2</b>       | -0.61 | 2.94E-01 | 1.00E+00 | -0.05 | 9.05E-01 | 9.87E-01 |
| <b>NUDT16L1</b>   | -0.23 | 3.11E-01 | 1.00E+00 | -0.03 | 9.05E-01 | 9.87E-01 |
| <b>ARMH3</b>      | -0.05 | 7.90E-01 | 1.00E+00 | 0.03  | 9.05E-01 | 9.87E-01 |
| <b>C8orf88</b>    | -0.58 | 1.21E-01 | 1.00E+00 | -0.05 | 9.05E-01 | 9.87E-01 |
| <b>AL591379.1</b> | -0.87 | 8.00E-01 | 1.00E+00 | 0.17  | 9.05E-01 | 9.87E-01 |
| <b>AC002558.3</b> | -0.20 | 8.70E-01 | 1.00E+00 | 0.09  | 9.05E-01 | 9.87E-01 |
| <b>PMS2P7</b>     | -0.42 | 5.88E-01 | 1.00E+00 | -0.06 | 9.06E-01 | 9.87E-01 |
| <b>TRDC</b>       | 0.15  | 8.93E-01 | 1.00E+00 | -0.08 | 9.06E-01 | 9.87E-01 |
| <b>SH3GL3</b>     | -0.83 | 2.37E-01 | 1.00E+00 | -0.12 | 9.06E-01 | 9.87E-01 |
| <b>NIN</b>        | -0.25 | 3.69E-01 | 1.00E+00 | 0.05  | 9.06E-01 | 9.87E-01 |
| <b>AP003084.1</b> | 0.46  | 5.95E-01 | 1.00E+00 | -0.12 | 9.06E-01 | 9.87E-01 |
| <b>SPR</b>        | 0.08  | 8.31E-01 | 1.00E+00 | -0.04 | 9.06E-01 | 9.87E-01 |
| <b>METTL2B</b>    | -0.05 | 8.51E-01 | 1.00E+00 | 0.04  | 9.06E-01 | 9.87E-01 |
| <b>TRIM35</b>     | 0.15  | 7.35E-01 | 1.00E+00 | -0.04 | 9.06E-01 | 9.87E-01 |
| <b>SORT1</b>      | 0.16  | 5.40E-01 | 1.00E+00 | -0.03 | 9.06E-01 | 9.87E-01 |
| <b>PDXDC1</b>     | 0.22  | 3.75E-01 | 1.00E+00 | -0.03 | 9.06E-01 | 9.87E-01 |
| <b>CYB5R2</b>     | -0.02 | 9.31E-01 | 1.00E+00 | -0.04 | 9.06E-01 | 9.87E-01 |
| <b>ARHGAP27P2</b> | -2.17 | 8.96E-02 | 1.00E+00 | -0.15 | 9.06E-01 | 9.87E-01 |
| <b>PTPN5</b>      | -1.08 | 3.02E-01 | 1.00E+00 | -0.14 | 9.06E-01 | 9.87E-01 |
| <b>KRTAP9-7</b>   | -6.41 | 6.55E-02 | 1.00E+00 | 0.38  | 9.06E-01 | 9.87E-01 |
| <b>ZNF483</b>     | -0.05 | 9.42E-01 | 1.00E+00 | 0.08  | 9.06E-01 | 9.87E-01 |
| <b>LINC01229</b>  | 0.67  | 3.73E-01 | 1.00E+00 | -0.09 | 9.06E-01 | 9.87E-01 |
| <b>USP6NL</b>     | -0.15 | 5.97E-01 | 1.00E+00 | -0.04 | 9.06E-01 | 9.87E-01 |
| <b>TMPO-AS1</b>   | -0.13 | 8.24E-01 | 1.00E+00 | -0.09 | 9.06E-01 | 9.87E-01 |
| <b>LINC01527</b>  | 3.16  | 3.50E-01 | 1.00E+00 | 0.18  | 9.06E-01 | 9.87E-01 |
| <b>ACO2</b>       | -0.10 | 6.78E-01 | 1.00E+00 | -0.03 | 9.06E-01 | 9.87E-01 |
| <b>MT1M</b>       | 0.00  | 9.93E-01 | 1.00E+00 | 0.04  | 9.06E-01 | 9.87E-01 |
| <b>SIM1</b>       | 1.23  | 1.05E-02 | 6.33E-01 | -0.28 | 9.06E-01 | 9.87E-01 |
| <b>GALNT7</b>     | 0.53  | 4.66E-01 | 1.00E+00 | 0.05  | 9.06E-01 | 9.87E-01 |
| <b>CFTR</b>       | -0.28 | 6.61E-01 | 1.00E+00 | -0.08 | 9.06E-01 | 9.87E-01 |
| <b>ZCCHC7</b>     | 0.10  | 5.70E-01 | 1.00E+00 | -0.02 | 9.06E-01 | 9.87E-01 |

|                   |       |          |          |       |          |          |
|-------------------|-------|----------|----------|-------|----------|----------|
| <b>BMP4</b>       | 0.28  | 2.47E-01 | 1.00E+00 | 0.04  | 9.07E-01 | 9.87E-01 |
| <b>BX537318.2</b> | -1.03 | 5.22E-01 | 1.00E+00 | 0.27  | 9.07E-01 | 9.87E-01 |
| <b>AC098864.1</b> | 0.59  | 6.73E-01 | 1.00E+00 | 0.12  | 9.07E-01 | 9.87E-01 |
| <b>DDIT3</b>      | -0.10 | 8.15E-01 | 1.00E+00 | 0.03  | 9.07E-01 | 9.87E-01 |
| <b>TXNP4</b>      | -0.72 | 8.35E-01 | 1.00E+00 | -0.10 | 9.07E-01 | 9.87E-01 |
| <b>HCFC2</b>      | 0.22  | 5.60E-01 | 1.00E+00 | 0.03  | 9.07E-01 | 9.87E-01 |
| <b>KCNJ12</b>     | 0.07  | 9.04E-01 | 1.00E+00 | 0.06  | 9.07E-01 | 9.87E-01 |
| <b>AC092755.2</b> | 1.81  | 5.94E-01 | 1.00E+00 | -0.14 | 9.07E-01 | 9.87E-01 |
| <b>AC007038.2</b> | -2.35 | 3.26E-01 | 1.00E+00 | -0.11 | 9.07E-01 | 9.87E-01 |
| <b>IRF6</b>       | -0.09 | 7.69E-01 | 1.00E+00 | -0.05 | 9.07E-01 | 9.87E-01 |
| <b>PIMREG</b>     | 0.23  | 5.71E-01 | 1.00E+00 | 0.06  | 9.07E-01 | 9.87E-01 |
| <b>AL109618.1</b> | 0.93  | 5.85E-01 | 1.00E+00 | -0.06 | 9.07E-01 | 9.87E-01 |
| <b>JAM2</b>       | -0.07 | 8.71E-01 | 1.00E+00 | -0.06 | 9.07E-01 | 9.87E-01 |
| <b>MDP1</b>       | NA    | NA       | NA       | -0.13 | 9.07E-01 | 9.87E-01 |
| <b>SPOUT1</b>     | -0.01 | 9.74E-01 | 1.00E+00 | 0.02  | 9.07E-01 | 9.87E-01 |
| <b>RECK</b>       | 1.00  | 1.99E-02 | 8.80E-01 | 0.05  | 9.07E-01 | 9.87E-01 |
| <b>PARD6B</b>     | 0.44  | 2.29E-01 | 1.00E+00 | -0.06 | 9.07E-01 | 9.87E-01 |
| <b>HS6ST2</b>     | -0.01 | 9.89E-01 | 1.00E+00 | 0.13  | 9.07E-01 | 9.87E-01 |
| <b>MAMDC2-AS1</b> | 0.72  | 4.70E-01 | 1.00E+00 | -0.08 | 9.07E-01 | 9.87E-01 |
| <b>AC132812.1</b> | 0.06  | 9.41E-01 | 1.00E+00 | 0.09  | 9.07E-01 | 9.87E-01 |
| <b>CYP4X1</b>     | 0.14  | 8.18E-01 | 1.00E+00 | 0.06  | 9.07E-01 | 9.87E-01 |
| <b>G19270</b>     | 1.00  | 3.50E-01 | 1.00E+00 | -0.37 | 9.07E-01 | 9.87E-01 |
| <b>BTG3-AS1</b>   | 0.39  | 4.57E-01 | 1.00E+00 | 0.06  | 9.07E-01 | 9.87E-01 |
| <b>BCL11B</b>     | -0.34 | 4.08E-01 | 1.00E+00 | -0.06 | 9.07E-01 | 9.87E-01 |
| <b>KRT83</b>      | -2.94 | 3.78E-01 | 1.00E+00 | -0.37 | 9.07E-01 | 9.87E-01 |
| <b>DTD2</b>       | 0.20  | 4.02E-01 | 1.00E+00 | -0.04 | 9.07E-01 | 9.87E-01 |
| <b>C10orf113</b>  | 0.44  | 8.99E-01 | 1.00E+00 | -0.20 | 9.08E-01 | 9.87E-01 |
| <b>B3GALT6</b>    | -0.14 | 5.13E-01 | 1.00E+00 | 0.07  | 9.08E-01 | 9.87E-01 |
| <b>FNDC4</b>      | 0.41  | 5.19E-01 | 1.00E+00 | -0.08 | 9.08E-01 | 9.87E-01 |
| <b>POSTN</b>      | -0.33 | 2.30E-01 | 1.00E+00 | -0.05 | 9.08E-01 | 9.87E-01 |
| <b>SAP30L-AS1</b> | -0.73 | 4.41E-01 | 1.00E+00 | -0.05 | 9.08E-01 | 9.87E-01 |
| <b>UROD</b>       | 0.00  | 9.87E-01 | 1.00E+00 | -0.03 | 9.08E-01 | 9.87E-01 |

|            |       |          |          |       |          |          |
|------------|-------|----------|----------|-------|----------|----------|
| KCNE5      | -2.43 | 2.16E-01 | 1.00E+00 | 0.11  | 9.08E-01 | 9.87E-01 |
| G17127     | -0.10 | 9.03E-01 | 1.00E+00 | -0.04 | 9.08E-01 | 9.87E-01 |
| Z83826.1   | 0.74  | 4.51E-01 | 1.00E+00 | -0.10 | 9.08E-01 | 9.87E-01 |
| AL357507.1 | -2.49 | 4.24E-01 | 1.00E+00 | 0.12  | 9.08E-01 | 9.87E-01 |
| CDX4       | 0.95  | 1.87E-01 | 1.00E+00 | -0.12 | 9.08E-01 | 9.87E-01 |
| AP002414.2 | 0.11  | 9.21E-01 | 1.00E+00 | -0.16 | 9.08E-01 | 9.87E-01 |
| ADAM11     | -0.97 | 1.32E-01 | 1.00E+00 | 0.09  | 9.08E-01 | 9.87E-01 |
| ABCB8      | -0.23 | 3.18E-01 | 1.00E+00 | 0.04  | 9.08E-01 | 9.87E-01 |
| CMTR2      | 0.34  | 2.93E-01 | 1.00E+00 | 0.03  | 9.08E-01 | 9.87E-01 |
| HOXB7      | -0.03 | 9.47E-01 | 1.00E+00 | 0.04  | 9.08E-01 | 9.87E-01 |
| ZFP57      | -3.77 | 7.96E-04 | 1.40E-01 | 0.21  | 9.08E-01 | 9.87E-01 |
| PDZRN3     | -0.07 | 9.00E-01 | 1.00E+00 | 0.06  | 9.08E-01 | 9.87E-01 |
| NCR3LG1    | -0.05 | 9.33E-01 | 1.00E+00 | 0.07  | 9.08E-01 | 9.87E-01 |
| RTL8C      | -0.07 | 7.87E-01 | 1.00E+00 | -0.03 | 9.08E-01 | 9.87E-01 |
| AC073072.1 | 0.34  | 9.23E-01 | 1.00E+00 | -0.37 | 9.08E-01 | 9.87E-01 |
| AC055854.1 | -1.34 | 1.34E-01 | 1.00E+00 | 0.09  | 9.09E-01 | 9.87E-01 |
| RILP       | 0.02  | 9.55E-01 | 1.00E+00 | -0.08 | 9.09E-01 | 9.87E-01 |
| ESRP2      | -0.26 | 4.97E-01 | 1.00E+00 | -0.07 | 9.09E-01 | 9.87E-01 |
| EIF2A      | -0.21 | 4.09E-01 | 1.00E+00 | -0.03 | 9.09E-01 | 9.87E-01 |
| ZNF236     | -0.18 | 5.59E-01 | 1.00E+00 | 0.03  | 9.09E-01 | 9.87E-01 |
| RPUSD4     | 0.08  | 7.09E-01 | 1.00E+00 | -0.02 | 9.09E-01 | 9.87E-01 |
| BBOX1      | -0.18 | 6.35E-01 | 1.00E+00 | -0.07 | 9.09E-01 | 9.87E-01 |
| ZNF878     | -2.34 | 4.06E-01 | 1.00E+00 | 0.19  | 9.09E-01 | 9.87E-01 |
| CTAGE15    | -0.24 | 8.72E-01 | 1.00E+00 | 0.10  | 9.09E-01 | 9.87E-01 |
| ERC1       | -0.23 | 2.67E-01 | 1.00E+00 | -0.04 | 9.09E-01 | 9.87E-01 |
| AC019131.2 | -0.74 | 2.10E-01 | 1.00E+00 | -0.06 | 9.09E-01 | 9.87E-01 |
| AL355607.2 | -0.88 | 7.29E-01 | 1.00E+00 | 0.09  | 9.09E-01 | 9.87E-01 |
| AC010203.1 | 0.06  | 9.78E-01 | 1.00E+00 | 0.14  | 9.09E-01 | 9.87E-01 |
| ZNF81      | 0.01  | 9.57E-01 | 1.00E+00 | -0.04 | 9.09E-01 | 9.87E-01 |
| GLI1       | 0.14  | 8.05E-01 | 1.00E+00 | -0.10 | 9.09E-01 | 9.87E-01 |
| BNIP1      | -0.02 | 9.70E-01 | 1.00E+00 | 0.07  | 9.09E-01 | 9.87E-01 |
| SP2-AS1    | -0.36 | 3.95E-01 | 1.00E+00 | 0.05  | 9.09E-01 | 9.87E-01 |

|                   |       |          |          |       |          |          |
|-------------------|-------|----------|----------|-------|----------|----------|
| <b>CCDC30</b>     | 0.19  | 5.26E-01 | 1.00E+00 | -0.04 | 9.09E-01 | 9.87E-01 |
| <b>AC125257.1</b> | 0.62  | 8.74E-02 | 1.00E+00 | 0.05  | 9.09E-01 | 9.87E-01 |
| <b>TEX2</b>       | -0.09 | 5.95E-01 | 1.00E+00 | -0.03 | 9.09E-01 | 9.87E-01 |
| <b>RNF38</b>      | 0.13  | 5.16E-01 | 1.00E+00 | 0.03  | 9.09E-01 | 9.87E-01 |
| <b>RPL23AP53</b>  | -0.27 | 4.59E-01 | 1.00E+00 | 0.03  | 9.09E-01 | 9.87E-01 |
| <b>DESI2</b>      | 0.21  | 3.98E-01 | 1.00E+00 | 0.04  | 9.09E-01 | 9.87E-01 |
| <b>SARNP</b>      | 0.37  | 8.11E-01 | 1.00E+00 | -0.12 | 9.09E-01 | 9.87E-01 |
| <b>EGF</b>        | 0.36  | 5.56E-01 | 1.00E+00 | -0.10 | 9.09E-01 | 9.87E-01 |
| <b>PGAP2</b>      | -0.22 | 4.59E-01 | 1.00E+00 | -0.04 | 9.09E-01 | 9.87E-01 |
| <b>LFNG</b>       | -0.05 | 8.55E-01 | 1.00E+00 | 0.05  | 9.10E-01 | 9.87E-01 |
| <b>ANGPTL4</b>    | 0.80  | 1.93E-01 | 1.00E+00 | -0.06 | 9.10E-01 | 9.88E-01 |
| <b>SATB2</b>      | -0.04 | 8.97E-01 | 1.00E+00 | -0.05 | 9.10E-01 | 9.88E-01 |
| <b>G34301</b>     | 0.93  | 3.25E-01 | 1.00E+00 | -0.13 | 9.10E-01 | 9.88E-01 |
| <b>NAP1L4</b>     | 0.18  | 2.49E-01 | 1.00E+00 | -0.02 | 9.10E-01 | 9.88E-01 |
| <b>AC135352.1</b> | -2.14 | 2.21E-01 | 1.00E+00 | 0.13  | 9.10E-01 | 9.88E-01 |
| <b>AMOTL2</b>     | 0.05  | 8.12E-01 | 1.00E+00 | 0.05  | 9.10E-01 | 9.88E-01 |
| <b>GALNT9</b>     | -0.56 | 8.67E-01 | 1.00E+00 | 0.22  | 9.10E-01 | 9.88E-01 |
| <b>ZNF670</b>     | -0.17 | 7.10E-01 | 1.00E+00 | -0.05 | 9.10E-01 | 9.88E-01 |
| <b>UBE2L5</b>     | 0.31  | 6.46E-01 | 1.00E+00 | 0.07  | 9.10E-01 | 9.88E-01 |
| <b>OR2A1-AS1</b>  | 0.30  | 6.49E-01 | 1.00E+00 | -0.07 | 9.10E-01 | 9.88E-01 |
| <b>ZBED3</b>      | -0.14 | 7.43E-01 | 1.00E+00 | -0.07 | 9.10E-01 | 9.88E-01 |
| <b>AQP8</b>       | -0.90 | 4.65E-01 | 1.00E+00 | 0.17  | 9.10E-01 | 9.88E-01 |
| <b>MAPK13</b>     | -0.04 | 9.10E-01 | 1.00E+00 | 0.04  | 9.10E-01 | 9.88E-01 |
| <b>HPS3</b>       | -0.17 | 4.38E-01 | 1.00E+00 | -0.04 | 9.10E-01 | 9.88E-01 |
| <b>COA1</b>       | -0.06 | 7.64E-01 | 1.00E+00 | -0.02 | 9.10E-01 | 9.88E-01 |
| <b>AHSA2P</b>     | 0.68  | 2.19E-01 | 1.00E+00 | -0.07 | 9.11E-01 | 9.88E-01 |
| <b>CASTOR1</b>    | 0.53  | 7.98E-01 | 1.00E+00 | 0.08  | 9.11E-01 | 9.88E-01 |
| <b>GOLGA6L9</b>   | -0.65 | 3.32E-01 | 1.00E+00 | 0.09  | 9.11E-01 | 9.88E-01 |
| <b>SRY</b>        | 1.28  | 2.35E-01 | 1.00E+00 | -0.14 | 9.11E-01 | 9.88E-01 |
| <b>USP27X-AS1</b> | 0.65  | 1.01E-01 | 1.00E+00 | 0.07  | 9.11E-01 | 9.88E-01 |
| <b>HECTD2</b>     | -0.10 | 7.82E-01 | 1.00E+00 | -0.04 | 9.11E-01 | 9.88E-01 |
| <b>TMUB1</b>      | -0.07 | 7.25E-01 | 1.00E+00 | -0.08 | 9.11E-01 | 9.88E-01 |

|                   |       |          |          |       |          |          |
|-------------------|-------|----------|----------|-------|----------|----------|
| <b>AC103703.1</b> | -1.25 | 7.13E-01 | 1.00E+00 | -0.15 | 9.11E-01 | 9.88E-01 |
| <b>CLLU10S</b>    | -1.24 | 7.19E-01 | 1.00E+00 | 0.23  | 9.11E-01 | 9.88E-01 |
| <b>ST13P15</b>    | -0.27 | 8.96E-01 | 1.00E+00 | 0.06  | 9.11E-01 | 9.88E-01 |
| <b>SRGAP2C</b>    | -0.01 | 9.79E-01 | 1.00E+00 | -0.06 | 9.11E-01 | 9.88E-01 |
| <b>CYP2D6</b>     | -2.18 | 6.37E-02 | 1.00E+00 | -0.08 | 9.11E-01 | 9.88E-01 |
| <b>EXOC3-AS1</b>  | -0.24 | 3.62E-01 | 1.00E+00 | 0.05  | 9.11E-01 | 9.88E-01 |
| <b>CDR2</b>       | 0.18  | 2.95E-01 | 1.00E+00 | 0.05  | 9.11E-01 | 9.88E-01 |
| <b>TAF8</b>       | -0.01 | 9.73E-01 | 1.00E+00 | 0.02  | 9.11E-01 | 9.88E-01 |
| <b>AC004000.1</b> | -0.57 | 7.47E-01 | 1.00E+00 | 0.14  | 9.11E-01 | 9.88E-01 |
| <b>AL034417.4</b> | 1.39  | 3.19E-01 | 1.00E+00 | 0.11  | 9.11E-01 | 9.88E-01 |
| <b>NDUFA5P11</b>  | NA    | NA       | NA       | -0.12 | 9.11E-01 | 9.88E-01 |
| <b>SINHCAFP2</b>  | NA    | NA       | NA       | 0.09  | 9.12E-01 | 9.88E-01 |
| <b>WHAMMP2</b>    | 0.84  | 3.63E-01 | 1.00E+00 | 0.08  | 9.12E-01 | 9.88E-01 |
| <b>HYAL4</b>      | -1.36 | 6.12E-02 | 1.00E+00 | -0.28 | 9.12E-01 | 9.88E-01 |
| <b>LRFN2</b>      | 0.63  | 6.36E-01 | 1.00E+00 | -0.17 | 9.12E-01 | 9.88E-01 |
| <b>PRKCZ-AS1</b>  | -0.75 | 2.98E-01 | 1.00E+00 | 0.11  | 9.12E-01 | 9.88E-01 |
| <b>MGC16275</b>   | 0.13  | 8.39E-01 | 1.00E+00 | -0.12 | 9.12E-01 | 9.88E-01 |
| <b>FBXO5</b>      | -0.01 | 9.70E-01 | 1.00E+00 | 0.03  | 9.12E-01 | 9.88E-01 |
| <b>PKMP3</b>      | 0.62  | 6.15E-01 | 1.00E+00 | 0.12  | 9.12E-01 | 9.88E-01 |
| <b>ORC2</b>       | 0.03  | 9.19E-01 | 1.00E+00 | -0.03 | 9.12E-01 | 9.88E-01 |
| <b>PKMP1</b>      | NA    | NA       | NA       | 0.07  | 9.12E-01 | 9.88E-01 |
| <b>CD59</b>       | 0.42  | 2.93E-01 | 1.00E+00 | -0.03 | 9.12E-01 | 9.88E-01 |
| <b>SLC46A2</b>    | 0.12  | 8.65E-01 | 1.00E+00 | -0.07 | 9.12E-01 | 9.88E-01 |
| <b>RPS3AP47</b>   | 0.05  | 9.51E-01 | 1.00E+00 | -0.09 | 9.12E-01 | 9.88E-01 |
| <b>PGM5-AS1</b>   | 1.62  | 3.38E-02 | 1.00E+00 | -0.07 | 9.12E-01 | 9.88E-01 |
| <b>MRPL12</b>     | -0.40 | 4.45E-01 | 1.00E+00 | 0.05  | 9.12E-01 | 9.88E-01 |
| <b>ZNF189</b>     | 0.14  | 5.29E-01 | 1.00E+00 | 0.03  | 9.13E-01 | 9.88E-01 |
| <b>BHLHE41</b>    | -0.79 | 1.28E-01 | 1.00E+00 | -0.06 | 9.13E-01 | 9.88E-01 |
| <b>KLHL12</b>     | 0.37  | 6.82E-02 | 1.00E+00 | 0.02  | 9.13E-01 | 9.88E-01 |
| <b>LRIG3</b>      | -0.18 | 4.63E-01 | 1.00E+00 | -0.02 | 9.13E-01 | 9.88E-01 |
| <b>VAC14</b>      | -0.30 | 1.08E-01 | 1.00E+00 | 0.06  | 9.13E-01 | 9.88E-01 |
| <b>ITGB3</b>      | 0.31  | 5.06E-01 | 1.00E+00 | 0.09  | 9.13E-01 | 9.88E-01 |



|                    |       |          |          |       |          |          |
|--------------------|-------|----------|----------|-------|----------|----------|
| <b>AC078817.1</b>  | -1.79 | 5.88E-01 | 1.00E+00 | 0.34  | 9.13E-01 | 9.88E-01 |
| <b>NKIRAS2</b>     | -0.14 | 4.96E-01 | 1.00E+00 | -0.02 | 9.13E-01 | 9.88E-01 |
| <b>GATA1</b>       | 1.64  | 1.72E-01 | 1.00E+00 | 0.15  | 9.13E-01 | 9.88E-01 |
| <b>G8320</b>       | -3.78 | 5.10E-03 | 4.18E-01 | 0.11  | 9.13E-01 | 9.88E-01 |
| <b>AC025459.1</b>  | -1.76 | 6.09E-01 | 1.00E+00 | 0.09  | 9.13E-01 | 9.89E-01 |
| <b>DNAH9</b>       | -0.46 | 3.47E-01 | 1.00E+00 | 0.05  | 9.13E-01 | 9.89E-01 |
| <b>HGH1</b>        | 0.05  | 9.28E-01 | 1.00E+00 | -0.10 | 9.13E-01 | 9.89E-01 |
| <b>G24464</b>      | -0.30 | 6.94E-01 | 1.00E+00 | -0.10 | 9.13E-01 | 9.89E-01 |
| <b>OTOP3</b>       | -0.24 | 8.77E-01 | 1.00E+00 | 0.10  | 9.13E-01 | 9.89E-01 |
| <b>PHKA2</b>       | -0.24 | 3.72E-01 | 1.00E+00 | -0.05 | 9.13E-01 | 9.89E-01 |
| <b>FAXC</b>        | -0.33 | 6.37E-01 | 1.00E+00 | 0.08  | 9.13E-01 | 9.89E-01 |
| <b>VWA8-AS1</b>    | -2.43 | 2.62E-01 | 1.00E+00 | -0.14 | 9.13E-01 | 9.89E-01 |
| <b>CABLES2</b>     | -0.44 | 1.10E-01 | 1.00E+00 | -0.08 | 9.13E-01 | 9.89E-01 |
| <b>INSC</b>        | -0.14 | 8.02E-01 | 1.00E+00 | 0.16  | 9.13E-01 | 9.89E-01 |
| <b>PRELID3B</b>    | 0.04  | 8.74E-01 | 1.00E+00 | 0.04  | 9.14E-01 | 9.89E-01 |
| <b>G7052</b>       | 2.50  | 5.02E-02 | 1.00E+00 | -0.10 | 9.14E-01 | 9.89E-01 |
| <b>FAM25BP</b>     | 1.06  | 7.31E-01 | 1.00E+00 | -0.09 | 9.14E-01 | 9.89E-01 |
| <b>AC079148.1</b>  | 0.25  | 8.30E-01 | 1.00E+00 | -0.14 | 9.14E-01 | 9.89E-01 |
| <b>TNNT3</b>       | -1.56 | 1.59E-03 | 2.22E-01 | -0.06 | 9.14E-01 | 9.89E-01 |
| <b>MHENCR</b>      | -0.48 | 2.43E-01 | 1.00E+00 | -0.04 | 9.14E-01 | 9.89E-01 |
| <b>GPR19</b>       | 0.56  | 5.80E-01 | 1.00E+00 | 0.09  | 9.14E-01 | 9.89E-01 |
| <b>XLOC_011034</b> | NA    | NA       | NA       | -0.08 | 9.14E-01 | 9.89E-01 |
| <b>TCERG1</b>      | -0.31 | 2.12E-01 | 1.00E+00 | -0.02 | 9.14E-01 | 9.89E-01 |
| <b>MAF1</b>        | 0.08  | 7.02E-01 | 1.00E+00 | 0.04  | 9.14E-01 | 9.89E-01 |
| <b>AP001999.1</b>  | 1.46  | 2.07E-01 | 1.00E+00 | -0.20 | 9.14E-01 | 9.89E-01 |
| <b>RHPN1</b>       | -1.31 | 1.29E-04 | 3.03E-02 | 0.09  | 9.14E-01 | 9.89E-01 |
| <b>TNK1</b>        | -0.31 | 1.92E-01 | 1.00E+00 | 0.06  | 9.14E-01 | 9.89E-01 |
| <b>EPHX1</b>       | 0.65  | 2.29E-01 | 1.00E+00 | 0.04  | 9.14E-01 | 9.89E-01 |
| <b>GPRIN2</b>      | 0.06  | 9.08E-01 | 1.00E+00 | 0.07  | 9.14E-01 | 9.89E-01 |
| <b>PKP3</b>        | -0.28 | 5.86E-01 | 1.00E+00 | -0.07 | 9.14E-01 | 9.89E-01 |
| <b>TMEM254-AS1</b> | -0.05 | 8.88E-01 | 1.00E+00 | 0.05  | 9.14E-01 | 9.89E-01 |
| <b>KCTD8</b>       | 1.71  | 1.49E-01 | 1.00E+00 | 0.11  | 9.14E-01 | 9.89E-01 |

|                   |       |          |          |       |          |          |
|-------------------|-------|----------|----------|-------|----------|----------|
| <b>AC104971.1</b> | -2.14 | 3.22E-01 | 1.00E+00 | 0.13  | 9.14E-01 | 9.89E-01 |
| <b>RNPEPL1</b>    | -0.02 | 9.36E-01 | 1.00E+00 | -0.06 | 9.15E-01 | 9.89E-01 |
| <b>AC006441.1</b> | 0.76  | 7.25E-01 | 1.00E+00 | -0.10 | 9.15E-01 | 9.89E-01 |
| <b>SEC24B-AS1</b> | 0.65  | 2.26E-01 | 1.00E+00 | -0.07 | 9.15E-01 | 9.89E-01 |
| <b>ARNT</b>       | 0.33  | 1.47E-01 | 1.00E+00 | -0.02 | 9.15E-01 | 9.89E-01 |
| <b>AC008764.8</b> | -1.93 | 9.93E-02 | 1.00E+00 | 0.05  | 9.15E-01 | 9.89E-01 |
| <b>NRF1</b>       | -0.13 | 5.34E-01 | 1.00E+00 | 0.04  | 9.15E-01 | 9.89E-01 |
| <b>AC108673.3</b> | -0.01 | 9.94E-01 | 1.00E+00 | 0.06  | 9.15E-01 | 9.89E-01 |
| <b>GAB3</b>       | 0.19  | 6.93E-01 | 1.00E+00 | 0.07  | 9.15E-01 | 9.89E-01 |
| <b>G2112</b>      | -0.25 | 8.39E-01 | 1.00E+00 | -0.09 | 9.15E-01 | 9.89E-01 |
| <b>EIF2B2</b>     | -0.29 | 8.77E-02 | 1.00E+00 | 0.02  | 9.15E-01 | 9.89E-01 |
| <b>AC093162.2</b> | -0.16 | 7.12E-01 | 1.00E+00 | 0.08  | 9.15E-01 | 9.89E-01 |
| <b>KIF25-AS1</b>  | -0.59 | 7.02E-01 | 1.00E+00 | 0.17  | 9.15E-01 | 9.89E-01 |
| <b>AC007496.2</b> | 0.90  | 4.93E-01 | 1.00E+00 | -0.12 | 9.15E-01 | 9.89E-01 |
| <b>MAP2K6</b>     | 0.16  | 4.34E-01 | 1.00E+00 | 0.03  | 9.15E-01 | 9.89E-01 |
| <b>AL646090.2</b> | -1.42 | 5.65E-01 | 1.00E+00 | 0.12  | 9.15E-01 | 9.89E-01 |
| <b>FXR2</b>       | -0.01 | 9.61E-01 | 1.00E+00 | -0.06 | 9.15E-01 | 9.89E-01 |
| <b>MBLAC1</b>     | -0.08 | 8.30E-01 | 1.00E+00 | -0.10 | 9.15E-01 | 9.89E-01 |
| <b>ZFP2</b>       | 0.46  | 3.00E-01 | 1.00E+00 | -0.06 | 9.15E-01 | 9.89E-01 |
| <b>AL357079.1</b> | 0.47  | 6.73E-01 | 1.00E+00 | -0.11 | 9.15E-01 | 9.89E-01 |
| <b>GTF3C4</b>     | -0.02 | 9.22E-01 | 1.00E+00 | -0.03 | 9.16E-01 | 9.89E-01 |
| <b>5-Mar</b>      | 0.20  | 3.82E-01 | 1.00E+00 | -0.02 | 9.16E-01 | 9.89E-01 |
| <b>LTN1</b>       | 0.04  | 9.01E-01 | 1.00E+00 | -0.02 | 9.16E-01 | 9.89E-01 |
| <b>AC084876.2</b> | -1.43 | 3.09E-01 | 1.00E+00 | -0.13 | 9.16E-01 | 9.89E-01 |
| <b>IRX1</b>       | 0.02  | 9.63E-01 | 1.00E+00 | -0.07 | 9.16E-01 | 9.89E-01 |
| <b>RAN</b>        | -0.11 | 6.36E-01 | 1.00E+00 | -0.02 | 9.16E-01 | 9.89E-01 |
| <b>CBLN2</b>      | -0.85 | 7.66E-01 | 1.00E+00 | -0.11 | 9.16E-01 | 9.89E-01 |
| <b>COX20P1</b>    | 5.78  | 2.49E-02 | 9.28E-01 | 0.33  | 9.16E-01 | 9.89E-01 |
| <b>SLC39A8</b>    | -0.14 | 7.93E-01 | 1.00E+00 | -0.05 | 9.16E-01 | 9.89E-01 |
| <b>AHI1</b>       | 0.37  | 1.40E-01 | 1.00E+00 | -0.02 | 9.16E-01 | 9.89E-01 |
| <b>PCK2</b>       | -0.20 | 4.20E-01 | 1.00E+00 | 0.05  | 9.16E-01 | 9.89E-01 |
| <b>Z83847.1</b>   | -3.59 | 2.75E-01 | 1.00E+00 | -0.11 | 9.16E-01 | 9.89E-01 |

|                   |       |          |          |       |          |          |
|-------------------|-------|----------|----------|-------|----------|----------|
| <b>POLN</b>       | 0.28  | 7.16E-01 | 1.00E+00 | 0.10  | 9.16E-01 | 9.89E-01 |
| <b>SNAPC5</b>     | 0.06  | 7.68E-01 | 1.00E+00 | -0.02 | 9.16E-01 | 9.89E-01 |
| <b>MUC20</b>      | -1.83 | 1.38E-01 | 1.00E+00 | 0.08  | 9.16E-01 | 9.89E-01 |
| <b>G30851</b>     | 1.15  | 8.48E-02 | 1.00E+00 | 0.29  | 9.16E-01 | 9.89E-01 |
| <b>PLCB1</b>      | -0.01 | 9.82E-01 | 1.00E+00 | -0.06 | 9.16E-01 | 9.89E-01 |
| <b>VPS33B-DT</b>  | -0.54 | 2.86E-01 | 1.00E+00 | -0.06 | 9.16E-01 | 9.89E-01 |
| <b>MARVELD3</b>   | 0.21  | 5.06E-01 | 1.00E+00 | -0.07 | 9.16E-01 | 9.89E-01 |
| <b>PYCR2</b>      | 0.13  | 6.27E-01 | 1.00E+00 | -0.03 | 9.16E-01 | 9.89E-01 |
| <b>AC009560.1</b> | -0.20 | 9.31E-01 | 1.00E+00 | -0.07 | 9.16E-01 | 9.89E-01 |
| <b>TRNP1</b>      | -0.06 | 7.88E-01 | 1.00E+00 | -0.06 | 9.16E-01 | 9.89E-01 |
| <b>TINAGL1</b>    | 0.07  | 8.86E-01 | 1.00E+00 | -0.09 | 9.16E-01 | 9.89E-01 |
| <b>SDC4</b>       | 0.01  | 9.80E-01 | 1.00E+00 | 0.04  | 9.16E-01 | 9.89E-01 |
| <b>ASB6</b>       | -0.27 | 2.83E-01 | 1.00E+00 | 0.03  | 9.16E-01 | 9.89E-01 |
| <b>MRPL27</b>     | -0.08 | 7.40E-01 | 1.00E+00 | 0.03  | 9.16E-01 | 9.89E-01 |
| <b>TAPBP</b>      | -0.34 | 3.08E-01 | 1.00E+00 | 0.03  | 9.17E-01 | 9.89E-01 |
| <b>GTPBP3</b>     | -0.16 | 5.57E-01 | 1.00E+00 | 0.03  | 9.17E-01 | 9.89E-01 |
| <b>DPP7</b>       | -0.10 | 6.16E-01 | 1.00E+00 | -0.02 | 9.17E-01 | 9.89E-01 |
| <b>AP002992.1</b> | -3.29 | 1.99E-01 | 1.00E+00 | 0.18  | 9.17E-01 | 9.89E-01 |
| <b>G10909</b>     | 0.67  | 4.75E-01 | 1.00E+00 | -0.08 | 9.17E-01 | 9.89E-01 |
| <b>KLK7</b>       | -0.02 | 9.70E-01 | 1.00E+00 | 0.08  | 9.17E-01 | 9.89E-01 |
| <b>AL450998.2</b> | -1.24 | 4.33E-01 | 1.00E+00 | 0.10  | 9.17E-01 | 9.89E-01 |
| <b>RERGL</b>      | -0.11 | 8.72E-01 | 1.00E+00 | -0.07 | 9.17E-01 | 9.89E-01 |
| <b>PMPCA</b>      | -0.05 | 7.90E-01 | 1.00E+00 | -0.02 | 9.17E-01 | 9.89E-01 |
| <b>KLHL5</b>      | 0.07  | 8.86E-01 | 1.00E+00 | -0.06 | 9.17E-01 | 9.89E-01 |
| <b>SCAF11</b>     | -0.16 | 4.18E-01 | 1.00E+00 | -0.02 | 9.17E-01 | 9.89E-01 |
| <b>SERPINB5</b>   | -0.13 | 7.98E-01 | 1.00E+00 | 0.07  | 9.17E-01 | 9.89E-01 |
| <b>SPDYE12P</b>   | -0.14 | 8.15E-01 | 1.00E+00 | -0.06 | 9.17E-01 | 9.89E-01 |
| <b>AC024568.1</b> | 1.81  | 2.65E-01 | 1.00E+00 | 0.10  | 9.17E-01 | 9.89E-01 |
| <b>AL139274.2</b> | 0.22  | 7.29E-01 | 1.00E+00 | 0.07  | 9.17E-01 | 9.89E-01 |
| <b>ZC3H7A</b>     | 0.18  | 4.25E-01 | 1.00E+00 | -0.03 | 9.17E-01 | 9.89E-01 |
| <b>USP43</b>      | -0.52 | 1.85E-01 | 1.00E+00 | 0.08  | 9.17E-01 | 9.89E-01 |
| <b>POLR3C</b>     | 0.03  | 8.71E-01 | 1.00E+00 | -0.02 | 9.17E-01 | 9.89E-01 |

|                    |       |          |          |       |          |          |
|--------------------|-------|----------|----------|-------|----------|----------|
| <b>CAND2</b>       | 0.01  | 9.88E-01 | 1.00E+00 | 0.10  | 9.17E-01 | 9.89E-01 |
| <b>RPS27AP1</b>    | NA    | NA       | NA       | 0.32  | 9.17E-01 | 9.89E-01 |
| <b>CAPNS2</b>      | -0.07 | 8.41E-01 | 1.00E+00 | -0.06 | 9.17E-01 | 9.89E-01 |
| <b>NAIF1</b>       | 0.05  | 8.30E-01 | 1.00E+00 | 0.05  | 9.17E-01 | 9.89E-01 |
| <b>AC243960.2</b>  | -2.58 | 1.33E-01 | 1.00E+00 | -0.04 | 9.17E-01 | 9.89E-01 |
| <b>RAD51AP1</b>    | -0.21 | 5.37E-01 | 1.00E+00 | 0.04  | 9.17E-01 | 9.89E-01 |
| <b>TEX21P</b>      | 0.66  | 5.61E-01 | 1.00E+00 | 0.07  | 9.17E-01 | 9.89E-01 |
| <b>NDUFS1</b>      | -0.06 | 7.38E-01 | 1.00E+00 | -0.02 | 9.17E-01 | 9.89E-01 |
| <b>SLC4A1AP</b>    | -0.17 | 3.50E-01 | 1.00E+00 | 0.02  | 9.17E-01 | 9.89E-01 |
| <b>SLC19A1</b>     | 0.13  | 7.84E-01 | 1.00E+00 | 0.06  | 9.17E-01 | 9.89E-01 |
| <b>XLOC_014362</b> | -0.83 | 7.32E-01 | 1.00E+00 | 0.12  | 9.17E-01 | 9.89E-01 |
| <b>AC124068.2</b>  | 0.72  | 2.37E-01 | 1.00E+00 | -0.08 | 9.17E-01 | 9.89E-01 |
| <b>AL078581.3</b>  | -1.06 | 5.19E-01 | 1.00E+00 | 0.09  | 9.17E-01 | 9.89E-01 |
| <b>FOXL2NB</b>     | 0.42  | 7.26E-01 | 1.00E+00 | -0.15 | 9.18E-01 | 9.89E-01 |
| <b>KCNK10</b>      | 0.25  | 7.77E-01 | 1.00E+00 | -0.14 | 9.18E-01 | 9.89E-01 |
| <b>CCDC137</b>     | -0.16 | 5.73E-01 | 1.00E+00 | 0.04  | 9.18E-01 | 9.89E-01 |
| <b>PFN1</b>        | -0.10 | 5.93E-01 | 1.00E+00 | -0.03 | 9.18E-01 | 9.89E-01 |
| <b>GOLGA6A</b>     | 0.97  | 7.78E-01 | 1.00E+00 | -0.20 | 9.18E-01 | 9.89E-01 |
| <b>TOP2A</b>       | 0.13  | 6.13E-01 | 1.00E+00 | -0.06 | 9.18E-01 | 9.89E-01 |
| <b>LINC00941</b>   | -0.51 | 5.79E-01 | 1.00E+00 | -0.10 | 9.18E-01 | 9.89E-01 |
| <b>ARID4B</b>      | 0.14  | 5.92E-01 | 1.00E+00 | 0.02  | 9.18E-01 | 9.89E-01 |
| <b>SNX10</b>       | 0.98  | 2.82E-01 | 1.00E+00 | 0.07  | 9.18E-01 | 9.89E-01 |
| <b>CYS1</b>        | 0.14  | 7.96E-01 | 1.00E+00 | -0.08 | 9.18E-01 | 9.89E-01 |
| <b>GPR20</b>       | 0.53  | 4.83E-01 | 1.00E+00 | -0.11 | 9.18E-01 | 9.89E-01 |
| <b>PTH1R</b>       | 0.38  | 4.13E-01 | 1.00E+00 | -0.08 | 9.18E-01 | 9.89E-01 |
| <b>FZD4</b>        | 1.90  | 2.49E-02 | 9.28E-01 | 0.07  | 9.18E-01 | 9.89E-01 |
| <b>PLEKHS1</b>     | 0.04  | 9.72E-01 | 1.00E+00 | -0.31 | 9.18E-01 | 9.89E-01 |
| <b>PHF14</b>       | 0.03  | 8.87E-01 | 1.00E+00 | 0.04  | 9.18E-01 | 9.89E-01 |
| <b>RBM15</b>       | -0.05 | 8.51E-01 | 1.00E+00 | -0.04 | 9.18E-01 | 9.89E-01 |
| <b>HNRNPA3P3</b>   | 0.13  | 9.12E-01 | 1.00E+00 | 0.06  | 9.18E-01 | 9.89E-01 |
| <b>SLC8A2</b>      | -2.13 | 7.95E-03 | 5.48E-01 | 0.11  | 9.18E-01 | 9.89E-01 |
| <b>HIST1H4H</b>    | 0.21  | 5.94E-01 | 1.00E+00 | -0.04 | 9.18E-01 | 9.89E-01 |

|                    |       |          |          |       |          |          |
|--------------------|-------|----------|----------|-------|----------|----------|
| <b>RPL21P44</b>    | -1.24 | 3.18E-01 | 1.00E+00 | -0.08 | 9.18E-01 | 9.89E-01 |
| <b>NSA2</b>        | 0.00  | 9.98E-01 | 1.00E+00 | 0.03  | 9.18E-01 | 9.89E-01 |
| <b>GRXCR2</b>      | -0.19 | 8.32E-01 | 1.00E+00 | -0.10 | 9.18E-01 | 9.89E-01 |
| <b>SLC9B2</b>      | -0.23 | 4.31E-01 | 1.00E+00 | -0.04 | 9.18E-01 | 9.89E-01 |
| <b>TRIM73</b>      | -2.08 | 7.41E-02 | 1.00E+00 | 0.07  | 9.19E-01 | 9.89E-01 |
| <b>UBE2D3P2</b>    | -1.68 | 6.27E-01 | 1.00E+00 | 0.07  | 9.19E-01 | 9.89E-01 |
| <b>DTNBP1</b>      | 0.12  | 6.12E-01 | 1.00E+00 | 0.04  | 9.19E-01 | 9.89E-01 |
| <b>GUCA1B</b>      | -0.46 | 4.73E-01 | 1.00E+00 | -0.11 | 9.19E-01 | 9.89E-01 |
| <b>NAA16</b>       | 0.03  | 9.13E-01 | 1.00E+00 | 0.03  | 9.19E-01 | 9.89E-01 |
| <b>AQP10</b>       | -0.52 | 6.14E-01 | 1.00E+00 | -0.13 | 9.19E-01 | 9.89E-01 |
| <b>XLOC_009836</b> | 1.96  | 5.66E-01 | 1.00E+00 | -0.15 | 9.19E-01 | 9.89E-01 |
| <b>XLOC_008479</b> | 0.69  | 7.99E-01 | 1.00E+00 | -0.15 | 9.19E-01 | 9.89E-01 |
| <b>C1QTNF9B</b>    | 3.11  | 2.17E-01 | 1.00E+00 | 0.11  | 9.19E-01 | 9.89E-01 |
| <b>MLC1</b>        | -0.99 | 7.11E-03 | 5.13E-01 | 0.08  | 9.19E-01 | 9.89E-01 |
| <b>JARID2</b>      | -0.60 | 8.00E-02 | 1.00E+00 | 0.04  | 9.19E-01 | 9.89E-01 |
| <b>KIR3DL1</b>     | -0.12 | 9.73E-01 | 1.00E+00 | -0.20 | 9.19E-01 | 9.89E-01 |
| <b>COG5</b>        | 0.02  | 9.17E-01 | 1.00E+00 | -0.02 | 9.19E-01 | 9.89E-01 |
| <b>RPL10P9</b>     | -0.20 | 5.07E-01 | 1.00E+00 | -0.05 | 9.19E-01 | 9.89E-01 |
| <b>ACTN2</b>       | -1.07 | 3.12E-01 | 1.00E+00 | -0.28 | 9.19E-01 | 9.89E-01 |
| <b>DHRS4</b>       | -0.16 | 4.91E-01 | 1.00E+00 | -0.02 | 9.19E-01 | 9.89E-01 |
| <b>AC008026.1</b>  | -0.84 | 6.00E-01 | 1.00E+00 | 0.07  | 9.19E-01 | 9.89E-01 |
| <b>DNAAF5</b>      | -0.13 | 5.65E-01 | 1.00E+00 | 0.04  | 9.19E-01 | 9.89E-01 |
| <b>AC116614.1</b>  | 5.30  | 1.48E-02 | 7.62E-01 | 0.13  | 9.19E-01 | 9.89E-01 |
| <b>EIF2S2</b>      | 0.02  | 8.91E-01 | 1.00E+00 | 0.03  | 9.19E-01 | 9.89E-01 |
| <b>STEAP1</b>      | 0.64  | 2.24E-01 | 1.00E+00 | -0.06 | 9.19E-01 | 9.89E-01 |
| <b>POLR2J</b>      | -0.25 | 3.52E-01 | 1.00E+00 | -0.02 | 9.19E-01 | 9.89E-01 |
| <b>AC244021.1</b>  | 0.42  | 5.64E-01 | 1.00E+00 | -0.11 | 9.19E-01 | 9.89E-01 |
| <b>AL133216.2</b>  | -0.38 | 3.62E-01 | 1.00E+00 | 0.07  | 9.19E-01 | 9.89E-01 |
| <b>XLOC_004420</b> | -0.37 | 3.02E-01 | 1.00E+00 | -0.13 | 9.19E-01 | 9.89E-01 |
| <b>BRPF1</b>       | -0.42 | 9.26E-02 | 1.00E+00 | -0.07 | 9.19E-01 | 9.89E-01 |
| <b>INTS12</b>      | -0.26 | 2.19E-01 | 1.00E+00 | 0.04  | 9.19E-01 | 9.89E-01 |
| <b>AL512324.3</b>  | 1.77  | 2.20E-01 | 1.00E+00 | 0.10  | 9.20E-01 | 9.89E-01 |

|            |       |          |          |       |          |          |
|------------|-------|----------|----------|-------|----------|----------|
| SLC30A6    | 0.33  | 2.05E-01 | 1.00E+00 | -0.02 | 9.20E-01 | 9.89E-01 |
| PRC1       | -1.99 | 4.21E-01 | 1.00E+00 | 0.08  | 9.20E-01 | 9.89E-01 |
| ZNF157     | 1.59  | 1.27E-01 | 1.00E+00 | 0.13  | 9.20E-01 | 9.89E-01 |
| AC091825.1 | -0.13 | 8.03E-01 | 1.00E+00 | -0.06 | 9.20E-01 | 9.89E-01 |
| AL162171.1 | -0.01 | 9.82E-01 | 1.00E+00 | -0.04 | 9.20E-01 | 9.89E-01 |
| EHMT2      | -0.10 | 6.53E-01 | 1.00E+00 | 0.05  | 9.20E-01 | 9.89E-01 |
| TSPEAR-AS2 | -1.38 | 5.46E-01 | 1.00E+00 | 0.20  | 9.20E-01 | 9.89E-01 |
| AC008083.2 | -2.58 | 2.57E-01 | 1.00E+00 | 0.09  | 9.20E-01 | 9.89E-01 |
| SNN        | 0.12  | 7.34E-01 | 1.00E+00 | 0.05  | 9.20E-01 | 9.89E-01 |
| CPB1       | -0.34 | 7.21E-01 | 1.00E+00 | -0.08 | 9.20E-01 | 9.89E-01 |
| SNHG22     | 0.34  | 9.15E-01 | 1.00E+00 | 0.08  | 9.20E-01 | 9.89E-01 |
| AFP        | 3.24  | 2.29E-01 | 1.00E+00 | -0.20 | 9.20E-01 | 9.89E-01 |
| AIRE       | 0.05  | 9.31E-01 | 1.00E+00 | 0.10  | 9.20E-01 | 9.89E-01 |
| LSMEM2     | 0.35  | 7.76E-01 | 1.00E+00 | 0.13  | 9.21E-01 | 9.89E-01 |
| BUD23      | -0.12 | 5.09E-01 | 1.00E+00 | -0.02 | 9.21E-01 | 9.89E-01 |
| AC093535.2 | 0.04  | 9.40E-01 | 1.00E+00 | -0.05 | 9.21E-01 | 9.89E-01 |
| HNRNPRP1   | NA    | NA       | NA       | 0.07  | 9.21E-01 | 9.89E-01 |
| KRT31      | -0.52 | 8.69E-01 | 1.00E+00 | -0.09 | 9.21E-01 | 9.89E-01 |
| CYB561     | 0.08  | 6.85E-01 | 1.00E+00 | -0.02 | 9.21E-01 | 9.89E-01 |
| SRD5A3-AS1 | 0.04  | 9.74E-01 | 1.00E+00 | 0.08  | 9.21E-01 | 9.89E-01 |
| UHMK1      | 0.33  | 3.19E-01 | 1.00E+00 | 0.03  | 9.21E-01 | 9.89E-01 |
| CLCN7      | -0.17 | 3.74E-01 | 1.00E+00 | 0.31  | 9.21E-01 | 9.89E-01 |
| FICD       | -0.13 | 7.70E-01 | 1.00E+00 | 0.03  | 9.21E-01 | 9.89E-01 |
| AC079174.2 | -0.36 | 6.95E-01 | 1.00E+00 | -0.08 | 9.21E-01 | 9.89E-01 |
| G40298     | 1.37  | 2.91E-01 | 1.00E+00 | 0.13  | 9.21E-01 | 9.89E-01 |
| Z99943.2   | 0.97  | 7.78E-01 | 1.00E+00 | -0.07 | 9.21E-01 | 9.89E-01 |
| TMEM30B    | 0.03  | 8.93E-01 | 1.00E+00 | -0.04 | 9.21E-01 | 9.89E-01 |
| DR1        | 0.32  | 2.46E-01 | 1.00E+00 | -0.02 | 9.21E-01 | 9.89E-01 |
| TRIM44     | 0.10  | 7.08E-01 | 1.00E+00 | 0.04  | 9.21E-01 | 9.89E-01 |
| LRRC9      | -3.82 | 2.20E-01 | 1.00E+00 | -0.32 | 9.21E-01 | 9.89E-01 |
| WBP1LP2    | -1.58 | 2.00E-01 | 1.00E+00 | -0.08 | 9.21E-01 | 9.89E-01 |
| TGFBRAP1   | -0.25 | 2.28E-01 | 1.00E+00 | -0.03 | 9.21E-01 | 9.89E-01 |

|             |       |          |          |       |          |          |
|-------------|-------|----------|----------|-------|----------|----------|
| MAP2K3      | -0.24 | 4.83E-01 | 1.00E+00 | -0.03 | 9.21E-01 | 9.89E-01 |
| HNRNPH1     | -0.20 | 2.19E-01 | 1.00E+00 | 0.02  | 9.21E-01 | 9.89E-01 |
| ADAMTS17    | -0.28 | 3.73E-01 | 1.00E+00 | -0.07 | 9.21E-01 | 9.89E-01 |
| SLCO5A1     | -0.21 | 4.99E-01 | 1.00E+00 | -0.10 | 9.21E-01 | 9.89E-01 |
| PGR-AS1     | 1.02  | 7.67E-01 | 1.00E+00 | 0.12  | 9.21E-01 | 9.89E-01 |
| AP001432.1  | -0.66 | 7.17E-01 | 1.00E+00 | 0.13  | 9.22E-01 | 9.89E-01 |
| AC093323.1  | 0.13  | 6.32E-01 | 1.00E+00 | -0.05 | 9.22E-01 | 9.89E-01 |
| RNF112      | 0.10  | 8.54E-01 | 1.00E+00 | 0.12  | 9.22E-01 | 9.89E-01 |
| KPNA1       | 0.09  | 6.65E-01 | 1.00E+00 | 0.02  | 9.22E-01 | 9.89E-01 |
| VDAC1P2     | 2.46  | 4.70E-01 | 1.00E+00 | -0.08 | 9.22E-01 | 9.89E-01 |
| CENPM       | -0.32 | 4.81E-01 | 1.00E+00 | 0.05  | 9.22E-01 | 9.89E-01 |
| KRT86       | -1.42 | 6.57E-01 | 1.00E+00 | 0.11  | 9.22E-01 | 9.89E-01 |
| CLNK        | -1.27 | 2.16E-01 | 1.00E+00 | -0.09 | 9.22E-01 | 9.89E-01 |
| ATF3        | -2.11 | 6.26E-02 | 1.00E+00 | 0.06  | 9.22E-01 | 9.89E-01 |
| USP54       | -0.01 | 9.81E-01 | 1.00E+00 | 0.04  | 9.22E-01 | 9.89E-01 |
| XLOC_003400 | -0.69 | 3.16E-01 | 1.00E+00 | 0.11  | 9.22E-01 | 9.89E-01 |
| FBXW4P1     | -0.51 | 4.80E-01 | 1.00E+00 | -0.09 | 9.22E-01 | 9.89E-01 |
| RASL12      | -0.26 | 5.64E-01 | 1.00E+00 | -0.07 | 9.22E-01 | 9.89E-01 |
| NR2F1       | -0.28 | 5.54E-01 | 1.00E+00 | 0.08  | 9.22E-01 | 9.89E-01 |
| SCYGR6      | -8.50 | 1.46E-02 | 7.60E-01 | 0.31  | 9.22E-01 | 9.89E-01 |
| AL022326.2  | 0.40  | 6.56E-01 | 1.00E+00 | -0.07 | 9.22E-01 | 9.89E-01 |
| LINC02035   | 0.30  | 4.01E-01 | 1.00E+00 | 0.05  | 9.23E-01 | 9.89E-01 |
| C11orf49    | -0.16 | 6.35E-01 | 1.00E+00 | -0.03 | 9.23E-01 | 9.89E-01 |
| BRD7        | -0.11 | 6.65E-01 | 1.00E+00 | -0.03 | 9.23E-01 | 9.89E-01 |
| CLCN4       | 0.26  | 6.09E-01 | 1.00E+00 | 0.06  | 9.23E-01 | 9.89E-01 |
| EFCAB12     | 1.66  | 2.29E-01 | 1.00E+00 | -0.08 | 9.23E-01 | 9.89E-01 |
| HOXB1       | 1.21  | 2.12E-01 | 1.00E+00 | 0.09  | 9.23E-01 | 9.89E-01 |
| DEFB4B      | 0.00  | 1.00E+00 | NA       | -0.31 | 9.23E-01 | 9.89E-01 |
| OIP5        | 0.08  | 8.43E-01 | 1.00E+00 | 0.05  | 9.23E-01 | 9.89E-01 |
| AC084116.1  | -1.24 | 7.15E-01 | 1.00E+00 | 0.31  | 9.23E-01 | 9.89E-01 |
| CHST7       | 0.15  | 6.83E-01 | 1.00E+00 | 0.06  | 9.23E-01 | 9.89E-01 |
| ZNF410      | 0.41  | 7.06E-01 | 1.00E+00 | -0.06 | 9.23E-01 | 9.89E-01 |

|                     |       |          |          |       |          |          |
|---------------------|-------|----------|----------|-------|----------|----------|
| <b>TNFRSF14-AS1</b> | 1.67  | 4.01E-01 | 1.00E+00 | 0.08  | 9.23E-01 | 9.89E-01 |
| <b>C1QL1</b>        | -1.17 | 6.48E-02 | 1.00E+00 | 0.10  | 9.23E-01 | 9.89E-01 |
| <b>G28347</b>       | 1.28  | 2.59E-01 | 1.00E+00 | -0.11 | 9.23E-01 | 9.89E-01 |
| <b>AC129507.1</b>   | -0.48 | 5.68E-01 | 1.00E+00 | -0.05 | 9.23E-01 | 9.89E-01 |
| <b>NBR1</b>         | -0.04 | 7.96E-01 | 1.00E+00 | -0.02 | 9.23E-01 | 9.89E-01 |
| <b>AC130689.1</b>   | -0.82 | 3.46E-01 | 1.00E+00 | 0.06  | 9.23E-01 | 9.89E-01 |
| <b>PUM3</b>         | -0.18 | 5.52E-01 | 1.00E+00 | -0.02 | 9.23E-01 | 9.89E-01 |
| <b>BRAT1</b>        | -0.11 | 5.66E-01 | 1.00E+00 | -0.04 | 9.23E-01 | 9.89E-01 |
| <b>WRN</b>          | 0.05  | 8.57E-01 | 1.00E+00 | -0.04 | 9.23E-01 | 9.89E-01 |
| <b>RHD</b>          | 0.02  | 9.73E-01 | 1.00E+00 | 0.09  | 9.23E-01 | 9.89E-01 |
| <b>TNPO3</b>        | 0.14  | 4.00E-01 | 1.00E+00 | 0.01  | 9.23E-01 | 9.89E-01 |
| <b>AP003080.1</b>   | 0.11  | 9.15E-01 | 1.00E+00 | -0.16 | 9.23E-01 | 9.89E-01 |
| <b>TSPYL5</b>       | 0.05  | 8.55E-01 | 1.00E+00 | -0.05 | 9.23E-01 | 9.89E-01 |
| <b>SYT7</b>         | -0.41 | 5.00E-01 | 1.00E+00 | 0.06  | 9.23E-01 | 9.89E-01 |
| <b>AL645929.2</b>   | 1.10  | 4.39E-01 | 1.00E+00 | 0.11  | 9.23E-01 | 9.89E-01 |
| <b>AL355312.5</b>   | 0.79  | 1.62E-01 | 1.00E+00 | -0.07 | 9.23E-01 | 9.89E-01 |
| <b>SLC9A7</b>       | -0.15 | 7.49E-01 | 1.00E+00 | -0.05 | 9.23E-01 | 9.89E-01 |
| <b>CLEC6A</b>       | -2.78 | 4.14E-01 | 1.00E+00 | 0.31  | 9.23E-01 | 9.89E-01 |
| <b>HOXD-AS2</b>     | 0.81  | 7.99E-02 | 1.00E+00 | -0.10 | 9.23E-01 | 9.89E-01 |
| <b>XLOC_012406</b>  | 1.27  | 2.63E-01 | 1.00E+00 | -0.07 | 9.23E-01 | 9.89E-01 |
| <b>HSPH1</b>        | -0.10 | 7.67E-01 | 1.00E+00 | 0.03  | 9.24E-01 | 9.89E-01 |
| <b>INTS3</b>        | -0.10 | 6.68E-01 | 1.00E+00 | -0.04 | 9.24E-01 | 9.89E-01 |
| <b>DCTN3</b>        | -0.12 | 5.22E-01 | 1.00E+00 | 0.02  | 9.24E-01 | 9.89E-01 |
| <b>CEP97</b>        | -0.13 | 6.49E-01 | 1.00E+00 | -0.03 | 9.24E-01 | 9.89E-01 |
| <b>BARD1</b>        | 0.05  | 8.76E-01 | 1.00E+00 | -0.05 | 9.24E-01 | 9.89E-01 |
| <b>SHE</b>          | 0.15  | 7.19E-01 | 1.00E+00 | 0.07  | 9.24E-01 | 9.89E-01 |
| <b>RAB27A</b>       | -0.13 | 5.26E-01 | 1.00E+00 | 0.02  | 9.24E-01 | 9.89E-01 |
| <b>CPB2</b>         | 1.27  | 7.13E-01 | 1.00E+00 | -0.15 | 9.24E-01 | 9.89E-01 |
| <b>FGFR4</b>        | -0.74 | 2.10E-01 | 1.00E+00 | -0.09 | 9.24E-01 | 9.89E-01 |
| <b>TCN1</b>         | -1.95 | 1.14E-01 | 1.00E+00 | 0.30  | 9.24E-01 | 9.89E-01 |
| <b>ACSF3</b>        | -0.22 | 3.53E-01 | 1.00E+00 | 0.02  | 9.24E-01 | 9.89E-01 |
| <b>AL117341.1</b>   | -0.56 | 8.73E-01 | 1.00E+00 | 0.12  | 9.24E-01 | 9.89E-01 |



|                   |       |          |          |       |          |          |
|-------------------|-------|----------|----------|-------|----------|----------|
| <b>HLA-DRB5</b>   | -0.52 | 4.11E-01 | 1.00E+00 | 0.05  | 9.24E-01 | 9.89E-01 |
| <b>CCNB2</b>      | 0.19  | 5.57E-01 | 1.00E+00 | 0.05  | 9.24E-01 | 9.89E-01 |
| <b>ZNF503-AS1</b> | -1.13 | 5.24E-02 | 1.00E+00 | 0.06  | 9.24E-01 | 9.90E-01 |
| <b>THEM5</b>      | 0.13  | 7.93E-01 | 1.00E+00 | -0.06 | 9.24E-01 | 9.90E-01 |
| <b>PKP4-AS1</b>   | 0.31  | 6.54E-01 | 1.00E+00 | -0.05 | 9.24E-01 | 9.90E-01 |
| <b>XPC</b>        | -0.04 | 8.45E-01 | 1.00E+00 | 0.02  | 9.24E-01 | 9.90E-01 |
| <b>KBTBD12</b>    | 0.42  | 5.44E-01 | 1.00E+00 | -0.11 | 9.24E-01 | 9.90E-01 |
| <b>AC005332.2</b> | 0.34  | 8.05E-01 | 1.00E+00 | -0.15 | 9.25E-01 | 9.90E-01 |
| <b>AC139792.1</b> | -0.05 | 9.77E-01 | 1.00E+00 | -0.12 | 9.25E-01 | 9.90E-01 |
| <b>SDCBPP3</b>    | NA    | NA       | NA       | -0.09 | 9.25E-01 | 9.90E-01 |
| <b>AC009126.1</b> | -0.54 | 1.46E-01 | 1.00E+00 | 0.05  | 9.25E-01 | 9.90E-01 |
| <b>ZFYVE1</b>     | 0.12  | 5.33E-01 | 1.00E+00 | 0.03  | 9.25E-01 | 9.90E-01 |
| <b>TOGARAM1</b>   | 0.27  | 1.75E-01 | 1.00E+00 | 0.02  | 9.25E-01 | 9.90E-01 |
| <b>DVL3</b>       | -0.25 | 1.86E-01 | 1.00E+00 | -0.05 | 9.25E-01 | 9.90E-01 |
| <b>AC007262.2</b> | -0.57 | 5.48E-01 | 1.00E+00 | -0.07 | 9.25E-01 | 9.90E-01 |
| <b>DAW1</b>       | -2.33 | 2.04E-01 | 1.00E+00 | -0.12 | 9.25E-01 | 9.90E-01 |
| <b>AC068631.3</b> | -0.71 | 8.37E-01 | 1.00E+00 | -0.07 | 9.25E-01 | 9.90E-01 |
| <b>PLEKHB1</b>    | -0.15 | 8.37E-01 | 1.00E+00 | -0.05 | 9.25E-01 | 9.90E-01 |
| <b>NFX1</b>       | -0.05 | 7.59E-01 | 1.00E+00 | 0.02  | 9.25E-01 | 9.90E-01 |
| <b>PIK3R3</b>     | 0.41  | 4.35E-01 | 1.00E+00 | 0.04  | 9.25E-01 | 9.90E-01 |
| <b>HBA2</b>       | 1.33  | 3.06E-02 | 1.00E+00 | -0.29 | 9.25E-01 | 9.90E-01 |
| <b>PTPRK</b>      | -0.27 | 1.61E-01 | 1.00E+00 | -0.02 | 9.25E-01 | 9.90E-01 |
| <b>SAYSD1</b>     | 0.00  | 9.99E-01 | 1.00E+00 | 0.02  | 9.25E-01 | 9.90E-01 |
| <b>AC073367.1</b> | 0.01  | 9.95E-01 | 1.00E+00 | -0.10 | 9.25E-01 | 9.90E-01 |
| <b>RPL7P32</b>    | 0.41  | 6.17E-01 | 1.00E+00 | 0.08  | 9.25E-01 | 9.90E-01 |
| <b>COX4I1</b>     | -0.07 | 7.45E-01 | 1.00E+00 | 0.02  | 9.25E-01 | 9.90E-01 |
| <b>AC104794.2</b> | -0.18 | 6.11E-01 | 1.00E+00 | 0.03  | 9.25E-01 | 9.90E-01 |
| <b>TAB3</b>       | -0.02 | 9.35E-01 | 1.00E+00 | -0.04 | 9.25E-01 | 9.90E-01 |
| <b>UBE2E1-AS1</b> | -1.35 | 5.76E-01 | 1.00E+00 | -0.15 | 9.25E-01 | 9.90E-01 |
| <b>ATXN7</b>      | -0.17 | 4.07E-01 | 1.00E+00 | -0.03 | 9.25E-01 | 9.90E-01 |
| <b>DNM2</b>       | -0.10 | 6.72E-01 | 1.00E+00 | 0.05  | 9.25E-01 | 9.90E-01 |
| <b>RPL7L1P8</b>   | 2.26  | 5.07E-01 | 1.00E+00 | -0.12 | 9.25E-01 | 9.90E-01 |

|                    |       |          |          |       |          |          |
|--------------------|-------|----------|----------|-------|----------|----------|
| <b>ARL10</b>       | 0.05  | 8.81E-01 | 1.00E+00 | -0.06 | 9.25E-01 | 9.90E-01 |
| <b>EDN2</b>        | -1.94 | 2.52E-02 | 9.28E-01 | -0.07 | 9.25E-01 | 9.90E-01 |
| <b>AL133245.1</b>  | 1.95  | 3.17E-01 | 1.00E+00 | -0.09 | 9.25E-01 | 9.90E-01 |
| <b>CTAG2</b>       | 0.00  | 1.00E+00 | NA       | -0.30 | 9.25E-01 | 9.90E-01 |
| <b>LOR</b>         | 0.24  | 6.92E-01 | 1.00E+00 | 0.29  | 9.26E-01 | 9.90E-01 |
| <b>SH2B2</b>       | -0.19 | 6.64E-01 | 1.00E+00 | -0.29 | 9.26E-01 | 9.90E-01 |
| <b>AC079907.1</b>  | -0.06 | 9.86E-01 | 1.00E+00 | 0.12  | 9.26E-01 | 9.90E-01 |
| <b>EEPD1</b>       | 0.33  | 2.95E-01 | 1.00E+00 | 0.04  | 9.26E-01 | 9.90E-01 |
| <b>AL049836.1</b>  | 0.04  | 9.78E-01 | 1.00E+00 | 0.13  | 9.26E-01 | 9.90E-01 |
| <b>AL157904.1</b>  | -2.71 | 2.81E-01 | 1.00E+00 | 0.12  | 9.26E-01 | 9.90E-01 |
| <b>HK1</b>         | -0.15 | 4.76E-01 | 1.00E+00 | -0.03 | 9.26E-01 | 9.90E-01 |
| <b>FLT1</b>        | 0.05  | 9.23E-01 | 1.00E+00 | -0.05 | 9.26E-01 | 9.90E-01 |
| <b>PAK1IP1</b>     | -0.13 | 5.48E-01 | 1.00E+00 | -0.03 | 9.26E-01 | 9.90E-01 |
| <b>CRB3</b>        | -0.08 | 8.46E-01 | 1.00E+00 | 0.05  | 9.26E-01 | 9.90E-01 |
| <b>AC002310.6</b>  | -0.15 | 6.17E-01 | 1.00E+00 | 0.29  | 9.26E-01 | 9.90E-01 |
| <b>CHD7</b>        | -0.18 | 5.65E-01 | 1.00E+00 | -0.03 | 9.26E-01 | 9.90E-01 |
| <b>G24514</b>      | -0.99 | 3.34E-01 | 1.00E+00 | -0.06 | 9.26E-01 | 9.90E-01 |
| <b>ATG4B</b>       | -0.10 | 6.09E-01 | 1.00E+00 | 0.01  | 9.26E-01 | 9.90E-01 |
| <b>DRAIC</b>       | -0.34 | 7.46E-01 | 1.00E+00 | -0.08 | 9.26E-01 | 9.90E-01 |
| <b>AC005261.1</b>  | 0.43  | 3.51E-01 | 1.00E+00 | 0.03  | 9.26E-01 | 9.90E-01 |
| <b>GIGYF2</b>      | -0.02 | 8.90E-01 | 1.00E+00 | -0.02 | 9.26E-01 | 9.90E-01 |
| <b>WHRN</b>        | -0.60 | 2.25E-02 | 9.03E-01 | 0.05  | 9.27E-01 | 9.90E-01 |
| <b>FAM229A</b>     | -1.23 | 9.01E-02 | 1.00E+00 | -0.06 | 9.27E-01 | 9.90E-01 |
| <b>DYNC1LI1</b>    | 0.08  | 7.82E-01 | 1.00E+00 | -0.03 | 9.27E-01 | 9.90E-01 |
| <b>FGF10</b>       | 0.96  | 2.05E-01 | 1.00E+00 | 0.18  | 9.27E-01 | 9.90E-01 |
| <b>AF131216.3</b>  | -1.23 | 5.36E-01 | 1.00E+00 | -0.09 | 9.27E-01 | 9.90E-01 |
| <b>AL355574.1</b>  | -0.69 | 2.93E-01 | 1.00E+00 | -0.07 | 9.27E-01 | 9.90E-01 |
| <b>AC011979.1</b>  | -0.31 | 8.63E-01 | 1.00E+00 | -0.07 | 9.27E-01 | 9.90E-01 |
| <b>XLOC_001751</b> | -0.24 | 5.93E-01 | 1.00E+00 | -0.07 | 9.27E-01 | 9.90E-01 |
| <b>PGA5</b>        | 2.74  | 8.81E-02 | 1.00E+00 | -0.13 | 9.27E-01 | 9.90E-01 |
| <b>AC002070.1</b>  | -1.79 | 2.91E-01 | 1.00E+00 | -0.11 | 9.27E-01 | 9.90E-01 |
| <b>TIAM2</b>       | -0.05 | 8.92E-01 | 1.00E+00 | -0.04 | 9.27E-01 | 9.90E-01 |

|             |       |          |          |       |          |          |
|-------------|-------|----------|----------|-------|----------|----------|
| ZNF746      | -0.37 | 1.14E-01 | 1.00E+00 | 0.06  | 9.27E-01 | 9.90E-01 |
| SIRT7       | -0.09 | 7.69E-01 | 1.00E+00 | -0.05 | 9.27E-01 | 9.90E-01 |
| G3383       | 0.13  | 7.00E-01 | 1.00E+00 | -0.05 | 9.27E-01 | 9.90E-01 |
| AL356235.1  | 0.66  | 3.79E-01 | 1.00E+00 | 0.06  | 9.27E-01 | 9.90E-01 |
| PSORS1C2    | 0.22  | 7.46E-01 | 1.00E+00 | 0.07  | 9.27E-01 | 9.90E-01 |
| AC068870.2  | -0.21 | 6.86E-01 | 1.00E+00 | -0.05 | 9.27E-01 | 9.90E-01 |
| DTWD1       | 0.10  | 7.10E-01 | 1.00E+00 | 0.03  | 9.27E-01 | 9.90E-01 |
| AC022400.1  | 1.22  | 3.70E-01 | 1.00E+00 | 0.08  | 9.27E-01 | 9.90E-01 |
| EBF3        | 0.11  | 7.93E-01 | 1.00E+00 | 0.07  | 9.27E-01 | 9.90E-01 |
| UBE4B       | 0.09  | 7.70E-01 | 1.00E+00 | 0.02  | 9.27E-01 | 9.90E-01 |
| ZNF574      | -0.17 | 4.94E-01 | 1.00E+00 | 0.02  | 9.28E-01 | 9.90E-01 |
| AC004241.3  | 1.26  | 6.56E-01 | 1.00E+00 | -0.05 | 9.28E-01 | 9.90E-01 |
| CPAMD8      | 1.26  | 1.05E-01 | 1.00E+00 | 0.07  | 9.28E-01 | 9.90E-01 |
| XLOC_000206 | -1.18 | 7.82E-02 | 1.00E+00 | 0.07  | 9.28E-01 | 9.90E-01 |
| SLC27A1     | 0.18  | 5.81E-01 | 1.00E+00 | 0.05  | 9.28E-01 | 9.90E-01 |
| G3793       | 0.38  | 7.04E-01 | 1.00E+00 | -0.11 | 9.28E-01 | 9.90E-01 |
| G23133      | 0.70  | 3.04E-01 | 1.00E+00 | -0.06 | 9.28E-01 | 9.90E-01 |
| MS4A14      | 0.41  | 7.31E-01 | 1.00E+00 | -0.11 | 9.28E-01 | 9.90E-01 |
| C11orf65    | -0.08 | 9.37E-01 | 1.00E+00 | 0.06  | 9.28E-01 | 9.90E-01 |
| SLC8A3      | 0.13  | 8.23E-01 | 1.00E+00 | -0.11 | 9.28E-01 | 9.90E-01 |
| GNB1        | 0.05  | 7.19E-01 | 1.00E+00 | 0.04  | 9.28E-01 | 9.90E-01 |
| WNT3A       | -1.08 | 2.59E-03 | 2.61E-01 | -0.06 | 9.28E-01 | 9.90E-01 |
| VANGL2      | -0.25 | 3.40E-01 | 1.00E+00 | -0.06 | 9.28E-01 | 9.90E-01 |
| CFAP69      | 0.35  | 5.28E-01 | 1.00E+00 | 0.06  | 9.28E-01 | 9.90E-01 |
| C19orf44    | -0.17 | 5.73E-01 | 1.00E+00 | 0.07  | 9.28E-01 | 9.90E-01 |
| CALCOCO1    | -0.23 | 4.15E-01 | 1.00E+00 | -0.02 | 9.28E-01 | 9.90E-01 |
| DUOX2       | 0.48  | 2.11E-01 | 1.00E+00 | -0.28 | 9.28E-01 | 9.90E-01 |
| AC083805.1  | 0.11  | 9.75E-01 | 1.00E+00 | 0.11  | 9.28E-01 | 9.90E-01 |
| FAM110C     | -0.11 | 7.66E-01 | 1.00E+00 | 0.06  | 9.28E-01 | 9.90E-01 |
| AC105020.5  | -1.46 | 1.82E-01 | 1.00E+00 | 0.12  | 9.28E-01 | 9.90E-01 |
| MAPK8IP2    | -1.07 | 4.79E-02 | 1.00E+00 | -0.06 | 9.28E-01 | 9.90E-01 |
| WSB2        | 0.27  | 7.55E-02 | 1.00E+00 | -0.04 | 9.28E-01 | 9.90E-01 |

|             |       |          |          |       |          |          |
|-------------|-------|----------|----------|-------|----------|----------|
| MCTP1       | 0.04  | 9.25E-01 | 1.00E+00 | -0.05 | 9.28E-01 | 9.90E-01 |
| CLDN16      | 0.74  | 6.67E-02 | 1.00E+00 | 0.06  | 9.28E-01 | 9.90E-01 |
| AC126283.1  | 2.77  | 3.18E-01 | 1.00E+00 | -0.10 | 9.29E-01 | 9.90E-01 |
| CLDN4       | 0.06  | 8.93E-01 | 1.00E+00 | 0.04  | 9.29E-01 | 9.90E-01 |
| AC005856.1  | 0.16  | 8.93E-01 | 1.00E+00 | 0.07  | 9.29E-01 | 9.90E-01 |
| TRPV4       | -0.17 | 6.70E-01 | 1.00E+00 | -0.04 | 9.29E-01 | 9.90E-01 |
| CAMK2N1     | -0.29 | 6.31E-01 | 1.00E+00 | -0.04 | 9.29E-01 | 9.90E-01 |
| XLOC_005798 | 2.80  | 1.49E-01 | 1.00E+00 | -0.28 | 9.29E-01 | 9.90E-01 |
| FBXW9       | -0.34 | 3.65E-01 | 1.00E+00 | -0.02 | 9.29E-01 | 9.90E-01 |
| PDZRN4      | 0.00  | 9.97E-01 | 1.00E+00 | -0.09 | 9.29E-01 | 9.90E-01 |
| AC008514.1  | 0.41  | 7.26E-01 | 1.00E+00 | -0.07 | 9.29E-01 | 9.90E-01 |
| CECR2       | -1.01 | 1.21E-01 | 1.00E+00 | 0.08  | 9.29E-01 | 9.90E-01 |
| TMEM214     | -0.07 | 6.41E-01 | 1.00E+00 | -0.04 | 9.29E-01 | 9.90E-01 |
| RXRA        | 0.00  | 9.97E-01 | 1.00E+00 | 0.04  | 9.29E-01 | 9.90E-01 |
| PTCH1       | 0.01  | 9.84E-01 | 1.00E+00 | -0.05 | 9.29E-01 | 9.90E-01 |
| AC025048.6  | 0.27  | 8.92E-01 | 1.00E+00 | -0.06 | 9.29E-01 | 9.90E-01 |
| DUBR        | 0.08  | 8.25E-01 | 1.00E+00 | -0.03 | 9.29E-01 | 9.90E-01 |
| SLC22A5     | 0.40  | 2.04E-01 | 1.00E+00 | -0.03 | 9.29E-01 | 9.90E-01 |
| AFAP1L2     | -0.51 | 8.53E-02 | 1.00E+00 | -0.03 | 9.29E-01 | 9.90E-01 |
| IFNG        | -2.43 | 4.80E-01 | 1.00E+00 | -0.28 | 9.29E-01 | 9.90E-01 |
| CILP2       | -0.43 | 8.53E-01 | 1.00E+00 | -0.28 | 9.29E-01 | 9.90E-01 |
| AC243960.1  | -3.28 | 1.85E-02 | 8.55E-01 | 0.06  | 9.29E-01 | 9.90E-01 |
| LCE2B       | 0.87  | 2.33E-01 | 1.00E+00 | -0.07 | 9.29E-01 | 9.90E-01 |
| THSD1       | -0.24 | 3.77E-01 | 1.00E+00 | -0.05 | 9.29E-01 | 9.90E-01 |
| SNHG4       | -1.55 | 6.93E-03 | 5.08E-01 | -0.06 | 9.29E-01 | 9.90E-01 |
| AL049557.2  | -0.90 | 7.83E-01 | 1.00E+00 | -0.10 | 9.30E-01 | 9.90E-01 |
| RPUSD3      | 0.06  | 7.61E-01 | 1.00E+00 | 0.02  | 9.30E-01 | 9.90E-01 |
| KCTD10      | 0.15  | 4.74E-01 | 1.00E+00 | -0.03 | 9.30E-01 | 9.90E-01 |
| AC107871.1  | -0.37 | 7.45E-01 | 1.00E+00 | -0.10 | 9.30E-01 | 9.90E-01 |
| SLC9A3R1    | -0.25 | 2.59E-01 | 1.00E+00 | -0.02 | 9.30E-01 | 9.90E-01 |
| FAM21B      | -0.11 | 9.51E-01 | 1.00E+00 | -0.21 | 9.30E-01 | 9.90E-01 |
| XLOC_008109 | 3.81  | 6.61E-02 | 1.00E+00 | 0.09  | 9.30E-01 | 9.90E-01 |

|                   |       |          |          |       |          |          |
|-------------------|-------|----------|----------|-------|----------|----------|
| <b>ERVE-1</b>     | -0.44 | 1.61E-01 | 1.00E+00 | -0.05 | 9.30E-01 | 9.90E-01 |
| <b>EEF1A1P22</b>  | -0.53 | 8.05E-01 | 1.00E+00 | -0.07 | 9.30E-01 | 9.90E-01 |
| <b>TMEM69</b>     | -0.04 | 8.78E-01 | 1.00E+00 | 0.02  | 9.30E-01 | 9.90E-01 |
| <b>ADO</b>        | -0.13 | 4.55E-01 | 1.00E+00 | 0.03  | 9.30E-01 | 9.90E-01 |
| <b>G5901</b>      | -1.33 | 4.99E-01 | 1.00E+00 | -0.12 | 9.30E-01 | 9.90E-01 |
| <b>SPAG7</b>      | -0.19 | 2.36E-01 | 1.00E+00 | 0.02  | 9.30E-01 | 9.90E-01 |
| <b>APTR</b>       | 0.28  | 3.03E-01 | 1.00E+00 | -0.03 | 9.30E-01 | 9.90E-01 |
| <b>RNF39</b>      | -0.20 | 6.80E-01 | 1.00E+00 | -0.05 | 9.30E-01 | 9.90E-01 |
| <b>FBXO28</b>     | -0.04 | 9.05E-01 | 1.00E+00 | 0.02  | 9.30E-01 | 9.90E-01 |
| <b>TMEM123</b>    | 0.14  | 5.72E-01 | 1.00E+00 | -0.02 | 9.30E-01 | 9.90E-01 |
| <b>AC025682.1</b> | 0.69  | 5.23E-01 | 1.00E+00 | 0.05  | 9.30E-01 | 9.90E-01 |
| <b>TNFSF15</b>    | 0.12  | 8.87E-01 | 1.00E+00 | -0.07 | 9.30E-01 | 9.90E-01 |
| <b>LINC01266</b>  | -0.96 | 4.09E-01 | 1.00E+00 | -0.09 | 9.30E-01 | 9.90E-01 |
| <b>AC112206.2</b> | 0.06  | 9.70E-01 | 1.00E+00 | -0.09 | 9.30E-01 | 9.90E-01 |
| <b>AL049775.2</b> | -0.93 | 6.22E-01 | 1.00E+00 | -0.10 | 9.30E-01 | 9.90E-01 |
| <b>ZNF658</b>     | 0.25  | 4.66E-01 | 1.00E+00 | -0.03 | 9.30E-01 | 9.90E-01 |
| <b>CEP120</b>     | 0.01  | 9.83E-01 | 1.00E+00 | -0.05 | 9.30E-01 | 9.90E-01 |
| <b>ZNF112</b>     | 0.67  | 5.54E-02 | 1.00E+00 | 0.03  | 9.30E-01 | 9.90E-01 |
| <b>CAPN1</b>      | -0.16 | 5.31E-01 | 1.00E+00 | 0.04  | 9.30E-01 | 9.90E-01 |
| <b>TBRG4</b>      | 0.13  | 5.06E-01 | 1.00E+00 | 0.02  | 9.30E-01 | 9.90E-01 |
| <b>PAN3-AS1</b>   | 0.63  | 3.05E-01 | 1.00E+00 | 0.08  | 9.30E-01 | 9.90E-01 |
| <b>AL357140.2</b> | -0.95 | 6.33E-01 | 1.00E+00 | 0.05  | 9.30E-01 | 9.90E-01 |
| <b>IQGAP1</b>     | -0.25 | 1.90E-01 | 1.00E+00 | -0.02 | 9.30E-01 | 9.90E-01 |
| <b>IRS2</b>       | -0.26 | 5.83E-01 | 1.00E+00 | 0.04  | 9.30E-01 | 9.90E-01 |
| <b>RPL7P26</b>    | -0.10 | 9.76E-01 | 1.00E+00 | 0.08  | 9.30E-01 | 9.90E-01 |
| <b>ATG4D</b>      | -0.05 | 8.40E-01 | 1.00E+00 | -0.05 | 9.30E-01 | 9.90E-01 |
| <b>LINC01127</b>  | 0.35  | 5.59E-01 | 1.00E+00 | -0.27 | 9.31E-01 | 9.90E-01 |
| <b>MECOM</b>      | 0.39  | 4.33E-01 | 1.00E+00 | -0.05 | 9.31E-01 | 9.90E-01 |
| <b>YTHDF3</b>     | 0.03  | 8.55E-01 | 1.00E+00 | 0.02  | 9.31E-01 | 9.90E-01 |
| <b>ZNF280B</b>    | -0.75 | 3.68E-01 | 1.00E+00 | -0.07 | 9.31E-01 | 9.90E-01 |
| <b>AC116562.4</b> | -1.58 | 2.23E-01 | 1.00E+00 | 0.07  | 9.31E-01 | 9.90E-01 |
| <b>CRYM</b>       | -0.85 | 1.08E-02 | 6.42E-01 | 0.03  | 9.31E-01 | 9.90E-01 |

|                    |       |          |          |       |          |          |
|--------------------|-------|----------|----------|-------|----------|----------|
| <b>AC073284.1</b>  | 1.57  | 4.27E-01 | 1.00E+00 | -0.08 | 9.31E-01 | 9.90E-01 |
| <b>PSMC2</b>       | 0.01  | 9.65E-01 | 1.00E+00 | 0.02  | 9.31E-01 | 9.90E-01 |
| <b>RIPK4</b>       | -0.33 | 1.58E-01 | 1.00E+00 | 0.05  | 9.31E-01 | 9.90E-01 |
| <b>XLOC_003615</b> | -1.53 | 1.27E-01 | 1.00E+00 | 0.07  | 9.31E-01 | 9.90E-01 |
| <b>MED19</b>       | 0.08  | 7.15E-01 | 1.00E+00 | 0.03  | 9.31E-01 | 9.90E-01 |
| <b>SIK3</b>        | -0.05 | 8.31E-01 | 1.00E+00 | 0.05  | 9.31E-01 | 9.90E-01 |
| <b>XLOC_010704</b> | -1.81 | 3.45E-01 | 1.00E+00 | 0.11  | 9.31E-01 | 9.90E-01 |
| <b>MIEF1</b>       | 0.12  | 5.87E-01 | 1.00E+00 | 0.02  | 9.31E-01 | 9.90E-01 |
| <b>GTF3C1</b>      | -0.14 | 5.95E-01 | 1.00E+00 | 0.03  | 9.31E-01 | 9.90E-01 |
| <b>AP001922.3</b>  | 1.27  | 5.01E-01 | 1.00E+00 | -0.12 | 9.31E-01 | 9.90E-01 |
| <b>FMOD</b>        | 0.54  | 2.45E-01 | 1.00E+00 | 0.04  | 9.31E-01 | 9.90E-01 |
| <b>DCLK3</b>       | -0.31 | 4.46E-01 | 1.00E+00 | 0.09  | 9.31E-01 | 9.90E-01 |
| <b>THAP5</b>       | -0.05 | 8.51E-01 | 1.00E+00 | -0.04 | 9.31E-01 | 9.90E-01 |
| <b>XLOC_002888</b> | -1.09 | 2.63E-01 | 1.00E+00 | -0.09 | 9.31E-01 | 9.90E-01 |
| <b>LINC01873</b>   | -1.52 | 3.71E-01 | 1.00E+00 | -0.09 | 9.31E-01 | 9.90E-01 |
| <b>TPT1P9</b>      | -1.40 | 6.84E-01 | 1.00E+00 | 0.07  | 9.31E-01 | 9.90E-01 |
| <b>CD151</b>       | 0.27  | 5.28E-01 | 1.00E+00 | -0.03 | 9.31E-01 | 9.90E-01 |
| <b>ZCCHC24</b>     | 0.50  | 3.30E-01 | 1.00E+00 | 0.05  | 9.31E-01 | 9.90E-01 |
| <b>TPPP2</b>       | 0.55  | 7.47E-01 | 1.00E+00 | 0.16  | 9.31E-01 | 9.90E-01 |
| <b>BABAM2</b>      | -0.31 | 1.66E-01 | 1.00E+00 | 0.01  | 9.31E-01 | 9.90E-01 |
| <b>RNA5SP151</b>   | 1.50  | 6.61E-01 | 1.00E+00 | -0.27 | 9.32E-01 | 9.90E-01 |
| <b>OR2A7</b>       | -0.57 | 3.13E-01 | 1.00E+00 | 0.05  | 9.32E-01 | 9.90E-01 |
| <b>EML4</b>        | -0.16 | 5.94E-01 | 1.00E+00 | 0.02  | 9.32E-01 | 9.90E-01 |
| <b>CDH1</b>        | -0.13 | 6.63E-01 | 1.00E+00 | 0.04  | 9.32E-01 | 9.90E-01 |
| <b>TMEM134</b>     | -0.12 | 7.22E-01 | 1.00E+00 | -0.04 | 9.32E-01 | 9.90E-01 |
| <b>ZDHHC1</b>      | -0.12 | 6.25E-01 | 1.00E+00 | -0.07 | 9.32E-01 | 9.90E-01 |
| <b>ZNF526</b>      | 0.00  | 9.86E-01 | 1.00E+00 | 0.03  | 9.32E-01 | 9.90E-01 |
| <b>ARHGAP11A</b>   | 0.20  | 5.18E-01 | 1.00E+00 | 0.04  | 9.32E-01 | 9.90E-01 |
| <b>HES7</b>        | -0.53 | 6.51E-01 | 1.00E+00 | -0.10 | 9.32E-01 | 9.90E-01 |
| <b>PLEKHA8P1</b>   | 0.41  | 5.21E-01 | 1.00E+00 | -0.05 | 9.32E-01 | 9.90E-01 |
| <b>PC</b>          | 0.98  | 1.82E-01 | 1.00E+00 | -0.06 | 9.32E-01 | 9.90E-01 |
| <b>RNF31</b>       | -0.29 | 2.74E-01 | 1.00E+00 | 0.06  | 9.32E-01 | 9.90E-01 |

|                    |       |          |          |       |          |          |
|--------------------|-------|----------|----------|-------|----------|----------|
| <b>PKD2L2</b>      | -3.76 | 2.83E-02 | 9.75E-01 | -0.09 | 9.32E-01 | 9.90E-01 |
| <b>CIZ1</b>        | -0.26 | 3.59E-01 | 1.00E+00 | 0.03  | 9.32E-01 | 9.90E-01 |
| <b>TBC1D17</b>     | -0.21 | 3.78E-01 | 1.00E+00 | 0.03  | 9.32E-01 | 9.90E-01 |
| <b>DSG1</b>        | 0.08  | 8.72E-01 | 1.00E+00 | 0.05  | 9.32E-01 | 9.90E-01 |
| <b>FOXK1</b>       | 0.24  | 5.82E-01 | 1.00E+00 | 0.03  | 9.32E-01 | 9.90E-01 |
| <b>JAKMIP3</b>     | -0.28 | 6.64E-01 | 1.00E+00 | -0.08 | 9.32E-01 | 9.90E-01 |
| <b>CDC14B</b>      | 0.25  | 4.72E-01 | 1.00E+00 | 0.03  | 9.32E-01 | 9.90E-01 |
| <b>C9orf84</b>     | -0.51 | 6.47E-01 | 1.00E+00 | -0.08 | 9.32E-01 | 9.90E-01 |
| <b>XLOC_000105</b> | -0.28 | 6.47E-01 | 1.00E+00 | 0.27  | 9.32E-01 | 9.90E-01 |
| <b>MYLIP</b>       | 0.12  | 6.30E-01 | 1.00E+00 | 0.04  | 9.32E-01 | 9.90E-01 |
| <b>AC005532.1</b>  | 0.50  | 7.12E-01 | 1.00E+00 | 0.08  | 9.32E-01 | 9.90E-01 |
| <b>C2CD4D</b>      | 0.03  | 9.51E-01 | 1.00E+00 | 0.07  | 9.32E-01 | 9.90E-01 |
| <b>PKNOX1</b>      | -0.14 | 3.62E-01 | 1.00E+00 | -0.02 | 9.32E-01 | 9.90E-01 |
| <b>AF127577.2</b>  | -1.33 | 6.98E-01 | 1.00E+00 | -0.09 | 9.32E-01 | 9.90E-01 |
| <b>LIMS2</b>       | 0.05  | 9.17E-01 | 1.00E+00 | -0.04 | 9.32E-01 | 9.90E-01 |
| <b>MRAS</b>        | 1.09  | 1.69E-01 | 1.00E+00 | -0.05 | 9.33E-01 | 9.90E-01 |
| <b>FKBP2</b>       | -0.02 | 9.20E-01 | 1.00E+00 | -0.01 | 9.33E-01 | 9.90E-01 |
| <b>NFRKB</b>       | -0.21 | 4.08E-01 | 1.00E+00 | -0.03 | 9.33E-01 | 9.90E-01 |
| <b>STOML2</b>      | -0.09 | 6.23E-01 | 1.00E+00 | 0.01  | 9.33E-01 | 9.90E-01 |
| <b>TMPRSS11F</b>   | 0.72  | 4.40E-01 | 1.00E+00 | 0.07  | 9.33E-01 | 9.90E-01 |
| <b>AC097382.2</b>  | 3.41  | 2.30E-01 | 1.00E+00 | 0.10  | 9.33E-01 | 9.90E-01 |
| <b>BAIAP2L2</b>    | -0.93 | 5.31E-02 | 1.00E+00 | 0.04  | 9.33E-01 | 9.90E-01 |
| <b>SLC8A1-AS1</b>  | -0.61 | 7.46E-01 | 1.00E+00 | 0.06  | 9.33E-01 | 9.90E-01 |
| <b>MARCO</b>       | 0.20  | 7.82E-01 | 1.00E+00 | 0.25  | 9.33E-01 | 9.90E-01 |
| <b>ZPLD1</b>       | 1.36  | 6.21E-01 | 1.00E+00 | -0.12 | 9.33E-01 | 9.90E-01 |
| <b>AC037459.3</b>  | -0.25 | 7.77E-01 | 1.00E+00 | -0.08 | 9.33E-01 | 9.90E-01 |
| <b>PIM3</b>        | -0.59 | 1.48E-01 | 1.00E+00 | -0.04 | 9.33E-01 | 9.90E-01 |
| <b>POLR1E</b>      | 0.08  | 7.02E-01 | 1.00E+00 | -0.02 | 9.33E-01 | 9.90E-01 |
| <b>AC018529.3</b>  | -1.26 | 7.16E-01 | 1.00E+00 | 0.11  | 9.33E-01 | 9.90E-01 |
| <b>ALAS1</b>       | 0.03  | 8.97E-01 | 1.00E+00 | 0.02  | 9.33E-01 | 9.90E-01 |
| <b>GOLGA8B</b>     | -0.62 | 3.83E-01 | 1.00E+00 | 0.05  | 9.33E-01 | 9.90E-01 |
| <b>AC007014.2</b>  | 0.95  | 6.08E-01 | 1.00E+00 | 0.06  | 9.33E-01 | 9.90E-01 |

|                   |        |          |          |       |          |          |
|-------------------|--------|----------|----------|-------|----------|----------|
| <b>AC107918.4</b> | -0.01  | 9.94E-01 | 1.00E+00 | 0.05  | 9.33E-01 | 9.90E-01 |
| <b>AC015921.1</b> | -2.35  | 1.13E-01 | 1.00E+00 | -0.11 | 9.33E-01 | 9.90E-01 |
| <b>AL603910.1</b> | -1.03  | 4.19E-01 | 1.00E+00 | 0.07  | 9.33E-01 | 9.90E-01 |
| <b>AP001282.2</b> | -1.73  | 5.80E-01 | 1.00E+00 | -0.05 | 9.33E-01 | 9.90E-01 |
| <b>AC007786.1</b> | -0.94  | 5.58E-01 | 1.00E+00 | -0.08 | 9.34E-01 | 9.90E-01 |
| <b>AC073585.1</b> | -0.44  | 7.76E-01 | 1.00E+00 | 0.12  | 9.34E-01 | 9.90E-01 |
| <b>AC069544.1</b> | -0.08  | 9.10E-01 | 1.00E+00 | 0.04  | 9.34E-01 | 9.90E-01 |
| <b>OSBPL11</b>    | 0.04   | 8.73E-01 | 1.00E+00 | -0.03 | 9.34E-01 | 9.90E-01 |
| <b>RALY</b>       | -0.16  | 3.93E-01 | 1.00E+00 | 0.03  | 9.34E-01 | 9.90E-01 |
| <b>ANKRD6</b>     | -0.43  | 2.86E-01 | 1.00E+00 | -0.05 | 9.34E-01 | 9.90E-01 |
| <b>MAD1L1</b>     | -0.32  | 1.74E-01 | 1.00E+00 | 0.01  | 9.34E-01 | 9.90E-01 |
| <b>KRTAP10-9</b>  | -12.88 | 1.76E-04 | 4.07E-02 | -0.27 | 9.34E-01 | 9.90E-01 |
| <b>AP001992.1</b> | 1.05   | 4.87E-01 | 1.00E+00 | -0.11 | 9.34E-01 | 9.90E-01 |
| <b>AC068831.7</b> | -0.65  | 6.31E-01 | 1.00E+00 | -0.21 | 9.34E-01 | 9.90E-01 |
| <b>AL137009.1</b> | 0.54   | 6.97E-01 | 1.00E+00 | -0.07 | 9.34E-01 | 9.90E-01 |
| <b>OXSM</b>       | -0.02  | 9.38E-01 | 1.00E+00 | 0.02  | 9.34E-01 | 9.90E-01 |
| <b>AL161891.1</b> | 0.60   | 3.30E-01 | 1.00E+00 | 0.06  | 9.34E-01 | 9.90E-01 |
| <b>C1orf123</b>   | -0.01  | 9.59E-01 | 1.00E+00 | -0.02 | 9.34E-01 | 9.90E-01 |
| <b>ALOX12P2</b>   | -2.02  | 1.31E-01 | 1.00E+00 | 0.08  | 9.34E-01 | 9.90E-01 |
| <b>LINC00540</b>  | -0.19  | 9.14E-01 | 1.00E+00 | 0.10  | 9.34E-01 | 9.90E-01 |
| <b>PPP1R3B</b>    | 0.18   | 5.42E-01 | 1.00E+00 | -0.03 | 9.34E-01 | 9.90E-01 |
| <b>LRRC37A16P</b> | 0.33   | 4.30E-01 | 1.00E+00 | -0.02 | 9.34E-01 | 9.90E-01 |
| <b>TARDBP</b>     | 0.12   | 5.76E-01 | 1.00E+00 | 0.02  | 9.34E-01 | 9.90E-01 |
| <b>AC003973.3</b> | 1.15   | 4.16E-01 | 1.00E+00 | 0.09  | 9.34E-01 | 9.90E-01 |
| <b>ITPRIPL1</b>   | 0.57   | 3.23E-01 | 1.00E+00 | 0.05  | 9.35E-01 | 9.90E-01 |
| <b>FIGNL1</b>     | 0.10   | 6.91E-01 | 1.00E+00 | -0.04 | 9.35E-01 | 9.90E-01 |
| <b>RPSAP15</b>    | -0.01  | 9.81E-01 | 1.00E+00 | 0.03  | 9.35E-01 | 9.90E-01 |
| <b>MMEL1</b>      | 0.75   | 4.47E-01 | 1.00E+00 | 0.07  | 9.35E-01 | 9.90E-01 |
| <b>NTRK2</b>      | 0.39   | 4.14E-01 | 1.00E+00 | -0.04 | 9.35E-01 | 9.90E-01 |
| <b>TMEM33</b>     | 0.17   | 4.64E-01 | 1.00E+00 | -0.03 | 9.35E-01 | 9.90E-01 |
| <b>KCTD17</b>     | 0.01   | 9.87E-01 | 1.00E+00 | -0.05 | 9.35E-01 | 9.90E-01 |
| <b>LEF1-AS1</b>   | -2.26  | 1.09E-01 | 1.00E+00 | -0.07 | 9.35E-01 | 9.90E-01 |



|            |       |          |          |       |          |          |
|------------|-------|----------|----------|-------|----------|----------|
| USP3       | -0.07 | 7.43E-01 | 1.00E+00 | -0.02 | 9.35E-01 | 9.90E-01 |
| RWDD3      | 0.41  | 6.06E-01 | 1.00E+00 | -0.05 | 9.35E-01 | 9.90E-01 |
| GTSF1      | -3.32 | 8.83E-02 | 1.00E+00 | -0.06 | 9.35E-01 | 9.90E-01 |
| DENND2C    | 0.24  | 5.73E-01 | 1.00E+00 | 0.03  | 9.35E-01 | 9.90E-01 |
| POLD2      | -0.17 | 4.02E-01 | 1.00E+00 | -0.02 | 9.35E-01 | 9.90E-01 |
| HSPBP1     | -0.27 | 3.06E-01 | 1.00E+00 | 0.02  | 9.35E-01 | 9.90E-01 |
| RASD2      | -0.20 | 7.43E-01 | 1.00E+00 | -0.05 | 9.35E-01 | 9.90E-01 |
| EVC2       | 0.26  | 3.90E-01 | 1.00E+00 | 0.05  | 9.35E-01 | 9.90E-01 |
| SMC5-AS1   | -1.76 | 9.49E-02 | 1.00E+00 | -0.05 | 9.35E-01 | 9.90E-01 |
| CAMSAP2    | -0.04 | 8.91E-01 | 1.00E+00 | 0.03  | 9.35E-01 | 9.90E-01 |
| ALKBH4     | 0.06  | 7.62E-01 | 1.00E+00 | 0.03  | 9.35E-01 | 9.90E-01 |
| E2F1       | -0.09 | 7.08E-01 | 1.00E+00 | 0.06  | 9.35E-01 | 9.90E-01 |
| AL078590.3 | -1.05 | 1.14E-01 | 1.00E+00 | -0.05 | 9.35E-01 | 9.90E-01 |
| TCEAL4     | 0.03  | 8.78E-01 | 1.00E+00 | -0.02 | 9.36E-01 | 9.90E-01 |
| STK17A     | 0.00  | 9.96E-01 | 1.00E+00 | -0.05 | 9.36E-01 | 9.90E-01 |
| ZMYND10    | 0.18  | 7.88E-01 | 1.00E+00 | -0.06 | 9.36E-01 | 9.90E-01 |
| SREK1IP1   | 0.26  | 3.58E-01 | 1.00E+00 | 0.02  | 9.36E-01 | 9.90E-01 |
| GALM       | 0.12  | 7.42E-01 | 1.00E+00 | -0.03 | 9.36E-01 | 9.90E-01 |
| PHACTR4    | -0.19 | 5.73E-01 | 1.00E+00 | 0.02  | 9.36E-01 | 9.90E-01 |
| AC103718.1 | 0.09  | 9.13E-01 | 1.00E+00 | -0.07 | 9.36E-01 | 9.90E-01 |
| SH2D4A     | 0.14  | 6.69E-01 | 1.00E+00 | 0.02  | 9.36E-01 | 9.90E-01 |
| CCDC138    | 0.06  | 8.59E-01 | 1.00E+00 | 0.04  | 9.36E-01 | 9.90E-01 |
| TPRN       | -0.08 | 8.32E-01 | 1.00E+00 | -0.03 | 9.36E-01 | 9.90E-01 |
| FYN        | 0.09  | 7.47E-01 | 1.00E+00 | -0.04 | 9.36E-01 | 9.90E-01 |
| AC023790.2 | 0.18  | 8.93E-01 | 1.00E+00 | 0.08  | 9.36E-01 | 9.90E-01 |
| PI4KA      | -0.39 | 5.49E-02 | 1.00E+00 | 0.04  | 9.36E-01 | 9.90E-01 |
| BMPER      | -0.13 | 8.64E-01 | 1.00E+00 | 0.16  | 9.36E-01 | 9.90E-01 |
| TUBBP5     | -0.51 | 6.05E-01 | 1.00E+00 | -0.06 | 9.36E-01 | 9.90E-01 |
| IMPG2      | -1.98 | 2.44E-01 | 1.00E+00 | -0.13 | 9.36E-01 | 9.90E-01 |
| FBXO42     | 0.12  | 5.67E-01 | 1.00E+00 | -0.02 | 9.36E-01 | 9.91E-01 |
| KRT73      | -2.55 | 4.24E-01 | 1.00E+00 | 0.10  | 9.37E-01 | 9.91E-01 |
| F2R        | 0.14  | 6.17E-01 | 1.00E+00 | -0.02 | 9.37E-01 | 9.91E-01 |

|                   |       |          |          |       |          |          |
|-------------------|-------|----------|----------|-------|----------|----------|
| <b>AP003031.1</b> | 0.55  | 3.47E-01 | 1.00E+00 | 0.04  | 9.37E-01 | 9.91E-01 |
| <b>WSCD1</b>      | 0.32  | 4.06E-01 | 1.00E+00 | 0.06  | 9.37E-01 | 9.91E-01 |
| <b>COBL</b>       | 0.03  | 8.98E-01 | 1.00E+00 | -0.04 | 9.37E-01 | 9.91E-01 |
| <b>SLC17A5</b>    | 0.05  | 8.53E-01 | 1.00E+00 | 0.02  | 9.37E-01 | 9.91E-01 |
| <b>KANK3</b>      | 0.53  | 3.45E-01 | 1.00E+00 | -0.06 | 9.37E-01 | 9.91E-01 |
| <b>STARD7-AS1</b> | -0.02 | 9.53E-01 | 1.00E+00 | 0.04  | 9.37E-01 | 9.91E-01 |
| <b>DIAPH1</b>     | -0.06 | 7.99E-01 | 1.00E+00 | 0.03  | 9.37E-01 | 9.91E-01 |
| <b>TCF4</b>       | 0.26  | 3.83E-01 | 1.00E+00 | -0.02 | 9.37E-01 | 9.91E-01 |
| <b>SLC4A11</b>    | -0.25 | 6.35E-01 | 1.00E+00 | 0.05  | 9.37E-01 | 9.91E-01 |
| <b>AC084824.4</b> | -3.44 | 5.68E-02 | 1.00E+00 | 0.09  | 9.37E-01 | 9.91E-01 |
| <b>TTY15</b>      | -0.91 | 2.83E-01 | 1.00E+00 | 0.12  | 9.37E-01 | 9.91E-01 |
| <b>SIRT3</b>      | -0.01 | 9.63E-01 | 1.00E+00 | -0.01 | 9.37E-01 | 9.91E-01 |
| <b>EIF4BP6</b>    | -0.03 | 9.61E-01 | 1.00E+00 | 0.02  | 9.37E-01 | 9.91E-01 |
| <b>AC005899.6</b> | -0.09 | 9.41E-01 | 1.00E+00 | 0.07  | 9.37E-01 | 9.91E-01 |
| <b>C19orf70</b>   | -0.18 | 2.65E-01 | 1.00E+00 | -0.02 | 9.37E-01 | 9.91E-01 |
| <b>KAT8</b>       | -0.15 | 3.28E-01 | 1.00E+00 | -0.04 | 9.38E-01 | 9.91E-01 |
| <b>CRB2</b>       | -1.00 | 2.14E-01 | 1.00E+00 | -0.25 | 9.38E-01 | 9.91E-01 |
| <b>AC120114.1</b> | -1.88 | 1.19E-01 | 1.00E+00 | -0.07 | 9.38E-01 | 9.91E-01 |
| <b>COL6A6</b>     | -0.09 | 9.04E-01 | 1.00E+00 | -0.25 | 9.38E-01 | 9.91E-01 |
| <b>RPS15AP11</b>  | -0.33 | 8.60E-01 | 1.00E+00 | 0.05  | 9.38E-01 | 9.91E-01 |
| <b>HHIPL1</b>     | -0.12 | 7.60E-01 | 1.00E+00 | 0.23  | 9.38E-01 | 9.91E-01 |
| <b>CYB561D1</b>   | 0.52  | 1.79E-01 | 1.00E+00 | -0.02 | 9.38E-01 | 9.91E-01 |
| <b>ATAD3A</b>     | -0.67 | 3.42E-02 | 1.00E+00 | -0.04 | 9.38E-01 | 9.91E-01 |
| <b>DTL</b>        | -0.44 | 2.06E-01 | 1.00E+00 | -0.02 | 9.38E-01 | 9.91E-01 |
| <b>BX537318.1</b> | -0.28 | 6.69E-01 | 1.00E+00 | -0.04 | 9.38E-01 | 9.91E-01 |
| <b>MRGBP</b>      | -0.18 | 4.70E-01 | 1.00E+00 | 0.05  | 9.38E-01 | 9.91E-01 |
| <b>FGD5P1</b>     | -0.62 | 3.60E-01 | 1.00E+00 | -0.11 | 9.38E-01 | 9.91E-01 |
| <b>LCN12</b>      | -4.16 | 5.13E-02 | 1.00E+00 | 0.12  | 9.38E-01 | 9.91E-01 |
| <b>ABHD17A</b>    | -0.09 | 7.63E-01 | 1.00E+00 | -0.08 | 9.38E-01 | 9.91E-01 |
| <b>RPS13P2</b>    | -1.40 | 1.61E-01 | 1.00E+00 | -0.06 | 9.38E-01 | 9.91E-01 |
| <b>AL450384.2</b> | -1.69 | 1.43E-01 | 1.00E+00 | 0.05  | 9.38E-01 | 9.91E-01 |
| <b>PCDH19</b>     | 0.24  | 5.78E-01 | 1.00E+00 | -0.06 | 9.38E-01 | 9.91E-01 |

|                   |       |          |          |       |          |          |
|-------------------|-------|----------|----------|-------|----------|----------|
| <b>AC009053.1</b> | 0.09  | 8.50E-01 | 1.00E+00 | 0.04  | 9.38E-01 | 9.91E-01 |
| <b>G37033</b>     | -3.42 | 6.14E-02 | 1.00E+00 | 0.09  | 9.38E-01 | 9.91E-01 |
| <b>AC005225.4</b> | 0.38  | 5.85E-01 | 1.00E+00 | -0.06 | 9.38E-01 | 9.91E-01 |
| <b>MST1P2</b>     | -0.19 | 7.60E-01 | 1.00E+00 | -0.06 | 9.38E-01 | 9.91E-01 |
| <b>AC245060.5</b> | 0.80  | 3.05E-01 | 1.00E+00 | 0.05  | 9.38E-01 | 9.91E-01 |
| <b>LEMD3</b>      | 0.00  | 9.89E-01 | 1.00E+00 | -0.03 | 9.39E-01 | 9.91E-01 |
| <b>GRAMD4</b>     | -0.05 | 7.99E-01 | 1.00E+00 | -0.03 | 9.39E-01 | 9.91E-01 |
| <b>FAM83G</b>     | -0.28 | 5.40E-01 | 1.00E+00 | 0.05  | 9.39E-01 | 9.91E-01 |
| <b>PAPPA2</b>     | 0.27  | 8.07E-01 | 1.00E+00 | 0.07  | 9.39E-01 | 9.91E-01 |
| <b>SEC63</b>      | 0.04  | 7.82E-01 | 1.00E+00 | 0.01  | 9.39E-01 | 9.91E-01 |
| <b>AC092902.2</b> | 0.75  | 2.60E-01 | 1.00E+00 | 0.04  | 9.39E-01 | 9.91E-01 |
| <b>HIST1H3E</b>   | 0.73  | 2.82E-01 | 1.00E+00 | 0.06  | 9.39E-01 | 9.91E-01 |
| <b>AL391058.1</b> | 0.55  | 6.71E-01 | 1.00E+00 | -0.04 | 9.39E-01 | 9.91E-01 |
| <b>UBQLNL</b>     | 0.41  | 7.86E-01 | 1.00E+00 | -0.13 | 9.39E-01 | 9.91E-01 |
| <b>TRAM1</b>      | 0.18  | 3.79E-01 | 1.00E+00 | 0.02  | 9.39E-01 | 9.91E-01 |
| <b>CAST</b>       | 0.06  | 7.07E-01 | 1.00E+00 | 0.01  | 9.39E-01 | 9.91E-01 |
| <b>AL354761.1</b> | 0.34  | 6.76E-01 | 1.00E+00 | -0.07 | 9.39E-01 | 9.91E-01 |
| <b>AGK</b>        | -0.22 | 3.03E-01 | 1.00E+00 | -0.01 | 9.39E-01 | 9.91E-01 |
| <b>UBE2Q1</b>     | 0.07  | 7.44E-01 | 1.00E+00 | -0.03 | 9.39E-01 | 9.91E-01 |
| <b>USE1</b>       | -0.02 | 8.90E-01 | 1.00E+00 | 0.02  | 9.39E-01 | 9.91E-01 |
| <b>BRD1</b>       | -0.22 | 4.86E-01 | 1.00E+00 | 0.03  | 9.39E-01 | 9.91E-01 |
| <b>AL133367.1</b> | 0.26  | 6.21E-01 | 1.00E+00 | -0.06 | 9.39E-01 | 9.91E-01 |
| <b>RNF123</b>     | -0.15 | 4.32E-01 | 1.00E+00 | 0.04  | 9.39E-01 | 9.91E-01 |
| <b>AL158152.2</b> | 1.08  | 3.46E-01 | 1.00E+00 | -0.05 | 9.39E-01 | 9.91E-01 |
| <b>ZFH4-AS1</b>   | -1.85 | 4.89E-01 | 1.00E+00 | 0.24  | 9.39E-01 | 9.91E-01 |
| <b>RCC1L</b>      | 0.26  | 2.58E-01 | 1.00E+00 | -0.05 | 9.39E-01 | 9.91E-01 |
| <b>NYNRIN</b>     | -0.23 | 4.33E-01 | 1.00E+00 | 0.04  | 9.39E-01 | 9.91E-01 |
| <b>PID1</b>       | 0.75  | 2.11E-02 | 8.94E-01 | 0.03  | 9.39E-01 | 9.91E-01 |
| <b>SAMD1</b>      | -0.22 | 3.61E-01 | 1.00E+00 | -0.04 | 9.39E-01 | 9.91E-01 |
| <b>AKAP7</b>      | 0.41  | 1.51E-01 | 1.00E+00 | -0.04 | 9.39E-01 | 9.91E-01 |
| <b>CCAR2</b>      | -0.10 | 6.13E-01 | 1.00E+00 | -0.03 | 9.39E-01 | 9.91E-01 |
| <b>GALNT17</b>    | -0.21 | 7.55E-01 | 1.00E+00 | -0.17 | 9.40E-01 | 9.91E-01 |

|                     |       |          |          |       |          |          |
|---------------------|-------|----------|----------|-------|----------|----------|
| <b>AC015813.6</b>   | 0.68  | 9.23E-02 | 1.00E+00 | -0.04 | 9.40E-01 | 9.91E-01 |
| <b>SLC6A9</b>       | -0.03 | 9.46E-01 | 1.00E+00 | 0.03  | 9.40E-01 | 9.91E-01 |
| <b>AC112907.3</b>   | 0.56  | 5.80E-01 | 1.00E+00 | -0.08 | 9.40E-01 | 9.91E-01 |
| <b>ARMCX1</b>       | 0.30  | 3.17E-01 | 1.00E+00 | -0.02 | 9.40E-01 | 9.91E-01 |
| <b>PLRG1</b>        | 0.04  | 8.12E-01 | 1.00E+00 | 0.01  | 9.40E-01 | 9.91E-01 |
| <b>PROSER1</b>      | -0.16 | 5.26E-01 | 1.00E+00 | -0.02 | 9.40E-01 | 9.91E-01 |
| <b>TBC1D5</b>       | -0.02 | 9.40E-01 | 1.00E+00 | 0.02  | 9.40E-01 | 9.91E-01 |
| <b>AC091163.1</b>   | -0.32 | 8.21E-01 | 1.00E+00 | -0.11 | 9.40E-01 | 9.91E-01 |
| <b>GPS1</b>         | -0.27 | 1.57E-01 | 1.00E+00 | -0.01 | 9.40E-01 | 9.91E-01 |
| <b>XLOC_006168</b>  | -0.91 | 2.51E-01 | 1.00E+00 | 0.07  | 9.40E-01 | 9.91E-01 |
| <b>AL357054.2</b>   | -3.59 | 1.63E-01 | 1.00E+00 | 0.07  | 9.40E-01 | 9.91E-01 |
| <b>C16orf72</b>     | 0.03  | 8.74E-01 | 1.00E+00 | -0.03 | 9.40E-01 | 9.91E-01 |
| <b>CHIC2</b>        | 0.00  | 9.97E-01 | 1.00E+00 | -0.02 | 9.40E-01 | 9.91E-01 |
| <b>AC123768.3</b>   | -0.75 | 7.99E-01 | 1.00E+00 | -0.05 | 9.40E-01 | 9.91E-01 |
| <b>MYO5B</b>        | -0.47 | 3.00E-01 | 1.00E+00 | 0.04  | 9.40E-01 | 9.91E-01 |
| <b>ZFP64</b>        | -0.14 | 6.13E-01 | 1.00E+00 | -0.02 | 9.40E-01 | 9.91E-01 |
| <b>SHF</b>          | -0.24 | 4.59E-01 | 1.00E+00 | 0.05  | 9.40E-01 | 9.91E-01 |
| <b>AC099518.6</b>   | 0.11  | 8.66E-01 | 1.00E+00 | 0.06  | 9.40E-01 | 9.91E-01 |
| <b>ESRRA</b>        | -0.19 | 4.70E-01 | 1.00E+00 | 0.05  | 9.40E-01 | 9.91E-01 |
| <b>TRMT112</b>      | 0.05  | 7.42E-01 | 1.00E+00 | -0.02 | 9.40E-01 | 9.91E-01 |
| <b>CAPN14</b>       | -0.83 | 2.87E-01 | 1.00E+00 | 0.08  | 9.40E-01 | 9.91E-01 |
| <b>SNRPA</b>        | -0.10 | 6.46E-01 | 1.00E+00 | 0.01  | 9.41E-01 | 9.91E-01 |
| <b>C8orf58</b>      | -0.01 | 9.83E-01 | 1.00E+00 | -0.03 | 9.41E-01 | 9.91E-01 |
| <b>ARL17A</b>       | -0.03 | 9.77E-01 | 1.00E+00 | -0.04 | 9.41E-01 | 9.91E-01 |
| <b>MAPT</b>         | -0.15 | 6.46E-01 | 1.00E+00 | 0.03  | 9.41E-01 | 9.91E-01 |
| <b>DOCK9</b>        | 0.00  | 9.94E-01 | 1.00E+00 | 0.02  | 9.41E-01 | 9.91E-01 |
| <b>MSANTD3</b>      | -0.16 | 5.06E-01 | 1.00E+00 | -0.02 | 9.41E-01 | 9.91E-01 |
| <b>PIGQ</b>         | -0.07 | 7.73E-01 | 1.00E+00 | 0.03  | 9.41E-01 | 9.91E-01 |
| <b>AC022916.1</b>   | 0.01  | 9.90E-01 | 1.00E+00 | 0.02  | 9.41E-01 | 9.91E-01 |
| <b>AL031429.2</b>   | 1.08  | 3.52E-01 | 1.00E+00 | -0.06 | 9.41E-01 | 9.91E-01 |
| <b>RP11-353N4.8</b> | -1.16 | 7.39E-01 | 1.00E+00 | 0.07  | 9.41E-01 | 9.91E-01 |
| <b>SIX1</b>         | 3.95  | 2.75E-02 | 9.69E-01 | -0.06 | 9.41E-01 | 9.91E-01 |

|                    |       |          |          |       |          |          |
|--------------------|-------|----------|----------|-------|----------|----------|
| <b>BCAS3</b>       | -0.35 | 1.49E-01 | 1.00E+00 | -0.03 | 9.41E-01 | 9.91E-01 |
| <b>YWHAZP5</b>     | 0.14  | 9.67E-01 | 1.00E+00 | 0.05  | 9.41E-01 | 9.91E-01 |
| <b>AL162431.2</b>  | 0.00  | 9.98E-01 | 1.00E+00 | -0.07 | 9.41E-01 | 9.91E-01 |
| <b>G10803</b>      | -1.52 | 6.60E-01 | 1.00E+00 | 0.24  | 9.41E-01 | 9.91E-01 |
| <b>AL137782.1</b>  | -2.12 | 4.31E-01 | 1.00E+00 | 0.06  | 9.41E-01 | 9.91E-01 |
| <b>ALAD</b>        | 0.08  | 7.57E-01 | 1.00E+00 | -0.02 | 9.41E-01 | 9.91E-01 |
| <b>LINC01415</b>   | -0.31 | 5.57E-01 | 1.00E+00 | 0.05  | 9.41E-01 | 9.91E-01 |
| <b>GFI1B</b>       | -0.12 | 9.27E-01 | 1.00E+00 | -0.06 | 9.41E-01 | 9.91E-01 |
| <b>R3HDM4</b>      | -0.42 | 1.07E-01 | 1.00E+00 | -0.05 | 9.41E-01 | 9.91E-01 |
| <b>CENPN</b>       | -0.42 | 2.66E-01 | 1.00E+00 | 0.02  | 9.41E-01 | 9.91E-01 |
| <b>SNRPC</b>       | -0.10 | 6.11E-01 | 1.00E+00 | -0.02 | 9.41E-01 | 9.91E-01 |
| <b>CFD</b>         | 1.05  | 2.70E-02 | 9.59E-01 | -0.04 | 9.42E-01 | 9.91E-01 |
| <b>DUSP26</b>      | -3.41 | 2.10E-03 | 2.39E-01 | -0.10 | 9.42E-01 | 9.91E-01 |
| <b>AP000808.1</b>  | -0.03 | 9.50E-01 | 1.00E+00 | -0.08 | 9.42E-01 | 9.91E-01 |
| <b>C9orf85</b>     | 0.05  | 8.25E-01 | 1.00E+00 | 0.02  | 9.42E-01 | 9.91E-01 |
| <b>GPC6</b>        | 0.88  | 2.55E-01 | 1.00E+00 | -0.04 | 9.42E-01 | 9.91E-01 |
| <b>TFPI</b>        | 0.77  | 3.70E-02 | 1.00E+00 | -0.03 | 9.42E-01 | 9.91E-01 |
| <b>G35948</b>      | 0.81  | 4.92E-01 | 1.00E+00 | 0.06  | 9.42E-01 | 9.91E-01 |
| <b>SLC5A5</b>      | -3.74 | 7.98E-02 | 1.00E+00 | 0.23  | 9.42E-01 | 9.91E-01 |
| <b>PIN1</b>        | -0.13 | 5.72E-01 | 1.00E+00 | -0.02 | 9.42E-01 | 9.91E-01 |
| <b>AC093583.1</b>  | 0.17  | 9.60E-01 | 1.00E+00 | -0.13 | 9.42E-01 | 9.91E-01 |
| <b>AP005018.2</b>  | -2.44 | 4.47E-01 | 1.00E+00 | -0.07 | 9.42E-01 | 9.91E-01 |
| <b>LDLRAD4-AS1</b> | -1.22 | 1.79E-01 | 1.00E+00 | 0.08  | 9.42E-01 | 9.91E-01 |
| <b>CYP2A6</b>      | 2.83  | 1.10E-01 | 1.00E+00 | 0.10  | 9.42E-01 | 9.91E-01 |
| <b>KRT3</b>        | -0.03 | 9.65E-01 | 1.00E+00 | -0.23 | 9.42E-01 | 9.91E-01 |
| <b>NR2F6</b>       | 0.14  | 5.37E-01 | 1.00E+00 | 0.04  | 9.42E-01 | 9.91E-01 |
| <b>DCUN1D3</b>     | 0.39  | 1.47E-01 | 1.00E+00 | -0.04 | 9.42E-01 | 9.91E-01 |
| <b>TNS2</b>        | 0.05  | 9.08E-01 | 1.00E+00 | 0.05  | 9.42E-01 | 9.91E-01 |
| <b>AC002075.2</b>  | 1.74  | 5.13E-01 | 1.00E+00 | 0.06  | 9.42E-01 | 9.91E-01 |
| <b>MBTD1</b>       | 0.24  | 3.15E-01 | 1.00E+00 | 0.03  | 9.42E-01 | 9.91E-01 |
| <b>GP6</b>         | 0.44  | 7.10E-01 | 1.00E+00 | 0.07  | 9.42E-01 | 9.91E-01 |
| <b>PARP2</b>       | -0.13 | 6.38E-01 | 1.00E+00 | -0.02 | 9.42E-01 | 9.91E-01 |

|            |       |          |          |       |          |          |
|------------|-------|----------|----------|-------|----------|----------|
| UQCRBP1    | -1.62 | 6.37E-01 | 1.00E+00 | 0.08  | 9.42E-01 | 9.91E-01 |
| C17orf99   | -1.07 | 3.13E-01 | 1.00E+00 | 0.06  | 9.43E-01 | 9.91E-01 |
| C21orf91   | -0.05 | 9.12E-01 | 1.00E+00 | 0.02  | 9.43E-01 | 9.91E-01 |
| MST1R      | -0.01 | 9.73E-01 | 1.00E+00 | -0.04 | 9.43E-01 | 9.91E-01 |
| LINC01508  | -2.49 | 1.57E-01 | 1.00E+00 | -0.09 | 9.43E-01 | 9.91E-01 |
| NUTM2D     | -0.13 | 8.52E-01 | 1.00E+00 | 0.22  | 9.43E-01 | 9.91E-01 |
| ACTA2      | -0.05 | 9.30E-01 | 1.00E+00 | 0.03  | 9.43E-01 | 9.91E-01 |
| LINC01353  | -0.27 | 8.68E-01 | 1.00E+00 | 0.07  | 9.43E-01 | 9.91E-01 |
| GSDMB      | -1.19 | 1.93E-01 | 1.00E+00 | 0.06  | 9.43E-01 | 9.91E-01 |
| AC104389.4 | 0.82  | 6.03E-01 | 1.00E+00 | 0.07  | 9.43E-01 | 9.91E-01 |
| SERPINA4   | -2.28 | 5.01E-01 | 1.00E+00 | 0.14  | 9.43E-01 | 9.91E-01 |
| FLJ12825   | -0.81 | 4.52E-01 | 1.00E+00 | 0.07  | 9.43E-01 | 9.91E-01 |
| HSPA5      | -0.66 | 8.96E-03 | 5.88E-01 | 0.02  | 9.43E-01 | 9.91E-01 |
| AC020912.1 | -0.79 | 5.75E-01 | 1.00E+00 | -0.11 | 9.43E-01 | 9.91E-01 |
| AP000240.1 | 0.68  | 3.56E-01 | 1.00E+00 | -0.06 | 9.43E-01 | 9.91E-01 |
| G2136      | 1.05  | 3.16E-01 | 1.00E+00 | 0.09  | 9.43E-01 | 9.91E-01 |
| AL136985.3 | -1.79 | 6.00E-01 | 1.00E+00 | -0.23 | 9.43E-01 | 9.91E-01 |
| RPL7AP11   | -0.10 | 9.59E-01 | 1.00E+00 | 0.04  | 9.43E-01 | 9.91E-01 |
| NR3C1      | 0.19  | 2.67E-01 | 1.00E+00 | -0.01 | 9.43E-01 | 9.91E-01 |
| CEACAM1    | -0.12 | 8.77E-01 | 1.00E+00 | -0.03 | 9.43E-01 | 9.91E-01 |
| COL17A1    | -0.12 | 6.65E-01 | 1.00E+00 | -0.04 | 9.43E-01 | 9.91E-01 |
| CADPS2     | 0.05  | 9.13E-01 | 1.00E+00 | 0.05  | 9.43E-01 | 9.91E-01 |
| ADTRP      | -0.32 | 5.25E-01 | 1.00E+00 | -0.04 | 9.43E-01 | 9.91E-01 |
| SSBP2      | 0.03  | 8.69E-01 | 1.00E+00 | -0.02 | 9.43E-01 | 9.91E-01 |
| F13A1      | 0.12  | 8.04E-01 | 1.00E+00 | 0.04  | 9.43E-01 | 9.91E-01 |
| VSIG10L2   | 0.32  | 5.64E-01 | 1.00E+00 | -0.06 | 9.43E-01 | 9.91E-01 |
| UCN2       | -1.49 | 1.17E-02 | 6.70E-01 | 0.06  | 9.43E-01 | 9.91E-01 |
| IQCK       | -0.60 | 1.80E-01 | 1.00E+00 | 0.02  | 9.43E-01 | 9.91E-01 |
| RPL12P10   | 0.46  | 6.65E-01 | 1.00E+00 | -0.12 | 9.44E-01 | 9.91E-01 |
| AC108866.1 | 0.89  | 5.89E-01 | 1.00E+00 | 0.06  | 9.44E-01 | 9.91E-01 |
| AC008781.2 | -0.03 | 9.92E-01 | 1.00E+00 | -0.09 | 9.44E-01 | 9.91E-01 |
| KRTAP29-1  | -3.45 | 3.00E-01 | 1.00E+00 | -0.23 | 9.44E-01 | 9.91E-01 |

|                   |       |          |          |       |          |          |
|-------------------|-------|----------|----------|-------|----------|----------|
| <b>PDPK1</b>      | 0.28  | 1.03E-01 | 1.00E+00 | 0.02  | 9.44E-01 | 9.91E-01 |
| <b>AC012467.2</b> | 0.74  | 2.02E-01 | 1.00E+00 | 0.05  | 9.44E-01 | 9.91E-01 |
| <b>MANF</b>       | -0.09 | 7.02E-01 | 1.00E+00 | 0.02  | 9.44E-01 | 9.91E-01 |
| <b>MYBPC1</b>     | 1.02  | 1.17E-01 | 1.00E+00 | -0.06 | 9.44E-01 | 9.91E-01 |
| <b>G8112</b>      | -1.05 | 1.81E-01 | 1.00E+00 | 0.04  | 9.44E-01 | 9.91E-01 |
| <b>LINC00649</b>  | -0.41 | 4.49E-01 | 1.00E+00 | -0.03 | 9.45E-01 | 9.92E-01 |
| <b>FTH1P20</b>    | -1.15 | 4.15E-01 | 1.00E+00 | -0.05 | 9.45E-01 | 9.92E-01 |
| <b>MCM3</b>       | -0.23 | 1.22E-01 | 1.00E+00 | 0.01  | 9.45E-01 | 9.92E-01 |
| <b>PRSS12</b>     | -0.07 | 8.05E-01 | 1.00E+00 | -0.04 | 9.45E-01 | 9.92E-01 |
| <b>KCTD5</b>      | 0.05  | 8.71E-01 | 1.00E+00 | -0.03 | 9.45E-01 | 9.92E-01 |
| <b>C3orf18</b>    | 0.07  | 8.95E-01 | 1.00E+00 | 0.03  | 9.45E-01 | 9.92E-01 |
| <b>POLG</b>       | 0.12  | 5.55E-01 | 1.00E+00 | 0.04  | 9.45E-01 | 9.92E-01 |
| <b>CHCHD5</b>     | -0.16 | 4.73E-01 | 1.00E+00 | 0.02  | 9.45E-01 | 9.92E-01 |
| <b>AP001542.1</b> | -0.96 | 3.11E-01 | 1.00E+00 | -0.07 | 9.45E-01 | 9.92E-01 |
| <b>AC093673.1</b> | -0.13 | 8.04E-01 | 1.00E+00 | 0.05  | 9.45E-01 | 9.92E-01 |
| <b>WDR5</b>       | 0.33  | 1.96E-01 | 1.00E+00 | 0.02  | 9.45E-01 | 9.92E-01 |
| <b>G40462</b>     | -1.78 | 1.11E-01 | 1.00E+00 | -0.16 | 9.45E-01 | 9.92E-01 |
| <b>PRR5</b>       | 0.51  | 2.00E-01 | 1.00E+00 | -0.04 | 9.45E-01 | 9.92E-01 |
| <b>LAIR2</b>      | -0.92 | 7.84E-01 | 1.00E+00 | 0.08  | 9.45E-01 | 9.92E-01 |
| <b>TUBA3D</b>     | -0.83 | 5.38E-01 | 1.00E+00 | -0.07 | 9.45E-01 | 9.92E-01 |
| <b>PPCDC</b>      | 0.09  | 7.85E-01 | 1.00E+00 | 0.01  | 9.45E-01 | 9.92E-01 |
| <b>ZNF786</b>     | -0.38 | 2.22E-01 | 1.00E+00 | 0.02  | 9.45E-01 | 9.92E-01 |
| <b>UGCG</b>       | 0.27  | 5.98E-01 | 1.00E+00 | 0.02  | 9.46E-01 | 9.92E-01 |
| <b>CRYBG1</b>     | 0.28  | 4.53E-01 | 1.00E+00 | 0.03  | 9.46E-01 | 9.92E-01 |
| <b>SNX19</b>      | 0.44  | 4.48E-02 | 1.00E+00 | 0.03  | 9.46E-01 | 9.92E-01 |
| <b>MARK3</b>      | -0.03 | 8.87E-01 | 1.00E+00 | 0.04  | 9.46E-01 | 9.92E-01 |
| <b>TNFRSF8</b>    | -0.65 | 3.19E-01 | 1.00E+00 | -0.05 | 9.46E-01 | 9.92E-01 |
| <b>AC103563.7</b> | -2.25 | 1.85E-01 | 1.00E+00 | 0.09  | 9.46E-01 | 9.92E-01 |
| <b>PRSS57</b>     | -1.44 | 2.79E-01 | 1.00E+00 | 0.10  | 9.46E-01 | 9.92E-01 |
| <b>SMG1P3</b>     | -0.06 | 8.90E-01 | 1.00E+00 | 0.04  | 9.46E-01 | 9.92E-01 |
| <b>PURB</b>       | -0.11 | 6.61E-01 | 1.00E+00 | -0.03 | 9.46E-01 | 9.92E-01 |
| <b>CEP72</b>      | 0.13  | 7.28E-01 | 1.00E+00 | 0.03  | 9.46E-01 | 9.92E-01 |

|                    |       |          |          |       |          |          |
|--------------------|-------|----------|----------|-------|----------|----------|
| <b>AC007969.1</b>  | -0.08 | 8.38E-01 | 1.00E+00 | 0.05  | 9.46E-01 | 9.92E-01 |
| <b>G22256</b>      | 0.59  | 6.62E-01 | 1.00E+00 | -0.05 | 9.46E-01 | 9.92E-01 |
| <b>SCRG1</b>       | -0.47 | 5.21E-01 | 1.00E+00 | -0.04 | 9.46E-01 | 9.92E-01 |
| <b>NBPF20</b>      | -1.22 | 7.51E-02 | 1.00E+00 | 0.03  | 9.46E-01 | 9.92E-01 |
| <b>CEP89</b>       | -0.25 | 1.34E-01 | 1.00E+00 | 0.01  | 9.46E-01 | 9.92E-01 |
| <b>AC090360.1</b>  | -0.03 | 9.86E-01 | 1.00E+00 | -0.08 | 9.46E-01 | 9.92E-01 |
| <b>CPNE8</b>       | 0.64  | 1.42E-01 | 1.00E+00 | -0.02 | 9.46E-01 | 9.92E-01 |
| <b>MORN3</b>       | 0.18  | 5.76E-01 | 1.00E+00 | -0.03 | 9.46E-01 | 9.92E-01 |
| <b>AC012306.2</b>  | -0.45 | 1.56E-01 | 1.00E+00 | 0.02  | 9.46E-01 | 9.92E-01 |
| <b>ATP1A2</b>      | 0.65  | 3.61E-01 | 1.00E+00 | 0.05  | 9.46E-01 | 9.92E-01 |
| <b>IL1RL2</b>      | 0.22  | 6.19E-01 | 1.00E+00 | -0.03 | 9.46E-01 | 9.92E-01 |
| <b>AC007342.7</b>  | -0.84 | 2.14E-01 | 1.00E+00 | 0.05  | 9.46E-01 | 9.92E-01 |
| <b>AL445248.1</b>  | 1.21  | 7.24E-01 | 1.00E+00 | 0.06  | 9.46E-01 | 9.92E-01 |
| <b>TECRL</b>       | 2.09  | 2.18E-01 | 1.00E+00 | -0.22 | 9.46E-01 | 9.92E-01 |
| <b>KCNMB1</b>      | 0.27  | 6.50E-01 | 1.00E+00 | -0.02 | 9.46E-01 | 9.92E-01 |
| <b>DDX18</b>       | 0.20  | 2.03E-01 | 1.00E+00 | 0.01  | 9.46E-01 | 9.92E-01 |
| <b>TAGLN2</b>      | -0.12 | 6.08E-01 | 1.00E+00 | -0.01 | 9.46E-01 | 9.92E-01 |
| <b>HBB</b>         | 0.43  | 7.37E-01 | 1.00E+00 | -0.21 | 9.46E-01 | 9.92E-01 |
| <b>XLOC_011942</b> | 2.37  | 2.20E-01 | 1.00E+00 | -0.19 | 9.46E-01 | 9.92E-01 |
| <b>DUS1L</b>       | -0.18 | 3.90E-01 | 1.00E+00 | -0.04 | 9.46E-01 | 9.92E-01 |
| <b>CLDN2</b>       | 0.21  | 8.17E-01 | 1.00E+00 | 0.21  | 9.46E-01 | 9.92E-01 |
| <b>PTPRA</b>       | -0.05 | 7.95E-01 | 1.00E+00 | 0.03  | 9.46E-01 | 9.92E-01 |
| <b>TMLHE-AS1</b>   | -2.45 | 2.23E-01 | 1.00E+00 | -0.07 | 9.47E-01 | 9.92E-01 |
| <b>ATP5S</b>       | 0.04  | 8.32E-01 | 1.00E+00 | -0.02 | 9.47E-01 | 9.92E-01 |
| <b>TBL3</b>        | -0.26 | 3.32E-01 | 1.00E+00 | 0.01  | 9.47E-01 | 9.92E-01 |
| <b>IGFBPL1</b>     | -3.21 | 2.20E-01 | 1.00E+00 | -0.11 | 9.47E-01 | 9.92E-01 |
| <b>TPGS1</b>       | -0.30 | 3.15E-01 | 1.00E+00 | -0.06 | 9.47E-01 | 9.92E-01 |
| <b>G11773</b>      | -0.74 | 3.74E-01 | 1.00E+00 | 0.05  | 9.47E-01 | 9.92E-01 |
| <b>AC123912.4</b>  | 0.36  | 6.81E-01 | 1.00E+00 | 0.07  | 9.47E-01 | 9.92E-01 |
| <b>ATP2A1-AS1</b>  | -2.04 | 4.77E-01 | 1.00E+00 | -0.06 | 9.47E-01 | 9.92E-01 |
| <b>DOC2B</b>       | -0.01 | 9.88E-01 | 1.00E+00 | -0.21 | 9.47E-01 | 9.92E-01 |
| <b>LINC02356</b>   | -2.91 | 5.07E-02 | 1.00E+00 | -0.06 | 9.47E-01 | 9.92E-01 |



|                   |       |          |          |       |          |          |
|-------------------|-------|----------|----------|-------|----------|----------|
| <b>AGGF1P1</b>    | 0.05  | 9.85E-01 | 1.00E+00 | -0.13 | 9.47E-01 | 9.92E-01 |
| <b>SPAST</b>      | 0.16  | 5.24E-01 | 1.00E+00 | 0.01  | 9.47E-01 | 9.92E-01 |
| <b>SMUG1-AS1</b>  | -0.26 | 6.64E-01 | 1.00E+00 | -0.05 | 9.47E-01 | 9.92E-01 |
| <b>LINC00398</b>  | 0.09  | 9.39E-01 | 1.00E+00 | -0.08 | 9.47E-01 | 9.92E-01 |
| <b>G11316</b>     | -1.93 | 4.11E-01 | 1.00E+00 | -0.12 | 9.47E-01 | 9.92E-01 |
| <b>SLC51A</b>     | 0.08  | 7.88E-01 | 1.00E+00 | -0.03 | 9.47E-01 | 9.92E-01 |
| <b>FTH1P3</b>     | -0.06 | 9.86E-01 | 1.00E+00 | -0.04 | 9.47E-01 | 9.92E-01 |
| <b>CDH16</b>      | -1.58 | 3.98E-01 | 1.00E+00 | -0.11 | 9.47E-01 | 9.92E-01 |
| <b>TWF1P1</b>     | -0.77 | 3.75E-01 | 1.00E+00 | 0.03  | 9.47E-01 | 9.92E-01 |
| <b>PTGDR2</b>     | 1.92  | 4.37E-03 | 3.74E-01 | 0.08  | 9.47E-01 | 9.92E-01 |
| <b>HOMER1</b>     | -0.47 | 1.77E-01 | 1.00E+00 | -0.03 | 9.48E-01 | 9.92E-01 |
| <b>CCNB1</b>      | 0.32  | 1.75E-01 | 1.00E+00 | -0.02 | 9.48E-01 | 9.92E-01 |
| <b>AC079140.5</b> | -1.80 | 3.54E-01 | 1.00E+00 | -0.07 | 9.48E-01 | 9.92E-01 |
| <b>NKTR</b>       | 0.35  | 4.75E-01 | 1.00E+00 | -0.02 | 9.48E-01 | 9.92E-01 |
| <b>PFN4</b>       | 0.38  | 6.98E-01 | 1.00E+00 | -0.06 | 9.48E-01 | 9.92E-01 |
| <b>AC069547.1</b> | -0.90 | 3.72E-02 | 1.00E+00 | -0.03 | 9.48E-01 | 9.92E-01 |
| <b>RASL10A</b>    | -0.26 | 7.64E-01 | 1.00E+00 | 0.07  | 9.48E-01 | 9.92E-01 |
| <b>TSTD2</b>      | -0.09 | 7.62E-01 | 1.00E+00 | -0.02 | 9.48E-01 | 9.92E-01 |
| <b>DERL1</b>      | 0.46  | 5.42E-02 | 1.00E+00 | 0.01  | 9.48E-01 | 9.92E-01 |
| <b>AC024940.1</b> | 0.44  | 5.90E-01 | 1.00E+00 | 0.05  | 9.48E-01 | 9.92E-01 |
| <b>SMC6</b>       | -0.16 | 4.79E-01 | 1.00E+00 | 0.01  | 9.48E-01 | 9.92E-01 |
| <b>SPRYD4</b>     | -0.23 | 3.23E-01 | 1.00E+00 | -0.01 | 9.48E-01 | 9.92E-01 |
| <b>KCNQ4</b>      | -0.90 | 6.24E-02 | 1.00E+00 | -0.06 | 9.48E-01 | 9.92E-01 |
| <b>PDZD7</b>      | 0.39  | 3.49E-01 | 1.00E+00 | -0.05 | 9.48E-01 | 9.92E-01 |
| <b>KRT8</b>       | -0.06 | 9.45E-01 | 1.00E+00 | 0.04  | 9.48E-01 | 9.92E-01 |
| <b>C1orf52</b>    | 0.03  | 8.76E-01 | 1.00E+00 | 0.01  | 9.48E-01 | 9.92E-01 |
| <b>DEPP1</b>      | -0.23 | 5.58E-01 | 1.00E+00 | -0.04 | 9.48E-01 | 9.92E-01 |
| <b>ESYT2</b>      | 0.16  | 3.25E-01 | 1.00E+00 | -0.03 | 9.48E-01 | 9.92E-01 |
| <b>DEGS2</b>      | -0.02 | 9.72E-01 | 1.00E+00 | 0.04  | 9.48E-01 | 9.92E-01 |
| <b>RABL2B</b>     | -0.10 | 7.29E-01 | 1.00E+00 | 0.01  | 9.48E-01 | 9.92E-01 |
| <b>AL162731.1</b> | -1.86 | 3.05E-01 | 1.00E+00 | 0.07  | 9.48E-01 | 9.92E-01 |
| <b>EHD4-AS1</b>   | -0.25 | 8.80E-01 | 1.00E+00 | 0.06  | 9.48E-01 | 9.92E-01 |

|                      |       |          |          |       |          |          |
|----------------------|-------|----------|----------|-------|----------|----------|
| <b>G26247</b>        | 0.63  | 6.67E-01 | 1.00E+00 | -0.07 | 9.48E-01 | 9.92E-01 |
| <b>TJP1</b>          | -0.12 | 5.03E-01 | 1.00E+00 | -0.01 | 9.49E-01 | 9.92E-01 |
| <b>YTHDF2P1</b>      | -0.18 | 9.59E-01 | 1.00E+00 | 0.03  | 9.49E-01 | 9.92E-01 |
| <b>XLOC_014405</b>   | 0.12  | 9.33E-01 | 1.00E+00 | -0.09 | 9.49E-01 | 9.92E-01 |
| <b>LANCL2</b>        | -0.15 | 6.05E-01 | 1.00E+00 | -0.01 | 9.49E-01 | 9.92E-01 |
| <b>SPACA9</b>        | -0.15 | 5.40E-01 | 1.00E+00 | -0.02 | 9.49E-01 | 9.92E-01 |
| <b>ULK4P3</b>        | 2.54  | 2.17E-01 | 1.00E+00 | 0.07  | 9.49E-01 | 9.92E-01 |
| <b>DKFZp779M0652</b> | 1.97  | 4.56E-02 | 1.00E+00 | -0.11 | 9.49E-01 | 9.92E-01 |
| <b>RAB5A</b>         | -0.20 | 4.70E-01 | 1.00E+00 | -0.01 | 9.49E-01 | 9.92E-01 |
| <b>RND1</b>          | -2.37 | 4.64E-02 | 1.00E+00 | -0.06 | 9.49E-01 | 9.92E-01 |
| <b>RPL22</b>         | 0.12  | 5.13E-01 | 1.00E+00 | -0.01 | 9.49E-01 | 9.92E-01 |
| <b>LRP2</b>          | -4.21 | 5.28E-05 | 1.40E-02 | 0.20  | 9.49E-01 | 9.92E-01 |
| <b>XLOC_011309</b>   | 1.36  | 5.27E-01 | 1.00E+00 | -0.10 | 9.49E-01 | 9.92E-01 |
| <b>PCID2</b>         | 0.24  | 3.09E-01 | 1.00E+00 | -0.02 | 9.49E-01 | 9.92E-01 |
| <b>CDHR4</b>         | -3.51 | 9.95E-03 | 6.19E-01 | 0.08  | 9.49E-01 | 9.92E-01 |
| <b>AF064858.3</b>    | -1.76 | 1.19E-01 | 1.00E+00 | 0.05  | 9.49E-01 | 9.92E-01 |
| <b>ETV7</b>          | -0.04 | 9.40E-01 | 1.00E+00 | 0.03  | 9.49E-01 | 9.92E-01 |
| <b>AC015883.1</b>    | 1.37  | 2.73E-01 | 1.00E+00 | -0.08 | 9.49E-01 | 9.92E-01 |
| <b>FAM35DP</b>       | -0.98 | 3.18E-01 | 1.00E+00 | -0.03 | 9.49E-01 | 9.92E-01 |
| <b>GPBP1</b>         | 0.11  | 4.91E-01 | 1.00E+00 | -0.01 | 9.50E-01 | 9.92E-01 |
| <b>CATSPERG</b>      | -0.24 | 5.97E-01 | 1.00E+00 | 0.03  | 9.50E-01 | 9.93E-01 |
| <b>RPS14P8</b>       | -2.07 | 5.39E-01 | 1.00E+00 | 0.20  | 9.50E-01 | 9.93E-01 |
| <b>VILL</b>          | 0.23  | 2.86E-01 | 1.00E+00 | -0.03 | 9.50E-01 | 9.93E-01 |
| <b>GUSBP9</b>        | 0.59  | 5.42E-01 | 1.00E+00 | 0.06  | 9.50E-01 | 9.93E-01 |
| <b>XLOC_000318</b>   | 1.17  | 2.31E-01 | 1.00E+00 | -0.16 | 9.50E-01 | 9.93E-01 |
| <b>AC108488.1</b>    | 0.61  | 5.72E-01 | 1.00E+00 | -0.04 | 9.50E-01 | 9.93E-01 |
| <b>HCG25</b>         | -2.32 | 1.76E-01 | 1.00E+00 | -0.05 | 9.50E-01 | 9.93E-01 |
| <b>ZNF736P9Y</b>     | 0.61  | 6.81E-01 | 1.00E+00 | 0.12  | 9.50E-01 | 9.93E-01 |
| <b>PTGR2</b>         | 0.87  | 6.79E-02 | 1.00E+00 | -0.03 | 9.50E-01 | 9.93E-01 |
| <b>XLOC_008126</b>   | 0.35  | 8.50E-01 | 1.00E+00 | -0.07 | 9.50E-01 | 9.93E-01 |
| <b>RPL23AP2</b>      | 1.50  | 6.62E-01 | 1.00E+00 | 0.05  | 9.50E-01 | 9.93E-01 |
| <b>TRAF6</b>         | 0.05  | 7.95E-01 | 1.00E+00 | -0.02 | 9.50E-01 | 9.93E-01 |

|                    |       |          |          |       |          |          |
|--------------------|-------|----------|----------|-------|----------|----------|
| <b>XLOC_011015</b> | 1.57  | 3.98E-01 | 1.00E+00 | 0.06  | 9.50E-01 | 9.93E-01 |
| <b>AL137847.2</b>  | 3.15  | 1.49E-01 | 1.00E+00 | -0.06 | 9.50E-01 | 9.93E-01 |
| <b>TRIOBP</b>      | -0.03 | 9.12E-01 | 1.00E+00 | -0.03 | 9.50E-01 | 9.93E-01 |
| <b>POLDIP3</b>     | 0.14  | 4.62E-01 | 1.00E+00 | -0.01 | 9.50E-01 | 9.93E-01 |
| <b>LINC00571</b>   | -0.05 | 9.54E-01 | 1.00E+00 | -0.06 | 9.50E-01 | 9.93E-01 |
| <b>RPL13P2</b>     | NA    | NA       | NA       | 0.05  | 9.50E-01 | 9.93E-01 |
| <b>G36172</b>      | -0.38 | 7.91E-01 | 1.00E+00 | -0.04 | 9.51E-01 | 9.93E-01 |
| <b>AL356258.1</b>  | 4.08  | 1.51E-01 | 1.00E+00 | 0.20  | 9.51E-01 | 9.93E-01 |
| <b>TATDN2P3</b>    | 2.15  | 2.16E-02 | 8.94E-01 | -0.08 | 9.51E-01 | 9.93E-01 |
| <b>SEC62</b>       | 0.29  | 2.97E-01 | 1.00E+00 | -0.01 | 9.51E-01 | 9.93E-01 |
| <b>DCAF8</b>       | 0.20  | 4.05E-01 | 1.00E+00 | 0.01  | 9.51E-01 | 9.93E-01 |
| <b>CCDC142</b>     | 0.04  | 9.23E-01 | 1.00E+00 | 0.04  | 9.51E-01 | 9.93E-01 |
| <b>XLOC_006198</b> | -0.79 | 8.19E-01 | 1.00E+00 | 0.09  | 9.51E-01 | 9.93E-01 |
| <b>UVRAG</b>       | 0.28  | 2.55E-01 | 1.00E+00 | 0.02  | 9.51E-01 | 9.93E-01 |
| <b>PCOTH</b>       | 0.44  | 8.99E-01 | 1.00E+00 | -0.06 | 9.51E-01 | 9.93E-01 |
| <b>F2RL3</b>       | -0.51 | 4.77E-01 | 1.00E+00 | -0.05 | 9.51E-01 | 9.93E-01 |
| <b>CLCN6</b>       | 0.24  | 5.17E-01 | 1.00E+00 | 0.03  | 9.51E-01 | 9.93E-01 |
| <b>REPS2</b>       | -0.01 | 9.76E-01 | 1.00E+00 | 0.03  | 9.51E-01 | 9.93E-01 |
| <b>PCDHGA4</b>     | -0.22 | 6.60E-01 | 1.00E+00 | -0.06 | 9.51E-01 | 9.93E-01 |
| <b>MYH1</b>        | 3.62  | 1.01E-01 | 1.00E+00 | -0.09 | 9.51E-01 | 9.93E-01 |
| <b>XLOC_013282</b> | -0.02 | 9.70E-01 | 1.00E+00 | -0.04 | 9.51E-01 | 9.93E-01 |
| <b>AC069185.1</b>  | -0.12 | 8.77E-01 | 1.00E+00 | 0.04  | 9.51E-01 | 9.93E-01 |
| <b>RPL34-AS1</b>   | 0.85  | 2.19E-01 | 1.00E+00 | 0.04  | 9.52E-01 | 9.93E-01 |
| <b>PPL</b>         | -0.16 | 7.27E-01 | 1.00E+00 | 0.03  | 9.52E-01 | 9.93E-01 |
| <b>AC005775.1</b>  | -2.23 | 2.65E-01 | 1.00E+00 | 0.07  | 9.52E-01 | 9.93E-01 |
| <b>ATP8B4</b>      | 0.84  | 2.55E-01 | 1.00E+00 | -0.04 | 9.52E-01 | 9.93E-01 |
| <b>AL118505.1</b>  | 0.04  | 9.45E-01 | 1.00E+00 | -0.05 | 9.52E-01 | 9.93E-01 |
| <b>LDB2</b>        | 0.27  | 6.00E-01 | 1.00E+00 | -0.03 | 9.52E-01 | 9.93E-01 |
| <b>AC087477.2</b>  | -0.16 | 8.67E-01 | 1.00E+00 | -0.05 | 9.52E-01 | 9.93E-01 |
| <b>NAA10</b>       | -0.01 | 9.83E-01 | 1.00E+00 | 0.01  | 9.52E-01 | 9.93E-01 |
| <b>TEDC1</b>       | -0.31 | 3.78E-01 | 1.00E+00 | -0.04 | 9.52E-01 | 9.93E-01 |
| <b>MIR762HG</b>    | -2.49 | 1.23E-01 | 1.00E+00 | 0.03  | 9.52E-01 | 9.93E-01 |

|                    |       |          |          |       |          |          |
|--------------------|-------|----------|----------|-------|----------|----------|
| <b>NDUFS7</b>      | -0.41 | 4.02E-01 | 1.00E+00 | -0.04 | 9.52E-01 | 9.93E-01 |
| <b>G11672</b>      | -0.26 | 7.32E-01 | 1.00E+00 | -0.10 | 9.52E-01 | 9.93E-01 |
| <b>MFAP1</b>       | 0.11  | 5.41E-01 | 1.00E+00 | -0.01 | 9.52E-01 | 9.93E-01 |
| <b>AC025569.1</b>  | 0.28  | 8.86E-01 | 1.00E+00 | 0.06  | 9.52E-01 | 9.93E-01 |
| <b>HNRNPR</b>      | -0.04 | 8.04E-01 | 1.00E+00 | 0.01  | 9.52E-01 | 9.93E-01 |
| <b>RHOD</b>        | 0.01  | 9.83E-01 | 1.00E+00 | 0.02  | 9.52E-01 | 9.93E-01 |
| <b>CCP110</b>      | 0.08  | 7.80E-01 | 1.00E+00 | -0.01 | 9.52E-01 | 9.93E-01 |
| <b>ZNF764</b>      | -0.06 | 8.09E-01 | 1.00E+00 | -0.03 | 9.52E-01 | 9.93E-01 |
| <b>RASD1</b>       | 0.28  | 6.37E-01 | 1.00E+00 | 0.04  | 9.52E-01 | 9.93E-01 |
| <b>FAM160A1-DT</b> | 0.71  | 1.99E-01 | 1.00E+00 | -0.05 | 9.52E-01 | 9.93E-01 |
| <b>CTXN1</b>       | -1.12 | 1.08E-02 | 6.40E-01 | 0.05  | 9.52E-01 | 9.93E-01 |
| <b>TMEM62</b>      | 0.27  | 3.86E-01 | 1.00E+00 | -0.03 | 9.52E-01 | 9.93E-01 |
| <b>ANLN</b>        | -0.05 | 8.93E-01 | 1.00E+00 | 0.03  | 9.52E-01 | 9.93E-01 |
| <b>NELL1</b>       | 1.43  | 3.38E-01 | 1.00E+00 | -0.19 | 9.52E-01 | 9.93E-01 |
| <b>LINC00852</b>   | 0.29  | 6.23E-01 | 1.00E+00 | 0.03  | 9.52E-01 | 9.93E-01 |
| <b>AL390195.2</b>  | 0.38  | 5.81E-01 | 1.00E+00 | -0.05 | 9.52E-01 | 9.93E-01 |
| <b>AC098934.2</b>  | -1.65 | 1.50E-01 | 1.00E+00 | -0.07 | 9.53E-01 | 9.93E-01 |
| <b>AC099687.1</b>  | 0.65  | 6.88E-01 | 1.00E+00 | 0.06  | 9.53E-01 | 9.93E-01 |
| <b>AL360270.2</b>  | 0.39  | 7.55E-01 | 1.00E+00 | 0.06  | 9.53E-01 | 9.93E-01 |
| <b>PCP4L1</b>      | -0.44 | 4.51E-01 | 1.00E+00 | -0.03 | 9.53E-01 | 9.93E-01 |
| <b>GPRC5A</b>      | -0.22 | 6.94E-01 | 1.00E+00 | 0.03  | 9.53E-01 | 9.93E-01 |
| <b>AC105052.2</b>  | -0.85 | 5.57E-01 | 1.00E+00 | -0.06 | 9.53E-01 | 9.93E-01 |
| <b>FBXL19</b>      | -0.55 | 1.35E-01 | 1.00E+00 | 0.19  | 9.53E-01 | 9.93E-01 |
| <b>AC009831.3</b>  | 2.47  | 1.86E-01 | 1.00E+00 | -0.06 | 9.53E-01 | 9.93E-01 |
| <b>NCOR1</b>       | -0.19 | 3.28E-01 | 1.00E+00 | -0.01 | 9.53E-01 | 9.93E-01 |
| <b>SPTBN2</b>      | -0.34 | 4.52E-01 | 1.00E+00 | 0.04  | 9.53E-01 | 9.93E-01 |
| <b>CAVIN1</b>      | 0.21  | 5.64E-01 | 1.00E+00 | 0.03  | 9.53E-01 | 9.93E-01 |
| <b>EFCAB13</b>     | -0.82 | 2.41E-01 | 1.00E+00 | 0.03  | 9.53E-01 | 9.93E-01 |
| <b>PRPH</b>        | 0.35  | 6.77E-01 | 1.00E+00 | -0.04 | 9.53E-01 | 9.93E-01 |
| <b>THSD7A</b>      | 0.17  | 7.10E-01 | 1.00E+00 | -0.03 | 9.53E-01 | 9.93E-01 |
| <b>KDM4A-AS1</b>   | 0.20  | 8.78E-01 | 1.00E+00 | -0.05 | 9.53E-01 | 9.93E-01 |
| <b>ZDHHC9</b>      | 0.16  | 6.19E-01 | 1.00E+00 | -0.01 | 9.53E-01 | 9.93E-01 |

|                   |       |          |          |       |          |          |
|-------------------|-------|----------|----------|-------|----------|----------|
| <b>RPL23AP78</b>  | NA    | NA       | NA       | 0.08  | 9.53E-01 | 9.93E-01 |
| <b>Z93930.3</b>   | -3.03 | 2.37E-02 | 9.15E-01 | -0.05 | 9.53E-01 | 9.93E-01 |
| <b>ZNF551</b>     | 0.36  | 1.54E-01 | 1.00E+00 | 0.02  | 9.53E-01 | 9.93E-01 |
| <b>LENG8-AS1</b>  | -0.57 | 2.97E-01 | 1.00E+00 | -0.04 | 9.53E-01 | 9.93E-01 |
| <b>PLVAP</b>      | 0.03  | 9.60E-01 | 1.00E+00 | -0.03 | 9.53E-01 | 9.93E-01 |
| <b>POLR2J2</b>    | -0.31 | 8.00E-01 | 1.00E+00 | -0.03 | 9.53E-01 | 9.93E-01 |
| <b>METTL14</b>    | -0.04 | 8.41E-01 | 1.00E+00 | 0.01  | 9.53E-01 | 9.93E-01 |
| <b>NOTUM</b>      | 0.04  | 9.13E-01 | 1.00E+00 | 0.05  | 9.53E-01 | 9.93E-01 |
| <b>XRCC2</b>      | -0.70 | 8.85E-02 | 1.00E+00 | 0.05  | 9.54E-01 | 9.93E-01 |
| <b>TBX21</b>      | -0.70 | 5.34E-01 | 1.00E+00 | 0.18  | 9.54E-01 | 9.93E-01 |
| <b>ZNF417</b>     | 0.11  | 7.82E-01 | 1.00E+00 | 0.02  | 9.54E-01 | 9.93E-01 |
| <b>KNSTRN</b>     | -0.18 | 4.11E-01 | 1.00E+00 | 0.02  | 9.54E-01 | 9.93E-01 |
| <b>LINC01836</b>  | 0.31  | 6.35E-01 | 1.00E+00 | -0.05 | 9.54E-01 | 9.93E-01 |
| <b>G4388</b>      | 0.75  | 2.65E-01 | 1.00E+00 | -0.05 | 9.54E-01 | 9.93E-01 |
| <b>HUNK</b>       | -0.30 | 3.70E-01 | 1.00E+00 | -0.03 | 9.54E-01 | 9.93E-01 |
| <b>LOXL4</b>      | 0.52  | 2.52E-01 | 1.00E+00 | 0.03  | 9.54E-01 | 9.93E-01 |
| <b>ZBTB22</b>     | -0.16 | 5.61E-01 | 1.00E+00 | 0.03  | 9.54E-01 | 9.93E-01 |
| <b>ANKK1</b>      | 0.00  | 9.99E-01 | 1.00E+00 | 0.05  | 9.54E-01 | 9.93E-01 |
| <b>PSMD1</b>      | 0.00  | 9.92E-01 | 1.00E+00 | -0.01 | 9.54E-01 | 9.93E-01 |
| <b>AC008464.1</b> | 2.85  | 7.79E-02 | 1.00E+00 | 0.11  | 9.54E-01 | 9.93E-01 |
| <b>MRPL9</b>      | 0.07  | 7.25E-01 | 1.00E+00 | -0.01 | 9.54E-01 | 9.93E-01 |
| <b>ZNF263</b>     | -0.04 | 8.14E-01 | 1.00E+00 | -0.03 | 9.54E-01 | 9.93E-01 |
| <b>AC244093.4</b> | -1.44 | 5.34E-01 | 1.00E+00 | -0.09 | 9.54E-01 | 9.93E-01 |
| <b>PRLR</b>       | 0.41  | 1.02E-01 | 1.00E+00 | 0.03  | 9.54E-01 | 9.93E-01 |
| <b>SLC44A5</b>    | 0.49  | 2.70E-01 | 1.00E+00 | 0.05  | 9.54E-01 | 9.93E-01 |
| <b>LNPEP</b>      | -0.02 | 9.19E-01 | 1.00E+00 | 0.02  | 9.54E-01 | 9.93E-01 |
| <b>METAP1D</b>    | -0.65 | 1.17E-01 | 1.00E+00 | -0.01 | 9.54E-01 | 9.93E-01 |
| <b>TMEM145</b>    | -2.16 | 7.16E-03 | 5.13E-01 | 0.09  | 9.54E-01 | 9.93E-01 |
| <b>AC007773.1</b> | -2.40 | 1.97E-01 | 1.00E+00 | 0.05  | 9.54E-01 | 9.93E-01 |
| <b>CNR1</b>       | 0.10  | 8.34E-01 | 1.00E+00 | -0.05 | 9.54E-01 | 9.93E-01 |
| <b>AP1S3</b>      | -0.56 | 2.30E-01 | 1.00E+00 | -0.03 | 9.55E-01 | 9.93E-01 |
| <b>ALS2CL</b>     | -0.32 | 3.38E-01 | 1.00E+00 | -0.02 | 9.55E-01 | 9.93E-01 |

|                    |       |          |          |       |          |          |
|--------------------|-------|----------|----------|-------|----------|----------|
| <b>PRRC1</b>       | -0.09 | 6.48E-01 | 1.00E+00 | -0.02 | 9.55E-01 | 9.93E-01 |
| <b>GLDN</b>        | 0.41  | 2.76E-01 | 1.00E+00 | 0.03  | 9.55E-01 | 9.93E-01 |
| <b>KCNE3</b>       | 0.22  | 7.34E-01 | 1.00E+00 | 0.03  | 9.55E-01 | 9.93E-01 |
| <b>GIT2</b>        | -0.03 | 9.00E-01 | 1.00E+00 | -0.01 | 9.55E-01 | 9.93E-01 |
| <b>G6796</b>       | -2.41 | 6.08E-02 | 1.00E+00 | 0.04  | 9.55E-01 | 9.93E-01 |
| <b>DUSP9</b>       | -0.04 | 9.51E-01 | 1.00E+00 | -0.07 | 9.55E-01 | 9.93E-01 |
| <b>PRPS1P2</b>     | 0.56  | 5.47E-01 | 1.00E+00 | -0.04 | 9.55E-01 | 9.93E-01 |
| <b>IFRD1</b>       | 0.45  | 8.11E-02 | 1.00E+00 | -0.01 | 9.55E-01 | 9.93E-01 |
| <b>CDCA5</b>       | -0.21 | 5.17E-01 | 1.00E+00 | 0.03  | 9.55E-01 | 9.94E-01 |
| <b>RPS20P2</b>     | NA    | NA       | NA       | -0.05 | 9.55E-01 | 9.94E-01 |
| <b>ARL2</b>        | -0.04 | 8.67E-01 | 1.00E+00 | -0.02 | 9.55E-01 | 9.94E-01 |
| <b>CLU</b>         | 0.61  | 2.08E-01 | 1.00E+00 | 0.02  | 9.56E-01 | 9.94E-01 |
| <b>TMCC2</b>       | -0.67 | 1.02E-02 | 6.27E-01 | 0.03  | 9.56E-01 | 9.94E-01 |
| <b>G5173</b>       | 0.10  | 9.32E-01 | 1.00E+00 | -0.10 | 9.56E-01 | 9.94E-01 |
| <b>TMSB10P1</b>    | 0.56  | 8.71E-01 | 1.00E+00 | 0.04  | 9.56E-01 | 9.94E-01 |
| <b>RPL7P22</b>     | 0.66  | 8.49E-01 | 1.00E+00 | 0.06  | 9.56E-01 | 9.94E-01 |
| <b>MAP2K2</b>      | -0.17 | 4.49E-01 | 1.00E+00 | 0.02  | 9.56E-01 | 9.94E-01 |
| <b>VAV3</b>        | 0.06  | 8.61E-01 | 1.00E+00 | -0.03 | 9.56E-01 | 9.94E-01 |
| <b>LRRC3B</b>      | -1.50 | 2.09E-01 | 1.00E+00 | 0.09  | 9.56E-01 | 9.94E-01 |
| <b>CNTD2</b>       | 2.13  | 1.60E-01 | 1.00E+00 | 0.05  | 9.56E-01 | 9.94E-01 |
| <b>SFXN2</b>       | -0.60 | 9.86E-02 | 1.00E+00 | 0.02  | 9.56E-01 | 9.94E-01 |
| <b>AL139384.2</b>  | 0.48  | 4.53E-01 | 1.00E+00 | -0.07 | 9.56E-01 | 9.94E-01 |
| <b>MZF1</b>        | -0.37 | 2.57E-01 | 1.00E+00 | -0.02 | 9.56E-01 | 9.94E-01 |
| <b>AL121821.1</b>  | -1.11 | 5.06E-01 | 1.00E+00 | 0.06  | 9.56E-01 | 9.94E-01 |
| <b>AL357078.1</b>  | 0.68  | 5.94E-01 | 1.00E+00 | -0.05 | 9.56E-01 | 9.94E-01 |
| <b>XLOC_008522</b> | -0.88 | 2.79E-01 | 1.00E+00 | 0.06  | 9.56E-01 | 9.94E-01 |
| <b>KCNJ9</b>       | -5.36 | 1.51E-06 | 5.44E-04 | 0.08  | 9.56E-01 | 9.94E-01 |
| <b>SEMA3B-AS1</b>  | -1.74 | 2.03E-01 | 1.00E+00 | -0.06 | 9.56E-01 | 9.94E-01 |
| <b>AL354733.2</b>  | -0.94 | 7.73E-01 | 1.00E+00 | 0.06  | 9.56E-01 | 9.94E-01 |
| <b>G3945</b>       | -0.70 | 4.40E-01 | 1.00E+00 | -0.04 | 9.57E-01 | 9.94E-01 |
| <b>AL133338.2</b>  | -0.96 | 7.37E-01 | 1.00E+00 | -0.03 | 9.57E-01 | 9.94E-01 |
| <b>AC025181.2</b>  | 0.03  | 9.56E-01 | 1.00E+00 | -0.03 | 9.57E-01 | 9.94E-01 |

|            |       |          |          |       |          |          |
|------------|-------|----------|----------|-------|----------|----------|
| TXNDC12    | 0.32  | 3.70E-01 | 1.00E+00 | -0.03 | 9.57E-01 | 9.94E-01 |
| LACTB      | 0.04  | 8.72E-01 | 1.00E+00 | -0.03 | 9.57E-01 | 9.94E-01 |
| FBXO4      | 0.09  | 7.02E-01 | 1.00E+00 | -0.01 | 9.57E-01 | 9.94E-01 |
| AC022613.1 | -2.90 | 9.00E-02 | 1.00E+00 | 0.07  | 9.57E-01 | 9.94E-01 |
| KDM3A      | -0.10 | 7.49E-01 | 1.00E+00 | -0.02 | 9.57E-01 | 9.94E-01 |
| LRRC19     | -1.38 | 5.57E-01 | 1.00E+00 | -0.07 | 9.57E-01 | 9.94E-01 |
| G10908     | -2.02 | 2.13E-01 | 1.00E+00 | 0.05  | 9.57E-01 | 9.94E-01 |
| MAP2K5     | -0.12 | 6.66E-01 | 1.00E+00 | 0.01  | 9.57E-01 | 9.94E-01 |
| PSMD9      | -0.65 | 1.32E-01 | 1.00E+00 | -0.02 | 9.57E-01 | 9.94E-01 |
| CKAP2L     | -0.27 | 5.34E-01 | 1.00E+00 | 0.03  | 9.57E-01 | 9.94E-01 |
| ARFGEF2    | 0.42  | 1.51E-02 | 7.65E-01 | 0.02  | 9.57E-01 | 9.94E-01 |
| ZNF155     | 0.12  | 7.51E-01 | 1.00E+00 | 0.02  | 9.57E-01 | 9.94E-01 |
| PUM2       | 0.08  | 6.72E-01 | 1.00E+00 | -0.02 | 9.57E-01 | 9.94E-01 |
| LINC01411  | -1.75 | 2.70E-01 | 1.00E+00 | 0.06  | 9.57E-01 | 9.94E-01 |
| UBE2D3P1   | -0.22 | 9.49E-01 | 1.00E+00 | -0.03 | 9.57E-01 | 9.94E-01 |
| POLR2J4    | -0.65 | 8.00E-02 | 1.00E+00 | -0.02 | 9.57E-01 | 9.94E-01 |
| IGFL1P1    | -0.10 | 9.23E-01 | 1.00E+00 | -0.05 | 9.57E-01 | 9.94E-01 |
| ZNF384     | -0.28 | 9.47E-02 | 1.00E+00 | -0.03 | 9.57E-01 | 9.94E-01 |
| STK32A     | 0.58  | 4.58E-01 | 1.00E+00 | 0.03  | 9.58E-01 | 9.94E-01 |
| DDX12P     | -0.97 | 6.99E-02 | 1.00E+00 | 0.05  | 9.58E-01 | 9.94E-01 |
| SCUBE3     | -0.69 | 3.36E-01 | 1.00E+00 | -0.04 | 9.58E-01 | 9.94E-01 |
| FALEC      | 0.42  | 5.65E-01 | 1.00E+00 | -0.04 | 9.58E-01 | 9.94E-01 |
| CLASP1     | -0.10 | 6.09E-01 | 1.00E+00 | -0.02 | 9.58E-01 | 9.94E-01 |
| AC005962.1 | -0.29 | 8.43E-01 | 1.00E+00 | 0.06  | 9.58E-01 | 9.94E-01 |
| SLC16A13   | 0.09  | 8.24E-01 | 1.00E+00 | 0.03  | 9.58E-01 | 9.94E-01 |
| TSPAN33    | -0.02 | 9.38E-01 | 1.00E+00 | -0.04 | 9.58E-01 | 9.94E-01 |
| LINC01960  | 1.08  | 1.16E-01 | 1.00E+00 | 0.05  | 9.58E-01 | 9.94E-01 |
| TBX5-AS1   | 1.62  | 4.23E-02 | 1.00E+00 | 0.15  | 9.58E-01 | 9.94E-01 |
| SLC19A2    | 0.13  | 7.83E-01 | 1.00E+00 | 0.02  | 9.58E-01 | 9.94E-01 |
| PPM1G      | -0.39 | 8.49E-02 | 1.00E+00 | -0.01 | 9.58E-01 | 9.94E-01 |
| NKX1-2     | -0.27 | 6.50E-01 | 1.00E+00 | -0.06 | 9.58E-01 | 9.94E-01 |
| MRI1       | -0.65 | 1.00E-01 | 1.00E+00 | 0.02  | 9.58E-01 | 9.94E-01 |

|                                  |       |          |          |       |          |          |
|----------------------------------|-------|----------|----------|-------|----------|----------|
| <b>AC036108.3</b>                | -0.73 | 4.90E-01 | 1.00E+00 | 0.07  | 9.58E-01 | 9.94E-01 |
| <b>RPL35A</b>                    | -0.04 | 8.93E-01 | 1.00E+00 | 0.01  | 9.58E-01 | 9.94E-01 |
| <b>METTL7B</b>                   | 3.85  | 1.02E-01 | 1.00E+00 | 0.05  | 9.58E-01 | 9.94E-01 |
| <b>AC104695.2</b>                | -1.66 | 1.56E-01 | 1.00E+00 | 0.04  | 9.58E-01 | 9.94E-01 |
| <b>ARHGAP27P1-BPTFP1-KPNA2P3</b> | -1.24 | 6.54E-01 | 1.00E+00 | -0.04 | 9.58E-01 | 9.94E-01 |
| <b>NHLH1</b>                     | -0.59 | 6.28E-01 | 1.00E+00 | -0.05 | 9.58E-01 | 9.94E-01 |
| <b>BEND5</b>                     | 0.20  | 6.63E-01 | 1.00E+00 | 0.02  | 9.58E-01 | 9.94E-01 |
| <b>AK5</b>                       | -1.17 | 2.89E-02 | 9.88E-01 | -0.03 | 9.58E-01 | 9.94E-01 |
| <b>SNAP29</b>                    | 0.00  | 9.96E-01 | 1.00E+00 | -0.01 | 9.58E-01 | 9.94E-01 |
| <b>AL365356.3</b>                | -2.79 | 2.32E-03 | 2.43E-01 | -0.05 | 9.59E-01 | 9.94E-01 |
| <b>FHIT</b>                      | 0.37  | 3.26E-01 | 1.00E+00 | 0.02  | 9.59E-01 | 9.94E-01 |
| <b>ANKLE2</b>                    | -0.11 | 6.03E-01 | 1.00E+00 | -0.02 | 9.59E-01 | 9.94E-01 |
| <b>AC093014.1</b>                | 0.73  | 8.33E-01 | 1.00E+00 | 0.04  | 9.59E-01 | 9.94E-01 |
| <b>KRT1</b>                      | -0.08 | 8.53E-01 | 1.00E+00 | -0.04 | 9.59E-01 | 9.94E-01 |
| <b>POLR1D</b>                    | 0.02  | 9.20E-01 | 1.00E+00 | -0.01 | 9.59E-01 | 9.94E-01 |
| <b>AC108860.2</b>                | -0.89 | 2.82E-01 | 1.00E+00 | -0.04 | 9.59E-01 | 9.94E-01 |
| <b>G18696</b>                    | 1.71  | 2.40E-01 | 1.00E+00 | -0.06 | 9.59E-01 | 9.94E-01 |
| <b>SP5</b>                       | 0.79  | 1.39E-01 | 1.00E+00 | -0.04 | 9.59E-01 | 9.94E-01 |
| <b>ALDH18A1</b>                  | -0.05 | 7.81E-01 | 1.00E+00 | 0.01  | 9.59E-01 | 9.94E-01 |
| <b>ATP8B5P</b>                   | 1.55  | 5.43E-01 | 1.00E+00 | -0.04 | 9.59E-01 | 9.94E-01 |
| <b>SSBP3-AS1</b>                 | 0.08  | 9.37E-01 | 1.00E+00 | 0.04  | 9.59E-01 | 9.94E-01 |
| <b>DCAF12L2</b>                  | 0.51  | 4.26E-01 | 1.00E+00 | 0.06  | 9.59E-01 | 9.94E-01 |
| <b>SAP130</b>                    | -0.38 | 1.53E-01 | 1.00E+00 | -0.02 | 9.59E-01 | 9.94E-01 |
| <b>ARHGAP10</b>                  | 0.26  | 1.27E-01 | 1.00E+00 | 0.01  | 9.59E-01 | 9.94E-01 |
| <b>P2RY14</b>                    | -0.11 | 7.87E-01 | 1.00E+00 | -0.02 | 9.59E-01 | 9.94E-01 |
| <b>KCTD6</b>                     | -0.01 | 9.84E-01 | 1.00E+00 | -0.02 | 9.59E-01 | 9.94E-01 |
| <b>IQC�</b>                      | -0.95 | 5.06E-02 | 1.00E+00 | -0.04 | 9.59E-01 | 9.94E-01 |
| <b>MCRIP2</b>                    | 0.13  | 7.97E-01 | 1.00E+00 | 0.03  | 9.59E-01 | 9.94E-01 |
| <b>GAS5-AS1</b>                  | -0.13 | 8.83E-01 | 1.00E+00 | -0.03 | 9.59E-01 | 9.94E-01 |
| <b>RAB25</b>                     | -0.06 | 8.75E-01 | 1.00E+00 | 0.03  | 9.59E-01 | 9.94E-01 |
| <b>AC098851.1</b>                | -0.36 | 8.99E-01 | 1.00E+00 | -0.06 | 9.60E-01 | 9.94E-01 |
| <b>SERPINB12</b>                 | 0.06  | 9.35E-01 | 1.00E+00 | 0.03  | 9.60E-01 | 9.94E-01 |



|                    |       |          |          |       |          |          |
|--------------------|-------|----------|----------|-------|----------|----------|
| <b>AC096921.2</b>  | -0.17 | 7.98E-01 | 1.00E+00 | 0.05  | 9.60E-01 | 9.94E-01 |
| <b>G26459</b>      | -1.47 | 1.62E-01 | 1.00E+00 | 0.04  | 9.60E-01 | 9.94E-01 |
| <b>ZNF484</b>      | -0.19 | 6.11E-01 | 1.00E+00 | 0.02  | 9.60E-01 | 9.94E-01 |
| <b>UBE2T</b>       | -0.07 | 8.42E-01 | 1.00E+00 | 0.02  | 9.60E-01 | 9.94E-01 |
| <b>XLOC_001188</b> | -1.03 | 2.41E-01 | 1.00E+00 | -0.03 | 9.60E-01 | 9.94E-01 |
| <b>BHLHE40</b>     | -0.80 | 3.55E-02 | 1.00E+00 | -0.02 | 9.60E-01 | 9.94E-01 |
| <b>INTS9</b>       | -0.06 | 7.49E-01 | 1.00E+00 | -0.01 | 9.60E-01 | 9.94E-01 |
| <b>AC104260.3</b>  | -0.77 | 7.77E-01 | 1.00E+00 | -0.07 | 9.60E-01 | 9.94E-01 |
| <b>AL021408.1</b>  | 1.36  | 1.97E-01 | 1.00E+00 | -0.15 | 9.60E-01 | 9.94E-01 |
| <b>NUP37</b>       | 0.18  | 4.46E-01 | 1.00E+00 | 0.01  | 9.60E-01 | 9.94E-01 |
| <b>RASSF7</b>      | -0.37 | 3.66E-01 | 1.00E+00 | -0.02 | 9.60E-01 | 9.94E-01 |
| <b>LRRC17</b>      | 0.65  | 1.57E-01 | 1.00E+00 | 0.02  | 9.60E-01 | 9.94E-01 |
| <b>ZNF493</b>      | -0.11 | 8.11E-01 | 1.00E+00 | 0.02  | 9.60E-01 | 9.94E-01 |
| <b>LMBRD2</b>      | -0.02 | 9.51E-01 | 1.00E+00 | -0.01 | 9.60E-01 | 9.94E-01 |
| <b>ANKZF1</b>      | 0.29  | 3.95E-01 | 1.00E+00 | 0.02  | 9.60E-01 | 9.94E-01 |
| <b>MGMT</b>        | 0.01  | 9.77E-01 | 1.00E+00 | 0.01  | 9.60E-01 | 9.94E-01 |
| <b>ARHGAP44</b>    | -0.16 | 7.14E-01 | 1.00E+00 | -0.03 | 9.61E-01 | 9.94E-01 |
| <b>XLOC_001446</b> | -0.23 | 6.60E-01 | 1.00E+00 | -0.04 | 9.61E-01 | 9.94E-01 |
| <b>AL359918.1</b>  | -0.58 | 8.67E-01 | 1.00E+00 | -0.03 | 9.61E-01 | 9.94E-01 |
| <b>FAM86C2P</b>    | -0.63 | 3.03E-02 | 1.00E+00 | -0.02 | 9.61E-01 | 9.94E-01 |
| <b>AC009495.3</b>  | 1.74  | 5.51E-01 | 1.00E+00 | -0.06 | 9.61E-01 | 9.94E-01 |
| <b>VAMP1</b>       | -0.48 | 3.54E-01 | 1.00E+00 | 0.03  | 9.61E-01 | 9.94E-01 |
| <b>LINC00861</b>   | 3.38  | 1.31E-01 | 1.00E+00 | -0.05 | 9.61E-01 | 9.94E-01 |
| <b>HDHD2</b>       | -0.85 | 2.90E-01 | 1.00E+00 | -0.03 | 9.61E-01 | 9.94E-01 |
| <b>AC090409.2</b>  | 0.90  | 7.96E-01 | 1.00E+00 | -0.12 | 9.61E-01 | 9.94E-01 |
| <b>PEF1</b>        | 0.05  | 7.82E-01 | 1.00E+00 | 0.01  | 9.61E-01 | 9.94E-01 |
| <b>AC005332.4</b>  | -0.49 | 9.47E-02 | 1.00E+00 | -0.04 | 9.61E-01 | 9.94E-01 |
| <b>FERMT2</b>      | 0.60  | 3.00E-01 | 1.00E+00 | -0.02 | 9.61E-01 | 9.94E-01 |
| <b>DEPTOR</b>      | 0.20  | 5.48E-01 | 1.00E+00 | 0.02  | 9.61E-01 | 9.94E-01 |
| <b>DIRAS3</b>      | -0.21 | 6.69E-01 | 1.00E+00 | 0.04  | 9.61E-01 | 9.94E-01 |
| <b>SCNN1A</b>      | -0.19 | 3.69E-01 | 1.00E+00 | -0.02 | 9.61E-01 | 9.94E-01 |
| <b>AGAP2-AS1</b>   | -1.15 | 5.17E-01 | 1.00E+00 | 0.04  | 9.61E-01 | 9.94E-01 |

|                    |       |          |          |       |          |          |
|--------------------|-------|----------|----------|-------|----------|----------|
| <b>AC099560.2</b>  | 0.02  | 9.68E-01 | 1.00E+00 | -0.03 | 9.61E-01 | 9.94E-01 |
| <b>PDZD8</b>       | -0.22 | 1.90E-01 | 1.00E+00 | -0.02 | 9.61E-01 | 9.94E-01 |
| <b>FAM57A</b>      | 0.26  | 4.49E-01 | 1.00E+00 | 0.02  | 9.61E-01 | 9.94E-01 |
| <b>AC111188.1</b>  | 2.03  | 1.90E-01 | 1.00E+00 | 0.07  | 9.61E-01 | 9.94E-01 |
| <b>FCHSD2</b>      | -0.06 | 8.17E-01 | 1.00E+00 | -0.02 | 9.61E-01 | 9.94E-01 |
| <b>PCYT1A</b>      | 0.18  | 3.70E-01 | 1.00E+00 | 0.01  | 9.61E-01 | 9.94E-01 |
| <b>WDR76</b>       | -0.13 | 5.50E-01 | 1.00E+00 | 0.01  | 9.61E-01 | 9.94E-01 |
| <b>AC018816.1</b>  | -0.02 | 9.89E-01 | 1.00E+00 | -0.02 | 9.61E-01 | 9.94E-01 |
| <b>PNMA6A</b>      | -1.04 | 2.21E-01 | 1.00E+00 | -0.06 | 9.61E-01 | 9.94E-01 |
| <b>RFX3</b>        | -0.10 | 7.42E-01 | 1.00E+00 | 0.02  | 9.62E-01 | 9.95E-01 |
| <b>GDAP1</b>       | -0.32 | 3.24E-01 | 1.00E+00 | -0.02 | 9.62E-01 | 9.95E-01 |
| <b>TMEM150C</b>    | 0.30  | 4.81E-01 | 1.00E+00 | -0.02 | 9.62E-01 | 9.95E-01 |
| <b>FOXM1</b>       | -0.65 | 1.53E-01 | 1.00E+00 | 0.03  | 9.62E-01 | 9.95E-01 |
| <b>NUP160</b>      | 0.23  | 3.07E-01 | 1.00E+00 | 0.01  | 9.62E-01 | 9.95E-01 |
| <b>WNT11</b>       | 0.25  | 4.77E-01 | 1.00E+00 | -0.12 | 9.62E-01 | 9.95E-01 |
| <b>GRK4</b>        | -0.01 | 9.74E-01 | 1.00E+00 | -0.03 | 9.62E-01 | 9.95E-01 |
| <b>TCHP</b>        | 0.05  | 8.85E-01 | 1.00E+00 | -0.02 | 9.62E-01 | 9.95E-01 |
| <b>ZNF582-AS1</b>  | 0.23  | 8.28E-01 | 1.00E+00 | 0.03  | 9.62E-01 | 9.95E-01 |
| <b>DAPL1</b>       | 0.05  | 9.15E-01 | 1.00E+00 | -0.03 | 9.62E-01 | 9.95E-01 |
| <b>AL590326.1</b>  | 0.33  | 6.85E-01 | 1.00E+00 | 0.06  | 9.62E-01 | 9.95E-01 |
| <b>PCDHB18P</b>    | -0.56 | 2.37E-01 | 1.00E+00 | -0.04 | 9.63E-01 | 9.95E-01 |
| <b>NDUFB7</b>      | -0.04 | 8.44E-01 | 1.00E+00 | 0.01  | 9.63E-01 | 9.95E-01 |
| <b>AC093525.7</b>  | 1.49  | 3.36E-01 | 1.00E+00 | 0.08  | 9.63E-01 | 9.95E-01 |
| <b>XLOC_005252</b> | -0.35 | 7.65E-01 | 1.00E+00 | 0.04  | 9.63E-01 | 9.95E-01 |
| <b>CERS1</b>       | -0.84 | 4.31E-01 | 1.00E+00 | 0.07  | 9.63E-01 | 9.95E-01 |
| <b>TUBGCP6</b>     | -0.48 | 2.24E-02 | 9.00E-01 | -0.03 | 9.63E-01 | 9.95E-01 |
| <b>FAM102A</b>     | -0.20 | 4.41E-01 | 1.00E+00 | 0.02  | 9.63E-01 | 9.95E-01 |
| <b>LEMD2</b>       | 0.05  | 8.02E-01 | 1.00E+00 | 0.03  | 9.63E-01 | 9.95E-01 |
| <b>RBPJ</b>        | 0.46  | 6.25E-02 | 1.00E+00 | -0.01 | 9.63E-01 | 9.95E-01 |
| <b>AL078621.1</b>  | 0.84  | 6.80E-01 | 1.00E+00 | -0.03 | 9.63E-01 | 9.95E-01 |
| <b>CCDC96</b>      | -0.03 | 9.11E-01 | 1.00E+00 | 0.03  | 9.63E-01 | 9.95E-01 |
| <b>BARX1</b>       | -3.01 | 4.01E-02 | 1.00E+00 | -0.08 | 9.63E-01 | 9.95E-01 |

|                   |       |          |          |       |          |          |
|-------------------|-------|----------|----------|-------|----------|----------|
| <b>AC012213.3</b> | -1.20 | 7.25E-01 | 1.00E+00 | 0.13  | 9.63E-01 | 9.95E-01 |
| WFDC5             | 0.36  | 4.23E-01 | 1.00E+00 | 0.03  | 9.63E-01 | 9.95E-01 |
| LARP7             | 0.05  | 8.53E-01 | 1.00E+00 | 0.01  | 9.63E-01 | 9.95E-01 |
| CARD10            | 0.22  | 5.90E-01 | 1.00E+00 | 0.02  | 9.63E-01 | 9.95E-01 |
| NUP153            | -0.20 | 3.69E-01 | 1.00E+00 | 0.02  | 9.64E-01 | 9.95E-01 |
| AP5S1             | 0.12  | 7.40E-01 | 1.00E+00 | -0.01 | 9.64E-01 | 9.95E-01 |
| KEAP1             | -0.04 | 8.24E-01 | 1.00E+00 | 0.01  | 9.64E-01 | 9.95E-01 |
| DIRAS1            | -0.72 | 1.55E-01 | 1.00E+00 | -0.03 | 9.64E-01 | 9.95E-01 |
| XLOC_009067       | -0.53 | 5.30E-01 | 1.00E+00 | -0.05 | 9.64E-01 | 9.95E-01 |
| CASC15            | -0.36 | 5.30E-01 | 1.00E+00 | 0.02  | 9.64E-01 | 9.95E-01 |
| OXTR              | -2.30 | 1.44E-02 | 7.56E-01 | -0.05 | 9.64E-01 | 9.95E-01 |
| CPSF4             | 0.30  | 1.98E-01 | 1.00E+00 | -0.02 | 9.64E-01 | 9.95E-01 |
| AL589880.1        | -0.17 | 8.70E-01 | 1.00E+00 | 0.03  | 9.64E-01 | 9.95E-01 |
| TRAPPC12-AS1      | -0.58 | 4.75E-01 | 1.00E+00 | -0.04 | 9.64E-01 | 9.95E-01 |
| ZBTB7A            | -0.24 | 4.18E-01 | 1.00E+00 | 0.03  | 9.64E-01 | 9.95E-01 |
| C8orf59           | -1.07 | 9.85E-02 | 1.00E+00 | 0.02  | 9.64E-01 | 9.95E-01 |
| AL670729.1        | -2.05 | 1.29E-01 | 1.00E+00 | -0.03 | 9.64E-01 | 9.95E-01 |
| AC108477.1        | -1.35 | 7.47E-02 | 1.00E+00 | 0.05  | 9.64E-01 | 9.95E-01 |
| OFD1              | 0.01  | 9.75E-01 | 1.00E+00 | 0.01  | 9.64E-01 | 9.95E-01 |
| PMP22             | 0.41  | 2.40E-01 | 1.00E+00 | 0.01  | 9.64E-01 | 9.95E-01 |
| AC016924.1        | 2.54  | 7.42E-02 | 1.00E+00 | -0.05 | 9.64E-01 | 9.95E-01 |
| AC005838.2        | 0.48  | 5.64E-01 | 1.00E+00 | 0.04  | 9.64E-01 | 9.95E-01 |
| GRM4              | -0.84 | 4.05E-01 | 1.00E+00 | 0.06  | 9.64E-01 | 9.95E-01 |
| RPS10P3           | -0.86 | 2.85E-01 | 1.00E+00 | 0.03  | 9.64E-01 | 9.95E-01 |
| G35821            | 0.09  | 8.80E-01 | 1.00E+00 | -0.03 | 9.64E-01 | 9.95E-01 |
| HPX               | -0.55 | 7.07E-01 | 1.00E+00 | -0.07 | 9.64E-01 | 9.95E-01 |
| ITGB7             | -0.23 | 6.41E-01 | 1.00E+00 | -0.13 | 9.64E-01 | 9.95E-01 |
| WNT5B             | -0.33 | 3.49E-01 | 1.00E+00 | 0.02  | 9.64E-01 | 9.95E-01 |
| SAMD13            | -0.47 | 5.41E-01 | 1.00E+00 | -0.04 | 9.64E-01 | 9.95E-01 |
| MAP1LC3B2         | -0.44 | 6.52E-01 | 1.00E+00 | 0.02  | 9.64E-01 | 9.95E-01 |
| AC010654.1        | -0.56 | 5.98E-01 | 1.00E+00 | 0.03  | 9.65E-01 | 9.95E-01 |
| XLOC_010730       | 5.36  | 9.35E-02 | 1.00E+00 | -0.05 | 9.65E-01 | 9.96E-01 |

|            |       |          |          |       |          |          |
|------------|-------|----------|----------|-------|----------|----------|
| REPIN1     | -0.11 | 6.78E-01 | 1.00E+00 | -0.03 | 9.65E-01 | 9.96E-01 |
| UBAP2      | -0.27 | 3.02E-01 | 1.00E+00 | 0.01  | 9.65E-01 | 9.96E-01 |
| AC019080.1 | 0.43  | 3.16E-01 | 1.00E+00 | 0.02  | 9.65E-01 | 9.96E-01 |
| C2CD2L     | -0.26 | 4.08E-01 | 1.00E+00 | 0.02  | 9.65E-01 | 9.96E-01 |
| ALG12      | -0.10 | 6.78E-01 | 1.00E+00 | 0.01  | 9.65E-01 | 9.96E-01 |
| FOXO3B     | -0.42 | 2.57E-01 | 1.00E+00 | -0.04 | 9.65E-01 | 9.96E-01 |
| AL033543.1 | 0.14  | 9.15E-01 | 1.00E+00 | -0.03 | 9.65E-01 | 9.96E-01 |
| DDAH2      | 0.38  | 2.57E-01 | 1.00E+00 | 0.01  | 9.65E-01 | 9.96E-01 |
| CHRNE      | -0.34 | 6.94E-01 | 1.00E+00 | 0.02  | 9.65E-01 | 9.96E-01 |
| G26207     | -2.58 | 1.13E-01 | 1.00E+00 | 0.05  | 9.65E-01 | 9.96E-01 |
| DHRS7      | -0.03 | 9.00E-01 | 1.00E+00 | -0.01 | 9.65E-01 | 9.96E-01 |
| DPY19L1    | 0.20  | 5.40E-01 | 1.00E+00 | 0.02  | 9.65E-01 | 9.96E-01 |
| SURF4      | 0.25  | 2.17E-01 | 1.00E+00 | 0.01  | 9.65E-01 | 9.96E-01 |
| AL132657.1 | -0.53 | 6.86E-01 | 1.00E+00 | 0.04  | 9.65E-01 | 9.96E-01 |
| CBLL1      | -0.12 | 5.02E-01 | 1.00E+00 | 0.01  | 9.66E-01 | 9.96E-01 |
| TMEM184C   | 0.29  | 6.39E-02 | 1.00E+00 | -0.01 | 9.66E-01 | 9.96E-01 |
| TMEM63C    | 0.05  | 9.41E-01 | 1.00E+00 | -0.13 | 9.66E-01 | 9.96E-01 |
| TSC2       | -0.25 | 3.76E-01 | 1.00E+00 | 0.02  | 9.66E-01 | 9.96E-01 |
| RPL4P4     | -0.15 | 7.47E-01 | 1.00E+00 | 0.03  | 9.66E-01 | 9.96E-01 |
| LRRC75A    | -0.70 | 2.26E-01 | 1.00E+00 | 0.04  | 9.66E-01 | 9.96E-01 |
| INPP5F     | -0.01 | 9.74E-01 | 1.00E+00 | -0.01 | 9.66E-01 | 9.96E-01 |
| BMP3       | 1.01  | 8.13E-02 | 1.00E+00 | -0.10 | 9.66E-01 | 9.96E-01 |
| IL19       | -1.28 | 7.10E-01 | 1.00E+00 | -0.14 | 9.66E-01 | 9.96E-01 |
| NXPH3      | 0.32  | 5.10E-01 | 1.00E+00 | 0.03  | 9.66E-01 | 9.96E-01 |
| G10060     | -0.21 | 8.08E-01 | 1.00E+00 | -0.04 | 9.66E-01 | 9.96E-01 |
| SPINT2     | 0.04  | 8.87E-01 | 1.00E+00 | 0.02  | 9.66E-01 | 9.96E-01 |
| SNAI3-AS1  | -0.11 | 8.60E-01 | 1.00E+00 | -0.03 | 9.66E-01 | 9.96E-01 |
| SNTB1      | 0.11  | 7.16E-01 | 1.00E+00 | -0.02 | 9.66E-01 | 9.96E-01 |
| AC131254.1 | -1.97 | 5.67E-01 | 1.00E+00 | 0.13  | 9.66E-01 | 9.96E-01 |
| TBX4       | 0.64  | 5.45E-01 | 1.00E+00 | -0.13 | 9.66E-01 | 9.96E-01 |
| CCT2       | 0.05  | 8.21E-01 | 1.00E+00 | 0.01  | 9.66E-01 | 9.96E-01 |
| ENOX1      | -0.17 | 7.25E-01 | 1.00E+00 | 0.03  | 9.66E-01 | 9.96E-01 |

|            |       |          |          |       |          |          |
|------------|-------|----------|----------|-------|----------|----------|
| TMEM125    | -0.02 | 9.63E-01 | 1.00E+00 | -0.02 | 9.66E-01 | 9.96E-01 |
| SLC52A2    | -0.08 | 7.66E-01 | 1.00E+00 | -0.02 | 9.66E-01 | 9.96E-01 |
| SYT12      | -0.81 | 1.73E-01 | 1.00E+00 | 0.04  | 9.66E-01 | 9.96E-01 |
| ZCWPW1     | -0.12 | 6.62E-01 | 1.00E+00 | 0.01  | 9.66E-01 | 9.96E-01 |
| TUBG1      | -0.11 | 5.98E-01 | 1.00E+00 | -0.01 | 9.66E-01 | 9.96E-01 |
| RBM12B     | -0.04 | 9.06E-01 | 1.00E+00 | 0.02  | 9.66E-01 | 9.96E-01 |
| OSBPL10    | 0.08  | 7.17E-01 | 1.00E+00 | 0.02  | 9.67E-01 | 9.96E-01 |
| TIGD2      | 0.09  | 7.74E-01 | 1.00E+00 | -0.01 | 9.67E-01 | 9.96E-01 |
| AC002116.2 | -1.64 | 4.54E-01 | 1.00E+00 | -0.03 | 9.67E-01 | 9.96E-01 |
| FNDC5      | 0.40  | 6.30E-01 | 1.00E+00 | 0.03  | 9.67E-01 | 9.96E-01 |
| FAM192A    | -0.05 | 7.73E-01 | 1.00E+00 | -0.01 | 9.67E-01 | 9.96E-01 |
| CRELD2     | -0.25 | 3.06E-01 | 1.00E+00 | 0.01  | 9.67E-01 | 9.96E-01 |
| PPARGC1B   | -0.04 | 8.98E-01 | 1.00E+00 | 0.02  | 9.67E-01 | 9.96E-01 |
| RPS15AP1   | 0.09  | 9.44E-01 | 1.00E+00 | 0.03  | 9.67E-01 | 9.96E-01 |
| MT1DP      | -2.88 | 2.60E-01 | 1.00E+00 | 0.05  | 9.67E-01 | 9.96E-01 |
| RPL7P44    | NA    | NA       | NA       | -0.04 | 9.67E-01 | 9.96E-01 |
| G32188     | -0.05 | 9.36E-01 | 1.00E+00 | 0.05  | 9.67E-01 | 9.96E-01 |
| LINC02362  | 0.38  | 9.11E-01 | 1.00E+00 | -0.07 | 9.67E-01 | 9.96E-01 |
| ERBB2      | -0.04 | 8.80E-01 | 1.00E+00 | -0.02 | 9.67E-01 | 9.96E-01 |
| KDM4C      | -0.08 | 7.78E-01 | 1.00E+00 | -0.01 | 9.67E-01 | 9.96E-01 |
| AC138035.1 | -4.08 | 8.32E-02 | 1.00E+00 | -0.05 | 9.67E-01 | 9.96E-01 |
| AC018462.1 | 0.59  | 5.31E-01 | 1.00E+00 | -0.04 | 9.67E-01 | 9.96E-01 |
| E2F4       | -0.26 | 3.25E-01 | 1.00E+00 | 0.02  | 9.67E-01 | 9.96E-01 |
| SYT5       | -1.09 | 3.75E-01 | 1.00E+00 | -0.06 | 9.68E-01 | 9.96E-01 |
| RPL39      | -0.13 | 6.67E-01 | 1.00E+00 | -0.01 | 9.68E-01 | 9.96E-01 |
| THOC3      | -0.06 | 7.95E-01 | 1.00E+00 | 0.01  | 9.68E-01 | 9.96E-01 |
| ADCY5      | 0.58  | 4.44E-01 | 1.00E+00 | -0.03 | 9.68E-01 | 9.96E-01 |
| RBMS3      | 0.53  | 2.98E-01 | 1.00E+00 | 0.02  | 9.68E-01 | 9.96E-01 |
| ZNF415     | 0.32  | 5.58E-01 | 1.00E+00 | -0.02 | 9.68E-01 | 9.96E-01 |
| PSMB7      | -0.14 | 4.50E-01 | 1.00E+00 | -0.01 | 9.68E-01 | 9.96E-01 |
| CCDC140    | -1.03 | 2.56E-01 | 1.00E+00 | 0.05  | 9.68E-01 | 9.96E-01 |
| CC2D2A     | 0.29  | 4.40E-01 | 1.00E+00 | -0.02 | 9.68E-01 | 9.96E-01 |

|            |       |          |          |       |          |          |
|------------|-------|----------|----------|-------|----------|----------|
| WLS        | 0.10  | 6.34E-01 | 1.00E+00 | -0.01 | 9.68E-01 | 9.96E-01 |
| PRTG       | -0.26 | 7.01E-01 | 1.00E+00 | -0.03 | 9.68E-01 | 9.96E-01 |
| AC004980.2 | -0.21 | 8.55E-01 | 1.00E+00 | -0.05 | 9.68E-01 | 9.96E-01 |
| FAM91A1    | 0.41  | 1.00E-01 | 1.00E+00 | 0.01  | 9.68E-01 | 9.96E-01 |
| MYCT1      | 0.50  | 4.01E-01 | 1.00E+00 | -0.02 | 9.68E-01 | 9.96E-01 |
| TMEM259    | -0.04 | 8.32E-01 | 1.00E+00 | -0.03 | 9.68E-01 | 9.96E-01 |
| RFTN2      | 0.38  | 4.36E-01 | 1.00E+00 | -0.02 | 9.68E-01 | 9.96E-01 |
| RPS6P25    | 0.58  | 8.66E-01 | 1.00E+00 | 0.04  | 9.68E-01 | 9.96E-01 |
| DYDC2      | -2.81 | 3.53E-02 | 1.00E+00 | -0.05 | 9.68E-01 | 9.96E-01 |
| IDH3G      | -0.27 | 1.97E-01 | 1.00E+00 | 0.01  | 9.68E-01 | 9.96E-01 |
| ERI1       | 0.30  | 3.43E-01 | 1.00E+00 | -0.01 | 9.68E-01 | 9.96E-01 |
| AL591848.3 | -1.02 | 6.06E-01 | 1.00E+00 | -0.06 | 9.69E-01 | 9.96E-01 |
| TRPC4AP    | 0.30  | 2.35E-01 | 1.00E+00 | 0.01  | 9.69E-01 | 9.96E-01 |
| GPR87      | 0.39  | 2.94E-01 | 1.00E+00 | 0.03  | 9.69E-01 | 9.96E-01 |
| MEOX2      | 0.47  | 3.58E-01 | 1.00E+00 | -0.02 | 9.69E-01 | 9.96E-01 |
| SLC6A4     | 1.74  | 2.34E-02 | 9.15E-01 | 0.03  | 9.69E-01 | 9.96E-01 |
| HEMK1      | -0.38 | 7.45E-02 | 1.00E+00 | 0.01  | 9.69E-01 | 9.96E-01 |
| AL451042.1 | -0.26 | 8.18E-01 | 1.00E+00 | 0.03  | 9.69E-01 | 9.96E-01 |
| SPG7       | 0.08  | 6.80E-01 | 1.00E+00 | -0.02 | 9.69E-01 | 9.96E-01 |
| A2MP1      | -0.39 | 8.59E-01 | 1.00E+00 | 0.05  | 9.69E-01 | 9.96E-01 |
| C1orf35    | -0.03 | 8.96E-01 | 1.00E+00 | 0.01  | 9.69E-01 | 9.96E-01 |
| ATP10B     | -0.26 | 6.54E-01 | 1.00E+00 | 0.03  | 9.69E-01 | 9.96E-01 |
| HSPB6      | 1.63  | 6.19E-02 | 1.00E+00 | -0.03 | 9.69E-01 | 9.96E-01 |
| SALL2      | 0.08  | 8.38E-01 | 1.00E+00 | 0.03  | 9.69E-01 | 9.96E-01 |
| AC072022.2 | 0.30  | 8.09E-01 | 1.00E+00 | 0.03  | 9.69E-01 | 9.96E-01 |
| RPL23P8    | -0.68 | 8.44E-01 | 1.00E+00 | 0.03  | 9.69E-01 | 9.96E-01 |
| GABARAPL1  | 0.28  | 4.88E-01 | 1.00E+00 | 0.01  | 9.69E-01 | 9.96E-01 |
| KIF3A      | -0.36 | 1.61E-01 | 1.00E+00 | -0.01 | 9.69E-01 | 9.96E-01 |
| ZNF48      | -0.32 | 1.66E-01 | 1.00E+00 | 0.02  | 9.69E-01 | 9.96E-01 |
| TBX5       | 1.15  | 1.76E-01 | 1.00E+00 | -0.12 | 9.69E-01 | 9.96E-01 |
| G18244     | 0.07  | 8.81E-01 | 1.00E+00 | 0.02  | 9.69E-01 | 9.96E-01 |
| WDFY3-AS2  | 0.66  | 6.38E-02 | 1.00E+00 | 0.02  | 9.69E-01 | 9.96E-01 |

|                     |       |          |          |       |          |          |
|---------------------|-------|----------|----------|-------|----------|----------|
| <b>RC3H2</b>        | 0.05  | 7.99E-01 | 1.00E+00 | 0.01  | 9.69E-01 | 9.96E-01 |
| <b>MTMR10</b>       | 0.09  | 6.83E-01 | 1.00E+00 | -0.01 | 9.69E-01 | 9.96E-01 |
| <b>MTND5P11</b>     | -0.23 | 9.47E-01 | 1.00E+00 | -0.02 | 9.70E-01 | 9.96E-01 |
| <b>DOP1A</b>        | 0.02  | 9.41E-01 | 1.00E+00 | 0.01  | 9.70E-01 | 9.96E-01 |
| <b>LINC00431</b>    | -3.68 | 3.90E-02 | 1.00E+00 | -0.05 | 9.70E-01 | 9.96E-01 |
| <b>LINC00997</b>    | 0.07  | 9.08E-01 | 1.00E+00 | -0.03 | 9.70E-01 | 9.96E-01 |
| <b>CDKN2AIP</b>     | 0.25  | 2.70E-01 | 1.00E+00 | -0.01 | 9.70E-01 | 9.96E-01 |
| <b>GRIN1</b>        | -1.35 | 4.38E-02 | 1.00E+00 | -0.03 | 9.70E-01 | 9.96E-01 |
| <b>CASC8</b>        | -1.01 | 4.21E-01 | 1.00E+00 | -0.03 | 9.70E-01 | 9.96E-01 |
| <b>TMEM50A</b>      | 0.16  | 3.63E-01 | 1.00E+00 | 0.01  | 9.70E-01 | 9.96E-01 |
| <b>KIF11</b>        | -0.06 | 8.69E-01 | 1.00E+00 | 0.02  | 9.70E-01 | 9.96E-01 |
| <b>PSMA6P1</b>      | 0.60  | 6.34E-01 | 1.00E+00 | -0.02 | 9.70E-01 | 9.96E-01 |
| <b>BCL10</b>        | -0.06 | 7.43E-01 | 1.00E+00 | -0.01 | 9.70E-01 | 9.96E-01 |
| <b>AVPR1A</b>       | 0.22  | 6.72E-01 | 1.00E+00 | -0.03 | 9.70E-01 | 9.96E-01 |
| <b>SPRTN</b>        | -0.09 | 7.46E-01 | 1.00E+00 | 0.01  | 9.70E-01 | 9.96E-01 |
| <b>GPRIN1</b>       | -1.45 | 2.36E-02 | 9.15E-01 | -0.12 | 9.70E-01 | 9.96E-01 |
| <b>YBX1P1</b>       | -0.39 | 3.45E-01 | 1.00E+00 | -0.02 | 9.70E-01 | 9.96E-01 |
| <b>EMC8</b>         | 0.02  | 9.09E-01 | 1.00E+00 | 0.01  | 9.70E-01 | 9.96E-01 |
| <b>KBTBD11</b>      | 0.05  | 9.15E-01 | 1.00E+00 | 0.08  | 9.70E-01 | 9.96E-01 |
| <b>ZFP69</b>        | -0.25 | 4.68E-01 | 1.00E+00 | 0.02  | 9.70E-01 | 9.96E-01 |
| <b>STEAP3-AS1</b>   | -2.05 | 5.52E-01 | 1.00E+00 | -0.05 | 9.70E-01 | 9.96E-01 |
| <b>DENND6A-DT</b>   | -2.12 | 5.36E-01 | 1.00E+00 | 0.12  | 9.70E-01 | 9.96E-01 |
| <b>RP6-206I17.2</b> | 3.55  | 9.07E-02 | 1.00E+00 | -0.03 | 9.70E-01 | 9.96E-01 |
| <b>WDHD1</b>        | -0.17 | 6.00E-01 | 1.00E+00 | 0.01  | 9.71E-01 | 9.96E-01 |
| <b>GRM3</b>         | -1.70 | 2.63E-01 | 1.00E+00 | -0.03 | 9.71E-01 | 9.96E-01 |
| <b>LINC02449</b>    | -0.98 | 5.42E-01 | 1.00E+00 | -0.04 | 9.71E-01 | 9.96E-01 |
| <b>TMEM225B</b>     | -2.81 | 1.02E-01 | 1.00E+00 | -0.02 | 9.71E-01 | 9.96E-01 |
| <b>EZH2</b>         | -0.20 | 5.83E-01 | 1.00E+00 | -0.02 | 9.71E-01 | 9.96E-01 |
| <b>LGALS8</b>       | -0.03 | 9.12E-01 | 1.00E+00 | 0.01  | 9.71E-01 | 9.96E-01 |
| <b>ABHD12</b>       | -0.02 | 9.31E-01 | 1.00E+00 | 0.01  | 9.71E-01 | 9.96E-01 |
| <b>AC135050.6</b>   | -0.05 | 8.94E-01 | 1.00E+00 | -0.02 | 9.71E-01 | 9.96E-01 |
| <b>PKP2</b>         | 0.18  | 6.76E-01 | 1.00E+00 | -0.02 | 9.71E-01 | 9.96E-01 |

|            |       |          |          |       |          |          |
|------------|-------|----------|----------|-------|----------|----------|
| VCL        | -0.18 | 4.42E-01 | 1.00E+00 | 0.01  | 9.71E-01 | 9.96E-01 |
| ERMARD     | 0.12  | 7.26E-01 | 1.00E+00 | -0.01 | 9.71E-01 | 9.96E-01 |
| ATP10D     | 0.00  | 9.92E-01 | 1.00E+00 | -0.01 | 9.71E-01 | 9.96E-01 |
| SPATA6     | 0.16  | 5.43E-01 | 1.00E+00 | -0.01 | 9.71E-01 | 9.96E-01 |
| RBM33      | -0.18 | 5.36E-01 | 1.00E+00 | -0.01 | 9.71E-01 | 9.96E-01 |
| CCDC69     | 0.75  | 1.70E-01 | 1.00E+00 | -0.03 | 9.71E-01 | 9.96E-01 |
| TTYH1      | -0.08 | 9.03E-01 | 1.00E+00 | -0.02 | 9.71E-01 | 9.96E-01 |
| RPS4XP8    | NA    | NA       | NA       | 0.11  | 9.71E-01 | 9.96E-01 |
| MSANTD4    | 0.24  | 5.09E-01 | 1.00E+00 | -0.01 | 9.71E-01 | 9.96E-01 |
| ZDBF2      | 0.08  | 8.11E-01 | 1.00E+00 | -0.02 | 9.71E-01 | 9.97E-01 |
| USP9Y      | 0.25  | 6.81E-01 | 1.00E+00 | 0.03  | 9.71E-01 | 9.97E-01 |
| CHAF1B     | -0.27 | 2.19E-01 | 1.00E+00 | 0.01  | 9.71E-01 | 9.97E-01 |
| L2HGDH     | 0.03  | 9.40E-01 | 1.00E+00 | -0.01 | 9.71E-01 | 9.97E-01 |
| GEMIN6     | 0.15  | 5.78E-01 | 1.00E+00 | 0.01  | 9.71E-01 | 9.97E-01 |
| AC020915.3 | 0.34  | 5.94E-01 | 1.00E+00 | 0.02  | 9.71E-01 | 9.97E-01 |
| EXOC8      | -0.28 | 2.60E-01 | 1.00E+00 | -0.01 | 9.72E-01 | 9.97E-01 |
| SRL        | 0.10  | 8.80E-01 | 1.00E+00 | -0.03 | 9.72E-01 | 9.97E-01 |
| BX649597.1 | -2.02 | 2.46E-01 | 1.00E+00 | -0.04 | 9.72E-01 | 9.97E-01 |
| AL672207.1 | -0.49 | 7.07E-01 | 1.00E+00 | -0.02 | 9.72E-01 | 9.97E-01 |
| AC107464.3 | 1.47  | 3.10E-01 | 1.00E+00 | 0.04  | 9.72E-01 | 9.97E-01 |
| CYSLTR1    | 0.59  | 3.51E-01 | 1.00E+00 | 0.01  | 9.72E-01 | 9.97E-01 |
| ITGBL1     | 0.56  | 2.78E-01 | 1.00E+00 | -0.02 | 9.72E-01 | 9.97E-01 |
| AC007950.2 | -0.07 | 9.85E-01 | 1.00E+00 | -0.05 | 9.72E-01 | 9.97E-01 |
| CYTH3      | 0.09  | 7.12E-01 | 1.00E+00 | 0.02  | 9.72E-01 | 9.97E-01 |
| CBARP      | -0.08 | 8.80E-01 | 1.00E+00 | -0.11 | 9.72E-01 | 9.97E-01 |
| HMBS       | -0.30 | 2.16E-01 | 1.00E+00 | 0.01  | 9.72E-01 | 9.97E-01 |
| ITPKA      | -1.68 | 1.45E-02 | 7.58E-01 | 0.04  | 9.72E-01 | 9.97E-01 |
| GSTA8P     | 1.53  | 2.07E-01 | 1.00E+00 | -0.04 | 9.72E-01 | 9.97E-01 |
| TCAF1P1    | -0.03 | 9.30E-01 | 1.00E+00 | -0.02 | 9.72E-01 | 9.97E-01 |
| CDC42BPG   | -0.25 | 4.85E-01 | 1.00E+00 | 0.03  | 9.72E-01 | 9.97E-01 |
| SNRPD1     | -0.07 | 7.19E-01 | 1.00E+00 | -0.01 | 9.72E-01 | 9.97E-01 |
| INSL3      | -2.52 | 2.76E-01 | 1.00E+00 | 0.05  | 9.72E-01 | 9.97E-01 |



|                   |       |          |          |       |          |          |
|-------------------|-------|----------|----------|-------|----------|----------|
| <b>MAP10</b>      | 0.86  | 4.68E-03 | 3.94E-01 | -0.02 | 9.72E-01 | 9.97E-01 |
| <b>AC007240.2</b> | -1.36 | 5.91E-01 | 1.00E+00 | -0.04 | 9.72E-01 | 9.97E-01 |
| <b>CPNE4</b>      | -1.81 | 4.23E-03 | 3.66E-01 | -0.05 | 9.73E-01 | 9.97E-01 |
| <b>EXOC7</b>      | -0.15 | 5.26E-01 | 1.00E+00 | -0.01 | 9.73E-01 | 9.97E-01 |
| <b>HMGCS1</b>     | -0.49 | 2.96E-01 | 1.00E+00 | -0.02 | 9.73E-01 | 9.97E-01 |
| <b>AC026401.3</b> | -0.30 | 3.45E-01 | 1.00E+00 | -0.02 | 9.73E-01 | 9.97E-01 |
| <b>MTF2</b>       | 0.08  | 7.31E-01 | 1.00E+00 | -0.01 | 9.73E-01 | 9.97E-01 |
| <b>ATP8B1</b>     | 0.17  | 3.83E-01 | 1.00E+00 | -0.01 | 9.73E-01 | 9.97E-01 |
| <b>AL590235.1</b> | 1.20  | 4.18E-01 | 1.00E+00 | -0.03 | 9.73E-01 | 9.97E-01 |
| <b>SLC2A4RG</b>   | -0.15 | 4.48E-01 | 1.00E+00 | -0.02 | 9.73E-01 | 9.97E-01 |
| <b>AC124947.1</b> | 1.03  | 4.15E-01 | 1.00E+00 | 0.03  | 9.73E-01 | 9.97E-01 |
| <b>PALM2</b>      | 0.43  | 6.41E-01 | 1.00E+00 | 0.03  | 9.73E-01 | 9.97E-01 |
| <b>TPBGL</b>      | -3.64 | 2.71E-04 | 6.07E-02 | -0.04 | 9.73E-01 | 9.97E-01 |
| <b>HID1</b>       | 0.07  | 9.00E-01 | 1.00E+00 | -0.01 | 9.73E-01 | 9.97E-01 |
| <b>AC004540.2</b> | -3.19 | 3.12E-02 | 1.00E+00 | -0.03 | 9.73E-01 | 9.97E-01 |
| <b>LURAP1L</b>    | -0.11 | 6.92E-01 | 1.00E+00 | -0.01 | 9.73E-01 | 9.97E-01 |
| <b>AC087045.2</b> | -0.54 | 8.29E-01 | 1.00E+00 | -0.04 | 9.73E-01 | 9.97E-01 |
| <b>SMG1P7</b>     | 0.71  | 5.17E-01 | 1.00E+00 | 0.04  | 9.73E-01 | 9.97E-01 |
| <b>LBHD2</b>      | 2.70  | 1.28E-01 | 1.00E+00 | -0.04 | 9.73E-01 | 9.97E-01 |
| <b>LINC01300</b>  | -0.05 | 9.54E-01 | 1.00E+00 | -0.03 | 9.73E-01 | 9.97E-01 |
| <b>SRSF5</b>      | -0.51 | 2.15E-01 | 1.00E+00 | 0.01  | 9.73E-01 | 9.97E-01 |
| <b>AMIGO1</b>     | 0.40  | 3.43E-01 | 1.00E+00 | 0.02  | 9.73E-01 | 9.97E-01 |
| <b>FAM71E1</b>    | -0.34 | 5.79E-01 | 1.00E+00 | 0.02  | 9.73E-01 | 9.97E-01 |
| <b>C1orf61</b>    | -6.38 | 5.98E-02 | 1.00E+00 | -0.04 | 9.73E-01 | 9.97E-01 |
| <b>LRFN1</b>      | -0.83 | 3.12E-02 | 1.00E+00 | -0.03 | 9.73E-01 | 9.97E-01 |
| <b>FAM50B</b>     | 0.10  | 6.74E-01 | 1.00E+00 | 0.01  | 9.73E-01 | 9.97E-01 |
| <b>GCGR</b>       | -0.52 | 5.72E-01 | 1.00E+00 | 0.04  | 9.73E-01 | 9.97E-01 |
| <b>NOS3</b>       | -0.15 | 6.88E-01 | 1.00E+00 | 0.03  | 9.73E-01 | 9.97E-01 |
| <b>ZNF107</b>     | -0.05 | 8.97E-01 | 1.00E+00 | 0.01  | 9.74E-01 | 9.97E-01 |
| <b>CENPI</b>      | 0.72  | 2.41E-01 | 1.00E+00 | 0.03  | 9.74E-01 | 9.97E-01 |
| <b>G19311</b>     | -2.84 | 3.76E-01 | 1.00E+00 | -0.04 | 9.74E-01 | 9.97E-01 |
| <b>HOXA1</b>      | -0.35 | 2.94E-01 | 1.00E+00 | -0.02 | 9.74E-01 | 9.97E-01 |

|            |       |          |          |       |          |          |
|------------|-------|----------|----------|-------|----------|----------|
| ETV6       | -0.22 | 3.05E-01 | 1.00E+00 | 0.01  | 9.74E-01 | 9.97E-01 |
| AC006329.1 | 0.19  | 7.43E-01 | 1.00E+00 | -0.02 | 9.74E-01 | 9.97E-01 |
| GAL3ST1    | -0.74 | 2.62E-01 | 1.00E+00 | -0.03 | 9.74E-01 | 9.97E-01 |
| AL049552.1 | 1.41  | 3.80E-01 | 1.00E+00 | -0.10 | 9.74E-01 | 9.97E-01 |
| RAB23      | -0.01 | 9.82E-01 | 1.00E+00 | 0.01  | 9.74E-01 | 9.97E-01 |
| EXOSC4     | 0.06  | 8.01E-01 | 1.00E+00 | -0.01 | 9.74E-01 | 9.97E-01 |
| TNXB       | 0.38  | 4.03E-01 | 1.00E+00 | 0.03  | 9.74E-01 | 9.97E-01 |
| APBB1      | -0.11 | 7.50E-01 | 1.00E+00 | 0.01  | 9.74E-01 | 9.97E-01 |
| AC106886.5 | 0.20  | 7.39E-01 | 1.00E+00 | 0.02  | 9.74E-01 | 9.97E-01 |
| AC010422.1 | 0.31  | 7.89E-01 | 1.00E+00 | -0.03 | 9.74E-01 | 9.97E-01 |
| KRTAP2-3   | -6.16 | 7.65E-02 | 1.00E+00 | -0.10 | 9.74E-01 | 9.97E-01 |
| LINC02159  | -5.67 | 2.80E-03 | 2.73E-01 | 0.10  | 9.74E-01 | 9.97E-01 |
| G41275     | -0.30 | 6.18E-01 | 1.00E+00 | 0.02  | 9.74E-01 | 9.97E-01 |
| ELAVL2     | -2.07 | 1.50E-02 | 7.62E-01 | 0.04  | 9.74E-01 | 9.97E-01 |
| LHX2       | -1.16 | 4.62E-01 | 1.00E+00 | -0.10 | 9.74E-01 | 9.97E-01 |
| AC027279.1 | -0.81 | 6.50E-01 | 1.00E+00 | 0.02  | 9.74E-01 | 9.97E-01 |
| KCNK7      | 0.15  | 7.58E-01 | 1.00E+00 | -0.02 | 9.74E-01 | 9.97E-01 |
| AC006213.6 | -2.09 | 1.61E-01 | 1.00E+00 | 0.04  | 9.74E-01 | 9.97E-01 |
| ALOX12     | -0.27 | 6.21E-01 | 1.00E+00 | -0.01 | 9.75E-01 | 9.97E-01 |
| TPK1       | 0.54  | 1.20E-01 | 1.00E+00 | 0.02  | 9.75E-01 | 9.97E-01 |
| AC138089.1 | -2.49 | 2.66E-01 | 1.00E+00 | 0.04  | 9.75E-01 | 9.97E-01 |
| YWHAQ      | -0.15 | 3.90E-01 | 1.00E+00 | -0.01 | 9.75E-01 | 9.97E-01 |
| LINC00278  | 0.27  | 8.39E-01 | 1.00E+00 | 0.07  | 9.75E-01 | 9.97E-01 |
| RBMXL1     | -0.06 | 7.82E-01 | 1.00E+00 | -0.01 | 9.75E-01 | 9.97E-01 |
| LCE2D      | 1.12  | 1.26E-01 | 1.00E+00 | 0.02  | 9.75E-01 | 9.97E-01 |
| AC007342.4 | 0.78  | 4.59E-01 | 1.00E+00 | 0.03  | 9.75E-01 | 9.97E-01 |
| LINC01589  | 1.27  | 3.55E-01 | 1.00E+00 | -0.04 | 9.75E-01 | 9.97E-01 |
| DDX111L10  | 0.67  | 6.78E-01 | 1.00E+00 | -0.03 | 9.75E-01 | 9.97E-01 |
| KRTAP10-10 | -6.29 | 7.06E-02 | 1.00E+00 | -0.10 | 9.75E-01 | 9.97E-01 |
| TMEM127    | -0.06 | 6.99E-01 | 1.00E+00 | -0.02 | 9.75E-01 | 9.97E-01 |
| TMPRSS5    | -0.67 | 3.86E-01 | 1.00E+00 | -0.02 | 9.75E-01 | 9.97E-01 |
| CSPG4P12   | -0.04 | 9.49E-01 | 1.00E+00 | 0.03  | 9.75E-01 | 9.97E-01 |

|                   |       |          |          |       |          |          |
|-------------------|-------|----------|----------|-------|----------|----------|
| <b>AGAP12P</b>    | -1.13 | 4.54E-01 | 1.00E+00 | -0.03 | 9.75E-01 | 9.97E-01 |
| <b>PLEKHG6</b>    | 0.12  | 6.64E-01 | 1.00E+00 | -0.02 | 9.75E-01 | 9.97E-01 |
| <b>HLA-DQB2</b>   | -1.25 | 1.45E-02 | 7.60E-01 | 0.02  | 9.75E-01 | 9.97E-01 |
| <b>GJB4</b>       | 0.30  | 6.04E-01 | 1.00E+00 | 0.02  | 9.75E-01 | 9.97E-01 |
| <b>PGM5P1</b>     | 0.60  | 5.79E-01 | 1.00E+00 | -0.02 | 9.75E-01 | 9.97E-01 |
| <b>INTS7</b>      | -0.06 | 8.39E-01 | 1.00E+00 | 0.01  | 9.75E-01 | 9.97E-01 |
| <b>MCM4</b>       | -0.37 | 1.55E-01 | 1.00E+00 | 0.01  | 9.75E-01 | 9.97E-01 |
| <b>ZMYM4</b>      | 0.29  | 4.31E-01 | 1.00E+00 | 0.01  | 9.75E-01 | 9.97E-01 |
| <b>STARD3NL</b>   | 0.72  | 5.60E-02 | 1.00E+00 | -0.01 | 9.75E-01 | 9.97E-01 |
| <b>AC004801.6</b> | -0.67 | 5.46E-01 | 1.00E+00 | 0.03  | 9.75E-01 | 9.97E-01 |
| <b>AC126474.1</b> | 1.20  | 2.83E-01 | 1.00E+00 | -0.03 | 9.75E-01 | 9.97E-01 |
| <b>ADAMTS1</b>    | -0.76 | 1.28E-01 | 1.00E+00 | -0.02 | 9.75E-01 | 9.97E-01 |
| <b>LINC00881</b>  | -1.26 | 7.16E-01 | 1.00E+00 | -0.07 | 9.76E-01 | 9.97E-01 |
| <b>NECTIN4</b>    | 0.19  | 6.31E-01 | 1.00E+00 | 0.01  | 9.76E-01 | 9.97E-01 |
| <b>CCDC40</b>     | -1.08 | 4.26E-02 | 1.00E+00 | 0.02  | 9.76E-01 | 9.97E-01 |
| <b>AL117332.1</b> | -1.07 | 8.03E-02 | 1.00E+00 | 0.02  | 9.76E-01 | 9.97E-01 |
| <b>AP000866.1</b> | 0.85  | 1.61E-01 | 1.00E+00 | -0.03 | 9.76E-01 | 9.97E-01 |
| <b>LINC01140</b>  | 1.38  | 1.73E-01 | 1.00E+00 | -0.02 | 9.76E-01 | 9.97E-01 |
| <b>MT-CO1</b>     | 0.06  | 8.92E-01 | 1.00E+00 | -0.02 | 9.76E-01 | 9.97E-01 |
| <b>GOLGB1</b>     | -0.37 | 1.25E-02 | 6.97E-01 | 0.01  | 9.76E-01 | 9.97E-01 |
| <b>AL137784.2</b> | 1.96  | 5.66E-01 | 1.00E+00 | 0.03  | 9.76E-01 | 9.97E-01 |
| <b>TACO1</b>      | -0.15 | 4.94E-01 | 1.00E+00 | -0.01 | 9.76E-01 | 9.97E-01 |
| <b>A2M</b>        | 0.01  | 9.89E-01 | 1.00E+00 | 0.02  | 9.76E-01 | 9.97E-01 |
| <b>ZNF800</b>     | -0.13 | 7.08E-01 | 1.00E+00 | -0.01 | 9.76E-01 | 9.97E-01 |
| <b>PPM1H</b>      | 0.28  | 6.53E-01 | 1.00E+00 | -0.02 | 9.76E-01 | 9.97E-01 |
| <b>AC011297.1</b> | -0.01 | 9.96E-01 | 1.00E+00 | 0.06  | 9.76E-01 | 9.97E-01 |
| <b>ATP6V0A1</b>   | 0.02  | 9.42E-01 | 1.00E+00 | 0.01  | 9.76E-01 | 9.97E-01 |
| <b>ASAP1-IT2</b>  | 0.73  | 5.63E-01 | 1.00E+00 | -0.02 | 9.76E-01 | 9.97E-01 |
| <b>KCNIP1</b>     | -0.25 | 6.94E-01 | 1.00E+00 | -0.06 | 9.76E-01 | 9.97E-01 |
| <b>MYO1H</b>      | 1.57  | 3.66E-01 | 1.00E+00 | 0.03  | 9.76E-01 | 9.97E-01 |
| <b>C7orf26</b>    | -0.16 | 4.30E-01 | 1.00E+00 | 0.01  | 9.76E-01 | 9.97E-01 |
| <b>LINC01395</b>  | -3.83 | 1.58E-02 | 7.86E-01 | -0.03 | 9.76E-01 | 9.97E-01 |

|                    |       |          |          |       |          |          |
|--------------------|-------|----------|----------|-------|----------|----------|
| <b>TMEM45A</b>     | 0.12  | 8.02E-01 | 1.00E+00 | 0.02  | 9.76E-01 | 9.97E-01 |
| <b>AGPS</b>        | 0.19  | 4.61E-01 | 1.00E+00 | 0.01  | 9.76E-01 | 9.97E-01 |
| <b>POMK</b>        | -0.14 | 7.02E-01 | 1.00E+00 | 0.01  | 9.76E-01 | 9.97E-01 |
| <b>SLCO4A1-AS1</b> | -0.21 | 7.14E-01 | 1.00E+00 | 0.02  | 9.76E-01 | 9.97E-01 |
| <b>NELFB</b>       | -0.20 | 3.71E-01 | 1.00E+00 | -0.02 | 9.76E-01 | 9.97E-01 |
| <b>AL137786.1</b>  | -0.19 | 9.08E-01 | 1.00E+00 | 0.04  | 9.77E-01 | 9.97E-01 |
| <b>TTC9</b>        | 0.25  | 5.29E-01 | 1.00E+00 | 0.02  | 9.77E-01 | 9.97E-01 |
| <b>MYOZ2</b>       | -1.35 | 4.17E-01 | 1.00E+00 | 0.09  | 9.77E-01 | 9.97E-01 |
| <b>MKNK2</b>       | 0.03  | 9.22E-01 | 1.00E+00 | -0.02 | 9.77E-01 | 9.97E-01 |
| <b>PABPC3</b>      | 0.26  | 8.61E-01 | 1.00E+00 | -0.02 | 9.77E-01 | 9.97E-01 |
| <b>FOSB</b>        | -2.67 | 5.02E-02 | 1.00E+00 | -0.02 | 9.77E-01 | 9.97E-01 |
| <b>C10orf25</b>    | 0.68  | 2.25E-01 | 1.00E+00 | 0.03  | 9.77E-01 | 9.97E-01 |
| <b>PLEKHA6</b>     | 0.41  | 4.44E-01 | 1.00E+00 | -0.02 | 9.77E-01 | 9.97E-01 |
| <b>ACKR1</b>       | -0.52 | 1.85E-01 | 1.00E+00 | 0.01  | 9.77E-01 | 9.97E-01 |
| <b>H6PD</b>        | -0.05 | 8.21E-01 | 1.00E+00 | 0.01  | 9.77E-01 | 9.97E-01 |
| <b>AL049555.1</b>  | -0.08 | 8.44E-01 | 1.00E+00 | 0.02  | 9.77E-01 | 9.97E-01 |
| <b>ITGB5</b>       | 0.07  | 7.66E-01 | 1.00E+00 | 0.01  | 9.77E-01 | 9.97E-01 |
| <b>AC008481.2</b>  | -0.23 | 8.44E-01 | 1.00E+00 | 0.04  | 9.77E-01 | 9.97E-01 |
| <b>POLR2F</b>      | -0.14 | 4.46E-01 | 1.00E+00 | 0.01  | 9.77E-01 | 9.97E-01 |
| <b>TSKS</b>        | 0.32  | 5.19E-01 | 1.00E+00 | -0.03 | 9.77E-01 | 9.97E-01 |
| <b>MRPL41</b>      | -0.28 | 2.12E-01 | 1.00E+00 | -0.01 | 9.77E-01 | 9.97E-01 |
| <b>ATP6AP1L</b>    | 0.32  | 5.64E-01 | 1.00E+00 | 0.01  | 9.77E-01 | 9.97E-01 |
| <b>CRCP</b>        | 0.09  | 6.85E-01 | 1.00E+00 | -0.01 | 9.77E-01 | 9.97E-01 |
| <b>CNOT10</b>      | 0.02  | 9.40E-01 | 1.00E+00 | 0.01  | 9.77E-01 | 9.97E-01 |
| <b>MT-ND1</b>      | 0.01  | 9.90E-01 | 1.00E+00 | 0.01  | 9.77E-01 | 9.97E-01 |
| <b>KLHDC8B</b>     | 0.41  | 7.28E-02 | 1.00E+00 | 0.01  | 9.77E-01 | 9.97E-01 |
| <b>AL133485.2</b>  | -1.91 | 4.70E-01 | 1.00E+00 | 0.04  | 9.77E-01 | 9.97E-01 |
| <b>SERPINB6</b>    | -0.12 | 7.39E-01 | 1.00E+00 | 0.01  | 9.77E-01 | 9.97E-01 |
| <b>XLOC_005369</b> | 0.83  | 6.86E-01 | 1.00E+00 | -0.03 | 9.77E-01 | 9.97E-01 |
| <b>AL033384.1</b>  | -0.07 | 8.97E-01 | 1.00E+00 | -0.02 | 9.77E-01 | 9.97E-01 |
| <b>PTGES2</b>      | -0.06 | 8.07E-01 | 1.00E+00 | -0.02 | 9.77E-01 | 9.97E-01 |
| <b>ZNF304</b>      | 0.14  | 5.27E-01 | 1.00E+00 | -0.01 | 9.77E-01 | 9.97E-01 |

|             |       |          |          |       |          |          |
|-------------|-------|----------|----------|-------|----------|----------|
| GABRG3      | -0.34 | 7.47E-01 | 1.00E+00 | -0.03 | 9.78E-01 | 9.97E-01 |
| ANKRD50     | -0.45 | 6.15E-02 | 1.00E+00 | -0.01 | 9.78E-01 | 9.97E-01 |
| AL023881.1  | -2.22 | 1.98E-01 | 1.00E+00 | 0.04  | 9.78E-01 | 9.97E-01 |
| METTL8      | -0.37 | 1.95E-01 | 1.00E+00 | -0.01 | 9.78E-01 | 9.97E-01 |
| AL391834.2  | -0.05 | 9.52E-01 | 1.00E+00 | 0.01  | 9.78E-01 | 9.97E-01 |
| AC012360.3  | -0.69 | 2.14E-01 | 1.00E+00 | 0.02  | 9.78E-01 | 9.97E-01 |
| TM2D2       | 0.24  | 3.02E-01 | 1.00E+00 | 0.01  | 9.78E-01 | 9.97E-01 |
| PDE8A       | 0.03  | 9.16E-01 | 1.00E+00 | -0.01 | 9.78E-01 | 9.97E-01 |
| AC079250.1  | -0.26 | 6.18E-01 | 1.00E+00 | -0.02 | 9.78E-01 | 9.97E-01 |
| PGGT1B      | 0.00  | 9.91E-01 | 1.00E+00 | 0.01  | 9.78E-01 | 9.97E-01 |
| EPHA4       | -0.36 | 1.48E-01 | 1.00E+00 | -0.01 | 9.78E-01 | 9.97E-01 |
| ADORA2BP1   | 0.55  | 5.85E-01 | 1.00E+00 | -0.03 | 9.78E-01 | 9.97E-01 |
| AC083880.1  | -0.14 | 9.08E-01 | 1.00E+00 | -0.02 | 9.78E-01 | 9.97E-01 |
| ISOC2       | -0.37 | 1.83E-01 | 1.00E+00 | 0.01  | 9.78E-01 | 9.97E-01 |
| HMGA1P4     | -0.37 | 7.30E-01 | 1.00E+00 | -0.02 | 9.78E-01 | 9.97E-01 |
| AC116312.1  | 0.69  | 6.73E-01 | 1.00E+00 | 0.02  | 9.78E-01 | 9.97E-01 |
| KLHL17      | -0.41 | 3.56E-01 | 1.00E+00 | 0.02  | 9.78E-01 | 9.97E-01 |
| KRTAP1-1    | -1.14 | 7.40E-01 | 1.00E+00 | -0.09 | 9.78E-01 | 9.97E-01 |
| ADAM15      | -0.11 | 5.42E-01 | 1.00E+00 | -0.01 | 9.78E-01 | 9.97E-01 |
| CMAS        | 0.05  | 8.69E-01 | 1.00E+00 | -0.01 | 9.78E-01 | 9.97E-01 |
| FIP1L1      | 0.05  | 8.38E-01 | 1.00E+00 | 0.01  | 9.79E-01 | 9.97E-01 |
| ENOX2       | 0.04  | 8.42E-01 | 1.00E+00 | 0.01  | 9.79E-01 | 9.97E-01 |
| ARVCF       | -0.26 | 3.44E-01 | 1.00E+00 | -0.02 | 9.79E-01 | 9.97E-01 |
| BCLAF1      | -0.40 | 1.01E-01 | 1.00E+00 | 0.01  | 9.79E-01 | 9.97E-01 |
| MRPL49      | 0.17  | 3.39E-01 | 1.00E+00 | 0.00  | 9.79E-01 | 9.97E-01 |
| HSD17B7P2   | -0.04 | 9.73E-01 | 1.00E+00 | 0.01  | 9.79E-01 | 9.97E-01 |
| SNRK        | 0.00  | 9.99E-01 | 1.00E+00 | 0.01  | 9.79E-01 | 9.97E-01 |
| AC005014.3  | -1.00 | 2.78E-01 | 1.00E+00 | 0.02  | 9.79E-01 | 9.97E-01 |
| GAS2        | -0.29 | 6.90E-01 | 1.00E+00 | 0.01  | 9.79E-01 | 9.97E-01 |
| LIN7B       | 0.29  | 5.99E-01 | 1.00E+00 | -0.01 | 9.79E-01 | 9.97E-01 |
| FIGN        | 0.88  | 8.50E-02 | 1.00E+00 | 0.02  | 9.79E-01 | 9.97E-01 |
| XLOC_002561 | -0.46 | 4.27E-01 | 1.00E+00 | 0.02  | 9.79E-01 | 9.97E-01 |

|             |        |          |          |       |          |          |
|-------------|--------|----------|----------|-------|----------|----------|
| CYFIP1      | -0.13  | 4.75E-01 | 1.00E+00 | 0.01  | 9.79E-01 | 9.97E-01 |
| TEK         | 0.26   | 6.21E-01 | 1.00E+00 | 0.01  | 9.79E-01 | 9.97E-01 |
| G40091      | -30.00 | 3.42E-18 | 5.54E-15 | -0.08 | 9.79E-01 | 9.97E-01 |
| HMG1P7      | -2.81  | 1.27E-01 | 1.00E+00 | 0.03  | 9.79E-01 | 9.97E-01 |
| AC108718.1  | -0.76  | 2.33E-01 | 1.00E+00 | 0.02  | 9.80E-01 | 9.97E-01 |
| SNORA11     | -1.33  | 3.47E-01 | 1.00E+00 | 0.02  | 9.80E-01 | 9.97E-01 |
| AL357033.1  | 0.20   | 7.11E-01 | 1.00E+00 | 0.02  | 9.80E-01 | 9.97E-01 |
| KDM5B       | -0.02  | 9.38E-01 | 1.00E+00 | -0.01 | 9.80E-01 | 9.97E-01 |
| CKAP2       | -0.06  | 8.27E-01 | 1.00E+00 | 0.01  | 9.80E-01 | 9.97E-01 |
| LSM3P3      | NA     | NA       | NA       | 0.03  | 9.80E-01 | 9.97E-01 |
| VAMP2       | -0.14  | 5.82E-01 | 1.00E+00 | 0.01  | 9.80E-01 | 9.97E-01 |
| LINC01058   | 0.43   | 5.55E-01 | 1.00E+00 | 0.02  | 9.80E-01 | 9.97E-01 |
| AC002546.1  | 3.00   | 1.03E-02 | 6.31E-01 | -0.08 | 9.80E-01 | 9.97E-01 |
| GNL2        | -0.02  | 9.16E-01 | 1.00E+00 | 0.01  | 9.80E-01 | 9.97E-01 |
| AF165147.1  | -1.62  | 7.65E-02 | 1.00E+00 | -0.02 | 9.80E-01 | 9.97E-01 |
| SKA2        | 0.01   | 9.67E-01 | 1.00E+00 | 0.00  | 9.80E-01 | 9.97E-01 |
| ADAMTS9-AS2 | -0.49  | 2.73E-01 | 1.00E+00 | 0.01  | 9.80E-01 | 9.97E-01 |
| LINC00294   | -0.01  | 9.88E-01 | 1.00E+00 | -0.01 | 9.80E-01 | 9.97E-01 |
| LINC02178   | -0.08  | 9.37E-01 | 1.00E+00 | -0.02 | 9.80E-01 | 9.97E-01 |
| FAM71D      | -2.17  | 4.21E-01 | 1.00E+00 | 0.02  | 9.80E-01 | 9.97E-01 |
| G38514      | 1.23   | 3.97E-02 | 1.00E+00 | 0.02  | 9.80E-01 | 9.97E-01 |
| DCP2        | 0.50   | 6.89E-02 | 1.00E+00 | 0.01  | 9.81E-01 | 9.97E-01 |
| XLOC_010457 | -3.00  | 1.89E-01 | 1.00E+00 | -0.04 | 9.81E-01 | 9.97E-01 |
| GLUD1P3     | -1.39  | 2.13E-03 | 2.39E-01 | -0.01 | 9.81E-01 | 9.97E-01 |
| TRIR        | 0.02   | 9.04E-01 | 1.00E+00 | -0.02 | 9.81E-01 | 9.97E-01 |
| RSBN1       | 0.04   | 8.04E-01 | 1.00E+00 | -0.01 | 9.81E-01 | 9.97E-01 |
| COQ8B       | -0.15  | 2.92E-01 | 1.00E+00 | 0.01  | 9.81E-01 | 9.97E-01 |
| TRIM65      | -0.13  | 4.76E-01 | 1.00E+00 | 0.01  | 9.81E-01 | 9.97E-01 |
| EYA1        | 0.47   | 7.09E-01 | 1.00E+00 | -0.02 | 9.81E-01 | 9.97E-01 |
| ATOH8       | 0.78   | 5.28E-02 | 1.00E+00 | -0.02 | 9.81E-01 | 9.97E-01 |
| DINOL       | -3.78  | 1.69E-01 | 1.00E+00 | -0.03 | 9.81E-01 | 9.97E-01 |
| TM4SF18     | 0.04   | 9.48E-01 | 1.00E+00 | 0.01  | 9.81E-01 | 9.97E-01 |

|             |       |          |          |       |          |          |
|-------------|-------|----------|----------|-------|----------|----------|
| FAM83E      | -0.03 | 9.62E-01 | 1.00E+00 | -0.07 | 9.81E-01 | 9.97E-01 |
| TCEAL2      | -0.18 | 7.43E-01 | 1.00E+00 | -0.01 | 9.81E-01 | 9.97E-01 |
| DDR2        | 0.89  | 1.73E-01 | 1.00E+00 | 0.01  | 9.81E-01 | 9.97E-01 |
| ELFN1-AS1   | 0.90  | 7.96E-01 | 1.00E+00 | 0.05  | 9.81E-01 | 9.97E-01 |
| RPS26P15    | 1.13  | 5.94E-01 | 1.00E+00 | -0.02 | 9.81E-01 | 9.97E-01 |
| CHTF18      | -0.25 | 3.98E-01 | 1.00E+00 | 0.01  | 9.81E-01 | 9.97E-01 |
| XLOC_008694 | -0.12 | 8.22E-01 | 1.00E+00 | 0.01  | 9.81E-01 | 9.97E-01 |
| ZFP1        | 0.05  | 8.64E-01 | 1.00E+00 | 0.01  | 9.81E-01 | 9.97E-01 |
| JDP2        | 0.00  | 9.91E-01 | 1.00E+00 | 0.01  | 9.82E-01 | 9.97E-01 |
| STX17       | 0.09  | 7.54E-01 | 1.00E+00 | 0.00  | 9.82E-01 | 9.97E-01 |
| DUSP8P5     | -0.76 | 8.84E-02 | 1.00E+00 | 0.03  | 9.82E-01 | 9.97E-01 |
| ZNF280C     | 0.01  | 9.84E-01 | 1.00E+00 | -0.01 | 9.82E-01 | 9.97E-01 |
| AC103974.1  | 0.04  | 9.51E-01 | 1.00E+00 | -0.02 | 9.82E-01 | 9.97E-01 |
| FOXRED1     | -0.14 | 5.39E-01 | 1.00E+00 | 0.00  | 9.82E-01 | 9.97E-01 |
| SCN4A       | 1.58  | 1.25E-01 | 1.00E+00 | -0.02 | 9.82E-01 | 9.97E-01 |
| RAD23A      | 0.02  | 9.02E-01 | 1.00E+00 | 0.00  | 9.82E-01 | 9.97E-01 |
| KIAA0100    | 0.16  | 4.32E-01 | 1.00E+00 | 0.02  | 9.82E-01 | 9.97E-01 |
| TGM4        | -1.95 | 2.00E-01 | 1.00E+00 | -0.02 | 9.82E-01 | 9.97E-01 |
| BTG2        | -0.84 | 1.89E-01 | 1.00E+00 | -0.01 | 9.82E-01 | 9.97E-01 |
| KRT82       | -7.78 | 9.90E-04 | 1.63E-01 | 0.04  | 9.82E-01 | 9.97E-01 |
| SDHC        | 0.05  | 7.37E-01 | 1.00E+00 | -0.01 | 9.82E-01 | 9.97E-01 |
| LINC02066   | -0.54 | 7.41E-01 | 1.00E+00 | -0.03 | 9.82E-01 | 9.97E-01 |
| PQLC1       | -0.03 | 8.85E-01 | 1.00E+00 | 0.01  | 9.82E-01 | 9.97E-01 |
| TNFRSF11A   | -0.02 | 9.50E-01 | 1.00E+00 | 0.01  | 9.82E-01 | 9.97E-01 |
| XLOC_004822 | 2.29  | 1.10E-01 | 1.00E+00 | -0.02 | 9.82E-01 | 9.97E-01 |
| SYP         | -1.07 | 5.94E-02 | 1.00E+00 | -0.02 | 9.82E-01 | 9.97E-01 |
| PCDHGA7     | -0.51 | 2.12E-01 | 1.00E+00 | -0.02 | 9.82E-01 | 9.97E-01 |
| AC068888.2  | 1.78  | 1.41E-02 | 7.48E-01 | 0.02  | 9.82E-01 | 9.97E-01 |
| CASKIN1     | -1.57 | 3.07E-04 | 6.69E-02 | -0.07 | 9.82E-01 | 9.97E-01 |
| MRPL32      | 0.30  | 1.24E-01 | 1.00E+00 | 0.01  | 9.82E-01 | 9.97E-01 |
| GRK3        | 1.08  | 5.23E-02 | 1.00E+00 | -0.01 | 9.82E-01 | 9.97E-01 |
| AL158071.2  | 1.52  | 4.89E-01 | 1.00E+00 | -0.03 | 9.83E-01 | 9.97E-01 |

|            |       |          |          |       |          |          |
|------------|-------|----------|----------|-------|----------|----------|
| TRAPPC10   | -0.27 | 2.21E-01 | 1.00E+00 | -0.01 | 9.83E-01 | 9.97E-01 |
| ALDH16A1   | -0.13 | 5.37E-01 | 1.00E+00 | -0.01 | 9.83E-01 | 9.97E-01 |
| G2899      | 1.01  | 1.60E-01 | 1.00E+00 | -0.02 | 9.83E-01 | 9.97E-01 |
| CIAO3      | 0.21  | 2.99E-01 | 1.00E+00 | -0.01 | 9.83E-01 | 9.97E-01 |
| HNRNPK     | 0.07  | 6.66E-01 | 1.00E+00 | 0.00  | 9.83E-01 | 9.97E-01 |
| GTF2IP13   | -0.67 | 4.29E-01 | 1.00E+00 | -0.02 | 9.83E-01 | 9.97E-01 |
| ADRA1A     | 0.58  | 4.82E-01 | 1.00E+00 | -0.02 | 9.83E-01 | 9.97E-01 |
| AL133370.1 | -0.87 | 6.39E-01 | 1.00E+00 | 0.03  | 9.83E-01 | 9.97E-01 |
| CTU1       | -0.17 | 5.65E-01 | 1.00E+00 | -0.02 | 9.83E-01 | 9.97E-01 |
| ACTG1P17   | -1.43 | 6.74E-01 | 1.00E+00 | -0.02 | 9.83E-01 | 9.97E-01 |
| OCLNP1     | -0.14 | 9.38E-01 | 1.00E+00 | -0.02 | 9.83E-01 | 9.97E-01 |
| ZNF558     | -0.01 | 9.76E-01 | 1.00E+00 | 0.01  | 9.83E-01 | 9.97E-01 |
| C1orf112   | -0.15 | 6.50E-01 | 1.00E+00 | -0.01 | 9.83E-01 | 9.97E-01 |
| PRIM2      | 0.23  | 5.10E-01 | 1.00E+00 | -0.01 | 9.83E-01 | 9.97E-01 |
| VRK2       | -0.14 | 6.27E-01 | 1.00E+00 | 0.00  | 9.83E-01 | 9.97E-01 |
| PLAGL1     | 0.22  | 4.99E-01 | 1.00E+00 | 0.01  | 9.83E-01 | 9.97E-01 |
| CAPN10-DT  | 0.37  | 4.88E-01 | 1.00E+00 | -0.02 | 9.83E-01 | 9.97E-01 |
| AL603840.1 | -0.47 | 3.50E-01 | 1.00E+00 | 0.01  | 9.83E-01 | 9.97E-01 |
| LINC01347  | -0.80 | 4.89E-01 | 1.00E+00 | -0.02 | 9.83E-01 | 9.97E-01 |
| AC006026.3 | 0.98  | 3.16E-01 | 1.00E+00 | 0.02  | 9.83E-01 | 9.97E-01 |
| KCNQ1OT1   | -0.17 | 7.46E-01 | 1.00E+00 | -0.01 | 9.83E-01 | 9.97E-01 |
| ZNF883     | 1.74  | 9.47E-03 | 6.06E-01 | -0.04 | 9.83E-01 | 9.97E-01 |
| ZNF100     | 0.64  | 1.05E-01 | 1.00E+00 | 0.01  | 9.83E-01 | 9.97E-01 |
| DCT        | 0.15  | 7.69E-01 | 1.00E+00 | -0.02 | 9.83E-01 | 9.97E-01 |
| LITAF      | 0.21  | 3.86E-01 | 1.00E+00 | 0.00  | 9.83E-01 | 9.97E-01 |
| FOXRED2    | -0.42 | 1.07E-01 | 1.00E+00 | 0.01  | 9.84E-01 | 9.97E-01 |
| AL021807.1 | -1.88 | 2.17E-01 | 1.00E+00 | -0.03 | 9.84E-01 | 9.97E-01 |
| LRMDA      | 0.36  | 5.20E-01 | 1.00E+00 | 0.01  | 9.84E-01 | 9.97E-01 |
| RELCH      | -0.07 | 8.44E-01 | 1.00E+00 | -0.01 | 9.84E-01 | 9.97E-01 |
| EPS8       | 0.21  | 5.79E-01 | 1.00E+00 | 0.01  | 9.84E-01 | 9.97E-01 |
| RORB       | 0.90  | 2.16E-01 | 1.00E+00 | 0.01  | 9.84E-01 | 9.97E-01 |
| AC092117.1 | -0.35 | 5.78E-01 | 1.00E+00 | 0.02  | 9.84E-01 | 9.97E-01 |



|                    |       |          |          |       |          |          |
|--------------------|-------|----------|----------|-------|----------|----------|
| <b>AL079342.1</b>  | 0.56  | 8.71E-01 | 1.00E+00 | 0.02  | 9.84E-01 | 9.97E-01 |
| <b>MMRN2</b>       | 0.01  | 9.80E-01 | 1.00E+00 | 0.01  | 9.84E-01 | 9.97E-01 |
| <b>GUCY2C</b>      | -0.09 | 8.74E-01 | 1.00E+00 | -0.01 | 9.84E-01 | 9.97E-01 |
| <b>SUPT7L</b>      | -0.19 | 3.92E-01 | 1.00E+00 | 0.00  | 9.84E-01 | 9.97E-01 |
| <b>TMEM130</b>     | -2.29 | 2.53E-02 | 9.29E-01 | 0.02  | 9.84E-01 | 9.97E-01 |
| <b>CEP41</b>       | 0.20  | 4.82E-01 | 1.00E+00 | -0.01 | 9.84E-01 | 9.97E-01 |
| <b>MBTPS2</b>      | 0.10  | 6.92E-01 | 1.00E+00 | 0.00  | 9.84E-01 | 9.97E-01 |
| <b>AL157893.1</b>  | 0.89  | 3.97E-02 | 1.00E+00 | 0.02  | 9.84E-01 | 9.97E-01 |
| <b>PRPF40B</b>     | -0.53 | 4.35E-02 | 1.00E+00 | 0.01  | 9.84E-01 | 9.97E-01 |
| <b>KBTBD2</b>      | -0.04 | 8.45E-01 | 1.00E+00 | 0.01  | 9.84E-01 | 9.97E-01 |
| <b>ORMDL2</b>      | 0.24  | 3.20E-01 | 1.00E+00 | 0.01  | 9.84E-01 | 9.97E-01 |
| <b>USP6</b>        | -0.05 | 9.64E-01 | 1.00E+00 | -0.02 | 9.84E-01 | 9.97E-01 |
| <b>RARS</b>        | 0.10  | 6.07E-01 | 1.00E+00 | 0.00  | 9.84E-01 | 9.97E-01 |
| <b>AP000936.3</b>  | 1.36  | 3.42E-01 | 1.00E+00 | -0.02 | 9.84E-01 | 9.97E-01 |
| <b>ZNF536</b>      | 0.25  | 7.02E-01 | 1.00E+00 | -0.02 | 9.84E-01 | 9.97E-01 |
| <b>AC005034.5</b>  | -0.92 | 3.29E-01 | 1.00E+00 | -0.02 | 9.84E-01 | 9.97E-01 |
| <b>TTC8</b>        | -0.07 | 7.36E-01 | 1.00E+00 | -0.01 | 9.84E-01 | 9.97E-01 |
| <b>BREA2</b>       | 1.65  | 1.38E-01 | 1.00E+00 | 0.02  | 9.84E-01 | 9.97E-01 |
| <b>LINC02458</b>   | 0.77  | 7.11E-01 | 1.00E+00 | -0.04 | 9.84E-01 | 9.97E-01 |
| <b>HBG1</b>        | 0.00  | 1.00E+00 | NA       | 0.06  | 9.84E-01 | 9.97E-01 |
| <b>IGF2BP2-AS1</b> | -0.08 | 9.82E-01 | 1.00E+00 | 0.06  | 9.84E-01 | 9.97E-01 |
| <b>AC069148.1</b>  | -0.16 | 9.23E-01 | 1.00E+00 | -0.02 | 9.84E-01 | 9.97E-01 |
| <b>SLC35F3</b>     | 0.06  | 9.35E-01 | 1.00E+00 | 0.05  | 9.84E-01 | 9.97E-01 |
| <b>PCLAF</b>       | 0.06  | 8.87E-01 | 1.00E+00 | 0.01  | 9.84E-01 | 9.97E-01 |
| <b>PCDHB7</b>      | 0.09  | 8.73E-01 | 1.00E+00 | 0.01  | 9.85E-01 | 9.98E-01 |
| <b>PHF8</b>        | 0.10  | 6.33E-01 | 1.00E+00 | -0.01 | 9.85E-01 | 9.98E-01 |
| <b>RECQL</b>       | -0.20 | 3.75E-01 | 1.00E+00 | 0.00  | 9.85E-01 | 9.98E-01 |
| <b>UQCRHL</b>      | -0.57 | 4.49E-01 | 1.00E+00 | 0.01  | 9.85E-01 | 9.98E-01 |
| <b>GIPC1</b>       | 0.00  | 9.92E-01 | 1.00E+00 | 0.01  | 9.85E-01 | 9.98E-01 |
| <b>CFAP54</b>      | 0.55  | 6.52E-01 | 1.00E+00 | -0.05 | 9.85E-01 | 9.98E-01 |
| <b>KRT84</b>       | -2.46 | 1.98E-01 | 1.00E+00 | 0.02  | 9.85E-01 | 9.98E-01 |
| <b>USP4</b>        | 0.08  | 6.63E-01 | 1.00E+00 | 0.00  | 9.85E-01 | 9.98E-01 |

|                   |       |          |          |       |          |          |
|-------------------|-------|----------|----------|-------|----------|----------|
| <b>AP005432.2</b> | -0.51 | 5.57E-01 | 1.00E+00 | -0.02 | 9.85E-01 | 9.98E-01 |
| <b>HIVEP3</b>     | -0.45 | 1.11E-01 | 1.00E+00 | -0.01 | 9.85E-01 | 9.98E-01 |
| <b>AC055813.1</b> | -2.66 | 3.12E-01 | 1.00E+00 | 0.02  | 9.85E-01 | 9.98E-01 |
| <b>UQCC1</b>      | -0.21 | 2.91E-01 | 1.00E+00 | 0.00  | 9.85E-01 | 9.98E-01 |
| <b>CLIC5</b>      | 0.13  | 8.37E-01 | 1.00E+00 | 0.01  | 9.85E-01 | 9.98E-01 |
| <b>RNASEH2CP1</b> | 0.65  | 4.45E-01 | 1.00E+00 | 0.06  | 9.85E-01 | 9.98E-01 |
| <b>KCNG3</b>      | -1.64 | 3.86E-02 | 1.00E+00 | -0.02 | 9.85E-01 | 9.98E-01 |
| <b>CROT</b>       | -0.01 | 9.51E-01 | 1.00E+00 | -0.01 | 9.85E-01 | 9.98E-01 |
| <b>SLMAP</b>      | -0.16 | 4.99E-01 | 1.00E+00 | 0.00  | 9.86E-01 | 9.98E-01 |
| <b>VSIG10L</b>    | -0.34 | 2.38E-01 | 1.00E+00 | 0.01  | 9.86E-01 | 9.98E-01 |
| <b>LINC00343</b>  | 1.54  | 6.52E-01 | 1.00E+00 | -0.03 | 9.86E-01 | 9.98E-01 |
| <b>RETREG2</b>    | -0.01 | 9.73E-01 | 1.00E+00 | 0.01  | 9.86E-01 | 9.98E-01 |
| <b>NRBP2</b>      | -0.22 | 4.54E-01 | 1.00E+00 | -0.01 | 9.86E-01 | 9.98E-01 |
| <b>ART5</b>       | 0.82  | 2.51E-01 | 1.00E+00 | -0.02 | 9.86E-01 | 9.98E-01 |
| <b>GCK</b>        | -0.37 | 4.75E-01 | 1.00E+00 | -0.01 | 9.86E-01 | 9.98E-01 |
| <b>AL049870.3</b> | -0.10 | 9.47E-01 | 1.00E+00 | 0.02  | 9.86E-01 | 9.98E-01 |
| <b>LINC01354</b>  | -0.12 | 9.13E-01 | 1.00E+00 | -0.02 | 9.86E-01 | 9.98E-01 |
| <b>AC012254.5</b> | -0.52 | 8.80E-01 | 1.00E+00 | -0.06 | 9.86E-01 | 9.98E-01 |
| <b>ACTG1P20</b>   | -1.76 | 5.51E-01 | 1.00E+00 | -0.01 | 9.86E-01 | 9.98E-01 |
| <b>ACTB</b>       | -0.47 | 2.51E-02 | 9.28E-01 | 0.00  | 9.86E-01 | 9.98E-01 |
| <b>AC005682.1</b> | -0.39 | 2.89E-01 | 1.00E+00 | -0.02 | 9.86E-01 | 9.98E-01 |
| <b>PFAS</b>       | 0.13  | 7.42E-01 | 1.00E+00 | -0.01 | 9.86E-01 | 9.98E-01 |
| <b>IFT20</b>      | 0.09  | 6.95E-01 | 1.00E+00 | -0.01 | 9.86E-01 | 9.98E-01 |
| <b>PPFIA2</b>     | -0.63 | 4.33E-01 | 1.00E+00 | -0.01 | 9.86E-01 | 9.98E-01 |
| <b>IL22RA2</b>    | -0.36 | 6.46E-01 | 1.00E+00 | 0.02  | 9.86E-01 | 9.98E-01 |
| <b>KCNN1</b>      | -0.38 | 6.09E-01 | 1.00E+00 | -0.02 | 9.86E-01 | 9.98E-01 |
| <b>PRPF18</b>     | 0.01  | 9.76E-01 | 1.00E+00 | 0.00  | 9.86E-01 | 9.98E-01 |
| <b>ALOX12-AS1</b> | -0.93 | 8.37E-02 | 1.00E+00 | 0.01  | 9.86E-01 | 9.98E-01 |
| <b>CTDSPL2</b>    | 0.12  | 5.56E-01 | 1.00E+00 | 0.00  | 9.87E-01 | 9.98E-01 |
| <b>MAGI1</b>      | 0.13  | 4.94E-01 | 1.00E+00 | 0.01  | 9.87E-01 | 9.98E-01 |
| <b>ACHE</b>       | -0.23 | 6.24E-01 | 1.00E+00 | -0.04 | 9.87E-01 | 9.98E-01 |
| <b>ZNF518B</b>    | 0.20  | 3.72E-01 | 1.00E+00 | 0.00  | 9.87E-01 | 9.98E-01 |

|                    |       |          |          |       |          |          |
|--------------------|-------|----------|----------|-------|----------|----------|
| <b>CDCP1</b>       | -0.18 | 5.86E-01 | 1.00E+00 | -0.01 | 9.87E-01 | 9.98E-01 |
| <b>KLHL25</b>      | 0.00  | 9.94E-01 | 1.00E+00 | 0.01  | 9.87E-01 | 9.98E-01 |
| <b>SNHG8</b>       | 0.18  | 5.56E-01 | 1.00E+00 | -0.01 | 9.87E-01 | 9.98E-01 |
| <b>AAGAB</b>       | 0.09  | 5.54E-01 | 1.00E+00 | 0.00  | 9.87E-01 | 9.98E-01 |
| <b>KCTD20</b>      | 0.30  | 1.74E-01 | 1.00E+00 | 0.00  | 9.87E-01 | 9.98E-01 |
| <b>NKD1</b>        | 0.04  | 9.42E-01 | 1.00E+00 | 0.01  | 9.87E-01 | 9.98E-01 |
| <b>KDF1</b>        | 0.01  | 9.77E-01 | 1.00E+00 | 0.01  | 9.87E-01 | 9.98E-01 |
| <b>AC012313.6</b>  | 0.39  | 5.27E-01 | 1.00E+00 | -0.01 | 9.87E-01 | 9.98E-01 |
| <b>AL031673.1</b>  | -2.48 | 3.85E-02 | 1.00E+00 | -0.02 | 9.87E-01 | 9.98E-01 |
| <b>GS1-24F4.2</b>  | -0.07 | 9.56E-01 | 1.00E+00 | -0.02 | 9.87E-01 | 9.98E-01 |
| <b>PLEKHG4</b>     | -0.45 | 1.87E-01 | 1.00E+00 | 0.01  | 9.87E-01 | 9.98E-01 |
| <b>ZNF285B</b>     | -1.18 | 6.01E-01 | 1.00E+00 | -0.02 | 9.87E-01 | 9.98E-01 |
| <b>AL031123.3</b>  | -1.30 | 1.54E-01 | 1.00E+00 | -0.02 | 9.87E-01 | 9.98E-01 |
| <b>LRCH3</b>       | 0.09  | 6.92E-01 | 1.00E+00 | 0.01  | 9.87E-01 | 9.98E-01 |
| <b>AP000866.4</b>  | 0.50  | 5.35E-01 | 1.00E+00 | -0.02 | 9.87E-01 | 9.98E-01 |
| <b>COPS5</b>       | 0.13  | 4.90E-01 | 1.00E+00 | 0.00  | 9.88E-01 | 9.98E-01 |
| <b>SLC1A1</b>      | 0.05  | 9.34E-01 | 1.00E+00 | 0.01  | 9.88E-01 | 9.98E-01 |
| <b>CCDC36</b>      | -0.21 | 8.19E-01 | 1.00E+00 | 0.01  | 9.88E-01 | 9.98E-01 |
| <b>G40216</b>      | 0.72  | 4.45E-01 | 1.00E+00 | 0.02  | 9.88E-01 | 9.98E-01 |
| <b>AC138932.1</b>  | -0.73 | 1.94E-01 | 1.00E+00 | -0.05 | 9.88E-01 | 9.98E-01 |
| <b>YBEY</b>        | 0.03  | 9.26E-01 | 1.00E+00 | 0.00  | 9.88E-01 | 9.98E-01 |
| <b>CTXND1</b>      | -0.32 | 4.39E-01 | 1.00E+00 | 0.01  | 9.88E-01 | 9.98E-01 |
| <b>USP19</b>       | -0.06 | 7.20E-01 | 1.00E+00 | 0.01  | 9.88E-01 | 9.98E-01 |
| <b>RPL35P2</b>     | -1.05 | 1.88E-01 | 1.00E+00 | 0.01  | 9.88E-01 | 9.98E-01 |
| <b>DYNLL1P1</b>    | -2.16 | 2.58E-01 | 1.00E+00 | -0.01 | 9.88E-01 | 9.98E-01 |
| <b>PRR9</b>        | -4.26 | 1.98E-01 | 1.00E+00 | 0.05  | 9.88E-01 | 9.98E-01 |
| <b>AL353583.1</b>  | -2.35 | 2.09E-01 | 1.00E+00 | -0.01 | 9.88E-01 | 9.98E-01 |
| <b>XLOC_002030</b> | -1.55 | 1.15E-01 | 1.00E+00 | 0.01  | 9.88E-01 | 9.98E-01 |
| <b>G36985</b>      | -3.02 | 1.65E-01 | 1.00E+00 | 0.01  | 9.88E-01 | 9.98E-01 |
| <b>ARSD</b>        | -0.52 | 3.20E-02 | 1.00E+00 | 0.00  | 9.88E-01 | 9.98E-01 |
| <b>AC012085.2</b>  | 0.08  | 9.56E-01 | 1.00E+00 | -0.03 | 9.88E-01 | 9.98E-01 |
| <b>PMFBP1</b>      | -0.69 | 3.45E-01 | 1.00E+00 | -0.01 | 9.88E-01 | 9.98E-01 |

|                    |       |          |          |       |          |          |
|--------------------|-------|----------|----------|-------|----------|----------|
| <b>AC002451.1</b>  | 0.87  | 4.98E-01 | 1.00E+00 | 0.01  | 9.88E-01 | 9.98E-01 |
| <b>CLMP</b>        | 1.27  | 4.09E-02 | 1.00E+00 | -0.01 | 9.88E-01 | 9.98E-01 |
| <b>TADA2B</b>      | -0.05 | 7.20E-01 | 1.00E+00 | -0.01 | 9.88E-01 | 9.98E-01 |
| <b>RHBDL3</b>      | -0.63 | 3.13E-01 | 1.00E+00 | -0.04 | 9.88E-01 | 9.98E-01 |
| <b>ZNF653</b>      | -0.67 | 1.99E-02 | 8.80E-01 | -0.01 | 9.88E-01 | 9.98E-01 |
| <b>TBL1Y</b>       | -0.16 | 8.83E-01 | 1.00E+00 | 0.03  | 9.88E-01 | 9.98E-01 |
| <b>USP48</b>       | 0.12  | 4.63E-01 | 1.00E+00 | 0.00  | 9.88E-01 | 9.98E-01 |
| <b>NKPD1</b>       | -0.02 | 9.75E-01 | 1.00E+00 | -0.01 | 9.88E-01 | 9.98E-01 |
| <b>NAV2</b>        | -0.34 | 5.36E-01 | 1.00E+00 | 0.01  | 9.88E-01 | 9.98E-01 |
| <b>GTF2IRD1P1</b>  | -0.85 | 4.83E-01 | 1.00E+00 | -0.01 | 9.88E-01 | 9.98E-01 |
| <b>METTL4</b>      | 0.06  | 8.47E-01 | 1.00E+00 | 0.01  | 9.89E-01 | 9.98E-01 |
| <b>XLOC_008033</b> | 0.57  | 6.22E-01 | 1.00E+00 | -0.01 | 9.89E-01 | 9.98E-01 |
| <b>ANO5</b>        | 0.19  | 8.79E-01 | 1.00E+00 | -0.01 | 9.89E-01 | 9.98E-01 |
| <b>ENDOV</b>       | 0.17  | 3.92E-01 | 1.00E+00 | 0.00  | 9.89E-01 | 9.98E-01 |
| <b>AL606834.1</b>  | 0.72  | 2.01E-01 | 1.00E+00 | -0.01 | 9.89E-01 | 9.98E-01 |
| <b>ACTBL2</b>      | 0.58  | 8.60E-01 | 1.00E+00 | 0.05  | 9.89E-01 | 9.98E-01 |
| <b>AL031719.1</b>  | 1.24  | 3.90E-01 | 1.00E+00 | 0.01  | 9.89E-01 | 9.98E-01 |
| <b>TMEM161A</b>    | -0.44 | 8.51E-02 | 1.00E+00 | 0.00  | 9.89E-01 | 9.98E-01 |
| <b>PHYKPL</b>      | 0.34  | 2.33E-01 | 1.00E+00 | 0.00  | 9.89E-01 | 9.98E-01 |
| <b>ETV4</b>        | -0.40 | 1.61E-01 | 1.00E+00 | 0.01  | 9.89E-01 | 9.98E-01 |
| <b>AC002558.1</b>  | -1.59 | 2.64E-01 | 1.00E+00 | -0.02 | 9.89E-01 | 9.98E-01 |
| <b>WNT6</b>        | 0.02  | 9.71E-01 | 1.00E+00 | 0.04  | 9.89E-01 | 9.98E-01 |
| <b>CHMP7</b>       | 0.22  | 2.22E-01 | 1.00E+00 | 0.00  | 9.89E-01 | 9.98E-01 |
| <b>NPHP4</b>       | -0.15 | 6.44E-01 | 1.00E+00 | -0.01 | 9.89E-01 | 9.98E-01 |
| <b>UPK3B</b>       | 1.21  | 7.46E-02 | 1.00E+00 | 0.01  | 9.89E-01 | 9.98E-01 |
| <b>FIZ1</b>        | -0.25 | 2.88E-01 | 1.00E+00 | -0.01 | 9.89E-01 | 9.98E-01 |
| <b>XLOC_007486</b> | 2.73  | 2.12E-01 | 1.00E+00 | 0.04  | 9.89E-01 | 9.98E-01 |
| <b>PSMG3</b>       | -0.31 | 2.99E-01 | 1.00E+00 | 0.00  | 9.89E-01 | 9.98E-01 |
| <b>AC005330.1</b>  | -0.16 | 9.14E-01 | 1.00E+00 | 0.03  | 9.89E-01 | 9.98E-01 |
| <b>IL20RB</b>      | 0.39  | 2.91E-01 | 1.00E+00 | -0.01 | 9.89E-01 | 9.98E-01 |
| <b>TPCN2</b>       | -0.06 | 7.36E-01 | 1.00E+00 | -0.01 | 9.89E-01 | 9.98E-01 |
| <b>UHRF1BP1L</b>   | -0.08 | 7.48E-01 | 1.00E+00 | 0.00  | 9.90E-01 | 9.98E-01 |

|             |       |          |          |       |          |          |
|-------------|-------|----------|----------|-------|----------|----------|
| ITGB1       | 0.46  | 2.15E-01 | 1.00E+00 | 0.01  | 9.90E-01 | 9.98E-01 |
| XLOC_002653 | -0.38 | 7.29E-01 | 1.00E+00 | -0.01 | 9.90E-01 | 9.98E-01 |
| SET         | -0.07 | 6.84E-01 | 1.00E+00 | 0.00  | 9.90E-01 | 9.98E-01 |
| MSH6        | -0.14 | 5.29E-01 | 1.00E+00 | 0.00  | 9.90E-01 | 9.98E-01 |
| AC027575.2  | -2.73 | 2.66E-01 | 1.00E+00 | -0.01 | 9.90E-01 | 9.98E-01 |
| RABAC1      | 0.06  | 9.39E-01 | 1.00E+00 | 0.01  | 9.90E-01 | 9.98E-01 |
| SLC35E4     | -0.08 | 7.36E-01 | 1.00E+00 | 0.01  | 9.90E-01 | 9.98E-01 |
| ZNF492      | 0.09  | 9.09E-01 | 1.00E+00 | 0.01  | 9.90E-01 | 9.98E-01 |
| G5552       | 0.05  | 9.76E-01 | 1.00E+00 | 0.01  | 9.90E-01 | 9.98E-01 |
| PIGS        | 0.23  | 1.71E-01 | 1.00E+00 | 0.00  | 9.90E-01 | 9.98E-01 |
| ERH         | 0.14  | 3.95E-01 | 1.00E+00 | 0.00  | 9.90E-01 | 9.98E-01 |
| ALX4        | -0.15 | 8.47E-01 | 1.00E+00 | -0.01 | 9.90E-01 | 9.98E-01 |
| GJB3        | 0.00  | 9.97E-01 | 1.00E+00 | -0.01 | 9.90E-01 | 9.98E-01 |
| VAC14-AS1   | 1.56  | 2.00E-01 | 1.00E+00 | 0.01  | 9.90E-01 | 9.98E-01 |
| RPS29P16    | 0.56  | 8.71E-01 | 1.00E+00 | 0.01  | 9.90E-01 | 9.98E-01 |
| XLOC_009198 | -3.23 | 4.32E-03 | 3.72E-01 | 0.01  | 9.90E-01 | 9.98E-01 |
| G40866      | -2.03 | 5.49E-01 | 1.00E+00 | 0.01  | 9.90E-01 | 9.98E-01 |
| ATRX        | 0.03  | 8.62E-01 | 1.00E+00 | 0.00  | 9.90E-01 | 9.98E-01 |
| C4orf46     | 0.45  | 1.51E-01 | 1.00E+00 | 0.01  | 9.90E-01 | 9.98E-01 |
| AC120053.1  | 0.80  | 3.32E-01 | 1.00E+00 | -0.01 | 9.90E-01 | 9.98E-01 |
| PCNPP5      | 0.98  | 7.78E-01 | 1.00E+00 | -0.01 | 9.90E-01 | 9.98E-01 |
| ANKRD34A    | -0.30 | 6.79E-01 | 1.00E+00 | -0.01 | 9.90E-01 | 9.98E-01 |
| TYR         | 0.16  | 7.92E-01 | 1.00E+00 | -0.01 | 9.90E-01 | 9.98E-01 |
| LINC01252   | -0.18 | 8.86E-01 | 1.00E+00 | 0.01  | 9.90E-01 | 9.98E-01 |
| LRCH1       | 0.09  | 7.58E-01 | 1.00E+00 | 0.00  | 9.90E-01 | 9.98E-01 |
| CYP27C1     | -0.08 | 8.46E-01 | 1.00E+00 | -0.01 | 9.90E-01 | 9.98E-01 |
| CAPN5       | -0.09 | 8.43E-01 | 1.00E+00 | 0.01  | 9.90E-01 | 9.98E-01 |
| AC062004.1  | 0.02  | 9.91E-01 | 1.00E+00 | 0.04  | 9.91E-01 | 9.98E-01 |
| KRTAP11-1   | -6.92 | 3.48E-02 | 1.00E+00 | -0.04 | 9.91E-01 | 9.98E-01 |
| CDAN1       | -0.02 | 9.32E-01 | 1.00E+00 | -0.01 | 9.91E-01 | 9.98E-01 |
| TXNDC17     | -0.17 | 3.48E-01 | 1.00E+00 | 0.00  | 9.91E-01 | 9.98E-01 |
| KLHL41      | -1.41 | 4.47E-01 | 1.00E+00 | 0.02  | 9.91E-01 | 9.98E-01 |

|                    |        |          |          |       |          |          |
|--------------------|--------|----------|----------|-------|----------|----------|
| <b>TXLNA</b>       | -0.05  | 8.16E-01 | 1.00E+00 | 0.00  | 9.91E-01 | 9.98E-01 |
| <b>DCAF1</b>       | 0.17   | 5.15E-01 | 1.00E+00 | 0.00  | 9.91E-01 | 9.98E-01 |
| <b>BEST3</b>       | -0.44  | 7.21E-01 | 1.00E+00 | 0.01  | 9.91E-01 | 9.98E-01 |
| <b>ETF1</b>        | 0.09   | 6.63E-01 | 1.00E+00 | 0.00  | 9.91E-01 | 9.98E-01 |
| <b>HOTAIR</b>      | -0.18  | 7.58E-01 | 1.00E+00 | 0.01  | 9.91E-01 | 9.98E-01 |
| <b>LY6G6C</b>      | 0.33   | 5.26E-01 | 1.00E+00 | 0.01  | 9.91E-01 | 9.98E-01 |
| <b>PLXNA2</b>      | -0.07  | 8.37E-01 | 1.00E+00 | 0.00  | 9.91E-01 | 9.98E-01 |
| <b>RPL12P12</b>    | -3.22  | 1.17E-01 | 1.00E+00 | -0.01 | 9.91E-01 | 9.98E-01 |
| <b>SUSD3</b>       | -0.37  | 3.92E-01 | 1.00E+00 | -0.01 | 9.91E-01 | 9.98E-01 |
| <b>GTF2F2</b>      | 0.14   | 7.12E-01 | 1.00E+00 | 0.00  | 9.91E-01 | 9.98E-01 |
| <b>AC004990.1</b>  | 1.07   | 6.54E-01 | 1.00E+00 | -0.01 | 9.91E-01 | 9.98E-01 |
| <b>MPP5</b>        | 0.25   | 3.14E-01 | 1.00E+00 | 0.00  | 9.91E-01 | 9.98E-01 |
| <b>PDGFD</b>       | 0.85   | 9.11E-02 | 1.00E+00 | -0.01 | 9.91E-01 | 9.98E-01 |
| <b>G31329</b>      | 0.10   | 9.07E-01 | 1.00E+00 | 0.01  | 9.92E-01 | 9.98E-01 |
| <b>AC018521.6</b>  | -0.20  | 7.87E-01 | 1.00E+00 | 0.01  | 9.92E-01 | 9.98E-01 |
| <b>CST6</b>        | 0.03   | 9.54E-01 | 1.00E+00 | -0.01 | 9.92E-01 | 9.98E-01 |
| <b>PEPD</b>        | 0.17   | 2.84E-01 | 1.00E+00 | 0.00  | 9.92E-01 | 9.98E-01 |
| <b>SUPT16HP1</b>   | 1.10   | 7.50E-01 | 1.00E+00 | -0.01 | 9.92E-01 | 9.98E-01 |
| <b>Z69706.1</b>    | -0.39  | 7.52E-01 | 1.00E+00 | 0.01  | 9.92E-01 | 9.98E-01 |
| <b>TRMT6</b>       | -0.18  | 5.04E-01 | 1.00E+00 | 0.00  | 9.92E-01 | 9.98E-01 |
| <b>MTRR</b>        | 0.17   | 3.74E-01 | 1.00E+00 | 0.00  | 9.92E-01 | 9.98E-01 |
| <b>XLOC_014010</b> | -0.56  | 8.73E-01 | 1.00E+00 | 0.01  | 9.92E-01 | 9.98E-01 |
| <b>FTH1P15</b>     | -10.56 | 2.06E-03 | 2.39E-01 | 0.01  | 9.92E-01 | 9.99E-01 |
| <b>PSMA4</b>       | -0.02  | 9.00E-01 | 1.00E+00 | 0.00  | 9.92E-01 | 9.99E-01 |
| <b>POP7</b>        | -0.14  | 5.72E-01 | 1.00E+00 | 0.00  | 9.92E-01 | 9.99E-01 |
| <b>AP000911.1</b>  | -0.94  | 9.41E-02 | 1.00E+00 | 0.00  | 9.92E-01 | 9.99E-01 |
| <b>PFDN2</b>       | -0.06  | 7.46E-01 | 1.00E+00 | 0.00  | 9.92E-01 | 9.99E-01 |
| <b>SDC1</b>        | -0.15  | 7.10E-01 | 1.00E+00 | 0.00  | 9.92E-01 | 9.99E-01 |
| <b>B4GALT4</b>     | 0.21   | 3.82E-01 | 1.00E+00 | 0.00  | 9.92E-01 | 9.99E-01 |
| <b>RPL17P43</b>    | -0.48  | 8.87E-01 | 1.00E+00 | -0.01 | 9.92E-01 | 9.99E-01 |
| <b>SOCS2-AS1</b>   | -0.02  | 9.78E-01 | 1.00E+00 | 0.01  | 9.92E-01 | 9.99E-01 |
| <b>NR2E3</b>       | 2.29   | 4.14E-01 | 1.00E+00 | 0.01  | 9.93E-01 | 9.99E-01 |

|                   |       |          |          |       |          |          |
|-------------------|-------|----------|----------|-------|----------|----------|
| <b>AC144530.1</b> | -1.79 | 2.23E-01 | 1.00E+00 | 0.01  | 9.93E-01 | 9.99E-01 |
| <b>TMX3</b>       | 0.30  | 3.46E-01 | 1.00E+00 | 0.00  | 9.93E-01 | 9.99E-01 |
| <b>AP003486.1</b> | 0.67  | 1.48E-01 | 1.00E+00 | 0.00  | 9.93E-01 | 9.99E-01 |
| <b>ATP11B</b>     | 0.22  | 5.62E-01 | 1.00E+00 | 0.00  | 9.93E-01 | 9.99E-01 |
| <b>CHP1</b>       | -0.04 | 8.30E-01 | 1.00E+00 | 0.00  | 9.93E-01 | 9.99E-01 |
| <b>PTPRM</b>      | 0.04  | 9.19E-01 | 1.00E+00 | 0.00  | 9.93E-01 | 9.99E-01 |
| <b>COL26A1</b>    | -1.09 | 1.53E-01 | 1.00E+00 | -0.01 | 9.93E-01 | 9.99E-01 |
| <b>RSPRY1</b>     | 0.04  | 8.58E-01 | 1.00E+00 | 0.00  | 9.93E-01 | 9.99E-01 |
| <b>DCAF16</b>     | -0.16 | 4.83E-01 | 1.00E+00 | 0.00  | 9.93E-01 | 9.99E-01 |
| <b>UGDH-AS1</b>   | -0.07 | 8.83E-01 | 1.00E+00 | 0.00  | 9.93E-01 | 9.99E-01 |
| <b>AC093620.1</b> | 0.58  | 5.79E-01 | 1.00E+00 | 0.01  | 9.93E-01 | 9.99E-01 |
| <b>STX1B</b>      | -1.17 | 8.40E-02 | 1.00E+00 | 0.01  | 9.93E-01 | 9.99E-01 |
| <b>AL161669.3</b> | -5.08 | 1.24E-01 | 1.00E+00 | -0.01 | 9.93E-01 | 9.99E-01 |
| <b>TAX1BP3</b>    | 1.49  | 2.74E-02 | 9.66E-01 | 0.01  | 9.93E-01 | 9.99E-01 |
| <b>GIN54</b>      | -0.65 | 3.95E-02 | 1.00E+00 | -0.01 | 9.93E-01 | 9.99E-01 |
| <b>WHAMM</b>      | 0.02  | 9.36E-01 | 1.00E+00 | 0.00  | 9.93E-01 | 9.99E-01 |
| <b>CYBRD1</b>     | 0.67  | 1.67E-01 | 1.00E+00 | 0.00  | 9.94E-01 | 9.99E-01 |
| <b>HRH4</b>       | -0.88 | 5.74E-01 | 1.00E+00 | -0.02 | 9.94E-01 | 9.99E-01 |
| <b>ELOB</b>       | -0.10 | 5.50E-01 | 1.00E+00 | 0.00  | 9.94E-01 | 9.99E-01 |
| <b>FRMD8</b>      | -0.22 | 4.55E-01 | 1.00E+00 | 0.00  | 9.94E-01 | 9.99E-01 |
| <b>UBE2O</b>      | -0.26 | 2.25E-01 | 1.00E+00 | 0.00  | 9.94E-01 | 9.99E-01 |
| <b>TBCEL</b>      | 0.26  | 4.04E-01 | 1.00E+00 | 0.00  | 9.94E-01 | 9.99E-01 |
| <b>RNFT2</b>      | -0.82 | 2.80E-01 | 1.00E+00 | 0.00  | 9.94E-01 | 9.99E-01 |
| <b>ZNF506</b>     | -0.10 | 6.77E-01 | 1.00E+00 | 0.00  | 9.94E-01 | 9.99E-01 |
| <b>WDR92</b>      | 0.22  | 4.80E-01 | 1.00E+00 | 0.00  | 9.94E-01 | 9.99E-01 |
| <b>R3HDM1</b>     | -0.24 | 2.47E-01 | 1.00E+00 | 0.00  | 9.94E-01 | 9.99E-01 |
| <b>RPL5</b>       | -0.18 | 5.80E-01 | 1.00E+00 | 0.00  | 9.94E-01 | 9.99E-01 |
| <b>NCAM1</b>      | -0.16 | 7.46E-01 | 1.00E+00 | 0.00  | 9.94E-01 | 9.99E-01 |
| <b>PIKFYVE</b>    | 0.30  | 1.49E-01 | 1.00E+00 | 0.00  | 9.94E-01 | 9.99E-01 |
| <b>AC093591.3</b> | 0.73  | 5.21E-01 | 1.00E+00 | 0.01  | 9.94E-01 | 9.99E-01 |
| <b>AC084859.1</b> | -0.49 | 4.64E-01 | 1.00E+00 | -0.01 | 9.94E-01 | 9.99E-01 |
| <b>MOCS3</b>      | 0.18  | 4.91E-01 | 1.00E+00 | 0.00  | 9.94E-01 | 9.99E-01 |

|                    |       |          |          |       |          |          |
|--------------------|-------|----------|----------|-------|----------|----------|
| <b>FEM1B</b>       | 0.13  | 5.96E-01 | 1.00E+00 | 0.00  | 9.94E-01 | 9.99E-01 |
| <b>KLF14</b>       | 1.48  | 4.94E-02 | 1.00E+00 | -0.01 | 9.94E-01 | 9.99E-01 |
| <b>STX19</b>       | 0.15  | 6.80E-01 | 1.00E+00 | 0.00  | 9.94E-01 | 9.99E-01 |
| <b>CFAP44</b>      | 1.63  | 5.42E-02 | 1.00E+00 | 0.01  | 9.94E-01 | 9.99E-01 |
| <b>KLF11</b>       | -0.06 | 8.49E-01 | 1.00E+00 | 0.00  | 9.94E-01 | 9.99E-01 |
| <b>SHISA9</b>      | -0.14 | 8.67E-01 | 1.00E+00 | -0.01 | 9.94E-01 | 9.99E-01 |
| <b>KDM6A</b>       | -0.07 | 6.69E-01 | 1.00E+00 | 0.00  | 9.94E-01 | 9.99E-01 |
| <b>XLOC_008116</b> | 0.39  | 8.20E-01 | 1.00E+00 | 0.01  | 9.94E-01 | 9.99E-01 |
| <b>BEGAIN</b>      | -0.91 | 1.12E-01 | 1.00E+00 | 0.01  | 9.94E-01 | 9.99E-01 |
| <b>BEAN1</b>       | 0.02  | 9.64E-01 | 1.00E+00 | -0.01 | 9.94E-01 | 9.99E-01 |
| <b>CEP85L</b>      | 0.27  | 4.55E-01 | 1.00E+00 | 0.00  | 9.94E-01 | 9.99E-01 |
| <b>LINC01291</b>   | 0.28  | 7.65E-01 | 1.00E+00 | 0.01  | 9.95E-01 | 9.99E-01 |
| <b>RASA4B</b>      | -0.30 | 7.09E-01 | 1.00E+00 | 0.01  | 9.95E-01 | 9.99E-01 |
| <b>NUDT17</b>      | 0.27  | 5.85E-01 | 1.00E+00 | 0.00  | 9.95E-01 | 9.99E-01 |
| <b>AAMP</b>        | -0.02 | 8.82E-01 | 1.00E+00 | 0.00  | 9.95E-01 | 9.99E-01 |
| <b>AC010207.1</b>  | -3.51 | 5.97E-03 | 4.59E-01 | 0.01  | 9.95E-01 | 9.99E-01 |
| <b>ZNF750</b>      | -0.58 | 2.73E-01 | 1.00E+00 | 0.00  | 9.95E-01 | 9.99E-01 |
| <b>GPR157</b>      | -0.16 | 6.77E-01 | 1.00E+00 | 0.00  | 9.95E-01 | 9.99E-01 |
| <b>LINC01863</b>   | -2.44 | 2.78E-01 | 1.00E+00 | 0.00  | 9.95E-01 | 9.99E-01 |
| <b>LINC01934</b>   | -1.88 | 1.77E-01 | 1.00E+00 | -0.01 | 9.95E-01 | 9.99E-01 |
| <b>TMEM250</b>     | 0.05  | 8.45E-01 | 1.00E+00 | 0.00  | 9.95E-01 | 9.99E-01 |
| <b>1-Dec</b>       | -2.93 | 7.24E-02 | 1.00E+00 | -0.01 | 9.95E-01 | 9.99E-01 |
| <b>AL136164.3</b>  | 0.08  | 9.45E-01 | 1.00E+00 | -0.01 | 9.95E-01 | 9.99E-01 |
| <b>XLOC_013981</b> | -2.14 | 2.28E-01 | 1.00E+00 | 0.01  | 9.95E-01 | 9.99E-01 |
| <b>ME3</b>         | 0.18  | 7.81E-01 | 1.00E+00 | 0.00  | 9.95E-01 | 9.99E-01 |
| <b>MLF2</b>        | -0.15 | 4.25E-01 | 1.00E+00 | 0.00  | 9.95E-01 | 9.99E-01 |
| <b>AL035456.1</b>  | 1.44  | 5.18E-01 | 1.00E+00 | 0.00  | 9.95E-01 | 9.99E-01 |
| <b>GLUL</b>        | 0.27  | 4.04E-01 | 1.00E+00 | 0.00  | 9.95E-01 | 9.99E-01 |
| <b>CTF1</b>        | 0.55  | 2.19E-01 | 1.00E+00 | 0.00  | 9.96E-01 | 9.99E-01 |
| <b>RHCE</b>        | 0.45  | 4.22E-01 | 1.00E+00 | 0.00  | 9.96E-01 | 9.99E-01 |
| <b>NECAB2</b>      | -3.55 | 3.61E-02 | 1.00E+00 | 0.01  | 9.96E-01 | 9.99E-01 |
| <b>SMARCE1P5</b>   | -0.86 | 8.05E-01 | 1.00E+00 | 0.00  | 9.96E-01 | 9.99E-01 |



|                   |       |          |          |       |          |          |
|-------------------|-------|----------|----------|-------|----------|----------|
| <b>FOXL2</b>      | 0.50  | 5.66E-01 | 1.00E+00 | 0.02  | 9.96E-01 | 9.99E-01 |
| <b>AF001548.3</b> | 0.35  | 8.16E-01 | 1.00E+00 | 0.01  | 9.96E-01 | 9.99E-01 |
| <b>XKR5</b>       | -0.85 | 4.78E-01 | 1.00E+00 | -0.01 | 9.96E-01 | 9.99E-01 |
| <b>ATP2B2</b>     | -1.13 | 1.07E-01 | 1.00E+00 | 0.00  | 9.96E-01 | 9.99E-01 |
| <b>SOX11</b>      | -4.02 | 1.09E-02 | 6.43E-01 | 0.00  | 9.96E-01 | 9.99E-01 |
| <b>SNRNP25</b>    | -0.43 | 9.36E-02 | 1.00E+00 | 0.00  | 9.96E-01 | 9.99E-01 |
| <b>G34551</b>     | -0.73 | 2.10E-01 | 1.00E+00 | 0.00  | 9.96E-01 | 9.99E-01 |
| <b>ATP5MC1P6</b>  | -3.61 | 4.00E-02 | 1.00E+00 | 0.00  | 9.96E-01 | 9.99E-01 |
| <b>LINC00954</b>  | 2.33  | 8.51E-02 | 1.00E+00 | 0.01  | 9.96E-01 | 9.99E-01 |
| <b>NUP62CL</b>    | -0.27 | 6.57E-01 | 1.00E+00 | 0.00  | 9.96E-01 | 9.99E-01 |
| <b>NTM</b>        | 0.52  | 2.43E-02 | 9.22E-01 | 0.00  | 9.96E-01 | 9.99E-01 |
| <b>CDON</b>       | 0.12  | 7.51E-01 | 1.00E+00 | 0.00  | 9.96E-01 | 9.99E-01 |
| <b>ZNF200</b>     | 0.39  | 2.81E-01 | 1.00E+00 | 0.00  | 9.96E-01 | 9.99E-01 |
| <b>ELOA</b>       | -0.06 | 8.23E-01 | 1.00E+00 | 0.00  | 9.97E-01 | 9.99E-01 |
| <b>TULP3</b>      | 0.01  | 9.65E-01 | 1.00E+00 | 0.00  | 9.97E-01 | 9.99E-01 |
| <b>HP</b>         | 1.74  | 4.10E-01 | 1.00E+00 | 0.01  | 9.97E-01 | 9.99E-01 |
| <b>C9orf66</b>    | 0.11  | 8.82E-01 | 1.00E+00 | 0.00  | 9.97E-01 | 9.99E-01 |
| <b>CEP192</b>     | -0.03 | 8.92E-01 | 1.00E+00 | 0.00  | 9.97E-01 | 9.99E-01 |
| <b>SMIM10</b>     | -0.04 | 9.37E-01 | 1.00E+00 | 0.00  | 9.97E-01 | 9.99E-01 |
| <b>AC004947.1</b> | -0.18 | 7.50E-01 | 1.00E+00 | 0.00  | 9.97E-01 | 9.99E-01 |
| <b>HLA-DQB1</b>   | -0.71 | 2.00E-01 | 1.00E+00 | 0.00  | 9.97E-01 | 1.00E+00 |
| <b>SNORD17</b>    | -1.84 | 5.92E-01 | 1.00E+00 | 0.00  | 9.97E-01 | 1.00E+00 |
| <b>STAT5B</b>     | 0.33  | 2.13E-01 | 1.00E+00 | 0.00  | 9.97E-01 | 1.00E+00 |
| <b>AC023157.2</b> | NA    | NA       | NA       | 0.00  | 9.97E-01 | 1.00E+00 |
| <b>G35261</b>     | -0.34 | 7.67E-01 | 1.00E+00 | 0.00  | 9.97E-01 | 1.00E+00 |
| <b>MUTYH</b>      | 0.01  | 9.81E-01 | 1.00E+00 | 0.00  | 9.97E-01 | 1.00E+00 |
| <b>KDM5D</b>      | 0.19  | 7.21E-01 | 1.00E+00 | 0.00  | 9.97E-01 | 1.00E+00 |
| <b>AC072061.1</b> | 0.11  | 8.37E-01 | 1.00E+00 | 0.00  | 9.97E-01 | 1.00E+00 |
| <b>TP53AIP1</b>   | -0.47 | 2.42E-01 | 1.00E+00 | 0.00  | 9.97E-01 | 1.00E+00 |
| <b>TMEM273</b>    | -0.07 | 8.89E-01 | 1.00E+00 | 0.00  | 9.97E-01 | 1.00E+00 |
| <b>AL121983.2</b> | -1.82 | 1.34E-01 | 1.00E+00 | 0.00  | 9.97E-01 | 1.00E+00 |
| <b>KIF15</b>      | 0.19  | 5.20E-01 | 1.00E+00 | 0.00  | 9.97E-01 | 1.00E+00 |

|                   |       |          |          |      |          |          |
|-------------------|-------|----------|----------|------|----------|----------|
| <b>ALG1L</b>      | 0.12  | 8.13E-01 | 1.00E+00 | 0.00 | 9.97E-01 | 1.00E+00 |
| <b>G28274</b>     | -1.13 | 3.07E-01 | 1.00E+00 | 0.00 | 9.98E-01 | 1.00E+00 |
| <b>LBP</b>        | 2.63  | 4.34E-01 | 1.00E+00 | 0.00 | 9.98E-01 | 1.00E+00 |
| <b>MLXIPL</b>     | 1.18  | 1.96E-01 | 1.00E+00 | 0.00 | 9.98E-01 | 1.00E+00 |
| <b>NFE4</b>       | -0.64 | 8.51E-01 | 1.00E+00 | 0.01 | 9.98E-01 | 1.00E+00 |
| <b>ZDHC5</b>      | -0.18 | 5.56E-01 | 1.00E+00 | 0.00 | 9.98E-01 | 1.00E+00 |
| <b>FBXO30</b>     | -0.40 | 4.63E-02 | 1.00E+00 | 0.00 | 9.98E-01 | 1.00E+00 |
| <b>UNK</b>        | -0.07 | 7.45E-01 | 1.00E+00 | 0.00 | 9.98E-01 | 1.00E+00 |
| <b>ETV2</b>       | 0.16  | 6.86E-01 | 1.00E+00 | 0.00 | 9.98E-01 | 1.00E+00 |
| <b>INTS5</b>      | -0.10 | 6.45E-01 | 1.00E+00 | 0.00 | 9.98E-01 | 1.00E+00 |
| <b>FLAD1</b>      | -0.19 | 4.51E-01 | 1.00E+00 | 0.00 | 9.98E-01 | 1.00E+00 |
| <b>VRK3</b>       | 0.11  | 5.78E-01 | 1.00E+00 | 0.00 | 9.98E-01 | 1.00E+00 |
| <b>ETV5</b>       | 0.40  | 3.35E-01 | 1.00E+00 | 0.00 | 9.98E-01 | 1.00E+00 |
| <b>LYRM4-AS1</b>  | -1.05 | 3.45E-02 | 1.00E+00 | 0.00 | 9.98E-01 | 1.00E+00 |
| <b>G11315</b>     | -1.79 | 4.90E-01 | 1.00E+00 | 0.01 | 9.98E-01 | 1.00E+00 |
| <b>HNRNPKP4</b>   | -0.92 | 6.25E-01 | 1.00E+00 | 0.00 | 9.98E-01 | 1.00E+00 |
| <b>CDH23</b>      | 0.57  | 1.40E-01 | 1.00E+00 | 0.00 | 9.98E-01 | 1.00E+00 |
| <b>LRR37A4P</b>   | -0.28 | 6.64E-01 | 1.00E+00 | 0.00 | 9.98E-01 | 1.00E+00 |
| <b>AC113935.1</b> | -0.08 | 8.45E-01 | 1.00E+00 | 0.00 | 9.98E-01 | 1.00E+00 |
| <b>TCAF2C</b>     | -3.35 | 4.73E-02 | 1.00E+00 | 0.00 | 9.98E-01 | 1.00E+00 |
| <b>VPS41</b>      | 0.12  | 4.91E-01 | 1.00E+00 | 0.00 | 9.98E-01 | 1.00E+00 |
| <b>STK11</b>      | -0.18 | 4.57E-01 | 1.00E+00 | 0.00 | 9.98E-01 | 1.00E+00 |
| <b>AC011472.1</b> | 0.23  | 8.06E-01 | 1.00E+00 | 0.00 | 9.98E-01 | 1.00E+00 |
| <b>IQCC</b>       | 0.19  | 5.89E-01 | 1.00E+00 | 0.00 | 9.98E-01 | 1.00E+00 |
| <b>BX088645.3</b> | -0.36 | 7.56E-01 | 1.00E+00 | 0.00 | 9.99E-01 | 1.00E+00 |
| <b>POLH-AS1</b>   | -0.58 | 7.14E-01 | 1.00E+00 | 0.00 | 9.99E-01 | 1.00E+00 |
| <b>FZD10</b>      | -0.20 | 5.39E-01 | 1.00E+00 | 0.00 | 9.99E-01 | 1.00E+00 |
| <b>TGM5</b>       | 0.43  | 3.57E-01 | 1.00E+00 | 0.00 | 9.99E-01 | 1.00E+00 |
| <b>GPC3</b>       | 0.78  | 1.47E-01 | 1.00E+00 | 0.00 | 9.99E-01 | 1.00E+00 |
| <b>SLC17A7</b>    | -0.70 | 2.50E-01 | 1.00E+00 | 0.00 | 9.99E-01 | 1.00E+00 |
| <b>AL136038.5</b> | -1.61 | 6.37E-01 | 1.00E+00 | 0.00 | 9.99E-01 | 1.00E+00 |
| <b>CLEC1A</b>     | 0.39  | 4.28E-01 | 1.00E+00 | 0.00 | 9.99E-01 | 1.00E+00 |

|                       |       |          |          |      |          |          |
|-----------------------|-------|----------|----------|------|----------|----------|
| <b>RCBTB2</b>         | 0.05  | 8.93E-01 | 1.00E+00 | 0.00 | 9.99E-01 | 1.00E+00 |
| <b>NTHL1</b>          | 0.11  | 7.14E-01 | 1.00E+00 | 0.00 | 9.99E-01 | 1.00E+00 |
| <b>KCNK15</b>         | 0.86  | 1.86E-01 | 1.00E+00 | 0.00 | 9.99E-01 | 1.00E+00 |
| <b>AC022613.2</b>     | 0.15  | 7.26E-01 | 1.00E+00 | 0.00 | 9.99E-01 | 1.00E+00 |
| <b>FREM3</b>          | -3.37 | 2.37E-01 | 1.00E+00 | 0.00 | 9.99E-01 | 1.00E+00 |
| <b>MT-TR</b>          | NA    | NA       | NA       | 0.00 | 9.99E-01 | 1.00E+00 |
| <b>RTEL1-TNFRSF6B</b> | -1.76 | 2.26E-01 | 1.00E+00 | 0.00 | 9.99E-01 | 1.00E+00 |
| <b>RPS6KA1</b>        | -0.32 | 1.60E-01 | 1.00E+00 | 0.00 | 9.99E-01 | 1.00E+00 |
| <b>NDFIP1</b>         | 0.29  | 3.74E-01 | 1.00E+00 | 0.00 | 9.99E-01 | 1.00E+00 |
| <b>TNNT1</b>          | 0.24  | 5.23E-01 | 1.00E+00 | 0.00 | 1.00E+00 | 1.00E+00 |
| <b>AC099336.2</b>     | 0.24  | 6.77E-01 | 1.00E+00 | 0.00 | 1.00E+00 | 1.00E+00 |
| <b>CDK6</b>           | 0.15  | 5.63E-01 | 1.00E+00 | 0.00 | 1.00E+00 | 1.00E+00 |
| <b>NMNAT1</b>         | -0.28 | 2.68E-01 | 1.00E+00 | 0.00 | 1.00E+00 | 1.00E+00 |
| <b>ZNF76</b>          | -0.19 | 3.47E-01 | 1.00E+00 | 0.00 | 1.00E+00 | 1.00E+00 |
| <b>AL365214.2</b>     | 3.36  | 2.37E-03 | 2.46E-01 | 0.00 | 1.00E+00 | 1.00E+00 |
| <b>G12797</b>         | 0.79  | 4.40E-01 | 1.00E+00 | 0.00 | 1.00E+00 | 1.00E+00 |
| <b>COL4A3BP</b>       | 0.35  | 6.60E-02 | 1.00E+00 | 0.00 | 1.00E+00 | 1.00E+00 |
| <b>XLOC_001153</b>    | 0.75  | 7.85E-01 | 1.00E+00 | 0.00 | 1.00E+00 | 1.00E+00 |
| <b>EMILIN3</b>        | 0.27  | 5.83E-01 | 1.00E+00 | 0.00 | 1.00E+00 | 1.00E+00 |
| <b>CAPZA1</b>         | 0.25  | 4.16E-01 | 1.00E+00 | 0.00 | 1.00E+00 | 1.00E+00 |
| <b>TTY14</b>          | 0.04  | 9.57E-01 | 1.00E+00 | 0.00 | 1.00E+00 | 1.00E+00 |
| <b>CRYBG2</b>         | -0.36 | 3.78E-01 | 1.00E+00 | 0.00 | 1.00E+00 | 1.00E+00 |
| <b>TXLNG</b>          | 0.31  | 2.45E-01 | 1.00E+00 | 0.00 | 1.00E+00 | 1.00E+00 |
| <b>NBAS</b>           | -0.28 | 1.50E-01 | 1.00E+00 | 0.00 | 1.00E+00 | 1.00E+00 |

**Supplementary Table 2:** Significantly differentially expressed genes under each condition (Healthy Control - HC, Lupus - L, Non-scarring - NS, and Scarring - S) for each stimulation (online access).

**Supplementary Table 3:** Negative (Neg) and Positive (Pos) Effect Sizes (ES) across condition comparisons (HC vs. L and S vs. NS) for each stimulation (online access).

**Supplementary Table 4:** Summary statistics for the differential expression analysis between scarring and non-scarring lesional skin samples from lupus patients (online access).

**Supplementary Table 5:** Medications reported from the time of enrollment

|                    | Non-damage ( <i>n</i> = 13) | Damage ( <i>n</i> = 8) |
|--------------------|-----------------------------|------------------------|
| <b>Medications</b> |                             |                        |
| Oral prednisone    | 8 (62%)                     | 5 (63%)                |
| Hydroxychloroquine | 8 (62%)                     | 5 (63%)                |
| Mycophenolate      | 3 (23%)                     | 4 (50%)                |
| Methotrexate       | 2 (15%)                     | 0 (0%)                 |
| Azathioprine       | 0 (0%)                      | 1 (13%)                |
| Belimumab          | 1 (8%)                      | 1 (13%)                |
| Rituximab          | 2 (15%)                     | 1 (13%)                |
| Tacrolimus topical | 0 (0%)                      | 1 (13%)                |
